# Supplementary material
Source: Frontiers journal article supplement (https://www.frontiersin.org/articles/1413183)
Supplement: Data_Sheet_1.doc [file Data_Sheet_1.doc]

| **Content** |
| --- |
| *S1.1. The resluts of forward univariable MR analysis between immune cells phenotypes and the risk of AAA in FinnGen database.* |
| *S1.2. The resluts of forward univariable MR analysis between immune cells phenotypes and the risk of AAA in UK Bio-Bank database.* |
| *S2.1 The IVs SNPs involved in immune cells phenotypes to abdominal aortic aneuryme (AAA) of FinnGen database.* |
| *S2.2 The IVs SNPs involved in immune cells phenotypes to AAA of UK Biobank database.* |
| *S2.3 The single SNP's effect estimated in immune cells phenotypes to AAA of FinnGen database.* |
| *S2.4 The single SNP's effect estimated in immune cells phenotypes to AAA of UK Biobank database.* |
| *S3.1. The resluts of forward univariable MR analysis between immune factors phenotypes and the risk of AAA in FinnGen database.* |
| *S3.2. The resluts of forward univariable MR analysis between immune factors phenotypes and the risk of AAA in UK Bio-Bank database.* |
| *S4.1 The IVs SNPs involved in immune cells phenotypes to abdominal aortic aneuryme (AAA) of FinnGen database.* |
| *S4.2 The IVs SNPs involved in immune cells phenotypes to AAA of UK Biobank database.* |
| *S4.3 The single SNP's effect estimated in immune cells phenotypes to AAA of FinnGen database.* |
| *S4.4 The single SNP's effect estimated in immune cells phenotypes to AAA of UK Biobank database.* |
| *S5.1. The resluts of forward univariable MR analysis between 1400 phenotypes of metabolites and the risk of AAA in FinnGen database.* |
| *S5.2. The resluts of forward univariable MR analysis between 1400 phenotypes of metabolites and the risk of AAA in UK Biobank database.* |
| *S6.1. The IVs SNPs involved in peripheral blood metabolites phenotypes to abdominal aortic aneuryme (AAA) of FinnGen database.* |
| *S6.2. The single SNP's effect estimated in peripheral blood metabolites phenotypes to AAA of FinnGen database.* |
| *S6.3. The IVs SNPs involved in peripheral blood metabolites phenotypes to abdominal aortic aneuryme (AAA) of UKB database.* |
| *S6.4. The single SNP's effect estimated in peripheral blood metabolites phenotypes to AAA of UKB database.* |
| *S7.1. The resluts of forward univariable MR analysis between gut microbiota and the risk of AAA in FinnGen database.* |
| *S7.2. The resluts of forward univariable MR analysis between gut microbiota phenotypes and the risk of AAA in UK Bio-Bank database.* |
| *S8.1 The IVs SNPs involved in gut microbiota phenotypes to abdominal aortic aneuryme (AAA) of FinnGen database.* |
| *S8.2 The IVs SNPs involved in gut microbiota phenotypes to AAA of UK Biobank database.* |
| *S8.3 The single SNP's effect estimated in gut microbiota phenotypes to AAA of FinnGen database.* |
| *S8.4 The single SNP's effect estimated in gut microbiota phenotypes to AAA of UK Biobank database.* |
| *S9.1. The main meta-results for peripheral blood immune cells phenotypes.* |
| *S9.2. The main meta-results for peripheral blood immune factors phenotypes.* |
| *S9.3. The main meta-results for peripheral blood metabolites phenotypes.* |
| *S9.4. The main meta-results for gut microbiota phenotypes.* |
| *S10. Reverse_MR* |
|  |
