# Supplementary material
Source: Frontiers journal article supplement (https://www.frontiersin.org/articles/1413183)
Supplement: Data_Sheet_2.docx [file Data_Sheet_2.docx]

**Supplement Figure1** Gut microbiota

**Supplement Figure2** blood metabolites

**Supplement Figure3** immune cells

**Supplement Figure4** immune factors
