# Supplementary material
Source: Frontiers journal article supplement (https://www.frontiersin.org/articles/1413183)
Supplement: Table_1.xlsx [file Table_1.xlsx]

## Sheet: Content
Content
S1.1. The resluts of forward univariable MR analysis between immune cells phenotypes and the risk of AAA in FinnGen database.
S1.2. The resluts of forward univariable MR analysis between immune cells phenotypes and the risk of AAA in UK Bio-Bank database.

## Sheet: S1.1_FinnGen
The resluts of forward univariable MR analysis between immune cells phenotypes and the risk of AAA in FinnGen database.
id	nsnp	MR-Egger			Weighted median			Inverse variance weighted			Simple mode			Weighted mode			MR-Egger intercept		MR-PRESSO global	MR-IVW			MR-Egeer
		p_value	OR	95% OR	p_value	OR	95% OR	p_value	OR	95% OR	p_value	OR	95% OR	p_value	OR	95% OR	egger intercept	p_value	p_value	Q	Q_df	Q_pval	Q	Q_df	Q_pval
ebi-a-GCST90001997	22	0.085	0.89756	0.79840-1.0090	0.063	0.92475	0.85148-1.00433	0.001	0.90292	0.85179-0.95711	0.212	0.91268	0.79426-1.04876	0.076	0.92582	0.85390-1.00380	0.00182	0.90892	0.444	22.7697	21	0.35638	22.7544	20	0.30101
ebi-a-GCST90001399	14	0.02	1.22867	1.05649-1.4289	0.004	1.1701	1.05191-1.30157	0.002	1.13189	1.04482-1.22623	0.124	1.14495	0.97416-1.34568	0.028	1.15646	1.03035-1.29801	-0.02246	0.23298	0.55	12.0486	13	0.52367	10.4707	12	0.57474
ebi-a-GCST90001763	18	0.056	0.96994	0.94223-0.9985	0.072	0.96689	0.93212-1.00296	0.004	0.96379	0.94018-0.98800	0.331	0.96267	0.89358-1.03710	0.03	0.96661	0.93981-0.99417	-0.00819	0.41767	0.854	12.4593	17	0.77156	11.7671	16	0.75985
ebi-a-GCST90001887	15	0.002	1.09968	1.04905-1.1527	0.009	1.07661	1.01835-1.13820	0.005	1.0603	1.01814-1.10420	0.135	1.08556	0.98098-1.20129	0.012	1.08149	1.02562-1.14041	-0.03211	0.02066	0.407	15.5256	14	0.3432	8.59152	13	0.80305
ebi-a-GCST90001614	14	0.572	1.08543	0.82295-1.4316	0.059	1.14689	0.99476-1.32229	0.005	1.16224	1.04610-1.29126	0.212	1.16475	0.92761-1.46251	0.084	1.2473	0.98942-1.57241	0.0128	0.61024	0.774	9.28987	13	0.75072	9.01595	12	0.70157
ebi-a-GCST90001678	19	0.095	1.05173	0.99449-1.1123	0.106	1.06075	0.98753-1.13940	0.006	1.06477	1.01784-1.11386	0.359	1.05097	0.94755-1.16569	0.102	1.05261	0.99291-1.11589	0.00811	0.47653	0.931	11.0305	18	0.89306	10.5006	17	0.88132
ebi-a-GCST90001675	24	0.126	1.04288	0.99022-1.0983	0.058	1.0556	0.99820-1.11631	0.009	1.05788	1.01439-1.10324	0.253	1.06212	0.96035-1.17468	0.091	1.04271	0.99529-1.09239	0.00842	0.36398	0.393	26.3778	23	0.28336	25.3862	22	0.27897
ebi-a-GCST90001447	19	0.1	1.07236	0.99119-1.1602	0.111	1.07189	0.98405-1.16756	0.009	1.08098	1.01986-1.14576	0.566	1.04084	0.90999-1.19051	0.083	1.0766	0.99492-1.16498	0.00509	0.77063	0.848	11.9707	18	0.84875	11.8829	17	0.80718
ebi-a-GCST90001641	18	0.936	1.00423	0.90736-1.1114	0.526	1.03249	0.93544-1.13962	0.009	1.09333	1.02242-1.16916	0.468	1.06154	0.90653-1.24305	0.402	1.04108	0.94973-1.14122	0.03058	0.04376	0.72	12.6188	17	0.7613	7.82686	16	0.95385
ebi-a-GCST90001996	31	0.208	0.96288	0.90896-1.0200	0.093	0.95473	0.90444-1.00782	0.013	0.95036	0.91294-0.98931	0.019	0.89392	0.81807-0.97680	0.053	0.95225	0.90792-0.99875	-0.0072	0.53574	0.417	32.2819	30	0.35453	31.8505	29	0.32647
ebi-a-GCST90001523	27	0.071	1.04849	0.99814-1.1014	0.03	1.05201	1.00493-1.10130	0.015	1.04793	1.00911-1.08824	0.259	1.04139	0.97205-1.11567	0.027	1.05536	1.00892-1.10394	-0.00045	0.97271	0.128	35.9755	26	0.09212	35.9738	25	0.072
ebi-a-GCST90001921	14	0.061	1.08737	1.00424-1.1774	0.062	1.08067	0.99622-1.17229	0.015	1.075	1.01387-1.13982	0.211	1.10087	0.95407-1.27026	0.115	1.07256	0.98893-1.16325	-0.00511	0.68437	0.719	10.8974	13	0.61941	10.7239	12	0.55271
ebi-a-GCST90001865	13	0.989	1.00135	0.83035-1.2076	0.156	1.08242	0.97027-1.20754	0.016	1.1061	1.01901-1.20064	0.27	1.10089	0.93556-1.29544	0.228	1.10089	0.94908-1.27698	0.02237	0.27123	0.835	7.87339	12	0.79494	6.53147	11	0.83566
ebi-a-GCST90001484	24	0.026	0.93669	0.88786-0.9882	0.088	0.95953	0.91504-1.00618	0.016	0.95579	0.92122-0.99166	0.617	0.97486	0.88339-1.07581	0.1	0.95983	0.91589-1.00589	0.01232	0.31942	0.633	21.4602	23	0.55301	20.4225	22	0.55663
ebi-a-GCST90001664	37	0.079	0.98532	0.96968-1.0012	0.028	0.97834	0.95943-0.99762	0.017	0.98274	0.96876-0.99692	0.556	0.9914	0.96358-1.02002	0.058	0.98391	0.96804-1.00004	-0.00536	0.47589	0.64	33.6766	36	0.57959	33.1572	35	0.55729
ebi-a-GCST90001454	16	0.367	0.89609	0.71155-1.1285	0.11	0.89533	0.78168-1.02551	0.017	0.88908	0.80705-0.97945	0.148	0.84477	0.68000-1.04945	0.155	0.85547	0.69733-1.04947	-0.00142	0.94246	0.653	12.9451	15	0.60654	12.9397	14	0.53128
ebi-a-GCST90002091	19	0.06	1.06099	1.00157-1.1239	0.031	1.05759	1.00524-1.11266	0.017	1.04679	1.00806-1.08702	0.618	1.02352	0.93563-1.11968	0.036	1.05281	1.00705-1.10065	-0.0071	0.55275	0.772	14.1428	18	0.71973	13.776	17	0.68289
ebi-a-GCST90001779	21	0.077	0.96014	0.92010-1.0019	0.143	0.96282	0.91517-1.01295	0.02	0.9581	0.92425-0.99319	0.193	0.94667	0.87411-1.02525	0.06	0.9597	0.92159-0.99938	-0.00222	0.85709	0.802	15.333	20	0.75705	15.2997	19	0.70337
ebi-a-GCST90001803	14	0.207	1.55752	0.81196-2.9877	0.063	0.84767	0.71233-1.00874	0.021	0.83535	0.71682-0.97347	0.063	0.76186	0.58592-0.99063	0.05	0.79102	0.63959-0.97830	-0.0981	0.07909	0.046	24.2856	13	0.0286	18.5831	12	0.0991
ebi-a-GCST90001750	18	0.639	0.95509	0.79115-1.1530	0.162	0.93474	0.85044-1.02740	0.023	0.92365	0.86256-0.98908	0.489	0.94884	0.82036-1.09744	0.368	0.93959	0.82340-1.07219	-0.00819	0.71339	0.84	11.6444	17	0.82118	11.5046	16	0.77732
ebi-a-GCST90001995	22	0.208	0.89529	0.75800-1.0574	0.081	0.91914	0.83621-1.01030	0.024	0.91917	0.85447-0.98878	0.214	0.90191	0.77015-1.05622	0.097	0.91936	0.83613-1.01088	0.00716	0.73237	0.212	27.2182	21	0.16375	27.0555	20	0.13371
ebi-a-GCST90002002	12	0.093	1.25358	0.98791-1.5907	0.109	1.12684	0.97379-1.30396	0.024	1.16417	1.02041-1.32819	0.466	1.07672	0.88876-1.30443	0.222	1.10904	0.94830-1.29701	-0.02147	0.47739	0.143	17.7324	11	0.088	16.8161	10	0.07853
ebi-a-GCST90001802	24	0.138	0.90261	0.79219-1.0284	0.001	0.8714	0.80457-0.94378	0.024	0.92543	0.86506-0.99000	0.056	0.86644	0.75344-0.99638	0.004	0.87103	0.79986-0.94854	0.00728	0.66362	0.066	33.2422	23	0.07694	32.9511	22	0.06257
ebi-a-GCST90001835	13	0.585	0.94647	0.78146-1.1463	0.357	0.94077	0.82616-1.07128	0.024	0.87875	0.78522-0.98342	0.443	0.93165	0.78216-1.10971	0.342	0.94176	0.83631-1.06051	-0.02214	0.36695	0.167	18.316	12	0.10643	16.9517	11	0.10931
ebi-a-GCST90001886	14	0.525	0.97695	0.91116-1.0475	0.022	0.92537	0.86602-0.98879	0.027	0.94104	0.89182-0.99298	0.049	0.899	0.81673-0.98956	0.04	0.92423	0.86387-0.98881	-0.02719	0.14796	0.327	15.6392	13	0.26916	13.0405	12	0.3661
ebi-a-GCST90001992	34	0.074	0.95975	0.91875-1.0026	0.03	0.94312	0.89447-0.99442	0.027	0.96183	0.92925-0.99555	0.446	0.96408	0.87851-1.05797	0.065	0.9517	0.90456-1.00130	0.00151	0.87549	0.587	30.4024	33	0.59709	30.3774	32	0.54877
ebi-a-GCST90001548	23	0.711	0.97473	0.85288-1.1140	0.089	0.90528	0.80707-1.01545	0.027	0.9155	0.84642-0.99023	0.521	0.93311	0.75783-1.14895	0.106	0.88116	0.76075-1.02061	-0.01712	0.26834	0.566	20.0304	22	0.58114	18.7376	21	0.60197
ebi-a-GCST90001593	20	0.149	1.08429	0.97597-1.2046	0.086	1.08348	0.98871-1.18732	0.028	1.0764	1.00812-1.14930	0.475	1.05378	0.91537-1.21312	0.084	1.0829	0.99418-1.17954	-0.00246	0.86166	0.328	23.2256	19	0.22755	23.1854	18	0.18357
ebi-a-GCST90001938	14	0.331	1.09449	0.91896-1.3035	0.073	1.13135	0.98843-1.29495	0.033	1.10951	1.00859-1.22051	0.212	1.16073	0.92916-1.45001	0.183	1.14776	0.94724-1.39073	0.00349	0.85837	0.608	11.0085	13	0.61011	10.9752	12	0.53104
ebi-a-GCST90001595	7	0.304	1.37424	0.79707-2.3694	0.469	0.91136	0.70890-1.17164	0.033	0.76481	0.59781-0.97848	0.521	0.84874	0.52955-1.36031	0.763	0.95818	0.73449-1.25000	-0.10526	0.07425	0.085	12.6305	6	0.04929	6.2752	5	0.28035
ebi-a-GCST90001572	18	0.069	1.12485	0.99919-1.2663	0.021	1.14297	1.02028-1.28041	0.033	1.08646	1.00650-1.17278	0.164	1.13299	0.95761-1.34048	0.049	1.13754	1.00972-1.28153	-0.00987	0.46297	0.979	6.71312	17	0.98697	6.14761	16	0.98642
ebi-a-GCST90001766	17	0.225	1.03884	0.97926-1.1020	0.268	1.03474	0.97410-1.09915	0.034	1.04836	1.00355-1.09517	0.105	1.09479	0.98731-1.21397	0.217	1.03712	0.98100-1.09646	0.00556	0.65923	0.871	9.95858	16	0.86878	9.75618	15	0.83479
ebi-a-GCST90001893	14	0.858	1.01757	0.84430-1.2264	0.039	0.87875	0.77747-0.99323	0.035	0.9033	0.82170-0.99300	0.255	0.87491	0.70231-1.08991	0.334	0.89491	0.72047-1.11161	-0.02825	0.17231	0.843	7.95598	13	0.84646	5.84944	12	0.92348
ebi-a-GCST90001565	12	0.078	1.09324	1.00017-1.1950	0.242	1.06146	0.96052-1.17301	0.035	1.07954	1.00523-1.15933	0.404	1.06355	0.92528-1.22248	0.148	1.07194	0.98212-1.16999	-0.00664	0.65222	0.928	5.35046	11	0.91301	5.13467	10	0.882
ebi-a-GCST90002117	22	0.069	1.08107	0.99857-1.1704	0.406	1.03168	0.95849-1.11045	0.036	1.05392	1.00342-1.10696	0.975	0.99819	0.89179-1.11729	0.463	1.03051	0.95235-1.11508	-0.00956	0.4335	0.698	17.3056	21	0.69242	16.6667	20	0.6745
ebi-a-GCST90002111	15	0.862	1.01179	0.88896-1.1516	0.166	1.05791	0.97687-1.14567	0.037	1.06853	1.00416-1.13702	0.364	1.06965	0.92944-1.23100	0.533	1.03497	0.93148-1.14996	0.01854	0.36283	0.099	21.6493	14	0.08611	20.263	13	0.08884
ebi-a-GCST90001940	12	0.12	0.91417	0.82426-1.0139	0.074	0.92471	0.84852-1.00773	0.038	0.92184	0.85378-0.99532	0.124	0.84979	0.70181-1.02897	0.082	0.92516	0.85442-1.00174	0.00397	0.80755	0.447	13.5931	11	0.25633	13.5086	10	0.19661
ebi-a-GCST90001759	21	0.318	0.9766	0.93342-1.0218	0.188	0.9746	0.93796-1.01267	0.039	0.95912	0.92188-0.99787	0.586	0.97505	0.89165-1.06626	0.068	0.96735	0.93525-1.00056	-0.01558	0.1532	0.073	35.9395	20	0.01563	32.1893	19	0.02975
ebi-a-GCST90001811	15	0.043	1.14305	1.01683-1.2849	0.052	1.11301	0.99890-1.24015	0.041	1.08368	1.00342-1.17036	0.117	1.13391	0.97866-1.31380	0.114	1.1119	0.98289-1.25785	-0.01679	0.25685	0.714	11.0066	14	0.68552	9.60007	13	0.72627
ebi-a-GCST90002075	11	0.057	1.15085	1.01460-1.3054	0.049	1.12393	1.00063-1.26242	0.045	1.08454	1.00189-1.17400	0.267	1.11431	0.93045-1.33451	0.063	1.13146	1.00787-1.27019	-0.02015	0.26538	0.578	8.69729	10	0.56105	7.28688	9	0.60728
ebi-a-GCST90001666	43	0.273	0.99335	0.98171-1.0051	0.573	0.99555	0.98024-1.01111	0.047	0.98942	0.97907-0.99987	0.795	0.99718	0.97630-1.01850	0.149	0.99083	0.97871-1.00309	-0.01153	0.15218	0.482	41.5708	42	0.48967	39.4421	41	0.53996
ebi-a-GCST90001497	20	0.196	1.04272	0.98100-1.1083	0.082	1.05848	0.99289-1.12840	0.047	1.04422	1.00054-1.08982	0.36	1.04389	0.95432-1.14186	0.051	1.05791	1.00327-1.11552	0.0009	0.94909	0.589	18.0205	19	0.52107	18.0163	18	0.45458
ebi-a-GCST90001980	21	0.737	1.01619	0.92644-1.1146	0.014	1.08079	1.01589-1.14984	0.047	1.05687	1.00066-1.11624	0.116	1.09108	0.98338-1.21058	0.024	1.07872	1.01517-1.14624	0.01786	0.31574	0.186	26.8882	20	0.13844	25.465	19	0.1458
ebi-a-GCST90002003	16	0.086	0.9165	0.83556-1.0053	0.033	0.90381	0.82336-0.99213	0.049	0.93658	0.87755-0.99960	0.129	0.88127	0.75527-1.02829	0.035	0.89989	0.82319-0.98373	0.01006	0.52356	0.51	14.7485	15	0.46968	14.311	14	0.42681
ebi-a-GCST90002120	17	0.045	0.72606	0.54501-0.9673	0.2	0.92295	0.81643-1.04336	0.049	0.90323	0.81607-0.99969	0.186	0.88913	0.75266-1.05033	0.21	0.90961	0.78897-1.04870	0.04611	0.13372	0.214	20.4852	16	0.19916	17.5451	15	0.28733
ebi-a-GCST90001814	14	0.236	0.9848	0.96139-1.0088	0.345	0.98621	0.95819-1.01504	0.05	0.97841	0.95731-0.99997	0.592	0.98436	0.93049-1.04135	0.214	0.98436	0.96138-1.00789	-0.01571	0.23423	0.528	12.4869	13	0.48818	10.918	12	0.53596
ebi-a-GCST90001875	19	0.129	0.9239	0.83831-1.0182	0.009	0.91969	0.86333-0.97973	0.052	0.94377	0.89026-1.00049	0.121	0.92199	0.83612-1.01668	0.03	0.91855	0.85585-0.98584	0.00973	0.59442	0.06	30.3722	18	0.03398	29.8551	17	0.02741
ebi-a-GCST90001747	21	0.309	0.97595	0.93241-1.0215	0.119	0.96849	0.93023-1.00832	0.052	0.96292	0.92688-1.00036	0.293	0.94163	0.84416-1.05035	0.084	0.96786	0.93439-1.00252	-0.0106	0.30872	0.155	31.5481	20	0.04836	29.8306	19	0.05399
ebi-a-GCST90001758	27	0.734	0.98621	0.91120-1.0674	0.612	0.9812	0.91180-1.05589	0.055	0.94337	0.88890-1.00119	0.681	1.0402	0.86397-1.25237	0.666	0.98508	0.92091-1.05373	-0.01624	0.12003	0.133	34.5361	26	0.12205	31.293	25	0.1795
ebi-a-GCST90001428	22	0.037	0.93338	0.87873-0.9914	0.034	0.93949	0.88677-0.99534	0.055	0.95036	0.90213-1.00117	0.414	0.94786	0.83579-1.07495	0.028	0.94406	0.89996-0.99032	0.01543	0.26865	0.037	40.0258	21	0.00738	37.5924	20	0.00993
ebi-a-GCST90001984	13	0.427	1.05623	0.92739-1.2030	0.379	1.04547	0.94690-1.15430	0.056	1.06836	0.99837-1.14326	0.937	1.0052	0.88597-1.14047	0.658	1.02357	0.92548-1.13206	0.00325	0.84378	0.459	11.0847	12	0.52168	11.0438	11	0.4396
ebi-a-GCST90001738	17	0.13	1.05368	0.98837-1.1233	0.254	1.03981	0.97230-1.11200	0.057	1.05141	0.99857-1.10704	0.179	1.12782	0.95350-1.33401	0.139	1.04844	0.98789-1.11271	-0.00137	0.90677	0.52	16.8943	16	0.39247	16.8784	15	0.32619
ebi-a-GCST90001412	21	0.217	1.10232	0.94914-1.2802	0.167	1.08854	0.96512-1.22774	0.057	1.08312	0.99770-1.17584	0.886	1.01481	0.83152-1.23850	0.3	1.0759	0.94012-1.23129	-0.00398	0.78596	0.884	12.773	20	0.88691	12.6972	19	0.85371
ebi-a-GCST90001931	8	0.796	1.03845	0.78973-1.3655	0.206	0.91249	0.79184-1.05154	0.057	0.90028	0.80791-1.00320	0.352	0.89421	0.71760-1.11427	0.46	0.93269	0.78321-1.11070	-0.0317	0.3084	0.756	4.65616	7	0.70184	3.41793	6	0.75485
ebi-a-GCST90001873	15	0.753	0.98575	0.90313-1.0759	0.203	0.95735	0.89527-1.02373	0.058	0.95436	0.90930-1.00165	0.159	0.91963	0.82358-1.02688	0.478	0.97042	0.89511-1.05208	-0.01402	0.40038	0.584	12.5318	14	0.56368	11.7759	13	0.5461
ebi-a-GCST90001532	22	0.056	1.0314	1.00110-1.0626	0.418	1.01506	0.97900-1.05245	0.059	1.02393	0.99907-1.04940	0.61	0.98376	0.92456-1.04674	0.216	1.01972	0.98961-1.05074	-0.00793	0.40859	0.501	20.4138	21	0.4952	19.7013	20	0.47675
ebi-a-GCST90001491	21	0.391	0.97951	0.93528-1.0258	0.362	0.98086	0.94094-1.02246	0.061	0.97018	0.93993-1.00141	0.599	0.98306	0.92326-1.04672	0.165	0.97465	0.94122-1.00927	-0.00752	0.57782	0.354	22.7789	20	0.29978	22.4008	19	0.26477
ebi-a-GCST90001788	15	0.052	0.84741	0.72830-0.9860	0.164	0.90464	0.78553-1.04181	0.061	0.91422	0.83221-1.00431	0.564	1.07503	0.84574-1.36648	0.141	0.89511	0.77866-1.02896	0.01838	0.23268	0.739	10.8046	14	0.70132	9.23743	13	0.75478
ebi-a-GCST90001898	23	0.094	0.93982	0.87690-1.0072	0.139	0.95313	0.89434-1.01578	0.062	0.95634	0.91255-1.00223	0.712	0.98291	0.89816-1.07566	0.182	0.95217	0.88801-1.02098	0.00706	0.51036	0.574	21.4643	22	0.49222	21.0155	21	0.458
ebi-a-GCST90001587	20	0.073	1.20684	0.99430-1.4648	0.132	1.09719	0.97238-1.23803	0.064	1.10423	0.99410-1.22655	0.522	1.07123	0.87111-1.31732	0.402	1.06703	0.91986-1.23773	-0.02018	0.29943	0.073	29.6752	19	0.05608	27.9054	18	0.06351
ebi-a-GCST90002080	18	0.07	1.08955	0.99924-1.1880	0.245	1.05817	0.96200-1.16395	0.066	1.06312	0.99599-1.13477	0.533	1.06212	0.88230-1.27859	0.074	1.08544	0.99762-1.18099	-0.00995	0.40483	0.459	17.4101	17	0.42693	16.6484	16	0.4087
ebi-a-GCST90002033	22	0.131	0.93698	0.86408-1.0160	0.161	0.93771	0.85700-1.02603	0.068	0.94953	0.89821-1.00379	0.94	0.99409	0.85385-1.15738	0.285	0.94922	0.86487-1.04180	0.00553	0.66275	0.791	16.1522	21	0.76104	15.9563	20	0.71933
ebi-a-GCST90001650	17	0.231	1.06604	0.96413-1.1787	0.249	1.05365	0.96399-1.15165	0.068	1.06342	0.99542-1.13607	0.804	0.98182	0.85114-1.13255	0.363	1.04432	0.95365-1.14361	-0.00082	0.95007	0.776	12.2904	16	0.72376	12.2863	15	0.65724
ebi-a-GCST90002025	17	0.056	1.11567	1.00597-1.2373	0.127	1.06998	0.98092-1.16712	0.068	1.06854	0.99502-1.14750	0.899	1.00921	0.87795-1.16010	0.132	1.06596	0.98506-1.15351	-0.01581	0.28053	0.11	25.9455	16	0.0548	23.9449	15	0.06604
ebi-a-GCST90001540	22	0.162	1.17147	0.94591-1.4508	0.139	1.09625	0.97050-1.23830	0.073	1.09248	0.99168-1.20351	0.926	1.01281	0.77696-1.32024	0.611	1.06012	0.84920-1.32342	-0.01547	0.48005	0.041	33.0042	21	0.04617	32.1711	20	0.04151
ebi-a-GCST90002036	25	0.202	0.96797	0.92208-1.0162	0.67	0.98741	0.93153-1.04665	0.076	0.96751	0.93280-1.00351	0.77	0.98687	0.90416-1.07714	0.623	0.98483	0.92730-1.04594	-0.0003	0.97695	0.666	18.7489	24	0.76524	18.748	23	0.71575
ebi-a-GCST90001823	15	0.585	0.97001	0.87198-1.0791	0.129	0.9519	0.89322-1.01443	0.079	0.95373	0.90459-1.00553	0.162	0.90687	0.79652-1.03250	0.145	0.95039	0.89091-1.01383	-0.00713	0.72255	0.458	14.6893	14	0.39972	14.542	13	0.33681
ebi-a-GCST90001808	27	0.49	0.95763	0.84848-1.0808	0.001	0.88899	0.82696-0.95567	0.082	0.9495	0.89560-1.00664	0.44	0.94171	0.81034-1.09438	0.014	0.90075	0.83343-0.97350	-0.0029	0.87518	0.171	32.2253	26	0.18578	32.1929	25	0.15251
ebi-a-GCST90001706	22	0.234	1.09296	0.94844-1.2595	0.197	1.05939	0.97052-1.15640	0.083	1.0636	0.99195-1.14041	0.434	0.94222	0.81402-1.09061	0.791	0.98058	0.85005-1.13116	-0.00953	0.66819	0.033	34.1686	21	0.03476	33.8483	20	0.02717
ebi-a-GCST90001424	14	0.016	1.06789	1.01977-1.1183	0.043	1.05452	1.00163-1.11020	0.084	1.03974	0.99471-1.08681	0.821	0.98685	0.88174-1.10449	0.05	1.05237	1.00484-1.10214	-0.02421	0.05267	0.321	17.0234	13	0.19824	12.2902	12	0.42267
ebi-a-GCST90001780	24	0.034	1.03673	1.00488-1.0696	0.114	1.0312	0.99262-1.07127	0.085	1.02497	0.99659-1.05415	0.819	1.01079	0.92314-1.10676	0.074	1.0292	0.99864-1.06069	-0.01628	0.15017	0.373	27.0904	23	0.25214	24.6043	22	0.31637
ebi-a-GCST90001562	30	0.25	1.01532	0.98989-1.0414	0.266	1.0157	0.98822-1.04395	0.086	1.0199	0.99720-1.04311	0.499	1.01956	0.96461-1.07763	0.073	1.01956	0.99896-1.04057	0.00799	0.44478	0.204	36.9354	29	0.14788	36.1595	28	0.13858
ebi-a-GCST90001569	19	0.231	1.09829	0.94720-1.2735	0.162	1.08517	0.96764-1.21696	0.086	1.07534	0.98966-1.16844	0.449	1.07028	0.90123-1.27105	0.267	1.07737	0.94833-1.22397	-0.00539	0.73968	0.643	15.7876	18	0.60736	15.6736	17	0.54708
ebi-a-GCST90001543	24	0.948	1.00202	0.94367-1.0640	0.58	0.9818	0.92000-1.04775	0.087	0.95906	0.91418-1.00614	0.125	0.91309	0.81639-1.02126	0.628	0.98555	0.92994-1.04449	-0.02337	0.03536	0.395	24.7726	23	0.36212	19.7451	22	0.59898
ebi-a-GCST90001896	12	0.939	0.99503	0.87825-1.1273	0.154	0.93255	0.84711-1.02661	0.088	0.94109	0.87768-1.00908	0.579	0.95587	0.81894-1.11569	0.425	0.95754	0.86404-1.06115	-0.0201	0.31623	0.647	8.54194	11	0.66409	7.42883	10	0.68443
ebi-a-GCST90001418	24	0.516	1.01333	0.97429-1.0539	0.294	1.02313	0.98038-1.06773	0.09	1.02994	0.99539-1.06569	0.145	1.11483	0.96806-1.28385	0.214	1.02353	0.98768-1.06069	0.01569	0.11574	0.655	19.6773	23	0.66129	16.9957	22	0.7636
ebi-a-GCST90001897	17	0.599	0.98802	0.94554-1.0324	0.529	0.98371	0.93472-1.03527	0.09	0.96885	0.93400-1.00500	0.026	0.85301	0.75136-0.96841	0.56	0.98709	0.94571-1.03027	-0.01744	0.13446	0.472	15.3349	16	0.50026	12.8316	15	0.6153
ebi-a-GCST90001988	19	0.345	1.05635	0.94580-1.1798	0.239	1.0428	0.97246-1.11823	0.091	1.05081	0.99217-1.11292	0.073	1.14603	0.99602-1.31863	0.115	1.04829	0.99132-1.10853	-0.0022	0.91347	0.202	24.6193	18	0.13577	24.6016	17	0.10399
ebi-a-GCST90001710	19	0.131	0.9516	0.89500-1.0118	0.02	0.93801	0.88867-0.99008	0.091	0.96049	0.91659-1.00650	0.902	1.00878	0.87893-1.15781	0.066	0.94503	0.89311-0.99998	0.00593	0.64097	0.368	18.9829	18	0.39288	18.7345	17	0.34399
ebi-a-GCST90001967	17	0.642	0.97787	0.89145-1.0727	0.233	0.95453	0.88419-1.03046	0.092	0.94276	0.88030-1.00965	0.483	0.95421	0.83966-1.08438	0.235	0.95805	0.89505-1.02549	-0.0196	0.27195	0.173	23.4442	16	0.10237	21.5733	15	0.11949
ebi-a-GCST90001991	19	0.353	1.05747	0.94293-1.1859	0.247	1.0431	0.97113-1.12040	0.092	1.05167	0.99174-1.11524	0.418	1.05753	0.92658-1.20698	0.114	1.05279	0.99086-1.11860	-0.00222	0.91324	0.187	24.6628	18	0.13449	24.6451	17	0.10294
ebi-a-GCST90002086	21	0.031	0.89183	0.81004-0.9819	0.025	0.90291	0.82552-0.98755	0.094	0.94705	0.88859-1.00936	0.45	0.94099	0.80616-1.09837	0.05	0.90696	0.82747-0.99409	0.01969	0.11873	0.741	14.1797	20	0.82127	11.51	19	0.90549
ebi-a-GCST90001699	25	0.098	1.00149	0.99979-1.0032	0.163	1.00151	0.99939-1.00364	0.097	1.00126	0.99977-1.00274	0.734	1.00061	0.99714-1.00410	0.165	1.00114	0.99958-1.00269	-0.00586	0.564	0.456	24.5027	24	0.43317	24.143	23	0.39592
ebi-a-GCST90001752	21	0.283	0.95041	0.86841-1.0401	0.202	0.94638	0.86951-1.03006	0.099	0.95124	0.89634-1.00950	0.851	0.986	0.85280-1.14001	0.253	0.95419	0.88260-1.03160	0.00031	0.97963	0.327	23.704	20	0.25556	23.7031	19	0.20779
ebi-a-GCST90001575	28	0.34	1.03734	0.96344-1.1169	0.124	1.05682	0.98487-1.13402	0.1	1.04492	0.99158-1.10114	0.199	1.08571	0.96060-1.22712	0.246	1.04229	0.97326-1.11622	0.00277	0.78263	0.417	29.0733	27	0.35735	28.9867	26	0.31169
ebi-a-GCST90001804	26	0.057	0.91136	0.83208-0.9982	0.004	0.89819	0.83525-0.96586	0.102	0.95792	0.90987-1.00850	0.341	0.92346	0.78623-1.08464	0.014	0.90326	0.83748-0.97420	0.01563	0.20557	0.499	22.2671	25	0.62028	20.5741	24	0.6637
ebi-a-GCST90001792	15	0.078	1.03671	0.99907-1.0758	0.116	1.03458	0.99161-1.07942	0.104	1.02714	0.99448-1.06088	0.79	1.01277	0.92425-1.10977	0.115	1.03331	0.99457-1.07356	-0.00982	0.33061	0.654	12.1198	14	0.59668	11.0983	13	0.60259
ebi-a-GCST90001439	13	0.832	1.02685	0.80905-1.3033	0.34	1.07209	0.92927-1.23686	0.104	1.08904	0.98252-1.20712	0.809	1.02634	0.83485-1.26176	0.522	1.05558	0.89892-1.23955	0.01178	0.60262	0.749	8.56765	12	0.73935	8.28035	11	0.68799
ebi-a-GCST90001884	26	0.778	0.98433	0.88304-1.0972	0.727	1.01323	0.94109-1.09091	0.105	1.04417	0.99098-1.10021	0.432	1.04692	0.93553-1.17157	0.738	1.01279	0.94092-1.09015	0.02269	0.23603	0.702	21.1558	25	0.68389	19.6786	24	0.7149
ebi-a-GCST90001778	22	0.053	1.04498	1.00213-1.0897	0.15	1.03373	0.98808-1.08148	0.105	1.02946	0.99390-1.06630	0.529	1.03177	0.93750-1.13551	0.138	1.03177	0.99160-1.07356	-0.01379	0.22528	0.288	27.0541	21	0.16907	25.09	20	0.19801
ebi-a-GCST90001869	34	0.135	1.06471	0.98270-1.1536	0.65	1.01714	0.94515-1.09461	0.106	1.04219	0.99130-1.09569	0.797	0.98338	0.86657-1.11594	0.567	1.02428	0.94422-1.11114	-0.00736	0.50583	0.474	33.5164	33	0.44224	33.0487	32	0.4157
ebi-a-GCST90001471	18	0.424	1.02999	0.95980-1.1053	0.286	1.03881	0.96857-1.11415	0.107	1.04298	0.99101-1.09769	0.258	1.0609	0.96088-1.17134	0.217	1.04256	0.97814-1.11121	0.00622	0.62059	0.928	10.6489	17	0.87422	10.3941	16	0.84526
ebi-a-GCST90001429	22	0.023	1.1116	1.02215-1.2089	0.055	1.08452	0.99825-1.17825	0.107	1.04878	0.98970-1.11138	0.527	1.05801	0.89089-1.25649	0.042	1.10097	1.00925-1.20103	-0.0223	0.07472	0.639	16.5433	21	0.73839	13.0079	20	0.87705
ebi-a-GCST90001657	11	0.153	1.16452	0.96177-1.4100	0.277	1.09813	0.92757-1.30005	0.108	1.10519	0.97836-1.24847	0.316	1.13109	0.89992-1.42163	0.233	1.11532	0.94227-1.32016	-0.01421	0.50448	0.972	3.62411	10	0.96272	3.1408	9	0.95845
ebi-a-GCST90001531	22	0.164	1.02837	0.99004-1.0682	0.235	1.02155	0.98626-1.05811	0.108	1.02525	0.99452-1.05693	0.913	1.00406	0.93442-1.07890	0.127	1.02469	0.99428-1.05603	-0.0036	0.78753	0.077	31.9671	21	0.059	31.8482	20	0.04494
ebi-a-GCST90002116	20	0.197	0.94	0.85858-1.0291	0.025	0.92928	0.87154-0.99083	0.109	0.95817	0.90941-1.00954	0.829	0.9861	0.86998-1.11773	0.101	0.94766	0.89142-1.00746	0.00865	0.61494	0.129	26.7096	19	0.1116	26.3263	18	0.09253
ebi-a-GCST90001639	14	0.345	0.90308	0.73707-1.1065	0.757	1.02377	0.88246-1.18770	0.109	1.10385	0.97829-1.24553	0.939	0.99066	0.78121-1.25628	0.996	0.9995	0.84166-1.18694	0.04122	0.04288	0.109	19.5393	13	0.10731	13.69	12	0.32094
ebi-a-GCST90001944	16	0.623	1.009	0.97439-1.0448	0.175	1.02815	0.98769-1.07027	0.11	1.02646	0.99411-1.05987	0.201	1.05125	0.97695-1.13121	0.143	1.02906	0.99238-1.06710	0.02327	0.08675	0.203	20.9216	15	0.13935	16.8402	14	0.26479
ebi-a-GCST90001945	16	0.624	1.00896	0.97437-1.0448	0.19	1.02799	0.98638-1.07135	0.11	1.02642	0.99407-1.05983	0.18	1.05045	0.98089-1.12495	0.095	1.02991	0.99709-1.06380	0.02329	0.08655	0.177	20.9305	15	0.13906	16.8427	14	0.26466
ebi-a-GCST90001762	17	0.71	0.98924	0.93542-1.0462	0.209	0.97382	0.93431-1.01500	0.113	0.96185	0.91666-1.00928	0.323	0.92444	0.79490-1.07509	0.18	0.97282	0.93610-1.01099	-0.02095	0.11093	0.164	32.3783	16	0.00892	27.1789	15	0.02731
ebi-a-GCST90001674	13	0.394	1.03122	0.96346-1.1037	0.347	1.03407	0.96439-1.10880	0.116	1.0434	0.98963-1.10009	0.252	1.09616	0.94406-1.27277	0.324	1.03468	0.96956-1.10416	0.00687	0.60007	0.717	9.66859	12	0.64501	9.37717	11	0.58712
ebi-a-GCST90001579	16	0.141	1.05071	0.98741-1.1181	0.199	1.04767	0.97586-1.12477	0.118	1.04018	0.99005-1.09285	0.912	1.00758	0.88273-1.15008	0.161	1.04727	0.98491-1.11357	-0.00679	0.60857	0.955	7.35512	15	0.94704	7.08069	14	0.93156
ebi-a-GCST90001592	20	0.125	1.03434	0.99261-1.0778	0.221	1.02839	0.98332-1.07552	0.118	1.02834	0.99293-1.06501	0.907	1.00749	0.89016-1.14029	0.253	1.02545	0.98351-1.06919	-0.0044	0.60446	0.671	17.7785	19	0.53728	17.5005	18	0.48899
ebi-a-GCST90001529	14	0.433	0.94967	0.83818-1.0760	0.801	0.98742	0.89489-1.08952	0.118	0.94374	0.87759-1.01488	0.736	0.97104	0.82153-1.14775	0.791	0.98167	0.85876-1.12217	-0.00236	0.90376	0.199	16.5855	13	0.21895	16.5644	12	0.16673
ebi-a-GCST90001608	20	0.411	0.92567	0.77344-1.1079	0.882	0.9912	0.88184-1.11413	0.119	0.9369	0.86318-1.01693	0.879	1.01219	0.86766-1.18079	0.976	1.00192	0.88422-1.13529	0.00301	0.88408	0.673	15.8091	19	0.66998	15.7872	18	0.6074
ebi-a-GCST90001966	19	0.98	1.00113	0.91590-1.0943	0.567	1.02316	0.94602-1.10659	0.119	1.0486	0.98782-1.11312	0.205	1.07976	0.96318-1.21045	0.426	1.03139	0.95742-1.11108	0.01912	0.19403	0.271	21.8086	18	0.2406	19.6907	17	0.29036
ebi-a-GCST90001612	16	0.235	1.05781	0.96805-1.1559	0.321	1.04922	0.95430-1.15358	0.12	1.05181	0.98691-1.12099	0.236	1.09576	0.94769-1.26697	0.303	1.04588	0.96308-1.13580	-0.00274	0.85916	0.963	7.02143	15	0.95705	6.98876	14	0.93514
ebi-a-GCST90001636	7	0.856	0.94189	0.50996-1.7396	0.375	1.09292	0.89821-1.32985	0.121	1.12062	0.97022-1.29434	0.839	0.9689	0.72313-1.29820	0.307	1.14965	0.90014-1.46833	0.02731	0.59135	0.465	6.03135	6	0.41969	5.6595	5	0.34077
ebi-a-GCST90001915	13	0.041	1.14139	1.02026-1.2769	0.024	1.09846	1.01239-1.19185	0.124	1.07441	0.98044-1.17740	0.305	1.06394	0.94988-1.19170	0.025	1.10407	1.02357-1.19091	-0.03438	0.12975	0.011	29.4989	12	0.00332	23.7164	11	0.01398
ebi-a-GCST90001902	16	0.155	0.92761	0.84109-1.0230	0.046	0.91601	0.84047-0.99834	0.126	0.94767	0.88461-1.01522	0.346	1.09581	0.91140-1.31752	0.046	0.90913	0.83441-0.99055	0.00874	0.54821	0.153	21.5997	15	0.11874	21.0309	14	0.10084
ebi-a-GCST90001939	15	0.054	0.81612	0.67630-0.9848	0.299	0.92656	0.80226-1.07012	0.126	0.92566	0.83839-1.02202	0.378	0.90349	0.72607-1.12425	0.297	0.90653	0.75898-1.08276	0.03307	0.14616	0.542	13.3433	14	0.49968	10.954	13	0.61467
ebi-a-GCST90001998	27	0.096	0.94554	0.88739-1.0075	0.184	0.95876	0.90096-1.02028	0.129	0.9648	0.92121-1.01046	0.199	0.93733	0.85126-1.03209	0.103	0.94943	0.89389-1.00842	0.00906	0.37014	0.494	26.6393	26	0.42843	25.7803	25	0.41939
ebi-a-GCST90001577	24	0.269	1.07659	0.94771-1.2230	0.257	1.06109	0.95775-1.17558	0.131	1.06802	0.98058-1.16327	0.435	1.07124	0.90400-1.26941	0.229	1.05824	0.96730-1.15774	-0.00235	0.8677	0.071	36.1735	23	0.0396	36.1268	22	0.02943
ebi-a-GCST90002021	15	0.297	0.91591	0.78176-1.0731	0.342	0.95929	0.88053-1.04509	0.133	0.95162	0.89202-1.01519	0.444	0.94315	0.81534-1.09099	0.199	0.91911	0.81300-1.03907	0.01232	0.6108	0.284	16.8241	14	0.26567	16.4794	13	0.22421
ebi-a-GCST90001798	24	0.862	1.01059	0.89887-1.1362	0.002	0.89059	0.82652-0.95964	0.136	0.95513	0.89915-1.01459	0.202	0.89958	0.76825-1.05336	0.019	0.89958	0.82856-0.97669	-0.02276	0.28318	0.091	32.503	23	0.09013	30.8082	22	0.10011
ebi-a-GCST90001729	19	0.816	1.01628	0.88897-1.1618	0.099	1.09245	0.98348-1.21349	0.137	1.06835	0.97925-1.16557	0.265	1.10818	0.93010-1.32034	0.122	1.09351	0.98157-1.21822	0.01752	0.34812	0.112	27.3159	18	0.07326	25.8975	17	0.07635
ebi-a-GCST90001549	28	0.643	0.96637	0.83749-1.1151	0.188	0.93396	0.84369-1.03388	0.138	0.94758	0.88254-1.01742	0.182	0.88164	0.73609-1.05596	0.199	0.90166	0.77280-1.05199	-0.00458	0.75919	0.941	17.0994	27	0.92864	17.0035	26	0.90898
ebi-a-GCST90002029	17	0.667	1.03646	0.88328-1.2162	0.128	1.07662	0.97887-1.18413	0.138	1.05757	0.98217-1.13876	0.328	1.07279	0.93595-1.22964	0.292	1.0594	0.95500-1.17522	0.00522	0.78248	0.422	17.3786	16	0.36152	17.2875	15	0.30197
ebi-a-GCST90002069	17	0.079	0.9481	0.89704-1.0021	0.126	0.9552	0.90075-1.01293	0.139	0.96841	0.92813-1.01044	0.542	1.0401	0.91916-1.17694	0.122	0.95667	0.90709-1.00896	0.01334	0.26	0.859	8.69148	16	0.92557	7.32103	15	0.94812
ebi-a-GCST90001615	18	0.308	1.0695	0.94380-1.2119	0.141	1.0853	0.97315-1.21037	0.139	1.05929	0.98147-1.14327	0.518	1.06628	0.88132-1.29006	0.166	1.08367	0.97204-1.20812	-0.00293	0.84909	0.415	18.6117	17	0.35127	18.5683	16	0.29169
ebi-a-GCST90001426	20	0.574	0.98332	0.92834-1.0416	0.598	0.98278	0.92127-1.04840	0.139	0.96547	0.92156-1.01148	0.255	1.06337	0.95967-1.17827	0.505	0.98152	0.93006-1.03583	-0.01073	0.30516	0.416	20.3583	19	0.37332	19.1717	18	0.38133
ebi-a-GCST90001668	24	0.649	1.00999	0.96823-1.0535	0.667	1.01087	0.96236-1.06182	0.142	1.0264	0.99133-1.06272	0.544	1.02237	0.95287-1.09692	0.636	1.0113	0.96596-1.05876	0.01247	0.20329	0.514	23.1352	23	0.4529	21.4158	22	0.49518
ebi-a-GCST90001649	19	0.285	1.05653	0.95816-1.1650	0.268	1.04824	0.96443-1.13934	0.143	1.04629	0.98482-1.11161	0.938	1.00461	0.89616-1.12618	0.274	1.05032	0.96444-1.14384	-0.00312	0.80606	0.587	17.1889	18	0.51016	17.1262	17	0.44585
ebi-a-GCST90001680	19	0.049	1.13647	1.00956-1.2793	0.027	1.12871	1.01420-1.25615	0.143	1.0595	0.98064-1.14469	0.615	1.0484	0.87483-1.25640	0.039	1.11655	1.01345-1.23013	-0.02088	0.15262	0.23	21.6552	18	0.24765	19.1317	17	0.32102
ebi-a-GCST90001918	16	0.259	1.06033	0.96167-1.1691	0.036	1.07763	1.00479-1.15575	0.143	1.05305	0.98266-1.12849	0.203	0.90158	0.77392-1.05031	0.071	1.06478	0.99934-1.13450	-0.00437	0.84207	0.061	27.3041	15	0.02635	27.224	14	0.018
ebi-a-GCST90001392	27	0.134	1.0229	0.99397-1.0527	0.454	1.01281	0.97960-1.04714	0.143	1.0197	0.99342-1.04668	0.981	0.99864	0.89333-1.11637	0.283	1.01669	0.98706-1.04722	-0.00486	0.61016	0.689	22.4401	26	0.66439	22.1735	25	0.6257
ebi-a-GCST90001443	13	0.405	0.97072	0.90761-1.0382	0.273	0.96965	0.91772-1.02452	0.148	0.96233	0.91356-1.01371	0.911	0.98984	0.82981-1.18072	0.236	0.96878	0.92172-1.01823	-0.00664	0.68017	0.448	15.6648	12	0.20708	15.4136	11	0.16433
ebi-a-GCST90001539	22	0.159	1.09534	0.96948-1.2375	0.171	1.0733	0.96999-1.18761	0.148	1.05794	0.98022-1.14182	0.583	0.95358	0.80682-1.12704	0.074	1.08038	0.99668-1.17111	-0.00945	0.47974	0.122	30.7202	21	0.07844	29.9436	20	0.07077
ebi-a-GCST90001437	19	0.204	0.86824	0.70407-1.0707	0.321	0.93983	0.83144-1.06235	0.15	0.93605	0.85545-1.02424	0.486	0.9346	0.77570-1.12605	0.315	0.91668	0.77731-1.08103	0.01647	0.44666	0.48	17.6674	18	0.47776	17.0584	17	0.45042
ebi-a-GCST90001950	19	0.049	0.90877	0.83190-0.9927	0.327	0.97461	0.92577-1.02604	0.151	0.96448	0.91804-1.01327	0.071	0.90087	0.80973-1.00226	0.435	0.97757	0.92460-1.03357	0.02964	0.13611	0.045	31.8103	18	0.02315	27.8065	17	0.04725
ebi-a-GCST90001496	25	0.217	1.03558	0.98119-1.0930	0.045	1.05498	1.00120-1.11165	0.151	1.02827	0.98988-1.06815	0.409	1.03433	0.95604-1.11904	0.057	1.05152	1.00107-1.10451	-0.00413	0.72006	0.702	20.2881	24	0.68028	20.1564	23	0.63246
ebi-a-GCST90001482	31	0.315	1.01736	0.98434-1.0515	0.2	1.0242	0.98739-1.06238	0.153	1.01923	0.99293-1.04623	0.457	1.02557	0.96032-1.09526	0.134	1.02265	0.99394-1.05219	0.00212	0.85513	0.473	30.6541	30	0.43255	30.6183	29	0.38364
ebi-a-GCST90002014	14	0.485	0.94453	0.80871-1.1032	0.408	0.95857	0.86714-1.05965	0.155	0.94912	0.88318-1.01998	0.454	0.93279	0.78167-1.11312	0.679	0.97004	0.84246-1.11694	0.00135	0.94613	0.614	10.4324	13	0.65825	10.4276	12	0.5785
ebi-a-GCST90001554	22	0.183	0.97232	0.93434-1.0118	0.194	0.96958	0.92539-1.01587	0.159	0.97595	0.94348-1.00954	0.824	1.01373	0.90048-1.14121	0.181	0.96983	0.92868-1.01280	0.00285	0.73209	0.698	15.3738	21	0.80374	15.2533	20	0.76173
ebi-a-GCST90001677	19	0.449	1.04616	0.93334-1.1726	0.302	1.0555	0.95258-1.16953	0.16	1.05524	0.97905-1.13736	0.616	1.03952	0.89584-1.20624	0.353	1.05446	0.94559-1.17586	0.00241	0.84632	0.933	10.4156	18	0.91749	10.3768	17	0.88707
ebi-a-GCST90001836	21	0.457	1.03082	0.95318-1.1148	0.092	1.0664	0.98955-1.14922	0.164	1.03686	0.98538-1.09104	0.433	1.05374	0.92687-1.19797	0.093	1.06372	0.99323-1.13923	0.0032	0.84632	0.23	24.8593	20	0.20686	24.8089	19	0.16693
ebi-a-GCST90002026	20	0.197	0.92736	0.83050-1.0355	0.123	0.93074	0.84951-1.01973	0.164	0.95575	0.89672-1.01867	0.187	0.90607	0.78660-1.04367	0.08	0.91138	0.82606-1.00551	0.00929	0.51667	0.252	22.8827	19	0.24255	22.3396	18	0.21725
ebi-a-GCST90001882	17	0.126	1.04284	0.99127-1.0971	0.123	1.03171	0.99158-1.07347	0.165	1.02301	0.99066-1.05642	0.082	1.0696	0.99632-1.14826	0.064	1.03625	1.00054-1.07323	-0.01276	0.35207	0.363	19.6636	16	0.23576	18.5244	15	0.2361
ebi-a-GCST90002109	15	0.463	1.06175	0.90890-1.2403	0.195	1.05591	0.97250-1.14648	0.169	1.04509	0.98142-1.11289	0.52	1.04437	0.91811-1.18799	0.278	1.05379	0.96208-1.15423	-0.00502	0.82955	0.28	17.2882	14	0.24115	17.2243	13	0.18925
ebi-a-GCST90001754	15	0.721	1.04351	0.83040-1.3113	0.032	0.87155	0.76854-0.98837	0.169	0.93057	0.83983-1.03110	0.292	0.87425	0.68728-1.11208	0.206	0.85503	0.67834-1.07775	-0.02545	0.2921	0.049	23.082	14	0.05895	21.1229	13	0.07053
ebi-a-GCST90001671	21	0.175	0.95142	0.88775-1.0197	0.058	0.942	0.88562-1.00197	0.171	0.96617	0.91967-1.01502	0.818	0.98875	0.89908-1.08736	0.095	0.94223	0.88161-1.00703	0.00866	0.54254	0.985	9.42297	20	0.97747	9.03841	19	0.97284
ebi-a-GCST90001911	26	0.784	0.98903	0.91489-1.0692	0.48	0.97316	0.90244-1.04942	0.173	0.96365	0.91370-1.01633	0.275	0.92703	0.81153-1.05897	0.403	0.97026	0.90501-1.04021	-0.00931	0.37951	0.674	22.4267	25	0.611	21.6251	24	0.60163
ebi-a-GCST90001455	8	0.439	0.78916	0.45101-1.3808	0.186	0.8713	0.71040-1.06865	0.175	0.88813	0.74816-1.05428	0.23	0.76973	0.52101-1.13719	0.076	0.75251	0.57572-0.98359	0.02193	0.67683	0.112	11.4987	7	0.1183	11.1427	6	0.08406
ebi-a-GCST90001561	24	0.29	1.01836	0.98539-1.0524	0.081	1.03288	0.99601-1.07113	0.177	1.01953	0.99131-1.04856	0.206	1.0556	0.97296-1.14526	0.078	1.02923	0.99820-1.06124	0.0017	0.89034	0.383	24.8585	23	0.35762	24.8365	22	0.30496
ebi-a-GCST90001728	17	0.06	1.05187	1.00186-1.1044	0.253	1.02743	0.98086-1.07621	0.179	1.02271	0.98975-1.05677	0.306	1.03787	0.96873-1.11194	0.219	1.02727	0.98577-1.07052	-0.02737	0.14728	0.759	11.9416	16	0.74799	9.60631	15	0.84375
ebi-a-GCST90001542	19	0.106	0.96473	0.92575-1.0053	0.158	0.96902	0.92761-1.01228	0.18	0.97824	0.94726-1.01024	0.928	1.0042	0.91763-1.09893	0.132	0.97099	0.93613-1.00715	0.01763	0.30524	0.515	15.6486	18	0.61706	14.531	17	0.62922
ebi-a-GCST90001771	26	0.315	1.02802	0.97519-1.0837	0.701	1.0112	0.95537-1.07030	0.185	1.02759	0.98707-1.06977	0.567	1.02952	0.93317-1.13583	0.376	1.02437	0.97208-1.07947	-0.00024	0.98085	0.6	23.4752	25	0.54983	23.4747	24	0.49194
ebi-a-GCST90001979	17	0.467	1.02634	0.95861-1.0989	0.19	1.03797	0.98175-1.09742	0.185	1.03194	0.98503-1.08109	0.795	1.01308	0.92004-1.11553	0.19	1.03957	0.98340-1.09895	0.0034	0.8292	0.321	19.4093	16	0.24801	19.3471	15	0.19843
ebi-a-GCST90001421	14	0.476	0.97889	0.92478-1.0362	0.264	0.96948	0.91820-1.02362	0.187	0.9688	0.92424-1.01552	0.813	0.97938	0.82664-1.16034	0.285	0.9702	0.91995-1.02320	-0.0068	0.53613	0.973	6.27632	13	0.93552	5.87063	12	0.92246
ebi-a-GCST90001800	28	0.859	1.00611	0.94131-1.0754	0.521	0.97931	0.91880-1.04380	0.188	0.96605	0.91766-1.01699	0.203	0.908	0.78558-1.04951	0.51	0.97987	0.92312-1.04010	-0.01941	0.08585	0.013	46.0295	27	0.01263	41.0018	26	0.03102
ebi-a-GCST90002097	15	0.289	1.07543	0.94543-1.2233	0.177	1.05267	0.97708-1.13412	0.189	1.03821	0.98177-1.09789	0.833	1.01283	0.90144-1.13798	0.212	1.05149	0.97533-1.13361	-0.0145	0.56223	0.642	11.9584	14	0.60965	11.6047	13	0.5603
ebi-a-GCST90001538	29	0.371	1.01069	0.98781-1.0341	0.47	1.00891	0.98492-1.03349	0.192	1.01387	0.99311-1.03506	0.818	1.01045	0.92542-1.10330	0.315	1.01045	0.99051-1.03079	0.00564	0.51538	0.355	35.0334	28	0.1689	34.4786	27	0.15257
ebi-a-GCST90001589	12	0.474	0.9343	0.78121-1.1174	0.173	0.92384	0.82428-1.03543	0.196	0.94013	0.85622-1.03226	0.868	0.982	0.79610-1.21132	0.26	0.90354	0.76430-1.06814	0.00141	0.93789	0.926	4.76904	11	0.94183	4.76266	10	0.90646
ebi-a-GCST90001974	17	0.402	1.03867	0.95279-1.1323	0.249	1.05533	0.96306-1.15645	0.196	1.04304	0.97853-1.11181	0.654	1.03904	0.88168-1.22448	0.279	1.04764	0.96577-1.13646	0.00166	0.88588	0.551	15.6849	16	0.47516	15.6626	15	0.40482
ebi-a-GCST90001667	28	0.041	1.02314	1.00207-1.0447	0.593	1.00782	0.97946-1.03699	0.197	1.01218	0.99372-1.03098	0.776	1.00764	0.95674-1.06126	0.267	1.01339	0.99033-1.03700	-0.01928	0.03904	0.541	24.8142	27	0.58488	20.0902	26	0.78727
ebi-a-GCST90001828	27	0.264	0.94154	0.84904-1.0441	0.225	0.95302	0.88169-1.03013	0.198	0.96111	0.90473-1.02101	0.965	1.00316	0.87103-1.15535	0.318	0.96004	0.88755-1.03845	0.00593	0.63234	0.243	31.9418	26	0.19505	31.6448	25	0.16855
ebi-a-GCST90002043	15	0.039	0.90532	0.83168-0.9855	0.066	0.93006	0.86089-1.00479	0.199	0.96095	0.90424-1.02122	0.823	1.01677	0.88117-1.17325	0.256	0.95025	0.87330-1.03397	0.02362	0.08878	0.185	18.8858	14	0.16936	14.9851	13	0.30828
ebi-a-GCST90001772	22	0.416	1.01893	0.97487-1.0650	0.506	1.01753	0.96672-1.07102	0.201	1.02345	0.98776-1.06043	0.149	1.0631	0.98121-1.15184	0.313	1.0229	0.97995-1.06773	0.00326	0.74503	0.728	17.0035	21	0.7109	16.8947	20	0.6598
ebi-a-GCST90001791	22	0.207	0.93917	0.85465-1.0321	0.377	0.95693	0.86784-1.05516	0.201	0.95863	0.89852-1.02276	0.741	0.97619	0.84785-1.12395	0.382	0.95682	0.86853-1.05408	0.00684	0.56423	0.867	14.3069	21	0.85606	13.9631	20	0.83236
ebi-a-GCST90001580	18	0.134	1.09263	0.97893-1.2195	0.118	1.07351	0.98222-1.17327	0.203	1.05017	0.97398-1.13231	0.21	1.1217	0.94368-1.33331	0.128	1.07338	0.98416-1.17070	-0.0161	0.34538	0.236	22.3375	17	0.17208	21.0914	16	0.17502
ebi-a-GCST90001451	18	0.672	1.03891	0.87321-1.2361	0.082	1.0885	0.98929-1.19767	0.207	1.04764	0.97450-1.12627	0.183	1.12643	0.95204-1.33277	0.151	1.10462	0.97035-1.25746	0.00217	0.91806	0.264	20.7554	17	0.23742	20.7413	16	0.18867
ebi-a-GCST90001990	19	0.052	0.86673	0.75801-0.9910	0.11	0.90987	0.81039-1.02156	0.209	0.94938	0.87551-1.02948	0.71	0.96255	0.78951-1.17351	0.146	0.9113	0.80840-1.02730	0.02396	0.12092	0.231	21.9518	18	0.23413	18.9762	17	0.3299
ebi-a-GCST90001760	19	0.909	0.99615	0.93343-1.0631	0.659	0.98459	0.91906-1.05479	0.211	0.96878	0.92182-1.01813	0.618	1.0284	0.92310-1.14570	0.654	0.98515	0.92387-1.05050	-0.0151	0.21045	0.596	17.0747	18	0.51797	15.3808	17	0.56807
ebi-a-GCST90001663	26	0.372	0.96808	0.90272-1.0382	0.076	0.94167	0.88111-1.00640	0.211	0.96963	0.92387-1.01765	0.796	1.01528	0.90593-1.13782	0.185	0.95339	0.89010-1.02119	0.00074	0.95008	0.288	29.1223	25	0.25883	29.1175	24	0.21574
ebi-a-GCST90002089	18	0.534	1.02736	0.94524-1.1166	0.408	1.03219	0.95749-1.11272	0.213	1.03418	0.98092-1.09033	0.435	1.04912	0.93266-1.18011	0.34	1.03504	0.96627-1.10871	0.0027	0.83977	0.486	17.9137	17	0.3943	17.8666	16	0.33177
ebi-a-GCST90002040	30	0.661	1.01596	0.94725-1.0897	0.743	0.98851	0.92241-1.05933	0.213	1.03026	0.98305-1.07974	0.438	1.05462	0.92357-1.20426	0.955	0.99778	0.92402-1.07743	0.00533	0.6024	0.639	24.9026	29	0.68329	24.625	28	0.64816
ebi-a-GCST90001742	25	0.867	1.00685	0.93052-1.0894	0.753	0.98654	0.90668-1.07343	0.213	1.03556	0.98010-1.09416	0.774	1.02404	0.87207-1.20251	0.711	0.98491	0.90968-1.06636	0.01091	0.33902	0.685	18.803	24	0.76241	17.8496	23	0.76559
ebi-a-GCST90002027	21	0.629	1.04454	0.87778-1.2430	0.582	1.02918	0.92902-1.14013	0.214	1.05009	0.97222-1.13419	0.684	1.03495	0.87902-1.21854	0.828	1.01333	0.90055-1.14023	0.00141	0.94725	0.211	25.1395	20	0.19615	25.1335	19	0.15619
ebi-a-GCST90001707	16	0.036	0.92036	0.85819-0.9870	0.021	0.94143	0.89449-0.99083	0.215	0.96716	0.91741-1.01960	0.584	0.96849	0.86587-1.08327	0.038	0.94226	0.89520-0.99179	0.03612	0.0739	0.171	23.1593	15	0.08082	18.2857	14	0.19408
ebi-a-GCST90001822	26	0.731	0.98385	0.89759-1.0784	0.305	0.96614	0.90466-1.03180	0.215	0.96345	0.90832-1.02192	0.25	0.9296	0.82319-1.04975	0.356	0.97297	0.91893-1.03018	-0.00785	0.56097	0.085	36.7324	25	0.0612	36.208	24	0.05239
ebi-a-GCST90002067	20	0.213	0.91514	0.79993-1.0469	0.556	0.972	0.88426-1.06845	0.216	0.96021	0.90036-1.02404	0.662	1.03315	0.89477-1.19294	0.789	0.98401	0.87607-1.10526	0.01509	0.43555	0.619	16.4875	19	0.62454	15.8515	18	0.60291
ebi-a-GCST90001756	14	0.494	1.01573	0.97265-1.0607	0.523	1.01916	0.96152-1.08026	0.216	1.02353	0.98647-1.06198	0.922	1.00488	0.91379-1.10505	0.377	1.02152	0.97594-1.06924	0.00869	0.49875	0.344	14.7924	13	0.32049	14.2159	12	0.28713
ebi-a-GCST90001922	17	0.417	1.10581	0.87319-1.4004	0.276	1.07033	0.94712-1.20957	0.222	1.05726	0.96686-1.15611	0.351	1.10012	0.90554-1.33651	0.261	1.11454	0.92854-1.33779	-0.00969	0.69162	0.258	19.0916	16	0.26394	18.8857	15	0.21896
ebi-a-GCST90001417	23	0.886	0.99327	0.90657-1.0883	0.405	0.96192	0.87789-1.05400	0.223	0.96376	0.90820-1.02271	0.373	1.08682	0.90830-1.30041	0.488	1.04843	0.91924-1.19578	-0.01213	0.40177	0.218	25.7707	22	0.26166	24.9022	21	0.25142
ebi-a-GCST90001425	24	0.745	0.9851	0.90104-1.0770	0.789	0.98802	0.90466-1.07906	0.223	0.95878	0.89600-1.02596	0.096	0.86923	0.74184-1.01849	0.33	0.96018	0.88640-1.04010	-0.01185	0.3682	0.117	32.4537	23	0.09107	31.2546	22	0.09102
ebi-a-GCST90001665	22	0.237	0.97901	0.94621-1.0129	0.227	0.97763	0.94238-1.01420	0.225	0.98206	0.95377-1.01119	0.022	0.902	0.83110-0.97895	0.205	0.97856	0.94728-1.01087	0.00317	0.7157	0.568	20.9387	21	0.46269	20.7968	20	0.40918
ebi-a-GCST90001407	15	0.216	1.02699	0.98659-1.0691	0.333	1.0208	0.97911-1.06426	0.225	1.02204	0.98666-1.05869	0.896	1.00899	0.88391-1.15177	0.298	1.02199	0.98250-1.06307	-0.00527	0.63061	0.777	11.6684	14	0.63291	11.4259	13	0.57518
ebi-a-GCST90001420	14	0.546	0.93815	0.76690-1.1476	0.25	0.92679	0.81411-1.05506	0.226	0.93385	0.83586-1.04333	0.87	0.98217	0.79568-1.21236	0.348	0.9349	0.81640-1.07061	-0.00127	0.95744	0.121	20.3307	13	0.08726	20.3257	12	0.06117
ebi-a-GCST90001913	13	0.068	0.92316	0.85446-0.9974	0.063	0.9256	0.85312-1.00424	0.226	0.96259	0.90493-1.02393	0.727	1.02944	0.87798-1.20704	0.097	0.93246	0.86415-1.00616	0.02187	0.13669	0.206	14.914	12	0.24617	12.0827	11	0.35746
ebi-a-GCST90001516	15	0.439	1.03689	0.94865-1.1333	0.737	0.98722	0.91595-1.06403	0.227	1.03648	0.97794-1.09851	0.964	0.99713	0.88131-1.12816	0.981	0.9991	0.92815-1.07548	-0.0002	0.9907	0.106	20.8283	14	0.10611	20.8281	13	0.0764
ebi-a-GCST90001904	18	0.285	1.05292	0.96104-1.1536	0.382	1.04174	0.95044-1.14181	0.229	1.03753	0.97703-1.10178	0.887	1.01059	0.87585-1.16605	0.348	1.04586	0.95489-1.14550	-0.00542	0.68029	0.602	15.4208	17	0.5652	15.2446	16	0.5068
ebi-a-GCST90001583	22	0.088	1.03655	0.99673-1.0779	0.237	1.02484	0.98396-1.06741	0.23	1.02081	0.98702-1.05576	0.695	1.02124	0.92087-1.13254	0.197	1.0266	0.98768-1.06705	-0.01346	0.14995	0.918	12.9971	21	0.90873	10.7554	20	0.95232
ebi-a-GCST90001851	29	0.472	0.98272	0.93774-1.0299	0.503	0.98388	0.93818-1.03181	0.231	0.97899	0.94557-1.01359	0.471	0.97289	0.90375-1.04732	0.583	0.98826	0.94791-1.03034	-0.00207	0.81424	0.91	19.5681	28	0.87969	19.5118	27	0.85061
ebi-a-GCST90001972	21	0.719	1.00962	0.95898-1.0629	0.778	1.00817	0.95287-1.06668	0.232	1.02572	0.98384-1.06938	0.848	1.00991	0.91427-1.11555	0.605	1.01244	0.96688-1.06014	0.01026	0.31836	0.427	20.8344	20	0.40694	19.7432	19	0.41018
ebi-a-GCST90001840	20	0.119	0.87585	0.74720-1.0267	0.291	0.95156	0.86777-1.04343	0.234	0.95301	0.88035-1.03167	0.58	0.96127	0.83771-1.10306	0.319	0.94617	0.85109-1.05188	0.025	0.24656	0.096	28.7371	19	0.07023	26.6159	18	0.08649
ebi-a-GCST90001648	16	0.188	1.10657	0.95869-1.2773	0.274	1.05701	0.95697-1.16751	0.237	1.05131	0.96759-1.14227	0.926	0.99098	0.82167-1.19518	0.366	1.05013	0.94748-1.16391	-0.0145	0.40326	0.422	17.1133	15	0.31213	16.251	14	0.29829
ebi-a-GCST90001459	23	0.864	0.98986	0.88212-1.1108	0.182	0.93769	0.85320-1.03055	0.238	0.96013	0.89743-1.02720	0.446	0.93272	0.78238-1.11195	0.194	0.93788	0.85386-1.03017	-0.00899	0.52605	0.347	24.871	22	0.30328	24.3882	21	0.27463
ebi-a-GCST90001611	13	0.269	0.78943	0.53036-1.1751	0.44	0.9332	0.78294-1.11231	0.238	0.92793	0.81958-1.05060	0.99	0.99802	0.73729-1.35095	0.894	1.0215	0.75129-1.38890	0.02572	0.41903	0.422	12.2599	12	0.42504	11.5217	11	0.40065
ebi-a-GCST90001978	15	0.62	0.98801	0.94307-1.0351	0.428	0.98123	0.93636-1.02825	0.238	0.97718	0.94044-1.01535	0.531	0.97864	0.91632-1.04521	0.4	0.98072	0.93858-1.02477	-0.01091	0.42858	0.999	3.17076	14	0.99873	2.50308	13	0.99921
ebi-a-GCST90001435	17	0.424	0.97676	0.92352-1.0331	0.616	0.98646	0.93526-1.04047	0.241	0.97246	0.92808-1.01897	0.592	1.03318	0.91897-1.16158	0.288	0.97762	0.93892-1.01791	-0.00413	0.76809	0.12	28.5718	16	0.02699	28.4011	15	0.01919
ebi-a-GCST90001568	17	0.216	1.07974	0.96100-1.2132	0.196	1.08108	0.96063-1.21662	0.242	1.04881	0.96834-1.13597	0.452	1.07675	0.89208-1.29965	0.163	1.09631	0.96913-1.24017	-0.00905	0.51222	0.866	9.5775	16	0.88774	9.12683	15	0.87079
ebi-a-GCST90002047	16	0.927	1.01154	0.79525-1.2867	0.562	0.97289	0.88654-1.06766	0.242	0.9558	0.88610-1.03099	0.584	0.96249	0.84172-1.10059	0.514	0.95884	0.84774-1.08449	-0.01656	0.63314	0.174	20.3481	15	0.15898	20.0079	14	0.12989
ebi-a-GCST90001787	20	0.522	0.98127	0.92710-1.0386	0.365	0.97131	0.91198-1.03450	0.244	0.97409	0.93203-1.01804	0.179	0.92559	0.83038-1.03172	0.171	0.9576	0.90218-1.01642	-0.00426	0.69166	0.942	9.14551	19	0.97098	8.98307	18	0.96013
ebi-a-GCST90001559	16	0.396	1.0442	0.94787-1.1503	0.893	1.00607	0.92135-1.09858	0.245	1.0386	0.97438-1.10705	0.924	1.00702	0.87462-1.15947	0.944	1.00313	0.91993-1.09386	-0.00219	0.88378	0.313	17.4076	15	0.29509	17.38	14	0.23649
ebi-a-GCST90001525	23	0.362	1.03628	0.96149-1.1169	0.164	1.04832	0.98097-1.12028	0.246	1.02798	0.98110-1.07711	0.461	1.04007	0.93864-1.15246	0.221	1.04764	0.97445-1.12632	-0.00327	0.79066	0.951	12.6211	22	0.94319	12.5489	21	0.9236
ebi-a-GCST90001644	33	0.578	0.97425	0.88945-1.0671	0.874	0.99377	0.91996-1.07350	0.247	0.96897	0.91860-1.02210	0.725	1.02696	0.88682-1.18924	0.808	1.01347	0.91052-1.12807	-0.00145	0.88616	0.738	27.1718	32	0.70963	27.151	31	0.66457
ebi-a-GCST90001982	23	0.571	0.98667	0.94266-1.0327	0.172	0.96505	0.91707-1.01554	0.249	0.9784	0.94277-1.01538	0.911	0.99536	0.91799-1.07926	0.374	0.98035	0.93926-1.02324	-0.00845	0.53005	0.416	23.9233	22	0.35126	23.4677	21	0.31956
ebi-a-GCST90001403	16	0.897	1.01099	0.85984-1.1887	0.979	1.00162	0.88817-1.12957	0.249	0.94435	0.85681-1.04084	0.871	1.01528	0.84795-1.21563	0.899	0.99255	0.88555-1.11248	-0.01614	0.31998	0.291	18.7072	15	0.22731	17.3868	14	0.23615
ebi-a-GCST90001795	22	0.127	0.91632	0.82286-1.0204	0.183	0.93788	0.85333-1.03080	0.25	0.9593	0.89379-1.02961	0.356	0.91647	0.76461-1.09850	0.112	0.91925	0.83228-1.01531	0.01522	0.28271	0.315	24.0736	21	0.28951	22.6909	20	0.30423
ebi-a-GCST90002079	20	0.24	0.86762	0.69010-1.0908	0.249	0.92493	0.81008-1.05606	0.252	0.93203	0.82634-1.05124	0.567	1.08642	0.82183-1.43621	0.169	0.88137	0.74123-1.04799	0.01458	0.47815	0.003	40.323	19	0.00297	39.1809	18	0.00269
ebi-a-GCST90001816	22	0.12	1.06942	0.98626-1.1596	0.235	1.05121	0.96806-1.14149	0.253	1.03344	0.97678-1.09339	0.244	1.07898	0.95286-1.22180	0.171	1.05728	0.97887-1.14196	-0.01298	0.26501	0.416	22.7147	21	0.35937	21.3133	20	0.3789
ebi-a-GCST90001431	17	0.446	0.97216	0.90577-1.0434	0.365	0.96714	0.89968-1.03966	0.255	0.96736	0.91360-1.02428	0.621	0.95304	0.79045-1.14907	0.293	0.96888	0.91516-1.02575	-0.00357	0.80746	0.414	19.1586	16	0.26053	19.0803	15	0.21012
ebi-a-GCST90002108	22	0.974	1.00083	0.95194-1.0522	0.667	0.99017	0.94664-1.03569	0.256	0.98203	0.95179-1.01323	0.415	0.97	0.90279-1.04221	0.673	0.98965	0.94356-1.03799	-0.01441	0.35273	0.229	25.4139	21	0.22968	24.3133	20	0.22897
ebi-a-GCST90001689	32	0.421	0.99259	0.97501-1.0105	0.802	0.99705	0.97430-1.02033	0.257	0.9906	0.97456-1.00691	0.624	0.98923	0.94779-1.03249	0.483	0.99388	0.97715-1.01089	-0.00481	0.5695	0.363	33.0224	31	0.36851	32.6623	30	0.33738
ebi-a-GCST90001594	17	0.597	0.96019	0.82849-1.1128	0.984	1.00115	0.89766-1.11657	0.258	0.95484	0.88136-1.03443	0.644	1.0433	0.87480-1.24425	0.682	1.02633	0.90827-1.15972	-0.00154	0.93066	0.738	12.2187	16	0.7288	12.2108	15	0.66301
ebi-a-GCST90002051	14	0.15	1.12452	0.96844-1.3057	0.067	1.08678	0.99416-1.18802	0.261	1.03928	0.97180-1.11145	0.307	1.08943	0.93045-1.27557	0.149	1.1118	0.97094-1.27311	-0.02632	0.26965	0.635	10.2478	13	0.67355	8.90841	12	0.71073
ebi-a-GCST90001600	8	0.583	1.02284	0.94770-1.1039	0.362	1.02776	0.96898-1.09011	0.261	1.03024	0.97806-1.08521	0.596	1.03781	0.91023-1.18327	0.376	1.0271	0.97170-1.08566	0.00748	0.80877	0.813	4.69063	7	0.69766	4.62666	6	0.59251
ebi-a-GCST90001500	23	0.289	0.95419	0.87689-1.0383	0.428	0.96922	0.89709-1.04715	0.269	0.96674	0.91049-1.02646	0.559	0.96308	0.85061-1.09041	0.247	0.95949	0.89628-1.02716	0.00591	0.66541	0.13	31.4175	22	0.08788	31.1322	21	0.07149
ebi-a-GCST90001457	16	0.467	1.02357	0.96297-1.0880	0.313	1.03223	0.97060-1.09777	0.271	1.02877	0.97809-1.08208	0.475	1.05025	0.92105-1.19756	0.264	1.03352	0.97752-1.09273	0.00402	0.75911	0.537	16.7311	15	0.33519	16.6151	14	0.27727
ebi-a-GCST90002019	24	0.752	1.00873	0.95634-1.0640	0.477	1.02034	0.96527-1.07854	0.272	1.021	0.98380-1.05961	0.559	1.03028	0.93342-1.13720	0.377	1.0227	0.97392-1.07391	0.0074	0.53744	0.479	23.9581	23	0.40613	23.5382	22	0.3719
ebi-a-GCST90001781	23	0.85	1.0065	0.94180-1.0757	0.242	0.96686	0.91377-1.02304	0.275	0.9749	0.93142-1.02042	0.436	0.96097	0.87097-1.06027	0.296	0.97129	0.92083-1.02451	-0.01694	0.21499	0.169	29.5198	22	0.13061	27.3878	21	0.15838
ebi-a-GCST90001907	23	0.843	0.99398	0.93707-1.0543	0.904	1.00305	0.95444-1.05413	0.276	0.97453	0.93038-1.02079	0.827	1.01865	0.86479-1.19989	0.849	1.00476	0.95740-1.05445	-0.01292	0.30168	0.131	32.8331	22	0.06426	31.1689	21	0.07089
ebi-a-GCST90001786	19	0.065	1.20431	1.00128-1.4485	0.909	1.00711	0.89130-1.13798	0.277	1.05813	0.95572-1.17153	0.75	0.96675	0.78750-1.18680	0.714	0.96301	0.78979-1.17421	-0.03053	0.12411	0.057	28.9803	18	0.04862	25.1138	17	0.09219
ebi-a-GCST90001805	19	0.878	1.00783	0.91352-1.1119	0.667	1.02045	0.93044-1.11916	0.28	0.96485	0.90423-1.02953	0.596	0.955	0.80790-1.12888	0.692	1.01825	0.93251-1.11188	-0.01833	0.26602	0.076	26.283	18	0.09346	24.3856	17	0.10933
ebi-a-GCST90001504	20	0.243	1.04041	0.97561-1.1095	0.541	1.02156	0.95399-1.09391	0.281	1.02723	0.97831-1.07859	0.137	1.10369	0.97454-1.24995	0.533	1.01953	0.96040-1.08230	-0.00897	0.55826	0.981	8.69821	19	0.97816	8.34237	18	0.97309
ebi-a-GCST90001929	16	0.056	1.18661	1.01055-1.3934	0.037	1.12823	1.00724-1.26374	0.288	1.05239	0.95778-1.15635	0.249	1.12467	0.92831-1.36257	0.079	1.13977	0.99477-1.30591	-0.03045	0.10135	0.091	22.4999	15	0.09535	18.4478	14	0.18714
ebi-a-GCST90002024	16	0.999	1.00014	0.85926-1.1641	0.719	0.98296	0.89507-1.07949	0.29	0.96376	0.90009-1.03193	0.513	0.95076	0.82015-1.10218	0.861	0.98942	0.88005-1.11238	-0.00917	0.59886	0.486	14.8164	15	0.46472	14.516	14	0.41202
ebi-a-GCST90002066	21	0.899	1.00389	0.94629-1.0650	0.459	1.02489	0.96037-1.09375	0.291	1.02397	0.97994-1.06998	0.274	1.05591	0.96040-1.16092	0.499	1.02009	0.96391-1.07954	0.01179	0.33788	0.951	10.8413	20	0.95024	9.87468	19	0.95597
ebi-a-GCST90001522	17	0.027	1.21791	1.04012-1.4261	0.342	1.04521	0.95412-1.14498	0.293	1.03712	0.96896-1.11007	0.604	1.03988	0.89954-1.20211	0.434	1.04916	0.93315-1.17959	-0.04744	0.04537	0.327	18.1303	16	0.31632	13.3663	15	0.57403
ebi-a-GCST90001912	7	0.979	0.9981	0.87106-1.1437	0.55	1.03703	0.92051-1.16829	0.295	1.05402	0.95522-1.16304	0.311	1.12039	0.91580-1.37070	0.425	1.05234	0.93624-1.18285	0.0214	0.31641	0.477	6.72029	6	0.34749	5.38628	5	0.37058
ebi-a-GCST90002016	18	0.118	1.06934	0.98765-1.1578	0.364	1.03934	0.95625-1.12966	0.295	1.02925	0.97515-1.08635	0.93	1.00678	0.86690-1.16923	0.089	1.07674	0.99368-1.16673	-0.01475	0.21724	0.602	12.2398	17	0.78541	10.5897	16	0.83407
ebi-a-GCST90001651	23	0.698	0.97137	0.84044-1.1227	0.623	0.97073	0.86218-1.09296	0.298	0.95333	0.87135-1.04303	0.981	0.99716	0.79060-1.25768	0.681	1.03828	0.87028-1.23870	-0.00498	0.74605	0.058	33.448	22	0.05584	33.2773	21	0.04323
ebi-a-GCST90001711	16	0.802	0.99137	0.92771-1.0594	0.046	0.94405	0.89219-0.99892	0.298	0.97325	0.92480-1.02422	0.998	1.00019	0.86557-1.15575	0.11	0.94874	0.89284-1.00814	-0.01399	0.40236	0.182	21.5045	15	0.12147	20.4168	14	0.11754
ebi-a-GCST90001724	27	0.241	1.0315	0.98060-1.0851	0.379	1.02714	0.96762-1.09033	0.3	1.02181	0.98100-1.06431	0.691	1.02447	0.91050-1.15271	0.383	1.0217	0.97443-1.07126	-0.00614	0.53388	0.437	28.2715	26	0.34523	27.8285	25	0.31581
ebi-a-GCST90002093	15	0.507	1.04917	0.91399-1.2043	0.987	0.99927	0.91246-1.09433	0.303	1.03696	0.96773-1.11115	0.847	0.98658	0.86227-1.12882	0.868	1.00895	0.90981-1.11890	-0.00423	0.84874	0.427	15.1014	14	0.37126	15.0575	13	0.30378
ebi-a-GCST90001456	16	0.226	0.89997	0.76445-1.0595	0.278	0.93187	0.82042-1.05847	0.311	0.95152	0.86436-1.04747	0.292	0.89098	0.72415-1.09624	0.279	0.92233	0.80104-1.06198	0.0153	0.41932	0.254	19.1659	15	0.20631	18.2627	14	0.19508
ebi-a-GCST90001970	17	0.822	1.00864	0.93705-1.0857	0.899	0.99607	0.93728-1.05854	0.311	1.02781	0.97469-1.08383	0.683	1.01959	0.93058-1.11712	0.69	1.0112	0.95835-1.06696	0.013	0.47368	0.098	25.1146	16	0.06783	24.2416	15	0.0611
ebi-a-GCST90001801	22	0.972	0.99865	0.92704-1.0758	0.813	0.99169	0.92553-1.06258	0.315	0.97898	0.93922-1.02042	0.809	1.01416	0.90635-1.13480	0.615	1.02756	0.92571-1.14061	-0.01043	0.53447	0.322	20.565	21	0.48577	20.1622	20	0.44783
ebi-a-GCST90002007	16	0.246	1.03115	0.98124-1.0836	0.776	1.0065	0.96255-1.05245	0.316	1.02009	0.98122-1.06051	0.661	1.0214	0.93089-1.12072	0.364	1.01668	0.98204-1.05254	-0.01298	0.49245	0.076	27.4006	15	0.02564	26.4615	14	0.0226
ebi-a-GCST90001506	13	0.579	1.02821	0.93468-1.1311	0.169	1.07202	0.97097-1.18359	0.316	1.03662	0.96618-1.11221	0.477	1.06023	0.90689-1.23950	0.223	1.07527	0.96255-1.20119	0.00378	0.80867	0.865	6.49243	12	0.88926	6.4309	11	0.84312
ebi-a-GCST90001462	16	0.336	0.97957	0.94060-1.0202	0.51	0.98659	0.94771-1.02706	0.317	0.98283	0.95002-1.01677	0.06	0.89781	0.80921-0.99612	0.281	0.98023	0.94653-1.01512	0.00432	0.75576	0.451	16.7166	15	0.33608	16.5973	14	0.27827
ebi-a-GCST90001923	13	0.643	1.0163	0.95083-1.0863	0.668	0.98436	0.91602-1.05780	0.321	0.96853	0.90921-1.03171	0.794	0.98165	0.85709-1.12432	0.86	0.9946	0.93767-1.05499	-0.02734	0.03608	0.234	17.235	12	0.14097	11.3554	11	0.41399
ebi-a-GCST90001985	26	0.557	1.01241	0.97215-1.0543	0.344	1.01768	0.98139-1.05532	0.323	1.01584	0.98467-1.04799	0.506	1.02118	0.96094-1.08519	0.167	1.02118	0.99213-1.05107	0.00363	0.7955	0.069	38.7244	25	0.03925	38.6139	24	0.02997
ebi-a-GCST90001401	21	0.164	0.88116	0.74259-1.0456	0.947	1.00429	0.88502-1.13963	0.324	1.04368	0.95859-1.13632	0.913	0.9859	0.76642-1.26822	0.591	0.92185	0.68838-1.23451	0.0389	0.04214	0.154	24.5412	20	0.21955	19.6351	19	0.41683
ebi-a-GCST90001928	13	0.169	1.05739	0.98172-1.1389	0.555	1.0255	0.94315-1.11504	0.329	1.02892	0.97170-1.08952	0.283	0.91348	0.78010-1.06967	0.346	1.03727	0.96420-1.11588	-0.01825	0.28235	0.505	11.0785	12	0.52221	9.80063	11	0.5484
ebi-a-GCST90001409	20	0.447	0.97797	0.92460-1.0344	0.318	0.97079	0.91589-1.02899	0.332	0.97764	0.93402-1.02331	0.363	0.94197	0.83079-1.06804	0.275	0.97075	0.92176-1.02233	-0.00019	0.98445	0.735	16.4459	19	0.62735	16.4455	18	0.56149
ebi-a-GCST90002010	14	0.97	1.00177	0.91610-1.0955	0.187	1.04243	0.98009-1.10874	0.335	1.02331	0.97650-1.07237	0.826	0.98839	0.89228-1.09485	0.348	1.03127	0.96925-1.09725	0.01087	0.59005	0.309	14.914	13	0.31275	14.5427	12	0.26741
ebi-a-GCST90001445	10	0.625	1.12303	0.71751-1.7577	0.721	1.03786	0.84655-1.27240	0.335	0.90707	0.74378-1.10621	0.351	1.16414	0.85999-1.57585	0.443	1.10153	0.86977-1.39505	-0.05098	0.32829	0.029	20.8944	9	0.01313	18.4015	8	0.01841
ebi-a-GCST90001560	23	0.756	1.00373	0.98070-1.0273	0.728	1.00493	0.97746-1.03318	0.337	1.01038	0.98932-1.03189	0.488	1.02223	0.96158-1.08670	0.637	1.00544	0.98336-1.02803	0.01312	0.19872	0.564	21.3631	22	0.49841	19.6018	21	0.54659
ebi-a-GCST90001464	18	0.91	0.99694	0.94601-1.0506	0.532	0.98268	0.93022-1.03808	0.338	0.97983	0.93986-1.02151	0.781	0.98351	0.87651-1.10356	0.5	0.98351	0.93803-1.03119	-0.01367	0.30265	0.731	13.7569	17	0.68423	12.6225	16	0.70013
ebi-a-GCST90001461	16	0.746	0.97575	0.84367-1.1285	0.426	0.95515	0.85306-1.06945	0.338	0.96119	0.88639-1.04230	0.289	1.12835	0.90966-1.39961	0.469	0.95686	0.85188-1.07479	-0.00403	0.80789	0.476	15.6138	15	0.40817	15.5457	14	0.3419
ebi-a-GCST90001645	19	0.421	1.0596	0.92338-1.2159	0.327	1.05361	0.94907-1.16967	0.34	1.04016	0.95927-1.12787	0.649	1.03326	0.89946-1.18695	0.422	1.04714	0.93813-1.16883	-0.00483	0.74486	0.313	21.1231	18	0.27325	20.9881	17	0.22682
ebi-a-GCST90001400	13	0.405	1.02156	0.97342-1.0721	0.347	1.02052	0.97821-1.06467	0.341	1.01861	0.98070-1.05799	0.575	1.02691	0.93816-1.12406	0.264	1.02217	0.98536-1.06035	-0.00281	0.84151	0.432	15.3837	12	0.22112	15.3253	11	0.16808
ebi-a-GCST90001861	22	0.641	0.96861	0.84871-1.1054	0.945	1.00275	0.92756-1.08404	0.342	1.0354	0.96369-1.11246	0.556	0.96213	0.84797-1.09166	0.969	1.00155	0.92807-1.08086	0.02207	0.25428	0.085	32.3625	21	0.05378	30.2768	20	0.06549
ebi-a-GCST90001739	19	0.561	1.05017	0.89339-1.2345	0.403	1.05746	0.92774-1.20531	0.342	1.04288	0.95628-1.13733	0.222	1.13249	0.93406-1.37308	0.292	1.08295	0.93775-1.25064	-0.00173	0.92152	0.928	10.1239	18	0.92779	10.1139	17	0.89876
ebi-a-GCST90001694	21	0.246	1.05833	0.96447-1.1613	0.382	1.04049	0.95198-1.13722	0.348	1.02987	0.96851-1.09511	0.581	1.04021	0.90646-1.19370	0.218	1.05053	0.97372-1.13339	-0.01004	0.44877	0.442	21.859	20	0.34821	21.1917	19	0.3263
ebi-a-GCST90001606	12	0.081	0.75345	0.56613-1.0027	0.386	0.92446	0.77399-1.10419	0.348	0.93988	0.82568-1.06987	0.557	0.91967	0.70130-1.20605	0.545	0.9162	0.69634-1.20548	0.0418	0.11983	0.64	8.99677	11	0.62219	6.10435	10	0.80642
ebi-a-GCST90001486	13	0.41	0.97478	0.91945-1.0334	0.45	0.97601	0.91646-1.03943	0.351	0.97734	0.93142-1.02552	0.274	1.06695	0.95505-1.19195	0.373	0.9746	0.92294-1.02915	0.00219	0.87964	0.91	6.9751	12	0.85925	6.95108	11	0.80303
ebi-a-GCST90001630	24	0.785	1.02253	0.87329-1.1973	0.546	1.03565	0.92431-1.16040	0.351	1.04003	0.95769-1.12944	0.857	1.01929	0.82953-1.25246	0.552	1.04897	0.89831-1.22489	0.00351	0.80543	0.173	28.7809	23	0.18769	28.6998	22	0.15363
ebi-a-GCST90001769	27	0.728	0.99011	0.93684-1.0464	0.558	0.98335	0.92967-1.04012	0.351	0.98153	0.94380-1.02076	0.91	0.99536	0.91882-1.07827	0.441	0.98186	0.93783-1.02795	-0.00481	0.6604	0.391	28.4223	26	0.338	28.1993	25	0.29876
ebi-a-GCST90002001	16	0.5	0.93196	0.76327-1.1379	0.409	1.05436	0.92998-1.19537	0.351	1.04903	0.94858-1.16011	0.761	0.96748	0.78470-1.19284	0.903	1.00972	0.86716-1.17573	0.03017	0.2036	0.084	23.19	15	0.08019	20.5758	14	0.11301
ebi-a-GCST90001440	23	0.558	0.96921	0.87437-1.0743	0.471	0.96654	0.88111-1.06025	0.352	0.96826	0.90467-1.03632	0.825	0.98144	0.83252-1.15700	0.564	0.96969	0.87491-1.07474	-0.00031	0.98011	0.351	24.2295	22	0.33531	24.2288	21	0.28211
ebi-a-GCST90001469	20	0.209	0.96222	0.90808-1.0196	0.143	0.95917	0.90708-1.01425	0.352	0.98016	0.93965-1.02242	0.625	0.97248	0.87121-1.08552	0.149	0.96131	0.91315-1.01201	0.01133	0.37325	0.602	17.0033	19	0.58964	16.1695	18	0.58072
ebi-a-GCST90001470	21	0.417	0.95789	0.86540-1.0603	0.838	0.99113	0.91008-1.07939	0.356	1.0301	0.96723-1.09706	0.757	1.02212	0.89151-1.17187	0.941	1.00334	0.91962-1.09467	0.02289	0.08965	0.854	13.877	20	0.83668	10.6783	19	0.93419
ebi-a-GCST90001867	26	0.661	0.98107	0.90171-1.0674	0.982	1.00087	0.92724-1.08035	0.356	1.02704	0.97044-1.08693	0.605	0.96958	0.86370-1.08843	0.865	1.00614	0.93820-1.07900	0.01715	0.17011	0.221	31.4353	25	0.17501	29.0169	24	0.2195
ebi-a-GCST90001831	11	0.15	1.21944	0.95238-1.5614	0.311	0.9331	0.81611-1.06687	0.357	0.94185	0.82915-1.06987	0.397	0.91502	0.75158-1.11401	0.271	0.91754	0.79382-1.06055	-0.06544	0.04916	0.041	19.6595	10	0.03264	12.4917	9	0.18698
ebi-a-GCST90001691	23	0.368	1.0114	0.98729-1.0361	0.555	1.00852	0.98052-1.03732	0.357	1.01022	0.98860-1.03231	0.377	1.03042	0.96550-1.09971	0.416	1.01024	0.98618-1.03489	-0.00187	0.83265	0.744	17.1802	22	0.75334	17.1345	21	0.70292
ebi-a-GCST90001610	17	0.843	0.98217	0.82457-1.1699	0.939	0.99478	0.87032-1.13705	0.358	0.9576	0.87316-1.05020	0.886	1.01706	0.80930-1.27814	0.945	1.00615	0.84691-1.19532	-0.00548	0.74282	0.568	14.153	16	0.58732	14.0413	15	0.5224
ebi-a-GCST90001474	20	0.892	0.99377	0.90933-1.0860	0.982	0.99907	0.92237-1.08215	0.358	1.02777	0.96948-1.08957	0.939	0.99474	0.87089-1.13620	0.998	0.9999	0.92524-1.08058	0.01201	0.33705	0.256	22.9014	19	0.24171	21.7271	18	0.24433
ebi-a-GCST90001410	12	0.266	1.1795	0.89620-1.5524	0.135	1.11538	0.96664-1.28700	0.362	1.05548	0.93970-1.18552	0.23	1.1347	0.93386-1.37874	0.282	1.10637	0.92870-1.31802	-0.02084	0.40111	0.233	13.8633	11	0.24065	12.8734	10	0.23084
ebi-a-GCST90001806	27	0.138	0.9106	0.80766-1.0266	0.201	0.94571	0.86817-1.03017	0.363	0.9722	0.91493-1.03306	0.994	1.00063	0.84627-1.18313	0.019	0.88723	0.80767-0.97462	0.01928	0.22792	0.131	32.1561	26	0.18801	30.3041	25	0.2131
ebi-a-GCST90001714	4	0.632	1.06493	0.85425-1.3276	0.247	1.07223	0.95290-1.20650	0.364	1.06722	0.92733-1.22820	0.278	1.20089	0.91509-1.57596	0.29	1.08012	0.96012-1.21513	0.00101	0.97841	0.341	6.49144	3	0.09	6.48842	2	0.039
ebi-a-GCST90001395	18	0.699	0.98975	0.94027-1.0418	0.489	0.98345	0.93808-1.03101	0.365	0.97923	0.93578-1.02469	0.615	0.96749	0.85259-1.09788	0.469	0.98615	0.95043-1.02322	-0.0125	0.38314	0.206	25.2728	17	0.08877	24.0634	16	0.08813
ebi-a-GCST90001654	27	0.303	1.0538	0.95584-1.1618	0.377	1.0433	0.94973-1.14610	0.367	1.0298	0.96616-1.09762	0.33	1.08707	0.92201-1.28169	0.206	1.05477	0.97305-1.14335	-0.00731	0.54254	0.356	29.3609	26	0.29493	28.92	25	0.26728
ebi-a-GCST90001546	16	0.448	0.91547	0.73336-1.1428	0.759	0.97758	0.84577-1.12993	0.369	0.95194	0.85496-1.05993	0.928	0.98936	0.78642-1.24468	0.889	0.98562	0.80729-1.20334	0.00698	0.69907	0.912	7.84416	15	0.92988	7.68845	14	0.90492
ebi-a-GCST90001430	27	0.146	1.04652	0.98615-1.1106	0.05	1.05399	0.99998-1.11092	0.37	1.024	0.97221-1.07854	0.995	0.99955	0.86587-1.15388	0.067	1.04606	0.99893-1.09542	-0.01569	0.1749	0.064	50.471	26	0.00276	46.8197	25	0.00515
ebi-a-GCST90001492	20	0.463	1.01034	0.98351-1.0379	0.97	1.00059	0.96993-1.03222	0.375	1.0099	0.98815-1.03214	0.134	1.04001	0.99018-1.09236	0.753	1.00408	0.97927-1.02951	-0.00071	0.95562	0.518	18.8621	19	0.46571	18.8588	18	0.40057
ebi-a-GCST90001726	28	0.58	1.01092	0.97320-1.0501	0.875	0.99652	0.95412-1.04081	0.375	0.98505	0.95278-1.01841	0.483	1.04432	0.92662-1.17697	0.975	0.99946	0.96668-1.03335	-0.02349	0.02271	0.358	29.7828	27	0.324	23.9164	26	0.58074
ebi-a-GCST90001983	13	0.294	0.8465	0.62935-1.1386	0.711	0.97238	0.83853-1.12760	0.376	0.95465	0.86150-1.05787	0.532	0.91977	0.71301-1.18648	0.728	0.95598	0.74618-1.22477	0.02136	0.41407	0.428	12.2177	12	0.42836	11.4666	11	0.40504
ebi-a-GCST90001775	24	0.392	0.97815	0.93085-1.0279	0.3	0.97131	0.91927-1.02629	0.377	0.98198	0.94315-1.02241	0.979	0.99847	0.89229-1.11727	0.236	0.97075	0.92546-1.01826	0.00323	0.78438	0.546	22.9391	23	0.46433	22.8594	22	0.40971
ebi-a-GCST90001621	32	0.274	1.05427	0.96075-1.1569	0.151	1.06018	0.97882-1.14830	0.378	1.02485	0.97046-1.08229	0.856	0.98611	0.84920-1.14511	0.212	1.06638	0.96594-1.17727	-0.00791	0.46642	0.638	27.3788	31	0.65302	26.8346	30	0.63194
ebi-a-GCST90001826	19	0.66	0.98395	0.91661-1.0562	0.637	0.9854	0.92704-1.04743	0.383	0.979	0.93339-1.02684	0.438	0.95873	0.86395-1.06390	0.312	0.97334	0.92500-1.02420	-0.00249	0.84915	0.415	20.1668	18	0.32351	20.1226	17	0.26801
ebi-a-GCST90001973	17	0.754	1.01038	0.94822-1.0766	0.886	0.99461	0.92387-1.07076	0.385	1.02362	0.97111-1.07897	0.704	0.97396	0.85197-1.11342	0.698	1.01178	0.95467-1.07231	0.00885	0.46877	0.46	16.5218	16	0.41717	15.9348	15	0.3864
ebi-a-GCST90001597	17	0.923	1.00725	0.87268-1.1626	0.522	1.03808	0.92588-1.16388	0.393	1.03413	0.95746-1.11695	0.301	1.10579	0.91972-1.32950	0.692	1.02817	0.89838-1.17671	0.0088	0.67562	0.841	10.3753	16	0.84631	10.1932	15	0.80741
ebi-a-GCST90002046	20	0.768	0.99436	0.95819-1.0319	0.262	0.98322	0.95457-1.01274	0.394	0.98668	0.95670-1.01759	0.525	0.97948	0.91982-1.04300	0.278	0.98579	0.96132-1.01087	-0.01125	0.45688	0.031	36.0757	19	0.01033	34.953	18	0.00958
ebi-a-GCST90001398	17	0.401	1.071	0.91674-1.2512	0.151	1.08687	0.96996-1.21788	0.395	1.04042	0.94970-1.13981	0.74	1.03351	0.85338-1.25166	0.279	1.07574	0.94674-1.22230	-0.00821	0.65423	0.185	21.3981	16	0.16371	21.1043	15	0.13353
ebi-a-GCST90002020	18	0.081	0.86593	0.74422-1.0075	0.449	0.96754	0.88830-1.05385	0.397	0.97017	0.90455-1.04054	0.496	0.95759	0.84749-1.08199	0.539	0.96785	0.87381-1.07202	0.03542	0.12075	0.18	22.6706	17	0.16029	19.4119	16	0.24788
ebi-a-GCST90001910	10	0.185	0.96601	0.92194-1.0122	0.52	0.98492	0.94035-1.03160	0.397	0.98295	0.94463-1.02283	0.29	0.95176	0.87323-1.03736	0.34	0.97831	0.93748-1.02091	0.02082	0.20136	0.701	7.76284	9	0.55821	5.8248	8	0.66685
ebi-a-GCST90001682	13	0.061	1.24404	1.01371-1.5267	0.574	1.04019	0.90683-1.19315	0.398	1.04482	0.94379-1.15667	0.502	1.07789	0.87165-1.33293	0.27	1.11074	0.92969-1.32704	-0.04024	0.08758	0.245	14.3653	12	0.27799	10.8499	11	0.45592
ebi-a-GCST90001959	14	0.194	0.87233	0.71811-1.0597	0.72	0.97729	0.86186-1.10819	0.399	0.96132	0.87717-1.05355	0.503	0.93274	0.76515-1.13703	0.896	0.98911	0.84214-1.16173	0.02235	0.29008	0.448	13.3462	13	0.42144	12.11	12	0.43689
ebi-a-GCST90001892	13	0.673	0.97587	0.87381-1.0899	0.618	0.98236	0.91599-1.05353	0.399	0.97144	0.90815-1.03914	0.592	0.9697	0.86906-1.08201	0.413	0.9697	0.90314-1.04117	-0.00227	0.91847	0.126	19.9665	12	0.06772	19.9466	11	0.04608
ebi-a-GCST90002098	29	0.316	0.97002	0.91501-1.0283	0.345	0.97442	0.92343-1.02823	0.4	0.98067	0.93705-1.02631	0.947	0.99713	0.91645-1.08491	0.487	0.98376	0.93993-1.02963	0.00816	0.55626	0.042	43.5907	28	0.03049	43.025	27	0.02601
ebi-a-GCST90001503	26	0.349	1.01271	0.98681-1.0393	0.976	1.00047	0.97106-1.03076	0.403	1.00946	0.98744-1.03198	0.663	0.98868	0.93985-1.04005	0.907	1.00138	0.97867-1.02461	-0.00496	0.63241	0.286	29.0121	25	0.26341	28.731	24	0.23042
ebi-a-GCST90001797	19	0.25	1.05563	0.96569-1.1539	0.317	1.04693	0.95706-1.14523	0.404	1.02913	0.96197-1.10098	0.434	1.06138	0.91721-1.22822	0.251	1.05216	0.96740-1.14435	-0.00968	0.39855	0.456	19.5966	18	0.35599	18.7686	17	0.34198
ebi-a-GCST90001673	13	0.383	1.03452	0.96147-1.1131	0.41	1.03042	0.95956-1.10652	0.405	1.02518	0.96684-1.08703	0.581	1.04615	0.89524-1.22249	0.377	1.03024	0.96664-1.09802	-0.00512	0.69352	0.855	8.19158	12	0.76999	8.02786	11	0.71081
ebi-a-GCST90001812	17	0.435	0.96096	0.87188-1.0591	0.451	0.96897	0.89277-1.05168	0.407	0.97532	0.91939-1.03465	0.952	1.00415	0.87897-1.14716	0.456	0.9696	0.89576-1.04953	0.00802	0.70757	0.503	16.2553	16	0.43529	16.0984	15	0.37554
ebi-a-GCST90001815	16	0.549	1.01499	0.96790-1.0644	0.759	1.00733	0.96141-1.05544	0.408	1.01684	0.97740-1.05787	0.902	0.9931	0.89112-1.10674	0.793	1.00622	0.96143-1.05309	0.00189	0.89412	0.865	9.83679	15	0.82988	9.81842	14	0.77533
ebi-a-GCST90001743	20	0.302	1.11256	0.91400-1.3543	0.715	0.9818	0.88976-1.08335	0.41	0.9615	0.87579-1.05559	0.567	0.9455	0.78291-1.14186	0.548	0.95209	0.81341-1.11441	-0.0373	0.1196	0.003	41.7834	19	0.0019	36.3853	18	0.0063
ebi-a-GCST90001676	7	0.882	0.97612	0.72089-1.3217	0.715	1.03409	0.86375-1.23802	0.41	1.06389	0.91811-1.23283	0.862	1.02456	0.78864-1.33105	0.903	1.01649	0.78995-1.30800	0.0153	0.55205	0.973	1.30937	6	0.97114	0.90341	5	0.96997
ebi-a-GCST90001852	16	0.252	0.90842	0.77590-1.0636	0.763	0.98348	0.88254-1.09597	0.411	0.96804	0.89586-1.04604	0.97	0.99683	0.84869-1.17081	0.877	0.99029	0.87674-1.11855	0.01929	0.37953	0.744	11.3214	15	0.72949	10.498	14	0.72494
ebi-a-GCST90002085	20	0.936	1.0039	0.91432-1.1023	0.883	0.9937	0.91373-1.08067	0.413	1.02573	0.96523-1.09002	0.654	1.02982	0.90739-1.16878	0.917	0.99565	0.91796-1.07991	0.00799	0.56009	0.787	14.2879	19	0.76666	13.9353	18	0.7333
ebi-a-GCST90001660	26	0.281	0.97064	0.92054-1.0235	0.416	0.97812	0.92738-1.03164	0.413	0.98427	0.94760-1.02236	0.717	1.01501	0.93715-1.09934	0.576	0.98601	0.93915-1.03521	0.00707	0.46696	0.731	21.0678	25	0.68882	20.5214	24	0.66677
ebi-a-GCST90001953	17	0.773	0.99012	0.92673-1.0579	0.512	0.98599	0.94530-1.02842	0.413	1.01717	0.97652-1.05951	0.383	1.0536	0.94006-1.18086	0.817	0.99512	0.95530-1.03661	0.01782	0.32706	0.183	23.0314	16	0.1129	21.5563	15	0.11998
ebi-a-GCST90002110	20	0.929	0.99737	0.94204-1.0559	0.887	1.00382	0.95255-1.05786	0.416	1.01684	0.97676-1.05856	0.367	1.03754	0.95950-1.12193	0.91	0.99708	0.94862-1.04802	0.01292	0.36033	0.139	26.013	19	0.12983	24.7991	18	0.13055
ebi-a-GCST90001602	19	0.255	0.95252	0.87845-1.0328	0.88	1.00541	0.93718-1.07861	0.416	0.97312	0.91126-1.03919	0.525	0.94214	0.78663-1.12840	0.807	0.99206	0.93160-1.05644	0.01317	0.38276	0.093	31.8261	18	0.02305	30.3909	17	0.02366
ebi-a-GCST90002042	17	0.576	0.94065	0.76286-1.1599	0.85	0.99148	0.90734-1.08343	0.416	0.97334	0.91194-1.03888	0.955	1.00448	0.86084-1.17209	0.862	0.98882	0.87303-1.11996	0.00851	0.74127	0.525	15.0196	16	0.52321	14.9064	15	0.45818
ebi-a-GCST90001722	18	0.372	0.94225	0.82993-1.0698	0.525	0.96652	0.87011-1.07361	0.417	0.96944	0.89948-1.04483	0.808	0.98118	0.84379-1.14093	0.548	0.9617	0.84878-1.08965	0.0089	0.59387	0.863	11.2808	17	0.8416	10.9848	16	0.81042
ebi-a-GCST90001741	21	0.753	0.99427	0.95984-1.0299	0.866	1.00391	0.95939-1.05050	0.418	1.01256	0.98241-1.04363	0.353	1.05029	0.94935-1.16197	0.854	1.00317	0.97029-1.03716	0.01947	0.06349	0.582	18.5895	20	0.54863	14.7054	19	0.74113
ebi-a-GCST90001936	21	0.321	1.02131	0.98067-1.0636	0.616	1.01189	0.96622-1.05973	0.421	1.0142	0.97999-1.04960	0.637	1.02374	0.93018-1.12670	0.368	1.01876	0.97926-1.05985	-0.00657	0.51997	0.37	21.5377	20	0.36612	21.0613	19	0.33342
ebi-a-GCST90001555	20	0.242	0.97586	0.93799-1.0153	0.178	0.97586	0.94175-1.01121	0.421	0.98584	0.95219-1.02068	0.919	0.99572	0.91758-1.08051	0.183	0.97825	0.94822-1.00923	0.01366	0.31107	0.106	31.0995	19	0.03937	29.3294	18	0.0445
ebi-a-GCST90001937	17	0.679	0.98204	0.90273-1.0683	0.938	0.9966	0.91471-1.08582	0.427	0.97476	0.91517-1.03824	0.616	0.95536	0.80197-1.13809	0.897	0.99469	0.91919-1.07640	-0.00292	0.79732	0.6	14.1429	16	0.58807	14.0746	15	0.51988
ebi-a-GCST90001634	18	0.279	0.93096	0.82157-1.0549	0.675	1.0205	0.92799-1.12223	0.428	0.96987	0.89925-1.04603	0.627	1.03957	0.89135-1.21245	0.759	1.01703	0.91457-1.13095	0.0143	0.42929	0.138	23.7047	17	0.12768	22.7688	16	0.12006
ebi-a-GCST90001566	15	0.671	1.03067	0.89953-1.1809	0.154	1.08882	0.96868-1.22387	0.43	1.03458	0.95085-1.12569	0.52	0.93263	0.75826-1.14709	0.383	1.06288	0.93089-1.21359	0.00114	0.94564	0.61	11.6701	14	0.63278	11.6653	13	0.55526
ebi-a-GCST90001735	22	0.546	0.95577	0.82731-1.1042	0.287	0.94581	0.85360-1.04798	0.432	0.9699	0.89874-1.04668	0.553	0.94798	0.79698-1.12760	0.567	0.96586	0.85922-1.08573	0.00373	0.81534	0.248	25.9607	21	0.20795	25.8882	20	0.16954
ebi-a-GCST90002082	15	0.306	0.97068	0.91900-1.0253	0.264	0.96489	0.90621-1.02737	0.435	0.98221	0.93897-1.02745	0.969	1.00254	0.88307-1.13817	0.265	0.97156	0.92536-1.02007	0.01351	0.45527	0.328	16.3694	14	0.29134	15.6561	13	0.2682
ebi-a-GCST90001986	14	0.372	0.91992	0.77120-1.0973	0.445	0.95436	0.84647-1.07600	0.435	0.96008	0.86671-1.06350	0.764	0.97098	0.80467-1.17168	0.509	0.95728	0.84397-1.08580	0.01219	0.56547	0.188	18.4398	13	0.14152	17.9182	12	0.1182
ebi-a-GCST90002015	18	0.065	1.0833	1.00072-1.1727	0.364	1.03902	0.95657-1.12858	0.437	1.02149	0.96817-1.07774	0.936	1.00611	0.86833-1.16576	0.083	1.07544	0.99543-1.16187	-0.02167	0.06627	0.344	16.7637	17	0.47048	12.8788	16	0.6816
ebi-a-GCST90001879	23	0.811	0.9894	0.90780-1.0783	0.9	0.99549	0.92748-1.06850	0.44	0.9813	0.93539-1.02947	0.753	0.98187	0.87725-1.09896	0.961	0.99813	0.92743-1.07422	-0.00296	0.82226	0.205	27.7059	22	0.18563	27.6378	21	0.15073
ebi-a-GCST90001466	17	0.955	0.99591	0.86649-1.1447	0.179	1.08952	0.96148-1.23460	0.446	1.03311	0.95016-1.12329	0.242	1.12436	0.93064-1.35842	0.113	1.13559	0.97878-1.31752	0.01047	0.52368	0.388	16.5591	16	0.41466	16.1015	15	0.37534
ebi-a-GCST90001964	24	0.8	0.99318	0.94249-1.0466	0.325	1.02836	0.97266-1.08724	0.448	1.01482	0.97701-1.05409	0.935	1.00382	0.91683-1.09907	0.356	1.02312	0.97561-1.07294	0.01213	0.25809	0.462	23.6619	23	0.42272	22.2959	22	0.44235
ebi-a-GCST90001832	13	0.181	1.13355	0.95439-1.3463	0.229	1.06521	0.96092-1.18081	0.449	1.0418	0.93710-1.15819	0.479	1.04745	0.92498-1.18614	0.293	1.05887	0.95619-1.17258	-0.0255	0.25277	0.1	22.1786	12	0.03557	19.585	11	0.05137
ebi-a-GCST90001477	20	0.164	0.94358	0.87246-1.0205	0.03	0.92609	0.86411-0.99251	0.449	0.97729	0.92084-1.03719	0.169	0.91818	0.81673-1.03223	0.066	0.92961	0.86397-1.00025	0.02038	0.20469	0.076	29.0824	19	0.0647	26.5299	18	0.08825
ebi-a-GCST90001683	12	0.9	1.01462	0.81451-1.2639	0.811	0.98254	0.85064-1.13488	0.449	0.95503	0.84775-1.07588	0.835	1.02359	0.82649-1.26769	0.879	0.98839	0.85379-1.14421	-0.01376	0.53011	0.311	13.8216	11	0.24302	13.2607	10	0.20946
ebi-a-GCST90001891	9	0.556	0.94223	0.78016-1.1380	0.297	0.94172	0.84117-1.05430	0.45	0.96385	0.87602-1.06048	0.733	0.96933	0.81566-1.15194	0.346	0.9472	0.85179-1.05330	0.00653	0.78793	0.398	9.45399	8	0.30546	9.34964	7	0.22852
ebi-a-GCST90001745	28	0.253	1.06435	0.95862-1.1818	0.423	0.96361	0.88014-1.05500	0.452	0.97521	0.91349-1.04111	0.691	1.03267	0.88264-1.20821	0.672	0.97485	0.86744-1.09557	-0.02879	0.05246	0.111	36.4203	27	0.10641	31.4281	26	0.21271
ebi-a-GCST90001708	23	0.871	1.00651	0.93182-1.0872	0.116	0.95343	0.89832-1.01193	0.455	1.02138	0.96628-1.07962	0.986	0.99881	0.87552-1.13947	0.112	0.95304	0.90024-1.00894	0.00964	0.59069	0.008	46.6747	22	0.00162	46.0209	21	0.00127
ebi-a-GCST90001813	21	0.163	1.064	0.97854-1.1569	0.478	1.03029	0.94881-1.11875	0.455	1.02139	0.96621-1.07972	0.354	0.9391	0.82490-1.06912	0.418	1.03783	0.95041-1.13329	-0.01893	0.21649	0.78	14.9658	20	0.77836	13.3313	19	0.82119
ebi-a-GCST90001863	15	0.841	1.01861	0.85396-1.2150	0.311	1.05309	0.95289-1.16384	0.455	1.03096	0.95166-1.11687	0.547	1.04862	0.90204-1.21901	0.547	1.03469	0.92859-1.15292	0.00352	0.88161	0.288	17.7264	14	0.21953	17.695	13	0.16945
ebi-a-GCST90001793	19	0.4	0.92701	0.78043-1.1011	0.144	0.92315	0.82917-1.02778	0.457	0.96716	0.88572-1.05608	0.241	0.90613	0.77266-1.06265	0.126	0.91128	0.81341-1.02091	0.00919	0.5791	0.179	23.5011	18	0.17206	23.0671	17	0.14708
ebi-a-GCST90001541	23	0.969	0.99814	0.91007-1.0947	0.907	0.9946	0.90786-1.08962	0.457	1.02341	0.96286-1.08776	0.75	0.97718	0.84942-1.12416	0.761	0.98661	0.90540-1.07510	0.00778	0.48781	0.586	20.7816	22	0.53427	20.2829	21	0.50341
ebi-a-GCST90001820	21	0.237	0.95517	0.88736-1.0282	0.313	0.96729	0.90679-1.03182	0.462	0.98254	0.93752-1.02973	0.825	1.01422	0.89661-1.14725	0.254	0.96485	0.90887-1.02428	0.01306	0.34159	0.58	17.9115	20	0.59324	16.9599	19	0.59258
ebi-a-GCST90001701	12	0.899	0.99069	0.86029-1.1409	0.902	0.9934	0.89395-1.10391	0.463	0.97224	0.90176-1.04823	0.968	0.99657	0.84358-1.17730	0.961	0.99657	0.86963-1.14204	-0.00874	0.75982	0.334	12.001	11	0.36357	11.8837	10	0.29292
ebi-a-GCST90001692	20	0.788	1.00297	0.98176-1.0246	0.926	0.99869	0.97163-1.02651	0.464	1.00708	0.98824-1.02628	0.916	0.99765	0.95551-1.04166	0.534	1.00641	0.98668-1.02654	0.00772	0.43455	0.877	11.8429	19	0.89223	11.2041	18	0.8855
ebi-a-GCST90002013	12	0.315	0.96925	0.91475-1.0270	0.551	0.98394	0.93288-1.03779	0.467	0.9831	0.93897-1.02929	1	0.99999	0.88998-1.12361	0.487	0.9812	0.93173-1.03329	0.01099	0.43594	0.4	13.1455	11	0.28392	12.3332	10	0.26338
ebi-a-GCST90001391	13	0.842	1.01791	0.85806-1.2075	0.358	0.94514	0.83808-1.06589	0.47	1.04115	0.93321-1.16157	0.364	0.92226	0.77951-1.09114	0.355	0.93117	0.80522-1.07681	0.00883	0.7352	0.029	24.6946	12	0.01634	24.4273	11	0.01105
ebi-a-GCST90001622	29	0.551	1.02344	0.94920-1.1035	0.384	1.03543	0.95741-1.11981	0.471	0.98161	0.93326-1.03247	0.344	0.93464	0.81444-1.07259	0.508	1.02683	0.95041-1.10939	-0.0146	0.15458	0.952	14.754	28	0.98092	12.609	27	0.99152
ebi-a-GCST90001770	6	0.522	0.9102	0.69949-1.1844	0.727	0.96894	0.81147-1.15698	0.472	0.94856	0.82146-1.09534	0.76	0.96079	0.75389-1.22448	0.698	0.95732	0.77736-1.17895	0.00938	0.73223	0.878	1.86781	5	0.86712	1.73314	4	0.78469
ebi-a-GCST90002030	21	0.025	1.18039	1.03297-1.3489	0.364	1.03759	0.95819-1.12357	0.472	1.02507	0.95817-1.09665	0.828	0.98575	0.86773-1.11983	0.385	1.03506	0.95933-1.11677	-0.04919	0.0309	0.099	29.393	20	0.08031	22.8551	19	0.24378
ebi-a-GCST90001941	10	0.407	1.0207	0.97494-1.0686	0.33	1.02795	0.97243-1.08664	0.473	1.01448	0.97541-1.05511	0.674	1.02454	0.91831-1.14306	0.368	1.02205	0.97697-1.06921	-0.00862	0.62579	0.479	8.27772	9	0.50642	8.01997	8	0.43152
ebi-a-GCST90001607	13	0.88	0.96713	0.63344-1.4766	0.764	1.0221	0.88634-1.17865	0.474	1.05779	0.90696-1.23369	0.937	1.00876	0.81721-1.24521	0.995	0.99945	0.84919-1.17631	0.01698	0.66292	0.002	30.8067	12	0.00211	30.2549	11	0.00144
ebi-a-GCST90001799	20	0.221	0.91476	0.79717-1.0497	0.517	0.96941	0.88241-1.06499	0.478	0.97656	0.91467-1.04263	0.866	1.01332	0.87082-1.17914	0.514	0.96521	0.86963-1.07129	0.02151	0.30414	0.372	20.8224	19	0.3467	19.6038	18	0.35556
ebi-a-GCST90001839	18	0.978	1.00138	0.91024-1.1016	0.657	1.0216	0.92972-1.12256	0.478	1.02359	0.95976-1.09166	0.885	0.99026	0.86908-1.12834	0.684	1.01739	0.93762-1.10396	0.00767	0.55006	0.737	13.8451	17	0.67803	13.4723	16	0.63796
ebi-a-GCST90001618	27	0.842	1.00553	0.95298-1.0610	0.919	0.9972	0.94474-1.05257	0.478	0.98657	0.95037-1.02414	0.499	0.97222	0.89703-1.05371	0.901	0.99681	0.94858-1.04749	-0.00963	0.34203	0.757	21.4431	26	0.71874	20.505	25	0.71986
ebi-a-GCST90001573	24	0.529	0.97227	0.89205-1.0597	0.634	0.98023	0.90281-1.06428	0.48	0.98015	0.92713-1.03620	0.766	0.98157	0.86970-1.10783	0.582	0.979	0.90873-1.05470	0.00267	0.81075	0.549	22.5531	23	0.4871	22.4931	22	0.43081
ebi-a-GCST90001748	25	0.964	0.99793	0.91310-1.0906	0.7	0.98465	0.91011-1.06530	0.484	0.978	0.91897-1.04082	0.246	1.11158	0.93373-1.32332	0.748	0.98782	0.91750-1.06352	-0.00788	0.53377	0.145	33.4249	24	0.09542	32.8548	23	0.08363
ebi-a-GCST90001926	25	0.013	0.85195	0.75792-0.9577	0.028	0.91441	0.84436-0.99027	0.486	0.96892	0.88657-1.05891	0.345	0.93262	0.80925-1.07479	0.019	0.90439	0.83656-0.97773	0.05057	0.00834	<0.001	59.5454	24	7e-05	43.7174	23	0.00569
ebi-a-GCST90002101	13	0.291	1.12356	0.91437-1.3806	0.403	1.05515	0.93051-1.19648	0.489	1.03512	0.93874-1.14139	0.762	1.02901	0.85858-1.23328	0.504	1.05275	0.90953-1.21853	-0.02017	0.39455	0.67	10.1934	12	0.599	9.40832	11	0.58426
ebi-a-GCST90001696	43	0.076	1.00107	0.99992-1.0022	0.273	1.00086	0.99933-1.00239	0.49	1.00035	0.99935-1.00135	0.318	1.00116	0.99892-1.00341	0.277	1.00077	0.99940-1.00214	-0.01889	0.02903	0.302	44.8246	42	0.35422	39.7054	41	0.52814
ebi-a-GCST90001405	20	0.694	0.98653	0.92306-1.0544	0.454	0.9778	0.92200-1.03698	0.491	0.98119	0.92962-1.03562	0.585	0.96956	0.86937-1.08129	0.562	0.9854	0.93844-1.03472	-0.00389	0.7763	0.087	30.3129	19	0.04795	30.1734	18	0.03579
ebi-a-GCST90001690	46	0.26	0.9919	0.97814-1.0059	0.808	0.99809	0.98285-1.01358	0.491	0.99566	0.98341-1.00806	0.896	0.99884	0.98162-1.01635	0.483	0.99483	0.98064-1.00923	0.01029	0.26321	0.062	60.8205	45	0.05786	59.0954	44	0.06372
ebi-a-GCST90001773	30	0.459	0.98054	0.93153-1.0321	0.488	0.97995	0.92549-1.03761	0.492	0.98702	0.95091-1.02450	0.923	0.9951	0.90106-1.09896	0.419	0.97639	0.92219-1.03378	0.0033	0.71179	0.452	29.1532	29	0.45711	29.0088	28	0.41208
ebi-a-GCST90001727	18	0.911	0.99802	0.96448-1.0327	0.616	1.01	0.97150-1.05003	0.493	1.01027	0.98121-1.04019	0.667	0.9755	0.87300-1.09003	0.842	1.00335	0.97139-1.03636	0.01303	0.19742	0.585	15.7679	17	0.54034	13.9593	16	0.60175
ebi-a-GCST90002083	18	0.885	1.01304	0.85258-1.2037	0.552	1.03352	0.92710-1.15217	0.495	1.03073	0.94495-1.12431	0.665	1.04505	0.85886-1.27160	0.519	1.03853	0.92792-1.16233	0.00425	0.82085	0.073	26.4415	17	0.06678	26.3542	16	0.04924
ebi-a-GCST90001987	28	0.984	1.00024	0.97770-1.0233	0.98	1.0004	0.97047-1.03125	0.495	1.00704	0.98694-1.02755	0.531	1.0166	0.96617-1.06965	0.791	1.00327	0.97960-1.02752	0.01068	0.22256	0.662	23.6	27	0.6524	22.0384	26	0.68659
ebi-a-GCST90001790	19	0.574	1.02278	0.94695-1.1047	0.488	1.02662	0.95318-1.10571	0.496	1.02008	0.96338-1.08011	0.854	1.01297	0.88441-1.16023	0.528	1.02189	0.95668-1.09155	-0.00131	0.91831	0.218	23.6657	18	0.16629	23.6506	17	0.12924
ebi-a-GCST90001617	17	0.491	1.01452	0.97470-1.0560	0.536	1.01376	0.97082-1.05859	0.496	1.01218	0.97753-1.04806	0.817	0.98813	0.89438-1.09171	0.54	1.01183	0.97529-1.04973	-0.00218	0.82191	0.776	12.9767	16	0.67446	12.9242	15	0.60815
ebi-a-GCST90001659	23	0.475	0.98028	0.92908-1.0343	0.831	0.99476	0.94802-1.04381	0.496	1.01519	0.97208-1.06021	0.008	1.1637	1.05186-1.28744	0.957	0.99873	0.95380-1.04577	0.0226	0.06223	0.177	30.2462	22	0.1126	25.5306	21	0.22491
ebi-a-GCST90001757	28	0.859	0.99821	0.97883-1.0180	0.632	0.99467	0.97312-1.01669	0.498	0.99369	0.97567-1.01205	0.332	1.04888	0.95417-1.15300	0.68	0.99598	0.97729-1.01502	-0.00865	0.24086	0.545	27.6777	27	0.42773	26.2246	26	0.45082
ebi-a-GCST90001394	23	0.856	0.99666	0.96176-1.0328	0.803	1.0049	0.96700-1.04428	0.499	0.98953	0.95977-1.02021	0.929	1.00412	0.91835-1.09789	0.661	1.00681	0.97710-1.03742	-0.00868	0.44173	0.247	27.2555	22	0.20168	26.4802	21	0.18873
ebi-a-GCST90001432	19	0.826	1.02054	0.85387-1.2198	0.244	1.06929	0.95532-1.19685	0.504	1.035	0.93561-1.14494	0.674	1.03734	0.87694-1.22708	0.343	1.06133	0.94145-1.19649	0.00378	0.8515	0.026	32.3521	18	0.01997	32.2835	17	0.01387
ebi-a-GCST90001819	20	0.845	0.9919	0.91510-1.0751	0.522	1.03013	0.94059-1.12820	0.505	1.01867	0.96474-1.07561	0.38	1.07883	0.91437-1.27289	0.15	0.92326	0.83185-1.02471	0.01231	0.39153	0.308	16.786	19	0.60437	16.0151	18	0.59149
ebi-a-GCST90001858	30	0.342	0.96968	0.91095-1.0322	0.844	0.99363	0.93229-1.05902	0.506	0.98589	0.94544-1.02807	0.702	1.02093	0.91915-1.13397	0.837	0.99382	0.93720-1.05386	0.00709	0.4859	0.414	30.8129	29	0.3743	30.2736	28	0.35026
ebi-a-GCST90001536	25	0.889	0.99835	0.97576-1.0215	0.699	1.00548	0.97807-1.03365	0.507	0.99325	0.97358-1.01332	0.861	1.00527	0.94829-1.06566	0.593	0.99409	0.97296-1.01567	-0.00836	0.37598	0.509	23.6356	24	0.48259	22.8205	23	0.47129
ebi-a-GCST90002039	21	0.945	1.00363	0.90711-1.1104	0.995	1.00024	0.92282-1.08416	0.508	1.0222	0.95786-1.09085	0.589	1.03961	0.90507-1.19415	0.857	1.00814	0.92404-1.09989	0.00698	0.64336	0.19	25.7825	20	0.17312	25.4856	19	0.14517
ebi-a-GCST90002028	20	0.57	0.98022	0.91609-1.0488	0.236	0.95448	0.88363-1.03102	0.51	0.98232	0.93153-1.03587	0.474	0.95234	0.83528-1.08581	0.317	0.96306	0.89635-1.03473	0.00113	0.92169	0.991	6.64429	19	0.99588	6.63435	18	0.99286
ebi-a-GCST90001442	22	0.508	1.01352	0.97467-1.0539	0.527	1.01318	0.97290-1.05514	0.513	1.01128	0.97785-1.04585	0.059	1.10578	1.00200-1.22030	0.478	1.01215	0.97952-1.04587	-0.00245	0.81799	0.282	26.7736	21	0.17848	26.701	20	0.14389
ebi-a-GCST90002009	21	0.666	1.01104	0.96256-1.0620	0.985	0.99953	0.95297-1.04836	0.513	0.98805	0.95308-1.02431	0.803	1.01235	0.92066-1.11317	0.979	1.00064	0.95560-1.04780	-0.01656	0.1932	0.572	19.4827	20	0.49068	17.663	19	0.54504
ebi-a-GCST90001518	24	0.197	1.01713	0.99197-1.0429	0.929	1.0014	0.97114-1.03261	0.513	1.00709	0.98597-1.02867	0.984	1.00044	0.95932-1.04333	0.856	1.0028	0.97320-1.03330	-0.01356	0.15939	0.841	15.769	23	0.86498	13.6477	22	0.91351
ebi-a-GCST90001841	21	0.521	1.02396	0.95384-1.0992	0.459	1.02194	0.96485-1.08240	0.516	1.01628	0.96800-1.06697	0.435	1.04228	0.94130-1.15411	0.434	1.02024	0.97132-1.07164	-0.00426	0.77331	0.143	28.5647	20	0.09669	28.4369	19	0.07537
ebi-a-GCST90002048	14	0.504	0.97226	0.89746-1.0533	0.121	0.94085	0.87111-1.01616	0.516	0.98271	0.93232-1.03582	0.441	0.9406	0.80866-1.09407	0.126	0.92979	0.85205-1.01462	0.0061	0.72917	0.4	12.7796	13	0.46498	12.6471	12	0.3952
ebi-a-GCST90001629	24	0.934	0.99612	0.90971-1.0907	0.377	1.03531	0.95858-1.11819	0.516	1.0185	0.96368-1.07643	0.079	1.10912	0.99309-1.23870	0.318	1.03681	0.96724-1.11139	0.00727	0.55108	0.659	20.1707	23	0.6316	19.8041	22	0.59529
ebi-a-GCST90001697	148	0.688	1.00023	0.99909-1.0014	0.483	1.00051	0.99909-1.00192	0.517	0.99972	0.99886-1.00057	0.504	1.00078	0.99850-1.00306	0.566	1.00035	0.99917-1.00152	-0.01032	0.18048	0.917	125.227	147	0.90306	123.416	146	0.91263
ebi-a-GCST90002074	19	0.975	0.99825	0.89485-1.1136	0.434	0.9663	0.88677-1.05296	0.519	0.97811	0.91449-1.04616	0.343	0.92264	0.78457-1.08501	0.295	0.9538	0.87530-1.03934	-0.00682	0.64446	0.259	22.1578	18	0.22506	21.8738	17	0.18962
ebi-a-GCST90001914	19	0.635	1.02221	0.93517-1.1174	0.222	1.05407	0.96870-1.14697	0.52	1.02112	0.95816-1.08821	0.574	1.04527	0.89838-1.21618	0.261	1.04811	0.96810-1.13474	-0.00045	0.97343	0.829	12.4329	18	0.8241	12.4317	17	0.77332
ebi-a-GCST90001582	23	0.509	1.01621	0.96965-1.0650	0.373	1.02213	0.97406-1.07259	0.524	1.01278	0.97398-1.05312	0.612	1.03122	0.91723-1.15937	0.34	1.02124	0.97900-1.06531	-0.00256	0.79048	0.363	24.8507	22	0.30427	24.7653	21	0.25747
ebi-a-GCST90001632	23	0.964	1.00383	0.85019-1.1852	0.991	0.99933	0.89083-1.12104	0.53	1.03095	0.93737-1.13386	0.569	1.05232	0.88534-1.25080	0.557	1.03474	0.92486-1.15768	0.00674	0.7022	0.041	35.2442	22	0.03653	34.9938	21	0.02828
ebi-a-GCST90001460	24	0.573	0.98084	0.91791-1.0481	0.652	0.9846	0.92035-1.05334	0.533	1.01537	0.96779-1.06528	0.81	0.98702	0.88840-1.09660	0.844	0.99259	0.92232-1.06822	0.01674	0.16226	0.352	25.3316	23	0.33342	23.1328	22	0.39426
ebi-a-GCST90001927	21	0.899	1.00993	0.86893-1.1738	0.66	0.97401	0.86613-1.09532	0.534	0.97479	0.89946-1.05643	0.451	0.93497	0.78770-1.10979	0.464	0.9545	0.84470-1.07856	-0.0083	0.58855	0.225	25.6204	20	0.17872	25.2185	19	0.15348
ebi-a-GCST90001958	13	0.495	1.04663	0.92229-1.1877	0.966	0.99775	0.90009-1.10601	0.537	0.97074	0.88350-1.06660	0.769	1.03236	0.83862-1.27087	0.955	1.00303	0.90402-1.11289	-0.02734	0.13156	0.047	21.8523	12	0.03921	17.6046	11	0.09122
ebi-a-GCST90001957	19	0.409	0.96785	0.89728-1.0440	0.373	0.98305	0.94680-1.02069	0.539	0.98527	0.93966-1.03309	0.174	0.92925	0.83936-1.02875	0.321	0.98146	0.94684-1.01736	0.01189	0.55684	0.024	40.2841	18	0.00191	39.4505	17	0.00155
ebi-a-GCST90001402	11	0.969	1.00403	0.82155-1.2271	0.278	1.07261	0.94497-1.21750	0.54	0.96053	0.84439-1.09264	0.276	1.12412	0.92106-1.37195	0.263	1.08497	0.94825-1.24139	-0.01545	0.57648	0.024	22.7603	10	0.01167	21.9417	9	0.00907
ebi-a-GCST90001637	27	0.139	0.90171	0.78977-1.0295	0.854	0.99057	0.89577-1.09540	0.542	0.97782	0.90975-1.05099	0.908	1.00994	0.85600-1.19156	0.633	0.97235	0.86785-1.08943	0.02257	0.16873	0.275	29.8241	26	0.27496	27.6059	25	0.32631
ebi-a-GCST90001463	20	0.239	0.95324	0.88257-1.0296	0.325	0.96497	0.89878-1.03603	0.543	0.9826	0.92860-1.03973	0.903	0.99257	0.88127-1.11793	0.411	0.97522	0.91974-1.03404	0.016	0.27477	0.242	24.3664	19	0.18247	22.7618	18	0.19991
ebi-a-GCST90001821	28	0.63	0.9735	0.87390-1.0844	0.31	0.96418	0.89855-1.03460	0.543	0.98094	0.92198-1.04367	0.204	0.90421	0.77698-1.05228	0.222	0.96151	0.90410-1.02256	0.00242	0.86591	0.013	48.2534	27	0.00719	48.1995	26	0.00512
ebi-a-GCST90001397	28	0.101	1.05383	0.99198-1.1195	0.754	1.00926	0.95264-1.06925	0.543	0.98414	0.93473-1.03617	0.528	1.03486	0.93164-1.14953	0.623	1.01336	0.96176-1.06773	-0.03083	0.00316	0.069	40.5095	27	0.04588	28.7941	26	0.32053
ebi-a-GCST90001585	20	0.356	1.06285	0.93680-1.2059	0.278	1.05534	0.95746-1.16322	0.544	1.02284	0.95084-1.10029	0.954	1.0057	0.83118-1.21687	0.354	1.05105	0.94836-1.16485	-0.0133	0.47465	0.524	18.188	19	0.50991	17.6548	18	0.4786
ebi-a-GCST90001761	27	0.862	1.00843	0.91803-1.1077	0.831	1.0088	0.93063-1.09354	0.545	0.98289	0.92947-1.03939	0.608	0.96086	0.82630-1.11733	0.737	1.0169	0.92298-1.12038	-0.00846	0.50896	0.239	30.0916	26	0.26384	29.5607	25	0.24116
ebi-a-GCST90001661	21	0.69	0.98279	0.90353-1.0690	0.772	1.01302	0.92812-1.10569	0.549	1.01745	0.96151-1.07664	0.305	1.08199	0.93422-1.25314	0.947	1.00271	0.92696-1.08465	0.01315	0.28879	0.574	18.2681	20	0.56975	17.0772	19	0.58464
ebi-a-GCST90001954	19	0.969	0.99923	0.96149-1.0385	0.469	1.01352	0.97734-1.05103	0.551	1.0086	0.98063-1.03736	0.66	0.98226	0.90823-1.06232	0.681	1.00589	0.97860-1.03394	0.01025	0.48916	0.197	24.819	18	0.12998	24.1101	17	0.11647
ebi-a-GCST90001782	19	0.889	1.00296	0.96288-1.0447	0.42	0.98247	0.94117-1.02558	0.552	0.99036	0.95926-1.02247	0.494	0.97499	0.90813-1.04678	0.754	0.99362	0.95519-1.03358	-0.01168	0.34285	0.68	15.3345	18	0.63888	14.3824	17	0.63987
ebi-a-GCST90001616	15	0.649	1.014	0.95645-1.0750	0.63	1.01301	0.96106-1.06776	0.553	1.01452	0.96734-1.06400	0.98	0.99768	0.83095-1.19785	0.646	1.01216	0.96239-1.06451	0.00039	0.97466	0.583	15.5965	14	0.33863	15.5953	13	0.27168
ebi-a-GCST90001968	19	0.183	1.10486	0.95964-1.2721	0.127	1.08054	0.97818-1.19362	0.553	1.02418	0.94643-1.10833	0.603	0.95527	0.80656-1.13141	0.191	1.09043	0.96238-1.23551	-0.0233	0.22331	0.148	24.7588	18	0.1317	22.632	17	0.16162
ebi-a-GCST90001553	22	0.999	1.00004	0.93361-1.0712	0.956	1.00222	0.92672-1.08387	0.554	1.01741	0.96093-1.07721	0.384	1.06314	0.92889-1.21679	0.846	1.00671	0.94200-1.07587	0.00862	0.38814	0.948	11.7789	21	0.9454	11.0006	20	0.94621
ebi-a-GCST90001989	24	0.393	0.97239	0.91298-1.0357	0.477	0.97787	0.91938-1.04008	0.554	0.98674	0.94407-1.03134	0.592	0.97073	0.87224-1.08034	0.985	0.99957	0.95588-1.04527	0.00987	0.52423	0.018	38.3399	23	0.02341	37.6236	22	0.02018
ebi-a-GCST90001631	25	0.767	1.01927	0.89977-1.1546	0.943	1.00385	0.90278-1.11622	0.555	1.02167	0.95141-1.09712	0.356	1.07905	0.92106-1.26414	0.518	1.04229	0.92101-1.17953	0.00059	0.96441	0.63	20.9388	24	0.64233	20.9367	23	0.58495
ebi-a-GCST90001519	18	0.495	1.02721	0.95260-1.1077	0.974	1.00119	0.93263-1.07478	0.556	1.01493	0.96612-1.06621	0.789	0.98534	0.88588-1.09596	0.965	1.00163	0.93196-1.07650	-0.00534	0.68511	0.958	8.70159	17	0.94916	8.53104	16	0.93146
ebi-a-GCST90001956	20	0.373	0.96923	0.90637-1.0364	0.447	0.98596	0.95063-1.02259	0.556	0.98712	0.94545-1.03063	0.249	0.9465	0.86448-1.03631	0.319	0.98074	0.94489-1.01796	0.01269	0.48967	0.034	37.6264	19	0.00662	36.6146	18	0.00588
ebi-a-GCST90001414	16	0.51	0.95801	0.84601-1.0848	0.97	0.9978	0.88871-1.12028	0.556	0.97603	0.90022-1.05822	0.214	0.88822	0.74248-1.06256	0.913	0.99345	0.88408-1.11634	0.0062	0.70478	0.556	13.5723	15	0.55818	13.4228	14	0.49354
ebi-a-GCST90001481	28	0.598	1.00929	0.97563-1.0441	0.249	1.02391	0.98356-1.06591	0.557	1.00798	0.98160-1.03507	0.317	1.03706	0.96702-1.11218	0.231	1.01918	0.98870-1.05059	-0.00154	0.90286	0.426	26.6969	27	0.48024	26.6813	26	0.42619
ebi-a-GCST90001949	19	0.523	0.97167	0.89119-1.0594	0.439	0.98349	0.94287-1.02587	0.558	0.98435	0.93375-1.03768	0.489	0.96077	0.85982-1.07358	0.359	0.98012	0.94003-1.02192	0.00724	0.71104	0.017	39.9877	18	0.0021	39.6566	17	0.00145
ebi-a-GCST90001951	16	0.046	0.91809	0.85035-0.9912	0.381	0.98006	0.93689-1.02521	0.558	0.9864	0.94221-1.03266	0.243	0.93596	0.84116-1.04144	0.37	0.97746	0.93127-1.02593	0.04179	0.04746	0.107	24.3293	15	0.05971	18.1943	14	0.19807
ebi-a-GCST90002000	21	0.922	1.00409	0.92613-1.0886	0.8	0.99016	0.91736-1.06874	0.558	0.98129	0.92114-1.04537	0.538	0.94571	0.79424-1.12608	0.719	0.98722	0.92141-1.05774	-0.01094	0.3787	0.244	25.66	20	0.17734	24.6078	19	0.17386
ebi-a-GCST90001794	24	0.541	0.98697	0.94696-1.0287	0.256	0.9719	0.92528-1.02088	0.56	0.9899	0.95667-1.02428	0.509	1.03373	0.93820-1.13900	0.326	0.97944	0.94052-1.01998	0.00275	0.80566	0.513	22.128	23	0.51254	22.0658	22	0.45597
ebi-a-GCST90001527	24	0.967	1.00097	0.95659-1.0474	0.512	1.01644	0.96812-1.06717	0.56	0.98896	0.95271-1.02660	0.935	0.99568	0.89865-1.10319	0.822	1.0047	0.96491-1.04613	-0.00964	0.36447	0.17	30.2751	23	0.14167	29.1393	22	0.14093
ebi-a-GCST90001715	12	0.432	0.96984	0.90128-1.0436	0.582	0.98488	0.93285-1.03981	0.563	0.98433	0.93308-1.03840	0.389	1.06136	0.93175-1.20899	0.074	0.94654	0.89636-0.99953	0.01306	0.5613	0.198	17.3452	11	0.09807	16.7408	10	0.0803
ebi-a-GCST90001872	19	0.901	0.99692	0.95018-1.0459	0.245	1.0237	0.98409-1.06489	0.565	1.00952	0.97745-1.04264	0.635	1.02279	0.93339-1.12076	0.223	1.02491	0.98650-1.06482	0.00926	0.49269	0.167	24.3585	18	0.14363	23.6738	17	0.12857
ebi-a-GCST90001849	22	0.889	1.00734	0.90983-1.1153	0.701	0.98586	0.91671-1.06023	0.567	0.98367	0.92975-1.04071	0.538	0.96436	0.86077-1.08041	0.74	0.98566	0.90603-1.07228	-0.00679	0.58856	0.972	11.0046	21	0.9627	10.7024	20	0.95358
ebi-a-GCST90001515	20	0.568	1.03516	0.92139-1.1630	0.306	1.03962	0.96505-1.11995	0.568	1.01744	0.95878-1.07968	0.383	1.05558	0.93738-1.18868	0.351	1.04204	0.95771-1.13379	-0.00578	0.73714	0.21	24.5184	19	0.17701	24.3611	18	0.14355
ebi-a-GCST90001479	13	0.231	1.07013	0.96357-1.1885	0.172	1.07203	0.97027-1.18446	0.571	1.02115	0.94987-1.09777	0.882	0.98713	0.83540-1.16643	0.359	1.04986	0.95000-1.16022	-0.01683	0.25191	0.578	10.4464	12	0.57686	8.98403	11	0.62337
ebi-a-GCST90001544	14	0.694	0.98215	0.89969-1.0722	0.973	1.00141	0.92228-1.08732	0.572	0.98279	0.92530-1.04384	0.152	1.10915	0.97058-1.26751	0.892	0.99421	0.91549-1.07969	0.00028	0.98439	0.664	10.3468	13	0.66536	10.3463	12	0.5856
ebi-a-GCST90001571	22	0.488	1.04048	0.93203-1.1615	0.799	1.01147	0.92644-1.10431	0.575	1.01888	0.95434-1.08778	0.67	1.0288	0.90459-1.17008	0.58	1.0262	0.93763-1.12314	-0.00643	0.64728	0.969	10.8045	21	0.96646	10.5887	20	0.9562
ebi-a-GCST90001533	18	0.736	1.02439	0.89270-1.1755	0.329	0.96193	0.88986-1.03983	0.576	0.98126	0.91833-1.04851	0.463	0.94716	0.82191-1.09151	0.338	0.95399	0.86871-1.04764	-0.01344	0.49249	0.057	26.9172	17	0.05929	26.112	16	0.05247
ebi-a-GCST90001494	23	0.41	1.01883	0.97545-1.0641	0.851	1.00469	0.95693-1.05484	0.579	1.01029	0.97437-1.04754	0.26	0.94375	0.85550-1.04111	0.836	1.00477	0.96106-1.05047	-0.00616	0.50184	0.58	20.9211	22	0.52562	20.4541	21	0.49268
ebi-a-GCST90002062	17	0.371	0.94524	0.83853-1.0655	0.645	0.97651	0.88272-1.08027	0.581	0.98058	0.91467-1.05123	0.773	0.97913	0.85021-1.12759	0.677	0.97913	0.88835-1.07919	0.01121	0.47195	0.815	11.6062	16	0.77062	11.0617	15	0.74821
ebi-a-GCST90002106	15	0.372	1.03498	0.96221-1.1133	0.578	1.01543	0.96211-1.07170	0.581	1.0125	0.96881-1.05817	0.838	1.01041	0.91644-1.11401	0.707	1.01041	0.95841-1.06523	-0.0113	0.47168	0.634	12.5621	14	0.56125	12.0126	13	0.52661
ebi-a-GCST90001438	14	0.654	1.05351	0.84351-1.3158	0.907	1.00953	0.86139-1.18314	0.583	0.96532	0.85104-1.09494	0.813	1.0274	0.82474-1.27987	0.813	1.01911	0.87391-1.18844	-0.01899	0.36693	0.121	20.5125	13	0.08315	19.1123	12	0.08585
ebi-a-GCST90002068	24	0.908	0.99511	0.91633-1.0807	0.74	0.98745	0.91653-1.06385	0.583	1.01427	0.96423-1.06691	0.938	1.00441	0.89923-1.12190	0.978	1.00121	0.92155-1.08775	0.00788	0.57172	0.526	22.2289	23	0.50647	21.8993	22	0.46591
ebi-a-GCST90001584	21	0.617	0.96453	0.83929-1.1084	0.297	0.94833	0.85827-1.04784	0.586	1.02604	0.93540-1.12547	0.511	0.94674	0.80645-1.11143	0.267	0.93676	0.83748-1.04781	0.01853	0.26085	0.03	34.5459	20	0.02266	32.2651	19	0.02917
ebi-a-GCST90001436	25	0.217	1.02907	0.98454-1.0756	0.342	1.01989	0.97932-1.06214	0.588	1.011	0.97180-1.05178	0.517	1.04423	0.91791-1.18793	0.235	1.02376	0.98580-1.06318	-0.01621	0.12834	0.186	34.6571	24	0.07365	31.2734	23	0.11622
ebi-a-GCST90001723	25	0.365	1.04887	0.94790-1.1606	0.185	1.06352	0.97104-1.16480	0.59	1.01831	0.95322-1.08784	0.435	1.06252	0.91467-1.23428	0.384	1.04585	0.94722-1.15475	-0.00982	0.45459	0.153	30.5306	24	0.16778	29.7814	23	0.15578
ebi-a-GCST90001843	16	0.746	1.01622	0.92369-1.1180	0.365	1.035	0.96077-1.11497	0.591	1.01684	0.95677-1.08068	0.445	1.05259	0.92614-1.19631	0.439	1.02813	0.96010-1.10099	0.00028	0.9869	0.199	20.611	15	0.14972	20.6106	14	0.11204
ebi-a-GCST90002012	16	0.464	0.96588	0.88247-1.0572	0.221	0.94449	0.86203-1.03484	0.594	0.98324	0.92402-1.04627	0.634	0.96018	0.81526-1.13088	0.319	0.96018	0.88880-1.03730	0.00679	0.59441	0.346	16.4334	15	0.35384	16.0922	14	0.30778
ebi-a-GCST90001837	16	0.484	1.05321	0.91439-1.2131	0.972	0.99858	0.92127-1.08239	0.594	1.01526	0.96024-1.07343	0.871	0.98881	0.86541-1.12980	0.855	0.98761	0.86621-1.12601	-0.01082	0.58851	0.77	10.3024	15	0.8003	9.99579	14	0.76249
ebi-a-GCST90001643	26	0.381	1.02124	0.97521-1.0694	0.94	1.00199	0.95135-1.05532	0.596	1.00988	0.97388-1.04721	0.559	1.02815	0.93786-1.12713	0.48	1.01602	0.97280-1.06115	-0.00778	0.4483	0.679	21.8269	25	0.64572	21.2326	24	0.62497
ebi-a-GCST90002077	23	0.125	0.95089	0.89392-1.0115	0.528	0.97957	0.91876-1.04442	0.596	0.9869	0.93998-1.03617	0.084	1.09892	0.99208-1.21726	0.313	0.96769	0.90923-1.02990	0.01975	0.08801	0.182	27.6472	22	0.18767	23.99	21	0.29354
ebi-a-GCST90001599	14	0.603	0.9409	0.75226-1.1768	0.976	1.00197	0.88083-1.13978	0.596	0.97429	0.88481-1.07283	0.913	1.01236	0.81596-1.25602	0.834	1.02061	0.84676-1.23016	0.00649	0.74085	0.875	7.63567	13	0.8665	7.52111	12	0.82135
ebi-a-GCST90001749	13	0.391	1.0598	0.93284-1.2040	0.179	1.06338	0.97227-1.16302	0.598	1.01845	0.95157-1.09002	0.339	1.07731	0.93048-1.24731	0.265	1.07838	0.95018-1.22388	-0.01318	0.48527	0.946	4.6971	12	0.96734	4.1756	11	0.9645
ebi-a-GCST90001709	22	0.459	0.97659	0.91840-1.0385	0.098	0.96034	0.91535-1.00755	0.599	1.01357	0.96390-1.06579	0.986	1.00091	0.90557-1.10629	0.076	0.96509	0.92975-1.00177	0.03308	0.07624	<0.001	52.9358	21	0.00014	45.0598	20	0.00108
ebi-a-GCST90001734	16	0.235	0.93185	0.83364-1.0416	0.778	0.98643	0.89704-1.08472	0.6	0.98093	0.91287-1.05406	0.951	0.99524	0.85604-1.15708	0.789	0.98715	0.89936-1.08352	0.01901	0.25666	0.778	11.6258	15	0.7071	10.2273	14	0.74539
ebi-a-GCST90001408	26	0.839	0.98958	0.89546-1.0936	0.734	0.98508	0.90328-1.07428	0.6	0.98199	0.91749-1.05102	0.368	0.91867	0.76626-1.10140	0.788	0.9877	0.90357-1.07968	-0.00317	0.83579	<0.001	54.6953	25	0.00054	54.5954	24	0.00035
ebi-a-GCST90001768	21	0.543	0.97839	0.91309-1.0483	0.801	1.00786	0.94836-1.07109	0.602	1.01401	0.96234-1.06845	0.813	1.01363	0.90768-1.13194	0.784	1.00752	0.95571-1.06213	0.01919	0.15102	0.203	26.7653	20	0.142	23.944	19	0.19831
ebi-a-GCST90001679	14	0.834	1.01861	0.86074-1.2054	0.341	1.06084	0.93943-1.19794	0.602	1.02772	0.92732-1.13899	0.311	0.88617	0.70781-1.10947	0.183	1.11434	0.95837-1.29569	0.00311	0.89561	0.064	21.8346	13	0.05798	21.802	12	0.0398
ebi-a-GCST90001732	22	0.405	0.92291	0.76711-1.1104	0.446	1.05377	0.92090-1.20582	0.603	1.02553	0.93250-1.12785	0.635	1.05152	0.85735-1.28968	0.547	1.05152	0.89513-1.23525	0.02058	0.20975	0.251	25.0714	21	0.24409	23.1291	20	0.2825
ebi-a-GCST90001393	14	0.936	1.01432	0.72370-1.4217	0.351	0.92843	0.79434-1.08516	0.603	0.96739	0.85365-1.09627	0.29	0.85949	0.65693-1.12451	0.312	0.8999	0.73925-1.09546	-0.00776	0.77085	0.211	17.53	13	0.17619	17.4013	12	0.13511
ebi-a-GCST90001647	24	0.747	0.9881	0.91961-1.0617	0.97	0.99873	0.93501-1.06679	0.604	0.98678	0.93840-1.03765	0.789	0.98487	0.88193-1.09982	0.988	1.00055	0.93421-1.07160	-0.00058	0.95952	0.833	16.6872	23	0.82432	16.6845	22	0.78052
ebi-a-GCST90001498	17	0.567	1.06878	0.85530-1.3355	0.27	1.07899	0.94264-1.23506	0.604	1.02841	0.92500-1.14339	0.431	1.08897	0.88566-1.33896	0.371	1.08897	0.90833-1.30554	-0.00848	0.7033	0.141	22.8976	16	0.1165	22.6698	15	0.09141
ebi-a-GCST90002053	16	0.691	1.01025	0.96176-1.0612	0.956	1.0017	0.94301-1.06403	0.605	0.98971	0.95164-1.02931	0.721	1.0201	0.91638-1.13555	0.973	0.99927	0.95865-1.04161	-0.0155	0.21151	0.438	15.6649	15	0.40466	13.9506	14	0.4534
ebi-a-GCST90001785	25	0.772	0.97985	0.85539-1.1224	0.176	0.92773	0.83215-1.03429	0.606	0.98107	0.91237-1.05495	0.354	0.91238	0.75449-1.10332	0.238	0.91238	0.78637-1.05858	0.00028	0.98297	0.408	24.9898	24	0.40632	24.9892	23	0.35084
ebi-a-GCST90001413	16	0.496	0.97463	0.90685-1.0475	0.686	0.98357	0.90770-1.06578	0.608	1.01603	0.95607-1.07975	0.106	1.15594	0.97988-1.36364	0.361	0.96315	0.89085-1.04131	0.03027	0.08924	0.129	19.9465	15	0.174	16.1095	14	0.30673
ebi-a-GCST90002041	15	0.942	0.99019	0.76276-1.2854	0.502	0.96299	0.86253-1.07516	0.61	1.02804	0.92434-1.14337	0.457	0.93985	0.80168-1.10183	0.418	0.94715	0.83372-1.07602	0.01072	0.761	0.027	26.6491	14	0.02138	26.4527	13	0.01477
ebi-a-GCST90001652	24	0.532	1.03141	0.93756-1.1346	0.862	1.00739	0.92690-1.09487	0.613	1.01675	0.95333-1.08439	0.236	1.09757	0.94459-1.27532	0.699	1.01516	0.94145-1.09464	-0.00519	0.68939	0.193	30.3461	23	0.13972	30.1215	22	0.11554
ebi-a-GCST90001737	26	0.9	1.00258	0.96358-1.0432	0.774	1.00686	0.96100-1.05492	0.617	1.00843	0.97577-1.04219	0.991	1.0007	0.89202-1.12261	0.85	1.00351	0.96810-1.04021	0.00569	0.59893	0.426	26.5148	25	0.38055	26.2047	24	0.34286
ebi-a-GCST90001687	14	0.48	1.14916	0.79043-1.6707	0.979	0.99786	0.85359-1.16652	0.62	0.96948	0.85778-1.09573	0.896	0.98674	0.81040-1.20145	0.892	1.01267	0.84786-1.20951	-0.03101	0.36433	0.233	17.0746	13	0.19592	15.8968	12	0.19601
ebi-a-GCST90001796	11	0.751	0.97276	0.82434-1.1479	0.828	1.01342	0.89826-1.14335	0.621	1.02653	0.92546-1.13862	0.466	1.09252	0.86912-1.37334	0.913	1.0069	0.89267-1.13574	0.01744	0.43042	0.099	17.285	10	0.06829	16.0683	9	0.06547
ebi-a-GCST90002073	21	0.917	0.99566	0.91853-1.0793	0.451	0.97464	0.91170-1.04192	0.622	0.9881	0.94220-1.03624	0.117	1.08445	0.98417-1.19495	0.408	0.96938	0.90195-1.04185	-0.00362	0.82102	0.928	12.5647	20	0.89527	12.5121	19	0.86259
ebi-a-GCST90001598	20	0.223	1.13522	0.93218-1.3825	0.824	1.01419	0.89580-1.14821	0.623	0.97681	0.88951-1.07269	0.624	1.06235	0.83732-1.34785	0.503	1.05932	0.89790-1.24977	-0.02928	0.11069	0.182	24.5692	19	0.17522	21.2469	18	0.26714
ebi-a-GCST90001894	24	0.692	1.01698	0.93662-1.1042	0.302	0.961	0.89104-1.03645	0.625	1.01481	0.95668-1.07646	0.473	0.95772	0.85286-1.07546	0.656	0.98423	0.91859-1.05456	-0.00119	0.94109	0.007	44.7672	23	0.00424	44.7559	22	0.00285
ebi-a-GCST90001888	20	0.487	0.95877	0.85358-1.0769	0.632	0.97675	0.88703-1.07556	0.627	0.98217	0.91351-1.05599	0.428	1.0684	0.91042-1.25380	0.536	0.96977	0.88155-1.06681	0.00884	0.60466	0.033	32.6382	19	0.02645	32.1423	18	0.02115
ebi-a-GCST90001703	14	0.482	0.97671	0.91645-1.0409	0.502	0.98187	0.93086-1.03568	0.628	0.98858	0.94365-1.03564	0.346	1.05915	0.94387-1.18851	0.039	0.93847	0.88883-0.99088	0.00968	0.58433	0.206	16.6923	13	0.21375	16.2639	12	0.17944
ebi-a-GCST90002031	22	0.591	0.98754	0.94413-1.0329	0.868	0.99676	0.95940-1.03558	0.629	1.00829	0.97506-1.04265	0.588	1.02106	0.94808-1.09965	0.793	1.00474	0.97035-1.04033	0.01368	0.19822	0.355	25.146	21	0.2409	23.1003	20	0.2839
ebi-a-GCST90001633	25	0.17	0.94979	0.88439-1.0200	0.164	0.94945	0.88260-1.02135	0.631	0.98758	0.93850-1.03922	0.4	0.95001	0.84481-1.06832	0.238	0.95864	0.89531-1.02646	0.01683	0.14093	0.424	24.2318	24	0.44841	21.9066	23	0.52589
ebi-a-GCST90001848	15	0.524	0.93276	0.75749-1.1486	0.338	0.93704	0.82032-1.07036	0.631	0.97226	0.86682-1.09051	0.586	0.92337	0.69759-1.22224	0.162	0.88205	0.74672-1.04191	0.01178	0.64316	0.041	25.0708	14	0.03387	24.6444	13	0.02569
ebi-a-GCST90001917	23	0.858	0.99835	0.98071-1.0163	0.709	0.99564	0.97307-1.01873	0.632	0.99607	0.98013-1.01227	0.551	0.98955	0.95649-1.02376	0.702	0.99629	0.97773-1.01520	-0.00591	0.56093	0.526	20.8857	22	0.52781	20.5366	21	0.48754
ebi-a-GCST90001567	20	0.911	1.00556	0.91392-1.1064	0.976	1.0015	0.90901-1.10339	0.633	1.01711	0.94875-1.09040	0.924	1.00853	0.84964-1.19714	0.974	1.00153	0.91464-1.09667	0.00367	0.73647	0.637	17.5148	19	0.55503	17.398	18	0.49592
ebi-a-GCST90002057	15	0.118	0.91044	0.81560-1.0163	0.459	0.96751	0.88660-1.05581	0.633	0.98307	0.91647-1.05450	0.717	1.02465	0.90063-1.16576	0.536	0.9733	0.89525-1.05816	0.02495	0.11169	0.408	16.0943	14	0.30765	13.1491	13	0.43636
ebi-a-GCST90001744	10	0.521	1.04258	0.92317-1.1774	0.596	1.02798	0.92823-1.13845	0.634	1.0207	0.93808-1.11060	0.594	1.05568	0.87117-1.27926	0.53	1.03211	0.93881-1.13468	-0.00838	0.63308	0.621	9.12108	9	0.42617	8.84872	8	0.35522
ebi-a-GCST90001981	20	0.695	0.98825	0.93249-1.0473	0.524	1.01675	0.96606-1.07010	0.635	1.00837	0.97430-1.04363	0.935	0.99612	0.90840-1.09230	0.22	1.02845	0.98484-1.07399	0.01492	0.40801	0.329	19.5046	19	0.42492	18.7567	18	0.40695
ebi-a-GCST90001534	13	0.383	0.97509	0.92349-1.0296	0.21	0.96935	0.92333-1.01767	0.635	0.9886	0.94286-1.03657	0.238	1.07079	0.96122-1.19284	0.189	0.97197	0.93389-1.01161	0.01816	0.33498	0.234	23.8958	12	0.02101	21.8742	11	0.02537
ebi-a-GCST90001993	12	0.432	1.07972	0.89872-1.2972	0.652	1.03815	0.88222-1.22163	0.637	1.02809	0.91622-1.15361	0.91	1.01313	0.81270-1.26298	0.699	1.02968	0.89143-1.18937	-0.01401	0.50958	0.441	12.2585	11	0.34453	11.7108	10	0.30488
ebi-a-GCST90001499	24	0.813	0.99468	0.95229-1.0390	0.853	1.00407	0.96181-1.04819	0.638	1.00841	0.97389-1.04414	0.513	1.02945	0.94501-1.12143	0.802	1.00489	0.96770-1.04351	0.0101	0.31562	0.913	14.803	23	0.90156	13.7484	22	0.91017
ebi-a-GCST90001776	16	0.542	0.96561	0.86521-1.0777	0.774	0.98556	0.89224-1.08864	0.638	0.98205	0.91068-1.05901	0.842	1.01769	0.85904-1.20565	0.539	0.96745	0.87251-1.07271	0.00627	0.67662	0.294	17.9992	15	0.26271	17.769	14	0.21751
ebi-a-GCST90001809	18	0.701	0.95464	0.75652-1.2046	0.647	1.03338	0.89801-1.18917	0.638	1.02445	0.92637-1.13291	0.264	1.14481	0.91012-1.44001	0.246	1.13046	0.92561-1.38066	0.01349	0.51885	0.674	13.8309	17	0.67903	13.3958	16	0.64363
ebi-a-GCST90001646	24	0.257	0.97301	0.92918-1.0189	0.501	0.98235	0.93269-1.03466	0.643	0.99181	0.95789-1.02693	0.458	0.97035	0.89742-1.04921	0.44	0.9837	0.94415-1.02491	0.01485	0.22734	0.633	20.9201	23	0.58597	19.3777	22	0.6219
ebi-a-GCST90001508	23	0.883	0.99695	0.95784-1.0377	0.622	1.0116	0.96624-1.05909	0.645	1.00758	0.97575-1.04045	0.998	0.99992	0.92703-1.07853	0.789	1.00577	0.96485-1.04842	0.00942	0.39433	0.934	12.376	22	0.94912	11.6197	21	0.94932
ebi-a-GCST90001932	20	0.204	1.12668	0.94372-1.3451	0.67	1.02222	0.92388-1.13103	0.645	1.0217	0.93257-1.11936	0.758	0.97182	0.81268-1.16213	0.868	1.00938	0.90533-1.12539	-0.02812	0.22534	0.004	42.8692	19	0.00135	39.4172	18	0.0025
ebi-a-GCST90001810	18	0.123	1.08469	0.98361-1.1962	0.331	1.03929	0.96161-1.12324	0.645	1.0135	0.95731-1.07300	0.219	1.07769	0.96081-1.20878	0.435	1.037	0.94871-1.13352	-0.02625	0.12071	0.394	18.5687	17	0.35384	15.8822	16	0.46121
ebi-a-GCST90001505	21	0.058	1.11225	1.00291-1.2335	0.216	1.05713	0.96809-1.15437	0.646	0.97898	0.89411-1.07191	0.625	1.04386	0.88097-1.23686	0.111	1.06439	0.98911-1.14539	-0.04805	0.00287	0.002	43.6666	20	0.00167	27.0271	19	0.10402
ebi-a-GCST90002008	20	0.609	1.01	0.97289-1.0485	0.42	1.01822	0.97451-1.06389	0.647	1.00754	0.97567-1.04045	0.425	1.049	0.93495-1.17696	0.388	1.01536	0.98157-1.05031	-0.00298	0.80591	0.785	14.3107	19	0.76529	14.2485	18	0.71275
ebi-a-GCST90002099	24	0.327	0.97374	0.92435-1.0258	0.857	0.995	0.94238-1.05055	0.648	0.99084	0.95247-1.03076	0.447	1.03641	0.94661-1.13474	0.649	0.98756	0.93639-1.04152	0.01057	0.32549	0.417	24.397	23	0.38211	23.3246	22	0.3836
ebi-a-GCST90002044	8	0.997	0.9995	0.74108-1.3480	0.723	1.02295	0.90230-1.15972	0.649	1.02337	0.92652-1.13035	0.711	1.03331	0.87476-1.22060	0.889	1.01164	0.86478-1.18345	0.00514	0.87513	0.883	3.17527	7	0.86833	3.14838	6	0.79001
ebi-a-GCST90001535	24	0.897	0.99456	0.91641-1.0794	0.911	1.0045	0.92835-1.08690	0.649	1.01325	0.95735-1.07242	0.695	1.03009	0.88984-1.19244	0.73	1.01203	0.94645-1.08216	0.00659	0.53709	0.391	25.1918	23	0.34047	24.7495	22	0.3092
ebi-a-GCST90001906	19	0.319	0.93793	0.82994-1.0600	0.474	0.9649	0.87509-1.06394	0.65	1.01647	0.94723-1.09076	0.45	0.93327	0.78326-1.11201	0.494	0.95061	0.82455-1.09596	0.02413	0.13318	0.676	14.5579	18	0.69207	12.0704	17	0.79586
ebi-a-GCST90002011	9	0.64	1.17207	0.62049-2.2140	0.193	0.87032	0.70614-1.07267	0.653	0.96037	0.80523-1.14539	0.243	0.81004	0.58367-1.12419	0.219	0.81912	0.61110-1.09794	-0.03085	0.54191	0.14	12.4738	8	0.13128	11.7822	7	0.10795
ebi-a-GCST90001784	22	0.746	0.99137	0.94146-1.0439	0.242	0.96447	0.90779-1.02469	0.654	0.99087	0.95192-1.03141	0.723	0.98111	0.88401-1.08887	0.502	0.98111	0.92882-1.03633	-0.00036	0.976	0.601	17.6919	21	0.66841	17.691	20	0.60776
ebi-a-GCST90001908	23	0.435	1.05273	0.92753-1.1948	0.316	1.04475	0.95900-1.13817	0.655	1.01823	0.94063-1.10224	0.858	1.01354	0.87640-1.17214	0.288	1.05364	0.95912-1.15747	-0.01204	0.5121	0.002	47.5259	22	0.00125	46.5403	21	0.00108
ebi-a-GCST90001842	28	0.736	1.01	0.95384-1.0695	0.863	0.99509	0.94111-1.05217	0.655	1.00898	0.97012-1.04941	0.59	1.02663	0.93406-1.12839	0.763	0.99231	0.94419-1.04289	-0.00045	0.96235	0.795	20.9496	27	0.78864	20.9473	26	0.74468
ebi-a-GCST90001971	14	0.827	1.00997	0.92577-1.1018	0.617	0.97953	0.90327-1.06222	0.657	1.01618	0.94677-1.09067	0.644	1.04539	0.86961-1.25671	0.531	1.01961	0.96107-1.08172	0.00389	0.80169	0.133	21.8857	13	0.05716	21.7661	12	0.04023
ebi-a-GCST90001693	23	0.757	0.99596	0.97111-1.0214	0.852	0.99745	0.97101-1.02460	0.658	0.99495	0.97294-1.01747	0.198	0.95065	0.88220-1.02441	0.796	0.99692	0.97411-1.02027	-0.00151	0.8676	0.829	17.4477	22	0.73819	17.4192	21	0.6854
ebi-a-GCST90002070	26	0.642	1.01314	0.95962-1.0696	0.473	1.02097	0.96471-1.08051	0.658	1.00905	0.96957-1.05014	0.625	1.0206	0.94140-1.10645	0.627	1.01282	0.96272-1.06552	-0.00244	0.83113	0.856	17.8291	25	0.84956	17.7826	24	0.81343
ebi-a-GCST90001627	33	0.316	0.97478	0.92811-1.0238	0.748	0.9911	0.93842-1.04674	0.661	0.99216	0.95788-1.02767	0.786	0.98759	0.90314-1.07994	0.641	0.98965	0.94770-1.03345	0.00837	0.3193	0.67	28.159	32	0.66147	27.1346	31	0.6654
ebi-a-GCST90001601	16	0.602	1.04476	0.88964-1.2269	0.919	1.00614	0.89374-1.13266	0.661	1.0224	0.92591-1.12895	0.726	1.03766	0.84703-1.27119	0.853	1.01236	0.89059-1.15079	-0.00612	0.73761	0.068	24.3642	15	0.05916	24.1626	14	0.04379
ebi-a-GCST90001411	14	0.088	1.21371	0.98944-1.4888	0.574	1.04285	0.90091-1.20716	0.665	1.02259	0.92424-1.13141	0.822	0.9744	0.78134-1.21517	0.758	1.02606	0.87420-1.20431	-0.03765	0.08289	0.491	12.5193	13	0.48559	8.94041	12	0.70801
ebi-a-GCST90001502	35	0.484	1.00723	0.98735-1.0275	0.565	1.00739	0.98245-1.03296	0.666	1.00367	0.98710-1.02053	0.289	0.97634	0.93470-1.01983	0.753	1.00325	0.98330-1.02361	-0.00607	0.5311	0.485	33.3792	34	0.49787	32.9785	33	0.4683
ebi-a-GCST90001619	30	0.182	0.97188	0.93300-1.0124	0.308	0.97794	0.93688-1.02080	0.668	0.99303	0.96180-1.02528	0.887	0.99539	0.93443-1.06032	0.421	0.98379	0.94589-1.02320	0.01456	0.10791	0.539	28.4725	29	0.49277	25.7142	28	0.58875
ebi-a-GCST90001870	10	0.647	1.01271	0.96141-1.0668	0.781	1.00664	0.96081-1.05465	0.67	1.0082	0.97105-1.04677	0.842	0.99008	0.90013-1.08901	0.79	1.00615	0.96306-1.05117	-0.00357	0.8137	0.957	3.36629	9	0.94799	3.30696	8	0.91364
ebi-a-GCST90002059	15	0.533	1.06314	0.88162-1.2820	0.55	0.96995	0.87752-1.07211	0.671	1.026	0.91142-1.15500	0.72	0.957	0.75617-1.21115	0.427	0.957	0.86133-1.06329	-0.01178	0.63226	0.002	39.589	14	0.0003	38.8709	13	0.00021
ebi-a-GCST90001475	18	0.352	1.07754	0.92509-1.2551	0.059	0.90847	0.82214-1.00385	0.672	0.98156	0.90056-1.06986	0.081	0.86715	0.74583-1.00821	0.161	0.89148	0.76438-1.03971	-0.03112	0.17114	0.003	34.2169	17	0.00787	30.3254	16	0.01639
ebi-a-GCST90001833	22	0.331	1.06798	0.93845-1.2154	0.605	1.02536	0.93264-1.12729	0.672	1.01545	0.94587-1.09015	0.6	0.9609	0.82960-1.11298	0.926	1.00465	0.91147-1.10735	-0.01368	0.37044	0.147	29.2174	21	0.10888	28.0404	20	0.10845
ebi-a-GCST90001590	19	0.851	0.98988	0.89136-1.0993	0.727	0.98664	0.91478-1.06414	0.673	0.9834	0.90994-1.06279	0.934	1.0082	0.83215-1.22149	0.741	0.98861	0.92468-1.05696	-0.00281	0.85212	0.016	37.434	18	0.0046	37.3553	17	0.00301
ebi-a-GCST90001834	22	0.758	1.00803	0.95866-1.0599	0.458	1.02055	0.96714-1.07692	0.673	1.0084	0.96998-1.04835	0.414	0.96049	0.87367-1.05593	0.445	1.0191	0.97164-1.06888	0.00025	0.98177	0.777	16.0211	21	0.76847	16.0205	20	0.71535
ebi-a-GCST90001570	25	0.452	1.03174	0.95242-1.1177	0.164	1.05353	0.97898-1.13375	0.675	1.01182	0.95782-1.06886	0.177	1.0877	0.96620-1.22448	0.272	1.06251	0.95587-1.18105	-0.00797	0.51369	0.125	31.7991	24	0.13205	31.2021	23	0.11791
ebi-a-GCST90001874	25	0.419	1.04595	0.93976-1.1642	0.673	1.01338	0.95270-1.07792	0.676	0.98904	0.93920-1.04153	0.966	0.99753	0.89202-1.11551	0.882	1.00803	0.90786-1.11924	-0.01957	0.25512	0.079	35.2038	24	0.06544	33.2355	23	0.07705
ebi-a-GCST90001899	22	0.919	0.99733	0.94801-1.0492	1	1	0.94009-1.06372	0.677	0.9913	0.95137-1.03291	0.365	0.9507	0.85417-1.05813	0.718	0.98969	0.93621-1.04622	-0.00518	0.6815	0.081	27.7344	21	0.14785	27.4959	20	0.12188
ebi-a-GCST90001396	14	0.699	1.04854	0.82912-1.3260	0.97	0.99763	0.88167-1.12885	0.68	1.02158	0.92291-1.13081	0.984	0.99826	0.84392-1.18082	0.916	1.00861	0.86343-1.17821	-0.00559	0.8118	0.272	16.3534	13	0.23057	16.273	12	0.17905
ebi-a-GCST90002054	10	0.429	0.90404	0.71287-1.1465	0.562	1.04113	0.90843-1.19322	0.682	1.02074	0.92525-1.12609	0.567	1.07355	0.84929-1.35703	0.48	0.92494	0.75140-1.13857	0.02969	0.3033	0.554	6.87934	9	0.64968	5.6692	8	0.68423
ebi-a-GCST90001662	13	0.903	1.0017	0.97529-1.0288	0.84	0.99727	0.97126-1.02398	0.683	0.99469	0.96965-1.02039	0.376	0.94021	0.82441-1.07228	0.629	0.99421	0.97163-1.01731	-0.01647	0.20531	0.501	14.6578	12	0.26069	12.5844	11	0.32136
ebi-a-GCST90002055	13	0.1	1.2308	0.98109-1.5441	0.478	1.06055	0.90143-1.24775	0.684	0.9711	0.84334-1.11821	0.421	1.09399	0.88555-1.35150	0.391	1.08898	0.90259-1.31386	-0.0537	0.03472	0.095	18.3987	12	0.10411	12.0471	11	0.36011
ebi-a-GCST90001493	26	0.715	1.00829	0.96500-1.0535	0.861	0.99594	0.95163-1.04231	0.684	0.99277	0.95872-1.02803	0.469	0.9694	0.89239-1.05306	0.806	0.99498	0.95627-1.03524	-0.01126	0.26435	0.894	17.1418	25	0.87659	15.8356	24	0.89392
ebi-a-GCST90001623	30	0.557	1.02407	0.94676-1.1077	0.432	1.03404	0.95127-1.12400	0.684	0.98918	0.93867-1.04241	0.484	1.06043	0.90174-1.24705	0.363	1.03373	0.96349-1.10910	-0.01096	0.25484	0.845	20.7932	29	0.86657	19.4417	28	0.88395
ebi-a-GCST90001924	18	0.389	1.03754	0.95621-1.1258	0.813	1.00889	0.93741-1.08582	0.685	0.98777	0.93074-1.04829	0.642	0.97361	0.87155-1.08762	0.684	1.01513	0.94538-1.09003	-0.02052	0.12035	0.161	22.9862	17	0.1497	19.6757	16	0.23519
ebi-a-GCST90001930	17	0.935	1.00412	0.91093-1.1068	0.818	0.98956	0.90504-1.08198	0.686	0.98702	0.92654-1.05146	0.765	0.97929	0.85553-1.12095	0.749	0.98663	0.90973-1.07004	-0.00529	0.65608	0.648	14.3134	16	0.57538	14.107	15	0.51743
ebi-a-GCST90001613	19	0.536	0.98256	0.93035-1.0377	0.583	0.98471	0.93201-1.04039	0.688	0.991	0.94827-1.03567	0.988	1.00093	0.88499-1.13206	0.651	0.98926	0.94476-1.03586	0.00578	0.59483	0.463	19.7275	18	0.34837	19.3924	17	0.30648
ebi-a-GCST90001473	16	0.916	1.00379	0.93681-1.0755	0.462	0.97201	0.90126-1.04832	0.692	0.9895	0.93918-1.04253	0.68	0.97131	0.84804-1.11250	0.705	0.98768	0.92742-1.05185	-0.0083	0.533	0.455	15.2068	15	0.43663	14.7755	14	0.39367
ebi-a-GCST90001487	24	0.463	0.96841	0.89018-1.0535	0.361	0.96881	0.90510-1.03701	0.692	0.98792	0.93021-1.04921	0.453	0.95999	0.86453-1.06599	0.38	0.96839	0.90265-1.03891	0.00898	0.50839	0.052	36.5458	23	0.03625	35.8101	22	0.03182
ebi-a-GCST90001740	22	0.282	0.91394	0.77929-1.0719	0.998	0.99987	0.90201-1.10836	0.694	1.0179	0.93174-1.11202	0.518	1.05834	0.89388-1.25306	0.916	0.99395	0.88903-1.11126	0.02842	0.13213	0.021	35.9605	21	0.02209	32.0153	20	0.04314
ebi-a-GCST90002076	23	0.402	1.0428	0.94740-1.1478	0.895	1.00556	0.92569-1.09232	0.694	1.01138	0.95583-1.07016	0.714	0.9761	0.85908-1.10905	0.911	1.00517	0.91917-1.09923	-0.00922	0.44803	0.755	16.5241	22	0.78905	15.9263	21	0.77378
ebi-a-GCST90001909	10	0.603	0.92184	0.68653-1.2378	0.29	1.10098	0.92144-1.31550	0.696	1.02961	0.88937-1.19196	0.492	1.11849	0.82316-1.51978	0.419	1.17722	0.80693-1.71744	0.0246	0.41921	0.121	13.3773	9	0.14626	12.2655	8	0.13975
ebi-a-GCST90001850	24	0.738	1.01705	0.92227-1.1216	0.916	1.00414	0.92949-1.08479	0.696	0.98801	0.92996-1.04968	0.825	1.01361	0.90035-1.14112	0.916	1.00415	0.93021-1.08398	-0.01106	0.46503	0.282	27.9439	23	0.21791	27.2589	22	0.20156
ebi-a-GCST90001712	15	0.575	1.01824	0.95734-1.0830	0.166	0.95746	0.90027-1.01828	0.699	0.99108	0.94709-1.03712	0.371	1.05972	0.93704-1.19847	0.066	0.94414	0.89239-0.99890	-0.02385	0.2361	0.185	18.2316	14	0.19644	16.2971	13	0.23346
ebi-a-GCST90002078	22	0.218	0.94491	0.86597-1.0310	0.806	0.99036	0.91675-1.06988	0.701	0.98852	0.93201-1.04845	0.358	0.94333	0.83529-1.06533	0.516	0.97694	0.91165-1.04692	0.02055	0.19147	0.113	30.167	21	0.08868	27.6408	20	0.11818
ebi-a-GCST90001961	20	0.755	0.98894	0.92308-1.0595	0.65	1.01302	0.95797-1.07122	0.702	1.00867	0.96503-1.05428	0.538	0.96884	0.87758-1.06958	0.77	1.00867	0.95278-1.06784	0.01122	0.47315	0.98	9.00615	19	0.97338	8.46925	18	0.9708
ebi-a-GCST90001640	5	0.712	0.86188	0.42103-1.7643	0.626	0.94359	0.74700-1.19192	0.703	0.96369	0.79693-1.16534	0.534	0.90064	0.66604-1.21787	0.614	0.92386	0.69537-1.22743	0.01837	0.77216	0.687	2.67093	4	0.61431	2.57057	3	0.46267
ebi-a-GCST90001423	12	0.999	1.00009	0.81257-1.2309	0.645	1.03911	0.88265-1.22331	0.703	1.02129	0.91645-1.13814	0.648	1.07015	0.80628-1.42036	0.758	1.05373	0.76114-1.45879	0.0049	0.81797	0.283	11.0713	11	0.43731	11.0098	10	0.35675
ebi-a-GCST90001653	26	0.408	1.03584	0.95435-1.1243	0.416	1.03448	0.95329-1.12258	0.706	0.9889	0.93322-1.04790	0.36	0.93262	0.80538-1.07997	0.73	1.01408	0.93743-1.09700	-0.01663	0.13897	0.237	29.9871	25	0.22477	27.3206	24	0.28973
ebi-a-GCST90001656	26	0.408	0.9654	0.88944-1.0478	0.424	0.96667	0.88951-1.05053	0.706	1.01123	0.95429-1.07156	0.437	1.07225	0.90187-1.27481	0.707	0.98612	0.91756-1.05979	0.01663	0.13897	0.218	29.9871	25	0.22477	27.3206	24	0.28973
ebi-a-GCST90002060	20	0.416	0.97452	0.91710-1.0355	0.962	1.00163	0.93747-1.07018	0.706	1.00936	0.96162-1.05948	0.964	1.00248	0.90112-1.11525	0.768	0.9903	0.92892-1.05572	0.01851	0.09895	0.327	21.4259	19	0.31375	18.3413	18	0.43339
ebi-a-GCST90002037	18	0.972	1.00151	0.92184-1.0881	0.398	0.96814	0.89806-1.04370	0.708	0.98947	0.93622-1.04575	0.092	0.86778	0.74257-1.01410	0.994	0.99967	0.91903-1.08738	-0.00486	0.70003	0.269	19.7988	17	0.28465	19.6102	16	0.23829
ebi-a-GCST90001730	21	0.981	0.99952	0.96147-1.0391	0.643	0.98988	0.94821-1.03339	0.71	1.00615	0.97420-1.03915	0.604	1.02535	0.93427-1.12531	0.912	0.99814	0.96625-1.03108	0.00679	0.54079	0.425	22.1092	20	0.33462	21.6668	19	0.30115
ebi-a-GCST90001605	15	0.676	0.98457	0.91683-1.0573	0.767	1.01011	0.94507-1.07961	0.712	1.01115	0.95337-1.07244	0.817	0.98308	0.85287-1.13317	0.787	1.00859	0.94914-1.07175	0.01721	0.23425	0.442	16.9033	14	0.26137	15.0963	13	0.30138
ebi-a-GCST90001919	22	0.293	1.04092	0.96787-1.1195	0.814	1.00808	0.94266-1.07804	0.712	1.00907	0.96176-1.05871	0.51	1.03611	0.93408-1.14930	0.728	1.01464	0.93595-1.09994	-0.01609	0.28042	0.426	21.7304	21	0.41519	20.4707	20	0.42885
ebi-a-GCST90001901	20	0.986	0.99968	0.96444-1.0362	0.936	0.99819	0.95516-1.04316	0.714	0.99411	0.96322-1.02599	0.724	0.98574	0.91127-1.06628	0.759	0.99499	0.96404-1.02693	-0.00692	0.5291	0.588	18.1904	19	0.50975	17.7786	18	0.47033
ebi-a-GCST90001406	27	0.728	1.01856	0.91947-1.1283	0.744	1.01512	0.92774-1.11073	0.718	1.0128	0.94520-1.08524	0.676	1.039	0.87030-1.24041	0.939	1.00342	0.91998-1.09442	-0.00237	0.88235	0.001	58.3041	26	0.00028	58.252	25	0.00018
ebi-a-GCST90002052	9	0.335	0.96443	0.90046-1.0329	0.535	0.98287	0.93069-1.03798	0.718	0.99222	0.95100-1.03522	0.652	0.98226	0.91139-1.05863	0.683	0.98772	0.93286-1.04581	0.01969	0.33633	0.814	4.24934	8	0.83396	3.18397	7	0.86748
ebi-a-GCST90001948	22	0.423	0.97313	0.91161-1.0388	0.492	0.9856	0.94566-1.02723	0.719	0.99259	0.95324-1.03357	0.723	0.9808	0.88231-1.09029	0.375	0.9808	0.94051-1.02282	0.01089	0.45506	0.196	29.0618	21	0.11253	28.2423	20	0.10379
ebi-a-GCST90001520	21	0.523	0.97627	0.90812-1.0495	0.623	0.98764	0.93983-1.03788	0.721	0.98996	0.93659-1.04638	0.779	0.98813	0.91009-1.07286	0.708	0.99172	0.95011-1.03515	0.01077	0.555	0.003	47.993	20	0.00043	47.0979	19	0.00035
ebi-a-GCST90001857	22	0.669	0.98434	0.91660-1.0571	0.817	0.99255	0.93146-1.05764	0.723	0.99182	0.94775-1.03794	0.657	1.02313	0.92633-1.13004	0.817	0.99215	0.92879-1.05984	0.00319	0.78984	0.763	16.9488	21	0.71421	16.8758	20	0.66102
ebi-a-GCST90001751	24	0.708	1.01776	0.92919-1.1148	0.809	1.00901	0.93836-1.08498	0.723	1.01131	0.95026-1.07628	0.732	0.97806	0.86286-1.10865	0.964	0.99844	0.93468-1.06656	-0.0026	0.84998	0.073	35.5762	23	0.04555	35.517	22	0.03418
ebi-a-GCST90001920	17	0.737	0.98638	0.91187-1.0670	0.827	0.99178	0.92118-1.06780	0.725	0.98919	0.93117-1.05083	0.631	1.0346	0.90297-1.18542	0.664	0.98514	0.92191-1.05271	0.00149	0.90861	0.278	20.426	16	0.20165	20.4074	15	0.15685
ebi-a-GCST90001934	18	0.573	1.02256	0.94778-1.1032	0.432	1.02251	0.96729-1.08088	0.725	1.01092	0.95148-1.07407	0.513	0.95458	0.83290-1.09404	0.471	1.01933	0.96872-1.07258	-0.00724	0.61614	0.1	30.3224	17	0.02411	29.835	16	0.01888
ebi-a-GCST90001976	17	0.3	0.9155	0.77930-1.0755	0.655	0.9739	0.86719-1.09374	0.727	0.98278	0.89146-1.08345	0.417	0.90914	0.72677-1.13728	0.574	0.96972	0.87295-1.07721	0.02223	0.29685	0.169	23.6384	16	0.09771	21.9305	15	0.10964
ebi-a-GCST90001521	23	0.783	0.99013	0.92352-1.0615	0.551	1.0217	0.95205-1.09644	0.727	1.00826	0.96276-1.05591	0.531	1.0455	0.91152-1.19917	0.591	1.02463	0.93893-1.11814	0.00735	0.5025	0.63	18.0421	22	0.70349	17.5766	21	0.67562
ebi-a-GCST90002102	22	0.115	0.96792	0.93110-1.0062	0.73	0.99275	0.95262-1.03457	0.728	0.9947	0.96539-1.02490	0.348	1.02846	0.97122-1.08907	0.455	0.98633	0.95197-1.02194	0.02982	0.06015	0.274	24.9259	21	0.25039	20.7979	20	0.40911
ebi-a-GCST90001942	11	0.316	1.02951	0.97569-1.0863	0.363	1.02375	0.97327-1.07685	0.73	1.0087	0.96028-1.05956	0.652	0.96263	0.81961-1.13060	0.227	1.03207	0.98359-1.08293	-0.0215	0.17103	0.294	14.3113	10	0.15926	11.4869	9	0.2438
ebi-a-GCST90001686	21	0.639	0.95873	0.80634-1.1399	0.429	1.04936	0.93120-1.18250	0.731	1.01464	0.93397-1.10227	0.588	1.05056	0.88131-1.25232	0.575	1.03804	0.91293-1.18029	0.01122	0.47376	0.583	19.079	20	0.51669	18.5448	19	0.48636
ebi-a-GCST90001489	26	0.891	1.00252	0.96751-1.0388	0.929	0.99858	0.96782-1.03032	0.731	0.99506	0.96736-1.02356	0.2	0.9404	0.85819-1.03049	0.809	0.99668	0.97044-1.02363	-0.00651	0.49652	0.188	33.6127	25	0.11645	32.958	24	0.10496
ebi-a-GCST90001510	17	0.27	1.0239	0.98335-1.0661	0.537	0.98662	0.94528-1.02976	0.731	1.00522	0.97579-1.03555	0.606	1.0173	0.95427-1.08449	0.953	0.99887	0.96301-1.03607	-0.02458	0.20742	0.669	12.9061	16	0.67961	11.1701	15	0.74044
ebi-a-GCST90001530	17	0.892	0.98982	0.85563-1.1451	0.543	0.97792	0.91008-1.05082	0.734	0.98735	0.91749-1.06253	0.432	1.05315	0.92842-1.19463	0.954	0.99787	0.92935-1.07145	-0.00092	0.96914	0.002	41.3662	16	0.00049	41.362	15	0.00028
ebi-a-GCST90001588	26	0.195	0.92647	0.82813-1.0365	0.438	0.9656	0.88378-1.05499	0.734	0.98913	0.92862-1.05359	0.953	1.00443	0.86796-1.16236	0.692	0.97815	0.87805-1.08967	0.01551	0.18275	0.381	27.0481	25	0.35349	25.0809	24	0.40138
ebi-a-GCST90001441	16	0.85	1.02239	0.81560-1.2816	0.753	0.97645	0.84193-1.13246	0.737	0.98151	0.88014-1.09455	0.635	0.94646	0.75782-1.18206	0.627	0.96294	0.82940-1.11799	-0.00938	0.68965	0.298	17.9943	15	0.26296	17.7832	14	0.21684
ebi-a-GCST90002049	16	0.674	1.02154	0.92679-1.1260	0.805	1.01037	0.93078-1.09676	0.738	1.00938	0.95568-1.06610	0.367	0.9424	0.83160-1.06796	0.876	1.00662	0.92767-1.09229	-0.00559	0.77502	0.625	13.2298	15	0.58455	13.1449	14	0.51515
ebi-a-GCST90002038	19	0.954	1.00174	0.94455-1.0624	0.923	0.99685	0.93498-1.06280	0.738	0.99273	0.95121-1.03607	0.816	0.9858	0.87545-1.11006	0.977	0.99921	0.94686-1.05446	-0.00491	0.65813	0.377	19.843	18	0.34173	19.609	17	0.29471
ebi-a-GCST90002017	23	0.516	0.95901	0.84699-1.0858	0.971	1.00158	0.92068-1.08960	0.739	0.98987	0.93237-1.05091	0.318	0.93122	0.81217-1.06771	0.57	0.9733	0.88784-1.06699	0.01022	0.57458	0.789	16.8343	22	0.77244	16.5091	21	0.7404
ebi-a-GCST90001935	14	0.658	1.05669	0.83302-1.3404	0.598	1.04013	0.89866-1.20386	0.74	1.02042	0.90545-1.15000	0.237	1.21529	0.89284-1.65420	0.193	1.18874	0.92874-1.52153	-0.00884	0.74185	0.076	21.317	13	0.06689	21.117	12	0.04869
ebi-a-GCST90001490	7	0.969	0.99601	0.82155-1.2075	0.653	0.96971	0.84803-1.10885	0.742	0.98072	0.87351-1.10108	0.901	0.98844	0.82872-1.17896	0.797	0.98188	0.85923-1.12202	-0.00635	0.84296	0.428	7.0775	6	0.31374	7.01641	5	0.21942
ebi-a-GCST90001719	21	0.432	0.97144	0.90508-1.0427	0.131	0.95917	0.90860-1.01255	0.742	1.00943	0.95458-1.06744	0.751	0.97991	0.86611-1.10867	0.131	0.9577	0.90756-1.01061	0.02618	0.11922	0.013	42.4383	20	0.00242	37.2226	19	0.00744
ebi-a-GCST90001889	22	0.608	1.0165	0.95590-1.0809	0.401	1.02966	0.96179-1.10231	0.742	1.00801	0.96124-1.05705	0.422	0.94644	0.82955-1.07980	0.152	1.05602	0.98279-1.13472	-0.00617	0.6685	0.081	29.131	21	0.11089	28.8584	20	0.09058
ebi-a-GCST90002095	21	0.205	1.08054	0.96255-1.2130	0.919	0.99615	0.92485-1.07295	0.742	1.00946	0.95435-1.06775	0.995	1.0004	0.88095-1.13605	0.739	1.01638	0.92509-1.11667	-0.0247	0.20501	0.193	24.8009	20	0.20915	22.7394	19	0.24901
ebi-a-GCST90001458	20	0.145	1.04392	0.98772-1.1033	0.513	1.02232	0.95682-1.09231	0.743	1.00775	0.96235-1.05530	0.652	0.97478	0.87395-1.08725	0.419	1.02565	0.96584-1.08915	-0.02178	0.06338	0.251	22.4179	19	0.26395	18.4134	18	0.42875
ebi-a-GCST90001501	20	0.665	0.99414	0.96842-1.0205	0.885	0.99784	0.96901-1.02752	0.743	1.00346	0.98297-1.02437	0.148	1.03373	0.99016-1.07923	0.951	1.00074	0.97766-1.02437	0.01531	0.27265	0.642	17.0561	19	0.58607	15.7755	18	0.60821
ebi-a-GCST90001753	25	0.982	1.00109	0.91112-1.0999	0.72	1.01517	0.93505-1.10216	0.744	1.01094	0.94699-1.07920	0.663	0.96444	0.82116-1.13272	0.72	1.0151	0.93606-1.10080	0.00355	0.77581	0.067	35.7275	24	0.05832	35.599	23	0.04531
ebi-a-GCST90001943	19	0.434	1.02065	0.97085-1.0730	0.908	0.99656	0.93971-1.05684	0.744	1.0069	0.96610-1.04943	0.957	1.00288	0.90380-1.11282	0.585	1.01276	0.96848-1.05907	-0.01395	0.35527	0.22	23.2483	18	0.18123	22.0756	17	0.18183
ebi-a-GCST90001925	17	0.378	0.89996	0.71700-1.1296	0.371	0.94105	0.82385-1.07492	0.745	0.98227	0.88177-1.09421	0.252	0.89486	0.74510-1.07472	0.525	0.94775	0.80600-1.11442	0.01957	0.40352	0.105	23.7578	16	0.09493	22.6424	15	0.09203
ebi-a-GCST90001825	22	0.037	0.92254	0.85969-0.9900	0.085	0.95267	0.90159-1.00663	0.748	0.99128	0.93980-1.04559	0.36	1.0528	0.94529-1.17254	0.134	0.96036	0.91272-1.01049	0.03492	0.01461	0.028	36.8163	21	0.01767	27.1244	20	0.1318
ebi-a-GCST90001453	16	0.394	1.11169	0.87787-1.4078	0.057	1.13053	0.99610-1.28309	0.749	1.01979	0.90455-1.14970	0.281	1.12005	0.91841-1.36597	0.209	1.1002	0.95414-1.26862	-0.02282	0.41809	0.037	27.7198	15	0.02339	26.4067	14	0.02297
ebi-a-GCST90001700	169	0.591	0.99973	0.99875-1.0007	0.689	0.9998	0.99883-1.00078	0.751	0.99989	0.99923-1.00056	0.824	1.00017	0.99867-1.00168	0.597	0.99975	0.99881-1.00068	0.00405	0.66072	0.131	188.683	168	0.13112	188.464	167	0.12227
ebi-a-GCST90001480	23	0.373	0.95839	0.87463-1.0502	0.718	0.98541	0.90977-1.06733	0.755	1.00896	0.95404-1.06704	0.233	1.08922	0.95003-1.24881	0.932	0.99637	0.91718-1.08240	0.01972	0.17814	0.796	16.3721	22	0.797	14.4312	21	0.85038
ebi-a-GCST90001578	23	0.404	1.08975	0.89429-1.3279	0.914	0.99352	0.88341-1.11736	0.756	0.98406	0.88940-1.08880	0.587	0.93448	0.73444-1.18900	0.167	1.12317	0.95781-1.31708	-0.0207	0.25361	0.013	38.7633	22	0.01502	36.3766	21	0.01983
ebi-a-GCST90001688	75	0.699	1.00167	0.99328-1.0101	0.441	0.99586	0.98539-1.00644	0.757	0.99896	0.99238-1.00558	0.24	0.99003	0.97377-1.00657	0.507	0.99604	0.98448-1.00773	-0.00949	0.31083	0.49	73.7073	74	0.48773	72.6657	73	0.48902
ebi-a-GCST90001824	23	0.477	0.96403	0.87308-1.0645	0.275	0.96454	0.90401-1.02912	0.76	0.99135	0.93756-1.04822	0.954	0.99621	0.87627-1.13257	0.395	0.97157	0.91024-1.03704	0.00938	0.50852	0.209	27.5659	22	0.19052	26.9845	21	0.17137
ebi-a-GCST90001564	14	0.785	1.01447	0.91726-1.1220	0.966	1.00208	0.91140-1.10178	0.76	1.0111	0.94195-1.08532	0.475	0.94476	0.81213-1.09905	0.765	1.01375	0.92848-1.10684	-0.00152	0.92576	0.344	15.3107	13	0.28836	15.2992	12	0.22548
ebi-a-GCST90001537	24	0.542	0.97303	0.89241-1.0609	0.493	0.97411	0.90371-1.05000	0.761	1.00998	0.94732-1.07680	0.569	1.04463	0.90087-1.21133	0.552	0.97987	0.91732-1.04669	0.01806	0.22803	0.098	33.6467	23	0.07044	31.4486	22	0.0873
ebi-a-GCST90001596	23	0.236	0.96398	0.90875-1.0226	0.307	0.9678	0.90886-1.03056	0.761	0.99319	0.95037-1.03795	0.365	1.05194	0.94497-1.17101	0.391	0.97355	0.91684-1.03376	0.01864	0.15042	0.581	19.8175	22	0.59445	17.5897	21	0.6748
ebi-a-GCST90001620	24	0.206	0.96138	0.90612-1.0200	0.776	0.99178	0.93707-1.04968	0.762	0.9937	0.95394-1.03511	0.511	1.03161	0.94162-1.13021	0.921	0.99732	0.94655-1.05081	0.01748	0.14487	0.562	21.6762	23	0.53987	19.3913	22	0.62106
ebi-a-GCST90001452	19	0.34	1.03437	0.96690-1.1066	0.473	1.02363	0.96041-1.09101	0.763	1.0076	0.95931-1.05832	0.048	0.89632	0.81001-0.99182	0.485	1.02058	0.96501-1.07935	-0.01445	0.28179	0.631	16.3404	18	0.5688	15.1048	17	0.58793
ebi-a-GCST90001476	6	0.334	1.58877	0.69495-3.6322	0.712	1.02791	0.88825-1.18953	0.765	1.02668	0.86374-1.22035	0.3	0.85738	0.66041-1.11310	0.39	1.07899	0.92094-1.26416	-0.09459	0.3498	0.08	12.0633	5	0.03393	9.42643	4	0.05128
ebi-a-GCST90001883	24	0.829	1.0113	0.91434-1.1185	0.753	0.98654	0.90666-1.07346	0.767	0.99078	0.93191-1.05338	0.932	0.99436	0.87435-1.13085	0.889	0.99436	0.91952-1.07529	-0.00774	0.61726	0.167	30.4678	23	0.13644	30.116	22	0.11567
ebi-a-GCST90002050	15	0.49	1.03984	0.93368-1.1581	0.712	1.01497	0.93803-1.09823	0.769	1.00852	0.95307-1.06719	0.945	1.00442	0.88780-1.13636	0.893	1.00691	0.91206-1.11163	-0.01379	0.52444	0.889	7.60995	14	0.90864	7.18209	13	0.89253
ebi-a-GCST90002084	20	0.113	1.03153	0.99449-1.0700	0.964	1.00105	0.95586-1.04838	0.774	1.00461	0.97357-1.03664	0.954	1.00319	0.90115-1.11678	0.327	1.01768	0.98355-1.05299	-0.02452	0.01289	0.479	18.8976	19	0.46343	11.2797	18	0.88211
ebi-a-GCST90001681	18	0.393	1.0606	0.92996-1.2096	0.324	1.05441	0.94907-1.17143	0.774	1.0107	0.93992-1.08681	0.531	1.07661	0.85887-1.34954	0.17	1.11333	0.96130-1.28941	-0.01307	0.40142	0.568	14.0171	17	0.66589	13.274	16	0.65263
ebi-a-GCST90001448	14	0.484	0.95506	0.84301-1.0820	0.726	1.01791	0.92161-1.12428	0.777	1.01152	0.93439-1.09502	0.649	0.96633	0.83660-1.11617	0.889	1.00641	0.92176-1.09884	0.02563	0.26918	0.277	16.9593	13	0.20117	15.2532	12	0.22788
ebi-a-GCST90001603	15	0.967	1.00472	0.80542-1.2533	0.35	0.94021	0.82610-1.07007	0.777	1.01681	0.90582-1.14140	0.914	0.9856	0.76085-1.27674	0.705	0.9691	0.82651-1.13629	0.003	0.90149	0.022	27.3112	14	0.01754	27.2778	13	0.0114
ebi-a-GCST90001524	18	0.743	1.02197	0.89954-1.1611	0.987	0.99928	0.91312-1.09356	0.778	1.00898	0.94833-1.07350	0.657	1.0379	0.88331-1.21955	0.702	0.97394	0.85271-1.11240	-0.00385	0.82332	0.376	18.138	17	0.38018	18.0798	16	0.31924
ebi-a-GCST90002087	30	0.341	0.96924	0.90992-1.0324	0.606	0.98538	0.93168-1.04217	0.778	1.00721	0.95815-1.05878	0.529	1.03891	0.92385-1.16828	0.497	0.98279	0.93539-1.03259	0.02013	0.07705	0.049	45.1163	29	0.02867	40.27	28	0.06255
ebi-a-GCST90002004	24	0.991	0.99981	0.96792-1.0327	0.571	1.00971	0.97653-1.04403	0.778	1.00395	0.97673-1.03194	0.498	1.02284	0.95919-1.09072	0.619	1.00669	0.98088-1.03318	0.00475	0.62572	0.134	32.4723	23	0.09071	32.1151	22	0.07546
ebi-a-GCST90001446	10	0.471	0.90467	0.69781-1.1728	0.805	0.978	0.82000-1.16645	0.779	0.97976	0.84949-1.13001	0.993	0.99901	0.79982-1.24780	0.711	0.96098	0.78365-1.17845	0.02276	0.49168	0.877	4.3598	9	0.88618	3.84056	8	0.87121
ebi-a-GCST90001721	19	0.774	0.98385	0.88176-1.0978	0.763	0.9853	0.89503-1.08469	0.78	1.01126	0.93496-1.09378	0.764	1.02885	0.85680-1.23544	0.531	0.97145	0.88892-1.06164	0.00946	0.48448	0.129	24.5812	18	0.13689	23.8641	17	0.12317
ebi-a-GCST90001777	20	0.927	0.99871	0.97172-1.0264	0.989	0.99984	0.97725-1.02295	0.781	0.99655	0.97259-1.02111	0.332	0.95064	0.86044-1.05030	0.93	0.99904	0.97789-1.02063	-0.0038	0.71498	0.362	26.9449	19	0.10594	26.7404	18	0.08399
ebi-a-GCST90001947	24	0.466	0.98018	0.92974-1.0334	0.441	0.98639	0.95260-1.02139	0.782	0.99519	0.96173-1.02982	0.976	0.99896	0.93478-1.06754	0.468	0.98755	0.95525-1.02094	0.01046	0.46424	0.068	36.2358	23	0.03902	35.3445	22	0.03565
ebi-a-GCST90002112	12	0.876	1.0056	0.93941-1.0764	0.638	1.01314	0.95952-1.06976	0.786	1.00616	0.96255-1.05175	0.262	1.06185	0.96138-1.17282	0.627	1.01481	0.95804-1.07494	0.00032	0.98334	0.7	8.07284	11	0.70676	8.07238	10	0.62177
ebi-a-GCST90002023	13	0.49	1.1285	0.80960-1.5730	0.833	1.01336	0.89556-1.14665	0.787	1.01537	0.90880-1.13445	0.975	1.00356	0.80714-1.24779	0.763	1.02319	0.88446-1.18369	-0.02306	0.52072	0.053	21.409	12	0.0447	20.5854	11	0.03793
ebi-a-GCST90001586	22	0.698	1.00834	0.96749-1.0509	0.587	1.00997	0.97448-1.04674	0.789	0.99489	0.95826-1.03292	0.933	1.00534	0.89014-1.13544	0.503	1.01149	0.97876-1.04531	-0.01735	0.18191	0.247	33.4744	21	0.04121	30.5524	20	0.06138
ebi-a-GCST90002035	25	0.685	0.98496	0.91626-1.0588	0.775	1.01043	0.94107-1.08489	0.79	1.00667	0.95854-1.05721	0.635	1.02456	0.92796-1.13122	0.913	1.0036	0.94125-1.07008	0.00842	0.42996	0.804	18.8452	24	0.76019	18.1998	23	0.74657
ebi-a-GCST90002018	14	0.794	1.01068	0.93469-1.0928	0.921	0.99604	0.92054-1.07772	0.791	0.99178	0.93319-1.05406	0.959	0.99636	0.86880-1.14264	0.924	0.99636	0.92553-1.07261	-0.0106	0.4648	0.996	3.58625	13	0.99485	3.01621	12	0.99543
ebi-a-GCST90002063	23	0.847	1.0071	0.93804-1.0812	0.69	1.0146	0.94478-1.08957	0.792	1.00665	0.95815-1.05762	0.476	1.03625	0.94113-1.14099	0.782	1.01092	0.93700-1.09067	-0.0002	0.98653	0.929	13.5151	22	0.91779	13.5148	21	0.88952
ebi-a-GCST90002118	12	0.869	1.02245	0.79073-1.3221	0.644	0.96751	0.84091-1.11318	0.793	1.01561	0.90466-1.14016	0.893	0.98496	0.79370-1.22230	0.772	0.97701	0.83778-1.13938	-0.00141	0.9548	0.276	13.8352	11	0.24225	13.8305	10	0.18086
ebi-a-GCST90002056	21	0.995	0.99963	0.89288-1.1191	0.868	0.99241	0.90735-1.08545	0.793	1.00866	0.94566-1.07586	0.472	1.05654	0.91211-1.22384	0.682	1.02114	0.92510-1.12715	0.00272	0.84928	0.279	23.0052	20	0.28854	22.9603	19	0.23909
ebi-a-GCST90001731	22	0.865	0.98333	0.81230-1.1904	0.976	0.99823	0.88989-1.11977	0.795	0.98652	0.89054-1.09283	0.507	0.92617	0.74118-1.15732	0.863	0.98626	0.84456-1.15174	0.00075	0.96875	0.011	40.9047	21	0.00576	40.9015	20	0.00384
ebi-a-GCST90001881	15	0.935	0.99391	0.86009-1.1485	0.796	1.01128	0.92895-1.10091	0.798	0.99197	0.93245-1.05528	0.527	1.05151	0.90353-1.22372	0.505	1.04753	0.91713-1.19648	-0.00058	0.97704	0.588	12.5198	14	0.56463	12.5189	13	0.48562
ebi-a-GCST90001807	16	0.352	1.05226	0.94862-1.1672	0.591	1.02809	0.92936-1.13732	0.799	1.01059	0.93202-1.09578	0.839	0.98151	0.82223-1.17165	0.521	1.03223	0.93909-1.13462	-0.0169	0.25143	0.281	19.183	15	0.20556	17.4038	14	0.2353
ebi-a-GCST90001844	20	0.961	1.00198	0.92661-1.0835	0.8	0.991	0.92390-1.06296	0.799	1.00673	0.95615-1.05998	0.744	0.98512	0.90147-1.07653	0.856	0.99364	0.92832-1.06355	0.00182	0.8739	0.498	19.6366	19	0.41673	19.6084	18	0.35529
ebi-a-GCST90001817	13	0.62	1.04385	0.88518-1.2309	0.941	1.00438	0.89388-1.12855	0.802	1.01263	0.91780-1.11726	0.905	1.01041	0.85540-1.19350	0.857	1.01041	0.90507-1.12801	-0.00855	0.65545	0.148	18.3401	12	0.10575	17.9961	11	0.08167
ebi-a-GCST90002065	14	0.861	0.99132	0.90104-1.0907	0.957	1.00224	0.92364-1.08754	0.802	1.00853	0.94361-1.07792	0.412	1.05976	0.92668-1.21196	0.918	0.99552	0.91572-1.08228	0.00945	0.62126	0.218	17.257	13	0.18782	16.8949	12	0.15359
ebi-a-GCST90001702	16	0.603	0.98094	0.91382-1.0530	0.373	0.97291	0.91582-1.03356	0.806	1.00674	0.95407-1.06232	0.461	1.05633	0.91646-1.21755	0.082	0.9447	0.88990-1.00288	0.02188	0.29342	0.067	27.5925	15	0.02426	25.4281	14	0.03057
ebi-a-GCST90001444	20	0.96	1.00252	0.90876-1.1060	0.684	1.01933	0.92942-1.11793	0.807	1.00819	0.94420-1.07651	0.486	1.07617	0.87892-1.31768	0.582	1.02665	0.93628-1.12574	0.00198	0.8789	0.378	20.2869	19	0.3775	20.26	18	0.31837
ebi-a-GCST90001880	19	0.53	1.01879	0.96247-1.0784	0.269	1.0223	0.98307-1.06310	0.811	1.00468	0.96702-1.04380	0.395	0.95959	0.87448-1.05298	0.351	1.01747	0.98205-1.05417	-0.00962	0.51936	0.093	31.5455	18	0.02487	30.762	17	0.02134
ebi-a-GCST90001774	17	0.674	0.96634	0.82638-1.1300	0.542	1.03802	0.92061-1.17041	0.813	1.01012	0.92908-1.09822	0.781	0.97164	0.79604-1.18597	0.493	1.05873	0.90265-1.24180	0.01502	0.52134	0.71	12.3681	16	0.71828	11.9368	15	0.6838
ebi-a-GCST90001885	21	0.586	1.01272	0.96838-1.0591	0.958	1.00125	0.95583-1.04884	0.814	0.99571	0.96076-1.03195	0.326	0.95407	0.87064-1.04549	0.794	0.99426	0.95279-1.03752	-0.01143	0.23332	0.626	18.7544	20	0.53783	17.2389	19	0.57368
ebi-a-GCST90001552	27	0.95	1.00102	0.97024-1.0328	0.832	1.00382	0.96910-1.03978	0.814	0.99675	0.97010-1.02413	0.442	1.02503	0.96329-1.09074	0.55	1.00873	0.98076-1.03750	-0.00512	0.57837	0.348	29.1095	26	0.30613	28.7449	25	0.27472
ebi-a-GCST90001685	14	0.832	1.05519	0.64909-1.7154	0.531	1.04974	0.90187-1.22184	0.815	1.01535	0.89368-1.15358	0.566	1.06477	0.86404-1.31213	0.548	1.06477	0.87248-1.29944	-0.00676	0.87448	0.098	19.9446	13	0.0966	19.9014	12	0.06897
ebi-a-GCST90001859	21	0.82	0.99279	0.93345-1.0559	0.862	0.99488	0.93901-1.05407	0.817	0.99474	0.95140-1.04006	0.519	1.03204	0.93938-1.13384	0.766	0.99184	0.94033-1.04617	0.00091	0.92878	0.664	17.9445	20	0.59106	17.9363	19	0.5267
ebi-a-GCST90001720	22	0.849	1.00846	0.92584-1.0984	0.078	0.94984	0.89704-1.00575	0.818	1.0073	0.94690-1.07154	0.966	0.99722	0.87939-1.13084	0.086	0.94975	0.89793-1.00456	-0.00069	0.96901	0.004	48.239	21	0.00064	48.2353	20	0.00039
ebi-a-GCST90001994	12	0.172	1.03651	0.98821-1.0872	0.654	1.01193	0.96073-1.06586	0.818	1.00457	0.96629-1.04437	0.512	1.02901	0.94733-1.11773	0.471	1.0183	0.97100-1.06792	-0.03332	0.0512	0.556	10.4074	11	0.49416	5.50486	10	0.85501
ebi-a-GCST90001472	17	0.401	1.03005	0.96320-1.1015	0.486	0.97459	0.90657-1.04771	0.819	0.99414	0.94544-1.04535	0.798	0.98312	0.86466-1.11780	0.936	1.0026	0.94188-1.06724	-0.02226	0.1388	0.56	14.4575	16	0.56467	12.0131	15	0.67803
ebi-a-GCST90001767	18	0.637	0.98392	0.92106-1.0511	0.593	0.98405	0.92768-1.04383	0.82	0.99527	0.95548-1.03672	0.397	0.96123	0.87922-1.05089	0.513	0.98341	0.93627-1.03292	0.00682	0.67062	0.776	12.8343	17	0.74721	12.6466	16	0.6984
ebi-a-GCST90001965	18	0.763	0.98836	0.91713-1.0651	0.966	0.99892	0.95013-1.05022	0.822	1.00719	0.94621-1.07211	0.457	0.93287	0.78011-1.11555	0.992	0.99976	0.95265-1.04919	0.01433	0.37634	0.098	36.4192	17	0.00403	34.6272	16	0.00447
ebi-a-GCST90001416	20	0.804	1.00461	0.96925-1.0413	0.448	1.01457	0.97739-1.05317	0.823	0.99663	0.96757-1.02656	0.752	0.9877	0.91577-1.06528	0.78	1.00432	0.97475-1.03479	-0.00968	0.43942	0.413	20.9495	19	0.3396	20.2463	18	0.31913
ebi-a-GCST90002034	21	0.847	1.0037	0.96736-1.0414	0.67	0.98993	0.94483-1.03718	0.826	1.00337	0.97364-1.03401	0.686	0.98389	0.91047-1.06324	0.891	1.0029	0.96265-1.04483	-0.00036	0.97532	0.268	22.508	20	0.3136	22.5068	19	0.25976
ebi-a-GCST90001557	15	0.518	1.04465	0.91846-1.1882	0.936	0.99558	0.89360-1.10919	0.827	1.0084	0.93565-1.08681	0.949	1.0056	0.84920-1.19081	0.783	1.01515	0.91383-1.12770	-0.01271	0.51931	0.488	13.5524	14	0.48356	13.11	13	0.43935
ebi-a-GCST90001830	11	0.889	0.97869	0.72878-1.3143	0.7	0.96744	0.81774-1.14454	0.831	0.98503	0.85763-1.13134	0.79	1.0349	0.80922-1.32350	0.355	0.92049	0.77869-1.08812	0.00181	0.96168	0.107	15.0567	10	0.13001	15.0526	9	0.0895
ebi-a-GCST90001765	22	0.355	0.98089	0.94252-1.0208	0.744	0.99278	0.95057-1.03686	0.832	0.99633	0.96313-1.03067	0.949	0.99755	0.92607-1.07455	0.594	0.98948	0.95232-1.02809	0.01324	0.18249	0.301	24.299	21	0.2788	22.1834	20	0.33065
ebi-a-GCST90001638	26	0.164	0.90538	0.79044-1.0370	0.921	1.00529	0.90623-1.11517	0.832	0.99208	0.92171-1.06781	0.55	0.95177	0.81119-1.11670	0.827	1.01475	0.89104-1.15563	0.0251	0.13337	0.289	28.2794	25	0.29515	25.6953	24	0.3688
ebi-a-GCST90002081	24	0.016	0.81526	0.69943-0.9503	0.277	0.94012	0.84100-1.05093	0.832	0.99134	0.91455-1.07457	0.894	1.01252	0.84481-1.21352	0.438	0.9512	0.84007-1.07702	0.04223	0.00853	0.333	25.4318	23	0.32841	17.0893	22	0.75841
ebi-a-GCST90001415	17	0.801	0.98897	0.90870-1.0763	0.373	1.0313	0.96364-1.10371	0.834	0.99357	0.93556-1.05519	0.17	0.90071	0.78088-1.03892	0.649	1.01517	0.95256-1.08190	0.00274	0.87635	0.107	25.6385	16	0.05933	25.5957	15	0.04249
ebi-a-GCST90001495	23	0.997	0.99988	0.93373-1.0707	0.979	1.00057	0.95812-1.04490	0.834	1.0044	0.96405-1.04644	0.174	1.08148	0.96941-1.20650	0.883	1.00331	0.96069-1.04781	0.00244	0.87156	0.278	27.4042	22	0.19627	27.3693	21	0.15896
ebi-a-GCST90001509	20	0.846	0.99597	0.95682-1.0367	0.976	1.00069	0.95618-1.04727	0.837	1.00332	0.97215-1.03550	0.346	1.03576	0.96444-1.11236	0.982	0.99952	0.95861-1.04218	0.00793	0.56731	0.808	13.7334	19	0.799	13.3939	18	0.76766
ebi-a-GCST90001609	14	0.696	1.0284	0.89649-1.1797	0.119	1.09813	0.97609-1.23544	0.838	1.00925	0.92396-1.10241	0.971	0.99495	0.75781-1.30629	0.112	1.10517	0.98514-1.23981	-0.00635	0.72524	0.172	17.9518	13	0.15936	17.7601	12	0.12317
ebi-a-GCST90002061	24	0.972	1.00215	0.89122-1.1269	0.648	0.98104	0.90365-1.06505	0.838	0.99342	0.93240-1.05844	0.716	1.02669	0.89222-1.18143	0.736	0.98551	0.90633-1.07161	-0.00283	0.8624	0.141	31.1758	23	0.11853	31.1323	22	0.09344
ebi-a-GCST90001854	22	0.785	1.01149	0.93277-1.0968	0.85	0.99368	0.93062-1.06101	0.839	0.99515	0.94951-1.04299	0.571	1.02857	0.93458-1.13201	0.839	0.99308	0.92944-1.06107	-0.0064	0.63134	0.48	20.901	21	0.46501	20.6557	20	0.41764
ebi-a-GCST90001946	20	0.559	0.98049	0.91893-1.0462	0.52	0.98669	0.94722-1.02781	0.84	1.00432	0.96316-1.04724	0.424	1.04813	0.93631-1.17330	0.672	0.99095	0.95081-1.03280	0.01498	0.35373	0.077	32.9084	19	0.02463	31.331	18	0.02635
ebi-a-GCST90002113	16	0.586	0.94436	0.77215-1.1550	0.967	0.99743	0.88353-1.12603	0.842	0.99111	0.90800-1.08182	0.584	1.05051	0.88408-1.24826	0.929	1.00737	0.85923-1.18105	0.0104	0.60958	0.81	9.95146	15	0.82278	9.67859	14	0.78528
ebi-a-GCST90001789	16	0.702	1.02241	0.91466-1.1429	0.289	0.945	0.85111-1.04924	0.842	0.99269	0.92369-1.06683	0.839	0.98151	0.82269-1.17099	0.335	0.94751	0.85223-1.05345	-0.01014	0.50145	0.33	16.972	15	0.32054	16.4137	14	0.28877
ebi-a-GCST90001783	13	0.345	0.89019	0.70670-1.1213	0.215	0.92602	0.82008-1.04564	0.844	0.99024	0.89810-1.09184	0.3	1.16528	0.88345-1.53703	0.195	0.89512	0.76414-1.04854	0.02279	0.3396	0.202	15.6707	12	0.20679	14.369	11	0.21325
ebi-a-GCST90001528	20	0.394	1.01913	0.97666-1.0635	0.801	1.00472	0.96858-1.04222	0.846	0.99697	0.96688-1.02800	0.914	1.00297	0.95123-1.05752	0.854	1.00297	0.97220-1.03472	-0.01807	0.17273	0.166	26.011	19	0.12988	23.3911	18	0.176
ebi-a-GCST90001829	18	0.434	0.96918	0.89776-1.0463	0.113	0.95772	0.90790-1.01027	0.847	1.00577	0.94878-1.06619	0.857	0.98825	0.87087-1.12146	0.104	0.95744	0.91102-1.00623	0.02777	0.17692	0.03	37.6154	17	0.00277	33.4442	16	0.00645
ebi-a-GCST90001684	12	0.758	0.97689	0.84533-1.1289	0.665	0.97615	0.87498-1.08902	0.847	0.99272	0.92154-1.06939	0.826	0.98115	0.83166-1.15752	0.512	0.96278	0.86272-1.07445	0.00402	0.80467	0.487	9.98174	11	0.53203	9.91724	10	0.44778
ebi-a-GCST90001558	22	0.685	1.01855	0.93308-1.1119	0.98	1.00095	0.93101-1.07614	0.848	1.00552	0.95061-1.06359	0.728	1.02099	0.90962-1.14599	0.818	1.0078	0.94406-1.07584	-0.00555	0.70735	0.4	23.5037	21	0.31772	23.3345	20	0.27267
ebi-a-GCST90001903	19	0.861	0.98775	0.86206-1.1318	0.865	1.00892	0.91051-1.11798	0.851	1.00699	0.93640-1.08290	0.447	1.07202	0.89977-1.27725	0.288	1.07419	0.94492-1.22115	0.00519	0.74654	0.688	14.1529	18	0.71907	14.0449	17	0.66392
ebi-a-GCST90002088	24	0.257	0.9686	0.91793-1.0221	0.477	0.97853	0.92172-1.03885	0.851	1.0039	0.96386-1.04560	0.745	1.02061	0.90392-1.15236	0.495	0.98179	0.93210-1.03413	0.0243	0.05798	0.714	17.225	23	0.79807	13.2245	22	0.92671
ebi-a-GCST90001955	20	0.948	0.99808	0.94322-1.0561	0.721	0.99239	0.95167-1.03485	0.855	0.99673	0.96231-1.03237	0.649	0.97496	0.87559-1.08561	0.687	0.99164	0.95254-1.03236	-0.0008	0.95191	0.584	18.9622	19	0.45926	18.9583	18	0.3944
ebi-a-GCST90002090	20	0.697	0.96555	0.81181-1.1484	0.781	0.98555	0.88944-1.09204	0.856	0.99218	0.91150-1.08000	0.375	1.08952	0.90571-1.31063	0.919	0.99443	0.89440-1.10564	0.00688	0.72655	0.037	31.1536	19	0.03883	30.9368	18	0.02928
ebi-a-GCST90002072	23	0.686	1.02112	0.92393-1.1285	0.477	1.02829	0.95212-1.11056	0.856	1.00622	0.94087-1.07610	0.561	1.0455	0.90189-1.21196	0.304	1.03426	0.97137-1.10123	-0.00563	0.69666	0.073	33.5003	22	0.05517	33.253	21	0.04349
ebi-a-GCST90001960	15	0.421	0.9829	0.94377-1.0237	0.248	0.97383	0.93097-1.01867	0.857	0.99686	0.96348-1.03141	0.879	0.9907	0.88000-1.11533	0.195	0.97294	0.93529-1.01211	0.01721	0.23408	0.496	10.1924	14	0.74799	8.63516	13	0.79991
ebi-a-GCST90002119	20	0.247	0.94247	0.85539-1.0384	0.755	0.98863	0.92021-1.06213	0.857	1.00479	0.95375-1.05856	0.812	0.98614	0.88049-1.10447	0.587	0.97821	0.90470-1.05769	0.02124	0.14209	0.609	16.7583	19	0.60624	14.401	18	0.7026
ebi-a-GCST90001468	14	0.232	0.93287	0.83719-1.0395	0.489	0.96961	0.88842-1.05823	0.861	0.99362	0.92502-1.06731	0.208	0.88593	0.74047-1.05998	0.411	0.96033	0.87473-1.05430	0.02484	0.16357	0.369	13.963	13	0.37646	11.7605	12	0.4651
ebi-a-GCST90002045	14	0.363	1.07613	0.92416-1.2531	0.69	1.02072	0.92293-1.12887	0.862	0.99326	0.92053-1.07173	0.952	0.99519	0.85313-1.16092	0.537	1.03817	0.92471-1.16556	-0.02896	0.25897	0.267	15.4792	13	0.2784	13.8577	12	0.30989
ebi-a-GCST90001725	22	0.933	0.99807	0.95437-1.0438	0.711	0.99197	0.95062-1.03513	0.863	1.00337	0.96592-1.04226	0.536	1.03666	0.92658-1.15983	0.953	1.00095	0.97006-1.03281	0.00569	0.64862	0.162	32.3296	21	0.0542	31.9873	20	0.04343
ebi-a-GCST90001433	16	0.394	1.1301	0.86050-1.4842	0.79	1.01937	0.88500-1.17414	0.863	1.00957	0.90599-1.12499	0.928	0.98708	0.74896-1.30090	0.196	1.18753	0.92569-1.52343	-0.0257	0.3911	0.035	26.0169	15	0.03785	24.6385	14	0.03831
ebi-a-GCST90001507	21	0.808	0.9899	0.91316-1.0731	0.474	0.97352	0.90453-1.04778	0.868	1.00452	0.95249-1.05939	0.537	1.03798	0.92399-1.16603	0.988	1.00049	0.93741-1.06782	0.0082	0.63607	0.435	21.1144	20	0.39043	20.8604	19	0.34456
ebi-a-GCST90002103	7	0.76	1.02013	0.90382-1.1514	0.829	0.99004	0.90414-1.08410	0.868	0.99286	0.91243-1.08038	0.941	1.00496	0.88610-1.13976	0.978	0.99865	0.91240-1.09306	-0.02417	0.54653	0.453	7.55921	6	0.27221	6.97628	5	0.22241
ebi-a-GCST90002032	17	0.841	0.99391	0.93744-1.0538	0.813	0.99436	0.94897-1.04193	0.872	0.9969	0.95998-1.03524	0.704	0.98033	0.88648-1.08412	0.733	0.99206	0.94839-1.03774	0.00144	0.89692	0.839	11.037	16	0.80719	11.0197	15	0.7512
ebi-a-GCST90001868	10	0.573	0.96643	0.86232-1.0831	0.998	0.99989	0.92731-1.07814	0.872	1.00547	0.94092-1.07444	0.984	0.99851	0.86432-1.15354	0.996	1.00019	0.92677-1.07942	0.01659	0.42667	0.869	5.07633	9	0.8276	4.37507	8	0.8218
ebi-a-GCST90001695	294	0.344	1.00002	0.99998-1.0001	0.415	1.00002	0.99997-1.00008	0.874	1	0.99997-1.00003	0.781	1.00001	0.99992-1.00010	0.674	1.00001	0.99995-1.00007	-0.00723	0.23809	0.714	277.94	293	0.72756	276.542	292	0.73355
ebi-a-GCST90001591	18	0.329	1.06139	0.94513-1.1920	0.933	1.00455	0.90369-1.11667	0.874	1.00593	0.93513-1.08208	0.339	0.9123	0.75987-1.09530	0.123	1.09948	0.98057-1.23280	-0.01762	0.26057	0.662	12.636	17	0.76019	11.2757	16	0.79216
ebi-a-GCST90001511	22	0.982	1.00068	0.94267-1.0623	0.532	0.98473	0.93833-1.03343	0.874	0.99602	0.94815-1.04630	0.236	1.07611	0.95636-1.21085	0.974	0.99932	0.96037-1.03986	-0.00437	0.77849	0.097	35.3623	21	0.02576	35.2191	20	0.01897
ebi-a-GCST90001862	15	0.416	0.96981	0.90286-1.0417	0.804	0.99091	0.92217-1.06479	0.875	1.0042	0.95318-1.05794	0.835	0.98921	0.89482-1.09356	0.862	0.99399	0.92977-1.06266	0.01965	0.18638	0.544	13.4924	14	0.48817	11.5463	13	0.56515
ebi-a-GCST90001467	21	0.492	0.94873	0.81891-1.0991	0.98	0.99856	0.89324-1.11630	0.877	1.00619	0.93053-1.08800	0.404	1.0925	0.89148-1.33884	0.198	1.10835	0.95246-1.28975	0.01369	0.36686	0.898	12.0239	20	0.91525	11.1694	19	0.91801
ebi-a-GCST90001483	25	0.598	0.98213	0.91938-1.0492	0.728	0.99003	0.93559-1.04764	0.878	1.00387	0.95548-1.05470	0.711	1.01985	0.92032-1.13014	0.576	0.98338	0.92801-1.04205	0.01502	0.33711	0.056	36.2379	24	0.05204	34.7843	23	0.05464
ebi-a-GCST90001670	19	0.918	1.00659	0.88951-1.1391	0.952	0.99699	0.90330-1.10040	0.879	1.00584	0.93336-1.08395	0.61	1.04076	0.89524-1.20992	0.723	0.9807	0.88196-1.09050	-0.00024	0.98825	0.993	5.92459	18	0.99649	5.92436	17	0.99368
ebi-a-GCST90001717	20	0.235	0.96173	0.90373-1.0234	0.184	0.96629	0.91861-1.01643	0.88	0.99608	0.94656-1.04819	0.635	1.0343	0.90200-1.18600	0.117	0.95973	0.91374-1.00804	0.02941	0.09534	0.012	38.7326	19	0.00478	33.0442	18	0.01649
ebi-a-GCST90001705	20	0.776	0.98862	0.91471-1.0685	0.157	0.96041	0.90822-1.01560	0.881	1.00453	0.94708-1.06545	0.849	1.01376	0.88216-1.16499	0.163	0.96267	0.91452-1.01336	0.01052	0.53568	0.025	43.1304	19	0.00124	42.1957	18	0.00104
ebi-a-GCST90001434	16	0.335	1.0605	0.94500-1.1901	0.479	1.03615	0.93904-1.14330	0.883	1.00581	0.93133-1.08625	0.437	1.06951	0.90688-1.26130	0.39	1.03954	0.95400-1.13274	-0.01831	0.25196	0.3	18.9096	15	0.21786	17.1594	14	0.24778
ebi-a-GCST90001853	21	0.972	0.99863	0.92548-1.0776	0.839	0.99313	0.92936-1.06127	0.884	0.99655	0.95124-1.04402	0.405	1.04863	0.93996-1.16987	0.995	0.9998	0.93506-1.06902	-0.00086	0.94649	0.682	17.3375	20	0.63096	17.3329	19	0.56733
ebi-a-GCST90001642	27	0.996	0.99968	0.88736-1.1262	0.591	1.02854	0.92829-1.13962	0.889	0.99528	0.93135-1.06360	0.646	0.96331	0.82260-1.12808	0.485	1.04238	0.92918-1.16938	-0.00096	0.93107	0.894	17.6543	26	0.88799	17.6467	25	0.85702
ebi-a-GCST90001999	18	0.227	1.07021	0.96280-1.1896	0.555	1.02398	0.94654-1.10776	0.89	0.99594	0.94038-1.05480	0.697	1.02517	0.90636-1.15955	0.509	1.03162	0.94231-1.12938	-0.02673	0.13211	0.857	11.1061	17	0.851	8.58802	16	0.92941
ebi-a-GCST90001827	20	0.225	0.91935	0.80624-1.0483	0.249	0.95675	0.88748-1.03143	0.891	0.9949	0.92469-1.07045	0.162	0.89792	0.77665-1.03814	0.255	0.95564	0.88598-1.03078	0.02337	0.17706	0.048	32.5795	19	0.02687	29.3599	18	0.04415
ebi-a-GCST90002107	5	0.819	0.97	0.76339-1.2325	0.673	1.0188	0.93424-1.11102	0.894	1.0047	0.93771-1.07647	0.618	1.02811	0.92974-1.13689	0.754	1.01444	0.93311-1.10286	0.03168	0.78252	0.619	3.41272	4	0.49127	3.31216	3	0.34595
ebi-a-GCST90001755	26	0.657	1.03345	0.89520-1.1930	0.607	1.0301	0.92015-1.15319	0.894	0.99494	0.92322-1.07222	0.931	1.00835	0.83775-1.21368	0.807	1.01839	0.88133-1.17678	-0.00913	0.54751	0.256	28.6337	25	0.27952	28.1964	24	0.25184
ebi-a-GCST90001574	20	0.535	0.96	0.84594-1.0894	0.666	0.97864	0.88716-1.07955	0.897	0.9948	0.91921-1.07661	0.647	0.95919	0.80463-1.14343	0.736	0.97735	0.85715-1.11441	0.01263	0.48506	0.018	32.8366	19	0.0251	31.9349	18	0.02238
ebi-a-GCST90002115	16	0.878	0.98535	0.81913-1.1853	0.952	1.00378	0.88794-1.13474	0.902	1.00583	0.91699-1.10329	0.173	0.86798	0.71488-1.05388	0.923	0.9917	0.84006-1.17072	0.00473	0.80247	0.378	16.3239	15	0.36086	16.2484	14	0.29844
ebi-a-GCST90001672	23	0.529	1.02306	0.95411-1.0970	0.363	1.03459	0.96150-1.11324	0.903	1.00307	0.95495-1.05361	0.421	1.05083	0.93329-1.18318	0.426	1.03022	0.95866-1.10711	-0.0099	0.44342	0.869	14.3759	22	0.8876	13.7656	21	0.87945
ebi-a-GCST90001856	25	0.424	1.04134	0.94452-1.1481	0.95	1.00246	0.92859-1.08221	0.903	1.00349	0.94884-1.06129	0.458	0.94138	0.80474-1.10122	0.922	1.00386	0.92985-1.08376	-0.01334	0.3724	0.28	28.4968	24	0.23964	27.507	23	0.235
ebi-a-GCST90001624	21	0.933	0.99808	0.95497-1.0431	0.517	1.01777	0.96502-1.07340	0.904	0.9979	0.96436-1.03262	0.804	1.01331	0.91430-1.12305	0.905	0.99756	0.95892-1.03776	-0.00012	0.99034	0.568	18.2472	20	0.57113	18.247	19	0.506
ebi-a-GCST90001547	18	0.487	0.96727	0.88249-1.0602	0.64	0.97937	0.89733-1.06890	0.905	0.99586	0.93027-1.06608	0.915	1.00848	0.86552-1.17505	0.587	0.97757	0.90210-1.05935	0.01025	0.36644	0.967	8.22755	17	0.96144	7.36357	16	0.9656
ebi-a-GCST90001450	19	0.667	0.98745	0.93315-1.0449	0.917	0.9969	0.94017-1.05705	0.906	0.99733	0.95393-1.04270	0.296	1.06499	0.94955-1.19448	0.954	1.00161	0.94958-1.05649	0.00605	0.58357	0.811	13.7282	18	0.74663	13.4159	17	0.70793
ebi-a-GCST90001847	25	0.223	0.9577	0.89511-1.0247	0.331	0.96965	0.91128-1.03176	0.909	0.99698	0.94685-1.04977	0.913	0.99421	0.89638-1.10272	0.356	0.97404	0.92210-1.02891	0.01894	0.09949	0.176	31.6548	24	0.13579	28.0599	23	0.21353
ebi-a-GCST90002094	15	0.86	1.00701	0.93349-1.0863	0.446	0.97566	0.91570-1.03955	0.911	0.99758	0.95614-1.04082	0.925	0.99444	0.88688-1.11503	0.545	0.97624	0.90481-1.05332	-0.00418	0.77033	0.401	14.0169	14	0.44845	13.9218	13	0.37938
ebi-a-GCST90001871	24	0.74	1.01816	0.91679-1.1307	0.514	1.02234	0.95666-1.09253	0.912	0.99679	0.94144-1.05539	0.223	0.92608	0.82120-1.04436	0.663	1.01393	0.95360-1.07809	-0.0084	0.63855	0.024	41.5201	23	0.01032	41.0963	22	0.00803
ebi-a-GCST90002100	19	0.939	0.9952	0.88145-1.1236	0.335	1.04711	0.95356-1.14984	0.913	0.99629	0.93242-1.06455	0.599	1.04227	0.89563-1.21293	0.535	1.04227	0.91677-1.18496	0.00037	0.98312	0.377	19.4218	18	0.36629	19.4213	17	0.30489
ebi-a-GCST90001556	12	0.966	1.00128	0.94612-1.0597	0.794	0.99209	0.93466-1.05304	0.913	1.00261	0.95670-1.05072	0.821	1.01081	0.92273-1.10731	0.97	1.00102	0.95011-1.05467	0.00108	0.93656	0.739	8.54226	11	0.66406	8.5356	10	0.57667
ebi-a-GCST90001404	22	0.777	1.01122	0.93692-1.0914	0.727	1.01118	0.95002-1.07629	0.913	1.00327	0.94604-1.06396	0.855	0.98365	0.82616-1.17116	0.79	1.00818	0.95018-1.06972	-0.00484	0.74617	0.101	32.6997	21	0.04966	32.5245	20	0.03802
ebi-a-GCST90001916	12	0.102	0.77246	0.58316-1.0232	0.956	0.99585	0.85967-1.15360	0.915	1.00603	0.90148-1.12270	0.837	0.9701	0.73172-1.28614	0.88	0.97711	0.72836-1.31081	0.04835	0.07456	0.357	11.6539	11	0.39022	7.69197	10	0.6589
ebi-a-GCST90001419	16	0.724	1.02654	0.88999-1.1840	0.65	1.01971	0.93723-1.10946	0.915	1.00554	0.90833-1.11315	0.084	1.20337	0.98899-1.46422	0.577	1.02383	0.94420-1.11017	-0.009	0.68289	0.006	40.6096	15	0.00037	40.111	14	0.00025
ebi-a-GCST90001733	19	0.35	1.09774	0.90774-1.3275	0.7	1.02377	0.90865-1.15347	0.917	1.00576	0.90334-1.11978	0.787	1.02638	0.85204-1.23639	0.635	1.03348	0.90402-1.18147	-0.01911	0.29038	0.02	33.1652	18	0.01594	30.994	17	0.02001
ebi-a-GCST90001427	23	0.644	0.96777	0.84402-1.1097	0.708	0.97664	0.86301-1.10522	0.918	1.00404	0.92969-1.08433	0.414	1.07786	0.90355-1.28580	0.866	0.98777	0.85787-1.13734	0.00772	0.53072	0.738	18.0702	22	0.70182	17.6638	21	0.67017
ebi-a-GCST90001846	14	0.582	1.0607	0.86498-1.3007	0.662	0.97829	0.88673-1.07930	0.92	1.00458	0.91912-1.09798	0.761	1.02747	0.86577-1.21936	0.745	0.98243	0.88504-1.09055	-0.01412	0.56996	0.165	19.049	13	0.12159	18.5224	12	0.10073
ebi-a-GCST90002022	17	0.269	1.15425	0.90359-1.4744	0.615	1.02672	0.92635-1.13795	0.921	0.99539	0.90803-1.09116	0.596	1.04287	0.89569-1.21424	0.672	1.02554	0.91451-1.15005	-0.03222	0.22173	0.114	24.1808	16	0.08563	21.8167	15	0.1127
ebi-a-GCST90001878	19	0.096	1.04969	0.99459-1.1078	0.263	1.02295	0.98307-1.06445	0.923	0.99803	0.95923-1.03841	0.842	1.01066	0.91221-1.11973	0.262	1.02181	0.98518-1.05981	-0.0335	0.02694	0.147	29.1906	18	0.0461	21.7056	17	0.19631
ebi-a-GCST90001513	19	0.723	1.01725	0.92678-1.1165	0.831	0.99116	0.91338-1.07556	0.923	1.00292	0.94564-1.06366	0.138	1.11033	0.97284-1.26725	0.903	1.0048	0.93108-1.08435	-0.00582	0.70505	0.728	14.479	18	0.69738	14.3308	17	0.64356
ebi-a-GCST90001655	22	0.381	1.05348	0.94001-1.1806	0.978	1.00154	0.89891-1.11590	0.923	0.99656	0.92903-1.06900	0.637	0.95426	0.78801-1.15558	0.425	1.04844	0.93551-1.17502	-0.01693	0.23948	0.508	19.6241	21	0.54517	18.1541	20	0.57725
ebi-a-GCST90002114	18	0.839	1.01839	0.85648-1.2109	0.362	0.94953	0.84955-1.06127	0.925	0.99587	0.91420-1.08484	0.569	0.95172	0.80540-1.12462	0.382	0.94557	0.83685-1.06841	-0.00632	0.77263	0.183	22.6802	17	0.15995	22.5585	16	0.12606
ebi-a-GCST90001963	20	0.909	0.99722	0.95158-1.0451	0.814	0.99484	0.95293-1.03860	0.928	1.00171	0.96537-1.03942	0.603	0.97516	0.88833-1.07049	0.702	0.99264	0.95629-1.03037	0.00355	0.75351	0.208	25.5398	19	0.14353	25.3963	18	0.11438
ebi-a-GCST90001449	16	0.716	0.97112	0.83174-1.1339	0.416	0.95687	0.86049-1.06406	0.93	0.99611	0.91293-1.08686	0.907	0.98953	0.83202-1.17687	0.425	0.95912	0.86797-1.05983	0.00803	0.69934	0.168	21.5204	15	0.12101	21.2841	14	0.09457
ebi-a-GCST90001969	16	0.96	1.0024	0.91531-1.0978	0.895	0.99437	0.91409-1.08171	0.932	0.99741	0.93967-1.05870	0.95	1.00434	0.87807-1.14877	0.986	1.00072	0.92621-1.08123	-0.00186	0.88872	0.787	11.834	15	0.69155	11.8137	14	0.62127
ebi-a-GCST90001900	5	0.412	0.8475	0.60240-1.1923	0.406	0.94987	0.84134-1.07241	0.933	1.00828	0.83140-1.22278	0.508	0.93539	0.78106-1.12020	0.45	0.94841	0.83767-1.07380	0.05105	0.32177	0.168	12.4026	4	0.0146	8.45397	3	0.0375
ebi-a-GCST90001746	21	0.208	1.08463	0.95978-1.2257	0.814	1.0113	0.92104-1.11041	0.937	1.00341	0.92262-1.09128	0.541	1.05652	0.88829-1.25662	0.389	1.04237	0.95045-1.14317	-0.02812	0.11392	0.015	35.2756	20	0.01868	30.8211	19	0.04223
ebi-a-GCST90001604	15	0.358	1.16386	0.85211-1.5897	0.804	0.98275	0.85674-1.12728	0.938	1.00414	0.90549-1.11353	0.782	1.03072	0.83534-1.27180	0.845	0.9823	0.82359-1.17159	-0.02994	0.34318	0.182	18.6372	14	0.17928	17.3458	13	0.18397
ebi-a-GCST90002006	25	0.889	1.00477	0.94079-1.0731	0.946	1.0021	0.94313-1.06475	0.939	0.99834	0.95679-1.04170	0.855	0.99098	0.90013-1.09101	0.972	1.00123	0.93468-1.07252	-0.00322	0.80436	0.572	21.235	24	0.62483	21.1722	23	0.57057
ebi-a-GCST90001977	16	0.604	1.02179	0.94355-1.1065	0.61	0.98082	0.91046-1.05661	0.939	0.99757	0.93702-1.06203	0.358	0.92565	0.78910-1.08582	0.482	0.97473	0.90926-1.04491	-0.01377	0.35383	0.309	18.7677	15	0.22446	17.6108	14	0.22509
ebi-a-GCST90001625	24	0.34	0.9217	0.78251-1.0856	0.22	0.93062	0.82965-1.04389	0.94	0.99644	0.90789-1.09362	0.77	0.96784	0.77946-1.20176	0.355	0.94546	0.84147-1.06229	0.01622	0.27009	0.099	32.9711	23	0.08157	31.1583	22	0.09292
ebi-a-GCST90001855	15	0.641	1.02401	0.92883-1.1290	0.981	0.9992	0.93666-1.06591	0.94	0.99766	0.93842-1.06064	0.76	1.01424	0.92804-1.10843	0.917	1.00335	0.94346-1.06703	-0.01183	0.50753	0.207	20.325	14	0.12022	19.624	13	0.10499
ebi-a-GCST90001866	14	0.171	0.86904	0.71951-1.0496	0.57	0.97053	0.87526-1.07616	0.941	0.99674	0.91474-1.08609	0.743	1.02725	0.87784-1.20209	0.621	0.97338	0.87682-1.08058	0.03689	0.14079	0.212	17.7649	13	0.16665	14.7155	12	0.25737
ebi-a-GCST90001876	16	0.26	1.03073	0.97998-1.0841	0.406	1.01618	0.97840-1.05542	0.943	0.99864	0.96228-1.03638	0.48	0.96916	0.89036-1.05495	0.603	1.00902	0.97611-1.04305	-0.02847	0.11094	0.078	28.4003	15	0.01919	23.5336	14	0.05212
ebi-a-GCST90001845	25	0.707	1.01589	0.93659-1.1019	0.517	1.02134	0.95816-1.08869	0.944	1.00194	0.94929-1.05752	0.986	1.00118	0.87854-1.14093	0.605	1.01532	0.95921-1.07472	-0.00607	0.65539	0.099	34.2594	24	0.08016	33.9576	23	0.06577
ebi-a-GCST90001581	21	0.181	0.95846	0.90269-1.0177	0.878	0.99456	0.92740-1.06658	0.945	0.99832	0.95163-1.04730	0.98	0.99858	0.89549-1.11355	0.623	0.98607	0.93328-1.04185	0.02375	0.04311	0.456	20.5206	20	0.42582	15.8228	19	0.66907
ebi-a-GCST90001514	17	0.319	1.04837	0.95840-1.1468	0.712	1.01427	0.94087-1.09339	0.945	1.00224	0.94016-1.06843	0.961	0.99711	0.88858-1.11890	0.68	1.01423	0.94950-1.08338	-0.02171	0.19221	0.094	24.9241	16	0.07117	22.1683	15	0.10347
ebi-a-GCST90001635	24	0.785	0.98299	0.87053-1.1100	0.61	1.02238	0.93893-1.11324	0.946	0.99761	0.93134-1.06861	0.649	0.96521	0.83033-1.12200	0.974	0.99819	0.89523-1.11300	0.00502	0.77315	0.117	31.6833	23	0.10691	31.5611	22	0.08519
ebi-a-GCST90002096	19	0.389	1.07954	0.91121-1.2790	0.851	0.99158	0.90791-1.08297	0.946	0.99758	0.92990-1.07018	0.853	0.98754	0.86632-1.12572	0.917	1.0056	0.90618-1.11593	-0.02499	0.32986	0.129	25.2587	18	0.11795	23.8472	17	0.12365
ebi-a-GCST90001864	22	0.802	1.01493	0.90542-1.1377	0.865	1.00639	0.93500-1.08322	0.951	1.00189	0.94360-1.06377	0.593	1.03173	0.92167-1.15492	0.542	1.02196	0.95415-1.09460	-0.00435	0.79505	0.182	27.5035	21	0.1548	27.4085	20	0.12416
ebi-a-GCST90001890	11	0.733	0.96276	0.77904-1.1898	0.323	0.94518	0.84523-1.05695	0.952	0.99666	0.89415-1.11092	0.286	0.91666	0.78792-1.06644	0.214	0.93115	0.83808-1.03456	0.01029	0.71319	0.084	18.6337	10	0.04517	18.3404	9	0.03142
ebi-a-GCST90001905	15	0.419	0.96291	0.88118-1.0522	0.497	0.97281	0.89837-1.05342	0.952	0.998	0.93467-1.06562	0.781	0.98236	0.86839-1.11129	0.408	0.96814	0.89874-1.04289	0.02021	0.26785	0.237	18.405	14	0.18895	16.6851	13	0.2141
ebi-a-GCST90002104	12	0.478	0.97894	0.92510-1.0359	0.966	1.00109	0.95186-1.05287	0.952	1.00118	0.96310-1.04076	0.671	1.01643	0.94469-1.09361	0.903	0.99675	0.94703-1.04907	0.01964	0.31033	0.757	7.27062	11	0.77676	6.12854	10	0.80435
ebi-a-GCST90001422	21	0.291	0.9564	0.88247-1.0365	0.684	0.98515	0.91658-1.05884	0.953	0.99811	0.93730-1.06287	0.563	1.05215	0.88824-1.24631	0.62	0.98315	0.92029-1.05031	0.02094	0.13001	0.062	32.5789	20	0.03751	28.7843	19	0.06945
ebi-a-GCST90002064	9	0.956	0.99568	0.85933-1.1537	0.766	1.01902	0.90029-1.15340	0.953	0.99716	0.90661-1.09675	0.442	0.92323	0.76072-1.12046	0.681	1.03729	0.87652-1.22754	0.00046	0.98009	0.813	4.73432	8	0.78556	4.73365	7	0.69243
ebi-a-GCST90001517	26	0.799	1.00436	0.97174-1.0381	0.546	0.98822	0.95090-1.02700	0.955	1.00078	0.97413-1.02815	0.933	0.99752	0.94178-1.05655	0.638	0.99133	0.95642-1.02750	-0.00325	0.71625	0.598	22.3339	25	0.6164	22.1986	24	0.56741
ebi-a-GCST90001551	22	0.769	1.01475	0.92165-1.1173	0.976	0.99872	0.91803-1.08650	0.956	0.99779	0.92294-1.07872	0.186	0.86706	0.70679-1.06368	0.877	0.99351	0.91592-1.07767	-0.00736	0.55259	0.188	30.4398	21	0.0835	29.8944	20	0.07158
ebi-a-GCST90001576	13	0.932	0.98569	0.71434-1.3601	0.817	0.98281	0.84884-1.13791	0.957	0.99574	0.85213-1.16356	0.942	0.99156	0.79320-1.23951	0.724	0.96756	0.80913-1.15703	0.00211	0.94421	0.009	29.6915	12	0.00311	29.6777	11	0.00178
ebi-a-GCST90001952	19	0.281	0.96507	0.90651-1.0274	0.53	0.98714	0.94809-1.02780	0.958	1.00115	0.95907-1.04507	0.886	0.99137	0.88244-1.11375	0.443	0.98463	0.94721-1.02352	0.0198	0.14392	0.117	29.3773	18	0.04396	25.8135	17	0.07793
ebi-a-GCST90001736	21	0.551	1.05117	0.89483-1.2348	0.751	1.01833	0.91044-1.13901	0.959	0.99769	0.91369-1.08943	0.583	1.05102	0.88257-1.25161	0.678	1.02463	0.91513-1.14724	-0.01348	0.4553	0.132	28.9044	20	0.08966	28.0468	19	0.08253
ebi-a-GCST90001698	607	0.735	1	0.99998-1.0000	0.446	0.99999	0.99997-1.00002	0.959	1	0.99998-1.00001	0.666	0.99999	0.99994-1.00004	0.561	0.99999	0.99995-1.00003	-0.00266	0.58156	0.081	657.73	606	0.07151	657.4	605	0.0689
ebi-a-GCST90001545	10	0.853	1.01774	0.85015-1.2184	0.957	1.00356	0.88102-1.14314	0.96	0.99753	0.90508-1.09942	0.751	1.02843	0.86924-1.21678	0.994	0.99949	0.88013-1.13503	-0.0061	0.79693	0.486	9.52533	9	0.39026	9.44179	8	0.30641
ebi-a-GCST90001933	23	0.832	1.00609	0.95178-1.0635	0.266	1.03453	0.97446-1.09831	0.963	0.99899	0.95768-1.04209	0.591	1.03141	0.92284-1.15275	0.92	1.0027	0.95169-1.05645	-0.00554	0.69571	0.286	25.0526	22	0.29457	24.8664	21	0.253
ebi-a-GCST90001718	17	0.851	0.99339	0.92810-1.0633	0.21	0.9628	0.90744-1.02154	0.963	0.99885	0.95176-1.04828	0.482	1.05089	0.91804-1.20297	0.051	0.93907	0.88580-0.99555	0.00451	0.81948	0.123	23.9982	16	0.08954	23.9122	15	0.0666
ebi-a-GCST90001860	23	0.879	0.99428	0.92446-1.0694	0.869	0.99518	0.93971-1.05392	0.963	0.999	0.95757-1.04223	0.911	1.00458	0.92831-1.08711	0.975	0.9991	0.94489-1.05641	0.0022	0.87685	0.738	18.6038	22	0.66965	18.5791	21	0.61212
ebi-a-GCST90001628	24	0.165	0.96121	0.91067-1.0146	0.607	0.9857	0.93308-1.04128	0.964	0.99907	0.95973-1.04002	0.216	1.07208	0.96297-1.19356	0.527	0.98465	0.93930-1.03220	0.02095	0.04766	0.557	21.6109	23	0.54383	17.2114	22	0.75159
ebi-a-GCST90001669	35	0.858	1.00131	0.98718-1.0156	0.737	0.99723	0.98124-1.01348	0.966	0.99973	0.98771-1.01190	0.847	0.99784	0.97643-1.01972	0.765	0.99784	0.98394-1.01195	-0.0043	0.67082	0.267	39.2934	34	0.24469	39.0756	33	0.21554
ebi-a-GCST90001488	16	0.469	0.96671	0.88425-1.0569	0.957	1.00239	0.91937-1.09292	0.966	0.99864	0.93828-1.06288	0.854	0.98833	0.87378-1.11789	0.857	0.9922	0.91252-1.07884	0.01329	0.33462	0.652	13.0619	15	0.59752	12.0633	14	0.60122
ebi-a-GCST90002058	20	0.714	0.987	0.92122-1.0575	0.861	1.00645	0.93664-1.08146	0.968	1.00102	0.95229-1.05226	0.919	1.00527	0.90941-1.11124	0.965	0.99832	0.92602-1.07626	0.00674	0.56844	0.738	14.6873	19	0.74225	14.3497	18	0.70602
ebi-a-GCST90001818	12	0.86	1.02762	0.76505-1.3803	0.687	1.03669	0.86994-1.23542	0.97	1.00255	0.87773-1.14511	0.992	0.99879	0.79375-1.25678	0.666	1.04431	0.86212-1.26501	-0.00469	0.85606	0.338	12.6884	11	0.31418	12.6446	10	0.24423
ebi-a-GCST90001550	21	0.655	1.03663	0.88765-1.2106	0.884	0.99191	0.88900-1.10674	0.972	1.00145	0.92476-1.08449	0.753	0.97205	0.81698-1.15656	0.684	0.97011	0.83987-1.12055	-0.00813	0.61707	0.981	9.03314	20	0.98252	8.77473	19	0.97704
ebi-a-GCST90001716	20	0.432	0.96918	0.89799-1.0460	0.099	0.95485	0.90392-1.00865	0.974	0.99906	0.94477-1.05648	0.375	0.94791	0.84457-1.06389	0.096	0.95442	0.90585-1.00559	0.02171	0.27101	0.024	40.2543	19	0.00303	37.563	18	0.00442
ebi-a-GCST90002071	16	0.476	1.01541	0.97471-1.0578	0.684	1.00637	0.97604-1.03764	0.974	1.0006	0.96472-1.03781	0.864	1.01084	0.89537-1.14120	0.64	1.00776	0.97630-1.04023	-0.01882	0.18218	0.311	25.395	15	0.04488	22.2615	14	0.0734
ebi-a-GCST90001975	16	0.691	1.01029	0.96163-1.0614	0.986	0.99965	0.96205-1.03871	0.975	0.9993	0.95624-1.04430	0.856	0.98865	0.87554-1.11636	0.843	1.00343	0.97062-1.03735	-0.01383	0.34893	0.097	29.8944	15	0.01231	28.0149	14	0.01416
ebi-a-GCST90001658	28	0.932	0.99811	0.95632-1.0417	0.788	0.99417	0.95268-1.03747	0.976	1.00052	0.96664-1.03559	0.729	0.98532	0.90697-1.07045	0.99	0.99976	0.96410-1.03673	0.00179	0.8482	0.186	35.5775	27	0.12483	35.5265	26	0.10073
ebi-a-GCST90001838	23	0.903	1.00557	0.92039-1.0986	0.8	0.99187	0.93107-1.05664	0.979	1.00068	0.95171-1.05217	0.652	0.97165	0.85907-1.09898	0.737	0.98889	0.92715-1.05474	-0.00179	0.89588	0.325	25.1683	22	0.2891	25.1472	21	0.24084
ebi-a-GCST90001512	23	0.517	0.98673	0.94835-1.0267	0.493	0.98466	0.94205-1.02920	0.983	0.99965	0.96759-1.03277	0.252	1.05125	0.96721-1.14260	0.468	0.98554	0.94818-1.02438	0.01276	0.27267	0.91	13.6274	22	0.91417	12.3584	21	0.92943
ebi-a-GCST90001626	20	0.396	0.90809	0.73071-1.1285	0.927	1.00652	0.87673-1.15551	0.985	1.00096	0.90815-1.10325	0.799	0.9698	0.76805-1.22455	0.919	0.99249	0.85943-1.14616	0.01685	0.339	0.276	22.672	19	0.2521	21.5186	18	0.25406
ebi-a-GCST90002105	16	0.921	1.00322	0.94280-1.0675	0.996	0.99986	0.95108-1.05115	0.985	1.00042	0.95836-1.04433	0.742	0.98357	0.89297-1.08337	0.97	1.00086	0.95735-1.04634	-0.00194	0.90149	0.31	19.2651	15	0.20197	19.2432	14	0.15586
ebi-a-GCST90001713	15	0.645	1.05297	0.84983-1.3047	0.852	0.98657	0.85558-1.13761	0.987	0.99905	0.89213-1.11879	0.355	1.15378	0.86073-1.54659	0.913	1.01035	0.84218-1.21210	-0.01446	0.57732	0.023	28.0242	14	0.01412	27.3371	13	0.01118
ebi-a-GCST90002121	20	0.467	1.06424	0.90294-1.2544	0.648	1.02406	0.92474-1.13404	0.987	0.99936	0.92430-1.08051	0.303	1.09285	0.92709-1.28825	0.672	1.02513	0.91542-1.14799	-0.01839	0.40421	0.212	23.9778	19	0.19701	23.0436	18	0.18892
ebi-a-GCST90001526	19	0.785	1.00767	0.95471-1.0636	0.815	1.0055	0.96037-1.05276	0.988	0.99974	0.96471-1.03603	0.978	1.00103	0.93222-1.07492	0.599	1.01105	0.97115-1.05258	-0.00548	0.70147	0.259	22.6324	18	0.20511	22.4319	17	0.16868
ebi-a-GCST90001478	13	0.935	1.00397	0.91490-1.1017	0.843	0.99185	0.91471-1.07550	0.989	0.99957	0.94115-1.06162	0.363	0.94416	0.83819-1.06351	0.804	0.99076	0.92227-1.06433	-0.00247	0.90228	0.444	12.8244	12	0.38193	12.806	11	0.30619
ebi-a-GCST90002005	21	0.522	1.03566	0.93212-1.1507	0.42	1.02972	0.95898-1.10568	0.99	1.00044	0.93194-1.07398	0.431	1.06895	0.90858-1.25763	0.279	1.03944	0.97099-1.11271	-0.01568	0.39249	0.044	33.1117	20	0.0328	31.829	19	0.03267
ebi-a-GCST90001465	21	0.732	1.00877	0.96041-1.0596	0.813	0.99471	0.95199-1.03934	0.99	0.99976	0.96170-1.03932	0.807	1.01143	0.92441-1.10665	0.857	0.99657	0.96048-1.03402	-0.0094	0.55529	0.202	26.7927	20	0.1412	26.2937	19	0.12221
ebi-a-GCST90001877	17	0.946	1.00263	0.93078-1.0800	0.289	1.02498	0.97927-1.07281	0.992	0.99977	0.95287-1.04897	0.74	0.98384	0.89511-1.08136	0.345	1.02056	0.97955-1.06330	-0.00195	0.92084	0.024	37.5636	16	0.00175	37.5381	15	0.00106
ebi-a-GCST90001485	30	0.942	0.99868	0.96432-1.0343	0.896	0.99747	0.96031-1.03606	0.993	1.00013	0.97302-1.02800	0.635	1.01677	0.94995-1.08830	0.844	1.00279	0.97553-1.03081	0.00141	0.89352	0.108	38.9194	29	0.10322	38.8941	28	0.08264
ebi-a-GCST90001704	20	0.445	0.97265	0.90725-1.0428	0.059	0.95295	0.90652-1.00176	0.998	0.99993	0.94744-1.05532	0.942	0.99618	0.89970-1.10301	0.089	0.95934	0.91674-1.00391	0.02062	0.24188	0.012	42.3685	19	0.00158	39.1809	18	0.00269

## Sheet: S1.2_UK-Biobank
The resluts of forward univariable MR analysis between immune cells phenotypes and the risk of AAA in UK Bio-Bank database.
id	nsnp	MR-Egger			Weighted median			Inverse variance weighted			Simple mode			Weighted mode			MR-Egger intercept		MR-PRESSO global	MR-IVW			MR-Egeer
		p_value	OR	95% OR	p_value	OR	95% OR	p_value	OR	95% OR	p_value	OR	95% OR	p_value	OR	95% OR	egger intercept	p_value	p_value	Q	Q_df	Q_pval	Q	Q_df	Q_pval
ebi-a-GCST90001561	27	0.002	1.16529	1.06637-1.2734	0.016	1.1447	1.02576-1.27744	0.001	1.1382	1.05570-1.22714	0.041	1.21914	1.01779-1.46033	0.005	1.15986	1.05615-1.27375	-0.02752	0.33597	0.85	19.8371	26	0.79922	18.8746	25	0.80309
ebi-a-GCST90002060	25	0.056	0.85359	0.73163-0.9959	0.197	0.88963	0.74479-1.06265	0.003	0.83959	0.74781-0.94264	0.346	0.86821	0.65091-1.15805	0.178	0.88312	0.74078-1.05282	-0.00804	0.75159	0.537	23.3333	24	0.5002	23.2297	23	0.44743
ebi-a-GCST90002117	25	0.023	1.16717	1.03053-1.3219	0.036	1.16836	1.01060-1.35073	0.004	1.14884	1.04627-1.26147	0.644	1.05884	0.83355-1.34501	0.046	1.15352	1.00986-1.31761	-0.00962	0.70924	0.837	18.0628	24	0.79995	17.9203	23	0.7618
ebi-a-GCST90001931	8	0.064	1.91213	1.09292-3.3454	0.009	1.64245	1.13088-2.38542	0.004	1.46012	1.12664-1.89231	0.05	1.8686	1.11133-3.14187	0.036	1.8063	1.15321-2.82923	-0.06731	0.32834	0.407	7.37243	7	0.39116	6.20251	6	0.40089
ebi-a-GCST90001970	18	0.006	1.22037	1.07764-1.3820	0.054	1.13455	0.99769-1.29018	0.006	1.14323	1.03956-1.25724	0.341	0.90025	0.72954-1.11092	0.025	1.16551	1.03141-1.31705	-0.05391	0.13015	0.964	6.99367	17	0.98363	4.44786	16	0.99789
ebi-a-GCST90002067	22	0.131	0.85441	0.70227-1.0395	0.081	0.8347	0.68154-1.02229	0.009	0.84022	0.73796-0.95666	0.678	0.92759	0.65346-1.31671	0.076	0.83459	0.69034-1.00899	-0.00801	0.82252	0.534	20.9544	21	0.46173	20.9004	20	0.40302
ebi-a-GCST90002095	23	0.189	0.82358	0.62227-1.0900	0.012	0.79225	0.66101-0.94955	0.009	0.83229	0.72450-0.95611	0.713	0.94733	0.71294-1.25878	0.078	0.80503	0.63960-1.01324	0.00388	0.93286	0.225	27.3998	22	0.19644	27.3903	21	0.15831
ebi-a-GCST90002057	17	0.173	0.75501	0.51394-1.1092	0.002	0.68228	0.53329-0.87289	0.01	0.76382	0.62255-0.93715	0.67	1.1037	0.70731-1.72225	0.008	0.67434	0.52273-0.86993	0.00329	0.94454	0.256	20.589	16	0.19485	20.5821	15	0.15072
ebi-a-GCST90001619	32	0	1.31552	1.14688-1.5090	0.02	1.20236	1.02964-1.40405	0.012	1.1542	1.03198-1.29091	0.799	1.03607	0.79102-1.35704	0.018	1.20359	1.04085-1.39178	-0.06611	0.00858	0.235	36.9542	31	0.21299	29.0425	30	0.51536
ebi-a-GCST90001585	22	0.755	1.05091	0.77243-1.4298	0.389	1.10911	0.87608-1.40414	0.012	1.2604	1.05156-1.51072	0.54	1.16364	0.72253-1.87404	0.26	1.14704	0.90944-1.44671	0.06709	0.17265	0.297	24.249	21	0.28115	22.0443	20	0.33811
ebi-a-GCST90001731	23	0.463	0.86719	0.59680-1.2601	0.787	0.96242	0.72854-1.27137	0.015	0.7728	0.62781-0.95127	0.886	1.04906	0.54993-2.00123	0.488	1.14035	0.79138-1.64319	-0.02814	0.47301	0.105	29.7122	22	0.12563	28.9754	21	0.11459
ebi-a-GCST90001548	26	0.438	1.11329	0.85273-1.4535	0.853	1.02752	0.77059-1.37012	0.017	1.22817	1.03810-1.45303	0.029	1.86698	1.10216-3.16251	0.581	0.91242	0.66196-1.25763	0.03256	0.36133	0.397	24.9013	25	0.46791	24.0341	24	0.45965
ebi-a-GCST90001647	27	0.112	1.11531	0.97967-1.2697	0.235	1.09353	0.94356-1.26735	0.02	1.1278	1.01888-1.24836	0.719	1.05098	0.80358-1.37454	0.252	1.08624	0.94594-1.24734	0.00683	0.78887	0.631	23.8094	26	0.58686	23.7362	25	0.53466
ebi-a-GCST90001554	23	0.052	0.84914	0.72655-0.9924	0.035	0.8441	0.72125-0.98788	0.022	0.86815	0.76940-0.97958	0.938	1.01116	0.76654-1.33383	0.035	0.85134	0.73961-0.97995	0.01173	0.65511	0.315	26.9512	22	0.21309	26.6902	21	0.18134
ebi-a-GCST90001566	18	0.054	1.42819	1.02004-1.9997	0.326	1.17396	0.85254-1.61656	0.024	1.26927	1.03244-1.56043	0.049	1.77384	1.04422-3.01326	0.404	1.14447	0.84010-1.55911	-0.03709	0.39715	0.529	16.1755	17	0.51143	15.4185	16	0.49423
ebi-a-GCST90002097	21	0.062	1.29898	1.00358-1.6813	0.047	1.20547	1.00274-1.44919	0.024	1.15892	1.01978-1.31705	0.216	1.21617	0.90090-1.64177	0.063	1.22412	1.00059-1.49759	-0.04287	0.33083	0.485	20.3362	20	0.43708	19.3233	19	0.43628
ebi-a-GCST90001761	29	0.796	1.04692	0.74240-1.4763	0.073	1.23962	0.98041-1.56735	0.025	1.19329	1.02225-1.39295	0.106	1.41394	0.94168-2.12303	0.111	1.31537	0.94907-1.82304	0.03464	0.41066	0.48	27.3569	28	0.49888	26.6585	27	0.48233
ebi-a-GCST90001560	27	0.077	1.06228	0.99624-1.1327	0.102	1.07225	0.98635-1.16562	0.026	1.06891	1.00796-1.13353	0.58	1.04442	0.89724-1.21574	0.054	1.073	1.00218-1.14883	0.01087	0.64244	0.916	17.4811	26	0.89383	17.2602	25	0.87214
ebi-a-GCST90001425	29	0.092	0.89141	0.78351-1.0142	0.08	0.88546	0.77259-1.01481	0.028	0.89009	0.80223-0.98756	0.271	0.89266	0.73230-1.08814	0.111	0.89769	0.78938-1.02085	-0.00091	0.96998	0.776	23.0061	28	0.73273	23.0047	27	0.68476
ebi-a-GCST90001932	22	0.139	1.32984	0.92585-1.9101	0.269	1.14074	0.90302-1.44105	0.029	1.19705	1.01843-1.40699	0.282	1.27961	0.82611-1.98205	0.445	1.15173	0.80680-1.64412	-0.02733	0.53033	0.352	22.7916	21	0.35519	22.3361	20	0.32255
ebi-a-GCST90001555	25	0.022	0.86255	0.76651-0.9706	0.018	0.84241	0.73071-0.97118	0.032	0.89799	0.81408-0.99055	0.858	1.02344	0.79631-1.31535	0.03	0.85133	0.74285-0.97566	0.03036	0.24171	0.554	22.4897	24	0.55007	21.0456	23	0.57831
ebi-a-GCST90001817	14	0.659	1.14352	0.64018-2.0426	0.569	0.8962	0.61475-1.30652	0.036	0.74761	0.57003-0.98050	0.786	0.92256	0.52104-1.63348	0.897	0.96931	0.61019-1.53979	-0.07628	0.13403	0.37	14.088	13	0.36768	11.5056	12	0.48616
ebi-a-GCST90001781	23	0.208	1.1435	0.93415-1.3998	0.349	1.10578	0.89612-1.36449	0.036	1.14647	1.00917-1.30246	0.437	1.14857	0.81512-1.61844	0.323	1.11184	0.90518-1.36568	0.00113	0.97441	0.951	12.801	22	0.93856	12.8	21	0.91547
ebi-a-GCST90001960	15	0.185	1.12605	0.95356-1.3297	0.14	1.14266	0.95713-1.36414	0.038	1.14614	1.00779-1.30349	0.326	1.16748	0.86633-1.57331	0.158	1.12698	0.96306-1.31880	0.01289	0.74737	0.776	10.9009	14	0.6938	10.7926	13	0.62819
ebi-a-GCST90001994	20	0.726	0.9746	0.84572-1.1231	0.077	0.87366	0.75230-1.01459	0.038	0.88038	0.78064-0.99287	0.206	0.85205	0.67048-1.08280	0.256	0.92613	0.81443-1.05314	-0.07404	0.04016	0.125	26.4633	19	0.11779	20.8086	18	0.28918
ebi-a-GCST90002094	15	0.126	1.17972	0.96757-1.4384	0.062	1.16198	0.99272-1.36010	0.039	1.12748	1.00613-1.26347	0.157	1.21485	0.94164-1.56733	0.11	1.1595	0.97834-1.37421	-0.02058	0.59362	0.691	11.3299	14	0.65995	11.0306	13	0.60825
ebi-a-GCST90001565	14	0.084	0.84266	0.70515-1.0070	0.15	0.86222	0.70475-1.05487	0.039	0.85667	0.73943-0.99249	0.251	0.82544	0.60384-1.12836	0.212	0.88495	0.73738-1.06206	0.00999	0.75319	0.96	5.09587	13	0.97302	4.99236	12	0.95823
ebi-a-GCST90001714	4	0.393	0.81061	0.55368-1.1868	0.135	0.7699	0.54628-1.08507	0.041	0.74515	0.56184-0.98827	0.365	0.73004	0.40911-1.30271	0.309	0.79951	0.55825-1.14505	-0.03158	0.58536	0.617	2.17275	3	0.53734	1.7575	2	0.4153
ebi-a-GCST90002005	22	0.306	1.13381	0.89702-1.4331	0.345	1.10067	0.90201-1.34307	0.042	1.16832	1.00560-1.35736	0.633	1.09457	0.75930-1.57788	0.437	1.08969	0.88127-1.34739	0.01121	0.74743	0.991	8.67599	21	0.99154	8.56938	20	0.98738
ebi-a-GCST90001646	25	0.043	1.11252	1.00902-1.2266	0.142	1.08267	0.97384-1.20367	0.042	1.08421	1.00282-1.17220	0.015	1.25659	1.05951-1.49032	0.072	1.08554	0.99658-1.18244	-0.02461	0.39832	0.581	23.1167	24	0.51292	22.376	23	0.49766
ebi-a-GCST90001829	19	0.133	0.88542	0.76113-1.0300	0.095	0.89381	0.78357-1.01956	0.043	0.89295	0.80009-0.99659	0.207	1.20604	0.91099-1.59665	0.118	0.89812	0.78990-1.02118	0.0055	0.8709	0.424	19.6451	18	0.35315	19.6137	17	0.29446
ebi-a-GCST90002106	20	0.075	0.87096	0.75451-1.0054	0.091	0.89641	0.78972-1.01751	0.044	0.91003	0.83013-0.99762	0.253	0.87404	0.69887-1.09311	0.08	0.89621	0.79807-1.00643	0.02619	0.44541	0.857	13.2695	19	0.8245	12.6608	18	0.81132
ebi-a-GCST90001751	25	0.089	0.83359	0.68209-1.0187	0.121	0.8439	0.68101-1.04575	0.045	0.87036	0.75996-0.99679	0.088	0.71463	0.49370-1.03443	0.085	0.8338	0.68370-1.01685	0.01563	0.57244	0.872	17.2857	24	0.83622	16.9578	23	0.81132
ebi-a-GCST90002115	20	0.168	1.29724	0.90921-1.8509	0.369	1.13139	0.86443-1.48079	0.047	1.21716	1.00217-1.47827	0.903	1.02948	0.65004-1.63039	0.872	1.03435	0.68885-1.55315	-0.01592	0.67968	0.906	11.6872	19	0.89856	11.511	18	0.87143
ebi-a-GCST90001919	22	0.351	1.08072	0.92150-1.2675	0.153	1.13972	0.95277-1.36334	0.048	1.12614	1.00090-1.26706	0.617	1.08082	0.80044-1.45941	0.213	1.12358	0.94039-1.34244	0.02511	0.46058	0.915	12.8848	21	0.91261	12.3187	20	0.90467
ebi-a-GCST90001435	18	0.101	0.89252	0.78531-1.0144	0.068	0.87622	0.76034-1.00976	0.051	0.89742	0.80513-1.00028	0.19	0.84388	0.66151-1.07654	0.078	0.89121	0.79014-1.00521	0.00416	0.87642	0.836	11.9433	17	0.80356	11.9184	16	0.74958
ebi-a-GCST90001552	36	0.071	1.08524	0.99575-1.1828	0.111	1.09348	0.97968-1.22050	0.054	1.07685	0.99873-1.16107	0.057	1.17059	1.00065-1.36938	0.14	1.07606	0.97836-1.18353	-0.00724	0.71724	0.901	24.791	35	0.90015	24.6576	34	0.87988
ebi-a-GCST90002001	15	0.159	0.85526	0.69679-1.0498	0.213	0.86746	0.69337-1.08526	0.054	0.85854	0.73506-1.00277	0.562	0.89484	0.62002-1.29146	0.179	0.87352	0.72430-1.05349	0.00182	0.95616	0.65	12.7434	14	0.54682	12.7403	13	0.46807
ebi-a-GCST90001778	25	0.288	0.91747	0.78567-1.0714	0.185	0.8936	0.75671-1.05525	0.056	0.89483	0.79827-1.00306	0.724	0.95368	0.73536-1.23682	0.128	0.88902	0.76800-1.02910	-0.0135	0.63842	0.39	26.91	24	0.30867	26.6472	23	0.27127
ebi-a-GCST90001575	36	0.117	1.15983	0.96787-1.3899	0.638	1.04753	0.86314-1.27132	0.058	1.12942	0.99599-1.28074	0.701	1.06663	0.76963-1.47824	0.221	1.14081	0.92733-1.40344	-0.00908	0.69151	0.854	26.6323	35	0.84416	26.4721	34	0.81807
ebi-a-GCST90001583	27	0.247	1.08704	0.94686-1.2480	0.307	1.09149	0.92280-1.29102	0.061	1.11344	0.99511-1.24583	0.457	1.10518	0.85227-1.43313	0.186	1.09692	0.95990-1.25350	0.01353	0.56301	0.677	23.6591	26	0.59545	23.3155	25	0.55915
ebi-a-GCST90001652	24	0.699	0.95112	0.73997-1.2225	0.67	1.05	0.83881-1.31436	0.062	1.16204	0.99263-1.36037	0.72	1.073	0.73382-1.56895	0.845	1.0243	0.80754-1.29924	0.05908	0.05697	0.728	18.9733	23	0.70277	14.9373	22	0.86492
ebi-a-GCST90001562	32	0.088	1.08589	0.99084-1.1901	0.039	1.12108	1.00565-1.24976	0.062	1.07845	0.99615-1.16755	0.011	1.28938	1.07264-1.54991	0.038	1.10269	1.00936-1.20465	-0.00884	0.75935	0.056	45.208	31	0.04776	45.0644	30	0.03807
ebi-a-GCST90001782	22	0.238	1.06142	0.96412-1.1685	0.224	1.06957	0.95977-1.19192	0.062	1.07576	0.99626-1.16160	0.231	1.11765	0.93672-1.33353	0.506	1.03725	0.93295-1.15322	0.01261	0.65452	0.458	19.7278	21	0.53856	19.5215	20	0.4882
ebi-a-GCST90002037	21	0.051	1.17899	1.00966-1.3767	0.079	1.15574	0.98353-1.35810	0.062	1.11692	0.99432-1.25464	0.25	1.15166	0.91165-1.45486	0.041	1.16501	1.01550-1.33654	-0.02765	0.31531	0.345	22.7921	20	0.29912	21.5837	19	0.30546
ebi-a-GCST90001704	20	0.103	0.88281	0.76588-1.0176	0.131	0.90376	0.79254-1.03058	0.063	0.9037	0.81209-1.00565	0.146	0.82303	0.63995-1.05848	0.175	0.90557	0.78889-1.03951	0.01479	0.62082	0.43	20.7359	19	0.35158	20.4481	18	0.30817
ebi-a-GCST90001498	18	0.389	0.85633	0.60752-1.2071	0.592	0.92738	0.70381-1.22198	0.065	0.82894	0.67902-1.01196	0.287	0.78731	0.51407-1.20578	0.833	0.96354	0.68558-1.35420	-0.00833	0.82243	0.828	11.2551	17	0.843	11.203	16	0.79678
ebi-a-GCST90001556	14	0.236	0.90894	0.78243-1.0559	0.208	0.90366	0.77184-1.05800	0.068	0.89498	0.79454-1.00812	0.803	0.97236	0.78385-1.20620	0.247	0.91366	0.78946-1.05739	-0.01108	0.74481	0.671	10.5337	13	0.64982	10.4228	12	0.57893
ebi-a-GCST90001488	18	0.421	0.90363	0.71040-1.1494	0.26	0.88412	0.71346-1.09560	0.069	0.86086	0.73264-1.01151	0.281	0.83586	0.60976-1.14580	0.249	0.87584	0.70454-1.08879	-0.0187	0.5953	0.453	18.3174	17	0.36909	17.9871	16	0.32465
ebi-a-GCST90001903	22	0.413	0.86931	0.62602-1.2071	0.261	0.85565	0.65192-1.12306	0.069	0.85011	0.71366-1.01265	0.318	0.79478	0.51202-1.23370	0.274	0.83662	0.61303-1.14177	-0.0063	0.87522	0.402	22.4849	21	0.37205	22.4565	20	0.31626
ebi-a-GCST90001510	21	0.015	0.82864	0.72204-0.9510	0.067	0.88965	0.78507-1.00817	0.07	0.90718	0.81647-1.00796	0.216	0.90508	0.77669-1.05470	0.052	0.88546	0.78903-0.99368	0.08905	0.07816	0.196	26.9021	20	0.13804	22.7511	19	0.24848
ebi-a-GCST90001675	26	0.14	1.13168	0.96534-1.3267	0.693	1.03769	0.86335-1.24723	0.07	1.11761	0.99096-1.26045	0.703	1.07171	0.75338-1.52454	0.521	1.05988	0.88968-1.26264	-0.00536	0.81554	0.856	16.2782	25	0.90629	16.2225	24	0.87988
ebi-a-GCST90001852	20	0.5	1.0656	0.88926-1.2769	0.378	1.08906	0.90097-1.31641	0.072	1.12234	0.98985-1.27256	0.271	1.19391	0.87904-1.62157	0.333	1.08691	0.92214-1.28113	0.02713	0.44488	0.672	15.4601	19	0.69294	14.8499	18	0.67224
ebi-a-GCST90001648	17	0.243	1.2204	0.88508-1.6828	0.317	1.12888	0.89034-1.43133	0.072	1.17962	0.98526-1.41232	0.382	1.18902	0.81501-1.73469	0.269	1.13229	0.91523-1.40084	-0.00976	0.80572	0.749	12.8354	16	0.68476	12.7727	15	0.61985
ebi-a-GCST90001834	24	0.155	1.22438	0.93522-1.6029	0.144	1.18347	0.94404-1.48362	0.072	1.14133	0.98815-1.31824	0.348	1.19158	0.83269-1.70516	0.131	1.19787	0.95581-1.50123	-0.02281	0.55148	0.629	20.8094	23	0.59272	20.4436	22	0.55531
ebi-a-GCST90001816	25	0.132	1.21472	0.95156-1.5506	0.201	1.16072	0.92377-1.45845	0.074	1.15568	0.98619-1.35430	0.925	1.02116	0.66237-1.57430	0.099	1.24879	0.96864-1.60998	-0.01606	0.5998	0.349	26.2776	24	0.33923	25.9581	23	0.30285
ebi-a-GCST90001534	16	0.245	0.92353	0.81217-1.0502	0.231	0.91435	0.78974-1.05861	0.076	0.90766	0.81556-1.01016	0.677	0.94911	0.74588-1.20771	0.187	0.90928	0.79461-1.04051	-0.01423	0.63443	0.479	14.4559	15	0.49127	14.216	14	0.43375
ebi-a-GCST90001442	24	0.577	1.03775	0.91271-1.1799	0.416	1.06684	0.91297-1.24664	0.076	1.10456	0.98955-1.23293	0.053	1.44723	1.01441-2.06472	0.769	1.02202	0.88515-1.18006	0.0419	0.09005	0.428	23.7065	23	0.4202	20.5624	22	0.5479
ebi-a-GCST90001784	23	0.732	1.02363	0.89734-1.1677	0.387	1.06807	0.92003-1.23993	0.077	1.10902	0.98882-1.24383	0.636	1.06754	0.81744-1.39417	0.284	1.08241	0.93978-1.24668	0.06157	0.05281	0.329	26.0532	22	0.2494	21.7005	21	0.41694
ebi-a-GCST90001621	32	0.47	0.90458	0.69169-1.1830	0.683	1.04585	0.84347-1.29679	0.077	0.87139	0.74799-1.01514	0.919	1.01993	0.70007-1.48592	0.656	1.07357	0.78791-1.46279	-0.01062	0.74037	0.261	36.4279	31	0.23074	36.2926	30	0.19865
ebi-a-GCST90001965	18	0.263	0.92469	0.81017-1.0554	0.225	0.92353	0.81209-1.05025	0.079	0.90723	0.81376-1.01145	0.793	0.94378	0.61693-1.44380	0.211	0.92398	0.82004-1.04109	-0.01508	0.60912	0.52	18.1914	17	0.37686	17.8873	16	0.33054
ebi-a-GCST90001504	21	0.558	0.94795	0.79520-1.1300	0.461	0.93877	0.79361-1.11047	0.083	0.89876	0.79663-1.01398	0.584	0.92384	0.69897-1.22106	0.327	0.92384	0.79150-1.07831	-0.04091	0.42043	0.381	22.5553	20	0.31115	21.778	19	0.29545
ebi-a-GCST90002068	27	0.578	0.94537	0.77776-1.1491	0.185	1.12571	0.94482-1.34124	0.083	1.12404	0.98467-1.28314	0.466	1.11439	0.83638-1.48482	0.313	1.11439	0.90646-1.37003	0.07157	0.03411	0.276	30.9319	26	0.23082	25.7553	25	0.42075
ebi-a-GCST90001811	16	0.774	0.94644	0.65417-1.3693	0.448	1.11714	0.83906-1.48738	0.086	1.20117	0.97467-1.48030	0.715	1.09028	0.69150-1.71904	0.756	1.06424	0.72399-1.56441	0.06242	0.14733	0.866	9.35039	15	0.8585	6.99744	14	0.93481
ebi-a-GCST90002025	22	0.189	1.09341	0.96121-1.2438	0.117	1.11713	0.97265-1.28307	0.089	1.08853	0.98723-1.20023	0.637	1.07171	0.80713-1.42300	0.128	1.10287	0.97718-1.24473	-0.00234	0.91799	0.813	15.6523	21	0.78886	15.6415	20	0.7386
ebi-a-GCST90001831	15	0.401	1.22805	0.77264-1.9519	0.852	1.02846	0.76635-1.38021	0.09	1.19609	0.97227-1.47143	0.923	0.97947	0.64959-1.47687	0.975	0.99376	0.67210-1.46937	-0.00611	0.90267	0.554	12.6653	14	0.55303	12.6497	13	0.47522
ebi-a-GCST90001910	17	0.733	1.03248	0.86233-1.2362	0.092	1.19126	0.97204-1.45991	0.092	1.12968	0.98013-1.30204	0.566	1.12571	0.75792-1.67197	0.145	1.20174	0.94983-1.52045	0.04422	0.1533	0.233	19.0878	16	0.26413	16.5861	15	0.3442
ebi-a-GCST90001818	16	0.974	1.01099	0.53404-1.9139	0.397	1.17833	0.80602-1.72259	0.093	1.3006	0.95745-1.76673	0.395	1.3027	0.72054-2.35521	0.585	1.16709	0.67845-2.00767	0.05013	0.39175	0.274	18.701	15	0.2276	17.7128	14	0.22018
ebi-a-GCST90001663	28	0.397	1.10241	0.88320-1.3760	0.147	1.16409	0.94812-1.42926	0.094	1.12666	0.97990-1.29541	0.721	1.07469	0.72721-1.58820	0.401	1.13581	0.84798-1.52135	0.0075	0.80638	0.633	24.2124	27	0.61851	24.1511	26	0.56732
ebi-a-GCST90001934	21	0.156	0.88519	0.75310-1.0404	0.393	0.92319	0.76848-1.10904	0.096	0.89847	0.79216-1.01905	0.838	0.96581	0.69426-1.34359	0.294	0.91666	0.78239-1.07398	0.00752	0.77631	0.791	15.563	20	0.74334	15.4799	19	0.69165
ebi-a-GCST90001814	14	0.165	0.94476	0.87616-1.0187	0.26	0.94415	0.85423-1.04353	0.098	0.94333	0.88042-1.01074	0.734	0.96994	0.81643-1.15231	0.184	0.94014	0.86238-1.02490	-0.00313	0.92371	0.77	8.39133	13	0.8172	8.38177	12	0.75463
ebi-a-GCST90001542	21	0.084	0.88454	0.77523-1.0093	0.105	0.88457	0.76258-1.02608	0.098	0.91595	0.82549-1.01631	0.205	0.85521	0.67679-1.08067	0.068	0.88485	0.78157-1.00177	0.03466	0.41012	0.5	19.504	20	0.48931	18.7946	19	0.47008
ebi-a-GCST90001809	19	0.293	1.37736	0.77287-2.4546	0.242	1.22674	0.87107-1.72763	0.101	1.25916	0.95605-1.65835	0.337	1.35327	0.74186-2.46857	0.319	1.31484	0.77902-2.21923	-0.01839	0.73148	0.115	26.3818	18	0.09134	26.1942	17	0.07099
ebi-a-GCST90001613	20	0.113	1.14783	0.97592-1.3500	0.38	1.08959	0.89971-1.31955	0.102	1.11188	0.97925-1.26247	0.958	1.009	0.72656-1.40124	0.224	1.10322	0.94662-1.28572	-0.01653	0.54445	0.826	13.7196	19	0.79978	13.338	18	0.77112
ebi-a-GCST90001719	20	0.157	0.88992	0.76223-1.0390	0.122	0.9025	0.79257-1.02768	0.105	0.91086	0.81360-1.01975	0.154	1.2396	0.93389-1.64540	0.153	0.90478	0.79312-1.03217	0.01528	0.66428	0.331	22.4524	19	0.26232	22.2121	18	0.2227
ebi-a-GCST90001402	14	0.442	1.1112	0.85662-1.4415	0.131	1.20319	0.94622-1.52995	0.106	1.15757	0.96958-1.38200	0.248	1.23713	0.87633-1.74649	0.254	1.16845	0.90486-1.50882	0.0141	0.68159	0.919	6.80834	13	0.91176	6.63157	12	0.88097
ebi-a-GCST90001716	21	0.152	0.88284	0.74947-1.0399	0.13	0.90117	0.78770-1.03100	0.107	0.90775	0.80687-1.02124	0.269	0.85402	0.65055-1.12114	0.147	0.90322	0.79130-1.03096	0.01759	0.62983	0.244	26.2446	20	0.15789	25.9172	19	0.13251
ebi-a-GCST90001429	25	0.992	1.00223	0.66587-1.5085	0.307	1.15521	0.87568-1.52397	0.108	1.17142	0.96593-1.42063	0.829	1.05528	0.65103-1.71055	0.56	1.13119	0.75132-1.70311	0.03363	0.40516	0.894	16.2066	24	0.88048	15.4874	23	0.87632
ebi-a-GCST90001405	23	0.365	0.93675	0.81570-1.0758	0.086	0.87285	0.74732-1.01947	0.109	0.91009	0.81113-1.02112	0.012	0.69531	0.53564-0.90258	0.097	0.88866	0.77760-1.01558	-0.01894	0.46924	0.694	19.0946	22	0.63948	18.5513	21	0.6139
ebi-a-GCST90001481	29	0.164	1.08179	0.97128-1.2049	0.036	1.13356	1.00847-1.27416	0.109	1.07163	0.98469-1.16626	0.567	0.94334	0.77427-1.14934	0.034	1.12837	1.01476-1.25469	-0.00913	0.77794	0.319	30.9318	28	0.32012	30.8392	27	0.27779
ebi-a-GCST90001674	16	0.043	1.30827	1.03205-1.6584	0.106	1.2158	0.95963-1.54036	0.109	1.14474	0.97022-1.35066	0.507	0.86249	0.56287-1.32160	0.077	1.28251	0.99184-1.65837	-0.05287	0.14587	0.711	9.68013	15	0.83936	7.30869	14	0.92216
ebi-a-GCST90002100	22	0.543	1.10054	0.81242-1.4909	0.36	1.11422	0.88393-1.40452	0.109	1.14544	0.96997-1.35266	0.786	0.94753	0.64512-1.39171	0.947	0.989	0.71834-1.36165	0.01216	0.7608	0.965	11.0257	21	0.96229	10.9304	20	0.94801
ebi-a-GCST90001776	17	0.57	0.93309	0.73854-1.1789	0.246	0.87508	0.69840-1.09646	0.117	0.87503	0.74034-1.03423	0.508	0.88408	0.61872-1.26326	0.38	0.90543	0.72966-1.12354	-0.0259	0.45319	0.874	10.3518	16	0.84762	9.75867	15	0.83464
ebi-a-GCST90001553	28	0.103	1.13339	0.97999-1.3108	0.381	1.08208	0.90702-1.29093	0.122	1.10377	0.97398-1.25086	0.076	1.31915	0.98241-1.77133	0.22	1.09912	0.94840-1.27378	-0.01476	0.49026	0.935	17.442	27	0.91965	16.9523	26	0.91052
ebi-a-GCST90001907	24	0.284	0.9332	0.82489-1.0557	0.157	0.90891	0.79643-1.03728	0.123	0.92676	0.84134-1.02084	0.856	0.96955	0.69756-1.34760	0.159	0.9153	0.81242-1.03120	-0.00477	0.85704	0.503	22.8051	23	0.4722	22.7707	22	0.41477
ebi-a-GCST90002113	19	0.482	1.0777	0.87869-1.3218	0.268	1.1256	0.91294-1.38779	0.123	1.11772	0.97025-1.28760	0.644	1.07868	0.78633-1.47974	0.328	1.11311	0.90344-1.37144	0.01397	0.63349	0.813	13.5267	18	0.75938	13.2909	17	0.7165
ebi-a-GCST90001774	20	0.069	1.29877	0.99622-1.6932	0.139	1.2031	0.94157-1.53727	0.124	1.14332	0.96412-1.35583	0.538	1.13046	0.77057-1.65843	0.143	1.2214	0.94518-1.57836	-0.05088	0.23456	0.7	15.8625	19	0.66643	14.3498	18	0.70602
ebi-a-GCST90001397	31	0.127	1.16026	0.96364-1.3970	0.255	1.12882	0.91639-1.39050	0.124	1.10692	0.97240-1.26005	0.438	1.14989	0.81200-1.62837	0.101	1.18434	0.97358-1.44074	-0.01761	0.49348	0.868	21.8619	30	0.85902	21.3809	29	0.8449
ebi-a-GCST90001530	17	0.076	0.71857	0.51135-1.0098	0.115	0.86329	0.71920-1.03624	0.125	0.89377	0.77423-1.03177	0.487	0.90049	0.67448-1.20223	0.174	0.86008	0.69877-1.05863	0.0654	0.18588	0.99	6.66007	16	0.97927	4.73788	15	0.99412
ebi-a-GCST90001592	23	0.181	0.90547	0.78671-1.0422	0.138	0.89313	0.76911-1.03714	0.125	0.9173	0.82143-1.02435	0.502	0.91209	0.70029-1.18795	0.094	0.88666	0.77485-1.01461	0.00655	0.77292	0.574	21.1074	22	0.51411	21.0219	21	0.45761
ebi-a-GCST90001753	29	0.156	1.13491	0.95744-1.3453	0.105	1.16021	0.96925-1.38879	0.129	1.10159	0.97226-1.24813	0.225	1.22209	0.89010-1.67789	0.134	1.12879	0.96764-1.31677	-0.01307	0.61126	0.205	34.0846	28	0.1981	33.7539	27	0.17332
ebi-a-GCST90002120	17	0.351	0.69386	0.32941-1.4615	0.069	0.74461	0.54183-1.02328	0.131	0.83774	0.66562-1.05438	0.8	1.08742	0.57445-2.05847	0.118	0.65628	0.39820-1.08164	0.04047	0.6089	0.335	18.0336	16	0.32193	17.7112	15	0.27815
ebi-a-GCST90001551	24	0.288	1.0939	0.93085-1.2855	0.404	1.08344	0.89747-1.30795	0.135	1.11039	0.96776-1.27405	0.262	1.22851	0.86487-1.74503	0.246	1.09928	0.94078-1.28447	0.00839	0.73204	0.839	17.3598	23	0.79123	17.2395	22	0.75001
ebi-a-GCST90001779	24	0.31	1.05263	0.95565-1.1595	0.206	1.07467	0.96112-1.20162	0.138	1.06365	0.98026-1.15412	0.396	1.09257	0.89401-1.33524	0.329	1.05165	0.95257-1.16104	0.01139	0.69704	0.656	19.8813	23	0.64906	19.7257	22	0.60019
ebi-a-GCST90002073	21	0.117	1.20866	0.96395-1.5155	0.476	1.06446	0.89641-1.26401	0.139	1.1134	0.96583-1.28350	0.998	1.0004	0.68179-1.46790	0.512	1.06137	0.89125-1.26396	-0.03896	0.37072	0.203	25.8217	20	0.17178	24.7277	19	0.1697
ebi-a-GCST90001750	19	0.745	0.91849	0.55518-1.5195	0.398	1.11205	0.86909-1.42294	0.141	1.13739	0.95819-1.35010	0.282	1.2395	0.84838-1.81094	0.268	1.24518	0.85477-1.81391	0.05181	0.38843	0.746	14.2487	18	0.71274	13.4652	17	0.70453
ebi-a-GCST90001851	30	0.319	1.09354	0.92020-1.2995	0.572	0.9527	0.80516-1.12728	0.143	0.91315	0.80867-1.03114	0.815	0.96761	0.73567-1.27268	0.802	0.98034	0.84031-1.14371	-0.07119	0.01209	0.244	34.3881	29	0.22534	27.1857	28	0.50815
ebi-a-GCST90001623	32	0.39	1.12511	0.86352-1.4660	0.206	1.15005	0.92611-1.42814	0.143	1.12068	0.96210-1.30540	0.77	1.06692	0.69423-1.63969	0.23	1.2754	0.86407-1.88251	-0.00107	0.97144	0.257	34.4155	31	0.30754	34.414	30	0.26458
ebi-a-GCST90001708	25	0.961	1.00341	0.87780-1.1470	0.283	0.93088	0.81670-1.06103	0.143	0.93037	0.84463-1.02482	0.359	1.14	0.86644-1.49992	0.359	0.93689	0.81735-1.07391	-0.0488	0.12258	0.528	23.0705	24	0.51564	20.5008	23	0.61154
ebi-a-GCST90001616	17	0.678	1.06864	0.78561-1.4536	0.714	1.04218	0.83553-1.29992	0.145	1.19131	0.94147-1.50744	0.122	1.73327	0.89600-3.35292	0.69	1.042	0.85411-1.27121	0.04534	0.3023	0.049	31.8233	16	0.01054	29.5734	15	0.01356
ebi-a-GCST90001720	23	0.797	1.01932	0.88251-1.1773	0.412	0.94137	0.81488-1.08750	0.146	0.92165	0.82570-1.02875	0.453	1.10834	0.85150-1.44264	0.42	0.94943	0.83899-1.07440	-0.05978	0.054	0.465	23.294	22	0.38529	19.1275	21	0.57696
ebi-a-GCST90001798	29	0.003	1.36932	1.13492-1.6521	0.103	1.14106	0.97354-1.33741	0.146	1.09268	0.96965-1.23132	0.331	1.12642	0.88979-1.42596	0.081	1.1527	0.98814-1.34466	-0.10372	0.00631	0.359	30.8505	28	0.32376	22.077	27	0.73345
ebi-a-GCST90001928	17	0.983	1.00199	0.83324-1.2049	0.963	1.00471	0.82581-1.22235	0.148	1.11123	0.96326-1.28193	0.717	1.05744	0.78597-1.42268	0.939	1.00757	0.83327-1.21833	0.06511	0.12413	0.368	17.8729	16	0.33139	15.1863	15	0.43808
ebi-a-GCST90001799	20	0.333	0.91571	0.76994-1.0891	0.134	0.86392	0.71352-1.04604	0.149	0.914	0.80903-1.03259	0.746	0.95022	0.70049-1.28897	0.144	0.87015	0.72755-1.04071	-0.0011	0.97659	0.614	16.5254	19	0.62198	16.5246	18	0.55599
ebi-a-GCST90001467	29	0.664	0.94082	0.71654-1.2353	0.307	1.12811	0.89535-1.42136	0.15	1.12521	0.95837-1.32109	0.617	1.10391	0.75256-1.61929	0.456	1.13511	0.81736-1.57639	0.04848	0.12245	0.513	26.1907	28	0.56256	23.648	27	0.64976
ebi-a-GCST90001477	23	0.13	0.87793	0.74666-1.0323	0.584	0.95495	0.80955-1.12646	0.15	0.91425	0.80921-1.03292	0.286	1.15773	0.89033-1.50543	0.229	0.91141	0.78681-1.05574	0.02554	0.45801	0.331	25.2485	22	0.28534	24.5795	21	0.26584
ebi-a-GCST90001846	16	0.854	0.96642	0.67660-1.3804	0.177	1.18206	0.92729-1.50683	0.155	1.13509	0.95336-1.35146	0.4	1.19139	0.80192-1.77001	0.208	1.17801	0.92297-1.50353	0.04949	0.32773	0.685	12.3259	15	0.65422	11.2974	14	0.66253
ebi-a-GCST90001826	17	0.629	0.92492	0.67810-1.2616	0.463	0.90358	0.68931-1.18446	0.161	0.87283	0.72182-1.05544	0.58	0.89441	0.60697-1.31798	0.546	0.90962	0.67338-1.22874	-0.01771	0.65014	0.896	9.72271	16	0.8807	9.50851	15	0.84947
ebi-a-GCST90001396	18	0.295	0.64425	0.29078-1.4274	0.519	1.13014	0.77955-1.63840	0.161	0.80159	0.58818-1.09242	0.635	1.15543	0.64343-2.07483	0.564	1.1861	0.67204-2.09337	0.04398	0.5657	0.03	29.5288	17	0.02995	28.9072	16	0.02457
ebi-a-GCST90001916	13	0.13	1.60379	0.91038-2.8254	0.183	1.25629	0.89795-1.75762	0.165	1.18222	0.93325-1.49761	0.11	1.6371	0.93470-2.86732	0.079	1.6371	0.98944-2.70867	-0.06108	0.26992	0.659	9.78339	12	0.63496	8.43368	11	0.67401
ebi-a-GCST90001643	28	0.046	0.90487	0.82413-0.9935	0.167	0.9304	0.83982-1.03075	0.166	0.94728	0.87743-1.02269	0.455	0.9305	0.77227-1.12114	0.132	0.9305	0.84957-1.01913	0.04189	0.10578	0.795	21.944	27	0.74022	19.136	26	0.83064
ebi-a-GCST90001756	15	0.127	1.10879	0.97918-1.2556	0.271	1.08417	0.93877-1.25209	0.166	1.07834	0.96920-1.19978	0.872	1.01951	0.80961-1.28384	0.293	1.07171	0.94639-1.21361	-0.02551	0.40757	0.803	10.3398	14	0.73695	9.60724	13	0.72569
ebi-a-GCST90001691	27	0.222	0.94969	0.87602-1.0296	0.811	1.01357	0.90762-1.13188	0.166	0.95082	0.88531-1.02118	0.728	0.96706	0.80239-1.16553	0.386	0.96253	0.88411-1.04789	0.00134	0.95136	0.899	16.2719	26	0.92944	16.2681	25	0.90661
ebi-a-GCST90001902	18	0.295	0.87921	0.69648-1.1099	0.526	0.92911	0.74027-1.16613	0.168	0.89413	0.76276-1.04813	0.805	0.9586	0.68901-1.33366	0.518	0.9279	0.74322-1.15846	0.00582	0.84895	0.64	14.8548	17	0.60594	14.8173	16	0.53806
ebi-a-GCST90001703	17	0.167	0.89311	0.76666-1.0404	0.221	0.92157	0.80849-1.05046	0.17	0.92643	0.83063-1.03328	0.677	0.94363	0.72206-1.23319	0.197	0.91325	0.80026-1.04219	0.02729	0.50385	0.427	18.1004	16	0.31805	17.5515	15	0.28698
ebi-a-GCST90001622	32	0.764	1.04192	0.79847-1.3596	0.222	1.1464	0.92072-1.42741	0.171	1.11608	0.95361-1.30624	0.856	1.03868	0.69217-1.55865	0.204	1.2483	0.89329-1.74438	0.02002	0.53268	0.178	38.0587	31	0.17891	37.5599	30	0.16138
ebi-a-GCST90001705	22	0.107	0.88874	0.77509-1.0191	0.148	0.90362	0.78782-1.03645	0.172	0.92932	0.83657-1.03237	0.239	0.83023	0.61435-1.12197	0.107	0.89905	0.79427-1.01765	0.02665	0.3294	0.609	20.2487	21	0.50556	19.2493	20	0.50568
ebi-a-GCST90001558	22	0.513	1.07803	0.86408-1.3450	0.391	1.09625	0.88856-1.35247	0.175	1.1063	0.95613-1.28006	0.692	1.07355	0.75961-1.51723	0.282	1.12015	0.91594-1.36989	0.01122	0.7594	0.39	22.8322	21	0.35299	22.7227	20	0.30262
ebi-a-GCST90002034	20	0.153	0.93503	0.85615-1.0212	0.116	0.92658	0.84252-1.01903	0.176	0.9501	0.88218-1.02325	0.797	1.02408	0.85640-1.22459	0.099	0.93063	0.85803-1.00937	0.02269	0.50352	0.297	23.3736	19	0.22129	22.7837	18	0.19904
ebi-a-GCST90001823	16	0.583	0.84798	0.47724-1.5068	0.379	1.14043	0.85073-1.52878	0.177	1.15002	0.93884-1.40870	0.595	1.13529	0.71815-1.79473	0.487	1.15174	0.78100-1.69845	0.07604	0.2856	0.835	9.93151	15	0.82403	8.69886	14	0.84984
ebi-a-GCST90001576	15	0.175	1.3894	0.88665-2.1772	0.085	1.32044	0.96272-1.81109	0.177	1.1815	0.92737-1.50526	0.402	1.22645	0.77180-1.94892	0.198	1.31369	0.88427-1.95166	-0.03774	0.41619	0.929	7.0242	14	0.93378	6.3189	13	0.93377
ebi-a-GCST90001715	17	0.26	0.91569	0.79004-1.0613	0.241	0.92208	0.80508-1.05608	0.181	0.92919	0.83438-1.03477	0.661	0.9333	0.68967-1.26299	0.257	0.9224	0.80609-1.05550	0.01099	0.77333	0.526	15.9159	16	0.45885	15.8251	15	0.39377
ebi-a-GCST90001772	23	0.39	1.05174	0.93966-1.1772	0.337	1.06244	0.93891-1.20223	0.182	1.06499	0.97089-1.16821	0.43	1.08901	0.88475-1.34042	0.418	1.04778	0.93783-1.17062	0.0098	0.70672	0.817	16.5168	22	0.78944	16.3713	21	0.74844
ebi-a-GCST90001411	20	0.441	1.2382	0.72798-2.1060	0.193	1.26289	0.88843-1.79518	0.183	1.19467	0.91952-1.55215	0.93	1.03101	0.52805-2.01304	0.087	1.49536	0.96592-2.31500	-0.00813	0.88001	0.091	26.3989	19	0.11945	26.3646	18	0.09171
ebi-a-GCST90002004	25	0.2	1.15183	0.93372-1.4209	0.957	0.99505	0.83028-1.19254	0.185	1.11199	0.95032-1.30117	0.33	1.2064	0.83323-1.74671	0.839	0.98256	0.83093-1.16186	-0.01771	0.61772	0.006	46.1385	24	0.00426	45.6307	23	0.00332
ebi-a-GCST90002010	16	0.821	1.02293	0.84325-1.2409	0.118	1.13292	0.96889-1.32471	0.187	1.08364	0.96186-1.22084	0.542	1.0694	0.86640-1.31995	0.155	1.12277	0.96493-1.30643	0.03109	0.46953	0.63	13.2649	15	0.58184	12.7123	14	0.54929
ebi-a-GCST90001701	16	0.1	0.83578	0.68463-1.0203	0.199	0.88245	0.72919-1.06792	0.188	0.9047	0.77936-1.05020	0.308	0.84607	0.62042-1.15378	0.14	0.88117	0.75144-1.03331	0.05857	0.2669	0.354	18.8749	15	0.21946	17.2294	14	0.24416
ebi-a-GCST90001797	19	0.479	1.0796	0.87748-1.3283	0.366	1.11609	0.87946-1.41639	0.19	1.11096	0.94932-1.30014	0.828	1.0476	0.69316-1.58327	0.659	1.05312	0.84033-1.31978	0.01106	0.68297	0.707	14.2506	18	0.71262	14.0779	17	0.66158
ebi-a-GCST90001724	32	0.295	0.9138	0.77430-1.0784	0.078	0.84792	0.70562-1.01893	0.191	0.92169	0.81569-1.04147	0.313	0.83686	0.59552-1.17602	0.145	0.85772	0.70123-1.04914	0.00404	0.88118	0.718	25.8484	31	0.72856	25.8256	30	0.684
ebi-a-GCST90001777	26	0.261	0.93874	0.84292-1.0455	0.337	0.94681	0.84681-1.05861	0.193	0.94321	0.86379-1.02993	0.854	1.02649	0.77977-1.35127	0.337	0.95269	0.86455-1.04980	0.00369	0.87695	0.316	30.2571	25	0.21481	30.2262	24	0.17737
ebi-a-GCST90002045	15	0.831	0.95408	0.62517-1.4560	0.215	0.85113	0.65956-1.09834	0.194	0.88343	0.73266-1.06523	0.523	0.88422	0.61179-1.27796	0.229	0.81178	0.58653-1.12355	-0.02589	0.69721	0.608	12.2354	14	0.58741	12.0771	13	0.52133
ebi-a-GCST90001614	14	0.49	1.68657	0.40081-7.0970	0.073	1.47536	0.96449-2.25684	0.194	1.32912	0.86479-2.04275	0.169	1.76995	0.82069-3.81715	0.124	1.67848	0.90528-3.11207	-0.0433	0.7385	0.002	33.0686	13	0.00166	32.75	12	0.00106
ebi-a-GCST90001459	25	0.944	0.99088	0.77075-1.2739	0.38	0.90856	0.73332-1.12567	0.195	0.90396	0.77606-1.05294	0.469	0.87182	0.60503-1.25626	0.412	0.91275	0.73652-1.13116	-0.02883	0.37559	0.492	24.8336	24	0.41485	23.9823	23	0.40479
ebi-a-GCST90001845	27	0.429	1.0804	0.89476-1.3046	0.49	0.93781	0.78152-1.12536	0.195	0.92354	0.81892-1.04153	0.821	1.03913	0.74822-1.44313	0.919	1.00813	0.86439-1.17577	-0.06075	0.04437	0.637	22.0801	26	0.68431	17.5975	25	0.85899
ebi-a-GCST90001878	22	0.751	0.98027	0.86833-1.1066	0.546	0.96788	0.87065-1.07598	0.197	0.94997	0.87876-1.02695	0.861	0.98082	0.79163-1.21522	0.545	0.96823	0.87364-1.07307	-0.01931	0.51534	0.993	8.78663	21	0.9908	8.348	20	0.9893
ebi-a-GCST90001723	29	0.154	1.13867	0.95747-1.3542	0.337	1.10602	0.90043-1.35856	0.198	1.08604	0.95769-1.23160	0.953	1.01017	0.72322-1.41096	0.255	1.10594	0.93330-1.31052	-0.02029	0.44348	0.884	20.5626	28	0.8431	19.9577	27	0.83253
ebi-a-GCST90001574	25	0.207	0.87348	0.71215-1.0713	0.458	0.9313	0.77160-1.12406	0.199	0.91436	0.79751-1.04833	0.43	0.88737	0.66296-1.18773	0.524	0.92347	0.72552-1.17543	0.01703	0.56015	0.995	9.79044	24	0.99536	9.44092	23	0.99424
ebi-a-GCST90001755	27	0.818	0.94829	0.60659-1.4825	0.18	1.19882	0.91969-1.56266	0.2	1.13641	0.93471-1.38164	0.252	1.40643	0.79536-2.48699	0.208	1.37696	0.84750-2.23721	0.03654	0.3853	0.258	29.5935	26	0.28479	28.6971	25	0.27677
ebi-a-GCST90001844	26	0.824	1.02623	0.81929-1.2854	0.067	1.1969	0.98743-1.45081	0.2	1.09951	0.95113-1.27104	0.123	1.30671	0.94119-1.81419	0.061	1.24401	0.99993-1.54766	0.02422	0.43799	0.174	32.0316	25	0.1571	31.2223	24	0.14748
ebi-a-GCST90001963	19	0.171	0.92436	0.82986-1.0296	0.233	0.92927	0.82378-1.04827	0.2	0.94396	0.86429-1.03098	0.595	0.94204	0.75889-1.16938	0.219	0.93096	0.83387-1.03935	0.01714	0.51676	0.957	9.61189	18	0.94384	9.17347	17	0.93466
ebi-a-GCST90001870	14	0.343	0.93052	0.80652-1.0736	0.304	0.93063	0.81140-1.06738	0.204	0.93908	0.85228-1.03473	0.816	1.02764	0.82078-1.28663	0.313	0.93559	0.82618-1.05948	0.00582	0.86712	0.823	9.27244	13	0.75207	9.24322	12	0.68203
ebi-a-GCST90002076	21	0.723	0.9465	0.70160-1.2769	0.183	0.84364	0.65676-1.08369	0.205	0.89781	0.75987-1.06080	0.412	0.81059	0.49592-1.32490	0.235	0.78723	0.53678-1.15453	-0.01548	0.67893	0.304	21.96	20	0.34269	21.7576	19	0.29648
ebi-a-GCST90001883	24	0.614	0.94986	0.77994-1.1568	0.651	0.95682	0.79041-1.15826	0.206	0.91593	0.79934-1.04951	0.394	0.88234	0.66534-1.17012	0.71	0.9591	0.77186-1.19176	-0.01627	0.62187	0.991	9.90719	23	0.99184	9.65694	22	0.98916
ebi-a-GCST90001975	18	0.159	1.21293	0.93885-1.5670	0.728	1.04346	0.82095-1.32628	0.206	1.13465	0.93277-1.38021	0.95	0.98673	0.65367-1.48948	0.921	1.01611	0.74330-1.38905	-0.02834	0.43282	0.026	29.1395	17	0.03326	28.0063	16	0.03157
ebi-a-GCST90001645	22	0.333	1.15472	0.86929-1.5339	0.138	1.20474	0.94183-1.54104	0.211	1.11468	0.94025-1.32147	0.659	1.10411	0.71514-1.70466	0.258	1.17688	0.89445-1.54849	-0.00929	0.76402	0.638	17.9526	21	0.652	17.86	20	0.59663
ebi-a-GCST90001718	18	0.75	0.97676	0.84738-1.1259	0.383	0.94157	0.82235-1.07806	0.211	0.93647	0.84487-1.03800	0.444	1.11553	0.84846-1.46668	0.393	0.94441	0.83100-1.07330	-0.03276	0.41172	0.619	15.4123	17	0.56581	14.7019	16	0.54657
ebi-a-GCST90001571	23	0.574	0.93733	0.75083-1.1702	0.381	0.90565	0.72547-1.13059	0.213	0.9101	0.78457-1.05571	0.761	0.95194	0.69581-1.30237	0.356	0.90532	0.73612-1.11342	-0.0111	0.72951	0.824	16.6205	22	0.78394	16.4977	21	0.74107
ebi-a-GCST90001692	28	0.334	0.96289	0.89311-1.0381	0.745	0.98359	0.89011-1.08689	0.215	0.95915	0.89801-1.02446	0.265	0.91998	0.79682-1.06218	0.34	0.96285	0.89206-1.03926	-0.00445	0.83537	0.777	20.7396	27	0.79833	20.6955	26	0.75751
ebi-a-GCST90001580	17	0.211	1.17053	0.92437-1.4822	0.369	1.10024	0.89322-1.35523	0.215	1.10713	0.94265-1.30031	0.394	1.1448	0.84600-1.54913	0.287	1.11968	0.91558-1.36929	-0.02575	0.53726	0.713	13.7727	16	0.61564	13.374	15	0.57343
ebi-a-GCST90002027	27	0.032	0.72066	0.54307-0.9563	0.569	0.94169	0.76589-1.15785	0.217	0.91569	0.79621-1.05308	0.973	0.99399	0.70260-1.40623	0.707	0.95351	0.74622-1.21838	0.06959	0.06786	0.59	24.4574	26	0.54983	20.8148	25	0.70289
ebi-a-GCST90001771	30	0.661	1.04104	0.87125-1.2439	0.83	1.01829	0.86327-1.20116	0.219	1.08375	0.95336-1.23197	0.933	1.01302	0.75247-1.36378	0.887	0.98681	0.82355-1.18244	0.01918	0.52418	0.121	38.1137	29	0.11983	37.5557	28	0.1071
ebi-a-GCST90002007	19	0.913	1.00564	0.91048-1.1107	0.326	1.05218	0.95059-1.16463	0.219	1.05231	0.97008-1.14152	0.394	1.09872	0.88944-1.35723	0.414	1.04175	0.94657-1.14649	0.04635	0.15994	0.444	19.7327	18	0.34807	17.5085	17	0.42046
ebi-a-GCST90001706	28	0.673	0.96368	0.81302-1.1423	0.334	0.93605	0.81850-1.07048	0.221	0.93316	0.83529-1.04250	0.5	0.90794	0.68842-1.19745	0.217	0.92388	0.81724-1.04444	-0.0176	0.62511	0.184	35.4426	27	0.12801	35.1124	26	0.10924
ebi-a-GCST90002104	17	0.145	0.88211	0.75170-1.0351	0.116	0.9043	0.79764-1.02522	0.224	0.94095	0.85309-1.03787	0.623	1.05699	0.85096-1.31290	0.142	0.90308	0.79336-1.02798	0.04188	0.3326	0.618	14.4577	16	0.56465	13.4553	15	0.56718
ebi-a-GCST90002051	18	0.313	0.8283	0.58116-1.1805	0.253	0.88755	0.72343-1.08890	0.224	0.913	0.78849-1.05718	0.487	0.89316	0.65422-1.21938	0.49	0.90371	0.68209-1.19734	0.03229	0.56241	0.863	11.2146	17	0.8452	10.8646	16	0.81776
ebi-a-GCST90001789	23	0.179	0.82495	0.62900-1.0820	0.159	0.84991	0.67789-1.06559	0.224	0.90029	0.76004-1.06643	0.441	0.85868	0.58665-1.25685	0.121	0.79492	0.60153-1.05047	0.02895	0.42549	0.178	27.4872	22	0.1933	26.6489	21	0.18278
ebi-a-GCST90001569	19	0.641	0.92296	0.66270-1.2854	0.947	0.98926	0.72047-1.35833	0.224	0.88156	0.71932-1.08040	0.69	0.90137	0.54539-1.48970	0.902	0.97829	0.69426-1.37852	-0.01248	0.73504	0.865	11.6181	18	0.86632	11.4997	17	0.82944
ebi-a-GCST90001939	17	0.834	0.94313	0.55118-1.6138	0.938	1.0127	0.73633-1.39280	0.226	0.83673	0.62713-1.11636	0.909	1.03534	0.57482-1.86479	0.595	1.09878	0.78188-1.54413	-0.03455	0.60875	0.04	28.0356	16	0.03131	27.5339	15	0.02468
ebi-a-GCST90001867	29	0.848	0.97546	0.75902-1.2536	0.371	0.89709	0.70726-1.13787	0.226	0.90726	0.77504-1.06204	0.521	0.87061	0.57309-1.32259	0.309	0.88835	0.71004-1.11144	-0.02386	0.47075	0.209	35.2833	28	0.16177	34.5976	27	0.14936
ebi-a-GCST90001795	21	0.323	0.85942	0.64139-1.1516	0.359	0.87673	0.66179-1.16148	0.226	0.89212	0.74151-1.07332	0.535	1.19238	0.69071-2.05841	0.699	1.08431	0.72398-1.62398	0.01197	0.74658	0.359	21.8128	20	0.35076	21.69	19	0.29995
ebi-a-GCST90001748	23	0.242	1.14708	0.91758-1.4340	0.48	1.0865	0.86292-1.36802	0.239	1.09292	0.94275-1.26701	0.909	1.02554	0.67005-1.56963	0.447	1.08507	0.88261-1.33398	-0.01742	0.57225	0.52	22.751	22	0.4159	22.3999	21	0.37679
ebi-a-GCST90001699	34	0.24	1.00264	0.99832-1.0070	0.115	1.00453	0.99891-1.01018	0.243	1.00225	0.99848-1.00604	0.711	0.99822	0.98891-1.00761	0.143	1.00337	0.99897-1.00779	-0.00959	0.70759	0.382	34.5026	33	0.39585	34.3489	32	0.35581
ebi-a-GCST90001612	17	0.229	0.87107	0.70194-1.0809	0.342	0.88742	0.69356-1.13547	0.243	0.90964	0.77581-1.06656	0.386	1.22513	0.78405-1.91435	0.285	0.88032	0.70246-1.10322	0.02191	0.56902	0.74	12.3446	16	0.71994	12.0055	15	0.67861
ebi-a-GCST90001673	16	0.013	1.47353	1.12838-1.9242	0.152	1.2312	0.92600-1.63700	0.244	1.11515	0.92848-1.33937	0.77	1.08159	0.64512-1.81337	0.098	1.30096	0.97163-1.74192	-0.0956	0.01378	0.541	11.0158	15	0.75147	3.0938	14	0.9989
ebi-a-GCST90001856	26	0.863	0.97775	0.75912-1.2593	0.242	1.12613	0.92300-1.37397	0.244	1.08923	0.94340-1.25760	0.557	1.11627	0.77696-1.60378	0.416	1.0795	0.90069-1.29381	0.03953	0.31997	0.209	30.9233	25	0.19157	29.6492	24	0.19665
ebi-a-GCST90001767	22	0.663	1.05663	0.82804-1.3483	0.775	1.02569	0.86181-1.22073	0.245	0.9289	0.82036-1.05180	0.153	0.80312	0.60087-1.07344	0.914	1.0113	0.82719-1.23638	-0.05561	0.24266	0.62	18.5643	21	0.61307	17.1147	20	0.64551
ebi-a-GCST90001550	22	0.645	1.08691	0.76696-1.5403	0.726	0.94441	0.68619-1.29979	0.247	0.88691	0.72379-1.08679	0.337	0.76562	0.44960-1.30375	0.799	0.95631	0.68085-1.34321	-0.05131	0.17481	0.678	17.5156	21	0.67942	15.5362	20	0.74495
ebi-a-GCST90001835	18	0.301	0.81905	0.56795-1.1812	0.05	0.76819	0.58992-1.00033	0.248	0.87868	0.70541-1.09450	0.202	0.73671	0.46904-1.15713	0.086	0.78179	0.59973-1.01913	0.02058	0.64008	0.164	23.5833	17	0.13121	23.2531	16	0.10713
ebi-a-GCST90001709	22	0.348	0.94418	0.83977-1.0616	0.24	0.92558	0.81349-1.05311	0.256	0.94838	0.86556-1.03913	0.425	1.10291	0.87102-1.39652	0.357	0.94169	0.83096-1.06717	0.00333	0.90679	0.656	17.949	21	0.65223	17.9349	20	0.59169
ebi-a-GCST90002019	24	0.63	0.95769	0.80523-1.1390	0.467	0.94912	0.82462-1.09241	0.257	0.93423	0.83052-1.05089	0.869	0.97997	0.77297-1.24240	0.519	0.95664	0.83779-1.09236	-0.01445	0.70165	0.078	35.2086	23	0.04959	34.9692	22	0.03903
ebi-a-GCST90002017	22	0.977	0.99427	0.67714-1.4599	0.194	1.1619	0.92657-1.45699	0.258	1.10684	0.92838-1.31961	0.353	1.20348	0.82138-1.76335	0.229	1.21521	0.89303-1.65363	0.03438	0.54352	0.157	27.2703	21	0.16208	26.7592	20	0.14218
ebi-a-GCST90001997	25	0.75	1.05196	0.77362-1.4305	0.2	0.87723	0.71787-1.07197	0.258	0.91502	0.78453-1.06720	0.43	0.85	0.57137-1.26451	0.178	0.83863	0.65392-1.07551	-0.04264	0.31506	0.203	30.2427	24	0.17684	28.9164	23	0.1831
ebi-a-GCST90001849	25	0.678	1.06549	0.79262-1.4323	0.618	0.94824	0.76939-1.16867	0.259	0.92014	0.79622-1.06335	0.627	0.90446	0.60622-1.34943	0.575	1.07061	0.84622-1.35452	-0.03947	0.27683	0.635	19.5996	24	0.7193	18.3589	23	0.73774
ebi-a-GCST90001448	17	0.115	0.74934	0.53443-1.0507	0.1	0.80469	0.62126-1.04229	0.26	0.89637	0.74113-1.08413	0.313	0.82251	0.56936-1.18821	0.211	0.806	0.58284-1.11459	0.06314	0.22804	0.98	6.88832	16	0.97535	5.30873	15	0.98917
ebi-a-GCST90002071	18	0.713	1.03966	0.84806-1.2746	0.849	1.02144	0.82166-1.26979	0.26	1.09328	0.93620-1.27672	0.689	1.07076	0.77005-1.48889	0.871	1.0173	0.83025-1.24650	0.02306	0.46619	0.963	7.80999	17	0.97044	7.25273	16	0.96808
ebi-a-GCST90001453	19	0.259	0.77839	0.51103-1.1856	0.131	0.8157	0.62614-1.06266	0.265	0.89425	0.73475-1.08838	0.295	0.779	0.49491-1.22616	0.239	0.8062	0.57021-1.13986	0.03702	0.47484	0.715	14.3312	18	0.70726	13.7971	17	0.68141
ebi-a-GCST90001712	17	0.535	0.95635	0.83327-1.0976	0.264	0.92504	0.80681-1.06059	0.265	0.94442	0.85400-1.04442	0.668	0.94279	0.72371-1.22818	0.401	0.94279	0.82461-1.07791	-0.00973	0.79724	0.605	14.2043	16	0.5835	14.1358	15	0.51525
ebi-a-GCST90001641	18	0.495	0.90533	0.68498-1.1966	0.344	0.88398	0.68478-1.14112	0.266	0.89796	0.74278-1.08556	0.332	0.82849	0.57279-1.19833	0.311	0.86714	0.66369-1.13297	-0.00329	0.93679	0.346	19.8898	17	0.27991	19.8817	16	0.2256
ebi-a-GCST90001796	16	0.273	0.84693	0.63670-1.1266	0.317	0.87596	0.67575-1.13547	0.267	0.89019	0.72494-1.09311	0.338	0.77375	0.46546-1.28623	0.151	0.83573	0.66223-1.05467	0.02059	0.61983	0.14	22.4866	15	0.09567	22.0806	14	0.07697
ebi-a-GCST90001733	21	0.229	1.20597	0.89786-1.6198	0.133	1.21221	0.94295-1.55836	0.268	1.10369	0.92679-1.31436	0.292	1.27654	0.82065-1.98566	0.174	1.30626	0.90101-1.89378	-0.02181	0.47112	0.414	20.2827	20	0.44037	19.7215	19	0.41151
ebi-a-GCST90001759	24	0.462	1.06008	0.91003-1.2349	0.27	1.09249	0.93348-1.27859	0.273	1.0671	0.95010-1.19851	0.187	1.224	0.91456-1.63814	0.15	1.11137	0.96709-1.27717	0.00328	0.89397	0.285	27.656	23	0.22907	27.6331	22	0.18816
ebi-a-GCST90001523	30	0.847	0.98981	0.89302-1.0971	0.883	1.00823	0.90375-1.12479	0.274	1.04686	0.96440-1.13636	0.362	0.92321	0.77953-1.09338	0.914	0.9933	0.88030-1.12081	0.04575	0.10355	0.391	31.4801	29	0.34315	28.5891	28	0.43359
ebi-a-GCST90001736	24	0.207	1.22236	0.90304-1.6546	0.383	1.12204	0.86610-1.45361	0.276	1.10202	0.92525-1.31256	0.694	1.08426	0.72807-1.61471	0.306	1.16812	0.87312-1.56279	-0.02992	0.42003	0.673	20.0161	23	0.64094	19.3408	22	0.6242
ebi-a-GCST90001794	27	0.6	1.03477	0.91230-1.1737	0.206	1.0749	0.96108-1.20219	0.276	1.05954	0.95476-1.17583	0.714	1.04109	0.84139-1.28819	0.198	1.07176	0.96693-1.18797	0.02262	0.50892	0.093	37.2328	26	0.07122	36.5758	25	0.06331
ebi-a-GCST90001745	29	0.45	0.8862	0.65089-1.2066	0.724	0.95721	0.75062-1.22066	0.279	1.09669	0.92801-1.29604	0.556	0.88105	0.58107-1.33589	0.655	0.93224	0.68778-1.26358	0.05689	0.1208	0.44	28.6605	28	0.42989	26.0942	27	0.51338
ebi-a-GCST90002108	25	0.322	0.93564	0.82245-1.0644	0.287	0.9309	0.81589-1.06212	0.282	0.95515	0.87857-1.03840	0.193	0.86074	0.69120-1.07186	0.178	0.88935	0.75351-1.04968	0.0164	0.68034	0.084	31.0921	24	0.15115	30.8585	23	0.12631
ebi-a-GCST90002109	19	0.456	0.91391	0.72517-1.1518	0.16	0.87074	0.71795-1.05605	0.283	0.93237	0.82057-1.05940	0.37	0.84916	0.59925-1.20329	0.233	0.82103	0.60014-1.12322	0.00785	0.84135	0.583	14.6446	18	0.68621	14.6033	17	0.62403
ebi-a-GCST90001588	29	0.708	0.94236	0.69308-1.2813	0.596	0.93905	0.74409-1.18509	0.286	0.91633	0.78049-1.07582	0.138	0.70623	0.45177-1.10403	0.528	1.11539	0.79796-1.55909	-0.00613	0.83553	0.491	27.113	28	0.5121	27.0689	27	0.46008
ebi-a-GCST90001485	34	0.482	1.03267	0.94513-1.1283	0.463	1.03652	0.94186-1.14069	0.286	1.03816	0.96910-1.11214	0.603	1.05419	0.86583-1.28353	0.282	1.04825	0.96343-1.14054	0.00434	0.85342	0.541	30.5211	33	0.59112	30.4864	32	0.54319
ebi-a-GCST90001482	33	0.189	1.08346	0.96391-1.2178	0.047	1.13929	1.00149-1.29606	0.289	1.05107	0.95859-1.15247	0.462	0.91981	0.73828-1.14598	0.039	1.11878	1.01019-1.23904	-0.02632	0.41141	0.164	40.1112	32	0.15366	39.2337	31	0.14725
ebi-a-GCST90001974	18	0.95	1.0108	0.72797-1.4035	0.716	1.05552	0.78896-1.41212	0.292	1.11819	0.90826-1.37664	0.414	1.23975	0.74934-2.05110	0.82	1.03929	0.74962-1.44090	0.02556	0.44726	0.85	11.5629	17	0.82585	10.9559	16	0.8122
ebi-a-GCST90002020	16	0.031	1.45995	1.07165-1.9889	0.336	1.10818	0.89897-1.36607	0.293	1.08664	0.93074-1.26866	0.375	0.82646	0.54938-1.24329	0.23	1.23611	0.88684-1.72294	-0.10668	0.05126	0.368	16.4568	15	0.35236	11.9137	14	0.61323
ebi-a-GCST90001993	16	0.18	1.30438	0.90199-1.8863	0.718	1.05727	0.78180-1.42979	0.294	1.14077	0.89191-1.45907	0.664	0.86831	0.46509-1.62114	0.028	1.6235	1.09860-2.39918	-0.04986	0.35427	0.114	21.2583	15	0.12878	19.9502	14	0.13172
ebi-a-GCST90001422	24	0.49	0.88939	0.64119-1.2337	0.455	0.90217	0.68858-1.18202	0.295	0.90385	0.74798-1.09221	0.773	0.93859	0.61276-1.43768	0.595	0.91491	0.66216-1.26412	0.00419	0.90573	0.414	23.6606	23	0.4228	23.6452	22	0.3661
ebi-a-GCST90001465	22	0.215	0.92238	0.81499-1.0439	0.225	0.91408	0.79065-1.05679	0.296	0.94903	0.86031-1.04691	0.506	0.92255	0.73038-1.16529	0.261	0.92717	0.81558-1.05403	0.02759	0.45983	0.32	22.762	21	0.3568	22.1334	20	0.33332
ebi-a-GCST90001937	19	0.63	1.04987	0.86426-1.2753	0.68	1.03998	0.86340-1.25268	0.298	1.08289	0.93221-1.25793	0.056	1.68785	1.02226-2.78681	0.711	1.03396	0.86890-1.23036	0.01374	0.62733	0.525	17.491	18	0.48963	17.2431	17	0.43802
ebi-a-GCST90002038	21	0.251	1.11916	0.92883-1.3485	0.198	1.1183	0.94312-1.32601	0.299	1.07246	0.93983-1.22380	0.488	1.11809	0.82057-1.52350	0.199	1.1309	0.94333-1.35578	-0.0187	0.52685	0.293	23.5709	20	0.26164	23.0664	19	0.23443
ebi-a-GCST90001513	21	0.765	1.04575	0.78340-1.3960	0.688	1.05299	0.81810-1.35532	0.301	0.91333	0.76909-1.08463	0.14	0.72505	0.48131-1.09225	0.761	1.05002	0.76996-1.43193	-0.04419	0.26901	0.419	20.5729	20	0.42265	19.2587	19	0.44035
ebi-a-GCST90001591	22	0.723	0.94801	0.70844-1.2686	0.456	0.91049	0.71149-1.16516	0.301	0.9081	0.75635-1.09029	0.581	0.90038	0.62415-1.29885	0.616	0.9291	0.70023-1.23278	-0.01299	0.71398	0.995	8.81646	21	0.99059	8.67826	20	0.98634
ebi-a-GCST90001615	18	0.674	1.09827	0.71481-1.6874	0.593	1.09735	0.78040-1.54303	0.303	1.14976	0.88142-1.49979	0.152	1.79857	0.83601-3.86939	0.951	1.012	0.69332-1.47717	0.01337	0.78981	0.062	27.1537	17	0.05585	27.0296	16	0.04116
ebi-a-GCST90001893	18	0.099	0.75839	0.55642-1.0337	0.461	0.90161	0.68439-1.18779	0.304	0.91057	0.76175-1.08847	0.255	0.77104	0.50007-1.18882	0.394	0.87502	0.64877-1.18016	0.05276	0.17588	0.523	16.5765	17	0.4834	14.5708	16	0.55627
ebi-a-GCST90002098	32	0.296	1.06656	0.94710-1.2011	0.818	0.98451	0.86163-1.12491	0.31	1.04888	0.95656-1.15011	0.895	0.98351	0.76942-1.25717	0.55	1.04438	0.90723-1.20226	-0.01218	0.66532	0.926	19.5289	31	0.94537	19.338	30	0.93265
ebi-a-GCST90001537	25	0.299	0.86736	0.66698-1.1280	0.015	0.75892	0.60784-0.94755	0.312	0.91105	0.76053-1.09137	0.367	0.79563	0.48888-1.29486	0.05	0.7774	0.61182-0.98778	0.02078	0.61341	0.041	37.0448	24	0.04331	36.627	23	0.03556
ebi-a-GCST90001694	24	0.391	0.89743	0.70408-1.1439	0.556	0.9298	0.72970-1.18477	0.313	0.92414	0.79294-1.07705	0.658	0.92531	0.65893-1.29938	0.609	0.94462	0.76161-1.17160	0.00962	0.76295	0.914	15.2133	23	0.88683	15.1201	22	0.85703
ebi-a-GCST90001743	25	0.934	1.01129	0.77697-1.3163	0.329	1.10889	0.90121-1.36443	0.314	1.07624	0.93284-1.24169	0.983	0.99613	0.69557-1.42656	0.421	1.11744	0.85677-1.45742	0.01767	0.58693	0.817	18.1394	24	0.79619	17.8358	23	0.76634
ebi-a-GCST90001921	18	0.337	1.09268	0.91676-1.3024	0.392	1.0919	0.89285-1.33532	0.314	1.07146	0.93672-1.22558	0.255	1.2183	0.87747-1.69152	0.167	1.17257	0.94487-1.45513	-0.00938	0.73804	0.602	14.6683	17	0.61936	14.5525	16	0.55762
ebi-a-GCST90001801	24	0.497	0.93048	0.75827-1.1418	0.543	1.05439	0.88892-1.25067	0.319	0.94506	0.84573-1.05606	0.73	1.06261	0.75544-1.49467	0.356	1.1136	0.89012-1.39319	0.00729	0.86091	0.801	15.7423	23	0.86608	15.7108	22	0.82997
ebi-a-GCST90001961	23	0.237	1.08384	0.95201-1.2339	0.59	1.03355	0.91661-1.16541	0.319	1.04637	0.95719-1.14387	0.989	1.00158	0.80987-1.23867	0.436	1.04651	0.93538-1.17085	-0.02551	0.4725	0.811	16.6597	22	0.78185	16.1244	21	0.76262
ebi-a-GCST90001734	16	0.255	1.20302	0.88677-1.6321	0.409	1.12734	0.84806-1.49859	0.319	1.106	0.90701-1.34864	0.528	0.8362	0.48599-1.43878	0.224	1.23354	0.89180-1.70624	-0.0314	0.48328	0.315	16.792	15	0.33145	16.1921	14	0.30178
ebi-a-GCST90001888	18	0.301	0.86184	0.65620-1.1319	0.458	0.91767	0.73128-1.15157	0.32	0.9219	0.78535-1.08219	0.26	0.79716	0.54463-1.16680	0.554	0.92614	0.72182-1.18829	0.02245	0.55762	0.63	15.2817	17	0.5752	14.923	16	0.53029
ebi-a-GCST90002058	29	0.651	0.9492	0.75907-1.1869	0.893	0.98778	0.82607-1.18115	0.321	1.07584	0.93108-1.24311	0.257	1.23017	0.86641-1.74665	0.903	0.9888	0.82612-1.18351	0.04733	0.16658	0.061	41.2903	28	0.0505	38.4148	27	0.07154
ebi-a-GCST90001964	25	0.136	0.87279	0.73441-1.0372	0.234	0.90315	0.76355-1.06829	0.322	0.93836	0.82724-1.06440	0.347	1.16554	0.85236-1.59377	0.422	0.93188	0.78680-1.10371	0.03975	0.24544	0.078	34.971	24	0.06883	32.9365	23	0.08218
ebi-a-GCST90001881	16	0.477	0.8412	0.52896-1.3378	0.478	0.91928	0.72860-1.15987	0.325	0.89798	0.72464-1.11278	0.809	0.94513	0.60341-1.48035	0.902	0.97194	0.62190-1.51902	0.02105	0.7582	0.009	31.7537	15	0.00695	31.5317	14	0.00467
ebi-a-GCST90001443	19	0.586	1.07994	0.82328-1.4166	0.756	0.96044	0.74427-1.23940	0.333	0.91097	0.75420-1.10033	0.817	0.94653	0.59818-1.49773	0.753	0.96029	0.74859-1.23185	-0.05945	0.1182	0.28	22.006	18	0.23172	18.9822	17	0.32956
ebi-a-GCST90002103	10	0.345	0.8898	0.70852-1.1175	0.556	0.93491	0.74735-1.16953	0.336	0.91779	0.77065-1.09302	0.513	0.87415	0.59332-1.28791	0.56	0.93302	0.74519-1.16820	0.02265	0.68885	0.657	7.69115	9	0.56555	7.51869	8	0.48184
ebi-a-GCST90001665	26	0.677	1.02062	0.92828-1.1221	0.28	1.05447	0.95777-1.16094	0.336	1.04169	0.95849-1.13210	0.029	1.20829	1.02958-1.41802	0.306	1.04032	0.96603-1.12033	0.02434	0.3806	0.055	39.3148	25	0.03425	38.0499	24	0.03427
ebi-a-GCST90001395	23	0.977	1.00276	0.83214-1.2084	0.377	1.10542	0.88496-1.38080	0.339	0.9291	0.79913-1.08020	0.986	1.00378	0.65983-1.52701	0.546	1.06877	0.86398-1.32210	-0.03632	0.20083	0.291	23.9679	22	0.34891	22.13	21	0.39205
ebi-a-GCST90002112	14	0.512	0.94566	0.80424-1.1120	0.315	0.92863	0.80384-1.07280	0.339	0.94876	0.85181-1.05673	0.81	1.03552	0.78329-1.36898	0.243	0.91341	0.79000-1.05611	0.00195	0.95866	0.733	9.1495	13	0.76156	9.1467	12	0.69035
ebi-a-GCST90001455	13	0.976	1.00982	0.53852-1.8936	0.538	1.10778	0.79952-1.53490	0.341	1.13824	0.87203-1.48570	0.482	0.82567	0.49218-1.38513	0.844	0.95505	0.61009-1.49506	0.02639	0.68584	0.25	15.4144	12	0.21955	15.1763	11	0.17457
ebi-a-GCST90001486	15	0.363	0.92546	0.78780-1.0872	0.71	1.02649	0.89455-1.17789	0.342	0.93801	0.82199-1.07040	0.401	0.87696	0.65160-1.18025	0.633	0.96721	0.84608-1.10568	0.01293	0.76231	0.162	21.0475	14	0.10042	20.8941	13	0.07505
ebi-a-GCST90001747	24	0.42	1.07032	0.91031-1.2585	0.321	1.08109	0.92681-1.26104	0.342	1.05796	0.94181-1.18843	0.479	1.11985	0.82302-1.52372	0.349	1.08263	0.91998-1.27402	-0.00501	0.83799	0.359	26.0149	23	0.30017	25.9643	22	0.25322
ebi-a-GCST90001653	26	0.484	0.91496	0.71593-1.1693	0.486	0.91825	0.72228-1.16740	0.344	0.92832	0.79580-1.08290	0.545	0.89167	0.61817-1.28617	0.322	0.89938	0.73201-1.10502	0.00434	0.88177	0.531	24.7511	25	0.47639	24.7279	24	0.42067
ebi-a-GCST90001656	26	0.484	1.09295	0.85520-1.3968	0.489	1.08903	0.85551-1.38629	0.344	1.07722	0.92344-1.25660	0.558	1.12149	0.76812-1.63743	0.358	1.11187	0.89055-1.38821	-0.00434	0.88177	0.533	24.7511	25	0.47639	24.7279	24	0.42067
ebi-a-GCST90001758	28	0.444	1.09433	0.87184-1.3736	0.486	1.08693	0.85982-1.37401	0.344	1.07705	0.92354-1.25608	0.307	0.8017	0.52865-1.21577	0.388	1.09727	0.89186-1.34997	-0.00492	0.85127	0.405	29.5735	27	0.33365	29.5328	26	0.28742
ebi-a-GCST90001660	25	0.168	0.87896	0.73579-1.0500	0.974	0.99695	0.82827-1.19998	0.344	0.94226	0.83301-1.06584	0.994	0.99883	0.74649-1.33648	0.825	0.98062	0.82572-1.16458	0.0317	0.29852	0.823	18.0862	24	0.79881	16.9548	23	0.81146
ebi-a-GCST90001454	17	0.49	0.82449	0.48299-1.4075	0.873	1.02581	0.74964-1.40372	0.345	1.12173	0.88379-1.42372	0.663	0.88566	0.51847-1.51292	0.569	0.85676	0.50858-1.44331	0.05982	0.22674	0.746	12.052	16	0.74039	10.4631	15	0.78964
ebi-a-GCST90001717	23	0.275	0.92852	0.81561-1.0571	0.31	0.93481	0.82068-1.06481	0.346	0.95415	0.86547-1.05191	0.319	0.88137	0.69137-1.12359	0.331	0.93933	0.83026-1.06272	0.02032	0.53138	0.46	22.8131	22	0.41235	22.3815	21	0.37782
ebi-a-GCST90001602	21	0.789	1.02722	0.84639-1.2467	0.703	0.96356	0.79626-1.16602	0.347	0.92652	0.79026-1.08629	0.326	0.8372	0.59258-1.18279	0.941	0.99404	0.85042-1.16192	-0.05691	0.10754	0.113	30.8959	20	0.05658	26.8621	19	0.10791
ebi-a-GCST90001892	16	0.994	0.99933	0.84666-1.1795	0.814	0.98199	0.84397-1.14258	0.347	0.94858	0.84974-1.05892	0.899	0.98643	0.80086-1.21499	0.743	0.9773	0.85429-1.11804	-0.03345	0.42387	0.892	9.32117	15	0.86013	8.64255	14	0.85325
ebi-a-GCST90001617	20	0.958	1.00455	0.85098-1.1858	0.666	1.04139	0.86607-1.25219	0.348	1.06883	0.93005-1.22833	0.723	0.94977	0.71688-1.25831	0.801	1.02064	0.87241-1.19407	0.03472	0.21232	0.297	23.1014	19	0.2329	21.1378	18	0.27252
ebi-a-GCST90001702	18	0.54	0.95291	0.81927-1.1083	0.373	0.94345	0.82995-1.07247	0.349	0.9492	0.85104-1.05868	0.65	1.06552	0.81392-1.39491	0.445	0.94932	0.83336-1.08141	-0.00304	0.94057	0.383	19.596	17	0.29542	19.5889	16	0.23931
ebi-a-GCST90001791	25	0.961	0.99592	0.84788-1.1698	0.845	0.982	0.81871-1.17785	0.35	1.06144	0.93665-1.20285	0.817	1.03995	0.74886-1.44419	0.882	0.98717	0.83392-1.16858	0.03214	0.2299	0.728	18.1863	24	0.79388	16.6651	23	0.82535
ebi-a-GCST90001859	22	0.804	1.02592	0.84004-1.2529	0.531	0.94085	0.77748-1.13856	0.355	0.93731	0.81719-1.07509	0.849	0.96989	0.71057-1.32385	0.782	0.97733	0.83236-1.14754	-0.03681	0.24184	0.341	24.0189	21	0.29214	22.3903	20	0.31971
ebi-a-GCST90001729	18	0.449	0.85058	0.56524-1.2800	0.165	0.81273	0.60661-1.08889	0.356	0.89459	0.70608-1.13344	0.261	0.7416	0.44808-1.22741	0.266	0.75288	0.46403-1.22151	0.01577	0.76724	0.12	23.9598	17	0.12053	23.8248	16	0.0934
ebi-a-GCST90002086	21	0.765	0.96377	0.75930-1.2233	0.811	0.97458	0.78885-1.20404	0.357	0.9285	0.79301-1.08714	0.561	0.89152	0.60936-1.30432	0.713	0.95397	0.74507-1.22144	-0.01226	0.68733	1	5.97661	20	0.99893	5.80958	19	0.99834
ebi-a-GCST90001713	15	0.058	0.63168	0.40939-0.9747	0.332	0.84855	0.60903-1.18228	0.359	0.89956	0.71735-1.12806	0.511	1.21336	0.69176-2.12826	0.259	0.80762	0.56571-1.15298	0.08862	0.08374	0.596	12.3179	14	0.58079	8.81013	13	0.78713
ebi-a-GCST90002059	18	0.855	1.02846	0.76436-1.3838	0.724	1.04365	0.82346-1.32271	0.361	0.91883	0.76627-1.10177	0.264	0.80237	0.55236-1.16555	0.911	1.01251	0.81606-1.25626	-0.0383	0.35974	0.175	22.9026	17	0.15245	21.6969	16	0.15325
ebi-a-GCST90001936	22	0.471	0.95495	0.84440-1.0800	0.908	0.99187	0.86422-1.13838	0.362	0.95374	0.86145-1.05592	0.778	0.96002	0.72535-1.27061	0.977	1.0017	0.89533-1.12070	-0.00097	0.97001	0.329	23.4152	21	0.32225	23.4135	20	0.26895
ebi-a-GCST90001452	24	0.424	1.08161	0.89559-1.3063	0.939	1.00753	0.83176-1.22046	0.363	0.93739	0.81553-1.07747	0.168	0.77766	0.55015-1.09925	0.866	1.01567	0.84982-1.21389	-0.06505	0.04661	0.347	24.8923	23	0.35586	20.4466	22	0.55512
ebi-a-GCST90001629	30	0.585	1.06348	0.85482-1.3231	0.523	0.9409	0.78044-1.13434	0.363	0.94136	0.82642-1.07229	0.291	0.83558	0.60215-1.15948	0.584	0.9417	0.76140-1.16470	-0.03941	0.18361	0.683	24.7758	29	0.68983	22.9169	28	0.73719
ebi-a-GCST90001773	39	0.051	0.89217	0.79864-0.9966	0.492	0.95603	0.84088-1.08695	0.364	0.96146	0.88331-1.04653	0.74	0.9632	0.77310-1.20005	0.184	0.90569	0.78473-1.04530	0.0411	0.04669	0.634	34.0068	38	0.65465	29.7716	37	0.79483
ebi-a-GCST90001806	28	0.035	1.40122	1.04176-1.8847	0.158	1.16873	0.94107-1.45147	0.364	1.07671	0.91776-1.26318	0.337	1.18747	0.84148-1.67572	0.153	1.1775	0.94698-1.46415	-0.07773	0.0532	0.22	33.3764	27	0.18493	28.8278	26	0.31897
ebi-a-GCST90001769	28	0.947	0.99398	0.83379-1.1850	0.815	0.9812	0.83699-1.15025	0.366	1.05927	0.93497-1.20010	0.903	1.017	0.77838-1.32877	0.854	1.017	0.85106-1.21530	0.03077	0.32289	0.253	32.106	27	0.22818	30.8992	26	0.23204
ebi-a-GCST90001805	25	0.687	1.0406	0.85929-1.2602	0.731	1.03087	0.86672-1.22610	0.367	1.05971	0.93413-1.20217	0.409	1.11758	0.86228-1.44847	0.423	1.07209	0.90701-1.26723	0.00783	0.80654	0.645	22.0699	24	0.5751	22.0085	23	0.51974
ebi-a-GCST90001604	17	0.146	0.5183	0.22393-1.1996	0.659	1.07681	0.77532-1.49555	0.368	0.88306	0.67361-1.15764	0.514	1.2061	0.69609-2.08977	0.633	1.12433	0.70132-1.80251	0.10385	0.20942	0.12	22.847	16	0.11788	20.4968	15	0.15369
ebi-a-GCST90001865	19	0.765	0.93385	0.60051-1.4522	0.329	0.87638	0.67224-1.14252	0.369	0.91909	0.76448-1.10498	0.339	0.76876	0.45470-1.29972	0.248	0.73598	0.44482-1.21771	-0.00359	0.93852	0.398	18.8516	18	0.40102	18.8448	17	0.33751
ebi-a-GCST90002065	14	0.227	1.20161	0.90550-1.5945	0.229	1.16807	0.90694-1.50438	0.372	1.08777	0.90445-1.30825	0.477	1.1332	0.81113-1.58317	0.306	1.15928	0.88359-1.52099	-0.03641	0.38091	0.747	10.0745	13	0.68783	9.24702	12	0.6817
ebi-a-GCST90001832	15	0.954	1.00754	0.78552-1.2923	0.421	1.09462	0.87812-1.36450	0.372	1.08252	0.90952-1.28842	0.014	1.73815	1.17884-2.56283	0.504	1.06808	0.88503-1.28899	0.03096	0.43753	0.182	19.8306	14	0.13557	18.8979	13	0.1263
ebi-a-GCST90001624	21	0.492	1.10458	0.83625-1.4590	0.584	1.06024	0.85981-1.30741	0.372	1.08296	0.90903-1.29018	0.764	1.05276	0.75555-1.46688	0.592	1.06175	0.85589-1.31713	-0.00669	0.85737	0.17	27.103	20	0.13239	27.0558	19	0.10336
ebi-a-GCST90002072	23	0.898	1.01558	0.80446-1.2821	0.776	1.03405	0.82085-1.30264	0.373	1.07132	0.92055-1.24679	0.16	1.45133	0.87810-2.39877	0.267	0.84314	0.62867-1.13079	0.01898	0.55585	0.131	27.5171	22	0.19224	27.0555	21	0.16902
ebi-a-GCST90001401	24	0.385	0.78077	0.45192-1.3489	0.108	0.79249	0.59693-1.05211	0.373	0.89329	0.69676-1.14525	0.377	0.80429	0.50087-1.29151	0.16	0.79431	0.58217-1.08375	0.03275	0.59191	0.012	39.9503	23	0.01557	39.42	22	0.01263
ebi-a-GCST90002024	19	0.404	1.16863	0.81769-1.6702	0.218	1.15091	0.92022-1.43944	0.377	1.07814	0.91229-1.27414	0.804	1.04501	0.74219-1.47137	0.394	1.1356	0.85389-1.51024	-0.02086	0.62318	0.956	8.91762	18	0.96162	8.66718	17	0.95013
ebi-a-GCST90002044	9	0.931	0.94739	0.28997-3.0954	0.429	0.87525	0.62916-1.21758	0.378	0.8929	0.69404-1.14873	0.592	0.87214	0.53972-1.40929	0.621	0.88029	0.54175-1.43038	-0.01189	0.92286	0.865	3.90601	8	0.8655	3.89593	7	0.79168
ebi-a-GCST90001471	19	0.154	0.85848	0.70248-1.0491	0.335	0.90421	0.73684-1.10960	0.38	0.939	0.81586-1.08072	0.628	0.91721	0.65021-1.29385	0.324	0.8921	0.71543-1.11240	0.03899	0.236	0.948	8.73866	18	0.96549	7.2295	17	0.98038
ebi-a-GCST90002083	23	0.212	1.30344	0.87103-1.9505	0.963	0.99419	0.77573-1.27418	0.386	0.92509	0.77568-1.10326	0.854	0.95753	0.60572-1.51367	0.766	1.05872	0.73052-1.53438	-0.07461	0.0779	0.683	18.6252	22	0.66835	15.1895	21	0.81333
ebi-a-GCST90001639	16	0.84	1.04078	0.71109-1.5233	0.77	0.95571	0.70493-1.29570	0.387	0.90972	0.73411-1.12733	0.602	0.87564	0.53691-1.42807	0.688	0.92605	0.64135-1.33713	-0.03371	0.41613	0.818	9.81897	15	0.83097	9.11678	14	0.8235
ebi-a-GCST90001833	25	0.346	0.85274	0.61642-1.1797	0.978	1.00334	0.79454-1.26703	0.388	1.07492	0.91233-1.26649	0.529	1.14867	0.75106-1.75676	0.71	0.94168	0.68894-1.28715	0.0572	0.11874	0.49	22.7344	24	0.53552	20.1081	23	0.63538
ebi-a-GCST90001684	15	0.802	1.06817	0.64422-1.7711	0.573	0.91678	0.67748-1.24061	0.388	0.90595	0.72381-1.13392	0.758	0.92718	0.57909-1.48452	0.831	0.95621	0.63798-1.43319	-0.03464	0.48875	0.625	12.124	14	0.59635	11.6163	13	0.55933
ebi-a-GCST90001392	28	0.13	0.91767	0.82392-1.0221	0.581	0.96408	0.84653-1.09795	0.39	0.95962	0.87361-1.05410	0.611	0.92461	0.68602-1.24617	0.405	0.95544	0.85972-1.06182	0.03804	0.10959	0.802	21.7731	27	0.74882	19.0283	26	0.83523
ebi-a-GCST90001792	24	0.411	0.94099	0.81623-1.0848	0.553	0.95646	0.82575-1.10785	0.39	0.95205	0.85109-1.06498	0.978	0.99615	0.76265-1.30113	0.666	0.97313	0.86145-1.09929	0.00755	0.78886	0.16	30.5305	23	0.13477	30.4289	22	0.10841
ebi-a-GCST90001901	20	0.17	0.93628	0.85543-1.0248	0.498	0.96231	0.86098-1.07555	0.39	0.96575	0.89194-1.04567	0.281	1.13624	0.90672-1.42384	0.329	0.95467	0.87187-1.04533	0.0388	0.17348	0.793	14.4243	19	0.75842	12.4156	18	0.82506
ebi-a-GCST90001869	34	0.914	0.9884	0.80075-1.2200	0.162	0.87489	0.72533-1.05531	0.394	0.94662	0.83446-1.07386	0.416	0.87831	0.64483-1.19633	0.172	0.87139	0.71840-1.05695	-0.01434	0.61676	0.46	33.424	33	0.44668	33.1594	32	0.41044
ebi-a-GCST90001711	20	0.887	1.00991	0.88275-1.1554	0.321	0.93476	0.81811-1.06804	0.394	0.9572	0.86559-1.05849	0.436	1.10843	0.86029-1.42815	0.79	0.9824	0.86345-1.11774	-0.03871	0.2551	0.61	17.2981	19	0.56968	15.9163	18	0.59839
ebi-a-GCST90001638	30	0.58	0.90921	0.65160-1.2687	0.516	0.92512	0.73152-1.16997	0.396	0.93111	0.78950-1.09812	0.447	0.85953	0.58497-1.26294	0.755	0.95137	0.69771-1.29725	0.00645	0.87311	0.75	23.4318	29	0.75642	23.4058	28	0.71247
ebi-a-GCST90001519	18	0.525	0.93446	0.76151-1.1467	0.386	0.92609	0.77854-1.10160	0.397	0.94671	0.83395-1.07471	0.458	0.90817	0.70835-1.16436	0.361	0.92146	0.77668-1.09322	0.00593	0.87334	0.455	18.2761	17	0.37163	18.2461	16	0.30968
ebi-a-GCST90001484	27	0.396	1.06804	0.91981-1.2402	0.73	1.02184	0.90401-1.15503	0.399	1.04556	0.94278-1.15955	0.172	1.2245	0.92310-1.62431	0.705	1.02528	0.90244-1.16485	-0.01208	0.69763	0.403	28.3372	26	0.34207	28.1631	25	0.3004
ebi-a-GCST90001904	23	0.729	0.96039	0.76656-1.2032	0.52	0.93135	0.74989-1.15673	0.401	0.94019	0.81408-1.08583	0.228	0.80939	0.57950-1.13047	0.406	0.89049	0.68087-1.16466	-0.00779	0.8124	0.736	17.5294	22	0.7335	17.4716	21	0.68215
ebi-a-GCST90001633	28	0.259	1.17147	0.89534-1.5327	0.999	0.99984	0.78784-1.26888	0.404	1.07187	0.91070-1.26156	0.56	0.87859	0.57182-1.34993	0.852	0.96542	0.66964-1.39185	-0.02626	0.42272	0.537	25.4793	27	0.54762	24.8158	26	0.52942
ebi-a-GCST90001541	35	0.115	1.21262	0.96013-1.5315	0.372	1.10671	0.88592-1.38251	0.404	1.06204	0.92207-1.22327	0.78	1.05832	0.71374-1.56928	0.381	1.135	0.85802-1.50138	-0.03682	0.1713	0.977	20.1855	34	0.97089	18.2298	33	0.9825
ebi-a-GCST90001410	18	0.788	0.93902	0.59868-1.4728	0.434	0.88967	0.66367-1.19264	0.404	0.90996	0.72900-1.13584	0.717	0.9149	0.56968-1.46932	0.681	0.90984	0.58430-1.41673	-0.00681	0.87697	0.972	8.12177	17	0.96387	8.09703	16	0.94593
ebi-a-GCST90001837	21	0.435	0.89517	0.68190-1.1751	0.786	1.02564	0.85437-1.23124	0.405	0.94708	0.83328-1.07644	0.674	1.075	0.77099-1.49888	0.691	1.05526	0.81281-1.37003	0.01876	0.64871	0.37	21.9167	20	0.34505	21.6723	19	0.30087
ebi-a-GCST90001577	31	0.409	0.88189	0.65742-1.1830	0.606	0.92876	0.70113-1.23030	0.406	0.93072	0.78562-1.10262	0.642	0.89351	0.55811-1.43047	0.592	0.91477	0.66274-1.26265	0.01273	0.66303	0.977	16.8881	30	0.97389	16.6943	29	0.96672
ebi-a-GCST90001998	25	0.848	1.02136	0.82512-1.2643	0.558	1.06427	0.86418-1.31069	0.41	1.06649	0.91502-1.24304	0.936	1.01664	0.68194-1.51559	0.568	1.06754	0.85586-1.33158	0.0181	0.56789	0.152	31.4682	24	0.14074	31.0154	23	0.12242
ebi-a-GCST90002082	18	0.861	0.98296	0.81307-1.1883	0.89	0.98532	0.79902-1.21506	0.411	0.93777	0.80458-1.09300	0.869	1.0267	0.75405-1.39794	0.88	0.98491	0.81022-1.19727	-0.02941	0.42216	0.891	10.0798	17	0.90023	9.40108	16	0.89598
ebi-a-GCST90001949	21	0.741	1.02618	0.88231-1.1935	0.691	0.97804	0.87657-1.09127	0.413	0.96279	0.87924-1.05427	0.398	1.14335	0.84349-1.54982	0.806	0.98587	0.88157-1.10251	-0.03335	0.31402	0.491	21.349	20	0.37685	20.2112	19	0.38197
ebi-a-GCST90001744	15	0.217	1.74247	0.75316-4.0313	0.458	1.16628	0.77669-1.75131	0.414	1.13242	0.84035-1.52602	0.616	1.16647	0.64744-2.10160	0.48	1.2261	0.70744-2.12503	-0.07121	0.30088	0.553	12.8846	14	0.53563	11.7238	13	0.55042
ebi-a-GCST90001677	25	0.981	0.99581	0.71312-1.3906	0.801	0.96573	0.73667-1.26601	0.415	0.9241	0.76444-1.11711	0.985	0.99498	0.59308-1.66924	0.809	1.05586	0.68227-1.63401	-0.01694	0.59912	0.502	23.1761	24	0.50942	22.892	23	0.46709
ebi-a-GCST90001841	24	0.433	1.06991	0.90640-1.2629	0.716	0.96957	0.82106-1.14494	0.415	0.95467	0.85395-1.06726	0.932	1.0132	0.75198-1.36517	0.921	1.00704	0.87794-1.15511	-0.05334	0.08251	0.476	22.7088	23	0.47788	19.399	22	0.62057
ebi-a-GCST90001413	18	0.196	1.09263	0.96074-1.2426	0.313	1.08466	0.92623-1.27019	0.416	1.04494	0.93987-1.16175	0.455	1.10678	0.85350-1.43522	0.186	1.10096	0.96024-1.26232	-0.03913	0.24777	0.553	15.2853	17	0.57494	13.8463	16	0.61016
ebi-a-GCST90002029	23	0.144	0.76564	0.54211-1.0813	0.472	0.90916	0.70136-1.17853	0.417	1.08416	0.89205-1.31765	0.99	1.00333	0.61375-1.64018	0.319	0.87133	0.66849-1.13571	0.09778	0.03139	0.119	29.0029	22	0.14478	23.1419	21	0.33646
ebi-a-GCST90001507	26	0.967	1.00253	0.89145-1.1274	0.774	0.98057	0.85782-1.12089	0.418	0.9627	0.87801-1.05556	0.258	0.87121	0.68991-1.10015	0.861	0.98855	0.86985-1.12344	-0.03232	0.28632	0.571	22.6124	25	0.60018	21.4232	24	0.61365
ebi-a-GCST90001654	31	0.406	0.90426	0.71552-1.1428	0.615	0.93999	0.73868-1.19616	0.42	0.94075	0.81089-1.09142	0.839	0.95993	0.64997-1.41769	0.618	0.94359	0.75298-1.18245	0.01157	0.67142	0.926	20.2462	30	0.90997	20.0626	29	0.89097
ebi-a-GCST90001636	10	0.51	1.64469	0.40021-6.7590	0.775	0.9388	0.60939-1.44628	0.421	0.86661	0.61164-1.22786	0.744	0.89474	0.46873-1.70790	0.844	0.94297	0.53516-1.66155	-0.1073	0.38576	0.296	11.7086	9	0.23024	10.5941	8	0.22577
ebi-a-GCST90002031	21	0.303	1.06105	0.95085-1.1840	0.86	0.99065	0.89257-1.09950	0.424	1.03446	0.95209-1.12395	0.838	0.97635	0.77861-1.22430	0.936	1.00418	0.90788-1.11069	-0.01723	0.49615	0.822	13.4462	20	0.85743	12.9647	19	0.84037
ebi-a-GCST90002110	20	0.712	1.02753	0.89144-1.1844	0.671	1.02741	0.90706-1.16374	0.426	0.95803	0.86198-1.06478	0.764	0.96115	0.74459-1.24069	0.341	1.06276	0.94047-1.20096	-0.04537	0.17748	0.056	28.7071	19	0.07073	25.8754	18	0.10264
ebi-a-GCST90001793	19	0.323	1.26872	0.80239-2.0061	0.325	1.15543	0.86669-1.54035	0.427	1.10533	0.86337-1.41511	0.927	1.02505	0.61027-1.72173	0.501	1.13053	0.79664-1.60438	-0.03369	0.49067	0.022	32.0125	18	0.02191	31.1044	17	0.0194
ebi-a-GCST90001840	21	0.216	1.23994	0.89195-1.7237	0.961	0.99393	0.77847-1.26902	0.427	1.07034	0.90504-1.26583	0.699	0.91422	0.58430-1.43044	0.487	0.86233	0.57215-1.29967	-0.04747	0.32197	0.72	15.6083	20	0.74061	14.5742	19	0.74925
ebi-a-GCST90001930	18	0.61	0.92438	0.68749-1.2429	0.452	0.91302	0.72041-1.15712	0.427	0.93185	0.78286-1.10920	0.55	0.88125	0.58694-1.32313	0.909	0.98301	0.73524-1.31427	0.00219	0.94826	0.831	11.341	17	0.8383	11.3367	16	0.78824
ebi-a-GCST90001564	16	0.503	0.92223	0.73218-1.1616	0.79	1.03559	0.80072-1.33936	0.428	0.93383	0.78832-1.10620	0.884	0.96978	0.64656-1.45457	0.924	1.0126	0.78682-1.30317	0.00544	0.878	0.564	12.8109	15	0.6169	12.7865	14	0.5434
ebi-a-GCST90001839	18	0.656	0.95236	0.77122-1.1760	0.953	1.00641	0.81504-1.24272	0.431	1.06409	0.91156-1.24215	0.577	1.11758	0.76218-1.63870	0.876	1.01479	0.84677-1.21613	0.04856	0.16273	0.332	19.5858	17	0.29596	17.2738	16	0.3681
ebi-a-GCST90001668	30	0.287	0.95389	0.87596-1.0387	0.831	0.9895	0.89802-1.09030	0.432	0.97151	0.90386-1.04421	0.907	0.991	0.85258-1.15188	0.59	0.97731	0.89993-1.06135	0.01789	0.43546	0.953	18.2454	29	0.93912	17.6194	28	0.93533
ebi-a-GCST90001682	15	0.59	0.83238	0.43436-1.5951	0.6	1.09513	0.77985-1.53787	0.434	1.12913	0.83291-1.53071	0.592	1.15608	0.68841-1.94146	0.919	1.02145	0.68241-1.52892	0.07143	0.31783	0.057	24.9534	14	0.03503	23.0408	13	0.04119
ebi-a-GCST90001908	22	0.812	1.03502	0.78205-1.3698	0.783	1.03445	0.81258-1.31690	0.437	0.93879	0.80049-1.10099	0.589	1.10449	0.77432-1.57544	0.61	1.07895	0.80933-1.43839	-0.02962	0.41653	0.696	17.5785	21	0.6755	16.8902	20	0.66009
ebi-a-GCST90001922	18	0.696	0.87576	0.45520-1.6849	0.961	0.99214	0.72423-1.35916	0.438	0.91391	0.72787-1.14752	0.993	1.00241	0.59029-1.70224	0.917	0.97308	0.58704-1.61299	0.00844	0.89334	0.796	11.9501	17	0.80315	11.9316	16	0.74868
ebi-a-GCST90001875	18	0.813	0.97896	0.82298-1.1645	0.683	1.03348	0.88257-1.21019	0.439	0.95859	0.86126-1.06691	0.471	0.91278	0.71608-1.16351	0.688	1.04492	0.84655-1.28977	-0.0111	0.76275	0.4	17.6289	17	0.41261	17.5256	16	0.3524
ebi-a-GCST90001651	23	0.785	1.04011	0.78667-1.3752	0.964	1.00551	0.79225-1.27618	0.44	0.92352	0.75459-1.13028	0.265	0.71896	0.40860-1.26507	0.62	1.06083	0.84297-1.33500	-0.04192	0.24503	0.036	36.0846	22	0.02974	33.7834	21	0.03822
ebi-a-GCST90001492	22	0.822	0.99106	0.91763-1.0704	0.56	0.97413	0.89196-1.06386	0.44	0.97506	0.91448-1.03965	0.903	1.00747	0.89469-1.13447	0.516	0.97293	0.89694-1.05536	-0.02296	0.45205	0.5	21.5863	21	0.42367	20.9695	20	0.39893
ebi-a-GCST90001421	23	0.971	1.00575	0.74164-1.3639	0.78	0.96157	0.73017-1.26631	0.442	0.92904	0.77021-1.12061	0.97	1.00987	0.60424-1.68778	0.727	0.95112	0.72067-1.25527	-0.01976	0.52079	0.39	23.6174	22	0.3676	23.1472	21	0.33618
ebi-a-GCST90001514	19	0.705	0.9645	0.80252-1.1592	0.724	0.96755	0.80586-1.16169	0.442	1.04957	0.92784-1.18728	0.931	0.98702	0.73687-1.32209	0.623	0.94818	0.76980-1.16789	0.04078	0.24107	0.653	14.6924	18	0.68297	13.2168	17	0.72156
ebi-a-GCST90001787	22	0.687	1.03868	0.86598-1.2458	0.51	1.06323	0.88595-1.27597	0.444	1.05219	0.92357-1.19872	0.955	1.00787	0.77182-1.31613	0.626	1.0427	0.88334-1.23080	0.00621	0.83959	0.374	23.8932	21	0.29826	23.8431	20	0.24931
ebi-a-GCST90001593	22	0.08	0.7548	0.55966-1.0180	0.216	0.85663	0.67032-1.09472	0.445	0.93117	0.77559-1.11797	0.134	0.69355	0.43779-1.09873	0.224	0.84818	0.65557-1.09737	0.06202	0.10513	0.168	26.6568	21	0.1825	23.3002	20	0.2743
ebi-a-GCST90001790	24	0.82	1.02321	0.84144-1.2442	0.826	1.02137	0.84543-1.23394	0.447	1.05219	0.92296-1.19951	0.635	1.07231	0.80658-1.42560	0.855	1.01859	0.83806-1.23802	0.01052	0.70977	0.594	20.957	23	0.58371	20.8149	22	0.5322
ebi-a-GCST90001399	16	0.329	0.82335	0.56474-1.2004	0.305	0.8584	0.64117-1.14925	0.448	0.92532	0.75734-1.13057	0.94	1.02084	0.60392-1.72559	0.287	0.83295	0.60220-1.15211	0.02912	0.48547	0.543	13.8502	15	0.53692	13.3369	14	0.50019
ebi-a-GCST90002046	22	0.484	1.03808	0.93669-1.1505	0.36	1.04814	0.94780-1.15910	0.448	1.03175	0.95175-1.11848	0.276	1.11872	0.91904-1.36180	0.64	1.02372	0.92919-1.12788	-0.00575	0.84651	0.18	26.8924	21	0.17444	26.8408	20	0.1398
ebi-a-GCST90001650	23	0.951	1.008	0.78230-1.2988	0.415	1.09565	0.87974-1.36456	0.449	1.06042	0.91105-1.23429	0.471	1.14869	0.79327-1.66334	0.353	1.11056	0.89407-1.37947	0.01604	0.62954	0.809	16.6257	22	0.78367	16.386	21	0.74758
ebi-a-GCST90001470	23	0.368	1.16799	0.83888-1.6262	0.818	1.02965	0.80262-1.32091	0.452	1.07209	0.89427-1.28527	0.92	1.02484	0.63883-1.64407	0.945	1.01075	0.74945-1.36316	-0.02373	0.54818	0.337	24.772	22	0.3081	24.3402	21	0.27687
ebi-a-GCST90002107	6	0.752	1.1006	0.63173-1.9175	0.878	1.02076	0.78440-1.32835	0.452	1.07824	0.88608-1.31208	0.912	0.97986	0.69588-1.37972	0.973	0.99411	0.71588-1.38047	-0.01915	0.94197	0.84	1.97707	5	0.85231	1.97107	4	0.74108
ebi-a-GCST90001584	23	0.273	1.12286	0.91768-1.3739	0.204	1.14401	0.92961-1.40785	0.452	1.05801	0.91328-1.22568	0.121	1.2771	0.94866-1.71925	0.269	1.1279	0.91605-1.38875	-0.02355	0.40812	0.604	19.9882	22	0.58378	19.2756	21	0.56746
ebi-a-GCST90001547	26	0.581	1.03198	0.92417-1.1524	0.864	1.01136	0.88867-1.15099	0.454	1.03649	0.94371-1.13840	0.133	1.25849	0.94159-1.68204	0.549	1.03458	0.92702-1.15463	0.00324	0.88443	0.675	21.957	25	0.63823	21.9354	24	0.58312
ebi-a-GCST90002079	21	0.985	1.00427	0.64875-1.5546	0.833	1.03354	0.76107-1.40354	0.462	0.92316	0.74588-1.14258	0.812	1.05894	0.66420-1.68827	0.614	1.10989	0.74494-1.65363	-0.01584	0.67006	0.784	14.6871	20	0.79402	14.4998	19	0.75381
ebi-a-GCST90001749	17	0.873	0.96475	0.62678-1.4850	0.77	1.03908	0.80350-1.34373	0.463	1.07135	0.89142-1.28761	0.514	1.15576	0.75573-1.76753	0.813	1.04021	0.75465-1.43383	0.03004	0.6043	0.311	19.1839	16	0.25924	18.8321	15	0.22144
ebi-a-GCST90001457	17	0.569	0.94326	0.77478-1.1484	0.741	0.97725	0.85239-1.12040	0.463	0.94206	0.80313-1.10502	0.244	0.7832	0.52696-1.16404	0.558	0.96193	0.84710-1.09233	-0.00092	0.98173	0.097	30.6736	16	0.01481	30.6725	15	0.00971
ebi-a-GCST90001914	22	0.263	0.86763	0.68150-1.1046	0.737	0.96129	0.76322-1.21076	0.467	1.06058	0.90521-1.24260	0.902	1.02434	0.70244-1.49375	0.849	0.97739	0.77507-1.23251	0.06273	0.04314	0.574	19.3626	21	0.56189	14.6996	20	0.79333
ebi-a-GCST90001567	21	0.732	1.03851	0.83938-1.2849	0.999	1.00016	0.78978-1.26659	0.467	0.9432	0.80563-1.10426	0.871	1.03536	0.68383-1.56759	0.936	1.00869	0.81983-1.24106	-0.03343	0.20289	0.644	17.9705	20	0.58935	16.2311	19	0.64181
ebi-a-GCST90001630	24	0.496	1.12519	0.80605-1.5707	0.367	1.1283	0.86824-1.46626	0.468	1.06918	0.89243-1.28093	0.96	1.01148	0.64895-1.57654	0.507	1.12627	0.79673-1.59211	-0.01078	0.72453	0.716	19.053	23	0.69814	18.9256	22	0.64992
ebi-a-GCST90001456	18	0.822	1.04094	0.73828-1.4677	0.434	0.88624	0.65474-1.19959	0.471	1.07932	0.87713-1.32811	0.33	0.74018	0.41096-1.33315	0.321	0.74952	0.43111-1.30311	0.01092	0.79548	0.328	18.4959	17	0.35822	18.4159	16	0.30011
ebi-a-GCST90001693	28	0.462	1.03815	0.94092-1.1454	0.853	1.01075	0.90275-1.13168	0.471	1.03031	0.94992-1.11751	0.741	1.03496	0.84605-1.26605	0.708	1.01856	0.92615-1.12018	-0.00626	0.78258	0.388	29.0096	27	0.36043	28.9231	26	0.31459
ebi-a-GCST90001987	29	0.913	0.99599	0.92738-1.0697	0.96	1.00209	0.92438-1.08633	0.473	0.97657	0.91533-1.04191	0.843	1.02094	0.83273-1.25169	0.869	0.99455	0.93270-1.06050	-0.02968	0.22779	0.171	36.2317	28	0.13679	34.297	27	0.15758
ebi-a-GCST90001924	20	0.871	1.02194	0.78864-1.3243	0.817	0.97454	0.78316-1.21269	0.477	1.06121	0.90086-1.25011	0.762	1.05705	0.74242-1.50502	0.974	1.00405	0.79348-1.27049	0.01371	0.71272	0.074	27.6792	19	0.0898	27.4657	18	0.07067
ebi-a-GCST90001872	20	0.38	1.05304	0.94100-1.1784	0.612	0.97262	0.87358-1.08288	0.478	0.97066	0.89402-1.05388	0.99	0.99875	0.82851-1.20397	0.67	0.97996	0.89405-1.07412	-0.05855	0.06782	0.307	23.3835	19	0.22087	19.3292	18	0.37182
ebi-a-GCST90001802	31	0.125	1.22168	0.95300-1.5661	0.134	1.17029	0.95271-1.43756	0.481	1.05019	0.91645-1.20346	0.321	1.21339	0.83353-1.76637	0.077	1.22328	0.98572-1.51809	-0.04347	0.16696	0.353	32.3115	30	0.35318	30.2176	29	0.4032
ebi-a-GCST90001394	23	0.925	0.99505	0.89883-1.1016	0.599	0.97026	0.86704-1.08576	0.483	0.96948	0.88912-1.05709	0.515	0.94354	0.79428-1.12085	0.685	0.97857	0.88240-1.08521	-0.02384	0.35051	0.992	9.33486	22	0.9914	8.42308	21	0.99307
ebi-a-GCST90001730	22	0.832	0.98383	0.84801-1.1414	0.861	1.01528	0.85713-1.20261	0.483	0.95943	0.85462-1.07709	0.044	0.69322	0.49588-0.96909	0.798	1.01998	0.87794-1.18501	-0.01524	0.60324	0.614	18.2787	21	0.6313	17.9999	20	0.58742
ebi-a-GCST90001644	35	0.168	0.83697	0.65359-1.0718	0.306	0.88876	0.70928-1.11367	0.484	0.95074	0.82525-1.09530	0.214	1.36286	0.84419-2.20021	0.249	0.82282	0.59385-1.14008	0.03222	0.22835	0.391	35.7522	34	0.38608	34.1913	33	0.41027
ebi-a-GCST90001539	25	0.442	1.17977	0.77940-1.7858	0.258	1.17499	0.88865-1.55359	0.484	1.07382	0.87952-1.31105	0.475	0.81405	0.46688-1.41937	0.489	1.14956	0.77929-1.69576	-0.01951	0.61487	0.263	28.1582	24	0.25342	27.8432	23	0.22177
ebi-a-GCST90001746	22	0.832	1.03659	0.74639-1.4396	0.69	0.94245	0.70426-1.26120	0.485	1.07149	0.88258-1.30082	0.161	1.44454	0.87969-2.37208	0.646	0.92256	0.65706-1.29533	0.00942	0.80908	0.792	15.4519	21	0.79962	15.3919	20	0.75356
ebi-a-GCST90001508	32	0.995	0.99977	0.92903-1.0759	0.74	1.01499	0.92951-1.10833	0.486	0.97807	0.91894-1.04101	0.378	0.93158	0.79759-1.08807	0.881	1.00585	0.93227-1.08523	-0.02617	0.2749	0.746	24.8251	31	0.77549	23.5882	30	0.79033
ebi-a-GCST90001533	18	0.584	0.93017	0.72138-1.1994	0.483	0.93563	0.77704-1.12658	0.486	0.95359	0.83428-1.08997	0.766	1.04836	0.77148-1.42461	0.666	0.95658	0.78445-1.16648	0.00848	0.82452	0.869	11.0623	17	0.85331	11.0115	16	0.80877
ebi-a-GCST90001670	20	0.255	0.83364	0.61542-1.1293	0.1	0.81454	0.63801-1.03991	0.487	0.93327	0.76822-1.13379	0.3	0.80134	0.53326-1.20418	0.109	0.80134	0.61880-1.03773	0.04143	0.35382	0.128	25.8977	19	0.13306	24.6568	18	0.13466
ebi-a-GCST90002016	18	0.035	0.78474	0.63861-0.9643	0.129	0.8608	0.70922-1.04476	0.488	0.95051	0.82359-1.09700	0.254	0.8139	0.57843-1.14524	0.14	0.87255	0.73430-1.03682	0.07711	0.02468	0.446	17.9054	17	0.39483	11.7583	16	0.76044
ebi-a-GCST90001478	18	0.933	0.98277	0.65867-1.4663	0.494	0.90383	0.67629-1.20793	0.489	0.92279	0.73492-1.15867	0.886	0.96402	0.58827-1.57979	0.821	0.96402	0.70487-1.31845	-0.01993	0.70898	0.095	25.5143	17	0.08378	25.2861	16	0.06494
ebi-a-GCST90001458	20	0.28	0.91708	0.78750-1.0680	0.294	0.91383	0.77230-1.08130	0.489	0.96023	0.85584-1.07735	0.631	1.07596	0.80162-1.44419	0.244	0.91332	0.78777-1.05889	0.02886	0.37852	0.986	7.54347	19	0.9907	6.72831	18	0.99222
ebi-a-GCST90001503	30	0.622	0.98383	0.92274-1.0490	0.133	0.9441	0.87578-1.01774	0.491	0.98091	0.92857-1.03621	0.848	1.01064	0.90772-1.12523	0.133	0.94759	0.88502-1.01458	-0.00428	0.85522	0.428	30.4204	29	0.39325	30.3836	28	0.34512
ebi-a-GCST90002009	26	0.415	0.93505	0.79777-1.0960	0.804	0.98032	0.83761-1.14735	0.491	0.962	0.86155-1.07416	0.99	0.99842	0.78383-1.27176	0.654	0.9626	0.81655-1.13478	0.01484	0.63033	0.803	19.554	25	0.76981	19.3164	24	0.73491
ebi-a-GCST90002003	18	0.728	1.05192	0.79450-1.3927	0.521	0.90911	0.67967-1.21599	0.492	0.9351	0.77207-1.13254	0.799	1.0627	0.66976-1.68615	0.584	0.92116	0.69045-1.22895	-0.0406	0.27722	0.566	16.1252	17	0.51498	14.8597	16	0.53494
ebi-a-GCST90001500	27	0.556	1.05584	0.88333-1.2621	0.21	1.11736	0.93926-1.32924	0.493	1.04594	0.91990-1.18924	0.33	1.16698	0.86029-1.58300	0.236	1.10965	0.93801-1.31269	-0.00457	0.88007	0.23	30.994	26	0.22849	30.9652	25	0.19017
ebi-a-GCST90001447	24	0.253	1.19857	0.88562-1.6221	0.535	1.07647	0.85307-1.35836	0.494	1.06611	0.88733-1.28092	0.99	1.00236	0.68735-1.46175	0.427	1.10492	0.86760-1.40716	-0.04827	0.34984	0.136	31.4175	23	0.11288	30.1664	22	0.11448
ebi-a-GCST90002018	18	0.827	0.97027	0.74305-1.2670	0.262	0.8816	0.70722-1.09898	0.496	0.93757	0.77892-1.12853	0.521	0.86329	0.55616-1.34004	0.303	0.88951	0.71657-1.10419	-0.01434	0.72403	0.089	27.7216	17	0.0483	27.4996	16	0.03625
ebi-a-GCST90001540	26	0.747	1.05211	0.77532-1.4277	0.718	0.95727	0.75522-1.21336	0.5	0.94317	0.79575-1.11790	0.365	0.82949	0.55784-1.23342	0.647	0.92664	0.67168-1.27837	-0.0294	0.40653	0.936	15.6735	25	0.9242	14.9597	24	0.92193
ebi-a-GCST90001655	24	0.155	1.18531	0.94528-1.4863	0.584	1.06636	0.84750-1.34175	0.501	1.05444	0.90346-1.23065	0.965	0.99109	0.66707-1.47251	0.535	1.07054	0.86603-1.32335	-0.04173	0.17925	0.787	18.8183	23	0.71172	16.8937	22	0.7692
ebi-a-GCST90002002	16	0.763	1.0574	0.74082-1.5093	0.331	0.86313	0.64152-1.16129	0.501	0.93016	0.75315-1.14876	0.47	0.85092	0.55500-1.30463	0.432	0.876	0.63507-1.20833	-0.04096	0.39511	0.67	12.5063	15	0.64037	11.7366	14	0.62744
ebi-a-GCST90001786	21	0.588	1.12098	0.74642-1.6835	0.79	0.96256	0.72667-1.27502	0.501	1.07314	0.87352-1.31838	0.998	0.99954	0.66850-1.49453	0.937	0.9844	0.66908-1.44833	-0.01004	0.80847	0.38	21.9607	20	0.34265	21.8911	19	0.28971
ebi-a-GCST90001549	31	0.639	1.07889	0.78857-1.4761	0.923	0.98828	0.77797-1.25545	0.503	0.94536	0.80204-1.11430	0.856	0.96079	0.62531-1.47627	0.996	0.99927	0.73302-1.36222	-0.03173	0.33995	0.539	29.048	30	0.51508	28.1066	29	0.51222
ebi-a-GCST90001864	23	0.098	1.23221	0.97291-1.5606	0.305	1.09795	0.91844-1.31254	0.503	0.95703	0.84157-1.08833	0.705	0.93454	0.66137-1.32053	0.634	1.04694	0.86903-1.26128	-0.09158	0.02083	0.383	21.9899	22	0.46049	15.7456	21	0.78377
ebi-a-GCST90001808	29	0.05	1.31894	1.01201-1.7190	0.361	1.09445	0.90167-1.32844	0.504	1.04814	0.91325-1.20295	0.918	1.02109	0.68817-1.51507	0.333	1.11601	0.89699-1.38851	-0.0809	0.06066	0.333	31.1582	28	0.3101	27.2848	27	0.44851
ebi-a-GCST90001707	20	0.541	0.95283	0.81837-1.1094	0.272	0.92882	0.81418-1.05959	0.505	0.96601	0.87265-1.06937	0.768	1.04269	0.79253-1.37182	0.538	0.95867	0.84027-1.09376	0.00965	0.81465	0.569	17.4948	19	0.55638	17.4382	18	0.49319
ebi-a-GCST90001493	29	0.602	0.9663	0.85092-1.0973	0.381	0.94378	0.82925-1.07412	0.506	0.96714	0.87640-1.06727	0.395	0.88858	0.67979-1.16149	0.364	0.95131	0.85564-1.05769	0.00055	0.98287	0.38	30.9682	28	0.31849	30.9676	27	0.27247
ebi-a-GCST90002035	25	0.899	1.01597	0.79700-1.2951	0.694	1.04116	0.85166-1.27282	0.507	1.05278	0.90440-1.22550	0.102	1.28876	0.96227-1.72603	0.777	1.03224	0.83077-1.28256	0.01122	0.7159	0.937	15.1661	24	0.91581	15.0303	23	0.89354
ebi-a-GCST90001810	18	0.106	0.76986	0.57050-1.0389	0.231	0.87085	0.69456-1.09188	0.508	0.94637	0.80376-1.11429	0.485	0.85876	0.56559-1.30392	0.201	0.81044	0.59474-1.10437	0.07127	0.12997	0.365	17.7316	17	0.40596	15.1832	16	0.51126
ebi-a-GCST90001468	15	0.296	0.86421	0.66450-1.1239	0.402	0.9182	0.75220-1.12082	0.509	0.94615	0.80276-1.11516	0.543	0.8894	0.61553-1.28512	0.42	0.91465	0.74116-1.12874	0.03561	0.40223	0.905	8.27139	14	0.87471	7.52155	13	0.87331
ebi-a-GCST90002015	18	0.042	0.79352	0.64607-0.9746	0.147	0.87259	0.72591-1.04891	0.51	0.95322	0.82662-1.09920	0.396	0.85479	0.60031-1.21714	0.153	0.87475	0.73418-1.04224	0.07039	0.03052	0.434	17.8705	17	0.39705	12.2399	16	0.72731
ebi-a-GCST90001685	16	0.47	1.25548	0.68887-2.2882	0.898	1.02351	0.71682-1.46140	0.512	1.08537	0.84987-1.38613	0.653	0.8708	0.48191-1.57352	0.97	1.01017	0.60088-1.69825	-0.03019	0.60896	0.421	15.6276	15	0.40722	15.3278	14	0.35612
ebi-a-GCST90001988	21	0.133	1.21727	0.95256-1.5555	0.169	1.13388	0.94809-1.35608	0.512	1.04792	0.91105-1.20535	0.587	1.0905	0.80181-1.48312	0.206	1.11651	0.94639-1.31721	-0.05987	0.16596	0.428	21.1501	20	0.38834	19.0673	19	0.45253
ebi-a-GCST90001803	13	0.673	0.73712	0.18535-2.9315	0.257	1.25885	0.84533-1.87467	0.514	1.1069	0.81602-1.50148	0.344	1.35024	0.74285-2.45426	0.289	1.35024	0.79442-2.29494	0.06347	0.56536	0.426	12.7696	12	0.38601	12.3744	11	0.33617
ebi-a-GCST90001968	19	0.908	1.02795	0.64808-1.6305	0.284	1.18498	0.86861-1.61659	0.515	1.07995	0.85689-1.36108	0.116	1.69426	0.90555-3.16990	0.159	1.55903	0.86185-2.82018	0.01305	0.80966	0.138	24.6804	18	0.13398	24.5938	17	0.10418
ebi-a-GCST90001407	16	0.473	0.93129	0.77079-1.1252	0.415	0.91643	0.74305-1.13026	0.515	0.9516	0.81949-1.10501	0.592	0.90739	0.64065-1.28519	0.489	0.93281	0.76955-1.13070	0.01108	0.7208	0.593	13.9198	15	0.53162	13.7868	14	0.46571
ebi-a-GCST90001985	27	0.925	1.00513	0.90410-1.1175	0.91	1.00601	0.90688-1.11597	0.517	1.0274	0.94677-1.11490	0.658	1.05063	0.84635-1.30421	0.927	1.00417	0.91996-1.09609	0.01983	0.52268	0.161	33.7069	26	0.14256	33.1495	25	0.12737
ebi-a-GCST90001918	18	0.586	1.06619	0.85047-1.3366	0.616	1.05402	0.85802-1.29480	0.517	1.05086	0.90434-1.22112	0.922	0.98432	0.72120-1.34345	0.487	1.06856	0.88993-1.28304	-0.00731	0.86542	0.424	18.3028	17	0.36998	18.2689	16	0.30839
ebi-a-GCST90001483	28	0.854	0.98684	0.85848-1.1344	0.119	1.12843	0.96948-1.31345	0.517	1.03526	0.93216-1.14977	0.343	1.15367	0.86281-1.54258	0.155	1.11147	0.96458-1.28072	0.034	0.31594	0.337	29.7542	27	0.32531	28.6039	26	0.3294
ebi-a-GCST90001406	28	0.634	1.0596	0.83720-1.3411	0.514	1.07834	0.85984-1.35237	0.519	1.05094	0.90364-1.22227	0.687	1.08711	0.72770-1.62403	0.48	1.08711	0.86492-1.36638	-0.00267	0.92886	0.49	27.3317	27	0.44601	27.3231	26	0.39254
ebi-a-GCST90001842	27	0.964	1.00393	0.84617-1.1911	0.731	0.97369	0.83658-1.13328	0.519	0.96282	0.85808-1.08034	0.791	0.9621	0.72506-1.27663	0.803	0.98203	0.85316-1.13037	-0.01912	0.51852	0.141	32.8502	26	0.16649	32.2962	25	0.14962
ebi-a-GCST90001977	17	0.85	1.02329	0.80878-1.2947	0.531	1.07019	0.86545-1.32337	0.52	1.05646	0.89380-1.24872	0.391	1.15582	0.83766-1.59482	0.731	1.04308	0.82324-1.32163	0.01352	0.71082	0.964	8.05178	16	0.94731	7.909	15	0.92738
ebi-a-GCST90001740	26	0.72	1.05643	0.78543-1.4209	0.781	1.03592	0.80810-1.32796	0.521	1.05683	0.89255-1.25135	0.733	0.92459	0.59193-1.44418	0.798	0.94548	0.61836-1.44564	0.00011	0.99756	0.683	20.4695	25	0.72179	20.4695	24	0.66979
ebi-a-GCST90001463	23	0.543	0.9563	0.83015-1.1016	0.259	0.92107	0.79852-1.06242	0.525	0.96602	0.86827-1.07476	0.676	0.95527	0.77296-1.18058	0.296	0.92877	0.81126-1.06331	0.0064	0.83322	0.956	12.8833	22	0.93637	12.8378	21	0.9142
ebi-a-GCST90001927	22	0.365	1.13978	0.86408-1.5035	0.35	1.1211	0.88214-1.42480	0.526	1.05621	0.89194-1.25074	0.83	1.04602	0.69756-1.56854	0.294	1.14389	0.89530-1.46152	-0.02133	0.50074	0.319	24.491	21	0.26988	23.9284	20	0.24553
ebi-a-GCST90002048	16	0.391	0.85812	0.61151-1.2042	0.179	0.85153	0.67374-1.07623	0.526	0.9362	0.76350-1.14797	0.362	0.81608	0.53438-1.24628	0.118	0.81608	0.64198-1.03740	0.03892	0.53358	0.048	25.5317	15	0.04324	24.8097	14	0.03649
ebi-a-GCST90001710	23	0.518	0.94239	0.78964-1.1247	0.257	0.92438	0.80675-1.05915	0.527	0.95919	0.84293-1.09148	0.818	1.04303	0.73166-1.48691	0.522	0.95097	0.81736-1.10642	0.00975	0.77158	0.203	29.4724	22	0.13186	29.3515	21	0.10581
ebi-a-GCST90001813	24	0.486	0.91066	0.70311-1.1795	0.918	1.01192	0.80796-1.26736	0.527	1.05615	0.89152-1.25119	0.633	1.09471	0.75874-1.57945	0.963	0.9929	0.73792-1.33598	0.05788	0.1581	0.162	29.5502	23	0.16276	26.9361	22	0.21366
ebi-a-GCST90001676	7	0.777	0.86586	0.33749-2.2214	0.551	0.85762	0.51796-1.42003	0.528	0.87818	0.58680-1.31425	0.983	0.99177	0.48465-2.02952	0.765	0.89177	0.43546-1.82622	0.00248	0.97474	0.365	6.91436	6	0.32884	6.91283	5	0.2272
ebi-a-GCST90001479	15	0.236	0.77445	0.51731-1.1594	0.351	0.86964	0.64850-1.16619	0.528	0.92126	0.71402-1.18865	0.361	0.78116	0.46797-1.30393	0.247	0.8351	0.62362-1.11831	0.05039	0.29842	0.066	24.2585	14	0.04263	22.2505	13	0.0516
ebi-a-GCST90001427	28	0.496	1.13797	0.78856-1.6422	0.861	1.02456	0.78159-1.34306	0.528	0.93423	0.75611-1.15431	0.922	0.9779	0.62814-1.52242	0.846	1.03133	0.75815-1.40295	-0.04419	0.21081	0.09	38.7511	27	0.06673	36.4438	26	0.0838
ebi-a-GCST90001825	18	0.78	1.02379	0.87075-1.2037	0.764	1.02379	0.87791-1.19391	0.529	1.04025	0.91993-1.17631	0.863	1.03217	0.72394-1.47162	0.837	1.01563	0.87820-1.17457	0.00877	0.76928	0.613	16.2129	17	0.50879	16.1232	16	0.44439
ebi-a-GCST90001866	15	0.674	1.08933	0.73748-1.6090	0.443	1.09436	0.86939-1.37754	0.531	1.05682	0.88897-1.25635	0.78	0.94291	0.62956-1.41224	0.571	1.09061	0.81344-1.46224	-0.00908	0.86776	0.566	12.8921	14	0.53504	12.8632	13	0.45843
ebi-a-GCST90001528	24	0.182	0.90203	0.77895-1.0445	0.322	0.93453	0.81744-1.06840	0.532	0.97218	0.88983-1.06216	0.4	0.8969	0.69939-1.15019	0.154	0.8929	0.76799-1.03812	0.04018	0.22267	0.601	19.7481	23	0.65706	18.1732	22	0.69567
ebi-a-GCST90001474	22	0.859	1.02004	0.82144-1.2667	0.278	1.09947	0.92650-1.30473	0.532	1.05047	0.90000-1.22608	0.315	1.22709	0.83128-1.81136	0.261	1.09199	0.94041-1.26800	0.01309	0.70171	0.053	35.0446	21	0.02792	34.7821	20	0.0213
ebi-a-GCST90001672	23	0.26	0.88666	0.72336-1.0868	0.503	0.93549	0.76957-1.13720	0.535	0.95625	0.83030-1.10130	0.248	0.82352	0.59754-1.13496	0.243	0.88394	0.72257-1.08134	0.03788	0.32408	0.273	25.7305	22	0.26343	24.5389	21	0.26768
ebi-a-GCST90002042	18	0.67	1.12452	0.66158-1.9114	0.602	1.06364	0.84354-1.34118	0.536	1.05296	0.89414-1.23998	0.642	1.09717	0.74731-1.61083	0.582	1.10684	0.77620-1.57832	-0.01606	0.80169	0.692	13.7176	17	0.68698	13.6524	16	0.62459
ebi-a-GCST90001885	25	0.989	0.99879	0.84395-1.1820	0.578	0.9466	0.78017-1.14853	0.538	0.96205	0.85046-1.08827	0.5	0.89643	0.65570-1.22556	0.931	0.99054	0.80160-1.22403	-0.01687	0.52854	0.907	14.5146	24	0.93416	14.1051	23	0.92382
ebi-a-GCST90001586	23	0.615	1.03428	0.90873-1.1772	0.651	1.03355	0.89582-1.19245	0.539	1.03444	0.92861-1.15233	0.611	1.06174	0.84574-1.33291	0.596	1.03543	0.91218-1.17534	0.00012	0.99661	0.976	11.1215	22	0.97297	11.1214	21	0.96037
ebi-a-GCST90001649	23	0.953	1.00707	0.80015-1.2675	0.56	1.0635	0.86448-1.30834	0.541	0.95712	0.83170-1.10145	0.163	0.70742	0.44227-1.13154	0.389	1.10727	0.88230-1.38962	-0.01673	0.58985	0.572	19.4408	22	0.61798	19.1411	21	0.57609
ebi-a-GCST90002105	22	0.472	0.95603	0.84769-1.0782	0.19	0.92326	0.81941-1.04027	0.545	0.97468	0.89708-1.05899	0.622	1.05666	0.85172-1.31092	0.23	0.9313	0.83195-1.04252	0.01268	0.66838	0.647	16.8709	21	0.7189	16.6819	20	0.67353
ebi-a-GCST90002074	24	0.634	1.06266	0.83002-1.3605	0.433	1.08329	0.88679-1.32333	0.546	1.0478	0.90056-1.21911	0.863	0.96851	0.67685-1.38586	0.569	1.06609	0.85798-1.32469	-0.00451	0.88737	0.366	25.8514	23	0.30793	25.8273	22	0.25917
ebi-a-GCST90001603	19	0.485	0.88519	0.63353-1.2368	0.561	1.09464	0.80681-1.48515	0.551	1.06059	0.87415-1.28680	0.733	0.92172	0.58128-1.46154	0.928	0.98435	0.70169-1.38087	0.04571	0.2116	0.714	14.5841	18	0.6903	12.8991	17	0.74291
ebi-a-GCST90001948	21	0.724	1.02947	0.87827-1.2067	0.677	0.97796	0.88056-1.08615	0.553	0.97065	0.87975-1.07093	0.112	0.77087	0.56732-1.04745	0.738	0.98135	0.88020-1.09413	-0.03203	0.36587	0.297	24.7683	20	0.21044	23.698	19	0.20799
ebi-a-GCST90001521	24	0.643	0.95611	0.79301-1.1528	0.499	0.94147	0.79058-1.12116	0.555	0.96419	0.85424-1.08829	0.534	0.89911	0.64616-1.25108	0.313	0.86873	0.66490-1.13505	0.00325	0.909	0.838	15.6185	23	0.87111	15.6051	22	0.83499
ebi-a-GCST90002040	31	0.85	1.02676	0.78311-1.3462	0.075	1.20168	0.98133-1.47152	0.557	1.05036	0.89167-1.23729	0.404	1.16796	0.81544-1.67288	0.144	1.19375	0.94746-1.50408	0.00743	0.83635	0.031	49.029	30	0.01561	48.9557	29	0.01167
ebi-a-GCST90001847	26	0.238	1.0962	0.94473-1.2720	0.725	1.02893	0.87758-1.20639	0.558	1.03365	0.92526-1.15474	0.24	1.20806	0.88786-1.64373	0.473	1.05357	0.91551-1.21244	-0.02923	0.26085	0.44	26.373	25	0.38791	24.9921	24	0.40619
ebi-a-GCST90001391	17	0.755	0.96236	0.75984-1.2189	0.574	0.93896	0.75365-1.16984	0.56	0.95447	0.81587-1.11661	0.789	1.04863	0.74431-1.47739	0.643	0.94622	0.75241-1.18996	-0.00343	0.92839	0.585	14.3816	16	0.57031	14.3733	15	0.49743
ebi-a-GCST90001827	18	0.738	1.16538	0.48255-2.8144	0.984	0.99623	0.68790-1.44276	0.564	0.91165	0.66606-1.24778	0.809	1.08147	0.57866-2.02119	0.787	1.07127	0.65505-1.75197	-0.04432	0.56617	0.03	29.6355	17	0.0291	29.0132	16	0.02385
ebi-a-GCST90001995	24	0.766	1.05632	0.73925-1.5094	0.409	0.9081	0.72225-1.14178	0.564	0.9525	0.80737-1.12373	0.862	1.04341	0.64958-1.67603	0.335	0.88083	0.68423-1.13393	-0.03125	0.52666	0.193	28.2624	23	0.20602	27.7405	22	0.18444
ebi-a-GCST90001595	7	0.783	0.84394	0.26828-2.6549	0.991	0.99701	0.58230-1.70709	0.565	0.88718	0.59026-1.33346	0.81	0.91157	0.44199-1.88004	0.921	1.02935	0.59384-1.78425	0.00928	0.93069	0.615	5.01723	6	0.54161	5.00885	5	0.4148
ebi-a-GCST90001451	24	0.425	1.16412	0.80698-1.6793	0.433	0.91381	0.72953-1.14462	0.566	0.95457	0.81447-1.11877	0.605	1.11328	0.74516-1.66323	0.322	0.85823	0.63849-1.15360	-0.05202	0.25234	0.409	24.427	23	0.38049	22.9833	22	0.40267
ebi-a-GCST90001946	19	0.692	1.03141	0.88729-1.1989	0.637	0.97426	0.87423-1.08575	0.568	0.97208	0.88212-1.07122	0.96	0.99315	0.76269-1.29324	0.694	0.97847	0.87951-1.08857	-0.03447	0.32693	0.329	21.682	18	0.24641	20.4559	17	0.25158
ebi-a-GCST90001935	16	0.297	1.31447	0.80110-2.1568	0.613	1.0843	0.79271-1.48314	0.569	1.0797	0.82922-1.40583	0.493	0.83366	0.50167-1.38534	0.314	1.21052	0.84478-1.73459	-0.05138	0.37204	0.095	23.6871	15	0.0706	22.3305	14	0.07207
ebi-a-GCST90001469	24	0.148	0.88921	0.76261-1.0368	0.274	0.92113	0.79497-1.06732	0.571	0.96889	0.86857-1.08079	0.55	0.93324	0.74661-1.16652	0.336	0.93846	0.82672-1.06530	0.04723	0.13327	0.603	21.4924	23	0.55104	19.062	22	0.6415
ebi-a-GCST90001487	29	0.133	0.87037	0.73019-1.0375	0.224	0.89239	0.74264-1.07235	0.571	0.96382	0.84835-1.09500	0.393	1.14429	0.84399-1.55143	0.184	0.86845	0.70894-1.06383	0.04375	0.10918	0.572	25.3811	28	0.60702	22.6368	27	0.70436
ebi-a-GCST90002075	11	0.129	1.76784	0.90649-3.4477	0.623	1.10277	0.74687-1.62825	0.572	1.08316	0.82110-1.42885	0.551	1.2357	0.63084-2.42050	0.607	1.17929	0.64214-2.16577	-0.11485	0.14997	0.419	10.3731	10	0.40839	7.89604	9	0.54466
ebi-a-GCST90002077	28	0.193	1.09168	0.96001-1.2414	0.215	1.08758	0.95242-1.24193	0.576	1.02798	0.93316-1.13243	0.663	0.95239	0.76658-1.18324	0.255	1.0756	0.95132-1.21612	-0.03366	0.17536	0.797	22.0144	27	0.73664	20.0735	26	0.78806
ebi-a-GCST90001738	21	0.579	1.09064	0.80710-1.4738	0.758	1.04953	0.77186-1.42710	0.577	0.94161	0.76239-1.16296	0.32	0.76579	0.45837-1.27942	0.511	1.12819	0.79260-1.60586	-0.05047	0.20282	0.225	23.8438	20	0.24928	21.8434	19	0.29212
ebi-a-GCST90001517	30	0.968	1.00165	0.92423-1.0855	0.905	1.00588	0.91342-1.10770	0.577	1.01912	0.95354-1.08920	0.821	0.98303	0.84897-1.13826	0.948	1.00268	0.92557-1.08622	0.01612	0.46017	0.727	25.8899	29	0.63137	25.3291	28	0.60987
ebi-a-GCST90002069	22	0.434	1.09231	0.87939-1.3568	0.47	1.06986	0.89060-1.28521	0.578	0.95689	0.81940-1.11744	0.889	0.97816	0.72054-1.32790	0.667	1.04158	0.86758-1.25048	-0.05821	0.1149	0.068	32.174	21	0.05622	28.3258	20	0.10191
ebi-a-GCST90001600	11	0.44	0.83665	0.54300-1.2891	0.953	0.99079	0.73074-1.34339	0.58	0.94333	0.76732-1.15970	0.315	0.76597	0.46738-1.25532	0.843	0.96791	0.70691-1.32527	0.07111	0.55106	0.516	8.97007	10	0.53495	8.58653	9	0.47628
ebi-a-GCST90001678	24	0.259	1.10557	0.93299-1.3101	0.826	1.02144	0.84500-1.23472	0.58	1.03708	0.91168-1.17972	0.798	1.04269	0.75993-1.43066	0.725	1.0307	0.87266-1.21735	-0.03192	0.26856	0.926	14.354	23	0.91628	13.0656	22	0.93132
ebi-a-GCST90002090	25	0.74	1.05105	0.78620-1.4051	0.293	1.13213	0.89851-1.42650	0.58	1.04506	0.89396-1.22169	0.454	1.17771	0.77275-1.79490	0.316	1.15599	0.87583-1.52578	-0.00156	0.96351	0.404	24.8884	24	0.41184	24.8861	23	0.35618
ebi-a-GCST90001501	22	0.749	0.98596	0.90523-1.0739	0.665	0.98034	0.89600-1.07261	0.581	0.98054	0.91444-1.05142	0.946	1.00439	0.88609-1.13849	0.677	0.98048	0.89467-1.07453	-0.00795	0.82021	0.372	23.492	21	0.31832	23.4299	20	0.26818
ebi-a-GCST90001913	16	0.813	1.03977	0.75751-1.4272	0.847	0.97223	0.73052-1.29391	0.582	0.9486	0.78630-1.14440	0.946	0.98432	0.62565-1.54861	0.986	1.00325	0.70807-1.42147	-0.02796	0.48844	0.453	15.0299	15	0.44927	14.5054	14	0.41278
ebi-a-GCST90001819	24	0.284	0.87006	0.67861-1.1155	0.712	0.96106	0.77861-1.18627	0.583	1.04656	0.88971-1.23106	0.961	0.98986	0.66170-1.48076	0.304	0.8825	0.69911-1.11399	0.07113	0.07654	0.148	29.5258	23	0.1635	25.5194	22	0.27289
ebi-a-GCST90001669	34	0.903	0.9974	0.95676-1.0398	0.325	1.0256	0.97522-1.07858	0.583	1.01055	0.97339-1.04914	0.972	1.0012	0.93799-1.06866	0.52	1.01402	0.97234-1.05749	0.03337	0.18605	0.379	35.4424	33	0.35375	33.5288	32	0.39309
ebi-a-GCST90001462	17	0.874	1.0086	0.90925-1.1188	0.687	1.02351	0.91427-1.14581	0.584	0.97569	0.89345-1.06551	0.711	0.95258	0.74014-1.22600	0.937	1.00381	0.91445-1.10190	-0.0411	0.25366	0.544	14.8769	16	0.53367	13.4678	15	0.56622
ebi-a-GCST90002022	22	0.083	0.74173	0.53797-1.0227	0.5	0.92716	0.74442-1.15476	0.587	0.95774	0.81958-1.11920	0.755	0.9397	0.63922-1.38142	0.588	0.91401	0.66343-1.25924	0.06486	0.08969	0.89	13.5092	21	0.88975	10.3284	20	0.96182
ebi-a-GCST90001991	21	0.164	1.20722	0.93576-1.5574	0.165	1.13677	0.94863-1.36222	0.588	1.041	0.90021-1.20381	0.582	1.08468	0.81574-1.44229	0.193	1.11878	0.95029-1.31715	-0.05618	0.18547	0.34	22.1397	20	0.33298	20.1391	19	0.38626
ebi-a-GCST90001821	25	0.712	0.92373	0.60945-1.4001	0.456	1.10688	0.84770-1.44530	0.594	0.94542	0.76929-1.16188	0.346	1.23986	0.79985-1.92194	0.507	1.13053	0.79127-1.61524	0.00528	0.90017	0.097	34.0944	24	0.083	34.0706	23	0.06414
ebi-a-GCST90002000	26	0.655	0.97155	0.85747-1.1008	0.611	0.96341	0.83459-1.11211	0.595	0.97262	0.87799-1.07746	0.892	1.02819	0.69019-1.53172	0.561	0.96631	0.86219-1.08300	0.0008	0.97586	0.572	24.2491	25	0.50502	24.2482	24	0.44748
ebi-a-GCST90002011	12	0.52	1.21131	0.68954-2.1279	0.941	0.98577	0.67410-1.44155	0.597	0.92855	0.70537-1.22234	0.742	1.11712	0.58667-2.12721	0.53	1.22283	0.66601-2.24518	-0.05789	0.31433	0.522	9.88537	11	0.54073	8.76304	10	0.55473
ebi-a-GCST90001419	19	0.334	1.14299	0.87805-1.4879	0.328	1.14217	0.87527-1.49045	0.597	1.04834	0.87998-1.24890	0.44	1.22509	0.74030-2.02737	0.252	1.16191	0.90643-1.48940	-0.02975	0.40225	0.606	16.2427	18	0.57561	15.5047	17	0.55918
ebi-a-GCST90001891	12	0.72	0.892	0.48624-1.6364	0.508	0.90867	0.68416-1.20687	0.599	0.92799	0.70252-1.22583	0.47	0.83361	0.51728-1.34339	0.562	0.90705	0.65900-1.24846	0.00982	0.88705	0.078	19.7202	11	0.04933	19.6785	10	0.03244
ebi-a-GCST90001424	17	0.826	0.98104	0.82923-1.1606	0.945	1.00612	0.84592-1.19667	0.601	1.03711	0.90483-1.18874	0.998	0.9995	0.70668-1.41365	0.995	0.9995	0.84574-1.18121	0.03207	0.28474	0.727	13.0698	16	0.66765	11.8391	15	0.69117
ebi-a-GCST90002085	21	0.442	0.90494	0.70526-1.1611	0.553	0.93473	0.74777-1.16844	0.602	0.95731	0.81266-1.12770	0.687	0.9361	0.68203-1.28481	0.423	0.89603	0.68876-1.16567	0.02016	0.56427	0.998	6.9965	20	0.9967	6.65221	19	0.99585
ebi-a-GCST90001763	22	0.21	1.13366	0.93764-1.3707	0.077	1.17628	0.98274-1.40793	0.602	1.0377	0.90288-1.19264	0.267	1.22088	0.86616-1.72086	0.124	1.15999	0.96730-1.39107	-0.03873	0.20275	0.287	24.236	21	0.28176	22.3021	20	0.32435
ebi-a-GCST90001912	13	0.902	1.01772	0.77336-1.3393	0.568	0.93282	0.73478-1.18424	0.603	0.95064	0.78540-1.15065	1	0.99988	0.60731-1.64621	0.587	0.93643	0.74348-1.17945	-0.02734	0.50317	0.446	13.2826	12	0.34884	12.7282	11	0.31146
ebi-a-GCST90001414	18	0.321	0.83669	0.59497-1.1766	0.158	0.80793	0.60075-1.08655	0.607	0.94825	0.77439-1.16114	0.642	0.88833	0.54405-1.45048	0.272	0.82245	0.58688-1.15258	0.03862	0.38434	0.592	14.9353	17	0.60014	14.1352	16	0.58864
ebi-a-GCST90001967	24	0.77	0.96468	0.76032-1.2240	0.809	0.97118	0.76621-1.23098	0.609	0.96087	0.82458-1.11969	0.539	0.89148	0.62152-1.27871	0.73	0.95723	0.74936-1.22276	-0.00141	0.96646	0.898	14.941	23	0.89674	14.9392	22	0.86483
ebi-a-GCST90002061	26	0.829	0.97223	0.75522-1.2516	0.818	0.97869	0.81459-1.17585	0.609	1.03909	0.89702-1.20366	0.825	0.96431	0.70135-1.32586	0.867	1.01594	0.84619-1.21975	0.02367	0.52911	0.172	32.6089	25	0.14114	32.064	24	0.12541
ebi-a-GCST90001953	20	0.341	0.93669	0.82156-1.0680	0.641	0.97519	0.87751-1.08374	0.609	0.97845	0.90000-1.06375	0.973	0.99575	0.78155-1.26864	0.636	0.97484	0.87874-1.08146	0.02813	0.40873	0.66	16.5102	19	0.62301	15.7947	18	0.60688
ebi-a-GCST90001783	12	0.158	1.63665	0.86891-3.0827	0.747	1.06355	0.73136-1.54662	0.612	1.07342	0.81645-1.41126	0.536	1.25041	0.62966-2.48312	0.751	1.114	0.58206-2.13206	-0.08425	0.18097	0.413	11.7002	11	0.3866	9.63218	10	0.47333
ebi-a-GCST90001605	18	0.295	1.10496	0.92216-1.3240	0.819	1.02216	0.84727-1.23315	0.615	0.96193	0.82691-1.11900	0.907	0.97434	0.63406-1.49725	0.693	1.03628	0.87062-1.23345	-0.07317	0.02534	0.368	18.9091	17	0.33377	12.8276	16	0.68532
ebi-a-GCST90001449	20	0.309	0.8401	0.60637-1.1639	0.822	1.02849	0.80543-1.31334	0.616	0.95736	0.80726-1.13537	0.611	1.1061	0.75474-1.62105	0.905	1.01853	0.75647-1.37136	0.03778	0.36892	0.685	15.7681	19	0.67269	14.9187	18	0.66754
ebi-a-GCST90001440	24	0.577	0.92568	0.70860-1.2092	0.438	0.90609	0.70616-1.16262	0.619	0.95326	0.78939-1.15114	0.593	0.89366	0.59499-1.34227	0.338	0.89366	0.71351-1.11930	0.01081	0.75917	0.092	34.6176	23	0.05674	34.4666	22	0.04401
ebi-a-GCST90002087	29	0.698	1.04864	0.82689-1.3299	0.463	0.9238	0.74742-1.14179	0.62	0.96353	0.83209-1.11574	0.459	0.86144	0.58352-1.27171	0.542	0.91666	0.69549-1.20817	-0.02675	0.38259	0.71	24.1887	28	0.67154	23.4009	27	0.6633
ebi-a-GCST90001722	20	0.142	1.27404	0.93502-1.7360	0.966	1.00617	0.75758-1.33633	0.622	1.04677	0.87305-1.25506	0.924	0.97807	0.62273-1.53617	0.996	0.99914	0.71557-1.39509	-0.06107	0.1417	0.681	14.7668	19	0.7373	12.4046	18	0.82566
ebi-a-GCST90001438	19	0.231	1.2235	0.88992-1.6821	0.099	1.25101	0.95901-1.63190	0.624	1.04997	0.86383-1.27621	0.285	1.312	0.80956-2.12627	0.173	1.29823	0.90496-1.86240	-0.04004	0.24967	0.662	15.0608	18	0.65779	13.6402	17	0.69239
ebi-a-GCST90001820	25	0.241	0.87066	0.69497-1.0908	0.15	0.85606	0.69265-1.05802	0.624	0.96462	0.83508-1.11427	0.497	1.15805	0.76324-1.75709	0.257	0.85853	0.66355-1.11082	0.03731	0.25809	0.793	17.3136	24	0.83498	15.9688	23	0.8566
ebi-a-GCST90001754	18	0.359	1.25263	0.78512-1.9985	0.366	1.14016	0.85786-1.51536	0.625	1.05171	0.85920-1.28736	0.222	0.72335	0.43816-1.19415	0.229	1.29382	0.86359-1.93838	-0.03855	0.42781	0.594	15.4207	17	0.5652	14.7588	16	0.54237
ebi-a-GCST90001398	21	0.625	1.08422	0.78803-1.4917	0.765	1.04517	0.78220-1.39655	0.625	1.05035	0.86236-1.27932	0.774	0.92656	0.55485-1.54728	0.871	1.02257	0.78403-1.33369	-0.00919	0.80387	0.385	22.2949	20	0.32472	22.2208	19	0.27341
ebi-a-GCST90001696	46	0.835	1.00043	0.99642-1.0044	0.73	0.99914	0.99425-1.00404	0.627	1.00087	0.99738-1.00437	0.84	0.9992	0.99155-1.00692	0.965	1.0001	0.99584-1.00437	0.0101	0.65659	0.287	51.0225	45	0.24884	50.7912	44	0.22363
ebi-a-GCST90001635	25	0.535	1.09967	0.81824-1.4779	0.715	0.95661	0.75426-1.21326	0.627	1.04092	0.88533-1.22385	0.488	0.86392	0.57488-1.29829	0.532	0.90419	0.66218-1.23464	-0.01618	0.66684	0.503	23.4318	24	0.49444	23.2397	23	0.44685
ebi-a-GCST90001860	27	0.603	0.95514	0.80527-1.1329	0.782	0.97826	0.83724-1.14304	0.628	0.97423	0.87651-1.08286	0.334	0.87955	0.68122-1.13561	0.883	1.0119	0.86524-1.18341	0.00897	0.77461	0.767	19.9407	26	0.79436	19.8569	25	0.75429
ebi-a-GCST90001460	29	0.13	0.87573	0.74155-1.0342	0.277	0.91187	0.77210-1.07693	0.631	0.96791	0.84730-1.10568	0.208	1.25021	0.89007-1.75606	0.406	0.92549	0.77306-1.10799	0.06065	0.07654	0.002	50.1374	28	0.00624	44.5423	27	0.01816
ebi-a-GCST90001535	29	0.142	0.85431	0.69660-1.0477	0.408	0.91583	0.74363-1.12791	0.632	1.03457	0.90041-1.18871	0.556	1.13302	0.75166-1.70786	0.356	0.91055	0.74875-1.10733	0.06339	0.0184	0.467	27.5885	28	0.48641	21.292	27	0.77242
ebi-a-GCST90002119	21	0.193	0.8318	0.63678-1.0866	0.791	0.97423	0.80322-1.18166	0.632	0.96316	0.82599-1.12312	0.419	1.1797	0.79688-1.74641	0.875	0.98283	0.79409-1.21643	0.05179	0.20781	0.07	29.5497	20	0.07749	27.1223	19	0.10184
ebi-a-GCST90001828	28	0.881	0.97443	0.69673-1.3628	0.727	0.95634	0.74436-1.22868	0.634	1.04265	0.87794-1.23825	0.851	0.95685	0.60665-1.50921	0.77	0.93999	0.62308-1.41808	0.01481	0.64903	0.894	17.7494	27	0.91099	17.5374	26	0.89195
ebi-a-GCST90001461	19	0.154	0.78752	0.57561-1.0775	0.281	0.8699	0.67530-1.12057	0.634	0.95729	0.79971-1.14592	0.378	0.83871	0.57279-1.22810	0.276	0.85935	0.65950-1.11975	0.05993	0.15446	0.865	12.2943	18	0.83168	10.0732	17	0.90051
ebi-a-GCST90001420	22	0.933	0.99369	0.85916-1.1493	0.455	1.06616	0.90130-1.26117	0.635	0.97205	0.86465-1.09278	0.757	0.94583	0.66821-1.33879	0.624	1.03881	0.89413-1.20689	-0.01533	0.62265	0.54	17.4905	21	0.68098	17.2407	20	0.63729
ebi-a-GCST90001857	21	0.498	1.06513	0.89066-1.2738	0.226	1.10391	0.94081-1.29530	0.636	0.97283	0.86800-1.09031	0.543	1.1062	0.80333-1.52324	0.484	1.06335	0.89801-1.25914	-0.04111	0.2129	0.486	18.7746	20	0.53652	17.1133	19	0.58219
ebi-a-GCST90001642	31	0.149	0.83502	0.65783-1.0599	0.211	0.86296	0.68514-1.08693	0.636	0.96491	0.83223-1.11873	0.677	0.91255	0.59583-1.39761	0.246	0.854	0.65757-1.10911	0.03609	0.14067	0.666	26.097	30	0.67017	23.8026	29	0.7386
ebi-a-GCST90002056	24	0.989	0.99787	0.73006-1.3639	0.551	1.07237	0.85241-1.34909	0.637	0.95832	0.80309-1.14356	0.297	1.28495	0.81041-2.03734	0.704	1.0672	0.76661-1.48566	-0.01241	0.75907	0.056	33.5603	23	0.07179	33.4139	22	0.05628
ebi-a-GCST90001590	23	0.183	1.16906	0.93599-1.4602	0.269	1.13328	0.90780-1.41478	0.64	1.03669	0.89133-1.20575	0.918	1.01966	0.70766-1.46923	0.252	1.12955	0.92209-1.38370	-0.03801	0.1636	0.763	16.9547	22	0.76586	14.8707	21	0.82938
ebi-a-GCST90001464	22	0.909	1.01086	0.84124-1.2147	0.589	0.95109	0.79289-1.14086	0.646	1.03107	0.90486-1.17488	0.624	0.91909	0.65908-1.28168	0.898	0.987	0.80957-1.20331	0.01021	0.76697	0.793	15.4107	21	0.80179	15.3205	20	0.75779
ebi-a-GCST90002070	31	0.851	0.987	0.86232-1.1297	0.586	1.04067	0.90147-1.20136	0.646	1.02418	0.92479-1.13425	0.499	1.08993	0.85179-1.39465	0.942	0.99506	0.87080-1.13705	0.02279	0.41582	0.174	36.8267	30	0.18225	35.9812	29	0.17411
ebi-a-GCST90001822	24	0.702	0.9387	0.68181-1.2924	0.572	0.92778	0.71561-1.20287	0.647	0.95832	0.79856-1.15004	0.588	0.89273	0.59582-1.33761	0.501	0.90969	0.69347-1.19332	0.00539	0.87738	0.291	27.1516	23	0.24957	27.1215	22	0.20665
ebi-a-GCST90001582	27	0.948	0.99445	0.84205-1.1744	0.309	1.09926	0.91590-1.31933	0.649	1.03079	0.90450-1.17472	0.428	1.1766	0.79226-1.74740	0.31	1.09377	0.92313-1.29595	0.01722	0.49342	0.338	28.4821	26	0.33515	27.9421	25	0.31053
ebi-a-GCST90001418	25	0.521	0.94241	0.78839-1.1265	0.734	0.96621	0.79256-1.17792	0.649	1.03284	0.89853-1.18724	0.584	1.09227	0.79956-1.49215	0.817	0.98034	0.83052-1.15720	0.04443	0.12093	0.916	14.9741	24	0.92151	12.3805	23	0.96417
ebi-a-GCST90001982	28	0.87	0.98986	0.87710-1.1171	0.808	1.0163	0.89199-1.15792	0.65	1.02265	0.92826-1.12664	0.826	1.02414	0.82913-1.26503	0.959	0.99667	0.87952-1.12944	0.0245	0.38588	0.967	14.7937	27	0.97223	14.0159	26	0.97279
ebi-a-GCST90001765	24	0.912	1.00951	0.85533-1.1915	0.473	1.05972	0.90447-1.24161	0.652	1.03027	0.90515-1.17268	0.409	1.13592	0.84416-1.52852	0.877	1.01188	0.87261-1.17339	0.01194	0.69475	0.045	35.5786	23	0.04552	35.3247	22	0.03582
ebi-a-GCST90001628	32	0.489	1.04703	0.92079-1.1906	0.618	0.96667	0.84618-1.10432	0.652	0.97826	0.88910-1.07637	0.183	0.85177	0.67622-1.07290	0.88	0.99079	0.87977-1.11582	-0.03647	0.1315	0.898	21.3293	31	0.90295	18.9252	30	0.94156
ebi-a-GCST90001996	33	0.959	1.00411	0.86054-1.1716	0.642	0.96205	0.81723-1.13253	0.654	1.02416	0.92279-1.13666	0.636	1.07402	0.80115-1.43981	0.943	0.99392	0.84175-1.17360	0.01036	0.7327	0.245	36.4154	32	0.27062	36.2764	31	0.23603
ebi-a-GCST90001741	25	0.81	0.9812	0.84194-1.1435	0.804	1.01929	0.87625-1.18569	0.654	1.02741	0.91277-1.15645	0.105	0.72636	0.50099-1.05312	0.831	1.01682	0.87366-1.18344	0.02576	0.3608	0.559	24.0529	24	0.45858	23.1768	23	0.45049
ebi-a-GCST90002064	13	0.17	0.69525	0.42821-1.1288	0.668	0.93168	0.67456-1.28681	0.656	0.93176	0.68274-1.27161	0.847	0.95014	0.57154-1.57954	0.978	0.9925	0.59287-1.66152	0.08542	0.16286	0.009	25.9142	12	0.01104	21.5346	11	0.02824
ebi-a-GCST90001848	15	0.489	1.12809	0.80985-1.5714	0.48	1.10773	0.83395-1.47139	0.656	1.04792	0.85260-1.28799	0.468	1.17072	0.77385-1.77112	0.531	1.09757	0.82606-1.45832	-0.02548	0.58093	0.4	15.6669	14	0.33414	15.2899	13	0.28961
ebi-a-GCST90001625	25	0.03	0.69493	0.51019-0.9466	0.606	0.93253	0.71526-1.21581	0.657	0.95522	0.78035-1.16928	0.895	1.03924	0.58938-1.83246	0.303	0.84504	0.61774-1.15596	0.07317	0.01979	0.176	30.3651	24	0.17294	23.8582	23	0.4117
ebi-a-GCST90001880	18	0.774	1.01662	0.91028-1.1354	0.637	0.97612	0.88280-1.07930	0.66	0.9832	0.91182-1.06018	0.561	1.06397	0.86673-1.30609	0.701	0.98222	0.89767-1.07473	-0.02309	0.42932	0.918	10.1482	17	0.89728	9.49061	16	0.89184
ebi-a-GCST90002043	16	0.671	0.93396	0.68590-1.2717	0.133	0.85361	0.69438-1.04935	0.661	0.95897	0.79539-1.15618	0.212	0.77305	0.52512-1.13805	0.194	0.82228	0.62024-1.09014	0.00963	0.83277	0.034	26.858	15	0.02991	26.7695	14	0.02063
ebi-a-GCST90001609	18	0.432	1.12525	0.84448-1.4994	0.325	1.12713	0.88810-1.43050	0.661	1.03962	0.87393-1.23672	0.868	1.03631	0.68489-1.56806	0.359	1.10229	0.90019-1.34977	-0.02334	0.50309	0.437	17.8493	17	0.39841	17.3407	16	0.36389
ebi-a-GCST90001433	18	0.582	0.79664	0.36008-1.7625	0.14	0.79013	0.57808-1.07996	0.662	1.07166	0.78569-1.46171	0.498	0.83027	0.49044-1.40556	0.393	0.85029	0.59168-1.22194	0.06565	0.4372	0.005	36.0295	17	0.00455	34.6542	16	0.00443
ebi-a-GCST90001446	15	0.836	1.03089	0.77717-1.3674	0.686	1.05812	0.80425-1.39213	0.663	0.95595	0.78068-1.17056	0.964	0.99059	0.65919-1.48861	0.701	1.05695	0.80132-1.39414	-0.0415	0.46596	0.646	12.0732	14	0.60042	11.509	13	0.56825
ebi-a-GCST90001981	21	0.791	0.96965	0.77469-1.2137	0.524	0.95237	0.81973-1.10648	0.664	0.97213	0.85574-1.10436	0.755	0.95835	0.73658-1.24691	0.543	0.95835	0.83765-1.09645	0.0016	0.97834	0.052	33.017	20	0.0336	33.0157	19	0.02394
ebi-a-GCST90001543	26	0.127	0.87434	0.74026-1.0327	0.289	0.91024	0.76508-1.08296	0.664	0.9713	0.85166-1.10774	0.701	0.94932	0.73038-1.23390	0.22	0.91029	0.78627-1.05387	0.05245	0.07237	0.332	28.269	25	0.29562	24.642	24	0.42542
ebi-a-GCST90001494	24	0.584	0.97581	0.89501-1.0639	0.272	0.94583	0.85631-1.04471	0.664	0.98386	0.91415-1.05889	0.869	1.01304	0.87026-1.17925	0.314	0.95639	0.87858-1.04110	0.00882	0.7124	0.413	24.5252	23	0.37522	24.3708	22	0.3281
ebi-a-GCST90001570	27	0.9	1.01102	0.85309-1.1982	0.862	1.01523	0.85570-1.20450	0.666	1.02688	0.91027-1.15844	0.787	1.03692	0.79895-1.34578	0.767	1.02759	0.86015-1.22763	0.00619	0.80074	0.991	11.9497	26	0.99145	11.8846	25	0.98747
ebi-a-GCST90001941	14	0.321	1.07247	0.93930-1.2245	0.363	1.06642	0.92843-1.22492	0.666	1.02473	0.91698-1.14515	0.648	1.0515	0.85161-1.29829	0.42	1.05645	0.92843-1.20212	-0.04205	0.24101	0.754	10.0436	13	0.69036	8.52212	12	0.74311
ebi-a-GCST90001618	31	0.689	0.96093	0.79205-1.1658	0.949	0.99445	0.83848-1.17943	0.667	1.02848	0.90501-1.16880	0.871	0.97592	0.72981-1.30501	0.984	1.00187	0.83168-1.20689	0.02612	0.36482	0.219	36.6663	30	0.18707	35.625	29	0.18475
ebi-a-GCST90001532	22	0.77	1.01062	0.94229-1.0839	0.769	1.01174	0.93591-1.09371	0.667	1.01307	0.95486-1.07483	0.825	0.9859	0.87089-1.11610	0.891	1.0047	0.94030-1.07351	0.00301	0.90036	0.629	18.1952	21	0.63662	18.1791	20	0.57561
ebi-a-GCST90001911	23	0.64	1.06943	0.81068-1.4108	0.776	1.03716	0.80686-1.33321	0.668	0.96286	0.81008-1.14445	0.798	0.94534	0.61798-1.44611	0.965	0.9937	0.74918-1.31804	-0.0332	0.35277	0.831	16.0506	22	0.81336	15.1476	21	0.81548
ebi-a-GCST90001658	30	0.529	0.95836	0.84081-1.0923	0.609	0.96234	0.83080-1.11469	0.668	0.97758	0.88141-1.08424	0.964	0.99493	0.79954-1.23808	0.57	0.96588	0.85792-1.08742	0.01084	0.63036	0.786	24.1959	29	0.71921	23.9592	28	0.68369
ebi-a-GCST90002084	19	0.705	1.02644	0.89857-1.1725	0.813	0.98266	0.85004-1.13596	0.669	0.97639	0.87517-1.08931	0.453	0.90364	0.69752-1.17066	0.992	1.00065	0.88785-1.12777	-0.03104	0.21259	0.97	8.31798	18	0.97352	6.6406	17	0.98774
ebi-a-GCST90001897	18	0.961	1.00234	0.91519-1.0978	0.904	0.99307	0.88710-1.11170	0.67	0.98304	0.90873-1.06343	0.643	0.95054	0.77005-1.17334	0.878	0.9932	0.91171-1.08198	-0.0218	0.41737	0.917	9.40904	17	0.92655	8.71594	16	0.92465
ebi-a-GCST90001637	31	0.971	0.99394	0.71444-1.3828	0.623	0.94296	0.74630-1.19145	0.67	0.96501	0.81929-1.13663	0.337	0.8169	0.54423-1.22617	0.744	0.9552	0.72769-1.25384	-0.00796	0.84137	0.798	23.9559	30	0.77402	23.9151	29	0.73311
ebi-a-GCST90001599	15	0.836	1.06155	0.60930-1.8495	0.9	0.97959	0.70997-1.35161	0.673	0.94947	0.74648-1.20766	0.828	0.94573	0.57656-1.55130	0.789	0.94173	0.61149-1.45032	-0.02111	0.66922	0.93	7.19511	14	0.92693	7.00407	13	0.90194
ebi-a-GCST90001502	37	0.679	0.98412	0.91272-1.0611	0.363	0.95667	0.86965-1.05238	0.675	0.98653	0.92601-1.05101	0.11	1.13567	0.97518-1.32257	0.495	0.97459	0.90580-1.04860	0.00345	0.90363	0.057	48.5822	36	0.07852	48.5615	35	0.06344
ebi-a-GCST90001439	15	0.126	2.15396	0.85960-5.3973	0.378	1.21724	0.78600-1.88508	0.677	1.07962	0.75300-1.54792	0.415	1.41426	0.62996-3.17504	0.396	1.39545	0.66158-2.94337	-0.12549	0.13629	0.07	22.8056	14	0.06351	19.1003	13	0.12003
ebi-a-GCST90001601	19	0.647	0.93471	0.70375-1.2415	0.894	0.98348	0.76984-1.25642	0.68	1.04103	0.86008-1.26004	0.441	0.85225	0.57252-1.26867	0.653	0.93994	0.72076-1.22577	0.03619	0.32888	0.243	22.7083	18	0.20205	21.4343	17	0.20747
ebi-a-GCST90002121	25	0.971	1.00733	0.68024-1.4917	0.803	0.97123	0.77266-1.22085	0.68	0.9587	0.78466-1.17134	0.271	0.8028	0.54799-1.17609	0.668	0.94466	0.73068-1.22129	-0.01476	0.77499	0.031	39.8042	24	0.02245	39.66	23	0.01677
ebi-a-GCST90001499	27	0.743	1.02119	0.90203-1.1561	0.381	1.05841	0.93225-1.20164	0.681	1.02052	0.92643-1.12417	0.67	1.05889	0.81631-1.37355	0.394	1.0509	0.93920-1.17589	-0.00042	0.9866	0.418	27.4647	26	0.38529	27.4644	25	0.33309
ebi-a-GCST90001915	14	0.691	0.96305	0.80365-1.1541	0.839	1.02054	0.83882-1.24164	0.681	1.03079	0.89198-1.19120	0.96	1.00829	0.73250-1.38791	0.566	1.05683	0.87914-1.27043	0.04331	0.25596	0.221	16.172	13	0.23997	14.4575	12	0.27245
ebi-a-GCST90001473	16	0.816	0.97834	0.81599-1.1730	0.536	0.94739	0.79820-1.12445	0.682	0.97336	0.85558-1.10735	0.961	0.99173	0.71638-1.37291	0.919	0.99173	0.84651-1.16186	-0.00324	0.9367	0.503	14.8174	15	0.46465	14.8104	14	0.39123
ebi-a-GCST90001969	18	0.503	1.09765	0.84079-1.4330	0.633	1.05083	0.85710-1.28836	0.682	1.0353	0.87679-1.22247	0.183	1.2919	0.89965-1.85519	0.386	1.09442	0.89702-1.33528	-0.02081	0.58497	0.347	20.3308	17	0.25766	19.9435	16	0.22278
ebi-a-GCST90002028	24	0.496	0.90432	0.68036-1.2020	0.95	0.99246	0.78308-1.25783	0.684	0.96574	0.81659-1.14215	0.677	1.09727	0.71306-1.68849	0.875	1.02672	0.74195-1.42078	0.01838	0.57782	0.466	23.5479	23	0.42918	23.2112	22	0.38989
ebi-a-GCST90001807	16	0.837	0.97316	0.75484-1.2546	0.591	0.93399	0.72806-1.19818	0.686	0.96103	0.79277-1.16498	0.543	1.16642	0.71811-1.89459	0.693	0.95314	0.75476-1.20366	-0.00579	0.87841	0.366	17.5505	15	0.28703	17.5201	14	0.22952
ebi-a-GCST90001659	25	0.296	0.89029	0.71963-1.1014	0.75	0.96707	0.78704-1.18829	0.687	0.97186	0.84599-1.11646	0.537	1.09888	0.81790-1.47637	0.995	1.00061	0.81664-1.22602	0.03403	0.29807	0.663	21.2362	24	0.62476	20.1026	23	0.63571
ebi-a-GCST90001956	21	0.304	0.93576	0.82738-1.0583	0.666	0.97821	0.88520-1.08100	0.689	1.01623	0.93920-1.09958	0.313	1.12905	0.89737-1.42054	0.729	0.98208	0.88768-1.08651	0.05148	0.10345	0.565	18.2098	20	0.57359	15.2839	19	0.70439
ebi-a-GCST90001894	26	0.313	0.90218	0.74172-1.0974	0.77	0.97407	0.81702-1.16131	0.689	0.97258	0.84880-1.11442	0.952	0.9905	0.72810-1.34746	0.578	0.95687	0.82074-1.11559	0.03584	0.3068	0.128	33.9077	25	0.1099	32.4342	24	0.11659
ebi-a-GCST90001431	20	0.525	1.06301	0.88357-1.2789	0.414	1.08099	0.89674-1.30311	0.691	1.03002	0.89024-1.19173	0.501	1.20694	0.70532-2.06532	0.286	1.10021	0.92773-1.30475	-0.01997	0.58152	0.425	20.7164	19	0.35268	20.3601	18	0.31292
ebi-a-GCST90001959	20	0.18	1.30568	0.89772-1.8990	0.547	0.92138	0.70573-1.20294	0.693	1.03833	0.86140-1.25159	0.425	0.8332	0.53750-1.29156	0.443	0.84387	0.55210-1.28982	-0.05652	0.18369	0.455	19.0232	19	0.45535	17.1115	18	0.51545
ebi-a-GCST90001518	28	0.487	0.97729	0.91684-1.0417	0.744	0.9875	0.91565-1.06499	0.694	0.98917	0.93694-1.04431	0.43	0.95916	0.86622-1.06207	0.49	0.97696	0.91520-1.04289	0.01634	0.48786	0.903	18.5913	27	0.88441	18.0961	26	0.87225
ebi-a-GCST90002118	15	0.62	0.90169	0.60475-1.3444	0.878	0.9781	0.73719-1.29773	0.694	0.96144	0.79023-1.16973	0.589	1.13185	0.72976-1.75549	0.928	0.98511	0.71502-1.35724	0.0159	0.72365	0.618	12.329	14	0.5799	12.1985	13	0.51144
ebi-a-GCST90001978	17	0.57	1.03942	0.91226-1.1843	0.936	1.00569	0.87625-1.15426	0.695	1.02163	0.91787-1.13712	0.33	1.10987	0.90571-1.36006	0.74	1.02199	0.90063-1.15970	-0.01519	0.65633	0.803	11.8739	16	0.75262	11.6678	15	0.70398
ebi-a-GCST90001762	20	0.279	1.1864	0.87888-1.6015	0.406	1.10693	0.87112-1.40657	0.696	1.03255	0.87947-1.21227	0.319	1.22202	0.83248-1.79384	0.386	1.13242	0.86020-1.49079	-0.03804	0.2978	0.419	20.6383	19	0.35712	19.3994	18	0.36763
ebi-a-GCST90002008	23	0.586	0.95381	0.80652-1.1280	0.448	0.94059	0.80297-1.10179	0.697	0.9747	0.85687-1.10874	0.516	1.11245	0.81049-1.52690	0.56	0.9556	0.82223-1.11060	0.01501	0.68798	0.33	25.4186	22	0.27748	25.2195	21	0.23778
ebi-a-GCST90001515	23	0.81	0.97271	0.77858-1.2152	0.412	1.07534	0.90404-1.27909	0.7	0.97449	0.85458-1.11122	0.545	1.10422	0.80523-1.51422	0.363	1.11644	0.88513-1.40819	0.00075	0.98409	0.166	28.0171	22	0.17511	28.0166	21	0.13968
ebi-a-GCST90001742	23	0.847	0.97836	0.78592-1.2179	0.806	1.0288	0.82020-1.29045	0.702	1.03091	0.88225-1.20463	0.431	0.85446	0.58168-1.25515	0.769	1.03306	0.83352-1.28037	0.02198	0.50727	0.31	25.7577	22	0.26223	25.2113	21	0.23813
ebi-a-GCST90002047	17	0.807	1.05272	0.70174-1.5792	0.764	1.03358	0.83305-1.28237	0.702	0.96575	0.80801-1.15427	0.666	1.07865	0.76966-1.51169	0.629	1.06516	0.82882-1.36890	-0.03058	0.64732	0.088	25.1534	16	0.06717	24.7932	15	0.05279
ebi-a-GCST90001687	15	0.686	0.86712	0.44160-1.7027	0.725	0.93931	0.66235-1.33207	0.703	0.95217	0.74004-1.22511	0.408	0.78819	0.45593-1.36260	0.862	0.95446	0.56996-1.59837	0.01801	0.77415	0.594	12.197	14	0.59048	12.1112	13	0.51855
ebi-a-GCST90001437	20	0.938	0.97581	0.52971-1.7976	0.94	1.0136	0.71280-1.44132	0.706	0.95357	0.74461-1.22117	0.901	1.03692	0.59122-1.81863	0.87	1.05664	0.55110-2.02594	-0.00454	0.93607	0.35	20.1555	19	0.38527	20.1481	18	0.32454
ebi-a-GCST90001573	26	0.983	0.99796	0.83256-1.1962	0.915	0.99051	0.83210-1.17909	0.709	0.97598	0.85884-1.10910	0.888	1.02009	0.77507-1.34256	0.839	0.98346	0.83881-1.15305	-0.00856	0.73689	0.862	18.3998	25	0.82495	18.2843	24	0.789
ebi-a-GCST90001686	21	0.437	1.24862	0.72185-2.1598	0.481	0.89105	0.64645-1.22819	0.711	0.95182	0.73270-1.23647	0.339	0.75101	0.42369-1.33120	0.994	1.00168	0.65743-1.52619	-0.05462	0.28374	0.105	28.8814	20	0.09012	27.1429	19	0.10137
ebi-a-GCST90001506	19	0.484	0.90806	0.69742-1.1823	0.868	1.0184	0.82083-1.26352	0.713	1.03472	0.86279-1.24092	0.603	1.09085	0.79036-1.50557	0.91	0.98823	0.80736-1.20961	0.05177	0.20619	0.137	25.7417	18	0.10581	23.3672	17	0.13767
ebi-a-GCST90001812	17	0.649	0.92522	0.66649-1.2844	0.442	0.90057	0.68942-1.17639	0.713	0.96495	0.79763-1.16738	0.522	0.86102	0.54979-1.34842	0.337	0.8284	0.57043-1.20302	0.01689	0.76192	0.907	8.46233	16	0.9339	8.36714	15	0.90822
ebi-a-GCST90002026	25	0.191	0.88796	0.74687-1.0557	0.454	0.93469	0.78327-1.11537	0.714	0.97796	0.86802-1.10183	0.857	0.97588	0.75031-1.26926	0.523	0.94605	0.80000-1.11877	0.03825	0.14487	0.598	22.4053	24	0.55509	20.1277	23	0.63419
ebi-a-GCST90001979	19	0.856	1.01215	0.89008-1.1510	0.567	1.03865	0.91222-1.18260	0.715	0.9825	0.89376-1.08005	0.83	0.97104	0.74597-1.26403	0.527	1.03991	0.92322-1.17135	-0.02019	0.50821	0.436	17.7023	18	0.47542	17.2391	17	0.43829
ebi-a-GCST90002091	18	0.676	0.97139	0.84995-1.1102	0.437	0.94838	0.82965-1.08411	0.717	1.01727	0.92741-1.11583	0.742	0.95165	0.71220-1.27161	0.881	0.99131	0.88562-1.10961	0.03185	0.36039	0.318	19.5455	17	0.29813	18.5193	16	0.29438
ebi-a-GCST90001785	26	0.944	0.99237	0.80411-1.2247	0.483	0.91845	0.72410-1.16495	0.718	1.02781	0.88569-1.19274	0.509	0.86223	0.55893-1.33011	0.335	0.90446	0.74028-1.10505	0.01139	0.64778	0.568	21.8226	25	0.64597	21.6086	24	0.60262
ebi-a-GCST90001432	24	0.335	1.15944	0.86419-1.5556	0.679	1.06092	0.80200-1.40343	0.719	1.03326	0.86443-1.23507	0.22	1.38013	0.83643-2.27726	0.479	1.11999	0.82245-1.52518	-0.03314	0.3441	0.531	21.8533	23	0.52912	20.9184	22	0.52578
ebi-a-GCST90001984	15	0.729	0.9302	0.62347-1.3878	0.744	1.03722	0.83280-1.29181	0.72	1.03098	0.87261-1.21810	0.509	1.10946	0.82136-1.49862	0.881	1.01733	0.81603-1.26830	0.02872	0.5867	0.471	14.5824	14	0.40728	14.242	13	0.35703
ebi-a-GCST90001505	24	0.737	0.9533	0.72367-1.2558	0.942	1.00829	0.80618-1.26107	0.72	1.03315	0.86432-1.23495	0.793	1.05322	0.71818-1.54456	0.705	0.9565	0.76192-1.20076	0.03052	0.45781	0.137	31.1702	23	0.11867	30.3814	22	0.10948
ebi-a-GCST90001986	15	0.212	1.26598	0.89032-1.8001	0.373	1.14065	0.85409-1.52335	0.72	1.03846	0.84456-1.27688	0.55	1.15903	0.72243-1.85948	0.308	1.18062	0.86815-1.60555	-0.05569	0.19616	0.585	12.2324	14	0.58765	10.3758	13	0.66295
ebi-a-GCST90001900	5	0.675	0.7748	0.26263-2.2858	0.473	0.89956	0.67373-1.20109	0.722	0.90613	0.52673-1.55881	0.722	0.91724	0.58856-1.42945	0.514	0.90887	0.69968-1.18060	0.05534	0.75311	0.019	20.7933	4	0.00035	20.0014	3	0.00017
ebi-a-GCST90001732	24	0.925	0.97958	0.64012-1.4991	0.463	1.11351	0.83535-1.48428	0.722	1.03951	0.83984-1.28664	0.805	1.06887	0.63433-1.80108	0.609	1.11149	0.74557-1.65699	0.01237	0.75326	0.231	27.3862	23	0.23988	27.2607	22	0.20149
ebi-a-GCST90001572	21	0.394	0.85456	0.60008-1.2170	0.816	1.03111	0.79645-1.33490	0.723	0.96516	0.79316-1.17445	0.972	1.00783	0.65459-1.55168	0.796	1.04562	0.74866-1.46037	0.02965	0.42551	0.387	21.5199	20	0.36712	20.7941	19	0.34829
ebi-a-GCST90001950	18	0.557	0.942	0.77482-1.1453	0.503	0.95537	0.83588-1.09193	0.724	0.98193	0.88730-1.08665	0.474	1.1083	0.84144-1.45978	0.508	0.95109	0.82250-1.09979	0.01956	0.62988	0.462	17.8381	17	0.39912	17.573	16	0.34949
ebi-a-GCST90001920	18	0.074	0.85685	0.73132-1.0039	0.945	0.9933	0.82127-1.20136	0.726	0.97483	0.84541-1.12406	0.146	1.29852	0.92825-1.81650	0.772	0.97394	0.81691-1.16115	0.07371	0.01712	0.229	21.4784	17	0.20562	14.4028	16	0.56873
ebi-a-GCST90002096	18	0.468	0.8257	0.49815-1.3686	0.9	0.98444	0.77067-1.25750	0.726	0.96311	0.78018-1.18892	0.367	1.29588	0.74911-2.24174	0.518	0.89476	0.64323-1.24464	0.04764	0.51912	0.022	29.659	17	0.02891	28.8747	16	0.02479
ebi-a-GCST90001896	16	0.762	1.033	0.84058-1.2695	0.622	1.04882	0.86752-1.26801	0.728	0.97501	0.84525-1.12469	0.35	1.18864	0.83662-1.68877	0.515	1.0577	0.89677-1.24751	-0.02981	0.45305	0.324	17.721	15	0.27762	16.9977	14	0.2563
ebi-a-GCST90001671	21	0.26	0.88463	0.71914-1.0882	0.973	0.99618	0.80058-1.23959	0.731	0.97494	0.84367-1.12664	0.406	0.86226	0.61222-1.21441	0.742	0.96304	0.77228-1.20093	0.0459	0.21416	0.605	18.0681	20	0.58292	16.4163	19	0.62935
ebi-a-GCST90001409	20	0.733	0.97271	0.83201-1.1372	0.902	0.98872	0.82569-1.18395	0.731	0.97853	0.86459-1.10749	0.616	0.92015	0.66836-1.26682	0.9	0.99054	0.85623-1.14593	0.00323	0.90363	0.669	16.6906	19	0.61082	16.6755	18	0.54551
ebi-a-GCST90001955	20	0.464	0.93324	0.77881-1.1183	0.441	0.95868	0.86102-1.06742	0.732	1.02076	0.90730-1.14841	0.447	1.12865	0.83156-1.53187	0.35	0.9506	0.85702-1.05439	0.05783	0.22169	0.043	36.6761	19	0.00871	33.6779	18	0.0138
ebi-a-GCST90001657	12	0.92	1.02394	0.65301-1.6056	0.309	0.83089	0.58132-1.18760	0.736	0.95391	0.72497-1.25515	0.63	0.87299	0.51009-1.49408	0.422	0.8311	0.53822-1.28335	-0.01908	0.70501	0.759	7.19596	11	0.783	7.04419	10	0.72127
ebi-a-GCST90001620	25	0.072	1.19456	0.99298-1.4371	0.774	1.02648	0.85870-1.22705	0.737	1.02356	0.89352-1.17254	0.851	0.96799	0.69169-1.35466	0.284	1.09898	0.92812-1.30128	-0.07372	0.03532	0.078	33.9611	24	0.08536	27.8956	23	0.21976
ebi-a-GCST90002066	23	0.959	1.00368	0.87449-1.1520	0.912	0.99147	0.85120-1.15487	0.739	0.98217	0.88361-1.09173	0.942	1.01024	0.77081-1.32404	0.688	0.97229	0.84937-1.11300	-0.01393	0.62682	0.315	25.0625	22	0.2941	24.7752	21	0.25703
ebi-a-GCST90001909	15	0.741	0.9388	0.65069-1.3545	0.514	1.09513	0.83376-1.43845	0.739	1.04494	0.80652-1.35384	0.318	1.25901	0.81442-1.94631	0.437	1.11173	0.85750-1.44132	0.04328	0.42745	0.016	28.4604	14	0.01235	27.0634	13	0.01219
ebi-a-GCST90001529	16	0.992	0.99888	0.79868-1.2493	0.812	1.02456	0.83912-1.25097	0.743	0.97668	0.84839-1.12438	0.92	1.01738	0.73087-1.41621	0.838	1.02156	0.83560-1.24890	-0.01007	0.79924	0.429	16.1921	15	0.3694	16.1148	14	0.30642
ebi-a-GCST90001632	27	0.496	1.11323	0.82144-1.5087	0.327	1.1385	0.87826-1.47585	0.744	1.02948	0.86501-1.22523	0.873	1.03789	0.66023-1.63155	0.495	1.11888	0.81430-1.53740	-0.01926	0.54384	0.536	25.4231	26	0.49514	25.0437	25	0.45993
ebi-a-GCST90001416	20	0.322	0.94374	0.84415-1.0551	0.529	0.96437	0.86134-1.07973	0.746	0.9849	0.89817-1.08001	0.674	0.95799	0.78670-1.16657	0.568	0.96948	0.87331-1.07624	0.03973	0.19912	0.626	17.6524	19	0.54576	15.8751	18	0.60126
ebi-a-GCST90001962	5	0.108	2.68337	1.14232-6.3034	0.704	0.90171	0.52858-1.53824	0.749	1.08199	0.66751-1.75383	0.513	0.74901	0.34014-1.64938	0.586	0.7576	0.30173-1.90221	-0.2121	0.10328	0.195	6.69045	4	0.15318	1.31764	3	0.72495
ebi-a-GCST90001938	13	0.47	0.84961	0.55438-1.3021	0.607	0.9136	0.64734-1.28937	0.75	0.96062	0.75057-1.22944	0.499	0.83304	0.49816-1.39301	0.517	0.86148	0.55637-1.33392	0.03323	0.504	0.825	7.3516	12	0.83353	6.87438	11	0.80916
ebi-a-GCST90001428	26	0.397	1.05903	0.92958-1.2065	0.927	1.00631	0.87908-1.15196	0.75	1.01783	0.91311-1.13455	0.037	1.32088	1.03104-1.69218	0.413	1.0482	0.93830-1.17097	-0.03021	0.2951	0.25	31.1075	25	0.18548	29.6902	24	0.19523
ebi-a-GCST90002081	30	0.802	1.05661	0.68991-1.6182	0.54	1.08161	0.84155-1.39014	0.751	1.03382	0.84173-1.26974	0.933	0.97895	0.60035-1.59632	0.882	1.02937	0.70461-1.50380	-0.00477	0.90921	0.102	39.9037	29	0.08552	39.8849	28	0.0677
ebi-a-GCST90001489	27	0.518	0.94867	0.81052-1.1104	0.853	0.9881	0.87077-1.12123	0.752	1.01647	0.91872-1.12462	0.542	0.9202	0.70706-1.19760	0.781	0.982	0.86507-1.11473	0.02894	0.27261	0.797	20.5679	26	0.76391	19.3095	25	0.78204
ebi-a-GCST90001721	19	0.893	1.01659	0.80240-1.2880	0.602	1.07116	0.82712-1.38720	0.753	0.97269	0.81871-1.15564	0.476	0.84332	0.53323-1.33372	0.841	1.02489	0.80918-1.29809	-0.01575	0.60047	0.732	13.7927	18	0.7425	13.5079	17	0.70158
ebi-a-GCST90001606	15	0.355	0.8242	0.55505-1.2239	0.878	0.97617	0.71827-1.32666	0.754	1.03961	0.81501-1.32611	0.47	1.20849	0.73325-1.99174	0.963	1.0113	0.63687-1.60586	0.06461	0.17614	0.225	17.7315	14	0.21929	15.3196	13	0.28783
ebi-a-GCST90001780	26	0.284	0.94283	0.84864-1.0475	0.456	0.95201	0.83665-1.08328	0.757	0.98636	0.90404-1.07617	0.71	0.95704	0.76156-1.20269	0.164	0.92502	0.83147-1.02911	0.04071	0.14695	0.542	23.7113	25	0.5361	21.4648	24	0.61118
ebi-a-GCST90001415	18	0.211	1.1457	0.93378-1.4057	0.165	1.1701	0.93735-1.46064	0.758	1.02493	0.87659-1.19837	0.582	0.8854	0.57869-1.35468	0.413	1.08647	0.89520-1.31860	-0.05625	0.1359	0.192	21.3266	17	0.21202	18.4786	16	0.29662
ebi-a-GCST90001999	19	0.774	1.04402	0.78193-1.3940	0.54	1.0756	0.85199-1.35790	0.759	0.97608	0.83646-1.13902	0.537	0.89228	0.62571-1.27241	0.657	1.06406	0.81264-1.39326	-0.02497	0.59646	0.704	13.9067	18	0.73516	13.6155	17	0.69411
ebi-a-GCST90001858	30	0.585	0.95562	0.81332-1.1228	0.271	1.08338	0.93935-1.24949	0.76	0.98274	0.87906-1.09865	0.945	0.99146	0.78042-1.25957	0.904	0.99146	0.86373-1.13809	0.01272	0.63719	0.209	35.6137	29	0.18509	35.3269	28	0.16055
ebi-a-GCST90001940	11	0.464	0.7298	0.32547-1.6364	0.928	1.01935	0.67406-1.54153	0.76	1.05403	0.75251-1.47636	0.964	1.01617	0.51513-2.00454	0.975	0.99179	0.59845-1.64368	0.0744	0.35167	0.197	14.1768	10	0.16508	12.8043	9	0.17166
ebi-a-GCST90001544	19	0.634	0.94158	0.73837-1.2007	0.567	0.93479	0.74212-1.17748	0.76	1.02457	0.87665-1.19744	0.936	0.98409	0.66790-1.44996	0.383	0.90002	0.71455-1.13362	0.03442	0.3872	0.687	14.3772	18	0.70419	13.5895	17	0.69591
ebi-a-GCST90001855	20	0.592	1.05425	0.87199-1.2746	0.594	1.04851	0.88072-1.24828	0.763	0.98155	0.86985-1.10759	0.63	0.92183	0.66533-1.27721	0.859	1.01703	0.84652-1.22189	-0.03366	0.35069	0.368	20.0581	19	0.39109	19.0848	18	0.38662
ebi-a-GCST90002030	20	0.262	0.7862	0.52324-1.1813	0.31	1.13236	0.89079-1.43944	0.763	1.02753	0.86141-1.22569	0.5	1.15376	0.76731-1.73486	0.608	1.08258	0.80323-1.45907	0.08492	0.16995	0.891	11.8236	19	0.89303	9.77978	18	0.93886
ebi-a-GCST90002099	31	0.353	0.94111	0.82972-1.0674	0.212	0.92582	0.82031-1.04490	0.763	0.98503	0.89309-1.08643	0.416	0.91805	0.74908-1.12513	0.248	0.93078	0.82600-1.04886	0.03234	0.27113	0.107	40.8159	30	0.09	39.1182	29	0.09942
ebi-a-GCST90002053	16	0.164	0.89546	0.77277-1.0376	0.583	0.95752	0.82023-1.11780	0.765	0.98159	0.86886-1.10895	0.508	1.13287	0.79005-1.62446	0.427	0.94182	0.81551-1.08769	0.06298	0.0789	0.172	20.289	15	0.16113	16.1464	14	0.30451
ebi-a-GCST90001631	26	0.445	1.14884	0.80921-1.6310	0.334	1.13634	0.87691-1.47252	0.766	1.0311	0.84297-1.26122	0.816	1.05562	0.67234-1.65740	0.415	1.13504	0.84118-1.53156	-0.02746	0.46506	0.171	33.0776	25	0.12914	32.3351	24	0.1189
ebi-a-GCST90001403	23	0.745	1.04786	0.79341-1.3839	0.55	1.07751	0.84332-1.37674	0.77	1.02594	0.86419-1.21796	0.299	1.26544	0.82022-1.95232	0.395	1.14407	0.84406-1.55071	-0.00571	0.8517	0.577	20.1807	22	0.57174	20.1449	21	0.5121
ebi-a-GCST90001546	22	0.769	0.94698	0.66189-1.3549	0.203	1.19381	0.90878-1.56823	0.773	1.03075	0.83921-1.26600	0.55	1.14962	0.73303-1.80296	0.259	1.21226	0.87591-1.67778	0.02203	0.57432	0.173	27.0861	21	0.16802	26.6515	20	0.14536
ebi-a-GCST90001426	24	0.749	0.97127	0.81450-1.1582	0.799	0.97802	0.82401-1.16082	0.776	0.98003	0.85315-1.12578	0.9	0.97694	0.68086-1.40175	0.779	0.97694	0.83177-1.14744	0.00454	0.86771	0.262	28.9996	23	0.18032	28.9622	22	0.14594
ebi-a-GCST90001634	20	0.643	1.07853	0.78794-1.4763	0.614	0.93634	0.72499-1.20930	0.776	1.02674	0.85638-1.23099	0.448	0.84644	0.55528-1.29027	0.406	0.88541	0.66877-1.17224	-0.01466	0.71095	0.673	15.9803	19	0.65859	15.8386	18	0.60381
ebi-a-GCST90001788	20	0.237	0.79182	0.54487-1.1507	0.42	0.88541	0.65883-1.18993	0.777	0.97004	0.78591-1.19730	0.742	0.92395	0.58098-1.46938	0.381	0.84733	0.58994-1.21704	0.04505	0.21404	0.875	12.5171	19	0.86235	10.858	18	0.90029
ebi-a-GCST90001423	15	0.384	0.73023	0.36875-1.4460	0.989	0.99742	0.68255-1.45754	0.777	1.0481	0.75688-1.45136	0.546	1.2344	0.63360-2.40489	0.857	1.04676	0.64172-1.70745	0.07478	0.26124	0.092	21.6979	14	0.08504	19.6161	13	0.1052
ebi-a-GCST90001947	25	0.394	0.95094	0.84886-1.0653	0.659	0.97829	0.88732-1.07859	0.778	1.01071	0.93849-1.08848	0.735	1.03851	0.83619-1.28978	0.752	0.98503	0.89800-1.08050	0.03802	0.17821	0.597	21.774	24	0.59276	19.8453	23	0.65123
ebi-a-GCST90001874	27	0.077	1.20738	0.98804-1.4754	0.348	1.07161	0.92749-1.23813	0.78	0.98371	0.87662-1.10388	0.986	0.99752	0.76071-1.30805	0.339	1.10615	0.90275-1.35538	-0.0799	0.02627	0.085	35.8224	26	0.09498	29.2863	25	0.25212
ebi-a-GCST90001766	20	0.674	0.96439	0.81658-1.1390	0.568	0.94922	0.79372-1.13517	0.781	1.01734	0.90136-1.14824	0.306	1.19078	0.85990-1.64897	0.473	0.9322	0.77256-1.12482	0.02877	0.37085	0.891	10.7984	19	0.93043	9.95599	18	0.93333
ebi-a-GCST90001589	15	0.232	1.29833	0.86364-1.9518	0.245	1.20488	0.87986-1.64997	0.784	0.96609	0.75472-1.23666	0.474	1.28814	0.65661-2.52711	0.251	1.23114	0.87609-1.73007	-0.07499	0.10818	0.156	19.6018	14	0.1432	15.9504	13	0.25182
ebi-a-GCST90001400	15	0.478	0.95252	0.83608-1.0852	0.566	0.95958	0.83358-1.10464	0.784	0.98537	0.88666-1.09507	0.863	1.02175	0.80399-1.29849	0.559	0.96313	0.85173-1.08911	0.02625	0.40084	0.724	11.2793	14	0.66397	10.5249	13	0.65055
ebi-a-GCST90001466	20	0.441	1.16982	0.79169-1.7286	0.874	1.02882	0.72317-1.46363	0.788	0.96709	0.75799-1.23387	0.358	1.33012	0.73454-2.40861	0.393	1.30805	0.71631-2.38861	-0.05824	0.24073	0.042	29.0228	19	0.06563	26.829	18	0.08226
ebi-a-GCST90001890	14	0.997	1.00099	0.64315-1.5579	0.911	0.98599	0.76904-1.26415	0.791	1.02941	0.83119-1.27491	0.898	0.97512	0.66919-1.42092	0.794	1.03565	0.80071-1.33953	0.00826	0.88824	0.256	17.3362	13	0.18439	17.3065	12	0.13843
ebi-a-GCST90001887	17	0.805	0.98201	0.85244-1.1313	0.818	1.01705	0.88033-1.17502	0.791	0.98543	0.88410-1.09839	0.567	1.05975	0.87238-1.28737	0.833	1.01538	0.88298-1.16764	0.0024	0.93854	0.495	15.8613	16	0.46269	15.8548	15	0.39177
ebi-a-GCST90001476	7	0.419	0.73751	0.37432-1.4531	0.355	1.19786	0.81701-1.75625	0.793	0.95325	0.66684-1.36267	0.465	0.73892	0.34547-1.58046	0.586	1.17727	0.67546-2.05189	0.08202	0.41953	0.121	11.8168	6	0.06618	10.2345	5	0.06886
ebi-a-GCST90001944	17	0.43	0.94066	0.81144-1.0905	0.366	0.93824	0.81717-1.07724	0.796	0.98404	0.87092-1.11185	0.113	0.85101	0.70468-1.02772	0.185	0.9133	0.80344-1.03819	0.04152	0.30853	0.039	29.0323	16	0.02372	27.0301	15	0.02849
ebi-a-GCST90001490	8	0.855	0.96404	0.66230-1.4033	0.519	0.90111	0.65687-1.23615	0.796	1.03483	0.79785-1.34220	0.773	0.92152	0.53973-1.57336	0.395	0.83657	0.56858-1.23087	0.03906	0.60748	0.249	9.24737	7	0.23538	8.81605	6	0.18419
ebi-a-GCST90001853	20	0.127	1.18199	0.96284-1.4510	0.224	1.10853	0.93873-1.30905	0.797	0.98256	0.85921-1.12363	0.644	1.0789	0.78605-1.48086	0.387	1.0789	0.91186-1.27654	-0.0781	0.04058	0.239	22.6346	19	0.25382	17.7662	18	0.47115
ebi-a-GCST90001945	17	0.431	0.94083	0.81158-1.0907	0.366	0.93851	0.81781-1.07704	0.797	0.98412	0.87097-1.11197	0.128	0.85285	0.70238-1.03555	0.162	0.90989	0.80207-1.03221	0.04145	0.3092	0.04	29.0336	16	0.02371	27.0367	15	0.02844
ebi-a-GCST90002114	21	0.336	0.80553	0.52427-1.2377	0.576	0.92233	0.69464-1.22465	0.798	0.97395	0.79583-1.19194	0.59	0.89182	0.59208-1.34332	0.47	0.87694	0.61812-1.24415	0.04979	0.33855	0.994	8.66046	20	0.98652	7.6966	19	0.98947
ebi-a-GCST90002014	14	0.895	0.97602	0.68634-1.3880	0.93	0.98876	0.76711-1.27445	0.799	0.97516	0.80326-1.18385	0.825	1.0508	0.68264-1.61753	0.818	1.03904	0.75493-1.43009	-0.00029	0.99529	0.425	13.238	13	0.4296	13.2379	12	0.35199
ebi-a-GCST90001472	19	0.908	0.98961	0.83044-1.1793	0.518	0.94562	0.79824-1.12020	0.799	0.98426	0.87089-1.11239	0.309	0.84593	0.61842-1.15714	0.787	0.97584	0.81908-1.16260	-0.0033	0.93358	0.613	15.8644	18	0.60201	15.8572	17	0.53398
ebi-a-GCST90001598	19	0.495	0.81131	0.45053-1.4610	0.294	0.8358	0.59794-1.16828	0.8	0.97047	0.76949-1.22393	0.355	0.76651	0.44269-1.32719	0.336	0.77787	0.47283-1.27970	0.03174	0.5239	0.478	17.7746	18	0.47059	17.3426	17	0.4314
ebi-a-GCST90001444	23	0.917	0.97521	0.61155-1.5551	0.95	0.99004	0.72494-1.35207	0.801	1.03205	0.80787-1.31842	0.726	1.10462	0.63705-1.91537	0.953	1.01131	0.70042-1.46018	0.01285	0.78083	0.16	29.0667	22	0.14297	28.9572	21	0.11503
ebi-a-GCST90001899	23	0.289	1.06518	0.95052-1.1937	0.741	0.97666	0.84899-1.12352	0.803	1.01196	0.92150-1.11131	0.587	0.93636	0.74115-1.18299	0.554	0.96321	0.85230-1.08856	-0.04158	0.13611	0.702	17.9044	22	0.71164	15.5022	21	0.79694
ebi-a-GCST90001815	18	0.934	1.00693	0.85627-1.1841	0.476	0.94585	0.81169-1.10220	0.807	1.01651	0.89119-1.15944	0.035	1.45282	1.05472-2.00119	0.649	0.97066	0.85592-1.10078	0.00994	0.8376	0.075	27.6518	17	0.04917	27.577	16	0.0355
ebi-a-GCST90001495	24	0.638	0.95993	0.81131-1.1358	0.879	0.99076	0.87901-1.11671	0.808	1.01284	0.91390-1.12248	0.9	1.0164	0.79137-1.30542	0.821	0.98656	0.87844-1.10799	0.02856	0.43591	0.368	27.0252	23	0.2549	26.2731	22	0.24014
ebi-a-GCST90001509	27	0.55	0.97673	0.90505-1.0541	0.502	0.96992	0.88708-1.06049	0.808	0.99222	0.93163-1.05676	0.179	0.91692	0.81074-1.03700	0.501	1.02575	0.95359-1.10337	0.02138	0.46999	0.424	27.3609	26	0.3906	26.7842	25	0.36675
ebi-a-GCST90001516	20	0.832	1.02614	0.81137-1.2978	0.739	1.03321	0.85250-1.25223	0.812	0.98269	0.85092-1.13488	0.817	1.04098	0.74494-1.45466	0.582	1.07914	0.82673-1.40863	-0.01898	0.64885	0.195	23.2217	19	0.22772	22.9483	18	0.19259
ebi-a-GCST90001898	25	0.799	0.96773	0.75391-1.2422	0.645	1.0496	0.85411-1.28983	0.813	0.98093	0.83641-1.15043	0.886	1.02649	0.71970-1.46405	0.829	0.97702	0.79338-1.20317	0.00518	0.88965	0.033	37.6346	24	0.03778	37.6024	23	0.02809
ebi-a-GCST90001727	16	0.756	1.02835	0.86534-1.2221	0.927	1.00821	0.84708-1.20000	0.815	0.98431	0.86213-1.12382	0.415	0.84056	0.56015-1.26136	0.794	1.02373	0.86094-1.21731	-0.02343	0.45061	0.578	13.505	15	0.56335	12.9027	14	0.5342
ebi-a-GCST90001877	17	0.773	1.02433	0.87247-1.2026	0.655	0.97428	0.86904-1.09226	0.816	0.98812	0.89357-1.09267	0.816	1.02377	0.84290-1.24343	0.77	0.98539	0.89426-1.08580	-0.024	0.57557	0.19	23.0438	16	0.11257	22.5513	15	0.09414
ebi-a-GCST90001441	20	0.405	0.81874	0.51705-1.2965	0.206	0.80278	0.57100-1.12864	0.816	0.97385	0.77889-1.21760	0.614	0.87556	0.52706-1.45450	0.304	0.82374	0.57473-1.18064	0.03738	0.40837	0.607	16.751	19	0.60673	16.0344	18	0.59015
ebi-a-GCST90001992	36	0.369	1.04185	0.95376-1.1381	0.387	1.04697	0.94355-1.16173	0.817	1.00868	0.93746-1.08532	0.862	0.98615	0.84358-1.15281	0.456	1.03581	0.94524-1.13505	-0.02953	0.20807	0.909	24.7669	35	0.90079	23.12	34	0.92085
ebi-a-GCST90001627	34	0.753	0.97122	0.81080-1.1634	0.671	0.96688	0.82763-1.12956	0.82	0.9863	0.87575-1.11080	0.508	0.92291	0.72951-1.16760	0.504	0.95086	0.82143-1.10069	0.00603	0.82349	0.156	41.6788	33	0.14291	41.613	32	0.11893
ebi-a-GCST90001824	22	0.69	1.12488	0.63576-1.9903	0.832	1.03113	0.77691-1.36854	0.823	1.02272	0.84038-1.24462	0.916	1.0289	0.60976-1.73617	0.986	1.00373	0.65946-1.52773	-0.01881	0.73116	0.482	20.2251	21	0.50705	20.1031	20	0.4515
ebi-a-GCST90001861	24	0.523	1.10938	0.81077-1.5180	0.279	1.13529	0.90210-1.42875	0.824	1.01878	0.86433-1.20083	0.648	0.90856	0.60537-1.36359	0.369	1.11931	0.87966-1.42426	-0.02793	0.53608	0.174	28.6984	23	0.19052	28.192	22	0.1694
ebi-a-GCST90001512	30	0.253	0.90778	0.77173-1.0678	0.334	0.93021	0.80317-1.07734	0.825	1.0141	0.89575-1.14809	0.445	0.92216	0.75116-1.13208	0.4	0.9409	0.81815-1.08207	0.06044	0.06062	0.117	39.8469	29	0.08647	35.0608	28	0.1681
ebi-a-GCST90001971	17	0.893	0.98568	0.80147-1.2122	0.939	0.99142	0.79600-1.23482	0.825	1.01834	0.86664-1.19658	0.819	0.95947	0.67671-1.36037	0.823	0.97874	0.81279-1.17857	0.01429	0.62907	0.795	11.9294	16	0.74883	11.6862	15	0.70261
ebi-a-GCST90002021	18	0.506	0.91222	0.70012-1.1886	0.5	0.9418	0.79119-1.12108	0.829	0.98571	0.86486-1.12345	0.945	0.98854	0.71608-1.36468	0.548	0.93079	0.74001-1.17075	0.03032	0.51856	0.62	14.6577	17	0.62012	14.222	16	0.58218
ebi-a-GCST90001980	23	0.83	0.97957	0.81309-1.1801	0.394	1.07842	0.90643-1.28303	0.829	1.01266	0.90317-1.13541	0.685	1.05633	0.81310-1.37230	0.395	1.08088	0.90673-1.28848	0.01596	0.65866	0.276	23.7879	22	0.35845	23.5626	21	0.31473
ebi-a-GCST90001538	32	0.557	0.97693	0.90444-1.0552	0.478	0.96776	0.88395-1.05953	0.836	0.99293	0.92832-1.06204	0.416	1.10631	0.86986-1.40705	0.642	0.98302	0.91524-1.05583	0.01748	0.39763	0.489	31.6654	31	0.43307	30.9067	30	0.42
ebi-a-GCST90001445	12	0.916	1.02868	0.61675-1.7157	0.772	1.05566	0.73143-1.52361	0.836	1.0295	0.78116-1.35678	0.849	1.06101	0.58486-1.92479	0.739	1.06887	0.72956-1.56598	0.00022	0.99712	0.326	13.6382	11	0.25366	13.6382	10	0.19014
ebi-a-GCST90002052	8	0.484	1.0817	0.87981-1.3299	0.859	0.98477	0.83175-1.16595	0.839	1.01342	0.89141-1.15212	0.839	0.97455	0.76637-1.23927	0.846	0.98295	0.83192-1.16140	-0.03998	0.46002	0.862	2.91807	7	0.89248	2.29519	6	0.89065
ebi-a-GCST90001626	21	0.119	0.76826	0.55977-1.0544	0.992	1.00147	0.75456-1.32917	0.84	1.02186	0.82888-1.25978	0.739	1.09099	0.65789-1.80921	0.439	0.88971	0.66592-1.18872	0.06635	0.03901	0.198	24.9087	20	0.20495	19.7889	19	0.40738
ebi-a-GCST90001417	25	0.592	1.06814	0.84221-1.3547	0.652	1.04881	0.85249-1.29035	0.841	1.01605	0.87012-1.18645	0.635	1.07221	0.80722-1.42420	0.674	1.05104	0.83594-1.32149	-0.01991	0.59155	0.872	17.2746	24	0.83672	16.9784	23	0.81031
ebi-a-GCST90001752	29	0.647	1.04516	0.86688-1.2601	0.611	1.04602	0.87959-1.24394	0.841	1.01299	0.89284-1.14931	0.326	0.83135	0.57896-1.19375	0.553	1.05271	0.89035-1.24467	-0.01118	0.6565	0.285	32.5751	28	0.25174	32.3329	27	0.21998
ebi-a-GCST90001680	21	0.82	1.03696	0.76243-1.4103	0.811	1.03149	0.80057-1.32901	0.841	0.98155	0.81798-1.17784	0.612	1.10171	0.76227-1.59231	0.822	1.0324	0.78522-1.35739	-0.01687	0.66881	0.72	16.4645	20	0.68742	16.2757	19	0.63881
ebi-a-GCST90001942	16	0.848	0.98833	0.87820-1.1123	0.891	0.99053	0.86502-1.13425	0.842	0.98978	0.89495-1.09465	0.782	0.96947	0.78173-1.20231	0.91	0.99295	0.87989-1.12054	0.00135	0.96368	0.868	10.5628	15	0.78292	10.5607	14	0.72015
ebi-a-GCST90001954	21	0.362	0.96424	0.89333-1.0408	0.671	1.01887	0.93459-1.11075	0.842	0.99411	0.93790-1.05369	0.429	0.93048	0.78110-1.10842	0.718	0.98831	0.92809-1.05244	0.03234	0.24168	0.77	15.0904	20	0.77121	13.6299	19	0.80482
ebi-a-GCST90001884	28	0.744	1.0306	0.86168-1.2326	0.985	0.99845	0.84529-1.17935	0.847	1.01053	0.90866-1.12383	0.884	0.98027	0.75201-1.27783	0.88	0.986	0.82192-1.18284	-0.00999	0.79116	0.846	19.584	27	0.84775	19.5125	26	0.81408
ebi-a-GCST90001531	23	0.585	1.02041	0.95001-1.0960	0.863	1.00738	0.92690-1.09485	0.85	1.00572	0.94807-1.06687	0.362	0.94691	0.84409-1.06226	0.96	0.99817	0.92981-1.07156	-0.01821	0.48856	0.73	17.5613	22	0.73166	17.0643	21	0.7072
ebi-a-GCST90001836	27	0.707	1.03675	0.86050-1.2491	0.499	1.06236	0.89137-1.26614	0.85	0.9886	0.87791-1.11324	0.186	1.22295	0.91490-1.63473	0.375	1.07122	0.92247-1.24396	-0.02353	0.51899	0.221	31.5589	26	0.20811	31.0279	25	0.1881
ebi-a-GCST90001768	24	0.926	1.01071	0.80975-1.2616	0.963	0.99582	0.83362-1.18958	0.853	1.01441	0.87234-1.17962	0.452	1.12172	0.83588-1.50530	0.684	1.03571	0.87657-1.22374	0.00166	0.96453	0.107	33.127	23	0.07888	33.124	22	0.06015
ebi-a-GCST90001863	19	0.543	0.84742	0.50236-1.4295	0.263	1.16481	0.89180-1.52138	0.854	1.02244	0.80786-1.29400	0.818	1.07504	0.58535-1.97439	0.651	1.09886	0.73496-1.64293	0.05355	0.44017	0.006	36.9687	18	0.00529	35.6582	17	0.00509
ebi-a-GCST90001661	25	0.606	0.943	0.75684-1.1750	0.573	0.93473	0.73909-1.18215	0.857	1.01339	0.87708-1.17088	0.964	0.99137	0.68663-1.43137	0.453	0.91422	0.72610-1.15110	0.02446	0.4036	0.52	22.9112	24	0.52505	22.1872	23	0.50898
ebi-a-GCST90001587	23	0.613	1.09852	0.76705-1.5732	0.309	1.15925	0.87208-1.54100	0.857	1.0184	0.83521-1.24177	0.243	1.39569	0.80961-2.40602	0.3	1.19348	0.86081-1.65470	-0.01776	0.62526	0.584	19.9428	22	0.58662	19.6971	21	0.54051
ebi-a-GCST90001404	27	0.354	1.08795	0.91317-1.2962	0.918	0.99005	0.81763-1.19883	0.857	1.01175	0.89071-1.14922	0.549	1.10166	0.80624-1.50532	0.797	1.02277	0.86282-1.21238	-0.03348	0.2473	0.958	15.8776	26	0.9391	14.4743	25	0.95282
ebi-a-GCST90001882	16	0.191	0.91098	0.79764-1.0404	0.495	0.96334	0.86540-1.07237	0.858	0.99189	0.90730-1.08436	0.895	0.98533	0.79383-1.22303	0.329	0.95032	0.86073-1.04924	0.05432	0.12585	0.275	18.8243	15	0.22181	15.8285	14	0.32396
ebi-a-GCST90001597	18	0.304	0.80117	0.53214-1.2062	0.32	1.17173	0.85765-1.60085	0.858	1.02099	0.81336-1.28162	0.405	1.23941	0.75701-2.02920	0.607	1.10638	0.75821-1.61444	0.0768	0.18615	0.377	18.5535	17	0.35476	16.5765	16	0.4135
ebi-a-GCST90002006	24	0.708	1.0326	0.87483-1.2188	0.913	0.98999	0.82613-1.18635	0.859	0.98932	0.87884-1.11368	0.507	1.10589	0.82521-1.48204	0.933	1.00761	0.84552-1.20078	-0.02299	0.47251	0.366	25.224	23	0.33884	24.6259	22	0.3153
ebi-a-GCST90001800	28	0.586	0.95251	0.80111-1.1325	0.635	0.95735	0.79953-1.14632	0.863	0.98928	0.87561-1.11771	0.735	1.05857	0.76384-1.46702	0.378	0.92686	0.78504-1.09430	0.01621	0.54584	0.298	30.8887	27	0.27573	30.45	26	0.24939
ebi-a-GCST90001662	16	0.756	0.98604	0.90401-1.0755	0.436	0.95996	0.86610-1.06399	0.863	0.99308	0.91762-1.07474	0.914	1.01126	0.82826-1.23470	0.691	0.98289	0.90418-1.06845	0.01088	0.70465	0.94	5.6199	15	0.98545	5.47022	14	0.97813
ebi-a-GCST90001480	25	0.397	1.10005	0.88575-1.3662	0.617	1.0505	0.86589-1.27448	0.863	0.98788	0.85978-1.13507	0.897	0.97537	0.67177-1.41619	0.317	1.12222	0.89938-1.40028	-0.04275	0.21769	0.68	18.9352	24	0.75544	17.3288	23	0.79281
ebi-a-GCST90001871	24	0.223	0.86904	0.69797-1.0821	0.871	0.98647	0.83723-1.16231	0.866	0.98921	0.87236-1.12172	0.837	0.9711	0.73686-1.27981	0.725	0.9613	0.77364-1.19449	0.05469	0.17552	0.098	31.7571	23	0.1053	29.1601	22	0.14035
ebi-a-GCST90001568	20	0.879	0.98453	0.80796-1.1997	0.55	0.93596	0.75350-1.16262	0.866	0.98734	0.85138-1.14501	0.873	1.02941	0.72589-1.45984	0.531	0.94147	0.78211-1.13330	0.00134	0.96647	0.694	15.469	19	0.69236	15.4672	18	0.62968
ebi-a-GCST90002101	13	0.74	1.12007	0.58229-2.1545	0.441	1.15032	0.80577-1.64221	0.867	1.02307	0.78406-1.33495	0.417	1.26865	0.72820-2.21020	0.459	1.19153	0.76044-1.86700	-0.02066	0.77196	0.824	7.68272	12	0.80941	7.59447	11	0.7491
ebi-a-GCST90001524	21	0.919	0.98983	0.81565-1.2012	0.916	0.99069	0.83331-1.17778	0.868	0.98977	0.87663-1.11752	0.717	0.94973	0.72131-1.25048	0.763	0.97211	0.81098-1.16525	-2e-05	0.99944	0.613	17.934	20	0.59176	17.934	19	0.52685
ebi-a-GCST90001876	17	0.575	0.96586	0.85763-1.0877	0.705	0.982	0.89389-1.07880	0.872	0.9934	0.91664-1.07659	0.235	0.87784	0.71377-1.07961	0.617	0.97839	0.89956-1.06414	0.02419	0.53164	0.284	20.3059	16	0.20676	19.7657	15	0.18111
ebi-a-GCST90001594	19	0.253	1.25825	0.86015-1.8406	0.697	0.948	0.72481-1.23991	0.874	1.01785	0.81866-1.26550	0.6	0.86862	0.51761-1.45767	0.563	0.88782	0.59767-1.31882	-0.05844	0.20436	0.115	24.9571	18	0.1261	22.6372	17	0.16144
ebi-a-GCST90001739	23	0.404	0.86666	0.62347-1.2047	0.773	0.96037	0.73006-1.26332	0.874	0.9848	0.81514-1.18977	0.791	0.94251	0.61170-1.45223	0.667	0.93012	0.67143-1.28850	0.03538	0.36353	0.851	15.6794	22	0.83147	14.8166	21	0.83204
ebi-a-GCST90001735	24	0.737	1.05563	0.77295-1.4417	0.917	1.0129	0.79596-1.28896	0.874	0.98592	0.82762-1.17450	0.824	0.9507	0.61184-1.47723	0.783	0.94073	0.61187-1.44632	-0.01881	0.6088	0.83	16.2375	23	0.84492	15.9679	22	0.81748
ebi-a-GCST90001436	28	0.432	1.06509	0.91234-1.2434	0.324	0.91123	0.75757-1.09606	0.875	0.99025	0.87615-1.11921	0.983	0.99574	0.68011-1.45786	0.809	1.02044	0.86720-1.20077	-0.03418	0.15333	0.316	27.8326	27	0.41965	25.6691	26	0.48141
ebi-a-GCST90001838	25	0.234	1.14614	0.92114-1.4261	0.187	1.12436	0.94466-1.33825	0.88	1.00942	0.89364-1.14020	0.775	1.05452	0.73539-1.51214	0.298	1.11109	0.91504-1.34914	-0.04339	0.18323	0.495	23.2573	24	0.50465	21.3744	23	0.55824
ebi-a-GCST90002102	27	0.557	0.96675	0.86480-1.0807	0.92	1.00607	0.89398-1.13222	0.88	0.9937	0.91506-1.07909	0.931	1.00882	0.82741-1.23001	0.824	1.01315	0.90378-1.13576	0.02714	0.47425	0.146	31.7865	26	0.20028	31.1292	25	0.18478
ebi-a-GCST90001843	18	0.243	1.12209	0.93123-1.3521	0.711	1.03386	0.86695-1.23290	0.881	0.99066	0.87636-1.11986	0.905	0.98295	0.74336-1.29975	0.499	1.05344	0.90887-1.22101	-0.0605	0.10137	0.557	15.4726	17	0.56148	12.451	16	0.71239
ebi-a-GCST90001496	27	0.827	1.01672	0.87732-1.1783	0.86	0.98542	0.83678-1.16046	0.881	1.00843	0.90369-1.12532	0.757	1.0432	0.80069-1.35916	0.732	0.97374	0.83769-1.13189	-0.00484	0.87199	0.741	21.8785	26	0.69533	21.852	25	0.64428
ebi-a-GCST90001926	27	0.558	0.88221	0.58347-1.3339	0.33	0.87446	0.66752-1.14556	0.883	0.9844	0.79780-1.21463	0.335	0.78598	0.48602-1.27105	0.294	0.79223	0.51708-1.21380	0.02799	0.54999	0.019	41.7576	26	0.026	41.1531	25	0.02212
ebi-a-GCST90001610	21	0.976	1.00603	0.68841-1.4702	0.845	1.02797	0.77939-1.35584	0.884	1.01441	0.83710-1.22929	0.747	1.07282	0.70429-1.63417	0.768	1.0467	0.77579-1.41221	0.00182	0.96085	0.893	13.3703	20	0.86094	13.3678	19	0.81922
ebi-a-GCST90001976	21	0.695	0.92084	0.61386-1.3813	0.851	0.97031	0.70815-1.32954	0.884	1.01535	0.82742-1.24597	0.304	1.28055	0.80868-2.02774	0.943	1.01301	0.71515-1.43493	0.02452	0.59071	0.668	16.9207	20	0.65812	16.6215	19	0.6155
ebi-a-GCST90002050	19	0.487	1.10448	0.83980-1.4526	0.999	0.99982	0.80944-1.23499	0.889	1.01018	0.87611-1.16478	0.481	0.86461	0.58163-1.28528	0.35	1.20571	0.82261-1.76722	-0.03682	0.46505	0.427	17.2837	18	0.50369	16.7251	17	0.47313
ebi-a-GCST90001475	21	0.836	0.97372	0.75884-1.2494	0.461	1.08721	0.87043-1.35797	0.89	0.98925	0.84894-1.15275	0.334	1.21115	0.82909-1.76927	0.332	1.12057	0.89514-1.40278	0.00531	0.87652	0.764	14.8451	20	0.7852	14.8203	19	0.73395
ebi-a-GCST90002080	22	0.491	1.09575	0.84875-1.4146	0.757	1.0427	0.79973-1.35947	0.89	1.01235	0.85063-1.20481	0.945	1.01471	0.67510-1.52516	0.655	1.05942	0.82516-1.36018	-0.02317	0.41636	0.54	20.2441	21	0.50585	19.5553	20	0.48604
ebi-a-GCST90002078	23	0.619	0.94529	0.75990-1.1759	0.62	0.95133	0.78104-1.15876	0.891	0.99034	0.86212-1.13763	0.753	0.94558	0.67064-1.33323	0.481	0.91978	0.73165-1.15630	0.01841	0.58996	0.304	24.4112	22	0.32605	24.0679	21	0.28978
ebi-a-GCST90001923	17	0.456	0.9356	0.78905-1.1094	0.787	0.97562	0.81562-1.16700	0.893	0.99103	0.86966-1.12934	0.375	0.86344	0.62995-1.18349	0.74	0.9731	0.83048-1.14022	0.02943	0.31845	0.577	15.2272	16	0.50807	14.1623	15	0.51326
ebi-a-GCST90002033	27	0.563	0.93402	0.74345-1.1734	0.172	0.8807	0.73385-1.05695	0.893	0.98936	0.84679-1.15593	0.854	1.03496	0.72029-1.48710	0.169	0.8787	0.73457-1.05111	0.0244	0.5014	0.037	41.6006	26	0.02698	40.8404	25	0.02386
ebi-a-GCST90002116	21	0.394	0.90878	0.73299-1.1267	0.465	0.93805	0.79027-1.11346	0.895	1.00941	0.87878-1.15947	0.911	1.01686	0.76078-1.35914	0.587	0.95213	0.80001-1.13318	0.04764	0.2297	0.103	28.6481	20	0.09492	26.5	19	0.11685
ebi-a-GCST90001983	16	0.626	1.22244	0.55527-2.6912	0.71	0.93938	0.67543-1.30648	0.897	1.01661	0.79310-1.30312	0.7	0.89301	0.50739-1.57171	0.726	0.88723	0.46028-1.71022	-0.03399	0.63596	0.241	17.6641	15	0.28073	17.3736	14	0.23682
ebi-a-GCST90001525	26	0.905	0.98756	0.80572-1.2104	0.634	0.95822	0.80401-1.14202	0.902	0.9926	0.88224-1.11677	0.32	1.20616	0.83984-1.73226	0.388	0.88188	0.66628-1.16725	0.00198	0.95203	0.441	25.1253	25	0.45537	25.1214	24	0.39919
ebi-a-GCST90002039	20	0.792	1.04148	0.77322-1.4028	0.519	1.07722	0.85929-1.35041	0.902	0.98846	0.82178-1.18896	0.994	1.0014	0.71727-1.39808	0.713	1.05074	0.81039-1.36237	-0.01968	0.66206	0.192	24.3654	19	0.18251	24.101	18	0.15175
ebi-a-GCST90002012	21	0.361	1.11312	0.88941-1.3931	0.235	1.12261	0.92749-1.35877	0.902	1.01009	0.86027-1.18602	0.158	0.76304	0.53137-1.09571	0.407	1.07506	0.90922-1.27115	-0.03761	0.24448	0.1	29.8716	20	0.07196	27.7636	19	0.08808
ebi-a-GCST90001520	28	0.528	1.03779	0.92632-1.1627	0.855	1.01119	0.89769-1.13903	0.903	1.00541	0.92163-1.09682	0.813	1.02085	0.86196-1.20903	0.789	1.01602	0.90559-1.13991	-0.02313	0.40305	0.734	23.1181	27	0.67865	22.3955	26	0.66687
ebi-a-GCST90001966	21	0.314	1.24402	0.82213-1.8824	0.828	0.96916	0.73047-1.28583	0.903	1.01489	0.79948-1.28834	0.18	0.69088	0.41028-1.16338	0.435	0.85211	0.57503-1.26272	-0.06312	0.25529	0.006	40.8074	20	0.00394	38.0518	19	0.00585
ebi-a-GCST90001527	28	0.308	1.07489	0.93810-1.2316	0.898	1.01043	0.86221-1.18412	0.904	1.00661	0.90466-1.12005	0.468	0.86415	0.58605-1.27423	0.234	1.09095	0.94842-1.25490	-0.04041	0.15207	0.032	41.1411	27	0.03992	37.9621	26	0.06105
ebi-a-GCST90001725	23	0.668	0.9662	0.82765-1.1279	0.846	1.01694	0.85884-1.20414	0.905	1.00739	0.89223-1.13740	0.111	0.72869	0.50154-1.05871	0.815	1.0178	0.87963-1.17766	0.02371	0.40379	0.735	18.7567	22	0.6603	18.0306	21	0.64706
ebi-a-GCST90001681	30	0.439	1.14255	0.81916-1.5936	0.653	1.0524	0.84217-1.31510	0.906	1.01096	0.84428-1.21055	0.632	1.09598	0.75591-1.58904	0.671	1.0635	0.80261-1.40920	-0.03593	0.39766	0.05	42.7141	29	0.04837	41.6175	28	0.04709
ebi-a-GCST90001522	18	0.603	0.93437	0.72728-1.2004	0.786	0.97188	0.79095-1.19420	0.906	0.99188	0.86587-1.13623	0.444	0.89068	0.66691-1.18952	0.549	0.9337	0.74936-1.16338	0.02403	0.58586	0.937	9.64283	17	0.91792	9.33362	16	0.89904
ebi-a-GCST90001497	21	0.987	1.0013	0.85529-1.1722	0.831	0.98213	0.83240-1.15880	0.907	1.00712	0.89425-1.13423	0.474	1.10579	0.84394-1.44888	0.641	0.96201	0.81958-1.12919	0.00386	0.91379	0.595	18.3211	20	0.56626	18.3091	19	0.50189
ebi-a-GCST90002055	17	0.975	1.00495	0.73934-1.3660	0.91	1.01386	0.79898-1.28653	0.908	0.98963	0.82956-1.18060	0.297	1.25435	0.83047-1.89460	0.643	1.05751	0.83870-1.33341	-0.00527	0.90467	0.394	17.7216	16	0.34045	17.7041	15	0.27854
ebi-a-GCST90001989	27	0.887	0.98924	0.85333-1.1468	0.728	1.02839	0.87839-1.20401	0.91	1.00565	0.91237-1.10846	0.383	1.12462	0.86765-1.45769	0.831	1.01569	0.88166-1.17011	0.00916	0.77431	0.56	21.8355	26	0.69766	21.7515	25	0.65005
ebi-a-GCST90001879	23	0.486	1.06818	0.89002-1.2820	0.668	1.03847	0.87391-1.23401	0.91	1.00636	0.90141-1.12353	0.613	1.08404	0.79614-1.47604	0.625	1.04416	0.88003-1.23889	-0.0241	0.42873	0.378	23.8915	22	0.35294	23.1729	21	0.33483
ebi-a-GCST90001760	22	0.822	1.02165	0.85013-1.2278	0.635	1.04819	0.86283-1.27336	0.911	0.99228	0.86681-1.13591	0.253	0.81749	0.58399-1.14435	0.981	1.00239	0.82771-1.21393	-0.01266	0.65106	0.848	14.0299	21	0.86831	13.8191	20	0.83955
ebi-a-GCST90001917	23	0.766	0.99064	0.93187-1.0531	0.996	1.00021	0.92932-1.07650	0.914	0.99698	0.94393-1.05301	0.302	1.06287	0.94920-1.19015	0.977	0.99911	0.94073-1.06112	0.01429	0.62751	0.145	29.2248	22	0.13855	28.8912	21	0.11664
ebi-a-GCST90001393	15	0.591	1.15823	0.68696-1.9528	0.552	1.11083	0.78547-1.57095	0.914	0.98453	0.74155-1.30714	0.778	0.91745	0.51038-1.64921	0.783	1.06356	0.69129-1.63630	-0.03363	0.47773	0.159	20.183	14	0.12448	19.3861	13	0.11161
ebi-a-GCST90001679	18	0.872	1.02243	0.78400-1.3334	0.879	1.01855	0.80314-1.29174	0.916	1.00914	0.85290-1.19401	0.867	1.03075	0.72606-1.46331	0.778	1.04019	0.79475-1.36143	-0.00488	0.90221	0.693	13.8973	17	0.67435	13.8818	16	0.60752
ebi-a-GCST90001579	17	0.444	1.07987	0.89167-1.3078	0.931	1.00961	0.81236-1.25477	0.916	1.00772	0.87320-1.16297	0.381	1.17884	0.82400-1.68647	0.861	1.01907	0.82812-1.25403	-0.03928	0.30295	0.647	13.5128	16	0.63496	12.3749	15	0.65046
ebi-a-GCST90001957	19	0.368	0.93985	0.82410-1.0719	0.645	0.97639	0.88212-1.08072	0.917	1.00432	0.92608-1.08917	0.244	1.16141	0.91017-1.48201	0.695	0.98043	0.88948-1.08069	0.04158	0.22557	0.628	14.9081	18	0.66827	13.3267	17	0.71405
ebi-a-GCST90001886	18	0.831	0.9836	0.84736-1.1417	0.953	0.99542	0.85468-1.15934	0.918	1.00581	0.90018-1.12383	0.698	0.96058	0.78673-1.17285	0.939	0.9944	0.86319-1.14555	0.01429	0.66615	0.714	14.1647	17	0.65541	13.9715	16	0.60083
ebi-a-GCST90002089	18	0.384	0.87995	0.66519-1.1640	0.511	0.93057	0.75085-1.15332	0.921	0.99109	0.82978-1.18375	0.969	0.993	0.69653-1.41566	0.704	0.95609	0.76123-1.20082	0.04422	0.29825	0.091	26.2448	17	0.07011	24.4764	16	0.0796
ebi-a-GCST90001804	32	0.445	1.08188	0.88657-1.3202	0.283	1.10656	0.91990-1.33110	0.924	1.00608	0.88904-1.13852	0.429	1.17465	0.79243-1.74125	0.278	1.11392	0.91965-1.34925	-0.02557	0.36797	0.382	32.9759	31	0.37064	32.0824	30	0.3637
ebi-a-GCST90001951	18	0.823	1.02302	0.84112-1.2443	0.71	0.97801	0.86994-1.09952	0.926	0.99515	0.89861-1.10205	0.755	1.03684	0.82898-1.29684	0.752	0.98052	0.86963-1.10557	-0.01512	0.74753	0.382	19.5739	17	0.2966	19.4435	16	0.24634
ebi-a-GCST90001434	16	0.81	1.06947	0.62449-1.8315	0.875	1.02633	0.74156-1.42046	0.929	1.01257	0.76875-1.33372	0.836	1.05597	0.63680-1.75106	0.806	1.04734	0.72891-1.50486	-0.01302	0.81784	0.067	25.5857	15	0.04261	25.4854	14	0.03007
ebi-a-GCST90001737	26	0.51	1.05647	0.89951-1.2408	0.69	1.03727	0.86679-1.24128	0.932	1.00551	0.88700-1.13985	0.143	0.74428	0.50750-1.09154	0.618	1.0446	0.88198-1.23720	-0.02528	0.34558	0.749	21.2264	25	0.67992	20.3007	24	0.67956
ebi-a-GCST90001726	26	0.593	1.05354	0.87224-1.2725	0.786	1.02355	0.86529-1.21076	0.932	0.99362	0.85841-1.15013	0.07	0.66419	0.43513-1.01383	0.79	1.01941	0.88597-1.17294	-0.03474	0.3452	0.085	37.5726	25	0.0509	36.1751	24	0.05278
ebi-a-GCST90002041	17	0.088	1.30393	0.98081-1.7335	0.362	1.10628	0.89025-1.37474	0.933	0.99349	0.85377-1.15607	0.533	1.12618	0.78166-1.62255	0.258	1.14994	0.91029-1.45267	-0.10108	0.043	0.598	13.4443	16	0.64003	8.55678	15	0.89953
ebi-a-GCST90001854	25	0.963	1.0048	0.82165-1.2288	0.501	1.05674	0.89990-1.24091	0.934	1.00497	0.89380-1.12997	0.927	0.98749	0.75703-1.28810	0.626	1.04359	0.88097-1.23622	7e-05	0.99837	0.542	22.2168	24	0.56633	22.2168	23	0.5072
ebi-a-GCST90002049	17	0.513	0.88951	0.63175-1.2524	0.957	0.9939	0.79463-1.24314	0.934	0.99264	0.83351-1.18216	0.972	1.00642	0.70843-1.42976	0.921	0.9858	0.74683-1.30125	0.04467	0.47389	0.288	19.5271	16	0.24228	18.8489	15	0.22066
ebi-a-GCST90001972	21	0.927	0.99194	0.83596-1.1770	0.982	1.00218	0.82813-1.21281	0.936	1.0055	0.88025-1.14856	0.763	1.04775	0.77687-1.41307	0.71	1.03395	0.86937-1.22969	0.00647	0.80737	0.644	17.5212	20	0.61892	17.4601	19	0.55873
ebi-a-GCST90001526	22	0.351	1.10683	0.89874-1.3631	0.171	1.12277	0.95111-1.32541	0.936	0.99561	0.89399-1.10879	0.467	0.8784	0.62324-1.23801	0.181	1.16293	0.93894-1.44035	-0.04463	0.25801	0.511	18.8148	21	0.59702	17.4593	20	0.62298
ebi-a-GCST90001905	16	0.828	0.9751	0.77975-1.2194	0.973	1.00358	0.81657-1.23342	0.937	1.00625	0.86300-1.17327	0.464	0.87119	0.60787-1.24858	0.977	0.99665	0.79453-1.25019	0.0171	0.70247	0.219	18.7874	15	0.22353	18.5856	14	0.1814
ebi-a-GCST90002093	16	0.593	0.93514	0.73537-1.1892	0.403	1.09664	0.88355-1.36110	0.941	0.99455	0.86083-1.14903	0.254	1.22175	0.87749-1.70108	0.318	1.15465	0.87877-1.51714	0.0292	0.53982	0.568	12.7764	15	0.61957	12.3814	14	0.5757
ebi-a-GCST90002023	13	0.1	0.68849	0.45830-1.0343	0.624	0.93841	0.72764-1.21023	0.941	0.99302	0.82388-1.19689	0.682	1.08328	0.74579-1.57349	0.681	0.93806	0.69662-1.26318	0.09665	0.07261	0.701	8.91751	12	0.70996	4.97623	11	0.93231
ebi-a-GCST90001906	20	0.455	1.16225	0.79026-1.7093	0.294	1.14876	0.88669-1.48831	0.942	0.9917	0.79112-1.24313	0.562	1.1197	0.76924-1.62982	0.306	1.16274	0.87792-1.53995	-0.04609	0.33291	0.048	30.7944	19	0.04252	29.1889	18	0.04612
ebi-a-GCST90001557	18	0.521	0.87685	0.59229-1.2981	0.48	0.90639	0.68989-1.19084	0.944	0.992	0.79438-1.23880	0.893	0.96775	0.60352-1.55180	0.509	0.90861	0.68780-1.20032	0.043	0.46266	0.192	22.8876	17	0.15295	22.1052	16	0.13983
ebi-a-GCST90001757	29	0.882	0.99472	0.92845-1.0657	0.66	0.98447	0.91824-1.05548	0.944	0.99777	0.93801-1.06135	0.378	1.11727	0.87635-1.42442	0.939	0.99777	0.94306-1.05565	0.00469	0.83378	0.238	35.6188	28	0.15256	35.5597	27	0.12525
ebi-a-GCST90001536	26	0.513	1.04307	0.92101-1.1813	0.221	1.09607	0.94634-1.26950	0.944	1.00364	0.90710-1.11045	0.658	0.93116	0.68136-1.27254	0.411	1.06067	0.92382-1.21780	-0.02546	0.30798	0.636	19.894	25	0.75236	18.8091	24	0.76209
ebi-a-GCST90001990	19	0.569	1.17298	0.68454-2.0099	0.71	1.05701	0.78932-1.41550	0.944	1.00834	0.79866-1.27307	0.57	1.1619	0.69922-1.93076	0.478	1.18245	0.75110-1.86152	-0.03159	0.54791	0.237	22.5734	18	0.20752	22.085	17	0.18147
ebi-a-GCST90001559	18	0.567	1.10597	0.78915-1.5500	0.241	1.15014	0.91055-1.45276	0.945	0.9922	0.79408-1.23977	0.373	0.80942	0.51443-1.27358	0.29	1.13357	0.90519-1.41958	-0.03959	0.41078	0.015	32.4077	17	0.01338	31.0245	16	0.01336
ebi-a-GCST90001667	28	0.971	0.99805	0.89882-1.1082	0.674	1.02324	0.91927-1.13896	0.947	1.00307	0.91713-1.09706	0.143	1.15024	0.95880-1.37991	0.817	1.01035	0.92695-1.10127	0.00542	0.85011	0.108	38.3668	27	0.07225	38.3131	26	0.05662
ebi-a-GCST90001728	23	0.326	1.0691	0.93858-1.2178	0.854	0.98791	0.86797-1.12443	0.947	0.99689	0.90871-1.09362	0.854	1.02119	0.81833-1.27435	0.747	1.02119	0.90056-1.15799	-0.05645	0.14911	0.753	16.7999	22	0.77431	14.557	21	0.84451
ebi-a-GCST90001430	30	0.961	1.00369	0.86623-1.1630	0.897	0.98927	0.84061-1.16423	0.948	0.99604	0.88469-1.12139	0.899	0.98093	0.73114-1.31607	0.959	0.99651	0.87412-1.13603	-0.00376	0.86499	0.892	20.0138	29	0.8925	19.9843	28	0.86504
ebi-a-GCST90001925	24	0.301	1.19536	0.85921-1.6630	0.999	1.00023	0.77531-1.29041	0.95	1.00571	0.84093-1.20279	0.863	0.95763	0.58967-1.55521	0.824	0.95763	0.65677-1.39631	-0.04847	0.23531	0.536	21.6233	23	0.54308	20.1345	22	0.57463
ebi-a-GCST90001943	20	0.849	0.98931	0.88735-1.1030	0.965	0.99723	0.88181-1.12777	0.952	1.00274	0.91739-1.09602	0.646	0.95928	0.80548-1.14243	0.961	1.00269	0.90207-1.11454	0.01404	0.67792	0.663	17.3278	19	0.56767	17.1496	18	0.51284
ebi-a-GCST90001640	6	0.974	0.96246	0.10874-8.5186	0.534	0.84134	0.48783-1.45101	0.954	1.01541	0.60497-1.70430	0.457	0.75093	0.37405-1.50758	0.512	0.79773	0.42569-1.49493	0.00896	0.96257	0.247	7.64511	5	0.17691	7.64035	4	0.10568
ebi-a-GCST90001830	14	0.713	0.93183	0.64493-1.3463	0.855	0.9727	0.72309-1.30847	0.955	0.99365	0.79715-1.23860	0.706	0.92012	0.60283-1.40442	0.666	0.92573	0.65718-1.30402	0.02306	0.67681	0.953	6.1881	13	0.93904	6.00562	12	0.9158
ebi-a-GCST90002054	14	0.614	0.87279	0.52158-1.4605	0.723	0.94752	0.70305-1.27701	0.955	1.00638	0.80700-1.25501	0.747	0.92622	0.58751-1.46019	0.762	0.94635	0.66709-1.34252	0.03852	0.55729	0.337	14.4943	13	0.33997	14.0671	12	0.29644
ebi-a-GCST90001873	17	0.814	0.9792	0.82443-1.1630	0.865	0.98538	0.83131-1.16800	0.957	0.99695	0.89305-1.11294	0.842	1.02757	0.79039-1.33592	0.963	1.00411	0.84648-1.19111	0.00932	0.79361	0.633	14.4358	16	0.56628	14.3649	15	0.49805
ebi-a-GCST90001958	14	0.736	0.96691	0.79858-1.1707	0.79	0.97429	0.80402-1.18061	0.957	1.00387	0.87120-1.15674	0.686	0.94436	0.71978-1.23901	0.753	0.9708	0.81025-1.16315	0.01761	0.57617	0.589	12.4048	13	0.49476	12.0726	12	0.43987
ebi-a-GCST90001491	22	0.767	1.01674	0.91214-1.1333	0.884	0.99164	0.88610-1.10974	0.958	0.99785	0.92062-1.08155	0.562	0.95249	0.81010-1.11990	0.999	1.00007	0.90507-1.10503	-0.01358	0.61898	0.931	12.7673	21	0.91656	12.5121	20	0.89732
ebi-a-GCST90002036	26	0.529	0.93767	0.76978-1.1422	0.919	0.98949	0.80626-1.21435	0.96	0.99645	0.86608-1.14643	0.698	1.05918	0.79500-1.41115	0.977	1.00271	0.83328-1.20659	0.02659	0.39665	0.309	27.9279	25	0.31118	27.0872	24	0.30041
ebi-a-GCST90001511	23	0.596	0.94436	0.76687-1.1629	0.438	0.92575	0.76185-1.12492	0.961	0.99628	0.85927-1.15513	0.811	0.95646	0.66656-1.37244	0.272	0.90205	0.75391-1.07930	0.02913	0.47691	0.138	28.2618	22	0.16717	27.5731	21	0.15268
ebi-a-GCST90002063	28	0.501	0.93907	0.78409-1.1247	0.619	0.95924	0.81421-1.13010	0.963	1.00313	0.87912-1.14463	0.631	1.0777	0.79677-1.45769	0.441	0.94037	0.80604-1.09709	0.03367	0.30347	0.031	40.9892	27	0.04128	39.3224	26	0.0454
ebi-a-GCST90001611	16	0.924	0.97545	0.58918-1.6150	0.859	1.0269	0.76675-1.37532	0.965	1.00486	0.80668-1.25174	0.843	1.05124	0.64707-1.70785	0.849	1.03183	0.75123-1.41725	0.00596	0.89973	0.729	11.9868	15	0.68003	11.9703	14	0.60869
ebi-a-GCST90001596	28	0.393	1.08813	0.89920-1.3168	0.638	1.05159	0.85302-1.29639	0.969	0.99726	0.86647-1.14779	0.128	0.70265	0.45226-1.09168	0.592	1.05661	0.86582-1.28943	-0.04275	0.20275	0.39	28.9937	27	0.36121	27.2069	26	0.39855
ebi-a-GCST90002013	13	0.849	0.98187	0.81675-1.1804	0.992	1.00088	0.85080-1.17743	0.97	1.00267	0.87405-1.15023	0.541	1.07574	0.85706-1.35023	0.966	1.0034	0.86160-1.16853	0.01428	0.73098	0.437	13.7815	12	0.31488	13.6274	11	0.2543
ebi-a-GCST90001450	18	0.131	1.20951	0.95693-1.5288	0.866	1.02286	0.78743-1.32866	0.971	0.99663	0.83305-1.19232	0.236	0.73209	0.44517-1.20393	0.191	1.21848	0.91715-1.61882	-0.07358	0.04007	0.083	23.7588	17	0.12614	18.1083	16	0.31759
ebi-a-GCST90001408	27	0.892	0.98859	0.83894-1.1649	0.784	1.02605	0.85376-1.23311	0.972	1.00223	0.88635-1.13327	0.656	0.93376	0.69294-1.25829	0.819	0.9812	0.83545-1.15237	0.00656	0.80246	0.5	26.4921	26	0.43633	26.4245	25	0.38523
ebi-a-GCST90002111	15	0.648	0.93389	0.70114-1.2439	0.857	0.98368	0.82242-1.17656	0.972	0.99759	0.87320-1.13970	0.268	1.17744	0.89201-1.55419	0.865	0.98101	0.78966-1.21873	0.02142	0.61892	0.91	7.58943	14	0.9096	7.3298	13	0.88437
ebi-a-GCST90001608	21	0.735	1.10101	0.63598-1.9061	0.541	0.90551	0.65844-1.24528	0.972	0.99575	0.78470-1.26357	0.54	0.82612	0.45299-1.50659	0.648	0.91372	0.62417-1.33758	-0.02525	0.69335	0.119	27.7986	20	0.11425	27.5661	19	0.09214
ebi-a-GCST90001973	24	0.832	1.01496	0.88611-1.1626	0.892	0.98928	0.84677-1.15578	0.972	1.00189	0.90036-1.11488	0.84	1.02737	0.79254-1.33177	0.846	0.98222	0.82164-1.17417	-0.00842	0.76452	0.912	13.1897	23	0.94776	13.0977	22	0.9304
ebi-a-GCST90001868	11	0.039	1.39094	1.06417-1.8181	0.263	1.1106	0.92427-1.33449	0.975	1.0029	0.83485-1.20477	0.535	1.13874	0.76600-1.69284	0.251	1.1202	0.93339-1.34438	-0.14073	0.01857	0.2	15.4949	10	0.11503	7.27555	9	0.60845
ebi-a-GCST90001578	24	0.862	0.96259	0.62955-1.4718	0.673	1.0683	0.78565-1.45263	0.977	1.003	0.81447-1.23517	0.864	0.95294	0.55190-1.64539	0.904	1.03237	0.61778-1.72518	0.00839	0.82958	0.85	15.7818	23	0.86445	15.7343	22	0.82885
ebi-a-GCST90001933	26	0.801	0.98375	0.86726-1.1159	0.935	0.99418	0.86400-1.14397	0.978	1.00135	0.90845-1.10375	0.833	1.02074	0.84503-1.23299	0.988	0.99914	0.89097-1.12044	0.01282	0.66802	0.765	20.3421	25	0.72866	20.1536	24	0.68801
ebi-a-GCST90001563	4	0.87	0.96992	0.70223-1.3396	0.995	1.00076	0.76856-1.30311	0.981	1.00265	0.80736-1.24517	0.475	0.83407	0.53875-1.29127	0.649	1.07172	0.81889-1.40260	0.03332	0.81138	0.584	1.90459	3	0.59244	1.83081	2	0.40035
ebi-a-GCST90001929	22	0.749	0.96226	0.76298-1.2136	0.484	0.93672	0.78000-1.12493	0.982	1.00188	0.85154-1.17876	0.076	1.50186	0.98020-2.30113	0.501	0.9394	0.78556-1.12336	0.01701	0.63191	0.088	32.2993	21	0.05459	31.9215	20	0.04414
ebi-a-GCST90001683	13	0.277	1.19299	0.88170-1.6142	0.588	1.08688	0.80423-1.46887	0.982	0.99751	0.80329-1.23869	0.673	1.10827	0.69597-1.76482	0.465	1.12075	0.83343-1.50711	-0.06494	0.12469	0.742	8.90359	12	0.71114	6.14096	11	0.86379
ebi-a-GCST90001775	26	0.723	0.97432	0.84520-1.1232	0.48	1.05679	0.90663-1.23180	0.983	0.99876	0.89058-1.12008	0.59	0.92696	0.70614-1.21683	0.59	1.0378	0.90820-1.18590	0.0175	0.55922	0.194	31.1978	25	0.18255	30.7484	24	0.16117
ebi-a-GCST90001581	20	0.817	1.02782	0.81784-1.2917	0.855	1.01983	0.82642-1.25850	0.983	1.00178	0.84900-1.18205	0.66	0.92251	0.64759-1.31414	0.989	1.00136	0.82484-1.21566	-0.01283	0.74659	0.114	27.922	19	0.08494	27.7559	18	0.06587
ebi-a-GCST90001862	16	0.528	0.94247	0.78755-1.1278	0.728	1.0327	0.86157-1.23783	0.986	1.0012	0.87573-1.14464	0.658	1.0654	0.80899-1.40309	0.809	1.02427	0.84623-1.23975	0.03621	0.33887	0.658	12.6101	15	0.63238	11.6296	14	0.63602
ebi-a-GCST90002062	22	0.553	0.90087	0.64206-1.2640	0.771	0.96293	0.74685-1.24152	0.986	0.99847	0.83608-1.19240	0.327	0.79811	0.51369-1.24002	0.74	0.94456	0.67712-1.31763	0.02811	0.49058	0.35	22.5844	21	0.36653	22.0409	20	0.3383
ebi-a-GCST90002088	27	0.509	1.07596	0.86831-1.3333	0.993	1.00092	0.80882-1.23865	0.987	0.99876	0.86384-1.15474	0.12	1.39721	0.92978-2.09964	0.932	1.0114	0.78155-1.30886	-0.03099	0.36297	0.282	29.4244	26	0.29214	28.4473	25	0.28768
ebi-a-GCST90001770	7	0.499	1.12907	0.81433-1.5655	0.753	1.04894	0.77936-1.41177	0.987	0.99799	0.78764-1.26450	0.768	1.06177	0.72613-1.55255	0.744	1.0551	0.77629-1.43403	-0.05172	0.33206	0.958	1.54849	6	0.95621	0.39587	5	0.99544
ebi-a-GCST90001952	20	0.818	0.98415	0.86080-1.1252	0.73	0.98145	0.88232-1.09171	0.987	1.00074	0.91705-1.09207	0.21	1.19759	0.91223-1.57222	0.748	0.9814	0.87676-1.09853	0.00876	0.75047	0.823	12.7545	19	0.8509	12.6502	18	0.81192
ebi-a-GCST90001607	18	0.108	0.55985	0.28684-1.0927	0.674	0.93663	0.69032-1.27081	0.988	1.00193	0.77167-1.30088	0.523	0.83614	0.48858-1.43093	0.457	0.85867	0.57993-1.27139	0.10964	0.08549	0.075	27.0229	17	0.05773	22.3333	16	0.13275
ebi-a-GCST90001412	23	0.778	0.94487	0.64008-1.3948	0.828	1.03465	0.76034-1.40794	0.989	1.00162	0.79627-1.25994	0.381	0.7822	0.45648-1.34035	0.854	0.97169	0.71803-1.31498	0.01483	0.71702	0.085	32.9825	22	0.06212	32.7719	21	0.04881
ebi-a-GCST90001850	27	0.84	1.02634	0.79924-1.3180	0.455	1.08166	0.88024-1.32917	0.989	1.00097	0.86923-1.15269	0.627	1.08014	0.79441-1.46862	0.319	1.13448	0.88948-1.44697	-0.00792	0.81356	0.512	25.3804	26	0.49753	25.3229	25	0.4444
ebi-a-GCST90002032	20	0.57	0.95711	0.82515-1.1102	0.815	0.98643	0.87967-1.10615	0.989	1.00069	0.90520-1.10625	0.983	1.00301	0.75919-1.32513	0.855	0.98934	0.88324-1.10819	0.02025	0.43522	0.961	9.81631	19	0.95733	9.17934	18	0.95544
ebi-a-GCST90001889	24	0.793	1.02502	0.85404-1.2302	0.803	1.02032	0.87143-1.19465	0.991	1.00076	0.87186-1.14872	0.62	1.06036	0.84398-1.33222	0.713	1.0274	0.89123-1.18437	-0.01509	0.69079	0.036	38.6202	23	0.02183	38.3371	22	0.01679
ebi-a-GCST90001545	11	0.781	0.9039	0.45297-1.8037	0.428	1.13698	0.82747-1.56224	0.995	1.00119	0.70553-1.42074	0.224	1.34109	0.86006-2.09116	0.475	1.15078	0.79450-1.66683	0.03003	0.7401	0.017	25.2513	10	0.00489	24.9271	9	0.00305
