# Supplementary material
Source: Frontiers journal article supplement (https://www.frontiersin.org/articles/1413183)
Supplement: Table_2.xlsx [file Table_2.xlsx]

## Sheet: Table of Contents
Table of Contents
S2.1 The IVs SNPs involved in immune cells phenotypes to abdominal aortic aneuryme (AAA) of FinnGen database.
S2.2 The IVs SNPs involved in immune cells phenotypes to AAA of UK Biobank database.
S2.3 The single SNP's effect estimated in immune cells phenotypes to AAA of FinnGen database.
S2.4 The single SNP's effect estimated in immune cells phenotypes to AAA of UK Biobank database.

## Sheet: S2.1
The IVs SNPs involved in immune cells phenotypes to abdominal aortic aneuryme (AAA) of FinnGen database.
id	SNP	effect_allele.exposure	other_allele.exposure	effect_allele.outcome	other_allele.outcome	beta.exposure	beta.outcome	eaf.exposure	remove	palindromic	ambiguous	id.outcome	pos.outcome	pval.outcome	se.outcome	outcome	mr_keep.outcome	pval_origin.outcome	data_source.outcome	pval.exposure	chr.exposure	pos.exposure	samplesize.exposure	se.exposure	mr_keep.exposure	pval_origin.exposure	data_source.exposure	action	mr_keep	R2	f	meanf
GCST90001391	rs10226722	C	T	C	T	0.1184	0.0102556	0.6006	FALSE	FALSE	FALSE	nW7z2A	68560708	0.674005	0.0243799	outcome	TRUE	reported	textfile	3.83698e-06	7	68025695	3658	0.0256	TRUE	reported	igd	2	TRUE	0.00581363	21.3789	22.4173
	rs11068290	T	C	T	C	0.3904	-0.0508669	0.0231	FALSE	FALSE	FALSE	nW7z2A	109790250	0.454404	0.0679954	outcome	TRUE	reported	textfile	1.486e-06	12	110228055	3658	0.08097	TRUE	reported	igd	2	TRUE	0.00631504	23.2345	22.4173
	rs11616703	T	G	T	G	-0.4199	0.0182952	0.0171	FALSE	FALSE	FALSE	nW7z2A	22305590	0.798759	0.071759	outcome	TRUE	reported	textfile	8.75105e-06	13	22879729	3658	0.09432	TRUE	reported	igd	2	TRUE	0.00538882	19.8083	22.4173
	rs12204136	C	T	C	T	0.2426	-0.0660706	0.0522	FALSE	FALSE	FALSE	nW7z2A	91081363	0.25178	0.0576514	outcome	TRUE	reported	textfile	9.99793e-06	6	91791081	3658	0.05485	TRUE	reported	igd	2	TRUE	0.00531947	19.552	22.4173
	rs138919897	G	A	G	A	1.402	-0.122105	0.0019	FALSE	FALSE	FALSE	nW7z2A	107115948	0.345358	0.129399	outcome	TRUE	reported	textfile	2.986e-06	3	106834795	3658	0.2997	TRUE	reported	igd	2	TRUE	0.00594687	21.8718	22.4173
	rs140191306	T	C	T	C	0.4421	0.32811	0.0179	FALSE	FALSE	FALSE	nW7z2A	2570753	0.0332751	0.154133	outcome	TRUE	reported	textfile	2.427e-06	9	2570753	3658	0.09364	TRUE	reported	igd	2	TRUE	0.0060567	22.2782	22.4173
	rs148496020	A	T	A	T	-0.4088	-0.186913	0.0193	FALSE	TRUE	TRUE	nW7z2A	53014641	0.358634	0.203615	outcome	TRUE	reported	textfile	4.74799e-06	17	51092001	3658	0.08921	TRUE	reported	igd	2	FALSE	0.00570775	20.9873	22.4173
	rs17405603	T	A	T	A	0.1542	-0.0259277	0.284	FALSE	TRUE	TRUE	nW7z2A	145228777	0.319363	0.0260378	outcome	TRUE	reported	textfile	2.38298e-08	5	144608340	3658	0.02757	TRUE	reported	igd	2	FALSE	0.00847917	31.2649	22.4173
	rs2450220	T	C	T	C	-0.152	0.0362326	0.816	FALSE	FALSE	FALSE	nW7z2A	118311162	0.451678	0.048142	outcome	TRUE	reported	textfile	1.65299e-06	8	119323401	3658	0.03167	TRUE	reported	igd	2	TRUE	0.00625779	23.0226	22.4173
	rs4691917	G	A	G	A	0.9378	0.198532	0.9956	FALSE	FALSE	FALSE	nW7z2A	163423643	0.00517714	0.0710109	outcome	TRUE	reported	textfile	6.10394e-07	4	164344795	3658	0.1877	TRUE	reported	igd	2	TRUE	0.00677789	24.9491	22.4173
	rs56209800	T	A	T	A	-0.2355	-0.0117861	0.0547	FALSE	TRUE	TRUE	nW7z2A	237651652	0.761709	0.0388675	outcome	TRUE	reported	textfile	7.90806e-06	2	238560295	3658	0.05263	TRUE	reported	igd	2	FALSE	0.00544378	20.0114	22.4173
	rs62057183	T	C	T	C	0.1273	0.0317883	0.2508	FALSE	FALSE	FALSE	nW7z2A	30733505	0.327095	0.0324377	outcome	TRUE	reported	textfile	9.63496e-06	16	30744826	3658	0.02872	TRUE	reported	igd	2	TRUE	0.00534217	19.6359	22.4173
	rs72757888	T	C	T	C	0.5864	-0.0365309	0.01	FALSE	FALSE	FALSE	nW7z2A	232910217	0.469337	0.050488	outcome	TRUE	reported	textfile	1.086e-06	1	233045963	3658	0.1201	TRUE	reported	igd	2	TRUE	0.00647496	23.8267	22.4173
	rs72952600	G	C	G	C	0.49	-0.097615	0.0142	FALSE	TRUE	TRUE	nW7z2A	114201445	0.180892	0.0729553	outcome	TRUE	reported	textfile	2.83302e-06	6	114522609	3658	0.1045	TRUE	reported	igd	2	FALSE	0.00597466	21.9747	22.4173
	rs73426855	C	T	C	T	-0.174	0.0196318	0.1471	FALSE	FALSE	FALSE	nW7z2A	79663261	0.492725	0.0286186	outcome	TRUE	reported	textfile	6.07995e-07	17	77637123	3658	0.03482	TRUE	reported	igd	2	TRUE	0.0067802	24.9576	22.4173
	rs7597061	G	T	G	T	0.1829	-0.00246311	0.0998	FALSE	FALSE	FALSE	nW7z2A	65774712	0.941426	0.0335217	outcome	TRUE	reported	textfile	9.66696e-06	2	66001846	3658	0.04129	TRUE	reported	igd	2	TRUE	0.00533544	19.611	22.4173
	rs9265870	G	A	G	A	0.1454	0.0826321	0.4718	FALSE	FALSE	FALSE	nW7z2A	31345115	0.0049768	0.0294218	outcome	TRUE	reported	textfile	1.92398e-06	6	31312892	3658	0.03049	TRUE	reported	igd	2	TRUE	0.00617844	22.7288	22.4173
GCST90001392	rs10265656	G	A	G	A	-0.2229	0.0618459	0.9375	FALSE	FALSE	FALSE	g41BLd	187171	0.241385	0.0527907	outcome	TRUE	reported	textfile	6.15106e-06	7	187171	3656	0.04923	TRUE	reported	igd	2	TRUE	0.00557604	20.4891	22.8834
	rs10821937	T	C	T	C	-0.1118	0.015908	0.6458	FALSE	FALSE	FALSE	g41BLd	61964150	0.560387	0.0273208	outcome	TRUE	reported	textfile	8.81089e-06	10	63723909	3656	0.02511	TRUE	reported	igd	2	TRUE	0.00539306	19.8131	22.8834
	rs11068290	T	C	T	C	0.3555	-0.0508669	0.0231	FALSE	FALSE	FALSE	g41BLd	109790250	0.454404	0.0679954	outcome	TRUE	reported	textfile	5.55098e-06	12	110228055	3656	0.07815	TRUE	reported	igd	2	TRUE	0.00562813	20.6816	22.8834
	rs11159480	T	G	T	G	-0.1526	-0.0395518	0.8166	FALSE	FALSE	FALSE	g41BLd	81000318	0.285367	0.0370217	outcome	TRUE	reported	textfile	2.399e-06	14	81466662	3656	0.0323	TRUE	reported	igd	2	TRUE	0.00606812	22.3083	22.8834
	rs113965271	C	G	C	G	-0.3262	0.132737	0.0286	FALSE	TRUE	TRUE	g41BLd	127670776	0.0441601	0.0659541	outcome	TRUE	reported	textfile	6.28507e-06	2	128428350	3656	0.07211	TRUE	reported	igd	2	FALSE	0.00556604	20.4522	22.8834
	rs116104104	T	C	T	C	5.387	0.0641339	0.0004	FALSE	FALSE	FALSE	g41BLd	214302917	0.451483	0.0851774	outcome	TRUE	reported	textfile	5.50503e-06	1	214476260	3656	1.184	TRUE	reported	igd	2	TRUE	0.00563031	20.6896	22.8834
	rs116285595	T	C	T	C	0.6503	0.0761377	0.0068	FALSE	FALSE	FALSE	g41BLd	200889031	0.730478	0.221016	outcome	TRUE	reported	textfile	4.44396e-06	1	200858159	3656	0.1415	TRUE	reported	igd	2	TRUE	0.0057439	21.1095	22.8834
	rs117772462	A	T	A	T	-0.4238	-0.145778	0.0159	FALSE	TRUE	TRUE	g41BLd	48751421	0.346094	0.154722	outcome	TRUE	reported	textfile	8.67401e-06	7	48791017	3656	0.09514	TRUE	reported	igd	2	FALSE	0.00539807	19.8316	22.8834
	rs118090735	G	T	G	T	1.518	-0.121485	0.0011	FALSE	FALSE	FALSE	g41BLd	78396688	0.254159	0.106537	outcome	TRUE	reported	textfile	8.22602e-06	12	78790468	3656	0.3399	TRUE	reported	igd	2	TRUE	0.0054259	19.9344	22.8834
	rs12036556	T	C	T	C	0.3487	-0.0723579	0.0265	FALSE	FALSE	FALSE	g41BLd	98683814	0.391359	0.0844163	outcome	TRUE	reported	textfile	2.714e-06	1	99149370	3656	0.07421	TRUE	reported	igd	2	TRUE	0.00600286	22.0669	22.8834
	rs12939565	T	A	T	A	-0.1364	-0.0418282	0.4267	FALSE	TRUE	TRUE	g41BLd	39882136	0.0757809	0.0235558	outcome	TRUE	reported	textfile	3.47496e-07	17	38038389	3656	0.02672	TRUE	reported	igd	2	FALSE	0.00707726	26.0446	22.8834
	rs1294253	C	T	C	T	-0.1382	-0.00151751	0.7254	FALSE	FALSE	FALSE	g41BLd	233368129	0.959785	0.0300957	outcome	TRUE	reported	textfile	2.1e-07	1	233503875	3656	0.02658	TRUE	reported	igd	2	TRUE	0.00734007	27.019	22.8834
	rs140380950	C	T	C	T	-0.3568	-0.0128184	0.0368	FALSE	FALSE	FALSE	g41BLd	104971345	0.958707	0.247576	outcome	TRUE	reported	textfile	1.567e-08	2	105587803	3656	0.06296	TRUE	reported	igd	2	TRUE	0.00870795	32.0983	22.8834
	rs143397127	C	T	C	T	-0.4626	0.269617	0.0157	FALSE	FALSE	FALSE	g41BLd	12807766	0.403168	0.322517	outcome	TRUE	reported	textfile	1.41599e-06	7	12847391	3656	0.09576	TRUE	reported	igd	2	TRUE	0.00634269	23.3241	22.8834
	rs146959444	C	T	C	T	1.249	0.0559682	0.0023	FALSE	FALSE	FALSE	g41BLd	167058031	0.510974	0.0851458	outcome	TRUE	reported	textfile	1.287e-06	1	167027268	3656	0.2574	TRUE	reported	igd	2	TRUE	0.00639902	23.5326	22.8834
	rs16868356	C	T	C	T	0.4146	0.277648	0.0198	FALSE	FALSE	FALSE	g41BLd	101758236	0.0616325	0.14856	outcome	TRUE	reported	textfile	1.226e-06	8	102770464	3656	0.08532	TRUE	reported	igd	2	TRUE	0.00641734	23.6004	22.8834
	rs1919856	G	A	G	A	0.1675	-0.0394517	0.108	FALSE	FALSE	FALSE	g41BLd	247537604	0.464863	0.0539797	outcome	TRUE	reported	textfile	8.94499e-06	1	247700906	3656	0.03766	TRUE	reported	igd	2	TRUE	0.0053817	19.7711	22.8834
	rs2395904	G	T	G	T	-0.1279	0.000463352	0.2657	FALSE	FALSE	FALSE	g41BLd	129605573	0.986168	0.026727	outcome	TRUE	reported	textfile	1.69001e-06	8	130617819	3656	0.02666	TRUE	reported	igd	2	TRUE	0.00625589	23.0029	22.8834
	rs374727947	G	T	G	T	0.6111	0.0663625	0.0098	FALSE	FALSE	FALSE	g41BLd	164084133	0.597492	0.125684	outcome	TRUE	reported	textfile	3.02197e-06	3	163801921	3656	0.1307	TRUE	reported	igd	2	TRUE	0.00594399	21.8492	22.8834
	rs61878035	A	G	A	G	0.1453	0.0414131	0.1886	FALSE	FALSE	FALSE	g41BLd	15307352	0.143669	0.0283212	outcome	TRUE	reported	textfile	2.24202e-06	11	15328898	3656	0.03068	TRUE	reported	igd	2	TRUE	0.00609759	22.4173	22.8834
	rs7169431	G	A	G	A	-0.2007	0.0168976	0.9219	FALSE	FALSE	FALSE	g41BLd	56048698	0.744087	0.0517624	outcome	TRUE	reported	textfile	5.45896e-06	15	56340896	3656	0.04408	TRUE	reported	igd	2	TRUE	0.00563832	20.7192	22.8834
	rs733555	T	G	T	G	-0.1396	0.017954	0.2637	FALSE	FALSE	FALSE	g41BLd	16282959	0.448455	0.0236862	outcome	TRUE	reported	textfile	2.85299e-07	2	16464227	3656	0.02714	TRUE	reported	igd	2	TRUE	0.00718478	26.4432	22.8834
	rs76112278	A	G	A	G	-0.4579	-0.0834585	0.0194	FALSE	FALSE	FALSE	g41BLd	15913446	0.379489	0.0949645	outcome	TRUE	reported	textfile	1.09099e-07	4	15915069	3656	0.08605	TRUE	reported	igd	2	TRUE	0.00768569	28.301	22.8834
	rs76608654	C	T	C	T	0.2489	-0.00720256	0.0494	FALSE	FALSE	FALSE	g41BLd	55416567	0.88929	0.0517417	outcome	TRUE	reported	textfile	4.56405e-06	16	55450479	3656	0.05423	TRUE	reported	igd	2	TRUE	0.00572887	21.0539	22.8834
	rs76660971	A	G	A	G	-0.1264	-0.0249641	0.2299	FALSE	FALSE	FALSE	g41BLd	18919417	0.467222	0.0343382	outcome	TRUE	reported	textfile	8.14798e-06	5	18919526	3656	0.02828	TRUE	reported	igd	2	TRUE	0.00543454	19.9663	22.8834
	rs7667070	C	T	C	T	-0.2956	0.0566585	0.0361	FALSE	FALSE	FALSE	g41BLd	38378212	0.336481	0.0589492	outcome	TRUE	reported	textfile	2.36298e-06	4	38379833	3656	0.06254	TRUE	reported	igd	2	TRUE	0.00607353	22.3283	22.8834
	rs78188887	G	A	G	A	1.533	0.0907131	0.0014	FALSE	FALSE	FALSE	g41BLd	154780227	0.226547	0.0750129	outcome	TRUE	reported	textfile	1.80198e-06	2	155636739	3656	0.3206	TRUE	reported	igd	2	TRUE	0.00621503	22.8518	22.8834
	rs78658073	A	G	A	G	1.665	0.204834	0.001	FALSE	FALSE	FALSE	g41BLd	498658	0.0144208	0.0837216	outcome	TRUE	reported	textfile	4.385e-06	5	498773	3656	0.362	TRUE	reported	igd	2	TRUE	0.00575307	21.1433	22.8834
	rs794185	C	T	C	T	-0.1116	0.0167341	0.3362	FALSE	FALSE	FALSE	g41BLd	4395674	0.483807	0.0238992	outcome	TRUE	reported	textfile	9.05899e-06	3	4437358	3656	0.02511	TRUE	reported	igd	2	TRUE	0.00537389	19.7423	22.8834
	rs80330977	A	G	A	G	-0.2576	-0.00441336	0.0814	FALSE	FALSE	FALSE	g41BLd	158849602	0.931804	0.051573	outcome	TRUE	reported	textfile	6.158e-09	5	158276610	3656	0.04422	TRUE	reported	igd	2	TRUE	0.00919677	33.9169	22.8834
GCST90001393	rs2301101	G	T	G	T	-0.187	-0.0400546	0.1097	FALSE	FALSE	FALSE	3JHKlg	84124589	0.404765	0.0480766	outcome	TRUE	reported	textfile	2.93501e-06	5	83420407	3657	0.03994	TRUE	reported	igd	2	TRUE	0.00595863	21.9094	22.2444
	rs329966	G	A	G	A	-0.1265	0.0139082	0.5425	FALSE	FALSE	FALSE	3JHKlg	52567364	0.578376	0.0250256	outcome	TRUE	reported	textfile	2.90402e-07	19	53070617	3657	0.02461	TRUE	reported	igd	2	TRUE	0.00717309	26.4071	22.2444
	rs34157595	C	T	C	T	0.1327	-0.0412746	0.3154	FALSE	FALSE	FALSE	3JHKlg	51123586	0.0934458	0.0246049	outcome	TRUE	reported	textfile	7.23303e-07	17	49200947	3657	0.02673	TRUE	reported	igd	2	TRUE	0.00669425	24.6324	22.2444
	rs4811007	G	A	G	A	0.1261	0.0487854	0.4837	FALSE	FALSE	FALSE	3JHKlg	50223067	0.0385469	0.0235794	outcome	TRUE	reported	textfile	3.12702e-07	20	48839604	3657	0.02461	TRUE	reported	igd	2	TRUE	0.00712812	26.2403	22.2444
	rs60521331	A	G	A	G	0.1107	0.00805878	0.5022	FALSE	FALSE	FALSE	3JHKlg	8736587	0.732039	0.0235351	outcome	TRUE	reported	textfile	7.24202e-06	17	8639905	3657	0.02463	TRUE	reported	igd	2	TRUE	0.0054935	20.1897	22.2444
	rs61912200	A	T	A	T	1.216	-0.00292313	0.0022	FALSE	TRUE	TRUE	3JHKlg	1527960	0.964713	0.0660741	outcome	TRUE	reported	textfile	4.81903e-06	12	1637126	3657	0.2655	TRUE	reported	igd	2	FALSE	0.00570334	20.9653	22.2444
	rs62488766	G	A	G	A	-0.3635	0.0607042	0.0283	FALSE	FALSE	FALSE	3JHKlg	12660786	0.430868	0.0770644	outcome	TRUE	reported	textfile	6.80205e-06	8	12518295	3657	0.08066	TRUE	reported	igd	2	TRUE	0.00552284	20.2981	22.2444
	rs6835759	G	A	G	A	0.1189	-0.00691048	0.4701	FALSE	FALSE	FALSE	3JHKlg	169407058	0.79132	0.026117	outcome	TRUE	reported	textfile	1.79498e-06	4	170328209	3657	0.02486	TRUE	reported	igd	2	TRUE	0.00621625	22.8625	22.2444
	rs6998850	G	A	G	A	0.1204	-0.0405496	0.3018	FALSE	FALSE	FALSE	3JHKlg	60935469	0.119807	0.0260671	outcome	TRUE	reported	textfile	7.45899e-06	8	61848028	3657	0.02683	TRUE	reported	igd	2	TRUE	0.00547648	20.1268	22.2444
	rs73909843	C	T	C	T	0.2092	0.0558171	0.0764	FALSE	FALSE	FALSE	3JHKlg	50938227	0.230288	0.0465291	outcome	TRUE	reported	textfile	7.39095e-06	20	49554764	3657	0.0466	TRUE	reported	igd	2	TRUE	0.00548075	20.1425	22.2444
	rs75766272	T	C	T	C	0.3861	-0.0296118	0.0201	FALSE	FALSE	FALSE	3JHKlg	7949925	0.521078	0.046147	outcome	TRUE	reported	textfile	7.14299e-06	1	8009985	3657	0.08587	TRUE	reported	igd	2	TRUE	0.00549791	20.2059	22.2444
	rs7595353	C	T	C	T	-0.1211	0.00364219	0.3054	FALSE	FALSE	FALSE	3JHKlg	228367334	0.897806	0.0283587	outcome	TRUE	reported	textfile	6.02005e-06	2	229232050	3657	0.02671	TRUE	reported	igd	2	TRUE	0.00558961	20.5448	22.2444
	rs78269238	T	C	T	C	-0.2771	-0.133993	0.0582	FALSE	FALSE	FALSE	3JHKlg	65207086	0.111524	0.0841991	outcome	TRUE	reported	textfile	2.34498e-07	14	65673804	3657	0.05349	TRUE	reported	igd	2	TRUE	0.00728497	26.8219	22.2444
	rs78958229	T	C	T	C	0.2934	-0.0942263	0.044	FALSE	FALSE	FALSE	3JHKlg	37991655	0.501281	0.140118	outcome	TRUE	reported	textfile	7.21705e-07	21	39363957	3657	0.0591	TRUE	reported	igd	2	TRUE	0.00669427	24.6325	22.2444
	rs9459562	C	G	C	G	0.1101	-0.00994279	0.4346	FALSE	TRUE	TRUE	3JHKlg	166088560	0.693637	0.0252404	outcome	TRUE	reported	textfile	9.1791e-06	6	166502048	3657	0.02478	TRUE	reported	igd	2	FALSE	0.00536919	19.7303	22.2444
	rs9865821	A	C	A	C	0.115	-0.0316401	0.6459	FALSE	FALSE	FALSE	3JHKlg	6972444	0.190109	0.0241481	outcome	TRUE	reported	textfile	7.16193e-06	3	7014131	3657	0.02558	TRUE	reported	igd	2	TRUE	0.00549637	20.2003	22.2444
GCST90001394	rs115150472	T	C	T	C	2.534	-0.0755266	0.0004	FALSE	FALSE	FALSE	N8BqPK	146759225	0.304257	0.073516	outcome	TRUE	reported	textfile	9.63008e-06	5	146138788	3656	0.5718	TRUE	reported	igd	2	TRUE	0.00534308	19.6285	22.3022
	rs115951641	T	A	T	A	0.2476	-0.0355597	0.049	FALSE	TRUE	TRUE	N8BqPK	52471917	0.270014	0.0322381	outcome	TRUE	reported	textfile	9.24996e-06	6	52336715	3656	0.05577	TRUE	reported	igd	2	FALSE	0.00536239	19.6998	22.3022
	rs116851238	T	C	T	C	-0.4319	-0.0986484	0.0176	FALSE	FALSE	FALSE	N8BqPK	33503086	0.52924	0.156793	outcome	TRUE	reported	textfile	1.64399e-06	10	33792014	3656	0.08996	TRUE	reported	igd	2	TRUE	0.00626516	23.0372	22.3022
	rs117518951	C	T	C	T	0.2458	-0.00684437	0.049	FALSE	FALSE	FALSE	N8BqPK	55415281	0.894857	0.0517883	outcome	TRUE	reported	textfile	6.92708e-06	16	55449193	3656	0.0546	TRUE	reported	igd	2	TRUE	0.00551279	20.2554	22.3022
	rs12197153	A	G	A	G	2.216	0.0341528	0.0007	FALSE	FALSE	FALSE	N8BqPK	100373584	0.414812	0.0418819	outcome	TRUE	reported	textfile	5.95895e-07	6	100821460	3656	0.4431	TRUE	reported	igd	2	TRUE	0.00679468	24.9976	22.3022
	rs12799241	A	G	A	G	0.13	0.0593951	0.2619	FALSE	FALSE	FALSE	N8BqPK	120110021	0.0495656	0.0302467	outcome	TRUE	reported	textfile	1.99301e-06	11	119980729	3656	0.0273	TRUE	reported	igd	2	TRUE	0.0061641	22.6633	22.3022
	rs12906621	A	G	A	G	0.1764	-0.0855528	0.1091	FALSE	FALSE	FALSE	N8BqPK	36885212	0.0424444	0.0421622	outcome	TRUE	reported	textfile	3.91102e-06	15	37177413	3656	0.03817	TRUE	reported	igd	2	TRUE	0.00580787	21.3459	22.3022
	rs12939566	T	A	T	A	-0.1486	-0.0304785	0.4148	FALSE	TRUE	TRUE	N8BqPK	39882137	0.195056	0.0235216	outcome	TRUE	reported	textfile	5.30603e-08	17	38038390	3656	0.02725	TRUE	reported	igd	2	FALSE	0.00806827	29.7212	22.3022
	rs139801247	C	T	C	T	0.3801	0.0419789	0.0208	FALSE	FALSE	FALSE	N8BqPK	135856008	0.494225	0.0614083	outcome	TRUE	reported	textfile	5.63002e-06	9	138747854	3656	0.0836	TRUE	reported	igd	2	TRUE	0.00562248	20.6607	22.3022
	rs141880653	T	C	T	C	1.849	0.0569384	0.001	FALSE	FALSE	FALSE	N8BqPK	167543732	0.72627	0.162639	outcome	TRUE	reported	textfile	3.49004e-06	5	166970737	3656	0.3979	TRUE	reported	igd	2	TRUE	0.00587168	21.5818	22.3022
	rs143176410	C	G	C	G	1.912	-0.320961	0.001	FALSE	TRUE	TRUE	N8BqPK	84271633	0.027867	0.145947	outcome	TRUE	reported	textfile	1.185e-06	16	84305239	3656	0.3929	TRUE	reported	igd	2	FALSE	0.00643578	23.6687	22.3022
	rs143397127	C	T	C	T	-0.4549	0.269617	0.0157	FALSE	FALSE	FALSE	N8BqPK	12807766	0.403168	0.322517	outcome	TRUE	reported	textfile	2.37602e-06	7	12847391	3656	0.09626	TRUE	reported	igd	2	TRUE	0.0060714	22.3204	22.3022
	rs147207149	G	A	G	A	0.6732	0.0181373	0.0075	FALSE	FALSE	FALSE	N8BqPK	129451060	0.846805	0.0938804	outcome	TRUE	reported	textfile	1.78398e-06	5	128786753	3656	0.1407	TRUE	reported	igd	2	TRUE	0.00622276	22.8803	22.3022
	rs150663332	T	C	T	C	-0.1942	0.0396887	0.084	FALSE	FALSE	FALSE	N8BqPK	2097003	0.340198	0.0416122	outcome	TRUE	reported	textfile	5.88098e-06	8	2044843	3656	0.0428	TRUE	reported	igd	2	TRUE	0.00559972	20.5766	22.3022
	rs1510970	A	G	A	G	-0.1966	-0.00417631	0.087	FALSE	FALSE	FALSE	N8BqPK	118881043	0.895133	0.0316838	outcome	TRUE	reported	textfile	3.57001e-06	5	118216738	3656	0.04234	TRUE	reported	igd	2	TRUE	0.00586281	21.549	22.3022
	rs17056318	C	T	C	T	-0.2225	-0.00417479	0.081	FALSE	FALSE	FALSE	N8BqPK	158858945	0.935471	0.0515637	outcome	TRUE	reported	textfile	5.37403e-07	5	158285953	3656	0.04431	TRUE	reported	igd	2	TRUE	0.0068496	25.2011	22.3022
	rs190448231	G	T	G	T	0.327	-0.018266	0.028	FALSE	FALSE	FALSE	N8BqPK	88239228	0.885472	0.126815	outcome	TRUE	reported	textfile	8.89406e-06	7	87868543	3656	0.07351	TRUE	reported	igd	2	TRUE	0.00538334	19.7772	22.3022
	rs2395904	G	T	G	T	-0.1253	0.000463352	0.2657	FALSE	FALSE	FALSE	N8BqPK	129605573	0.986168	0.026727	outcome	TRUE	reported	textfile	3.02503e-06	8	130617819	3656	0.0268	TRUE	reported	igd	2	TRUE	0.00594343	21.8472	22.3022
	rs283340	C	T	C	T	0.1175	-0.0470964	0.5621	FALSE	FALSE	FALSE	N8BqPK	69281301	0.0489125	0.0239146	outcome	TRUE	reported	textfile	1.128e-06	8	70193536	3656	0.02409	TRUE	reported	igd	2	TRUE	0.00646516	23.7774	22.3022
	rs34764986	C	T	C	T	-0.2175	-0.120795	0.0699	FALSE	FALSE	FALSE	N8BqPK	61351498	0.0877971	0.0707587	outcome	TRUE	reported	textfile	3.31497e-06	20	59926554	3656	0.04671	TRUE	reported	igd	2	TRUE	0.00589555	21.6701	22.3022
	rs4792571	T	G	T	G	0.1093	-0.000469862	0.4699	FALSE	FALSE	FALSE	N8BqPK	15027917	0.984121	0.0236081	outcome	TRUE	reported	textfile	4.41804e-06	17	14931234	3656	0.02377	TRUE	reported	igd	2	TRUE	0.00575005	21.1322	22.3022
	rs655580	A	G	A	G	0.1183	-0.0167036	0.4571	FALSE	FALSE	FALSE	N8BqPK	52535857	0.500865	0.0248148	outcome	TRUE	reported	textfile	7.70495e-07	19	53039110	3656	0.0239	TRUE	reported	igd	2	TRUE	0.00665682	24.487	22.3022
	rs72691696	T	C	T	C	1.476	-0.11417	0.0014	FALSE	FALSE	FALSE	N8BqPK	166629445	0.0654018	0.0619645	outcome	TRUE	reported	textfile	9.04899e-06	1	166598682	3656	0.332	TRUE	reported	igd	2	TRUE	0.00537711	19.7542	22.3022
	rs75474045	A	G	A	G	0.5528	-0.179957	0.0126	FALSE	FALSE	FALSE	N8BqPK	71854164	0.0298992	0.0828753	outcome	TRUE	reported	textfile	2.08502e-07	13	72428296	3656	0.1063	TRUE	reported	igd	2	TRUE	0.00734282	27.0291	22.3022
	rs7690529	G	A	G	A	0.5256	0.0157042	0.0115	FALSE	FALSE	FALSE	N8BqPK	90491241	0.933167	0.187265	outcome	TRUE	reported	textfile	7.71898e-06	4	91412392	3656	0.1173	TRUE	reported	igd	2	TRUE	0.00546173	20.0668	22.3022
	rs8076302	T	C	T	C	-0.1385	0.00727305	0.185	FALSE	FALSE	FALSE	N8BqPK	81291901	0.791537	0.0275166	outcome	TRUE	reported	textfile	6.00703e-06	17	79265701	3656	0.03056	TRUE	reported	igd	2	TRUE	0.00558668	20.5284	22.3022
GCST90001395	rs10111625	G	A	G	A	-0.1169	0.0446069	0.5384	FALSE	FALSE	FALSE	aWLgEm	78683169	0.0942801	0.026659	outcome	TRUE	reported	textfile	7.72094e-06	8	79595404	3657	0.02611	TRUE	reported	igd	2	TRUE	0.0054515	20.0345	22.4619
	rs10254361	T	G	T	G	0.1333	-0.0186199	0.2404	FALSE	FALSE	FALSE	aWLgEm	119924151	0.473532	0.0259785	outcome	TRUE	reported	textfile	4.40099e-06	7	119564205	3657	0.02899	TRUE	reported	igd	2	TRUE	0.00574825	21.1313	22.4619
	rs10444793	A	G	A	G	-0.4608	-0.211105	0.018	FALSE	FALSE	FALSE	aWLgEm	44225491	0.0248691	0.0940991	outcome	TRUE	reported	textfile	4.34901e-07	15	44517689	3657	0.09102	TRUE	reported	igd	2	TRUE	0.00695974	25.6161	22.4619
	rs11150426	C	G	C	G	-0.1169	-0.0111975	0.5386	FALSE	TRUE	TRUE	aWLgEm	81952978	0.633814	0.0235061	outcome	TRUE	reported	textfile	1.78098e-06	16	81986583	3657	0.02444	TRUE	reported	igd	2	FALSE	0.00621718	22.8659	22.4619
	rs113398446	C	A	C	A	0.1793	-0.0488662	0.1687	FALSE	FALSE	FALSE	aWLgEm	161450723	0.115781	0.0310709	outcome	TRUE	reported	textfile	3.91201e-08	6	161871755	3657	0.03256	TRUE	reported	igd	2	TRUE	0.00822395	30.3078	22.4619
	rs115802369	G	A	G	A	-0.4129	0.0234328	0.0175	FALSE	FALSE	FALSE	aWLgEm	5380657	0.926069	0.252531	outcome	TRUE	reported	textfile	7.76497e-06	6	5380890	3657	0.0922	TRUE	reported	igd	2	TRUE	0.00545416	20.0443	22.4619
	rs147135384	C	T	C	T	-2.756	0.0542625	0.0004	FALSE	FALSE	FALSE	aWLgEm	39903436	0.425104	0.0680323	outcome	TRUE	reported	textfile	8.78294e-06	15	40195637	3657	0.6192	TRUE	reported	igd	2	TRUE	0.00538797	19.7997	22.4619
	rs148952274	T	C	T	C	-2.911	0.0231133	0.0004	FALSE	FALSE	FALSE	aWLgEm	37982530	0.824885	0.104459	outcome	TRUE	reported	textfile	7.01003e-06	9	37982527	3657	0.6469	TRUE	reported	igd	2	TRUE	0.00550664	20.2382	22.4619
	rs1512044	A	G	A	G	0.202	0.0130901	0.1084	FALSE	FALSE	FALSE	aWLgEm	188906636	0.787022	0.0484498	outcome	TRUE	reported	textfile	2.07e-07	3	188624425	3657	0.03882	TRUE	reported	igd	2	TRUE	0.00734959	27.0616	22.4619
	rs181771926	A	G	A	G	-0.5276	0.0854997	0.0126	FALSE	FALSE	FALSE	aWLgEm	52260641	0.506403	0.128678	outcome	TRUE	reported	textfile	1.73002e-06	16	52294553	3657	0.1101	TRUE	reported	igd	2	TRUE	0.0062401	22.9508	22.4619
	rs1959342	T	A	T	A	0.112	0.0122565	0.3589	FALSE	TRUE	TRUE	aWLgEm	20205706	0.626705	0.0251999	outcome	TRUE	reported	textfile	9.81002e-06	14	20673865	3657	0.02529	TRUE	reported	igd	2	FALSE	0.00533446	19.602	22.4619
	rs2251199	G	A	G	A	0.1168	-0.00766828	0.628	FALSE	FALSE	FALSE	aWLgEm	14813772	0.752643	0.0243317	outcome	TRUE	reported	textfile	5.73799e-06	8	14671281	3657	0.02572	TRUE	reported	igd	2	TRUE	0.00560759	20.6113	22.4619
	rs329966	G	A	G	A	0.1246	0.0139082	0.5425	FALSE	FALSE	FALSE	aWLgEm	52567364	0.578376	0.0250256	outcome	TRUE	reported	textfile	3.62702e-07	19	53070617	3657	0.02445	TRUE	reported	igd	2	TRUE	0.00705148	25.9562	22.4619
	rs34843244	T	A	T	A	0.308	-0.0906231	0.033	FALSE	TRUE	TRUE	aWLgEm	90971551	0.360642	0.0991346	outcome	TRUE	reported	textfile	6.80597e-06	5	90267368	3657	0.06835	TRUE	reported	igd	2	FALSE	0.00552198	20.2949	22.4619
	rs35050775	T	G	T	G	0.3463	-0.24243	0.0268	FALSE	FALSE	FALSE	aWLgEm	8023233	0.0403757	0.118265	outcome	TRUE	reported	textfile	7.53894e-06	20	8003880	3657	0.07724	TRUE	reported	igd	2	TRUE	0.00546657	20.0901	22.4619
	rs62502412	T	A	T	A	0.1209	-0.00308208	0.2759	FALSE	TRUE	TRUE	aWLgEm	28407958	0.906302	0.026185	outcome	TRUE	reported	textfile	8.58401e-06	8	28265475	3657	0.02712	TRUE	reported	igd	2	FALSE	0.00540499	19.8626	22.4619
	rs7012048	C	T	C	T	0.1407	0.00868428	0.1874	FALSE	FALSE	FALSE	aWLgEm	29774323	0.790396	0.0326729	outcome	TRUE	reported	textfile	6.25403e-06	8	29631839	3657	0.0311	TRUE	reported	igd	2	TRUE	0.00556568	20.4564	22.4619
	rs73909843	C	T	C	T	-0.2138	0.0558171	0.0764	FALSE	FALSE	FALSE	aWLgEm	50938227	0.230288	0.0465291	outcome	TRUE	reported	textfile	4.00904e-06	20	49554764	3657	0.04629	TRUE	reported	igd	2	TRUE	0.00579949	21.3208	22.4619
	rs76376526	T	C	T	C	0.4948	-0.316567	0.0133	FALSE	FALSE	FALSE	aWLgEm	108487511	0.369581	0.352816	outcome	TRUE	reported	textfile	7.20593e-06	4	109408667	3657	0.1101	TRUE	reported	igd	2	TRUE	0.00549247	20.1859	22.4619
	rs77762131	C	G	C	G	0.3388	0.137884	0.045	FALSE	TRUE	TRUE	aWLgEm	95739501	0.3189	0.138337	outcome	TRUE	reported	textfile	4.101e-09	14	96205838	3657	0.05748	TRUE	reported	igd	2	FALSE	0.0094107	34.7229	22.4619
	rs78009119	G	T	G	T	-0.4914	-0.32814	0.0137	FALSE	FALSE	FALSE	aWLgEm	137085809	0.198759	0.255343	outcome	TRUE	reported	textfile	3.88401e-06	5	136421498	3657	0.1063	TRUE	reported	igd	2	TRUE	0.00580963	21.3583	22.4619
	rs79870102	G	A	G	A	0.9733	-0.0342265	0.0033	FALSE	FALSE	FALSE	aWLgEm	65947729	0.709883	0.0920038	outcome	TRUE	reported	textfile	6.83502e-06	12	66341509	3657	0.216	TRUE	reported	igd	2	TRUE	0.00552149	20.2931	22.4619
	rs80032720	A	G	A	G	0.2539	0.49241	0.0734	FALSE	FALSE	FALSE	aWLgEm	32417156	0.016474	0.205321	outcome	TRUE	reported	textfile	3.08901e-06	6	32384933	3657	0.05434	TRUE	reported	igd	2	TRUE	0.00593439	21.8197	22.4619
GCST90001396	rs10444793	A	G	A	G	-0.4107	-0.211105	0.0181	FALSE	FALSE	FALSE	vNWFbw	44225491	0.0248691	0.0940991	outcome	TRUE	reported	textfile	8.83792e-06	15	44517689	3656	0.09229	TRUE	reported	igd	2	TRUE	0.00538751	19.7926	21.8376
	rs10493766	G	A	G	A	-0.1336	0.00096895	0.233	FALSE	FALSE	FALSE	vNWFbw	85479977	0.969666	0.0254807	outcome	TRUE	reported	textfile	5.433e-06	1	85945660	3656	0.02933	TRUE	reported	igd	2	TRUE	0.00564319	20.7372	21.8376
	rs10866982	A	G	A	G	-0.1114	0.016865	0.4751	FALSE	FALSE	FALSE	vNWFbw	5269878	0.475986	0.0236611	outcome	TRUE	reported	textfile	6.49307e-06	8	5127400	3656	0.02467	TRUE	reported	igd	2	TRUE	0.00554639	20.3795	21.8376
	rs1158784	T	A	T	A	0.174	0.046672	0.1554	FALSE	TRUE	TRUE	vNWFbw	32790984	0.064031	0.0252013	outcome	TRUE	reported	textfile	4.88405e-06	6	32758761	3656	0.03801	TRUE	reported	igd	2	FALSE	0.00569921	20.9443	21.8376
	rs12216018	T	C	T	C	-0.1686	0.00714764	0.1415	FALSE	FALSE	FALSE	vNWFbw	130193445	0.79838	0.0279812	outcome	TRUE	reported	textfile	2.988e-06	6	130514590	3656	0.03603	TRUE	reported	igd	2	TRUE	0.0059537	21.8851	21.8376
	rs12763172	C	T	C	T	0.1258	-0.0362088	0.7213	FALSE	FALSE	FALSE	vNWFbw	83687763	0.123533	0.0235105	outcome	TRUE	reported	textfile	6.38499e-06	10	85447519	3656	0.02784	TRUE	reported	igd	2	TRUE	0.0055539	20.4073	21.8376
	rs12874404	G	A	G	A	0.1363	-0.0269776	0.3256	FALSE	FALSE	FALSE	vNWFbw	108341146	0.67766	0.0649035	outcome	TRUE	reported	textfile	3.41602e-07	13	108993494	3656	0.02669	TRUE	reported	igd	2	TRUE	0.00708274	26.065	21.8376
	rs144625305	T	C	T	C	0.6074	-0.111705	0.0086	FALSE	FALSE	FALSE	vNWFbw	7832045	0.268912	0.101038	outcome	TRUE	reported	textfile	8.70001e-06	7	7871676	3656	0.1364	TRUE	reported	igd	2	TRUE	0.00539468	19.8191	21.8376
	rs146687492	T	G	T	G	-0.3372	0.00558219	0.0291	FALSE	FALSE	FALSE	vNWFbw	125749799	0.917967	0.0541985	outcome	TRUE	reported	textfile	4.76903e-06	11	125619694	3656	0.07361	TRUE	reported	igd	2	TRUE	0.00570702	20.9732	21.8376
	rs149701635	G	C	G	C	-0.3526	-0.143598	0.0263	FALSE	TRUE	TRUE	vNWFbw	44699591	0.283034	0.133762	outcome	TRUE	reported	textfile	5.84804e-06	3	44741083	3656	0.07768	TRUE	reported	igd	2	FALSE	0.00560402	20.5925	21.8376
	rs1529727	G	T	G	T	0.1176	0.059926	0.5581	FALSE	FALSE	FALSE	vNWFbw	11053391	0.0112197	0.0236322	outcome	TRUE	reported	textfile	3.20701e-06	19	11164067	3656	0.02521	TRUE	reported	igd	2	TRUE	0.00591678	21.7486	21.8376
	rs62235484	A	G	A	G	0.4628	0.0383474	0.0175	FALSE	FALSE	FALSE	vNWFbw	39711123	0.452232	0.0510143	outcome	TRUE	reported	textfile	8.58005e-07	21	41083050	3656	0.09388	TRUE	reported	igd	2	TRUE	0.00660324	24.2886	21.8376
	rs71615254	C	A	C	A	-0.278	-0.00417705	0.0406	FALSE	FALSE	FALSE	vNWFbw	177737259	0.923987	0.0437788	outcome	TRUE	reported	textfile	8.085e-06	4	178658413	3656	0.0622	TRUE	reported	igd	2	TRUE	0.00543421	19.9651	21.8376
	rs77762131	C	G	C	G	0.3229	0.137884	0.045	FALSE	TRUE	TRUE	vNWFbw	95739501	0.3189	0.138337	outcome	TRUE	reported	textfile	2.85299e-08	14	96205838	3656	0.05806	TRUE	reported	igd	2	FALSE	0.00838913	30.9132	21.8376
	rs7809268	C	T	C	T	-0.2247	0.00108068	0.0687	FALSE	FALSE	FALSE	vNWFbw	96673295	0.969718	0.0284677	outcome	TRUE	reported	textfile	5.07201e-06	7	96302607	3656	0.04918	TRUE	reported	igd	2	TRUE	0.00567741	20.8637	21.8376
	rs7909504	A	G	A	G	-0.165	-0.00298239	0.1358	FALSE	FALSE	FALSE	vNWFbw	31885682	0.91477	0.0278666	outcome	TRUE	reported	textfile	8.79103e-06	10	32174610	3656	0.03707	TRUE	reported	igd	2	TRUE	0.00538976	19.8009	21.8376
	rs79207264	A	G	A	G	0.1854	0.0229815	0.1184	FALSE	FALSE	FALSE	vNWFbw	96687564	0.685215	0.0566945	outcome	TRUE	reported	textfile	2.73602e-06	3	96406408	3656	0.03946	TRUE	reported	igd	2	TRUE	0.00600184	22.0632	21.8376
GCST90001397	rs11519226	T	A	T	A	0.1229	-0.00676558	0.299	FALSE	TRUE	TRUE	wcmBxV	20169515	0.777315	0.0239218	outcome	TRUE	reported	textfile	6.23706e-06	12	20322449	3657	0.02717	TRUE	reported	igd	2	FALSE	0.00556386	20.4497	22.0597
	rs116525939	C	T	C	T	0.9467	0.206126	0.0036	FALSE	FALSE	FALSE	wcmBxV	98276220	0.250234	0.179274	outcome	TRUE	reported	textfile	5.22998e-06	5	97611924	3657	0.2075	TRUE	reported	igd	2	TRUE	0.00565977	20.8042	22.0597
	rs117004076	G	A	G	A	0.4523	-0.0457437	0.0146	FALSE	FALSE	FALSE	wcmBxV	97235889	0.491245	0.0664561	outcome	TRUE	reported	textfile	9.52708e-06	14	97702226	3657	0.102	TRUE	reported	igd	2	TRUE	0.00534809	19.6524	22.0597
	rs11779181	T	C	T	C	-0.1402	0.0779367	0.4003	FALSE	FALSE	FALSE	wcmBxV	9205517	0.00185362	0.025038	outcome	TRUE	reported	textfile	8.41008e-06	8	9063027	3657	0.03143	TRUE	reported	igd	2	TRUE	0.0054116	19.887	22.0597
	rs12380223	A	T	A	T	-0.5815	-0.0538289	0.0096	FALSE	TRUE	TRUE	wcmBxV	7639660	0.511458	0.0819851	outcome	TRUE	reported	textfile	5.76196e-06	9	7639660	3657	0.128	TRUE	reported	igd	2	FALSE	0.00561191	20.6273	22.0597
	rs12539793	T	C	T	C	-0.5404	0.0057851	0.0115	FALSE	FALSE	FALSE	wcmBxV	25932240	0.898113	0.0451799	outcome	TRUE	reported	textfile	2.47002e-06	7	25971860	3657	0.1145	TRUE	reported	igd	2	TRUE	0.00605421	22.2629	22.0597
	rs138380722	A	G	A	G	-1.906	-0.0526899	0.0007	FALSE	FALSE	FALSE	wcmBxV	58215069	0.517554	0.0814221	outcome	TRUE	reported	textfile	4.94197e-06	20	56790125	3657	0.4167	TRUE	reported	igd	2	TRUE	0.00568848	20.9103	22.0597
	rs143553941	C	G	C	G	0.5187	0.0805348	0.013	FALSE	TRUE	TRUE	wcmBxV	108974343	0.418795	0.0996084	outcome	TRUE	reported	textfile	2.093e-06	12	109368119	3657	0.1092	TRUE	reported	igd	2	FALSE	0.00613184	22.5502	22.0597
	rs143666202	A	G	A	G	0.2759	0.0122558	0.0503	FALSE	FALSE	FALSE	wcmBxV	77112884	0.728613	0.0353222	outcome	TRUE	reported	textfile	1.957e-06	14	77579227	3657	0.0579	TRUE	reported	igd	2	TRUE	0.00617068	22.6939	22.0597
	rs146430312	T	G	T	G	1.017	-0.0290099	0.0027	FALSE	FALSE	FALSE	wcmBxV	235896914	0.5266	0.0458144	outcome	TRUE	reported	textfile	4.87203e-06	1	236060214	3657	0.2222	TRUE	reported	igd	2	TRUE	0.00569571	20.9371	22.0597
	rs146720368	T	C	T	C	0.852	0.0497853	0.0042	FALSE	FALSE	FALSE	wcmBxV	31607477	0.3152	0.0495686	outcome	TRUE	reported	textfile	9.65895e-06	22	32003463	3657	0.1923	TRUE	reported	igd	2	TRUE	0.00533913	19.6193	22.0597
	rs150839591	G	T	G	T	0.2459	0.00729548	0.0552	FALSE	FALSE	FALSE	wcmBxV	410248	0.963083	0.157622	outcome	TRUE	reported	textfile	5.33998e-06	17	260039	3657	0.05396	TRUE	reported	igd	2	TRUE	0.00564663	20.7556	22.0597
	rs1596383	A	G	A	G	0.1208	0.0192289	0.6259	FALSE	FALSE	FALSE	wcmBxV	7993105	0.427059	0.0242106	outcome	TRUE	reported	textfile	3.06302e-06	18	7993103	3657	0.02585	TRUE	reported	igd	2	TRUE	0.00593611	21.8261	22.0597
	rs1679013	T	C	T	C	-0.1252	0.0298665	0.5945	FALSE	FALSE	FALSE	wcmBxV	22206988	0.211672	0.0239127	outcome	TRUE	reported	textfile	9.97103e-07	9	22206987	3657	0.02555	TRUE	reported	igd	2	TRUE	0.00652318	23.9988	22.0597
	rs17006489	G	A	G	A	-0.1728	0.0446039	0.1354	FALSE	FALSE	FALSE	wcmBxV	28081763	0.20776	0.0354069	outcome	TRUE	reported	textfile	4.976e-06	2	28304630	3657	0.03779	TRUE	reported	igd	2	TRUE	0.00568503	20.8976	22.0597
	rs183471524	G	A	G	A	-0.1978	-0.111075	0.0905	FALSE	FALSE	FALSE	wcmBxV	27107023	0.0687337	0.0610248	outcome	TRUE	reported	textfile	7.52905e-06	4	27108645	3657	0.04411	TRUE	reported	igd	2	TRUE	0.00546855	20.0974	22.0597
	rs1883832	C	T	C	T	-0.1236	0.0691545	0.6318	FALSE	FALSE	FALSE	wcmBxV	46118343	0.00852354	0.0262885	outcome	TRUE	reported	textfile	4.23701e-06	20	44746982	3657	0.02682	TRUE	reported	igd	2	TRUE	0.00577404	21.2267	22.0597
	rs1930922	G	A	G	A	-0.137	0.0492473	0.2419	FALSE	FALSE	FALSE	wcmBxV	90534804	0.0632179	0.0265105	outcome	TRUE	reported	textfile	3.54797e-06	9	93297086	3657	0.0295	TRUE	reported	igd	2	TRUE	0.00586298	21.5556	22.0597
	rs2793491	T	C	T	C	-0.1335	0.0210875	0.2052	FALSE	FALSE	FALSE	wcmBxV	24251913	0.435411	0.0270364	outcome	TRUE	reported	textfile	8.71806e-06	13	24826051	3657	0.02997	TRUE	reported	igd	2	TRUE	0.00539652	19.8313	22.0597
	rs45608038	G	A	G	A	0.294	-0.0687024	0.0421	FALSE	FALSE	FALSE	wcmBxV	73451886	0.26876	0.0621222	outcome	TRUE	reported	textfile	2.80698e-06	2	73679013	3657	0.06266	TRUE	reported	igd	2	TRUE	0.00598387	22.0027	22.0597
	rs4710879	T	C	T	C	-0.1204	0.011772	0.5621	FALSE	FALSE	FALSE	wcmBxV	170110803	0.625217	0.0240997	outcome	TRUE	reported	textfile	2.03301e-06	6	170426027	3657	0.0253	TRUE	reported	igd	2	TRUE	0.00615468	22.6347	22.0597
	rs72844588	A	G	A	G	0.2054	-0.0432547	0.0913	FALSE	FALSE	FALSE	wcmBxV	137662584	0.18981	0.0329901	outcome	TRUE	reported	textfile	2.31398e-06	2	138420154	3657	0.04341	TRUE	reported	igd	2	TRUE	0.00608479	22.3761	22.0597
	rs73032183	C	T	C	T	0.1675	-0.0595813	0.1509	FALSE	FALSE	FALSE	wcmBxV	169056735	0.195911	0.0460696	outcome	TRUE	reported	textfile	1.852e-06	6	169456830	3657	0.03506	TRUE	reported	igd	2	TRUE	0.00620267	22.8123	22.0597
	rs73041424	G	A	G	A	-0.2606	-0.0631224	0.0488	FALSE	FALSE	FALSE	wcmBxV	16372762	0.403702	0.0755932	outcome	TRUE	reported	textfile	8.18502e-06	3	16414269	3657	0.05834	TRUE	reported	igd	2	TRUE	0.0054266	19.9424	22.0597
	rs73192651	T	C	T	C	0.5551	0.0700385	0.02	FALSE	FALSE	FALSE	wcmBxV	49638749	0.446182	0.0919388	outcome	TRUE	reported	textfile	7.31493e-10	13	50212885	3657	0.08989	TRUE	reported	igd	2	TRUE	0.0103202	38.1138	22.0597
	rs7322292	T	C	T	C	-0.1256	-0.00438346	0.3275	FALSE	FALSE	FALSE	wcmBxV	50796763	0.853513	0.0237408	outcome	TRUE	reported	textfile	2.61403e-06	13	51370899	3657	0.02669	TRUE	reported	igd	2	TRUE	0.00601915	22.1332	22.0597
	rs73518104	A	G	A	G	0.2174	0.0362483	0.0708	FALSE	FALSE	FALSE	wcmBxV	69603446	0.678294	0.0873888	outcome	TRUE	reported	textfile	7.48204e-06	13	70177578	3657	0.04847	TRUE	reported	igd	2	TRUE	0.00547099	20.1065	22.0597
	rs7412746	T	C	T	C	-0.1152	0.031981	0.5153	FALSE	FALSE	FALSE	wcmBxV	150887995	0.177187	0.023699	outcome	TRUE	reported	textfile	7.80998e-06	1	150860471	3657	0.02573	TRUE	reported	igd	2	TRUE	0.00545163	20.0349	22.0597
	rs75766272	T	C	T	C	-0.4409	-0.0296118	0.0201	FALSE	FALSE	FALSE	wcmBxV	7949925	0.521078	0.046147	outcome	TRUE	reported	textfile	4.15002e-07	1	8009985	3657	0.08695	TRUE	reported	igd	2	TRUE	0.00698189	25.6982	22.0597
	rs77201712	C	T	C	T	0.2907	0.0335198	0.0392	FALSE	FALSE	FALSE	wcmBxV	156455310	0.449844	0.0443574	outcome	TRUE	reported	textfile	4.38995e-06	2	157311822	3657	0.06322	TRUE	reported	igd	2	TRUE	0.00574847	21.1321	22.0597
	rs77762131	C	G	C	G	0.3067	0.137884	0.045	FALSE	TRUE	TRUE	wcmBxV	95739501	0.3189	0.138337	outcome	TRUE	reported	textfile	1.457e-07	14	96205838	3657	0.05822	TRUE	reported	igd	2	FALSE	0.00753139	27.7361	22.0597
	rs895377	A	G	A	G	-0.1186	0.0153231	0.3683	FALSE	FALSE	FALSE	wcmBxV	58754703	0.526538	0.0241956	outcome	TRUE	reported	textfile	5.77604e-06	5	58050530	3657	0.02612	TRUE	reported	igd	2	TRUE	0.00560604	20.6056	22.0597
GCST90001398	rs112839090	A	G	A	G	-0.1468	-0.0461178	0.1972	FALSE	FALSE	FALSE	5FEmur	119290178	0.224735	0.0379873	outcome	TRUE	reported	textfile	2.18902e-06	12	119727983	3656	0.03096	TRUE	reported	igd	2	TRUE	0.00611197	22.4705	23.163
	rs11657118	C	T	C	T	-0.1112	-0.00956352	0.475	FALSE	FALSE	FALSE	5FEmur	2810824	0.690359	0.0240068	outcome	TRUE	reported	textfile	4.20998e-06	17	2714118	3656	0.02412	TRUE	reported	igd	2	TRUE	0.00578005	21.2431	23.163
	rs11737576	T	C	T	C	-0.2347	-0.0605456	0.0584	FALSE	FALSE	FALSE	5FEmur	55057034	0.0561914	0.0317068	outcome	TRUE	reported	textfile	7.42506e-06	4	55923201	3656	0.05231	TRUE	reported	igd	2	TRUE	0.00547603	20.1196	23.163
	rs11794578	G	T	G	T	0.1114	-0.00443593	0.4521	FALSE	FALSE	FALSE	5FEmur	808529	0.85181	0.0237457	outcome	TRUE	reported	textfile	5.41701e-06	9	808529	3656	0.02446	TRUE	reported	igd	2	TRUE	0.0056415	20.731	23.163
	rs118092259	G	T	G	T	-0.2912	0.201697	0.0414	FALSE	FALSE	FALSE	5FEmur	88420490	0.140211	0.136743	outcome	TRUE	reported	textfile	4.00101e-06	8	89432719	3656	0.06306	TRUE	reported	igd	2	TRUE	0.00579886	21.3126	23.163
	rs12874404	G	A	G	A	0.1523	-0.0269776	0.3256	FALSE	FALSE	FALSE	5FEmur	108341146	0.67766	0.0649035	outcome	TRUE	reported	textfile	8.62303e-09	13	108993494	3656	0.02639	TRUE	reported	igd	2	TRUE	0.00902768	33.2877	23.163
	rs143666202	A	G	A	G	0.268	0.0122558	0.0502	FALSE	FALSE	FALSE	5FEmur	77112884	0.728613	0.0353222	outcome	TRUE	reported	textfile	2.711e-06	14	77579227	3656	0.05703	TRUE	reported	igd	2	TRUE	0.00600401	22.0712	23.163
	rs144625305	T	C	T	C	0.5999	-0.111705	0.0086	FALSE	FALSE	FALSE	5FEmur	7832045	0.268912	0.101038	outcome	TRUE	reported	textfile	8.69901e-06	7	7871676	3656	0.1347	TRUE	reported	igd	2	TRUE	0.00539593	19.8237	23.163
	rs145371905	T	G	T	G	0.4126	0.0181739	0.0194	FALSE	FALSE	FALSE	5FEmur	69751640	0.918231	0.177027	outcome	TRUE	reported	textfile	3.42997e-06	13	70325772	3656	0.08871	TRUE	reported	igd	2	TRUE	0.00588227	21.621	23.163
	rs2436878	G	A	G	A	0.2056	-0.0156063	0.077	FALSE	FALSE	FALSE	5FEmur	102754943	0.625035	0.0319324	outcome	TRUE	reported	textfile	6.40693e-06	8	103767171	3656	0.04549	TRUE	reported	igd	2	TRUE	0.00555633	20.4163	23.163
	rs4076316	A	T	A	T	-0.1331	0.0112908	0.3005	FALSE	TRUE	TRUE	5FEmur	167447406	0.642084	0.0242923	outcome	TRUE	reported	textfile	9.72904e-07	6	167859623	3656	0.02714	TRUE	reported	igd	2	FALSE	0.00653556	24.038	23.163
	rs557577736	G	A	G	A	1.924	0.174798	0.001	FALSE	FALSE	FALSE	5FEmur	45649957	0.244948	0.150337	outcome	TRUE	reported	textfile	6.08793e-07	13	46224092	3656	0.3849	TRUE	reported	igd	2	TRUE	0.00678813	24.9733	23.163
	rs6032660	A	G	A	G	-0.1345	0.071631	0.6359	FALSE	FALSE	FALSE	5FEmur	46101606	0.006187	0.0261647	outcome	TRUE	reported	textfile	3.65797e-07	20	44730245	3656	0.02641	TRUE	reported	igd	2	TRUE	0.0070442	25.9221	23.163
	rs7254039	A	G	A	G	-0.2602	0.029214	0.0435	FALSE	FALSE	FALSE	5FEmur	14882542	0.571787	0.0516677	outcome	TRUE	reported	textfile	7.42506e-06	19	14993354	3656	0.05799	TRUE	reported	igd	2	TRUE	0.00547668	20.122	23.163
	rs73192651	T	C	T	C	0.4968	0.0700385	0.02	FALSE	FALSE	FALSE	5FEmur	49638749	0.446182	0.0919388	outcome	TRUE	reported	textfile	2.09402e-08	13	50212885	3656	0.08845	TRUE	reported	igd	2	TRUE	0.00855519	31.5304	23.163
	rs75766272	T	C	T	C	-0.3814	-0.0296118	0.0201	FALSE	FALSE	FALSE	5FEmur	7949925	0.521078	0.046147	outcome	TRUE	reported	textfile	8.57808e-06	1	8009985	3656	0.08558	TRUE	reported	igd	2	TRUE	0.00540328	19.8509	23.163
	rs77762131	C	G	C	G	0.3067	0.137884	0.045	FALSE	TRUE	TRUE	5FEmur	95739501	0.3189	0.138337	outcome	TRUE	reported	textfile	8.86605e-08	14	96205838	3656	0.05723	TRUE	reported	igd	2	FALSE	0.00779427	28.704	23.163
	rs79831025	G	C	G	C	0.3026	-0.114331	0.0334	FALSE	TRUE	TRUE	5FEmur	41013473	0.102679	0.0700557	outcome	TRUE	reported	textfile	8.29392e-06	6	40981212	3656	0.06778	TRUE	reported	igd	2	FALSE	0.0054221	19.9204	23.163
	rs8014978	C	T	C	T	-0.123	-0.0413941	0.5737	FALSE	FALSE	FALSE	5FEmur	94470627	0.0864789	0.0241467	outcome	TRUE	reported	textfile	6.71104e-07	14	94936964	3656	0.02471	TRUE	reported	igd	2	TRUE	0.00673171	24.7644	23.163
	rs880311	T	C	T	C	-0.1813	0.00581325	0.1034	FALSE	FALSE	FALSE	5FEmur	8869647	0.900203	0.0463559	outcome	TRUE	reported	textfile	6.62995e-06	16	8963504	3656	0.04019	TRUE	reported	igd	2	TRUE	0.00553532	20.3386	23.163
GCST90001399	rs11086984	T	C	T	C	-0.1811	-0.00914334	0.1514	FALSE	FALSE	FALSE	d13Rq6	45882988	0.79961	0.0360184	outcome	TRUE	reported	textfile	2.36799e-07	20	44511627	3657	0.03498	TRUE	reported	igd	2	TRUE	0.00727614	26.7892	37.835
	rs116473015	T	C	T	C	0.3455	-0.00460505	0.029	FALSE	FALSE	FALSE	d13Rq6	147101442	0.966247	0.108827	outcome	TRUE	reported	textfile	3.14101e-06	2	147859010	3657	0.07401	TRUE	reported	igd	2	TRUE	0.00592393	21.781	37.835
	rs11658240	G	A	G	A	-0.1678	-0.00911469	0.1362	FALSE	FALSE	FALSE	d13Rq6	82526263	0.806241	0.0371607	outcome	TRUE	reported	textfile	2.76599e-06	17	80484139	3657	0.03574	TRUE	reported	igd	2	TRUE	0.00599156	22.0312	37.835
	rs2250246	G	A	G	A	0.1466	0.0249801	0.5339	FALSE	FALSE	FALSE	d13Rq6	6443850	0.303163	0.0242602	outcome	TRUE	reported	textfile	2.12501e-09	12	6553016	3657	0.02442	TRUE	reported	igd	2	TRUE	0.00975872	36.0196	37.835
	rs35574803	C	T	C	T	-0.3526	-0.0818995	0.0562	FALSE	FALSE	FALSE	d13Rq6	32491754	0.482266	0.116556	outcome	TRUE	reported	textfile	5.92243e-11	3	32533246	3657	0.05371	TRUE	reported	igd	2	TRUE	0.0116477	43.0742	37.835
	rs35661323	T	C	T	C	0.1158	0.00317633	0.5505	FALSE	FALSE	FALSE	d13Rq6	44245184	0.894409	0.0239313	outcome	TRUE	reported	textfile	4.73097e-06	7	44284783	3657	0.02527	TRUE	reported	igd	2	TRUE	0.00570946	20.9879	37.835
	rs4810485	G	T	G	T	0.3898	0.0708584	0.6314	FALSE	FALSE	FALSE	d13Rq6	46119308	0.00696819	0.0262597	outcome	TRUE	reported	textfile	7.1978e-50	20	44747947	3657	0.02585	TRUE	reported	igd	2	TRUE	0.0585383	227.261	37.835
	rs6073079	A	G	A	G	0.1776	0.0879935	0.12	FALSE	FALSE	FALSE	d13Rq6	43395897	0.0712755	0.0487845	outcome	TRUE	reported	textfile	2.21299e-06	20	42024537	3657	0.03746	TRUE	reported	igd	2	TRUE	0.00610892	22.4653	37.835
	rs62223906	T	C	T	C	0.2217	0.0313412	0.0649	FALSE	FALSE	FALSE	d13Rq6	37326723	0.484138	0.0447947	outcome	TRUE	reported	textfile	8.39093e-06	21	38699025	3657	0.0497	TRUE	reported	igd	2	TRUE	0.00541174	19.8875	37.835
	rs645554	A	G	A	G	-0.1226	-0.0182951	0.2811	FALSE	FALSE	FALSE	d13Rq6	14279136	0.485198	0.026212	outcome	TRUE	reported	textfile	5.52205e-06	19	14389948	3657	0.02695	TRUE	reported	igd	2	TRUE	0.00562714	20.6836	37.835
	rs7209088	G	C	G	C	-0.12	0.00107699	0.2786	FALSE	TRUE	TRUE	d13Rq6	8126847	0.969412	0.0280866	outcome	TRUE	reported	textfile	9.40503e-06	17	8030165	3657	0.02705	TRUE	reported	igd	2	FALSE	0.00535269	19.6694	37.835
	rs7224129	A	G	A	G	-0.1297	0.0469891	0.4751	FALSE	FALSE	FALSE	d13Rq6	39919173	0.0473784	0.0236971	outcome	TRUE	reported	textfile	2.61e-06	17	38075426	3657	0.02756	TRUE	reported	igd	2	TRUE	0.00601969	22.1352	37.835
	rs72897237	C	T	C	T	0.4671	0.194995	0.0161	FALSE	FALSE	FALSE	d13Rq6	39973293	0.095971	0.117135	outcome	TRUE	reported	textfile	1.69699e-06	18	37553257	3657	0.09743	TRUE	reported	igd	2	TRUE	0.0062458	22.9719	37.835
	rs76625665	T	G	T	G	-0.6497	-0.0590958	0.0068	FALSE	FALSE	FALSE	d13Rq6	232913993	0.272386	0.0538417	outcome	TRUE	reported	textfile	6.61302e-06	1	233049739	3657	0.144	TRUE	reported	igd	2	TRUE	0.0055356	20.3453	37.835
	rs79430021	A	G	A	G	0.7602	0.155231	0.006	FALSE	FALSE	FALSE	d13Rq6	25035893	0.715601	0.426055	outcome	TRUE	reported	textfile	3.80697e-06	4	25037515	3657	0.1642	TRUE	reported	igd	2	TRUE	0.00582702	21.4226	37.835
GCST90001400	rs11638959	A	G	A	G	0.1525	0.063918	0.1557	FALSE	FALSE	FALSE	fVEXr4	24926003	0.0995222	0.0388045	outcome	TRUE	reported	textfile	3.46801e-06	15	25171150	3657	0.03281	TRUE	reported	igd	2	TRUE	0.00587279	21.5918	23.3755
	rs11653761	T	G	T	G	-0.1212	-0.00132543	0.5919	FALSE	FALSE	FALSE	fVEXr4	2813241	0.955996	0.0240208	outcome	TRUE	reported	textfile	7.76998e-07	17	2716535	3657	0.02449	TRUE	reported	igd	2	TRUE	0.00665279	24.4788	23.3755
	rs116906133	G	A	G	A	-0.9845	-0.0454807	0.0037	FALSE	FALSE	FALSE	fVEXr4	99371651	0.318275	0.0455715	outcome	TRUE	reported	textfile	8.4349e-06	13	100023905	3657	0.2207	TRUE	reported	igd	2	TRUE	0.00541184	19.8879	23.3755
	rs12197153	A	G	A	G	2.08	0.0341528	0.0007	FALSE	FALSE	FALSE	fVEXr4	100373584	0.414812	0.0418819	outcome	TRUE	reported	textfile	3.74498e-06	6	100821460	3657	0.4491	TRUE	reported	igd	2	TRUE	0.00583144	21.4389	23.3755
	rs143176410	C	G	C	G	1.831	-0.320961	0.001	FALSE	TRUE	TRUE	fVEXr4	84271633	0.027867	0.145947	outcome	TRUE	reported	textfile	5.75705e-06	16	84305239	3657	0.4032	TRUE	reported	igd	2	FALSE	0.00560749	20.611	23.3755
	rs150663332	T	C	T	C	-0.2314	0.0396887	0.0839	FALSE	FALSE	FALSE	fVEXr4	2097003	0.340198	0.0416122	outcome	TRUE	reported	textfile	1.28399e-07	8	2044843	3657	0.04374	TRUE	reported	igd	2	TRUE	0.00759509	27.9725	23.3755
	rs189761842	T	C	T	C	0.8269	-0.0333735	0.0055	FALSE	FALSE	FALSE	fVEXr4	123725829	0.666627	0.0774721	outcome	TRUE	reported	textfile	1.15199e-06	10	125485345	3657	0.1697	TRUE	reported	igd	2	TRUE	0.0064507	23.7304	23.3755
	rs2390504	A	G	A	G	-0.2583	-0.0188853	0.0485	FALSE	FALSE	FALSE	fVEXr4	21282052	0.500587	0.0280377	outcome	TRUE	reported	textfile	6.222e-06	7	21321670	3657	0.05708	TRUE	reported	igd	2	TRUE	0.00556841	20.4665	23.3755
	rs3019260	A	C	A	C	0.1185	0.0430684	0.3173	FALSE	FALSE	FALSE	fVEXr4	101056576	0.077325	0.0243818	outcome	TRUE	reported	textfile	5.12495e-06	8	102068804	3657	0.02595	TRUE	reported	igd	2	TRUE	0.0056698	20.8413	23.3755
	rs3811215	T	G	T	G	-0.1332	0.0123089	0.3033	FALSE	FALSE	FALSE	fVEXr4	22485789	0.693646	0.031248	outcome	TRUE	reported	textfile	6.85993e-07	14	22954777	3657	0.02679	TRUE	reported	igd	2	TRUE	0.00671448	24.7073	23.3755
	rs4145212	A	T	A	T	0.1284	-0.0579577	0.5405	FALSE	TRUE	TRUE	fVEXr4	108307840	0.0366185	0.0277311	outcome	TRUE	reported	textfile	1.52901e-07	13	108960188	3657	0.02442	TRUE	reported	igd	2	FALSE	0.00750314	27.6313	23.3755
	rs62067029	T	A	T	A	-0.1669	-0.0304785	0.4148	FALSE	TRUE	TRUE	fVEXr4	39882138	0.195056	0.0235216	outcome	TRUE	reported	textfile	5.11505e-09	17	38038391	3657	0.0285	TRUE	reported	igd	2	FALSE	0.00929061	34.2756	23.3755
	rs67017503	A	C	A	C	0.2021	-0.0739363	0.0759	FALSE	FALSE	FALSE	fVEXr4	76284910	0.128087	0.0485883	outcome	TRUE	reported	textfile	9.09704e-06	17	74280991	3657	0.04547	TRUE	reported	igd	2	TRUE	0.00537301	19.7445	23.3755
	rs701839	G	A	G	A	0.1309	-0.0524575	0.7123	FALSE	FALSE	FALSE	fVEXr4	101195537	0.0371843	0.0251748	outcome	TRUE	reported	textfile	2.713e-06	10	102955294	3657	0.02785	TRUE	reported	igd	2	TRUE	0.00600466	22.0796	23.3755
	rs71615254	C	A	C	A	-0.3043	-0.00417705	0.0406	FALSE	FALSE	FALSE	fVEXr4	177737259	0.923987	0.0437788	outcome	TRUE	reported	textfile	7.40406e-07	4	178658413	3657	0.06135	TRUE	reported	igd	2	TRUE	0.00668248	24.5888	23.3755
	rs77110486	T	C	T	C	0.522	0.0466821	0.0107	FALSE	FALSE	FALSE	fVEXr4	57783961	0.409864	0.056644	outcome	TRUE	reported	textfile	8.14798e-06	20	56359017	3657	0.1168	TRUE	reported	igd	2	TRUE	0.00543206	19.9626	23.3755
GCST90001401	rs1047792	T	G	T	G	-0.1467	-0.00400993	0.176	FALSE	FALSE	FALSE	YWP59o	6539933	0.889263	0.0287994	outcome	TRUE	reported	textfile	6.49995e-06	12	6649099	3656	0.03249	TRUE	reported	igd	2	TRUE	0.00554549	20.3762	25.4312
	rs112432445	A	G	A	G	0.2796	-0.0606974	0.0528	FALSE	FALSE	FALSE	YWP59o	4162626	0.595004	0.114179	outcome	TRUE	reported	textfile	5.767e-07	9	4162626	3656	0.05583	TRUE	reported	igd	2	TRUE	0.0068134	25.0669	25.4312
	rs113442137	A	G	A	G	-0.2567	-0.0351587	0.0472	FALSE	FALSE	FALSE	YWP59o	160285165	0.408239	0.0425138	outcome	TRUE	reported	textfile	8.20994e-06	1	160254955	3656	0.05748	TRUE	reported	igd	2	TRUE	0.00542562	19.9334	25.4312
	rs11661511	C	T	C	T	-0.1204	0.0163179	0.6704	FALSE	FALSE	FALSE	YWP59o	63185025	0.504382	0.0244423	outcome	TRUE	reported	textfile	5.03999e-06	18	60852258	3656	0.02636	TRUE	reported	igd	2	TRUE	0.00567394	20.8509	25.4312
	rs11688492	C	T	C	T	-0.1216	-0.0285957	0.5196	FALSE	FALSE	FALSE	YWP59o	64638670	0.235585	0.0241091	outcome	TRUE	reported	textfile	1.243e-06	2	64865804	3656	0.02504	TRUE	reported	igd	2	TRUE	0.00640914	23.5701	25.4312
	rs117833074	C	T	C	T	-0.1795	-0.00941698	0.1146	FALSE	FALSE	FALSE	YWP59o	77158127	0.849253	0.0495445	outcome	TRUE	reported	textfile	8.64908e-06	12	77551907	3656	0.0403	TRUE	reported	igd	2	TRUE	0.00539712	19.8281	25.4312
	rs11843493	C	A	C	A	-0.1109	-0.0246785	0.4944	FALSE	FALSE	FALSE	YWP59o	46953822	0.297476	0.023687	outcome	TRUE	reported	textfile	8.19691e-06	13	47527957	3656	0.02482	TRUE	reported	igd	2	TRUE	0.00543111	19.9536	25.4312
	rs12129123	T	C	T	C	-0.1387	-0.000493267	0.2221	FALSE	FALSE	FALSE	YWP59o	10023651	0.990824	0.0428908	outcome	TRUE	reported	textfile	7.36207e-06	1	10083709	3656	0.0309	TRUE	reported	igd	2	TRUE	0.00548079	20.1372	25.4312
	rs13099360	G	A	G	A	-0.263	0.00815685	0.0466	FALSE	FALSE	FALSE	YWP59o	60491142	0.881158	0.0545603	outcome	TRUE	reported	textfile	9.95612e-06	3	60476875	3656	0.05944	TRUE	reported	igd	2	TRUE	0.00532633	19.5666	25.4312
	rs144306835	A	G	A	G	0.3826	-0.0405636	0.0234	FALSE	FALSE	FALSE	YWP59o	95344755	0.438253	0.0523302	outcome	TRUE	reported	textfile	1.617e-06	8	96356983	3656	0.07964	TRUE	reported	igd	2	TRUE	0.00627319	23.0669	25.4312
	rs185621536	T	C	T	C	-0.3205	-0.0679277	0.0312	FALSE	FALSE	FALSE	YWP59o	112981879	0.371551	0.0760183	outcome	TRUE	reported	textfile	4.89396e-06	1	113524501	3656	0.07004	TRUE	reported	igd	2	TRUE	0.00569478	20.9279	25.4312
	rs2250246	G	A	G	A	0.1359	0.0249801	0.5341	FALSE	FALSE	FALSE	YWP59o	6443850	0.303163	0.0242602	outcome	TRUE	reported	textfile	3.12903e-08	12	6553016	3656	0.02451	TRUE	reported	igd	2	TRUE	0.00833891	30.7266	25.4312
	rs35574803	C	T	C	T	-0.2808	-0.0818995	0.0562	FALSE	FALSE	FALSE	YWP59o	32491754	0.482266	0.116556	outcome	TRUE	reported	textfile	2.01999e-07	3	32533246	3656	0.05393	TRUE	reported	igd	2	TRUE	0.00736069	27.0954	25.4312
	rs406298	G	C	G	C	0.1135	-0.0156506	0.5327	FALSE	TRUE	TRUE	YWP59o	16299092	0.508259	0.0236574	outcome	TRUE	reported	textfile	3.38602e-06	19	16409903	3656	0.0244	TRUE	reported	igd	2	FALSE	0.0058836	21.6259	25.4312
	rs421516	A	C	A	C	-0.2897	-0.133276	0.9583	FALSE	FALSE	FALSE	YWP59o	65139471	0.546699	0.221126	outcome	TRUE	reported	textfile	3.96798e-06	17	63135589	3656	0.0627	TRUE	reported	igd	2	TRUE	0.00580533	21.3366	25.4312
	rs4239702	C	T	C	T	0.2841	0.0723482	0.6002	FALSE	FALSE	FALSE	YWP59o	46120612	0.00512802	0.025849	outcome	TRUE	reported	textfile	1.6421e-27	20	44749251	3656	0.02593	TRUE	reported	igd	2	TRUE	0.0317907	119.977	25.4312
	rs59951351	T	A	T	A	0.173	0.0202817	0.1171	FALSE	TRUE	TRUE	YWP59o	38150469	0.705451	0.053659	outcome	TRUE	reported	textfile	8.37298e-06	4	38152090	3656	0.03878	TRUE	reported	igd	2	FALSE	0.00541393	19.8902	25.4312
	rs61786059	T	G	T	G	-0.1238	-0.0526927	0.3135	FALSE	FALSE	FALSE	YWP59o	28709246	0.0519745	0.0271144	outcome	TRUE	reported	textfile	4.44601e-06	1	29035758	3656	0.02692	TRUE	reported	igd	2	TRUE	0.00575148	21.1375	25.4312
	rs72953104	G	C	G	C	0.2313	-0.0230652	0.0643	FALSE	TRUE	TRUE	YWP59o	40913911	0.463294	0.0314483	outcome	TRUE	reported	textfile	4.17503e-06	1	41379583	3656	0.05018	TRUE	reported	igd	2	FALSE	0.00577786	21.235	25.4312
	rs72977632	A	T	A	T	-0.2296	0.0237417	0.0643	FALSE	TRUE	TRUE	YWP59o	1930175	0.515373	0.036498	outcome	TRUE	reported	textfile	5.325e-06	19	1930174	3656	0.05036	TRUE	reported	igd	2	FALSE	0.00565333	20.7747	25.4312
	rs74356874	A	G	A	G	0.6631	-0.120564	0.0066	FALSE	FALSE	FALSE	YWP59o	22936453	0.0972747	0.0727074	outcome	TRUE	reported	textfile	5.96499e-06	5	22936562	3656	0.1462	TRUE	reported	igd	2	TRUE	0.00559526	20.5601	25.4312
	rs7518494	A	G	A	G	0.2278	-0.0107128	0.9334	FALSE	FALSE	FALSE	YWP59o	217060104	0.81025	0.0446175	outcome	TRUE	reported	textfile	3.211e-06	1	217233446	3656	0.04884	TRUE	reported	igd	2	TRUE	0.00591525	21.743	25.4312
	rs7606024	A	T	A	T	-0.1375	0.0104965	0.7882	FALSE	TRUE	TRUE	YWP59o	56389460	0.791292	0.0396647	outcome	TRUE	reported	textfile	6.15404e-06	2	56616595	3656	0.03037	TRUE	reported	igd	2	FALSE	0.00557547	20.487	25.4312
	rs77126700	C	T	C	T	0.3825	-0.21381	0.0239	FALSE	FALSE	FALSE	YWP59o	48697349	0.0767149	0.120792	outcome	TRUE	reported	textfile	1.95101e-06	20	47313887	3656	0.08026	TRUE	reported	igd	2	TRUE	0.00617403	22.7001	25.4312
	rs78763642	A	G	A	G	-0.3304	0.0359945	0.0279	FALSE	FALSE	FALSE	YWP59o	25294310	0.347521	0.0383162	outcome	TRUE	reported	textfile	9.2841e-06	9	25294308	3656	0.07442	TRUE	reported	igd	2	TRUE	0.0053624	19.6999	25.4312
	rs909692	G	C	G	C	-0.1107	0.00366322	0.4683	FALSE	TRUE	TRUE	YWP59o	50272204	0.877261	0.023719	outcome	TRUE	reported	textfile	9.356e-06	22	50710633	3656	0.02495	TRUE	reported	igd	2	FALSE	0.00535569	19.6751	25.4312
	rs9615714	G	A	G	A	-0.1733	0.000391029	0.1421	FALSE	FALSE	FALSE	YWP59o	47981214	0.992041	0.0391974	outcome	TRUE	reported	textfile	6.94592e-07	22	48376963	3656	0.03486	TRUE	reported	igd	2	TRUE	0.00671445	24.7004	25.4312
GCST90001402	rs11068290	T	C	T	C	-0.407	-0.0508669	0.0231	FALSE	FALSE	FALSE	RUtlI8	109790250	0.454404	0.0679954	outcome	TRUE	reported	textfile	7.305e-07	12	110228055	3657	0.08203	TRUE	reported	igd	2	TRUE	0.00668659	24.604	22.6355
	rs11204752	C	T	C	T	0.1189	-0.0336041	0.5387	FALSE	FALSE	FALSE	RUtlI8	150985657	0.154577	0.0236059	outcome	TRUE	reported	textfile	3.58501e-06	1	150958133	3657	0.02561	TRUE	reported	igd	2	TRUE	0.00585959	21.543	22.6355
	rs114917376	G	A	G	A	0.1985	-0.0426613	0.0958	FALSE	FALSE	FALSE	RUtlI8	53686807	0.275134	0.0390916	outcome	TRUE	reported	textfile	3.74197e-06	17	51764168	3657	0.04285	TRUE	reported	igd	2	TRUE	0.00583382	21.4478	22.6355
	rs138919897	G	A	G	A	-1.348	-0.122105	0.0019	FALSE	FALSE	FALSE	RUtlI8	107115948	0.345358	0.129399	outcome	TRUE	reported	textfile	8.49298e-06	3	106834795	3657	0.3023	TRUE	reported	igd	2	TRUE	0.00540784	19.8731	22.6355
	rs140191306	T	C	T	C	-0.4624	0.32811	0.0179	FALSE	FALSE	FALSE	RUtlI8	2570753	0.0332751	0.154133	outcome	TRUE	reported	textfile	1.11199e-06	9	2570753	3657	0.09477	TRUE	reported	igd	2	TRUE	0.00646772	23.7934	22.6355
	rs1519529	G	C	G	C	0.1327	0.00455544	0.2363	FALSE	TRUE	TRUE	RUtlI8	136216687	0.887149	0.0321005	outcome	TRUE	reported	textfile	7.13806e-06	2	136974257	3657	0.02951	TRUE	reported	igd	2	FALSE	0.005499	20.21	22.6355
	rs17405603	T	A	T	A	-0.1414	-0.0259277	0.2841	FALSE	TRUE	TRUE	RUtlI8	145228777	0.319363	0.0260378	outcome	TRUE	reported	textfile	4.40301e-07	5	144608340	3657	0.02795	TRUE	reported	igd	2	FALSE	0.00694995	25.5798	22.6355
	rs2105800	A	G	A	G	-0.1181	-0.0186682	0.4881	FALSE	FALSE	FALSE	RUtlI8	90859548	0.44236	0.0243008	outcome	TRUE	reported	textfile	6.11406e-06	11	90592716	3657	0.02607	TRUE	reported	igd	2	TRUE	0.00558036	20.5107	22.6355
	rs2450220	T	C	T	C	0.1522	0.0362326	0.816	FALSE	FALSE	FALSE	RUtlI8	118311162	0.451678	0.048142	outcome	TRUE	reported	textfile	2.24698e-06	8	119323401	3657	0.03212	TRUE	reported	igd	2	TRUE	0.00610232	22.4409	22.6355
	rs55658041	T	G	T	G	1.008	-0.217795	0.0037	FALSE	FALSE	FALSE	RUtlI8	163370710	0.0364469	0.104113	outcome	TRUE	reported	textfile	1.75102e-06	4	164291862	3657	0.2105	TRUE	reported	igd	2	TRUE	0.00623128	22.9181	22.6355
	rs72757888	T	C	T	C	-0.5733	-0.0365309	0.01	FALSE	FALSE	FALSE	RUtlI8	232910217	0.469337	0.050488	outcome	TRUE	reported	textfile	2.36701e-06	1	233045963	3657	0.1213	TRUE	reported	igd	2	TRUE	0.00607117	22.3257	22.6355
	rs73426855	C	T	C	T	0.1769	0.0196318	0.1471	FALSE	FALSE	FALSE	RUtlI8	79663261	0.492725	0.0286186	outcome	TRUE	reported	textfile	5.427e-07	17	77637123	3657	0.03524	TRUE	reported	igd	2	TRUE	0.00684347	25.1853	22.6355
	rs9265880	C	T	C	T	-0.1543	0.0826361	0.4717	FALSE	FALSE	FALSE	RUtlI8	31345277	0.00497542	0.0294223	outcome	TRUE	reported	textfile	1.096e-06	6	31313054	3657	0.0316	TRUE	reported	igd	2	TRUE	0.00647754	23.8298	22.6355
GCST90001403	rs115218350	A	T	A	T	-1.838	0.0515466	0.0008	FALSE	TRUE	TRUE	CMvyRu	104428039	0.588796	0.0953539	outcome	TRUE	reported	textfile	4.61403e-06	3	104146883	3656	0.4006	TRUE	reported	igd	2	FALSE	0.00572492	21.0393	22.2583
	rs115414430	G	C	G	C	0.3537	0.0520004	0.0286	FALSE	TRUE	TRUE	CMvyRu	36493692	0.45655	0.0698423	outcome	TRUE	reported	textfile	2.19599e-06	2	36720835	3656	0.07458	TRUE	reported	igd	2	FALSE	0.00611442	22.4796	22.2583
	rs1161387	G	C	G	C	0.1297	-0.000243901	0.286	FALSE	TRUE	TRUE	CMvyRu	50631250	0.992306	0.0252924	outcome	TRUE	reported	textfile	8.86605e-06	6	50598963	3656	0.02914	TRUE	reported	igd	2	FALSE	0.00538949	19.7999	22.2583
	rs11653761	T	G	T	G	-0.1273	-0.00132543	0.592	FALSE	FALSE	FALSE	CMvyRu	2813241	0.955996	0.0240208	outcome	TRUE	reported	textfile	2.65497e-07	17	2716535	3656	0.02469	TRUE	reported	igd	2	TRUE	0.00721875	26.5691	22.2583
	rs117605782	A	G	A	G	0.9179	0.00704022	0.0034	FALSE	FALSE	FALSE	CMvyRu	48915804	0.931063	0.0813823	outcome	TRUE	reported	textfile	7.27998e-06	18	46442174	3656	0.2043	TRUE	reported	igd	2	TRUE	0.00549106	20.1751	22.2583
	rs11777835	C	T	C	T	-0.1238	-0.0135802	0.5715	FALSE	FALSE	FALSE	CMvyRu	143911935	0.566319	0.0236803	outcome	TRUE	reported	textfile	6.82606e-07	8	144986103	3656	0.02489	TRUE	reported	igd	2	TRUE	0.00672135	24.726	22.2583
	rs141352577	T	C	T	C	0.3583	0.169536	0.0235	FALSE	FALSE	FALSE	CMvyRu	8450324	0.101889	0.103644	outcome	TRUE	reported	textfile	5.91099e-06	3	8492010	3656	0.07898	TRUE	reported	igd	2	TRUE	0.00559777	20.5694	22.2583
	rs149462070	C	A	C	A	-0.7487	0.0387476	0.0056	FALSE	FALSE	FALSE	CMvyRu	13039878	0.561115	0.06667	outcome	TRUE	reported	textfile	5.05406e-06	21	14412199	3656	0.1638	TRUE	reported	igd	2	TRUE	0.00568207	20.8809	22.2583
	rs1519526	C	T	C	T	0.1511	0.0105611	0.1957	FALSE	FALSE	FALSE	CMvyRu	136209826	0.748419	0.0329288	outcome	TRUE	reported	textfile	1.34999e-06	2	136967396	3656	0.03122	TRUE	reported	igd	2	TRUE	0.00636624	23.4113	22.2583
	rs2454536	C	T	C	T	-0.1356	0.00125418	0.283	FALSE	FALSE	FALSE	CMvyRu	52004980	0.959748	0.0248497	outcome	TRUE	reported	textfile	1.02301e-06	10	53764740	3656	0.02771	TRUE	reported	igd	2	TRUE	0.00650736	23.9336	22.2583
	rs4076316	A	T	A	T	-0.1251	0.0112908	0.3005	FALSE	TRUE	TRUE	CMvyRu	167447406	0.642084	0.0242923	outcome	TRUE	reported	textfile	4.53503e-06	6	167859623	3656	0.02725	TRUE	reported	igd	2	FALSE	0.00573164	21.0642	22.2583
	rs421516	A	C	A	C	-0.2923	-0.133276	0.9583	FALSE	FALSE	FALSE	CMvyRu	65139471	0.546699	0.221126	outcome	TRUE	reported	textfile	3.03103e-06	17	63135589	3656	0.06252	TRUE	reported	igd	2	TRUE	0.00594326	21.8465	22.2583
	rs452973	T	G	T	G	0.1223	-0.0145127	0.2705	FALSE	FALSE	FALSE	CMvyRu	11308878	0.593696	0.0272035	outcome	TRUE	reported	textfile	9.50101e-06	5	11308990	3656	0.02758	TRUE	reported	igd	2	TRUE	0.00534969	19.6529	22.2583
	rs4697617	A	G	A	G	0.1212	0.00796628	0.7103	FALSE	FALSE	FALSE	CMvyRu	25769493	0.771873	0.0274771	outcome	TRUE	reported	textfile	7.07001e-06	4	25771115	3656	0.02695	TRUE	reported	igd	2	TRUE	0.00550156	20.2139	22.2583
	rs5994482	G	C	G	C	-0.1828	0.052304	0.103	FALSE	TRUE	TRUE	CMvyRu	32174886	0.0386518	0.0252936	outcome	TRUE	reported	textfile	6.51703e-06	22	32570873	3656	0.04049	TRUE	reported	igd	2	FALSE	0.00554416	20.3713	22.2583
	rs60508745	C	T	C	T	-0.1161	0.0307719	0.5137	FALSE	FALSE	FALSE	CMvyRu	40514570	0.198728	0.0239436	outcome	TRUE	reported	textfile	3.37202e-06	7	40554169	3656	0.02496	TRUE	reported	igd	2	TRUE	0.0058831	21.6241	22.2583
	rs62521107	T	C	T	C	-0.2543	-0.148484	0.058	FALSE	FALSE	FALSE	CMvyRu	117839715	0.357608	0.161408	outcome	TRUE	reported	textfile	2.146e-06	8	118851954	3656	0.05357	TRUE	reported	igd	2	TRUE	0.00612597	22.5223	22.2583
	rs73178168	T	C	T	C	0.16	0.00076984	0.1703	FALSE	FALSE	FALSE	CMvyRu	47235494	0.989489	0.0584372	outcome	TRUE	reported	textfile	1.77599e-06	13	47809629	3656	0.03344	TRUE	reported	igd	2	TRUE	0.00622286	22.8807	22.2583
	rs73185679	C	T	C	T	0.1794	-0.0975693	0.1041	FALSE	FALSE	FALSE	CMvyRu	186768074	0.0393604	0.0473546	outcome	TRUE	reported	textfile	6.65794e-06	3	186485863	3656	0.03978	TRUE	reported	igd	2	TRUE	0.00553223	20.3272	22.2583
	rs7595246	C	T	C	T	0.1458	-0.0659598	0.1893	FALSE	FALSE	FALSE	CMvyRu	237646014	0.0281093	0.0300396	outcome	TRUE	reported	textfile	3.01502e-06	2	238554657	3656	0.03118	TRUE	reported	igd	2	TRUE	0.00594521	21.8537	22.2583
	rs77741094	G	C	G	C	-0.5466	-0.132253	0.0126	FALSE	TRUE	TRUE	CMvyRu	40990492	0.0866483	0.07719	outcome	TRUE	reported	textfile	9.03192e-07	21	42362418	3656	0.1111	TRUE	reported	igd	2	FALSE	0.00657717	24.1921	22.2583
	rs80076964	C	G	C	G	0.481	0.0883293	0.0141	FALSE	TRUE	TRUE	CMvyRu	94014474	0.307799	0.08661	outcome	TRUE	reported	textfile	1.88499e-06	4	94935625	3656	0.1008	TRUE	reported	igd	2	FALSE	0.00618965	22.7579	22.2583
	rs9520836	G	A	G	A	0.1323	-0.0607499	0.5044	FALSE	FALSE	FALSE	CMvyRu	108304715	0.0317519	0.0282884	outcome	TRUE	reported	textfile	7.42694e-08	13	108957063	3656	0.02454	TRUE	reported	igd	2	TRUE	0.00788725	29.0491	22.2583
GCST90001404	rs10849436	A	G	A	G	0.1576	0.0327252	0.1595	FALSE	FALSE	FALSE	klAXcr	6300453	0.229445	0.0272304	outcome	TRUE	reported	textfile	3.01599e-06	12	6409619	3658	0.0337	TRUE	reported	igd	2	TRUE	0.0059432	21.8582	22.2495
	rs11089305	G	A	G	A	0.1338	-0.016561	0.2881	FALSE	FALSE	FALSE	klAXcr	19741838	0.506861	0.0249513	outcome	TRUE	reported	textfile	6.51793e-07	22	19729361	3658	0.02685	TRUE	reported	igd	2	TRUE	0.00674282	24.8191	22.2495
	rs11754551	C	T	C	T	0.2127	0.0403357	0.0681	FALSE	FALSE	FALSE	klAXcr	145309927	0.23504	0.0339675	outcome	TRUE	reported	textfile	8.67301e-06	6	145631063	3658	0.04774	TRUE	reported	igd	2	TRUE	0.00539729	19.8396	22.2495
	rs12412378	A	C	A	C	-0.1669	0.0360934	0.1607	FALSE	FALSE	FALSE	klAXcr	128684899	0.333545	0.0373252	outcome	TRUE	reported	textfile	3.77798e-07	10	130483163	3658	0.0328	TRUE	reported	igd	2	TRUE	0.00702843	25.8778	22.2495
	rs12709039	A	C	A	C	-0.1407	0.00816325	0.7365	FALSE	FALSE	FALSE	klAXcr	59827472	0.824243	0.0367564	outcome	TRUE	reported	textfile	4.57499e-07	16	59861376	3658	0.02784	TRUE	reported	igd	2	TRUE	0.006934	25.5277	22.2495
	rs138542577	C	G	C	G	0.3534	0.232567	0.0376	FALSE	TRUE	TRUE	klAXcr	16217296	0.0112455	0.0917433	outcome	TRUE	reported	textfile	3.708e-08	8	16074805	3658	0.06406	TRUE	reported	igd	2	FALSE	0.0082512	30.4174	22.2495
	rs140642786	A	G	A	G	0.1711	0.0818503	0.1223	FALSE	FALSE	FALSE	klAXcr	149547932	0.0677813	0.0448138	outcome	TRUE	reported	textfile	4.75499e-06	5	148927495	3658	0.03733	TRUE	reported	igd	2	TRUE	0.00571023	20.9965	22.2495
	rs150152228	G	A	G	A	-1.507	0.138459	0.0012	FALSE	FALSE	FALSE	klAXcr	234370010	0.170957	0.101129	outcome	TRUE	reported	textfile	6.01395e-06	2	235278654	3658	0.3325	TRUE	reported	igd	2	TRUE	0.00558428	20.5308	22.2495
	rs185836310	C	T	C	T	-0.257	0.0537418	0.051	FALSE	FALSE	FALSE	klAXcr	71745091	0.541437	0.0880088	outcome	TRUE	reported	textfile	4.23e-06	10	73504848	3658	0.05578	TRUE	reported	igd	2	TRUE	0.00576969	21.2164	22.2495
	rs187723151	A	G	A	G	-0.9069	-0.205726	0.004	FALSE	FALSE	FALSE	klAXcr	242022917	0.250779	0.179132	outcome	TRUE	reported	textfile	2.52e-06	1	242186219	3658	0.1924	TRUE	reported	igd	2	TRUE	0.00603719	22.206	22.2495
	rs193552	T	A	T	A	0.1159	-0.0191756	0.6506	FALSE	TRUE	TRUE	klAXcr	148793036	0.432205	0.0244144	outcome	TRUE	reported	textfile	5.951e-06	5	148172599	3658	0.02556	TRUE	reported	igd	2	FALSE	0.00558943	20.5498	22.2495
	rs2019885	C	T	C	T	-0.1749	-0.0598798	0.1211	FALSE	FALSE	FALSE	klAXcr	163750843	0.175124	0.0441616	outcome	TRUE	reported	textfile	3.15798e-06	5	163177849	3658	0.03747	TRUE	reported	igd	2	TRUE	0.00592092	21.7758	22.2495
	rs2792563	A	G	A	G	-0.1287	0.0627342	0.5671	FALSE	FALSE	FALSE	klAXcr	212926883	0.00800756	0.0236577	outcome	TRUE	reported	textfile	3.14702e-07	1	213100225	3658	0.02511	TRUE	reported	igd	2	TRUE	0.00713037	26.2559	22.2495
	rs3138500	T	C	T	C	-0.2223	0.120571	0.0678	FALSE	FALSE	FALSE	klAXcr	89605030	0.174425	0.0887777	outcome	TRUE	reported	textfile	6.48993e-06	9	92219945	3658	0.04922	TRUE	reported	igd	2	TRUE	0.00554545	20.3872	22.2495
	rs34629	A	G	A	G	-0.2427	0.0328114	0.0633	FALSE	FALSE	FALSE	klAXcr	61231679	0.592801	0.0613547	outcome	TRUE	reported	textfile	1.31299e-06	5	60527506	3658	0.05008	TRUE	reported	igd	2	TRUE	0.00637952	23.4733	22.2495
	rs4458909	A	G	A	G	-0.1199	-0.00298318	0.3324	FALSE	FALSE	FALSE	klAXcr	117435058	0.93532	0.0367598	outcome	TRUE	reported	textfile	3.09599e-06	8	118447297	3658	0.02567	TRUE	reported	igd	2	TRUE	0.00592871	21.8046	22.2495
	rs55728331	A	G	A	G	1.708	0.0345029	0.0015	FALSE	FALSE	FALSE	klAXcr	117655725	0.513151	0.0527615	outcome	TRUE	reported	textfile	7.60694e-07	11	117526440	3658	0.3449	TRUE	reported	igd	2	TRUE	0.00665953	24.5105	22.2495
	rs61294310	G	A	G	A	0.5	0.277578	0.0124	FALSE	FALSE	FALSE	klAXcr	5266324	0.0193981	0.118735	outcome	TRUE	reported	textfile	4.853e-06	6	5266557	3658	0.1092	TRUE	reported	igd	2	TRUE	0.00569861	20.9535	22.2495
	rs62012610	C	G	C	G	0.2879	0.0675868	0.0381	FALSE	TRUE	TRUE	klAXcr	33713913	0.38088	0.0771296	outcome	TRUE	reported	textfile	4.51898e-06	15	34006114	3658	0.06268	TRUE	reported	igd	2	FALSE	0.00573435	21.0857	22.2495
	rs74326785	C	T	C	T	0.3429	0.0417206	0.0279	FALSE	FALSE	FALSE	klAXcr	24692471	0.523786	0.0654419	outcome	TRUE	reported	textfile	4.69397e-06	8	24549984	3658	0.07479	TRUE	reported	igd	2	TRUE	0.00571368	21.0092	22.2495
	rs76195952	T	C	T	C	-0.4648	-0.018411	0.0142	FALSE	FALSE	FALSE	klAXcr	129927860	0.813369	0.0779859	outcome	TRUE	reported	textfile	6.24698e-06	11	129797755	3658	0.1027	TRUE	reported	igd	2	TRUE	0.0055683	20.4717	22.2495
	rs78370279	G	A	G	A	0.5592	-0.0729475	0.0104	FALSE	FALSE	FALSE	klAXcr	71873913	0.513932	0.111758	outcome	TRUE	reported	textfile	3.54103e-06	7	71338898	3658	0.1204	TRUE	reported	igd	2	TRUE	0.00586252	21.5598	22.2495
	rs78804535	T	C	T	C	0.3286	0.024096	0.0316	FALSE	FALSE	FALSE	klAXcr	143498694	0.677409	0.0579227	outcome	TRUE	reported	textfile	3.46897e-06	4	144419847	3658	0.07069	TRUE	reported	igd	2	TRUE	0.00587243	21.5964	22.2495
	rs79423067	T	A	T	A	0.4869	0.049942	0.0149	FALSE	TRUE	TRUE	klAXcr	142952216	0.323657	0.0506013	outcome	TRUE	reported	textfile	4.44795e-06	4	143873369	3658	0.1059	TRUE	reported	igd	2	FALSE	0.00574568	21.1276	22.2495
	rs80148662	A	G	A	G	0.4702	-0.134179	0.0137	FALSE	FALSE	FALSE	klAXcr	54758878	0.0610085	0.071622	outcome	TRUE	reported	textfile	7.45504e-06	17	52836239	3658	0.1048	TRUE	reported	igd	2	TRUE	0.00547288	20.1189	22.2495
	rs8132059	T	C	T	C	-0.1288	-0.00728236	0.2243	FALSE	FALSE	FALSE	klAXcr	15543965	0.798446	0.0285182	outcome	TRUE	reported	textfile	7.73891e-06	21	16916284	3658	0.02877	TRUE	reported	igd	2	TRUE	0.00544923	20.0315	22.2495
	rs8191161	C	G	C	G	-0.2036	0.0508799	0.0832	FALSE	TRUE	TRUE	klAXcr	82069990	0.591962	0.0949259	outcome	TRUE	reported	textfile	5.427e-06	16	82103595	3658	0.0447	TRUE	reported	igd	2	FALSE	0.0056395	20.7349	22.2495
GCST90001405	rs10800645	A	G	A	G	0.1124	0.041815	0.5844	FALSE	FALSE	FALSE	VeeuiQ	199617812	0.077664	0.0236993	outcome	TRUE	reported	textfile	5.95498e-06	1	199586940	3657	0.02479	TRUE	reported	igd	2	TRUE	0.00559011	20.5467	21.3045
	rs112471525	G	A	G	A	0.3865	-0.0512729	0.0189	FALSE	FALSE	FALSE	VeeuiQ	54720542	0.39319	0.0600492	outcome	TRUE	reported	textfile	7.58298e-06	17	52797903	3657	0.0862	TRUE	reported	igd	2	TRUE	0.00546737	20.0931	21.3045
	rs116540222	T	C	T	C	1.671	-0.0143148	0.0011	FALSE	FALSE	FALSE	VeeuiQ	117612409	0.868738	0.086619	outcome	TRUE	reported	textfile	5.67806e-06	3	117331256	3657	0.3677	TRUE	reported	igd	2	TRUE	0.00561558	20.6409	21.3045
	rs12412378	A	C	A	C	-0.16	0.0360934	0.1608	FALSE	FALSE	FALSE	VeeuiQ	128684899	0.333545	0.0373252	outcome	TRUE	reported	textfile	7.18704e-07	10	130483163	3657	0.03222	TRUE	reported	igd	2	TRUE	0.006698	24.6463	21.3045
	rs148362575	T	A	T	A	2.566	0.0142835	0.0008	FALSE	TRUE	TRUE	VeeuiQ	186300608	0.881937	0.096176	outcome	TRUE	reported	textfile	3.02998e-06	2	187165335	3657	0.5486	TRUE	reported	igd	2	FALSE	0.00594684	21.8657	21.3045
	rs148389014	T	C	T	C	0.7633	-0.0354373	0.0051	FALSE	FALSE	FALSE	VeeuiQ	188364643	0.824382	0.159691	outcome	TRUE	reported	textfile	7.01601e-06	3	188082431	3657	0.1696	TRUE	reported	igd	2	TRUE	0.00550827	20.2442	21.3045
	rs149048155	C	A	C	A	-0.2902	0.00120648	0.036	FALSE	FALSE	FALSE	VeeuiQ	915545	0.99314	0.140319	outcome	TRUE	reported	textfile	7.45401e-06	3	957228	3657	0.06467	TRUE	reported	igd	2	TRUE	0.0054762	20.1257	21.3045
	rs149559870	T	C	T	C	0.4466	-0.00357315	0.0157	FALSE	FALSE	FALSE	VeeuiQ	39780530	0.968356	0.0900707	outcome	TRUE	reported	textfile	5.432e-06	8	39638049	3657	0.09807	TRUE	reported	igd	2	TRUE	0.00563877	20.7266	21.3045
	rs1681588	C	T	C	T	0.1086	-0.0310635	0.5559	FALSE	FALSE	FALSE	VeeuiQ	22629399	0.198491	0.0241577	outcome	TRUE	reported	textfile	6.61698e-06	14	23098304	3657	0.02407	TRUE	reported	igd	2	TRUE	0.00553569	20.3456	21.3045
	rs17765677	C	T	C	T	-0.3422	0.0372584	0.0304	FALSE	FALSE	FALSE	VeeuiQ	65965857	0.379249	0.0423737	outcome	TRUE	reported	textfile	1.34499e-06	16	65999760	3657	0.07069	TRUE	reported	igd	2	TRUE	0.00636715	23.4211	21.3045
	rs28652751	A	T	A	T	-0.1141	0.0110442	0.3179	FALSE	TRUE	TRUE	VeeuiQ	35465215	0.672216	0.0261026	outcome	TRUE	reported	textfile	8.85707e-06	22	35861208	3657	0.02564	TRUE	reported	igd	2	FALSE	0.00538598	19.7924	21.3045
	rs4506076	C	A	C	A	-0.1344	-0.00987385	0.8043	FALSE	FALSE	FALSE	VeeuiQ	8860060	0.743303	0.0301508	outcome	TRUE	reported	textfile	8.53591e-06	6	8860293	3657	0.03016	TRUE	reported	igd	2	TRUE	0.00540081	19.8472	21.3045
	rs4806937	A	C	A	C	-0.1145	-0.049107	0.3229	FALSE	FALSE	FALSE	VeeuiQ	3443407	0.0477408	0.0248057	outcome	TRUE	reported	textfile	7.79292e-06	19	3443405	3657	0.02557	TRUE	reported	igd	2	TRUE	0.00545318	20.0407	21.3045
	rs4820558	G	C	G	C	0.1172	-0.0267998	0.466	FALSE	TRUE	TRUE	VeeuiQ	20668599	0.281191	0.0248688	outcome	TRUE	reported	textfile	1.19399e-06	22	21022887	3657	0.02408	TRUE	reported	igd	2	FALSE	0.00643596	23.6758	21.3045
	rs6014246	A	G	A	G	-0.1186	0.0200996	0.3112	FALSE	FALSE	FALSE	VeeuiQ	54996495	0.418591	0.0248491	outcome	TRUE	reported	textfile	4.30299e-06	20	53613034	3657	0.02577	TRUE	reported	igd	2	TRUE	0.00575847	21.1691	21.3045
	rs61294310	G	A	G	A	0.5137	0.277578	0.0124	FALSE	FALSE	FALSE	VeeuiQ	5266324	0.0193981	0.118735	outcome	TRUE	reported	textfile	1.736e-06	6	5266557	3657	0.1072	TRUE	reported	igd	2	TRUE	0.00624002	22.9505	21.3045
	rs62353585	C	T	C	T	0.3653	-0.208728	0.0227	FALSE	FALSE	FALSE	VeeuiQ	167181559	0.067214	0.114044	outcome	TRUE	reported	textfile	3.53403e-06	4	168102710	3657	0.07865	TRUE	reported	igd	2	TRUE	0.00586439	21.5608	21.3045
	rs62519719	A	G	A	G	-0.1239	-0.0361562	0.2815	FALSE	FALSE	FALSE	VeeuiQ	117364728	0.367561	0.0401266	outcome	TRUE	reported	textfile	2.791e-06	8	118376967	3657	0.02639	TRUE	reported	igd	2	TRUE	0.00599141	22.0306	21.3045
	rs7185719	G	C	G	C	-0.1228	0.0105337	0.732	FALSE	TRUE	TRUE	VeeuiQ	59825362	0.773751	0.0366423	outcome	TRUE	reported	textfile	6.561e-06	16	59859266	3657	0.02721	TRUE	reported	igd	2	FALSE	0.00553863	20.3565	21.3045
	rs72883992	C	G	C	G	0.1932	-0.0877676	0.0807	FALSE	TRUE	TRUE	VeeuiQ	26895217	0.104466	0.054058	outcome	TRUE	reported	textfile	8.82104e-06	18	24475181	3657	0.04342	TRUE	reported	igd	2	FALSE	0.00538474	19.7878	21.3045
	rs74458303	A	G	A	G	2.692	0.0728997	0.0004	FALSE	FALSE	FALSE	VeeuiQ	120942288	0.5093	0.110466	outcome	TRUE	reported	textfile	2.89701e-06	2	121699864	3657	0.5745	TRUE	reported	igd	2	TRUE	0.00596823	21.9448	21.3045
	rs7449190	C	T	C	T	0.1236	-0.0708229	0.7401	FALSE	FALSE	FALSE	VeeuiQ	1297803	0.0247309	0.0315388	outcome	TRUE	reported	textfile	7.09807e-06	5	1297918	3657	0.02749	TRUE	reported	igd	2	TRUE	0.00549754	20.2046	21.3045
	rs74565954	T	C	T	C	0.4919	0.0240165	0.0135	FALSE	FALSE	FALSE	VeeuiQ	24662955	0.716633	0.0661679	outcome	TRUE	reported	textfile	2.10199e-06	8	24520468	3657	0.1035	TRUE	reported	igd	2	TRUE	0.00613866	22.5754	21.3045
	rs76709581	C	T	C	T	-0.1773	0.0415732	0.1061	FALSE	FALSE	FALSE	VeeuiQ	180147693	0.159725	0.0295685	outcome	TRUE	reported	textfile	4.06097e-06	5	179574693	3657	0.03843	TRUE	reported	igd	2	TRUE	0.0057867	21.2735	21.3045
	rs80297308	T	C	T	C	1.467	-0.0758842	0.0015	FALSE	FALSE	FALSE	VeeuiQ	101828835	0.168653	0.0551266	outcome	TRUE	reported	textfile	1.911e-06	1	102294391	3657	0.3075	TRUE	reported	igd	2	TRUE	0.00618515	22.7474	21.3045
GCST90001406	rs10750504	A	C	A	C	-0.1775	-0.0588311	0.1135	FALSE	FALSE	FALSE	5OasZe	132286281	0.0417744	0.0288988	outcome	TRUE	reported	textfile	6.93202e-06	11	132156175	3657	0.03942	TRUE	reported	igd	2	TRUE	0.00551363	20.264	23.5663
	rs112570989	T	C	T	C	-0.4739	-0.186557	0.0149	FALSE	FALSE	FALSE	5OasZe	2756998	0.0161154	0.077529	outcome	TRUE	reported	textfile	3.63203e-06	12	2866164	3657	0.1022	TRUE	reported	igd	2	TRUE	0.00584522	21.4899	23.5663
	rs115405874	G	A	G	A	0.9926	-0.125356	0.0037	FALSE	FALSE	FALSE	5OasZe	120407121	0.0164441	0.0522555	outcome	TRUE	reported	textfile	8.60994e-07	5	119742816	3657	0.2014	TRUE	reported	igd	2	TRUE	0.00659826	24.2768	23.5663
	rs116391651	A	G	A	G	0.426	0.15039	0.0161	FALSE	FALSE	FALSE	5OasZe	182978616	0.0528859	0.0776867	outcome	TRUE	reported	textfile	9.69393e-06	2	183843344	3657	0.09616	TRUE	reported	igd	2	TRUE	0.00533803	19.6152	23.5663
	rs116844769	A	G	A	G	0.2839	-0.117798	0.0662	FALSE	FALSE	FALSE	5OasZe	65247177	0.0753217	0.0662347	outcome	TRUE	reported	textfile	2.26199e-08	14	65713895	3657	0.05066	TRUE	reported	igd	2	TRUE	0.00851455	31.3879	23.5663
	rs140191306	T	C	T	C	-0.4176	0.32811	0.0179	FALSE	FALSE	FALSE	5OasZe	2570753	0.0332751	0.154133	outcome	TRUE	reported	textfile	8.96396e-06	9	2570753	3657	0.09392	TRUE	reported	igd	2	TRUE	0.00537698	19.7591	23.5663
	rs145123647	T	C	T	C	-1.082	-0.185798	0.003	FALSE	FALSE	FALSE	5OasZe	26670665	0.00429566	0.0650645	outcome	TRUE	reported	textfile	1.48898e-06	10	26959594	3657	0.2244	TRUE	reported	igd	2	TRUE	0.0063173	23.2365	23.5663
	rs149876490	T	C	T	C	-1.002	-0.0155029	0.0027	FALSE	FALSE	FALSE	5OasZe	16341745	0.741068	0.046916	outcome	TRUE	reported	textfile	7.993e-06	1	16668240	3657	0.224	TRUE	reported	igd	2	TRUE	0.00544183	19.9987	23.5663
	rs329966	G	A	G	A	0.1104	0.0139082	0.5425	FALSE	FALSE	FALSE	5OasZe	52567364	0.578376	0.0250256	outcome	TRUE	reported	textfile	8.72509e-06	19	53070617	3657	0.02479	TRUE	reported	igd	2	TRUE	0.005394	19.822	23.5663
	rs35698683	G	A	G	A	-0.2768	-0.0563869	0.0447	FALSE	FALSE	FALSE	5OasZe	11588619	0.263526	0.0504312	outcome	TRUE	reported	textfile	3.09899e-06	4	11590243	3657	0.05925	TRUE	reported	igd	2	TRUE	0.00593262	21.8131	23.5663
	rs4658141	C	T	C	T	-0.1354	-0.0236967	0.3805	FALSE	FALSE	FALSE	5OasZe	89348383	0.334405	0.0245491	outcome	TRUE	reported	textfile	1.73201e-07	1	89814066	3657	0.02587	TRUE	reported	igd	2	TRUE	0.00743496	27.3783	23.5663
	rs55710170	A	G	A	G	-0.1745	0.0335099	0.1181	FALSE	FALSE	FALSE	5OasZe	16374638	0.406114	0.0403369	outcome	TRUE	reported	textfile	4.11604e-06	3	16416145	3657	0.03783	TRUE	reported	igd	2	TRUE	0.0057846	21.2657	23.5663
	rs60515154	T	C	T	C	0.1306	0.00866116	0.7517	FALSE	FALSE	FALSE	5OasZe	47912528	0.778551	0.0307999	outcome	TRUE	reported	textfile	6.30304e-06	4	47914545	3657	0.02887	TRUE	reported	igd	2	TRUE	0.00556473	20.4529	23.5663
	rs61896866	A	G	A	G	0.1294	-0.0731956	0.2428	FALSE	FALSE	FALSE	5OasZe	111447440	0.031057	0.0339443	outcome	TRUE	reported	textfile	6.71506e-06	11	111318165	3657	0.0287	TRUE	reported	igd	2	TRUE	0.00552805	20.3174	23.5663
	rs62398379	C	T	C	T	0.1256	-0.0156465	0.4032	FALSE	FALSE	FALSE	5OasZe	37617671	0.524669	0.024595	outcome	TRUE	reported	textfile	1.28301e-06	6	37585447	3657	0.0259	TRUE	reported	igd	2	TRUE	0.00638956	23.504	23.5663
	rs633090	T	A	T	A	0.115	0.0239968	0.3414	FALSE	TRUE	TRUE	5OasZe	13075859	0.312736	0.023771	outcome	TRUE	reported	textfile	7.96196e-06	8	12933368	3657	0.02571	TRUE	reported	igd	2	FALSE	0.00544123	19.9965	23.5663
	rs690488	A	C	A	C	0.1701	-0.000780408	0.8588	FALSE	FALSE	FALSE	5OasZe	40183118	0.976326	0.0262982	outcome	TRUE	reported	textfile	2.43703e-06	5	40183220	3657	0.03602	TRUE	reported	igd	2	TRUE	0.00606116	22.2886	23.5663
	rs72635970	G	T	G	T	0.3572	-0.0843206	0.0444	FALSE	FALSE	FALSE	5OasZe	73641850	0.195737	0.0651732	outcome	TRUE	reported	textfile	5.44703e-09	2	73868977	3657	0.06109	TRUE	reported	igd	2	TRUE	0.00926225	34.17	23.5663
	rs72844588	A	G	A	G	0.2178	-0.0432547	0.0913	FALSE	FALSE	FALSE	5OasZe	137662584	0.18981	0.0329901	outcome	TRUE	reported	textfile	4.671e-07	2	138420154	3657	0.04314	TRUE	reported	igd	2	TRUE	0.00692172	25.4752	23.5663
	rs72914692	A	G	A	G	0.4209	-0.119307	0.018	FALSE	FALSE	FALSE	5OasZe	56755764	0.180052	0.0889958	outcome	TRUE	reported	textfile	6.44896e-06	18	54422995	3657	0.09317	TRUE	reported	igd	2	TRUE	0.00554963	20.3971	23.5663
	rs7412746	T	C	T	C	-0.138	0.031981	0.5153	FALSE	FALSE	FALSE	5OasZe	150887995	0.177187	0.023699	outcome	TRUE	reported	textfile	6.03295e-08	1	150860471	3657	0.02542	TRUE	reported	igd	2	TRUE	0.00799459	29.4557	23.5663
	rs75766272	T	C	T	C	-0.468	-0.0296118	0.0201	FALSE	FALSE	FALSE	5OasZe	7949925	0.521078	0.046147	outcome	TRUE	reported	textfile	6.601e-08	1	8009985	3657	0.08646	TRUE	reported	igd	2	TRUE	0.00794823	29.2835	23.5663
	rs76477280	G	A	G	A	0.4292	0.0586175	0.0206	FALSE	FALSE	FALSE	5OasZe	49573044	0.523181	0.0918122	outcome	TRUE	reported	textfile	1.14301e-06	13	50147180	3657	0.08807	TRUE	reported	igd	2	TRUE	0.00645249	23.737	23.5663
	rs77312528	G	T	G	T	-0.6233	-0.00665034	0.0107	FALSE	FALSE	FALSE	5OasZe	36384299	0.952774	0.112291	outcome	TRUE	reported	textfile	7.26993e-07	4	36385921	3657	0.1256	TRUE	reported	igd	2	TRUE	0.00668922	24.6137	23.5663
	rs77762131	C	G	C	G	0.2733	0.137884	0.045	FALSE	TRUE	TRUE	5OasZe	95739501	0.3189	0.138337	outcome	TRUE	reported	textfile	2.73401e-06	14	96205838	3657	0.05819	TRUE	reported	igd	2	FALSE	0.00599578	22.0468	23.5663
	rs895377	A	G	A	G	-0.1351	0.0153231	0.3683	FALSE	FALSE	FALSE	5OasZe	58754703	0.526538	0.0241956	outcome	TRUE	reported	textfile	2.13e-07	5	58050530	3657	0.02599	TRUE	reported	igd	2	TRUE	0.00733459	27.006	23.5663
	rs9270558	A	G	A	G	-0.1488	-0.0573691	0.5249	FALSE	FALSE	FALSE	5OasZe	32592890	0.016211	0.0238627	outcome	TRUE	reported	textfile	4.79899e-06	6	32560667	3657	0.03249	TRUE	reported	igd	2	TRUE	0.00570292	20.9637	23.5663
	rs9492229	C	T	C	T	0.3141	0.0182626	0.9556	FALSE	FALSE	FALSE	5OasZe	129088507	0.806642	0.0746141	outcome	TRUE	reported	textfile	2.74998e-07	6	129409652	3657	0.06101	TRUE	reported	igd	2	TRUE	0.00719569	26.4909	23.5663
	rs9584780	C	T	C	T	0.3691	-0.112716	0.0257	FALSE	FALSE	FALSE	5OasZe	98249015	0.367839	0.125167	outcome	TRUE	reported	textfile	1.754e-06	13	98901269	3657	0.07708	TRUE	reported	igd	2	TRUE	0.00623111	22.9175	23.5663
GCST90001407	rs10018308	G	A	G	A	0.1198	-0.0149574	0.3441	FALSE	FALSE	FALSE	B5Xm4V	119736744	0.5563	0.0254229	outcome	TRUE	reported	textfile	8.09003e-06	4	120657899	3656	0.0268	TRUE	reported	igd	2	TRUE	0.00543589	19.9713	23.0466
	rs11653761	T	G	T	G	-0.1161	-0.00132543	0.592	FALSE	FALSE	FALSE	B5Xm4V	2813241	0.955996	0.0240208	outcome	TRUE	reported	textfile	2.93799e-06	17	2716535	3656	0.02478	TRUE	reported	igd	2	TRUE	0.00596837	21.9394	23.0466
	rs12216018	T	C	T	C	-0.1641	0.00714764	0.1415	FALSE	FALSE	FALSE	B5Xm4V	130193445	0.79838	0.0279812	outcome	TRUE	reported	textfile	5.39399e-06	6	130514590	3656	0.03601	TRUE	reported	igd	2	TRUE	0.00564813	20.7555	23.0466
	rs12763172	C	T	C	T	0.1259	-0.0362088	0.7213	FALSE	FALSE	FALSE	B5Xm4V	83687763	0.123533	0.0235105	outcome	TRUE	reported	textfile	6.26801e-06	10	85447519	3656	0.02783	TRUE	reported	igd	2	TRUE	0.00556666	20.4544	23.0466
	rs12874404	G	A	G	A	0.173	-0.0269776	0.3256	FALSE	FALSE	FALSE	B5Xm4V	108341146	0.67766	0.0649035	outcome	TRUE	reported	textfile	9.13903e-11	13	108993494	3656	0.02661	TRUE	reported	igd	2	TRUE	0.0114289	42.244	23.0466
	rs139196765	G	A	G	A	1.204	0.127568	0.0025	FALSE	FALSE	FALSE	B5Xm4V	24488617	0.541077	0.208722	outcome	TRUE	reported	textfile	1.89802e-06	15	24733764	3656	0.2523	TRUE	reported	igd	2	TRUE	0.00619035	22.7604	23.0466
	rs144295598	A	G	A	G	0.6102	0.0866662	0.0103	FALSE	FALSE	FALSE	B5Xm4V	44768291	0.491261	0.125912	outcome	TRUE	reported	textfile	4.46303e-07	22	45164171	3656	0.1207	TRUE	reported	igd	2	TRUE	0.00694222	25.5442	23.0466
	rs16867231	A	G	A	G	0.538	-0.0321788	0.0108	FALSE	FALSE	FALSE	B5Xm4V	180185296	0.667275	0.0748534	outcome	TRUE	reported	textfile	3.44897e-06	2	181050023	3656	0.1157	TRUE	reported	igd	2	TRUE	0.00587937	21.6103	23.0466
	rs17708396	A	C	A	C	2.504	0.0509032	0.0005	FALSE	FALSE	FALSE	B5Xm4V	149030687	0.302661	0.0493849	outcome	TRUE	reported	textfile	1.67699e-06	5	148410250	3656	0.522	TRUE	reported	igd	2	TRUE	0.00625456	22.998	23.0466
	rs2879633	A	G	A	G	-0.1301	-0.00481911	0.2884	FALSE	FALSE	FALSE	B5Xm4V	51997290	0.848285	0.0251905	outcome	TRUE	reported	textfile	2.84302e-06	10	53757050	3656	0.02775	TRUE	reported	igd	2	TRUE	0.00597612	21.968	23.0466
	rs36072728	T	C	T	C	0.305	-0.0280538	0.0356	FALSE	FALSE	FALSE	B5Xm4V	29427099	0.434725	0.0359143	outcome	TRUE	reported	textfile	5.80805e-06	11	29448646	3656	0.06718	TRUE	reported	igd	2	TRUE	0.00560624	20.6007	23.0466
	rs557577736	G	A	G	A	1.829	0.174798	0.001	FALSE	FALSE	FALSE	B5Xm4V	45649957	0.244948	0.150337	outcome	TRUE	reported	textfile	2.68701e-06	13	46224092	3656	0.3891	TRUE	reported	igd	2	TRUE	0.00600734	22.0835	23.0466
	rs61997631	G	C	G	C	-0.2972	-0.0825537	0.0432	FALSE	TRUE	TRUE	B5Xm4V	104134583	0.0901156	0.0487103	outcome	TRUE	reported	textfile	1.357e-06	14	104600920	3656	0.06141	TRUE	reported	igd	2	FALSE	0.00636561	23.4089	23.0466
	rs74565175	A	G	A	G	0.1371	0.0566595	0.2009	FALSE	FALSE	FALSE	B5Xm4V	81741262	0.11768	0.0362137	outcome	TRUE	reported	textfile	7.27394e-06	7	81370578	3656	0.03052	TRUE	reported	igd	2	TRUE	0.0054892	20.1682	23.0466
	rs77643931	G	T	G	T	0.1235	0.0614426	0.2798	FALSE	FALSE	FALSE	B5Xm4V	126408762	0.0911339	0.0363685	outcome	TRUE	reported	textfile	8.97408e-06	9	129171041	3656	0.02777	TRUE	reported	igd	2	TRUE	0.00538063	19.7672	23.0466
	rs77762131	C	G	C	G	0.2713	0.137884	0.045	FALSE	TRUE	TRUE	B5Xm4V	95739501	0.3189	0.138337	outcome	TRUE	reported	textfile	2.94503e-06	14	96205838	3656	0.05795	TRUE	reported	igd	2	FALSE	0.00595924	21.9056	23.0466
	rs9614226	G	T	G	T	-0.4235	-0.0714569	0.9792	FALSE	FALSE	FALSE	B5Xm4V	44292270	0.375465	0.0806256	outcome	TRUE	reported	textfile	1.22101e-06	22	44688150	3656	0.08713	TRUE	reported	igd	2	TRUE	0.00642049	23.6121	23.0466
GCST90001408	rs112570989	T	C	T	C	0.4852	-0.186557	0.0149	FALSE	FALSE	FALSE	0XmNDm	2756998	0.0161154	0.077529	outcome	TRUE	reported	textfile	2.19099e-06	12	2866164	3657	0.1023	TRUE	reported	igd	2	TRUE	0.00611367	22.4829	23.1131
	rs115405874	G	A	G	A	-1.013	-0.125356	0.0037	FALSE	FALSE	FALSE	0XmNDm	120407121	0.0164441	0.0522555	outcome	TRUE	reported	textfile	5.36896e-07	5	119742816	3657	0.2016	TRUE	reported	igd	2	TRUE	0.00685685	25.2348	23.1131
	rs116844769	A	G	A	G	-0.2677	-0.117798	0.0662	FALSE	FALSE	FALSE	0XmNDm	65247177	0.0753217	0.0662347	outcome	TRUE	reported	textfile	1.41599e-07	14	65713895	3657	0.05076	TRUE	reported	igd	2	TRUE	0.00754811	27.7982	23.1131
	rs13421263	T	C	T	C	0.2616	-0.0349503	0.0528	FALSE	FALSE	FALSE	0XmNDm	168325784	0.389887	0.0406483	outcome	TRUE	reported	textfile	3.61801e-06	2	169182294	3657	0.05638	TRUE	reported	igd	2	TRUE	0.00585263	21.5173	23.1131
	rs145123647	T	C	T	C	1.077	-0.185798	0.003	FALSE	FALSE	FALSE	0XmNDm	26670665	0.00429566	0.0650645	outcome	TRUE	reported	textfile	1.71902e-06	10	26959594	3657	0.2247	TRUE	reported	igd	2	TRUE	0.00624282	22.9608	23.1131
	rs149876490	T	C	T	C	1.014	-0.0155029	0.0027	FALSE	FALSE	FALSE	0XmNDm	16341745	0.741068	0.046916	outcome	TRUE	reported	textfile	6.30798e-06	1	16668240	3657	0.2243	TRUE	reported	igd	2	TRUE	0.00555741	20.4258	23.1131
	rs2334904	A	G	A	G	0.1801	-0.0727706	0.114	FALSE	FALSE	FALSE	0XmNDm	132263250	0.0110421	0.0286344	outcome	TRUE	reported	textfile	4.91405e-06	11	132133144	3657	0.03937	TRUE	reported	igd	2	TRUE	0.00568975	20.9151	23.1131
	rs2476213	T	C	T	C	0.1119	-0.0148552	0.5659	FALSE	FALSE	FALSE	0XmNDm	101959876	0.550318	0.0248713	outcome	TRUE	reported	textfile	9.30294e-06	13	102612226	3657	0.02521	TRUE	reported	igd	2	TRUE	0.00535866	19.6914	23.1131
	rs35698683	G	A	G	A	0.2687	-0.0563869	0.0447	FALSE	FALSE	FALSE	0XmNDm	11588619	0.263526	0.0504312	outcome	TRUE	reported	textfile	6.16595e-06	4	11590243	3657	0.05935	TRUE	reported	igd	2	TRUE	0.00557367	20.486	23.1131
	rs4658141	C	T	C	T	0.1371	-0.0236967	0.3805	FALSE	FALSE	FALSE	0XmNDm	89348383	0.334405	0.0245491	outcome	TRUE	reported	textfile	1.28499e-07	1	89814066	3657	0.0259	TRUE	reported	igd	2	TRUE	0.00760388	28.0051	23.1131
	rs55710170	A	G	A	G	0.1678	0.0335099	0.1181	FALSE	FALSE	FALSE	0XmNDm	16374638	0.406114	0.0403369	outcome	TRUE	reported	textfile	9.81002e-06	3	16416145	3657	0.03789	TRUE	reported	igd	2	TRUE	0.00533442	19.6019	23.1131
	rs61896866	A	G	A	G	-0.1306	-0.0731956	0.2428	FALSE	FALSE	FALSE	0XmNDm	111447440	0.031057	0.0339443	outcome	TRUE	reported	textfile	5.65601e-06	11	111318165	3657	0.02874	TRUE	reported	igd	2	TRUE	0.00561491	20.6384	23.1131
	rs62398379	C	T	C	T	-0.1251	-0.0156465	0.4032	FALSE	FALSE	FALSE	0XmNDm	37617671	0.524669	0.024595	outcome	TRUE	reported	textfile	1.46201e-06	6	37585447	3657	0.02593	TRUE	reported	igd	2	TRUE	0.00632454	23.2633	23.1131
	rs633090	T	A	T	A	-0.1163	0.0239968	0.3414	FALSE	TRUE	TRUE	0XmNDm	13075859	0.312736	0.023771	outcome	TRUE	reported	textfile	6.45996e-06	8	12933368	3657	0.02575	TRUE	reported	igd	2	FALSE	0.00554708	20.3877	23.1131
	rs690488	A	C	A	C	-0.1667	-0.000780408	0.8588	FALSE	FALSE	FALSE	0XmNDm	40183118	0.976326	0.0262982	outcome	TRUE	reported	textfile	3.98502e-06	5	40183220	3657	0.03608	TRUE	reported	igd	2	TRUE	0.00580344	21.3354	23.1131
	rs72635970	G	T	G	T	-0.3399	-0.0843206	0.0444	FALSE	FALSE	FALSE	0XmNDm	73641850	0.195737	0.0651732	outcome	TRUE	reported	textfile	3.01301e-08	2	73868977	3657	0.06121	TRUE	reported	igd	2	TRUE	0.00836153	30.8191	23.1131
	rs72844588	A	G	A	G	-0.2131	-0.0432547	0.0913	FALSE	FALSE	FALSE	0XmNDm	137662584	0.18981	0.0329901	outcome	TRUE	reported	textfile	8.50492e-07	2	138420154	3657	0.04321	TRUE	reported	igd	2	TRUE	0.00660685	24.3086	23.1131
	rs72914692	A	G	A	G	-0.4239	-0.119307	0.018	FALSE	FALSE	FALSE	0XmNDm	56755764	0.180052	0.0889958	outcome	TRUE	reported	textfile	5.72203e-06	18	54422995	3657	0.0933	TRUE	reported	igd	2	TRUE	0.00561299	20.6313	23.1131
	rs7412746	T	C	T	C	0.1312	0.031981	0.5153	FALSE	FALSE	FALSE	0XmNDm	150887995	0.177187	0.023699	outcome	TRUE	reported	textfile	2.74802e-07	1	150860471	3657	0.02547	TRUE	reported	igd	2	TRUE	0.00720352	26.5199	23.1131
	rs75766272	T	C	T	C	0.463	-0.0296118	0.0201	FALSE	FALSE	FALSE	0XmNDm	7949925	0.521078	0.046147	outcome	TRUE	reported	textfile	9.55103e-08	1	8009985	3657	0.0866	TRUE	reported	igd	2	TRUE	0.00775568	28.5686	23.1131
	rs76477280	G	A	G	A	-0.4222	0.0586175	0.0206	FALSE	FALSE	FALSE	0XmNDm	49573044	0.523181	0.0918122	outcome	TRUE	reported	textfile	1.76498e-06	13	50147180	3657	0.08821	TRUE	reported	igd	2	TRUE	0.00622535	22.8962	23.1131
	rs77312528	G	T	G	T	0.6035	-0.00665034	0.0107	FALSE	FALSE	FALSE	0XmNDm	36384299	0.952774	0.112291	outcome	TRUE	reported	textfile	1.68101e-06	4	36385921	3657	0.1258	TRUE	reported	igd	2	TRUE	0.0062538	23.0015	23.1131
	rs77762131	C	G	C	G	-0.2722	0.137884	0.045	FALSE	TRUE	TRUE	0XmNDm	95739501	0.3189	0.138337	outcome	TRUE	reported	textfile	3.10099e-06	14	96205838	3657	0.05828	TRUE	reported	igd	2	FALSE	0.00592965	21.8022	23.1131
	rs895377	A	G	A	G	0.1314	0.0153231	0.3683	FALSE	FALSE	FALSE	0XmNDm	58754703	0.526538	0.0241956	outcome	TRUE	reported	textfile	4.65297e-07	5	58050530	3657	0.02603	TRUE	reported	igd	2	TRUE	0.00691993	25.4686	23.1131
	rs9270578	A	G	A	G	0.1477	-0.0574845	0.5261	FALSE	FALSE	FALSE	0XmNDm	32593316	0.0161165	0.0238895	outcome	TRUE	reported	textfile	6.89001e-06	6	32561093	3657	0.03279	TRUE	reported	igd	2	TRUE	0.0055176	20.2787	23.1131
	rs9492229	C	T	C	T	-0.3012	0.0182626	0.9556	FALSE	FALSE	FALSE	0XmNDm	129088507	0.806642	0.0746141	outcome	TRUE	reported	textfile	8.684e-07	6	129409652	3657	0.06111	TRUE	reported	igd	2	TRUE	0.0065991	24.28	23.1131
	rs9584780	C	T	C	T	-0.388	-0.112716	0.0257	FALSE	FALSE	FALSE	0XmNDm	98249015	0.367839	0.125167	outcome	TRUE	reported	textfile	5.199e-07	13	98901269	3657	0.07717	TRUE	reported	igd	2	TRUE	0.00686514	25.2656	23.1131
	rs9614418	G	C	G	C	-2.179	0.00795278	0.0005	FALSE	TRUE	TRUE	0XmNDm	44278263	0.940187	0.105987	outcome	TRUE	reported	textfile	6.418e-06	22	44674143	3657	0.4823	TRUE	reported	igd	2	FALSE	0.00555057	20.4006	23.1131
	rs974368	A	G	A	G	-0.1154	0.033576	0.5141	FALSE	FALSE	FALSE	0XmNDm	62542831	0.162897	0.024062	outcome	TRUE	reported	textfile	4.08e-06	14	63009549	3657	0.025	TRUE	reported	igd	2	TRUE	0.00579273	21.2958	23.1131
GCST90001409	rs10042327	A	G	A	G	0.233	0.0238904	0.0613	FALSE	FALSE	FALSE	ft9wz4	58982784	0.509549	0.0362228	outcome	TRUE	reported	textfile	7.40491e-06	5	58278611	3656	0.05192	TRUE	reported	igd	2	TRUE	0.00547836	20.1282	22.3957
	rs115150472	T	C	T	C	2.627	-0.0755266	0.0004	FALSE	FALSE	FALSE	ft9wz4	146759225	0.304257	0.073516	outcome	TRUE	reported	textfile	5.91398e-06	5	146138788	3656	0.579	TRUE	reported	igd	2	TRUE	0.0055991	20.5743	22.3957
	rs117344365	A	G	A	G	-0.4129	-0.0677178	0.0178	FALSE	FALSE	FALSE	ft9wz4	33490546	0.663467	0.155626	outcome	TRUE	reported	textfile	8.12905e-06	10	33779474	3656	0.09241	TRUE	reported	igd	2	TRUE	0.00543101	19.9533	22.3957
	rs12799241	A	G	A	G	0.138	0.0593951	0.2619	FALSE	FALSE	FALSE	ft9wz4	120110021	0.0495656	0.0302467	outcome	TRUE	reported	textfile	9.06797e-07	11	119980729	3656	0.02805	TRUE	reported	igd	2	TRUE	0.00657689	24.1911	22.3957
	rs139077655	T	C	T	C	-0.1159	0.0253569	0.382	FALSE	FALSE	FALSE	ft9wz4	131983954	0.287168	0.0238237	outcome	TRUE	reported	textfile	4.36697e-06	2	132741527	3656	0.02519	TRUE	reported	igd	2	TRUE	0.00575701	21.1579	22.3957
	rs143176410	C	G	C	G	1.819	-0.320961	0.001	FALSE	TRUE	TRUE	ft9wz4	84271633	0.027867	0.145947	outcome	TRUE	reported	textfile	7.65297e-06	16	84305239	3656	0.4058	TRUE	reported	igd	2	FALSE	0.00546581	20.0818	22.3957
	rs143397127	C	T	C	T	-0.4624	0.269617	0.0157	FALSE	FALSE	FALSE	ft9wz4	12807766	0.403168	0.322517	outcome	TRUE	reported	textfile	3.298e-06	7	12847391	3656	0.09926	TRUE	reported	igd	2	TRUE	0.0059008	21.6895	22.3957
	rs17056318	C	T	C	T	-0.2366	-0.00417479	0.081	FALSE	FALSE	FALSE	ft9wz4	158858945	0.935471	0.0515637	outcome	TRUE	reported	textfile	2.36499e-07	5	158285953	3656	0.0457	TRUE	reported	igd	2	TRUE	0.00727811	26.7892	22.3957
	rs189761842	T	C	T	C	0.7902	-0.0333735	0.0055	FALSE	FALSE	FALSE	ft9wz4	123725829	0.666627	0.0774721	outcome	TRUE	reported	textfile	3.91796e-06	10	125485345	3656	0.1709	TRUE	reported	igd	2	TRUE	0.00581369	21.3674	22.3957
	rs2286599	A	G	A	G	0.1183	0.0341952	0.32	FALSE	FALSE	FALSE	ft9wz4	6390367	0.383917	0.0392732	outcome	TRUE	reported	textfile	8.96004e-06	12	6499533	3656	0.0266	TRUE	reported	igd	2	TRUE	0.00538092	19.7683	22.3957
	rs2390504	A	G	A	G	-0.2668	-0.0188853	0.0486	FALSE	FALSE	FALSE	ft9wz4	21282052	0.500587	0.0280377	outcome	TRUE	reported	textfile	3.51002e-06	7	21321670	3656	0.05743	TRUE	reported	igd	2	TRUE	0.00586856	21.5703	22.3957
	rs2395904	G	T	G	T	-0.1445	0.000463352	0.2657	FALSE	FALSE	FALSE	ft9wz4	129605573	0.986168	0.026727	outcome	TRUE	reported	textfile	1.74e-07	8	130617819	3656	0.02761	TRUE	reported	igd	2	TRUE	0.00743627	27.3757	22.3957
	rs283340	C	T	C	T	0.1251	-0.0470964	0.5621	FALSE	FALSE	FALSE	ft9wz4	69281301	0.0489125	0.0239146	outcome	TRUE	reported	textfile	4.59505e-07	8	70193536	3656	0.02477	TRUE	reported	igd	2	TRUE	0.00692846	25.4932	22.3957
	rs34764986	C	T	C	T	-0.2347	-0.120795	0.0699	FALSE	FALSE	FALSE	ft9wz4	61351498	0.0877971	0.0707587	outcome	TRUE	reported	textfile	1.08201e-06	20	59926554	3656	0.04805	TRUE	reported	igd	2	TRUE	0.00648348	23.8452	22.3957
	rs35607968	T	C	T	C	0.1584	-0.0185096	0.1536	FALSE	FALSE	FALSE	ft9wz4	68188892	0.503509	0.0276684	outcome	TRUE	reported	textfile	3.71304e-06	7	67653879	3656	0.03419	TRUE	reported	igd	2	TRUE	0.00583665	21.4523	22.3957
	rs3811215	T	G	T	G	-0.1229	0.0123089	0.3032	FALSE	FALSE	FALSE	ft9wz4	22485789	0.693646	0.031248	outcome	TRUE	reported	textfile	5.33495e-06	14	22954777	3656	0.02697	TRUE	reported	igd	2	TRUE	0.00564776	20.7541	22.3957
	rs58114937	G	A	G	A	0.1702	-0.021487	0.1302	FALSE	FALSE	FALSE	ft9wz4	67244352	0.700979	0.0559558	outcome	TRUE	reported	textfile	2.84499e-06	12	67638132	3656	0.0363	TRUE	reported	igd	2	TRUE	0.00597718	21.9719	22.3957
	rs62067029	T	A	T	A	-0.1605	-0.0304785	0.4148	FALSE	TRUE	TRUE	ft9wz4	39882138	0.195056	0.0235216	outcome	TRUE	reported	textfile	2.34601e-08	17	38038391	3656	0.02868	TRUE	reported	igd	2	FALSE	0.00849339	31.3007	22.3957
	rs62115322	G	C	G	C	0.1382	0.00272352	0.2083	FALSE	TRUE	TRUE	ft9wz4	53345231	0.930881	0.0313999	outcome	TRUE	reported	textfile	3.31002e-06	19	53848484	3656	0.02968	TRUE	reported	igd	2	FALSE	0.00589541	21.6696	22.3957
	rs76263497	A	G	A	G	-0.1886	0.0243687	0.0989	FALSE	FALSE	FALSE	ft9wz4	60586605	0.444714	0.0318855	outcome	TRUE	reported	textfile	5.33703e-06	15	60878804	3656	0.04138	TRUE	reported	igd	2	TRUE	0.00564983	20.7618	22.3957
	rs76981518	T	C	T	C	-0.2134	-0.0342878	0.0744	FALSE	FALSE	FALSE	ft9wz4	151856055	0.598372	0.0650939	outcome	TRUE	reported	textfile	6.00897e-06	4	152777207	3656	0.04708	TRUE	reported	igd	2	TRUE	0.00558825	20.5342	22.3957
	rs77983244	A	G	A	G	-0.3088	0.01303	0.0325	FALSE	FALSE	FALSE	ft9wz4	7412708	0.759642	0.0425883	outcome	TRUE	reported	textfile	4.341e-06	17	7316027	3656	0.06711	TRUE	reported	igd	2	TRUE	0.00575793	21.1613	22.3957
	rs9564767	G	A	G	A	-0.1163	0.0082748	0.6075	FALSE	FALSE	FALSE	ft9wz4	70960403	0.730828	0.0240528	outcome	TRUE	reported	textfile	3.62602e-06	13	71534535	3656	0.02507	TRUE	reported	igd	2	TRUE	0.00585188	21.5086	22.3957
GCST90001410	rs10270812	C	T	C	T	-0.118	-0.0177242	0.5103	FALSE	FALSE	FALSE	kM5aYn	68561899	0.468554	0.0244527	outcome	TRUE	reported	textfile	1.38599e-06	7	68026886	3657	0.0244	TRUE	reported	igd	2	TRUE	0.00635464	23.3747	22.6546
	rs113087021	A	T	A	T	0.2024	-0.0929533	0.0766	FALSE	TRUE	TRUE	kM5aYn	97894784	0.179693	0.0692803	outcome	TRUE	reported	textfile	8.53002e-06	11	97765784	3657	0.04541	TRUE	reported	igd	2	FALSE	0.00540306	19.8555	22.6546
	rs11705673	G	C	G	C	0.1701	-0.0444883	0.12	FALSE	TRUE	TRUE	kM5aYn	44620757	0.270385	0.040364	outcome	TRUE	reported	textfile	3.95103e-06	22	45016637	3657	0.0368	TRUE	reported	igd	2	FALSE	0.00580842	21.3538	22.6546
	rs11938966	A	C	A	C	0.3165	0.00829703	0.0294	FALSE	FALSE	FALSE	kM5aYn	54520674	0.834687	0.0397569	outcome	TRUE	reported	textfile	6.1e-06	4	55386841	3657	0.06988	TRUE	reported	igd	2	TRUE	0.00557811	20.5024	22.6546
	rs12493961	G	A	G	A	0.3884	0.043176	0.0219	FALSE	FALSE	FALSE	kM5aYn	11203139	0.536271	0.069812	outcome	TRUE	reported	textfile	1.883e-06	3	11244825	3657	0.08136	TRUE	reported	igd	2	TRUE	0.00619318	22.7771	22.6546
	rs1250061	A	T	A	T	-0.1078	-0.011904	0.5554	FALSE	TRUE	TRUE	kM5aYn	215678132	0.625161	0.0243661	outcome	TRUE	reported	textfile	7.79399e-06	2	216542855	3657	0.02407	TRUE	reported	igd	2	FALSE	0.00545488	20.0469	22.6546
	rs12636371	A	G	A	G	0.1185	-0.0178312	0.4619	FALSE	FALSE	FALSE	kM5aYn	126175942	0.466654	0.0244955	outcome	TRUE	reported	textfile	9.60993e-07	3	125894785	3657	0.02414	TRUE	reported	igd	2	TRUE	0.00654613	24.0838	22.6546
	rs13075403	G	A	G	A	0.1247	0.0246861	0.7616	FALSE	FALSE	FALSE	kM5aYn	28788785	0.353189	0.0265893	outcome	TRUE	reported	textfile	8.55894e-06	3	28830276	3657	0.02799	TRUE	reported	igd	2	TRUE	0.00539823	19.8376	22.6546
	rs13235778	A	G	A	G	-0.1235	-0.0299262	0.2801	FALSE	FALSE	FALSE	kM5aYn	57491277	0.226459	0.024742	outcome	TRUE	reported	textfile	5.46298e-06	7	57550983	3657	0.02712	TRUE	reported	igd	2	TRUE	0.00563863	20.7261	22.6546
	rs137930158	C	G	C	G	-0.6636	0.033847	0.007	FALSE	TRUE	TRUE	kM5aYn	108650969	0.836879	0.164396	outcome	TRUE	reported	textfile	2.76102e-06	8	109663198	3657	0.1413	TRUE	reported	igd	2	FALSE	0.00599504	22.044	22.6546
	rs138542577	C	G	C	G	0.3227	0.232567	0.0376	FALSE	TRUE	TRUE	kM5aYn	16217296	0.0112455	0.0917433	outcome	TRUE	reported	textfile	3.63898e-07	8	16074805	3657	0.06331	TRUE	reported	igd	2	FALSE	0.0070543	25.9666	22.6546
	rs139843122	T	A	T	A	-0.5032	0.0417163	0.0123	FALSE	TRUE	TRUE	kM5aYn	107618103	0.568557	0.0731637	outcome	TRUE	reported	textfile	3.39899e-06	6	107939307	3657	0.1082	TRUE	reported	igd	2	FALSE	0.00587951	21.6167	22.6546
	rs148377259	C	T	C	T	-0.3437	-0.0794679	0.034	FALSE	FALSE	FALSE	kM5aYn	106666185	0.193197	0.0610737	outcome	TRUE	reported	textfile	2.037e-07	7	106306631	3657	0.06603	TRUE	reported	igd	2	TRUE	0.00735437	27.0794	22.6546
	rs188550599	G	A	G	A	0.44	0.188336	0.0142	FALSE	FALSE	FALSE	kM5aYn	15872702	0.225278	0.155314	outcome	TRUE	reported	textfile	7.33297e-06	8	15730211	3657	0.098	TRUE	reported	igd	2	TRUE	0.00548202	20.1472	22.6546
	rs238926	A	G	A	G	-0.1152	-0.0049241	0.369	FALSE	FALSE	FALSE	kM5aYn	114104488	0.836879	0.0239165	outcome	TRUE	reported	textfile	4.39805e-06	11	113975210	3657	0.02506	TRUE	reported	igd	2	TRUE	0.00574534	21.1206	22.6546
	rs2792563	A	G	A	G	-0.1407	0.0627342	0.567	FALSE	FALSE	FALSE	kM5aYn	212926883	0.00800756	0.0236577	outcome	TRUE	reported	textfile	1.494e-08	1	213100225	3657	0.02479	TRUE	reported	igd	2	TRUE	0.00873175	32.1957	22.6546
	rs478251	C	A	C	A	0.1745	0.0189357	0.1333	FALSE	FALSE	FALSE	kM5aYn	127957832	0.513477	0.0289787	outcome	TRUE	reported	textfile	6.44496e-07	11	127827727	3657	0.03499	TRUE	reported	igd	2	TRUE	0.00675514	24.858	22.6546
	rs7185719	G	C	G	C	-0.1257	0.0105337	0.732	FALSE	TRUE	TRUE	kM5aYn	59825362	0.773751	0.0366423	outcome	TRUE	reported	textfile	4.43803e-06	16	59859266	3657	0.02735	TRUE	reported	igd	2	FALSE	0.00574288	21.1115	22.6546
	rs76912165	G	A	G	A	0.4094	0.0450427	0.0209	FALSE	FALSE	FALSE	kM5aYn	93629638	0.50809	0.0680595	outcome	TRUE	reported	textfile	3.21699e-06	5	92965344	3657	0.08778	TRUE	reported	igd	2	TRUE	0.00591295	21.7404	22.6546
GCST90001411	rs11134931	A	G	A	G	-0.1214	0.0239079	0.6924	FALSE	FALSE	FALSE	eZyHTn	175807473	0.358172	0.0260192	outcome	TRUE	reported	textfile	8.45999e-06	5	175234476	3657	0.02723	TRUE	reported	igd	2	TRUE	0.00540584	19.8657	21.7696
	rs112570989	T	C	T	C	-0.4808	-0.186557	0.0149	FALSE	FALSE	FALSE	eZyHTn	2756998	0.0161154	0.077529	outcome	TRUE	reported	textfile	3.23601e-06	12	2866164	3657	0.1031	TRUE	reported	igd	2	TRUE	0.00591169	21.7357	21.7696
	rs11584183	C	T	C	T	-0.1336	0.00543992	0.2311	FALSE	FALSE	FALSE	eZyHTn	229994965	0.848001	0.0283818	outcome	TRUE	reported	textfile	9.70197e-06	1	230130712	3657	0.03015	TRUE	reported	igd	2	TRUE	0.00534057	19.6246	21.7696
	rs12874404	G	A	G	A	0.1313	-0.0269776	0.3257	FALSE	FALSE	FALSE	eZyHTn	108341146	0.67766	0.0649035	outcome	TRUE	reported	textfile	1.20301e-06	13	108993494	3657	0.027	TRUE	reported	igd	2	TRUE	0.00642507	23.6355	21.7696
	rs144479315	T	A	T	A	0.2862	0.00340615	0.0418	FALSE	TRUE	TRUE	eZyHTn	25995154	0.959596	0.0672343	outcome	TRUE	reported	textfile	6.54395e-06	18	23575118	3657	0.06339	TRUE	reported	igd	2	FALSE	0.00554318	20.3732	21.7696
	rs145371905	T	G	T	G	0.4126	0.0181739	0.0194	FALSE	FALSE	FALSE	eZyHTn	69751640	0.918231	0.177027	outcome	TRUE	reported	textfile	5.50402e-06	13	70325772	3657	0.09065	TRUE	reported	igd	2	TRUE	0.00563306	20.7055	21.7696
	rs147867176	T	A	T	A	-0.2834	-0.00144707	0.0418	FALSE	TRUE	TRUE	eZyHTn	168706142	0.990192	0.11772	outcome	TRUE	reported	textfile	7.04693e-06	6	169106376	3657	0.06299	TRUE	reported	igd	2	FALSE	0.00550471	20.2311	21.7696
	rs17256322	A	T	A	T	0.1207	-0.0161233	0.3234	FALSE	TRUE	TRUE	eZyHTn	4077618	0.521189	0.0251331	outcome	TRUE	reported	textfile	4.73097e-06	16	4127619	3657	0.02634	TRUE	reported	igd	2	FALSE	0.00570915	20.9868	21.7696
	rs35130455	A	T	A	T	-0.1204	0.0168008	0.704	FALSE	TRUE	TRUE	eZyHTn	92790349	0.581599	0.0304888	outcome	TRUE	reported	textfile	9.00306e-06	14	93256694	3657	0.02707	TRUE	reported	igd	2	FALSE	0.00538033	19.7715	21.7696
	rs45575344	C	T	C	T	-0.1674	0.0124477	0.1333	FALSE	FALSE	FALSE	eZyHTn	132682103	0.706379	0.033042	outcome	TRUE	reported	textfile	5.27898e-06	6	133003242	3657	0.0367	TRUE	reported	igd	2	TRUE	0.00565705	20.7942	21.7696
	rs45608038	G	A	G	A	0.2797	-0.0687024	0.0421	FALSE	FALSE	FALSE	eZyHTn	73451886	0.26876	0.0621222	outcome	TRUE	reported	textfile	9.25295e-06	2	73679013	3657	0.063	TRUE	reported	igd	2	TRUE	0.00536098	19.7	21.7696
	rs62562996	A	G	A	G	-0.4312	-0.0862479	0.0172	FALSE	FALSE	FALSE	eZyHTn	21576572	0.381539	0.0985619	outcome	TRUE	reported	textfile	2.51102e-06	9	21576571	3657	0.09145	TRUE	reported	igd	2	TRUE	0.00604273	22.2204	21.7696
	rs6781675	C	G	C	G	0.3685	0.0167486	0.0235	FALSE	TRUE	TRUE	eZyHTn	4366751	0.882168	0.112997	outcome	TRUE	reported	textfile	7.49307e-06	3	4408435	3657	0.08216	TRUE	reported	igd	2	FALSE	0.00547075	20.1056	21.7696
	rs7457479	C	T	C	T	-0.1289	0.0126865	0.2762	FALSE	FALSE	FALSE	eZyHTn	67028998	0.612527	0.0250488	outcome	TRUE	reported	textfile	7.625e-06	7	66493985	3657	0.02875	TRUE	reported	igd	2	TRUE	0.00546669	20.0906	21.7696
	rs75766272	T	C	T	C	-0.4552	-0.0296118	0.0201	FALSE	FALSE	FALSE	eZyHTn	7949925	0.521078	0.046147	outcome	TRUE	reported	textfile	1.99402e-07	1	8009985	3657	0.08737	TRUE	reported	igd	2	TRUE	0.00736789	27.1295	21.7696
	rs76477280	G	A	G	A	0.4747	0.0586175	0.0206	FALSE	FALSE	FALSE	eZyHTn	49573044	0.523181	0.0918122	outcome	TRUE	reported	textfile	1.07999e-07	13	50147180	3657	0.08918	TRUE	reported	igd	2	TRUE	0.00768824	28.3182	21.7696
	rs77762131	C	G	C	G	0.2816	0.137884	0.045	FALSE	TRUE	TRUE	eZyHTn	95739501	0.3189	0.138337	outcome	TRUE	reported	textfile	1.567e-06	14	96205838	3657	0.05855	TRUE	reported	igd	2	FALSE	0.00628562	23.1193	21.7696
	rs78269238	T	C	T	C	0.2453	-0.133993	0.0582	FALSE	FALSE	FALSE	eZyHTn	65207086	0.111524	0.0841991	outcome	TRUE	reported	textfile	7.14595e-06	14	65673804	3657	0.05457	TRUE	reported	igd	2	TRUE	0.00549502	20.1953	21.7696
	rs7988851	T	C	T	C	-0.1353	-0.00517798	0.3266	FALSE	FALSE	FALSE	eZyHTn	50793447	0.826542	0.0236287	outcome	TRUE	reported	textfile	4.79204e-07	13	51367583	3657	0.02683	TRUE	reported	igd	2	TRUE	0.00690589	25.4166	21.7696
	rs9369326	C	T	C	T	-0.1237	0.00608549	0.3121	FALSE	FALSE	FALSE	eZyHTn	42046130	0.798634	0.0238539	outcome	TRUE	reported	textfile	3.92103e-06	6	42013868	3657	0.02675	TRUE	reported	igd	2	TRUE	0.00581346	21.3724	21.7696
GCST90001412	rs10513789	G	T	G	T	0.1323	0.0376698	0.2261	FALSE	FALSE	FALSE	bY36VT	183042285	0.20376	0.02964	outcome	TRUE	reported	textfile	7.519e-06	3	182760073	3656	0.0295	TRUE	reported	igd	2	TRUE	0.00547125	20.1019	24.0447
	rs10749417	T	A	T	A	-0.1304	0.0219995	0.2247	FALSE	TRUE	TRUE	bY36VT	83686631	0.36961	0.0245201	outcome	TRUE	reported	textfile	6.46606e-06	10	85446387	3656	0.02887	TRUE	reported	igd	2	FALSE	0.00554931	20.3903	24.0447
	rs10942726	G	A	G	A	0.1176	0.0219064	0.3155	FALSE	FALSE	FALSE	bY36VT	74962160	0.387236	0.0253358	outcome	TRUE	reported	textfile	7.85507e-06	5	74257985	3656	0.02628	TRUE	reported	igd	2	TRUE	0.00544735	20.0136	24.0447
	rs11047113	C	A	C	A	-0.1831	0.0134122	0.1027	FALSE	FALSE	FALSE	bY36VT	23815675	0.681742	0.0327059	outcome	TRUE	reported	textfile	5.67296e-06	12	23968609	3656	0.04029	TRUE	reported	igd	2	TRUE	0.00561732	20.6417	24.0447
	rs11653761	T	G	T	G	-0.125	-0.00132543	0.592	FALSE	FALSE	FALSE	bY36VT	2813241	0.955996	0.0240208	outcome	TRUE	reported	textfile	2.83302e-07	17	2716535	3656	0.02429	TRUE	reported	igd	2	TRUE	0.00719158	26.4684	24.0447
	rs12595433	A	G	A	G	-0.1118	-0.000550187	0.4579	FALSE	FALSE	FALSE	bY36VT	62998446	0.983031	0.025868	outcome	TRUE	reported	textfile	5.79696e-06	15	63290645	3656	0.02462	TRUE	reported	igd	2	TRUE	0.00560865	20.6096	24.0447
	rs12874404	G	A	G	A	0.1963	-0.0269776	0.3256	FALSE	FALSE	FALSE	bY36VT	108341146	0.67766	0.0649035	outcome	TRUE	reported	textfile	5.61824e-14	13	108993494	3656	0.02601	TRUE	reported	igd	2	TRUE	0.0153405	56.9275	24.0447
	rs13132141	A	G	A	G	-0.1191	0.0299851	0.6385	FALSE	FALSE	FALSE	bY36VT	155818148	0.206354	0.0237288	outcome	TRUE	reported	textfile	3.304e-06	4	156739300	3656	0.02557	TRUE	reported	igd	2	TRUE	0.00589911	21.6833	24.0447
	rs139981802	C	T	C	T	0.3005	0.137401	0.0418	FALSE	FALSE	FALSE	bY36VT	107836003	0.276081	0.126152	outcome	TRUE	reported	textfile	5.22998e-07	13	108488351	3656	0.05978	TRUE	reported	igd	2	TRUE	0.00686404	25.2545	24.0447
	rs144607178	T	C	T	C	0.2175	-0.00561091	0.0636	FALSE	FALSE	FALSE	bY36VT	63788182	0.897477	0.0435463	outcome	TRUE	reported	textfile	9.7089e-06	7	63248560	3656	0.0491	TRUE	reported	igd	2	TRUE	0.00533857	19.6118	24.0447
	rs145371905	T	G	T	G	0.4292	0.0181739	0.0194	FALSE	FALSE	FALSE	bY36VT	69751640	0.918231	0.177027	outcome	TRUE	reported	textfile	1.02101e-06	13	70325772	3656	0.08767	TRUE	reported	igd	2	TRUE	0.00651289	23.9541	24.0447
	rs147556975	T	C	T	C	-0.3012	-0.165067	0.039	FALSE	FALSE	FALSE	bY36VT	149076797	0.235908	0.139265	outcome	TRUE	reported	textfile	1.508e-06	5	148456360	3656	0.06251	TRUE	reported	igd	2	TRUE	0.00631038	23.2046	24.0447
	rs183466766	A	G	A	G	0.3121	0.0183457	0.0402	FALSE	FALSE	FALSE	bY36VT	108058383	0.87416	0.115835	outcome	TRUE	reported	textfile	2.14299e-07	13	108710731	3656	0.06005	TRUE	reported	igd	2	TRUE	0.00733429	26.9975	24.0447
	rs4702913	C	A	C	A	0.197	-0.0035347	0.9123	FALSE	FALSE	FALSE	bY36VT	4700474	0.910456	0.03143	outcome	TRUE	reported	textfile	3.07999e-06	5	4700587	3656	0.04215	TRUE	reported	igd	2	TRUE	0.00593942	21.8323	24.0447
	rs557577736	G	A	G	A	1.819	0.174798	0.001	FALSE	FALSE	FALSE	bY36VT	45649957	0.244948	0.150337	outcome	TRUE	reported	textfile	1.91898e-06	13	46224092	3656	0.3815	TRUE	reported	igd	2	TRUE	0.00617985	22.7216	24.0447
	rs7254039	A	G	A	G	-0.2566	0.029214	0.0435	FALSE	FALSE	FALSE	bY36VT	14882542	0.571787	0.0516677	outcome	TRUE	reported	textfile	8.81089e-06	19	14993354	3656	0.05765	TRUE	reported	igd	2	TRUE	0.00538966	19.8005	24.0447
	rs73192651	T	C	T	C	0.4428	0.0700385	0.02	FALSE	FALSE	FALSE	bY36VT	49638749	0.446182	0.0919388	outcome	TRUE	reported	textfile	4.05005e-07	13	50212885	3656	0.08724	TRUE	reported	igd	2	TRUE	0.00699726	25.7482	24.0447
	rs7586359	G	T	G	T	-0.1868	-0.0544103	0.8907	FALSE	FALSE	FALSE	bY36VT	236286776	0.080118	0.0310915	outcome	TRUE	reported	textfile	1.16899e-06	2	237195419	3656	0.03837	TRUE	reported	igd	2	TRUE	0.00644106	23.6882	24.0447
	rs77762131	C	G	C	G	0.291	0.137884	0.045	FALSE	TRUE	TRUE	bY36VT	95739501	0.3189	0.138337	outcome	TRUE	reported	textfile	3.22404e-07	14	96205838	3656	0.05685	TRUE	reported	igd	2	FALSE	0.0071157	26.1871	24.0447
	rs8014978	C	T	C	T	-0.1136	-0.0413941	0.5737	FALSE	FALSE	FALSE	bY36VT	94470627	0.0864789	0.0241467	outcome	TRUE	reported	textfile	3.565e-06	14	94936964	3656	0.02446	TRUE	reported	igd	2	TRUE	0.0058652	21.5579	24.0447
	rs880312	A	G	A	G	-0.1821	0.00927289	0.1034	FALSE	FALSE	FALSE	bY36VT	8869644	0.84143	0.0463493	outcome	TRUE	reported	textfile	4.67897e-06	16	8963501	3656	0.03971	TRUE	reported	igd	2	TRUE	0.00571904	21.0176	24.0447
	rs9314892	G	A	G	A	-0.1608	-0.0164719	0.8553	FALSE	FALSE	FALSE	bY36VT	114107893	0.546457	0.0273131	outcome	TRUE	reported	textfile	3.926e-06	13	114873368	3656	0.03478	TRUE	reported	igd	2	TRUE	0.00581266	21.3636	24.0447
	rs9614226	G	T	G	T	-0.4122	-0.0714569	0.9792	FALSE	FALSE	FALSE	bY36VT	44292270	0.375465	0.0806256	outcome	TRUE	reported	textfile	1.46501e-06	22	44688150	3656	0.08546	TRUE	reported	igd	2	TRUE	0.00632309	23.2516	24.0447
GCST90001413	rs111237501	C	T	C	T	1.055	0.0505847	0.003	FALSE	FALSE	FALSE	XZ7i98	163302911	0.599723	0.0963889	outcome	TRUE	reported	textfile	2.813e-06	1	163272701	3657	0.2248	TRUE	reported	igd	2	TRUE	0.00598659	22.0128	22.1279
	rs112898282	C	T	C	T	0.4712	-0.0668242	0.0152	FALSE	FALSE	FALSE	XZ7i98	28173255	0.388335	0.0774647	outcome	TRUE	reported	textfile	2.97201e-06	10	28462184	3657	0.1007	TRUE	reported	igd	2	TRUE	0.00595161	21.8834	22.1279
	rs114209430	C	T	C	T	-0.6384	0.173925	0.0085	FALSE	FALSE	FALSE	XZ7i98	82097246	0.124754	0.113297	outcome	TRUE	reported	textfile	2.75797e-06	4	83018399	3657	0.136	TRUE	reported	igd	2	TRUE	0.00598927	22.0227	22.1279
	rs115218594	A	G	A	G	-0.2776	-0.0951898	0.0421	FALSE	FALSE	FALSE	XZ7i98	27246727	0.033621	0.0448038	outcome	TRUE	reported	textfile	7.95591e-06	22	27642688	3657	0.06207	TRUE	reported	igd	2	TRUE	0.00543978	19.9912	22.1279
	rs11887461	G	A	T	G	0.1136	-0.276525	0.4754	TRUE	FALSE	FALSE	XZ7i98	127902673	0.155555	0.194711	outcome	TRUE	reported	textfile	5.25303e-06	2	128660247	3657	0.0249	TRUE	reported	igd	2	FALSE	0.00565937	20.8027	22.1279
	rs13020544	A	G	A	G	-2.752	-0.476736	0.0004	FALSE	FALSE	FALSE	XZ7i98	216944475	0.0321521	0.222513	outcome	TRUE	reported	textfile	1.287e-06	2	217809198	3657	0.5674	TRUE	reported	igd	2	TRUE	0.00639158	23.5115	22.1279
	rs142305616	C	A	C	A	0.466	0.0730872	0.0148	FALSE	FALSE	FALSE	XZ7i98	103479900	0.296611	0.0700251	outcome	TRUE	reported	textfile	8.83792e-06	14	103946237	3657	0.1047	TRUE	reported	igd	2	TRUE	0.00538775	19.7989	22.1279
	rs145137909	A	G	A	G	-2.77	0.0780313	0.0004	FALSE	FALSE	FALSE	XZ7i98	214753514	0.556988	0.13286	outcome	TRUE	reported	textfile	1.087e-06	2	215618238	3657	0.5672	TRUE	reported	igd	2	TRUE	0.00647946	23.8369	22.1279
	rs17044633	G	A	G	A	0.3561	-0.0412665	0.0286	FALSE	FALSE	FALSE	XZ7i98	112410492	0.784545	0.150938	outcome	TRUE	reported	textfile	2.256e-06	4	113331648	3657	0.07517	TRUE	reported	igd	2	TRUE	0.0060992	22.4294	22.1279
	rs183821560	A	G	A	G	-1.841	0.165171	0.0016	FALSE	FALSE	FALSE	XZ7i98	62776497	0.115107	0.104827	outcome	TRUE	reported	textfile	2.25102e-06	5	62072324	3657	0.3885	TRUE	reported	igd	2	TRUE	0.00610298	22.4434	22.1279
	rs35192093	T	C	T	C	0.1597	0.0305165	0.1593	FALSE	FALSE	FALSE	XZ7i98	31807404	0.348918	0.0325791	outcome	TRUE	reported	textfile	5.36402e-06	18	29387367	3657	0.03505	TRUE	reported	igd	2	TRUE	0.00564482	20.749	22.1279
	rs6073000	C	T	C	T	-0.3098	-0.000949056	0.959	FALSE	FALSE	FALSE	XZ7i98	43148809	0.983882	0.0469778	outcome	TRUE	reported	textfile	8.163e-07	20	41777449	3657	0.06272	TRUE	reported	igd	2	TRUE	0.00662732	24.3845	22.1279
	rs7198605	T	C	T	C	0.146	0.0212913	0.182	FALSE	FALSE	FALSE	XZ7i98	6057420	0.407252	0.0256912	outcome	TRUE	reported	textfile	5.38295e-06	16	6107421	3657	0.03204	TRUE	reported	igd	2	TRUE	0.00564595	20.7531	22.1279
	rs73045003	T	C	T	C	-0.1605	-0.0207965	0.1396	FALSE	FALSE	FALSE	XZ7i98	2612362	0.545158	0.0343726	outcome	TRUE	reported	textfile	9.03608e-06	7	2651996	3657	0.03611	TRUE	reported	igd	2	TRUE	0.00537317	19.745	22.1279
	rs76377003	G	A	G	A	-0.3971	-0.0953078	0.0219	FALSE	FALSE	FALSE	XZ7i98	111869599	0.304549	0.0928267	outcome	TRUE	reported	textfile	3.76296e-06	8	112881828	3657	0.08574	TRUE	reported	igd	2	TRUE	0.00583133	21.4385	22.1279
	rs7966251	A	G	A	G	0.1908	0.0186124	0.1349	FALSE	FALSE	FALSE	XZ7i98	103337617	0.480073	0.0263563	outcome	TRUE	reported	textfile	1.43199e-07	12	103731395	3657	0.03619	TRUE	reported	igd	2	TRUE	0.00754338	27.7806	22.1279
	rs8109503	A	T	A	T	-0.2029	0.00706054	0.0919	FALSE	TRUE	TRUE	XZ7i98	18962989	0.853826	0.0383227	outcome	TRUE	reported	textfile	4.27297e-06	19	19073798	3657	0.04406	TRUE	reported	igd	2	FALSE	0.00576553	21.1952	22.1279
	rs9398107	G	A	G	A	0.2678	0.0396065	0.0555	FALSE	FALSE	FALSE	XZ7i98	106707812	0.559911	0.0679387	outcome	TRUE	reported	textfile	1.274e-06	6	107155687	3657	0.0552	TRUE	reported	igd	2	TRUE	0.00639487	23.5237	22.1279
GCST90001414	rs111237501	C	T	C	T	1.052	0.0505847	0.003	FALSE	FALSE	FALSE	zUH8ZG	163302911	0.599723	0.0963889	outcome	TRUE	reported	textfile	3.34703e-06	1	163272701	3656	0.2261	TRUE	reported	igd	2	TRUE	0.00588654	21.6368	21.3427
	rs112898282	C	T	C	T	0.4601	-0.0668242	0.0152	FALSE	FALSE	FALSE	zUH8ZG	28173255	0.388335	0.0774647	outcome	TRUE	reported	textfile	6.27798e-06	10	28462184	3656	0.1017	TRUE	reported	igd	2	TRUE	0.00556714	20.4562	21.3427
	rs114114265	A	G	A	G	0.2343	0.0906135	0.0647	FALSE	FALSE	FALSE	zUH8ZG	79579586	0.311306	0.089496	outcome	TRUE	reported	textfile	5.50896e-06	2	79806712	3656	0.05149	TRUE	reported	igd	2	TRUE	0.0056317	20.6948	21.3427
	rs145638783	A	G	A	G	-0.9851	-0.0217303	0.0033	FALSE	FALSE	FALSE	zUH8ZG	1238207	0.800655	0.0860608	outcome	TRUE	reported	textfile	4.469e-06	6	1238442	3656	0.2144	TRUE	reported	igd	2	TRUE	0.00574122	21.0996	21.3427
	rs17044633	G	A	G	A	0.3458	-0.0412665	0.0286	FALSE	FALSE	FALSE	zUH8ZG	112410492	0.784545	0.150938	outcome	TRUE	reported	textfile	5.62406e-06	4	113331648	3656	0.07605	TRUE	reported	igd	2	TRUE	0.00562336	20.664	21.3427
	rs191543445	G	A	G	A	0.3337	-0.0465927	0.031	FALSE	FALSE	FALSE	zUH8ZG	31035932	0.54566	0.077105	outcome	TRUE	reported	textfile	4.14295e-06	14	31505138	3656	0.07236	TRUE	reported	igd	2	TRUE	0.00578349	21.2558	21.3427
	rs421516	A	C	A	C	-0.2921	-0.133276	0.9583	FALSE	FALSE	FALSE	zUH8ZG	65139471	0.546699	0.221126	outcome	TRUE	reported	textfile	4.54496e-06	17	63135589	3656	0.06361	TRUE	reported	igd	2	TRUE	0.00573467	21.0753	21.3427
	rs451367	C	T	C	T	-0.146	-0.00706194	0.7674	FALSE	FALSE	FALSE	zUH8ZG	16302031	0.835001	0.0339041	outcome	TRUE	reported	textfile	8.51805e-07	19	16412842	3656	0.0296	TRUE	reported	igd	2	TRUE	0.00661052	24.3156	21.3427
	rs4697616	A	G	A	G	0.1246	0.0339915	0.6779	FALSE	FALSE	FALSE	zUH8ZG	25765561	0.173504	0.0249748	outcome	TRUE	reported	textfile	3.53403e-06	4	25767183	3656	0.02682	TRUE	reported	igd	2	TRUE	0.00586889	21.5715	21.3427
	rs496760	A	G	A	G	0.1331	-0.0263313	0.6422	FALSE	FALSE	FALSE	zUH8ZG	54403488	0.264942	0.02362	outcome	TRUE	reported	textfile	5.69102e-07	15	54695686	3656	0.02656	TRUE	reported	igd	2	TRUE	0.00682214	25.0993	21.3427
	rs72953104	G	C	G	C	0.2344	-0.0230652	0.0643	FALSE	TRUE	TRUE	zUH8ZG	40913911	0.463294	0.0314483	outcome	TRUE	reported	textfile	4.19701e-06	1	41379583	3656	0.05087	TRUE	reported	igd	2	FALSE	0.00577392	21.2204	21.3427
	rs72977632	A	T	A	T	-0.2323	0.0237417	0.0643	FALSE	TRUE	TRUE	zUH8ZG	1930175	0.515373	0.036498	outcome	TRUE	reported	textfile	5.75294e-06	19	1930174	3656	0.05115	TRUE	reported	igd	2	FALSE	0.00560993	20.6143	21.3427
	rs74356874	A	G	A	G	0.6821	-0.120564	0.0066	FALSE	FALSE	FALSE	zUH8ZG	22936453	0.0972747	0.0727074	outcome	TRUE	reported	textfile	4.73598e-06	5	22936562	3656	0.1488	TRUE	reported	igd	2	TRUE	0.00571472	21.0016	21.3427
	rs75453701	G	A	G	A	0.2658	0.0602727	0.0464	FALSE	FALSE	FALSE	zUH8ZG	54655511	0.753621	0.192031	outcome	TRUE	reported	textfile	9.47305e-06	13	55229646	3656	0.05994	TRUE	reported	igd	2	TRUE	0.00534984	19.6535	21.3427
	rs7615875	C	T	C	T	0.1425	-0.0116181	0.1956	FALSE	FALSE	FALSE	zUH8ZG	29303920	0.66767	0.02706	outcome	TRUE	reported	textfile	8.8481e-06	3	29345411	3656	0.03201	TRUE	reported	igd	2	TRUE	0.00539144	19.8071	21.3427
	rs76225955	C	T	C	T	-0.1924	0.0645706	0.0909	FALSE	FALSE	FALSE	zUH8ZG	31592382	0.116996	0.0411932	outcome	TRUE	reported	textfile	8.65506e-06	4	31594004	3656	0.0432	TRUE	reported	igd	2	TRUE	0.00539618	19.8246	21.3427
	rs76499400	T	G	T	G	0.2069	-0.0244388	0.0792	FALSE	FALSE	FALSE	zUH8ZG	192170840	0.569208	0.042934	outcome	TRUE	reported	textfile	6.76893e-06	3	191888629	3656	0.04589	TRUE	reported	igd	2	TRUE	0.00552931	20.3164	21.3427
	rs7982713	G	A	G	A	-0.1482	-0.0376702	0.2157	FALSE	FALSE	FALSE	zUH8ZG	70802190	0.15175	0.0262808	outcome	TRUE	reported	textfile	1.068e-06	13	71376322	3656	0.03033	TRUE	reported	igd	2	TRUE	0.00648811	23.8624	21.3427
GCST90001415	rs11184230	T	C	T	C	-0.1946	-0.0413746	0.1095	FALSE	FALSE	FALSE	iwaPsx	104617102	0.328768	0.042366	outcome	TRUE	reported	textfile	1.083e-06	1	105159724	3657	0.03983	TRUE	reported	igd	2	TRUE	0.00648507	23.8576	22.0185
	rs116844769	A	G	A	G	-0.2773	-0.117798	0.0662	FALSE	FALSE	FALSE	iwaPsx	65247177	0.0753217	0.0662347	outcome	TRUE	reported	textfile	7.29693e-08	14	65713895	3657	0.0514	TRUE	reported	igd	2	TRUE	0.00789597	29.0895	22.0185
	rs12465275	C	T	C	T	-0.6051	-0.0168623	0.009	FALSE	FALSE	FALSE	iwaPsx	4034677	0.786419	0.0622308	outcome	TRUE	reported	textfile	8.84199e-06	2	4082267	3657	0.136	TRUE	reported	igd	2	TRUE	0.00538402	19.7851	22.0185
	rs140191306	T	C	T	C	0.4404	0.32811	0.0179	FALSE	FALSE	FALSE	iwaPsx	2570753	0.0332751	0.154133	outcome	TRUE	reported	textfile	3.804e-06	9	2570753	3657	0.09513	TRUE	reported	igd	2	TRUE	0.00582635	21.4201	22.0185
	rs145123647	T	C	T	C	1.016	-0.185798	0.003	FALSE	FALSE	FALSE	iwaPsx	26670665	0.00429566	0.0650645	outcome	TRUE	reported	textfile	7.67892e-06	10	26959594	3657	0.2269	TRUE	reported	igd	2	TRUE	0.00545279	20.0392	22.0185
	rs182854545	T	C	T	C	1.363	0.0452506	0.0018	FALSE	FALSE	FALSE	iwaPsx	53549505	0.306426	0.044244	outcome	TRUE	reported	textfile	5.84602e-06	14	54016223	3657	0.3003	TRUE	reported	igd	2	TRUE	0.00560166	20.5894	22.0185
	rs1972883	A	G	A	G	-0.1408	0.00693307	0.7849	FALSE	FALSE	FALSE	iwaPsx	47949928	0.84497	0.0354561	outcome	TRUE	reported	textfile	6.88906e-06	4	47951945	3657	0.03125	TRUE	reported	igd	2	TRUE	0.00552047	20.2893	22.0185
	rs2450220	T	C	T	C	-0.1439	0.0362326	0.816	FALSE	FALSE	FALSE	iwaPsx	118311162	0.451678	0.048142	outcome	TRUE	reported	textfile	8.69201e-06	8	119323401	3657	0.03231	TRUE	reported	igd	2	TRUE	0.00539478	19.8249	22.0185
	rs35698683	G	A	G	A	0.2735	-0.0563869	0.0447	FALSE	FALSE	FALSE	iwaPsx	11588619	0.263526	0.0504312	outcome	TRUE	reported	textfile	5.36402e-06	4	11590243	3657	0.06003	TRUE	reported	igd	2	TRUE	0.0056441	20.7463	22.0185
	rs45608038	G	A	G	A	-0.2927	-0.0687024	0.0421	FALSE	FALSE	FALSE	iwaPsx	73451886	0.26876	0.0621222	outcome	TRUE	reported	textfile	3.85496e-06	2	73679013	3657	0.06326	TRUE	reported	igd	2	TRUE	0.00582006	21.3968	22.0185
	rs56335940	A	G	A	G	-0.1728	0.0280969	0.1326	FALSE	FALSE	FALSE	iwaPsx	106860968	0.339404	0.0294103	outcome	TRUE	reported	textfile	4.83905e-06	3	106579815	3657	0.03773	TRUE	reported	igd	2	TRUE	0.00570302	20.9641	22.0185
	rs58706313	T	C	T	C	-0.3021	0.0283969	0.0343	FALSE	FALSE	FALSE	iwaPsx	44096682	0.462941	0.0386872	outcome	TRUE	reported	textfile	7.53095e-06	22	44492562	3657	0.06737	TRUE	reported	igd	2	TRUE	0.00546842	20.097	22.0185
	rs6910508	A	G	A	G	0.1159	0.00820825	0.4199	FALSE	FALSE	FALSE	iwaPsx	166117857	0.749456	0.0257024	outcome	TRUE	reported	textfile	5.71202e-06	6	166531345	3657	0.0255	TRUE	reported	igd	2	TRUE	0.00561714	20.6466	22.0185
	rs73426855	C	T	C	T	-0.1632	0.0196318	0.1471	FALSE	FALSE	FALSE	iwaPsx	79663261	0.492725	0.0286186	outcome	TRUE	reported	textfile	4.13904e-06	17	77637123	3657	0.03539	TRUE	reported	igd	2	TRUE	0.00578144	21.254	22.0185
	rs7412746	T	C	T	C	0.1263	0.031981	0.5153	FALSE	FALSE	FALSE	iwaPsx	150887995	0.177187	0.023699	outcome	TRUE	reported	textfile	1.11199e-06	1	150860471	3657	0.02588	TRUE	reported	igd	2	TRUE	0.00647044	23.8035	22.0185
	rs75766272	T	C	T	C	0.483	-0.0296118	0.0201	FALSE	FALSE	FALSE	iwaPsx	7949925	0.521078	0.046147	outcome	TRUE	reported	textfile	3.86002e-08	1	8009985	3657	0.08768	TRUE	reported	igd	2	TRUE	0.00822961	30.3288	22.0185
	rs7870388	G	C	G	C	-0.142	-0.00173021	0.7737	FALSE	TRUE	TRUE	iwaPsx	8660693	0.952291	0.0289187	outcome	TRUE	reported	textfile	2.97303e-06	9	8660693	3657	0.03034	TRUE	reported	igd	2	FALSE	0.00595425	21.8931	22.0185
	rs78958229	T	C	T	C	0.2723	-0.0942263	0.044	FALSE	FALSE	FALSE	iwaPsx	37991655	0.501281	0.140118	outcome	TRUE	reported	textfile	6.74295e-06	21	39363957	3657	0.06041	TRUE	reported	igd	2	TRUE	0.00552518	20.3067	22.0185
GCST90001416	rs115150472	T	C	T	C	2.619	-0.0755266	0.0004	FALSE	FALSE	FALSE	pWu0QK	146759225	0.304257	0.073516	outcome	TRUE	reported	textfile	5.73099e-06	5	146138788	3656	0.5765	TRUE	reported	igd	2	TRUE	0.00561334	20.6269	21.8661
	rs117190494	A	G	A	G	0.4148	-0.0154465	0.022	FALSE	FALSE	FALSE	pWu0QK	74651104	0.863997	0.090178	outcome	TRUE	reported	textfile	3.642e-07	8	75563339	3656	0.08139	TRUE	reported	igd	2	TRUE	0.00705431	25.9596	21.8661
	rs12197153	A	G	A	G	2.118	0.0341528	0.0007	FALSE	FALSE	FALSE	pWu0QK	100373584	0.414812	0.0418819	outcome	TRUE	reported	textfile	2.63099e-06	6	100821460	3656	0.4501	TRUE	reported	igd	2	TRUE	0.00602012	22.1308	21.8661
	rs12799241	A	G	A	G	0.132	0.0593951	0.2619	FALSE	FALSE	FALSE	pWu0QK	120110021	0.0495656	0.0302467	outcome	TRUE	reported	textfile	2.391e-06	11	119980729	3656	0.02794	TRUE	reported	igd	2	TRUE	0.006068	22.3078	21.8661
	rs141108367	A	G	A	G	1.503	0.020142	0.0012	FALSE	FALSE	FALSE	pWu0QK	21916697	0.768143	0.0683233	outcome	TRUE	reported	textfile	5.30506e-06	5	21916806	3656	0.3297	TRUE	reported	igd	2	TRUE	0.00565213	20.7703	21.8661
	rs143176410	C	G	C	G	1.816	-0.320961	0.001	FALSE	TRUE	TRUE	pWu0QK	84271633	0.027867	0.145947	outcome	TRUE	reported	textfile	7.18208e-06	16	84305239	3656	0.404	TRUE	reported	igd	2	FALSE	0.00549628	20.1944	21.8661
	rs143397127	C	T	C	T	-0.4464	0.269617	0.0157	FALSE	FALSE	FALSE	pWu0QK	12807766	0.403168	0.322517	outcome	TRUE	reported	textfile	6.50999e-06	7	12847391	3656	0.09885	TRUE	reported	igd	2	TRUE	0.00554719	20.3825	21.8661
	rs150663332	T	C	T	C	-0.2005	0.0396887	0.084	FALSE	FALSE	FALSE	pWu0QK	2097003	0.340198	0.0416122	outcome	TRUE	reported	textfile	5.02597e-06	8	2044843	3656	0.04387	TRUE	reported	igd	2	TRUE	0.00568085	20.8764	21.8661
	rs17056318	C	T	C	T	-0.2103	-0.00417479	0.081	FALSE	FALSE	FALSE	pWu0QK	158858945	0.935471	0.0515637	outcome	TRUE	reported	textfile	3.98602e-06	5	158285953	3656	0.04553	TRUE	reported	igd	2	TRUE	0.00580163	21.3229	21.8661
	rs189761842	T	C	T	C	0.7675	-0.0333735	0.0055	FALSE	FALSE	FALSE	pWu0QK	123725829	0.666627	0.0774721	outcome	TRUE	reported	textfile	6.72404e-06	10	125485345	3656	0.1702	TRUE	reported	igd	2	TRUE	0.00553124	20.3236	21.8661
	rs190448231	G	T	G	T	0.3363	-0.018266	0.028	FALSE	FALSE	FALSE	pWu0QK	88239228	0.885472	0.126815	outcome	TRUE	reported	textfile	8.64908e-06	7	87868543	3656	0.07548	TRUE	reported	igd	2	TRUE	0.00540048	19.8405	21.8661
	rs2395904	G	T	G	T	-0.1335	0.000463352	0.2657	FALSE	FALSE	FALSE	pWu0QK	129605573	0.986168	0.026727	outcome	TRUE	reported	textfile	1.26e-06	8	130617819	3656	0.0275	TRUE	reported	igd	2	TRUE	0.00640472	23.5537	21.8661
	rs34764986	C	T	C	T	-0.2158	-0.120795	0.0699	FALSE	FALSE	FALSE	pWu0QK	61351498	0.0877971	0.0707587	outcome	TRUE	reported	textfile	6.69607e-06	20	59926554	3656	0.04786	TRUE	reported	igd	2	TRUE	0.00553023	20.3198	21.8661
	rs34771848	T	C	T	C	-0.3693	-0.0154075	0.023	FALSE	FALSE	FALSE	pWu0QK	14149645	0.706124	0.0408615	outcome	TRUE	reported	textfile	4.43598e-06	12	14302579	3656	0.08033	TRUE	reported	igd	2	TRUE	0.00574769	21.1235	21.8661
	rs34910780	T	A	T	A	-0.2677	0.128797	0.048	FALSE	TRUE	TRUE	pWu0QK	77840371	0.174448	0.0948398	outcome	TRUE	reported	textfile	2.94198e-06	7	77469688	3656	0.05716	TRUE	reported	igd	2	FALSE	0.0059636	21.9217	21.8661
	rs3811215	T	G	T	G	-0.1264	0.0123089	0.3032	FALSE	FALSE	FALSE	pWu0QK	22485789	0.693646	0.031248	outcome	TRUE	reported	textfile	2.59801e-06	14	22954777	3656	0.02685	TRUE	reported	igd	2	TRUE	0.00602525	22.1497	21.8661
	rs62067029	T	A	T	A	-0.1593	-0.0304785	0.4148	FALSE	TRUE	TRUE	pWu0QK	39882138	0.195056	0.0235216	outcome	TRUE	reported	textfile	2.61198e-08	17	38038391	3656	0.02856	TRUE	reported	igd	2	FALSE	0.00843779	31.0941	21.8661
	rs701839	G	A	G	A	0.1269	-0.0524575	0.7124	FALSE	FALSE	FALSE	pWu0QK	101195537	0.0371843	0.0251748	outcome	TRUE	reported	textfile	5.63106e-06	10	102955294	3656	0.02791	TRUE	reported	igd	2	TRUE	0.00562275	20.6617	21.8661
	rs71615254	C	A	C	A	-0.2989	-0.00417705	0.0406	FALSE	FALSE	FALSE	pWu0QK	177737259	0.923987	0.0437788	outcome	TRUE	reported	textfile	1.21099e-06	4	178658413	3656	0.06147	TRUE	reported	igd	2	TRUE	0.00642569	23.6313	21.8661
	rs73426855	C	T	C	T	-0.1616	0.0196318	0.1469	FALSE	FALSE	FALSE	pWu0QK	79663261	0.492725	0.0286186	outcome	TRUE	reported	textfile	3.09699e-06	17	77637123	3656	0.03458	TRUE	reported	igd	2	TRUE	0.005938	21.8271	21.8661
	rs75474045	A	G	A	G	0.4915	-0.179957	0.0126	FALSE	FALSE	FALSE	pWu0QK	71854164	0.0298992	0.0828753	outcome	TRUE	reported	textfile	6.24899e-06	13	72428296	3656	0.1086	TRUE	reported	igd	2	TRUE	0.00557128	20.4715	21.8661
	rs76578043	A	G	A	G	0.3166	-0.0620685	0.0298	FALSE	FALSE	FALSE	pWu0QK	104562459	0.420749	0.0770919	outcome	TRUE	reported	textfile	5.73905e-06	13	105214810	3656	0.0697	TRUE	reported	igd	2	TRUE	0.00561185	20.6214	21.8661
	rs77983244	A	G	A	G	-0.3049	0.01303	0.0325	FALSE	FALSE	FALSE	pWu0QK	7412708	0.759642	0.0425883	outcome	TRUE	reported	textfile	5.22902e-06	17	7316027	3656	0.06682	TRUE	reported	igd	2	TRUE	0.00566278	20.8096	21.8661
GCST90001417	rs10505439	T	C	T	C	-0.1852	-0.0173012	0.0941	FALSE	FALSE	FALSE	aQT0Y8	123649864	0.707714	0.0461454	outcome	TRUE	reported	textfile	9.38102e-06	8	124662104	3657	0.04175	TRUE	reported	igd	2	TRUE	0.00535197	19.6667	22.6333
	rs10743163	A	G	A	G	-0.1205	-0.00798975	0.4035	FALSE	FALSE	FALSE	aQT0Y8	11012403	0.755802	0.0256906	outcome	TRUE	reported	textfile	2.20699e-06	11	11033950	3657	0.02541	TRUE	reported	igd	2	TRUE	0.00611191	22.4764	22.6333
	rs112294465	A	C	A	C	1.249	0.11398	0.0021	FALSE	FALSE	FALSE	aQT0Y8	123259535	0.219403	0.0928085	outcome	TRUE	reported	textfile	7.44098e-06	12	123744082	3657	0.2784	TRUE	reported	igd	2	TRUE	0.00547366	20.1163	22.6333
	rs115405874	G	A	G	A	0.9325	-0.125356	0.0037	FALSE	FALSE	FALSE	aQT0Y8	120407121	0.0164441	0.0522555	outcome	TRUE	reported	textfile	3.925e-06	5	119742816	3657	0.2017	TRUE	reported	igd	2	TRUE	0.00581072	21.3623	22.6333
	rs116844769	A	G	A	G	0.2482	-0.117798	0.0662	FALSE	FALSE	FALSE	aQT0Y8	65247177	0.0753217	0.0662347	outcome	TRUE	reported	textfile	1.064e-06	14	65713895	3657	0.05078	TRUE	reported	igd	2	TRUE	0.00649031	23.877	22.6333
	rs117004076	G	A	G	A	0.4553	-0.0457437	0.0146	FALSE	FALSE	FALSE	aQT0Y8	97235889	0.491245	0.0664561	outcome	TRUE	reported	textfile	8.56091e-06	14	97702226	3657	0.1022	TRUE	reported	igd	2	TRUE	0.00539781	19.8361	22.6333
	rs145208372	A	G	A	G	-0.56	0.0266559	0.0097	FALSE	FALSE	FALSE	aQT0Y8	83212995	0.630379	0.0553954	outcome	TRUE	reported	textfile	5.91003e-06	1	83678678	3657	0.1234	TRUE	reported	igd	2	TRUE	0.00559992	20.583	22.6333
	rs145442262	A	G	A	G	-0.2083	-0.0753517	0.0906	FALSE	FALSE	FALSE	aQT0Y8	186985081	0.261598	0.0671212	outcome	TRUE	reported	textfile	1.15001e-06	3	186702869	3657	0.04276	TRUE	reported	igd	2	TRUE	0.00644717	23.7173	22.6333
	rs148702078	C	G	C	G	0.9264	-0.0286275	0.0034	FALSE	TRUE	TRUE	aQT0Y8	100127016	0.628696	0.0592012	outcome	TRUE	reported	textfile	7.59906e-06	6	100574892	3657	0.2067	TRUE	reported	igd	2	FALSE	0.00546276	20.0761	22.6333
	rs265612	T	C	T	C	0.1143	-0.0333594	0.3411	FALSE	FALSE	FALSE	aQT0Y8	129628187	0.175902	0.0246471	outcome	TRUE	reported	textfile	9.29608e-06	12	130112732	3657	0.02575	TRUE	reported	igd	2	TRUE	0.00535895	19.6925	22.6333
	rs35698683	G	A	G	A	-0.293	-0.0563869	0.0447	FALSE	FALSE	FALSE	aQT0Y8	11588619	0.263526	0.0504312	outcome	TRUE	reported	textfile	8.17504e-07	4	11590243	3657	0.05931	TRUE	reported	igd	2	TRUE	0.00662927	24.3917	22.6333
	rs45608038	G	A	G	A	0.3527	-0.0687024	0.0421	FALSE	FALSE	FALSE	aQT0Y8	73451886	0.26876	0.0621222	outcome	TRUE	reported	textfile	1.71002e-08	2	73679013	3657	0.0624	TRUE	reported	igd	2	TRUE	0.00866043	31.9304	22.6333
	rs4658141	C	T	C	T	-0.1269	-0.0236967	0.3805	FALSE	FALSE	FALSE	aQT0Y8	89348383	0.334405	0.0245491	outcome	TRUE	reported	textfile	1.009e-06	1	89814066	3657	0.02592	TRUE	reported	igd	2	TRUE	0.00651165	23.9561	22.6333
	rs55710170	A	G	A	G	-0.1708	0.0335099	0.1181	FALSE	FALSE	FALSE	aQT0Y8	16374638	0.406114	0.0403369	outcome	TRUE	reported	textfile	6.70595e-06	3	16416145	3657	0.03788	TRUE	reported	igd	2	TRUE	0.0055287	20.3197	22.6333
	rs62233948	T	C	T	C	-0.737	-0.0586721	0.006	FALSE	FALSE	FALSE	aQT0Y8	7789940	0.498953	0.0867754	outcome	TRUE	reported	textfile	7.48101e-06	3	7831627	3657	0.1643	TRUE	reported	igd	2	TRUE	0.00547207	20.1105	22.6333
	rs62459310	C	G	C	G	0.3676	0.0754624	0.022	FALSE	TRUE	TRUE	aQT0Y8	56174489	0.281903	0.0701287	outcome	TRUE	reported	textfile	6.15205e-06	7	56242182	3657	0.08119	TRUE	reported	igd	2	FALSE	0.00557434	20.4884	22.6333
	rs681014	C	T	C	T	0.9614	0.135388	0.9966	FALSE	FALSE	FALSE	aQT0Y8	141256755	0.315571	0.134903	outcome	TRUE	reported	textfile	3.52298e-06	5	140636323	3657	0.207	TRUE	reported	igd	2	TRUE	0.00586393	21.5591	22.6333
	rs7221794	A	G	A	G	-0.1563	0.00931787	0.1574	FALSE	FALSE	FALSE	aQT0Y8	78983647	0.74423	0.0285599	outcome	TRUE	reported	textfile	4.29903e-06	17	76979729	3657	0.03395	TRUE	reported	igd	2	TRUE	0.0057624	21.1837	22.6333
	rs72758947	G	A	G	A	-0.2365	0.0470866	0.0641	FALSE	FALSE	FALSE	aQT0Y8	206913708	0.181637	0.0352516	outcome	TRUE	reported	textfile	3.67401e-06	1	207087053	3657	0.05101	TRUE	reported	igd	2	TRUE	0.00584361	21.4839	22.6333
	rs72844588	A	G	A	G	0.2066	-0.0432547	0.0913	FALSE	FALSE	FALSE	aQT0Y8	137662584	0.18981	0.0329901	outcome	TRUE	reported	textfile	1.826e-06	2	138420154	3657	0.04322	TRUE	reported	igd	2	TRUE	0.00620956	22.8378	22.6333
	rs72944931	G	A	G	A	0.4657	-0.135851	0.0138	FALSE	FALSE	FALSE	aQT0Y8	177251534	0.277352	0.12506	outcome	TRUE	reported	textfile	9.91791e-06	2	178116262	3657	0.1052	TRUE	reported	igd	2	TRUE	0.0053301	19.5859	22.6333
	rs7412746	T	C	T	C	-0.1301	0.031981	0.5153	FALSE	FALSE	FALSE	aQT0Y8	150887995	0.177187	0.023699	outcome	TRUE	reported	textfile	3.41099e-07	1	150860471	3657	0.02547	TRUE	reported	igd	2	TRUE	0.00708409	26.0771	22.6333
	rs75766272	T	C	T	C	-0.4865	-0.0296118	0.0201	FALSE	FALSE	FALSE	aQT0Y8	7949925	0.521078	0.046147	outcome	TRUE	reported	textfile	2.04899e-08	1	8009985	3657	0.08656	TRUE	reported	igd	2	TRUE	0.00856389	31.5714	22.6333
	rs76477280	G	A	G	A	0.4892	0.0586175	0.0206	FALSE	FALSE	FALSE	aQT0Y8	49573044	0.523181	0.0918122	outcome	TRUE	reported	textfile	3.02803e-08	13	50147180	3657	0.08811	TRUE	reported	igd	2	TRUE	0.00835896	30.8095	22.6333
	rs77762131	C	G	C	G	0.2675	0.137884	0.045	FALSE	TRUE	TRUE	aQT0Y8	95739501	0.3189	0.138337	outcome	TRUE	reported	textfile	4.59896e-06	14	96205838	3657	0.05828	TRUE	reported	igd	2	FALSE	0.00572781	21.0558	22.6333
	rs9492229	C	T	C	T	0.2715	0.0182626	0.9556	FALSE	FALSE	FALSE	aQT0Y8	129088507	0.806642	0.0746141	outcome	TRUE	reported	textfile	9.27705e-06	6	129409652	3657	0.06115	TRUE	reported	igd	2	TRUE	0.00536151	19.7019	22.6333
GCST90001418	rs10759006	C	T	C	T	0.1133	0.0286745	0.6198	FALSE	FALSE	FALSE	s6kyn6	8855603	0.248492	0.0248475	outcome	TRUE	reported	textfile	9.50692e-06	9	8855603	3656	0.02556	TRUE	reported	igd	2	TRUE	0.00534569	19.6381	22.255
	rs10762541	T	C	T	C	0.1488	-0.00540524	0.772	FALSE	FALSE	FALSE	s6kyn6	52030701	0.830475	0.0252472	outcome	TRUE	reported	textfile	6.08695e-07	10	53790461	3656	0.02978	TRUE	reported	igd	2	TRUE	0.00678258	24.9528	22.255
	rs10942726	G	A	G	A	0.1188	0.0219064	0.3155	FALSE	FALSE	FALSE	s6kyn6	74962160	0.387236	0.0253358	outcome	TRUE	reported	textfile	8.92504e-06	5	74257985	3656	0.02672	TRUE	reported	igd	2	TRUE	0.00537789	19.7571	22.255
	rs11649808	A	G	A	G	0.1546	0.0462681	0.8487	FALSE	FALSE	FALSE	s6kyn6	64181305	0.0624727	0.0248362	outcome	TRUE	reported	textfile	8.74802e-06	17	62258665	3656	0.03472	TRUE	reported	igd	2	TRUE	0.00539392	19.8163	22.255
	rs11653761	T	G	T	G	-0.118	-0.00132543	0.592	FALSE	FALSE	FALSE	s6kyn6	2813241	0.955996	0.0240208	outcome	TRUE	reported	textfile	1.84001e-06	17	2716535	3656	0.0247	TRUE	reported	igd	2	TRUE	0.00620385	22.8104	22.255
	rs118092259	G	T	G	T	-0.2901	0.201697	0.0414	FALSE	FALSE	FALSE	s6kyn6	88420490	0.140211	0.136743	outcome	TRUE	reported	textfile	4.97898e-06	8	89432719	3656	0.06345	TRUE	reported	igd	2	TRUE	0.00568525	20.8927	22.255
	rs12874404	G	A	G	A	0.1691	-0.0269776	0.3256	FALSE	FALSE	FALSE	s6kyn6	108341146	0.67766	0.0649035	outcome	TRUE	reported	textfile	2.04202e-10	13	108993494	3656	0.02653	TRUE	reported	igd	2	TRUE	0.0109902	40.6046	22.255
	rs138329462	A	G	A	G	-0.4374	-0.115017	0.0174	FALSE	FALSE	FALSE	s6kyn6	11481426	0.2334	0.0965197	outcome	TRUE	reported	textfile	3.10799e-06	12	11634360	3656	0.09365	TRUE	reported	igd	2	TRUE	0.00593133	21.8024	22.255
	rs144295598	A	G	A	G	0.5664	0.0866662	0.0103	FALSE	FALSE	FALSE	s6kyn6	44768291	0.491261	0.125912	outcome	TRUE	reported	textfile	2.59902e-06	22	45164171	3656	0.1203	TRUE	reported	igd	2	TRUE	0.00602676	22.1553	22.255
	rs144625305	T	C	T	C	0.6162	-0.111705	0.0086	FALSE	FALSE	FALSE	s6kyn6	7832045	0.268912	0.101038	outcome	TRUE	reported	textfile	5.74804e-06	7	7871676	3656	0.1357	TRUE	reported	igd	2	TRUE	0.00560835	20.6085	22.255
	rs149085540	T	C	T	C	-0.4318	-0.195962	0.0167	FALSE	FALSE	FALSE	s6kyn6	109629467	0.43837	0.252871	outcome	TRUE	reported	textfile	6.66807e-06	4	110550623	3656	0.09574	TRUE	reported	igd	2	TRUE	0.00553302	20.3302	22.255
	rs16867231	A	G	A	G	0.5129	-0.0321788	0.0108	FALSE	FALSE	FALSE	s6kyn6	180185296	0.667275	0.0748534	outcome	TRUE	reported	textfile	8.98008e-06	2	181050023	3656	0.1154	TRUE	reported	igd	2	TRUE	0.00537412	19.7431	22.255
	rs17708396	A	C	A	C	2.539	0.0509032	0.0005	FALSE	FALSE	FALSE	s6kyn6	149030687	0.302661	0.0493849	outcome	TRUE	reported	textfile	1.09499e-06	5	148410250	3656	0.5201	TRUE	reported	igd	2	TRUE	0.00647625	23.8185	22.255
	rs184496770	T	C	T	C	1.162	0.00394889	0.0021	FALSE	FALSE	FALSE	s6kyn6	123243342	0.990911	0.34665	outcome	TRUE	reported	textfile	8.56091e-06	8	124255582	3656	0.2608	TRUE	reported	igd	2	TRUE	0.00540056	19.8408	22.255
	rs35057381	C	T	C	T	0.1344	0.0210265	0.2211	FALSE	FALSE	FALSE	s6kyn6	26412192	0.404225	0.0252086	outcome	TRUE	reported	textfile	6.17703e-06	5	26412301	3656	0.02969	TRUE	reported	igd	2	TRUE	0.00557371	20.4805	22.255
	rs4076316	A	T	A	T	-0.1404	0.0112908	0.3005	FALSE	TRUE	TRUE	s6kyn6	167447406	0.642084	0.0242923	outcome	TRUE	reported	textfile	2.83798e-07	6	167859623	3656	0.02729	TRUE	reported	igd	2	FALSE	0.00718767	26.4539	22.255
	rs557577736	G	A	G	A	1.818	0.174798	0.001	FALSE	FALSE	FALSE	s6kyn6	45649957	0.244948	0.150337	outcome	TRUE	reported	textfile	2.869e-06	13	46224092	3656	0.3878	TRUE	reported	igd	2	TRUE	0.00597535	21.9652	22.255
	rs56033406	T	C	T	C	0.312	-0.121485	0.0349	FALSE	FALSE	FALSE	s6kyn6	41117001	0.101556	0.074196	outcome	TRUE	reported	textfile	3.22901e-06	6	41084740	3656	0.06692	TRUE	reported	igd	2	TRUE	0.0059104	21.725	22.255
	rs7254039	A	G	A	G	-0.2606	0.029214	0.0435	FALSE	FALSE	FALSE	s6kyn6	14882542	0.571787	0.0516677	outcome	TRUE	reported	textfile	8.63794e-06	19	14993354	3656	0.0585	TRUE	reported	igd	2	TRUE	0.00539859	19.8335	22.255
	rs728776	G	A	G	A	-0.1712	-0.00900155	0.121	FALSE	FALSE	FALSE	s6kyn6	45004235	0.834072	0.0429705	outcome	TRUE	reported	textfile	7.09006e-06	22	45400116	3656	0.03808	TRUE	reported	igd	2	TRUE	0.00549811	20.2011	22.255
	rs73192651	T	C	T	C	0.4411	0.0700385	0.02	FALSE	FALSE	FALSE	s6kyn6	49638749	0.446182	0.0919388	outcome	TRUE	reported	textfile	7.38193e-07	13	50212885	3656	0.08893	TRUE	reported	igd	2	TRUE	0.00668434	24.5889	22.255
	rs75766272	T	C	T	C	-0.4055	-0.0296118	0.0201	FALSE	FALSE	FALSE	s6kyn6	7949925	0.521078	0.046147	outcome	TRUE	reported	textfile	2.56998e-06	1	8009985	3656	0.08609	TRUE	reported	igd	2	TRUE	0.00603174	22.1737	22.255
	rs7640784	A	C	A	C	-0.1111	-0.0469394	0.4714	FALSE	FALSE	FALSE	s6kyn6	176311710	0.0679485	0.0257154	outcome	TRUE	reported	textfile	7.47894e-06	3	176029498	3656	0.02476	TRUE	reported	igd	2	TRUE	0.00547691	20.1228	22.255
	rs76552872	T	G	T	G	0.283	0.0382263	0.042	FALSE	FALSE	FALSE	s6kyn6	69593184	0.810864	0.159735	outcome	TRUE	reported	textfile	5.54102e-06	13	70167316	3656	0.06219	TRUE	reported	igd	2	TRUE	0.00563213	20.6964	22.255
	rs77762131	C	G	C	G	0.2815	0.137884	0.045	FALSE	TRUE	TRUE	s6kyn6	95739501	0.3189	0.138337	outcome	TRUE	reported	textfile	1.12699e-06	14	96205838	3656	0.05774	TRUE	reported	igd	2	FALSE	0.00645926	23.7556	22.255
	rs79207264	A	G	A	G	0.1752	0.0229815	0.1184	FALSE	FALSE	FALSE	s6kyn6	96687564	0.685215	0.0566945	outcome	TRUE	reported	textfile	8.46603e-06	3	96406408	3656	0.0393	TRUE	reported	igd	2	TRUE	0.00540658	19.863	22.255
GCST90001419	rs111761453	T	G	T	G	0.2453	0.0268786	0.0524	FALSE	FALSE	FALSE	5hmd9b	137488920	0.677476	0.0646261	outcome	TRUE	reported	textfile	8.59904e-06	7	137173666	3658	0.05506	TRUE	reported	igd	2	TRUE	0.00539671	19.8374	21.4235
	rs112180455	T	C	T	C	0.3316	0.0537534	0.0299	FALSE	FALSE	FALSE	5hmd9b	220602137	0.409223	0.065135	outcome	TRUE	reported	textfile	6.19598e-06	2	221466858	3658	0.07326	TRUE	reported	igd	2	TRUE	0.00556962	20.4766	21.4235
	rs118084343	G	A	G	A	-0.2663	0.110661	0.0547	FALSE	FALSE	FALSE	5hmd9b	17666290	0.208004	0.0878904	outcome	TRUE	reported	textfile	1.02901e-06	11	17687837	3658	0.0544	TRUE	reported	igd	2	TRUE	0.00650826	23.9501	21.4235
	rs140134875	A	C	A	C	-1.694	0.00115689	0.0011	FALSE	FALSE	FALSE	5hmd9b	80013778	0.987203	0.0721287	outcome	TRUE	reported	textfile	1.639e-06	15	80306120	3658	0.3528	TRUE	reported	igd	2	TRUE	0.00626322	23.0426	21.4235
	rs187723151	A	G	A	G	-0.9447	-0.205726	0.004	FALSE	FALSE	FALSE	5hmd9b	242022917	0.250779	0.179132	outcome	TRUE	reported	textfile	1.07999e-06	1	242186219	3658	0.1934	TRUE	reported	igd	2	TRUE	0.00648049	23.8472	21.4235
	rs2107459	A	C	A	C	0.2021	0.055901	0.0853	FALSE	FALSE	FALSE	5hmd9b	74106214	0.247659	0.048355	outcome	TRUE	reported	textfile	4.17503e-06	16	74140113	3658	0.04383	TRUE	reported	igd	2	TRUE	0.00577869	21.2497	21.4235
	rs316122	C	G	C	G	0.2993	-0.045806	0.0372	FALSE	TRUE	TRUE	5hmd9b	93678365	0.27081	0.0415965	outcome	TRUE	reported	textfile	3.971e-06	5	93014071	3658	0.06479	TRUE	reported	igd	2	FALSE	0.00579999	21.3285	21.4235
	rs3885787	C	A	C	A	0.2407	-0.0966437	0.9422	FALSE	FALSE	FALSE	5hmd9b	91982172	0.07817	0.0548674	outcome	TRUE	reported	textfile	5.84494e-06	12	92375948	3658	0.05303	TRUE	reported	igd	2	TRUE	0.00560049	20.5907	21.4235
	rs4244568	G	T	G	T	-0.1233	0.0429369	0.3414	FALSE	FALSE	FALSE	5hmd9b	39027714	0.0708794	0.0237712	outcome	TRUE	reported	textfile	2.67399e-06	15	39319915	3658	0.02622	TRUE	reported	igd	2	TRUE	0.00600896	22.1016	21.4235
	rs4889373	G	A	G	A	-0.1372	0.109915	0.7989	FALSE	FALSE	FALSE	5hmd9b	81713997	9.37605e-05	0.0281386	outcome	TRUE	reported	textfile	7.06399e-06	16	81747602	3658	0.03051	TRUE	reported	igd	2	TRUE	0.00549776	20.2109	21.4235
	rs57840701	C	A	C	A	0.4562	0.0263605	0.015	FALSE	FALSE	FALSE	5hmd9b	48057694	0.482942	0.0375732	outcome	TRUE	reported	textfile	5.65002e-06	20	46686437	3658	0.1004	TRUE	reported	igd	2	TRUE	0.00561248	20.6351	21.4235
	rs58352426	A	G	A	G	0.1401	0.037975	0.2246	FALSE	FALSE	FALSE	5hmd9b	154372502	0.169801	0.0276616	outcome	TRUE	reported	textfile	2.07998e-06	3	154090291	3658	0.02947	TRUE	reported	igd	2	TRUE	0.00614041	22.588	21.4235
	rs7265879	G	C	G	C	-0.2182	0.121957	0.0778	FALSE	TRUE	TRUE	5hmd9b	6122694	0.0584467	0.0644481	outcome	TRUE	reported	textfile	2.35798e-06	20	6103341	3658	0.04616	TRUE	reported	igd	2	FALSE	0.00607141	22.3327	21.4235
	rs74786971	C	G	C	G	0.2235	0.0225812	0.0645	FALSE	TRUE	TRUE	5hmd9b	89988025	0.621182	0.0456949	outcome	TRUE	reported	textfile	6.60602e-06	4	90909176	3658	0.04952	TRUE	reported	igd	2	FALSE	0.00553781	20.359	21.4235
	rs75368642	T	C	T	C	0.2118	0.108708	0.073	FALSE	FALSE	FALSE	5hmd9b	151272722	0.0321529	0.0507389	outcome	TRUE	reported	textfile	6.41904e-06	7	150969808	3658	0.04687	TRUE	reported	igd	2	TRUE	0.00555138	20.4091	21.4235
	rs75951284	T	C	T	C	0.3083	0.0412771	0.0316	FALSE	FALSE	FALSE	5hmd9b	187921008	0.615791	0.0822539	outcome	TRUE	reported	textfile	5.11105e-06	3	187638796	3658	0.06752	TRUE	reported	igd	2	TRUE	0.00566722	20.8375	21.4235
	rs7875273	C	T	C	T	0.1137	0.0342149	0.3779	FALSE	FALSE	FALSE	5hmd9b	9023522	0.157411	0.0242001	outcome	TRUE	reported	textfile	5.83002e-06	9	9023522	3658	0.02506	TRUE	reported	igd	2	TRUE	0.005596	20.5741	21.4235
	rs9270911	T	C	T	C	0.1364	0.0272059	0.6083	FALSE	FALSE	FALSE	5hmd9b	32604425	0.255067	0.023904	outcome	TRUE	reported	textfile	2.10499e-06	6	32572202	3658	0.02871	TRUE	reported	igd	2	TRUE	0.00613263	22.5593	21.4235
	rs9477367	C	T	C	T	-0.1917	0.0639934	0.9097	FALSE	FALSE	FALSE	5hmd9b	17249265	0.0648605	0.0346619	outcome	TRUE	reported	textfile	7.45899e-06	6	17249496	3658	0.04273	TRUE	reported	igd	2	TRUE	0.00547207	20.116	21.4235
GCST90001420	rs10815908	T	G	T	G	0.2526	-0.0476439	0.0511	FALSE	FALSE	FALSE	qv4EwT	8537763	0.23537	0.0401503	outcome	TRUE	reported	textfile	2.75797e-06	9	8537763	3656	0.0538	TRUE	reported	igd	2	TRUE	0.00599356	22.0325	21.4901
	rs114044800	C	G	C	G	0.5637	0.114457	0.0086	FALSE	TRUE	TRUE	qv4EwT	236914834	0.218958	0.0931075	outcome	TRUE	reported	textfile	7.81592e-06	2	237823477	3656	0.1259	TRUE	reported	igd	2	FALSE	0.00545335	20.0358	21.4901
	rs115156019	T	C	T	C	-0.6197	0.030664	0.0081	FALSE	FALSE	FALSE	qv4EwT	168258157	0.583774	0.0559683	outcome	TRUE	reported	textfile	6.33199e-07	1	168227395	3656	0.1242	TRUE	reported	igd	2	TRUE	0.00676342	24.8818	21.4901
	rs11605946	A	G	A	G	0.1457	0.029291	0.1637	FALSE	FALSE	FALSE	qv4EwT	19525480	0.385294	0.0337382	outcome	TRUE	reported	textfile	5.15905e-06	11	19547027	3656	0.03191	TRUE	reported	igd	2	TRUE	0.00567009	20.8366	21.4901
	rs11609248	G	A	G	A	-0.1355	0.0702154	0.1916	FALSE	FALSE	FALSE	qv4EwT	14164273	0.287175	0.0659709	outcome	TRUE	reported	textfile	7.11295e-06	12	14317207	3656	0.03014	TRUE	reported	igd	2	TRUE	0.00549783	20.2001	21.4901
	rs138158989	A	G	A	G	-1.339	0.325392	0.0018	FALSE	FALSE	FALSE	qv4EwT	203611912	0.143703	0.222545	outcome	TRUE	reported	textfile	2.33099e-06	2	204476635	3656	0.2832	TRUE	reported	igd	2	TRUE	0.00607744	22.3428	21.4901
	rs147319637	A	G	A	G	-0.5657	0.0740025	0.0094	FALSE	FALSE	FALSE	qv4EwT	111340898	0.239296	0.0628873	outcome	TRUE	reported	textfile	3.92401e-06	11	111211623	3656	0.1224	TRUE	reported	igd	2	TRUE	0.00580862	21.3487	21.4901
	rs148362575	T	A	T	A	2.541	0.0142835	0.0008	FALSE	TRUE	TRUE	qv4EwT	186300608	0.881937	0.096176	outcome	TRUE	reported	textfile	1.64101e-06	2	187165335	3656	0.5292	TRUE	reported	igd	2	FALSE	0.00626662	23.0426	21.4901
	rs17037450	A	G	A	G	-0.3311	-0.0757202	0.0264	FALSE	FALSE	FALSE	qv4EwT	105704536	0.12942	0.0499343	outcome	TRUE	reported	textfile	4.90501e-06	12	106098314	3656	0.07236	TRUE	reported	igd	2	TRUE	0.00569423	20.9259	21.4901
	rs2075365	A	G	A	G	-0.1142	-0.00274436	0.6518	FALSE	FALSE	FALSE	qv4EwT	30940032	0.912741	0.0250441	outcome	TRUE	reported	textfile	4.14801e-06	12	31092966	3656	0.02477	TRUE	reported	igd	2	TRUE	0.00578038	21.2443	21.4901
	rs2792563	A	G	A	G	-0.108	0.0627342	0.5671	FALSE	FALSE	FALSE	qv4EwT	212926883	0.00800756	0.0236577	outcome	TRUE	reported	textfile	9.59909e-06	1	213100225	3656	0.02437	TRUE	reported	igd	2	TRUE	0.00534323	19.629	21.4901
	rs3105149	T	A	T	A	0.3462	-0.021762	0.0239	FALSE	TRUE	TRUE	qv4EwT	36474532	0.81673	0.0939018	outcome	TRUE	reported	textfile	8.27409e-06	5	36474634	3656	0.07754	TRUE	reported	igd	2	FALSE	0.00542294	19.9235	21.4901
	rs478251	C	A	C	A	0.1689	0.0189357	0.1332	FALSE	FALSE	FALSE	qv4EwT	127957832	0.513477	0.0289787	outcome	TRUE	reported	textfile	8.85503e-07	11	127827727	3656	0.03431	TRUE	reported	igd	2	TRUE	0.0065848	24.2203	21.4901
	rs62353585	C	T	C	T	0.3438	-0.208728	0.0227	FALSE	FALSE	FALSE	qv4EwT	167181559	0.067214	0.114044	outcome	TRUE	reported	textfile	8.48301e-06	4	168102710	3656	0.07709	TRUE	reported	igd	2	TRUE	0.0054107	19.8782	21.4901
	rs66491584	A	G	A	G	-0.1466	0.0215348	0.1991	FALSE	FALSE	FALSE	qv4EwT	20938906	0.417765	0.0265762	outcome	TRUE	reported	textfile	7.43293e-07	3	20980398	3656	0.02957	TRUE	reported	igd	2	TRUE	0.00667804	24.5656	21.4901
	rs72834736	C	G	C	G	0.3465	0.0215174	0.0248	FALSE	TRUE	TRUE	qv4EwT	81787756	0.550753	0.0360648	outcome	TRUE	reported	textfile	8.30501e-06	16	81821361	3656	0.07762	TRUE	reported	igd	2	FALSE	0.00542116	19.9169	21.4901
	rs74011406	A	G	A	G	0.1928	0.0252783	0.093	FALSE	FALSE	FALSE	qv4EwT	47338837	0.538043	0.0410512	outcome	TRUE	reported	textfile	2.869e-06	15	47631034	3656	0.04113	TRUE	reported	igd	2	TRUE	0.00597431	21.9613	21.4901
	rs78678130	A	G	A	G	-0.1707	-0.0841626	0.1076	FALSE	FALSE	FALSE	qv4EwT	106152385	0.245753	0.0725085	outcome	TRUE	reported	textfile	8.03193e-06	7	105792831	3656	0.03819	TRUE	reported	igd	2	TRUE	0.00543494	19.9678	21.4901
	rs79801395	C	G	C	G	0.1973	-0.11173	0.0799	FALSE	TRUE	TRUE	qv4EwT	97885814	0.113794	0.0706543	outcome	TRUE	reported	textfile	6.68606e-06	11	97756814	3656	0.04374	TRUE	reported	igd	2	FALSE	0.00553452	20.3357	21.4901
	rs912755	C	G	C	G	-2.494	0.173264	0.9996	FALSE	TRUE	TRUE	qv4EwT	7442223	0.173957	0.127438	outcome	TRUE	reported	textfile	2.16202e-06	10	7484185	3656	0.5255	TRUE	reported	igd	2	FALSE	0.00612314	22.5118	21.4901
GCST90001421	rs111761453	T	G	T	G	0.249	0.0268786	0.0524	FALSE	FALSE	FALSE	awR7QW	137488920	0.677476	0.0646261	outcome	TRUE	reported	textfile	5.77006e-06	7	137173666	3657	0.05482	TRUE	reported	igd	2	TRUE	0.00560987	20.6197	21.5753
	rs116699251	A	G	A	G	-0.2732	-0.0130119	0.0446	FALSE	FALSE	FALSE	awR7QW	143039896	0.806374	0.0530868	outcome	TRUE	reported	textfile	3.24399e-06	5	142419461	3657	0.05861	TRUE	reported	igd	2	TRUE	0.00590636	21.716	21.5753
	rs12146943	A	G	A	G	-0.1127	0.00717105	0.3704	FALSE	FALSE	FALSE	awR7QW	20502736	0.772286	0.0247802	outcome	TRUE	reported	textfile	6.50594e-06	13	21076875	3657	0.02495	TRUE	reported	igd	2	TRUE	0.00554837	20.3924	21.5753
	rs16936840	T	C	T	C	0.1881	0.0052639	0.102	FALSE	FALSE	FALSE	awR7QW	19509581	0.871895	0.0326439	outcome	TRUE	reported	textfile	3.49897e-06	11	19531128	3657	0.04049	TRUE	reported	igd	2	TRUE	0.0058668	21.5697	21.5753
	rs2212443	G	T	G	T	-0.1412	-0.00481573	0.8048	FALSE	FALSE	FALSE	awR7QW	88398029	0.870956	0.0296455	outcome	TRUE	reported	textfile	6.07799e-06	11	88131197	3657	0.03117	TRUE	reported	igd	2	TRUE	0.00558008	20.5096	21.5753
	rs252298	A	G	A	G	0.1091	-0.033349	0.5643	FALSE	FALSE	FALSE	awR7QW	29221646	0.162221	0.0238609	outcome	TRUE	reported	textfile	6.60998e-06	16	29232967	3657	0.02419	TRUE	reported	igd	2	TRUE	0.00553151	20.3301	21.5753
	rs2637364	C	T	C	T	-0.1164	0.0101887	0.6221	FALSE	FALSE	FALSE	awR7QW	33751859	0.668093	0.0237627	outcome	TRUE	reported	textfile	3.75301e-06	17	32078878	3657	0.02513	TRUE	reported	igd	2	TRUE	0.00583251	21.4429	21.5753
	rs34625183	T	C	T	C	-0.1694	-0.0311558	0.1154	FALSE	FALSE	FALSE	awR7QW	146380132	0.494079	0.0455604	outcome	TRUE	reported	textfile	8.03397e-06	3	146097919	3657	0.03789	TRUE	reported	igd	2	TRUE	0.00543607	19.9774	21.5753
	rs36123742	T	A	T	A	0.1193	0.0197061	0.6555	FALSE	TRUE	TRUE	awR7QW	133534875	0.420032	0.0244381	outcome	TRUE	reported	textfile	4.11396e-06	3	133253719	3657	0.02587	TRUE	reported	igd	2	FALSE	0.00578156	21.2545	21.5753
	rs38182	T	C	T	C	-0.1541	0.0469574	0.1693	FALSE	FALSE	FALSE	awR7QW	15861025	0.392583	0.0549246	outcome	TRUE	reported	textfile	3.21203e-06	7	15900650	3657	0.03305	TRUE	reported	igd	2	TRUE	0.00590967	21.7283	21.5753
	rs41494	T	A	T	A	1.728	0.00228385	0.999	FALSE	TRUE	TRUE	awR7QW	9688168	0.966735	0.0547632	outcome	TRUE	reported	textfile	6.26397e-06	5	9688280	3657	0.3819	TRUE	reported	igd	2	FALSE	0.00556722	20.4621	21.5753
	rs56736306	G	C	G	C	-0.1465	0.0122118	0.1719	FALSE	TRUE	TRUE	awR7QW	87806971	0.723879	0.0345668	outcome	TRUE	reported	textfile	5.91602e-06	16	87840577	3657	0.03231	TRUE	reported	igd	2	FALSE	0.00559038	20.5477	21.5753
	rs57641238	C	G	C	G	-0.1546	-0.00485225	0.2252	FALSE	TRUE	TRUE	awR7QW	75309427	0.885955	0.0338313	outcome	TRUE	reported	textfile	1.47999e-07	2	75536553	3657	0.02937	TRUE	reported	igd	2	FALSE	0.00751983	27.6932	21.5753
	rs6008703	C	G	C	G	-0.1147	-0.00604927	0.3131	FALSE	TRUE	TRUE	awR7QW	48441838	0.824621	0.0272975	outcome	TRUE	reported	textfile	9.67409e-06	22	48837650	3657	0.02589	TRUE	reported	igd	2	FALSE	0.00533842	19.6167	21.5753
	rs6029245	C	T	C	T	0.3071	-0.069095	0.0358	FALSE	FALSE	FALSE	awR7QW	40639350	0.458818	0.0932714	outcome	TRUE	reported	textfile	3.23102e-06	20	39267990	3657	0.06585	TRUE	reported	igd	2	TRUE	0.00591218	21.7375	21.5753
	rs6052993	G	C	G	C	-0.1123	-0.0469762	0.4371	FALSE	TRUE	TRUE	awR7QW	4964192	0.0490784	0.0238711	outcome	TRUE	reported	textfile	5.17095e-06	20	4944838	3657	0.0246	TRUE	reported	igd	2	FALSE	0.00566626	20.8282	21.5753
	rs6482467	G	A	G	A	-0.1128	0.00859952	0.3646	FALSE	FALSE	FALSE	awR7QW	25031294	0.722918	0.024254	outcome	TRUE	reported	textfile	9.72098e-06	10	25320223	3657	0.02546	TRUE	reported	igd	2	TRUE	0.0053389	19.6184	21.5753
	rs6586822	C	T	C	T	-0.1182	0.0217035	0.6508	FALSE	FALSE	FALSE	awR7QW	19282003	0.386075	0.0250399	outcome	TRUE	reported	textfile	4.34901e-06	8	19139514	3657	0.02568	TRUE	reported	igd	2	TRUE	0.00575985	21.1742	21.5753
	rs6712095	T	G	T	G	0.3592	0.126111	0.0246	FALSE	FALSE	FALSE	awR7QW	204758774	0.225541	0.104059	outcome	TRUE	reported	textfile	6.32499e-06	2	205623497	3657	0.07943	TRUE	reported	igd	2	TRUE	0.00556105	20.4393	21.5753
	rs71431666	C	G	C	G	-0.1932	0.0246753	0.0946	FALSE	TRUE	TRUE	awR7QW	94800510	0.619019	0.0496244	outcome	TRUE	reported	textfile	3.49398e-06	14	95266847	3657	0.04158	TRUE	reported	igd	2	FALSE	0.005869	21.5778	21.5753
	rs74786971	C	G	C	G	0.2348	0.0225812	0.0645	FALSE	TRUE	TRUE	awR7QW	89988025	0.621182	0.0456949	outcome	TRUE	reported	textfile	2.031e-06	4	90909176	3657	0.04935	TRUE	reported	igd	2	FALSE	0.00615201	22.6248	21.5753
	rs77553819	C	G	C	G	-0.1249	0.0276808	0.2863	FALSE	TRUE	TRUE	awR7QW	24308263	0.343298	0.0292093	outcome	TRUE	reported	textfile	3.51901e-06	13	24882401	3657	0.0269	TRUE	reported	igd	2	FALSE	0.00586061	21.5468	21.5753
	rs7773849	G	A	G	A	1.508	-0.04664	0.0018	FALSE	FALSE	FALSE	awR7QW	128232373	0.233939	0.0391842	outcome	TRUE	reported	textfile	8.31209e-08	6	128553518	3657	0.2808	TRUE	reported	igd	2	TRUE	0.00782478	28.8251	21.5753
GCST90001422	rs117308259	C	T	C	T	-0.8348	0.168591	0.0066	FALSE	FALSE	FALSE	OWy7kK	31524295	0.0405061	0.0822976	outcome	TRUE	reported	textfile	2.48199e-08	14	31993501	3659	0.1494	TRUE	reported	igd	2	TRUE	0.00846079	31.2051	21.846
	rs118073973	A	T	A	T	0.2799	-0.0644326	0.0402	FALSE	TRUE	TRUE	OWy7kK	19948910	0.583765	0.117601	outcome	TRUE	reported	textfile	5.45306e-06	9	19948908	3659	0.06148	TRUE	reported	igd	2	FALSE	0.00563278	20.7157	21.846
	rs13176237	G	A	G	A	0.2113	-0.0469769	0.0696	FALSE	FALSE	FALSE	OWy7kK	42352942	0.175252	0.0346559	outcome	TRUE	reported	textfile	9.12494e-06	5	42353044	3659	0.04756	TRUE	reported	igd	2	TRUE	0.00536558	19.7278	21.846
	rs141595421	G	T	G	T	-0.4902	0.135089	0.0127	FALSE	FALSE	FALSE	OWy7kK	63506519	0.20406	0.106364	outcome	TRUE	reported	textfile	8.62303e-06	3	63492195	3659	0.11	TRUE	reported	igd	2	TRUE	0.00539819	19.8483	21.846
	rs16955339	T	G	T	G	0.293	0.00635096	0.0377	FALSE	FALSE	FALSE	OWy7kK	54893699	0.927146	0.0694578	outcome	TRUE	reported	textfile	2.56803e-06	17	52971060	3659	0.06221	TRUE	reported	igd	2	TRUE	0.00602598	22.1706	21.846
	rs17099538	C	T	C	T	-0.2409	-0.0541868	0.0559	FALSE	FALSE	FALSE	OWy7kK	32785112	0.152154	0.0378409	outcome	TRUE	reported	textfile	3.093e-06	14	33254318	3659	0.05156	TRUE	reported	igd	2	TRUE	0.00593065	21.8178	21.846
	rs182720746	T	C	T	C	0.6255	0.147248	0.0089	FALSE	FALSE	FALSE	OWy7kK	112171727	0.0288383	0.0673692	outcome	TRUE	reported	textfile	2.014e-06	4	113092883	3659	0.1314	TRUE	reported	igd	2	TRUE	0.00615489	22.6478	21.846
	rs2113943	G	A	G	A	0.1278	0.0428919	0.2288	FALSE	FALSE	FALSE	OWy7kK	60603437	0.0697349	0.0236499	outcome	TRUE	reported	textfile	9.10395e-06	15	60895636	3659	0.02875	TRUE	reported	igd	2	TRUE	0.00537136	19.7492	21.846
	rs2215848	A	G	A	G	0.524	-0.210587	0.0118	FALSE	FALSE	FALSE	OWy7kK	25063599	0.124791	0.137193	outcome	TRUE	reported	textfile	3.06902e-06	4	25065221	3659	0.1121	TRUE	reported	igd	2	TRUE	0.00593613	21.8381	21.846
	rs2339996	A	G	A	G	-0.1471	-0.019332	0.7803	FALSE	FALSE	FALSE	OWy7kK	173643502	0.521785	0.0301782	outcome	TRUE	reported	textfile	3.11602e-07	5	173070505	3659	0.0287	TRUE	reported	igd	2	TRUE	0.0071284	26.2557	21.846
	rs34666228	T	G	T	G	0.1355	-0.0076956	0.2346	FALSE	FALSE	FALSE	OWy7kK	123514717	0.77809	0.0273079	outcome	TRUE	reported	textfile	1.45902e-06	11	123385425	3659	0.02809	TRUE	reported	igd	2	TRUE	0.00631916	23.2561	21.846
	rs35639639	C	T	C	T	0.1332	0.0238006	0.2062	FALSE	FALSE	FALSE	OWy7kK	5438090	0.436944	0.0306171	outcome	TRUE	reported	textfile	8.60399e-06	16	5488091	3659	0.0299	TRUE	reported	igd	2	TRUE	0.00539454	19.8348	21.846
	rs36071180	A	G	A	G	0.1488	-0.0420559	0.1596	FALSE	FALSE	FALSE	OWy7kK	784521	0.421923	0.0523676	outcome	TRUE	reported	textfile	8.077e-06	20	765164	3659	0.03329	TRUE	reported	igd	2	TRUE	0.00543064	19.9683	21.846
	rs396692	A	G	A	G	0.1157	-0.0245511	0.6682	FALSE	FALSE	FALSE	OWy7kK	162632709	0.373206	0.0275705	outcome	TRUE	reported	textfile	5.99998e-06	4	163553861	3659	0.02552	TRUE	reported	igd	2	TRUE	0.00558612	20.5432	21.846
	rs4832496	A	G	A	G	0.127	0.062777	0.236	FALSE	FALSE	FALSE	OWy7kK	17571271	0.00836354	0.023806	outcome	TRUE	reported	textfile	6.54305e-06	2	17752538	3659	0.02814	TRUE	reported	igd	2	TRUE	0.00553587	20.3574	21.846
	rs55767134	C	G	C	G	-0.1463	-0.0574821	0.1838	FALSE	TRUE	TRUE	OWy7kK	17006436	0.0849767	0.033371	outcome	TRUE	reported	textfile	2.90202e-06	10	17048435	3659	0.03122	TRUE	reported	igd	2	FALSE	0.00596571	21.9475	21.846
	rs55897487	T	C	T	C	-1.342	0.0813985	0.0016	FALSE	FALSE	FALSE	OWy7kK	152540	0.567822	0.142489	outcome	TRUE	reported	textfile	3.73104e-06	12	261706	3659	0.2897	TRUE	reported	igd	2	TRUE	0.0058305	21.4472	21.846
	rs56284619	T	C	T	C	0.1557	-0.0337383	0.1469	FALSE	FALSE	FALSE	OWy7kK	89304264	0.422919	0.0421009	outcome	TRUE	reported	textfile	5.72005e-06	6	90013983	3659	0.03428	TRUE	reported	igd	2	TRUE	0.0056065	20.6186	21.846
	rs6125184	A	G	A	G	-0.1186	-0.00980525	0.5914	FALSE	FALSE	FALSE	OWy7kK	47947970	0.679527	0.0237353	outcome	TRUE	reported	textfile	1.547e-06	20	46576714	3659	0.02463	TRUE	reported	igd	2	TRUE	0.00629702	23.1741	21.846
	rs62311900	T	C	T	C	-0.1398	-0.027243	0.1735	FALSE	FALSE	FALSE	OWy7kK	73279470	0.464088	0.0372105	outcome	TRUE	reported	textfile	9.85598e-06	4	74145187	3659	0.03159	TRUE	reported	igd	2	TRUE	0.00532395	19.5739	21.846
	rs72652459	T	C	T	C	-1.505	0.0716983	0.0012	FALSE	FALSE	FALSE	OWy7kK	22099417	0.306929	0.0701763	outcome	TRUE	reported	textfile	9.20005e-06	9	22099416	3659	0.3389	TRUE	reported	igd	2	TRUE	0.00536084	19.7103	21.846
	rs75839951	G	T	G	T	-0.2476	-0.0133322	0.0585	FALSE	FALSE	FALSE	OWy7kK	34266522	0.763213	0.0442544	outcome	TRUE	reported	textfile	1.92801e-06	2	34491589	3659	0.05192	TRUE	reported	igd	2	TRUE	0.00617701	22.7297	21.846
	rs78301150	A	G	A	G	-1.069	-0.0195442	0.0033	FALSE	FALSE	FALSE	OWy7kK	81839613	0.68886	0.0488112	outcome	TRUE	reported	textfile	1.42099e-06	12	82233392	3659	0.2213	TRUE	reported	igd	2	TRUE	0.00633679	23.3214	21.846
GCST90001423	rs11203884	T	C	T	C	-0.1548	-0.00744051	0.1643	FALSE	FALSE	FALSE	fdLNKH	17659055	0.815723	0.0319267	outcome	TRUE	reported	textfile	2.26898e-06	8	17516564	3658	0.03269	TRUE	reported	igd	2	TRUE	0.00609276	22.4117	22.0809
	rs117308259	C	T	C	T	-0.6917	0.168591	0.0066	FALSE	FALSE	FALSE	fdLNKH	31524295	0.0405061	0.0822976	outcome	TRUE	reported	textfile	4.39896e-06	14	31993501	3658	0.1504	TRUE	reported	igd	2	TRUE	0.005749	21.1399	22.0809
	rs118073973	A	T	A	T	0.2899	-0.0644326	0.0402	FALSE	TRUE	TRUE	fdLNKH	19948910	0.583765	0.117601	outcome	TRUE	reported	textfile	2.87303e-06	9	19948908	3658	0.06184	TRUE	reported	igd	2	FALSE	0.0059719	21.9644	22.0809
	rs16955339	T	G	T	G	0.3095	0.00635096	0.0377	FALSE	FALSE	FALSE	fdLNKH	54893699	0.927146	0.0694578	outcome	TRUE	reported	textfile	7.67397e-07	17	52971060	3658	0.06249	TRUE	reported	igd	2	TRUE	0.00666122	24.5167	22.0809
	rs182720746	T	C	T	C	0.6026	0.147248	0.0089	FALSE	FALSE	FALSE	fdLNKH	112171727	0.0288383	0.0673692	outcome	TRUE	reported	textfile	5.38096e-06	4	113092883	3658	0.1323	TRUE	reported	igd	2	TRUE	0.00563948	20.7349	22.0809
	rs2339996	A	G	A	G	-0.1438	-0.019332	0.7802	FALSE	FALSE	FALSE	fdLNKH	173643502	0.521785	0.0301782	outcome	TRUE	reported	textfile	6.60496e-07	5	173070505	3658	0.02887	TRUE	reported	igd	2	TRUE	0.00673666	24.7963	22.0809
	rs308820	C	T	C	T	-0.1305	0.00199597	0.7571	FALSE	FALSE	FALSE	fdLNKH	88408863	0.936247	0.0249535	outcome	TRUE	reported	textfile	4.63095e-06	11	88142031	3658	0.02844	TRUE	reported	igd	2	TRUE	0.00572302	21.0438	22.0809
	rs36071180	A	G	A	G	0.1498	-0.0420559	0.1597	FALSE	FALSE	FALSE	fdLNKH	784521	0.421923	0.0523676	outcome	TRUE	reported	textfile	7.69892e-06	20	765164	3658	0.03344	TRUE	reported	igd	2	TRUE	0.00545596	20.0564	22.0809
	rs6125184	A	G	A	G	-0.1099	-0.00980525	0.5914	FALSE	FALSE	FALSE	fdLNKH	47947970	0.679527	0.0237353	outcome	TRUE	reported	textfile	9.59599e-06	20	46576714	3658	0.02479	TRUE	reported	igd	2	TRUE	0.00534406	19.6429	22.0809
	rs61906277	G	A	G	A	0.1435	-0.00795236	0.2347	FALSE	FALSE	FALSE	fdLNKH	123514093	0.770872	0.0273055	outcome	TRUE	reported	textfile	3.99098e-07	11	123384801	3658	0.02825	TRUE	reported	igd	2	TRUE	0.00700439	25.7887	22.0809
	rs62311900	T	C	T	C	-0.1537	-0.027243	0.1736	FALSE	FALSE	FALSE	fdLNKH	73279470	0.464088	0.0372105	outcome	TRUE	reported	textfile	1.33801e-06	4	74145187	3658	0.03175	TRUE	reported	igd	2	TRUE	0.00636566	23.4219	22.0809
	rs6906886	A	T	A	T	0.1893	0.0155705	0.903	FALSE	TRUE	TRUE	fdLNKH	84329133	0.705732	0.0412362	outcome	TRUE	reported	textfile	3.29299e-06	6	85038851	3658	0.04063	TRUE	reported	igd	2	FALSE	0.00589922	21.6955	22.0809
	rs75609575	A	G	A	G	-0.3072	-0.0266848	0.0349	FALSE	FALSE	FALSE	fdLNKH	97768659	0.830575	0.124717	outcome	TRUE	reported	textfile	3.45096e-06	11	97639659	3658	0.06608	TRUE	reported	igd	2	TRUE	0.00587354	21.6006	22.0809
	rs77510701	A	C	A	C	-0.2548	0.06003	0.0484	FALSE	FALSE	FALSE	fdLNKH	37258143	0.595315	0.113019	outcome	TRUE	reported	textfile	6.74e-06	18	34838106	3658	0.05651	TRUE	reported	igd	2	TRUE	0.0055271	20.3194	22.0809
GCST90001424	rs111830700	A	G	A	G	0.2879	-0.0398939	0.0377	FALSE	FALSE	FALSE	CglORP	121692346	0.615068	0.0793353	outcome	TRUE	reported	textfile	5.202e-06	7	121332400	3657	0.06309	TRUE	reported	igd	2	TRUE	0.00566202	20.8125	24.7146
	rs11657531	T	C	T	C	-0.1468	-0.01976	0.4882	FALSE	FALSE	FALSE	CglORP	2828076	0.41702	0.024347	outcome	TRUE	reported	textfile	5.52497e-10	17	2731370	3657	0.0236	TRUE	reported	igd	2	TRUE	0.0104697	38.6715	24.7146
	rs116906133	G	A	G	A	-1.032	-0.0454807	0.0037	FALSE	FALSE	FALSE	CglORP	99371651	0.318275	0.0455715	outcome	TRUE	reported	textfile	2.22398e-06	13	100023905	3657	0.2178	TRUE	reported	igd	2	TRUE	0.00610184	22.4391	24.7146
	rs12874404	G	A	G	A	0.1898	-0.0269776	0.3257	FALSE	FALSE	FALSE	CglORP	108341146	0.67766	0.0649035	outcome	TRUE	reported	textfile	3.43084e-13	13	108993494	3657	0.02599	TRUE	reported	igd	2	TRUE	0.0143737	53.3018	24.7146
	rs12939565	T	A	T	A	-0.142	-0.0418282	0.4267	FALSE	TRUE	TRUE	CglORP	39882136	0.0757809	0.0235558	outcome	TRUE	reported	textfile	2.45499e-07	17	38038389	3657	0.02747	TRUE	reported	igd	2	FALSE	0.00725392	26.7068	24.7146
	rs141070091	T	G	T	G	0.614	-0.00970045	0.0081	FALSE	FALSE	FALSE	CglORP	46713863	0.875623	0.0619756	outcome	TRUE	reported	textfile	6.96803e-06	4	46715880	3657	0.1364	TRUE	reported	igd	2	TRUE	0.0055104	20.2521	24.7146
	rs143109147	C	T	C	T	2.746	0.162026	0.0004	FALSE	FALSE	FALSE	CglORP	39921699	0.0155375	0.0669638	outcome	TRUE	reported	textfile	3.27198e-06	1	40387371	3657	0.5892	TRUE	reported	igd	2	TRUE	0.00590444	21.7089	24.7146
	rs16837671	G	T	G	T	-0.2827	0.0246818	0.0494	FALSE	FALSE	FALSE	CglORP	205791229	0.743625	0.0754665	outcome	TRUE	reported	textfile	7.43207e-07	2	206655953	3657	0.05702	TRUE	reported	igd	2	TRUE	0.00667672	24.5674	24.7146
	rs1977295	A	G	A	G	0.1101	-0.0310578	0.5273	FALSE	FALSE	FALSE	CglORP	7146522	0.189912	0.0236931	outcome	TRUE	reported	textfile	3.11401e-06	10	7188484	3657	0.02357	TRUE	reported	igd	2	TRUE	0.00593126	21.8081	24.7146
	rs2395904	G	T	G	T	-0.1285	0.000463352	0.2657	FALSE	FALSE	FALSE	CglORP	129605573	0.986168	0.026727	outcome	TRUE	reported	textfile	2.243e-06	8	130617819	3657	0.02712	TRUE	reported	igd	2	TRUE	0.0061016	22.4383	24.7146
	rs2402519	C	G	C	G	0.1596	0.0213004	0.1523	FALSE	TRUE	TRUE	CglORP	94907128	0.440457	0.0276119	outcome	TRUE	reported	textfile	2.10402e-06	14	95373465	3657	0.03359	TRUE	reported	igd	2	FALSE	0.00613547	22.5636	24.7146
	rs34910780	T	A	T	A	-0.2739	0.128797	0.0481	FALSE	TRUE	TRUE	CglORP	77840371	0.174448	0.0948398	outcome	TRUE	reported	textfile	1.25101e-06	7	77469688	3657	0.05642	TRUE	reported	igd	2	FALSE	0.00640329	23.5548	24.7146
	rs4361609	C	G	C	G	-0.2101	0.0321917	0.1131	FALSE	TRUE	TRUE	CglORP	31272858	0.252459	0.0281298	outcome	TRUE	reported	textfile	6.78297e-07	6	31240635	3657	0.04223	TRUE	reported	igd	2	FALSE	0.00672288	24.7384	24.7146
	rs55658072	G	A	G	A	0.1165	0.0214475	0.6218	FALSE	FALSE	FALSE	CglORP	14762472	0.370475	0.0239481	outcome	TRUE	reported	textfile	3.23601e-06	19	14873284	3657	0.02499	TRUE	reported	igd	2	TRUE	0.00590774	21.7211	24.7146
	rs6131010	G	A	G	A	-0.1212	0.0798304	0.6172	FALSE	FALSE	FALSE	CglORP	46095666	0.00201916	0.0258568	outcome	TRUE	reported	textfile	2.47098e-06	20	44724305	3657	0.02568	TRUE	reported	igd	2	TRUE	0.00605415	22.2627	24.7146
	rs73078428	A	T	A	T	-0.1651	0.0387259	0.1318	FALSE	TRUE	TRUE	CglORP	20066406	0.531383	0.0618728	outcome	TRUE	reported	textfile	4.854e-06	7	20106029	3657	0.03606	TRUE	reported	igd	2	FALSE	0.00569948	20.951	24.7146
	rs75319860	C	T	C	T	0.3546	0.00424325	0.0249	FALSE	FALSE	FALSE	CglORP	109874424	0.966086	0.0997986	outcome	TRUE	reported	textfile	6.84101e-06	12	110312229	3657	0.0787	TRUE	reported	igd	2	TRUE	0.00552076	20.2904	24.7146
	rs75956343	G	A	G	A	-0.2576	0.0179199	0.0469	FALSE	FALSE	FALSE	CglORP	72214116	0.506022	0.0269453	outcome	TRUE	reported	textfile	8.75407e-06	17	70210257	3657	0.05786	TRUE	reported	igd	2	TRUE	0.00539091	19.8106	24.7146
	rs76845048	C	A	C	A	-0.3021	-0.0671884	0.0357	FALSE	FALSE	FALSE	CglORP	116449797	0.549722	0.112322	outcome	TRUE	reported	textfile	4.76299e-06	5	115785493	3657	0.06594	TRUE	reported	igd	2	TRUE	0.00570681	20.9781	24.7146
GCST90001425	rs113087021	A	T	A	T	0.1975	-0.0929533	0.0766	FALSE	TRUE	TRUE	aPrUet	97894784	0.179693	0.0692803	outcome	TRUE	reported	textfile	8.62204e-06	11	97765784	3656	0.04432	TRUE	reported	igd	2	FALSE	0.00540227	19.8471	21.7795
	rs114428590	A	T	A	T	-0.6902	0.0405328	0.0059	FALSE	TRUE	TRUE	aPrUet	60223573	0.564674	0.0703803	outcome	TRUE	reported	textfile	8.88608e-06	4	61089291	3656	0.1551	TRUE	reported	igd	2	FALSE	0.00538734	19.792	21.7795
	rs11609248	G	A	G	A	-0.1438	0.0702154	0.1916	FALSE	FALSE	FALSE	aPrUet	14164273	0.287175	0.0659709	outcome	TRUE	reported	textfile	1.64801e-06	12	14317207	3656	0.02996	TRUE	reported	igd	2	TRUE	0.00626181	23.0248	21.7795
	rs116540222	T	C	T	C	1.619	-0.0143148	0.0011	FALSE	FALSE	FALSE	aPrUet	117612409	0.868738	0.086619	outcome	TRUE	reported	textfile	7.48204e-06	3	117331256	3656	0.361	TRUE	reported	igd	2	TRUE	0.0054713	20.1021	21.7795
	rs11938966	A	C	A	C	0.3028	0.00829703	0.0294	FALSE	FALSE	FALSE	aPrUet	54520674	0.834687	0.0397569	outcome	TRUE	reported	textfile	9.29309e-06	4	55386841	3656	0.06821	TRUE	reported	igd	2	TRUE	0.00536136	19.696	21.7795
	rs12340211	G	C	G	C	0.2558	-0.0358759	0.0518	FALSE	TRUE	TRUE	aPrUet	8531036	0.376492	0.0405662	outcome	TRUE	reported	textfile	1.907e-06	9	8531036	3656	0.05361	TRUE	reported	igd	2	FALSE	0.00618881	22.7547	21.7795
	rs138158989	A	G	A	G	-1.324	0.325392	0.0018	FALSE	FALSE	FALSE	aPrUet	203611912	0.143703	0.222545	outcome	TRUE	reported	textfile	2.49799e-06	2	204476635	3656	0.2808	TRUE	reported	igd	2	TRUE	0.00604425	22.22	21.7795
	rs139101653	T	C	T	C	-0.4998	-0.125679	0.0129	FALSE	FALSE	FALSE	aPrUet	31306397	0.265216	0.112803	outcome	TRUE	reported	textfile	8.62303e-06	6	31274174	3656	0.1122	TRUE	reported	igd	2	TRUE	0.00539821	19.8321	21.7795
	rs148362575	T	A	T	A	2.567	0.0142835	0.0008	FALSE	TRUE	TRUE	aPrUet	186300608	0.881937	0.096176	outcome	TRUE	reported	textfile	1.93299e-06	2	187165335	3656	0.5384	TRUE	reported	igd	2	FALSE	0.00617936	22.7198	21.7795
	rs148377259	C	T	C	T	-0.311	-0.0794679	0.0341	FALSE	FALSE	FALSE	aPrUet	106666185	0.193197	0.0610737	outcome	TRUE	reported	textfile	1.47001e-06	7	106306631	3656	0.06449	TRUE	reported	igd	2	TRUE	0.00632086	23.2433	21.7795
	rs151009998	A	G	A	G	0.2925	0.106202	0.0379	FALSE	FALSE	FALSE	aPrUet	11670813	0.214601	0.0855768	outcome	TRUE	reported	textfile	2.32498e-06	3	11712287	3656	0.06183	TRUE	reported	igd	2	TRUE	0.0060841	22.3674	21.7795
	rs17037450	A	G	A	G	-0.3233	-0.0757202	0.0264	FALSE	FALSE	FALSE	aPrUet	105704536	0.12942	0.0499343	outcome	TRUE	reported	textfile	7.68104e-06	12	106098314	3656	0.07216	TRUE	reported	igd	2	TRUE	0.00546052	20.0623	21.7795
	rs187459109	A	G	A	G	-1.987	0.0270352	0.0008	FALSE	FALSE	FALSE	aPrUet	40365749	0.856264	0.149257	outcome	TRUE	reported	textfile	8.31706e-07	6	40333488	3656	0.4026	TRUE	reported	igd	2	TRUE	0.00661848	24.345	21.7795
	rs2627305	A	G	A	G	-0.1167	0.0335514	0.2986	FALSE	FALSE	FALSE	aPrUet	74246773	0.220971	0.0274124	outcome	TRUE	reported	textfile	7.14908e-06	15	74539114	3656	0.02595	TRUE	reported	igd	2	TRUE	0.0055013	20.2129	21.7795
	rs478251	C	A	C	A	0.1561	0.0189357	0.1332	FALSE	FALSE	FALSE	aPrUet	127957832	0.513477	0.0289787	outcome	TRUE	reported	textfile	5.11399e-06	11	127827727	3656	0.03419	TRUE	reported	igd	2	TRUE	0.00566934	20.8339	21.7795
	rs4785074	T	C	T	C	-0.1289	0.0190546	0.635	FALSE	FALSE	FALSE	aPrUet	59851833	0.45731	0.0256357	outcome	TRUE	reported	textfile	1.91898e-07	16	59885737	3656	0.02471	TRUE	reported	igd	2	TRUE	0.00738811	27.1971	21.7795
	rs62160934	A	T	A	T	0.1297	0.00757856	0.2133	FALSE	TRUE	TRUE	aPrUet	136183969	0.817517	0.0328447	outcome	TRUE	reported	textfile	6.13098e-06	2	136941539	3656	0.02865	TRUE	reported	igd	2	FALSE	0.00557438	20.483	21.7795
	rs6488283	G	A	G	A	-0.1069	-0.0354345	0.4229	FALSE	FALSE	FALSE	aPrUet	10344184	0.137292	0.0238464	outcome	TRUE	reported	textfile	6.50504e-06	12	10496783	3656	0.02367	TRUE	reported	igd	2	TRUE	0.005548	20.3855	21.7795
	rs6554754	C	T	C	T	0.1238	-0.0871456	0.7503	FALSE	FALSE	FALSE	aPrUet	1297143	0.00917994	0.0334496	outcome	TRUE	reported	textfile	5.91902e-06	5	1297258	3656	0.0273	TRUE	reported	igd	2	TRUE	0.00559337	20.5531	21.7795
	rs66491584	A	G	A	G	-0.1404	0.0215348	0.1991	FALSE	FALSE	FALSE	aPrUet	20938906	0.417765	0.0265762	outcome	TRUE	reported	textfile	1.97702e-06	3	20980398	3656	0.02948	TRUE	reported	igd	2	TRUE	0.00616577	22.6695	21.7795
	rs72686093	T	C	T	C	0.2941	0.110497	0.0382	FALSE	FALSE	FALSE	aPrUet	21661678	0.365921	0.122212	outcome	TRUE	reported	textfile	1.64101e-06	14	22129890	3656	0.06126	TRUE	reported	igd	2	TRUE	0.0062647	23.0355	21.7795
	rs72834736	C	G	C	G	0.3562	0.0215174	0.0248	FALSE	TRUE	TRUE	aPrUet	81787756	0.550753	0.0360648	outcome	TRUE	reported	textfile	4.11604e-06	16	81821361	3656	0.07723	TRUE	reported	igd	2	FALSE	0.00578482	21.2607	21.7795
	rs7294591	T	C	T	C	0.1168	-0.0300722	0.5412	FALSE	FALSE	FALSE	aPrUet	52538247	0.212514	0.0241218	outcome	TRUE	reported	textfile	1.086e-06	12	52932031	3656	0.02391	TRUE	reported	igd	2	TRUE	0.00648477	23.85	21.7795
	rs75346886	T	G	T	G	0.3296	-0.0342518	0.0294	FALSE	FALSE	FALSE	aPrUet	127645776	0.595961	0.0645996	outcome	TRUE	reported	textfile	2.48199e-06	7	127285830	3656	0.06986	TRUE	reported	igd	2	TRUE	0.00605166	22.2474	21.7795
	rs76348547	T	G	T	G	0.3941	-0.0401104	0.0207	FALSE	FALSE	FALSE	aPrUet	30617934	0.650362	0.088493	outcome	TRUE	reported	textfile	1.74699e-06	22	31013921	3656	0.0823	TRUE	reported	igd	2	TRUE	0.00623292	22.9179	21.7795
	rs76624801	C	A	C	A	-2.09	0.263984	0.0007	FALSE	FALSE	FALSE	aPrUet	41968059	0.335902	0.274328	outcome	TRUE	reported	textfile	3.53199e-06	6	41935797	3656	0.45	TRUE	reported	igd	2	TRUE	0.00586552	21.5591	21.7795
	rs78196740	C	T	C	T	0.192	-0.0680674	0.0929	FALSE	FALSE	FALSE	aPrUet	63337052	0.109565	0.0425381	outcome	TRUE	reported	textfile	2.59998e-06	1	63802723	3656	0.04079	TRUE	reported	igd	2	TRUE	0.00602372	22.1441	21.7795
	rs79264549	A	C	A	C	1.582	-0.231149	0.001	FALSE	FALSE	FALSE	aPrUet	90289934	0.0958959	0.138821	outcome	TRUE	reported	textfile	8.95901e-06	5	89585751	3656	0.3557	TRUE	reported	igd	2	TRUE	0.0053814	19.77	21.7795
	rs79812543	A	G	A	G	0.3801	0.0645744	0.0197	FALSE	FALSE	FALSE	aPrUet	157931715	0.504896	0.0968414	outcome	TRUE	reported	textfile	4.16198e-06	3	157649504	3656	0.08244	TRUE	reported	igd	2	TRUE	0.0057809	21.2462	21.7795
	rs970081	A	G	A	G	-0.1191	0.0390558	0.6517	FALSE	FALSE	FALSE	aPrUet	212928502	0.0998412	0.0237332	outcome	TRUE	reported	textfile	1.64801e-06	1	213101844	3656	0.02482	TRUE	reported	igd	2	TRUE	0.00625874	23.0135	21.7795
GCST90001426	rs10922490	C	T	C	T	0.516	0.00379433	0.0164	FALSE	FALSE	FALSE	vXvFcv	88820389	0.945968	0.0559872	outcome	TRUE	reported	textfile	8.15793e-07	1	89286072	3656	0.1044	TRUE	reported	igd	2	TRUE	0.00663743	24.4152	23.0091
	rs114839471	G	A	G	A	2.925	-0.209061	0.0005	FALSE	FALSE	FALSE	vXvFcv	90249218	0.133793	0.139438	outcome	TRUE	reported	textfile	6.80707e-06	5	89545035	3656	0.6491	TRUE	reported	igd	2	TRUE	0.00552353	20.2951	23.0091
	rs11653761	T	G	T	G	-0.1257	-0.00132543	0.592	FALSE	FALSE	FALSE	vXvFcv	2813241	0.955996	0.0240208	outcome	TRUE	reported	textfile	1.93201e-07	17	2716535	3656	0.02411	TRUE	reported	igd	2	TRUE	0.00737994	27.1668	23.0091
	rs11687597	G	A	G	A	0.1644	0.00841009	0.2069	FALSE	FALSE	FALSE	vXvFcv	136168576	0.798189	0.0328916	outcome	TRUE	reported	textfile	4.86004e-08	2	136926146	3656	0.03007	TRUE	reported	igd	2	TRUE	0.0081095	29.8744	23.0091
	rs118086652	G	A	G	A	0.38	0.0317059	0.0213	FALSE	FALSE	FALSE	vXvFcv	76354529	0.732354	0.0927086	outcome	TRUE	reported	textfile	4.61095e-06	15	76646870	3656	0.08281	TRUE	reported	igd	2	TRUE	0.00572666	21.0457	23.0091
	rs12298227	C	T	C	T	-0.2055	0.0296688	0.1013	FALSE	FALSE	FALSE	vXvFcv	54392630	0.371606	0.0332063	outcome	TRUE	reported	textfile	6.51193e-07	12	54786414	3656	0.04122	TRUE	reported	igd	2	TRUE	0.00675241	24.8411	23.0091
	rs134927	T	C	T	C	0.3766	-0.128543	0.0215	FALSE	FALSE	FALSE	vXvFcv	27025880	0.121516	0.0830146	outcome	TRUE	reported	textfile	5.86206e-06	22	27421843	3656	0.08299	TRUE	reported	igd	2	TRUE	0.00560097	20.5812	23.0091
	rs143785715	T	C	T	C	1.034	-0.0377167	0.0027	FALSE	FALSE	FALSE	vXvFcv	19174088	0.6295	0.0781807	outcome	TRUE	reported	textfile	4.55302e-06	1	19500582	3656	0.2251	TRUE	reported	igd	2	TRUE	0.00573832	21.0888	23.0091
	rs145744014	T	C	T	C	0.4981	0.0480073	0.0116	FALSE	FALSE	FALSE	vXvFcv	63751168	0.365934	0.0530986	outcome	TRUE	reported	textfile	6.63804e-06	18	61418402	3656	0.1104	TRUE	reported	igd	2	TRUE	0.00553704	20.345	23.0091
	rs146936090	T	C	T	C	1.843	-0.00568212	0.0008	FALSE	FALSE	FALSE	vXvFcv	41433547	0.932497	0.0670826	outcome	TRUE	reported	textfile	1.66498e-06	6	41401285	3656	0.3841	TRUE	reported	igd	2	TRUE	0.00625791	23.0104	23.0091
	rs17405603	T	A	T	A	-0.1275	-0.0259277	0.2842	FALSE	TRUE	TRUE	vXvFcv	145228777	0.319363	0.0260378	outcome	TRUE	reported	textfile	2.27898e-06	5	144608340	3656	0.02694	TRUE	reported	igd	2	FALSE	0.00608929	22.3866	23.0091
	rs1867929	A	C	A	C	0.1691	0.0351354	0.1104	FALSE	FALSE	FALSE	vXvFcv	1626553	0.38038	0.0400542	outcome	TRUE	reported	textfile	9.93002e-06	4	1628280	3656	0.03822	TRUE	reported	igd	2	TRUE	0.00532575	19.5645	23.0091
	rs2137277	G	A	G	A	0.1383	0.0132356	0.1882	FALSE	FALSE	FALSE	vXvFcv	40877143	0.645935	0.0288096	outcome	TRUE	reported	textfile	6.89096e-06	8	40734662	3656	0.03071	TRUE	reported	igd	2	TRUE	0.00551666	20.2697	23.0091
	rs2328245	T	C	T	C	0.1091	0.0129348	0.5678	FALSE	FALSE	FALSE	vXvFcv	18213783	0.628174	0.0267083	outcome	TRUE	reported	textfile	6.04004e-06	20	18194427	3656	0.02407	TRUE	reported	igd	2	TRUE	0.00558801	20.5333	23.0091
	rs500586	T	C	T	C	-0.1164	0.0449918	0.7061	FALSE	FALSE	FALSE	vXvFcv	40609537	0.0652229	0.0244026	outcome	TRUE	reported	textfile	9.54707e-06	1	41075209	3656	0.02625	TRUE	reported	igd	2	TRUE	0.00534948	19.6521	23.0091
	rs593370	T	C	T	C	-0.1218	0.0260834	0.7001	FALSE	FALSE	FALSE	vXvFcv	52629177	0.335825	0.0271012	outcome	TRUE	reported	textfile	6.31495e-06	12	53022961	3656	0.02694	TRUE	reported	igd	2	TRUE	0.00555996	20.4297	23.0091
	rs71612685	G	A	G	A	0.5092	0.0571636	0.0126	FALSE	FALSE	FALSE	vXvFcv	99358694	0.71285	0.155322	outcome	TRUE	reported	textfile	2.94002e-06	4	100279851	3656	0.1088	TRUE	reported	igd	2	TRUE	0.00595551	21.8918	23.0091
	rs72691171	T	A	T	A	0.556	-0.0690628	0.0105	FALSE	TRUE	TRUE	vXvFcv	119331297	0.464762	0.0944735	outcome	TRUE	reported	textfile	7.79902e-06	1	119873920	3656	0.1242	TRUE	reported	igd	2	FALSE	0.00545163	20.0294	23.0091
	rs72816858	C	G	C	G	0.4384	-0.0652794	0.0172	FALSE	TRUE	TRUE	vXvFcv	22652063	0.299282	0.0628912	outcome	TRUE	reported	textfile	2.24099e-06	10	22940992	3656	0.09254	TRUE	reported	igd	2	FALSE	0.00610124	22.4308	23.0091
	rs7595246	C	T	C	T	0.1571	-0.0659598	0.1893	FALSE	FALSE	FALSE	vXvFcv	237646014	0.0281093	0.0300396	outcome	TRUE	reported	textfile	2.509e-07	2	238554657	3656	0.03041	TRUE	reported	igd	2	TRUE	0.00724694	26.6736	23.0091
	rs78027513	T	G	T	G	0.2746	-0.0351087	0.0414	FALSE	FALSE	FALSE	vXvFcv	154826969	0.45561	0.0470566	outcome	TRUE	reported	textfile	4.77595e-06	7	154618679	3656	0.05995	TRUE	reported	igd	2	TRUE	0.00570599	20.9694	23.0091
	rs7840395	G	A	G	A	-0.1408	-0.0139225	0.5715	FALSE	FALSE	FALSE	vXvFcv	143910788	0.556586	0.0236809	outcome	TRUE	reported	textfile	8.25296e-09	8	144984956	3656	0.02438	TRUE	reported	igd	2	TRUE	0.0090404	33.335	23.0091
	rs9520836	G	A	G	A	0.1281	-0.0607499	0.5044	FALSE	FALSE	FALSE	vXvFcv	108304715	0.0317519	0.0282884	outcome	TRUE	reported	textfile	1.05201e-07	13	108957063	3656	0.02404	TRUE	reported	igd	2	TRUE	0.00770661	28.3786	23.0091
GCST90001427	rs11653761	T	G	T	G	-0.1169	-0.00132543	0.592	FALSE	FALSE	FALSE	YZjUD8	2813241	0.955996	0.0240208	outcome	TRUE	reported	textfile	2.77997e-06	17	2716535	3656	0.0249	TRUE	reported	igd	2	TRUE	0.00599258	22.0289	21.8141
	rs116661843	A	G	A	G	-0.2855	-0.331284	0.0387	FALSE	FALSE	FALSE	YZjUD8	178448859	0.561456	0.570511	outcome	TRUE	reported	textfile	9.94695e-06	1	178417994	3656	0.06453	TRUE	reported	igd	2	TRUE	0.00532554	19.5637	21.8141
	rs11777835	C	T	C	T	-0.1246	-0.0135802	0.5715	FALSE	FALSE	FALSE	YZjUD8	143911935	0.566319	0.0236803	outcome	TRUE	reported	textfile	6.83392e-07	8	144986103	3656	0.02505	TRUE	reported	igd	2	TRUE	0.0067218	24.7277	21.8141
	rs12128328	C	T	C	T	0.1428	0.0150177	0.2113	FALSE	FALSE	FALSE	YZjUD8	59235128	0.672097	0.03548	outcome	TRUE	reported	textfile	3.17497e-06	1	59700800	3656	0.0306	TRUE	reported	igd	2	TRUE	0.00592145	21.7659	21.8141
	rs12426629	G	C	G	C	-0.1952	0.0410785	0.0989	FALSE	TRUE	TRUE	YZjUD8	54403787	0.208874	0.0326885	outcome	TRUE	reported	textfile	4.95199e-06	12	54797571	3656	0.04268	TRUE	reported	igd	2	FALSE	0.00568888	20.9061	21.8141
	rs12624265	G	A	G	A	0.1358	-0.00272708	0.2082	FALSE	FALSE	FALSE	YZjUD8	118711026	0.925247	0.0290652	outcome	TRUE	reported	textfile	7.36902e-06	2	119468602	3656	0.03024	TRUE	reported	igd	2	TRUE	0.00548581	20.1557	21.8141
	rs12874404	G	A	G	A	0.1408	-0.0269776	0.3256	FALSE	FALSE	FALSE	YZjUD8	108341146	0.67766	0.0649035	outcome	TRUE	reported	textfile	1.378e-07	13	108993494	3656	0.02668	TRUE	reported	igd	2	TRUE	0.00756017	27.8353	21.8141
	rs12992631	T	C	T	C	-0.1296	0.00782317	0.2408	FALSE	FALSE	FALSE	YZjUD8	231448447	0.786294	0.0288544	outcome	TRUE	reported	textfile	6.93905e-06	2	232313158	3656	0.02879	TRUE	reported	igd	2	TRUE	0.00551214	20.253	21.8141
	rs144625305	T	C	T	C	0.617	-0.111705	0.0086	FALSE	FALSE	FALSE	YZjUD8	7832045	0.268912	0.101038	outcome	TRUE	reported	textfile	6.49696e-06	7	7871676	3656	0.1366	TRUE	reported	igd	2	TRUE	0.0055494	20.3907	21.8141
	rs150378941	C	G	C	G	-0.853	0.0212701	0.0045	FALSE	TRUE	TRUE	YZjUD8	132169720	0.818113	0.0924894	outcome	TRUE	reported	textfile	6.27004e-06	4	133090875	3656	0.1886	TRUE	reported	igd	2	FALSE	0.00556398	20.4445	21.8141
	rs17234595	A	G	A	G	-0.3825	-0.0567806	0.0207	FALSE	FALSE	FALSE	YZjUD8	23645597	0.331197	0.0584338	outcome	TRUE	reported	textfile	9.0261e-06	11	23667143	3656	0.08604	TRUE	reported	igd	2	TRUE	0.00537668	19.7526	21.8141
	rs17405603	T	A	T	A	-0.1322	-0.0259277	0.2842	FALSE	TRUE	TRUE	YZjUD8	145228777	0.319363	0.0260378	outcome	TRUE	reported	textfile	1.88599e-06	5	144608340	3656	0.0277	TRUE	reported	igd	2	FALSE	0.00619156	22.7649	21.8141
	rs190799514	C	T	C	T	0.391	-0.143163	0.0272	FALSE	FALSE	FALSE	YZjUD8	54708433	0.310254	0.14109	outcome	TRUE	reported	textfile	3.59104e-07	8	55620993	3656	0.07669	TRUE	reported	igd	2	TRUE	0.00705981	25.98	21.8141
	rs2084194	A	G	A	G	-0.1193	-0.0197852	0.677	FALSE	FALSE	FALSE	YZjUD8	46890046	0.406761	0.0238488	outcome	TRUE	reported	textfile	7.21905e-06	2	47117185	3656	0.02656	TRUE	reported	igd	2	TRUE	0.00548818	20.1645	21.8141
	rs34157595	C	T	C	T	-0.1195	-0.0412746	0.3155	FALSE	FALSE	FALSE	YZjUD8	51123586	0.0934458	0.0246049	outcome	TRUE	reported	textfile	9.61192e-06	17	49200947	3656	0.02696	TRUE	reported	igd	2	TRUE	0.00534518	19.6362	21.8141
	rs4474666	A	G	A	G	0.1116	-0.0143267	0.5167	FALSE	FALSE	FALSE	YZjUD8	85280056	0.54514	0.0236782	outcome	TRUE	reported	textfile	5.63404e-06	16	85313662	3656	0.02456	TRUE	reported	igd	2	TRUE	0.0056159	20.6364	21.8141
	rs4697617	A	G	A	G	0.1211	0.00796628	0.7103	FALSE	FALSE	FALSE	YZjUD8	25769493	0.771873	0.0274771	outcome	TRUE	reported	textfile	8.36508e-06	4	25771115	3656	0.02714	TRUE	reported	igd	2	TRUE	0.00541631	19.899	21.8141
	rs4756916	C	T	C	T	-0.1119	-0.0203607	0.5685	FALSE	FALSE	FALSE	YZjUD8	12522814	0.433449	0.0259933	outcome	TRUE	reported	textfile	8.39499e-06	11	12544361	3656	0.02508	TRUE	reported	igd	2	TRUE	0.00541553	19.8961	21.8141
	rs61790670	A	C	A	C	0.1517	0.0162513	0.23	FALSE	FALSE	FALSE	YZjUD8	83661536	0.600215	0.0310086	outcome	TRUE	reported	textfile	1.83802e-07	1	84127219	3656	0.02904	TRUE	reported	igd	2	TRUE	0.0074087	27.2735	21.8141
	rs6723786	G	A	G	A	0.1403	-0.0337396	0.2924	FALSE	FALSE	FALSE	YZjUD8	237641429	0.177712	0.0250324	outcome	TRUE	reported	textfile	2.84302e-07	2	238550072	3656	0.02729	TRUE	reported	igd	2	TRUE	0.00717751	26.4162	21.8141
	rs7236090	C	T	C	T	0.1163	-0.0142418	0.5922	FALSE	FALSE	FALSE	YZjUD8	63279878	0.549389	0.0237888	outcome	TRUE	reported	textfile	3.33096e-06	18	60947111	3656	0.02497	TRUE	reported	igd	2	TRUE	0.00589857	21.6813	21.8141
	rs72711540	C	G	C	G	-0.165	0.0119155	0.1325	FALSE	TRUE	TRUE	YZjUD8	185999321	0.752875	0.0378448	outcome	TRUE	reported	textfile	7.97003e-06	4	186920475	3656	0.03688	TRUE	reported	igd	2	FALSE	0.00544513	20.0055	21.8141
	rs72942964	T	C	T	C	-1.231	0.0320858	0.0021	FALSE	FALSE	FALSE	YZjUD8	133806341	0.723661	0.0907479	outcome	TRUE	reported	textfile	4.85601e-06	4	134727496	3656	0.2689	TRUE	reported	igd	2	TRUE	0.00569962	20.9458	21.8141
	rs75116337	C	T	C	T	0.3985	0.232897	0.0208	FALSE	FALSE	FALSE	YZjUD8	55002421	0.0360919	0.11112	outcome	TRUE	reported	textfile	5.99805e-06	8	55914981	3656	0.08792	TRUE	reported	igd	2	TRUE	0.00558781	20.5326	21.8141
	rs75524570	C	T	C	T	0.2178	-0.0345959	0.0673	FALSE	FALSE	FALSE	YZjUD8	192187269	0.421593	0.0430479	outcome	TRUE	reported	textfile	6.07198e-06	3	191905058	3656	0.04807	TRUE	reported	igd	2	TRUE	0.0055838	20.5178	21.8141
	rs7676571	T	C	T	C	0.1731	0.024502	0.8835	FALSE	FALSE	FALSE	YZjUD8	55680880	0.532064	0.0392122	outcome	TRUE	reported	textfile	6.40796e-06	4	56547047	3656	0.0383	TRUE	reported	igd	2	TRUE	0.00555611	20.4154	21.8141
	rs77741094	G	C	G	C	-0.5436	-0.132253	0.0126	FALSE	TRUE	TRUE	YZjUD8	40990492	0.0866483	0.07719	outcome	TRUE	reported	textfile	1.24e-06	21	42362418	3656	0.1119	TRUE	reported	igd	2	FALSE	0.00641355	23.5864	21.8141
	rs814418	T	C	T	C	0.204	-0.0549808	0.0907	FALSE	FALSE	FALSE	YZjUD8	10079243	0.271055	0.0499538	outcome	TRUE	reported	textfile	4.40099e-06	8	9936753	3656	0.04436	TRUE	reported	igd	2	TRUE	0.0057513	21.1368	21.8141
	rs9514859	C	G	C	G	0.1207	-0.0283805	0.4402	FALSE	TRUE	TRUE	YZjUD8	108492497	0.259607	0.0251752	outcome	TRUE	reported	textfile	1.43999e-06	13	109144845	3656	0.025	TRUE	reported	igd	2	FALSE	0.00633531	23.2968	21.8141
GCST90001428	rs10743163	A	G	A	G	-0.1167	-0.00798975	0.4035	FALSE	FALSE	FALSE	5awWxL	11012403	0.755802	0.0256906	outcome	TRUE	reported	textfile	4.11396e-06	11	11033950	3657	0.02529	TRUE	reported	igd	2	TRUE	0.00578892	21.2817	21.5006
	rs111854570	A	G	A	G	-0.2872	0.112441	0.0388	FALSE	FALSE	FALSE	5awWxL	8653419	0.131778	0.074606	outcome	TRUE	reported	textfile	4.40697e-06	3	8695105	3657	0.06245	TRUE	reported	igd	2	TRUE	0.00575009	21.1381	21.5006
	rs112904733	T	G	C	G	0.1953	-0.295382	0.0956	TRUE	FALSE	FALSE	5awWxL	214785153	0.336262	0.307185	outcome	TRUE	reported	textfile	3.85496e-06	1	214958496	3657	0.04221	TRUE	reported	igd	2	FALSE	0.00581988	21.3962	21.5006
	rs113530462	C	G	C	G	0.887	0.0593804	0.0038	FALSE	TRUE	TRUE	5awWxL	6707895	0.40991	0.072059	outcome	TRUE	reported	textfile	6.221e-06	20	6688542	3657	0.196	TRUE	reported	igd	2	FALSE	0.0055691	20.469	21.5006
	rs114839471	G	A	G	A	3.03	-0.209061	0.0005	FALSE	FALSE	FALSE	5awWxL	90249218	0.133793	0.139438	outcome	TRUE	reported	textfile	6.21799e-06	5	89545035	3657	0.6695	TRUE	reported	igd	2	TRUE	0.00556972	20.4714	21.5006
	rs11548656	G	A	G	A	-0.1701	0.0773301	0.1288	FALSE	FALSE	FALSE	5awWxL	81883307	0.16078	0.0551392	outcome	TRUE	reported	textfile	3.48097e-06	16	81916912	3657	0.0366	TRUE	reported	igd	2	TRUE	0.0058717	21.5878	21.5006
	rs117227598	G	C	G	C	0.651	0.0631907	0.0078	FALSE	TRUE	TRUE	5awWxL	77110406	0.524497	0.0992893	outcome	TRUE	reported	textfile	7.416e-06	15	77402748	3657	0.1451	TRUE	reported	igd	2	FALSE	0.00547417	20.1182	21.5006
	rs117541917	C	A	C	A	-0.2358	0.0742713	0.0593	FALSE	FALSE	FALSE	5awWxL	43869579	0.326025	0.075621	outcome	TRUE	reported	textfile	8.88894e-06	17	41946947	3657	0.05299	TRUE	reported	igd	2	TRUE	0.00538554	19.7907	21.5006
	rs117987395	G	T	G	T	-0.246	0.133554	0.0524	FALSE	FALSE	FALSE	5awWxL	10531327	0.184335	0.100604	outcome	TRUE	reported	textfile	8.23209e-06	10	10573290	3657	0.05509	TRUE	reported	igd	2	TRUE	0.00542298	19.9291	21.5006
	rs12118242	T	C	T	C	-0.7345	0.0682526	0.0055	FALSE	FALSE	FALSE	5awWxL	231958407	0.259864	0.0605768	outcome	TRUE	reported	textfile	7.23003e-06	1	232094153	3657	0.1635	TRUE	reported	igd	2	TRUE	0.00548824	20.1702	21.5006
	rs138919897	G	A	G	A	-1.341	-0.122105	0.0019	FALSE	FALSE	FALSE	5awWxL	107115948	0.345358	0.129399	outcome	TRUE	reported	textfile	6.05703e-06	3	106834795	3657	0.296	TRUE	reported	igd	2	TRUE	0.00558108	20.5133	21.5006
	rs143109147	C	T	C	T	-2.636	0.162026	0.0004	FALSE	FALSE	FALSE	5awWxL	39921699	0.0155375	0.0669638	outcome	TRUE	reported	textfile	9.30593e-06	1	40387371	3657	0.5937	TRUE	reported	igd	2	TRUE	0.00536163	19.7024	21.5006
	rs146267894	T	C	T	C	-0.4565	0.0546665	0.0148	FALSE	FALSE	FALSE	5awWxL	72532290	0.806194	0.22282	outcome	TRUE	reported	textfile	8.36296e-06	9	75147206	3657	0.1023	TRUE	reported	igd	2	TRUE	0.0054156	19.9018	21.5006
	rs16832731	A	G	A	G	0.1484	-0.0198932	0.1987	FALSE	FALSE	FALSE	5awWxL	136107133	0.574975	0.0354769	outcome	TRUE	reported	textfile	2.48599e-06	2	136864703	3657	0.03147	TRUE	reported	igd	2	TRUE	0.00604389	22.2247	21.5006
	rs17405749	T	C	T	C	-0.1389	0.00892189	0.2374	FALSE	FALSE	FALSE	5awWxL	145229800	0.715563	0.0244842	outcome	TRUE	reported	textfile	1.51098e-06	5	144609363	3657	0.02884	TRUE	reported	igd	2	TRUE	0.00630294	23.1834	21.5006
	rs1846398	C	A	C	A	-0.1293	-0.089922	0.7518	FALSE	FALSE	FALSE	5awWxL	56909015	0.000163099	0.0238505	outcome	TRUE	reported	textfile	8.82308e-06	12	57302799	3657	0.02904	TRUE	reported	igd	2	TRUE	0.00539176	19.8137	21.5006
	rs2397752	T	C	T	C	-0.136	0.0393063	0.248	FALSE	FALSE	FALSE	5awWxL	131185558	0.135408	0.0263251	outcome	TRUE	reported	textfile	1.41101e-06	10	132983821	3657	0.02815	TRUE	reported	igd	2	TRUE	0.0063421	23.3283	21.5006
	rs4038038	A	G	A	G	0.1177	0.00106774	0.359	FALSE	FALSE	FALSE	5awWxL	18925283	0.964704	0.0241291	outcome	TRUE	reported	textfile	3.36202e-06	13	19499423	3657	0.02529	TRUE	reported	igd	2	TRUE	0.00588797	21.648	21.5006
	rs61946381	C	A	C	A	0.321	-0.0086054	0.0305	FALSE	FALSE	FALSE	5awWxL	120905756	0.849613	0.0453843	outcome	TRUE	reported	textfile	9.93002e-06	12	121343559	3657	0.07254	TRUE	reported	igd	2	TRUE	0.00532612	19.5712	21.5006
	rs73205209	C	T	C	T	0.3323	-0.201373	0.0334	FALSE	FALSE	FALSE	5awWxL	106556392	0.250652	0.175295	outcome	TRUE	reported	textfile	2.81799e-06	3	106275239	3657	0.07083	TRUE	reported	igd	2	TRUE	0.00598267	21.9983	21.5006
	rs75273600	A	G	A	G	0.6398	0.0601091	0.0093	FALSE	FALSE	FALSE	5awWxL	125273597	0.560952	0.103382	outcome	TRUE	reported	textfile	3.46497e-07	6	125594743	3657	0.1253	TRUE	reported	igd	2	TRUE	0.00707907	26.0585	21.5006
	rs75659776	T	C	T	C	0.2621	0.0718822	0.0515	FALSE	FALSE	FALSE	5awWxL	51528307	0.0566761	0.0377175	outcome	TRUE	reported	textfile	2.73697e-06	17	49605668	3657	0.05581	TRUE	reported	igd	2	TRUE	0.00599479	22.0431	21.5006
	rs80088375	T	C	T	C	-0.3593	0.149893	0.0247	FALSE	FALSE	FALSE	5awWxL	11638162	0.0155139	0.0619352	outcome	TRUE	reported	textfile	6.50205e-06	5	11638274	3657	0.07955	TRUE	reported	igd	2	TRUE	0.00554745	20.389	21.5006
	rs80216562	A	G	A	G	-0.3698	0.0403911	0.029	FALSE	FALSE	FALSE	5awWxL	128452707	0.545156	0.0667584	outcome	TRUE	reported	textfile	3.31002e-07	11	128322602	3657	0.07231	TRUE	reported	igd	2	TRUE	0.00710096	26.1396	21.5006
	rs849133	T	C	T	C	-0.1154	-0.0257989	0.5576	FALSE	FALSE	FALSE	5awWxL	28152661	0.274102	0.0235894	outcome	TRUE	reported	textfile	9.41499e-06	7	28192280	3657	0.02601	TRUE	reported	igd	2	TRUE	0.00535395	19.674	21.5006
	rs9424499	C	G	C	G	-0.5857	-0.00798987	0.0109	FALSE	TRUE	TRUE	5awWxL	232914283	0.853092	0.0431479	outcome	TRUE	reported	textfile	2.81002e-07	1	233050029	3657	0.1138	TRUE	reported	igd	2	FALSE	0.00719129	26.4745	21.5006
GCST90001429	rs10103048	C	A	C	A	0.126	0.000923449	0.7321	FALSE	FALSE	FALSE	oVjOcO	129590035	0.969297	0.0239916	outcome	TRUE	reported	textfile	2.988e-06	8	130602281	3656	0.02692	TRUE	reported	igd	2	TRUE	0.00595649	21.8954	22.3376
	rs10821937	T	C	T	C	-0.116	0.015908	0.6458	FALSE	FALSE	FALSE	oVjOcO	61964150	0.560387	0.0273208	outcome	TRUE	reported	textfile	5.66304e-06	10	63723909	3656	0.02553	TRUE	reported	igd	2	TRUE	0.00561517	20.6337	22.3376
	rs10832409	A	G	A	G	0.1495	0.0336531	0.1722	FALSE	FALSE	FALSE	oVjOcO	15356153	0.303676	0.032718	outcome	TRUE	reported	textfile	3.73603e-06	11	15377699	3656	0.03227	TRUE	reported	igd	2	TRUE	0.00583628	21.451	22.3376
	rs11068290	T	C	T	C	0.3875	-0.0508669	0.0231	FALSE	FALSE	FALSE	oVjOcO	109790250	0.454404	0.0679954	outcome	TRUE	reported	textfile	1.08901e-06	12	110228055	3656	0.07937	TRUE	reported	igd	2	TRUE	0.00647742	23.8228	22.3376
	rs11185560	A	G	A	G	-0.2347	0.0721781	0.9375	FALSE	FALSE	FALSE	oVjOcO	190115	0.174261	0.0531254	outcome	TRUE	reported	textfile	2.95597e-06	7	190115	3656	0.05014	TRUE	reported	igd	2	TRUE	0.00595739	21.8988	22.3376
	rs11682311	C	T	C	T	-0.1278	0.0209997	0.3243	FALSE	FALSE	FALSE	oVjOcO	16283709	0.373635	0.0236035	outcome	TRUE	reported	textfile	9.105e-07	2	16464977	3656	0.02599	TRUE	reported	igd	2	TRUE	0.00657022	24.1664	22.3376
	rs117772462	A	T	A	T	-0.4644	-0.145778	0.0159	FALSE	TRUE	TRUE	oVjOcO	48751421	0.346094	0.154722	outcome	TRUE	reported	textfile	1.58599e-06	7	48791017	3656	0.09659	TRUE	reported	igd	2	FALSE	0.00628314	23.1037	22.3376
	rs13300113	T	A	T	A	0.1232	0.00677867	0.2789	FALSE	TRUE	TRUE	oVjOcO	112916314	0.799148	0.0266405	outcome	TRUE	reported	textfile	7.74908e-06	9	115678594	3656	0.02752	TRUE	reported	igd	2	FALSE	0.00545185	20.0303	22.3376
	rs140380950	C	T	C	T	-0.3597	-0.0128184	0.0368	FALSE	FALSE	FALSE	oVjOcO	104971345	0.958707	0.247576	outcome	TRUE	reported	textfile	2.067e-08	2	105587803	3656	0.06402	TRUE	reported	igd	2	TRUE	0.0085607	31.5509	22.3376
	rs17408660	G	A	G	A	-0.4731	0.0550735	0.0129	FALSE	FALSE	FALSE	oVjOcO	27031549	0.468525	0.075976	outcome	TRUE	reported	textfile	7.92501e-06	12	27184482	3656	0.1058	TRUE	reported	igd	2	TRUE	0.00543951	19.9847	22.3376
	rs1919856	G	A	G	A	0.1734	-0.0394517	0.108	FALSE	FALSE	FALSE	oVjOcO	247537604	0.464863	0.0539797	outcome	TRUE	reported	textfile	5.72506e-06	1	247700906	3656	0.03817	TRUE	reported	igd	2	TRUE	0.0056131	20.6261	22.3376
	rs2216762	C	T	C	T	-0.1525	0.0173648	0.8141	FALSE	FALSE	FALSE	oVjOcO	84725840	0.588329	0.0320823	outcome	TRUE	reported	textfile	8.88403e-07	16	84759446	3656	0.03097	TRUE	reported	igd	2	TRUE	0.00658841	24.2337	22.3376
	rs2686423	G	A	G	A	0.3352	0.0206246	0.9739	FALSE	FALSE	FALSE	oVjOcO	183477920	0.691853	0.0520376	outcome	TRUE	reported	textfile	6.66807e-06	3	183195708	3656	0.07432	TRUE	reported	igd	2	TRUE	0.00553326	20.331	22.3376
	rs2857599	A	G	A	G	-0.1653	-0.0139701	0.1722	FALSE	FALSE	FALSE	oVjOcO	31594373	0.659248	0.0316816	outcome	TRUE	reported	textfile	6.07393e-06	6	31562150	3656	0.03649	TRUE	reported	igd	2	TRUE	0.00558163	20.5097	22.3376
	rs3811315	A	T	A	T	0.1771	-0.107115	0.1157	FALSE	TRUE	TRUE	oVjOcO	22031631	0.00359211	0.0367851	outcome	TRUE	reported	textfile	2.503e-06	14	22499870	3656	0.03756	TRUE	reported	igd	2	FALSE	0.00604431	22.2202	22.3376
	rs4907205	C	T	C	T	-0.1658	0.0334016	0.1232	FALSE	FALSE	FALSE	oVjOcO	96892413	0.285068	0.0312456	outcome	TRUE	reported	textfile	9.60395e-06	2	97558150	3656	0.03741	TRUE	reported	igd	2	TRUE	0.00534393	19.6316	22.3376
	rs55708924	G	A	G	A	-0.3886	0.023382	0.0185	FALSE	FALSE	FALSE	oVjOcO	15395027	0.719479	0.0651026	outcome	TRUE	reported	textfile	8.58796e-06	21	16767346	3656	0.0872	TRUE	reported	igd	2	TRUE	0.00540274	19.8488	22.3376
	rs59879144	A	C	A	C	-0.4624	-0.133328	0.0161	FALSE	FALSE	FALSE	oVjOcO	75170669	0.158463	0.0945416	outcome	TRUE	reported	textfile	1.88599e-06	12	75564449	3656	0.09688	TRUE	reported	igd	2	TRUE	0.00619246	22.7683	22.3376
	rs60521331	A	G	A	G	0.1158	0.00805878	0.5022	FALSE	FALSE	FALSE	oVjOcO	8736587	0.732039	0.0235351	outcome	TRUE	reported	textfile	1.86299e-06	17	8639905	3656	0.02425	TRUE	reported	igd	2	TRUE	0.00619851	22.7906	22.3376
	rs75589249	T	C	T	C	-0.5382	-0.0419904	0.0107	FALSE	FALSE	FALSE	oVjOcO	43446366	0.265936	0.0377452	outcome	TRUE	reported	textfile	7.06708e-06	14	43915569	3656	0.1197	TRUE	reported	igd	2	TRUE	0.00549918	20.2051	22.3376
	rs76112278	A	G	A	G	-0.4243	-0.0834585	0.0194	FALSE	FALSE	FALSE	oVjOcO	15913446	0.379489	0.0949645	outcome	TRUE	reported	textfile	1.25901e-06	4	15915069	3656	0.08741	TRUE	reported	igd	2	TRUE	0.00640365	23.5497	22.3376
	rs76660971	A	G	A	G	-0.1368	-0.0249641	0.2299	FALSE	FALSE	FALSE	oVjOcO	18919417	0.467222	0.0343382	outcome	TRUE	reported	textfile	2.02502e-06	5	18919526	3656	0.02874	TRUE	reported	igd	2	TRUE	0.00615899	22.6444	22.3376
	rs7667070	C	T	C	T	-0.283	0.0566585	0.0361	FALSE	FALSE	FALSE	oVjOcO	38378212	0.336481	0.0589492	outcome	TRUE	reported	textfile	8.55697e-06	4	38379833	3656	0.06349	TRUE	reported	igd	2	TRUE	0.00540508	19.8575	22.3376
	rs78658073	A	G	A	G	1.792	0.204834	0.001	FALSE	FALSE	FALSE	oVjOcO	498658	0.0144208	0.0837216	outcome	TRUE	reported	textfile	1.011e-06	5	498773	3656	0.3659	TRUE	reported	igd	2	TRUE	0.00651786	23.9725	22.3376
	rs80330977	A	G	A	G	-0.2327	-0.00441336	0.0814	FALSE	FALSE	FALSE	oVjOcO	158849602	0.931804	0.051573	outcome	TRUE	reported	textfile	2.46598e-07	5	158276610	3656	0.04501	TRUE	reported	igd	2	TRUE	0.0072578	26.7139	22.3376
GCST90001430	rs10933716	T	C	T	C	-0.1262	-0.0223091	0.2486	FALSE	FALSE	FALSE	FwkcBz	194122540	0.419215	0.0276177	outcome	TRUE	reported	textfile	5.61798e-06	3	193840329	3656	0.02775	TRUE	reported	igd	2	TRUE	0.00562518	20.6707	22.0593
	rs11657531	T	C	T	C	-0.1167	-0.01976	0.4884	FALSE	FALSE	FALSE	FwkcBz	2828076	0.41702	0.024347	outcome	TRUE	reported	textfile	8.83894e-07	17	2731370	3656	0.0237	TRUE	reported	igd	2	TRUE	0.00658822	24.233	22.0593
	rs116844769	A	G	A	G	-0.2347	-0.117798	0.0662	FALSE	FALSE	FALSE	FwkcBz	65247177	0.0753217	0.0662347	outcome	TRUE	reported	textfile	2.40099e-06	14	65713895	3656	0.04969	TRUE	reported	igd	2	TRUE	0.00606513	22.2972	22.0593
	rs12516105	C	T	C	T	0.1502	-0.0205329	0.1737	FALSE	FALSE	FALSE	FwkcBz	160771873	0.446755	0.0269873	outcome	TRUE	reported	textfile	3.75301e-06	5	160198880	3656	0.03243	TRUE	reported	igd	2	TRUE	0.0058331	21.4392	22.0593
	rs12874404	G	A	G	A	0.1366	-0.0269776	0.3256	FALSE	FALSE	FALSE	FwkcBz	108341146	0.67766	0.0649035	outcome	TRUE	reported	textfile	1.89601e-07	13	108993494	3656	0.02617	TRUE	reported	igd	2	TRUE	0.00739713	27.2305	22.0593
	rs139695291	G	A	G	A	1.581	-0.0016839	0.0011	FALSE	FALSE	FALSE	FwkcBz	103867244	0.986403	0.0988072	outcome	TRUE	reported	textfile	6.69006e-06	13	104519594	3656	0.3506	TRUE	reported	igd	2	TRUE	0.00553127	20.3237	22.0593
	rs142838362	T	C	T	C	0.2463	0.11739	0.0577	FALSE	FALSE	FALSE	FwkcBz	46187052	0.196995	0.0909885	outcome	TRUE	reported	textfile	2.72101e-06	21	47606966	3656	0.05243	TRUE	reported	igd	2	TRUE	0.00599997	22.0562	22.0593
	rs143109147	C	T	C	T	2.959	0.162026	0.0004	FALSE	FALSE	FALSE	FwkcBz	39921699	0.0155375	0.0669638	outcome	TRUE	reported	textfile	4.27701e-07	1	40387371	3656	0.5843	TRUE	reported	igd	2	TRUE	0.00696588	25.6319	22.0593
	rs143518319	A	C	A	C	-0.4492	0.0798426	0.015	FALSE	FALSE	FALSE	FwkcBz	34923326	0.468004	0.110017	outcome	TRUE	reported	textfile	7.21207e-06	21	36295623	3656	0.09996	TRUE	reported	igd	2	TRUE	0.00549324	20.1832	22.0593
	rs149290264	T	C	T	C	0.6348	0.0930823	0.007	FALSE	FALSE	FALSE	FwkcBz	41618137	0.449993	0.123218	outcome	TRUE	reported	textfile	8.93902e-06	3	41659628	3656	0.1427	TRUE	reported	igd	2	TRUE	0.00538363	19.7783	22.0593
	rs1510971	A	T	A	T	-0.2012	-0.00602349	0.0826	FALSE	TRUE	TRUE	FwkcBz	118881101	0.849595	0.0317636	outcome	TRUE	reported	textfile	5.292e-06	5	118216796	3656	0.04413	TRUE	reported	igd	2	FALSE	0.00565353	20.7755	22.0593
	rs16974449	A	C	A	C	0.1233	-0.0258627	0.4851	FALSE	FALSE	FALSE	FwkcBz	84721358	0.314708	0.025724	outcome	TRUE	reported	textfile	4.77903e-07	16	84754964	3656	0.02445	TRUE	reported	igd	2	TRUE	0.00690799	25.4174	22.0593
	rs182174914	A	T	A	T	2.439	0.064616	0.0004	FALSE	TRUE	TRUE	FwkcBz	80036732	0.260459	0.0574208	outcome	TRUE	reported	textfile	9.58893e-06	3	80085882	3656	0.5502	TRUE	reported	igd	2	FALSE	0.00534624	19.6401	22.0593
	rs2291516	A	G	A	G	0.1953	-0.115902	0.0793	FALSE	FALSE	FALSE	FwkcBz	11397501	0.000994581	0.0352067	outcome	TRUE	reported	textfile	9.56996e-06	19	11508177	3656	0.04406	TRUE	reported	igd	2	TRUE	0.00534542	19.6371	22.0593
	rs28399382	T	C	T	C	0.1411	0.00676452	0.1982	FALSE	FALSE	FALSE	FwkcBz	115674391	0.851036	0.0360203	outcome	TRUE	reported	textfile	4.74395e-06	3	115393238	3656	0.0308	TRUE	reported	igd	2	TRUE	0.00570769	20.9756	22.0593
	rs28654727	A	C	A	C	0.1272	0.0608674	0.2433	FALSE	FALSE	FALSE	FwkcBz	60766136	0.0169504	0.0254912	outcome	TRUE	reported	textfile	7.89405e-06	4	61631854	3656	0.02842	TRUE	reported	igd	2	TRUE	0.00544938	20.0211	22.0593
	rs34910780	T	A	T	A	-0.2544	0.128797	0.048	FALSE	TRUE	TRUE	FwkcBz	77840371	0.174448	0.0948398	outcome	TRUE	reported	textfile	7.26106e-06	7	77469688	3656	0.05663	TRUE	reported	igd	2	FALSE	0.00548964	20.1699	22.0593
	rs4361609	C	G	C	G	-0.1912	0.0321917	0.1131	FALSE	TRUE	TRUE	FwkcBz	31272858	0.252459	0.0281298	outcome	TRUE	reported	textfile	7.92501e-06	6	31240635	3656	0.04275	TRUE	reported	igd	2	FALSE	0.00544161	19.9924	22.0593
	rs4716961	C	T	C	T	-0.3385	-0.0113718	0.0265	FALSE	FALSE	FALSE	FwkcBz	155431439	0.820622	0.0501521	outcome	TRUE	reported	textfile	5.96898e-06	7	155224134	3656	0.07465	TRUE	reported	igd	2	TRUE	0.00559263	20.5504	22.0593
	rs55708924	G	A	G	A	-0.4222	0.023382	0.0185	FALSE	FALSE	FALSE	FwkcBz	15395027	0.719479	0.0651026	outcome	TRUE	reported	textfile	1.39801e-06	21	16767346	3656	0.08736	TRUE	reported	igd	2	TRUE	0.00634804	23.3439	22.0593
	rs55877424	A	G	A	G	0.1449	0.00622892	0.1607	FALSE	FALSE	FALSE	FwkcBz	12103683	0.852006	0.0333884	outcome	TRUE	reported	textfile	9.68902e-06	2	12243809	3656	0.0327	TRUE	reported	igd	2	TRUE	0.00534206	19.6247	22.0593
	rs60521331	A	G	A	G	0.1214	0.00805878	0.5022	FALSE	FALSE	FALSE	FwkcBz	8736587	0.732039	0.0235351	outcome	TRUE	reported	textfile	6.26095e-07	17	8639905	3656	0.02433	TRUE	reported	igd	2	TRUE	0.00676394	24.8837	22.0593
	rs60953943	A	G	A	G	-0.4228	0.0396453	0.0204	FALSE	FALSE	FALSE	FwkcBz	59164686	0.810599	0.165428	outcome	TRUE	reported	textfile	1.91298e-06	8	60077245	3656	0.08863	TRUE	reported	igd	2	TRUE	0.00618596	22.7442	22.0593
	rs6131010	G	A	G	A	-0.1184	0.0798304	0.6172	FALSE	FALSE	FALSE	FwkcBz	46095666	0.00201916	0.0258568	outcome	TRUE	reported	textfile	4.94698e-06	20	44724305	3656	0.02588	TRUE	reported	igd	2	TRUE	0.00569232	20.9188	22.0593
	rs62474511	T	A	T	A	0.2018	0.0354054	0.0927	FALSE	TRUE	TRUE	FwkcBz	123635430	0.302866	0.034364	outcome	TRUE	reported	textfile	1.417e-06	7	123275484	3656	0.04179	TRUE	reported	igd	2	FALSE	0.00633768	23.3056	22.0593
	rs655580	A	G	A	G	0.1258	-0.0167036	0.4571	FALSE	FALSE	FALSE	FwkcBz	52535857	0.500865	0.0248148	outcome	TRUE	reported	textfile	2.18902e-07	19	53039110	3656	0.02423	TRUE	reported	igd	2	TRUE	0.0073191	26.9412	22.0593
	rs6831487	G	T	G	T	0.1165	-0.00731407	0.4702	FALSE	FALSE	FALSE	FwkcBz	169410821	0.779471	0.0261209	outcome	TRUE	reported	textfile	2.42298e-06	4	170331972	3656	0.02467	TRUE	reported	igd	2	TRUE	0.0060627	22.2882	22.0593
	rs74151247	A	C	A	C	0.348	-0.184062	0.0302	FALSE	FALSE	FALSE	FwkcBz	96041316	0.0612167	0.0983274	outcome	TRUE	reported	textfile	1.09199e-06	10	97801073	3656	0.07127	TRUE	reported	igd	2	TRUE	0.00647912	23.8291	22.0593
	rs75319860	C	T	C	T	0.3651	0.00424325	0.0249	FALSE	FALSE	FALSE	FwkcBz	109874424	0.966086	0.0997986	outcome	TRUE	reported	textfile	3.91201e-06	12	110312229	3656	0.07896	TRUE	reported	igd	2	TRUE	0.00581394	21.3684	22.0593
	rs75474045	A	G	A	G	0.503	-0.179957	0.0126	FALSE	FALSE	FALSE	FwkcBz	71854164	0.0298992	0.0828753	outcome	TRUE	reported	textfile	3.125e-06	13	72428296	3656	0.1077	TRUE	reported	igd	2	TRUE	0.00593082	21.8005	22.0593
	rs75512885	A	T	A	T	-0.2112	-0.00422051	0.0788	FALSE	TRUE	TRUE	FwkcBz	158890594	0.934769	0.0515665	outcome	TRUE	reported	textfile	5.32304e-06	5	158317602	3656	0.04633	TRUE	reported	igd	2	FALSE	0.00565191	20.7695	22.0593
	rs76400856	C	A	C	A	0.2233	-0.0622434	0.0639	FALSE	FALSE	FALSE	FwkcBz	54879116	0.165844	0.044919	outcome	TRUE	reported	textfile	4.30299e-06	10	56638876	3656	0.0485	TRUE	reported	igd	2	TRUE	0.0057647	21.1864	22.0593
	rs7840067	C	T	C	T	-0.1537	-0.00216618	0.1978	FALSE	FALSE	FALSE	FwkcBz	129570541	0.938156	0.0279192	outcome	TRUE	reported	textfile	3.95704e-07	8	130582787	3656	0.03026	TRUE	reported	igd	2	TRUE	0.00700728	25.7853	22.0593
	rs9459562	C	G	C	G	0.1106	-0.00994279	0.4346	FALSE	TRUE	TRUE	FwkcBz	166088560	0.693637	0.0252404	outcome	TRUE	reported	textfile	7.11607e-06	6	166502048	3656	0.0246	TRUE	reported	igd	2	FALSE	0.00549844	20.2024	22.0593
GCST90001431	rs10444793	A	G	A	G	-0.4323	-0.211105	0.0181	FALSE	FALSE	FALSE	OhlMMq	44225491	0.0248691	0.0940991	outcome	TRUE	reported	textfile	2.88602e-06	15	44517689	3656	0.09225	TRUE	reported	igd	2	TRUE	0.00597077	21.9483	23.3043
	rs112782756	G	A	G	A	3.09	-0.101824	0.0003	FALSE	FALSE	FALSE	OhlMMq	33931936	0.298373	0.0979147	outcome	TRUE	reported	textfile	6.25101e-06	13	34506073	3656	0.683	TRUE	reported	igd	2	TRUE	0.0055673	20.4568	23.3043
	rs12146653	C	T	C	T	0.1892	-0.0685727	0.0964	FALSE	FALSE	FALSE	OhlMMq	21390345	0.0997769	0.0416619	outcome	TRUE	reported	textfile	4.66305e-06	11	21411891	3656	0.04126	TRUE	reported	igd	2	TRUE	0.00571856	21.0158	23.3043
	rs12197754	C	T	C	T	-0.1427	0.00882606	0.2014	FALSE	FALSE	FALSE	OhlMMq	130199925	0.732794	0.0258517	outcome	TRUE	reported	textfile	4.74996e-06	6	130521070	3656	0.03115	TRUE	reported	igd	2	TRUE	0.00570742	20.9746	23.3043
	rs12763172	C	T	C	T	0.1272	-0.0362088	0.7213	FALSE	FALSE	FALSE	OhlMMq	83687763	0.123533	0.0235105	outcome	TRUE	reported	textfile	5.05196e-06	10	85447519	3656	0.02784	TRUE	reported	igd	2	TRUE	0.0056775	20.864	23.3043
	rs12829274	G	A	G	A	-0.2515	0.076157	0.0618	FALSE	FALSE	FALSE	OhlMMq	128864622	0.0989077	0.0461508	outcome	TRUE	reported	textfile	1.33999e-06	12	129349167	3656	0.05194	TRUE	reported	igd	2	TRUE	0.0063722	23.4334	23.3043
	rs12874404	G	A	G	A	0.1714	-0.0269776	0.3256	FALSE	FALSE	FALSE	OhlMMq	108341146	0.67766	0.0649035	outcome	TRUE	reported	textfile	1.385e-10	13	108993494	3656	0.02663	TRUE	reported	igd	2	TRUE	0.0112042	41.4039	23.3043
	rs144625305	T	C	T	C	0.6141	-0.111705	0.0086	FALSE	FALSE	FALSE	OhlMMq	7832045	0.268912	0.101038	outcome	TRUE	reported	textfile	6.89795e-06	7	7871676	3656	0.1364	TRUE	reported	igd	2	TRUE	0.00551369	20.2587	23.3043
	rs149701635	G	C	G	C	-0.3548	-0.143598	0.0263	FALSE	TRUE	TRUE	OhlMMq	44699591	0.283034	0.133762	outcome	TRUE	reported	textfile	5.08101e-06	3	44741083	3656	0.07767	TRUE	reported	igd	2	FALSE	0.00567522	20.8556	23.3043
	rs149731447	T	C	T	C	-0.9621	0.160236	0.0036	FALSE	FALSE	FALSE	OhlMMq	52070230	0.290373	0.151551	outcome	TRUE	reported	textfile	8.35699e-06	14	52536948	3656	0.2156	TRUE	reported	igd	2	TRUE	0.00541723	19.9024	23.3043
	rs2003291	T	C	T	C	-0.1589	-0.00493811	0.1413	FALSE	FALSE	FALSE	OhlMMq	20992784	0.864035	0.0288373	outcome	TRUE	reported	textfile	8.76597e-06	13	21566923	3656	0.0357	TRUE	reported	igd	2	TRUE	0.00538962	19.8004	23.3043
	rs28594458	G	C	G	C	-0.1135	-0.0165152	0.4918	FALSE	TRUE	TRUE	OhlMMq	2825483	0.492859	0.0240829	outcome	TRUE	reported	textfile	2.76599e-06	17	2728777	3656	0.02418	TRUE	reported	igd	2	FALSE	0.00599051	22.0212	23.3043
	rs35088452	A	C	A	C	-0.1352	-0.032518	0.7471	FALSE	FALSE	FALSE	OhlMMq	8805797	0.196832	0.0251954	outcome	TRUE	reported	textfile	2.15899e-06	3	8847483	3656	0.02849	TRUE	reported	igd	2	TRUE	0.00612203	22.5077	23.3043
	rs3730631	C	T	C	T	-0.1789	-0.0252454	0.1288	FALSE	FALSE	FALSE	OhlMMq	68834398	0.808836	0.104351	outcome	TRUE	reported	textfile	1.66399e-06	12	69228178	3656	0.03729	TRUE	reported	igd	2	TRUE	0.00625611	23.0037	23.3043
	rs62235484	A	G	A	G	0.4662	0.0383474	0.0175	FALSE	FALSE	FALSE	OhlMMq	39711123	0.452232	0.0510143	outcome	TRUE	reported	textfile	7.13608e-07	21	41083050	3656	0.09386	TRUE	reported	igd	2	TRUE	0.0067028	24.6573	23.3043
	rs6895553	C	T	C	T	-0.199	0.000499988	0.0946	FALSE	FALSE	FALSE	OhlMMq	115485970	0.991233	0.0455027	outcome	TRUE	reported	textfile	3.304e-06	5	114821667	3656	0.04272	TRUE	reported	igd	2	TRUE	0.00590021	21.6873	23.3043
	rs72706301	A	G	A	G	0.448	-0.0252879	0.0179	FALSE	FALSE	FALSE	OhlMMq	94385882	0.785907	0.0930969	outcome	TRUE	reported	textfile	1.98299e-06	14	94852219	3656	0.09406	TRUE	reported	igd	2	TRUE	0.00616671	22.673	23.3043
	rs77055472	A	T	A	T	-0.2682	-0.0425395	0.0495	FALSE	TRUE	TRUE	OhlMMq	158228983	0.613594	0.0842448	outcome	TRUE	reported	textfile	3.36001e-06	5	157655991	3656	0.05762	TRUE	reported	igd	2	FALSE	0.00589113	21.6538	23.3043
	rs77762131	C	G	C	G	0.3532	0.137884	0.045	FALSE	TRUE	TRUE	OhlMMq	95739501	0.3189	0.138337	outcome	TRUE	reported	textfile	1.24701e-09	14	96205838	3656	0.058	TRUE	reported	igd	2	FALSE	0.0100414	37.0636	23.3043
	rs78007261	T	C	T	C	-0.3003	-0.0515637	0.0379	FALSE	FALSE	FALSE	OhlMMq	45270636	0.733505	0.15145	outcome	TRUE	reported	textfile	4.80895e-06	22	45666517	3656	0.06556	TRUE	reported	igd	2	TRUE	0.00570613	20.9698	23.3043
	rs78009119	G	T	G	T	-0.5085	-0.32814	0.0137	FALSE	FALSE	FALSE	OhlMMq	137085809	0.198759	0.255343	outcome	TRUE	reported	textfile	2.49902e-06	5	136421498	3656	0.1078	TRUE	reported	igd	2	TRUE	0.00604927	22.2386	23.3043
GCST90001432	rs10119513	A	G	A	G	0.3622	0.0355205	0.9784	FALSE	FALSE	FALSE	DWg0vV	16899528	0.680899	0.0863751	outcome	TRUE	reported	textfile	9.91197e-06	9	16899526	3656	0.08185	TRUE	reported	igd	2	TRUE	0.00532762	19.5714	24.9856
	rs10840410	C	T	C	T	-0.1182	-0.00408128	0.3087	FALSE	FALSE	FALSE	DWg0vV	10415549	0.877939	0.0265739	outcome	TRUE	reported	textfile	7.88206e-06	11	10437096	3656	0.02642	TRUE	reported	igd	2	TRUE	0.00544493	20.0047	24.9856
	rs10894530	A	C	A	C	-0.1638	-0.0723292	0.1296	FALSE	FALSE	FALSE	DWg0vV	132289565	0.0118024	0.0287249	outcome	TRUE	reported	textfile	9.00409e-06	11	132159459	3656	0.03684	TRUE	reported	igd	2	TRUE	0.00537824	19.7584	24.9856
	rs112135308	G	C	G	C	0.416	0.0281227	0.0174	FALSE	TRUE	TRUE	DWg0vV	86760857	0.645167	0.0610717	outcome	TRUE	reported	textfile	2.57099e-06	16	86794463	3656	0.08833	TRUE	reported	igd	2	FALSE	0.00603028	22.1683	24.9856
	rs11657759	C	A	C	A	-0.1271	-0.00795813	0.4903	FALSE	FALSE	FALSE	DWg0vV	2812667	0.739648	0.0239472	outcome	TRUE	reported	textfile	1.16099e-07	17	2715961	3656	0.02394	TRUE	reported	igd	2	TRUE	0.0076507	28.1712	24.9856
	rs11794578	G	T	G	T	0.1189	-0.00443593	0.4521	FALSE	FALSE	FALSE	DWg0vV	808529	0.85181	0.0237457	outcome	TRUE	reported	textfile	1.12101e-06	9	808529	3656	0.02437	TRUE	reported	igd	2	TRUE	0.00646886	23.7911	24.9856
	rs12829274	G	A	G	A	-0.2536	0.076157	0.0618	FALSE	FALSE	FALSE	DWg0vV	128864622	0.0989077	0.0461508	outcome	TRUE	reported	textfile	7.30601e-07	12	129349167	3656	0.0511	TRUE	reported	igd	2	TRUE	0.00669167	24.6161	24.9856
	rs12874404	G	A	G	A	0.1827	-0.0269776	0.3256	FALSE	FALSE	FALSE	DWg0vV	108341146	0.67766	0.0649035	outcome	TRUE	reported	textfile	4.02346e-12	13	108993494	3656	0.02625	TRUE	reported	igd	2	TRUE	0.0130766	48.4151	24.9856
	rs141247883	G	A	G	A	-0.3185	-0.15151	0.0319	FALSE	FALSE	FALSE	DWg0vV	143911903	0.652043	0.335997	outcome	TRUE	reported	textfile	3.34503e-06	8	144986071	3656	0.06842	TRUE	reported	igd	2	TRUE	0.00589223	21.6578	24.9856
	rs143553941	C	G	C	G	0.501	0.0805348	0.013	FALSE	TRUE	TRUE	DWg0vV	108974343	0.418795	0.0996084	outcome	TRUE	reported	textfile	2.95801e-06	12	109368119	3656	0.107	TRUE	reported	igd	2	FALSE	0.00596081	21.9114	24.9856
	rs144625305	T	C	T	C	0.5993	-0.111705	0.0086	FALSE	FALSE	FALSE	DWg0vV	7832045	0.268912	0.101038	outcome	TRUE	reported	textfile	8.30004e-06	7	7871676	3656	0.1343	TRUE	reported	igd	2	TRUE	0.00541716	19.9021	24.9856
	rs2956955	C	T	C	T	-0.3254	0.258042	0.9661	FALSE	FALSE	FALSE	DWg0vV	1604371	0.0709823	0.142912	outcome	TRUE	reported	textfile	1.47099e-06	8	1552537	3656	0.06746	TRUE	reported	igd	2	TRUE	0.00632384	23.2544	24.9856
	rs557577736	G	A	G	A	1.799	0.174798	0.001	FALSE	FALSE	FALSE	DWg0vV	45649957	0.244948	0.150337	outcome	TRUE	reported	textfile	2.857e-06	13	46224092	3656	0.3838	TRUE	reported	igd	2	TRUE	0.00597371	21.9591	24.9856
	rs57757402	G	A	G	A	-0.1601	-0.00175606	0.1435	FALSE	FALSE	FALSE	DWg0vV	37390414	0.94903	0.0274707	outcome	TRUE	reported	textfile	5.67806e-06	9	37390411	3656	0.03523	TRUE	reported	igd	2	TRUE	0.00561701	20.6405	24.9856
	rs6032660	A	G	A	G	-0.1525	0.071631	0.6359	FALSE	FALSE	FALSE	DWg0vV	46101606	0.006187	0.0261647	outcome	TRUE	reported	textfile	7.19797e-09	20	44730245	3656	0.02629	TRUE	reported	igd	2	TRUE	0.00911955	33.6295	24.9856
	rs6557137	T	C	T	C	-0.1494	-0.0776132	0.1838	FALSE	FALSE	FALSE	DWg0vV	149875886	0.0162394	0.0322918	outcome	TRUE	reported	textfile	3.62001e-06	6	150197022	3656	0.03221	TRUE	reported	igd	2	TRUE	0.00585013	21.5022	24.9856
	rs7254039	A	G	A	G	-0.2695	0.029214	0.0435	FALSE	FALSE	FALSE	DWg0vV	14882542	0.571787	0.0516677	outcome	TRUE	reported	textfile	3.20797e-06	19	14993354	3656	0.05778	TRUE	reported	igd	2	TRUE	0.00591534	21.7433	24.9856
	rs73192651	T	C	T	C	0.5455	0.0700385	0.02	FALSE	FALSE	FALSE	DWg0vV	49638749	0.446182	0.0919388	outcome	TRUE	reported	textfile	6.53597e-10	13	50212885	3656	0.08807	TRUE	reported	igd	2	TRUE	0.0103847	38.3439	24.9856
	rs75766272	T	C	T	C	-0.3961	-0.0296118	0.0201	FALSE	FALSE	FALSE	DWg0vV	7949925	0.521078	0.046147	outcome	TRUE	reported	textfile	3.51901e-06	1	8009985	3656	0.08527	TRUE	reported	igd	2	TRUE	0.00586753	21.5665	24.9856
	rs76762356	G	A	G	A	-0.3702	-0.00508917	0.0228	FALSE	FALSE	FALSE	DWg0vV	10473432	0.901203	0.0409949	outcome	TRUE	reported	textfile	7.91699e-06	20	10454080	3656	0.08274	TRUE	reported	igd	2	TRUE	0.00544583	20.008	24.9856
	rs77762131	C	G	C	G	0.3287	0.137884	0.045	FALSE	TRUE	TRUE	DWg0vV	95739501	0.3189	0.138337	outcome	TRUE	reported	textfile	8.74903e-09	14	96205838	3656	0.05701	TRUE	reported	igd	2	FALSE	0.00901073	33.2246	24.9856
	rs8014978	C	T	C	T	-0.1203	-0.0413941	0.5737	FALSE	FALSE	FALSE	DWg0vV	94470627	0.0864789	0.0241467	outcome	TRUE	reported	textfile	1.08201e-06	14	94936964	3656	0.02463	TRUE	reported	igd	2	TRUE	0.00648293	23.8432	24.9856
GCST90001433	rs111407982	T	C	T	C	-0.1612	0.051775	0.1551	FALSE	FALSE	FALSE	3XxzZG	8704019	0.0600689	0.0275357	outcome	TRUE	reported	textfile	1.87499e-06	19	8814367	3656	0.03377	TRUE	reported	igd	2	TRUE	0.00619389	22.7735	29.8547
	rs113442137	A	G	A	G	-0.2734	-0.0351587	0.0472	FALSE	FALSE	FALSE	3XxzZG	160285165	0.408239	0.0425138	outcome	TRUE	reported	textfile	1.97301e-06	1	160254955	3656	0.0574	TRUE	reported	igd	2	TRUE	0.00616709	22.6744	29.8547
	rs12654363	T	C	T	C	-0.2241	0.00898077	0.9301	FALSE	FALSE	FALSE	3XxzZG	84768324	0.819868	0.0394386	outcome	TRUE	reported	textfile	3.31398e-06	5	84064142	3656	0.04812	TRUE	reported	igd	2	TRUE	0.00589736	21.6768	29.8547
	rs185621536	T	C	T	C	-0.3248	-0.0679277	0.0312	FALSE	FALSE	FALSE	3XxzZG	112981879	0.371551	0.0760183	outcome	TRUE	reported	textfile	3.79997e-06	1	113524501	3656	0.07016	TRUE	reported	igd	2	TRUE	0.00582785	21.4198	29.8547
	rs191610741	T	C	T	C	-0.3731	-0.0328598	0.0257	FALSE	FALSE	FALSE	3XxzZG	4201114	0.75789	0.1066	outcome	TRUE	reported	textfile	4.87304e-06	6	4201348	3656	0.08152	TRUE	reported	igd	2	TRUE	0.00569685	20.9356	29.8547
	rs1978170	G	A	G	A	-0.113	0.0523237	0.6033	FALSE	FALSE	FALSE	3XxzZG	38717809	0.0440941	0.0259903	outcome	TRUE	reported	textfile	9.38793e-06	7	38757409	3656	0.02548	TRUE	reported	igd	2	TRUE	0.00535084	19.6571	29.8547
	rs2250246	G	A	G	A	0.1325	0.0249801	0.5341	FALSE	FALSE	FALSE	3XxzZG	6443850	0.303163	0.0242602	outcome	TRUE	reported	textfile	7.13296e-08	12	6553016	3656	0.02454	TRUE	reported	igd	2	TRUE	0.00791092	29.137	29.8547
	rs2789568	C	T	C	T	-0.2462	0.0416664	0.0706	FALSE	FALSE	FALSE	3XxzZG	217005696	0.18729	0.031598	outcome	TRUE	reported	textfile	3.32897e-07	1	217179038	3656	0.04816	TRUE	reported	igd	2	TRUE	0.00709747	26.1195	29.8547
	rs35574803	C	T	C	T	-0.3044	-0.0818995	0.0562	FALSE	FALSE	FALSE	3XxzZG	32491754	0.482266	0.116556	outcome	TRUE	reported	textfile	1.83101e-08	3	32533246	3656	0.05397	TRUE	reported	igd	2	TRUE	0.00862612	31.7941	29.8547
	rs4810485	G	T	G	T	0.317	0.0708584	0.6313	FALSE	FALSE	FALSE	3XxzZG	46119308	0.00696819	0.0262597	outcome	TRUE	reported	textfile	4.97966e-33	20	44747947	3656	0.02622	TRUE	reported	igd	2	TRUE	0.0384434	146.088	29.8547
	rs4941188	A	G	A	G	-0.1285	0.0156581	0.6726	FALSE	FALSE	FALSE	3XxzZG	63189796	0.521705	0.0244383	outcome	TRUE	reported	textfile	1.20401e-06	18	60857029	3656	0.02642	TRUE	reported	igd	2	TRUE	0.00642885	23.643	29.8547
	rs7260348	C	T	C	T	-0.2227	0.0196254	0.0722	FALSE	FALSE	FALSE	3XxzZG	14900630	0.690232	0.0492432	outcome	TRUE	reported	textfile	2.49799e-06	19	15011442	3656	0.04722	TRUE	reported	igd	2	TRUE	0.00604711	22.2306	29.8547
	rs7606024	A	T	A	T	-0.1469	0.0104965	0.7882	FALSE	TRUE	TRUE	3XxzZG	56389460	0.791292	0.0396647	outcome	TRUE	reported	textfile	1.42498e-06	2	56616595	3656	0.03041	TRUE	reported	igd	2	FALSE	0.00634222	23.3224	29.8547
	rs77114347	T	A	T	A	-0.239	-0.0185272	0.0543	FALSE	TRUE	TRUE	3XxzZG	7402767	0.689415	0.0463586	outcome	TRUE	reported	textfile	8.41608e-06	16	7452768	3656	0.05358	TRUE	reported	igd	2	FALSE	0.00541286	19.8862	29.8547
	rs77126700	C	T	C	T	0.3695	-0.21381	0.0239	FALSE	FALSE	FALSE	3XxzZG	48697349	0.0767149	0.120792	outcome	TRUE	reported	textfile	4.22698e-06	20	47313887	3656	0.08021	TRUE	reported	igd	2	TRUE	0.00577101	21.2097	29.8547
	rs78756830	C	T	C	T	0.4221	-0.0245445	0.0194	FALSE	FALSE	FALSE	3XxzZG	98516059	0.866405	0.145902	outcome	TRUE	reported	textfile	1.45301e-06	4	99437210	3656	0.08746	TRUE	reported	igd	2	TRUE	0.00633064	23.2795	29.8547
	rs78763642	A	G	A	G	-0.3442	0.0359945	0.0279	FALSE	FALSE	FALSE	3XxzZG	25294310	0.347521	0.0383162	outcome	TRUE	reported	textfile	3.96798e-06	9	25294308	3656	0.07449	TRUE	reported	igd	2	TRUE	0.00580618	21.3397	29.8547
	rs807894	G	T	G	T	0.114	0.0315717	0.5868	FALSE	FALSE	FALSE	3XxzZG	164189855	0.19713	0.0244785	outcome	TRUE	reported	textfile	7.13198e-06	6	164610887	3656	0.02536	TRUE	reported	igd	2	TRUE	0.00549682	20.1964	29.8547
GCST90001434	rs11653761	T	G	T	G	-0.1491	-0.00132543	0.592	FALSE	FALSE	FALSE	t1HyCi	2813241	0.955996	0.0240208	outcome	TRUE	reported	textfile	2.298e-09	17	2716535	3656	0.02489	TRUE	reported	igd	2	TRUE	0.0097198	35.8648	24.5831
	rs117231919	T	C	T	C	0.17	0.0106842	0.1219	FALSE	FALSE	FALSE	t1HyCi	652628	0.814598	0.0455621	outcome	TRUE	reported	textfile	6.95296e-06	19	652628	3656	0.03776	TRUE	reported	igd	2	TRUE	0.00551349	20.258	24.5831
	rs118076634	T	C	T	C	1.115	0.0324283	0.0025	FALSE	FALSE	FALSE	t1HyCi	94856775	0.558565	0.0554354	outcome	TRUE	reported	textfile	1.083e-06	11	94589940	3656	0.2283	TRUE	reported	igd	2	TRUE	0.00648198	23.8397	24.5831
	rs12426629	G	C	G	C	-0.2182	0.0410785	0.0989	FALSE	TRUE	TRUE	t1HyCi	54403787	0.208874	0.0326885	outcome	TRUE	reported	textfile	4.52397e-07	12	54797571	3656	0.04316	TRUE	reported	igd	2	FALSE	0.00694248	25.5452	24.5831
	rs138728953	A	C	A	C	0.311	0.0422928	0.0319	FALSE	FALSE	FALSE	t1HyCi	14587604	0.435761	0.0542653	outcome	TRUE	reported	textfile	8.77708e-06	19	14698416	3656	0.06986	TRUE	reported	igd	2	TRUE	0.0053915	19.8073	24.5831
	rs145744014	T	C	T	C	0.5148	0.0480073	0.0116	FALSE	FALSE	FALSE	t1HyCi	63751168	0.365934	0.0530986	outcome	TRUE	reported	textfile	6.92293e-06	18	61418402	3656	0.1143	TRUE	reported	igd	2	TRUE	0.00551792	20.2744	24.5831
	rs1519526	C	T	C	T	0.1674	0.0105611	0.1957	FALSE	FALSE	FALSE	t1HyCi	136209826	0.748419	0.0329288	outcome	TRUE	reported	textfile	1.341e-07	2	136967396	3656	0.03168	TRUE	reported	igd	2	TRUE	0.00757932	27.9063	24.5831
	rs17029267	T	C	T	C	0.3178	0.000658025	0.03	FALSE	FALSE	FALSE	t1HyCi	99651589	0.991626	0.0626944	outcome	TRUE	reported	textfile	7.56397e-06	4	100572746	3656	0.07088	TRUE	reported	igd	2	TRUE	0.00546856	20.092	24.5831
	rs17405603	T	A	T	A	-0.1343	-0.0259277	0.2842	FALSE	TRUE	TRUE	t1HyCi	145228777	0.319363	0.0260378	outcome	TRUE	reported	textfile	1.44202e-06	5	144608340	3656	0.02781	TRUE	reported	igd	2	FALSE	0.00633844	23.3084	24.5831
	rs190799514	C	T	C	T	0.3656	-0.143163	0.0272	FALSE	FALSE	FALSE	t1HyCi	54708433	0.310254	0.14109	outcome	TRUE	reported	textfile	2.20298e-06	8	55620993	3656	0.07711	TRUE	reported	igd	2	TRUE	0.00611115	22.4674	24.5831
	rs377621503	T	C	T	C	-0.7635	-0.067338	0.0049	FALSE	FALSE	FALSE	t1HyCi	645485	0.775665	0.236297	outcome	TRUE	reported	textfile	8.80299e-06	19	645485	3656	0.1715	TRUE	reported	igd	2	TRUE	0.00539182	19.8085	24.5831
	rs62382785	A	G	A	G	0.1313	0.0300565	0.2492	FALSE	FALSE	FALSE	t1HyCi	166154561	0.358577	0.0327385	outcome	TRUE	reported	textfile	6.22702e-06	5	165581566	3656	0.02902	TRUE	reported	igd	2	TRUE	0.00556805	20.4596	24.5831
	rs726449	T	C	T	C	0.1133	-0.0331696	0.4387	FALSE	FALSE	FALSE	t1HyCi	108499141	0.188073	0.0251991	outcome	TRUE	reported	textfile	6.35902e-06	13	109151489	3656	0.02505	TRUE	reported	igd	2	TRUE	0.00556436	20.4459	24.5831
	rs7595246	C	T	C	T	0.1684	-0.0659598	0.1893	FALSE	FALSE	FALSE	t1HyCi	237646014	0.0281093	0.0300396	outcome	TRUE	reported	textfile	8.91908e-08	2	238554657	3656	0.03143	TRUE	reported	igd	2	TRUE	0.00779099	28.6918	24.5831
	rs7640978	T	C	T	C	0.1649	0.0662013	0.1493	FALSE	FALSE	FALSE	t1HyCi	32491518	0.126704	0.0433474	outcome	TRUE	reported	textfile	3.535e-06	3	32533010	3656	0.0355	TRUE	reported	igd	2	TRUE	0.00586709	21.5649	24.5831
	rs7840395	G	A	G	A	-0.1437	-0.0139225	0.5715	FALSE	FALSE	FALSE	t1HyCi	143910788	0.556586	0.0236809	outcome	TRUE	reported	textfile	1.21099e-08	8	144984956	3656	0.02516	TRUE	reported	igd	2	TRUE	0.00884358	32.6028	24.5831
	rs814418	T	C	T	C	0.199	-0.0549808	0.0907	FALSE	FALSE	FALSE	t1HyCi	10079243	0.271055	0.0499538	outcome	TRUE	reported	textfile	9.6801e-06	8	9936753	3656	0.04491	TRUE	reported	igd	2	TRUE	0.0053418	19.6238	24.5831
	rs9520836	G	A	G	A	0.1567	-0.0607499	0.5044	FALSE	FALSE	FALSE	t1HyCi	108304715	0.0317519	0.0282884	outcome	TRUE	reported	textfile	2.91199e-10	13	108957063	3656	0.02479	TRUE	reported	igd	2	TRUE	0.0108108	39.9344	24.5831
GCST90001435	rs10849436	A	G	A	G	0.1516	0.0327252	0.1596	FALSE	FALSE	FALSE	S1T9P2	6300453	0.229445	0.0272304	outcome	TRUE	reported	textfile	7.12197e-06	12	6409619	3657	0.03371	TRUE	reported	igd	2	TRUE	0.00549998	20.2136	22.2192
	rs11089305	G	A	G	A	0.1295	-0.016561	0.2882	FALSE	FALSE	FALSE	S1T9P2	19741838	0.506861	0.0249513	outcome	TRUE	reported	textfile	1.45301e-06	22	19729361	3657	0.02684	TRUE	reported	igd	2	TRUE	0.00632548	23.2668	22.2192
	rs116540222	T	C	T	C	1.756	-0.0143148	0.0011	FALSE	FALSE	FALSE	S1T9P2	117612409	0.868738	0.086619	outcome	TRUE	reported	textfile	2.922e-06	3	117331256	3657	0.3749	TRUE	reported	igd	2	TRUE	0.00596342	21.9271	22.2192
	rs12412378	A	C	A	C	-0.1755	0.0360934	0.1608	FALSE	FALSE	FALSE	S1T9P2	128684899	0.333545	0.0373252	outcome	TRUE	reported	textfile	9.03795e-08	10	130483163	3657	0.03276	TRUE	reported	igd	2	TRUE	0.00778658	28.6833	22.2192
	rs13244540	T	G	T	G	0.2681	0.00421111	0.0447	FALSE	FALSE	FALSE	S1T9P2	151305448	0.918698	0.0412554	outcome	TRUE	reported	textfile	4.69505e-06	7	151002534	3657	0.05848	TRUE	reported	igd	2	TRUE	0.00571433	21.0059	22.2192
	rs141365416	T	C	T	C	2.328	-0.15248	0.0005	FALSE	FALSE	FALSE	S1T9P2	101771258	0.012113	0.0607771	outcome	TRUE	reported	textfile	2.79402e-06	1	102236814	3657	0.4961	TRUE	reported	igd	2	TRUE	0.00598543	22.0085	22.2192
	rs148362575	T	A	T	A	2.608	0.0142835	0.0008	FALSE	TRUE	TRUE	S1T9P2	186300608	0.881937	0.096176	outcome	TRUE	reported	textfile	2.46598e-06	2	187165335	3657	0.5526	TRUE	reported	igd	2	FALSE	0.00605385	22.2616	22.2192
	rs1838357	A	G	A	G	0.1167	0.0204084	0.3142	FALSE	FALSE	FALSE	S1T9P2	93088653	0.469053	0.0281876	outcome	TRUE	reported	textfile	9.94489e-06	13	93740906	3657	0.02638	TRUE	reported	igd	2	TRUE	0.00532291	19.5594	22.2192
	rs1938685	A	G	A	G	-0.158	0.0780196	0.1359	FALSE	FALSE	FALSE	S1T9P2	69462310	0.0103357	0.0304242	outcome	TRUE	reported	textfile	9.27492e-06	11	69277078	3657	0.03558	TRUE	reported	igd	2	TRUE	0.00536342	19.709	22.2192
	rs3138500	T	C	T	C	-0.2314	0.120571	0.0678	FALSE	FALSE	FALSE	S1T9P2	89605030	0.174425	0.0887777	outcome	TRUE	reported	textfile	2.62398e-06	9	92219945	3657	0.04918	TRUE	reported	igd	2	TRUE	0.00601733	22.1265	22.2192
	rs4785074	T	C	T	C	-0.1403	0.0190546	0.6349	FALSE	FALSE	FALSE	S1T9P2	59851833	0.45731	0.0256357	outcome	TRUE	reported	textfile	4.61998e-08	16	59885737	3657	0.02562	TRUE	reported	igd	2	TRUE	0.00813365	29.9723	22.2192
	rs55728331	A	G	A	G	1.624	0.0345029	0.0015	FALSE	FALSE	FALSE	S1T9P2	117655725	0.513151	0.0527615	outcome	TRUE	reported	textfile	2.90603e-06	11	117526440	3657	0.3466	TRUE	reported	igd	2	TRUE	0.00596747	21.9421	22.2192
	rs61294310	G	A	G	A	0.5223	0.277578	0.0124	FALSE	FALSE	FALSE	S1T9P2	5266324	0.0193981	0.118735	outcome	TRUE	reported	textfile	1.65299e-06	6	5266557	3657	0.1088	TRUE	reported	igd	2	TRUE	0.00626223	23.0327	22.2192
	rs62519719	A	G	A	G	-0.1218	-0.0361562	0.2815	FALSE	FALSE	FALSE	S1T9P2	117364728	0.367561	0.0401266	outcome	TRUE	reported	textfile	5.97998e-06	8	118376967	3657	0.02685	TRUE	reported	igd	2	TRUE	0.00559557	20.5669	22.2192
	rs74326785	C	T	C	T	0.351	0.0417206	0.0279	FALSE	FALSE	FALSE	S1T9P2	24692471	0.523786	0.0654419	outcome	TRUE	reported	textfile	2.65497e-06	8	24549984	3657	0.07464	TRUE	reported	igd	2	TRUE	0.00601074	22.1021	22.2192
	rs7449190	C	T	C	T	0.1298	-0.0708229	0.7401	FALSE	FALSE	FALSE	S1T9P2	1297803	0.0247309	0.0315388	outcome	TRUE	reported	textfile	3.66902e-06	5	1297918	3657	0.028	TRUE	reported	igd	2	TRUE	0.00584203	21.4781	22.2192
	rs8132059	T	C	T	C	-0.1294	-0.00728236	0.2244	FALSE	FALSE	FALSE	S1T9P2	15543965	0.798446	0.0285182	outcome	TRUE	reported	textfile	7.04304e-06	21	16916284	3657	0.02876	TRUE	reported	igd	2	TRUE	0.00550514	20.2327	22.2192
	rs897989	G	T	G	T	-0.1183	-0.0103878	0.3001	FALSE	FALSE	FALSE	S1T9P2	92240362	0.694469	0.0264459	outcome	TRUE	reported	textfile	8.57196e-06	11	91973528	3657	0.02654	TRUE	reported	igd	2	TRUE	0.00540368	19.8578	22.2192
GCST90001436	rs11225155	A	G	A	G	0.1112	-0.0737268	0.5364	FALSE	FALSE	FALSE	eeeSvV	102172669	0.00268034	0.0245576	outcome	TRUE	reported	textfile	5.85706e-06	11	102043400	3656	0.0245	TRUE	reported	igd	2	TRUE	0.00560313	20.5892	23.8752
	rs11653761	T	G	T	G	-0.1359	-0.00132543	0.592	FALSE	FALSE	FALSE	eeeSvV	2813241	0.955996	0.0240208	outcome	TRUE	reported	textfile	3.17497e-08	17	2716535	3656	0.02451	TRUE	reported	igd	2	TRUE	0.00833891	30.7266	23.8752
	rs12636848	G	T	G	T	0.1242	0.0258773	0.3031	FALSE	FALSE	FALSE	eeeSvV	147895293	0.274416	0.0236766	outcome	TRUE	reported	textfile	2.98401e-06	3	147613080	3656	0.02655	TRUE	reported	igd	2	TRUE	0.00594999	21.8714	23.8752
	rs12763172	C	T	C	T	0.132	-0.0362088	0.7213	FALSE	FALSE	FALSE	eeeSvV	83687763	0.123533	0.0235105	outcome	TRUE	reported	textfile	1.637e-06	10	85447519	3656	0.02749	TRUE	reported	igd	2	TRUE	0.00626703	23.0442	23.8752
	rs12874404	G	A	G	A	0.2221	-0.0269776	0.3256	FALSE	FALSE	FALSE	eeeSvV	108341146	0.67766	0.0649035	outcome	TRUE	reported	textfile	3.31284e-17	13	108993494	3656	0.0262	TRUE	reported	igd	2	TRUE	0.0192768	71.8219	23.8752
	rs139196765	G	A	G	A	1.237	0.127568	0.0025	FALSE	FALSE	FALSE	eeeSvV	24488617	0.541077	0.208722	outcome	TRUE	reported	textfile	7.49307e-07	15	24733764	3656	0.2495	TRUE	reported	igd	2	TRUE	0.00667855	24.5675	23.8752
	rs143003356	A	G	A	G	-0.5299	0.0758498	0.0115	FALSE	FALSE	FALSE	eeeSvV	141095317	0.376824	0.085826	outcome	TRUE	reported	textfile	4.78597e-06	4	142016471	3656	0.1157	TRUE	reported	igd	2	TRUE	0.00570467	20.9645	23.8752
	rs144625305	T	C	T	C	0.6141	-0.111705	0.0086	FALSE	FALSE	FALSE	eeeSvV	7832045	0.268912	0.101038	outcome	TRUE	reported	textfile	5.31202e-06	7	7871676	3656	0.1347	TRUE	reported	igd	2	TRUE	0.00565295	20.7733	23.8752
	rs1770731	T	A	T	A	-0.1473	-0.0372207	0.8254	FALSE	TRUE	TRUE	eeeSvV	106553581	0.337342	0.0387946	outcome	TRUE	reported	textfile	6.38705e-06	6	107001456	3656	0.0326	TRUE	reported	igd	2	FALSE	0.00555323	20.4048	23.8752
	rs17708396	A	C	A	C	2.518	0.0509032	0.0005	FALSE	FALSE	FALSE	eeeSvV	149030687	0.302661	0.0493849	outcome	TRUE	reported	textfile	1.41198e-06	5	148410250	3656	0.5212	TRUE	reported	igd	2	TRUE	0.00634355	23.3273	23.8752
	rs34173062	A	G	A	G	0.1453	-0.0572908	0.2153	FALSE	FALSE	FALSE	eeeSvV	144103704	0.286941	0.0538015	outcome	TRUE	reported	textfile	1.242e-06	8	145158607	3656	0.02991	TRUE	reported	igd	2	TRUE	0.00641354	23.5864	23.8752
	rs3810559	G	T	G	T	-0.1132	-0.00243048	0.5444	FALSE	FALSE	FALSE	eeeSvV	3227103	0.920428	0.0243303	outcome	TRUE	reported	textfile	4.24004e-06	20	3207749	3656	0.02457	TRUE	reported	igd	2	TRUE	0.00577248	21.2151	23.8752
	rs410173	G	A	G	A	-0.144	0.0279313	0.8222	FALSE	FALSE	FALSE	eeeSvV	1163306	0.294009	0.0266173	outcome	TRUE	reported	textfile	7.39299e-06	6	1163541	3656	0.03208	TRUE	reported	igd	2	TRUE	0.00548104	20.1381	23.8752
	rs4640493	T	A	T	A	0.1493	0.0173665	0.83	FALSE	TRUE	TRUE	eeeSvV	44991906	0.606116	0.0336805	outcome	TRUE	reported	textfile	4.01301e-06	22	45387786	3656	0.03234	TRUE	reported	igd	2	FALSE	0.00579574	21.3011	23.8752
	rs551529415	T	C	T	C	-0.5751	-0.838036	0.01	FALSE	FALSE	FALSE	eeeSvV	1157331	0.0502389	0.428023	outcome	TRUE	reported	textfile	3.62001e-06	19	1157330	3656	0.124	TRUE	reported	igd	2	TRUE	0.00584911	21.4984	23.8752
	rs557577736	G	A	G	A	1.799	0.174798	0.001	FALSE	FALSE	FALSE	eeeSvV	45649957	0.244948	0.150337	outcome	TRUE	reported	textfile	3.10699e-06	13	46224092	3656	0.3851	TRUE	reported	igd	2	TRUE	0.00593368	21.8111	23.8752
	rs6558507	T	C	T	C	-0.2635	0.335084	0.9547	FALSE	FALSE	FALSE	eeeSvV	1678054	0.0175703	0.141115	outcome	TRUE	reported	textfile	5.25001e-06	8	1626220	3656	0.05776	TRUE	reported	igd	2	TRUE	0.00566025	20.8003	23.8752
	rs6895553	C	T	C	T	-0.1889	0.000499988	0.0946	FALSE	FALSE	FALSE	eeeSvV	115485970	0.991233	0.0455027	outcome	TRUE	reported	textfile	7.88297e-06	5	114821667	3656	0.04221	TRUE	reported	igd	2	TRUE	0.00544822	20.0168	23.8752
	rs7254039	A	G	A	G	-0.2668	0.029214	0.0435	FALSE	FALSE	FALSE	eeeSvV	14882542	0.571787	0.0516677	outcome	TRUE	reported	textfile	4.68004e-06	19	14993354	3656	0.05819	TRUE	reported	igd	2	TRUE	0.00571714	21.0105	23.8752
	rs73192651	T	C	T	C	0.442	0.0700385	0.02	FALSE	FALSE	FALSE	eeeSvV	49638749	0.446182	0.0919388	outcome	TRUE	reported	textfile	5.43801e-07	13	50212885	3656	0.08807	TRUE	reported	igd	2	TRUE	0.00684228	25.1739	23.8752
	rs74505387	C	T	C	T	-0.2033	-0.0410983	0.1057	FALSE	FALSE	FALSE	eeeSvV	101443866	0.648306	0.0901049	outcome	TRUE	reported	textfile	3.08496e-07	6	101891742	3656	0.03964	TRUE	reported	igd	2	TRUE	0.00714312	26.2887	23.8752
	rs74839056	T	C	T	C	1.357	-0.0273389	0.0015	FALSE	FALSE	FALSE	eeeSvV	107262473	0.744326	0.083828	outcome	TRUE	reported	textfile	8.92093e-06	13	107914821	3656	0.3052	TRUE	reported	igd	2	TRUE	0.00537827	19.7585	23.8752
	rs75414548	A	G	A	G	0.2864	0.0100938	0.0354	FALSE	FALSE	FALSE	eeeSvV	38920042	0.838604	0.0495574	outcome	TRUE	reported	textfile	8.202e-06	1	39385714	3656	0.06412	TRUE	reported	igd	2	TRUE	0.00542737	19.9398	23.8752
	rs75766272	T	C	T	C	-0.3971	-0.0296118	0.0201	FALSE	FALSE	FALSE	eeeSvV	7949925	0.521078	0.046147	outcome	TRUE	reported	textfile	3.46003e-06	1	8009985	3656	0.08543	TRUE	reported	igd	2	TRUE	0.00587508	21.5944	23.8752
	rs77762131	C	G	C	G	0.3049	0.137884	0.045	FALSE	TRUE	TRUE	eeeSvV	95739501	0.3189	0.138337	outcome	TRUE	reported	textfile	1.13201e-07	14	96205838	3656	0.05737	TRUE	reported	igd	2	FALSE	0.00766649	28.2298	23.8752
	rs878471	A	G	A	G	-0.1135	0.0290401	0.5429	FALSE	FALSE	FALSE	eeeSvV	150575271	0.233785	0.0243898	outcome	TRUE	reported	textfile	6.73907e-06	1	150547747	3656	0.02517	TRUE	reported	igd	2	TRUE	0.00553108	20.323	23.8752
	rs9514859	C	G	C	G	0.112	-0.0283805	0.4402	FALSE	TRUE	TRUE	eeeSvV	108492497	0.259607	0.0251752	outcome	TRUE	reported	textfile	5.93403e-06	13	109144845	3656	0.02469	TRUE	reported	igd	2	FALSE	0.00559693	20.5663	23.8752
	rs9614226	G	T	G	T	-0.3841	-0.0714569	0.9792	FALSE	FALSE	FALSE	eeeSvV	44292270	0.375465	0.0806256	outcome	TRUE	reported	textfile	8.80603e-06	22	44688150	3656	0.08631	TRUE	reported	igd	2	TRUE	0.00538783	19.7938	23.8752
	rs974368	A	G	A	G	0.1136	0.033576	0.5141	FALSE	FALSE	FALSE	eeeSvV	62542831	0.162897	0.024062	outcome	TRUE	reported	textfile	4.17004e-06	14	63009549	3656	0.02464	TRUE	reported	igd	2	TRUE	0.00578031	21.2441	23.8752
GCST90001437	rs111830700	A	G	A	G	0.2916	-0.0398939	0.0377	FALSE	FALSE	FALSE	zJEPLA	121692346	0.615068	0.0793353	outcome	TRUE	reported	textfile	6.51493e-06	7	121332400	3656	0.06457	TRUE	reported	igd	2	TRUE	0.00554742	20.3834	21.7244
	rs112850074	G	A	G	A	0.3445	-0.0154204	0.031	FALSE	FALSE	FALSE	zJEPLA	102762732	0.807144	0.0631695	outcome	TRUE	reported	textfile	1.46299e-06	14	103229069	3656	0.07141	TRUE	reported	igd	2	TRUE	0.00632555	23.2607	21.7244
	rs115204570	T	G	T	G	-0.479	-0.0954888	0.0161	FALSE	FALSE	FALSE	zJEPLA	136420768	0.358415	0.103974	outcome	TRUE	reported	textfile	3.26701e-06	5	135756457	3656	0.1028	TRUE	reported	igd	2	TRUE	0.00590347	21.6994	21.7244
	rs11653761	T	G	T	G	-0.1122	-0.00132543	0.592	FALSE	FALSE	FALSE	zJEPLA	2813241	0.955996	0.0240208	outcome	TRUE	reported	textfile	6.17206e-06	17	2716535	3656	0.02478	TRUE	reported	igd	2	TRUE	0.00557633	20.4902	21.7244
	rs116844769	A	G	A	G	-0.2342	-0.117798	0.0662	FALSE	FALSE	FALSE	zJEPLA	65247177	0.0753217	0.0662347	outcome	TRUE	reported	textfile	3.92202e-06	14	65713895	3656	0.05066	TRUE	reported	igd	2	TRUE	0.00581174	21.3602	21.7244
	rs11937214	G	A	G	A	0.271	-0.0763735	0.0465	FALSE	FALSE	FALSE	zJEPLA	161712874	0.160899	0.0544725	outcome	TRUE	reported	textfile	9.17698e-06	4	162634026	3656	0.06102	TRUE	reported	igd	2	TRUE	0.00536601	19.7132	21.7244
	rs12939565	T	A	T	A	-0.1308	-0.0418282	0.4267	FALSE	TRUE	TRUE	zJEPLA	39882136	0.0757809	0.0235558	outcome	TRUE	reported	textfile	5.41901e-06	17	38038389	3656	0.02872	TRUE	reported	igd	2	FALSE	0.00564136	20.7305	21.7244
	rs17056318	C	T	C	T	-0.2266	-0.00417479	0.081	FALSE	FALSE	FALSE	zJEPLA	158858945	0.935471	0.0515637	outcome	TRUE	reported	textfile	8.38591e-07	5	158285953	3656	0.04592	TRUE	reported	igd	2	TRUE	0.00661648	24.3376	21.7244
	rs2395904	G	T	G	T	-0.1504	0.000463352	0.2657	FALSE	FALSE	FALSE	zJEPLA	129605573	0.986168	0.026727	outcome	TRUE	reported	textfile	6.15106e-08	8	130617819	3656	0.02772	TRUE	reported	igd	2	TRUE	0.00798767	29.422	21.7244
	rs2978582	C	T	C	T	0.1509	0.0196788	0.1969	FALSE	FALSE	FALSE	zJEPLA	35627986	0.552315	0.0331128	outcome	TRUE	reported	textfile	1.84599e-06	8	35485504	3656	0.0316	TRUE	reported	igd	2	TRUE	0.00619866	22.7912	21.7244
	rs35607968	T	C	T	C	0.1611	-0.0185096	0.1536	FALSE	FALSE	FALSE	zJEPLA	68188892	0.503509	0.0276684	outcome	TRUE	reported	textfile	2.82703e-06	7	67653879	3656	0.03434	TRUE	reported	igd	2	TRUE	0.00598381	21.9965	21.7244
	rs4361609	C	G	C	G	-0.1954	0.0321917	0.1131	FALSE	TRUE	TRUE	zJEPLA	31272858	0.252459	0.0281298	outcome	TRUE	reported	textfile	9.11801e-06	6	31240635	3656	0.04397	TRUE	reported	igd	2	FALSE	0.00537267	19.7378	21.7244
	rs4361743	C	T	C	T	0.3335	-0.0512091	0.9725	FALSE	FALSE	FALSE	zJEPLA	131645188	0.138102	0.0345332	outcome	TRUE	reported	textfile	6.96707e-06	8	132657435	3656	0.07409	TRUE	reported	igd	2	TRUE	0.00551145	20.2505	21.7244
	rs4805840	G	A	G	A	-0.1599	0.0178977	0.823	FALSE	FALSE	FALSE	zJEPLA	32977576	0.685651	0.0442176	outcome	TRUE	reported	textfile	1.41501e-06	19	33468482	3656	0.03309	TRUE	reported	igd	2	TRUE	0.00634647	23.3381	21.7244
	rs55658072	G	A	G	A	0.1132	0.0214475	0.6219	FALSE	FALSE	FALSE	zJEPLA	14762472	0.370475	0.0239481	outcome	TRUE	reported	textfile	9.63407e-06	19	14873284	3656	0.02554	TRUE	reported	igd	2	TRUE	0.00534463	19.6342	21.7244
	rs55708924	G	A	G	A	-0.3974	0.023382	0.0185	FALSE	FALSE	FALSE	zJEPLA	15395027	0.719479	0.0651026	outcome	TRUE	reported	textfile	8.23797e-06	21	16767346	3656	0.08899	TRUE	reported	igd	2	TRUE	0.00542506	19.9313	21.7244
	rs56097028	C	G	C	G	0.1156	-0.00245812	0.3832	FALSE	TRUE	TRUE	zJEPLA	43553866	0.92307	0.025455	outcome	TRUE	reported	textfile	6.47903e-06	11	43575416	3656	0.02559	TRUE	reported	igd	2	FALSE	0.00555075	20.3956	21.7244
	rs7270264	C	T	C	T	-0.1135	0.0302482	0.4132	FALSE	FALSE	FALSE	zJEPLA	43449975	0.26275	0.0270093	outcome	TRUE	reported	textfile	5.87706e-06	20	42078615	3656	0.02501	TRUE	reported	igd	2	TRUE	0.00560168	20.5839	21.7244
	rs74151247	A	C	A	C	0.3341	-0.184062	0.0302	FALSE	FALSE	FALSE	zJEPLA	96041316	0.0612167	0.0983274	outcome	TRUE	reported	textfile	4.39097e-06	10	97801073	3656	0.07265	TRUE	reported	igd	2	TRUE	0.00575136	21.137	21.7244
	rs74397782	A	G	A	G	-0.3176	0.0201249	0.0343	FALSE	FALSE	FALSE	zJEPLA	24865725	0.71014	0.0541477	outcome	TRUE	reported	textfile	1.679e-06	12	25018659	3656	0.06621	TRUE	reported	igd	2	TRUE	0.00625436	22.9973	21.7244
	rs76845048	C	A	C	A	-0.3046	-0.0671884	0.0357	FALSE	FALSE	FALSE	zJEPLA	116449797	0.549722	0.112322	outcome	TRUE	reported	textfile	6.33695e-06	5	115785493	3656	0.06737	TRUE	reported	igd	2	TRUE	0.00556031	20.431	21.7244
	rs78433555	A	C	A	C	0.2756	-0.199918	0.0501	FALSE	FALSE	FALSE	zJEPLA	107427544	0.0430457	0.0988092	outcome	TRUE	reported	textfile	1.42498e-06	12	107821321	3656	0.05706	TRUE	reported	igd	2	TRUE	0.00634054	23.3162	21.7244
GCST90001438	rs115414430	G	C	G	C	0.3388	0.0520004	0.0286	FALSE	TRUE	TRUE	utU9VR	36493692	0.45655	0.0698423	outcome	TRUE	reported	textfile	3.29102e-06	2	36720835	3656	0.07271	TRUE	reported	igd	2	FALSE	0.00590365	21.7001	21.9151
	rs11653761	T	G	T	G	-0.1121	-0.00132543	0.592	FALSE	FALSE	FALSE	utU9VR	2813241	0.955996	0.0240208	outcome	TRUE	reported	textfile	3.28897e-06	17	2716535	3656	0.02405	TRUE	reported	igd	2	TRUE	0.00590747	21.7142	21.9151
	rs117605782	A	G	A	G	0.8913	0.00704022	0.0034	FALSE	FALSE	FALSE	utU9VR	48915804	0.931063	0.0813823	outcome	TRUE	reported	textfile	7.486e-06	18	46442174	3656	0.1987	TRUE	reported	igd	2	TRUE	0.00547346	20.1101	21.9151
	rs141352577	T	C	T	C	0.3656	0.169536	0.0235	FALSE	FALSE	FALSE	utU9VR	8450324	0.101889	0.103644	outcome	TRUE	reported	textfile	1.95501e-06	3	8492010	3656	0.07671	TRUE	reported	igd	2	TRUE	0.00617465	22.7023	21.9151
	rs149006488	G	C	G	C	-0.1579	-0.00479237	0.1496	FALSE	TRUE	TRUE	utU9VR	67756244	0.86885	0.0290236	outcome	TRUE	reported	textfile	3.83804e-06	11	67523715	3656	0.03413	TRUE	reported	igd	2	FALSE	0.00582037	21.3921	21.9151
	rs16925715	C	T	C	T	-0.1298	0.00124803	0.2824	FALSE	FALSE	FALSE	utU9VR	52013082	0.959945	0.0248497	outcome	TRUE	reported	textfile	1.556e-06	10	53772842	3656	0.02698	TRUE	reported	igd	2	TRUE	0.00629098	23.1328	21.9151
	rs4936106	G	C	G	C	0.3309	0.0439248	0.0289	FALSE	TRUE	TRUE	utU9VR	130490507	0.513994	0.0673042	outcome	TRUE	reported	textfile	3.62602e-06	11	130360402	3656	0.07134	TRUE	reported	igd	2	FALSE	0.00585023	21.5025	21.9151
	rs533086	G	A	G	A	-0.119	-0.00503946	0.7021	FALSE	FALSE	FALSE	utU9VR	16301030	0.852619	0.0271262	outcome	TRUE	reported	textfile	5.45306e-06	19	16411841	3656	0.02614	TRUE	reported	igd	2	TRUE	0.00563666	20.7131	21.9151
	rs60035843	G	A	G	A	0.1277	0.00723687	0.2382	FALSE	FALSE	FALSE	utU9VR	68830883	0.780028	0.0259122	outcome	TRUE	reported	textfile	7.63801e-06	15	69123222	3656	0.02849	TRUE	reported	igd	2	TRUE	0.00546526	20.0798	21.9151
	rs73178168	T	C	T	C	0.1583	0.00076984	0.1703	FALSE	FALSE	FALSE	utU9VR	47235494	0.989489	0.0584372	outcome	TRUE	reported	textfile	1.23501e-06	13	47809629	3656	0.03258	TRUE	reported	igd	2	TRUE	0.00641591	23.5951	21.9151
	rs73185679	C	T	C	T	0.1715	-0.0975693	0.1041	FALSE	FALSE	FALSE	utU9VR	186768074	0.0393604	0.0473546	outcome	TRUE	reported	textfile	9.56093e-06	3	186485863	3656	0.0387	TRUE	reported	igd	2	TRUE	0.00534286	19.6277	21.9151
	rs7595246	C	T	C	T	0.14	-0.0659598	0.1893	FALSE	FALSE	FALSE	utU9VR	237646014	0.0281093	0.0300396	outcome	TRUE	reported	textfile	4.08602e-06	2	238554657	3656	0.03035	TRUE	reported	igd	2	TRUE	0.00578645	21.2667	21.9151
	rs77848220	T	C	T	C	0.405	-0.141972	0.0219	FALSE	FALSE	FALSE	utU9VR	60785762	0.109899	0.0888079	outcome	TRUE	reported	textfile	9.04191e-07	1	61251434	3656	0.08232	TRUE	reported	igd	2	TRUE	0.00657699	24.1914	21.9151
	rs7840395	G	A	G	A	-0.1267	-0.0139225	0.5715	FALSE	FALSE	FALSE	utU9VR	143910788	0.556586	0.0236809	outcome	TRUE	reported	textfile	1.85498e-07	8	144984956	3656	0.02425	TRUE	reported	igd	2	TRUE	0.00741127	27.283	21.9151
	rs78893742	A	G	A	G	0.6139	0.133071	0.0081	FALSE	FALSE	FALSE	utU9VR	37471609	0.208013	0.105692	outcome	TRUE	reported	textfile	3.47696e-06	20	36100011	3656	0.1321	TRUE	reported	igd	2	TRUE	0.00587253	21.585	21.9151
	rs79407211	T	C	T	C	-0.1927	-0.00713262	0.0886	FALSE	FALSE	FALSE	utU9VR	108466914	0.882581	0.0482918	outcome	TRUE	reported	textfile	7.15303e-06	13	109119262	3656	0.04286	TRUE	reported	igd	2	TRUE	0.00549868	20.2033	21.9151
	rs9520836	G	A	G	A	0.1117	-0.0607499	0.5044	FALSE	FALSE	FALSE	utU9VR	108304715	0.0317519	0.0282884	outcome	TRUE	reported	textfile	3.14398e-06	13	108957063	3656	0.02394	TRUE	reported	igd	2	TRUE	0.00591934	21.7581	21.9151
GCST90001439	rs11657118	C	T	C	T	-0.1428	-0.00956352	0.475	FALSE	FALSE	FALSE	EjRbXU	2810824	0.690359	0.0240068	outcome	TRUE	reported	textfile	3.70101e-09	17	2714118	3656	0.02416	TRUE	reported	igd	2	TRUE	0.00946512	34.916	26.8435
	rs12874404	G	A	G	A	0.2335	-0.0269776	0.3256	FALSE	FALSE	FALSE	EjRbXU	108341146	0.67766	0.0649035	outcome	TRUE	reported	textfile	1.09295e-18	13	108993494	3656	0.02632	TRUE	reported	igd	2	TRUE	0.0210739	78.6619	26.8435
	rs1382818	A	G	A	G	0.1127	-0.0114126	0.3734	FALSE	FALSE	FALSE	EjRbXU	153324650	0.632202	0.0238443	outcome	TRUE	reported	textfile	7.13707e-06	6	153645785	3656	0.02506	TRUE	reported	igd	2	TRUE	0.00550153	20.2138	26.8435
	rs141107540	T	C	T	C	0.2109	0.183457	0.0777	FALSE	FALSE	FALSE	EjRbXU	108386059	0.557431	0.312713	outcome	TRUE	reported	textfile	6.71305e-06	13	109038407	3656	0.04678	TRUE	reported	igd	2	TRUE	0.00552865	20.314	26.8435
	rs183466766	A	G	A	G	0.2998	0.0183457	0.0402	FALSE	FALSE	FALSE	EjRbXU	108058383	0.87416	0.115835	outcome	TRUE	reported	textfile	8.89693e-07	13	108710731	3656	0.06089	TRUE	reported	igd	2	TRUE	0.00658711	24.2289	26.8435
	rs2015983	C	A	C	A	-0.1746	-0.0260752	0.8771	FALSE	FALSE	FALSE	EjRbXU	236241523	0.389376	0.0302936	outcome	TRUE	reported	textfile	1.874e-06	2	237150166	3656	0.03658	TRUE	reported	igd	2	TRUE	0.00619294	22.77	26.8435
	rs3810559	G	T	G	T	-0.1107	-0.00243048	0.5444	FALSE	FALSE	FALSE	EjRbXU	3227103	0.920428	0.0243303	outcome	TRUE	reported	textfile	7.52004e-06	20	3207749	3656	0.02469	TRUE	reported	igd	2	TRUE	0.00546846	20.0916	26.8435
	rs4937689	G	A	G	A	-0.1736	-0.0641547	0.1134	FALSE	FALSE	FALSE	EjRbXU	132271307	0.0235272	0.0283273	outcome	TRUE	reported	textfile	9.35793e-06	11	132141201	3656	0.03911	TRUE	reported	igd	2	TRUE	0.00536023	19.6918	26.8435
	rs61788860	A	G	A	G	-0.2606	0.0156947	0.0475	FALSE	FALSE	FALSE	EjRbXU	59554567	0.702965	0.041159	outcome	TRUE	reported	textfile	6.85993e-06	1	60020239	3656	0.05786	TRUE	reported	igd	2	TRUE	0.00551801	20.2747	26.8435
	rs6781675	C	G	C	G	0.3639	0.0167486	0.0235	FALSE	TRUE	TRUE	EjRbXU	4366751	0.882168	0.112997	outcome	TRUE	reported	textfile	6.68405e-06	3	4408435	3656	0.08068	TRUE	reported	igd	2	FALSE	0.00553371	20.3327	26.8435
	rs7254039	A	G	A	G	-0.263	0.029214	0.0435	FALSE	FALSE	FALSE	EjRbXU	14882542	0.571787	0.0516677	outcome	TRUE	reported	textfile	6.39794e-06	19	14993354	3656	0.05818	TRUE	reported	igd	2	TRUE	0.00555824	20.4233	26.8435
	rs73192651	T	C	T	C	0.4819	0.0700385	0.02	FALSE	FALSE	FALSE	EjRbXU	49638749	0.446182	0.0919388	outcome	TRUE	reported	textfile	6.07393e-08	13	50212885	3656	0.08877	TRUE	reported	igd	2	TRUE	0.00799629	29.454	26.8435
	rs75766272	T	C	T	C	-0.4103	-0.0296118	0.0201	FALSE	FALSE	FALSE	EjRbXU	7949925	0.521078	0.046147	outcome	TRUE	reported	textfile	1.81899e-06	1	8009985	3656	0.08583	TRUE	reported	igd	2	TRUE	0.00621173	22.8395	26.8435
	rs77762131	C	G	C	G	0.3082	0.137884	0.045	FALSE	TRUE	TRUE	EjRbXU	95739501	0.3189	0.138337	outcome	TRUE	reported	textfile	8.52491e-08	14	96205838	3656	0.05742	TRUE	reported	igd	2	FALSE	0.00781851	28.794	26.8435
	rs8014978	C	T	C	T	-0.11	-0.0413941	0.5737	FALSE	FALSE	FALSE	EjRbXU	94470627	0.0864789	0.0241467	outcome	TRUE	reported	textfile	9.59997e-06	14	94936964	3656	0.02481	TRUE	reported	igd	2	TRUE	0.00534807	19.6469	26.8435
GCST90001440	rs11066272	T	A	T	A	-0.1184	0.0212493	0.557	FALSE	TRUE	TRUE	vqHHL7	112364420	0.381811	0.024297	outcome	TRUE	reported	textfile	9.09306e-06	12	112802224	3656	0.02664	TRUE	reported	igd	2	FALSE	0.00537389	19.7423	21.0815
	rs111237501	C	T	C	T	1.002	0.0505847	0.003	FALSE	FALSE	FALSE	vqHHL7	163302911	0.599723	0.0963889	outcome	TRUE	reported	textfile	9.47109e-06	1	163272701	3656	0.226	TRUE	reported	igd	2	TRUE	0.0053479	19.6463	21.0815
	rs11674994	C	T	C	T	0.2499	-0.0436087	0.0553	FALSE	FALSE	FALSE	vqHHL7	59898228	0.587596	0.080411	outcome	TRUE	reported	textfile	8.30309e-06	2	60125363	3656	0.05599	TRUE	reported	igd	2	TRUE	0.00541933	19.9101	21.0815
	rs11862268	A	G	A	G	0.4267	-0.0107586	0.0187	FALSE	FALSE	FALSE	vqHHL7	81206262	0.885794	0.074906	outcome	TRUE	reported	textfile	2.464e-06	16	81239867	3656	0.09042	TRUE	reported	igd	2	TRUE	0.00605442	22.2576	21.0815
	rs139509958	A	G	A	G	-0.2174	0.0362912	0.0788	FALSE	FALSE	FALSE	vqHHL7	54333243	0.863349	0.210858	outcome	TRUE	reported	textfile	5.57995e-06	12	54727027	3656	0.0478	TRUE	reported	igd	2	TRUE	0.00562609	20.6741	21.0815
	rs146221269	C	T	C	T	-1.07	-0.387348	0.0029	FALSE	FALSE	FALSE	vqHHL7	95187692	0.152595	0.270792	outcome	TRUE	reported	textfile	6.59903e-06	11	94920856	3656	0.2371	TRUE	reported	igd	2	TRUE	0.00553969	20.3548	21.0815
	rs17044633	G	A	G	A	0.3433	-0.0412665	0.0286	FALSE	FALSE	FALSE	vqHHL7	112410492	0.784545	0.150938	outcome	TRUE	reported	textfile	6.45194e-06	4	113331648	3656	0.076	TRUE	reported	igd	2	TRUE	0.00555005	20.3931	21.0815
	rs17102161	A	G	A	G	0.2573	-0.0105644	0.0506	FALSE	FALSE	FALSE	vqHHL7	64817240	0.803073	0.0423639	outcome	TRUE	reported	textfile	6.28102e-06	14	65283958	3656	0.05689	TRUE	reported	igd	2	TRUE	0.00556389	20.4442	21.0815
	rs183821560	A	G	A	G	-1.768	0.165171	0.0016	FALSE	FALSE	FALSE	vqHHL7	62776497	0.115107	0.104827	outcome	TRUE	reported	textfile	7.04807e-06	5	62072324	3656	0.393	TRUE	reported	igd	2	TRUE	0.00550523	20.2275	21.0815
	rs191543445	G	A	G	A	0.3254	-0.0465927	0.031	FALSE	FALSE	FALSE	vqHHL7	31035932	0.54566	0.077105	outcome	TRUE	reported	textfile	7.01504e-06	14	31505138	3656	0.07232	TRUE	reported	igd	2	TRUE	0.00550698	20.2339	21.0815
	rs30146	C	T	C	T	-0.4244	-0.0275498	0.0198	FALSE	FALSE	FALSE	vqHHL7	14248326	0.477762	0.0388076	outcome	TRUE	reported	textfile	3.30697e-06	16	14342183	3656	0.09112	TRUE	reported	igd	2	TRUE	0.00589858	21.6813	21.0815
	rs451367	C	T	C	T	-0.1313	-0.00706194	0.7674	FALSE	FALSE	FALSE	vqHHL7	16302031	0.835001	0.0339041	outcome	TRUE	reported	textfile	9.51305e-06	19	16412842	3656	0.0296	TRUE	reported	igd	2	TRUE	0.00535314	19.6657	21.0815
	rs496760	A	G	A	G	0.1187	-0.0263313	0.6422	FALSE	FALSE	FALSE	vqHHL7	54403488	0.264942	0.02362	outcome	TRUE	reported	textfile	8.15305e-06	15	54695686	3656	0.02657	TRUE	reported	igd	2	TRUE	0.00542935	19.9471	21.0815
	rs55756125	C	T	C	T	0.1417	0.00155314	0.2289	FALSE	FALSE	FALSE	vqHHL7	59275293	0.955204	0.0276495	outcome	TRUE	reported	textfile	2.21702e-06	1	59740965	3656	0.0299	TRUE	reported	igd	2	TRUE	0.00610564	22.4471	21.0815
	rs58904842	A	C	A	C	-0.1174	0.000168806	0.4768	FALSE	FALSE	FALSE	vqHHL7	3413156	0.994309	0.023666	outcome	TRUE	reported	textfile	2.72101e-06	16	3463156	3656	0.02499	TRUE	reported	igd	2	TRUE	0.00600045	22.058	21.0815
	rs6687573	A	C	A	C	0.1339	0.00429766	0.2311	FALSE	FALSE	FALSE	vqHHL7	34815707	0.883006	0.0292042	outcome	TRUE	reported	textfile	5.57301e-06	1	35281308	3656	0.02945	TRUE	reported	igd	2	TRUE	0.00562258	20.6611	21.0815
	rs6991364	A	G	A	G	-0.1156	-0.0158508	0.5149	FALSE	FALSE	FALSE	vqHHL7	143976177	0.508793	0.0239903	outcome	TRUE	reported	textfile	5.19505e-06	8	145050345	3656	0.02534	TRUE	reported	igd	2	TRUE	0.00566019	20.8001	21.0815
	rs72990172	A	G	A	G	0.1576	-0.0690127	0.1711	FALSE	FALSE	FALSE	vqHHL7	237617636	0.0176946	0.0290953	outcome	TRUE	reported	textfile	1.92699e-06	2	238526279	3656	0.03306	TRUE	reported	igd	2	TRUE	0.00617745	22.7127	21.0815
	rs73277142	T	C	T	C	0.2673	0.159346	0.0555	FALSE	FALSE	FALSE	vqHHL7	11821398	0.0320553	0.0743313	outcome	TRUE	reported	textfile	1.58099e-06	12	11974332	3656	0.05558	TRUE	reported	igd	2	TRUE	0.0062866	23.1166	21.0815
	rs75150138	A	T	A	T	-0.2581	-0.0201804	0.0517	FALSE	TRUE	TRUE	vqHHL7	49204673	0.791174	0.0762135	outcome	TRUE	reported	textfile	4.05303e-06	16	49238584	3656	0.05593	TRUE	reported	igd	2	FALSE	0.00579106	21.2838	21.0815
	rs75464772	T	C	T	C	-0.328	0.107306	0.0325	FALSE	FALSE	FALSE	vqHHL7	19787995	0.14174	0.0730303	outcome	TRUE	reported	textfile	3.94003e-06	6	19788226	3656	0.07098	TRUE	reported	igd	2	TRUE	0.00580685	21.3421	21.0815
	rs76225955	C	T	C	T	-0.1917	0.0645706	0.0909	FALSE	FALSE	FALSE	vqHHL7	31592382	0.116996	0.0411932	outcome	TRUE	reported	textfile	9.29994e-06	4	31594004	3656	0.04317	TRUE	reported	igd	2	TRUE	0.00536461	19.708	21.0815
	rs807894	G	T	G	T	0.1202	0.0315717	0.5868	FALSE	FALSE	FALSE	vqHHL7	164189855	0.19713	0.0244785	outcome	TRUE	reported	textfile	2.99799e-06	6	164610887	3656	0.02568	TRUE	reported	igd	2	TRUE	0.00595687	21.8968	21.0815
	rs8098848	T	C	T	C	-0.1264	0.0162045	0.6704	FALSE	FALSE	FALSE	vqHHL7	63190560	0.507157	0.0244312	outcome	TRUE	reported	textfile	2.243e-06	18	60857793	3656	0.02668	TRUE	reported	igd	2	TRUE	0.0061018	22.4329	21.0815
	rs9398107	G	A	G	A	0.2699	0.0396065	0.0555	FALSE	FALSE	FALSE	vqHHL7	106707812	0.559911	0.0679387	outcome	TRUE	reported	textfile	1.36301e-06	6	107155687	3656	0.05578	TRUE	reported	igd	2	TRUE	0.00636312	23.3997	21.0815
GCST90001441	rs111830700	A	G	A	G	0.2933	-0.0398939	0.0377	FALSE	FALSE	FALSE	sEqxHH	121692346	0.615068	0.0793353	outcome	TRUE	reported	textfile	3.85896e-06	7	121332400	3656	0.0634	TRUE	reported	igd	2	TRUE	0.00581975	21.3899	21.9067
	rs115204570	T	G	T	G	-0.4604	-0.0954888	0.0161	FALSE	FALSE	FALSE	sEqxHH	136420768	0.358415	0.103974	outcome	TRUE	reported	textfile	5.08698e-06	5	135756457	3656	0.1008	TRUE	reported	igd	2	TRUE	0.00567378	20.8503	21.9067
	rs116844769	A	G	A	G	-0.232	-0.117798	0.0662	FALSE	FALSE	FALSE	sEqxHH	65247177	0.0753217	0.0662347	outcome	TRUE	reported	textfile	3.28103e-06	14	65713895	3656	0.04979	TRUE	reported	igd	2	TRUE	0.00590356	21.6997	21.9067
	rs12542190	C	A	C	A	-0.1572	0.00167616	0.1943	FALSE	FALSE	FALSE	sEqxHH	129582515	0.951028	0.0272922	outcome	TRUE	reported	textfile	2.72402e-07	8	130594761	3656	0.03051	TRUE	reported	igd	2	TRUE	0.00720896	26.5328	21.9067
	rs12939565	T	A	T	A	-0.1318	-0.0418282	0.4267	FALSE	TRUE	TRUE	sEqxHH	39882136	0.0757809	0.0235558	outcome	TRUE	reported	textfile	1.87098e-06	17	38038389	3656	0.02761	TRUE	reported	igd	2	FALSE	0.00619432	22.7751	21.9067
	rs140523784	T	C	T	C	0.1447	0.0423058	0.1864	FALSE	FALSE	FALSE	sEqxHH	16887378	0.201013	0.0330858	outcome	TRUE	reported	textfile	4.58205e-06	6	16887609	3656	0.03153	TRUE	reported	igd	2	TRUE	0.00572781	21.05	21.9067
	rs16837671	G	T	G	T	-0.2649	0.0246818	0.0494	FALSE	FALSE	FALSE	sEqxHH	205791229	0.743625	0.0754665	outcome	TRUE	reported	textfile	3.95103e-06	2	206655953	3656	0.05732	TRUE	reported	igd	2	TRUE	0.00580785	21.3459	21.9067
	rs17056318	C	T	C	T	-0.2015	-0.00417479	0.081	FALSE	FALSE	FALSE	sEqxHH	158858945	0.935471	0.0515637	outcome	TRUE	reported	textfile	8.14292e-06	5	158285953	3656	0.04509	TRUE	reported	igd	2	TRUE	0.00543272	19.9596	21.9067
	rs2978582	C	T	C	T	0.1404	0.0196788	0.1969	FALSE	FALSE	FALSE	sEqxHH	35627986	0.552315	0.0331128	outcome	TRUE	reported	textfile	6.34498e-06	8	35485504	3656	0.03106	TRUE	reported	igd	2	TRUE	0.00555782	20.4218	21.9067
	rs2994690	C	G	C	G	0.1312	0.0215502	0.2462	FALSE	TRUE	TRUE	sEqxHH	94897309	0.38591	0.0248544	outcome	TRUE	reported	textfile	3.38197e-06	14	95363646	3656	0.02819	TRUE	reported	igd	2	FALSE	0.00588987	21.6491	21.9067
	rs34712193	T	A	T	A	0.1567	-0.0836496	0.1644	FALSE	TRUE	TRUE	sEqxHH	1772456	0.00542988	0.0300859	outcome	TRUE	reported	textfile	1.44501e-06	3	1814140	3656	0.03246	TRUE	reported	igd	2	FALSE	0.00633396	23.2918	21.9067
	rs34910780	T	A	T	A	-0.282	0.128797	0.048	FALSE	TRUE	TRUE	sEqxHH	77840371	0.174448	0.0948398	outcome	TRUE	reported	textfile	7.03105e-07	7	77469688	3656	0.05676	TRUE	reported	igd	2	FALSE	0.00670633	24.6704	21.9067
	rs4361609	C	G	C	G	-0.2163	0.0321917	0.1131	FALSE	TRUE	TRUE	sEqxHH	31272858	0.252459	0.0281298	outcome	TRUE	reported	textfile	3.57298e-07	6	31240635	3656	0.04242	TRUE	reported	igd	2	FALSE	0.00706135	25.9857	21.9067
	rs4805840	G	A	G	A	-0.152	0.0178977	0.823	FALSE	FALSE	FALSE	sEqxHH	32977576	0.685651	0.0442176	outcome	TRUE	reported	textfile	2.85503e-06	19	33468482	3656	0.03242	TRUE	reported	igd	2	TRUE	0.00597656	21.9697	21.9067
	rs520786	A	T	A	T	-0.1136	0.00615076	0.3489	FALSE	TRUE	TRUE	sEqxHH	187841276	0.803586	0.0247308	outcome	TRUE	reported	textfile	9.48506e-06	3	187559064	3656	0.02562	TRUE	reported	igd	2	FALSE	0.00534888	19.6499	21.9067
	rs6131010	G	A	G	A	-0.1285	0.0798304	0.6172	FALSE	FALSE	FALSE	sEqxHH	46095666	0.00201916	0.0258568	outcome	TRUE	reported	textfile	6.64003e-07	20	44724305	3656	0.0258	TRUE	reported	igd	2	TRUE	0.00673944	24.793	21.9067
	rs71483382	A	G	A	G	0.6298	-0.0193519	0.0078	FALSE	FALSE	FALSE	sEqxHH	82003830	0.736434	0.0574959	outcome	TRUE	reported	textfile	6.90399e-06	10	83763586	3656	0.1399	TRUE	reported	igd	2	TRUE	0.00551268	20.255	21.9067
	rs73426855	C	T	C	T	-0.1549	0.0196318	0.1469	FALSE	FALSE	FALSE	sEqxHH	79663261	0.492725	0.0286186	outcome	TRUE	reported	textfile	6.67806e-06	17	77637123	3656	0.03435	TRUE	reported	igd	2	TRUE	0.00553139	20.3241	21.9067
	rs75319860	C	T	C	T	0.3524	0.00424325	0.0249	FALSE	FALSE	FALSE	sEqxHH	109874424	0.966086	0.0997986	outcome	TRUE	reported	textfile	8.61509e-06	12	110312229	3656	0.07909	TRUE	reported	igd	2	TRUE	0.00540095	19.8423	21.9067
	rs76578043	A	G	A	G	0.3251	-0.0620685	0.0298	FALSE	FALSE	FALSE	sEqxHH	104562459	0.420749	0.0770919	outcome	TRUE	reported	textfile	2.89601e-06	13	105214810	3656	0.06938	TRUE	reported	igd	2	TRUE	0.00596979	21.9446	21.9067
	rs76845048	C	A	C	A	-0.2982	-0.0671884	0.0357	FALSE	FALSE	FALSE	sEqxHH	116449797	0.549722	0.112322	outcome	TRUE	reported	textfile	6.99198e-06	5	115785493	3656	0.06626	TRUE	reported	igd	2	TRUE	0.00550943	20.243	21.9067
	rs9900847	C	T	C	T	-0.1133	-0.0169446	0.6041	FALSE	FALSE	FALSE	sEqxHH	2813924	0.489787	0.0245344	outcome	TRUE	reported	textfile	4.05602e-06	17	2717218	3656	0.02454	TRUE	reported	igd	2	TRUE	0.00579669	21.3046	21.9067
GCST90001442	rs112542522	A	G	A	G	0.6143	0.0735975	0.0082	FALSE	FALSE	FALSE	bTPRs3	3983750	0.394213	0.0863818	outcome	TRUE	reported	textfile	3.72804e-06	2	4031340	3656	0.1326	TRUE	reported	igd	2	TRUE	0.00583614	21.4504	25.0036
	rs112782756	G	A	G	A	2.99	-0.101824	0.0003	FALSE	FALSE	FALSE	bTPRs3	33931936	0.298373	0.0979147	outcome	TRUE	reported	textfile	8.99104e-06	13	34506073	3656	0.6726	TRUE	reported	igd	2	TRUE	0.00537627	19.7511	25.0036
	rs11657759	C	A	C	A	-0.1352	-0.00795813	0.4903	FALSE	FALSE	FALSE	bTPRs3	2812667	0.739648	0.0239472	outcome	TRUE	reported	textfile	1.80701e-08	17	2715961	3656	0.02397	TRUE	reported	igd	2	TRUE	0.00862677	31.7965	25.0036
	rs12636848	G	T	G	T	0.1237	0.0258773	0.3031	FALSE	FALSE	FALSE	bTPRs3	147895293	0.274416	0.0236766	outcome	TRUE	reported	textfile	3.02601e-06	3	147613080	3656	0.02646	TRUE	reported	igd	2	TRUE	0.00594244	21.8435	25.0036
	rs12829274	G	A	G	A	-0.2708	0.076157	0.0618	FALSE	FALSE	FALSE	bTPRs3	128864622	0.0989077	0.0461508	outcome	TRUE	reported	textfile	1.24099e-07	12	129349167	3656	0.05111	TRUE	reported	igd	2	TRUE	0.00762004	28.0574	25.0036
	rs12874404	G	A	G	A	0.2114	-0.0269776	0.3256	FALSE	FALSE	FALSE	bTPRs3	108341146	0.67766	0.0649035	outcome	TRUE	reported	textfile	8.08537e-16	13	108993494	3656	0.02614	TRUE	reported	igd	2	TRUE	0.0175749	65.3674	25.0036
	rs1332199	C	T	C	T	-0.1323	-0.00384342	0.7592	FALSE	FALSE	FALSE	bTPRs3	9503477	0.905317	0.032312	outcome	TRUE	reported	textfile	5.47797e-06	9	9503477	3656	0.02906	TRUE	reported	igd	2	TRUE	0.00563725	20.7153	25.0036
	rs144440894	A	G	A	G	-0.1445	0.0198415	0.1885	FALSE	FALSE	FALSE	bTPRs3	52035313	0.50651	0.0298691	outcome	TRUE	reported	textfile	5.68002e-06	10	53795073	3656	0.03179	TRUE	reported	igd	2	TRUE	0.00561954	20.6499	25.0036
	rs144625305	T	C	T	C	0.6284	-0.111705	0.0086	FALSE	FALSE	FALSE	bTPRs3	7832045	0.268912	0.101038	outcome	TRUE	reported	textfile	2.94999e-06	7	7871676	3656	0.1342	TRUE	reported	igd	2	TRUE	0.00596162	21.9144	25.0036
	rs17708396	A	C	A	C	2.517	0.0509032	0.0005	FALSE	FALSE	FALSE	bTPRs3	149030687	0.302661	0.0493849	outcome	TRUE	reported	textfile	1.31899e-06	5	148410250	3656	0.5195	TRUE	reported	igd	2	TRUE	0.00637984	23.4616	25.0036
	rs35057381	C	T	C	T	0.1315	0.0210265	0.2211	FALSE	FALSE	FALSE	bTPRs3	26412192	0.404225	0.0252086	outcome	TRUE	reported	textfile	7.91808e-06	5	26412301	3656	0.02938	TRUE	reported	igd	2	TRUE	0.00544965	20.0221	25.0036
	rs4076316	A	T	A	T	-0.1287	0.0112908	0.3005	FALSE	TRUE	TRUE	bTPRs3	167447406	0.642084	0.0242923	outcome	TRUE	reported	textfile	1.95799e-06	6	167859623	3656	0.027	TRUE	reported	igd	2	FALSE	0.00617636	22.7087	25.0036
	rs4689417	A	C	A	C	-0.1241	-0.0296005	0.2961	FALSE	FALSE	FALSE	bTPRs3	4390666	0.32225	0.0299041	outcome	TRUE	reported	textfile	3.50598e-06	4	4392393	3656	0.02671	TRUE	reported	igd	2	TRUE	0.00586993	21.5754	25.0036
	rs4763704	A	G	A	G	0.3787	0.14952	0.9772	FALSE	FALSE	FALSE	bTPRs3	11545825	0.0652725	0.0811117	outcome	TRUE	reported	textfile	2.69699e-06	12	11698759	3656	0.08058	TRUE	reported	igd	2	TRUE	0.00600501	22.0749	25.0036
	rs557577736	G	A	G	A	1.814	0.174798	0.001	FALSE	FALSE	FALSE	bTPRs3	45649957	0.244948	0.150337	outcome	TRUE	reported	textfile	2.37099e-06	13	46224092	3656	0.3838	TRUE	reported	igd	2	TRUE	0.00607313	22.3268	25.0036
	rs6486433	G	T	G	T	-0.1102	0.0431604	0.5003	FALSE	FALSE	FALSE	bTPRs3	9573143	0.0861549	0.0251512	outcome	TRUE	reported	textfile	7.93999e-06	11	9594690	3656	0.02464	TRUE	reported	igd	2	TRUE	0.00544134	19.9914	25.0036
	rs6997704	G	A	G	A	0.1127	0.0239923	0.4707	FALSE	FALSE	FALSE	bTPRs3	139968651	0.321539	0.0242028	outcome	TRUE	reported	textfile	2.41102e-06	8	140978857	3656	0.02386	TRUE	reported	igd	2	TRUE	0.00606539	22.2982	25.0036
	rs7254039	A	G	A	G	-0.2739	0.029214	0.0435	FALSE	FALSE	FALSE	bTPRs3	14882542	0.571787	0.0516677	outcome	TRUE	reported	textfile	2.398e-06	19	14993354	3656	0.05798	TRUE	reported	igd	2	TRUE	0.00606706	22.3044	25.0036
	rs73192651	T	C	T	C	0.5056	0.0700385	0.02	FALSE	FALSE	FALSE	bTPRs3	49638749	0.446182	0.0919388	outcome	TRUE	reported	textfile	8.74601e-09	13	50212885	3656	0.08768	TRUE	reported	igd	2	TRUE	0.00901311	33.2334	25.0036
	rs74505387	C	T	C	T	-0.1838	-0.0410983	0.1057	FALSE	FALSE	FALSE	bTPRs3	101443866	0.648306	0.0901049	outcome	TRUE	reported	textfile	3.47896e-06	6	101891742	3656	0.03954	TRUE	reported	igd	2	TRUE	0.0058756	21.5963	25.0036
	rs75766272	T	C	T	C	-0.4263	-0.0296118	0.0201	FALSE	FALSE	FALSE	bTPRs3	7949925	0.521078	0.046147	outcome	TRUE	reported	textfile	5.73099e-07	1	8009985	3656	0.08511	TRUE	reported	igd	2	TRUE	0.00681543	25.0745	25.0036
	rs76720471	T	C	T	C	1.557	0.105171	0.0011	FALSE	FALSE	FALSE	bTPRs3	221410085	0.41018	0.1277	outcome	TRUE	reported	textfile	5.46399e-06	2	222274805	3656	0.3419	TRUE	reported	igd	2	TRUE	0.00564048	20.7272	25.0036
	rs77762131	C	G	C	G	0.3074	0.137884	0.045	FALSE	TRUE	TRUE	bTPRs3	95739501	0.3189	0.138337	outcome	TRUE	reported	textfile	8.06102e-08	14	96205838	3656	0.05717	TRUE	reported	igd	2	FALSE	0.00784593	28.8957	25.0036
	rs9578529	G	A	G	A	-0.1323	0.069624	0.2676	FALSE	FALSE	FALSE	bTPRs3	23039051	0.0141472	0.0283773	outcome	TRUE	reported	textfile	2.48502e-06	13	23613190	3656	0.02804	TRUE	reported	igd	2	TRUE	0.00605231	22.2498	25.0036
GCST90001443	rs11662133	C	T	C	T	0.1453	-0.00186777	0.1705	FALSE	FALSE	FALSE	MEGRiN	76722677	0.944498	0.0268289	outcome	TRUE	reported	textfile	6.52199e-06	18	74434633	3657	0.03219	TRUE	reported	igd	2	TRUE	0.00554053	20.3635	21.4417
	rs12432015	C	T	C	T	-0.1712	0.0885371	0.118	FALSE	FALSE	FALSE	MEGRiN	48583579	0.0141469	0.0360859	outcome	TRUE	reported	textfile	4.56899e-06	14	49052782	3657	0.0373	TRUE	reported	igd	2	TRUE	0.00572757	21.0549	21.4417
	rs13244540	T	G	T	G	0.2658	0.00421111	0.0447	FALSE	FALSE	FALSE	MEGRiN	151305448	0.918698	0.0412554	outcome	TRUE	reported	textfile	6.37602e-06	7	151002534	3657	0.0588	TRUE	reported	igd	2	TRUE	0.00555662	20.4229	21.4417
	rs147937648	T	C	T	C	-0.7403	0.0738813	0.0059	FALSE	FALSE	FALSE	MEGRiN	81614992	0.683838	0.181423	outcome	TRUE	reported	textfile	3.01703e-06	12	82008771	3657	0.1583	TRUE	reported	igd	2	TRUE	0.00594483	21.8583	21.4417
	rs186229706	T	G	T	G	0.4826	-0.0950082	0.0142	FALSE	FALSE	FALSE	MEGRiN	2027362	0.0964628	0.0571565	outcome	TRUE	reported	textfile	3.96598e-06	4	2029089	3657	0.1045	TRUE	reported	igd	2	TRUE	0.00579818	21.3159	21.4417
	rs252294	C	G	C	G	0.1079	-0.0385423	0.5648	FALSE	TRUE	TRUE	MEGRiN	29224212	0.106637	0.0238875	outcome	TRUE	reported	textfile	8.41395e-06	16	29235533	3657	0.02418	TRUE	reported	igd	2	FALSE	0.0054156	19.9018	21.4417
	rs34313582	A	C	A	C	-0.1598	-0.0534278	0.138	FALSE	FALSE	FALSE	MEGRiN	84007576	0.171639	0.0390852	outcome	TRUE	reported	textfile	5.39598e-06	8	84919811	3657	0.03507	TRUE	reported	igd	2	TRUE	0.00564545	20.7513	21.4417
	rs34625183	T	C	T	C	-0.1695	-0.0311558	0.1154	FALSE	FALSE	FALSE	MEGRiN	146380132	0.494079	0.0455604	outcome	TRUE	reported	textfile	7.90606e-06	3	146097919	3657	0.03789	TRUE	reported	igd	2	TRUE	0.00544246	20.001	21.4417
	rs38201	A	T	A	T	-0.1242	-0.0340746	0.2594	FALSE	TRUE	TRUE	MEGRiN	15871783	0.22002	0.0277826	outcome	TRUE	reported	textfile	8.96706e-06	7	15911408	3657	0.02794	TRUE	reported	igd	2	FALSE	0.00537434	19.7494	21.4417
	rs4244568	G	T	G	T	-0.1244	0.0429369	0.3414	FALSE	FALSE	FALSE	MEGRiN	39027714	0.0708794	0.0237712	outcome	TRUE	reported	textfile	1.98701e-06	15	39319915	3657	0.02611	TRUE	reported	igd	2	TRUE	0.006169	22.6876	21.4417
	rs4647601	A	C	A	C	0.1097	0.0099072	0.4584	FALSE	FALSE	FALSE	MEGRiN	184648878	0.676222	0.0237227	outcome	TRUE	reported	textfile	7.83303e-06	4	185570032	3657	0.02451	TRUE	reported	igd	2	TRUE	0.0054479	20.0212	21.4417
	rs4782702	G	A	G	A	0.4085	-0.0502561	0.9802	FALSE	FALSE	FALSE	MEGRiN	85443693	0.469332	0.069456	outcome	TRUE	reported	textfile	3.145e-06	16	85477299	3657	0.0875	TRUE	reported	igd	2	TRUE	0.00592465	21.7836	21.4417
	rs6052993	G	C	G	C	-0.1132	-0.0469762	0.4371	FALSE	TRUE	TRUE	MEGRiN	4964192	0.0490784	0.0238711	outcome	TRUE	reported	textfile	4.25197e-06	20	4944838	3657	0.02459	TRUE	reported	igd	2	FALSE	0.00576158	21.1806	21.4417
	rs6712095	T	G	T	G	0.3643	0.126111	0.0246	FALSE	FALSE	FALSE	MEGRiN	204758774	0.225541	0.104059	outcome	TRUE	reported	textfile	4.70901e-06	2	205623497	3657	0.07946	TRUE	reported	igd	2	TRUE	0.00571488	21.0079	21.4417
	rs72791978	T	A	T	A	0.5621	-0.0463907	0.01	FALSE	TRUE	TRUE	MEGRiN	108734371	0.752742	0.14726	outcome	TRUE	reported	textfile	7.85001e-06	5	108070072	3657	0.1256	TRUE	reported	igd	2	FALSE	0.00544692	20.0175	21.4417
	rs72825207	A	T	A	T	0.513	0.0115963	0.0149	FALSE	TRUE	TRUE	MEGRiN	61150197	0.926609	0.125892	outcome	TRUE	reported	textfile	1.37899e-06	10	62909955	3657	0.1061	TRUE	reported	igd	2	FALSE	0.00635202	23.365	21.4417
	rs75951284	T	C	T	C	0.3067	0.0412771	0.0316	FALSE	FALSE	FALSE	MEGRiN	187921008	0.615791	0.0822539	outcome	TRUE	reported	textfile	6.11801e-06	3	187638796	3657	0.06772	TRUE	reported	igd	2	TRUE	0.0055775	20.5001	21.4417
	rs77553819	C	G	C	G	-0.1257	0.0276808	0.2863	FALSE	TRUE	TRUE	MEGRiN	24308263	0.343298	0.0292093	outcome	TRUE	reported	textfile	2.99999e-06	13	24882401	3657	0.02688	TRUE	reported	igd	2	FALSE	0.00594426	21.8562	21.4417
	rs7773849	G	A	G	A	1.534	-0.04664	0.0018	FALSE	FALSE	FALSE	MEGRiN	128232373	0.233939	0.0391842	outcome	TRUE	reported	textfile	5.81099e-08	6	128553518	3657	0.2821	TRUE	reported	igd	2	TRUE	0.00802088	29.5534	21.4417
GCST90001444	rs10279688	T	C	T	C	0.4968	-0.0384416	0.0115	FALSE	FALSE	FALSE	rXZESJ	9811379	0.797386	0.149735	outcome	TRUE	reported	textfile	6.54199e-06	7	9851008	3658	0.1101	TRUE	reported	igd	2	TRUE	0.00553521	20.3494	21.8364
	rs111737298	G	A	G	A	0.2263	0.0338294	0.0596	FALSE	FALSE	FALSE	rXZESJ	54769930	0.556856	0.0575801	outcome	TRUE	reported	textfile	7.01407e-06	17	52847291	3658	0.05029	TRUE	reported	igd	2	TRUE	0.00550509	20.238	21.8364
	rs11203884	T	C	T	C	-0.1469	-0.00744051	0.1643	FALSE	FALSE	FALSE	rXZESJ	17659055	0.815723	0.0319267	outcome	TRUE	reported	textfile	6.83502e-06	8	17516564	3658	0.03262	TRUE	reported	igd	2	TRUE	0.00551354	20.2693	21.8364
	rs117308259	C	T	C	T	-0.7613	0.168591	0.0066	FALSE	FALSE	FALSE	rXZESJ	31524295	0.0405061	0.0822976	outcome	TRUE	reported	textfile	4.02096e-07	14	31993501	3658	0.1499	TRUE	reported	igd	2	TRUE	0.00700186	25.7793	21.8364
	rs118073973	A	T	A	T	0.2924	-0.0644326	0.0402	FALSE	TRUE	TRUE	rXZESJ	19948910	0.583765	0.117601	outcome	TRUE	reported	textfile	2.20999e-06	9	19948908	3658	0.06168	TRUE	reported	igd	2	FALSE	0.00610608	22.461	21.8364
	rs16955339	T	G	T	G	0.3075	0.00635096	0.0377	FALSE	FALSE	FALSE	rXZESJ	54893699	0.927146	0.0694578	outcome	TRUE	reported	textfile	8.46292e-07	17	52971060	3658	0.06234	TRUE	reported	igd	2	TRUE	0.00660745	24.3175	21.8364
	rs182720746	T	C	T	C	0.6295	0.147248	0.0089	FALSE	FALSE	FALSE	rXZESJ	112171727	0.0288383	0.0673692	outcome	TRUE	reported	textfile	1.88599e-06	4	113092883	3658	0.1319	TRUE	reported	igd	2	TRUE	0.00618817	22.7648	21.8364
	rs2215848	A	G	A	G	0.5046	-0.210587	0.0118	FALSE	FALSE	FALSE	rXZESJ	25063599	0.124791	0.137193	outcome	TRUE	reported	textfile	7.40901e-06	4	25065221	3658	0.1124	TRUE	reported	igd	2	TRUE	0.00547939	20.143	21.8364
	rs2339996	A	G	A	G	-0.1476	-0.019332	0.7802	FALSE	FALSE	FALSE	rXZESJ	173643502	0.521785	0.0301782	outcome	TRUE	reported	textfile	3.12299e-07	5	173070505	3658	0.02879	TRUE	reported	igd	2	TRUE	0.00713405	26.2695	21.8364
	rs308820	C	T	C	T	-0.1261	0.00199597	0.7571	FALSE	FALSE	FALSE	rXZESJ	88408863	0.936247	0.0249535	outcome	TRUE	reported	textfile	8.97491e-06	11	88142031	3658	0.02837	TRUE	reported	igd	2	TRUE	0.00537191	19.7458	21.8364
	rs34666228	T	G	T	G	0.1512	-0.0076956	0.2346	FALSE	FALSE	FALSE	rXZESJ	123514717	0.77809	0.0273079	outcome	TRUE	reported	textfile	8.46292e-08	11	123385425	3658	0.02817	TRUE	reported	igd	2	TRUE	0.0078141	28.7934	21.8364
	rs35639639	C	T	C	T	0.1354	0.0238006	0.2063	FALSE	FALSE	FALSE	rXZESJ	5438090	0.436944	0.0306171	outcome	TRUE	reported	textfile	6.72295e-06	16	5488091	3658	0.03002	TRUE	reported	igd	2	TRUE	0.00553049	20.3319	21.8364
	rs36071180	A	G	A	G	0.1556	-0.0420559	0.1597	FALSE	FALSE	FALSE	rXZESJ	784521	0.421923	0.0523676	outcome	TRUE	reported	textfile	3.19198e-06	20	765164	3658	0.03334	TRUE	reported	igd	2	TRUE	0.00591924	21.7696	21.8364
	rs4619804	C	A	C	A	0.1217	0.0309413	0.6963	FALSE	FALSE	FALSE	rXZESJ	18633152	0.215658	0.0249898	outcome	TRUE	reported	textfile	8.77991e-06	3	18674644	3658	0.02734	TRUE	reported	igd	2	TRUE	0.00538759	19.8037	21.8364
	rs55767134	C	G	C	G	-0.1443	-0.0574821	0.1837	FALSE	TRUE	TRUE	rXZESJ	17006436	0.0849767	0.033371	outcome	TRUE	reported	textfile	4.19402e-06	10	17048435	3658	0.03132	TRUE	reported	igd	2	FALSE	0.00576943	21.2154	21.8364
	rs59902361	A	G	A	G	-0.2517	0.0439574	0.0496	FALSE	FALSE	FALSE	rXZESJ	39706092	0.377889	0.0498501	outcome	TRUE	reported	textfile	5.53898e-06	20	38334734	3658	0.05532	TRUE	reported	igd	2	TRUE	0.0056274	20.6902	21.8364
	rs6125184	A	G	A	G	-0.1164	-0.00980525	0.5914	FALSE	FALSE	FALSE	rXZESJ	47947970	0.679527	0.0237353	outcome	TRUE	reported	textfile	2.60699e-06	20	46576714	3658	0.02472	TRUE	reported	igd	2	TRUE	0.00602478	22.1601	21.8364
	rs62311900	T	C	T	C	-0.1405	-0.027243	0.1736	FALSE	FALSE	FALSE	rXZESJ	73279470	0.464088	0.0372105	outcome	TRUE	reported	textfile	9.44191e-06	4	74145187	3658	0.03168	TRUE	reported	igd	2	TRUE	0.00534822	19.6582	21.8364
	rs6906886	A	T	A	T	0.1807	0.0155705	0.903	FALSE	TRUE	TRUE	rXZESJ	84329133	0.705732	0.0412362	outcome	TRUE	reported	textfile	8.55008e-06	6	85038851	3658	0.04053	TRUE	reported	igd	2	FALSE	0.00540463	19.8667	21.8364
	rs709082	C	A	C	A	0.1135	-0.0435398	0.3682	FALSE	FALSE	FALSE	rXZESJ	191729657	0.0713888	0.0241486	outcome	TRUE	reported	textfile	6.03698e-06	3	191447446	3658	0.02504	TRUE	reported	igd	2	TRUE	0.00558531	20.5346	21.8364
	rs75839951	G	T	G	T	-0.2457	-0.0133322	0.0585	FALSE	FALSE	FALSE	rXZESJ	34266522	0.763213	0.0442544	outcome	TRUE	reported	textfile	2.38199e-06	2	34491589	3658	0.05199	TRUE	reported	igd	2	TRUE	0.00606853	22.322	21.8364
	rs77510701	A	C	A	C	-0.2605	0.06003	0.0484	FALSE	FALSE	FALSE	rXZESJ	37258143	0.595315	0.113019	outcome	TRUE	reported	textfile	3.92103e-06	18	34838106	3658	0.05636	TRUE	reported	igd	2	TRUE	0.00580632	21.3519	21.8364
	rs78301150	A	G	A	G	-1.031	-0.0195442	0.0033	FALSE	FALSE	FALSE	rXZESJ	81839613	0.68886	0.0488112	outcome	TRUE	reported	textfile	3.84698e-06	12	82233392	3658	0.2228	TRUE	reported	igd	2	TRUE	0.0058198	21.4018	21.8364
GCST90001445	rs11068290	T	C	T	C	-0.3746	-0.0508669	0.0231	FALSE	FALSE	FALSE	FpKGBs	109790250	0.454404	0.0679954	outcome	TRUE	reported	textfile	4.21105e-06	12	110228055	3657	0.0813	TRUE	reported	igd	2	TRUE	0.00577186	21.2186	22.2156
	rs115576360	A	G	A	G	-0.4062	-0.112333	0.0194	FALSE	FALSE	FALSE	FpKGBs	156075492	0.254702	0.0986241	outcome	TRUE	reported	textfile	7.96196e-06	4	156996644	3657	0.09082	TRUE	reported	igd	2	TRUE	0.0054403	19.9931	22.2156
	rs138977782	G	A	G	A	-0.5468	0.0160148	0.0096	FALSE	FALSE	FALSE	FpKGBs	4744416	0.83723	0.0779545	outcome	TRUE	reported	textfile	8.74802e-06	9	4744416	3657	0.1228	TRUE	reported	igd	2	TRUE	0.00539246	19.8163	22.2156
	rs140191306	T	C	T	C	-0.4466	0.32811	0.0179	FALSE	FALSE	FALSE	FpKGBs	2570753	0.0332751	0.154133	outcome	TRUE	reported	textfile	2.09701e-06	9	2570753	3657	0.09399	TRUE	reported	igd	2	TRUE	0.00613587	22.5651	22.2156
	rs17405603	T	A	T	A	-0.1414	-0.0259277	0.2841	FALSE	TRUE	TRUE	FpKGBs	145228777	0.319363	0.0260378	outcome	TRUE	reported	textfile	3.47296e-07	5	144608340	3657	0.02769	TRUE	reported	igd	2	FALSE	0.00708014	26.0625	22.2156
	rs2450220	T	C	T	C	0.1668	0.0362326	0.816	FALSE	FALSE	FALSE	FpKGBs	118311162	0.451678	0.048142	outcome	TRUE	reported	textfile	1.60801e-07	8	119323401	3657	0.03177	TRUE	reported	igd	2	TRUE	0.0074812	27.5499	22.2156
	rs4691920	C	G	C	G	-0.9757	0.20528	0.9962	FALSE	TRUE	TRUE	FpKGBs	163430749	0.0476025	0.10363	outcome	TRUE	reported	textfile	2.53303e-06	4	164351901	3657	0.207	TRUE	reported	igd	2	FALSE	0.0060386	22.2052	22.2156
	rs61790670	A	C	A	C	0.1305	0.0162513	0.2301	FALSE	FALSE	FALSE	FpKGBs	83661536	0.600215	0.0310086	outcome	TRUE	reported	textfile	7.44801e-06	1	84127219	3657	0.02908	TRUE	reported	igd	2	TRUE	0.00547674	20.1277	22.2156
	rs62417843	C	T	C	T	-0.2629	-0.041921	0.0502	FALSE	FALSE	FALSE	FpKGBs	91070184	0.471415	0.0582091	outcome	TRUE	reported	textfile	2.82299e-06	6	91779902	3657	0.05605	TRUE	reported	igd	2	TRUE	0.00597999	21.9883	22.2156
	rs7215243	G	A	G	A	0.1743	-0.0498639	0.1328	FALSE	FALSE	FALSE	FpKGBs	80288006	0.0973531	0.030078	outcome	TRUE	reported	textfile	1.77501e-06	17	78261805	3657	0.03642	TRUE	reported	igd	2	TRUE	0.00622413	22.8917	22.2156
	rs7726548	G	T	G	T	-0.1903	0.110493	0.103	FALSE	FALSE	FALSE	FpKGBs	117471858	0.0315457	0.0513893	outcome	TRUE	reported	textfile	2.64503e-06	5	116807553	3657	0.04045	TRUE	reported	igd	2	TRUE	0.00601582	22.1209	22.2156
	rs7994585	C	G	C	G	-0.1137	0.0294675	0.4839	FALSE	TRUE	TRUE	FpKGBs	110431148	0.221429	0.0240996	outcome	TRUE	reported	textfile	4.94504e-06	13	111083495	3657	0.02485	TRUE	reported	igd	2	FALSE	0.00569199	20.9233	22.2156
	rs9265864	T	C	T	C	-0.1444	0.0826238	0.4642	FALSE	FALSE	FALSE	FpKGBs	31344970	0.00498104	0.0294217	outcome	TRUE	reported	textfile	3.97997e-06	6	31312747	3657	0.03125	TRUE	reported	igd	2	TRUE	0.00580472	21.3401	22.2156
GCST90001446	rs112964950	C	G	C	G	0.6003	0.189697	0.0083	FALSE	TRUE	TRUE	WRYtWg	73648345	0.346411	0.201468	outcome	TRUE	reported	textfile	9.57194e-06	3	73697496	3656	0.1354	TRUE	reported	igd	2	FALSE	0.00534767	19.6454	22.6786
	rs115218350	A	T	A	T	-1.898	0.0515466	0.0008	FALSE	TRUE	TRUE	WRYtWg	104428039	0.588796	0.0953539	outcome	TRUE	reported	textfile	3.408e-06	3	104146883	3656	0.408	TRUE	reported	igd	2	FALSE	0.00588441	21.6289	22.6786
	rs118121266	T	C	T	C	0.7592	-0.0770592	0.0055	FALSE	FALSE	FALSE	WRYtWg	20091824	0.580303	0.139362	outcome	TRUE	reported	textfile	6.02296e-06	10	20380753	3656	0.1675	TRUE	reported	igd	2	TRUE	0.00558783	20.5327	22.6786
	rs144295598	A	G	A	G	0.5677	0.0866662	0.0103	FALSE	FALSE	FALSE	WRYtWg	44768291	0.491261	0.125912	outcome	TRUE	reported	textfile	3.77703e-06	22	45164171	3656	0.1226	TRUE	reported	igd	2	TRUE	0.00583057	21.4299	22.6786
	rs144625305	T	C	T	C	0.6143	-0.111705	0.0086	FALSE	FALSE	FALSE	WRYtWg	7832045	0.268912	0.101038	outcome	TRUE	reported	textfile	8.95695e-06	7	7871676	3656	0.1381	TRUE	reported	igd	2	TRUE	0.00538299	19.7759	22.6786
	rs421516	A	C	A	C	-0.3138	-0.133276	0.9583	FALSE	FALSE	FALSE	WRYtWg	65139471	0.546699	0.221126	outcome	TRUE	reported	textfile	8.60399e-07	17	63135589	3656	0.06366	TRUE	reported	igd	2	TRUE	0.00660221	24.2848	22.6786
	rs4697617	A	G	A	G	0.1401	0.00796628	0.7103	FALSE	FALSE	FALSE	WRYtWg	25769493	0.771873	0.0274771	outcome	TRUE	reported	textfile	3.38602e-07	4	25771115	3656	0.02742	TRUE	reported	igd	2	TRUE	0.00708998	26.0918	22.6786
	rs56741207	G	C	G	C	-1.445	0.0324421	0.0018	FALSE	TRUE	TRUE	WRYtWg	133812508	0.7206	0.0907071	outcome	TRUE	reported	textfile	7.03704e-07	4	134733663	3656	0.2907	TRUE	reported	igd	2	FALSE	0.00671296	24.6949	22.6786
	rs61790670	A	C	A	C	0.142	0.0162513	0.23	FALSE	FALSE	FALSE	WRYtWg	83661536	0.600215	0.0310086	outcome	TRUE	reported	textfile	1.409e-06	1	84127219	3656	0.0294	TRUE	reported	igd	2	TRUE	0.00634035	23.3155	22.6786
	rs62521107	T	C	T	C	-0.2685	-0.148484	0.058	FALSE	FALSE	FALSE	WRYtWg	117839715	0.357608	0.161408	outcome	TRUE	reported	textfile	8.90902e-07	8	118851954	3656	0.05455	TRUE	reported	igd	2	TRUE	0.00658301	24.2137	22.6786
	rs75524570	C	T	C	T	0.2161	-0.0345959	0.0673	FALSE	FALSE	FALSE	WRYtWg	192187269	0.421593	0.0430479	outcome	TRUE	reported	textfile	8.81698e-06	3	191905058	3656	0.04856	TRUE	reported	igd	2	TRUE	0.00538766	19.7931	22.6786
	rs77146037	G	A	G	A	-0.2726	-0.328009	0.0472	FALSE	FALSE	FALSE	WRYtWg	178226039	0.640994	0.703415	outcome	TRUE	reported	textfile	4.81903e-06	1	178195174	3656	0.05953	TRUE	reported	igd	2	TRUE	0.00570282	20.9576	22.6786
	rs77741094	G	C	G	C	-0.627	-0.132253	0.0126	FALSE	TRUE	TRUE	WRYtWg	40990492	0.0866483	0.07719	outcome	TRUE	reported	textfile	3.13899e-08	21	42362418	3656	0.1131	TRUE	reported	igd	2	FALSE	0.0083362	30.7165	22.6786
	rs79416092	C	T	C	T	-0.4181	-0.00613715	0.0197	FALSE	FALSE	FALSE	WRYtWg	6666337	0.941901	0.0842082	outcome	TRUE	reported	textfile	6.38807e-06	12	6775503	3656	0.0925	TRUE	reported	igd	2	TRUE	0.00555713	20.4192	22.6786
GCST90001447	rs11002952	A	G	A	G	-1.169	-0.0776006	0.0023	FALSE	FALSE	FALSE	V6BEgd	79385421	0.315969	0.0773858	outcome	TRUE	reported	textfile	6.53296e-06	10	81145177	3657	0.2589	TRUE	reported	igd	2	TRUE	0.00554403	20.3764	22.0346
	rs11068290	T	C	T	C	0.3556	-0.0508669	0.0231	FALSE	FALSE	FALSE	V6BEgd	109790250	0.454404	0.0679954	outcome	TRUE	reported	textfile	7.12607e-06	12	110228055	3657	0.07908	TRUE	reported	igd	2	TRUE	0.00549883	20.2094	22.0346
	rs117772462	A	T	A	T	-0.4299	-0.145778	0.0159	FALSE	TRUE	TRUE	V6BEgd	48751421	0.346094	0.154722	outcome	TRUE	reported	textfile	8.29602e-06	7	48791017	3657	0.0963	TRUE	reported	igd	2	FALSE	0.00541997	19.918	22.0346
	rs13196511	A	G	A	G	-0.2113	-0.0154874	0.0913	FALSE	FALSE	FALSE	V6BEgd	44675459	0.831202	0.072656	outcome	TRUE	reported	textfile	6.72094e-07	6	44643196	3657	0.04244	TRUE	reported	igd	2	TRUE	0.0067327	24.7748	22.0346
	rs139996875	T	A	T	A	0.6715	-0.116314	0.0063	FALSE	TRUE	TRUE	V6BEgd	78714518	0.21457	0.0937188	outcome	TRUE	reported	textfile	4.689e-06	5	78010341	3657	0.1465	TRUE	reported	igd	2	FALSE	0.00571221	20.9981	22.0346
	rs140380950	C	T	C	T	-0.3401	-0.0128184	0.0368	FALSE	FALSE	FALSE	V6BEgd	104971345	0.958707	0.247576	outcome	TRUE	reported	textfile	9.31001e-08	2	105587803	3657	0.06356	TRUE	reported	igd	2	TRUE	0.00776844	28.6159	22.0346
	rs147226531	C	T	C	T	0.517	0.0375849	0.0115	FALSE	FALSE	FALSE	V6BEgd	54652862	0.872737	0.234638	outcome	TRUE	reported	textfile	7.20593e-06	16	54686774	3657	0.115	TRUE	reported	igd	2	TRUE	0.00549625	20.1998	22.0346
	rs16867231	A	G	A	G	-0.547	-0.0321788	0.0108	FALSE	FALSE	FALSE	V6BEgd	180185296	0.667275	0.0748534	outcome	TRUE	reported	textfile	1.60199e-06	2	181050023	3657	0.1138	TRUE	reported	igd	2	TRUE	0.00627813	23.0915	22.0346
	rs17278914	C	T	C	T	-0.676	-0.0189541	0.0057	FALSE	FALSE	FALSE	V6BEgd	44126488	0.896813	0.146151	outcome	TRUE	reported	textfile	8.603e-06	14	44595691	3657	0.1517	TRUE	reported	igd	2	TRUE	0.00540064	19.8465	22.0346
	rs17739715	C	A	C	A	0.8693	-0.0174882	0.0037	FALSE	FALSE	FALSE	V6BEgd	10099947	0.782081	0.0632239	outcome	TRUE	reported	textfile	9.46303e-06	8	9957457	3657	0.196	TRUE	reported	igd	2	TRUE	0.00535023	19.6603	22.0346
	rs17771512	A	C	A	C	-0.188	0.00941846	0.0928	FALSE	FALSE	FALSE	V6BEgd	119035641	0.835576	0.0453779	outcome	TRUE	reported	textfile	6.49995e-06	8	120047880	3657	0.04163	TRUE	reported	igd	2	TRUE	0.00554578	20.3829	22.0346
	rs2216762	C	T	C	T	-0.1464	0.0173648	0.8141	FALSE	FALSE	FALSE	V6BEgd	84725840	0.588329	0.0320823	outcome	TRUE	reported	textfile	2.26199e-06	16	84759446	3657	0.03092	TRUE	reported	igd	2	TRUE	0.0060929	22.4061	22.0346
	rs2362966	C	G	C	G	-0.2556	-0.053928	0.0556	FALSE	TRUE	TRUE	V6BEgd	123801171	0.357624	0.0586236	outcome	TRUE	reported	textfile	1.137e-06	10	125560687	3657	0.05243	TRUE	reported	igd	2	FALSE	0.0064569	23.7533	22.0346
	rs28393044	G	C	G	C	0.3089	-0.0378251	0.0334	FALSE	TRUE	TRUE	V6BEgd	156516687	0.292404	0.035926	outcome	TRUE	reported	textfile	4.24502e-06	4	157437839	3657	0.06706	TRUE	reported	igd	2	FALSE	0.00576861	21.2066	22.0346
	rs4903967	A	G	A	G	-0.1368	-0.0350111	0.6906	FALSE	FALSE	FALSE	V6BEgd	81018805	0.254531	0.0307274	outcome	TRUE	reported	textfile	5.77697e-07	14	81485149	3657	0.02733	TRUE	reported	igd	2	TRUE	0.0068046	25.0412	22.0346
	rs59879144	A	C	A	C	-0.4658	-0.133328	0.0161	FALSE	FALSE	FALSE	V6BEgd	75170669	0.158463	0.0945416	outcome	TRUE	reported	textfile	1.39801e-06	12	75564449	3657	0.09637	TRUE	reported	igd	2	TRUE	0.00634782	23.3495	22.0346
	rs61880664	G	A	G	A	0.1564	-0.0102501	0.1389	FALSE	FALSE	FALSE	V6BEgd	15321986	0.836309	0.0496092	outcome	TRUE	reported	textfile	8.43898e-06	11	15343532	3657	0.03506	TRUE	reported	igd	2	TRUE	0.00541213	19.889	22.0346
	rs72927038	T	C	T	C	-0.33	0.10397	0.0335	FALSE	FALSE	FALSE	V6BEgd	54234569	0.471897	0.144524	outcome	TRUE	reported	textfile	1.237e-06	18	51760939	3657	0.06793	TRUE	reported	igd	2	TRUE	0.00641189	23.5867	22.0346
	rs74907325	T	A	T	A	0.2307	-0.00843333	0.0666	FALSE	TRUE	TRUE	V6BEgd	218256337	0.838706	0.0414313	outcome	TRUE	reported	textfile	1.793e-06	1	218429679	3657	0.04822	TRUE	reported	igd	2	FALSE	0.00622022	22.8772	22.0346
	rs76084861	T	G	T	G	0.2748	0.0690666	0.0368	FALSE	FALSE	FALSE	V6BEgd	15974417	0.0973957	0.0416664	outcome	TRUE	reported	textfile	9.3821e-06	2	16114539	3657	0.06192	TRUE	reported	igd	2	TRUE	0.0053569	19.6849	22.0346
	rs76112278	A	G	A	G	-0.4136	-0.0834585	0.0194	FALSE	FALSE	FALSE	V6BEgd	15913446	0.379489	0.0949645	outcome	TRUE	reported	textfile	2.26699e-06	4	15915069	3657	0.08735	TRUE	reported	igd	2	TRUE	0.00609335	22.4077	22.0346
	rs76840770	A	C	A	C	0.3538	-0.18287	0.0246	FALSE	FALSE	FALSE	V6BEgd	54347299	0.357582	0.198776	outcome	TRUE	reported	textfile	5.42101e-06	14	54814017	3657	0.07769	TRUE	reported	igd	2	TRUE	0.00563903	20.7275	22.0346
	rs78658073	A	G	A	G	1.714	0.204834	0.001	FALSE	FALSE	FALSE	V6BEgd	498658	0.0144208	0.0837216	outcome	TRUE	reported	textfile	4.15796e-06	5	498773	3657	0.3719	TRUE	reported	igd	2	TRUE	0.0057747	21.2291	22.0346
	rs79487320	G	C	G	C	-0.6854	-0.0336125	0.0074	FALSE	TRUE	TRUE	V6BEgd	43247893	0.411	0.0408844	outcome	TRUE	reported	textfile	8.87708e-07	14	43717096	3657	0.1392	TRUE	reported	igd	2	FALSE	0.0065859	24.231	22.0346
	rs8059803	A	G	A	G	-0.122	-0.0450101	0.6504	FALSE	FALSE	FALSE	V6BEgd	81569396	0.121713	0.0290833	outcome	TRUE	reported	textfile	2.28802e-06	16	81603001	3657	0.02577	TRUE	reported	igd	2	TRUE	0.00609133	22.4003	22.0346
GCST90001448	rs113451095	C	T	C	T	-0.2994	-0.0341529	0.0472	FALSE	FALSE	FALSE	Muevob	10071721	0.474957	0.0478038	outcome	TRUE	reported	textfile	2.16601e-06	17	9975038	3020	0.06307	TRUE	reported	igd	2	TRUE	0.00740666	22.5201	21.1796
	rs113800324	T	C	T	C	0.2681	0.0517231	0.05	FALSE	FALSE	FALSE	Muevob	69372826	0.491925	0.0752609	outcome	TRUE	reported	textfile	8.051e-06	12	69766606	3020	0.05996	TRUE	reported	igd	2	TRUE	0.00657655	19.9794	21.1796
	rs114693598	T	G	T	G	-0.1756	-0.0682955	0.1422	FALSE	FALSE	FALSE	Muevob	161530922	0.182641	0.0512472	outcome	TRUE	reported	textfile	4.05602e-06	1	161500712	3020	0.03803	TRUE	reported	igd	2	TRUE	0.00701026	21.3063	21.1796
	rs13104041	A	G	A	G	0.6966	0.0176	0.0073	FALSE	FALSE	FALSE	Muevob	172648298	0.730257	0.0510467	outcome	TRUE	reported	textfile	9.01405e-06	4	173569449	3020	0.1566	TRUE	reported	igd	2	TRUE	0.00650939	19.7741	21.1796
	rs150248455	A	G	A	G	0.25	-0.0332917	0.0674	FALSE	FALSE	FALSE	Muevob	44953256	0.845362	0.170692	outcome	TRUE	reported	textfile	1.59901e-06	21	46373171	3020	0.05201	TRUE	reported	igd	2	TRUE	0.00759258	23.0897	21.1796
	rs151194174	A	G	A	G	-0.3546	0.0866966	0.0305	FALSE	FALSE	FALSE	Muevob	20956159	0.163054	0.0621538	outcome	TRUE	reported	textfile	5.91902e-06	7	20995778	3020	0.07814	TRUE	reported	igd	2	TRUE	0.00677286	20.5799	21.1796
	rs2295270	A	G	A	G	0.1506	-0.0126093	0.1901	FALSE	FALSE	FALSE	Muevob	47248826	0.838258	0.0617734	outcome	TRUE	reported	textfile	9.64695e-06	6	47216562	3020	0.03397	TRUE	reported	igd	2	TRUE	0.00646598	19.6413	21.1796
	rs2404849	G	T	G	T	0.1562	0.104185	0.7464	FALSE	FALSE	FALSE	Muevob	224085090	0.0145794	0.0426521	outcome	TRUE	reported	textfile	2.98003e-07	1	224272792	3020	0.03041	TRUE	reported	igd	2	TRUE	0.00866053	26.3658	21.1796
	rs2587473	T	C	T	C	-0.1429	-0.0331852	0.2432	FALSE	FALSE	FALSE	Muevob	70756029	0.182448	0.0248904	outcome	TRUE	reported	textfile	4.55198e-06	10	72515785	3020	0.0311	TRUE	reported	igd	2	TRUE	0.00694242	21.0987	21.1796
	rs34936922	G	T	G	T	-0.1256	0.0211983	0.3124	FALSE	FALSE	FALSE	Muevob	115320437	0.447856	0.0279294	outcome	TRUE	reported	textfile	9.7681e-06	12	115758242	3020	0.02836	TRUE	reported	igd	2	TRUE	0.0064528	19.601	21.1796
	rs72724781	G	A	G	A	0.9648	0.0155648	0.0041	FALSE	FALSE	FALSE	Muevob	88861380	0.784945	0.0570387	outcome	TRUE	reported	textfile	1.95299e-06	1	89327063	3020	0.2024	TRUE	reported	igd	2	TRUE	0.00746778	22.7073	21.1796
	rs72830905	G	C	G	C	0.8103	0.0741304	0.0058	FALSE	TRUE	TRUE	Muevob	83378725	0.538598	0.12055	outcome	TRUE	reported	textfile	5.73905e-06	10	85138481	3020	0.1783	TRUE	reported	igd	2	FALSE	0.00679238	20.6396	21.1796
	rs72835655	T	G	T	G	0.2511	0.00250731	0.0594	FALSE	FALSE	FALSE	Muevob	167922994	0.962463	0.0532759	outcome	TRUE	reported	textfile	9.04503e-06	5	167349999	3020	0.05647	TRUE	reported	igd	2	TRUE	0.00650454	19.7592	21.1796
	rs73445777	G	T	G	T	-0.4778	0.040324	0.0151	FALSE	FALSE	FALSE	Muevob	49427727	0.361898	0.0442267	outcome	TRUE	reported	textfile	5.93103e-06	18	46954097	3020	0.1053	TRUE	reported	igd	2	TRUE	0.00677139	20.5754	21.1796
	rs74610143	T	C	T	C	0.5582	-0.25175	0.0124	FALSE	FALSE	FALSE	Muevob	173026751	0.086808	0.147009	outcome	TRUE	reported	textfile	7.76909e-06	3	172744541	3020	0.1246	TRUE	reported	igd	2	TRUE	0.00660176	20.0565	21.1796
GCST90001449	rs10227905	G	T	G	T	0.1214	-0.0142559	0.3971	FALSE	FALSE	FALSE	p8fcfb	122435207	0.551997	0.0239688	outcome	TRUE	reported	textfile	7.70602e-06	7	122075261	3043	0.0271	TRUE	reported	igd	2	TRUE	0.00655152	20.0546	22.2632
	rs115058278	A	T	A	T	0.4772	-0.0165464	0.0168	FALSE	TRUE	TRUE	p8fcfb	102196834	0.855213	0.0906798	outcome	TRUE	reported	textfile	3.10699e-06	3	101915678	3043	0.1021	TRUE	reported	igd	2	FALSE	0.00712756	21.8305	22.2632
	rs11610005	G	C	G	C	-0.124	0.00183792	0.4358	FALSE	TRUE	TRUE	p8fcfb	27813277	0.938519	0.0238286	outcome	TRUE	reported	textfile	4.532e-06	12	27966210	3043	0.02698	TRUE	reported	igd	2	FALSE	0.00689371	21.1093	22.2632
	rs11766273	A	G	A	G	0.591	-0.0256043	0.0115	FALSE	FALSE	FALSE	p8fcfb	22736044	0.430311	0.0324656	outcome	TRUE	reported	textfile	4.23399e-06	7	22775663	3043	0.1283	TRUE	reported	igd	2	TRUE	0.00692471	21.2049	22.2632
	rs117909439	T	C	T	C	-0.6761	-0.161562	0.0089	FALSE	FALSE	FALSE	p8fcfb	29449004	0.0617988	0.0865017	outcome	TRUE	reported	textfile	1.81201e-06	14	29918210	3043	0.1414	TRUE	reported	igd	2	TRUE	0.00745711	22.8474	22.2632
	rs11921245	C	T	C	T	0.1661	0.0207145	0.1456	FALSE	FALSE	FALSE	p8fcfb	65590845	0.478692	0.0292409	outcome	TRUE	reported	textfile	8.53395e-06	3	65576520	3043	0.03726	TRUE	reported	igd	2	TRUE	0.00648821	19.8595	22.2632
	rs13186506	T	A	T	A	-0.1934	0.0209455	0.104	FALSE	TRUE	TRUE	p8fcfb	59816089	0.604954	0.0404908	outcome	TRUE	reported	textfile	6.99697e-06	5	59111915	3043	0.04296	TRUE	reported	igd	2	FALSE	0.00661606	20.2534	22.2632
	rs13241407	G	A	G	A	-0.28	-0.0355197	0.0483	FALSE	FALSE	FALSE	p8fcfb	153987735	0.592895	0.0664359	outcome	TRUE	reported	textfile	4.94698e-06	7	153684820	3043	0.06121	TRUE	reported	igd	2	TRUE	0.00682957	20.9115	22.2632
	rs1381984	A	G	A	G	-0.1569	0.00977275	0.1661	FALSE	FALSE	FALSE	p8fcfb	54038765	0.72189	0.0274566	outcome	TRUE	reported	textfile	7.19598e-06	20	52655304	3043	0.0349	TRUE	reported	igd	2	TRUE	0.00659809	20.1981	22.2632
	rs17689291	C	G	C	G	-0.575	0.0829975	0.0107	FALSE	TRUE	TRUE	p8fcfb	93025002	0.191652	0.0635652	outcome	TRUE	reported	textfile	9.29694e-06	8	94037230	3043	0.1295	TRUE	reported	igd	2	FALSE	0.00643709	19.702	22.2632
	rs191730825	G	A	G	A	0.4346	-1.23404	0.0292	FALSE	FALSE	FALSE	p8fcfb	46147567	0.00867042	0.470149	outcome	TRUE	reported	textfile	7.006e-08	1	46613239	3043	0.08042	TRUE	reported	igd	2	TRUE	0.00950607	29.1854	22.2632
	rs35149557	C	T	C	T	0.1579	0.0592949	0.198	FALSE	FALSE	FALSE	p8fcfb	5441035	0.105751	0.0366564	outcome	TRUE	reported	textfile	1.79602e-06	20	5421681	3043	0.03301	TRUE	reported	igd	2	TRUE	0.00746308	22.8659	22.2632
	rs35237330	A	G	A	G	-0.2147	0.0153256	0.0971	FALSE	FALSE	FALSE	p8fcfb	181847590	0.778978	0.0546075	outcome	TRUE	reported	textfile	1.76901e-06	4	182768743	3043	0.04484	TRUE	reported	igd	2	TRUE	0.00747775	22.9112	22.2632
	rs4922033	T	C	T	C	0.1211	-0.025627	0.3899	FALSE	FALSE	FALSE	p8fcfb	19468792	0.294049	0.0244234	outcome	TRUE	reported	textfile	7.22404e-06	8	19326303	3043	0.02694	TRUE	reported	igd	2	TRUE	0.00659655	20.1933	22.2632
	rs57566659	C	G	C	G	0.3158	-0.0167169	0.0462	FALSE	TRUE	TRUE	p8fcfb	42579441	0.702865	0.043824	outcome	TRUE	reported	textfile	4.66702e-07	12	42973243	3043	0.06253	TRUE	reported	igd	2	FALSE	0.00831228	25.4895	22.2632
	rs62002392	G	A	G	A	0.1924	0.0142357	0.1119	FALSE	FALSE	FALSE	p8fcfb	36908078	0.750829	0.04483	outcome	TRUE	reported	textfile	5.50605e-06	15	37200279	3043	0.04225	TRUE	reported	igd	2	TRUE	0.0067687	20.7239	22.2632
	rs73073066	T	C	T	C	0.4148	-0.0254828	0.023	FALSE	FALSE	FALSE	p8fcfb	23447351	0.611609	0.050185	outcome	TRUE	reported	textfile	2.377e-06	7	23486970	3043	0.08775	TRUE	reported	igd	2	TRUE	0.0072896	22.3305	22.2632
	rs74610143	T	C	T	C	0.6366	-0.25175	0.0125	FALSE	FALSE	FALSE	p8fcfb	173026751	0.086808	0.147009	outcome	TRUE	reported	textfile	3.36597e-07	3	172744541	3043	0.1245	TRUE	reported	igd	2	TRUE	0.00851877	26.1282	22.2632
	rs75256410	T	C	T	C	0.545	0.0681003	0.0122	FALSE	FALSE	FALSE	p8fcfb	177487226	0.675178	0.16251	outcome	TRUE	reported	textfile	6.05494e-06	5	176914227	3043	0.1202	TRUE	reported	igd	2	TRUE	0.00671055	20.5446	22.2632
	rs76968110	A	G	A	G	-0.4763	0.0511202	0.0189	FALSE	FALSE	FALSE	p8fcfb	30691617	0.684435	0.125782	outcome	TRUE	reported	textfile	6.82402e-07	14	31160823	3043	0.0957	TRUE	reported	igd	2	TRUE	0.00807448	24.7544	22.2632
	rs8065103	G	A	G	A	0.1465	0.0342518	0.7212	FALSE	FALSE	FALSE	p8fcfb	46985110	0.175538	0.0252851	outcome	TRUE	reported	textfile	8.10793e-07	17	45062476	3043	0.02963	TRUE	reported	igd	2	TRUE	0.00796957	24.4302	22.2632
GCST90001450	rs11249570	A	G	A	G	-0.1525	-0.0183198	0.4581	FALSE	FALSE	FALSE	iZX4LE	177606793	0.458131	0.0246923	outcome	TRUE	reported	textfile	7.66302e-09	5	177033794	3019	0.02632	TRUE	reported	igd	2	TRUE	0.0109977	33.549	25.0388
	rs116691483	A	G	A	G	0.3974	-0.166197	0.0235	FALSE	FALSE	FALSE	iZX4LE	112119397	0.0530042	0.0858954	outcome	TRUE	reported	textfile	9.3261e-06	11	111990120	3019	0.0895	TRUE	reported	igd	2	TRUE	0.00648813	19.7025	25.0388
	rs11935230	C	G	C	G	0.1842	-0.0194417	0.1686	FALSE	TRUE	TRUE	iZX4LE	135526721	0.469092	0.0268548	outcome	TRUE	reported	textfile	3.498e-07	4	136447876	3019	0.03607	TRUE	reported	igd	2	FALSE	0.00856423	26.0615	25.0388
	rs13068785	T	C	T	C	0.269	-0.0426817	0.0581	FALSE	FALSE	FALSE	iZX4LE	74654512	0.547093	0.0708854	outcome	TRUE	reported	textfile	4.61604e-06	3	74703663	3019	0.05861	TRUE	reported	igd	2	TRUE	0.00692912	21.051	25.0388
	rs143153359	T	C	T	C	2.05	-0.00335862	0.0013	FALSE	FALSE	FALSE	iZX4LE	73530672	0.967763	0.0831047	outcome	TRUE	reported	textfile	4.11898e-07	9	76145588	3019	0.4039	TRUE	reported	igd	2	TRUE	0.00846071	25.7438	25.0388
	rs146793376	G	T	G	T	0.4639	-0.158861	0.0171	FALSE	FALSE	FALSE	iZX4LE	31764334	0.132385	0.105572	outcome	TRUE	reported	textfile	8.43801e-06	16	31775655	3019	0.104	TRUE	reported	igd	2	TRUE	0.00654736	19.8836	25.0388
	rs17082777	A	G	A	G	-0.2033	0.0247865	0.1014	FALSE	FALSE	FALSE	iZX4LE	62495609	0.412363	0.0302369	outcome	TRUE	reported	textfile	6.95505e-06	4	63361327	3019	0.04515	TRUE	reported	igd	2	TRUE	0.00667097	20.2615	25.0388
	rs1800973	A	C	A	C	0.222	0.0356222	0.083	FALSE	FALSE	FALSE	iZX4LE	69350234	0.501493	0.052998	outcome	TRUE	reported	textfile	5.12201e-06	12	69744014	3019	0.04861	TRUE	reported	igd	2	TRUE	0.00686122	20.8433	25.0388
	rs1907980	T	G	T	G	0.1274	-0.0165839	0.3596	FALSE	FALSE	FALSE	iZX4LE	4857863	0.580592	0.0300151	outcome	TRUE	reported	textfile	5.45205e-06	4	4859590	3019	0.02798	TRUE	reported	igd	2	TRUE	0.00682037	20.7184	25.0388
	rs278949	A	G	A	G	0.1235	0.00432712	0.5561	FALSE	FALSE	FALSE	iZX4LE	40459695	0.876369	0.027814	outcome	TRUE	reported	textfile	6.86894e-06	4	40461712	3019	0.02741	TRUE	reported	igd	2	TRUE	0.00667947	20.2875	25.0388
	rs435806	C	T	C	T	-0.1417	-0.0373096	0.2448	FALSE	FALSE	FALSE	iZX4LE	2993429	0.186978	0.028274	outcome	TRUE	reported	textfile	6.08303e-06	19	2993427	3019	0.03127	TRUE	reported	igd	2	TRUE	0.0067558	20.5209	25.0388
	rs4484736	A	G	A	G	-0.1386	-0.00201361	0.7173	FALSE	FALSE	FALSE	iZX4LE	65147002	0.947874	0.0308003	outcome	TRUE	reported	textfile	4.36797e-06	8	66059237	3019	0.03012	TRUE	reported	igd	2	TRUE	0.00696495	21.1606	25.0388
	rs4656708	C	A	C	A	-0.3696	-0.0476213	0.0459	FALSE	FALSE	FALSE	iZX4LE	169732325	0.645702	0.103583	outcome	TRUE	reported	textfile	1.21801e-08	1	169701466	3019	0.0647	TRUE	reported	igd	2	TRUE	0.0106936	32.6113	25.0388
	rs4899265	C	A	C	A	0.139	0.0201094	0.3475	FALSE	FALSE	FALSE	iZX4LE	68854844	0.43196	0.0255897	outcome	TRUE	reported	textfile	1.213e-06	14	69321561	3019	0.02858	TRUE	reported	igd	2	TRUE	0.00777414	23.6384	25.0388
	rs4987369	T	G	T	G	0.2378	0.0276333	0.2774	FALSE	FALSE	FALSE	iZX4LE	169693601	0.301342	0.026736	outcome	TRUE	reported	textfile	3.6116e-15	1	169662742	3019	0.03006	TRUE	reported	igd	2	TRUE	0.0203082	62.54	25.0388
	rs528135834	G	T	G	T	0.859	0.0184819	0.0056	FALSE	FALSE	FALSE	iZX4LE	41322647	0.832566	0.0874213	outcome	TRUE	reported	textfile	2.75201e-06	7	41362245	3019	0.1829	TRUE	reported	igd	2	TRUE	0.00725328	22.043	25.0388
	rs530377	C	T	C	T	0.1627	-0.0231065	0.2211	FALSE	FALSE	FALSE	iZX4LE	132462234	0.381741	0.0264167	outcome	TRUE	reported	textfile	6.12506e-07	9	135337621	3019	0.03256	TRUE	reported	igd	2	TRUE	0.00820287	24.9528	25.0388
	rs62167331	A	G	A	G	-0.347	-0.0271327	0.0341	FALSE	FALSE	FALSE	iZX4LE	56297258	0.619976	0.0547158	outcome	TRUE	reported	textfile	3.47896e-06	2	56524393	3019	0.07464	TRUE	reported	igd	2	TRUE	0.00710812	21.5987	25.0388
	rs77287889	A	G	A	G	0.352	-0.0512349	0.0301	FALSE	FALSE	FALSE	iZX4LE	88194881	0.421119	0.063687	outcome	TRUE	reported	textfile	9.29694e-06	10	89954638	3019	0.07927	TRUE	reported	igd	2	TRUE	0.00648899	19.7052	25.0388
	rs79930588	G	T	G	T	1.724	-0.00893357	0.0015	FALSE	FALSE	FALSE	iZX4LE	6307898	0.885911	0.0622635	outcome	TRUE	reported	textfile	1.048e-06	5	6308011	3019	0.3525	TRUE	reported	igd	2	TRUE	0.00786078	23.9039	25.0388
GCST90001451	rs11249570	A	G	A	G	-0.1315	-0.0183198	0.4578	FALSE	FALSE	FALSE	L0CN41	177606793	0.458131	0.0246923	outcome	TRUE	reported	textfile	6.29506e-07	5	177033794	3042	0.02634	TRUE	reported	igd	2	TRUE	0.00812675	24.9077	28.134
	rs11694457	C	T	C	T	0.5758	-0.0414737	0.0113	FALSE	FALSE	FALSE	L0CN41	356029	0.52417	0.0651148	outcome	TRUE	reported	textfile	9.34609e-06	2	356029	3042	0.1297	TRUE	reported	igd	2	TRUE	0.00643724	19.696	28.134
	rs117309559	G	A	G	A	0.5719	0.0868448	0.013	FALSE	FALSE	FALSE	L0CN41	30561098	0.122564	0.0562429	outcome	TRUE	reported	textfile	2.071e-06	14	31030304	3042	0.1203	TRUE	reported	igd	2	TRUE	0.00737454	22.5852	28.134
	rs141287837	C	T	C	T	0.3492	-0.118349	0.0306	FALSE	FALSE	FALSE	L0CN41	98616957	0.257614	0.104544	outcome	TRUE	reported	textfile	9.03005e-06	1	99082513	3042	0.07853	TRUE	reported	igd	2	TRUE	0.00645809	19.7602	28.134
	rs17624563	G	C	G	C	-0.2904	-0.0102662	0.0569	FALSE	TRUE	TRUE	L0CN41	111120565	0.791954	0.0389203	outcome	TRUE	reported	textfile	5.01695e-07	5	110456263	3042	0.05766	TRUE	reported	igd	2	FALSE	0.00826948	25.3489	28.134
	rs1816932	A	G	A	G	0.1467	0.0505832	0.2855	FALSE	FALSE	FALSE	L0CN41	55905248	0.0357866	0.0240947	outcome	TRUE	reported	textfile	7.76694e-07	4	56771414	3042	0.02962	TRUE	reported	igd	2	TRUE	0.00799913	24.5135	28.134
	rs2124027	G	C	G	C	-0.4256	0.00828221	0.0212	FALSE	TRUE	TRUE	L0CN41	15083602	0.786794	0.0306208	outcome	TRUE	reported	textfile	6.38602e-06	8	14941111	3042	0.09413	TRUE	reported	igd	2	FALSE	0.00667543	20.4297	28.134
	rs2399610	G	A	G	A	-0.1315	-0.0154672	0.4988	FALSE	FALSE	FALSE	L0CN41	5737683	0.510748	0.023518	outcome	TRUE	reported	textfile	1.37101e-06	5	5737796	3042	0.02718	TRUE	reported	igd	2	TRUE	0.00763597	23.392	28.134
	rs36141595	G	A	G	A	-0.1512	0.014122	0.2516	FALSE	FALSE	FALSE	L0CN41	32847365	0.715329	0.0387213	outcome	TRUE	reported	textfile	2.34002e-06	4	32848987	3042	0.03196	TRUE	reported	igd	2	TRUE	0.00730377	22.3668	28.134
	rs45487297	A	T	A	T	0.6623	0.290642	0.0135	FALSE	TRUE	TRUE	L0CN41	29683913	0.0378085	0.139939	outcome	TRUE	reported	textfile	3.74498e-08	14	30153119	3042	0.1201	TRUE	reported	igd	2	FALSE	0.00989793	30.3905	28.134
	rs4656708	C	A	C	A	-0.3294	-0.0476213	0.0457	FALSE	FALSE	FALSE	L0CN41	169732325	0.645702	0.103583	outcome	TRUE	reported	textfile	3.93496e-07	1	169701466	3042	0.06481	TRUE	reported	igd	2	TRUE	0.00842038	25.8153	28.134
	rs4899389	A	G	A	G	-0.1913	0.00694971	0.132	FALSE	FALSE	FALSE	L0CN41	71201146	0.802816	0.0278318	outcome	TRUE	reported	textfile	1.281e-06	14	71667863	3042	0.03943	TRUE	reported	igd	2	TRUE	0.00767838	23.5229	28.134
	rs4987360	G	A	G	A	0.3359	0.0307165	0.2763	FALSE	FALSE	FALSE	L0CN41	169695726	0.253799	0.0269167	outcome	TRUE	reported	textfile	4.36918e-29	1	169664867	3042	0.02969	TRUE	reported	igd	2	TRUE	0.0403776	127.913	28.134
	rs530377	C	T	C	T	0.1614	-0.0231065	0.2206	FALSE	FALSE	FALSE	L0CN41	132462234	0.381741	0.0264167	outcome	TRUE	reported	textfile	7.28199e-07	9	135337621	3042	0.03252	TRUE	reported	igd	2	TRUE	0.00803238	24.6162	28.134
	rs55859756	C	G	C	G	0.2127	-0.0326995	0.0866	FALSE	TRUE	TRUE	L0CN41	36743326	0.573457	0.0580842	outcome	TRUE	reported	textfile	8.93696e-06	22	37139371	3042	0.04782	TRUE	reported	igd	2	FALSE	0.00646162	19.7711	28.134
	rs62236339	A	T	A	T	0.228	0.0319033	0.0769	FALSE	TRUE	TRUE	L0CN41	16404578	0.542355	0.0523645	outcome	TRUE	reported	textfile	6.40295e-06	3	16446085	3042	0.05043	TRUE	reported	igd	2	FALSE	0.00667458	20.4271	28.134
	rs7139370	T	C	T	C	0.2947	-0.0521027	0.0676	FALSE	FALSE	FALSE	L0CN41	109323925	0.251644	0.0454503	outcome	TRUE	reported	textfile	4.96295e-08	13	109976273	3042	0.0539	TRUE	reported	igd	2	TRUE	0.00973143	29.8743	28.134
	rs7150584	T	C	T	C	-0.1787	0.0405554	0.1624	FALSE	FALSE	FALSE	L0CN41	57849637	0.154151	0.0284595	outcome	TRUE	reported	textfile	9.95497e-07	14	58316355	3042	0.03646	TRUE	reported	igd	2	TRUE	0.00783503	24.0066	28.134
	rs717824	T	C	T	C	-0.3108	-0.0326583	0.0396	FALSE	FALSE	FALSE	L0CN41	13992873	0.401033	0.0388893	outcome	TRUE	reported	textfile	7.45195e-06	7	14032498	3042	0.06924	TRUE	reported	igd	2	TRUE	0.00657994	20.1355	28.134
	rs76717104	T	C	T	C	0.4905	0.0136448	0.0155	FALSE	FALSE	FALSE	L0CN41	17604411	0.823841	0.0612951	outcome	TRUE	reported	textfile	7.02005e-06	7	17644035	3042	0.109	TRUE	reported	igd	2	TRUE	0.00661278	20.2367	28.134
	rs9807014	T	C	T	C	-0.2057	-0.050488	0.1333	FALSE	FALSE	FALSE	L0CN41	78112556	0.0865845	0.0294614	outcome	TRUE	reported	textfile	2.34498e-07	17	76108637	3042	0.0397	TRUE	reported	igd	2	TRUE	0.00874807	26.8288	28.134
	rs9824107	A	C	A	C	-0.1976	0.0350978	0.106	FALSE	FALSE	FALSE	L0CN41	174642659	0.271234	0.0319006	outcome	TRUE	reported	textfile	5.66304e-06	3	174360449	3042	0.04346	TRUE	reported	igd	2	TRUE	0.00674985	20.659	28.134
	rs9859349	A	G	A	G	0.227	0.0543167	0.1205	FALSE	FALSE	FALSE	L0CN41	31620262	0.112938	0.0342665	outcome	TRUE	reported	textfile	4.89204e-08	3	31661754	3042	0.04151	TRUE	reported	igd	2	TRUE	0.00973506	29.8855	28.134
GCST90001452	rs10891433	T	A	T	A	-0.1217	0.000430683	0.3378	FALSE	TRUE	TRUE	Rb6fon	112771486	0.987458	0.0273978	outcome	TRUE	reported	textfile	7.99392e-06	11	112642209	3017	0.02721	TRUE	reported	igd	2	FALSE	0.00658686	19.9911	22.0491
	rs11213272	G	A	G	A	0.3583	-0.0648427	0.027	FALSE	FALSE	FALSE	Rb6fon	110115563	0.539598	0.105707	outcome	TRUE	reported	textfile	8.13299e-06	11	109986288	3017	0.08017	TRUE	reported	igd	2	TRUE	0.00657701	19.961	22.0491
	rs113800324	T	C	T	C	0.3099	0.0517231	0.05	FALSE	FALSE	FALSE	Rb6fon	69372826	0.491925	0.0752609	outcome	TRUE	reported	textfile	1.68298e-07	12	69766606	3017	0.05911	TRUE	reported	igd	2	TRUE	0.00902832	27.4684	22.0491
	rs117545845	T	C	T	C	0.1774	-0.021629	0.121	FALSE	FALSE	FALSE	Rb6fon	25226918	0.584548	0.0395589	outcome	TRUE	reported	textfile	7.29693e-06	22	25622885	3017	0.03948	TRUE	reported	igd	2	TRUE	0.00664784	20.1774	22.0491
	rs11772116	C	G	C	G	0.225	-0.00745165	0.0766	FALSE	TRUE	TRUE	Rb6fon	23555303	0.84644	0.0384776	outcome	TRUE	reported	textfile	4.02402e-06	7	23594922	3017	0.04872	TRUE	reported	igd	2	FALSE	0.00701966	21.3139	22.0491
	rs12277397	T	G	T	G	0.1808	-0.0412278	0.1178	FALSE	FALSE	FALSE	Rb6fon	134699208	0.195712	0.0318641	outcome	TRUE	reported	textfile	5.15395e-06	11	134569102	3017	0.0396	TRUE	reported	igd	2	TRUE	0.00686184	20.8314	22.0491
	rs1268974	G	A	G	A	0.117	-0.0434055	0.5486	FALSE	FALSE	FALSE	Rb6fon	79092621	0.0812756	0.024898	outcome	TRUE	reported	textfile	5.50795e-06	10	80852378	3017	0.02571	TRUE	reported	igd	2	TRUE	0.00681744	20.6957	22.0491
	rs13104041	A	G	A	G	0.7057	0.0176	0.0073	FALSE	FALSE	FALSE	Rb6fon	172648298	0.730257	0.0510467	outcome	TRUE	reported	textfile	5.49604e-06	4	173569449	3017	0.155	TRUE	reported	igd	2	TRUE	0.00682382	20.7152	22.0491
	rs1407142	C	T	C	T	0.201	-0.0145039	0.9123	FALSE	FALSE	FALSE	Rb6fon	86475137	0.678469	0.0349869	outcome	TRUE	reported	textfile	9.81296e-06	1	86940820	3017	0.04538	TRUE	reported	igd	2	TRUE	0.0064606	19.6054	22.0491
	rs150248455	A	G	A	G	0.2439	-0.0332917	0.0673	FALSE	FALSE	FALSE	Rb6fon	44953256	0.845362	0.170692	outcome	TRUE	reported	textfile	2.273e-06	21	46373171	3017	0.05149	TRUE	reported	igd	2	TRUE	0.00738218	22.4228	22.0491
	rs17474599	T	C	T	C	-0.5233	0.0460628	0.0146	FALSE	FALSE	FALSE	Rb6fon	99941294	0.502545	0.0687001	outcome	TRUE	reported	textfile	1.76498e-06	13	100593548	3017	0.1093	TRUE	reported	igd	2	TRUE	0.00754047	22.9073	22.0491
	rs2404849	G	T	G	T	0.1532	0.104185	0.7463	FALSE	FALSE	FALSE	Rb6fon	224085090	0.0145794	0.0426521	outcome	TRUE	reported	textfile	3.597e-07	1	224272792	3017	0.03003	TRUE	reported	igd	2	TRUE	0.00855266	26.0087	22.0491
	rs34142458	G	A	G	A	-0.1581	0.0258667	0.8397	FALSE	FALSE	FALSE	Rb6fon	2889236	0.294629	0.0246815	outcome	TRUE	reported	textfile	6.42096e-06	17	2792530	3017	0.03498	TRUE	reported	igd	2	TRUE	0.0067254	20.4144	22.0491
	rs4359381	C	G	C	G	0.2509	0.0545241	0.06	FALSE	TRUE	TRUE	Rb6fon	61456328	0.195245	0.0420965	outcome	TRUE	reported	textfile	4.70002e-06	15	61748527	3017	0.0547	TRUE	reported	igd	2	FALSE	0.00692522	21.0251	22.0491
	rs4899265	C	A	C	A	0.1241	0.0201094	0.3474	FALSE	FALSE	FALSE	Rb6fon	68854844	0.43196	0.0255897	outcome	TRUE	reported	textfile	6.43902e-06	14	69321561	3017	0.02747	TRUE	reported	igd	2	TRUE	0.00671928	20.3957	22.0491
	rs55971447	T	C	T	C	-0.1809	-0.0378283	0.231	FALSE	FALSE	FALSE	Rb6fon	161545536	0.327071	0.0385991	outcome	TRUE	reported	textfile	4.94698e-09	1	161515326	3017	0.03084	TRUE	reported	igd	2	TRUE	0.0112758	34.3843	22.0491
	rs72660177	T	C	T	C	-0.2006	0.0257806	0.1018	FALSE	FALSE	FALSE	Rb6fon	33553763	0.580669	0.0466696	outcome	TRUE	reported	textfile	3.60903e-06	1	34019363	3017	0.04321	TRUE	reported	igd	2	TRUE	0.00709295	21.538	22.0491
	rs72724781	G	A	G	A	0.9448	0.0155648	0.0041	FALSE	FALSE	FALSE	Rb6fon	88861380	0.784945	0.0570387	outcome	TRUE	reported	textfile	2.46899e-06	1	89327063	3017	0.2002	TRUE	reported	igd	2	TRUE	0.00732794	22.2568	22.0491
	rs72835655	T	G	T	G	0.2484	0.00250731	0.0595	FALSE	FALSE	FALSE	Rb6fon	167922994	0.962463	0.0532759	outcome	TRUE	reported	textfile	9.1071e-06	5	167349999	3017	0.05589	TRUE	reported	igd	2	TRUE	0.00650467	19.74	22.0491
	rs75220521	G	T	G	T	-1.36	-0.0430035	0.002	FALSE	FALSE	FALSE	Rb6fon	80950413	0.548272	0.0716305	outcome	TRUE	reported	textfile	2.947e-06	6	81660130	3017	0.2904	TRUE	reported	igd	2	TRUE	0.00721711	21.9178	22.0491
	rs76524078	A	G	A	G	1.307	0.0302147	0.0023	FALSE	FALSE	FALSE	Rb6fon	26202763	0.6367	0.0639714	outcome	TRUE	reported	textfile	4.24004e-06	12	26355696	3017	0.2836	TRUE	reported	igd	2	TRUE	0.00699064	21.2251	22.0491
	rs77694582	A	G	A	G	-0.2264	0.0262353	0.0746	FALSE	FALSE	FALSE	Rb6fon	102429567	0.667815	0.0611335	outcome	TRUE	reported	textfile	7.66002e-06	14	102895904	3017	0.0505	TRUE	reported	igd	2	TRUE	0.00661776	20.0855	22.0491
GCST90001453	rs10804278	T	C	T	C	0.1244	-0.0364204	0.387	FALSE	FALSE	FALSE	JVULz3	219668327	0.123847	0.0236676	outcome	TRUE	reported	textfile	5.93595e-06	2	220533049	3040	0.02742	TRUE	reported	igd	2	TRUE	0.00672515	20.5693	22.2005
	rs10924239	A	G	A	G	0.207	-0.0323608	0.0993	FALSE	FALSE	FALSE	JVULz3	245558539	0.381723	0.0369953	outcome	TRUE	reported	textfile	3.51601e-06	1	245721841	3040	0.04455	TRUE	reported	igd	2	TRUE	0.00705177	21.5754	22.2005
	rs114693598	T	G	T	G	-0.195	-0.0682955	0.1418	FALSE	FALSE	FALSE	JVULz3	161530922	0.182641	0.0512472	outcome	TRUE	reported	textfile	4.68296e-07	1	161500712	3040	0.03862	TRUE	reported	igd	2	TRUE	0.00831657	25.4776	22.2005
	rs11610005	G	C	G	C	-0.1298	0.00183792	0.4359	FALSE	TRUE	TRUE	JVULz3	27813277	0.938519	0.0238286	outcome	TRUE	reported	textfile	2.053e-06	12	27966210	3040	0.02728	TRUE	reported	igd	2	FALSE	0.00739205	22.6243	22.2005
	rs116249234	A	G	A	G	0.245	-0.0603265	0.0661	FALSE	FALSE	FALSE	JVULz3	56428968	0.371454	0.0674979	outcome	TRUE	reported	textfile	9.3981e-06	1	56894640	3040	0.0552	TRUE	reported	igd	2	TRUE	0.00643836	19.6865	22.2005
	rs117909439	T	C	T	C	-0.6373	-0.161562	0.0089	FALSE	FALSE	FALSE	JVULz3	29449004	0.0617988	0.0865017	outcome	TRUE	reported	textfile	8.25392e-06	14	29918210	3040	0.1427	TRUE	reported	igd	2	TRUE	0.00651818	19.9321	22.2005
	rs11921245	C	T	C	T	0.1689	0.0207145	0.1456	FALSE	FALSE	FALSE	JVULz3	65590845	0.478692	0.0292409	outcome	TRUE	reported	textfile	7.32302e-06	3	65576520	3040	0.03761	TRUE	reported	igd	2	TRUE	0.00659033	20.1543	22.2005
	rs13241407	G	A	G	A	-0.2769	-0.0355197	0.0482	FALSE	FALSE	FALSE	JVULz3	153987735	0.592895	0.0664359	outcome	TRUE	reported	textfile	7.23003e-06	7	153684820	3040	0.0616	TRUE	reported	igd	2	TRUE	0.00660289	20.1929	22.2005
	rs138567833	A	G	A	G	-0.2161	0.140173	0.0895	FALSE	FALSE	FALSE	JVULz3	181862680	0.0876859	0.0820813	outcome	TRUE	reported	textfile	3.68697e-06	4	182783833	3040	0.0466	TRUE	reported	igd	2	TRUE	0.00702429	21.4908	22.2005
	rs1469503	T	A	T	A	0.2989	0.01758	0.9564	FALSE	TRUE	TRUE	JVULz3	112205970	0.839097	0.0865803	outcome	TRUE	reported	textfile	3.90796e-06	11	112076693	3040	0.06464	TRUE	reported	igd	2	FALSE	0.00698444	21.368	22.2005
	rs1800973	A	C	A	C	0.25	0.0356222	0.0831	FALSE	FALSE	FALSE	JVULz3	69350234	0.501493	0.052998	outcome	TRUE	reported	textfile	2.10999e-07	12	69744014	3040	0.04806	TRUE	reported	igd	2	TRUE	0.00882247	27.0412	22.2005
	rs191730825	G	A	G	A	0.3846	-1.23404	0.0293	FALSE	FALSE	FALSE	JVULz3	46147567	0.00867042	0.470149	outcome	TRUE	reported	textfile	2.30399e-06	1	46613239	3040	0.08124	TRUE	reported	igd	2	TRUE	0.00731838	22.3972	22.2005
	rs4468691	G	A	G	A	0.1484	0.0342441	0.7286	FALSE	FALSE	FALSE	JVULz3	46987312	0.175649	0.0252859	outcome	TRUE	reported	textfile	9.12998e-07	17	45064678	3040	0.03016	TRUE	reported	igd	2	TRUE	0.00790108	24.1946	22.2005
	rs4922033	T	C	T	C	0.1227	-0.025627	0.3901	FALSE	FALSE	FALSE	JVULz3	19468792	0.294049	0.0244234	outcome	TRUE	reported	textfile	7.18208e-06	8	19326303	3040	0.02728	TRUE	reported	igd	2	TRUE	0.00661068	20.2169	22.2005
	rs57566659	C	G	C	G	0.3077	-0.0167169	0.0462	FALSE	TRUE	TRUE	JVULz3	42579441	0.702865	0.043824	outcome	TRUE	reported	textfile	1.21599e-06	12	42973243	3040	0.06328	TRUE	reported	igd	2	FALSE	0.00771763	23.6285	22.2005
	rs62002392	G	A	G	A	0.1991	0.0142357	0.1118	FALSE	FALSE	FALSE	JVULz3	36908078	0.750829	0.04483	outcome	TRUE	reported	textfile	3.12097e-06	15	37200279	3040	0.04263	TRUE	reported	igd	2	TRUE	0.00712415	21.7985	22.2005
	rs73073066	T	C	T	C	0.4544	-0.0254828	0.0229	FALSE	FALSE	FALSE	JVULz3	23447351	0.611609	0.050185	outcome	TRUE	reported	textfile	3.42997e-07	7	23486970	3040	0.08893	TRUE	reported	igd	2	TRUE	0.00851515	26.0912	22.2005
	rs74610143	T	C	T	C	0.5956	-0.25175	0.0125	FALSE	FALSE	FALSE	JVULz3	173026751	0.086808	0.147009	outcome	TRUE	reported	textfile	2.52203e-06	3	172744541	3040	0.1263	TRUE	reported	igd	2	TRUE	0.00726212	22.2237	22.2005
	rs80087840	A	G	A	G	-0.6187	-0.076408	0.0105	FALSE	FALSE	FALSE	JVULz3	17640010	0.229929	0.0636445	outcome	TRUE	reported	textfile	4.36999e-06	1	17966505	3040	0.1345	TRUE	reported	igd	2	TRUE	0.00691241	21.1461	22.2005
GCST90001454	rs10759491	T	C	T	C	-0.1197	0.00766495	0.4032	FALSE	FALSE	FALSE	owxqLn	111090061	0.754524	0.0245137	outcome	TRUE	reported	textfile	8.75004e-06	9	113852341	3018	0.02688	TRUE	reported	igd	2	TRUE	0.00652779	19.8172	21.0238
	rs10887149	A	G	A	G	0.1276	-0.0255295	0.3101	FALSE	FALSE	FALSE	owxqLn	122407488	0.353066	0.0274907	outcome	TRUE	reported	textfile	8.36392e-06	10	124167004	3018	0.02858	TRUE	reported	igd	2	TRUE	0.00656143	19.92	21.0238
	rs10948829	G	A	G	A	-0.2094	0.0768186	0.0911	FALSE	FALSE	FALSE	owxqLn	54612130	0.221376	0.062818	outcome	TRUE	reported	textfile	6.346e-06	6	54476928	3018	0.0463	TRUE	reported	igd	2	TRUE	0.00673191	20.4411	21.0238
	rs10980077	A	G	A	G	-0.1284	0.0250498	0.3118	FALSE	FALSE	FALSE	owxqLn	109838024	0.306803	0.0245117	outcome	TRUE	reported	textfile	5.89794e-06	9	112600304	3018	0.0283	TRUE	reported	igd	2	TRUE	0.00677463	20.5717	21.0238
	rs111224423	G	C	G	C	-0.2927	0.0721139	0.0409	FALSE	TRUE	TRUE	owxqLn	1529435	0.159094	0.0512128	outcome	TRUE	reported	textfile	8.97697e-06	4	1531162	3018	0.06581	TRUE	reported	igd	2	FALSE	0.00651186	19.7685	21.0238
	rs115431394	C	A	C	A	0.5986	-0.0617283	0.0096	FALSE	FALSE	FALSE	owxqLn	1599670	0.434034	0.0789055	outcome	TRUE	reported	textfile	8.26704e-06	3	1641354	3018	0.134	TRUE	reported	igd	2	TRUE	0.00656875	19.9423	21.0238
	rs117545845	T	C	T	C	0.1995	-0.021629	0.1209	FALSE	FALSE	FALSE	owxqLn	25226918	0.584548	0.0395589	outcome	TRUE	reported	textfile	5.04696e-07	22	25622885	3018	0.03962	TRUE	reported	igd	2	TRUE	0.00833114	25.3378	21.0238
	rs1320172	T	C	T	C	0.1401	-0.0455676	0.2179	FALSE	FALSE	FALSE	owxqLn	61584079	0.0589644	0.0241295	outcome	TRUE	reported	textfile	9.92293e-06	3	61569753	3018	0.03165	TRUE	reported	igd	2	TRUE	0.00645058	19.5813	21.0238
	rs139554006	A	G	A	G	0.3934	-0.0149231	0.0255	FALSE	FALSE	FALSE	owxqLn	53364840	0.856441	0.0824908	outcome	TRUE	reported	textfile	2.16501e-06	14	53831558	3018	0.08287	TRUE	reported	igd	2	TRUE	0.0074118	22.5209	21.0238
	rs144348353	T	G	T	G	0.3569	-0.20279	0.0295	FALSE	FALSE	FALSE	owxqLn	87797807	0.137213	0.136444	outcome	TRUE	reported	textfile	6.31393e-06	15	88341038	3018	0.07891	TRUE	reported	igd	2	TRUE	0.00673249	20.4428	21.0238
	rs148420500	A	G	A	G	-0.4212	-0.0441411	0.0209	FALSE	FALSE	FALSE	owxqLn	75460036	0.603337	0.084951	outcome	TRUE	reported	textfile	2.86398e-06	13	76034172	3018	0.08981	TRUE	reported	igd	2	TRUE	0.00723526	21.9806	21.0238
	rs2240899	C	G	C	G	-0.1231	0.0136175	0.6678	FALSE	TRUE	TRUE	owxqLn	3595013	0.582589	0.0247768	outcome	TRUE	reported	textfile	8.88505e-06	18	3595011	3018	0.02767	TRUE	reported	igd	2	FALSE	0.00651538	19.7793	21.0238
	rs28680389	A	G	A	G	0.2396	-0.0627514	0.0747	FALSE	FALSE	FALSE	owxqLn	134696381	0.0688351	0.0344883	outcome	TRUE	reported	textfile	1.47299e-06	11	134566275	3018	0.04966	TRUE	reported	igd	2	TRUE	0.00765427	23.2634	21.0238
	rs3797612	C	T	C	T	0.1137	-0.0275852	0.4606	FALSE	FALSE	FALSE	owxqLn	179204698	0.24332	0.0236432	outcome	TRUE	reported	textfile	9.52906e-06	5	178631699	3018	0.02564	TRUE	reported	igd	2	TRUE	0.00647359	19.6516	21.0238
	rs4899265	C	A	C	A	0.1267	0.0201094	0.3474	FALSE	FALSE	FALSE	owxqLn	68854844	0.43196	0.0255897	outcome	TRUE	reported	textfile	4.52699e-06	14	69321561	3018	0.02759	TRUE	reported	igd	2	TRUE	0.00693915	21.0747	21.0238
	rs7190107	A	T	A	T	-0.1416	-0.0215097	0.2169	FALSE	TRUE	TRUE	owxqLn	50239384	0.613857	0.0426292	outcome	TRUE	reported	textfile	7.05992e-06	16	50273295	3018	0.03148	TRUE	reported	igd	2	FALSE	0.00665941	20.2194	21.0238
	rs7437802	T	C	T	C	-0.1209	-0.0225632	0.6269	FALSE	FALSE	FALSE	owxqLn	147259745	0.343518	0.02382	outcome	TRUE	reported	textfile	8.65307e-06	4	148180897	3018	0.02713	TRUE	reported	igd	2	TRUE	0.0065371	19.8456	21.0238
	rs74805957	T	C	T	C	0.3042	0.145873	0.0396	FALSE	FALSE	FALSE	owxqLn	112183696	0.255824	0.128374	outcome	TRUE	reported	textfile	5.90704e-06	2	112941273	3018	0.06703	TRUE	reported	igd	2	TRUE	0.00677809	20.5822	21.0238
	rs938447	C	T	C	T	0.1364	-0.0207394	0.6473	FALSE	FALSE	FALSE	owxqLn	108352650	0.422	0.0258288	outcome	TRUE	reported	textfile	6.93905e-07	12	108746427	3018	0.02743	TRUE	reported	igd	2	TRUE	0.0081267	24.7109	21.0238
GCST90001455	rs111224423	G	C	G	C	-0.2995	0.0721139	0.0406	FALSE	TRUE	TRUE	HhQMzP	1529435	0.159094	0.0512128	outcome	TRUE	reported	textfile	8.14798e-06	4	1531162	3041	0.06702	TRUE	reported	igd	2	FALSE	0.00652418	19.9572	21.6254
	rs11766800	T	A	T	A	-0.1541	-0.0116	0.1981	FALSE	TRUE	TRUE	HhQMzP	50367919	0.623494	0.0236298	outcome	TRUE	reported	textfile	5.28896e-06	7	50435617	3041	0.03378	TRUE	reported	igd	2	FALSE	0.00679685	20.797	21.6254
	rs12485444	A	T	A	T	0.1287	-0.00350062	0.4742	FALSE	TRUE	TRUE	HhQMzP	188417995	0.882952	0.0237769	outcome	TRUE	reported	textfile	1.67302e-06	3	188135783	3041	0.02682	TRUE	reported	igd	2	FALSE	0.00751531	23.012	21.6254
	rs151240896	G	A	G	A	-0.2473	0.0242053	0.0702	FALSE	FALSE	FALSE	HhQMzP	9187079	0.711839	0.0655284	outcome	TRUE	reported	textfile	1.42699e-06	3	9228763	3041	0.0512	TRUE	reported	igd	2	TRUE	0.0076133	23.3143	21.6254
	rs2955643	A	G	A	G	0.1248	-0.0417551	0.4513	FALSE	FALSE	FALSE	HhQMzP	9344410	0.0938188	0.0249196	outcome	TRUE	reported	textfile	2.23501e-06	3	9386094	3041	0.02633	TRUE	reported	igd	2	TRUE	0.00733355	22.4513	21.6254
	rs35079623	C	T	C	T	0.3488	0.0609393	0.0344	FALSE	FALSE	FALSE	HhQMzP	31399152	0.577539	0.109409	outcome	TRUE	reported	textfile	2.80899e-06	14	31868358	3041	0.07433	TRUE	reported	igd	2	TRUE	0.0071891	22.0059	21.6254
	rs356651	T	C	T	C	-0.176	0.0581087	0.8576	FALSE	FALSE	FALSE	HhQMzP	100925336	0.127538	0.038132	outcome	TRUE	reported	textfile	5.87801e-06	2	101541798	3041	0.03878	TRUE	reported	igd	2	TRUE	0.00672762	20.5837	21.6254
	rs4668750	A	G	A	G	0.2764	-0.082957	0.0524	FALSE	FALSE	FALSE	HhQMzP	12211741	0.0131326	0.0334484	outcome	TRUE	reported	textfile	2.63299e-06	2	12351867	3041	0.05873	TRUE	reported	igd	2	TRUE	0.00723083	22.1345	21.6254
	rs5761319	T	A	T	A	0.1333	0.0204517	0.479	FALSE	TRUE	TRUE	HhQMzP	25926986	0.443456	0.0266864	outcome	TRUE	reported	textfile	6.65503e-07	22	26322953	3041	0.02676	TRUE	reported	igd	2	FALSE	0.00809361	24.7972	21.6254
	rs6430066	C	T	C	T	0.1271	-0.00502404	0.329	FALSE	FALSE	FALSE	HhQMzP	144747220	0.83591	0.0242557	outcome	TRUE	reported	textfile	9.97493e-06	2	145504787	3041	0.02872	TRUE	reported	igd	2	TRUE	0.00639908	19.5721	21.6254
	rs76234991	T	A	T	A	0.4559	-0.0311231	0.0178	FALSE	TRUE	TRUE	HhQMzP	88655178	0.65249	0.0691157	outcome	TRUE	reported	textfile	9.40005e-06	1	89120861	3041	0.1027	TRUE	reported	igd	2	FALSE	0.00643838	19.693	21.6254
	rs765044	G	T	G	T	0.1523	0.0397439	0.2292	FALSE	FALSE	FALSE	HhQMzP	2560425	0.106685	0.0246355	outcome	TRUE	reported	textfile	1.40101e-06	19	2560423	3041	0.03151	TRUE	reported	igd	2	TRUE	0.00762365	23.3463	21.6254
	rs78736203	A	G	A	G	-0.2955	-0.0359773	0.0449	FALSE	FALSE	FALSE	HhQMzP	18134043	0.702925	0.0943357	outcome	TRUE	reported	textfile	6.48694e-06	10	18422972	3041	0.06541	TRUE	reported	igd	2	TRUE	0.00666661	20.3958	21.6254
	rs9919190	G	C	G	C	-0.1352	0.0236823	0.271	FALSE	TRUE	TRUE	HhQMzP	165707547	0.362716	0.0260187	outcome	TRUE	reported	textfile	5.52993e-06	1	165676784	3041	0.02971	TRUE	reported	igd	2	FALSE	0.0067637	20.6949	21.6254
GCST90001456	rs112353331	T	C	T	C	-0.4377	0.0485652	0.0197	FALSE	FALSE	FALSE	yYSDKJ	99942567	0.481296	0.0689631	outcome	TRUE	reported	textfile	7.07995e-06	13	100594821	3019	0.09729	TRUE	reported	igd	2	TRUE	0.00665965	20.2269	21.6235
	rs116484930	T	C	T	C	1.839	-0.125312	0.0012	FALSE	FALSE	FALSE	yYSDKJ	76519456	0.418141	0.154773	outcome	TRUE	reported	textfile	5.22601e-06	1	76985141	3019	0.4029	TRUE	reported	igd	2	TRUE	0.00685361	20.82	21.6235
	rs117545845	T	C	T	C	0.189	-0.021629	0.1211	FALSE	FALSE	FALSE	yYSDKJ	25226918	0.584548	0.0395589	outcome	TRUE	reported	textfile	2.678e-06	22	25622885	3019	0.04018	TRUE	reported	igd	2	TRUE	0.00727561	22.1114	21.6235
	rs12277397	T	G	T	G	0.1863	-0.0412278	0.1179	FALSE	FALSE	FALSE	yYSDKJ	134699208	0.195712	0.0318641	outcome	TRUE	reported	textfile	4e-06	11	134569102	3019	0.04033	TRUE	reported	igd	2	TRUE	0.00701855	21.3246	21.6235
	rs148420500	A	G	A	G	-0.4097	-0.0441411	0.0209	FALSE	FALSE	FALSE	yYSDKJ	75460036	0.603337	0.084951	outcome	TRUE	reported	textfile	6.96996e-06	13	76034172	3019	0.091	TRUE	reported	igd	2	TRUE	0.00666929	20.2564	21.6235
	rs151194174	A	G	A	G	-0.3754	0.0866966	0.0305	FALSE	FALSE	FALSE	yYSDKJ	20956159	0.163054	0.0621538	outcome	TRUE	reported	textfile	1.91898e-06	7	20995778	3019	0.07868	TRUE	reported	igd	2	TRUE	0.00748401	22.7495	21.6235
	rs2295270	A	G	A	G	0.1631	-0.0126093	0.19	FALSE	FALSE	FALSE	yYSDKJ	47248826	0.838258	0.0617734	outcome	TRUE	reported	textfile	1.91898e-06	6	47216562	3019	0.03419	TRUE	reported	igd	2	TRUE	0.00748144	22.7416	21.6235
	rs2404849	G	T	G	T	0.1466	0.104185	0.7464	FALSE	FALSE	FALSE	yYSDKJ	224085090	0.0145794	0.0426521	outcome	TRUE	reported	textfile	1.79602e-06	1	224272792	3019	0.03065	TRUE	reported	igd	2	TRUE	0.00752082	22.8623	21.6235
	rs2587473	T	C	T	C	-0.1584	-0.0331852	0.2433	FALSE	FALSE	FALSE	yYSDKJ	70756029	0.182448	0.0248904	outcome	TRUE	reported	textfile	4.46601e-07	10	72515785	3019	0.03131	TRUE	reported	igd	2	TRUE	0.00840649	25.5774	21.6235
	rs506388	G	T	G	T	0.1258	-0.0400157	0.632	FALSE	FALSE	FALSE	yYSDKJ	229435314	0.0895612	0.0235704	outcome	TRUE	reported	textfile	7.66408e-06	1	229571061	3019	0.02806	TRUE	reported	igd	2	TRUE	0.00661365	20.0862	21.6235
	rs55651060	T	G	T	G	-0.5072	-0.0203224	0.0157	FALSE	FALSE	FALSE	yYSDKJ	66582855	0.78675	0.0751198	outcome	TRUE	reported	textfile	1.71498e-06	6	67292748	3019	0.1058	TRUE	reported	igd	2	TRUE	0.00755493	22.9667	21.6235
	rs56186608	T	C	T	C	-0.1271	-0.0221139	0.3741	FALSE	FALSE	FALSE	yYSDKJ	44590452	0.404625	0.0265349	outcome	TRUE	reported	textfile	5.88803e-06	1	45056124	3019	0.02801	TRUE	reported	igd	2	TRUE	0.00677407	20.5768	21.6235
	rs561934182	G	C	G	C	1.163	-0.123381	0.0035	FALSE	TRUE	TRUE	yYSDKJ	103166270	0.266753	0.111097	outcome	TRUE	reported	textfile	3.61302e-06	1	103631826	3019	0.2505	TRUE	reported	igd	2	FALSE	0.0070891	21.5405	21.6235
	rs6808893	T	C	T	C	-0.1285	-0.00867164	0.5711	FALSE	FALSE	FALSE	yYSDKJ	188415651	0.715571	0.0237981	outcome	TRUE	reported	textfile	2.31201e-06	3	188133439	3019	0.02714	TRUE	reported	igd	2	TRUE	0.00737073	22.4026	21.6235
	rs72660177	T	C	T	C	-0.198	0.0257806	0.1017	FALSE	FALSE	FALSE	yYSDKJ	33553763	0.580669	0.0466696	outcome	TRUE	reported	textfile	7.13806e-06	1	34019363	3019	0.04402	TRUE	reported	igd	2	TRUE	0.00665682	20.2182	21.6235
	rs74610143	T	C	T	C	0.5811	-0.25175	0.0124	FALSE	FALSE	FALSE	yYSDKJ	173026751	0.086808	0.147009	outcome	TRUE	reported	textfile	3.83902e-06	3	172744541	3019	0.1256	TRUE	reported	igd	2	TRUE	0.0070403	21.3912	21.6235
	rs76376209	T	C	T	C	-0.1651	0.0250144	0.1423	FALSE	FALSE	FALSE	yYSDKJ	36857786	0.563938	0.0433522	outcome	TRUE	reported	textfile	9.12809e-06	17	35215045	3019	0.03714	TRUE	reported	igd	2	TRUE	0.006503	19.748	21.6235
GCST90001457	rs11785252	A	C	A	C	-0.1459	-0.00570819	0.7429	FALSE	FALSE	FALSE	RAcTbX	116388042	0.813617	0.0242116	outcome	TRUE	reported	textfile	2.32097e-06	8	117400280	3042	0.03084	TRUE	reported	igd	2	TRUE	0.00730364	22.3664	22.4405
	rs117853201	A	G	A	G	0.6992	0.0449688	0.0074	FALSE	FALSE	FALSE	RAcTbX	80324584	0.742214	0.136716	outcome	TRUE	reported	textfile	6.47307e-06	11	80035628	3042	0.1547	TRUE	reported	igd	2	TRUE	0.00667047	20.4144	22.4405
	rs143643742	G	A	G	A	-0.4681	-0.192689	0.0168	FALSE	FALSE	FALSE	RAcTbX	47346948	0.0905983	0.113866	outcome	TRUE	reported	textfile	7.46105e-06	20	45975692	3042	0.1043	TRUE	reported	igd	2	TRUE	0.00657784	20.129	22.4405
	rs1469503	T	A	T	A	0.304	0.01758	0.9564	FALSE	TRUE	TRUE	RAcTbX	112205970	0.839097	0.0865803	outcome	TRUE	reported	textfile	2.80498e-06	11	112076693	3042	0.06476	TRUE	reported	igd	2	FALSE	0.00719183	22.0215	22.4405
	rs191730825	G	A	G	A	0.3732	-1.23404	0.0293	FALSE	FALSE	FALSE	RAcTbX	46147567	0.00867042	0.470149	outcome	TRUE	reported	textfile	4.74799e-06	1	46613239	3042	0.08142	TRUE	reported	igd	2	TRUE	0.00685919	20.9959	22.4405
	rs2587473	T	C	T	C	-0.1412	-0.0331852	0.2431	FALSE	FALSE	FALSE	RAcTbX	70756029	0.182448	0.0248904	outcome	TRUE	reported	textfile	8.46798e-06	10	72515785	3042	0.03166	TRUE	reported	igd	2	TRUE	0.00649618	19.8775	22.4405
	rs35237330	A	G	A	G	-0.2309	0.0153256	0.0971	FALSE	FALSE	FALSE	RAcTbX	181847590	0.778978	0.0546075	outcome	TRUE	reported	textfile	3.82402e-07	4	182768743	3042	0.04538	TRUE	reported	igd	2	TRUE	0.00843877	25.8722	22.4405
	rs6038180	C	T	C	T	0.1304	0.00786774	0.2936	FALSE	FALSE	FALSE	RAcTbX	5484803	0.823724	0.0353196	outcome	TRUE	reported	textfile	7.41293e-06	20	5465449	3042	0.02905	TRUE	reported	igd	2	TRUE	0.00658016	20.1362	22.4405
	rs6808893	T	C	T	C	-0.1582	-0.00867164	0.5717	FALSE	FALSE	FALSE	RAcTbX	188415651	0.715571	0.0237981	outcome	TRUE	reported	textfile	8.47208e-09	3	188133439	3042	0.02739	TRUE	reported	igd	2	TRUE	0.0108476	33.3383	22.4405
	rs6942832	T	A	T	A	0.1238	-0.0193482	0.4196	FALSE	TRUE	TRUE	RAcTbX	24426269	0.417582	0.0238683	outcome	TRUE	reported	textfile	5.39498e-06	7	24465888	3042	0.02716	TRUE	reported	igd	2	FALSE	0.0067837	20.7633	22.4405
	rs7101558	G	A	G	A	-0.3015	-0.0300977	0.044	FALSE	FALSE	FALSE	RAcTbX	115516731	0.593956	0.0564565	outcome	TRUE	reported	textfile	3.21299e-06	11	115387449	3042	0.06462	TRUE	reported	igd	2	TRUE	0.00710534	21.7548	22.4405
	rs74610143	T	C	T	C	0.6697	-0.25175	0.0125	FALSE	FALSE	FALSE	RAcTbX	173026751	0.086808	0.147009	outcome	TRUE	reported	textfile	1.26101e-07	3	172744541	3042	0.1264	TRUE	reported	igd	2	TRUE	0.00914362	28.0531	22.4405
	rs76376209	T	C	T	C	-0.1798	0.0250144	0.1418	FALSE	FALSE	FALSE	RAcTbX	36857786	0.563938	0.0433522	outcome	TRUE	reported	textfile	1.749e-06	17	35215045	3042	0.03753	TRUE	reported	igd	2	TRUE	0.00748856	22.937	22.4405
	rs76838015	A	G	A	G	3.194	0.099842	0.0003	FALSE	FALSE	FALSE	RAcTbX	141025658	0.259165	0.0884837	outcome	TRUE	reported	textfile	8.7579e-06	4	141946812	3042	0.7173	TRUE	reported	igd	2	TRUE	0.00647571	19.8145	22.4405
	rs76968110	A	G	A	G	-0.447	0.0511202	0.0189	FALSE	FALSE	FALSE	RAcTbX	30691617	0.684435	0.125782	outcome	TRUE	reported	textfile	3.95303e-06	14	31160823	3042	0.0967	TRUE	reported	igd	2	TRUE	0.0069753	21.3539	22.4405
	rs77361483	T	C	T	C	0.2544	-0.0641085	0.0661	FALSE	FALSE	FALSE	RAcTbX	56426526	0.338954	0.0670428	outcome	TRUE	reported	textfile	4.45502e-06	1	56892198	3042	0.05533	TRUE	reported	igd	2	TRUE	0.00690154	21.1265	22.4405
	rs78175301	G	A	G	A	0.4043	-0.00459146	0.0251	FALSE	FALSE	FALSE	RAcTbX	23589434	0.926345	0.0496674	outcome	TRUE	reported	textfile	3.78504e-06	7	23629053	3042	0.0873	TRUE	reported	igd	2	TRUE	0.00700114	21.4335	22.4405
	rs9897015	A	G	A	G	-0.1267	-0.0110565	0.3922	FALSE	FALSE	FALSE	RAcTbX	47125392	0.642735	0.023835	outcome	TRUE	reported	textfile	3.58798e-06	17	45202758	3042	0.02729	TRUE	reported	igd	2	TRUE	0.00703591	21.5407	22.4405
GCST90001458	rs10746769	C	T	C	T	-0.1438	0.0104869	0.8078	FALSE	FALSE	FALSE	Wer2w6	85759839	0.666145	0.0243065	outcome	TRUE	reported	textfile	8.21391e-06	9	88374754	3387	0.03219	TRUE	reported	igd	2	TRUE	0.00585746	19.9443	44.8775
	rs10763776	A	T	A	T	-0.1158	-0.0168019	0.428	FALSE	TRUE	TRUE	Wer2w6	30124488	0.5466	0.0278702	outcome	TRUE	reported	textfile	7.76104e-06	10	30413417	3387	0.02585	TRUE	reported	igd	2	FALSE	0.00589	20.0558	44.8775
	rs115389169	T	C	T	C	-0.5608	0.0528838	0.0118	FALSE	FALSE	FALSE	Wer2w6	1939511	0.571201	0.0933874	outcome	TRUE	reported	textfile	6.54305e-06	3	1981195	3387	0.1242	TRUE	reported	igd	2	TRUE	0.00598344	20.3759	44.8775
	rs115805162	T	C	T	C	-0.2265	-0.0297467	0.2083	FALSE	FALSE	FALSE	Wer2w6	161440463	0.509996	0.0451499	outcome	TRUE	reported	textfile	2.75296e-12	1	161410253	3387	0.03229	TRUE	reported	igd	2	TRUE	0.0143193	49.1749	44.8775
	rs138949944	T	C	T	C	-1.325	-0.0136436	0.0018	FALSE	FALSE	FALSE	Wer2w6	21870165	0.897587	0.106002	outcome	TRUE	reported	textfile	5.28701e-06	9	21870164	3387	0.2906	TRUE	reported	igd	2	TRUE	0.00610053	20.7771	44.8775
	rs141320646	A	G	A	G	0.8749	-0.0087613	0.005	FALSE	FALSE	FALSE	Wer2w6	73157275	0.961755	0.182713	outcome	TRUE	reported	textfile	2.14501e-06	1	73622958	3387	0.1843	TRUE	reported	igd	2	TRUE	0.00660954	22.5221	44.8775
	rs142472859	C	T	C	T	0.7935	-0.0469407	0.0061	FALSE	FALSE	FALSE	Wer2w6	39799170	0.426576	0.0590401	outcome	TRUE	reported	textfile	1.25401e-06	2	40026310	3387	0.1634	TRUE	reported	igd	2	TRUE	0.00691451	23.5686	44.8775
	rs147431504	G	C	G	C	0.9423	0.377742	0.0038	FALSE	TRUE	TRUE	Wer2w6	2489627	0.455762	0.506463	outcome	TRUE	reported	textfile	3.642e-06	20	2470273	3387	0.2032	TRUE	reported	igd	2	FALSE	0.0063091	21.4919	44.8775
	rs147678401	A	G	A	G	0.319	-0.0339061	0.0437	FALSE	FALSE	FALSE	Wer2w6	161065990	0.535693	0.0547458	outcome	TRUE	reported	textfile	3.69199e-07	1	161035780	3387	0.06262	TRUE	reported	igd	2	TRUE	0.0076037	25.9357	44.8775
	rs147711004	A	G	A	G	-1.922	-0.110632	0.0009	FALSE	FALSE	FALSE	Wer2w6	44834661	0.0672202	0.0604481	outcome	TRUE	reported	textfile	7.94493e-06	19	45337918	3387	0.4296	TRUE	reported	igd	2	TRUE	0.00587495	20.0042	44.8775
	rs1664690	T	A	T	A	0.1978	-0.0624779	0.9117	FALSE	TRUE	TRUE	Wer2w6	4079924	0.0928881	0.0371813	outcome	TRUE	reported	textfile	9.85099e-06	19	4079922	3387	0.04469	TRUE	reported	igd	2	FALSE	0.00575058	19.5783	44.8775
	rs16938204	T	C	T	C	0.1297	0.0241394	0.2938	FALSE	FALSE	FALSE	Wer2w6	72436391	0.360777	0.026414	outcome	TRUE	reported	textfile	2.60898e-06	8	73348626	3387	0.02755	TRUE	reported	igd	2	TRUE	0.00650113	22.1503	44.8775
	rs17017403	C	T	C	T	-0.2007	-0.0509233	0.0977	FALSE	FALSE	FALSE	Wer2w6	111677906	0.16092	0.0363223	outcome	TRUE	reported	textfile	3.18002e-06	2	112435483	3387	0.04301	TRUE	reported	igd	2	TRUE	0.00638789	21.762	44.8775
	rs17036497	T	C	T	C	-0.4793	-0.0739552	0.0136	FALSE	FALSE	FALSE	Wer2w6	106006199	0.299858	0.0713344	outcome	TRUE	reported	textfile	6.98393e-06	4	106927356	3387	0.1065	TRUE	reported	igd	2	TRUE	0.00594444	20.2423	44.8775
	rs17711429	G	A	G	A	0.3915	0.0400575	0.0214	FALSE	FALSE	FALSE	Wer2w6	34844583	0.786499	0.147891	outcome	TRUE	reported	textfile	9.54707e-06	11	34866130	3387	0.08829	TRUE	reported	igd	2	TRUE	0.0057718	19.651	44.8775
	rs206131	T	C	T	C	-0.1238	-0.0235148	0.3106	FALSE	FALSE	FALSE	Wer2w6	32301626	0.453704	0.0313843	outcome	TRUE	reported	textfile	7.34294e-06	13	32875763	3387	0.02757	TRUE	reported	igd	2	TRUE	0.005918	20.1517	44.8775
	rs4681269	G	A	G	A	-0.1157	0.0155522	0.4244	FALSE	FALSE	FALSE	Wer2w6	145812780	0.595016	0.0292564	outcome	TRUE	reported	textfile	7.97003e-06	3	145530567	3387	0.02587	TRUE	reported	igd	2	TRUE	0.00587086	19.9902	44.8775
	rs569911	C	T	C	T	0.1529	-0.0638485	0.4349	FALSE	FALSE	FALSE	Wer2w6	160828419	0.00659903	0.0235046	outcome	TRUE	reported	textfile	5.432e-09	1	160798209	3387	0.02614	TRUE	reported	igd	2	TRUE	0.0100005	34.1938	44.8775
	rs6048352	G	A	G	A	-0.1264	0.0286818	0.6811	FALSE	FALSE	FALSE	Wer2w6	22799716	0.254341	0.0251623	outcome	TRUE	reported	textfile	3.16701e-06	20	22780354	3387	0.02708	TRUE	reported	igd	2	TRUE	0.00639141	21.7741	44.8775
	rs62504404	A	G	A	G	0.1205	-0.0385848	0.4846	FALSE	FALSE	FALSE	Wer2w6	38948550	0.111729	0.02426	outcome	TRUE	reported	textfile	1.81301e-06	8	38806068	3387	0.0252	TRUE	reported	igd	2	TRUE	0.00670557	22.8516	44.8775
	rs71632979	G	A	G	A	0.6546	-0.0404557	0.2449	FALSE	FALSE	FALSE	Wer2w6	161556607	0.290303	0.0382575	outcome	TRUE	reported	textfile	2.29087e-112	1	161526397	3387	0.02797	TRUE	reported	igd	2	TRUE	0.139204	547.407	44.8775
	rs72794768	A	C	A	C	0.5531	0.0392477	0.012	FALSE	FALSE	FALSE	Wer2w6	40245810	0.773407	0.136314	outcome	TRUE	reported	textfile	2.27002e-06	2	40472950	3387	0.1168	TRUE	reported	igd	2	TRUE	0.00657719	22.4112	44.8775
	rs76168011	G	C	G	C	-0.8214	-0.154322	0.0049	FALSE	TRUE	TRUE	Wer2w6	4332913	0.143579	0.105513	outcome	TRUE	reported	textfile	6.25101e-06	7	4372544	3387	0.1815	TRUE	reported	igd	2	FALSE	0.00601067	20.4691	44.8775
	rs79275634	A	G	A	G	0.574	0.00807009	0.0106	FALSE	FALSE	FALSE	Wer2w6	113208261	0.892667	0.0598094	outcome	TRUE	reported	textfile	5.90704e-06	5	112543958	3387	0.1265	TRUE	reported	igd	2	TRUE	0.00604221	20.5772	44.8775
GCST90001459	rs10735429	G	A	G	A	-0.1364	-0.0198167	0.7411	FALSE	FALSE	FALSE	UpSkaC	108332900	0.452796	0.0263955	outcome	TRUE	reported	textfile	5.313e-06	12	108726677	3410	0.02991	TRUE	reported	igd	2	TRUE	0.00606179	20.7846	39.4016
	rs114586806	T	C	T	C	0.3577	-0.0936624	0.0292	FALSE	FALSE	FALSE	UpSkaC	36355837	0.50113	0.139231	outcome	TRUE	reported	textfile	2.93299e-06	6	36323614	3410	0.07639	TRUE	reported	igd	2	TRUE	0.00638891	21.9134	39.4016
	rs11715127	C	G	C	G	-0.1682	-0.0239945	0.1276	FALSE	TRUE	TRUE	UpSkaC	342486	0.633108	0.0502655	outcome	TRUE	reported	textfile	4.99505e-06	3	384169	3410	0.03678	TRUE	reported	igd	2	FALSE	0.00609563	20.9013	39.4016
	rs12628370	T	C	T	C	-0.1675	-0.0207799	0.1474	FALSE	FALSE	FALSE	UpSkaC	27269181	0.47766	0.0292646	outcome	TRUE	reported	textfile	3.34996e-06	22	27665142	3410	0.03597	TRUE	reported	igd	2	TRUE	0.0063189	21.6717	39.4016
	rs1330145	G	T	G	T	0.1193	-0.0176416	0.5802	FALSE	FALSE	FALSE	UpSkaC	107705301	0.456141	0.0236732	outcome	TRUE	reported	textfile	4.35101e-06	9	110467582	3410	0.02592	TRUE	reported	igd	2	TRUE	0.006174	21.1717	39.4016
	rs141267173	T	C	T	C	-0.2542	-0.0913427	0.0531	FALSE	FALSE	FALSE	UpSkaC	210187269	0.220182	0.0745019	outcome	TRUE	reported	textfile	5.89902e-06	2	211051993	3410	0.05602	TRUE	reported	igd	2	TRUE	0.006002	20.5783	39.4016
	rs142472859	C	T	C	T	0.7369	-0.0469407	0.006	FALSE	FALSE	FALSE	UpSkaC	39799170	0.426576	0.0590401	outcome	TRUE	reported	textfile	8.07402e-06	2	40026310	3410	0.1648	TRUE	reported	igd	2	TRUE	0.0058292	19.9824	39.4016
	rs143140559	T	C	T	C	0.6438	-0.193998	0.0094	FALSE	FALSE	FALSE	UpSkaC	161002465	0.368863	0.215887	outcome	TRUE	reported	textfile	5.78496e-07	1	160972255	3410	0.1286	TRUE	reported	igd	2	TRUE	0.00729601	25.0475	39.4016
	rs1571857	T	C	T	C	-0.2037	0.0799267	0.0855	FALSE	FALSE	FALSE	UpSkaC	132419958	0.0299468	0.0368191	outcome	TRUE	reported	textfile	8.53002e-06	9	135295345	3410	0.04568	TRUE	reported	igd	2	TRUE	0.00579763	19.8735	39.4016
	rs17767335	C	T	C	T	1.198	-0.013943	0.0023	FALSE	FALSE	FALSE	UpSkaC	70835081	0.94483	0.201489	outcome	TRUE	reported	textfile	5.08698e-06	8	71747316	3410	0.2622	TRUE	reported	igd	2	TRUE	0.00608476	20.8638	39.4016
	rs196051	G	A	G	A	0.1185	0.0111381	0.3971	FALSE	FALSE	FALSE	UpSkaC	22055902	0.644172	0.024115	outcome	TRUE	reported	textfile	9.16495e-06	6	22056131	3410	0.02668	TRUE	reported	igd	2	TRUE	0.00575182	19.7156	39.4016
	rs34547718	G	T	G	T	-0.1378	-0.000984428	0.2875	FALSE	FALSE	FALSE	UpSkaC	129635739	0.969934	0.0261184	outcome	TRUE	reported	textfile	9.67297e-07	8	130647985	3410	0.02808	TRUE	reported	igd	2	TRUE	0.00701283	24.0685	39.4016
	rs4752481	T	G	T	G	0.1266	-0.0133181	0.4535	FALSE	FALSE	FALSE	UpSkaC	120941016	0.571858	0.0235587	outcome	TRUE	reported	textfile	1.034e-06	10	122700529	3410	0.02587	TRUE	reported	igd	2	TRUE	0.00697398	23.9342	39.4016
	rs4921823	T	C	T	C	-0.3324	0.164828	0.0362	FALSE	FALSE	FALSE	UpSkaC	17953474	0.166037	0.119005	outcome	TRUE	reported	textfile	2.39398e-06	8	17810983	3410	0.07035	TRUE	reported	igd	2	TRUE	0.00650437	22.312	39.4016
	rs6079813	A	G	A	G	-0.5066	-0.118691	0.0136	FALSE	FALSE	FALSE	UpSkaC	15426448	0.0286233	0.0542304	outcome	TRUE	reported	textfile	4.43803e-06	20	15407093	3410	0.1102	TRUE	reported	igd	2	TRUE	0.00615927	21.1209	39.4016
	rs62272723	T	G	T	G	0.2972	-0.0191027	0.0501	FALSE	FALSE	FALSE	UpSkaC	152245371	0.7683	0.0648431	outcome	TRUE	reported	textfile	7.26708e-07	3	151963160	3410	0.05987	TRUE	reported	igd	2	TRUE	0.0071746	24.6277	39.4016
	rs66730637	T	C	T	C	-0.2154	-0.0393763	0.0839	FALSE	FALSE	FALSE	UpSkaC	64966578	0.307135	0.0385568	outcome	TRUE	reported	textfile	3.478e-06	2	65193712	3410	0.04634	TRUE	reported	igd	2	TRUE	0.00629625	21.5936	39.4016
	rs71632979	G	A	G	A	0.6258	-0.0404557	0.2447	FALSE	FALSE	FALSE	UpSkaC	161556607	0.290303	0.0382575	outcome	TRUE	reported	textfile	8.46058e-99	1	161526397	3410	0.0287	TRUE	reported	igd	2	TRUE	0.122367	475.174	39.4016
	rs71639910	A	G	A	G	0.2526	0.0117126	0.0688	FALSE	FALSE	FALSE	UpSkaC	161967984	0.86793	0.0704357	outcome	TRUE	reported	textfile	9.21998e-07	1	161937774	3410	0.05138	TRUE	reported	igd	2	TRUE	0.00703812	24.1559	39.4016
	rs73064521	T	A	T	A	-0.2695	-0.00707748	0.0466	FALSE	TRUE	TRUE	UpSkaC	57636722	0.965446	0.163374	outcome	TRUE	reported	textfile	6.58097e-06	19	58148090	3410	0.05971	TRUE	reported	igd	2	FALSE	0.00593857	20.3596	39.4016
	rs73180904	T	C	T	C	0.2116	-0.0185756	0.0842	FALSE	FALSE	FALSE	UpSkaC	44191186	0.764281	0.0619467	outcome	TRUE	reported	textfile	6.223e-06	13	44765322	3410	0.04675	TRUE	reported	igd	2	TRUE	0.0059719	20.4745	39.4016
	rs7577824	A	G	A	G	-0.1227	0.0537009	0.4757	FALSE	FALSE	FALSE	UpSkaC	111119186	0.0221998	0.0234816	outcome	TRUE	reported	textfile	2.14699e-06	2	111876763	3410	0.02584	TRUE	reported	igd	2	TRUE	0.00656882	22.5346	39.4016
	rs78726632	C	G	C	G	-0.6159	-0.177491	0.0097	FALSE	TRUE	TRUE	UpSkaC	14156098	0.267189	0.159965	outcome	TRUE	reported	textfile	2.44399e-06	7	14195723	3410	0.1305	TRUE	reported	igd	2	FALSE	0.00648959	22.261	39.4016
	rs79631949	T	C	T	C	0.5111	-0.0379861	0.0136	FALSE	FALSE	FALSE	UpSkaC	12175166	0.788248	0.14143	outcome	TRUE	reported	textfile	7.71099e-06	17	12078483	3410	0.1141	TRUE	reported	igd	2	TRUE	0.00584976	20.0533	39.4016
	rs79691782	T	C	T	C	-0.223	0.0296144	0.0783	FALSE	FALSE	FALSE	UpSkaC	61249	0.55777	0.0505228	outcome	TRUE	reported	textfile	5.62898e-06	16	111247	3410	0.04904	TRUE	reported	igd	2	TRUE	0.00602738	20.6659	39.4016
	rs876036	C	T	C	T	0.1584	-0.030786	0.2645	FALSE	FALSE	FALSE	UpSkaC	50268114	0.227236	0.0254955	outcome	TRUE	reported	textfile	9.42193e-08	7	50307710	3410	0.02961	TRUE	reported	igd	2	TRUE	0.00832242	28.6008	39.4016
GCST90001460	rs10853636	G	A	G	A	0.1138	0.0396416	0.4413	FALSE	FALSE	FALSE	OAu7qW	53886173	0.0949271	0.0237381	outcome	TRUE	reported	textfile	2.72703e-06	18	51412543	3374	0.02422	TRUE	reported	igd	2	TRUE	0.00650068	22.0637	23.9208
	rs115638174	T	C	T	C	-0.7983	0.0842786	0.0052	FALSE	FALSE	FALSE	OAu7qW	177830208	0.313636	0.083641	outcome	TRUE	reported	textfile	1.59302e-06	2	178694935	3374	0.166	TRUE	reported	igd	2	TRUE	0.00680776	23.1131	23.9208
	rs117039412	A	T	A	T	2.012	0.0614679	0.0007	FALSE	TRUE	TRUE	OAu7qW	34614723	0.388881	0.0713376	outcome	TRUE	reported	textfile	1.31701e-06	8	34472241	3374	0.4152	TRUE	reported	igd	2	FALSE	0.00691169	23.4684	23.9208
	rs117112573	C	G	C	G	0.3807	-0.0918307	0.0202	FALSE	TRUE	TRUE	OAu7qW	53351642	0.154012	0.0644198	outcome	TRUE	reported	textfile	5.73694e-06	12	53745426	3374	0.0838	TRUE	reported	igd	2	FALSE	0.00607973	20.6262	23.9208
	rs11776881	C	A	C	A	0.1139	-0.0145121	0.4092	FALSE	FALSE	FALSE	OAu7qW	130793357	0.56732	0.0253708	outcome	TRUE	reported	textfile	3.14101e-06	8	131805603	3374	0.02439	TRUE	reported	igd	2	TRUE	0.00642215	21.7955	23.9208
	rs117839924	C	T	C	T	1.338	-0.0598637	0.0015	FALSE	FALSE	FALSE	OAu7qW	100950298	0.557797	0.102136	outcome	TRUE	reported	textfile	5.868e-06	12	101344076	3374	0.2948	TRUE	reported	igd	2	TRUE	0.00606832	20.5873	23.9208
	rs117990934	C	G	C	G	-1.178	-0.139712	0.0019	FALSE	TRUE	TRUE	OAu7qW	36702678	0.0343242	0.0660186	outcome	TRUE	reported	textfile	7.06708e-06	17	35059123	3374	0.2619	TRUE	reported	igd	2	FALSE	0.00596044	20.2191	23.9208
	rs12616455	A	G	A	G	0.1321	-0.0295172	0.7121	FALSE	FALSE	FALSE	OAu7qW	85469428	0.306982	0.0288938	outcome	TRUE	reported	textfile	5.57301e-07	2	85696551	3374	0.02633	TRUE	reported	igd	2	TRUE	0.0074051	25.1563	23.9208
	rs138423727	C	T	C	T	0.3131	0.0365665	0.0313	FALSE	FALSE	FALSE	OAu7qW	42713455	0.576163	0.0654142	outcome	TRUE	reported	textfile	5.55405e-06	15	43005653	3374	0.06882	TRUE	reported	igd	2	TRUE	0.00609727	20.6861	23.9208
	rs142129101	C	A	C	A	-0.7037	0.0262751	0.0056	FALSE	FALSE	FALSE	OAu7qW	3945623	0.606866	0.0510641	outcome	TRUE	reported	textfile	5.85302e-06	16	3995624	3374	0.155	TRUE	reported	igd	2	TRUE	0.00607186	20.5994	23.9208
	rs144152085	G	C	G	C	-1.824	0.00458447	0.0009	FALSE	TRUE	TRUE	OAu7qW	67185651	0.957822	0.0866854	outcome	TRUE	reported	textfile	4.16601e-06	6	67895544	3374	0.3956	TRUE	reported	igd	2	FALSE	0.0062613	21.2461	23.9208
	rs147983983	G	T	G	T	0.3127	0.190954	0.0319	FALSE	FALSE	FALSE	OAu7qW	83888029	0.259869	0.169481	outcome	TRUE	reported	textfile	6.69499e-06	16	83921634	3374	0.06932	TRUE	reported	igd	2	TRUE	0.0059949	20.3367	23.9208
	rs16944211	T	C	T	C	-1.205	-0.0734317	0.0027	FALSE	FALSE	FALSE	OAu7qW	11087722	0.187821	0.0557546	outcome	TRUE	reported	textfile	2.80899e-07	17	10991039	3374	0.2342	TRUE	reported	igd	2	TRUE	0.00778504	26.4571	23.9208
	rs16977238	A	G	A	G	0.152	0.0296272	0.1432	FALSE	FALSE	FALSE	OAu7qW	72431180	0.375828	0.0334541	outcome	TRUE	reported	textfile	8.07105e-06	17	70427321	3374	0.034	TRUE	reported	igd	2	TRUE	0.0058887	19.9743	23.9208
	rs17108993	G	C	G	C	-0.4462	-0.11786	0.0141	FALSE	TRUE	TRUE	OAu7qW	93604276	0.25381	0.103283	outcome	TRUE	reported	textfile	8.93203e-06	10	95364033	3374	0.1003	TRUE	reported	igd	2	FALSE	0.00583139	19.7788	23.9208
	rs17582557	C	T	C	T	0.4301	0.0734185	0.0169	FALSE	FALSE	FALSE	OAu7qW	101176303	0.134727	0.0490858	outcome	TRUE	reported	textfile	2.54302e-06	13	101828654	3374	0.09125	TRUE	reported	igd	2	TRUE	0.00654151	22.2032	23.9208
	rs186765793	T	C	T	C	-0.3111	0.00589527	0.0325	FALSE	FALSE	FALSE	OAu7qW	11496085	0.877573	0.0382695	outcome	TRUE	reported	textfile	4.41804e-06	7	11535712	3374	0.06766	TRUE	reported	igd	2	TRUE	0.00622699	21.129	23.9208
	rs192992420	T	C	T	C	-1.742	0.0306455	0.0012	FALSE	FALSE	FALSE	OAu7qW	19089962	0.878795	0.200958	outcome	TRUE	reported	textfile	6.77907e-06	3	19131454	3374	0.3865	TRUE	reported	igd	2	TRUE	0.00598474	20.302	23.9208
	rs2164210	C	T	C	T	0.1937	-0.0142213	0.3244	FALSE	FALSE	FALSE	OAu7qW	135822717	0.584226	0.0259881	outcome	TRUE	reported	textfile	2.11787e-13	2	136580287	3374	0.02628	TRUE	reported	igd	2	TRUE	0.0158462	54.2939	23.9208
	rs217667	T	C	T	C	0.1614	0.0279729	0.1457	FALSE	FALSE	FALSE	OAu7qW	61892129	0.35591	0.0303004	outcome	TRUE	reported	textfile	1.424e-06	14	62358847	3374	0.03341	TRUE	reported	igd	2	TRUE	0.00686935	23.3237	23.9208
	rs2545798	A	T	A	T	0.1163	-0.0112705	0.4813	FALSE	TRUE	TRUE	OAu7qW	177428626	0.635786	0.0237974	outcome	TRUE	reported	textfile	1.05201e-06	5	176855627	3374	0.02379	TRUE	reported	igd	2	FALSE	0.00703332	23.8843	23.9208
	rs2862050	T	C	T	C	-0.1453	-0.00154551	0.818	FALSE	FALSE	FALSE	OAu7qW	97931836	0.970864	0.042315	outcome	TRUE	reported	textfile	2.81598e-06	10	99691593	3374	0.03097	TRUE	reported	igd	2	TRUE	0.00648156	21.9984	23.9208
	rs55901425	C	T	C	T	1.044	-0.0714759	0.0028	FALSE	FALSE	FALSE	OAu7qW	80469725	0.32075	0.0719858	outcome	TRUE	reported	textfile	3.81101e-06	11	80180769	3374	0.2255	TRUE	reported	igd	2	TRUE	0.00631266	21.4215	23.9208
	rs62354582	T	C	T	C	0.5481	0.18647	0.0133	FALSE	FALSE	FALSE	OAu7qW	36514822	0.321837	0.188222	outcome	TRUE	reported	textfile	1.245e-07	5	36514924	3374	0.1034	TRUE	reported	igd	2	TRUE	0.00825908	28.0815	23.9208
	rs6708784	G	A	G	A	0.1169	0.054598	0.4784	FALSE	FALSE	FALSE	OAu7qW	111169802	0.0202372	0.0235141	outcome	TRUE	reported	textfile	1.243e-06	2	111927379	3374	0.02406	TRUE	reported	igd	2	TRUE	0.00694808	23.5928	23.9208
	rs6751072	T	C	T	C	-0.1841	-0.026591	0.0957	FALSE	FALSE	FALSE	OAu7qW	1966903	0.55335	0.0448606	outcome	TRUE	reported	textfile	8.41492e-06	2	1970675	3374	0.04126	TRUE	reported	igd	2	TRUE	0.00586609	19.8972	23.9208
	rs73064418	C	T	C	T	-0.2167	-0.0406741	0.0702	FALSE	FALSE	FALSE	OAu7qW	21535367	0.191519	0.0311417	outcome	TRUE	reported	textfile	5.68696e-06	7	21574985	3374	0.04768	TRUE	reported	igd	2	TRUE	0.00608485	20.6437	23.9208
	rs7560153	G	T	G	T	-0.6432	-0.00577081	0.0071	FALSE	FALSE	FALSE	OAu7qW	220719591	0.915708	0.0545233	outcome	TRUE	reported	textfile	6.51193e-06	2	221584311	3374	0.1424	TRUE	reported	igd	2	TRUE	0.00601048	20.3899	23.9208
	rs76924856	G	T	G	T	-0.2103	-0.00474933	0.0637	FALSE	FALSE	FALSE	OAu7qW	99997754	0.940986	0.0641531	outcome	TRUE	reported	textfile	7.32099e-06	14	100464091	3374	0.04684	TRUE	reported	igd	2	TRUE	0.00593899	20.1459	23.9208
	rs77908862	C	T	C	T	0.2251	-0.0667368	0.071	FALSE	FALSE	FALSE	OAu7qW	104978151	0.0830004	0.0384974	outcome	TRUE	reported	textfile	1.79399e-06	3	104696995	3374	0.04706	TRUE	reported	igd	2	TRUE	0.00673546	22.866	23.9208
	rs876039	C	G	C	G	-0.1971	-0.0305333	0.2619	FALSE	TRUE	TRUE	OAu7qW	50269215	0.231258	0.0255055	outcome	TRUE	reported	textfile	9.51481e-13	7	50308811	3374	0.02752	TRUE	reported	igd	2	FALSE	0.0149754	51.2648	23.9208
GCST90001461	rs115102594	G	C	G	C	-0.252	0.0131749	0.0603	FALSE	TRUE	TRUE	9FDQOD	36893781	0.694552	0.033551	outcome	TRUE	reported	textfile	3.434e-06	17	35251042	3374	0.05419	TRUE	reported	igd	2	FALSE	0.00636859	21.6125	40.8166
	rs115751481	A	T	A	T	-0.3782	0.0279273	0.0258	FALSE	TRUE	TRUE	9FDQOD	41490301	0.737639	0.0833699	outcome	TRUE	reported	textfile	3.843e-06	3	41531792	3374	0.08174	TRUE	reported	igd	2	FALSE	0.00630495	21.3952	40.8166
	rs11748731	T	C	T	C	0.3124	0.0221179	0.0362	FALSE	FALSE	FALSE	9FDQOD	30877953	0.824241	0.0995881	outcome	TRUE	reported	textfile	3.75396e-06	5	30878060	3374	0.06744	TRUE	reported	igd	2	TRUE	0.00631959	21.4452	40.8166
	rs12144062	T	C	T	C	0.1591	-0.0474269	0.1464	FALSE	FALSE	FALSE	9FDQOD	119581367	0.164371	0.0341072	outcome	TRUE	reported	textfile	8.00295e-06	1	120123990	3374	0.03557	TRUE	reported	igd	2	TRUE	0.00589468	19.9947	40.8166
	rs138192280	T	C	T	C	0.1545	-0.0464653	0.1679	FALSE	FALSE	FALSE	9FDQOD	85796689	0.10217	0.0284291	outcome	TRUE	reported	textfile	4.39805e-06	9	88411604	3374	0.0336	TRUE	reported	igd	2	TRUE	0.00622759	21.131	40.8166
	rs147431504	G	C	G	C	0.9392	0.377742	0.0039	FALSE	TRUE	TRUE	9FDQOD	2489627	0.455762	0.506463	outcome	TRUE	reported	textfile	2.78298e-06	20	2470273	3374	0.2001	TRUE	reported	igd	2	FALSE	0.0064871	22.0173	40.8166
	rs17017403	C	T	C	T	-0.195	-0.0509233	0.098	FALSE	FALSE	FALSE	9FDQOD	111677906	0.16092	0.0363223	outcome	TRUE	reported	textfile	4.68296e-06	2	112435483	3374	0.04252	TRUE	reported	igd	2	TRUE	0.00619496	21.0196	40.8166
	rs17438107	T	A	T	A	0.1983	-0.0765208	0.0917	FALSE	TRUE	TRUE	9FDQOD	162950771	0.333937	0.0791966	outcome	TRUE	reported	textfile	5.87706e-06	1	162920561	3374	0.04369	TRUE	reported	igd	2	FALSE	0.00606866	20.5885	40.8166
	rs191217950	A	G	A	G	0.6722	-0.181818	0.0096	FALSE	FALSE	FALSE	9FDQOD	160970881	0.389834	0.211436	outcome	TRUE	reported	textfile	1.276e-07	1	160940671	3374	0.127	TRUE	reported	igd	2	TRUE	0.00823481	27.9983	40.8166
	rs2322660	T	C	T	C	0.1262	-0.0139991	0.3254	FALSE	FALSE	FALSE	9FDQOD	135799749	0.590068	0.0259849	outcome	TRUE	reported	textfile	5.77205e-06	2	136557319	3374	0.02779	TRUE	reported	igd	2	TRUE	0.00607505	20.6103	40.8166
	rs2490034	A	G	A	G	0.1328	0.0403955	0.7432	FALSE	FALSE	FALSE	9FDQOD	3870655	0.245663	0.0347952	outcome	TRUE	reported	textfile	4.60596e-06	6	3870889	3374	0.02893	TRUE	reported	igd	2	TRUE	0.00620655	21.0592	40.8166
	rs28854187	A	G	A	G	0.1282	0.0298728	0.2964	FALSE	FALSE	FALSE	9FDQOD	72408080	0.241228	0.0254904	outcome	TRUE	reported	textfile	2.452e-06	8	73320315	3374	0.02716	TRUE	reported	igd	2	TRUE	0.00656014	22.2669	40.8166
	rs35802809	T	G	T	G	-0.3287	-0.0592681	0.0313	FALSE	FALSE	FALSE	9FDQOD	45977836	0.50078	0.0880311	outcome	TRUE	reported	textfile	5.94895e-06	7	46017435	3374	0.07248	TRUE	reported	igd	2	TRUE	0.00605869	20.5544	40.8166
	rs55971447	T	C	T	C	0.5889	-0.0378283	0.2358	FALSE	FALSE	FALSE	9FDQOD	161545536	0.327071	0.0385991	outcome	TRUE	reported	textfile	1.19812e-89	1	161515326	3374	0.02846	TRUE	reported	igd	2	TRUE	0.112611	427.913	40.8166
	rs62504404	A	G	A	G	0.125	-0.0385848	0.4843	FALSE	FALSE	FALSE	9FDQOD	38948550	0.111729	0.02426	outcome	TRUE	reported	textfile	5.47797e-07	8	38806068	3374	0.02491	TRUE	reported	igd	2	TRUE	0.00740795	25.1661	40.8166
	rs6782857	A	G	A	G	0.1846	0.0183478	0.1101	FALSE	FALSE	FALSE	9FDQOD	31144170	0.719191	0.051031	outcome	TRUE	reported	textfile	5.74103e-06	3	31185662	3374	0.04063	TRUE	reported	igd	2	TRUE	0.00608101	20.6306	40.8166
	rs7355664	C	G	C	G	0.1158	0.00188603	0.4502	FALSE	TRUE	TRUE	9FDQOD	47269324	0.937081	0.0238923	outcome	TRUE	reported	textfile	4.08498e-06	2	47496463	3374	0.0251	TRUE	reported	igd	2	FALSE	0.00626893	21.2722	40.8166
	rs75072970	C	T	C	T	0.3483	-0.00806073	0.0532	FALSE	FALSE	FALSE	9FDQOD	161088561	0.909312	0.0707665	outcome	TRUE	reported	textfile	9.7389e-10	1	161058351	3374	0.05681	TRUE	reported	igd	2	TRUE	0.0110179	37.5664	40.8166
	rs76168011	G	C	G	C	-0.7956	-0.154322	0.0049	FALSE	TRUE	TRUE	9FDQOD	4332913	0.143579	0.105513	outcome	TRUE	reported	textfile	9.74002e-06	7	4372544	3374	0.1796	TRUE	reported	igd	2	FALSE	0.00578247	19.6119	40.8166
	rs79275634	A	G	A	G	0.5945	0.00807009	0.0107	FALSE	FALSE	FALSE	9FDQOD	113208261	0.892667	0.0598094	outcome	TRUE	reported	textfile	1.98299e-06	5	112543958	3374	0.1248	TRUE	reported	igd	2	TRUE	0.00668064	22.6786	40.8166
	rs911228	A	G	A	G	0.1199	-0.0332156	0.5697	FALSE	FALSE	FALSE	9FDQOD	160175508	0.198858	0.0258525	outcome	TRUE	reported	textfile	3.08901e-06	1	160145298	3374	0.02567	TRUE	reported	igd	2	TRUE	0.00642455	21.8036	40.8166
	rs9590896	A	G	A	G	-0.1209	-0.0208964	0.3103	FALSE	FALSE	FALSE	9FDQOD	32303559	0.505543	0.0313857	outcome	TRUE	reported	textfile	9.57789e-06	13	32877696	3374	0.02728	TRUE	reported	igd	2	TRUE	0.00578759	19.6294	40.8166
GCST90001462	rs112701148	T	G	T	G	-0.2246	-0.0673341	0.0697	FALSE	FALSE	FALSE	eqe8z4	10175134	0.140547	0.0456888	outcome	TRUE	reported	textfile	7.69502e-06	18	10175131	3387	0.05013	TRUE	reported	igd	2	TRUE	0.00589173	20.0617	64.6645
	rs116910026	T	C	T	C	0.2767	-0.0454921	0.0512	FALSE	FALSE	FALSE	eqe8z4	19856366	0.64898	0.0999432	outcome	TRUE	reported	textfile	1.09401e-06	11	19877912	3387	0.05667	TRUE	reported	igd	2	TRUE	0.00698957	23.8262	64.6645
	rs139058442	A	G	A	G	0.3107	-0.0471661	0.0353	FALSE	FALSE	FALSE	eqe8z4	74939467	0.736416	0.140123	outcome	TRUE	reported	textfile	9.94489e-06	16	74973365	3387	0.07021	TRUE	reported	igd	2	TRUE	0.00574865	19.5717	64.6645
	rs139894456	A	C	A	C	-1.176	0.0932903	0.0025	FALSE	FALSE	FALSE	eqe8z4	140386090	0.551191	0.156534	outcome	TRUE	reported	textfile	5.12201e-06	8	141396189	3387	0.2575	TRUE	reported	igd	2	TRUE	0.00612039	20.8451	64.6645
	rs143140559	T	C	T	C	0.7418	-0.193998	0.0094	FALSE	FALSE	FALSE	eqe8z4	161002465	0.368863	0.215887	outcome	TRUE	reported	textfile	8.28209e-09	1	160972255	3387	0.1284	TRUE	reported	igd	2	TRUE	0.0097582	33.357	64.6645
	rs147678401	A	G	A	G	0.3283	-0.0339061	0.0437	FALSE	FALSE	FALSE	eqe8z4	161065990	0.535693	0.0547458	outcome	TRUE	reported	textfile	1.82898e-07	1	161035780	3387	0.06281	TRUE	reported	igd	2	TRUE	0.00800166	27.3041	64.6645
	rs149812305	C	T	C	T	-0.36	0.162829	0.0272	FALSE	FALSE	FALSE	eqe8z4	5459488	0.46325	0.221987	outcome	TRUE	reported	textfile	1.94299e-06	11	5480718	3387	0.0755	TRUE	reported	igd	2	TRUE	0.00666792	22.7224	64.6645
	rs151030554	A	C	A	C	-2.086	0.0220792	0.0009	FALSE	FALSE	FALSE	eqe8z4	57032124	0.674272	0.0525328	outcome	TRUE	reported	textfile	6.98104e-06	15	57324322	3387	0.4634	TRUE	reported	igd	2	TRUE	0.00594718	20.2516	64.6645
	rs17438107	T	A	T	A	0.2057	-0.0765208	0.0921	FALSE	TRUE	TRUE	eqe8z4	162950771	0.333937	0.0791966	outcome	TRUE	reported	textfile	3.37699e-06	1	162920561	3387	0.04421	TRUE	reported	igd	2	FALSE	0.00635105	21.6357	64.6645
	rs35519924	A	G	A	G	0.128	-0.0284388	0.3276	FALSE	FALSE	FALSE	eqe8z4	80827149	0.227065	0.023543	outcome	TRUE	reported	textfile	3.039e-06	15	81119490	3387	0.02738	TRUE	reported	igd	2	TRUE	0.00641128	21.8422	64.6645
	rs35740507	C	T	C	T	-4.152	0.063059	0.0001	FALSE	FALSE	FALSE	eqe8z4	89886337	0.5606	0.108358	outcome	TRUE	reported	textfile	2.23599e-06	4	90807488	3387	0.8762	TRUE	reported	igd	2	TRUE	0.00658602	22.4415	64.6645
	rs6048352	G	A	G	A	-0.1219	0.0286818	0.6811	FALSE	FALSE	FALSE	eqe8z4	22799716	0.254341	0.0251623	outcome	TRUE	reported	textfile	7.54797e-06	20	22780354	3387	0.02717	TRUE	reported	igd	2	TRUE	0.00590799	20.1174	64.6645
	rs71632979	G	A	G	A	0.7524	-0.0404557	0.2449	FALSE	FALSE	FALSE	eqe8z4	161556607	0.290303	0.0382575	outcome	TRUE	reported	textfile	1.40281e-150	1	161526397	3387	0.02735	TRUE	reported	igd	2	TRUE	0.182635	756.356	64.6645
	rs71639910	A	G	A	G	0.3586	0.0117126	0.0686	FALSE	FALSE	FALSE	eqe8z4	161967984	0.86793	0.0704357	outcome	TRUE	reported	textfile	2.04692e-12	1	161937774	3387	0.05081	TRUE	reported	igd	2	TRUE	0.0144933	49.7812	64.6645
	rs73231298	A	G	A	G	0.1337	0.0610206	0.287	FALSE	FALSE	FALSE	eqe8z4	126551487	0.0580537	0.0321959	outcome	TRUE	reported	textfile	1.86599e-06	12	127036033	3387	0.02799	TRUE	reported	igd	2	TRUE	0.00669154	22.8034	64.6645
	rs75055130	C	G	C	G	-1.139	-0.098146	0.0024	FALSE	TRUE	TRUE	eqe8z4	154330625	0.523653	0.153901	outcome	TRUE	reported	textfile	3.39203e-06	2	155187137	3387	0.2448	TRUE	reported	igd	2	FALSE	0.006351	21.6356	64.6645
	rs771894	A	G	A	G	0.2383	-0.179388	0.0602	FALSE	FALSE	FALSE	eqe8z4	1642516	0.0983785	0.108538	outcome	TRUE	reported	textfile	9.91402e-06	9	1642516	3387	0.05385	TRUE	reported	igd	2	TRUE	0.00574854	19.5713	64.6645
	rs9855547	G	T	G	T	0.1447	0.0374586	0.8091	FALSE	FALSE	FALSE	eqe8z4	163539695	0.113095	0.0236417	outcome	TRUE	reported	textfile	8.67801e-06	3	163257483	3387	0.03248	TRUE	reported	igd	2	TRUE	0.00582576	19.8357	64.6645
GCST90001463	rs112985320	T	C	T	C	-0.855	-0.0331927	0.0059	FALSE	FALSE	FALSE	rLjfAQ	67209752	0.562415	0.0573021	outcome	TRUE	reported	textfile	5.72598e-06	3	67260176	3410	0.1882	TRUE	reported	igd	2	TRUE	0.00601614	20.6271	NA
	rs11754319	T	G	T	G	-1.697	-0.172905	0.0012	FALSE	FALSE	FALSE	rLjfAQ	8259104	0.359766	0.188799	outcome	TRUE	reported	textfile	7.59696e-06	6	8259337	3410	0.3784	TRUE	reported	igd	2	TRUE	0.00586345	20.1005	NA
	rs138315340	T	A	T	A	0.2575	-0.0122957	0.0516	FALSE	TRUE	TRUE	rLjfAQ	19867673	0.840924	0.0612604	outcome	TRUE	reported	textfile	8.35391e-06	11	19889219	3410	0.05769	TRUE	reported	igd	2	FALSE	0.00580857	19.9113	NA
	rs143032729	G	A	G	A	0.4142	-0.10504	0.0326	FALSE	FALSE	FALSE	rLjfAQ	160383999	0.112413	0.0661697	outcome	TRUE	reported	textfile	3.971e-08	1	160353789	3410	0.07525	TRUE	reported	igd	2	TRUE	0.00880666	30.2798	NA
	rs143140559	T	C	T	C	0.6557	-0.193998	0.0094	FALSE	FALSE	FALSE	rLjfAQ	161002465	0.368863	0.215887	outcome	TRUE	reported	textfile	5.14802e-07	1	160972255	3410	0.1304	TRUE	reported	igd	2	TRUE	0.00736025	25.2697	NA
	rs148188224	G	C	G	C	-1.426	0.163274	0.0019	FALSE	TRUE	TRUE	rLjfAQ	65116067	0.0444693	0.081245	outcome	TRUE	reported	textfile	3.94703e-06	16	65149970	3410	0.3084	TRUE	reported	igd	2	FALSE	0.00623077	21.3676	NA
	rs149812305	C	T	C	T	-0.3592	0.162829	0.0271	FALSE	FALSE	FALSE	rLjfAQ	5459488	0.46325	0.221987	outcome	TRUE	reported	textfile	2.87799e-06	11	5480718	3410	0.07663	TRUE	reported	igd	2	TRUE	0.00640223	21.9594	NA
	rs1515318	A	G	A	G	-0.1257	0.00469795	0.435	FALSE	FALSE	FALSE	rLjfAQ	104565656	0.860974	0.0268249	outcome	TRUE	reported	textfile	2.34401e-06	1	105108278	3410	0.02658	TRUE	reported	igd	2	TRUE	0.00651579	22.3515	NA
	rs2024391	T	C	T	C	0.1625	0.0359945	0.1736	FALSE	FALSE	FALSE	rLjfAQ	11813245	0.258484	0.0318541	outcome	TRUE	reported	textfile	3.13098e-06	16	11907102	3410	0.0348	TRUE	reported	igd	2	TRUE	0.00635369	21.7918	NA
	rs2332920	G	A	G	A	0.1217	0.0532842	0.3752	FALSE	FALSE	FALSE	rLjfAQ	72819750	0.0838166	0.0308188	outcome	TRUE	reported	textfile	6.40103e-06	14	73286458	3410	0.02693	TRUE	reported	igd	2	TRUE	0.00595334	20.4105	NA
	NA	NA	NA	NA	NA	NA	NA	NA	NA	NA	NA	NA	NA	NA	NA	NA	NA	NA	NA	NA	NA	NA	NA	NA	NA	NA	NA	NA	NA	NA	NA	NA
	rs341029	A	G	A	G	-0.137	-0.0498232	0.7375	FALSE	FALSE	FALSE	rLjfAQ	76606729	0.0812999	0.0285816	outcome	TRUE	reported	textfile	3.25499e-06	1	77072414	3410	0.02939	TRUE	reported	igd	2	TRUE	0.00633183	21.7164	NA
	rs41275192	C	T	C	T	0.4062	0.00875588	0.021	FALSE	FALSE	FALSE	rLjfAQ	6458257	0.88547	0.0607885	outcome	TRUE	reported	textfile	7.61395e-06	11	6479487	3410	0.09061	TRUE	reported	igd	2	TRUE	0.00585897	20.085	NA
	rs4680245	A	G	A	G	-0.3312	0.0132598	0.0334	FALSE	FALSE	FALSE	rLjfAQ	156220743	0.875872	0.0848872	outcome	TRUE	reported	textfile	6.80503e-06	3	155938532	3410	0.07348	TRUE	reported	igd	2	TRUE	0.00592254	20.3043	NA
	rs56199187	T	C	T	C	0.7548	-0.0449578	0.2441	FALSE	FALSE	FALSE	rLjfAQ	161551141	0.242274	0.0384478	outcome	TRUE	reported	textfile	2.11349e-144	1	161520931	3410	0.02809	TRUE	reported	igd	2	TRUE	0.174741	721.615	NA
	rs5767014	C	T	C	T	-0.1368	-0.0247805	0.7776	FALSE	FALSE	FALSE	rLjfAQ	48078471	0.465935	0.0339873	outcome	TRUE	reported	textfile	8.76799e-06	22	48474288	3410	0.03073	TRUE	reported	igd	2	TRUE	0.00577798	19.8058	NA
	rs62300075	C	A	C	A	0.1381	0.0352141	0.3707	FALSE	FALSE	FALSE	rLjfAQ	43116523	0.150994	0.0245219	outcome	TRUE	reported	textfile	3.32499e-07	4	43118540	3410	0.027	TRUE	reported	igd	2	TRUE	0.00761353	26.146	NA
	rs6537835	A	G	A	G	-0.2072	0.0499299	0.8488	FALSE	FALSE	FALSE	rLjfAQ	114566293	0.114977	0.0316771	outcome	TRUE	reported	textfile	2.54302e-08	1	115108914	3410	0.03711	TRUE	reported	igd	2	TRUE	0.00905922	31.1561	NA
	rs702185	G	A	G	A	0.2232	-0.189665	0.0783	FALSE	FALSE	FALSE	rLjfAQ	1621830	0.123586	0.123168	outcome	TRUE	reported	textfile	4.41205e-06	9	1621830	3410	0.04854	TRUE	reported	igd	2	TRUE	0.0061624	21.1317	NA
	rs7163051	A	G	A	G	0.1266	-0.039279	0.3702	FALSE	FALSE	FALSE	rLjfAQ	68069190	0.132272	0.0260954	outcome	TRUE	reported	textfile	4.34901e-06	15	68361528	3410	0.02752	TRUE	reported	igd	2	TRUE	0.00616779	21.1503	NA
	rs75220521	G	T	G	T	1.355	-0.0430035	0.0023	FALSE	FALSE	FALSE	rLjfAQ	80950413	0.548272	0.0716305	outcome	TRUE	reported	textfile	3.498e-06	6	81660130	3410	0.2917	TRUE	reported	igd	2	TRUE	0.00628799	21.5651	NA
	rs78548019	T	C	T	C	-1.039	0.0478897	0.0031	FALSE	FALSE	FALSE	rLjfAQ	148052307	0.538948	0.077945	outcome	TRUE	reported	textfile	7.05602e-06	6	148373443	3410	0.231	TRUE	reported	igd	2	TRUE	0.00589772	20.2187	NA
	rs79979402	G	A	G	A	0.2373	0.109154	0.0679	FALSE	FALSE	FALSE	rLjfAQ	62062133	0.438195	0.1408	outcome	TRUE	reported	textfile	5.63599e-06	1	62527805	3410	0.05218	TRUE	reported	igd	2	TRUE	0.00602847	20.6696	NA
GCST90001464	rs112966518	G	T	G	T	-0.1444	-0.00175477	0.2149	FALSE	FALSE	FALSE	N5KEhD	75296401	0.943305	0.0246744	outcome	TRUE	reported	textfile	7.18406e-06	4	76221611	3387	0.03211	TRUE	reported	igd	2	TRUE	0.00593544	20.2114	62.3633
	rs113995133	A	G	A	G	-0.6058	0.0685658	0.0103	FALSE	FALSE	FALSE	N5KEhD	163515407	0.661582	0.15664	outcome	TRUE	reported	textfile	2.51102e-06	1	163485197	3387	0.1285	TRUE	reported	igd	2	TRUE	0.00651923	22.2124	62.3633
	rs115849513	T	A	T	A	-0.3927	0.0426683	0.0245	FALSE	TRUE	TRUE	N5KEhD	1786253	0.559769	0.0731643	outcome	TRUE	reported	textfile	2.495e-06	3	1827937	3387	0.08325	TRUE	reported	igd	2	FALSE	0.00652671	22.2381	62.3633
	rs12005879	A	G	A	G	-0.2492	0.0817111	0.0576	FALSE	FALSE	FALSE	N5KEhD	130862262	0.16878	0.0593772	outcome	TRUE	reported	textfile	6.52995e-06	9	133737649	3387	0.05518	TRUE	reported	igd	2	TRUE	0.00598563	20.3834	62.3633
	rs12134798	T	C	T	C	0.1639	-0.0318843	0.1673	FALSE	FALSE	FALSE	N5KEhD	119572761	0.279427	0.0294786	outcome	TRUE	reported	textfile	2.44602e-06	1	120115384	3387	0.03471	TRUE	reported	igd	2	TRUE	0.00654009	22.2839	62.3633
	rs139939515	T	C	T	C	-0.5561	-0.105427	0.0124	FALSE	FALSE	FALSE	N5KEhD	163989513	0.385966	0.121606	outcome	TRUE	reported	textfile	2.28202e-06	1	163958750	3387	0.1174	TRUE	reported	igd	2	TRUE	0.00658092	22.424	62.3633
	rs140205436	T	C	T	C	-2.409	0.0252849	0.0006	FALSE	FALSE	FALSE	N5KEhD	25724650	0.717238	0.0698181	outcome	TRUE	reported	textfile	2.476e-06	15	25969797	3387	0.5106	TRUE	reported	igd	2	TRUE	0.00652908	22.2462	62.3633
	rs143140559	T	C	T	C	0.7391	-0.193998	0.0094	FALSE	FALSE	FALSE	N5KEhD	161002465	0.368863	0.215887	outcome	TRUE	reported	textfile	1.55299e-08	1	160972255	3387	0.1304	TRUE	reported	igd	2	TRUE	0.00939585	32.1066	62.3633
	rs147678401	A	G	A	G	0.3116	-0.0339061	0.0437	FALSE	FALSE	FALSE	N5KEhD	161065990	0.535693	0.0547458	outcome	TRUE	reported	textfile	1.30101e-06	1	161035780	3387	0.06427	TRUE	reported	igd	2	TRUE	0.00689223	23.4921	62.3633
	rs16938204	T	C	T	C	0.1278	0.0241394	0.2938	FALSE	FALSE	FALSE	N5KEhD	72436391	0.360777	0.026414	outcome	TRUE	reported	textfile	5.94005e-06	8	73348626	3387	0.02818	TRUE	reported	igd	2	TRUE	0.00603581	20.5553	62.3633
	rs185312213	G	T	G	T	-0.7215	-0.102218	0.0066	FALSE	FALSE	FALSE	N5KEhD	51470392	0.410094	0.124092	outcome	TRUE	reported	textfile	4.52501e-06	14	51937110	3387	0.1571	TRUE	reported	igd	2	TRUE	0.00618884	21.0797	62.3633
	rs3789359	C	T	C	T	-0.3862	0.0552418	0.023	FALSE	FALSE	FALSE	N5KEhD	181051045	0.269635	0.0500422	outcome	TRUE	reported	textfile	6.158e-06	1	181020181	3387	0.08529	TRUE	reported	igd	2	TRUE	0.00601717	20.4914	62.3633
	rs6656063	T	C	T	C	0.1405	-0.0352519	0.2499	FALSE	FALSE	FALSE	N5KEhD	157995066	0.147451	0.0243352	outcome	TRUE	reported	textfile	2.093e-06	1	157964856	3387	0.02956	TRUE	reported	igd	2	TRUE	0.00662585	22.5781	62.3633
	rs71632979	G	A	G	A	0.8088	-0.0404557	0.2449	FALSE	FALSE	FALSE	N5KEhD	161556607	0.290303	0.0382575	outcome	TRUE	reported	textfile	9.7051e-166	1	161526397	3387	0.02785	TRUE	reported	igd	2	TRUE	0.199366	842.899	62.3633
	rs71639910	A	G	A	G	0.3667	0.0117126	0.0686	FALSE	FALSE	FALSE	N5KEhD	161967984	0.86793	0.0704357	outcome	TRUE	reported	textfile	2.25476e-12	1	161937774	3387	0.05205	TRUE	reported	igd	2	TRUE	0.0144427	49.6048	62.3633
	rs72711599	A	G	A	G	0.2153	0.0107321	0.0884	FALSE	FALSE	FALSE	N5KEhD	162782880	0.863689	0.0625121	outcome	TRUE	reported	textfile	2.91602e-06	1	162752670	3387	0.04595	TRUE	reported	igd	2	TRUE	0.00644015	21.9412	62.3633
	rs72846852	T	C	T	C	-0.3544	0.183074	0.0282	FALSE	FALSE	FALSE	N5KEhD	79257054	0.168046	0.132806	outcome	TRUE	reported	textfile	5.46903e-06	17	77253136	3387	0.07783	TRUE	reported	igd	2	TRUE	0.00608454	20.7222	62.3633
	rs75700156	C	T	C	T	-1.333	-0.114528	0.0021	FALSE	FALSE	FALSE	N5KEhD	43573617	0.236483	0.0967442	outcome	TRUE	reported	textfile	7.23902e-06	14	44042820	3387	0.2966	TRUE	reported	igd	2	TRUE	0.00592817	20.1865	62.3633
	rs79497887	G	C	G	C	-0.2163	-0.0143641	0.0865	FALSE	TRUE	TRUE	N5KEhD	57691233	0.790575	0.0540893	outcome	TRUE	reported	textfile	2.25798e-06	16	57725145	3387	0.04565	TRUE	reported	igd	2	FALSE	0.00658487	22.4375	62.3633
	rs923967	A	T	A	T	-0.1177	0.00166679	0.4074	FALSE	TRUE	TRUE	N5KEhD	115141083	0.946269	0.0247322	outcome	TRUE	reported	textfile	8.52806e-06	8	116153312	3387	0.0264	TRUE	reported	igd	2	FALSE	0.0058343	19.865	62.3633
	rs9557311	A	G	A	G	0.1673	-0.00585949	0.1333	FALSE	FALSE	FALSE	N5KEhD	99807063	0.853759	0.0317891	outcome	TRUE	reported	textfile	9.41499e-06	13	100459317	3387	0.03771	TRUE	reported	igd	2	TRUE	0.0057776	19.6708	62.3633
GCST90001465	rs113345111	G	A	G	A	0.2938	0.121316	0.0428	FALSE	FALSE	FALSE	viIsAP	24876019	0.327799	0.123974	outcome	TRUE	reported	textfile	6.30507e-06	18	22455983	3410	0.06497	TRUE	reported	igd	2	TRUE	0.00596111	20.4373	58.7065
	rs113404917	T	C	T	C	0.2353	-0.0843524	0.0633	FALSE	FALSE	FALSE	viIsAP	147140128	0.0621041	0.0452159	outcome	TRUE	reported	textfile	9.64295e-06	6	147461264	3410	0.05309	TRUE	reported	igd	2	TRUE	0.00572756	19.632	58.7065
	rs113995133	A	G	A	G	-0.6667	0.0685658	0.0103	FALSE	FALSE	FALSE	viIsAP	163515407	0.661582	0.15664	outcome	TRUE	reported	textfile	2.339e-07	1	163485197	3410	0.1287	TRUE	reported	igd	2	TRUE	0.0078081	26.8194	58.7065
	rs114566711	T	A	T	A	-1.864	-0.00187973	0.0009	FALSE	TRUE	TRUE	viIsAP	190586910	0.98424	0.0951576	outcome	TRUE	reported	textfile	1.948e-06	2	191451636	3410	0.391	TRUE	reported	igd	2	FALSE	0.00662063	22.7135	58.7065
	rs117690664	A	C	A	C	-2.515	-0.12914	0.0007	FALSE	FALSE	FALSE	viIsAP	106681486	0.255789	0.113639	outcome	TRUE	reported	textfile	1.123e-06	8	107693714	3410	0.5157	TRUE	reported	igd	2	TRUE	0.00692642	23.7699	58.7065
	rs139939515	T	C	T	C	-0.6222	-0.105427	0.0123	FALSE	FALSE	FALSE	viIsAP	163989513	0.385966	0.121606	outcome	TRUE	reported	textfile	1.30299e-07	1	163958750	3410	0.1176	TRUE	reported	igd	2	TRUE	0.00814217	27.9763	58.7065
	rs140205436	T	C	T	C	-2.273	0.0252849	0.0006	FALSE	FALSE	FALSE	viIsAP	25724650	0.717238	0.0698181	outcome	TRUE	reported	textfile	9.34394e-06	15	25969797	3410	0.5121	TRUE	reported	igd	2	TRUE	0.00574425	19.6895	58.7065
	rs143140559	T	C	T	C	0.6732	-0.193998	0.0094	FALSE	FALSE	FALSE	viIsAP	161002465	0.368863	0.215887	outcome	TRUE	reported	textfile	2.80098e-07	1	160972255	3410	0.1308	TRUE	reported	igd	2	TRUE	0.00770828	26.4739	58.7065
	rs143512471	A	G	A	G	-0.3741	-0.0571222	0.026	FALSE	FALSE	FALSE	viIsAP	63785946	0.615166	0.113628	outcome	TRUE	reported	textfile	4.62999e-06	5	63081773	3410	0.08154	TRUE	reported	igd	2	TRUE	0.00613489	21.0368	58.7065
	rs143555771	T	C	T	C	-1.586	9.3361e-05	0.0015	FALSE	FALSE	FALSE	viIsAP	88184502	0.998548	0.0513071	outcome	TRUE	reported	textfile	5.19302e-06	10	89944259	3410	0.3474	TRUE	reported	igd	2	TRUE	0.006075	20.8301	58.7065
	rs144259606	C	A	C	A	1.672	0.143756	0.001	FALSE	FALSE	FALSE	viIsAP	110038676	0.364257	0.158447	outcome	TRUE	reported	textfile	7.10101e-06	7	109678733	3410	0.3718	TRUE	reported	igd	2	TRUE	0.00589565	20.2115	58.7065
	rs1996740	G	A	G	A	-0.1204	0.028086	0.4776	FALSE	FALSE	FALSE	viIsAP	77827823	0.238548	0.0238295	outcome	TRUE	reported	textfile	4.06602e-06	4	78748977	3410	0.02608	TRUE	reported	igd	2	TRUE	0.00621123	21.3002	58.7065
	rs3789359	C	T	C	T	-0.3803	0.0552418	0.0229	FALSE	FALSE	FALSE	viIsAP	181051045	0.269635	0.0500422	outcome	TRUE	reported	textfile	8.93799e-06	1	181020181	3410	0.0855	TRUE	reported	igd	2	TRUE	0.00576838	19.7727	58.7065
	rs6656063	T	C	T	C	0.1357	-0.0352519	0.2501	FALSE	FALSE	FALSE	viIsAP	157995066	0.147451	0.0243352	outcome	TRUE	reported	textfile	4.635e-06	1	157964856	3410	0.02958	TRUE	reported	igd	2	TRUE	0.0061339	21.0334	58.7065
	rs71632979	G	A	G	A	0.8089	-0.0404557	0.2447	FALSE	FALSE	FALSE	viIsAP	161556607	0.290303	0.0382575	outcome	TRUE	reported	textfile	4.21697e-165	1	161526397	3410	0.02792	TRUE	reported	igd	2	TRUE	0.19753	838.888	58.7065
	rs71639910	A	G	A	G	0.3612	0.0117126	0.0688	FALSE	FALSE	FALSE	viIsAP	161967984	0.86793	0.0704357	outcome	TRUE	reported	textfile	4.9023e-12	1	161937774	3410	0.0521	TRUE	reported	igd	2	TRUE	0.0138991	48.0358	58.7065
	rs72745440	A	C	A	C	-0.5139	0.0372583	0.0141	FALSE	FALSE	FALSE	viIsAP	67314264	0.745322	0.114707	outcome	TRUE	reported	textfile	3.12702e-06	15	67606602	3410	0.11	TRUE	reported	igd	2	TRUE	0.00635985	21.8131	58.7065
	rs75358870	A	C	A	C	0.5691	0.292778	0.0128	FALSE	FALSE	FALSE	viIsAP	29701258	0.0364074	0.139928	outcome	TRUE	reported	textfile	1.66901e-06	14	30170464	3410	0.1186	TRUE	reported	igd	2	TRUE	0.00670704	23.0119	58.7065
	rs76522264	C	G	C	G	-2.6	-0.0482763	0.0004	FALSE	TRUE	TRUE	viIsAP	112020580	0.411876	0.0588309	outcome	TRUE	reported	textfile	3.079e-06	8	113032809	3410	0.5564	TRUE	reported	igd	2	FALSE	0.00636277	21.8232	58.7065
	rs77148097	G	A	G	A	-0.225	-0.0170057	0.0767	FALSE	FALSE	FALSE	viIsAP	98533234	0.828712	0.0786012	outcome	TRUE	reported	textfile	5.26296e-06	7	98162546	3410	0.04933	TRUE	reported	igd	2	TRUE	0.00606383	20.7916	58.7065
	rs77768825	G	A	G	A	0.2261	0.115527	0.0755	FALSE	FALSE	FALSE	viIsAP	30018881	0.0137259	0.0468791	outcome	TRUE	reported	textfile	6.09902e-06	19	30509788	3410	0.04991	TRUE	reported	igd	2	TRUE	0.00598227	20.5103	58.7065
	rs78169719	C	A	C	A	-0.443	-0.00254059	0.0177	FALSE	FALSE	FALSE	viIsAP	157795896	0.979182	0.0973592	outcome	TRUE	reported	textfile	4.67703e-06	7	157588588	3410	0.09659	TRUE	reported	igd	2	TRUE	0.00613081	21.0227	58.7065
	rs950485	C	A	C	A	0.1227	0.0311116	0.4919	FALSE	FALSE	FALSE	viIsAP	82351556	0.198986	0.0242218	outcome	TRUE	reported	textfile	2.01002e-06	1	82817239	3410	0.02577	TRUE	reported	igd	2	TRUE	0.00660432	22.6572	58.7065
GCST90001466	rs10248630	G	T	G	T	-0.1133	-0.00605366	0.5221	FALSE	FALSE	FALSE	h8L4c1	67650451	0.799794	0.0238696	outcome	TRUE	reported	textfile	5.53095e-06	7	67115438	3374	0.02489	TRUE	reported	igd	2	TRUE	0.00610388	20.7087	22.1935
	rs112496823	C	A	C	A	0.1603	-0.0540963	0.1768	FALSE	FALSE	FALSE	h8L4c1	35502564	0.168394	0.0392747	outcome	TRUE	reported	textfile	1.286e-06	17	33829583	3374	0.03305	TRUE	reported	igd	2	TRUE	0.00692407	23.5108	22.1935
	rs114468547	G	A	G	A	-0.2713	-0.0177923	0.0491	FALSE	FALSE	FALSE	h8L4c1	78021537	0.911684	0.160413	outcome	TRUE	reported	textfile	4.77101e-06	16	78055434	3374	0.05921	TRUE	reported	igd	2	TRUE	0.00618401	20.9822	22.1935
	rs11701450	G	C	G	C	0.3632	0.0651093	0.0252	FALSE	TRUE	TRUE	h8L4c1	33255729	0.333824	0.0673704	outcome	TRUE	reported	textfile	5.90201e-06	21	34628034	3374	0.08004	TRUE	reported	igd	2	FALSE	0.00606583	20.5788	22.1935
	rs118148569	T	C	T	C	0.2729	-0.0649644	0.0505	FALSE	FALSE	FALSE	h8L4c1	12925977	0.67796	0.156447	outcome	TRUE	reported	textfile	2.362e-06	16	13019834	3374	0.05772	TRUE	reported	igd	2	TRUE	0.00658175	22.3407	22.1935
	rs11852100	C	A	C	A	0.2639	0.0337472	0.0587	FALSE	FALSE	FALSE	h8L4c1	36008840	0.35937	0.0368192	outcome	TRUE	reported	textfile	1.527e-06	14	36478046	3374	0.0548	TRUE	reported	igd	2	TRUE	0.00682649	23.1772	22.1935
	rs13088702	C	T	C	T	0.3946	0.0629145	0.0252	FALSE	FALSE	FALSE	h8L4c1	121995172	0.118832	0.0403377	outcome	TRUE	reported	textfile	7.45401e-07	3	121714019	3374	0.07957	TRUE	reported	igd	2	TRUE	0.00723629	24.5786	22.1935
	rs139557155	G	A	G	A	0.2575	0.0882564	0.0578	FALSE	FALSE	FALSE	h8L4c1	74968560	0.314913	0.0878203	outcome	TRUE	reported	textfile	2.52203e-06	9	77583476	3374	0.05462	TRUE	reported	igd	2	TRUE	0.00654417	22.2123	22.1935
	rs140090913	A	G	A	G	-1.091	0.374867	0.0028	FALSE	FALSE	FALSE	h8L4c1	18727449	0.221331	0.306516	outcome	TRUE	reported	textfile	6.19498e-06	8	18584959	3374	0.2411	TRUE	reported	igd	2	TRUE	0.00603229	20.4643	22.1935
	rs142245023	A	G	A	G	0.7025	0.0605829	0.0067	FALSE	FALSE	FALSE	h8L4c1	69167517	0.431969	0.0770945	outcome	TRUE	reported	textfile	3.17198e-06	14	69634234	3374	0.1505	TRUE	reported	igd	2	TRUE	0.00641622	21.7752	22.1935
	rs150206669	G	C	G	C	-0.4937	-0.189774	0.0123	FALSE	TRUE	TRUE	h8L4c1	68630058	0.00241563	0.062555	outcome	TRUE	reported	textfile	8.30692e-06	18	66297295	3374	0.1106	TRUE	reported	igd	2	FALSE	0.00587102	19.914	22.1935
	rs1991164	C	T	C	T	-0.117	-0.0219808	0.5529	FALSE	FALSE	FALSE	h8L4c1	1729083	0.3551	0.0237696	outcome	TRUE	reported	textfile	3.13798e-06	2	1732855	3374	0.02506	TRUE	reported	igd	2	TRUE	0.00641901	21.7847	22.1935
	rs2725015	G	A	G	A	-0.1473	0.047918	0.266	FALSE	FALSE	FALSE	h8L4c1	4607579	0.0784856	0.0272332	outcome	TRUE	reported	textfile	2.16601e-07	8	4465101	3374	0.02834	TRUE	reported	igd	2	TRUE	0.00794323	26.999	22.1935
	rs313778	T	C	T	C	-0.2171	-0.0947657	0.0702	FALSE	FALSE	FALSE	h8L4c1	3313323	0.159119	0.0673032	outcome	TRUE	reported	textfile	8.44695e-06	19	3313321	3374	0.04867	TRUE	reported	igd	2	TRUE	0.00586271	19.8856	22.1935
	rs56164117	C	T	C	T	-0.1223	-0.0207472	0.3543	FALSE	FALSE	FALSE	h8L4c1	44707679	0.405963	0.024966	outcome	TRUE	reported	textfile	2.86603e-06	1	45173351	3374	0.02608	TRUE	reported	igd	2	TRUE	0.00647547	21.9776	22.1935
	rs61852527	G	A	G	A	-0.2618	-0.0210229	0.0649	FALSE	FALSE	FALSE	h8L4c1	88620832	0.84444	0.107141	outcome	TRUE	reported	textfile	2.84197e-07	10	90380589	3374	0.0509	TRUE	reported	igd	2	TRUE	0.00777977	26.4391	22.1935
	rs75070627	C	T	C	T	0.9624	-0.0858122	0.0037	FALSE	FALSE	FALSE	h8L4c1	96017568	0.290076	0.0811114	outcome	TRUE	reported	textfile	1.18801e-06	15	96560797	3374	0.1978	TRUE	reported	igd	2	TRUE	0.0069675	23.6593	22.1935
	rs78379738	G	T	G	T	0.3098	-0.00927348	0.0368	FALSE	FALSE	FALSE	h8L4c1	148939246	0.921516	0.0941233	outcome	TRUE	reported	textfile	5.41801e-06	5	148318809	3374	0.06801	TRUE	reported	igd	2	TRUE	0.00611237	20.7377	22.1935
	rs79116372	T	A	T	A	-0.3011	0.0421004	0.0375	FALSE	TRUE	TRUE	h8L4c1	36450861	0.524956	0.0662242	outcome	TRUE	reported	textfile	4.44396e-06	8	36308379	3374	0.06551	TRUE	reported	igd	2	FALSE	0.00622229	21.1129	22.1935
	rs9513487	G	T	G	T	0.1234	0.0221387	0.3251	FALSE	FALSE	FALSE	h8L4c1	98775792	0.363041	0.0243393	outcome	TRUE	reported	textfile	4.67498e-06	13	99428046	3374	0.0269	TRUE	reported	igd	2	TRUE	0.00619841	21.0314	22.1935
GCST90001467	rs10170363	T	C	T	C	0.1318	0.00814024	0.2944	FALSE	FALSE	FALSE	DTFxVI	15132681	0.741218	0.0246495	outcome	TRUE	reported	textfile	9.80189e-07	2	15272805	3410	0.02687	TRUE	reported	igd	2	TRUE	0.00700628	24.0459	24.7847
	rs11166208	A	G	A	G	-1.201	0.0338401	0.0021	FALSE	FALSE	FALSE	DTFxVI	99272498	0.893333	0.252373	outcome	TRUE	reported	textfile	9.93802e-06	1	99738054	3410	0.2713	TRUE	reported	igd	2	TRUE	0.00571404	19.5854	24.7847
	rs11231693	A	G	A	G	-0.2631	-0.026222	0.0554	FALSE	FALSE	FALSE	DTFxVI	64095140	0.564139	0.0454687	outcome	TRUE	reported	textfile	1.44601e-06	11	63862612	3410	0.05451	TRUE	reported	igd	2	TRUE	0.00678544	23.2828	24.7847
	rs112496823	C	A	C	A	0.1585	-0.0540963	0.1771	FALSE	FALSE	FALSE	DTFxVI	35502564	0.168394	0.0392747	outcome	TRUE	reported	textfile	1.72001e-06	17	33829583	3410	0.03308	TRUE	reported	igd	2	TRUE	0.00668743	22.9442	24.7847
	rs116872766	C	G	C	G	-0.9025	0.0527104	0.0045	FALSE	TRUE	TRUE	DTFxVI	76970898	0.571252	0.0930938	outcome	TRUE	reported	textfile	7.20195e-07	8	77883134	3410	0.1818	TRUE	reported	igd	2	FALSE	0.00717505	24.6293	24.7847
	rs117919713	G	C	G	C	0.2457	-0.0398832	0.0588	FALSE	TRUE	TRUE	DTFxVI	74530871	0.770804	0.136904	outcome	TRUE	reported	textfile	6.553e-06	9	77145787	3410	0.05442	TRUE	reported	igd	2	FALSE	0.00594224	20.3722	24.7847
	rs11811863	T	C	T	C	-0.1537	0.0213866	0.2186	FALSE	FALSE	FALSE	DTFxVI	247414554	0.497099	0.0314944	outcome	TRUE	reported	textfile	6.62598e-07	1	247577856	3410	0.03086	TRUE	reported	igd	2	TRUE	0.00722194	24.7914	24.7847
	rs11852100	C	A	C	A	0.2436	0.0337472	0.0587	FALSE	FALSE	FALSE	DTFxVI	36008840	0.35937	0.0368192	outcome	TRUE	reported	textfile	8.60696e-06	14	36478046	3410	0.05467	TRUE	reported	igd	2	TRUE	0.0057887	19.8427	24.7847
	rs12311260	G	C	G	C	0.2649	0.0241572	0.0501	FALSE	TRUE	TRUE	DTFxVI	17941138	0.535519	0.0389882	outcome	TRUE	reported	textfile	4.38399e-06	12	18094072	3410	0.0576	TRUE	reported	igd	2	FALSE	0.00616424	21.138	24.7847
	rs139557155	G	A	G	A	0.277	0.0882564	0.0578	FALSE	FALSE	FALSE	DTFxVI	74968560	0.314913	0.0878203	outcome	TRUE	reported	textfile	3.92799e-07	9	77583476	3410	0.05451	TRUE	reported	igd	2	TRUE	0.00751582	25.8079	24.7847
	rs140090913	A	G	A	G	-1.154	0.374867	0.0028	FALSE	FALSE	FALSE	DTFxVI	18727449	0.221331	0.306516	outcome	TRUE	reported	textfile	2.174e-06	8	18584959	3410	0.2432	TRUE	reported	igd	2	TRUE	0.00655952	22.5024	24.7847
	rs150206669	G	C	G	C	-0.4931	-0.189774	0.0125	FALSE	TRUE	TRUE	DTFxVI	68630058	0.00241563	0.062555	outcome	TRUE	reported	textfile	8.45493e-06	18	66297295	3410	0.1106	TRUE	reported	igd	2	FALSE	0.00579537	19.8657	24.7847
	rs2955695	A	T	A	T	-0.1122	-0.0172687	0.4499	FALSE	TRUE	TRUE	DTFxVI	34742418	0.469934	0.0238984	outcome	TRUE	reported	textfile	5.78203e-06	15	35034619	3410	0.0247	TRUE	reported	igd	2	FALSE	0.00601475	20.6223	24.7847
	rs34692286	C	G	C	G	-0.114	0.0279524	0.3865	FALSE	TRUE	TRUE	DTFxVI	27563015	0.255158	0.0245647	outcome	TRUE	reported	textfile	9.75102e-06	13	28137152	3410	0.02574	TRUE	reported	igd	2	FALSE	0.00571936	19.6037	24.7847
	rs3845548	T	C	T	C	-0.2739	-0.0363441	0.2345	FALSE	FALSE	FALSE	DTFxVI	161537658	0.348419	0.0387604	outcome	TRUE	reported	textfile	1.98381e-20	1	161507448	3410	0.02938	TRUE	reported	igd	2	TRUE	0.024854	86.8612	24.7847
	rs513617	T	C	T	C	0.1173	-0.000842468	0.3594	FALSE	FALSE	FALSE	DTFxVI	33947797	0.97359	0.0254476	outcome	TRUE	reported	textfile	9.1939e-06	1	34413398	3410	0.0264	TRUE	reported	igd	2	TRUE	0.00575608	19.7303	24.7847
	rs55966096	C	T	C	T	-0.1321	-0.000235372	0.3085	FALSE	FALSE	FALSE	DTFxVI	4617427	0.992512	0.0250803	outcome	TRUE	reported	textfile	1.36101e-06	8	4474949	3410	0.02729	TRUE	reported	igd	2	TRUE	0.00682449	23.4177	24.7847
	rs61852527	G	A	G	A	-0.2768	-0.0210229	0.0648	FALSE	FALSE	FALSE	DTFxVI	88620832	0.84444	0.107141	outcome	TRUE	reported	textfile	5.53694e-08	10	90380589	3410	0.05083	TRUE	reported	igd	2	TRUE	0.00862139	29.6372	24.7847
	rs6463191	A	G	A	G	-0.1275	-0.0130342	0.3198	FALSE	FALSE	FALSE	DTFxVI	43452580	0.579753	0.0235382	outcome	TRUE	reported	textfile	1.68702e-06	7	43492179	3410	0.02658	TRUE	reported	igd	2	TRUE	0.00670248	22.9962	24.7847
	rs66967216	A	G	A	G	-0.3759	-0.119754	0.0265	FALSE	FALSE	FALSE	DTFxVI	190077385	0.278312	0.110463	outcome	TRUE	reported	textfile	1.76799e-06	2	190942111	3410	0.07853	TRUE	reported	igd	2	TRUE	0.00667438	22.8991	24.7847
	rs6930632	T	C	T	C	-0.1504	0.0240224	0.1789	FALSE	FALSE	FALSE	DTFxVI	155451847	0.361901	0.0263476	outcome	TRUE	reported	textfile	3.80803e-06	6	155772981	3410	0.03249	TRUE	reported	igd	2	TRUE	0.00624484	21.4162	24.7847
	rs71381356	C	T	C	T	-0.2097	-0.01697	0.0845	FALSE	FALSE	FALSE	DTFxVI	51831217	0.690162	0.0425704	outcome	TRUE	reported	textfile	3.176e-06	17	49908577	3410	0.04494	TRUE	reported	igd	2	TRUE	0.00634471	21.7609	24.7847
	rs72810797	T	C	T	C	-0.4408	0.0291235	0.0172	FALSE	FALSE	FALSE	DTFxVI	30047743	0.722677	0.0820649	outcome	TRUE	reported	textfile	5.27898e-06	10	30336672	3410	0.09664	TRUE	reported	igd	2	TRUE	0.0060642	20.7929	24.7847
	rs75070627	C	T	C	T	0.9606	-0.0858122	0.0037	FALSE	FALSE	FALSE	DTFxVI	96017568	0.290076	0.0811114	outcome	TRUE	reported	textfile	1.73201e-06	15	96560797	3410	0.2005	TRUE	reported	igd	2	TRUE	0.00668634	22.9404	24.7847
	rs78379738	G	T	G	T	0.3227	-0.00927348	0.0364	FALSE	FALSE	FALSE	DTFxVI	148939246	0.921516	0.0941233	outcome	TRUE	reported	textfile	2.34202e-06	5	148318809	3410	0.06823	TRUE	reported	igd	2	TRUE	0.00651708	22.3559	24.7847
	rs9513487	G	T	G	T	0.131	0.0221387	0.326	FALSE	FALSE	FALSE	DTFxVI	98775792	0.363041	0.0243393	outcome	TRUE	reported	textfile	1.065e-06	13	99428046	3410	0.0268	TRUE	reported	igd	2	TRUE	0.00695803	23.8791	24.7847
	rs9607320	T	C	T	C	0.1192	0.016029	0.6037	FALSE	FALSE	FALSE	DTFxVI	21847875	0.521532	0.0250067	outcome	TRUE	reported	textfile	3.67198e-06	22	22202164	3410	0.02572	TRUE	reported	igd	2	TRUE	0.00625935	21.4662	24.7847
GCST90001468	rs10779896	T	A	T	A	-0.2364	-0.0214023	0.0633	FALSE	TRUE	TRUE	2xAmVg	4565460	0.512763	0.0326981	outcome	TRUE	reported	textfile	9.82992e-06	2	4613050	3387	0.05339	TRUE	reported	igd	2	FALSE	0.00575511	19.5938	76.6245
	rs112501424	T	C	T	C	0.1694	-0.0237029	0.1305	FALSE	FALSE	FALSE	2xAmVg	3045629	0.591336	0.0441476	outcome	TRUE	reported	textfile	8.03693e-06	19	3045627	3387	0.03788	TRUE	reported	igd	2	TRUE	0.00586996	19.9871	76.6245
	rs112701148	T	G	T	G	-0.2301	-0.0673341	0.0697	FALSE	FALSE	FALSE	2xAmVg	10175134	0.140547	0.0456888	outcome	TRUE	reported	textfile	7.05895e-06	18	10175131	3387	0.05114	TRUE	reported	igd	2	TRUE	0.00594167	20.2328	76.6245
	rs116910026	T	C	T	C	0.2902	-0.0454921	0.0512	FALSE	FALSE	FALSE	2xAmVg	19856366	0.64898	0.0999432	outcome	TRUE	reported	textfile	5.38704e-07	11	19877912	3387	0.05778	TRUE	reported	igd	2	TRUE	0.00739268	25.2106	76.6245
	rs11830537	T	C	T	C	-0.314	-0.0336741	0.0371	FALSE	FALSE	FALSE	2xAmVg	47763920	0.418623	0.041634	outcome	TRUE	reported	textfile	7.11705e-06	12	48157703	3387	0.06982	TRUE	reported	igd	2	TRUE	0.00593607	20.2136	76.6245
	rs13148506	T	C	T	C	0.1304	0.0355861	0.3691	FALSE	FALSE	FALSE	2xAmVg	43121465	0.146835	0.0245286	outcome	TRUE	reported	textfile	1.61901e-06	4	43123482	3387	0.02714	TRUE	reported	igd	2	TRUE	0.00676971	23.0717	76.6245
	rs143140559	T	C	T	C	0.8211	-0.193998	0.0094	FALSE	FALSE	FALSE	2xAmVg	161002465	0.368863	0.215887	outcome	TRUE	reported	textfile	3.33903e-10	1	160972255	3387	0.1303	TRUE	reported	igd	2	TRUE	0.0115885	39.6869	76.6245
	rs147678401	A	G	A	G	0.3306	-0.0339061	0.0437	FALSE	FALSE	FALSE	2xAmVg	161065990	0.535693	0.0547458	outcome	TRUE	reported	textfile	2.86101e-07	1	161035780	3387	0.06429	TRUE	reported	igd	2	TRUE	0.00774687	26.4279	76.6245
	rs17071426	T	C	T	C	-0.6001	-0.0350295	0.0084	FALSE	FALSE	FALSE	2xAmVg	48159189	0.642242	0.0754028	outcome	TRUE	reported	textfile	9.04295e-06	13	48733325	3387	0.135	TRUE	reported	igd	2	TRUE	0.00580014	19.748	76.6245
	rs17438107	T	A	T	A	0.2161	-0.0765208	0.0921	FALSE	TRUE	TRUE	2xAmVg	162950771	0.333937	0.0791966	outcome	TRUE	reported	textfile	1.83502e-06	1	162920561	3387	0.04523	TRUE	reported	igd	2	FALSE	0.00669459	22.8139	76.6245
	rs35519924	A	G	A	G	0.1281	-0.0284388	0.3276	FALSE	FALSE	FALSE	2xAmVg	80827149	0.227065	0.023543	outcome	TRUE	reported	textfile	5.03802e-06	15	81119490	3387	0.02803	TRUE	reported	igd	2	TRUE	0.00612868	20.8735	76.6245
	rs4997747	C	T	C	T	0.1346	0.0610601	0.2917	FALSE	FALSE	FALSE	2xAmVg	126552004	0.0579029	0.0321974	outcome	TRUE	reported	textfile	2.29198e-06	12	127036550	3387	0.02844	TRUE	reported	igd	2	TRUE	0.00656981	22.3859	76.6245
	rs5767014	C	T	C	T	-0.1397	-0.0247805	0.7772	FALSE	FALSE	FALSE	2xAmVg	48078471	0.465935	0.0339873	outcome	TRUE	reported	textfile	6.08303e-06	22	48474288	3387	0.03083	TRUE	reported	igd	2	TRUE	0.00602568	20.5206	76.6245
	rs71632979	G	A	G	A	0.8094	-0.0404557	0.2449	FALSE	FALSE	FALSE	2xAmVg	161556607	0.290303	0.0382575	outcome	TRUE	reported	textfile	9.84011e-166	1	161526397	3387	0.02787	TRUE	reported	igd	2	TRUE	0.199373	842.939	76.6245
	rs71639910	A	G	A	G	0.401	0.0117126	0.0686	FALSE	FALSE	FALSE	2xAmVg	161967984	0.86793	0.0704357	outcome	TRUE	reported	textfile	1.66303e-14	1	161937774	3387	0.05202	TRUE	reported	igd	2	TRUE	0.0172417	59.387	76.6245
	rs73172229	T	C	T	C	-0.1908	0.033075	0.1233	FALSE	FALSE	FALSE	2xAmVg	179476733	0.512179	0.0504617	outcome	TRUE	reported	textfile	1.77101e-06	3	179194521	3387	0.03986	TRUE	reported	igd	2	TRUE	0.00671953	22.8995	76.6245
GCST90001469	rs10779896	T	A	T	A	-0.2427	-0.0214023	0.0632	FALSE	TRUE	TRUE	hsCRwl	4565460	0.512763	0.0326981	outcome	TRUE	reported	textfile	4.04297e-06	2	4613050	3410	0.05258	TRUE	reported	igd	2	FALSE	0.00620925	21.2933	61.013
	rs116473040	G	A	G	A	0.4063	0.0118793	0.0198	FALSE	FALSE	FALSE	hsCRwl	82333776	0.826446	0.0541787	outcome	TRUE	reported	textfile	7.39997e-06	17	80291652	3410	0.09051	TRUE	reported	igd	2	TRUE	0.00587472	20.1394	61.013
	rs116910026	T	C	T	C	0.273	-0.0454921	0.0512	FALSE	FALSE	FALSE	hsCRwl	19856366	0.64898	0.0999432	outcome	TRUE	reported	textfile	1.82201e-06	11	19877912	3410	0.05712	TRUE	reported	igd	2	TRUE	0.00665419	22.8294	61.013
	rs143140559	T	C	T	C	0.7929	-0.193998	0.0094	FALSE	FALSE	FALSE	hsCRwl	161002465	0.368863	0.215887	outcome	TRUE	reported	textfile	1.00501e-09	1	160972255	3410	0.1294	TRUE	reported	igd	2	TRUE	0.0108908	37.5244	61.013
	rs143586943	A	G	A	G	-1.817	-0.376921	0.001	FALSE	FALSE	FALSE	hsCRwl	55572097	0.159545	0.267965	outcome	TRUE	reported	textfile	8.18295e-06	3	55606125	3410	0.4068	TRUE	reported	igd	2	TRUE	0.00581648	19.9385	61.013
	rs147678401	A	G	A	G	0.3059	-0.0339061	0.0437	FALSE	FALSE	FALSE	hsCRwl	161065990	0.535693	0.0547458	outcome	TRUE	reported	textfile	1.48102e-06	1	161035780	3410	0.06344	TRUE	reported	igd	2	TRUE	0.00677216	23.2369	61.013
	rs149812305	C	T	C	T	-0.3397	0.162829	0.0271	FALSE	FALSE	FALSE	hsCRwl	5459488	0.46325	0.221987	outcome	TRUE	reported	textfile	8.40795e-06	11	5480718	3410	0.07614	TRUE	reported	igd	2	TRUE	0.00580341	19.8935	61.013
	rs16864449	G	A	G	A	-1.124	0.0753928	0.0026	FALSE	FALSE	FALSE	hsCRwl	189502796	0.113366	0.0476192	outcome	TRUE	reported	textfile	2.83903e-06	3	189220585	3410	0.2398	TRUE	reported	igd	2	TRUE	0.00640163	21.9573	61.013
	rs17438107	T	A	T	A	0.1995	-0.0765208	0.0919	FALSE	TRUE	TRUE	hsCRwl	162950771	0.333937	0.0791966	outcome	TRUE	reported	textfile	8.32492e-06	1	162920561	3410	0.04469	TRUE	reported	igd	2	FALSE	0.00581005	19.9164	61.013
	rs17637703	G	A	G	A	0.1393	-0.0140445	0.2437	FALSE	FALSE	FALSE	hsCRwl	45399229	0.646873	0.0306575	outcome	TRUE	reported	textfile	3.94103e-06	3	45440721	3410	0.03014	TRUE	reported	igd	2	TRUE	0.00622514	21.3482	61.013
	rs17780615	T	C	T	C	-0.1776	-0.00858216	0.1226	FALSE	FALSE	FALSE	hsCRwl	72562901	0.864158	0.0501635	outcome	TRUE	reported	textfile	7.44698e-06	14	73029609	3410	0.03958	TRUE	reported	igd	2	TRUE	0.0058698	20.1224	61.013
	rs181905377	T	C	T	C	-0.748	-0.16626	0.0056	FALSE	FALSE	FALSE	hsCRwl	135789177	0.0758997	0.0936681	outcome	TRUE	reported	textfile	9.20407e-06	9	138681023	3410	0.1684	TRUE	reported	igd	2	TRUE	0.00575253	19.7181	61.013
	rs3012723	C	T	C	T	0.2018	0.0186463	0.9157	FALSE	FALSE	FALSE	hsCRwl	131770236	0.500184	0.0276569	outcome	TRUE	reported	textfile	9.14092e-06	9	134645623	3410	0.04542	TRUE	reported	igd	2	TRUE	0.00575555	19.7285	61.013
	rs34558449	C	G	C	G	0.2273	0.0737612	0.0846	FALSE	TRUE	TRUE	hsCRwl	192597217	0.179993	0.0550138	outcome	TRUE	reported	textfile	7.51208e-07	1	192566347	3410	0.04585	TRUE	reported	igd	2	FALSE	0.00715562	24.5621	61.013
	rs5767014	C	T	C	T	-0.1514	-0.0247805	0.7776	FALSE	FALSE	FALSE	hsCRwl	48078471	0.465935	0.0339873	outcome	TRUE	reported	textfile	6.94592e-07	22	48474288	3410	0.03046	TRUE	reported	igd	2	TRUE	0.00719287	24.6909	61.013
	rs62300075	C	A	C	A	0.1382	0.0352141	0.3707	FALSE	FALSE	FALSE	hsCRwl	43116523	0.150994	0.0245219	outcome	TRUE	reported	textfile	2.524e-07	4	43118540	3410	0.02676	TRUE	reported	igd	2	TRUE	0.00776079	26.6556	61.013
	rs6492701	C	A	C	A	-0.1278	0.00788959	0.7111	FALSE	FALSE	FALSE	hsCRwl	94391397	0.738049	0.0235905	outcome	TRUE	reported	textfile	7.75104e-06	13	95043651	3410	0.02853	TRUE	reported	igd	2	TRUE	0.00585	20.0541	61.013
	rs6537835	A	G	A	G	-0.1661	0.0499299	0.8488	FALSE	FALSE	FALSE	hsCRwl	114566293	0.114977	0.0316771	outcome	TRUE	reported	textfile	6.55798e-06	1	115108914	3410	0.0368	TRUE	reported	igd	2	TRUE	0.00593885	20.3605	61.013
	rs7148140	G	C	G	C	0.2287	0.0388631	0.0682	FALSE	TRUE	TRUE	hsCRwl	88121397	0.390256	0.0452342	outcome	TRUE	reported	textfile	9.50802e-06	14	88587741	3410	0.05156	TRUE	reported	igd	2	FALSE	0.00573659	19.6631	61.013
	rs71632979	G	A	G	A	0.8232	-0.0404557	0.2447	FALSE	FALSE	FALSE	hsCRwl	161556607	0.290303	0.0382575	outcome	TRUE	reported	textfile	8.531e-178	1	161526397	3410	0.02725	TRUE	reported	igd	2	TRUE	0.211122	912.059	61.013
	rs71639910	A	G	A	G	0.4169	0.0117126	0.0688	FALSE	FALSE	FALSE	hsCRwl	161967984	0.86793	0.0704357	outcome	TRUE	reported	textfile	5.85868e-16	1	161937774	3410	0.05126	TRUE	reported	igd	2	TRUE	0.0190287	66.1077	61.013
	rs72743439	T	C	T	C	1.099	0.00556098	0.0031	FALSE	FALSE	FALSE	hsCRwl	67117750	0.928935	0.0623536	outcome	TRUE	reported	textfile	4.39602e-06	15	67410088	3410	0.2389	TRUE	reported	igd	2	TRUE	0.00616768	21.1499	61.013
	rs7300606	C	T	C	T	-0.1337	-0.0244618	0.7405	FALSE	FALSE	FALSE	hsCRwl	108325890	0.356288	0.0265179	outcome	TRUE	reported	textfile	8.52393e-06	12	108719667	3410	0.02998	TRUE	reported	igd	2	TRUE	0.00579855	19.8767	61.013
	rs75220521	G	T	G	T	1.34	-0.0430035	0.0023	FALSE	FALSE	FALSE	hsCRwl	80950413	0.548272	0.0716305	outcome	TRUE	reported	textfile	3.67502e-06	6	81660130	3410	0.289	TRUE	reported	igd	2	TRUE	0.00626513	21.4862	61.013
GCST90001470	rs116054627	A	G	A	G	0.3356	-0.00645854	0.0413	FALSE	FALSE	FALSE	K5Agso	50941360	0.857516	0.0359734	outcome	TRUE	reported	textfile	5.38505e-08	2	51168498	3374	0.06158	TRUE	reported	igd	2	TRUE	0.00872596	29.6829	26.6452
	rs11659751	A	T	A	T	0.209	0.0459617	0.0772	FALSE	TRUE	TRUE	K5Agso	58069491	0.197667	0.0356783	outcome	TRUE	reported	textfile	4.70804e-06	18	55736723	3374	0.04558	TRUE	reported	igd	2	FALSE	0.006193	21.0129	26.6452
	rs116894787	C	G	C	G	0.5376	0.199736	0.0111	FALSE	TRUE	TRUE	K5Agso	12198107	0.649207	0.43911	outcome	TRUE	reported	textfile	3.18801e-06	10	12240106	3374	0.1152	TRUE	reported	igd	2	FALSE	0.00641319	21.7649	26.6452
	rs118054784	A	G	A	G	0.2985	0.0893724	0.0422	FALSE	FALSE	FALSE	K5Agso	129646438	0.260995	0.0795098	outcome	TRUE	reported	textfile	1.59698e-06	8	130658684	3374	0.0621	TRUE	reported	igd	2	TRUE	0.00680137	23.0913	26.6452
	rs12061996	G	A	G	A	-0.1861	-0.0467689	0.0947	FALSE	FALSE	FALSE	K5Agso	167845147	0.46632	0.0642007	outcome	TRUE	reported	textfile	6.88906e-06	1	167814385	3374	0.04131	TRUE	reported	igd	2	TRUE	0.00597906	20.2827	26.6452
	rs13201703	A	C	A	C	0.252	-0.0255084	0.0508	FALSE	FALSE	FALSE	K5Agso	22921242	0.643773	0.0551617	outcome	TRUE	reported	textfile	7.45006e-06	6	22921471	3374	0.05616	TRUE	reported	igd	2	TRUE	0.00593223	20.1228	26.6452
	rs1391986	T	G	T	G	0.7317	0.0533311	0.0061	FALSE	FALSE	FALSE	K5Agso	52775477	0.508949	0.0807466	outcome	TRUE	reported	textfile	2.87402e-06	5	52071311	3374	0.1561	TRUE	reported	igd	2	TRUE	0.00646988	21.9585	26.6452
	rs1472757	C	T	C	T	-0.1252	-0.0082032	0.6057	FALSE	FALSE	FALSE	K5Agso	6455759	0.735589	0.0242914	outcome	TRUE	reported	textfile	5.45306e-07	5	6455872	3374	0.02495	TRUE	reported	igd	2	TRUE	0.00740787	25.1658	26.6452
	rs150918748	T	C	T	C	0.8677	-0.130583	0.004	FALSE	FALSE	FALSE	K5Agso	43050384	0.539887	0.213029	outcome	TRUE	reported	textfile	5.63197e-06	22	43446390	3374	0.1908	TRUE	reported	igd	2	TRUE	0.00609233	20.6693	26.6452
	rs16957038	A	G	A	G	1.17	-0.0204916	0.0022	FALSE	FALSE	FALSE	K5Agso	99889998	0.753118	0.0651497	outcome	TRUE	reported	textfile	2.15298e-06	13	100542252	3374	0.2465	TRUE	reported	igd	2	TRUE	0.00663289	22.5154	26.6452
	rs170697	A	G	A	G	0.1127	0.0109921	0.507	FALSE	FALSE	FALSE	K5Agso	83390505	0.645853	0.0239203	outcome	TRUE	reported	textfile	3.16403e-06	14	83856849	3374	0.02415	TRUE	reported	igd	2	TRUE	0.00641319	21.7649	26.6452
	rs17224524	C	T	C	T	-0.129	-0.0520965	0.2945	FALSE	FALSE	FALSE	K5Agso	181481419	0.110607	0.0326527	outcome	TRUE	reported	textfile	2.87098e-06	2	182346146	3374	0.02753	TRUE	reported	igd	2	TRUE	0.00646554	21.9437	26.6452
	rs191779135	G	A	G	A	-0.2628	-0.0794657	0.0865	FALSE	FALSE	FALSE	K5Agso	81581203	0.653904	0.177242	outcome	TRUE	reported	textfile	1.376e-09	4	82502357	3374	0.04325	TRUE	reported	igd	2	TRUE	0.0108245	36.8995	26.6452
	rs4462104	C	T	C	T	-0.1397	-0.0530417	0.2011	FALSE	FALSE	FALSE	K5Agso	36510292	0.0944257	0.0317141	outcome	TRUE	reported	textfile	3.764e-06	1	36975893	3374	0.03017	TRUE	reported	igd	2	TRUE	0.0063146	21.4282	26.6452
	rs4928176	A	G	A	G	0.111	-0.000296739	0.525	FALSE	FALSE	FALSE	K5Agso	99253991	0.989979	0.023627	outcome	TRUE	reported	textfile	5.425e-06	3	98972835	3374	0.02436	TRUE	reported	igd	2	TRUE	0.0061162	20.7508	26.6452
	rs56374915	A	G	A	G	-0.1835	0.0102818	0.1119	FALSE	FALSE	FALSE	K5Agso	115446382	0.822882	0.0459337	outcome	TRUE	reported	textfile	2.52802e-06	7	115086436	3374	0.03892	TRUE	reported	igd	2	TRUE	0.0065453	22.2162	26.6452
	rs61936377	C	T	C	T	0.1364	0.00146452	0.2503	FALSE	FALSE	FALSE	K5Agso	63136511	0.961518	0.0303536	outcome	TRUE	reported	textfile	1.39601e-06	12	63530291	3374	0.02822	TRUE	reported	igd	2	TRUE	0.00687659	23.3484	26.6452
	rs6535445	C	T	C	T	-0.2794	0.00170695	0.3435	FALSE	FALSE	FALSE	K5Agso	83230274	0.949522	0.0269631	outcome	TRUE	reported	textfile	5.62471e-28	4	84151427	3374	0.02525	TRUE	reported	igd	2	TRUE	0.035019	122.369	26.6452
	rs7114664	C	T	C	T	0.1874	0.0352872	0.1046	FALSE	FALSE	FALSE	K5Agso	22771455	0.195018	0.0272304	outcome	TRUE	reported	textfile	2.44101e-06	11	22793001	3374	0.0397	TRUE	reported	igd	2	TRUE	0.00656076	22.269	26.6452
	rs72716416	T	C	T	C	0.3081	0.022036	0.0325	FALSE	FALSE	FALSE	K5Agso	130980984	0.554724	0.0373051	outcome	TRUE	reported	textfile	8.87503e-06	8	131993230	3374	0.06925	TRUE	reported	igd	2	TRUE	0.00583255	19.7827	26.6452
	rs75472065	C	A	C	A	0.6561	-0.276241	0.007	FALSE	FALSE	FALSE	K5Agso	77027522	0.0877688	0.161801	outcome	TRUE	reported	textfile	7.89696e-06	3	77076673	3374	0.1466	TRUE	reported	igd	2	TRUE	0.00590142	20.0177	26.6452
	rs9403901	A	G	A	G	-0.1501	-0.00618463	0.1635	FALSE	FALSE	FALSE	K5Agso	147964997	0.871052	0.0381009	outcome	TRUE	reported	textfile	5.98205e-06	6	148286133	3374	0.03311	TRUE	reported	igd	2	TRUE	0.00605425	20.5393	26.6452
	rs9502274	T	A	T	A	-0.1362	-0.0511659	0.2024	FALSE	TRUE	TRUE	K5Agso	566060	0.0915377	0.0303235	outcome	TRUE	reported	textfile	8.36604e-06	6	566060	3374	0.03052	TRUE	reported	igd	2	FALSE	0.00586792	19.9034	26.6452
	rs9900969	T	G	T	G	0.1321	0.0292699	0.2107	FALSE	FALSE	FALSE	K5Agso	78198408	0.347375	0.0311483	outcome	TRUE	reported	textfile	8.00903e-06	17	76194489	3374	0.02954	TRUE	reported	igd	2	TRUE	0.00589214	19.9861	26.6452
GCST90001471	rs11000032	A	G	A	G	0.1292	0.00866829	0.2843	FALSE	FALSE	FALSE	sBGELS	71859844	0.75499	0.0277769	outcome	TRUE	reported	textfile	3.12802e-06	10	73619601	3410	0.02767	TRUE	reported	igd	2	TRUE	0.00635308	21.7897	32.5847
	rs116054627	A	G	A	G	0.2959	-0.00645854	0.0411	FALSE	FALSE	FALSE	sBGELS	50941360	0.857516	0.0359734	outcome	TRUE	reported	textfile	2.73602e-06	2	51168498	3410	0.063	TRUE	reported	igd	2	TRUE	0.00642768	22.0472	32.5847
	rs146839224	A	G	A	G	1.182	0.0381849	0.0025	FALSE	FALSE	FALSE	sBGELS	129569100	0.450552	0.0506099	outcome	TRUE	reported	textfile	1.41899e-06	10	131367364	3410	0.2447	TRUE	reported	igd	2	TRUE	0.00679596	23.3191	32.5847
	rs148594241	C	T	C	T	-0.3282	-0.0352059	0.0324	FALSE	FALSE	FALSE	sBGELS	235800980	0.839983	0.17436	outcome	TRUE	reported	textfile	6.11097e-06	2	236709624	3410	0.07246	TRUE	reported	igd	2	TRUE	0.00598027	20.5034	32.5847
	rs148863428	A	G	A	G	1.06	0.0471733	0.0029	FALSE	FALSE	FALSE	sBGELS	106633320	0.579267	0.0850803	outcome	TRUE	reported	textfile	5.07002e-06	4	107554477	3410	0.232	TRUE	reported	igd	2	TRUE	0.00608458	20.8632	32.5847
	rs182833362	A	G	A	G	1.949	0.136275	0.0009	FALSE	FALSE	FALSE	sBGELS	27961004	0.339553	0.14269	outcome	TRUE	reported	textfile	1.86299e-06	16	27972325	3410	0.408	TRUE	reported	igd	2	TRUE	0.00664741	22.806	32.5847
	rs1835019	T	C	T	C	0.1261	0.0122793	0.7415	FALSE	FALSE	FALSE	sBGELS	67288001	0.625567	0.0251638	outcome	TRUE	reported	textfile	6.43799e-06	5	66583829	3410	0.02791	TRUE	reported	igd	2	TRUE	0.00595065	20.4012	32.5847
	rs191779135	G	A	G	A	-0.2664	-0.0794657	0.0867	FALSE	FALSE	FALSE	sBGELS	81581203	0.653904	0.177242	outcome	TRUE	reported	textfile	1.721e-09	4	82502357	3410	0.04411	TRUE	reported	igd	2	TRUE	0.0105833	36.4535	32.5847
	rs3827963	G	A	G	A	0.1206	0.0407673	0.3408	FALSE	FALSE	FALSE	sBGELS	20391100	0.113723	0.0257747	outcome	TRUE	reported	textfile	4.61902e-06	20	20371744	3410	0.02628	TRUE	reported	igd	2	TRUE	0.00613784	21.0469	32.5847
	rs4462104	C	T	C	T	-0.1401	-0.0530417	0.2009	FALSE	FALSE	FALSE	sBGELS	36510292	0.0944257	0.0317141	outcome	TRUE	reported	textfile	5.46097e-06	1	36975893	3410	0.03077	TRUE	reported	igd	2	TRUE	0.00604275	20.7189	32.5847
	rs55971447	T	C	T	C	-0.3011	-0.0378283	0.2352	FALSE	FALSE	FALSE	sBGELS	161545536	0.327071	0.0385991	outcome	TRUE	reported	textfile	6.69885e-25	1	161515326	3410	0.02899	TRUE	reported	igd	2	TRUE	0.0306651	107.813	32.5847
	rs56374915	A	G	A	G	-0.1787	0.0102818	0.1116	FALSE	FALSE	FALSE	sBGELS	115446382	0.822882	0.0459337	outcome	TRUE	reported	textfile	6.77407e-06	7	115086436	3410	0.03964	TRUE	reported	igd	2	TRUE	0.00592443	20.3108	32.5847
	rs61859443	A	G	A	G	0.7951	0.0708104	0.005	FALSE	FALSE	FALSE	sBGELS	43297535	0.296662	0.0678508	outcome	TRUE	reported	textfile	8.28591e-06	10	43792983	3410	0.1781	TRUE	reported	igd	2	TRUE	0.00581073	19.9187	32.5847
	rs62297340	A	C	A	C	0.1816	-0.0195879	0.1132	FALSE	FALSE	FALSE	sBGELS	5405662	0.505562	0.0294216	outcome	TRUE	reported	textfile	3.30803e-06	4	5407389	3410	0.03899	TRUE	reported	igd	2	TRUE	0.00632145	21.6806	32.5847
	rs62495198	T	A	T	A	-0.1115	0.00601214	0.4751	FALSE	TRUE	TRUE	sBGELS	13847876	0.800406	0.0237802	outcome	TRUE	reported	textfile	9.15208e-06	8	13705385	3410	0.0251	TRUE	reported	igd	2	FALSE	0.00575363	19.7218	32.5847
	rs6535445	C	T	C	T	-0.3029	0.00170695	0.344	FALSE	FALSE	FALSE	sBGELS	83230274	0.949522	0.0269631	outcome	TRUE	reported	textfile	1.34803e-31	4	84151427	3410	0.02564	TRUE	reported	igd	2	TRUE	0.0393177	139.479	32.5847
	rs75472065	C	A	C	A	0.6724	-0.276241	0.0072	FALSE	FALSE	FALSE	sBGELS	77027522	0.0877688	0.161801	outcome	TRUE	reported	textfile	5.61694e-06	3	77076673	3410	0.1479	TRUE	reported	igd	2	TRUE	0.00602477	20.6569	32.5847
	rs79976443	A	G	A	G	-0.2638	0.0347147	0.0462	FALSE	FALSE	FALSE	sBGELS	78665304	0.769568	0.118505	outcome	TRUE	reported	textfile	7.96893e-06	3	78714454	3410	0.05899	TRUE	reported	igd	2	TRUE	0.00583041	19.9866	32.5847
	rs8044705	C	T	C	T	0.1095	-0.00208786	0.4141	FALSE	FALSE	FALSE	sBGELS	48881080	0.929864	0.0237212	outcome	TRUE	reported	textfile	9.80099e-06	16	48914991	3410	0.02473	TRUE	reported	igd	2	TRUE	0.00571657	19.5941	32.5847
GCST90001472	rs10779896	T	A	T	A	-0.2434	-0.0214023	0.0633	FALSE	TRUE	TRUE	85YJTv	4565460	0.512763	0.0326981	outcome	TRUE	reported	textfile	5.33605e-06	2	4613050	3387	0.0534	TRUE	reported	igd	2	FALSE	0.0060966	20.7636	85.3219
	rs113995133	A	G	A	G	-0.6066	0.0685658	0.0103	FALSE	FALSE	FALSE	85YJTv	163515407	0.661582	0.15664	outcome	TRUE	reported	textfile	2.381e-06	1	163485197	3387	0.1283	TRUE	reported	igd	2	TRUE	0.00655661	22.3406	85.3219
	rs117044176	A	G	A	G	-1.385	-0.0871414	0.0016	FALSE	FALSE	FALSE	85YJTv	11564417	0.43358	0.11128	outcome	TRUE	reported	textfile	8.27409e-06	7	11604044	3387	0.3101	TRUE	reported	igd	2	TRUE	0.00585505	19.9361	85.3219
	rs117690664	A	C	A	C	-2.339	-0.12914	0.0007	FALSE	FALSE	FALSE	85YJTv	106681486	0.255789	0.113639	outcome	TRUE	reported	textfile	4.80596e-06	8	107693714	3387	0.5107	TRUE	reported	igd	2	TRUE	0.00615506	20.9639	85.3219
	rs11830537	T	C	T	C	-0.3134	-0.0336741	0.0371	FALSE	FALSE	FALSE	85YJTv	47763920	0.418623	0.041634	outcome	TRUE	reported	textfile	7.35495e-06	12	48157703	3387	0.06979	TRUE	reported	igd	2	TRUE	0.00591859	20.1537	85.3219
	rs135299	A	G	A	G	0.1435	0.0330139	0.2166	FALSE	FALSE	FALSE	85YJTv	48083914	0.342366	0.0347697	outcome	TRUE	reported	textfile	4.46396e-06	22	48479731	3387	0.03123	TRUE	reported	igd	2	TRUE	0.00619506	21.101	85.3219
	rs139956891	G	A	G	A	0.2686	-0.0213559	0.0616	FALSE	FALSE	FALSE	85YJTv	125867593	0.711256	0.0576922	outcome	TRUE	reported	textfile	8.74601e-07	10	127556162	3387	0.05451	TRUE	reported	igd	2	TRUE	0.00711774	24.2663	85.3219
	rs143140559	T	C	T	C	0.7645	-0.193998	0.0094	FALSE	FALSE	FALSE	85YJTv	161002465	0.368863	0.215887	outcome	TRUE	reported	textfile	4.219e-09	1	160972255	3387	0.1298	TRUE	reported	igd	2	TRUE	0.0101383	34.6696	85.3219
	rs144101090	A	T	A	T	-0.4201	0.0696665	0.0186	FALSE	TRUE	TRUE	85YJTv	59580629	0.451018	0.0924302	outcome	TRUE	reported	textfile	9.12095e-06	4	60446347	3387	0.09454	TRUE	reported	igd	2	FALSE	0.00579608	19.7341	85.3219
	rs146507670	T	C	T	C	-0.4935	0.00565902	0.0136	FALSE	FALSE	FALSE	85YJTv	172383941	0.960996	0.115717	outcome	TRUE	reported	textfile	6.80503e-06	3	172101731	3387	0.1095	TRUE	reported	igd	2	TRUE	0.00596121	20.2997	85.3219
	rs147678401	A	G	A	G	0.3417	-0.0339061	0.0437	FALSE	FALSE	FALSE	85YJTv	161065990	0.535693	0.0547458	outcome	TRUE	reported	textfile	1.09901e-07	1	161035780	3387	0.06421	TRUE	reported	igd	2	TRUE	0.00829189	28.3027	85.3219
	rs162588	A	G	A	G	-0.1544	-0.0330417	0.2046	FALSE	FALSE	FALSE	85YJTv	322415	0.301839	0.0320018	outcome	TRUE	reported	textfile	1.06101e-06	3	364098	3387	0.03158	TRUE	reported	igd	2	TRUE	0.00700811	23.8899	85.3219
	rs2788088	A	G	A	G	-0.1286	0.0478471	0.6884	FALSE	FALSE	FALSE	85YJTv	2980529	0.0594703	0.0253871	outcome	TRUE	reported	textfile	2.711e-06	1	2897093	3387	0.02736	TRUE	reported	igd	2	TRUE	0.00648054	22.0797	85.3219
	rs61808511	G	T	G	T	0.1553	-0.0336512	0.1676	FALSE	FALSE	FALSE	85YJTv	119573965	0.253737	0.0294844	outcome	TRUE	reported	textfile	8.03304e-06	1	120116588	3387	0.03474	TRUE	reported	igd	2	TRUE	0.00586561	19.9722	85.3219
	rs62489014	T	C	T	C	-0.4885	-0.077779	0.0133	FALSE	FALSE	FALSE	85YJTv	1194980	0.557025	0.132443	outcome	TRUE	reported	textfile	9.18904e-06	8	1144980	3387	0.11	TRUE	reported	igd	2	TRUE	0.00578905	19.71	85.3219
	rs6656063	T	C	T	C	0.1319	-0.0352519	0.2499	FALSE	FALSE	FALSE	85YJTv	157995066	0.147451	0.0243352	outcome	TRUE	reported	textfile	8.53709e-06	1	157964856	3387	0.02958	TRUE	reported	igd	2	TRUE	0.00583628	19.8718	85.3219
	rs71632979	G	A	G	A	0.9207	-0.0404557	0.2449	FALSE	FALSE	FALSE	85YJTv	161556607	0.290303	0.0382575	outcome	TRUE	reported	textfile	1e-200	1	161526397	3387	0.02691	TRUE	reported	igd	2	TRUE	0.256846	1169.91	85.3219
	rs71639910	A	G	A	G	0.425	0.0117126	0.0686	FALSE	FALSE	FALSE	85YJTv	161967984	0.86793	0.0704357	outcome	TRUE	reported	textfile	3.95913e-16	1	161937774	3387	0.05195	TRUE	reported	igd	2	TRUE	0.0193773	66.8883	85.3219
	rs77107932	C	A	C	A	-0.4223	0.0104768	0.0279	FALSE	FALSE	FALSE	85YJTv	162072370	0.894228	0.0787991	outcome	TRUE	reported	textfile	3.13098e-07	1	162042160	3387	0.08238	TRUE	reported	igd	2	TRUE	0.00769887	26.2629	85.3219
GCST90001473	rs10779896	T	A	T	A	-0.2429	-0.0214023	0.0632	FALSE	TRUE	TRUE	50rxdB	4565460	0.512763	0.0326981	outcome	TRUE	reported	textfile	5.00299e-06	2	4613050	3410	0.05312	TRUE	reported	igd	2	FALSE	0.00609438	20.897	90.555
	rs113704374	G	C	G	C	0.4006	0.00775415	0.0218	FALSE	TRUE	TRUE	50rxdB	106425109	0.962246	0.163813	outcome	TRUE	reported	textfile	9.03296e-06	12	106818887	3410	0.0901	TRUE	reported	igd	2	FALSE	0.00576378	19.7568	90.555
	rs113995133	A	G	A	G	-0.6516	0.0685658	0.0103	FALSE	FALSE	FALSE	50rxdB	163515407	0.661582	0.15664	outcome	TRUE	reported	textfile	3.53997e-07	1	163485197	3410	0.1277	TRUE	reported	igd	2	TRUE	0.00757744	26.0211	90.555
	rs117690664	A	C	A	C	-2.506	-0.12914	0.0007	FALSE	FALSE	FALSE	50rxdB	106681486	0.255789	0.113639	outcome	TRUE	reported	textfile	7.49394e-07	8	107693714	3410	0.5056	TRUE	reported	igd	2	TRUE	0.0071528	24.5524	90.555
	rs139956891	G	A	G	A	0.244	-0.0213559	0.0616	FALSE	FALSE	FALSE	50rxdB	125867593	0.711256	0.0576922	outcome	TRUE	reported	textfile	6.663e-06	10	127556162	3410	0.0541	TRUE	reported	igd	2	TRUE	0.00592991	20.3297	90.555
	rs143140559	T	C	T	C	0.71	-0.193998	0.0094	FALSE	FALSE	FALSE	50rxdB	161002465	0.368863	0.215887	outcome	TRUE	reported	textfile	3.879e-08	1	160972255	3410	0.1289	TRUE	reported	igd	2	TRUE	0.0088188	30.3219	90.555
	rs144030104	T	C	T	C	0.5823	0.00043124	0.0101	FALSE	FALSE	FALSE	50rxdB	40983935	0.996322	0.0935558	outcome	TRUE	reported	textfile	7.55892e-06	8	40841454	3410	0.1299	TRUE	reported	igd	2	TRUE	0.00585827	20.0826	90.555
	rs147678401	A	G	A	G	0.3215	-0.0339061	0.0437	FALSE	FALSE	FALSE	50rxdB	161065990	0.535693	0.0547458	outcome	TRUE	reported	textfile	4.97496e-07	1	161035780	3410	0.06383	TRUE	reported	igd	2	TRUE	0.0073848	25.3546	90.555
	rs162588	A	G	A	G	-0.1411	-0.0330417	0.2048	FALSE	FALSE	FALSE	50rxdB	322415	0.301839	0.0320018	outcome	TRUE	reported	textfile	7.09594e-06	3	364098	3410	0.03136	TRUE	reported	igd	2	TRUE	0.0059017	20.2324	90.555
	rs2788088	A	G	A	G	-0.1283	0.0478471	0.6886	FALSE	FALSE	FALSE	50rxdB	2980529	0.0594703	0.0253871	outcome	TRUE	reported	textfile	2.488e-06	1	2897093	3410	0.02719	TRUE	reported	igd	2	TRUE	0.00648715	22.2526	90.555
	rs4761369	T	C	T	C	0.1553	0.0517942	0.1861	FALSE	FALSE	FALSE	50rxdB	77349719	0.0770531	0.0292946	outcome	TRUE	reported	textfile	3.19198e-06	12	77743499	3410	0.03329	TRUE	reported	igd	2	TRUE	0.00634159	21.7501	90.555
	rs500809	A	G	A	G	0.1195	0.00170077	0.5667	FALSE	FALSE	FALSE	50rxdB	3032490	0.944782	0.0245559	outcome	TRUE	reported	textfile	4.37603e-06	20	3013136	3410	0.02597	TRUE	reported	igd	2	TRUE	0.00617091	21.161	90.555
	rs5767014	C	T	C	T	-0.1396	-0.0247805	0.7776	FALSE	FALSE	FALSE	50rxdB	48078471	0.465935	0.0339873	outcome	TRUE	reported	textfile	5.18096e-06	22	48474288	3410	0.03059	TRUE	reported	igd	2	TRUE	0.00607034	20.8141	90.555
	rs6537835	A	G	A	G	-0.1706	0.0499299	0.8488	FALSE	FALSE	FALSE	50rxdB	114566293	0.114977	0.0316771	outcome	TRUE	reported	textfile	4.48002e-06	1	115108914	3410	0.03712	TRUE	reported	igd	2	TRUE	0.0061561	21.11	90.555
	rs71632979	G	A	G	A	0.929	-0.0404557	0.2447	FALSE	FALSE	FALSE	50rxdB	161556607	0.290303	0.0382575	outcome	TRUE	reported	textfile	1e-200	1	161526397	3410	0.0268	TRUE	reported	igd	2	TRUE	0.260561	1200.9	90.555
	rs71639910	A	G	A	G	0.4245	0.0117126	0.0688	FALSE	FALSE	FALSE	50rxdB	161967984	0.86793	0.0704357	outcome	TRUE	reported	textfile	3.15864e-16	1	161937774	3410	0.05172	TRUE	reported	igd	2	TRUE	0.0193726	67.3261	90.555
	rs72659736	T	G	T	G	0.1382	-0.0213966	0.2557	FALSE	FALSE	FALSE	50rxdB	59868364	0.428726	0.0270373	outcome	TRUE	reported	textfile	6.85394e-06	8	60780923	3410	0.03068	TRUE	reported	igd	2	TRUE	0.00591527	20.2792	90.555
	rs77107932	C	A	C	A	-0.4247	0.0104768	0.028	FALSE	FALSE	FALSE	50rxdB	162072370	0.894228	0.0787991	outcome	TRUE	reported	textfile	2.30802e-07	1	162042160	3410	0.08194	TRUE	reported	igd	2	TRUE	0.00781646	26.8484	90.555
GCST90001474	rs10735429	G	A	G	A	0.1338	-0.0198167	0.7411	FALSE	FALSE	FALSE	nMn1MV	108332900	0.452796	0.0263955	outcome	TRUE	reported	textfile	4.91802e-06	12	108726677	3410	0.02924	TRUE	reported	igd	2	TRUE	0.00610302	20.9268	40.1627
	rs10759202	A	G	A	G	-0.2618	0.0145533	0.0477	FALSE	FALSE	FALSE	nMn1MV	96700343	0.642771	0.0313765	outcome	TRUE	reported	textfile	9.85099e-06	9	99462625	3410	0.05913	TRUE	reported	igd	2	TRUE	0.00571583	19.5915	40.1627
	rs10910893	T	G	T	G	-0.2262	-0.0330403	0.0707	FALSE	FALSE	FALSE	nMn1MV	181191819	0.238764	0.0280458	outcome	TRUE	reported	textfile	3.85798e-06	1	181160955	3410	0.04889	TRUE	reported	igd	2	TRUE	0.0062384	21.3939	40.1627
	rs11715127	C	G	C	G	0.1657	-0.0239945	0.1276	FALSE	TRUE	TRUE	nMn1MV	342486	0.633108	0.0502655	outcome	TRUE	reported	textfile	4.48198e-06	3	384169	3410	0.03607	TRUE	reported	igd	2	FALSE	0.00615062	21.091	40.1627
	rs12951038	T	C	T	C	0.2104	-0.0695279	0.0745	FALSE	FALSE	FALSE	nMn1MV	79548466	0.197912	0.0540013	outcome	TRUE	reported	textfile	7.24303e-06	17	77544550	3410	0.04683	TRUE	reported	igd	2	TRUE	0.00588472	20.1738	40.1627
	rs143032729	G	A	G	A	-0.3966	-0.10504	0.0326	FALSE	FALSE	FALSE	nMn1MV	160383999	0.112413	0.0661697	outcome	TRUE	reported	textfile	5.11105e-08	1	160353789	3410	0.07264	TRUE	reported	igd	2	TRUE	0.00866601	29.792	40.1627
	rs196051	G	A	G	A	-0.1221	0.0111381	0.3971	FALSE	FALSE	FALSE	nMn1MV	22055902	0.644172	0.024115	outcome	TRUE	reported	textfile	2.90503e-06	6	22056131	3410	0.02607	TRUE	reported	igd	2	TRUE	0.00639161	21.9227	40.1627
	rs203393	A	G	A	G	-0.1217	0.0104644	0.5792	FALSE	FALSE	FALSE	nMn1MV	57667507	0.660379	0.0238156	outcome	TRUE	reported	textfile	1.23501e-06	20	56242563	3410	0.02505	TRUE	reported	igd	2	TRUE	0.0068741	23.5891	40.1627
	rs2164210	C	T	C	T	0.1236	-0.0142213	0.3238	FALSE	FALSE	FALSE	nMn1MV	135822717	0.584226	0.0259881	outcome	TRUE	reported	textfile	8.76193e-06	2	136580287	3410	0.02777	TRUE	reported	igd	2	TRUE	0.00577584	19.7984	40.1627
	rs28595889	T	A	T	A	0.1222	0.0221101	0.677	FALSE	TRUE	TRUE	nMn1MV	61304767	0.370272	0.0246775	outcome	TRUE	reported	textfile	8.31802e-06	12	61698548	3410	0.02739	TRUE	reported	igd	2	FALSE	0.00580332	19.8931	40.1627
	rs4398989	A	G	A	G	-0.2853	0.0467731	0.0422	FALSE	FALSE	FALSE	nMn1MV	107476320	0.42698	0.0588808	outcome	TRUE	reported	textfile	4.65897e-06	9	110238601	3410	0.06219	TRUE	reported	igd	2	TRUE	0.00613389	21.0333	40.1627
	rs4752481	T	G	T	G	-0.1258	-0.0133181	0.4535	FALSE	FALSE	FALSE	nMn1MV	120941016	0.571858	0.0235587	outcome	TRUE	reported	textfile	6.93107e-07	10	122700529	3410	0.0253	TRUE	reported	igd	2	TRUE	0.00719827	24.7096	40.1627
	rs56199187	T	C	T	C	-0.5887	-0.0449578	0.2441	FALSE	FALSE	FALSE	nMn1MV	161551141	0.242274	0.0384478	outcome	TRUE	reported	textfile	1.96517e-92	1	161520931	3410	0.02799	TRUE	reported	igd	2	TRUE	0.11483	442.107	40.1627
	rs607867	C	G	C	G	-0.868	-0.00324152	0.0048	FALSE	TRUE	TRUE	nMn1MV	107671625	0.958194	0.061838	outcome	TRUE	reported	textfile	5.31496e-06	11	107542351	3410	0.1904	TRUE	reported	igd	2	FALSE	0.00605776	20.7707	40.1627
	rs62234997	G	A	G	A	0.2108	0.00263985	0.085	FALSE	FALSE	FALSE	nMn1MV	20713127	0.919855	0.0262368	outcome	TRUE	reported	textfile	3.77703e-06	3	20754619	3410	0.04552	TRUE	reported	igd	2	TRUE	0.00624971	21.4329	40.1627
	rs62272723	T	G	T	G	-0.2775	-0.0191027	0.0501	FALSE	FALSE	FALSE	nMn1MV	152245371	0.7683	0.0648431	outcome	TRUE	reported	textfile	2.21202e-06	3	151963160	3410	0.05854	TRUE	reported	igd	2	TRUE	0.00654657	22.4577	40.1627
	rs690924	T	C	T	C	0.3577	0.0200589	0.0264	FALSE	FALSE	FALSE	nMn1MV	49775051	0.69349	0.0508949	outcome	TRUE	reported	textfile	6.77798e-06	15	50067248	3410	0.07936	TRUE	reported	igd	2	TRUE	0.00592244	20.3039	40.1627
	rs73180904	T	C	T	C	-0.2075	-0.0185756	0.0842	FALSE	FALSE	FALSE	nMn1MV	44191186	0.764281	0.0619467	outcome	TRUE	reported	textfile	5.99501e-06	13	44765322	3410	0.04577	TRUE	reported	igd	2	TRUE	0.00599115	20.5409	40.1627
	rs7566	C	T	C	T	0.184	0.080136	0.9029	FALSE	FALSE	FALSE	nMn1MV	179729448	0.0230643	0.0352655	outcome	TRUE	reported	textfile	9.99701e-06	5	179156449	3410	0.04158	TRUE	reported	igd	2	TRUE	0.00570986	19.5709	40.1627
	rs75812106	T	C	T	C	0.679	-0.0775212	0.007	FALSE	FALSE	FALSE	nMn1MV	108639138	0.30436	0.0754737	outcome	TRUE	reported	textfile	7.04596e-06	11	108509865	3410	0.1509	TRUE	reported	igd	2	TRUE	0.0059025	20.2351	40.1627
	rs7593638	C	A	C	A	0.1305	0.0589763	0.4749	FALSE	FALSE	FALSE	nMn1MV	111119364	0.0120218	0.0234825	outcome	TRUE	reported	textfile	2.52e-07	2	111876941	3410	0.02526	TRUE	reported	igd	2	TRUE	0.0077663	26.6747	40.1627
	rs78726632	C	G	C	G	0.6212	-0.177491	0.0097	FALSE	TRUE	TRUE	nMn1MV	14156098	0.267189	0.159965	outcome	TRUE	reported	textfile	1.14101e-06	7	14195723	3410	0.1274	TRUE	reported	igd	2	FALSE	0.00692392	23.7612	40.1627
	rs79053113	T	C	T	C	-1.939	0.043384	0.0009	FALSE	FALSE	FALSE	nMn1MV	131543008	0.634385	0.0912267	outcome	TRUE	reported	textfile	3.264e-06	10	133341271	3410	0.4161	TRUE	reported	igd	2	TRUE	0.00632775	21.7023	40.1627
	rs876036	C	T	C	T	-0.1835	-0.030786	0.2645	FALSE	FALSE	FALSE	nMn1MV	50268114	0.227236	0.0254955	outcome	TRUE	reported	textfile	2.25201e-10	7	50307710	3410	0.02885	TRUE	reported	igd	2	TRUE	0.0117248	40.432	40.1627
GCST90001475	rs10410907	T	C	T	C	0.1843	0.0968463	0.1067	FALSE	FALSE	FALSE	Awhe8L	40527202	0.00897222	0.0370617	outcome	TRUE	reported	textfile	5.65405e-06	19	41033109	3595	0.04055	TRUE	reported	igd	2	TRUE	0.00571323	20.6456	29.1417
	rs116322630	T	C	T	C	0.2678	-0.045428	0.0633	FALSE	FALSE	FALSE	Awhe8L	15220897	0.282692	0.0422865	outcome	TRUE	reported	textfile	6.63804e-07	6	15221128	3595	0.05377	TRUE	reported	igd	2	TRUE	0.00685261	24.7913	29.1417
	rs116670542	A	G	A	G	-1.812	-0.270143	0.0008	FALSE	FALSE	FALSE	Awhe8L	217012713	0.0225533	0.118436	outcome	TRUE	reported	textfile	3.84601e-06	2	217877436	3595	0.3917	TRUE	reported	igd	2	TRUE	0.00591743	21.3879	29.1417
	rs12436392	C	T	C	T	0.5761	-0.0582232	0.9897	FALSE	FALSE	FALSE	Awhe8L	80826757	0.347595	0.061988	outcome	TRUE	reported	textfile	2.943e-06	14	81293101	3595	0.123	TRUE	reported	igd	2	TRUE	0.00606519	21.9252	29.1417
	rs150066324	T	A	T	A	0.5024	-0.0985456	0.0129	FALSE	TRUE	TRUE	Awhe8L	51554019	0.665155	0.22769	outcome	TRUE	reported	textfile	9.25699e-06	12	51947803	3595	0.1131	TRUE	reported	igd	2	FALSE	0.00545881	19.7212	29.1417
	rs17023874	T	C	T	C	-0.2782	0.0475391	0.0421	FALSE	FALSE	FALSE	Awhe8L	39506882	0.443049	0.0619762	outcome	TRUE	reported	textfile	7.74694e-06	2	39734023	3595	0.06213	TRUE	reported	igd	2	TRUE	0.00554622	20.0387	29.1417
	rs187260865	T	C	T	C	-0.5052	0.383289	0.0185	FALSE	FALSE	FALSE	Awhe8L	106324114	0.153495	0.268542	outcome	TRUE	reported	textfile	8.30902e-08	2	106940570	3595	0.09405	TRUE	reported	igd	2	TRUE	0.0079623	28.8382	29.1417
	rs2090888	T	A	T	A	0.1173	-0.0346481	0.6394	FALSE	TRUE	TRUE	Awhe8L	109325013	0.161434	0.024744	outcome	TRUE	reported	textfile	9.67208e-06	6	109646216	3595	0.02647	TRUE	reported	igd	2	FALSE	0.0054328	19.6267	29.1417
	rs2113347	C	G	C	G	-0.1283	-0.00498227	0.2826	FALSE	TRUE	TRUE	Awhe8L	3318351	0.835178	0.0239457	outcome	TRUE	reported	textfile	4.20397e-06	8	3175873	3595	0.02784	TRUE	reported	igd	2	FALSE	0.00587297	21.2262	29.1417
	rs2878953	T	C	T	C	0.2039	0.000432752	0.0771	FALSE	FALSE	FALSE	Awhe8L	180393087	0.993859	0.0562235	outcome	TRUE	reported	textfile	9.82992e-06	3	180110875	3595	0.04605	TRUE	reported	igd	2	TRUE	0.00542393	19.5945	29.1417
	rs6010756	C	A	C	A	-0.3757	0.050271	0.0243	FALSE	FALSE	FALSE	Awhe8L	62634045	0.470531	0.0696645	outcome	TRUE	reported	textfile	2.67202e-06	20	61265397	3595	0.07989	TRUE	reported	igd	2	TRUE	0.00611414	22.1032	29.1417
	rs61835728	T	C	T	C	-0.5588	0.0401185	0.0103	FALSE	FALSE	FALSE	Awhe8L	10508302	0.391391	0.0468074	outcome	TRUE	reported	textfile	8.39093e-06	10	10550265	3595	0.1253	TRUE	reported	igd	2	TRUE	0.00550194	19.8778	29.1417
[truncated: 16,042 more rows]

## Sheet: S2.2
The IVs SNPs involved in immune cells phenotypes to AAA of UK Biobank database.
[truncated: 15,741 more rows]

[truncated: 2 more sheets: S2.3, S2.4]
