# Supplementary material
Source: Frontiers journal article supplement (https://www.frontiersin.org/articles/1413183)
Supplement: Table_3.xlsx [file Table_3.xlsx]

## Sheet: Content
Content
S3.1. The resluts of forward univariable MR analysis between immune factors phenotypes and the risk of AAA in FinnGen database.
S3.2. The resluts of forward univariable MR analysis between immune factors phenotypes and the risk of AAA in UK Bio-Bank database.

## Sheet: S3.1
The resluts of forward univariable MR analysis between immune factors phenotypes and the risk of AAA in FinnGen database.
id	nsnp	MR-Egger			Weighted median			Inverse variance weighted			Simple mode			Weighted mode			MR-Egger intercept		MR-PRESSO global	MR-IVW			MR-Egeer
		p_value	OR	95% OR	p_value	OR	95% OR	p_value	OR	95% OR	p_value	OR	95% OR	p_value	OR	95% OR	egger intercept	p_value	p_value	Q	Q_df	Q_pval	Q	Q_df	Q_pval
GCST90274818	32	0.116	0.82782	0.65865-1.0404	0.096	0.84465	0.69243-1.03034	0.004	0.83278	0.73523-0.94326	0.233	0.81326	0.58270-1.13504	0.197	0.84867	0.66481-1.08337	0.00074	0.95171	0.935	20.7013	31	0.91957	20.6976	30	0.89711
GCST90274795	33	0.364	1.1179	0.88209-1.4167	0.367	1.0799	0.91370-1.27633	0.012	1.15695	1.03204-1.29699	0.795	1.04341	0.75902-1.43437	0.818	1.03514	0.77268-1.38674	0.00422	0.74788	0.837	23.763	32	0.85287	23.6578	31	0.82426
GCST90274815	13	0.174	1.58997	0.85024-2.9733	0.063	1.42631	0.98157-2.07258	0.022	1.43771	1.05350-1.96204	0.741	0.90472	0.50652-1.61597	0.835	0.94958	0.59027-1.52763	-0.01346	0.71994	0.006	33.12	12	0.00093	32.7175	11	0.00058
GCST90274820	27	0.179	1.18904	0.93028-1.5198	0.205	1.11439	0.94268-1.31738	0.031	1.15181	1.01276-1.30995	0.605	0.90994	0.63887-1.29603	0.174	1.13313	0.95084-1.35037	-0.00411	0.76634	0.155	35.1536	26	0.10837	35.0271	25	0.08771
GCST90274811	24	0.354	1.17505	0.84152-1.6408	0.021	1.26071	1.03502-1.53561	0.042	1.17245	1.00558-1.36701	0.334	1.18291	0.84755-1.65097	0.046	1.30597	1.01877-1.67414	-0.00028	0.98835	0.158	29.807	23	0.15502	29.8067	22	0.12324
GCST90274765	36	0.312	1.08482	0.92846-1.2675	0.114	1.11981	0.97312-1.28862	0.044	1.10584	1.00259-1.21972	0.699	1.05154	0.81664-1.35400	0.133	1.10618	0.97280-1.25785	0.00311	0.7576	0.982	20.1379	35	0.97905	20.0411	34	0.97251
GCST90274842	35	0.01	0.77221	0.64244-0.9282	0.018	0.81895	0.69378-0.96670	0.046	0.88832	0.79059-0.99813	0.04	0.72581	0.54105-0.97365	0.018	0.79377	0.66206-0.95167	0.02114	0.06826	0.14	42.2154	34	0.15741	38.1119	33	0.24807
GCST90274833	42	0.096	1.2976	0.96162-1.7510	0	1.35556	1.15843-1.58625	0.05	1.16767	0.99998-1.36350	0.124	1.29942	0.93701-1.80202	0.002	1.37865	1.14344-1.66225	-0.01252	0.42407	<0.001	109.041	41	0	107.291	40	0
GCST90274776	28	0.728	0.94417	0.68509-1.3012	0.014	0.78092	0.64079-0.95170	0.059	0.87213	0.75685-1.00497	0.237	0.79559	0.54915-1.15262	0.019	0.75027	0.59810-0.94116	-0.00895	0.59213	0.318	29.6567	27	0.3298	29.3248	26	0.29652
GCST90274825	20	0.181	1.1683	0.93821-1.4548	0.027	1.17153	1.01814-1.34802	0.063	1.13724	0.99312-1.30227	0.338	1.18126	0.84759-1.64628	0.039	1.17292	1.01846-1.35081	-0.00448	0.75932	0.165	27.7172	19	0.08902	27.569	18	0.06892
GCST90274822	520	0.68	1.01253	0.95429-1.0743	0.828	0.99201	0.92280-1.06642	0.089	1.03407	0.99485-1.07484	0.722	0.95755	0.75444-1.21535	0.809	0.99112	0.92183-1.06562	0.00239	0.35839	0.462	522.382	519	0.45009	521.532	518	0.44821
GCST90274814	24	0.541	0.91699	0.69775-1.2051	0.388	0.91391	0.74481-1.12139	0.092	0.8869	0.77143-1.01965	0.463	1.14579	0.80125-1.63850	0.093	0.75789	0.55578-1.03349	-0.00435	0.78339	0.771	18.0589	23	0.75429	17.9814	22	0.70709
GCST90274809	21	0.516	1.13415	0.78148-1.6460	0.254	1.15196	0.90341-1.46889	0.102	1.16247	0.97063-1.39223	0.314	1.24565	0.82103-1.88987	0.564	1.12083	0.76568-1.64072	0.00312	0.88362	0.929	11.278	20	0.93869	11.256	19	0.91493
GCST90274772	23	0.007	1.21549	1.06854-1.3827	0.009	1.1568	1.03695-1.29052	0.105	1.07918	0.98430-1.18321	0.09	0.69583	0.46603-1.03894	0.011	1.15985	1.04428-1.28821	-0.02432	0.01728	0.384	21.1378	22	0.51223	14.4565	21	0.8492
GCST90274824	27	0.884	1.0168	0.81517-1.2683	0.245	0.91311	0.78349-1.06418	0.105	0.91169	0.81525-1.01955	0.33	0.87807	0.67932-1.13496	0.47	0.93187	0.77157-1.12548	-0.01549	0.27342	0.294	29.3411	26	0.2958	27.9396	25	0.31064
GCST90274828	26	0.647	0.93911	0.71987-1.2251	0.195	0.88312	0.73178-1.06575	0.125	0.89644	0.77947-1.03096	0.274	0.81828	0.57569-1.16308	0.304	0.88241	0.69861-1.11457	-0.00599	0.68851	0.204	31.0473	25	0.18746	30.8358	24	0.15857
GCST90274773	29	0.366	1.16322	0.84280-1.6055	0.949	0.99367	0.81723-1.20821	0.129	0.90192	0.78930-1.03061	0.448	1.14235	0.81389-1.60335	0.617	1.09365	0.77342-1.54646	-0.02761	0.10269	0.272	31.5364	28	0.29378	28.522	27	0.38445
GCST90274831	23	0.929	0.98487	0.70779-1.3704	0.021	1.293	1.04010-1.60738	0.13	1.12757	0.96515-1.31732	0.155	1.39313	0.89628-2.16540	0.061	1.37905	1.00242-1.89719	0.01462	0.37268	0.249	25.7154	22	0.2641	24.7379	21	0.25869
GCST90274796	19	0.537	1.08904	0.83549-1.4195	0.733	1.03827	0.83710-1.28777	0.136	1.11775	0.96541-1.29414	0.342	1.189	0.83995-1.68309	0.849	1.02482	0.79909-1.31433	0.00332	0.82006	0.583	16.3319	18	0.5694	16.2785	17	0.50418
GCST90274783	490	0.032	0.91352	0.84106-0.9922	0.192	0.93089	0.83586-1.03673	0.143	0.96604	0.92237-1.01178	0.866	1.02078	0.80378-1.29635	0.227	0.93926	0.84850-1.03973	0.00518	0.1105	0.028	549.221	489	0.03054	546.359	488	0.03442
GCST90274767	30	0.446	0.94485	0.81822-1.0911	0.142	0.90841	0.79915-1.03261	0.156	0.92975	0.84078-1.02813	0.996	0.9992	0.73299-1.36209	0.208	0.91374	0.79645-1.04830	-0.00314	0.76122	0.737	24.8595	29	0.68552	24.7653	28	0.64058
GCST90274768	518	0.007	1.08288	1.02177-1.1476	0.329	1.03718	0.96386-1.11608	0.16	1.02832	0.98905-1.06914	0.466	1.08236	0.87518-1.33859	0.08	1.05632	0.99360-1.12301	-0.00637	0.01954	0.044	575.917	517	0.03693	569.858	516	0.05029
GCST90274800	25	0.659	0.96622	0.83096-1.1235	0.398	0.95181	0.84871-1.06742	0.208	0.94376	0.86238-1.03282	0.309	0.86833	0.66534-1.13325	0.378	0.94824	0.84433-1.06493	-0.0044	0.70354	0.447	25.2019	24	0.39486	25.0402	23	0.34822
GCST90274821	29	0.625	0.95714	0.80458-1.1386	0.827	0.98364	0.84833-1.14053	0.215	0.93815	0.84812-1.03774	0.938	1.01184	0.75561-1.35495	0.958	0.99482	0.82232-1.20352	-0.00323	0.78319	0.535	26.4395	28	0.5489	26.3623	27	0.49857
GCST90274793	30	0.944	0.98811	0.71060-1.3740	0.261	1.12804	0.91443-1.39155	0.236	1.09625	0.94178-1.27606	0.178	1.27545	0.90322-1.80109	0.181	1.2229	0.91703-1.63080	0.01144	0.49235	0.743	24.6375	29	0.69692	24.1535	28	0.67341
GCST90274845	22	0.35	1.2171	0.81399-1.8198	0.183	1.17453	0.92670-1.48863	0.239	1.10852	0.93373-1.31602	0.426	1.18737	0.78460-1.79690	0.481	1.16357	0.76937-1.75975	-0.01181	0.61877	0.27	24.4377	21	0.27234	24.1295	20	0.23678
GCST90274834	19	0.277	0.79823	0.53850-1.1832	0.066	0.80641	0.64099-1.01453	0.248	0.89895	0.75017-1.07723	0.328	0.80679	0.53074-1.22642	0.229	0.79125	0.54715-1.14424	0.01335	0.51244	0.231	22.1589	18	0.22501	21.5903	17	0.20099
GCST90274761	13	0.881	0.95748	0.55039-1.6657	0.401	0.88909	0.67563-1.16999	0.259	0.88542	0.71689-1.09356	0.761	0.93004	0.58885-1.46893	0.664	0.91576	0.62164-1.34906	-0.00772	0.77004	0.834	7.32146	12	0.83566	7.23168	11	0.78002
GCST90274758	18	0.529	0.86875	0.56585-1.3338	0.06	0.80333	0.63948-1.00917	0.261	0.90991	0.77175-1.07280	0.38	0.84401	0.58356-1.22069	0.216	0.81762	0.60136-1.11166	0.00464	0.82159	0.583	14.9691	17	0.59771	14.9165	16	0.53076
GCST90274837	20	0.21	0.74297	0.47467-1.1629	0.274	0.87362	0.68593-1.11266	0.269	0.90538	0.75897-1.08004	0.623	1.12793	0.70381-1.80764	0.146	0.71072	0.45684-1.10568	0.02087	0.35923	0.854	12.8411	19	0.8466	11.9559	18	0.84951
GCST90274785	28	0.989	1.00205	0.75882-1.3232	0.829	1.02045	0.84939-1.22595	0.277	0.93248	0.82206-1.05773	0.312	0.8258	0.57377-1.18853	0.887	0.9861	0.81440-1.19399	-0.00763	0.57295	0.46	27.7978	27	0.42146	27.4536	26	0.38586
GCST90274810	17	0.428	1.21309	0.76197-1.9313	0.274	1.16271	0.88772-1.52288	0.282	1.11406	0.91523-1.35609	0.335	1.2338	0.81565-1.86631	0.386	1.19249	0.80938-1.75693	-0.00938	0.69764	0.766	11.9387	16	0.74819	11.7819	15	0.69546
GCST90274764	27	0.219	0.84063	0.64167-1.1013	0.741	0.9671	0.79293-1.17953	0.297	0.9273	0.80456-1.06876	0.928	1.0166	0.71207-1.45137	0.72	0.96195	0.77974-1.18672	0.01335	0.40949	0.159	34.2916	26	0.12784	33.3528	25	0.12248
GCST90274760	31	0.736	1.062	0.75086-1.5021	0.891	0.9855	0.79951-1.21477	0.309	0.92126	0.78664-1.07892	0.454	1.16003	0.79075-1.70175	0.546	1.11123	0.79221-1.55871	-0.01586	0.37361	0.039	45.2174	30	0.03684	43.979	29	0.03687
GCST90274782	21	0.671	0.96583	0.82459-1.1313	0.987	0.99882	0.86968-1.14713	0.32	0.95014	0.85907-1.05087	0.579	0.92541	0.70676-1.21171	0.665	0.96817	0.83823-1.11825	-0.0028	0.79501	0.636	17.4225	20	0.62539	17.3531	19	0.56596
GCST90274792	24	0.355	1.11515	0.88942-1.3982	0.241	1.12436	0.92424-1.36781	0.331	1.06729	0.93594-1.21708	0.782	0.94894	0.65748-1.36959	0.396	1.08765	0.89903-1.31585	-0.00683	0.64517	0.642	19.9003	23	0.64792	19.6823	22	0.60291
GCST90274759	532	0.632	1.01902	0.94350-1.1006	0.517	1.03401	0.93462-1.14396	0.339	1.02233	0.97710-1.06966	0.952	0.99234	0.77234-1.27500	0.513	1.03253	0.93817-1.13639	0.00031	0.91864	0.028	597.965	531	0.02304	597.953	530	0.02147
GCST90274812	23	0.299	1.27454	0.81554-1.9919	0.113	1.18735	0.96001-1.46854	0.34	1.09409	0.90958-1.31602	0.384	1.19753	0.80476-1.78201	0.183	1.24395	0.91135-1.69793	-0.01679	0.46886	0.021	37.0926	22	0.02311	36.1557	21	0.021
GCST90274780	33	0.362	0.88916	0.69309-1.1407	0.135	0.86733	0.71950-1.04553	0.35	0.93783	0.81983-1.07283	0.66	0.91824	0.63002-1.33831	0.416	0.8831	0.65706-1.18691	0.00621	0.62021	0.169	39.4481	32	0.17126	39.1318	31	0.14981
GCST90274762	35	0.38	1.17985	0.81956-1.6985	0.924	0.9903	0.81068-1.20973	0.393	0.93461	0.80029-1.09147	0.852	1.04173	0.68061-1.59444	0.776	1.05643	0.72583-1.53761	-0.02431	0.17646	0.156	41.7236	34	0.1702	39.443	33	0.20396
GCST90274786	24	0.061	0.75573	0.57258-0.9975	0.363	0.91148	0.74650-1.11292	0.401	0.94296	0.82215-1.08151	0.448	1.14821	0.80862-1.63043	0.435	0.90075	0.69600-1.16574	0.02639	0.08596	0.683	19.6468	23	0.66311	16.415	22	0.79477
GCST90274841	34	0.483	0.90053	0.67439-1.2025	0.401	0.92627	0.77461-1.10762	0.405	0.94559	0.82889-1.07871	0.543	0.89374	0.62466-1.27875	0.57	0.921	0.69511-1.22031	0.00599	0.71159	0.085	44.105	33	0.09372	43.914	32	0.07816
GCST90274807	23	0.323	0.83527	0.58924-1.1840	0.902	0.98541	0.77984-1.24516	0.416	0.93592	0.79792-1.09780	0.742	1.07091	0.71552-1.60283	0.714	1.07714	0.72747-1.59488	0.01659	0.48029	0.602	19.458	22	0.61691	18.9415	21	0.58889
GCST90274784	37	0.628	1.07493	0.80423-1.4367	0.964	1.00463	0.82286-1.22656	0.431	1.05399	0.92469-1.20137	0.588	1.10838	0.76614-1.60348	0.972	0.99489	0.74599-1.32684	-0.00192	0.88206	0.308	39.5569	36	0.31413	39.5317	35	0.27464
GCST90274819	26	0.377	1.161	0.83879-1.6070	0.29	1.1094	0.91533-1.34463	0.453	1.05572	0.91641-1.21621	0.474	1.13014	0.81259-1.57179	0.4	1.12631	0.85791-1.47867	-0.00963	0.53039	0.983	11.4458	25	0.99049	11.0405	24	0.98872
GCST90274839	29	0.122	0.8138	0.63204-1.0478	0.809	1.0247	0.84053-1.24921	0.456	0.94843	0.82522-1.09002	0.316	0.8286	0.57774-1.18838	0.722	1.04903	0.80841-1.36125	0.01923	0.16953	0.262	32.4275	28	0.25746	30.1992	27	0.30528
GCST90274804	552	0.879	0.99446	0.92593-1.0681	0.45	0.9671	0.88669-1.05480	0.458	1.01661	0.97329-1.06186	0.186	1.15901	0.93181-1.44161	0.199	0.95241	0.88415-1.02593	0.00243	0.44558	<0.001	688.712	551	6e-05	687.984	550	5e-05
GCST90274777	534	0.376	1.03286	0.96152-1.1095	0.936	0.99608	0.90444-1.09702	0.467	1.01557	0.97414-1.05876	0.568	1.06624	0.85571-1.32858	0.946	0.99717	0.91908-1.08190	-0.00162	0.56978	0.215	558.424	533	0.21565	558.085	532	0.20974
GCST90274832	24	0.073	0.7135	0.50190-1.0143	0.516	0.92745	0.73909-1.16383	0.481	0.94423	0.80496-1.10758	0.704	1.08555	0.71404-1.65037	0.849	0.97112	0.72061-1.30872	0.02718	0.09694	0.304	26.6097	23	0.27294	23.4108	22	0.37886
GCST90274774	551	0.977	1.00113	0.92717-1.0810	0.975	1.00163	0.90591-1.10747	0.55	0.98673	0.94448-1.03088	0.754	0.96524	0.77388-1.20391	0.994	1.00036	0.91096-1.09854	-0.0014	0.65253	0.011	632.071	550	0.00863	631.838	549	0.00811
GCST90274798	560	0.943	0.99742	0.92949-1.0703	0.243	1.04972	0.96755-1.13886	0.551	1.013	0.97085-1.05699	0.251	1.15361	0.90422-1.47178	0.315	1.04887	0.95576-1.15105	0.00164	0.58944	<0.001	687.421	559	0.00016	687.062	558	0.00015
GCST90274802	33	0.671	0.917	0.61678-1.3634	0.553	0.94317	0.77726-1.14450	0.557	0.956	0.82277-1.11081	0.659	0.91574	0.62151-1.34926	0.744	0.93277	0.61611-1.41217	0.00429	0.82503	0.118	41.9341	32	0.11238	41.8669	31	0.09209
GCST90274805	22	0.157	1.36165	0.90213-2.0552	0.33	1.12446	0.88800-1.42388	0.57	1.06242	0.86217-1.30918	0.12	0.68199	0.42941-1.08312	0.186	1.23646	0.91241-1.67560	-0.03636	0.18844	0.001	45.952	21	0.0013	42.0533	20	0.00272
GCST90274806	22	0.5	0.86902	0.58198-1.2977	0.542	1.06924	0.86206-1.32621	0.573	1.04735	0.89189-1.22989	0.57	1.1287	0.74818-1.70275	0.648	1.09544	0.74494-1.61085	0.02012	0.3312	0.358	22.5657	21	0.36756	21.4996	20	0.36827
GCST90274766	33	0.704	1.07357	0.74649-1.5439	0.321	1.10746	0.90531-1.35476	0.582	1.03947	0.90569-1.19302	0.142	1.43319	0.89686-2.29026	0.257	1.31927	0.82388-2.11251	-0.00297	0.85199	0.63	28.5957	32	0.63961	28.5603	31	0.59212
GCST90274775	35	0.924	0.98952	0.79940-1.2249	0.558	0.95596	0.82232-1.11132	0.598	1.03197	0.91797-1.16014	0.713	0.95271	0.73752-1.23069	0.669	0.96372	0.81463-1.14009	0.00579	0.64575	0.045	48.4292	34	0.05174	48.1154	33	0.04328
GCST90274846	43	0.984	0.99762	0.78641-1.2656	0.199	0.90339	0.77369-1.05484	0.609	0.971	0.86743-1.08692	0.459	0.87864	0.62560-1.23401	0.203	0.86799	0.70048-1.07556	-0.00293	0.80082	0.263	46.8862	42	0.27897	46.8126	41	0.24613
GCST90274790	520	0.229	0.95923	0.89639-1.0265	0.015	0.92072	0.86160-0.98389	0.62	0.98995	0.95121-1.03027	0.771	0.9706	0.79368-1.18696	0.055	0.92107	0.84707-1.00154	0.00331	0.2596	0.035	579.053	519	0.03461	577.632	518	0.03542
GCST90274840	541	0.544	1.02117	0.95435-1.0927	0.238	1.04983	0.96838-1.13814	0.635	1.0094	0.97120-1.04910	0.988	0.99856	0.82156-1.21369	0.42	1.03601	0.95067-1.12900	-0.00128	0.68286	0.025	603.202	540	0.03054	603.015	539	0.02888
GCST90274847	41	0.256	1.2157	0.87248-1.6939	0.725	0.96973	0.81705-1.15094	0.642	1.03661	0.89081-1.20628	0.687	1.07703	0.75281-1.54088	0.853	0.97451	0.74350-1.27729	-0.0172	0.29652	0.001	80.3089	40	0.00016	78.0678	39	0.0002
GCST90274823	26	0.915	1.01736	0.74492-1.3894	0.337	0.91266	0.75738-1.09979	0.646	1.03228	0.90154-1.18198	0.766	0.94607	0.65960-1.35695	0.471	0.91459	0.71995-1.16185	0.00194	0.91945	0.238	29.5045	25	0.24338	29.4917	24	0.20217
GCST90274770	31	0.563	1.03748	0.91703-1.1738	0.734	1.0181	0.91802-1.12909	0.667	1.01918	0.93460-1.11142	0.306	1.15381	0.88168-1.50992	0.683	1.01881	0.93242-1.11320	-0.00471	0.69023	0.219	37.8267	30	0.15425	37.6165	29	0.1311
GCST90274781	38	0.274	1.20258	0.86825-1.6656	0.817	1.0253	0.82936-1.26752	0.676	1.02819	0.90248-1.17142	0.909	0.97675	0.65411-1.45853	0.943	1.00897	0.79060-1.28765	-0.01854	0.31057	0.275	42.2251	37	0.25537	41.0197	36	0.25981
GCST90274843	36	0.397	1.08146	0.90437-1.2932	0.427	0.9464	0.82605-1.08429	0.699	1.02141	0.91735-1.13727	0.153	0.82255	0.63300-1.06885	0.167	0.84471	0.66831-1.06767	-0.01195	0.43742	<0.001	62.1886	35	0.00312	61.0793	34	0.00296
GCST90274813	21	0.502	0.87227	0.58986-1.2899	0.73	0.96045	0.76345-1.20827	0.703	1.03175	0.87857-1.21165	0.855	0.96371	0.65104-1.42654	0.803	0.95158	0.64781-1.39778	0.01641	0.36773	0.768	15.3277	20	0.75736	14.4763	19	0.75525
GCST90274817	31	0.668	1.05629	0.82471-1.3529	0.912	0.98893	0.81184-1.20464	0.707	0.97474	0.85285-1.11405	0.915	0.98094	0.69114-1.39224	0.726	0.95214	0.72525-1.25001	-0.00961	0.45582	0.768	24.2608	30	0.7601	23.6895	29	0.74409
GCST90274794	19	0.85	1.02567	0.79144-1.3292	0.385	0.91059	0.73719-1.12477	0.708	0.97229	0.83943-1.12618	0.451	0.867	0.60316-1.24626	0.36	0.85363	0.61364-1.18748	-0.00762	0.63009	0.641	14.7223	18	0.68094	14.4817	17	0.63276
GCST90274816	22	0.674	0.86985	0.45840-1.6506	0.504	0.91348	0.70068-1.19092	0.715	1.0433	0.83113-1.30963	0.263	0.72747	0.42310-1.25079	0.266	0.73835	0.43895-1.24199	0.01655	0.55756	0.041	34.0416	21	0.03587	33.4466	20	0.03012
GCST90274803	31	0.437	0.90992	0.71963-1.1505	0.546	0.94858	0.79920-1.12588	0.728	0.97979	0.87349-1.09904	0.546	0.91015	0.67306-1.23077	0.27	0.89989	0.74873-1.08159	0.00945	0.48407	0.839	22.6597	30	0.82899	22.1572	29	0.81362
GCST90274838	27	0.863	1.0323	0.72146-1.4771	0.485	0.92572	0.74541-1.14965	0.73	0.97317	0.83412-1.13540	0.655	0.90505	0.58735-1.39460	0.504	0.87447	0.59349-1.28848	-0.00631	0.72268	0.316	28.8307	26	0.31884	28.6829	25	0.27739
GCST90274788	24	0.642	0.91723	0.64057-1.3134	0.599	0.94946	0.78253-1.15201	0.737	0.97437	0.83741-1.13373	0.714	0.94175	0.68604-1.29277	0.669	0.94976	0.75222-1.19917	0.00655	0.71827	0.194	29.455	23	0.16569	29.2773	22	0.13711
GCST90274829	31	0.63	1.08376	0.78382-1.4985	0.342	0.90669	0.74081-1.10973	0.743	1.02644	0.87820-1.19970	0.365	0.82405	0.54580-1.24416	0.339	0.83507	0.58040-1.20149	-0.00607	0.70914	0.116	39.8761	30	0.10729	39.6819	29	0.08927
GCST90274791	45	0.134	1.20388	0.94855-1.5279	0.076	1.16211	0.98437-1.37194	0.768	1.02178	0.88535-1.17924	0.601	1.10151	0.76899-1.57781	0.057	1.18604	0.99967-1.40715	-0.02139	0.10232	<0.001	93.6851	44	2e-05	87.9834	43	6e-05
GCST90274826	26	0.849	0.97302	0.73642-1.2856	0.444	0.92813	0.76664-1.12364	0.784	1.02054	0.88230-1.18044	0.282	0.8131	0.56249-1.17535	0.176	0.80812	0.59858-1.09101	0.00588	0.69561	0.178	31.1355	25	0.18457	30.9334	24	0.15571
GCST90274789	28	0.512	1.09244	0.84182-1.4177	0.63	0.94982	0.77017-1.17137	0.799	0.98257	0.85838-1.12473	0.47	1.1612	0.77846-1.73211	0.934	0.98791	0.74121-1.31671	-0.01184	0.35972	0.48	26.307	27	0.50162	25.4377	26	0.49432
GCST90274763	23	0.598	0.92683	0.70172-1.2241	0.785	1.02964	0.83482-1.26993	0.823	1.01698	0.87772-1.17833	0.506	1.13683	0.78385-1.64877	0.869	1.02398	0.77559-1.35192	0.01158	0.44945	0.844	15.3286	22	0.84775	14.7346	21	0.83603
GCST90274844	47	0.717	1.03574	0.85743-1.2511	0.92	0.99248	0.85718-1.14913	0.829	0.98975	0.90115-1.08705	0.205	0.8299	0.62457-1.10272	0.678	0.95989	0.79241-1.16277	-0.00603	0.58901	0.434	46.162	46	0.46557	45.8602	45	0.43631
GCST90274836	34	0.387	1.13465	0.85566-1.5046	0.068	1.16101	0.98900-1.36294	0.83	0.98708	0.87661-1.11147	0.609	1.10218	0.76210-1.59403	0.111	1.17405	0.96873-1.42289	-0.01733	0.29436	0.083	44.2901	33	0.09062	42.7709	32	0.09667
GCST90274835	35	0.626	0.94167	0.74108-1.1965	0.693	0.96406	0.80379-1.15629	0.835	1.01238	0.90191-1.13638	0.429	1.16865	0.79769-1.71212	0.746	0.95958	0.74890-1.22952	0.00797	0.50356	0.825	25.9786	34	0.83626	25.5212	33	0.82049
GCST90274808	20	0.413	0.84247	0.56412-1.2582	0.929	0.98973	0.78916-1.24127	0.87	0.98623	0.83519-1.16460	0.886	0.97197	0.66202-1.42704	0.784	0.95359	0.68231-1.33272	0.0191	0.40861	0.72	14.9958	19	0.72287	14.2799	18	0.71067
GCST90274799	25	0.649	1.06955	0.80368-1.4234	0.893	0.98738	0.82089-1.18764	0.874	0.98816	0.85296-1.14479	0.25	0.80402	0.55958-1.15524	0.854	1.0256	0.78577-1.33864	-0.00969	0.53099	0.07	34.2692	24	0.08	33.6767	23	0.06998
GCST90274778	30	0.413	1.20514	0.77597-1.8717	0.405	1.09307	0.88635-1.34800	0.878	1.01233	0.86547-1.18411	0.342	1.22613	0.81079-1.85423	0.425	1.16584	0.80402-1.69046	-0.01633	0.41287	0.224	33.8796	29	0.24369	33.0637	28	0.23341
GCST90274771	33	0.772	1.03653	0.81505-1.3182	0.917	1.00914	0.85112-1.19649	0.899	0.99212	0.87762-1.12157	0.753	0.94958	0.69035-1.30616	0.654	1.04411	0.86608-1.25874	-0.0057	0.67953	0.14	40.7039	32	0.13913	40.4768	31	0.11864
GCST90274848	33	0.497	1.05202	0.91040-1.2157	0.224	1.06665	0.96137-1.18346	0.904	1.00591	0.91436-1.10662	0.785	0.95403	0.68181-1.33494	0.24	1.06627	0.96005-1.18425	-0.00912	0.42291	0.175	41.0389	32	0.13139	40.1839	31	0.12495
GCST90274830	27	0.592	1.11975	0.74453-1.6841	0.167	1.13942	0.94676-1.37127	0.925	1.00948	0.83041-1.22717	0.565	1.10322	0.79279-1.53520	0.456	1.08374	0.87978-1.33498	-0.01213	0.57426	0.004	56.8961	26	0.00043	56.168	25	0.00035
GCST90274827	24	0.321	1.10674	0.90977-1.3464	0.885	0.9868	0.82402-1.18175	0.928	1.00558	0.89121-1.13464	0.683	0.93875	0.69554-1.26699	0.892	0.98668	0.81448-1.19529	-0.01642	0.23648	0.77	17.6812	23	0.77455	16.2	22	0.80584
GCST90274779	24	0.26	0.888	0.72595-1.0862	0.727	0.97014	0.81811-1.15042	0.93	0.99434	0.87560-1.12919	0.554	1.12003	0.77391-1.62095	0.735	0.97023	0.81645-1.15298	0.01743	0.17009	0.843	16.4338	23	0.83608	14.4219	22	0.88583
GCST90274787	33	0.563	1.10074	0.79818-1.5180	0.721	1.03503	0.85700-1.25005	0.937	1.00524	0.88245-1.14512	0.703	1.0668	0.76708-1.48362	0.238	1.15655	0.91237-1.46607	-0.0111	0.54852	0.277	36.0264	32	0.28562	35.6037	31	0.2605
GCST90274769	37	0.872	0.97597	0.72691-1.3104	0.868	1.01581	0.84443-1.22198	0.965	1.00307	0.87366-1.15165	0.495	0.88015	0.61202-1.26576	0.702	0.93334	0.65699-1.32594	0.00275	0.83775	0.896	26.296	36	0.88214	26.2534	35	0.85687
GCST90274797	28	0.535	0.96121	0.84977-1.0873	0.941	1.00392	0.90548-1.11306	0.978	0.99881	0.91688-1.08806	0.659	0.94788	0.74918-1.19927	0.945	0.99647	0.90190-1.10095	0.00821	0.40409	0.817	21.3186	27	0.77114	20.5992	26	0.76234
GCST90274801	19	0.946	1.01637	0.63977-1.6147	0.845	1.02422	0.80543-1.30244	0.985	1.00205	0.80751-1.24345	0.929	0.98187	0.65959-1.46162	0.91	0.98187	0.71791-1.34287	-0.0017	0.9462	0.015	34.7984	18	0.01002	34.7888	17	0.00663

## Sheet: S3.2
The resluts of forward univariable MR analysis between immune factors phenotypes and the risk of AAA in UK Bio-Bank database.
id	nsnp	MR-Egger			Weighted median			Inverse variance weighted			Simple mode			Weighted mode			MR-Egger intercept		MR-PRESSO global	MR-IVW			MR-Egeer
		p_value	OR	95% OR	p_value	OR	95% OR	p_value	OR	95% OR	p_value	OR	95% OR	p_value	OR	95% OR	egger intercept	p_value	p_value	Q	Q_df	Q_pval	Q	Q_df	Q_pval
GCST90274761	12	0.982	0.98212	0.21552-4.4754	0.088	0.5082	0.23379-1.10471	0.02	0.52246	0.30286-0.90129	0.287	0.47875	0.13164-1.74122	0.319	0.48443	0.12405-1.89174	-0.06106	0.40211	0.489	10.9088	11	0.45094	10.133	10	0.4289
GCST90274775	31	0.055	2.05688	1.01513-4.1677	0.002	1.94373	1.26372-2.98966	0.022	1.55091	1.06604-2.25630	0.546	1.38492	0.48663-3.94136	0.014	1.91711	1.17900-3.11733	-0.03553	0.36229	0.014	50.867	30	0.01006	49.4074	29	0.01045
GCST90274827	23	0.882	1.03093	0.69322-1.5332	0.154	1.26924	0.91459-1.76140	0.03	1.44457	1.03660-2.01310	0.624	1.18636	0.60524-2.32545	0.275	1.18636	0.87955-1.60020	0.08724	0.01994	0.03	38.598	22	0.01568	29.642	21	0.09942
GCST90274815	13	0.4	0.56947	0.16131-2.0103	0	0.26927	0.13420-0.54027	0.034	0.51508	0.27869-0.95201	0.313	0.38365	0.06457-2.27934	0.003	0.26762	0.13465-0.53187	-0.01361	0.85961	0.062	20.6194	12	0.05624	20.5581	11	0.03825
GCST90274767	32	0.176	0.77298	0.53701-1.1127	0.072	0.74203	0.53614-1.02698	0.049	0.77853	0.60690-0.99870	0.885	0.93778	0.39667-2.21703	0.068	0.74532	0.54932-1.01125	0.00132	0.95828	0.766	26.2232	31	0.71056	26.2204	30	0.66383
GCST90274765	36	0.52	1.19998	0.69213-2.0805	0.656	1.1179	0.68447-1.82581	0.075	0.74388	0.53710-1.03027	0.865	0.92102	0.36008-2.35580	0.481	1.19473	0.73206-1.94982	-0.06337	0.04651	0.196	41.5465	35	0.20696	36.9124	34	0.33579
GCST90274787	30	0.32	0.61058	0.23481-1.5877	0.119	0.67646	0.41362-1.10631	0.083	0.71552	0.49014-1.04455	0.456	0.67582	0.24435-1.86918	0.048	0.52437	0.28381-0.96882	0.01931	0.72506	0.128	37.4197	29	0.13579	37.2518	28	0.11341
GCST90274780	33	0.084	0.58008	0.31898-1.0549	0.105	0.68338	0.43102-1.08349	0.109	0.75812	0.54018-1.06399	0.493	1.34135	0.58465-3.07742	0.14	0.66121	0.38672-1.13056	0.03305	0.29567	0.228	38.5055	32	0.19879	37.1495	31	0.20665
GCST90274835	36	0.922	0.96894	0.51740-1.8145	0.318	0.78768	0.49322-1.25794	0.116	0.78735	0.58423-1.06109	0.107	0.46592	0.18843-1.15207	0.307	0.70236	0.36026-1.36931	-0.02175	0.46531	0.472	35.3968	35	0.44948	34.8381	34	0.42795
GCST90274839	28	0.057	2.44466	1.01475-5.8895	0.423	1.24697	0.72706-2.13865	0.133	1.38416	0.90564-2.11552	0.764	1.20896	0.35411-4.12750	0.761	1.17555	0.41819-3.30447	-0.0636	0.162	0.078	38.2198	27	0.07445	35.3994	26	0.10328
GCST90274818	31	0.068	0.5407	0.28640-1.0208	0.801	0.93494	0.55438-1.57673	0.145	0.77296	0.54652-1.09323	0.322	1.70408	0.60381-4.80928	0.818	0.90324	0.38165-2.13769	0.04247	0.19875	0.711	25.0381	30	0.72318	23.3084	29	0.76224
GCST90274783	491	0.092	0.83445	0.67618-1.0298	0.331	0.87227	0.66212-1.14912	0.15	0.91915	0.81959-1.03081	0.143	0.61431	0.32056-1.17725	0.288	0.8637	0.65927-1.13152	0.00861	0.28306	0.99	415.113	490	0.99387	413.958	489	0.99401
GCST90274781	35	0.739	1.14777	0.51312-2.5673	0.107	0.67664	0.42052-1.08877	0.174	0.78383	0.55187-1.11329	0.07	0.4237	0.17215-1.04280	0.197	0.41759	0.11379-1.53253	-0.04747	0.30984	0.042	48.688	34	0.04916	47.1674	33	0.05237
GCST90274841	33	0.778	1.10285	0.56120-2.1673	0.52	1.16925	0.72638-1.88214	0.182	1.23379	0.90649-1.67925	0.171	1.96198	0.76334-5.04277	0.538	1.25797	0.61116-2.58933	0.01332	0.71631	0.466	31.7321	32	0.48009	31.5951	31	0.43654
GCST90274790	523	0.987	1.00155	0.83098-1.2071	0.627	1.06381	0.82918-1.36483	0.183	0.93175	0.83966-1.03394	0.676	0.87596	0.47124-1.62830	0.816	1.02651	0.82363-1.27935	-0.00701	0.36141	0.482	525.089	522	0.45382	524.249	521	0.45181
GCST90274812	24	0.144	2.2399	0.79004-6.3505	0.837	1.06032	0.60769-1.85008	0.191	1.29982	0.87738-1.92566	0.915	1.0582	0.37706-2.96981	0.967	1.02028	0.39451-2.63865	-0.05668	0.28103	0.748	18.6234	23	0.72285	17.402	22	0.7408
GCST90274820	28	0.912	0.96332	0.50121-1.8515	0.44	1.19882	0.75665-1.89937	0.191	0.78978	0.55465-1.12460	0.118	0.41411	0.14183-1.20910	0.338	1.27626	0.78200-2.08290	-0.02421	0.48329	0.101	34.2669	27	0.15842	33.613	26	0.14505
GCST90274819	29	0.352	1.47266	0.66058-3.2830	0.727	1.09663	0.65272-1.84244	0.2	1.26418	0.88300-1.80991	0.917	1.0582	0.36826-3.04070	0.914	0.94663	0.35487-2.52518	-0.01559	0.67974	0.718	23.4945	28	0.70791	23.3204	27	0.66769
GCST90274778	31	0.983	0.98928	0.37379-2.6182	0.299	1.30383	0.79034-2.15094	0.243	1.23593	0.86636-1.76314	0.496	1.4257	0.52006-3.90844	0.409	1.52408	0.56870-4.08439	0.02141	0.63378	0.608	27.365	30	0.60405	27.1331	29	0.56452
GCST90274802	33	0.824	0.90585	0.38128-2.1521	0.64	0.88564	0.53230-1.47354	0.253	0.80923	0.56294-1.16327	0.308	1.79542	0.59348-5.43160	0.291	1.74417	0.63142-4.81795	-0.01276	0.77959	0.146	40.8448	32	0.13583	40.7401	31	0.11318
GCST90274804	537	0.305	1.10512	0.91298-1.3377	0.622	1.0563	0.84950-1.31343	0.257	1.06703	0.95372-1.19381	0.648	0.86118	0.45383-1.63416	0.621	1.05488	0.85340-1.30394	-0.00361	0.65646	0.041	597.021	536	0.03457	596.8	535	0.03279
GCST90274843	35	0.524	1.12852	0.78108-1.6305	0.289	0.82138	0.57112-1.18131	0.267	0.87587	0.69309-1.10686	0.844	0.93553	0.48465-1.80586	0.944	0.98725	0.69084-1.41084	-0.05099	0.09398	0.409	35.5225	34	0.39643	32.5487	33	0.48944
GCST90274794	18	0.501	1.40487	0.53401-3.6959	0.336	1.38665	0.71267-2.69801	0.273	1.31319	0.80685-2.13729	0.131	3.05868	0.76855-12.17298	0.155	2.5321	0.74434-8.61365	-0.00764	0.87494	0.257	20.1997	17	0.26414	20.1674	16	0.21277
GCST90274834	19	0.074	0.40943	0.16303-1.0283	0.483	0.78599	0.40114-1.54004	0.275	0.77548	0.49141-1.22376	0.281	0.52047	0.16468-1.64488	0.513	0.73731	0.30144-1.80344	0.0733	0.137	0.468	18.3028	18	0.43588	15.8667	17	0.5333
GCST90274769	34	0.652	0.80625	0.31871-2.0396	0.094	1.57311	0.92601-2.67240	0.282	1.27516	0.81865-1.98622	0.147	2.12117	0.78634-5.72187	0.221	1.91226	0.69024-5.29779	0.04608	0.27919	0.022	52.0158	33	0.01882	50.1178	32	0.02172
GCST90274768	509	0.124	0.88374	0.75524-1.0341	0.343	0.90561	0.73789-1.11147	0.295	0.94727	0.85591-1.04838	0.246	1.50673	0.75396-3.01109	0.166	0.8821	0.73875-1.05327	0.00792	0.25745	0.417	516.109	508	0.39207	514.804	507	0.39561
GCST90274810	17	0.933	1.04233	0.40208-2.7021	0.488	1.24504	0.66974-2.31453	0.321	1.25398	0.80173-1.96136	0.561	0.7105	0.22992-2.19556	0.777	0.85556	0.29671-2.46700	0.02255	0.67272	0.576	14.8464	16	0.53591	14.6608	15	0.47611
GCST90274791	43	0.569	0.8476	0.48172-1.4914	0.101	0.72263	0.49038-1.06487	0.332	0.85798	0.62944-1.16951	0.483	1.37446	0.56943-3.31756	0.161	0.72059	0.45956-1.12988	0.00148	0.95977	0.043	59.7669	42	0.03688	59.7632	41	0.02927
GCST90274840	527	0.192	0.88542	0.73754-1.0630	0.563	0.9224	0.70149-1.21287	0.341	0.95235	0.86131-1.05301	0.415	1.302	0.69086-2.45374	0.601	0.9244	0.68860-1.24096	0.00749	0.34986	0.423	528.634	526	0.45952	527.754	525	0.45802
GCST90274847	43	0.558	0.82934	0.44543-1.5441	0.338	0.81599	0.53832-1.23689	0.36	0.87923	0.66727-1.15852	0.882	0.93829	0.40590-2.16897	0.395	0.76157	0.40911-1.41769	0.00616	0.83815	0.567	39.5722	42	0.57809	39.53	41	0.53601
GCST90274776	28	0.838	0.90064	0.33373-2.4305	0.997	0.99892	0.56298-1.77244	0.376	1.20404	0.79851-1.81553	0.396	1.62515	0.53874-4.90237	0.86	1.05937	0.56193-1.99716	0.03095	0.53349	0.155	34.7594	27	0.14506	34.235	26	0.12921
GCST90274763	19	0.772	0.8458	0.27805-2.5729	0.904	0.96183	0.51170-1.80792	0.393	1.22822	0.76626-1.96868	0.842	1.11823	0.37781-3.30970	0.682	0.84799	0.39020-1.84287	0.04011	0.47661	0.246	21.3244	18	0.26336	20.68	17	0.24093
GCST90274785	26	0.652	1.19732	0.55302-2.5922	0.756	0.92775	0.57778-1.48970	0.394	0.85451	0.59533-1.22651	0.95	0.97468	0.43775-2.17021	0.671	0.90079	0.55930-1.45079	-0.03685	0.34232	0.247	30.6661	25	0.20032	29.512	24	0.20146
GCST90274772	24	0.288	0.82482	0.58320-1.1665	0.287	0.84748	0.62496-1.14923	0.412	0.90137	0.70348-1.15492	0.942	1.02997	0.46974-2.25835	0.295	0.84557	0.62232-1.14891	0.01811	0.48041	0.668	20.618	23	0.6044	20.1027	22	0.57662
GCST90274833	43	0.656	0.88502	0.51925-1.5085	0.234	0.76728	0.49618-1.18648	0.429	0.89978	0.69264-1.16887	0.614	1.23776	0.54377-2.81745	0.416	0.82261	0.51599-1.31143	0.00183	0.94451	0.375	45.7285	42	0.32001	45.7231	41	0.28237
GCST90274773	28	0.148	0.51125	0.21170-1.2347	0.473	1.18929	0.74070-1.90957	0.458	0.87226	0.60777-1.25186	0.368	1.50574	0.62658-3.61849	0.432	1.28325	0.69506-2.36918	0.05805	0.20547	0.204	33.8108	27	0.17162	31.7513	26	0.20147
GCST90274759	529	0.434	1.08078	0.88960-1.3131	0.145	1.20355	0.93788-1.54448	0.459	0.9578	0.85451-1.07357	0.957	1.01823	0.52567-1.97232	0.215	1.16309	0.91647-1.47607	-0.0114	0.13412	0.199	554.079	528	0.20894	551.722	527	0.22054
GCST90274786	25	0.99	1.00578	0.41654-2.4286	0.826	1.06361	0.61435-1.84140	0.463	1.16655	0.77294-1.76058	0.573	0.71796	0.23011-2.24010	0.444	0.70763	0.29642-1.68929	0.01707	0.71127	0.148	30.3956	24	0.17198	30.2111	23	0.14344
GCST90274788	25	0.376	1.49152	0.62630-3.5520	0.764	1.08468	0.63824-1.84341	0.474	1.1522	0.78186-1.69795	0.596	1.29802	0.50179-3.35770	0.884	1.05548	0.51477-2.16414	-0.02949	0.51977	0.145	31.1089	24	0.15067	30.5414	23	0.13448
GCST90274831	22	0.503	1.47652	0.48244-4.5189	0.458	1.25415	0.68998-2.27962	0.484	1.18025	0.74164-1.87826	0.361	0.60938	0.21537-1.72418	0.419	1.44066	0.60518-3.42956	-0.02225	0.66949	0.177	27.1825	21	0.16489	26.9298	20	0.13725
GCST90274824	27	0.084	0.60361	0.34825-1.0462	0.107	0.70931	0.46725-1.07678	0.494	0.90588	0.68248-1.20241	0.682	0.83739	0.36128-1.94091	0.149	0.68532	0.41667-1.12720	0.05777	0.10772	0.286	28.3106	26	0.34335	25.4742	25	0.43606
GCST90274808	20	0.536	1.42643	0.47361-4.2962	0.615	1.16623	0.64088-2.12221	0.508	1.18323	0.71937-1.94619	0.84	0.88631	0.27873-2.81826	0.889	0.92802	0.33105-2.60147	-0.02345	0.71229	0.114	26.6952	19	0.11196	26.4886	18	0.0891
GCST90274766	32	0.618	0.7403	0.22960-2.3869	0.797	0.92844	0.52804-1.63246	0.511	0.85752	0.54232-1.35590	0.686	0.76408	0.20976-2.78328	0.804	0.86254	0.27128-2.74249	0.01388	0.7904	0.01	53.203	31	0.00782	53.0757	30	0.00582
GCST90274845	21	0.247	0.57049	0.22694-1.4342	0.442	1.26024	0.69908-2.27187	0.511	1.14955	0.75868-1.74179	0.25	0.48595	0.14736-1.60252	0.446	1.57742	0.50009-4.97561	0.08979	0.11154	0.716	15.9262	20	0.72119	13.1412	19	0.83127
GCST90274764	26	0.921	1.03496	0.52668-2.0338	0.416	0.8192	0.50653-1.32487	0.513	0.89463	0.64067-1.24925	0.378	0.66684	0.27531-1.61518	0.717	0.89404	0.49168-1.62567	-0.01944	0.63114	0.843	17.8526	25	0.84858	17.6161	24	0.82123
GCST90274760	30	0.294	1.59958	0.67671-3.7810	0.192	1.39588	0.84600-2.30319	0.515	1.12878	0.78403-1.62512	0.416	1.58354	0.53203-4.71324	0.425	1.56334	0.52912-4.61902	-0.03649	0.38763	0.347	31.3861	29	0.34745	30.5459	28	0.33761
GCST90274811	22	0.971	1.01872	0.38390-2.7033	0.788	1.08961	0.58291-2.03676	0.517	0.85812	0.54046-1.36249	0.821	1.15039	0.34759-3.80741	0.828	1.13245	0.37372-3.43156	-0.02	0.69801	0.201	26.7057	21	0.18081	26.5004	20	0.14991
GCST90274774	543	0.974	1.00308	0.83455-1.2056	0.253	0.87729	0.70102-1.09787	0.518	0.96562	0.86851-1.07358	0.285	1.41331	0.74980-2.66397	0.318	0.88843	0.70444-1.12049	-0.00366	0.61989	0.496	541.581	542	0.497	541.334	541	0.48786
GCST90274758	16	0.337	2.05756	0.49549-8.5442	0.386	1.32443	0.70163-2.50006	0.528	1.20178	0.67920-2.12642	0.148	2.31585	0.78674-6.81693	0.9	1.05159	0.48784-2.26680	-0.05755	0.43159	0.075	24.411	15	0.05843	23.3187	14	0.05528
GCST90274826	26	0.664	1.15897	0.60034-2.2374	0.536	0.85272	0.51477-1.41251	0.531	0.89762	0.64021-1.25855	0.52	0.75153	0.31881-1.77156	0.702	0.87992	0.46055-1.68117	-0.03074	0.38361	0.793	19.0801	25	0.79326	18.2924	24	0.7886
GCST90274789	28	0.171	0.51134	0.20096-1.3011	0.764	0.91395	0.50759-1.64564	0.557	0.88489	0.58805-1.33156	0.994	0.9955	0.29507-3.35859	0.662	0.74805	0.20671-2.70712	0.05336	0.21306	0.264	31.1856	27	0.26359	29.3464	26	0.29557
GCST90274784	34	0.673	1.17953	0.55124-2.5239	0.491	0.8364	0.50288-1.39111	0.561	1.10681	0.78602-1.55850	0.341	0.62623	0.24215-1.61951	0.345	0.68867	0.32084-1.47821	-0.00611	0.85549	0.541	31.8941	33	0.52204	31.8604	32	0.47368
GCST90274817	29	0.074	2.15827	0.95842-4.8602	0.816	0.93299	0.51972-1.67487	0.581	0.89687	0.60908-1.32063	0.703	0.80203	0.26122-2.46248	0.596	0.7551	0.27019-2.11027	-0.09016	0.02294	0.48	27.9097	28	0.46924	22.0923	27	0.73267
GCST90274821	29	0.196	0.65845	0.35508-1.2210	0.614	0.88949	0.56426-1.40216	0.599	0.91774	0.66627-1.26412	0.355	0.63828	0.25047-1.62652	0.404	0.79354	0.46500-1.35422	0.04232	0.2284	0.665	24.0585	28	0.67844	22.5395	27	0.70948
GCST90274782	21	0.686	0.91441	0.59613-1.4026	0.77	1.05366	0.74169-1.49684	0.627	0.93529	0.71395-1.22524	0.979	0.98897	0.43155-2.26642	0.9	1.02497	0.69986-1.50110	0.00397	0.89348	0.382	22.2182	20	0.32879	22.1966	19	0.27458
GCST90274797	28	0.753	0.94485	0.66630-1.3399	0.74	1.04895	0.79128-1.39051	0.629	1.06214	0.83158-1.35663	0.091	2.52371	0.89582-7.10983	0.782	1.04156	0.78236-1.38665	0.02299	0.36463	0.5	28.8831	27	0.36659	27.9672	26	0.36007
GCST90274829	30	0.202	1.80788	0.74350-4.3960	0.953	0.98349	0.56600-1.70895	0.633	1.10635	0.73053-1.67552	0.352	0.56317	0.17158-1.84846	0.433	0.61889	0.18984-2.01770	-0.05079	0.23178	0.28	33.3766	29	0.26281	31.6859	28	0.28748
GCST90274844	46	0.772	0.92322	0.54007-1.5782	0.653	0.91856	0.63460-1.32958	0.638	0.9408	0.72949-1.21331	0.274	0.62769	0.27517-1.43179	0.776	0.92302	0.53289-1.59877	0.00239	0.93771	0.441	46.0569	45	0.42828	46.0504	44	0.38738
GCST90274793	26	0.519	1.40039	0.51119-3.8363	0.714	1.11555	0.62199-2.00076	0.639	1.1066	0.72456-1.69007	0.869	1.08857	0.40019-2.96103	0.904	1.0528	0.45982-2.41049	-0.02521	0.61725	0.256	29.2141	25	0.25507	28.9053	24	0.22371
GCST90274809	21	0.652	1.20303	0.54625-2.6495	0.487	1.21266	0.70438-2.08772	0.639	1.10453	0.72912-1.67324	0.576	1.29827	0.52785-3.19316	0.655	1.24079	0.48776-3.15636	-0.01206	0.80576	0.998	6.83897	20	0.99718	6.77679	19	0.99531
GCST90274798	537	0.342	1.09135	0.91127-1.3070	0.373	0.90088	0.71616-1.13324	0.67	1.02294	0.92172-1.13526	0.321	0.72775	0.38891-1.36182	0.473	0.9157	0.72004-1.16453	-0.00634	0.38896	0.462	536.786	536	0.48232	536.041	535	0.47919
GCST90274799	29	0.46	0.66105	0.22421-1.9490	0.554	0.85677	0.51319-1.43038	0.678	1.09577	0.71160-1.68734	0.486	0.66988	0.22055-2.03465	0.515	0.71128	0.25831-1.95855	0.04853	0.32656	0.06	40.854	28	0.05538	39.3971	27	0.05828
GCST90274779	23	0.617	1.17429	0.63165-2.1831	0.933	0.98128	0.63000-1.52842	0.706	0.92638	0.62274-1.37806	0.257	0.55276	0.20366-1.50026	0.801	0.9413	0.59120-1.49873	-0.0352	0.33982	0.144	32.1912	22	0.07419	30.7923	21	0.07718
GCST90274828	22	0.209	0.59673	0.27389-1.3001	0.59	1.16688	0.66586-2.04491	0.715	1.07962	0.71523-1.62964	0.469	1.57845	0.46897-5.31276	0.447	1.5581	0.50699-4.78846	0.07147	0.09773	0.382	22.4014	21	0.3767	19.3837	20	0.49703
GCST90274848	32	0.946	1.01249	0.71077-1.4423	0.703	0.94981	0.72918-1.23718	0.734	0.96268	0.77331-1.19842	0.841	0.92712	0.44496-1.93176	0.733	0.95366	0.72774-1.24972	-0.01051	0.72205	0.373	34.0033	31	0.32495	33.8578	30	0.28655
GCST90274805	22	0.449	0.72942	0.32767-1.6238	0.462	0.82126	0.48587-1.38814	0.739	0.93842	0.64586-1.36352	0.842	0.90251	0.33281-2.44740	0.318	0.67278	0.31504-1.43675	0.03273	0.49334	0.848	13.7435	21	0.88036	13.2566	20	0.8661
GCST90274762	30	0.63	1.25816	0.49889-3.1730	0.76	0.91839	0.53142-1.58712	0.754	0.9385	0.63099-1.39586	0.455	1.58826	0.47975-5.25808	0.448	1.52531	0.52023-4.47218	-0.03063	0.49733	0.664	25.4328	29	0.65561	24.96	28	0.63001
GCST90274814	21	0.644	1.35746	0.37868-4.8661	0.507	1.24142	0.65562-2.35064	0.758	1.08455	0.64755-1.81648	0.704	1.28346	0.36139-4.55816	0.652	1.32442	0.39826-4.40439	-0.02393	0.70937	0.067	30.5594	20	0.06128	30.3309	19	0.04774
GCST90274832	28	0.167	1.83012	0.79472-4.2145	0.605	0.85674	0.47711-1.53841	0.759	1.06123	0.72545-1.55242	0.533	0.71027	0.24565-2.05367	0.521	0.7637	0.33910-1.71998	-0.05359	0.16214	0.652	23.2377	27	0.67218	21.1676	26	0.73326
GCST90274792	26	1	1.00004	0.57333-1.7443	0.805	0.94128	0.58184-1.52277	0.769	0.95413	0.69764-1.30492	0.849	1.08821	0.46113-2.56804	0.898	1.03148	0.64512-1.64923	-0.007	0.84294	0.567	23.7882	25	0.53164	23.7481	24	0.47607
GCST90274822	509	0.455	0.94171	0.80466-1.1021	0.811	1.02308	0.84845-1.23366	0.794	1.01375	0.91520-1.12291	0.645	0.84966	0.42483-1.69930	0.985	1.00178	0.83131-1.20722	0.00822	0.2272	0.837	477.783	508	0.82804	476.321	507	0.83211
GCST90274830	31	0.884	1.05146	0.53934-2.0498	0.879	1.03636	0.65328-1.64409	0.805	0.96056	0.69779-1.32229	0.823	1.10445	0.46569-2.61939	0.848	1.05352	0.62196-1.78453	-0.01048	0.76455	0.765	24.2086	30	0.7625	24.1172	29	0.72313
GCST90274816	22	0.314	0.54492	0.17231-1.7233	0.538	0.82734	0.45251-1.51264	0.828	1.05038	0.67474-1.63515	0.597	0.71988	0.21682-2.39014	0.659	0.782	0.26654-2.29429	0.06284	0.24031	0.903	13.1835	21	0.90206	11.7189	20	0.92541
GCST90274771	31	0.505	1.23949	0.66460-2.3117	0.181	1.3688	0.86404-2.16845	0.844	0.97003	0.71579-1.31456	0.38	0.63079	0.22871-1.73975	0.334	1.28274	0.78068-2.10768	-0.02936	0.38437	0.439	29.8397	30	0.47388	29.058	29	0.46205
GCST90274837	21	0.937	0.95245	0.29128-3.1144	0.672	0.86533	0.44320-1.68952	0.846	0.95247	0.58238-1.55773	0.289	0.46126	0.11460-1.85657	0.346	0.51553	0.13434-1.97830	0	0.99998	0.346	22.4846	20	0.31481	22.4846	19	0.26081
GCST90274796	20	0.488	0.69114	0.24849-1.9223	0.766	1.09262	0.60922-1.95956	0.847	1.04316	0.67847-1.60389	0.786	1.16558	0.39155-3.46975	0.767	1.17732	0.40642-3.41053	0.04056	0.39609	0.885	12.451	19	0.86546	11.6951	18	0.86257
GCST90274825	19	0.708	1.08397	0.71572-1.6417	0.763	1.05158	0.75826-1.45836	0.86	1.02468	0.78176-1.34306	0.758	0.87648	0.38363-2.00248	0.789	1.04604	0.75545-1.44840	-0.00989	0.73043	0.764	14.1953	18	0.71627	14.0726	17	0.66195
GCST90274836	31	0.175	1.5959	0.82546-3.0854	0.431	1.19029	0.77133-1.83681	0.87	1.02375	0.77232-1.35703	0.741	0.88041	0.41597-1.86343	0.399	1.23416	0.76184-1.99932	-0.05513	0.15502	0.657	26.372	30	0.65602	24.2402	29	0.717
GCST90274803	30	0.635	0.86177	0.46962-1.5814	0.778	1.06087	0.70407-1.59848	0.883	1.02269	0.75832-1.37924	0.781	1.11835	0.51284-2.43877	0.807	1.06408	0.64952-1.74321	0.02224	0.53047	0.682	25.5616	29	0.64881	25.1581	28	0.61921
GCST90274795	32	0.138	1.78657	0.84765-3.7655	0.664	1.12017	0.67083-1.87049	0.89	1.02546	0.71716-1.46629	0.768	1.19226	0.37454-3.79527	0.875	1.0886	0.38065-3.11322	-0.06244	0.10933	0.191	36.6882	31	0.22184	33.635	30	0.29566
GCST90274800	25	0.812	0.94231	0.58136-1.5274	0.808	1.03817	0.76712-1.40500	0.904	1.01782	0.76339-1.35704	0.566	0.78311	0.34349-1.78540	0.811	1.03673	0.77370-1.38919	0.01427	0.69765	0.074	37.167	24	0.04211	36.9186	23	0.03316
GCST90274842	34	0.75	0.9079	0.50351-1.6371	0.608	1.12425	0.71903-1.75782	0.906	0.97833	0.67915-1.40930	0.573	1.26644	0.56200-2.85386	0.488	1.17174	0.75222-1.82523	0.0116	0.75175	0.004	61.1647	33	0.00205	60.9707	32	0.00151
GCST90274813	21	0.619	0.76853	0.27715-2.1311	0.917	1.02914	0.60028-1.76440	0.908	1.02401	0.68534-1.53004	0.656	0.79279	0.28958-2.17042	0.285	1.74913	0.64441-4.74774	0.02878	0.55558	0.965	9.84389	20	0.97092	9.48387	19	0.96455
GCST90274846	39	0.868	0.94944	0.51813-1.7398	0.762	1.07587	0.66962-1.72858	0.908	1.01686	0.76649-1.34900	0.693	0.8313	0.33446-2.06621	0.966	1.01299	0.56447-1.81789	0.0074	0.80318	0.647	34.3765	38	0.63775	34.3135	37	0.59566
GCST90274838	27	0.426	0.68663	0.27596-1.7084	0.585	0.86145	0.50442-1.47118	0.916	0.97933	0.66502-1.44220	0.873	0.91458	0.30954-2.70222	0.705	0.84371	0.35309-2.01608	0.03735	0.40705	0.763	21.0241	26	0.74072	20.3129	25	0.73023
GCST90274807	24	0.834	0.90186	0.34696-2.3442	0.52	1.21674	0.66970-2.21060	0.937	0.98244	0.63356-1.52345	0.345	1.71562	0.57207-5.14508	0.376	1.66505	0.55022-5.03869	0.01156	0.84422	0.216	28.0783	23	0.21284	28.0279	22	0.17476
GCST90274777	514	0.986	0.99819	0.81965-1.2156	0.216	1.16303	0.91565-1.47724	0.939	0.99551	0.88798-1.11606	0.2	0.62055	0.29930-1.28662	0.282	1.1541	0.88904-1.49820	-0.00025	0.97386	0.07	561.793	513	0.06705	561.792	512	0.06314
GCST90274806	19	0.187	0.45253	0.14605-1.4022	0.931	0.97316	0.52561-1.80179	0.962	1.01107	0.64212-1.59201	0.987	1.00962	0.32702-3.11706	0.737	0.83428	0.29415-2.36621	0.08581	0.14659	0.651	15.2338	18	0.64586	12.9197	17	0.74155
GCST90274801	21	0.801	0.88176	0.33639-2.3113	0.787	0.92388	0.51979-1.64209	0.977	1.00626	0.66300-1.52724	0.924	0.94909	0.32783-2.74771	0.834	0.89446	0.31857-2.51143	0.01476	0.76893	0.863	13.8778	20	0.83664	13.7889	19	0.79585
GCST90274770	29	0.431	1.13249	0.83453-1.5368	0.676	1.06315	0.79779-1.41677	0.982	1.0025	0.80873-1.24268	0.452	1.28384	0.67601-2.43821	0.575	1.07811	0.83140-1.39803	-0.03056	0.28047	0.817	21.7569	28	0.79242	20.5439	27	0.80717
GCST90274823	26	0.965	0.98302	0.46045-2.0987	0.593	1.14619	0.69476-1.89095	0.987	1.00277	0.72226-1.39224	0.546	1.28385	0.57722-2.85556	0.579	1.19945	0.63593-2.26234	0.00256	0.95499	0.715	20.9522	25	0.69527	20.949	24	0.64173
