# Supplementary material
Source: Frontiers journal article supplement (https://www.frontiersin.org/articles/1413183)
Supplement: Table_4.xlsx [file Table_4.xlsx]

## Sheet: Content
Table of Contents
S4.1 The IVs SNPs involved in immune cells phenotypes to abdominal aortic aneuryme (AAA) of FinnGen database.
S4.2 The IVs SNPs involved in immune cells phenotypes to AAA of UK Biobank database.
S4.3 The single SNP's effect estimated in immune cells phenotypes to AAA of FinnGen database.
S4.4 The single SNP's effect estimated in immune cells phenotypes to AAA of UK Biobank database.

## Sheet: S4.1
The IVs SNPs involved in immune cells phenotypes to abdominal aortic aneuryme (AAA) of FinnGen database.
id	SNP	effect_allele.exposure	other_allele.exposure	effect_allele.outcome	other_allele.outcome	beta.exposure	beta.outcome	eaf.exposure	eaf.outcome	remove	palindromic	ambiguous	id.outcome	pos.outcome	pval.outcome	se.outcome	mr_keep.outcome	pval_origin.outcome	data_source.outcome	chromosome	base_pair_location	se.exposure	pval.exposure	samplesize.exposure	expsure	mr_keep.exposure	pval_origin.exposure	data_source.exposure	mr_keep	R2	f	meanf
GCST90274758	rs1034059	A	G	A	G	0.066	-0.0148641	0.6982	0.298339	FALSE	FALSE	FALSE	CffBSP	157772666	0.5732	0.0263854	TRUE	reported	textfile	6	158193698	0.0146	6.17e-06	14288	GCST90274758.txt	TRUE	reported	textfile	TRUE	0.0014282	20.4325	28.746
	rs10513018	A	G	A	G	-0.0875	-0.0326488	0.8986	0.0886074	FALSE	FALSE	FALSE	CffBSP	136955626	0.436228	0.0419339	TRUE	reported	textfile	3	136674468	0.0197	8.93e-06	14288	GCST90274758.txt	TRUE	reported	textfile	TRUE	0.00137884	19.7253	28.746
	rs10792025	T	C	T	C	-0.0593	0.000851004	0.3383	0.675896	FALSE	FALSE	FALSE	CffBSP	69153743	0.973021	0.025163	TRUE	reported	textfile	11	68921211	0.0124	1.73e-06	14727	GCST90274758.txt	TRUE	reported	textfile	TRUE	0.00155052	22.8669	28.746
	rs10926313	A	G	A	G	-0.0884	-0.0194691	0.8334	0.204801	FALSE	FALSE	FALSE	CffBSP	240641210	0.511531	0.0296579	TRUE	reported	textfile	1	240804510	0.0175	4.39e-07	14288	GCST90274758.txt	TRUE	reported	textfile	TRUE	0.00178272	25.5134	28.746
	rs112020430	T	C	T	C	0.1784	-0.103929	0.0251	0.981751	FALSE	FALSE	FALSE	CffBSP	116663268	0.239248	0.0883102	TRUE	reported	textfile	4	117584424	0.0403	9.56e-06	14735	GCST90274758.txt	TRUE	reported	textfile	TRUE	0.00132817	19.5939	28.746
	rs137887001	C	G	C	G	0.2235	0.0533763	0.9827	0.985596	FALSE	TRUE	FALSE	CffBSP	45938222	0.580874	0.0966772	TRUE	reported	textfile	20	44566861	0.0486	4.25e-06	14288	GCST90274758.txt	TRUE	reported	textfile	TRUE	0.00147798	21.1457	28.746
	rs139951113	T	C	T	C	0.3201	0.356091	0.0087	0.996763	FALSE	FALSE	FALSE	CffBSP	6024779	0.065307	0.193197	TRUE	reported	textfile	3	6066466	0.0722	9.27e-06	12935	GCST90274758.txt	TRUE	reported	textfile	TRUE	0.0015173	19.653	28.746
	rs181095999	T	C	T	C	-0.2226	0.0692394	0.0227	0.983549	FALSE	FALSE	FALSE	CffBSP	23770232	0.460381	0.0937922	TRUE	reported	textfile	12	23923166	0.0474	2.65e-06	14736	GCST90274758.txt	TRUE	reported	textfile	TRUE	0.00149439	22.0513	28.746
	rs2731672	T	C	T	C	0.0926	-0.0136312	0.2679	0.740272	FALSE	FALSE	FALSE	CffBSP	177415473	0.614012	0.027027	TRUE	reported	textfile	5	176842474	0.0152	1.11e-09	11783	GCST90274758.txt	TRUE	reported	textfile	TRUE	0.00313988	37.1074	28.746
	rs2856226	T	C	T	C	-0.0995	0.0121107	0.8975	0.072189	FALSE	FALSE	FALSE	CffBSP	15567100	0.788557	0.0451582	TRUE	reported	textfile	17	15470414	0.0214	3.33e-06	12404	GCST90274758.txt	TRUE	reported	textfile	TRUE	0.00173981	21.6147	28.746
	rs356283	T	G	T	G	0.0588	-0.00365905	0.6475	0.255434	FALSE	FALSE	FALSE	CffBSP	80509505	0.891501	0.0268249	TRUE	reported	textfile	1	80975190	0.0123	1.75e-06	14730	GCST90274758.txt	TRUE	reported	textfile	TRUE	0.00154906	22.85	28.746
	rs3733402	A	G	A	G	-0.1305	0.0300045	0.5102	0.42487	FALSE	FALSE	FALSE	CffBSP	186236880	0.20638	0.0237456	TRUE	reported	textfile	4	187158034	0.0116	2.32e-29	14736	GCST90274758.txt	TRUE	reported	textfile	TRUE	0.00851552	126.545	28.746
	rs5030072	T	C	T	C	0.0594	0.0271172	0.5711	0.409797	FALSE	FALSE	FALSE	CffBSP	186737757	0.25646	0.023896	TRUE	reported	textfile	3	186455546	0.0119	5.99e-07	14716	GCST90274758.txt	TRUE	reported	textfile	TRUE	0.00169026	24.9127	28.746
	rs60037565	A	T	A	T	0.0772	-0.0552652	0.8011	0.734343	FALSE	TRUE	FALSE	CffBSP	76622198	0.0380084	0.0266368	TRUE	reported	textfile	17	74618280	0.0172	7.18e-06	11337	GCST90274758.txt	TRUE	reported	textfile	TRUE	0.00177382	20.1419	28.746
	rs6963617	T	C	T	C	0.0754	-0.019847	0.2938	0.713703	FALSE	FALSE	FALSE	CffBSP	17554690	0.469003	0.0274092	TRUE	reported	textfile	7	17594314	0.0142	1.1e-07	14288	GCST90274758.txt	TRUE	reported	textfile	TRUE	0.00196942	28.1907	28.746
	rs7490744	T	G	T	G	0.0705	0.00193721	0.2217	0.743112	FALSE	FALSE	FALSE	CffBSP	84402834	0.943157	0.0271691	TRUE	reported	textfile	13	84976969	0.0159	9.25e-06	11783	GCST90274758.txt	TRUE	reported	textfile	TRUE	0.00166573	19.6567	28.746
	rs76686678	T	G	T	G	0.2607	-0.0634809	0.015	0.975472	FALSE	FALSE	FALSE	CffBSP	37971763	0.40276	0.0758703	TRUE	reported	textfile	2	38198906	0.0521	5.62e-07	14730	GCST90274758.txt	TRUE	reported	textfile	TRUE	0.00169694	25.035	28.746
	rs78948504	C	G	C	G	-0.1269	-0.0344657	0.9352	0.939018	FALSE	TRUE	FALSE	CffBSP	4078648	0.48814	0.0497147	TRUE	reported	textfile	8	3936170	0.0281	6.3e-06	11781	GCST90274758.txt	TRUE	reported	textfile	TRUE	0.00172813	20.3909	28.746
GCST90274759	rs10057228	T	C	T	C	-0.0699	-0.0142421	0.9203	0.0645293	FALSE	FALSE	FALSE	CffBSP	133793429	0.764297	0.0474988	TRUE	reported	textfile	5	133129120	0.0215	0.00115	14734	GCST90274759.txt	TRUE	reported	textfile	TRUE	0.000716878	10.5686	7.50309
	rs10066223	T	C	T	C	-0.0497	0.00856118	0.6027	0.368842	FALSE	FALSE	FALSE	CffBSP	155119487	0.726542	0.0244795	TRUE	reported	textfile	5	154499047	0.0116	1.83e-05	14735	GCST90274759.txt	TRUE	reported	textfile	TRUE	0.00124425	18.3543	7.50309
	rs1009523	T	C	T	C	0.0645	-0.0157146	0.793	0.26149	FALSE	FALSE	FALSE	CffBSP	177230281	0.570357	0.0276897	TRUE	reported	textfile	4	178151435	0.0169	0.000135	11337	GCST90274759.txt	TRUE	reported	textfile	TRUE	0.00128319	14.5636	7.50309
	rs10206264	A	G	A	G	-0.0501	0.0132863	0.1686	0.85105	FALSE	FALSE	FALSE	CffBSP	239806139	0.686779	0.0329496	TRUE	reported	textfile	2	240727833	0.0154	0.00114	14735	GCST90274759.txt	TRUE	reported	textfile	TRUE	0.000717748	10.5822	7.50309
	rs10231627	T	C	T	C	-0.092	-0.0603038	0.9533	0.0349788	FALSE	FALSE	FALSE	CffBSP	20443284	0.350318	0.064567	TRUE	reported	textfile	7	20482907	0.0285	0.00125	14736	GCST90274759.txt	TRUE	reported	textfile	TRUE	0.000706642	10.419	7.50309
	rs10242095	A	G	A	G	-0.0978	-0.00126697	0.9613	0.0482525	FALSE	FALSE	FALSE	CffBSP	24445343	0.981776	0.0554651	TRUE	reported	textfile	7	24484962	0.0302	0.0012	14736	GCST90274759.txt	TRUE	reported	textfile	TRUE	0.000711173	10.4859	7.50309
	rs1039910	T	C	T	C	0.0493	-0.0444538	0.7106	0.285132	FALSE	FALSE	FALSE	CffBSP	8790556	0.0865685	0.0259389	TRUE	reported	textfile	8	8648066	0.0127	0.000104	14736	GCST90274759.txt	TRUE	reported	textfile	TRUE	0.00102156	15.067	7.50309
	rs10490486	A	G	A	G	-0.0727	-0.0726678	0.0841	0.92977	FALSE	FALSE	FALSE	CffBSP	214054387	0.120085	0.0467492	TRUE	reported	textfile	2	214919111	0.0222	0.00106	14736	GCST90274759.txt	TRUE	reported	textfile	TRUE	0.000727223	10.7227	7.50309
	rs10507114	T	C	T	C	0.0539	-0.0600768	0.2123	0.840634	FALSE	FALSE	FALSE	CffBSP	99960789	0.0615772	0.0321381	TRUE	reported	textfile	12	100354567	0.0141	0.000132	14721	GCST90274759.txt	TRUE	reported	textfile	TRUE	0.000991679	14.611	7.50309
	rs10648641	G	GCTC	G	GCTC	-0.0504	0.0215032	0.5426	0.452877	FALSE	FALSE	FALSE	CffBSP	137243653	0.36484	0.0237295	TRUE	reported	textfile	4	138164807	0.0131	0.000119	11320	GCST90274759.txt	TRUE	reported	textfile	TRUE	0.00130588	14.7993	7.50309
	rs10737502	A	G	A	G	-0.0546	0.00520882	0.8699	0.116242	FALSE	FALSE	FALSE	CffBSP	161822531	0.886074	0.0363557	TRUE	reported	textfile	1	161792321	0.0171	0.00141	14724	GCST90274759.txt	TRUE	reported	textfile	TRUE	0.000691937	10.1938	7.50309
	rs10753861	T	C	T	C	0.0413	-0.00575083	0.3299	0.744522	FALSE	FALSE	FALSE	CffBSP	199946597	0.830182	0.0268143	TRUE	reported	textfile	1	199915725	0.0127	0.00115	14288	GCST90274759.txt	TRUE	reported	textfile	TRUE	0.000739605	10.5738	7.50309
	rs10810582	C	G	C	G	-0.0433	0.0078635	0.7433	0.759996	FALSE	TRUE	FALSE	CffBSP	1674073	0.776537	0.0277044	TRUE	reported	textfile	9	1674073	0.0132	0.00104	14721	GCST90274759.txt	TRUE	reported	textfile	TRUE	0.000730421	10.7589	7.50309
	rs10817506	A	G	A	G	-0.0379	-0.023843	0.4297	0.564385	FALSE	FALSE	FALSE	CffBSP	113699381	0.315296	0.0237439	TRUE	reported	textfile	9	116461661	0.0117	0.0012	14727	GCST90274759.txt	TRUE	reported	textfile	TRUE	0.000712005	10.4917	7.50309
	rs10853954	T	C	T	C	0.0501	-0.0557154	0.7945	0.184255	FALSE	FALSE	FALSE	CffBSP	1534043	0.0667329	0.0303881	TRUE	reported	textfile	19	1534042	0.0157	0.00142	13223	GCST90274759.txt	TRUE	reported	textfile	TRUE	0.000769506	10.1815	7.50309
	rs10879072	A	G	A	G	-0.0486	-0.018515	0.2199	0.825596	FALSE	FALSE	FALSE	CffBSP	70013358	0.552342	0.0311566	TRUE	reported	textfile	12	70407138	0.0149	0.00111	12838	GCST90274759.txt	TRUE	reported	textfile	TRUE	0.000828024	10.6373	7.50309
	rs10898157	A	G	A	G	0.0452	0.011216	0.5998	0.287786	FALSE	FALSE	FALSE	CffBSP	83842929	0.665167	0.0259156	TRUE	reported	textfile	11	83553972	0.0118	0.000128	14731	GCST90274759.txt	TRUE	reported	textfile	TRUE	0.000995058	14.6708	7.50309
	rs10904223	A	G	A	G	0.0422	-0.00245658	0.3372	0.696566	FALSE	FALSE	FALSE	CffBSP	4291289	0.923197	0.0254813	TRUE	reported	textfile	10	4333481	0.0129	0.00107	12845	GCST90274759.txt	TRUE	reported	textfile	TRUE	0.000832434	10.6999	7.50309
	rs10917025	A	G	A	G	0.0543	0.00224887	0.2186	0.807932	FALSE	FALSE	FALSE	CffBSP	21626097	0.939777	0.0297666	TRUE	reported	textfile	1	21952590	0.014	0.000105	14735	GCST90274759.txt	TRUE	reported	textfile	TRUE	0.00101988	15.0413	7.50309
	rs10962863	T	C	T	C	-0.0633	0.0295497	0.0996	0.93918	FALSE	FALSE	FALSE	CffBSP	17091003	0.543438	0.0486317	TRUE	reported	textfile	9	17091001	0.0195	0.00117	14714	GCST90274759.txt	TRUE	reported	textfile	TRUE	0.000715643	10.5361	7.50309
	rs10999368	T	C	T	C	-0.0535	-0.0351468	0.7877	0.198547	FALSE	FALSE	FALSE	CffBSP	70519896	0.23087	0.029335	TRUE	reported	textfile	10	72279652	0.0142	0.000165	14729	GCST90274759.txt	TRUE	reported	textfile	TRUE	0.000962807	14.1929	7.50309
	rs10999691	A	C	A	C	0.0531	-0.0291306	0.2687	0.743693	FALSE	FALSE	FALSE	CffBSP	71127445	0.279813	0.0269543	TRUE	reported	textfile	10	72887202	0.0138	0.000119	14287	GCST90274759.txt	TRUE	reported	textfile	TRUE	0.00103524	14.8037	7.50309
	rs11016863	T	G	T	G	-0.0719	0.0374347	0.8819	0.124324	FALSE	FALSE	FALSE	CffBSP	127237920	0.301571	0.0362364	TRUE	reported	textfile	10	129036184	0.0185	0.000102	14288	GCST90274759.txt	TRUE	reported	textfile	TRUE	0.00105605	15.1027	7.50309
	rs11038122	T	C	T	C	0.0901	0.0045364	0.0437	0.968807	FALSE	FALSE	FALSE	CffBSP	44725195	0.945492	0.0663515	TRUE	reported	textfile	11	44746745	0.0283	0.00145	14736	GCST90274759.txt	TRUE	reported	textfile	TRUE	0.000687382	10.1349	7.50309
	rs11067640	A	C	A	C	0.061	0.0742651	0.1065	0.927305	FALSE	FALSE	FALSE	CffBSP	115515022	0.0997884	0.0451217	TRUE	reported	textfile	12	115952827	0.0187	0.00111	14736	GCST90274759.txt	TRUE	reported	textfile	TRUE	0.000721578	10.6394	7.50309
	rs11085907	A	C	A	C	0.0493	0.00109749	0.3112	0.640031	FALSE	FALSE	FALSE	CffBSP	14693699	0.96428	0.0245066	TRUE	reported	textfile	19	14804511	0.0127	0.000104	14288	GCST90274759.txt	TRUE	reported	textfile	TRUE	0.00105355	15.067	7.50309
	rs11103119	A	G	A	G	0.048	-0.00799839	0.3072	0.705443	FALSE	FALSE	FALSE	CffBSP	135636868	0.758261	0.0259886	TRUE	reported	textfile	9	138528714	0.0146	0.00101	11337	GCST90274759.txt	TRUE	reported	textfile	TRUE	0.000952499	10.8069	7.50309
	rs111268081	A	C	A	C	-0.1041	0.0348277	0.0524	0.965451	FALSE	FALSE	FALSE	CffBSP	67610269	0.587299	0.0641684	TRUE	reported	textfile	1	68075952	0.0275	0.000153	14288	GCST90274759.txt	TRUE	reported	textfile	TRUE	0.00100191	14.3277	7.50309
	rs111414677	T	C	T	C	0.1824	0.0398471	0.0191	0.974429	FALSE	FALSE	FALSE	CffBSP	99807226	0.59193	0.0743356	TRUE	reported	textfile	9	102569508	0.0471	0.000108	14720	GCST90274759.txt	TRUE	reported	textfile	TRUE	0.00101779	14.9951	7.50309
	rs111467255	T	C	T	C	-0.1852	0.037847	0.9887	0.0303376	FALSE	FALSE	FALSE	CffBSP	43221238	0.582693	0.068881	TRUE	reported	textfile	10	43716686	0.0568	0.00111	14288	GCST90274759.txt	TRUE	reported	textfile	TRUE	0.000743517	10.6298	7.50309
	rs11164455	C	G	C	G	0.0418	0.0157169	0.4258	0.406916	FALSE	TRUE	TRUE	CffBSP	102308916	0.518912	0.0243665	TRUE	reported	textfile	1	102774472	0.0128	0.00109	12404	GCST90274759.txt	TRUE	reported	textfile	FALSE	0.000859009	10.6626	7.50309
	rs11199205	A	G	A	G	-0.0464	-0.0451299	0.317	0.721227	FALSE	FALSE	FALSE	CffBSP	120191027	0.0850962	0.0262101	TRUE	reported	textfile	10	121950539	0.0123	0.000162	14730	GCST90274759.txt	TRUE	reported	textfile	TRUE	0.00096517	14.2288	7.50309
	rs112041471	T	C	T	C	-0.095	-0.016434	0.0432	0.946123	FALSE	FALSE	FALSE	CffBSP	153576247	0.751479	0.0518929	TRUE	reported	textfile	7	153273332	0.0289	0.00101	14732	GCST90274759.txt	TRUE	reported	textfile	TRUE	0.000732945	10.8042	7.50309
	rs112695320	T	C	T	C	0.2027	-0.00335731	0.0131	0.995505	FALSE	FALSE	FALSE	CffBSP	15700018	0.98519	0.180861	TRUE	reported	textfile	2	15840142	0.0543	0.000189	13801	GCST90274759.txt	TRUE	reported	textfile	TRUE	0.00100869	13.933	7.50309
	rs112737152	A	C	A	C	-0.1386	0.0807285	0.9791	0.0145716	FALSE	FALSE	FALSE	CffBSP	123883210	0.405055	0.0969562	TRUE	reported	textfile	6	124204355	0.0423	0.00105	14730	GCST90274759.txt	TRUE	reported	textfile	TRUE	0.000728327	10.7346	7.50309
	rs112741428	C	G	C	G	0.0545	-0.0546894	0.2263	0.243625	FALSE	TRUE	FALSE	CffBSP	22893336	0.047265	0.0275664	TRUE	reported	textfile	6	22893565	0.0141	0.000111	14287	GCST90274759.txt	TRUE	reported	textfile	TRUE	0.00104462	14.9381	7.50309
	rs112823895	T	G	T	G	0.1323	0.0383895	0.0243	0.967036	FALSE	FALSE	FALSE	CffBSP	191966350	0.563308	0.0664252	TRUE	reported	textfile	2	192831076	0.0407	0.00115	14735	GCST90274759.txt	TRUE	reported	textfile	TRUE	0.000716588	10.5651	7.50309
	rs112849285	A	G	A	G	0.1194	-0.117414	0.0506	0.922133	FALSE	FALSE	FALSE	CffBSP	98697355	0.0061197	0.0428316	TRUE	reported	textfile	4	99618506	0.0315	0.00015	14288	GCST90274759.txt	TRUE	reported	textfile	TRUE	0.00100457	14.3657	7.50309
	rs11295863	CG	C	CG	C	-0.0715	-0.0367519	0.7752	0.312749	FALSE	FALSE	FALSE	CffBSP	68214842	0.146734	0.0253258	TRUE	reported	textfile	10	69974599	0.0184	0.000102	10894	GCST90274759.txt	TRUE	reported	textfile	TRUE	0.00138416	15.0972	7.50309
	rs113061073	T	C	T	C	0.2412	0.26876	0.9902	0.00200373	FALSE	FALSE	FALSE	CffBSP	10842488	0.272324	0.244833	TRUE	reported	textfile	2	10982614	0.0739	0.0011	10795	GCST90274759.txt	TRUE	reported	textfile	TRUE	0.000985859	10.6509	7.50309
	rs113080423	T	C	T	C	0.147	0.0462775	0.024	0.983272	FALSE	FALSE	FALSE	CffBSP	76597859	0.624505	0.094545	TRUE	reported	textfile	7	76227176	0.0447	0.00101	14288	GCST90274759.txt	TRUE	reported	textfile	TRUE	0.000756344	10.8133	7.50309
	rs113115617	A	C	A	C	0.1771	-0.160136	0.0207	0.978317	FALSE	FALSE	FALSE	CffBSP	98722240	0.0423653	0.0788877	TRUE	reported	textfile	14	99188577	0.0473	0.000181	14735	GCST90274759.txt	TRUE	reported	textfile	TRUE	0.000950499	14.017	7.50309
	rs113162257	C	G	C	G	0.161	0.0485493	0.967	0.974703	FALSE	TRUE	FALSE	CffBSP	93822435	0.518534	0.0751994	TRUE	reported	textfile	7	93451747	0.0432	0.000194	14288	GCST90274759.txt	TRUE	reported	textfile	TRUE	0.00097116	13.8875	7.50309
	rs113472546	A	T	A	T	-0.2642	0.371274	0.9925	0.998252	FALSE	TRUE	FALSE	CffBSP	36174587	0.178373	0.275879	TRUE	reported	textfile	22	36570635	0.0804	0.00102	13801	GCST90274759.txt	TRUE	reported	textfile	TRUE	0.000781814	10.7967	7.50309
	rs113603284	A	G	A	G	-0.1297	-0.127748	0.0299	0.989513	FALSE	FALSE	FALSE	CffBSP	57221315	0.25676	0.112645	TRUE	reported	textfile	1	57686988	0.0342	0.000149	14733	GCST90274759.txt	TRUE	reported	textfile	TRUE	0.000975243	14.3803	7.50309
	rs113792820	A	G	A	G	-0.0452	0.0520231	0.2184	0.794489	FALSE	FALSE	FALSE	CffBSP	54555603	0.0748101	0.0291998	TRUE	reported	textfile	5	53851433	0.0139	0.00115	14733	GCST90274759.txt	TRUE	reported	textfile	TRUE	0.000717207	10.5728	7.50309
	rs113800998	A	C	A	C	0.1019	0.0383689	0.0364	0.976334	FALSE	FALSE	FALSE	CffBSP	218098258	0.629853	0.0796145	TRUE	reported	textfile	2	218962981	0.0315	0.00122	14735	GCST90274759.txt	TRUE	reported	textfile	TRUE	0.00070969	10.4633	7.50309
	rs113935313	CT	C	CT	C	0.0466	0.023216	0.6869	0.333577	FALSE	FALSE	FALSE	CffBSP	80913910	0.354639	0.0250813	TRUE	reported	textfile	11	80624953	0.0147	0.00152	10894	GCST90274759.txt	TRUE	reported	textfile	TRUE	0.000921615	10.0475	7.50309
	rs113991114	C	G	C	G	0.2312	0.139825	0.0121	0.0152314	FALSE	TRUE	FALSE	CffBSP	116645470	0.145777	0.0961251	TRUE	reported	textfile	4	117566626	0.0597	0.000108	13801	GCST90274759.txt	TRUE	reported	textfile	TRUE	0.00108554	14.9956	7.50309
	rs114111976	A	G	A	G	0.1845	-0.00469327	0.0139	0.992836	FALSE	FALSE	FALSE	CffBSP	28542081	0.972785	0.137569	TRUE	reported	textfile	14	29011287	0.0561	0.00101	13422	GCST90274759.txt	TRUE	reported	textfile	TRUE	0.000805193	10.8144	7.50309
	rs114279768	A	G	A	G	-0.1585	0.0236655	0.027	0.952003	FALSE	FALSE	FALSE	CffBSP	137941866	0.666779	0.054963	TRUE	reported	textfile	5	137277555	0.0415	0.000134	14713	GCST90274759.txt	TRUE	reported	textfile	TRUE	0.000990446	14.5849	7.50309
	rs114636355	A	C	A	C	-0.1876	0.157859	0.0164	0.992379	FALSE	FALSE	FALSE	CffBSP	59027014	0.239095	0.134091	TRUE	reported	textfile	14	59493732	0.0485	0.00011	14249	GCST90274759.txt	TRUE	reported	textfile	TRUE	0.00104892	14.9596	7.50309
	rs114750327	A	G	A	G	0.2365	-0.153007	0.0106	0.997366	FALSE	FALSE	FALSE	CffBSP	140715215	0.506882	0.230536	TRUE	reported	textfile	3	140434057	0.072	0.00102	12635	GCST90274759.txt	TRUE	reported	textfile	TRUE	0.000853201	10.7877	7.50309
	rs114793288	T	C	T	C	-0.2197	-0.13872	0.011	0.998322	FALSE	FALSE	FALSE	CffBSP	69463790	0.629245	0.28733	TRUE	reported	textfile	1	69929473	0.0675	0.00113	12935	GCST90274759.txt	TRUE	reported	textfile	TRUE	0.000818334	10.5922	7.50309
	rs11483358	A	ATTT	T	TA	0.0663	-0.103926	0.7532	0.0352908	TRUE	FALSE	FALSE	CffBSP	16028385	0.10978	0.0649867	TRUE	reported	textfile	20	16009030	0.0176	0.000165	10894	GCST90274759.txt	TRUE	reported	textfile	FALSE	0.00130092	14.188	7.50309
	rs114852526	A	G	A	G	-0.1688	0.0166115	0.0144	0.988963	FALSE	FALSE	FALSE	CffBSP	22618891	0.879755	0.109806	TRUE	reported	textfile	1	22945384	0.0529	0.00142	14244	GCST90274759.txt	TRUE	reported	textfile	TRUE	0.000714317	10.1806	7.50309
	rs11506725	A	G	A	G	0.048	0.0324676	0.5174	0.396745	FALSE	FALSE	FALSE	CffBSP	8005711	0.179765	0.0242029	TRUE	reported	textfile	9	8005711	0.0129	0.000198	12404	GCST90274759.txt	TRUE	reported	textfile	TRUE	0.00111495	13.8431	7.50309
	rs115100655	A	G	A	G	0.0429	-0.0104875	0.2626	0.798954	FALSE	FALSE	FALSE	CffBSP	73107129	0.719444	0.0291966	TRUE	reported	textfile	16	73141028	0.0131	0.00106	14714	GCST90274759.txt	TRUE	reported	textfile	TRUE	0.000728324	10.7229	7.50309
	rs115111764	T	C	T	C	-0.1093	-0.0496855	0.9654	0.0434397	FALSE	FALSE	FALSE	CffBSP	196794099	0.391776	0.0580166	TRUE	reported	textfile	2	197658823	0.034	0.00131	14723	GCST90274759.txt	TRUE	reported	textfile	TRUE	0.000701425	10.3329	7.50309
	rs115251488	A	T	A	T	0.07	0.0233107	0.9197	0.942878	FALSE	TRUE	FALSE	CffBSP	116962218	0.646848	0.0508804	TRUE	reported	textfile	4	117883374	0.0213	0.00101	14728	GCST90274759.txt	TRUE	reported	textfile	TRUE	0.000732782	10.7989	7.50309
	rs115305466	A	T	A	T	-0.0775	0.058342	0.0627	0.0524569	FALSE	TRUE	FALSE	CffBSP	44215222	0.259946	0.0517896	TRUE	reported	textfile	10	44710670	0.0236	0.00102	14734	GCST90274759.txt	TRUE	reported	textfile	TRUE	0.000731376	10.7825	7.50309
	rs115404303	T	C	T	C	-0.2306	0.191421	0.0089	0.997213	FALSE	FALSE	FALSE	CffBSP	7224733	0.391489	0.223383	TRUE	reported	textfile	3	7266420	0.0707	0.00111	14288	GCST90274759.txt	TRUE	reported	textfile	TRUE	0.000744021	10.637	7.50309
	rs115424767	T	G	T	G	-0.0834	0.040506	0.9454	0.0847767	FALSE	FALSE	FALSE	CffBSP	55483282	0.338115	0.0422864	TRUE	reported	textfile	6	55348080	0.0257	0.00117	14732	GCST90274759.txt	TRUE	reported	textfile	TRUE	0.000714322	10.5295	7.50309
	rs11589456	A	G	A	G	-0.1306	0.0039636	0.0328	0.97978	FALSE	FALSE	FALSE	CffBSP	31690116	0.962234	0.0837068	TRUE	reported	textfile	1	32155717	0.0345	0.000153	13672	GCST90274759.txt	TRUE	reported	textfile	TRUE	0.00104703	14.328	7.50309
	rs115907846	A	G	A	G	0.19	0.0564664	0.9882	0.0229365	FALSE	FALSE	FALSE	CffBSP	14286089	0.473464	0.0787697	TRUE	reported	textfile	5	14286198	0.0582	0.0011	14736	GCST90274759.txt	TRUE	reported	textfile	TRUE	0.000722716	10.6562	7.50309
	rs11607671	T	C	T	C	0.0569	-0.0343643	0.199	0.80771	FALSE	FALSE	FALSE	CffBSP	72481694	0.250126	0.0298809	TRUE	reported	textfile	11	72192738	0.015	0.000149	13240	GCST90274759.txt	TRUE	reported	textfile	TRUE	0.00108563	14.3872	7.50309
	rs116100748	A	G	A	G	-0.2309	0.083934	0.9893	0.00792877	FALSE	FALSE	FALSE	CffBSP	235475817	0.516418	0.129353	TRUE	reported	textfile	1	235639133	0.0725	0.00145	13801	GCST90274759.txt	TRUE	reported	textfile	TRUE	0.000734416	10.1417	7.50309
	rs11616270	T	C	T	C	-0.0496	0.0566826	0.1933	0.86838	FALSE	FALSE	FALSE	CffBSP	42978408	0.101739	0.034637	TRUE	reported	textfile	13	43552544	0.0153	0.00119	14288	GCST90274759.txt	TRUE	reported	textfile	TRUE	0.000735004	10.508	7.50309
	rs11631531	A	C	A	C	-0.039	-0.0076973	0.5646	0.429316	FALSE	FALSE	FALSE	CffBSP	88321102	0.746296	0.0237918	TRUE	reported	textfile	15	88864333	0.0119	0.00105	14723	GCST90274759.txt	TRUE	reported	textfile	TRUE	0.000728991	10.7393	7.50309
	rs116349319	A	G	A	G	-0.2369	0.104575	0.0099	0.973337	FALSE	FALSE	FALSE	CffBSP	73670400	0.16069	0.0745496	TRUE	reported	textfile	4	74536117	0.0741	0.00139	13801	GCST90274759.txt	TRUE	reported	textfile	TRUE	0.000740051	10.2195	7.50309
	rs116407667	A	G	A	G	-0.1363	-0.0497443	0.023	0.986653	FALSE	FALSE	FALSE	CffBSP	52046254	0.618922	0.100013	TRUE	reported	textfile	2	52273392	0.0417	0.00108	14729	GCST90274759.txt	TRUE	reported	textfile	TRUE	0.000724822	10.6822	7.50309
	rs116461870	A	T	A	T	0.1102	-0.08258	0.9539	0.965867	FALSE	TRUE	FALSE	CffBSP	13307306	0.199986	0.0644355	TRUE	reported	textfile	5	13307418	0.0292	0.000161	14727	GCST90274759.txt	TRUE	reported	textfile	TRUE	0.000966192	14.2409	7.50309
	rs116491682	A	G	A	G	-0.1805	0.105653	0.0144	0.959081	FALSE	FALSE	FALSE	CffBSP	21280589	0.0806919	0.0604876	TRUE	reported	textfile	6	21280820	0.056	0.00127	14288	GCST90274759.txt	TRUE	reported	textfile	TRUE	0.000726593	10.3877	7.50309
	rs11650975	T	C	T	C	0.0454	0.0255923	0.238	0.760204	FALSE	FALSE	FALSE	CffBSP	49268201	0.351743	0.0274828	TRUE	reported	textfile	17	47345563	0.0139	0.00109	14287	GCST90274759.txt	TRUE	reported	textfile	TRUE	0.000746134	10.6665	7.50309
	rs116517469	C	G	C	G	0.1809	-0.0507033	0.0241	0.0308953	FALSE	TRUE	FALSE	CffBSP	178503837	0.457303	0.0682142	TRUE	reported	textfile	3	178221625	0.0484	0.000186	13801	GCST90274759.txt	TRUE	reported	textfile	TRUE	0.0010112	13.9677	7.50309
	rs11654526	T	C	T	C	0.0499	-0.0277157	0.1642	0.839871	FALSE	FALSE	FALSE	CffBSP	17713995	0.389228	0.0321894	TRUE	reported	textfile	17	17617309	0.0156	0.00138	14736	GCST90274759.txt	TRUE	reported	textfile	TRUE	0.000693858	10.2304	7.50309
	rs116597622	A	C	A	C	0.1607	0.0913933	0.0198	0.989875	FALSE	FALSE	FALSE	CffBSP	134025257	0.430891	0.11603	TRUE	reported	textfile	8	135037500	0.0424	0.000151	14246	GCST90274759.txt	TRUE	reported	textfile	TRUE	0.00100732	14.3628	7.50309
	rs116672521	T	C	T	C	-0.1183	0.0956603	0.0256	0.973446	FALSE	FALSE	FALSE	CffBSP	162615630	0.193113	0.0735042	TRUE	reported	textfile	4	163536782	0.0372	0.00147	14734	GCST90274759.txt	TRUE	reported	textfile	TRUE	0.000685907	10.1117	7.50309
	rs11672371	C	G	C	G	-0.0884	0.0713512	0.0565	0.0819005	FALSE	TRUE	FALSE	CffBSP	11731810	0.0986098	0.0432004	TRUE	reported	textfile	19	11842625	0.0269	0.00102	14718	GCST90274759.txt	TRUE	reported	textfile	TRUE	0.000733217	10.7979	7.50309
	rs116729634	T	G	T	G	-0.1261	-0.0146413	0.9541	0.0660296	FALSE	FALSE	FALSE	CffBSP	56857506	0.757965	0.0475129	TRUE	reported	textfile	1	57323179	0.0294	1.79e-05	14714	GCST90274759.txt	TRUE	reported	textfile	TRUE	0.00124871	18.394	7.50309
	rs116790313	T	C	T	C	-0.3203	-0.0854974	0.0094	0.997379	FALSE	FALSE	FALSE	CffBSP	76848459	0.721569	0.239917	TRUE	reported	textfile	4	77769612	0.1	0.00136	7808	GCST90274759.txt	TRUE	reported	textfile	TRUE	0.00131221	10.2566	7.50309
	rs116874737	A	C	A	C	-0.2393	-0.0936124	0.9875	0.0029323	FALSE	FALSE	FALSE	CffBSP	64355429	0.64672	0.20425	TRUE	reported	textfile	8	65267986	0.0634	0.00016	13801	GCST90274759.txt	TRUE	reported	textfile	TRUE	0.00103121	14.2444	7.50309
	rs116888956	A	G	A	G	0.1613	-0.127371	0.0235	0.983503	FALSE	FALSE	FALSE	CffBSP	81429479	0.173399	0.0935617	TRUE	reported	textfile	14	81895823	0.0415	0.000102	14725	GCST90274759.txt	TRUE	reported	textfile	TRUE	0.00102488	15.1048	7.50309
	rs116924036	A	G	A	G	0.1403	0.105074	0.0228	0.968197	FALSE	FALSE	FALSE	CffBSP	76567285	0.11951	0.0674918	TRUE	reported	textfile	6	77277002	0.0442	0.0015	14719	GCST90274759.txt	TRUE	reported	textfile	TRUE	0.000684062	10.0742	7.50309
	rs116949391	T	C	T	C	-0.2513	-0.0590057	0.9865	0.00600393	FALSE	FALSE	FALSE	CffBSP	2266465	0.70916	0.158199	TRUE	reported	textfile	18	2266465	0.0571	1.08e-05	13870	GCST90274759.txt	TRUE	reported	textfile	TRUE	0.00139454	19.3665	7.50309
	rs117031857	A	G	A	G	-0.1059	-0.0466688	0.0497	0.932248	FALSE	FALSE	FALSE	CffBSP	79647262	0.325672	0.0474822	TRUE	reported	textfile	6	80356979	0.028	0.000155	14288	GCST90274759.txt	TRUE	reported	textfile	TRUE	0.00100016	14.3026	7.50309
	rs117084494	A	G	A	G	0.2423	0.0646542	0.0118	0.991647	FALSE	FALSE	FALSE	CffBSP	57179994	0.626907	0.13301	TRUE	reported	textfile	11	56947468	0.0633	0.000129	13801	GCST90274759.txt	TRUE	reported	textfile	TRUE	0.00106054	14.65	7.50309
	rs11711489	A	T	A	T	-0.0542	-0.00882044	0.7653	0.75416	FALSE	TRUE	FALSE	CffBSP	21747937	0.748164	0.0274728	TRUE	reported	textfile	3	21789429	0.014	0.000108	14730	GCST90274759.txt	TRUE	reported	textfile	TRUE	0.00101648	14.9859	7.50309
	rs117129821	A	G	A	G	0.1874	0.292674	0.0121	0.997374	FALSE	FALSE	FALSE	CffBSP	96782416	0.20193	0.229356	TRUE	reported	textfile	6	97230292	0.0583	0.00131	13801	GCST90274759.txt	TRUE	reported	textfile	TRUE	0.000748112	10.3309	7.50309
	rs117144813	T	C	T	C	0.0876	-0.0170312	0.0613	0.964941	FALSE	FALSE	FALSE	CffBSP	26199971	0.788551	0.0635041	TRUE	reported	textfile	16	26211292	0.0269	0.00113	14288	GCST90274759.txt	TRUE	reported	textfile	TRUE	0.000741669	10.6033	7.50309
	rs117165881	A	C	A	C	-0.1179	0.0240691	0.972	0.0404648	FALSE	FALSE	FALSE	CffBSP	92167416	0.691419	0.0606382	TRUE	reported	textfile	13	92819669	0.037	0.00144	14733	GCST90274759.txt	TRUE	reported	textfile	TRUE	0.000688706	10.1523	7.50309
	rs117228092	A	G	A	G	0.1227	0.00128469	0.0253	0.984945	FALSE	FALSE	FALSE	CffBSP	89534783	0.989527	0.0978674	TRUE	reported	textfile	9	92149698	0.0387	0.00152	14736	GCST90274759.txt	TRUE	reported	textfile	TRUE	0.000681697	10.051	7.50309
	rs117228714	A	G	A	G	0.1139	-0.0346993	0.0342	0.979363	FALSE	FALSE	FALSE	CffBSP	23030684	0.66775	0.0808393	TRUE	reported	textfile	15	22842384	0.0347	0.00103	14735	GCST90274759.txt	TRUE	reported	textfile	TRUE	0.000730669	10.7728	7.50309
	rs117301421	T	C	T	C	0.2333	0.370836	0.0122	0.999121	FALSE	FALSE	FALSE	CffBSP	59142584	0.381346	0.42361	TRUE	reported	textfile	15	59434783	0.0714	0.00108	12058	GCST90274759.txt	TRUE	reported	textfile	TRUE	0.000884654	10.6748	7.50309
	rs11731710	A	G	A	G	0.0556	0.0225956	0.8535	0.151561	FALSE	FALSE	FALSE	CffBSP	172858737	0.495766	0.033172	TRUE	reported	textfile	4	173779888	0.0172	0.00123	14288	GCST90274759.txt	TRUE	reported	textfile	TRUE	0.000730809	10.448	7.50309
	rs117335967	T	C	T	C	-0.1543	-0.00239746	0.9475	0.0783187	FALSE	FALSE	FALSE	CffBSP	52868227	0.956817	0.0442756	TRUE	reported	textfile	15	53160424	0.0412	0.00018	14288	GCST90274759.txt	TRUE	reported	textfile	TRUE	0.000980708	14.0242	7.50309
	rs11741356	T	C	T	C	0.0485	0.00705389	0.6675	0.378346	FALSE	FALSE	FALSE	CffBSP	53918115	0.772871	0.0244399	TRUE	reported	textfile	5	53213945	0.0127	0.000134	14288	GCST90274759.txt	TRUE	reported	textfile	TRUE	0.00101967	14.5819	7.50309
	rs117461499	A	C	A	C	-0.1672	-0.00369159	0.0272	0.947695	FALSE	FALSE	FALSE	CffBSP	3107802	0.945432	0.0539362	TRUE	reported	textfile	18	3107800	0.0436	0.000126	14728	GCST90274759.txt	TRUE	reported	textfile	TRUE	0.000997522	14.7042	7.50309
	rs117578248	C	G	C	G	0.1069	0.101263	0.9616	0.974252	FALSE	TRUE	FALSE	CffBSP	68675746	0.190724	0.0773922	TRUE	reported	textfile	7	68140733	0.0332	0.00128	14726	GCST90274759.txt	TRUE	reported	textfile	TRUE	0.00070354	10.3662	7.50309
	rs117598911	T	C	T	C	0.1591	-0.00866016	0.0212	0.97882	FALSE	FALSE	FALSE	CffBSP	23388386	0.916691	0.0827911	TRUE	reported	textfile	18	20968350	0.0415	0.000126	14249	GCST90274759.txt	TRUE	reported	textfile	TRUE	0.00103041	14.6955	7.50309
	rs11772876	A	G	A	G	0.0508	0.00350345	0.2688	0.730455	FALSE	FALSE	FALSE	CffBSP	135346953	0.895295	0.0266205	TRUE	reported	textfile	7	135031705	0.0134	0.00015	14287	GCST90274759.txt	TRUE	reported	textfile	TRUE	0.00100494	14.37	7.50309
	rs11776755	T	C	T	C	-0.0723	-0.0378179	0.9032	0.0730454	FALSE	FALSE	FALSE	CffBSP	4072507	0.406216	0.0455324	TRUE	reported	textfile	8	3930029	0.022	0.00101	11785	GCST90274759.txt	TRUE	reported	textfile	TRUE	0.000915596	10.7984	7.50309
	rs11779313	T	C	T	C	0.0468	0.0240674	0.4072	0.593728	FALSE	FALSE	FALSE	CffBSP	39929326	0.314784	0.023942	TRUE	reported	textfile	8	39786845	0.0121	0.00011	14288	GCST90274759.txt	TRUE	reported	textfile	TRUE	0.00104591	14.9575	7.50309
	rs11780884	A	G	A	G	-0.0559	-0.0375512	0.1886	0.776084	FALSE	FALSE	FALSE	CffBSP	18388543	0.181869	0.0281277	TRUE	reported	textfile	8	18246053	0.0147	0.000143	14735	GCST90274759.txt	TRUE	reported	textfile	TRUE	0.000980421	14.4587	7.50309
	rs117834154	T	C	T	C	0.0958	-0.000409481	0.0492	0.894434	FALSE	FALSE	FALSE	CffBSP	66928184	0.991635	0.0390551	TRUE	reported	textfile	18	64595421	0.0299	0.00136	14730	GCST90274759.txt	TRUE	reported	textfile	TRUE	0.000696439	10.2643	7.50309
	rs11790220	T	C	T	C	-0.144	-0.00962981	0.9803	0.021325	FALSE	FALSE	FALSE	CffBSP	72235610	0.905502	0.0811179	TRUE	reported	textfile	9	74850526	0.0455	0.00155	14288	GCST90274759.txt	TRUE	reported	textfile	TRUE	0.000700529	10.0148	7.50309
	rs117926682	A	C	A	C	0.0905	0.00829669	0.9217	0.0404368	FALSE	FALSE	FALSE	CffBSP	27084119	0.888776	0.0593244	TRUE	reported	textfile	13	27658256	0.0237	0.000134	14288	GCST90274759.txt	TRUE	reported	textfile	TRUE	0.0010195	14.5794	7.50309
	rs118087287	T	C	T	C	-0.1158	0.0523512	0.04	0.930908	FALSE	FALSE	FALSE	CffBSP	47193574	0.261653	0.0466383	TRUE	reported	textfile	7	47233172	0.031	0.000187	14723	GCST90274759.txt	TRUE	reported	textfile	TRUE	0.000946861	13.9519	7.50309
	rs118143602	T	C	T	C	-0.1416	0.0486357	0.0272	0.955046	FALSE	FALSE	FALSE	CffBSP	37709840	0.406185	0.0585531	TRUE	reported	textfile	17	36069848	0.0447	0.00154	14722	GCST90274759.txt	TRUE	reported	textfile	TRUE	0.000681159	10.0335	7.50309
	rs11867266	A	G	A	G	0.0724	0.0425574	0.1343	0.850714	FALSE	FALSE	FALSE	CffBSP	12217967	0.199001	0.0331341	TRUE	reported	textfile	17	12121284	0.0187	0.000108	13226	GCST90274759.txt	TRUE	reported	textfile	TRUE	0.00113207	14.9875	7.50309
	rs11867848	A	G	A	G	0.0644	0.130415	0.103	0.953388	FALSE	FALSE	FALSE	CffBSP	16501973	0.0163283	0.0543057	TRUE	reported	textfile	17	16405287	0.02	0.00128	14288	GCST90274759.txt	TRUE	reported	textfile	TRUE	0.000725146	10.3669	7.50309
	rs11948083	T	C	T	C	-0.0945	-0.022616	0.055	0.956558	FALSE	FALSE	FALSE	CffBSP	54650302	0.699568	0.0586052	TRUE	reported	textfile	5	53946131	0.0292	0.00121	14288	GCST90274759.txt	TRUE	reported	textfile	TRUE	0.000732501	10.4722	7.50309
	rs11973904	A	G	A	G	-0.1049	-0.0222925	0.9393	0.02561	FALSE	FALSE	FALSE	CffBSP	150758550	0.764288	0.0743442	TRUE	reported	textfile	7	150455638	0.0277	0.000152	14288	GCST90274759.txt	TRUE	reported	textfile	TRUE	0.00100273	14.3394	7.50309
	rs12212350	T	C	T	C	0.0394	-0.0019342	0.339	0.662222	FALSE	FALSE	FALSE	CffBSP	164284281	0.937881	0.0248188	TRUE	reported	textfile	6	164705314	0.012	0.00103	14736	GCST90274759.txt	TRUE	reported	textfile	TRUE	0.000731026	10.7788	7.50309
	rs12233502	T	G	T	G	0.0382	-0.0457367	0.411	0.589002	FALSE	FALSE	FALSE	CffBSP	140126653	0.0570585	0.0240357	TRUE	reported	textfile	3	139845495	0.0118	0.00121	14724	GCST90274759.txt	TRUE	reported	textfile	TRUE	0.000711259	10.4786	7.50309
	rs12303740	T	G	T	G	0.1662	0.0503575	0.9776	0.00350683	FALSE	FALSE	FALSE	CffBSP	121354262	0.797646	0.196406	TRUE	reported	textfile	12	121792065	0.043	0.000111	13863	GCST90274759.txt	TRUE	reported	textfile	TRUE	0.00107647	14.937	7.50309
	rs12416495	T	C	T	C	-0.1991	-0.284242	0.9778	0.00873037	FALSE	FALSE	FALSE	CffBSP	115634954	0.0232006	0.12521	TRUE	reported	textfile	10	117394464	0.0451	1.01e-05	14288	GCST90274759.txt	TRUE	reported	textfile	TRUE	0.00136215	19.4863	7.50309
	rs12457799	T	C	T	C	0.0591	-0.0237753	0.3437	0.707708	FALSE	FALSE	FALSE	CffBSP	46392099	0.363209	0.0261478	TRUE	reported	textfile	18	43972062	0.0136	1.39e-05	13422	GCST90274759.txt	TRUE	reported	textfile	TRUE	0.00140498	18.8813	7.50309
	rs12461205	A	G	A	G	0.044	-0.0178517	0.2363	0.80998	FALSE	FALSE	FALSE	CffBSP	47838558	0.551906	0.0300076	TRUE	reported	textfile	19	48341815	0.0136	0.00122	14717	GCST90274759.txt	TRUE	reported	textfile	TRUE	0.000710722	10.4657	7.50309
	rs12532746	A	G	A	G	-0.0386	-0.0082326	0.4368	0.675697	FALSE	FALSE	FALSE	CffBSP	3244891	0.743783	0.0251878	TRUE	reported	textfile	7	3284523	0.012	0.0013	14288	GCST90274759.txt	TRUE	reported	textfile	TRUE	0.000723646	10.3455	7.50309
	rs12655418	A	G	A	G	-0.139	0.0158774	0.034	0.979834	FALSE	FALSE	FALSE	CffBSP	77664608	0.851934	0.0850645	TRUE	reported	textfile	5	76960433	0.0366	0.000146	14716	GCST90274759.txt	TRUE	reported	textfile	TRUE	0.000979157	14.4214	7.50309
	rs12691469	T	C	T	C	-0.0401	0.0129641	0.6148	0.461047	FALSE	FALSE	FALSE	CffBSP	188440258	0.583819	0.0236651	TRUE	reported	textfile	1	188409389	0.0122	0.00101	14288	GCST90274759.txt	TRUE	reported	textfile	TRUE	0.000755561	10.8021	7.50309
	rs12711712	A	C	A	C	0.0417	0.00847275	0.6808	0.29664	FALSE	FALSE	FALSE	CffBSP	125922062	0.745356	0.0260886	TRUE	reported	textfile	2	126679639	0.0128	0.00112	14287	GCST90274759.txt	TRUE	reported	textfile	TRUE	0.000742316	10.6119	7.50309
	rs12780187	A	G	A	G	0.084	-0.0506335	0.9446	0.0298334	FALSE	FALSE	FALSE	CffBSP	6458123	0.463205	0.0690226	TRUE	reported	textfile	10	6500085	0.0256	0.00103	14718	GCST90274759.txt	TRUE	reported	textfile	TRUE	0.000730991	10.7651	7.50309
	rs12792710	A	C	A	C	0.0838	-0.0768035	0.9464	0.0363975	FALSE	FALSE	FALSE	CffBSP	128335598	0.222958	0.0630208	TRUE	reported	textfile	11	128205493	0.0259	0.00121	14735	GCST90274759.txt	TRUE	reported	textfile	TRUE	0.000709954	10.4672	7.50309
	rs12811115	C	G	C	G	-0.0473	0.0425826	0.2027	0.234771	FALSE	TRUE	FALSE	CffBSP	18576290	0.128344	0.0280026	TRUE	reported	textfile	12	18729224	0.0144	0.00102	14718	GCST90274759.txt	TRUE	reported	textfile	TRUE	0.000732538	10.7879	7.50309
	rs12828094	A	G	A	G	0.0682	0.00273097	0.0939	0.934867	FALSE	FALSE	FALSE	CffBSP	113195234	0.953912	0.0472529	TRUE	reported	textfile	12	113633039	0.0208	0.00104	14288	GCST90274759.txt	TRUE	reported	textfile	TRUE	0.000751872	10.7493	7.50309
	rs12911239	T	C	T	C	-0.0979	-0.0125522	0.9211	0.0662132	FALSE	FALSE	FALSE	CffBSP	97757124	0.789883	0.0471068	TRUE	reported	textfile	15	98300354	0.0257	0.000139	11337	GCST90274759.txt	TRUE	reported	textfile	TRUE	0.00127834	14.5085	7.50309
	rs13052997	T	C	T	C	0.1552	0.069063	0.0213	0.981089	FALSE	FALSE	FALSE	CffBSP	37965004	0.437544	0.0889589	TRUE	reported	textfile	21	39337307	0.0489	0.0015	14288	GCST90274759.txt	TRUE	reported	textfile	TRUE	0.000704512	10.0717	7.50309
	rs13058859	T	C	T	C	0.047	0.00996107	0.5755	0.490841	FALSE	FALSE	FALSE	CffBSP	186958749	0.674169	0.0236924	TRUE	reported	textfile	3	186676537	0.0121	0.000103	14288	GCST90274759.txt	TRUE	reported	textfile	TRUE	0.00105486	15.0857	7.50309
	rs13105581	T	C	T	C	0.0888	0.10747	0.08	0.976754	FALSE	FALSE	FALSE	CffBSP	102307673	0.172141	0.078712	TRUE	reported	textfile	4	103228830	0.0231	0.000121	14288	GCST90274759.txt	TRUE	reported	textfile	TRUE	0.00103319	14.7755	7.50309
	rs13125008	T	C	T	C	0.1437	0.0150312	0.0226	0.983283	FALSE	FALSE	FALSE	CffBSP	180392048	0.871107	0.0926407	TRUE	reported	textfile	4	181313201	0.0437	0.00101	14730	GCST90274759.txt	TRUE	reported	textfile	TRUE	0.000733549	10.8116	7.50309
	rs13188	A	G	A	G	0.0536	0.0191624	0.1462	0.868084	FALSE	FALSE	FALSE	CffBSP	2663830	0.584756	0.0350671	TRUE	reported	textfile	7	2703464	0.0168	0.00142	13671	GCST90274759.txt	TRUE	reported	textfile	TRUE	0.000744025	10.1776	7.50309
	rs1322650	T	C	T	C	0.0451	0.0176427	0.7505	0.194567	FALSE	FALSE	FALSE	CffBSP	44552714	0.55533	0.0299134	TRUE	reported	textfile	6	44520451	0.0139	0.00118	14288	GCST90274759.txt	TRUE	reported	textfile	TRUE	0.000736262	10.526	7.50309
	rs13277068	A	G	A	G	0.1644	0.0114609	0.0219	0.989168	FALSE	FALSE	FALSE	CffBSP	79043826	0.920302	0.114547	TRUE	reported	textfile	8	79956061	0.0435	0.000157	14721	GCST90274759.txt	TRUE	reported	textfile	TRUE	0.000969319	14.2812	7.50309
	rs13396083	C	G	C	G	0.0452	0.0041758	0.4358	0.385719	FALSE	TRUE	TRUE	CffBSP	205868979	0.863286	0.0242506	TRUE	reported	textfile	2	206733703	0.0119	0.000146	14288	GCST90274759.txt	TRUE	reported	textfile	FALSE	0.00100873	14.4252	7.50309
	rs1362404	T	G	T	G	0.0394	-0.00469337	0.65	0.375104	FALSE	FALSE	FALSE	CffBSP	51973264	0.847284	0.0243703	TRUE	reported	textfile	16	52007176	0.012	0.00103	14736	GCST90274759.txt	TRUE	reported	textfile	TRUE	0.000731026	10.7788	7.50309
	rs137913499	A	T	A	T	-0.1542	0.0345066	0.9751	0.991343	FALSE	TRUE	FALSE	CffBSP	40766189	0.788081	0.128371	TRUE	reported	textfile	7	40805788	0.0471	0.00106	14288	GCST90274759.txt	TRUE	reported	textfile	TRUE	0.0007496	10.7168	7.50309
	rs138035634	C	G	C	G	-0.2128	0.0609021	0.015	0.00961937	FALSE	TRUE	FALSE	CffBSP	105229499	0.631231	0.12688	TRUE	reported	textfile	14	105695836	0.0569	0.000184	13224	GCST90274759.txt	TRUE	reported	textfile	TRUE	0.00105657	13.9847	7.50309
	rs138094981	A	G	A	G	-0.1288	-0.0360423	0.0259	0.975524	FALSE	FALSE	FALSE	CffBSP	153338864	0.646016	0.0784715	TRUE	reported	textfile	5	152718424	0.0396	0.00114	14728	GCST90274759.txt	TRUE	reported	textfile	TRUE	0.000717771	10.5775	7.50309
	rs138138326	A	G	A	G	0.1137	0.055664	0.0411	0.975917	FALSE	FALSE	FALSE	CffBSP	132805670	0.491599	0.0809343	TRUE	reported	textfile	5	132141362	0.035	0.00116	14288	GCST90274759.txt	TRUE	reported	textfile	TRUE	0.000738062	10.5517	7.50309
	rs139293089	T	C	T	C	-0.2202	0.144252	0.0208	0.993676	FALSE	FALSE	FALSE	CffBSP	60020523	0.318514	0.144611	TRUE	reported	textfile	11	59787996	0.0509	1.52e-05	12935	GCST90274759.txt	TRUE	reported	textfile	TRUE	0.00144479	18.7125	7.50309
	rs139496654	T	G	T	G	0.1145	0.0110897	0.0433	0.949332	FALSE	FALSE	FALSE	CffBSP	17722740	0.835648	0.0534541	TRUE	reported	textfile	12	17875674	0.0298	0.000122	14728	GCST90274759.txt	TRUE	reported	textfile	TRUE	0.00100138	14.7611	7.50309
	rs139520105	T	C	T	C	0.1861	-0.342714	0.013	0.994463	FALSE	FALSE	FALSE	CffBSP	134439345	0.0275036	0.155475	TRUE	reported	textfile	11	134309239	0.0581	0.00136	14734	GCST90274759.txt	TRUE	reported	textfile	TRUE	0.000695853	10.2584	7.50309
	rs139660573	T	C	T	C	-0.0935	0.0111976	0.0577	0.958275	FALSE	FALSE	FALSE	CffBSP	32421890	0.852255	0.0601241	TRUE	reported	textfile	12	32574824	0.0288	0.00117	14288	GCST90274759.txt	TRUE	reported	textfile	TRUE	0.000737134	10.5385	7.50309
	rs139678248	A	G	A	G	-0.1994	0.125839	0.0151	0.993757	FALSE	FALSE	FALSE	CffBSP	109038986	0.395341	0.148051	TRUE	reported	textfile	7	108679043	0.053	0.000168	14243	GCST90274759.txt	TRUE	reported	textfile	TRUE	0.000992809	14.1526	7.50309
	rs139796117	T	C	T	C	0.2003	0.117463	0.0128	0.981802	FALSE	FALSE	FALSE	CffBSP	44410006	0.177785	0.0871641	TRUE	reported	textfile	22	44805886	0.0616	0.00115	14288	GCST90274759.txt	TRUE	reported	textfile	TRUE	0.000739448	10.5716	7.50309
	rs139903639	A	C	A	C	-0.1964	0.0274025	0.987	0.00663506	FALSE	FALSE	FALSE	CffBSP	20085001	0.85024	0.145131	TRUE	reported	textfile	12	20237935	0.0613	0.00136	13422	GCST90274759.txt	TRUE	reported	textfile	TRUE	0.00076421	10.2635	7.50309
	rs140838582	A	G	A	G	-0.3106	-0.0546377	0.0156	0.978391	FALSE	FALSE	FALSE	CffBSP	169551781	0.500035	0.0810125	TRUE	reported	textfile	4	170472932	0.095	0.00108	9844	GCST90274759.txt	TRUE	reported	textfile	TRUE	0.00108471	10.6873	7.50309
	rs141290675	T	C	T	C	0.1687	0.176075	0.0267	0.99264	FALSE	FALSE	FALSE	CffBSP	1425539	0.219009	0.143247	TRUE	reported	textfile	6	1425774	0.0452	0.00019	14288	GCST90274759.txt	TRUE	reported	textfile	TRUE	0.000973999	13.9281	7.50309
	rs141617663	CA	C	CA	C	-0.1199	0.0178445	0.034	0.987586	FALSE	FALSE	FALSE	CffBSP	180072967	0.865912	0.10568	TRUE	reported	textfile	1	180042102	0.0372	0.00127	11331	GCST90274759.txt	TRUE	reported	textfile	TRUE	0.000915981	10.3867	7.50309
	rs142060097	T	C	T	C	-0.1053	0.000591511	0.0402	0.937149	FALSE	FALSE	FALSE	CffBSP	98767676	0.990273	0.0485212	TRUE	reported	textfile	6	99215552	0.033	0.00142	14729	GCST90274759.txt	TRUE	reported	textfile	TRUE	0.000690805	10.1805	7.50309
	rs142225873	A	T	A	T	0.314	-0.0632639	0.9905	0.984094	FALSE	TRUE	FALSE	CffBSP	116721540	0.512142	0.0965113	TRUE	reported	textfile	3	116440387	0.0823	0.000136	12305	GCST90274759.txt	TRUE	reported	textfile	TRUE	0.00118158	14.5542	7.50309
	rs142671256	T	C	T	C	-0.1856	-0.0908731	0.0167	0.963223	FALSE	FALSE	FALSE	CffBSP	133541546	0.148081	0.0628295	TRUE	reported	textfile	4	134462701	0.0575	0.00125	14288	GCST90274759.txt	TRUE	reported	textfile	TRUE	0.000728672	10.4174	7.50309
	rs142970662	A	G	A	G	0.1793	-0.0305741	0.018	0.990228	FALSE	FALSE	FALSE	CffBSP	107321216	0.800302	0.120867	TRUE	reported	textfile	7	106961661	0.0566	0.00154	12792	GCST90274759.txt	TRUE	reported	textfile	TRUE	0.000783878	10.0337	7.50309
	rs143049757	A	G	A	G	0.2403	-0.147616	0.9889	0.00125968	FALSE	FALSE	FALSE	CffBSP	80770848	0.703268	0.387532	TRUE	reported	textfile	9	83385763	0.0742	0.0012	10795	GCST90274759.txt	TRUE	reported	textfile	TRUE	0.000970634	10.4862	7.50309
	rs143136587	A	G	A	G	0.2153	-0.240098	0.9857	0.00959163	FALSE	FALSE	FALSE	CffBSP	45416394	0.0500426	0.122524	TRUE	reported	textfile	11	45437944	0.0571	0.000163	14288	GCST90274759.txt	TRUE	reported	textfile	TRUE	0.00099406	14.2153	7.50309
	rs143233961	A	G	A	G	-0.1421	0.205936	0.023	0.992244	FALSE	FALSE	FALSE	CffBSP	56466732	0.118253	0.131828	TRUE	reported	textfile	18	54133963	0.0437	0.00115	14288	GCST90274759.txt	TRUE	reported	textfile	TRUE	0.00073949	10.5722	7.50309
	rs143634205	A	G	A	G	-0.207	0.151189	0.0112	0.988285	FALSE	FALSE	FALSE	CffBSP	35283987	0.177282	0.112061	TRUE	reported	textfile	3	35325479	0.0649	0.00143	13801	GCST90274759.txt	TRUE	reported	textfile	TRUE	0.000736581	10.1716	7.50309
	rs143741227	A	G	A	G	0.2456	0.0702796	0.0131	0.972186	FALSE	FALSE	FALSE	CffBSP	110719958	0.326967	0.0716963	TRUE	reported	textfile	2	111477535	0.0764	0.00131	13801	GCST90274759.txt	TRUE	reported	textfile	TRUE	0.000748229	10.3325	7.50309
	rs144239715	A	T	A	T	-0.0995	0.00763996	0.9602	0.957533	FALSE	TRUE	FALSE	CffBSP	96987307	0.896432	0.058692	TRUE	reported	textfile	5	96323011	0.0308	0.00124	14731	GCST90274759.txt	TRUE	reported	textfile	TRUE	0.000707954	10.4348	7.50309
	rs144298584	A	G	A	G	-0.1454	-0.0881128	0.9624	0.0187012	FALSE	FALSE	FALSE	CffBSP	80033695	0.312895	0.0873125	TRUE	reported	textfile	3	80082845	0.0337	1.6e-05	14288	GCST90274759.txt	TRUE	reported	textfile	TRUE	0.00130116	18.6127	7.50309
	rs144336502	A	G	A	G	0.2344	0.112364	0.9908	0.0318887	FALSE	FALSE	FALSE	CffBSP	35458389	0.106644	0.0696414	TRUE	reported	textfile	16	34692760	0.0715	0.00104	12125	GCST90274759.txt	TRUE	reported	textfile	TRUE	0.000885598	10.7456	7.50309
	rs144467701	A	C	A	C	-0.1808	-0.0229948	0.9771	0.0123441	FALSE	FALSE	FALSE	CffBSP	105087430	0.826967	0.105195	TRUE	reported	textfile	2	105703888	0.0486	0.000199	14288	GCST90274759.txt	TRUE	reported	textfile	TRUE	0.000967681	13.8377	7.50309
	rs144587566	A	C	A	C	-0.325	0.21326	0.0094	0.997492	FALSE	FALSE	FALSE	CffBSP	19242591	0.37627	0.241029	TRUE	reported	textfile	22	19230114	0.0993	0.00106	8584	GCST90274759.txt	TRUE	reported	textfile	TRUE	0.00124634	10.7094	7.50309
	rs144736574	T	G	T	G	-0.1806	0.131716	0.9809	0.00489341	FALSE	FALSE	FALSE	CffBSP	33223708	0.448218	0.173678	TRUE	reported	textfile	8	33081226	0.0568	0.00147	14288	GCST90274759.txt	TRUE	reported	textfile	TRUE	0.000707066	10.1083	7.50309
	rs145378783	T	G	T	G	-0.1517	-0.0345761	0.0319	0.936418	FALSE	FALSE	FALSE	CffBSP	192629566	0.465364	0.0473618	TRUE	reported	textfile	2	193494292	0.0346	1.16e-05	14725	GCST90274759.txt	TRUE	reported	textfile	TRUE	0.00130376	19.2203	7.50309
	rs145705745	A	G	A	G	-0.1178	-0.0570247	0.9642	0.0562085	FALSE	FALSE	FALSE	CffBSP	225103104	0.272166	0.0519309	TRUE	reported	textfile	1	225290806	0.0312	0.00016	14727	GCST90274759.txt	TRUE	reported	textfile	TRUE	0.000967046	14.2535	7.50309
	rs145919259	A	C	A	C	-0.1846	-0.11201	0.9855	0.0147377	FALSE	FALSE	FALSE	CffBSP	86679417	0.251641	0.0977079	TRUE	reported	textfile	6	87389135	0.0582	0.00151	14092	GCST90274759.txt	TRUE	reported	textfile	TRUE	0.000713403	10.059	7.50309
	rs145986026	T	C	T	C	0.1053	-0.0700019	0.0576	0.96111	FALSE	FALSE	FALSE	CffBSP	3313172	0.248314	0.0606364	TRUE	reported	textfile	1	3229736	0.0325	0.0012	12322	GCST90274759.txt	TRUE	reported	textfile	TRUE	0.000851214	10.4959	7.50309
	rs146549767	T	G	T	G	-0.2224	0.0999194	0.985	0.0225136	FALSE	FALSE	FALSE	CffBSP	77158765	0.218558	0.0812107	TRUE	reported	textfile	17	75154847	0.0572	0.000101	11785	GCST90274759.txt	TRUE	reported	textfile	TRUE	0.00128112	15.1148	7.50309
	rs146688499	A	C	A	C	0.1081	-0.00743905	0.957	0.0499523	FALSE	FALSE	FALSE	CffBSP	9417447	0.891604	0.0545886	TRUE	reported	textfile	11	9438994	0.033	0.00105	13645	GCST90274759.txt	TRUE	reported	textfile	TRUE	0.000785794	10.729	7.50309
	rs147225361	A	G	A	G	0.207	-0.0802667	0.989	0.0186494	FALSE	FALSE	FALSE	CffBSP	46387438	0.353357	0.0864853	TRUE	reported	textfile	3	46428929	0.0636	0.00114	14288	GCST90274759.txt	TRUE	reported	textfile	TRUE	0.000740855	10.5917	7.50309
	rs147251827	G	GC	G	GC	-0.1716	0.0209605	0.9615	0.0332007	FALSE	FALSE	FALSE	CffBSP	124124334	0.75096	0.0660435	TRUE	reported	textfile	8	125136575	0.0393	1.26e-05	10894	GCST90274759.txt	TRUE	reported	textfile	TRUE	0.00174704	19.0621	7.50309
	rs147484201	A	G	A	G	-0.2047	0.15888	0.0161	0.99591	FALSE	FALSE	FALSE	CffBSP	46375166	0.380551	0.181188	TRUE	reported	textfile	8	47286788	0.0624	0.00104	10218	GCST90274759.txt	TRUE	reported	textfile	TRUE	0.00105207	10.7592	7.50309
	rs147500123	A	G	A	G	0.1505	-0.202787	0.0182	0.989934	FALSE	FALSE	FALSE	CffBSP	33793836	0.0933491	0.120851	TRUE	reported	textfile	18	31373800	0.0459	0.00104	14248	GCST90274759.txt	TRUE	reported	textfile	TRUE	0.000753991	10.7495	7.50309
	rs147693081	A	G	A	G	-0.3898	-0.265477	0.0088	0.987475	FALSE	FALSE	FALSE	CffBSP	6916091	0.00708109	0.0985801	TRUE	reported	textfile	4	6917818	0.1011	0.000115	9057	GCST90274759.txt	TRUE	reported	textfile	TRUE	0.00163864	14.8623	7.50309
	rs147699814	A	G	A	G	0.1842	-0.0274007	0.0164	0.973446	FALSE	FALSE	FALSE	CffBSP	140134650	0.710555	0.0738347	TRUE	reported	textfile	7	139834450	0.0568	0.00118	14288	GCST90274759.txt	TRUE	reported	textfile	TRUE	0.000735515	10.5153	7.50309
	rs147990158	T	C	T	C	-0.2463	-0.0583822	0.9871	0.00372954	FALSE	FALSE	FALSE	CffBSP	75326432	0.765939	0.196116	TRUE	reported	textfile	15	75618773	0.0655	0.00017	11340	GCST90274759.txt	TRUE	reported	textfile	TRUE	0.00124535	14.1374	7.50309
	rs148026885	T	C	T	C	0.1702	0.0229723	0.0163	0.965992	FALSE	FALSE	FALSE	CffBSP	34475310	0.736528	0.0682776	TRUE	reported	textfile	7	34514922	0.052	0.00106	14288	GCST90274759.txt	TRUE	reported	textfile	TRUE	0.000749231	10.7115	7.50309
	rs148045404	A	G	A	G	-0.1242	0.089104	0.961	0.0199998	FALSE	FALSE	FALSE	CffBSP	3084465	0.291228	0.0844242	TRUE	reported	textfile	20	3065111	0.0384	0.00122	14288	GCST90274759.txt	TRUE	reported	textfile	TRUE	0.00073163	10.4597	7.50309
	rs148134637	T	TG	A	ACC	-0.0456	0.204871	0.4949	0.00237716	TRUE	FALSE	FALSE	CffBSP	43125446	0.459377	0.2769	TRUE	reported	textfile	14	43594649	0.0141	0.00122	10894	GCST90274759.txt	TRUE	reported	textfile	FALSE	0.000959152	10.4571	7.50309
	rs1483473	A	C	A	C	-0.0387	-0.0161754	0.5584	0.470832	FALSE	FALSE	FALSE	CffBSP	88755018	0.492343	0.0235592	TRUE	reported	textfile	3	88804168	0.0119	0.00115	14288	GCST90274759.txt	TRUE	reported	textfile	TRUE	0.000739665	10.5747	7.50309
	rs148381317	T	C	T	C	0.2218	0.0942247	0.0168	0.997908	FALSE	FALSE	FALSE	CffBSP	37471101	0.718317	0.261221	TRUE	reported	textfile	7	37510704	0.0678	0.00107	11439	GCST90274759.txt	TRUE	reported	textfile	TRUE	0.000934694	10.7001	7.50309
	rs148559165	A	G	A	G	0.1897	-0.151195	0.0225	0.992241	FALSE	FALSE	FALSE	CffBSP	27648335	0.254873	0.132791	TRUE	reported	textfile	1	27974846	0.0491	0.000112	13224	GCST90274759.txt	TRUE	reported	textfile	TRUE	0.00112751	14.9247	7.50309
	rs148697053	T	C	T	C	0.209	0.231503	0.014	0.987799	FALSE	FALSE	FALSE	CffBSP	188188729	0.0316483	0.107735	TRUE	reported	textfile	4	189109883	0.0649	0.00128	12935	GCST90274759.txt	TRUE	reported	textfile	TRUE	0.000801104	10.369	7.50309
	rs148920364	C	G	C	G	0.1998	-0.0782323	0.9889	0.990726	FALSE	TRUE	FALSE	CffBSP	94808101	0.524822	0.12302	TRUE	reported	textfile	10	96567858	0.0616	0.00118	14249	GCST90274759.txt	TRUE	reported	textfile	TRUE	0.000737776	10.5189	7.50309
	rs149013056	T	C	T	C	0.1895	-0.171128	0.0155	0.99319	FALSE	FALSE	FALSE	CffBSP	32057397	0.246625	0.147704	TRUE	reported	textfile	20	30645200	0.0579	0.00106	14288	GCST90274759.txt	TRUE	reported	textfile	TRUE	0.000749142	10.7103	7.50309
	rs149114453	A	G	A	G	-0.197	-0.216608	0.0206	0.988673	FALSE	FALSE	FALSE	CffBSP	80973008	0.0534712	0.112169	TRUE	reported	textfile	16	81006905	0.0516	0.000135	14288	GCST90274759.txt	TRUE	reported	textfile	TRUE	0.0010191	14.5738	7.50309
	rs149126851	A	G	A	G	-0.1182	-0.00174684	0.0409	0.926385	FALSE	FALSE	FALSE	CffBSP	221959529	0.9697	0.0459873	TRUE	reported	textfile	1	222132871	0.0312	0.000152	14723	GCST90274759.txt	TRUE	reported	textfile	TRUE	0.000973882	14.3505	7.50309
	rs149197016	CA	C	CA	C	-0.1033	-0.0198733	0.0463	0.945056	FALSE	FALSE	FALSE	CffBSP	48867691	0.70311	0.0521438	TRUE	reported	textfile	17	46945053	0.0315	0.00104	11342	GCST90274759.txt	TRUE	reported	textfile	TRUE	0.00094728	10.7523	7.50309
	rs149373937	T	G	T	G	0.1478	-0.0729462	0.0241	0.970442	FALSE	FALSE	FALSE	CffBSP	118061947	0.287558	0.0685911	TRUE	reported	textfile	6	118383110	0.0466	0.00152	14736	GCST90274759.txt	TRUE	reported	textfile	TRUE	0.000682183	10.0581	7.50309
	rs149385590	A	G	A	G	0.2297	0.0249589	0.0169	0.991129	FALSE	FALSE	FALSE	CffBSP	22353816	0.842291	0.125445	TRUE	reported	textfile	22	22708163	0.0704	0.0011	10897	GCST90274759.txt	TRUE	reported	textfile	TRUE	0.000975991	10.6438	7.50309
	rs149508820	T	C	T	C	0.1972	-0.0230174	0.982	0.00691133	FALSE	FALSE	FALSE	CffBSP	81741694	0.875328	0.146706	TRUE	reported	textfile	9	84356609	0.0515	0.000129	13801	GCST90274759.txt	TRUE	reported	textfile	TRUE	0.00106127	14.6601	7.50309
	rs1495879	T	C	T	C	-0.0406	0.00817826	0.3233	0.710216	FALSE	FALSE	FALSE	CffBSP	25035450	0.752764	0.025963	TRUE	reported	textfile	5	25035559	0.0124	0.00106	14721	GCST90274759.txt	TRUE	reported	textfile	TRUE	0.000727705	10.7189	7.50309
	rs149607261	T	C	T	C	-0.1565	0.12973	0.0184	0.99594	FALSE	FALSE	FALSE	CffBSP	41628169	0.476141	0.182071	TRUE	reported	textfile	18	39208133	0.0477	0.00103	14734	GCST90274759.txt	TRUE	reported	textfile	TRUE	0.000730052	10.763	7.50309
	rs150163080	C	G	C	G	-0.1065	0.0338119	0.9506	0.914967	FALSE	TRUE	FALSE	CffBSP	41504573	0.419515	0.0418846	TRUE	reported	textfile	20	40133212	0.0276	0.000114	14723	GCST90274759.txt	TRUE	reported	textfile	TRUE	0.00101029	14.8875	7.50309
	rs150331935	T	C	T	C	0.2098	-0.134355	0.9816	0.00206582	FALSE	FALSE	FALSE	CffBSP	67214891	0.595164	0.252847	TRUE	reported	textfile	15	67507229	0.0653	0.00131	11139	GCST90274759.txt	TRUE	reported	textfile	TRUE	0.00092584	10.3206	7.50309
	rs150449713	C	G	C	G	-0.0888	-0.00264638	0.9423	0.915951	FALSE	TRUE	FALSE	CffBSP	78617527	0.951573	0.0435755	TRUE	reported	textfile	1	79083212	0.0275	0.00124	14288	GCST90274759.txt	TRUE	reported	textfile	TRUE	0.000729243	10.4256	7.50309
	rs150501401	T	G	T	G	-0.142	-0.163536	0.9601	0.0434382	FALSE	FALSE	FALSE	CffBSP	14210382	0.00641594	0.059997	TRUE	reported	textfile	11	14231928	0.0323	1.1e-05	12845	GCST90274759.txt	TRUE	reported	textfile	TRUE	0.0015024	19.3243	7.50309
	rs150607958	A	G	A	G	0.1402	0.0582395	0.9791	0.00533673	FALSE	FALSE	FALSE	CffBSP	85032977	0.729066	0.168144	TRUE	reported	textfile	6	85742695	0.0428	0.00105	14245	GCST90274759.txt	TRUE	reported	textfile	TRUE	0.000752695	10.7287	7.50309
	rs150758785	A	T	A	T	-0.1494	0.0719064	0.0201	0.00975687	FALSE	TRUE	FALSE	CffBSP	3271402	0.551391	0.120714	TRUE	reported	textfile	9	3271402	0.046	0.00116	14288	GCST90274759.txt	TRUE	reported	textfile	TRUE	0.000737723	10.5469	7.50309
	rs150918481	A	G	A	G	-0.1439	-0.000587665	0.0339	0.986801	FALSE	FALSE	FALSE	CffBSP	113270370	0.995252	0.0987571	TRUE	reported	textfile	13	113924684	0.0374	0.000119	14288	GCST90274759.txt	TRUE	reported	textfile	TRUE	0.00103504	14.8019	7.50309
	rs150944353	A	G	A	G	0.1985	-0.11325	0.9853	0.00393894	FALSE	FALSE	FALSE	CffBSP	21953694	0.54646	0.187788	TRUE	reported	textfile	18	19533655	0.0604	0.00101	13801	GCST90274759.txt	TRUE	reported	textfile	TRUE	0.000781982	10.799	7.50309
	rs150980691	A	G	A	G	-0.1549	0.211563	0.0253	0.990069	FALSE	FALSE	FALSE	CffBSP	9886397	0.0687844	0.116254	TRUE	reported	textfile	18	9886394	0.0411	0.000164	14288	GCST90274759.txt	TRUE	reported	textfile	TRUE	0.000993153	14.2023	7.50309
	rs151057149	T	G	T	G	-0.2116	0.0696278	0.0174	0.997764	FALSE	FALSE	FALSE	CffBSP	66316128	0.78964	0.260994	TRUE	reported	textfile	6	67026021	0.0565	0.00018	11051	GCST90274759.txt	TRUE	reported	textfile	TRUE	0.0012676	14.0235	7.50309
	rs1516889	T	C	T	C	-0.0904	0.166938	0.9514	0.0178666	FALSE	FALSE	FALSE	CffBSP	106224390	0.0615942	0.0893101	TRUE	reported	textfile	9	108986671	0.0275	0.00101	14734	GCST90274759.txt	TRUE	reported	textfile	TRUE	0.000732879	10.8047	7.50309
	rs16822529	T	C	T	C	0.049	0.0527238	0.8251	0.172114	FALSE	FALSE	FALSE	CffBSP	153320122	0.0959401	0.0316686	TRUE	reported	textfile	3	153037911	0.0152	0.00127	14735	GCST90274759.txt	TRUE	reported	textfile	TRUE	0.000704772	10.3907	7.50309
	rs16921768	C	G	C	G	-0.0603	0.000299769	0.8227	0.805091	FALSE	TRUE	FALSE	CffBSP	51708049	0.992012	0.0299406	TRUE	reported	textfile	10	53467809	0.0162	0.000197	14288	GCST90274759.txt	TRUE	reported	textfile	TRUE	0.000968751	13.853	7.50309
	rs1697170	T	G	T	G	0.1028	0.0222338	0.0495	0.929435	FALSE	FALSE	FALSE	CffBSP	14248098	0.626275	0.0456569	TRUE	reported	textfile	5	14248207	0.0268	0.000125	14731	GCST90274759.txt	TRUE	reported	textfile	TRUE	0.000997817	14.7115	7.50309
	rs17087296	T	G	T	G	0.1371	0.0160979	0.9786	0.0150934	FALSE	FALSE	FALSE	CffBSP	73333250	0.866182	0.0955312	TRUE	reported	textfile	18	71000485	0.0419	0.00107	14725	GCST90274759.txt	TRUE	reported	textfile	TRUE	0.000726567	10.705	7.50309
	rs17144796	A	G	A	G	0.115	0.125233	0.969	0.0416543	FALSE	FALSE	FALSE	CffBSP	122752361	0.0401717	0.0610302	TRUE	reported	textfile	7	122392415	0.0356	0.00124	14736	GCST90274759.txt	TRUE	reported	textfile	TRUE	0.000707634	10.4337	7.50309
	rs17276306	T	C	T	C	-0.049	0.0398427	0.6264	0.348351	FALSE	FALSE	FALSE	CffBSP	230573885	0.108289	0.0248097	TRUE	reported	textfile	2	231438600	0.0126	0.000101	13216	GCST90274759.txt	TRUE	reported	textfile	TRUE	0.00114302	15.1212	7.50309
	rs1729031	T	C	T	C	0.0464	0.0739659	0.4318	0.623243	FALSE	FALSE	FALSE	CffBSP	32522171	0.00241541	0.0243811	TRUE	reported	textfile	5	32522277	0.012	0.00011	14288	GCST90274759.txt	TRUE	reported	textfile	TRUE	0.00104532	14.949	7.50309
	rs17352040	T	C	T	C	-0.1368	0.0683101	0.9681	0.0130501	FALSE	FALSE	FALSE	CffBSP	54929877	0.521889	0.106662	TRUE	reported	textfile	20	53546416	0.0365	0.000178	14248	GCST90274759.txt	TRUE	reported	textfile	TRUE	0.000984928	14.0451	7.50309
	rs17434983	T	G	T	G	0.0629	0.0180692	0.1621	0.891615	FALSE	FALSE	FALSE	CffBSP	106547578	0.631382	0.0376612	TRUE	reported	textfile	1	107090200	0.0162	0.000103	14735	GCST90274759.txt	TRUE	reported	textfile	TRUE	0.00102206	15.0734	7.50309
	rs17527360	A	G	A	G	-0.0849	-0.069046	0.9423	0.0359477	FALSE	FALSE	FALSE	CffBSP	19609656	0.273196	0.0630137	TRUE	reported	textfile	11	19631202	0.026	0.00109	14288	GCST90274759.txt	TRUE	reported	textfile	TRUE	0.000745716	10.6612	7.50309
	rs17546598	T	C	T	C	-0.0694	0.0336604	0.0833	0.907264	FALSE	FALSE	FALSE	CffBSP	117419063	0.40744	0.0406327	TRUE	reported	textfile	10	119178574	0.0211	0.00101	14735	GCST90274759.txt	TRUE	reported	textfile	TRUE	0.000733644	10.8167	7.50309
	rs17597520	T	C	T	C	-0.0597	0.0297776	0.8872	0.0900418	FALSE	FALSE	FALSE	CffBSP	161951594	0.472059	0.0414076	TRUE	reported	textfile	4	162872746	0.0182	0.00104	14736	GCST90274759.txt	TRUE	reported	textfile	TRUE	0.000729641	10.7584	7.50309
	rs17633731	T	C	T	C	0.081	-0.00584704	0.941	0.0448507	FALSE	FALSE	FALSE	CffBSP	29524256	0.917116	0.0561856	TRUE	reported	textfile	5	29524363	0.025	0.0012	14729	GCST90274759.txt	TRUE	reported	textfile	TRUE	0.000712209	10.4962	7.50309
	rs1767111	A	C	A	C	-0.0793	0.102617	0.067	0.92579	FALSE	FALSE	FALSE	CffBSP	123549344	0.0228376	0.0450837	TRUE	reported	textfile	10	125308860	0.0242	0.00105	14288	GCST90274759.txt	TRUE	reported	textfile	TRUE	0.000750962	10.7363	7.50309
	rs17830895	A	G	A	G	-0.1225	-0.0409477	0.9693	0.0358712	FALSE	FALSE	FALSE	CffBSP	78775652	0.521436	0.0638677	TRUE	reported	textfile	13	79349787	0.0383	0.00138	14288	GCST90274759.txt	TRUE	reported	textfile	TRUE	0.000715472	10.2285	7.50309
	rs180977599	T	C	T	C	0.2242	0.124595	0.9863	0.00270604	FALSE	FALSE	FALSE	CffBSP	132402321	0.59143	0.232122	TRUE	reported	textfile	4	133323476	0.0697	0.0013	10537	GCST90274759.txt	TRUE	reported	textfile	TRUE	0.000980985	10.3448	7.50309
	rs1834022	A	G	A	G	-0.1465	-0.0748104	0.0268	0.984962	FALSE	FALSE	FALSE	CffBSP	87360780	0.434965	0.0958218	TRUE	reported	textfile	16	87394386	0.0447	0.00105	11784	GCST90274759.txt	TRUE	reported	textfile	TRUE	0.000910693	10.7396	7.50309
	rs184367948	A	T	A	T	0.1714	-0.0272509	0.9774	0.995623	FALSE	TRUE	FALSE	CffBSP	33604333	0.883319	0.185679	TRUE	reported	textfile	5	33604438	0.0458	0.000182	14288	GCST90274759.txt	TRUE	reported	textfile	TRUE	0.00097925	14.0033	7.50309
	rs1852547	C	G	C	G	0.051	-0.0350016	0.7863	0.832047	FALSE	TRUE	FALSE	CffBSP	74824327	0.267376	0.0315578	TRUE	reported	textfile	3	74873478	0.0159	0.00134	11769	GCST90274759.txt	TRUE	reported	textfile	TRUE	0.000873428	10.2866	7.50309
	rs185391324	A	C	A	C	-0.1118	-0.0819291	0.0486	0.937114	FALSE	FALSE	FALSE	CffBSP	66402225	0.0990764	0.0496735	TRUE	reported	textfile	4	67267943	0.0293	0.000136	14288	GCST90274759.txt	TRUE	reported	textfile	TRUE	0.00101797	14.5575	7.50309
	rs186154507	T	G	T	G	-0.1844	-0.0288339	0.0161	0.977853	FALSE	FALSE	FALSE	CffBSP	112043397	0.725765	0.0822032	TRUE	reported	textfile	8	113055626	0.0567	0.00115	13644	GCST90274759.txt	TRUE	reported	textfile	TRUE	0.0007746	10.5753	7.50309
	rs1862254	T	C	T	C	0.0466	0.046808	0.629	0.376701	FALSE	FALSE	FALSE	CffBSP	13548094	0.0538865	0.0242812	TRUE	reported	textfile	19	13658908	0.012	0.000103	14718	GCST90274759.txt	TRUE	reported	textfile	TRUE	0.00102357	15.0782	7.50309
	rs186489308	A	G	A	G	-0.1887	-0.161157	0.0224	0.993386	FALSE	FALSE	FALSE	CffBSP	42427844	0.277705	0.148465	TRUE	reported	textfile	1	42893515	0.0505	0.000187	12935	GCST90274759.txt	TRUE	reported	textfile	TRUE	0.00107827	13.9603	7.50309
	rs187461179	A	G	A	G	-0.2159	0.258708	0.0114	0.990646	FALSE	FALSE	FALSE	CffBSP	76044086	0.0320184	0.120656	TRUE	reported	textfile	16	76077984	0.066	0.00107	14288	GCST90274759.txt	TRUE	reported	textfile	TRUE	0.000748378	10.6993	7.50309
	rs1874891	A	T	A	T	-0.1512	0.0166295	0.9805	0.993265	FALSE	TRUE	FALSE	CffBSP	68910968	0.905016	0.13936	TRUE	reported	textfile	12	69304748	0.0466	0.00118	13383	GCST90274759.txt	TRUE	reported	textfile	TRUE	0.000786026	10.5261	7.50309
	rs187623773	A	G	A	G	0.214	-0.0989508	0.9869	0.0343216	FALSE	FALSE	FALSE	CffBSP	104015630	0.135742	0.0663283	TRUE	reported	textfile	9	106777911	0.0653	0.00105	12404	GCST90274759.txt	TRUE	reported	textfile	TRUE	0.000865095	10.7382	7.50309
	rs1877558	T	C	T	C	0.0472	0.00332477	0.3176	0.811327	FALSE	FALSE	FALSE	CffBSP	50232820	0.912193	0.0301505	TRUE	reported	textfile	10	51992580	0.0148	0.00143	13421	GCST90274759.txt	TRUE	reported	textfile	TRUE	0.000757263	10.1694	7.50309
	rs1881543	T	C	T	C	-0.0513	0.0280773	0.4345	0.531178	FALSE	FALSE	FALSE	CffBSP	81067194	0.235081	0.0236465	TRUE	reported	textfile	7	80696510	0.0119	1.63e-05	14288	GCST90274759.txt	TRUE	reported	textfile	TRUE	0.00129899	18.5815	7.50309
	rs188656905	A	C	A	C	-0.133	0.0437668	0.9519	0.0381818	FALSE	FALSE	FALSE	CffBSP	33961613	0.48571	0.0627798	TRUE	reported	textfile	15	34253814	0.0344	0.000111	12404	GCST90274759.txt	TRUE	reported	textfile	TRUE	0.00120365	14.9457	7.50309
	rs1890978	A	G	A	G	-0.0428	-0.0158436	0.2536	0.718794	FALSE	FALSE	FALSE	CffBSP	50378138	0.547509	0.0263402	TRUE	reported	textfile	14	50844856	0.0133	0.00129	14720	GCST90274759.txt	TRUE	reported	textfile	TRUE	0.000703025	10.3544	7.50309
	rs189659126	A	G	A	G	0.1155	0.107082	0.9602	0.0235127	FALSE	FALSE	FALSE	CffBSP	27092992	0.169541	0.0779525	TRUE	reported	textfile	22	27488954	0.0304	0.000145	14729	GCST90274759.txt	TRUE	reported	textfile	TRUE	0.00097908	14.433	7.50309
	rs190983305	A	G	A	G	-0.1205	-0.0216869	0.0399	0.983621	FALSE	FALSE	FALSE	CffBSP	116409555	0.813324	0.0918392	TRUE	reported	textfile	7	116049609	0.0322	0.000182	12844	GCST90274759.txt	TRUE	reported	textfile	TRUE	0.00108915	14.0021	7.50309
	rs191441	T	C	T	C	0.06	-0.0225369	0.1107	0.916159	FALSE	FALSE	FALSE	CffBSP	13249081	0.593566	0.0422295	TRUE	reported	textfile	2	13389206	0.0183	0.00104	14736	GCST90274759.txt	TRUE	reported	textfile	TRUE	0.000728961	10.7483	7.50309
	rs192396605	A	G	A	G	0.2595	-0.120374	0.9861	0.0110278	FALSE	FALSE	FALSE	CffBSP	101359538	0.28227	0.111951	TRUE	reported	textfile	5	100695242	0.0686	0.000155	11871	GCST90274759.txt	TRUE	reported	textfile	TRUE	0.00120397	14.3072	7.50309
	rs192659497	T	C	T	C	0.1639	-0.114415	0.0174	0.968427	FALSE	FALSE	FALSE	CffBSP	60501820	0.101175	0.0698003	TRUE	reported	textfile	20	59076878	0.0512	0.00137	14730	GCST90274759.txt	TRUE	reported	textfile	TRUE	0.000695206	10.2461	7.50309
	rs192788723	T	G	T	G	-0.1435	0.00509906	0.9647	0.0973153	FALSE	FALSE	FALSE	CffBSP	124984597	0.897545	0.0396004	TRUE	reported	textfile	5	124320290	0.0375	0.00013	14732	GCST90274759.txt	TRUE	reported	textfile	TRUE	0.000992997	14.6414	7.50309
	rs192811883	A	G	A	G	-0.2652	-0.274457	0.0092	0.989043	FALSE	FALSE	FALSE	CffBSP	38157733	0.0148576	0.112675	TRUE	reported	textfile	18	35737697	0.0705	0.000169	13644	GCST90274759.txt	TRUE	reported	textfile	TRUE	0.00103604	14.1483	7.50309
	rs1950213	T	C	T	C	-0.0611	-0.00478816	0.848	0.143799	FALSE	FALSE	FALSE	CffBSP	32811434	0.886498	0.0335454	TRUE	reported	textfile	14	33280640	0.016	0.000134	14731	GCST90274759.txt	TRUE	reported	textfile	TRUE	0.000988964	14.5809	7.50309
	rs1953249	A	G	A	G	0.0737	0.00904355	0.0739	0.919042	FALSE	FALSE	FALSE	CffBSP	62656219	0.834125	0.0431851	TRUE	reported	textfile	14	63122937	0.0225	0.00105	14736	GCST90274759.txt	TRUE	reported	textfile	TRUE	0.000727569	10.7278	7.50309
	rs1958062	A	G	A	G	0.0522	-0.0175178	0.8107	0.268992	FALSE	FALSE	FALSE	CffBSP	33808357	0.516759	0.0270191	TRUE	reported	textfile	14	34277563	0.0163	0.00136	14288	GCST90274759.txt	TRUE	reported	textfile	TRUE	0.00071727	10.2543	7.50309
	rs1965748	C	G	C	G	-0.0659	0.0324241	0.8747	0.903431	FALSE	TRUE	FALSE	CffBSP	32933195	0.413955	0.0396891	TRUE	reported	textfile	6	32900972	0.0176	0.000181	14732	GCST90274759.txt	TRUE	reported	textfile	TRUE	0.00095076	14.018	7.50309
	rs1975171	T	C	T	C	0.0474	0.0433311	0.402	0.644047	FALSE	FALSE	FALSE	CffBSP	5352857	0.0806455	0.0248038	TRUE	reported	textfile	19	5352868	0.0125	0.000149	14288	GCST90274759.txt	TRUE	reported	textfile	TRUE	0.00100538	14.3773	7.50309
	rs1982260	A	G	A	G	0.0631	0.027978	0.8478	0.139636	FALSE	FALSE	FALSE	CffBSP	98321006	0.414428	0.0342815	TRUE	reported	textfile	15	98864235	0.0168	0.000173	14287	GCST90274759.txt	TRUE	reported	textfile	TRUE	0.00098644	14.1052	7.50309
	rs2001425	T	C	T	C	-0.0378	0.00245497	0.3726	0.66373	FALSE	FALSE	FALSE	CffBSP	125053238	0.921874	0.0250321	TRUE	reported	textfile	3	124772082	0.0118	0.00136	14736	GCST90274759.txt	TRUE	reported	textfile	TRUE	0.000695885	10.2603	7.50309
	rs200477630	A	ATGTGACTG	A	ATGTGACTG	-0.3138	0.837722	0.9903	0.000432398	FALSE	FALSE	FALSE	CffBSP	178181723	0.17435	0.616717	TRUE	reported	textfile	2	179046450	0.0835	0.000171	8911	GCST90274759.txt	TRUE	reported	textfile	TRUE	0.00158241	14.12	7.50309
	rs201329578	T	TC	T	TC	-0.3404	0.319999	0.9913	0.00224628	FALSE	FALSE	FALSE	CffBSP	21776893	0.196431	0.247718	TRUE	reported	textfile	21	23149213	0.0885	0.00012	8911	GCST90274759.txt	TRUE	reported	textfile	TRUE	0.00165747	14.7909	7.50309
	rs2024877	T	C	T	C	0.0628	0.0189145	0.1506	0.899638	FALSE	FALSE	FALSE	CffBSP	157456134	0.632017	0.0394966	TRUE	reported	textfile	6	157877166	0.0167	0.00017	14723	GCST90274759.txt	TRUE	reported	textfile	TRUE	0.000959562	14.1393	7.50309
	rs2041813	A	G	A	G	0.0432	-0.0433004	0.2794	0.685005	FALSE	FALSE	FALSE	CffBSP	58627439	0.0890471	0.0254642	TRUE	reported	textfile	2	58854574	0.0132	0.00107	14287	GCST90274759.txt	TRUE	reported	textfile	TRUE	0.000749123	10.7092	7.50309
	rs2051176	A	G	A	G	0.1061	0.0578277	0.0489	0.933122	FALSE	FALSE	FALSE	CffBSP	26103058	0.222103	0.0473627	TRUE	reported	textfile	21	27475375	0.0276	0.000121	14731	GCST90274759.txt	TRUE	reported	textfile	TRUE	0.00100218	14.7759	7.50309
	rs2073009	A	G	A	G	0.0384	0.0233528	0.5563	0.541939	FALSE	FALSE	FALSE	CffBSP	572480	0.321454	0.0235536	TRUE	reported	textfile	6	572480	0.0119	0.00125	14288	GCST90274759.txt	TRUE	reported	textfile	TRUE	0.00072825	10.4114	7.50309
	rs2086887	A	C	A	C	0.0399	-0.0295293	0.3854	0.609463	FALSE	FALSE	FALSE	CffBSP	173978727	0.223078	0.0242364	TRUE	reported	textfile	5	173405730	0.0123	0.00118	14288	GCST90274759.txt	TRUE	reported	textfile	TRUE	0.000735943	10.5214	7.50309
	rs2103578	C	G	C	G	0.0598	0.045756	0.7404	0.787516	FALSE	TRUE	FALSE	CffBSP	37535748	0.110836	0.0286972	TRUE	reported	textfile	22	37931755	0.0136	1.1e-05	14288	GCST90274759.txt	TRUE	reported	textfile	TRUE	0.00135134	19.3314	7.50309
	rs2120583	T	C	T	C	0.0479	0.0148896	0.2225	0.730386	FALSE	FALSE	FALSE	CffBSP	105605945	0.578181	0.0267779	TRUE	reported	textfile	3	105324789	0.0147	0.00112	14288	GCST90274759.txt	TRUE	reported	textfile	TRUE	0.000742578	10.6164	7.50309
	rs2249711	A	G	A	G	0.0702	-0.0340938	0.8667	0.147218	FALSE	FALSE	FALSE	CffBSP	44187159	0.306627	0.0333492	TRUE	reported	textfile	13	44761295	0.0181	0.000105	13230	GCST90274759.txt	TRUE	reported	textfile	TRUE	0.0011357	15.0401	7.50309
	rs2299690	T	C	T	C	0.1089	0.0180879	0.4162	0.623145	FALSE	FALSE	FALSE	CffBSP	44645153	0.456224	0.0242765	TRUE	reported	textfile	20	43273794	0.012	1.14e-19	14288	GCST90274759.txt	TRUE	reported	textfile	TRUE	0.00573094	82.3441	7.50309
	rs2331546	T	C	T	C	-0.0583	-0.0456125	0.8518	0.126034	FALSE	FALSE	FALSE	CffBSP	180602098	0.196907	0.0353472	TRUE	reported	textfile	1	180571234	0.0178	0.00106	12792	GCST90274759.txt	TRUE	reported	textfile	TRUE	0.000837905	10.7258	7.50309
	rs2341555	T	G	T	G	-0.0514	0.0114121	0.2496	0.825673	FALSE	FALSE	FALSE	CffBSP	159384537	0.712333	0.0309502	TRUE	reported	textfile	6	159805569	0.0138	0.000196	14288	GCST90274759.txt	TRUE	reported	textfile	TRUE	0.000970008	13.871	7.50309
	rs2348036	A	G	A	G	0.0515	0.0297133	0.5081	0.522549	FALSE	FALSE	FALSE	CffBSP	7303673	0.209045	0.0236534	TRUE	reported	textfile	7	7343304	0.0118	1.27e-05	14288	GCST90274759.txt	TRUE	reported	textfile	TRUE	0.00133138	19.0454	7.50309
	rs2373561	A	C	A	C	-0.0637	-0.0265049	0.1048	0.862425	FALSE	FALSE	FALSE	CffBSP	101986670	0.441294	0.0344215	TRUE	reported	textfile	12	102380448	0.0198	0.00129	14288	GCST90274759.txt	TRUE	reported	textfile	TRUE	0.000723873	10.3487	7.50309
	rs2373976	T	C	T	C	-0.0656	0.00541927	0.1777	0.779954	FALSE	FALSE	FALSE	CffBSP	41035363	0.848651	0.028397	TRUE	reported	textfile	2	41262503	0.015	1.22e-05	14730	GCST90274759.txt	TRUE	reported	textfile	TRUE	0.00129676	19.1234	7.50309
	rs2390858	A	T	A	T	0.0469	-0.0190236	0.3511	0.311126	FALSE	TRUE	FALSE	CffBSP	23982239	0.453371	0.0253713	TRUE	reported	textfile	7	24021858	0.0126	0.000197	14288	GCST90274759.txt	TRUE	reported	textfile	TRUE	0.000968751	13.853	7.50309
	rs2408876	T	C	T	C	0.0417	0.0285654	0.6104	0.32237	FALSE	FALSE	FALSE	CffBSP	47879782	0.258938	0.0253036	TRUE	reported	textfile	12	48273565	0.013	0.00134	14723	GCST90274759.txt	TRUE	reported	textfile	TRUE	0.00069837	10.2879	7.50309
	rs2416708	A	C	A	C	-0.0419	0.0212712	0.3184	0.725001	FALSE	FALSE	FALSE	CffBSP	119501647	0.419403	0.0263434	TRUE	reported	textfile	9	122263925	0.013	0.00127	14288	GCST90274759.txt	TRUE	reported	textfile	TRUE	0.000726531	10.3868	7.50309
	rs2433068	A	G	A	G	-0.0486	0.00446655	0.3333	0.675849	FALSE	FALSE	FALSE	CffBSP	132736782	0.858086	0.0249791	TRUE	reported	textfile	8	133749028	0.0126	0.000115	14288	GCST90274759.txt	TRUE	reported	textfile	TRUE	0.00104018	14.8755	7.50309
	rs2445547	A	C	A	C	0.0397	-0.0536959	0.4706	0.53846	FALSE	FALSE	FALSE	CffBSP	87103995	0.0227672	0.0235786	TRUE	reported	textfile	11	86815037	0.0121	0.00103	12849	GCST90274759.txt	TRUE	reported	textfile	TRUE	0.0008371	10.7632	7.50309
	rs2456251	T	C	T	C	-0.0366	0.0365187	0.4942	0.462843	FALSE	FALSE	FALSE	CffBSP	75292874	0.122825	0.023667	TRUE	reported	textfile	10	77052632	0.0114	0.00132	14727	GCST90274759.txt	TRUE	reported	textfile	TRUE	0.000699414	10.3061	7.50309
	rs2467599	T	C	T	C	0.041	0.0461822	0.7003	0.33143	FALSE	FALSE	FALSE	CffBSP	29206849	0.0646726	0.024997	TRUE	reported	textfile	11	29228396	0.0125	0.00104	14736	GCST90274759.txt	TRUE	reported	textfile	TRUE	0.000729543	10.7569	7.50309
	rs2573149	A	G	A	G	0.0582	-0.0238591	0.1815	0.885666	FALSE	FALSE	FALSE	CffBSP	1023149	0.515649	0.0367025	TRUE	reported	textfile	16	1073149	0.0155	0.000173	13662	GCST90274759.txt	TRUE	reported	textfile	TRUE	0.00103091	14.0967	7.50309
	rs260455	A	G	A	G	-0.0488	0.0183962	0.8137	0.28087	FALSE	FALSE	FALSE	CffBSP	58256126	0.485576	0.0263796	TRUE	reported	textfile	19	58767492	0.0149	0.00106	14736	GCST90274759.txt	TRUE	reported	textfile	TRUE	0.000727397	10.7253	7.50309
	rs2618132	A	G	A	G	0.0927	-0.100176	0.9536	0.0268472	FALSE	FALSE	FALSE	CffBSP	92577670	0.168312	0.0727153	TRUE	reported	textfile	8	93589898	0.0283	0.00105	14734	GCST90274759.txt	TRUE	reported	textfile	TRUE	0.000727696	10.7282	7.50309
	rs2623815	A	T	A	T	-0.054	-0.0334201	0.7838	0.700588	FALSE	TRUE	FALSE	CffBSP	67789765	0.195321	0.0258071	TRUE	reported	textfile	8	68702000	0.0139	0.000102	14720	GCST90274759.txt	TRUE	reported	textfile	TRUE	0.00102425	15.0903	7.50309
	rs265273	A	C	A	C	-0.0864	-0.027123	0.0879	0.901578	FALSE	FALSE	FALSE	CffBSP	1467685	0.504516	0.0406398	TRUE	reported	textfile	19	1467684	0.0264	0.00107	13224	GCST90274759.txt	TRUE	reported	textfile	TRUE	0.000809292	10.7091	7.50309
	rs2726871	T	G	T	G	0.0654	0.0615909	0.1514	0.750166	FALSE	FALSE	FALSE	CffBSP	108823116	0.0239359	0.0272749	TRUE	reported	textfile	11	108693843	0.0169	0.000109	14288	GCST90274759.txt	TRUE	reported	textfile	TRUE	0.00104702	14.9734	7.50309
	rs2740524	C	G	C	G	-0.0413	-0.0231713	0.7152	0.609006	FALSE	TRUE	FALSE	CffBSP	50019696	0.338246	0.0241964	TRUE	reported	textfile	13	50593832	0.0126	0.00105	14714	GCST90274759.txt	TRUE	reported	textfile	TRUE	0.000729644	10.7424	7.50309
	rs2833289	A	G	A	G	0.0812	-0.0475234	0.9413	0.054771	FALSE	FALSE	FALSE	CffBSP	31131024	0.35104	0.0509594	TRUE	reported	textfile	21	32503342	0.0247	0.00101	14734	GCST90274759.txt	TRUE	reported	textfile	TRUE	0.000732958	10.8059	7.50309
	rs2836422	A	T	A	T	0.0467	0.0619841	0.5918	0.565645	FALSE	TRUE	TRUE	CffBSP	38466112	0.00881029	0.0236641	TRUE	reported	textfile	21	39838035	0.0122	0.000129	14288	GCST90274759.txt	TRUE	reported	textfile	FALSE	0.00102447	14.6505	7.50309
	rs2841989	T	G	T	G	0.0479	-0.006656	0.8249	0.1738	FALSE	FALSE	FALSE	CffBSP	163123592	0.829156	0.0308456	TRUE	reported	textfile	1	163093382	0.0151	0.00151	14735	GCST90274759.txt	TRUE	reported	textfile	TRUE	0.000682449	10.0614	7.50309
	rs28592133	T	C	T	C	-0.1524	-0.0670351	0.9732	0.00405158	FALSE	FALSE	FALSE	CffBSP	98883231	0.713188	0.18237	TRUE	reported	textfile	15	99426460	0.0394	0.00011	13843	GCST90274759.txt	TRUE	reported	textfile	TRUE	0.00107964	14.9594	7.50309
	rs28680801	A	C	A	C	0.0513	-0.011671	0.8315	0.165604	FALSE	FALSE	FALSE	CffBSP	157205354	0.713947	0.031839	TRUE	reported	textfile	4	158126506	0.0156	0.00101	14725	GCST90274759.txt	TRUE	reported	textfile	TRUE	0.000733857	10.8125	7.50309
	rs28766045	T	G	T	G	-0.052	0.0394375	0.269	0.716168	FALSE	FALSE	FALSE	CffBSP	69266305	0.132742	0.0262326	TRUE	reported	textfile	7	68731292	0.0138	0.000164	14287	GCST90274759.txt	TRUE	reported	textfile	TRUE	0.000992833	14.1967	7.50309
	rs28851894	A	C	A	C	0.1125	0.132261	0.0371	0.982437	FALSE	FALSE	FALSE	CffBSP	178820694	0.154438	0.0928782	TRUE	reported	textfile	5	178247695	0.0348	0.00123	14288	GCST90274759.txt	TRUE	reported	textfile	TRUE	0.000730899	10.4493	7.50309
	rs2896074	C	G	C	G	-0.0381	-0.0225417	0.4427	0.442492	FALSE	TRUE	TRUE	CffBSP	88089100	0.342235	0.0237342	TRUE	reported	textfile	14	88555444	0.0116	0.00102	14712	GCST90274759.txt	TRUE	reported	textfile	FALSE	0.00073273	10.7864	7.50309
	rs2920654	A	G	A	G	0.0407	0.00681807	0.3625	0.579039	FALSE	FALSE	FALSE	CffBSP	6342437	0.775684	0.0239274	TRUE	reported	textfile	8	6199958	0.0125	0.00113	14288	GCST90274759.txt	TRUE	reported	textfile	TRUE	0.000741439	10.6001	7.50309
	rs2947356	C	G	C	G	-0.0484	-0.0103166	0.3407	0.329027	FALSE	TRUE	FALSE	CffBSP	12926257	0.681324	0.0251223	TRUE	reported	textfile	8	12783766	0.0125	0.000108	14288	GCST90274759.txt	TRUE	reported	textfile	TRUE	0.0010482	14.9903	7.50309
	rs3064899	CAA	C	G	GT	0.0626	-0.0151557	0.6612	0.00875524	TRUE	FALSE	FALSE	CffBSP	22250390	0.904219	0.125948	TRUE	reported	textfile	6	22250619	0.0145	1.58e-05	10894	GCST90274759.txt	TRUE	reported	textfile	FALSE	0.00170798	18.6352	7.50309
	rs306703	T	C	T	C	-0.0377	0.0156532	0.4402	0.57377	FALSE	FALSE	FALSE	CffBSP	80262491	0.510111	0.0237651	TRUE	reported	textfile	7	79891807	0.0115	0.00104	14736	GCST90274759.txt	TRUE	reported	textfile	TRUE	0.000728771	10.7455	7.50309
	rs3094518	T	C	T	C	0.2196	0.329992	0.0186	0.993739	FALSE	FALSE	FALSE	CffBSP	37682888	0.0306302	0.152644	TRUE	reported	textfile	17	36042891	0.058	0.000153	13801	GCST90274759.txt	TRUE	reported	textfile	TRUE	0.00103764	14.3333	7.50309
	rs3094778	T	C	T	C	-0.0518	-0.00658235	0.7262	0.293503	FALSE	FALSE	FALSE	CffBSP	2758362	0.799639	0.0259337	TRUE	reported	textfile	16	2808363	0.0135	0.000125	14287	GCST90274759.txt	TRUE	reported	textfile	TRUE	0.00102945	14.7208	7.50309
	rs3100801	T	C	T	C	0.0598	0.0143445	0.1819	0.826502	FALSE	FALSE	FALSE	CffBSP	59760846	0.64237	0.030889	TRUE	reported	textfile	3	59746572	0.0183	0.00108	12404	GCST90274759.txt	TRUE	reported	textfile	TRUE	0.000860131	10.6765	7.50309
	rs310433	T	C	T	C	-0.0428	0.0298328	0.7051	0.342819	FALSE	FALSE	FALSE	CffBSP	55553556	0.23011	0.024859	TRUE	reported	textfile	19	56064922	0.0133	0.00129	14287	GCST90274759.txt	TRUE	reported	textfile	TRUE	0.000724317	10.3544	7.50309
	rs330632	C	G	C	G	-0.0926	0.0277588	0.0678	0.0914077	FALSE	TRUE	FALSE	CffBSP	150090655	0.501522	0.0413018	TRUE	reported	textfile	2	150947169	0.0246	0.000167	14288	GCST90274759.txt	TRUE	reported	textfile	TRUE	0.000990718	14.1674	7.50309
	rs337426	A	G	A	G	0.0482	-0.00428755	0.3857	0.656145	FALSE	FALSE	FALSE	CffBSP	27936654	0.863861	0.0250059	TRUE	reported	textfile	3	27978145	0.0125	0.000115	14288	GCST90274759.txt	TRUE	reported	textfile	TRUE	0.00103956	14.8667	7.50309
	rs34035622	G	GGAA	G	GGAA	-0.1846	-0.157265	0.9794	0.00866424	FALSE	FALSE	FALSE	CffBSP	183555843	0.222245	0.128844	TRUE	reported	textfile	1	183524978	0.0487	0.00015	11333	GCST90274759.txt	TRUE	reported	textfile	TRUE	0.00126622	14.3658	7.50309
	rs34117451	T	C	T	C	-0.0584	0.0458694	0.1745	0.76132	FALSE	FALSE	FALSE	CffBSP	3123508	0.101309	0.027994	TRUE	reported	textfile	12	3232674	0.0152	0.000122	14718	GCST90274759.txt	TRUE	reported	textfile	TRUE	0.00100197	14.7598	7.50309
	rs34197556	T	G	T	G	0.0548	-0.0248943	0.136	0.854575	FALSE	FALSE	FALSE	CffBSP	23983979	0.453027	0.0331757	TRUE	reported	textfile	4	23985602	0.0168	0.00111	14721	GCST90274759.txt	TRUE	reported	textfile	TRUE	0.000722256	10.6386	7.50309
	rs34220107	A	C	A	C	-0.0949	0.0153203	0.0426	0.960166	FALSE	FALSE	FALSE	CffBSP	237559564	0.796661	0.0594569	TRUE	reported	textfile	1	237722864	0.0289	0.00102	14735	GCST90274759.txt	TRUE	reported	textfile	TRUE	0.000731255	10.7815	7.50309
	rs34420811	C	G	C	G	-0.0609	0.021073	0.1131	0.0599203	FALSE	TRUE	FALSE	CffBSP	101048577	0.66699	0.0489746	TRUE	reported	textfile	1	101514133	0.0188	0.0012	14288	GCST90274759.txt	TRUE	reported	textfile	TRUE	0.000733886	10.492	7.50309
	rs34478996	T	C	T	C	0.0618	-0.022111	0.1513	0.87271	FALSE	FALSE	FALSE	CffBSP	48471718	0.531845	0.0353667	TRUE	reported	textfile	12	48865501	0.016	0.000112	14736	GCST90274759.txt	TRUE	reported	textfile	TRUE	0.00101139	14.9169	7.50309
	rs34536038	A	G	A	G	0.0409	0.0382284	0.664	0.332655	FALSE	FALSE	FALSE	CffBSP	98285434	0.128696	0.0251625	TRUE	reported	textfile	8	99297662	0.0128	0.0014	14288	GCST90274759.txt	TRUE	reported	textfile	TRUE	0.000714077	10.2086	7.50309
	rs34589360	T	C	T	C	-0.0479	-0.00103106	0.7911	0.176759	FALSE	FALSE	FALSE	CffBSP	67495248	0.973304	0.0308109	TRUE	reported	textfile	17	65491364	0.0147	0.00112	14288	GCST90274759.txt	TRUE	reported	textfile	TRUE	0.000742578	10.6164	7.50309
	rs34618783	A	G	A	G	0.139	-0.0694325	0.0319	0.964376	FALSE	FALSE	FALSE	CffBSP	23380080	0.282716	0.0646342	TRUE	reported	textfile	16	23391401	0.0425	0.00107	13224	GCST90274759.txt	TRUE	reported	textfile	TRUE	0.000808235	10.6951	7.50309
	rs34729826	A	G	A	G	0.0541	-0.0613114	0.8638	0.109116	FALSE	FALSE	FALSE	CffBSP	73894349	0.107605	0.0381041	TRUE	reported	textfile	5	73190174	0.0171	0.00156	14733	GCST90274759.txt	TRUE	reported	textfile	TRUE	0.000678916	10.0079	7.50309
	rs35176212	T	C	T	C	-0.0386	0.00706794	0.6546	0.283223	FALSE	FALSE	FALSE	CffBSP	59906577	0.786084	0.0260425	TRUE	reported	textfile	14	60373295	0.012	0.0013	14728	GCST90274759.txt	TRUE	reported	textfile	TRUE	0.000702042	10.3455	7.50309
	rs35320312	A	G	A	G	0.0693	-0.00427566	0.0884	0.927635	FALSE	FALSE	FALSE	CffBSP	537468	0.925771	0.0458925	TRUE	reported	textfile	17	440708	0.0211	0.00102	14712	GCST90274759.txt	TRUE	reported	textfile	TRUE	0.000732675	10.7856	7.50309
	rs35390686	T	C	T	C	-0.1214	-0.163841	0.0397	0.965968	FALSE	FALSE	FALSE	CffBSP	7105189	0.0111117	0.0645256	TRUE	reported	textfile	8	6962711	0.0375	0.00121	14288	GCST90274759.txt	TRUE	reported	textfile	TRUE	0.000732968	10.4789	7.50309
	rs35529225	CT	C	CT	C	-0.0612	0.0625543	0.1419	0.902524	FALSE	FALSE	FALSE	CffBSP	89569843	0.111264	0.0392797	TRUE	reported	textfile	13	90222097	0.0187	0.00107	11342	GCST90274759.txt	TRUE	reported	textfile	TRUE	0.000943453	10.7089	7.50309
	rs356084	T	C	T	C	0.1708	-0.0273198	0.9838	0.017786	FALSE	FALSE	FALSE	CffBSP	55526658	0.753519	0.0870051	TRUE	reported	textfile	1	55992331	0.054	0.00156	14288	GCST90274759.txt	TRUE	reported	textfile	TRUE	0.000699701	10.0029	7.50309
	rs35706383	A	G	A	G	-0.1818	0.00156128	0.0192	0.987936	FALSE	FALSE	FALSE	CffBSP	29721606	0.987984	0.103665	TRUE	reported	textfile	16	29732927	0.0486	0.000183	13215	GCST90274759.txt	TRUE	reported	textfile	TRUE	0.00105776	13.991	7.50309
	rs35843780	A	T	A	T	-0.0523	-0.00482289	0.7732	0.732631	FALSE	TRUE	FALSE	CffBSP	5369313	0.856889	0.0267439	TRUE	reported	textfile	16	5419314	0.0163	0.00133	11337	GCST90274759.txt	TRUE	reported	textfile	TRUE	0.000907268	10.2932	7.50309
	rs35869280	CA	C	CA	C	-0.041	0.0108861	0.5182	0.420078	FALSE	FALSE	FALSE	CffBSP	163126653	0.647827	0.0238321	TRUE	reported	textfile	5	162553659	0.0128	0.00136	11337	GCST90274759.txt	TRUE	reported	textfile	TRUE	0.000904184	10.2582	7.50309
	rs373593632	T	C	T	C	0.2075	0.302807	0.9849	0.0120743	FALSE	FALSE	FALSE	CffBSP	45574624	0.0019173	0.0975931	TRUE	reported	textfile	4	45576641	0.0537	0.000112	12202	GCST90274759.txt	TRUE	reported	textfile	TRUE	0.00122215	14.9285	7.50309
	rs3751423	T	C	T	C	-0.1819	0.0105384	0.0252	0.984891	FALSE	FALSE	FALSE	CffBSP	19181898	0.915137	0.0988941	TRUE	reported	textfile	13	19756038	0.0425	1.87e-05	14729	GCST90274759.txt	TRUE	reported	textfile	TRUE	0.00124215	18.3159	7.50309
	rs3764693	A	C	A	C	0.0392	-0.0285191	0.3284	0.64287	FALSE	FALSE	FALSE	CffBSP	46608605	0.247515	0.0246618	TRUE	reported	textfile	20	45237244	0.0123	0.00144	14712	GCST90274759.txt	TRUE	reported	textfile	TRUE	0.000689907	10.1555	7.50309
	rs3769402	A	T	A	T	-0.0574	0.0034675	0.8748	0.840519	FALSE	TRUE	FALSE	CffBSP	168142834	0.91495	0.0324682	TRUE	reported	textfile	2	168999344	0.0175	0.00104	14720	GCST90274759.txt	TRUE	reported	textfile	TRUE	0.000730336	10.7569	7.50309
	rs3781577	A	G	A	G	-0.0429	0.00680719	0.2515	0.834791	FALSE	FALSE	FALSE	CffBSP	33884938	0.829609	0.0316315	TRUE	reported	textfile	11	33906484	0.0135	0.00148	14731	GCST90274759.txt	TRUE	reported	textfile	TRUE	0.000685042	10.0969	7.50309
	rs3803585	A	G	A	G	-0.0657	0.00708094	0.1779	0.734792	FALSE	FALSE	FALSE	CffBSP	58161728	0.790233	0.0266191	TRUE	reported	textfile	16	58195632	0.0152	1.54e-05	14736	GCST90274759.txt	TRUE	reported	textfile	TRUE	0.00126623	18.6803	7.50309
	rs3847690	T	C	T	C	0.0422	-0.00201041	0.6338	0.297322	FALSE	FALSE	FALSE	CffBSP	131041011	0.938018	0.0258539	TRUE	reported	textfile	12	131525556	0.0129	0.00107	14288	GCST90274759.txt	TRUE	reported	textfile	TRUE	0.000748426	10.7	7.50309
	rs3861901	A	G	A	G	-0.0497	-0.0272956	0.8383	0.198563	FALSE	FALSE	FALSE	CffBSP	117475729	0.354996	0.0295106	TRUE	reported	textfile	12	117913534	0.0156	0.00144	14725	GCST90274759.txt	TRUE	reported	textfile	TRUE	0.000688825	10.1486	7.50309
	rs39379	A	C	A	C	-0.0547	0.0145074	0.1888	0.752172	FALSE	FALSE	FALSE	CffBSP	103838622	0.593096	0.0271493	TRUE	reported	textfile	7	103479069	0.0147	0.000198	14728	GCST90274759.txt	TRUE	reported	textfile	TRUE	0.000939265	13.8446	7.50309
	rs4017384	A	T	A	T	0.2266	-0.0540154	0.9861	0.987727	FALSE	TRUE	FALSE	CffBSP	21775479	0.625626	0.110712	TRUE	reported	textfile	16	21786800	0.0605	0.00018	12404	GCST90274759.txt	TRUE	reported	textfile	TRUE	0.00112968	14.0262	7.50309
	rs4110325	A	G	A	G	-0.0572	0.0122465	0.721	0.326173	FALSE	FALSE	FALSE	CffBSP	103989107	0.627596	0.0252446	TRUE	reported	textfile	4	104910264	0.0133	1.7e-05	14287	GCST90274759.txt	TRUE	reported	textfile	TRUE	0.00129296	18.4939	7.50309
	rs4242941	T	C	T	C	0.0531	-0.00211307	0.5763	0.450793	FALSE	FALSE	FALSE	CffBSP	68880176	0.92924	0.0237956	TRUE	reported	textfile	13	69454308	0.0123	1.58e-05	12835	GCST90274759.txt	TRUE	reported	textfile	TRUE	0.00144995	18.6342	7.50309
	rs4278382	A	G	A	G	-0.0497	0.0171792	0.7325	0.245182	FALSE	FALSE	FALSE	CffBSP	161285988	0.527934	0.0272183	TRUE	reported	textfile	1	161255778	0.0129	0.000117	14735	GCST90274759.txt	TRUE	reported	textfile	TRUE	0.00100634	14.8414	7.50309
	rs4305659	T	C	T	C	0.068	-0.0309912	0.909	0.0971494	FALSE	FALSE	FALSE	CffBSP	121148702	0.431814	0.0394244	TRUE	reported	textfile	5	120484397	0.0207	0.00102	14288	GCST90274759.txt	TRUE	reported	textfile	TRUE	0.000754706	10.7899	7.50309
	rs4317886	A	C	A	C	-0.0472	0.00385898	0.4683	0.542666	FALSE	FALSE	FALSE	CffBSP	17163598	0.869717	0.0235277	TRUE	reported	textfile	10	17205597	0.0122	0.000109	12838	GCST90274759.txt	TRUE	reported	textfile	TRUE	0.00116456	14.9657	7.50309
	rs4320015	A	G	A	G	0.0448	0.00306517	0.5686	0.399018	FALSE	FALSE	FALSE	CffBSP	17458530	0.898525	0.024036	TRUE	reported	textfile	21	18830848	0.0117	0.000129	14733	GCST90274759.txt	TRUE	reported	textfile	TRUE	0.000994171	14.6597	7.50309
	rs4346577	T	C	T	C	0.0494	-0.00973294	0.286	0.713717	FALSE	FALSE	FALSE	CffBSP	196621507	0.709075	0.0260867	TRUE	reported	textfile	3	196348378	0.0152	0.00115	10282	GCST90274759.txt	TRUE	reported	textfile	TRUE	0.00102623	10.5604	7.50309
	rs4406103	A	T	A	T	0.0568	-0.0279143	0.8453	0.803476	FALSE	TRUE	FALSE	CffBSP	68981716	0.349029	0.0298079	TRUE	reported	textfile	5	68277543	0.0177	0.00133	12404	GCST90274759.txt	TRUE	reported	textfile	TRUE	0.000829522	10.2963	7.50309
	rs4523641	A	G	A	G	0.0452	0.0417595	0.7572	0.223154	FALSE	FALSE	FALSE	CffBSP	83451132	0.138789	0.0282099	TRUE	reported	textfile	10	85210888	0.0139	0.00115	14288	GCST90274759.txt	TRUE	reported	textfile	TRUE	0.000739528	10.5727	7.50309
	rs453137	A	G	A	G	-0.0443	-0.040485	0.5935	0.43589	FALSE	FALSE	FALSE	CffBSP	3490548	0.0904649	0.0239138	TRUE	reported	textfile	18	3490546	0.0135	0.00103	12403	GCST90274759.txt	TRUE	reported	textfile	TRUE	0.000867434	10.7664	7.50309
	rs45547239	T	C	T	C	-0.0991	0.0108077	0.0374	0.979661	FALSE	FALSE	FALSE	CffBSP	204177365	0.89625	0.0828813	TRUE	reported	textfile	1	204146493	0.0308	0.00129	14734	GCST90274759.txt	TRUE	reported	textfile	TRUE	0.000702134	10.3511	7.50309
	rs4705282	T	G	T	G	-0.062	0.0193886	0.8541	0.152239	FALSE	FALSE	FALSE	CffBSP	148902146	0.553785	0.0327457	TRUE	reported	textfile	5	148281709	0.0164	0.000157	14721	GCST90274759.txt	TRUE	reported	textfile	TRUE	0.000969922	14.2901	7.50309
	rs4908599	C	G	C	G	-0.041	0.0129419	0.3427	0.29258	FALSE	TRUE	FALSE	CffBSP	7109675	0.620743	0.0261559	TRUE	reported	textfile	1	7169735	0.0127	0.00125	14288	GCST90274759.txt	TRUE	reported	textfile	TRUE	0.000728907	10.4208	7.50309
	rs4960963	T	C	T	C	-0.038	0.00294152	0.5399	0.516617	FALSE	FALSE	FALSE	CffBSP	89149163	0.901183	0.0236901	TRUE	reported	textfile	8	90161392	0.0116	0.00105	14735	GCST90274759.txt	TRUE	reported	textfile	TRUE	0.000727755	10.7298	7.50309
	rs4973368	A	G	A	G	-0.0499	0.00329501	0.2705	0.672869	FALSE	FALSE	FALSE	CffBSP	231017308	0.89542	0.0250668	TRUE	reported	textfile	2	231882023	0.0134	0.000196	14288	GCST90274759.txt	TRUE	reported	textfile	TRUE	0.000969614	13.8653	7.50309
	rs510121	T	C	T	C	-0.0427	0.0339167	0.2554	0.749973	FALSE	FALSE	FALSE	CffBSP	37717288	0.213781	0.027281	TRUE	reported	textfile	1	38182960	0.013	0.00102	14731	GCST90274759.txt	TRUE	reported	textfile	TRUE	0.000731845	10.7872	7.50309
	rs518751	C	G	C	G	0.0448	0.00259065	0.7316	0.696037	FALSE	TRUE	FALSE	CffBSP	25332116	0.919287	0.0255659	TRUE	reported	textfile	10	25621045	0.0139	0.00127	12844	GCST90274759.txt	TRUE	reported	textfile	TRUE	0.000808118	10.3863	7.50309
	rs55637355	T	C	T	C	0.0411	-0.0295727	0.2932	0.726753	FALSE	FALSE	FALSE	CffBSP	34692401	0.265731	0.0265715	TRUE	reported	textfile	15	34984602	0.0125	0.00101	14719	GCST90274759.txt	TRUE	reported	textfile	TRUE	0.00073395	10.8095	7.50309
	rs55680509	A	G	A	G	-0.0397	-0.0498642	0.326	0.751946	FALSE	FALSE	FALSE	CffBSP	3781810	0.0665518	0.0271785	TRUE	reported	textfile	18	3781810	0.0125	0.00149	14721	GCST90274759.txt	TRUE	reported	textfile	TRUE	0.000684741	10.0856	7.50309
	rs55686454	T	C	T	C	-0.2027	0.0603604	0.0129	0.985847	FALSE	FALSE	FALSE	CffBSP	150973300	0.543044	0.0992417	TRUE	reported	textfile	7	150670388	0.0633	0.00136	14288	GCST90274759.txt	TRUE	reported	textfile	TRUE	0.000717162	10.2527	7.50309
	rs55695437	T	C	T	C	-0.0743	0.0464228	0.0916	0.939851	FALSE	FALSE	FALSE	CffBSP	58828130	0.350027	0.0496746	TRUE	reported	textfile	5	58123957	0.023	0.00124	14288	GCST90274759.txt	TRUE	reported	textfile	TRUE	0.00072985	10.4342	7.50309
	rs55817703	T	C	T	C	0.1127	-0.0545627	0.0655	0.967171	FALSE	FALSE	FALSE	CffBSP	126231448	0.409592	0.0661677	TRUE	reported	textfile	9	128993727	0.0258	1.25e-05	14288	GCST90274759.txt	TRUE	reported	textfile	TRUE	0.0013337	19.0786	7.50309
	rs55818529	T	C	T	C	-0.1456	0.0747848	0.0342	0.972349	FALSE	FALSE	FALSE	CffBSP	36310411	0.301373	0.0723611	TRUE	reported	textfile	11	36331961	0.0335	1.38e-05	14721	GCST90274759.txt	TRUE	reported	textfile	TRUE	0.00128156	18.8875	7.50309
	rs56031203	A	G	A	G	-0.1527	-0.0532749	0.9761	0.0124513	FALSE	FALSE	FALSE	CffBSP	21274934	0.615225	0.105992	TRUE	reported	textfile	12	21427868	0.0401	0.00014	14730	GCST90274759.txt	TRUE	reported	textfile	TRUE	0.000983466	14.4987	7.50309
	rs56090739	C	G	C	G	-0.1103	0.0384371	0.0311	0.0396902	FALSE	TRUE	FALSE	CffBSP	87076753	0.520796	0.0598599	TRUE	reported	textfile	9	89691668	0.0337	0.00106	14734	GCST90274759.txt	TRUE	reported	textfile	TRUE	0.000726532	10.7111	7.50309
	rs56113429	A	C	A	C	0.0643	-0.0167502	0.0896	0.902219	FALSE	FALSE	FALSE	CffBSP	225802585	0.669405	0.0392308	TRUE	reported	textfile	1	225990287	0.0203	0.00154	14711	GCST90274759.txt	TRUE	reported	textfile	TRUE	0.00068154	10.0316	7.50309
	rs56220734	A	G	A	G	-0.0994	-0.0302818	0.0537	0.927487	FALSE	FALSE	FALSE	CffBSP	29682560	0.503838	0.0453006	TRUE	reported	textfile	8	29540076	0.0262	0.000148	14735	GCST90274759.txt	TRUE	reported	textfile	TRUE	0.000975879	14.3917	7.50309
	rs56247634	T	C	T	C	0.0368	0.0172002	0.4244	0.592494	FALSE	FALSE	FALSE	CffBSP	5923961	0.471758	0.0239017	TRUE	reported	textfile	3	5965648	0.0116	0.00151	14730	GCST90274759.txt	TRUE	reported	textfile	TRUE	0.000682779	10.0628	7.50309
	rs56253459	T	C	T	C	-0.0937	0.106394	0.0503	0.967155	FALSE	FALSE	FALSE	CffBSP	118012901	0.103194	0.0652898	TRUE	reported	textfile	5	117348596	0.0285	0.00101	14288	GCST90274759.txt	TRUE	reported	textfile	TRUE	0.000755944	10.8076	7.50309
	rs56315393	A	C	A	C	-0.0381	-0.0250959	0.5347	0.455124	FALSE	FALSE	FALSE	CffBSP	99251134	0.289141	0.0236752	TRUE	reported	textfile	15	99791339	0.0119	0.00137	14288	GCST90274759.txt	TRUE	reported	textfile	TRUE	0.000716924	10.2493	7.50309
	rs56354755	A	G	A	G	0.0506	-0.0023171	0.2291	0.822051	FALSE	FALSE	FALSE	CffBSP	165040599	0.940192	0.030883	TRUE	reported	textfile	5	164467605	0.0154	0.00102	12404	GCST90274759.txt	TRUE	reported	textfile	TRUE	0.000869601	10.7942	7.50309
	rs57011426	T	C	T	C	0.1304	-0.0330249	0.0254	0.986278	FALSE	FALSE	FALSE	CffBSP	126380617	0.743932	0.101101	TRUE	reported	textfile	3	126099460	0.0398	0.00105	14728	GCST90274759.txt	TRUE	reported	textfile	TRUE	0.000728331	10.7332	7.50309
	rs58535912	T	G	T	G	0.1274	0.23621	0.0258	0.989866	FALSE	FALSE	FALSE	CffBSP	109390273	0.0400811	0.115061	TRUE	reported	textfile	6	109711476	0.0388	0.00103	14730	GCST90274759.txt	TRUE	reported	textfile	TRUE	0.0007314	10.7799	7.50309
	rs5881768	A	AT	A	AT	0.0625	0.00856752	0.7986	0.154479	FALSE	FALSE	FALSE	CffBSP	168156070	0.795503	0.0330573	TRUE	reported	textfile	6	168556750	0.0164	0.000138	11340	GCST90274759.txt	TRUE	reported	textfile	TRUE	0.0012791	14.521	7.50309
	rs5899298	A	ACC	A	ACC	0.2551	-0.0233336	0.9888	0.0357469	FALSE	FALSE	FALSE	CffBSP	97000958	0.715196	0.0639476	TRUE	reported	textfile	9	99763240	0.0788	0.00121	7943	GCST90274759.txt	TRUE	reported	textfile	TRUE	0.00131768	10.4775	7.50309
	rs59029275	T	C	T	C	-0.1052	-0.0583899	0.0403	0.944078	FALSE	FALSE	FALSE	CffBSP	69431592	0.260067	0.0518453	TRUE	reported	textfile	15	69723931	0.032	0.00101	14288	GCST90274759.txt	TRUE	reported	textfile	TRUE	0.000755843	10.8061	7.50309
	rs59740167	T	C	T	C	-0.1127	-0.115568	0.0376	0.972752	FALSE	FALSE	FALSE	CffBSP	93890088	0.106024	0.0715007	TRUE	reported	textfile	7	93519400	0.0347	0.00116	14732	GCST90274759.txt	TRUE	reported	textfile	TRUE	0.000715511	10.547	7.50309
	rs59742217	T	C	T	C	-0.0875	-0.0384729	0.0924	0.918461	FALSE	FALSE	FALSE	CffBSP	140641984	0.375936	0.0434521	TRUE	reported	textfile	4	141563138	0.0226	0.000108	14288	GCST90274759.txt	TRUE	reported	textfile	TRUE	0.00104803	14.9878	7.50309
	rs60544386	T	C	T	C	0.1074	0.0301885	0.048	0.932681	FALSE	FALSE	FALSE	CffBSP	21696045	0.53124	0.0482157	TRUE	reported	textfile	8	21553557	0.0281	0.000132	14734	GCST90274759.txt	TRUE	reported	textfile	TRUE	0.000990478	14.6062	7.50309
	rs6057113	A	C	A	C	-0.1518	-0.0384931	0.025	0.965272	FALSE	FALSE	FALSE	CffBSP	1075342	0.554225	0.0650836	TRUE	reported	textfile	20	1055985	0.0392	0.000108	14288	GCST90274759.txt	TRUE	reported	textfile	TRUE	0.00104844	14.9938	7.50309
	rs60571656	A	T	A	T	-0.1568	-0.0567063	0.9761	0.986112	FALSE	TRUE	FALSE	CffBSP	61845784	0.574806	0.101083	TRUE	reported	textfile	4	62711502	0.0407	0.000117	14735	GCST90274759.txt	TRUE	reported	textfile	TRUE	0.00100627	14.8404	7.50309
	rs6079859	A	G	A	G	-0.0684	-0.0234982	0.1126	0.937815	FALSE	FALSE	FALSE	CffBSP	15506720	0.630604	0.0488653	TRUE	reported	textfile	20	15487365	0.0183	0.000186	14736	GCST90274759.txt	TRUE	reported	textfile	TRUE	0.00094715	13.9685	7.50309
	rs61179915	A	G	A	G	-0.158	-0.0617308	0.0162	0.984441	FALSE	FALSE	FALSE	CffBSP	26841651	0.515012	0.0948166	TRUE	reported	textfile	4	26843273	0.0488	0.0012	14728	GCST90274759.txt	TRUE	reported	textfile	TRUE	0.000711249	10.4813	7.50309
	rs612416	T	G	T	G	0.0733	-0.0352682	0.8857	0.0978599	FALSE	FALSE	FALSE	CffBSP	831493	0.397196	0.0416567	TRUE	reported	textfile	5	831608	0.0223	0.00101	13217	GCST90274759.txt	TRUE	reported	textfile	TRUE	0.00081679	10.8027	7.50309
	rs6126634	T	C	G	T	-0.0445	0.774371	0.2314	0.000986739	TRUE	FALSE	FALSE	CffBSP	52646703	0.00847637	0.29416	TRUE	reported	textfile	20	51263242	0.014	0.00148	13867	GCST90274759.txt	TRUE	reported	textfile	FALSE	0.000728057	10.1019	7.50309
	rs61360258	A	C	A	C	-0.0746	0.0342918	0.899	0.122938	FALSE	FALSE	FALSE	CffBSP	52936533	0.338119	0.0357995	TRUE	reported	textfile	12	53330317	0.0228	0.00107	11337	GCST90274759.txt	TRUE	reported	textfile	TRUE	0.000943409	10.7036	7.50309
	rs6136712	A	G	A	G	0.1489	0.00848961	0.9788	0.0143553	FALSE	FALSE	FALSE	CffBSP	2012347	0.931939	0.0994041	TRUE	reported	textfile	20	1992993	0.0453	0.00101	11785	GCST90274759.txt	TRUE	reported	textfile	TRUE	0.000915937	10.8024	7.50309
	rs61621155	C	G	C	G	0.1265	-0.132238	0.9653	0.989686	FALSE	TRUE	FALSE	CffBSP	90138563	0.267166	0.119175	TRUE	reported	textfile	10	91898320	0.0334	0.000152	14732	GCST90274759.txt	TRUE	reported	textfile	TRUE	0.000972756	14.3426	7.50309
	rs61813870	T	C	T	C	-0.089	-0.0744772	0.0514	0.981159	FALSE	FALSE	FALSE	CffBSP	152512029	0.391157	0.0868517	TRUE	reported	textfile	1	152484505	0.028	0.00148	14730	GCST90274759.txt	TRUE	reported	textfile	TRUE	0.00068543	10.1019	7.50309
	rs61879757	A	G	A	G	-0.1564	-0.179286	0.0218	0.998688	FALSE	FALSE	FALSE	CffBSP	17207953	0.595022	0.337275	TRUE	reported	textfile	11	17229500	0.0477	0.00104	13383	GCST90274759.txt	TRUE	reported	textfile	TRUE	0.000802665	10.7491	7.50309
	rs61881116	A	C	A	C	-0.0703	-0.0453285	0.9233	0.0946427	FALSE	FALSE	FALSE	CffBSP	69230483	0.250543	0.0394493	TRUE	reported	textfile	11	68997950	0.0219	0.00133	14724	GCST90274759.txt	TRUE	reported	textfile	TRUE	0.000699347	10.303	7.50309
	rs61891991	A	T	A	T	0.2416	-0.0336497	0.0121	0.00378182	FALSE	TRUE	FALSE	CffBSP	99368272	0.858049	0.188136	TRUE	reported	textfile	11	99239003	0.0628	0.00012	12935	GCST90274759.txt	TRUE	reported	textfile	TRUE	0.00114291	14.7981	7.50309
	rs61900897	C	G	C	G	-0.0482	0.0112523	0.3781	0.416983	FALSE	TRUE	FALSE	CffBSP	120547978	0.63873	0.0239678	TRUE	reported	textfile	11	120418687	0.0124	0.000101	14288	GCST90274759.txt	TRUE	reported	textfile	TRUE	0.00105638	15.1074	7.50309
	rs61907523	A	G	A	G	0.1393	-0.151404	0.0226	0.987132	FALSE	FALSE	FALSE	CffBSP	3338070	0.160584	0.107906	TRUE	reported	textfile	12	3447236	0.043	0.0012	14733	GCST90274759.txt	TRUE	reported	textfile	TRUE	0.000711811	10.4932	7.50309
	rs61926172	A	C	A	C	0.1496	0.13683	0.982	0.0106975	FALSE	FALSE	FALSE	CffBSP	32573137	0.222769	0.112229	TRUE	reported	textfile	12	32726071	0.0456	0.00104	14248	GCST90274759.txt	TRUE	reported	textfile	TRUE	0.000754834	10.7615	7.50309
	rs61949974	A	G	A	G	-0.0723	0.0318748	0.0717	0.950899	FALSE	FALSE	FALSE	CffBSP	64522794	0.560215	0.0547188	TRUE	reported	textfile	13	65096926	0.0221	0.00107	14733	GCST90274759.txt	TRUE	reported	textfile	TRUE	0.000725915	10.7012	7.50309
	rs61979365	T	C	T	C	0.0726	0.0499309	0.082	0.963685	FALSE	FALSE	FALSE	CffBSP	76334223	0.42474	0.0625524	TRUE	reported	textfile	14	76800566	0.0226	0.00132	14288	GCST90274759.txt	TRUE	reported	textfile	TRUE	0.000721724	10.318	7.50309
	rs62003316	A	G	A	G	-0.2149	0.0450299	0.0163	0.993378	FALSE	FALSE	FALSE	CffBSP	58051170	0.758758	0.146623	TRUE	reported	textfile	14	58517888	0.0571	0.000168	12792	GCST90274759.txt	TRUE	reported	textfile	TRUE	0.00110607	14.1623	7.50309
	rs62155122	T	C	T	C	-0.0782	-0.012143	0.073	0.92359	FALSE	FALSE	FALSE	CffBSP	83569032	0.784571	0.0444198	TRUE	reported	textfile	2	83796156	0.0238	0.00102	14288	GCST90274759.txt	TRUE	reported	textfile	TRUE	0.000755023	10.7944	7.50309
	rs62189875	A	G	A	G	0.0665	0.0405457	0.8894	0.095776	FALSE	FALSE	FALSE	CffBSP	238604762	0.317452	0.0405575	TRUE	reported	textfile	2	239513403	0.0203	0.00105	14288	GCST90274759.txt	TRUE	reported	textfile	TRUE	0.000750505	10.7298	7.50309
	rs62282536	T	C	T	C	-0.0727	0.0134184	0.9005	0.0580646	FALSE	FALSE	FALSE	CffBSP	110301656	0.798121	0.0524607	TRUE	reported	textfile	3	110020503	0.0225	0.00123	14288	GCST90274759.txt	TRUE	reported	textfile	TRUE	0.000730155	10.4386	7.50309
	rs62295122	A	G	A	G	-0.1123	0.0919027	0.0432	0.958212	FALSE	FALSE	FALSE	CffBSP	17536491	0.125665	0.0600112	TRUE	reported	textfile	4	17538114	0.0296	0.000148	14724	GCST90274759.txt	TRUE	reported	textfile	TRUE	0.000976621	14.3919	7.50309
	rs62319742	A	G	A	G	-0.1228	-0.0898612	0.055	0.926829	FALSE	FALSE	FALSE	CffBSP	123660107	0.0491711	0.045682	TRUE	reported	textfile	4	124581262	0.0257	1.77e-06	14730	GCST90274759.txt	TRUE	reported	textfile	TRUE	0.00154759	22.8282	7.50309
	rs62323863	A	G	A	G	-0.0791	-0.0263097	0.0784	0.905516	FALSE	FALSE	FALSE	CffBSP	101620090	0.516059	0.0405117	TRUE	reported	textfile	4	102541247	0.0242	0.00108	14288	GCST90274759.txt	TRUE	reported	textfile	TRUE	0.000747182	10.6822	7.50309
	rs62333213	A	C	A	C	0.0427	0.0213051	0.6433	0.345958	FALSE	FALSE	FALSE	CffBSP	2726455	0.389199	0.0247426	TRUE	reported	textfile	5	2726569	0.0132	0.00122	12207	GCST90274759.txt	TRUE	reported	textfile	TRUE	0.000856499	10.4625	7.50309
	rs62358105	A	G	A	G	0.1435	-0.0433449	0.0249	0.987838	FALSE	FALSE	FALSE	CffBSP	56878107	0.690001	0.108674	TRUE	reported	textfile	5	56173934	0.0378	0.000147	14730	GCST90274759.txt	TRUE	reported	textfile	TRUE	0.000977446	14.4099	7.50309
	rs62366856	C	G	C	G	-0.1386	0.0965505	0.0336	0.027112	FALSE	TRUE	FALSE	CffBSP	98312876	0.182034	0.0723486	TRUE	reported	textfile	5	97648580	0.0371	0.000187	14288	GCST90274759.txt	TRUE	reported	textfile	TRUE	0.00097585	13.9546	7.50309
	rs62407759	A	T	A	T	-0.074	0.0175718	0.9095	0.944386	FALSE	TRUE	FALSE	CffBSP	65688890	0.732034	0.0513163	TRUE	reported	textfile	6	66398783	0.0225	0.00101	12199	GCST90274759.txt	TRUE	reported	textfile	TRUE	0.000885909	10.815	7.50309
	rs62502072	T	C	T	C	-0.0461	-0.0291584	0.1987	0.792518	FALSE	FALSE	FALSE	CffBSP	27052167	0.311061	0.0287842	TRUE	reported	textfile	8	26909684	0.0144	0.00137	14732	GCST90274759.txt	TRUE	reported	textfile	TRUE	0.000695205	10.2475	7.50309
	rs62521920	A	G	A	G	-0.0496	-0.0452363	0.7914	0.217413	FALSE	FALSE	FALSE	CffBSP	143475094	0.113782	0.0286049	TRUE	reported	textfile	8	144557264	0.0156	0.00148	13224	GCST90274759.txt	TRUE	reported	textfile	TRUE	0.00076387	10.1076	7.50309
	rs6496856	C	G	C	G	-0.0567	0.00450337	0.1335	0.105672	FALSE	TRUE	FALSE	CffBSP	91692552	0.906165	0.038204	TRUE	reported	textfile	15	92235782	0.0176	0.00127	14288	GCST90274759.txt	TRUE	reported	textfile	TRUE	0.000725862	10.3772	7.50309
	rs6540600	C	G	C	G	-0.0388	-0.0483914	0.3633	0.432425	FALSE	TRUE	TRUE	CffBSP	210494407	0.04255	0.0238604	TRUE	reported	textfile	1	210667751	0.0118	0.00101	14736	GCST90274759.txt	TRUE	reported	textfile	FALSE	0.000733164	10.8104	7.50309
	rs6542764	T	C	T	C	0.0433	0.00063629	0.4273	0.499876	FALSE	FALSE	FALSE	CffBSP	108325806	0.97847	0.0235773	TRUE	reported	textfile	2	108942262	0.0115	0.000166	14730	GCST90274759.txt	TRUE	reported	textfile	TRUE	0.000961523	14.1749	7.50309
	rs6546568	T	C	T	C	0.0891	-0.100441	0.0605	0.950401	FALSE	FALSE	FALSE	CffBSP	70085848	0.0669175	0.0548188	TRUE	reported	textfile	2	70312980	0.0279	0.00141	11772	GCST90274759.txt	TRUE	reported	textfile	TRUE	0.000865607	10.197	7.50309
	rs6552971	A	G	A	G	-0.0385	-0.00665958	0.5139	0.573199	FALSE	FALSE	FALSE	CffBSP	186317234	0.780764	0.0239275	TRUE	reported	textfile	4	187238388	0.0119	0.00122	14287	GCST90274759.txt	TRUE	reported	textfile	TRUE	0.000732097	10.4657	7.50309
	rs6591668	T	C	T	C	0.1178	0.0267208	0.0521	0.953997	FALSE	FALSE	FALSE	CffBSP	61893641	0.638094	0.0568086	TRUE	reported	textfile	11	61661113	0.0303	0.000101	14734	GCST90274759.txt	TRUE	reported	textfile	TRUE	0.0010248	15.1128	7.50309
	rs6602500	A	C	A	C	0.0413	0.0305846	0.2719	0.684308	FALSE	FALSE	FALSE	CffBSP	11414046	0.230307	0.0254963	TRUE	reported	textfile	10	11456045	0.0129	0.00137	14724	GCST90274759.txt	TRUE	reported	textfile	TRUE	0.000695653	10.2485	7.50309
	rs6698040	T	C	T	C	-0.0434	-0.0533924	0.2503	0.660739	FALSE	FALSE	FALSE	CffBSP	154460472	0.0328481	0.0250206	TRUE	reported	textfile	1	154432948	0.0132	0.00101	14733	GCST90274759.txt	TRUE	reported	textfile	TRUE	0.000733199	10.8087	7.50309
	rs6698566	A	G	A	G	-0.039	0.000217478	0.48	0.619711	FALSE	FALSE	FALSE	CffBSP	81552342	0.992831	0.0242038	TRUE	reported	textfile	1	82018027	0.012	0.00115	14288	GCST90274759.txt	TRUE	reported	textfile	TRUE	0.000738711	10.561	7.50309
	rs6707684	A	G	A	G	-0.044	0.0602671	0.2455	0.814839	FALSE	FALSE	FALSE	CffBSP	31007078	0.0448126	0.0300373	TRUE	reported	textfile	2	31229944	0.0134	0.00102	14733	GCST90274759.txt	TRUE	reported	textfile	TRUE	0.000731285	10.7804	7.50309
	rs6714189	A	C	A	C	0.0532	0.00506757	0.772	0.271526	FALSE	FALSE	FALSE	CffBSP	75453675	0.849101	0.0266341	TRUE	reported	textfile	2	75680801	0.0137	0.000103	14725	GCST90274759.txt	TRUE	reported	textfile	TRUE	0.00102302	15.0773	7.50309
	rs6766548	A	G	A	G	0.168	-0.00616894	0.0133	0.988359	FALSE	FALSE	FALSE	CffBSP	45945507	0.954789	0.108811	TRUE	reported	textfile	3	45986999	0.0515	0.00111	14736	GCST90274759.txt	TRUE	reported	textfile	TRUE	0.000721624	10.6401	7.50309
	rs6901011	T	C	T	C	0.0783	0.0774996	0.8871	0.0720897	FALSE	FALSE	FALSE	CffBSP	128673055	0.0875205	0.0453579	TRUE	reported	textfile	6	128994200	0.0182	1.69e-05	14736	GCST90274759.txt	TRUE	reported	textfile	TRUE	0.00125446	18.5064	7.50309
	rs6905310	T	C	T	C	-0.0421	-0.0575409	0.6515	0.315344	FALSE	FALSE	FALSE	CffBSP	44068047	0.0247024	0.025619	TRUE	reported	textfile	6	44035784	0.013	0.0012	14288	GCST90274759.txt	TRUE	reported	textfile	TRUE	0.000733478	10.4862	7.50309
	rs6930663	A	G	A	G	-0.0816	0.0705388	0.9418	0.0507689	FALSE	FALSE	FALSE	CffBSP	5479644	0.17875	0.0524603	TRUE	reported	textfile	6	5479877	0.0254	0.00132	14736	GCST90274759.txt	TRUE	reported	textfile	TRUE	0.000699889	10.3194	7.50309
	rs6936003	T	C	T	C	-0.0906	0.0451256	0.0468	0.95924	FALSE	FALSE	FALSE	CffBSP	6385142	0.445791	0.0591849	TRUE	reported	textfile	6	6385375	0.0276	0.00103	14729	GCST90274759.txt	TRUE	reported	textfile	TRUE	0.00073105	10.7741	7.50309
	rs6943919	T	C	T	C	-0.0379	-0.0466377	0.4452	0.528278	FALSE	FALSE	FALSE	CffBSP	11779791	0.0478994	0.0235751	TRUE	reported	textfile	7	11819417	0.0116	0.00109	14729	GCST90274759.txt	TRUE	reported	textfile	TRUE	0.000724227	10.6734	7.50309
	rs7002952	T	C	T	C	0.1381	0.0238173	0.9794	0.0239489	FALSE	FALSE	FALSE	CffBSP	124019942	0.755931	0.0766251	TRUE	reported	textfile	8	125032182	0.0427	0.00122	14736	GCST90274759.txt	TRUE	reported	textfile	TRUE	0.000709323	10.4586	7.50309
	rs702206	A	G	A	G	-0.1199	-0.088403	0.9541	0.0515986	FALSE	FALSE	FALSE	CffBSP	18639457	0.100844	0.0538787	TRUE	reported	textfile	9	18639455	0.0278	1.61e-05	14735	GCST90274759.txt	TRUE	reported	textfile	TRUE	0.00126081	18.599	7.50309
	rs7040202	T	C	T	C	-0.0579	-0.00927681	0.7205	0.243684	FALSE	FALSE	FALSE	CffBSP	37712698	0.735612	0.027473	TRUE	reported	textfile	9	37712695	0.0133	1.34e-05	14288	GCST90274759.txt	TRUE	reported	textfile	TRUE	0.00132467	18.9493	7.50309
	rs7132044	A	G	A	G	-0.0475	0.017269	0.6047	0.362811	FALSE	FALSE	FALSE	CffBSP	130144428	0.487179	0.0248546	TRUE	reported	textfile	12	130628973	0.0126	0.000163	14288	GCST90274759.txt	TRUE	reported	textfile	TRUE	0.000993672	14.2097	7.50309
	rs7132139	A	G	A	G	-0.0378	-0.00467856	0.4698	0.550494	FALSE	FALSE	FALSE	CffBSP	83213842	0.843498	0.0236983	TRUE	reported	textfile	12	83607621	0.0115	0.00101	14736	GCST90274759.txt	TRUE	reported	textfile	TRUE	0.000732639	10.8026	7.50309
	rs71338865	T	C	T	C	-0.2398	-0.0490638	0.0091	0.994626	FALSE	FALSE	FALSE	CffBSP	118818559	0.767515	0.165965	TRUE	reported	textfile	6	119139722	0.0756	0.00151	11095	GCST90274759.txt	TRUE	reported	textfile	TRUE	0.000906012	10.0595	7.50309
	rs7141387	A	C	A	C	-0.039	0.0128381	0.5225	0.437789	FALSE	FALSE	FALSE	CffBSP	32600919	0.589335	0.023783	TRUE	reported	textfile	14	33070125	0.012	0.00115	14288	GCST90274759.txt	TRUE	reported	textfile	TRUE	0.000738711	10.561	7.50309
	rs71434703	A	G	A	G	0.1396	0.0311865	0.978	0.0273167	FALSE	FALSE	FALSE	CffBSP	29098968	0.675594	0.074523	TRUE	reported	textfile	13	29673105	0.0426	0.00105	14729	GCST90274759.txt	TRUE	reported	textfile	TRUE	0.000728554	10.7372	7.50309
	rs71621063	T	C	T	C	-0.0397	-0.0550046	0.4917	0.534664	FALSE	FALSE	FALSE	CffBSP	53139638	0.0196463	0.0235764	TRUE	reported	textfile	4	54005805	0.0123	0.00125	12837	GCST90274759.txt	TRUE	reported	textfile	TRUE	0.000810877	10.4161	7.50309
	rs7171442	T	C	T	C	-0.0684	-0.00306542	0.901	0.0621419	FALSE	FALSE	FALSE	CffBSP	57737006	0.950073	0.0489565	TRUE	reported	textfile	15	58029204	0.021	0.00113	14288	GCST90274759.txt	TRUE	reported	textfile	TRUE	0.000741959	10.6075	7.50309
	rs7197290	T	C	T	C	-0.0388	-0.0185123	0.5319	0.394569	FALSE	FALSE	FALSE	CffBSP	11452629	0.443035	0.0241335	TRUE	reported	textfile	16	11546485	0.012	0.00122	14288	GCST90274759.txt	TRUE	reported	textfile	TRUE	0.000731159	10.453	7.50309
	rs7213495	T	C	T	C	0.0395	-0.0094245	0.3293	0.719342	FALSE	FALSE	FALSE	CffBSP	8341660	0.71697	0.0259978	TRUE	reported	textfile	17	8244978	0.0121	0.0011	14720	GCST90274759.txt	TRUE	reported	textfile	TRUE	0.000723438	10.6553	7.50309
	rs72658508	A	G	A	G	0.0503	0.00333294	0.8286	0.113265	FALSE	FALSE	FALSE	CffBSP	100144672	0.929445	0.0376418	TRUE	reported	textfile	13	100796926	0.0153	0.00101	14727	GCST90274759.txt	TRUE	reported	textfile	TRUE	0.000733365	10.8067	7.50309
	rs72706317	T	C	T	C	-0.0475	0.00576898	0.1896	0.778513	FALSE	FALSE	FALSE	CffBSP	176054162	0.839728	0.0285251	TRUE	reported	textfile	4	176975313	0.015	0.00154	14732	GCST90274759.txt	TRUE	reported	textfile	TRUE	0.000680217	10.0264	7.50309
	rs72714637	T	C	T	C	-0.1139	0.0920393	0.0389	0.977531	FALSE	FALSE	FALSE	CffBSP	27747043	0.248048	0.0796805	TRUE	reported	textfile	9	27747041	0.0353	0.00125	14288	GCST90274759.txt	TRUE	reported	textfile	TRUE	0.000728132	10.4097	7.50309
	rs72724405	A	C	A	C	0.2015	0.172121	0.9852	0.0087301	FALSE	FALSE	FALSE	CffBSP	90977352	0.16433	0.123769	TRUE	reported	textfile	1	91442909	0.0525	0.000124	14736	GCST90274759.txt	TRUE	reported	textfile	TRUE	0.000998661	14.729	7.50309
	rs72731101	A	T	A	T	-0.0754	-0.0236808	0.1285	0.0947739	FALSE	TRUE	FALSE	CffBSP	215061758	0.558935	0.0405198	TRUE	reported	textfile	1	215235101	0.0194	0.000102	12934	GCST90274759.txt	TRUE	reported	textfile	TRUE	0.00116654	15.1033	7.50309
	rs72792394	T	G	T	G	-0.0709	0.0610053	0.1037	0.923613	FALSE	FALSE	FALSE	CffBSP	44658383	0.164889	0.0439262	TRUE	reported	textfile	2	44885522	0.0189	0.000176	14722	GCST90274759.txt	TRUE	reported	textfile	TRUE	0.000954964	14.0705	7.50309
	rs72797102	T	G	T	G	-0.0559	0.102596	0.8759	0.099296	FALSE	FALSE	FALSE	CffBSP	41608005	0.00772823	0.0385162	TRUE	reported	textfile	2	41835145	0.0176	0.00149	14734	GCST90274759.txt	TRUE	reported	textfile	TRUE	0.000684196	10.0865	7.50309
	rs72853580	A	C	A	C	-0.1654	0.00325967	0.0294	0.973414	FALSE	FALSE	FALSE	CffBSP	7781124	0.965091	0.0744786	TRUE	reported	textfile	11	7802671	0.0509	0.00116	11728	GCST90274759.txt	TRUE	reported	textfile	TRUE	0.00089954	10.5575	7.50309
	rs72873479	A	G	A	G	-0.1743	0.161153	0.9824	0.0095089	FALSE	FALSE	FALSE	CffBSP	23701911	0.186428	0.121973	TRUE	reported	textfile	11	23723457	0.0538	0.0012	13801	GCST90274759.txt	TRUE	reported	textfile	TRUE	0.000759958	10.4946	7.50309
	rs72874779	A	G	A	G	-0.1446	-0.0662538	0.0187	0.969077	FALSE	FALSE	FALSE	CffBSP	24507278	0.342936	0.06986	TRUE	reported	textfile	18	22087242	0.0445	0.00116	14733	GCST90274759.txt	TRUE	reported	textfile	TRUE	0.000716167	10.5574	7.50309
	rs72893280	A	C	A	C	-0.1904	-0.100992	0.0126	0.989328	FALSE	FALSE	FALSE	CffBSP	39889251	0.365194	0.11153	TRUE	reported	textfile	18	37469215	0.0602	0.00156	14288	GCST90274759.txt	TRUE	reported	textfile	TRUE	0.000699625	10.0018	7.50309
	rs72967002	T	C	T	C	0.0657	0.000869286	0.1836	0.837147	FALSE	FALSE	FALSE	CffBSP	224734603	0.978265	0.0319072	TRUE	reported	textfile	2	225599320	0.0154	1.99e-05	14288	GCST90274759.txt	TRUE	reported	textfile	TRUE	0.00127223	18.1982	7.50309
	rs72981434	T	C	T	C	-0.0723	-0.0882706	0.9258	0.0745572	FALSE	FALSE	FALSE	CffBSP	137513096	0.0461403	0.0442657	TRUE	reported	textfile	2	138270666	0.022	0.00101	14736	GCST90274759.txt	TRUE	reported	textfile	TRUE	0.000732375	10.7987	7.50309
	rs72993886	A	T	A	T	0.073	0.0489272	0.9237	0.932534	FALSE	TRUE	FALSE	CffBSP	146928060	0.298845	0.0470946	TRUE	reported	textfile	3	146645847	0.0222	0.00101	14720	GCST90274759.txt	TRUE	reported	textfile	TRUE	0.000734029	10.8114	7.50309
	rs73003099	T	C	T	C	0.0569	0.0317297	0.8706	0.10476	FALSE	FALSE	FALSE	CffBSP	158510057	0.416667	0.0390656	TRUE	reported	textfile	2	159366569	0.0173	0.00101	14735	GCST90274759.txt	TRUE	reported	textfile	TRUE	0.000733607	10.8162	7.50309
	rs73021632	A	G	A	G	0.0844	-0.123286	0.9349	0.0602267	FALSE	FALSE	FALSE	CffBSP	30235494	0.012485	0.0493513	TRUE	reported	textfile	19	30726401	0.0259	0.00112	14288	GCST90274759.txt	TRUE	reported	textfile	TRUE	0.000742662	10.6176	7.50309
	rs73024009	A	C	A	C	-0.2116	-0.18799	0.0154	0.985769	FALSE	FALSE	FALSE	CffBSP	8969222	0.056508	0.0985734	TRUE	reported	textfile	3	9010906	0.048	1.04e-05	14736	GCST90274759.txt	TRUE	reported	textfile	TRUE	0.00131703	19.4308	7.50309
	rs73029167	A	G	A	G	0.0927	-0.0664897	0.9548	0.0433299	FALSE	FALSE	FALSE	CffBSP	133556700	0.248022	0.0575585	TRUE	reported	textfile	11	133426595	0.0283	0.00105	14722	GCST90274759.txt	TRUE	reported	textfile	TRUE	0.000728288	10.7282	7.50309
	rs73040321	T	C	T	C	0.1625	0.0938283	0.0148	0.996242	FALSE	FALSE	FALSE	CffBSP	134578670	0.611668	0.184813	TRUE	reported	textfile	11	134448564	0.0505	0.00129	13382	GCST90274759.txt	TRUE	reported	textfile	TRUE	0.000773156	10.3528	7.50309
	rs73129213	T	C	T	C	0.1468	0.0311869	0.0186	0.988221	FALSE	FALSE	FALSE	CffBSP	79832776	0.77392	0.10857	TRUE	reported	textfile	5	79128599	0.0449	0.00108	14736	GCST90274759.txt	TRUE	reported	textfile	TRUE	0.000724878	10.6881	7.50309
	rs73140281	C	G	C	G	0.1064	-0.233045	0.9673	0.988466	FALSE	TRUE	FALSE	CffBSP	22345800	0.0258274	0.104561	TRUE	reported	textfile	3	22387291	0.0325	0.00106	14736	GCST90274759.txt	TRUE	reported	textfile	TRUE	0.00072681	10.7166	7.50309
	rs7315595	T	G	T	G	0.0457	0.0468464	0.7783	0.16289	FALSE	FALSE	FALSE	CffBSP	80550232	0.140451	0.0317794	TRUE	reported	textfile	12	80944011	0.0139	0.00101	14732	GCST90274759.txt	TRUE	reported	textfile	TRUE	0.0007332	10.808	7.50309
	rs73200193	A	G	A	G	0.0882	0.0346397	0.0936	0.869448	FALSE	FALSE	FALSE	CffBSP	5789870	0.324021	0.0351234	TRUE	reported	textfile	4	5791597	0.02	1.03e-05	14726	GCST90274759.txt	TRUE	reported	textfile	TRUE	0.00131892	19.4455	7.50309
	rs73238909	T	G	T	G	0.0792	0.0246965	0.9188	0.0619218	FALSE	FALSE	FALSE	CffBSP	35367478	0.621048	0.0499559	TRUE	reported	textfile	4	35369100	0.0242	0.00107	14288	GCST90274759.txt	TRUE	reported	textfile	TRUE	0.000749071	10.7092	7.50309
	rs73293441	T	C	T	C	-0.1618	0.146756	0.0226	0.980762	FALSE	FALSE	FALSE	CffBSP	59366637	0.0852825	0.0852825	TRUE	reported	textfile	20	57941692	0.0432	0.00018	14731	GCST90274759.txt	TRUE	reported	textfile	TRUE	0.000951358	14.0259	7.50309
	rs73397952	C	G	C	G	-0.0504	0.00196277	0.7627	0.784004	FALSE	TRUE	FALSE	CffBSP	37587052	0.945185	0.0285477	TRUE	reported	textfile	21	38959354	0.0135	0.000189	14718	GCST90274759.txt	TRUE	reported	textfile	TRUE	0.000946093	13.9359	7.50309
	rs73430075	A	G	A	G	0.1817	-0.250339	0.9853	0.00601097	FALSE	FALSE	FALSE	CffBSP	111680836	0.099878	0.15214	TRUE	reported	textfile	7	111320892	0.0555	0.00106	12935	GCST90274759.txt	TRUE	reported	textfile	TRUE	0.000827938	10.7166	7.50309
	rs73617409	A	G	A	G	-0.1313	0.0114991	0.2474	0.753985	FALSE	FALSE	FALSE	CffBSP	44672159	0.677916	0.0276881	TRUE	reported	textfile	20	43300800	0.0164	1.18e-15	12404	GCST90274759.txt	TRUE	reported	textfile	TRUE	0.00514093	64.0873	7.50309
	rs73701915	C	G	C	G	-0.1356	0.229471	0.9587	0.990566	FALSE	TRUE	FALSE	CffBSP	101517447	0.0615404	0.122739	TRUE	reported	textfile	8	102529675	0.0314	1.57e-05	14728	GCST90274759.txt	TRUE	reported	textfile	TRUE	0.00126464	18.6467	7.50309
	rs74180170	T	C	T	C	0.0505	-0.0412022	0.6764	0.312406	FALSE	FALSE	FALSE	CffBSP	11146581	0.110481	0.0258153	TRUE	reported	textfile	19	11257257	0.0135	0.000183	14288	GCST90274759.txt	TRUE	reported	textfile	TRUE	0.000978405	13.9912	7.50309
	rs74445827	A	T	A	T	-0.13	0.0459271	0.9692	0.982075	FALSE	TRUE	FALSE	CffBSP	230095468	0.600631	0.087732	TRUE	reported	textfile	1	230231215	0.0404	0.00129	14288	GCST90274759.txt	TRUE	reported	textfile	TRUE	0.000724166	10.3529	7.50309
	rs74505192	A	C	A	C	-0.08	0.00700201	0.0692	0.954294	FALSE	FALSE	FALSE	CffBSP	49069716	0.901958	0.0568399	TRUE	reported	textfile	16	49103627	0.0244	0.00104	14288	GCST90274759.txt	TRUE	reported	textfile	TRUE	0.0007518	10.7483	7.50309
	rs74667249	A	G	A	G	-0.102	0.000690881	0.0514	0.92775	FALSE	FALSE	FALSE	CffBSP	61280234	0.987953	0.0457578	TRUE	reported	textfile	12	61674015	0.0269	0.00015	14728	GCST90274759.txt	TRUE	reported	textfile	TRUE	0.000975278	14.376	7.50309
	rs7478201	T	C	T	C	0.0558	-0.00486022	0.248	0.78814	FALSE	FALSE	FALSE	CffBSP	5320539	0.866907	0.029001	TRUE	reported	textfile	10	5362502	0.0145	0.000119	14288	GCST90274759.txt	TRUE	reported	textfile	TRUE	0.00103541	14.8072	7.50309
	rs74829193	T	C	T	C	0.1149	-0.0498908	0.0379	0.979728	FALSE	FALSE	FALSE	CffBSP	34665546	0.556761	0.0848975	TRUE	reported	textfile	17	32992565	0.035	0.00103	14288	GCST90274759.txt	TRUE	reported	textfile	TRUE	0.000753711	10.7756	7.50309
	rs7501170	T	C	T	C	0.0861	-0.0219163	0.9019	0.0584663	FALSE	FALSE	FALSE	CffBSP	86447845	0.657691	0.049461	TRUE	reported	textfile	16	86481451	0.0199	1.51e-05	14724	GCST90274759.txt	TRUE	reported	textfile	TRUE	0.00126976	18.7172	7.50309
	rs75028206	T	C	T	C	0.1742	0.100429	0.0198	0.981882	FALSE	FALSE	FALSE	CffBSP	54805185	0.251459	0.087572	TRUE	reported	textfile	13	55379320	0.0456	0.000133	14736	GCST90274759.txt	TRUE	reported	textfile	TRUE	0.000989366	14.5918	7.50309
	rs7508052	T	C	T	C	0.0473	-0.0261933	0.5258	0.498007	FALSE	FALSE	FALSE	CffBSP	33769202	0.266365	0.0235663	TRUE	reported	textfile	19	34260107	0.0123	0.00012	14287	GCST90274759.txt	TRUE	reported	textfile	TRUE	0.001034	14.786	7.50309
	rs7513254	A	G	A	G	-0.0453	0.0160861	0.7747	0.221238	FALSE	FALSE	FALSE	CffBSP	3945869	0.568744	0.0282261	TRUE	reported	textfile	1	4005929	0.0139	0.00112	14735	GCST90274759.txt	TRUE	reported	textfile	TRUE	0.000720284	10.6196	7.50309
	rs751834	A	C	A	C	0.0467	0.0458393	0.6598	0.382116	FALSE	FALSE	FALSE	CffBSP	158844952	0.0593458	0.0243099	TRUE	reported	textfile	3	158562741	0.0125	0.000187	14288	GCST90274759.txt	TRUE	reported	textfile	TRUE	0.000975929	13.9557	7.50309
	rs7524411	T	C	T	C	-0.0415	-0.0300446	0.5821	0.420911	FALSE	FALSE	FALSE	CffBSP	13879641	0.20902	0.0239158	TRUE	reported	textfile	1	14206136	0.0131	0.00154	12404	GCST90274759.txt	TRUE	reported	textfile	TRUE	0.000808427	10.0342	7.50309
	rs75349712	T	C	T	C	-0.133	0.186389	0.0357	0.989322	FALSE	FALSE	FALSE	CffBSP	78524498	0.108894	0.116262	TRUE	reported	textfile	1	78990183	0.0347	0.000127	14288	GCST90274759.txt	TRUE	reported	textfile	TRUE	0.00102713	14.6887	7.50309
	rs75418075	T	C	T	C	0.2023	0.0217348	0.0158	0.985113	FALSE	FALSE	FALSE	CffBSP	90984414	0.820239	0.0956478	TRUE	reported	textfile	13	91636668	0.0536	0.00016	12888	GCST90274759.txt	TRUE	reported	textfile	TRUE	0.00110407	14.2428	7.50309
	rs75709826	T	G	T	G	0.1392	0.0887097	0.0211	0.994285	FALSE	FALSE	FALSE	CffBSP	29010815	0.56766	0.155222	TRUE	reported	textfile	22	29406803	0.0431	0.00124	14249	GCST90274759.txt	TRUE	reported	textfile	TRUE	0.000731512	10.4295	7.50309
	rs75747865	A	G	A	G	0.198	-0.0441828	0.9873	0.00148726	FALSE	FALSE	FALSE	CffBSP	78968824	0.883205	0.300751	TRUE	reported	textfile	9	81583740	0.0605	0.00107	13801	GCST90274759.txt	TRUE	reported	textfile	TRUE	0.000775483	10.7092	7.50309
	rs7596047	T	C	T	C	0.1788	-0.674803	0.9824	0.00316867	FALSE	FALSE	FALSE	CffBSP	387129	0.00574447	0.244315	TRUE	reported	textfile	2	387129	0.0462	0.000109	14735	GCST90274759.txt	TRUE	reported	textfile	TRUE	0.00101545	14.9759	7.50309
	rs76090013	A	G	A	G	-0.1125	0.145911	0.0376	0.986476	FALSE	FALSE	FALSE	CffBSP	85764370	0.146941	0.100599	TRUE	reported	textfile	4	86685523	0.0354	0.00148	14288	GCST90274759.txt	TRUE	reported	textfile	TRUE	0.00070635	10.0981	7.50309
	rs76114144	A	C	A	C	0.1138	0.0407899	0.0325	0.986832	FALSE	FALSE	FALSE	CffBSP	158284157	0.687836	0.10152	TRUE	reported	textfile	4	159205309	0.0349	0.00111	14736	GCST90274759.txt	TRUE	reported	textfile	TRUE	0.000721009	10.631	7.50309
	rs76343851	T	C	T	C	0.1297	-0.0296314	0.0222	0.967299	FALSE	FALSE	FALSE	CffBSP	33181188	0.653672	0.0660433	TRUE	reported	textfile	15	33473389	0.0402	0.00125	14730	GCST90274759.txt	TRUE	reported	textfile	TRUE	0.000706185	10.408	7.50309
	rs76418401	A	C	A	C	-0.907	-0.0315113	0.9299	0.0602499	FALSE	FALSE	FALSE	CffBSP	44604439	0.52016	0.0489992	TRUE	reported	textfile	20	43233080	0.0214	0	14727	GCST90274759.txt	TRUE	reported	textfile	TRUE	0.108715	1796.09	7.50309
	rs7660001	T	C	T	C	-0.0463	-0.0331511	0.2073	0.788065	FALSE	FALSE	FALSE	CffBSP	27609154	0.252597	0.0289766	TRUE	reported	textfile	4	27610776	0.0141	0.00102	14715	GCST90274759.txt	TRUE	reported	textfile	TRUE	0.000732226	10.7811	7.50309
	rs7682766	T	C	T	C	0.0366	0.000809814	0.4861	0.526297	FALSE	FALSE	FALSE	CffBSP	76104120	0.972588	0.0235663	TRUE	reported	textfile	4	77025273	0.0113	0.0012	14736	GCST90274759.txt	TRUE	reported	textfile	TRUE	0.000711404	10.4893	7.50309
	rs7690955	T	C	T	C	-0.0469	-0.0238376	0.2309	0.759316	FALSE	FALSE	FALSE	CffBSP	8337820	0.390375	0.0277525	TRUE	reported	textfile	4	8339547	0.0146	0.00132	12838	GCST90274759.txt	TRUE	reported	textfile	TRUE	0.000803144	10.3174	7.50309
	rs7691981	C	G	C	G	-0.0474	-0.0116081	0.6301	0.59609	FALSE	TRUE	FALSE	CffBSP	63635186	0.628212	0.0239714	TRUE	reported	textfile	4	64500904	0.0124	0.000132	14288	GCST90274759.txt	TRUE	reported	textfile	TRUE	0.00102164	14.6101	7.50309
	rs76922717	A	T	A	T	-0.1369	0.289442	0.9789	0.977905	FALSE	TRUE	FALSE	CffBSP	47916557	0.000672977	0.085121	TRUE	reported	textfile	14	48385760	0.0422	0.00118	14732	GCST90274759.txt	TRUE	reported	textfile	TRUE	0.000713855	10.5226	7.50309
	rs76986594	T	C	T	C	-0.0696	0.0448281	0.0914	0.950959	FALSE	FALSE	FALSE	CffBSP	104184094	0.405173	0.0538528	TRUE	reported	textfile	10	105943852	0.0216	0.00127	14736	GCST90274759.txt	TRUE	reported	textfile	TRUE	0.000704086	10.3813	7.50309
	rs77001568	C	G	C	G	-0.2993	-0.27642	0.9863	0.995062	FALSE	TRUE	FALSE	CffBSP	32646981	0.131475	0.183265	TRUE	reported	textfile	9	32646979	0.0678	1.01e-05	13422	GCST90274759.txt	TRUE	reported	textfile	TRUE	0.0014498	19.4845	7.50309
	rs77005041	A	G	A	G	-0.3203	0.107182	0.0122	0.969325	FALSE	FALSE	FALSE	CffBSP	101932660	0.125875	0.0700275	TRUE	reported	textfile	10	103692417	0.0855	0.00018	10908	GCST90274759.txt	TRUE	reported	textfile	TRUE	0.00128493	14.0314	7.50309
	rs77063378	A	T	A	T	-0.1111	-0.0842204	0.0326	0.015921	FALSE	TRUE	FALSE	CffBSP	152465621	0.364887	0.092949	TRUE	reported	textfile	6	152786756	0.0341	0.00112	14731	GCST90274759.txt	TRUE	reported	textfile	TRUE	0.000720069	10.6135	7.50309
	rs7710393	T	G	T	G	-0.114	-0.00559359	0.0357	0.975053	FALSE	FALSE	FALSE	CffBSP	111010257	0.941111	0.0757182	TRUE	reported	textfile	5	110345956	0.0352	0.0012	14288	GCST90274759.txt	TRUE	reported	textfile	TRUE	0.000733558	10.4873	7.50309
	rs77176564	T	C	T	C	-0.1654	-0.0998522	0.022	0.983107	FALSE	FALSE	FALSE	CffBSP	44002775	0.278422	0.0921254	TRUE	reported	textfile	3	44044267	0.0434	0.000138	14736	GCST90274759.txt	TRUE	reported	textfile	TRUE	0.000984655	14.5222	7.50309
	rs77176809	A	G	A	G	-0.1163	-0.022256	0.0287	0.961814	FALSE	FALSE	FALSE	CffBSP	170144915	0.721074	0.0623377	TRUE	reported	textfile	5	169571919	0.0354	0.00102	14735	GCST90274759.txt	TRUE	reported	textfile	TRUE	0.000731956	10.7918	7.50309
	rs77299922	A	G	A	G	0.1585	0.0561054	0.9806	0.00566628	FALSE	FALSE	FALSE	CffBSP	45603105	0.707372	0.14946	TRUE	reported	textfile	14	46072308	0.0486	0.00111	13801	GCST90274759.txt	TRUE	reported	textfile	TRUE	0.000770089	10.6346	7.50309
	rs77397420	C	G	C	G	-0.2028	-0.103485	0.0145	0.00231089	FALSE	TRUE	FALSE	CffBSP	188405771	0.65847	0.234116	TRUE	reported	textfile	4	189326925	0.0626	0.0012	13801	GCST90274759.txt	TRUE	reported	textfile	TRUE	0.000759883	10.4936	7.50309
	rs77518853	C	G	C	G	-0.1127	0.0303945	0.9675	0.987267	FALSE	TRUE	FALSE	CffBSP	55211915	0.772405	0.105087	TRUE	reported	textfile	2	55439051	0.0343	0.00102	14732	GCST90274759.txt	TRUE	reported	textfile	TRUE	0.000732284	10.7945	7.50309
	rs77678880	C	G	C	G	0.1237	0.12575	0.0273	0.0080494	FALSE	TRUE	FALSE	CffBSP	71458426	0.336709	0.130896	TRUE	reported	textfile	18	69125662	0.0377	0.00103	14727	GCST90274759.txt	TRUE	reported	textfile	TRUE	0.000730508	10.7646	7.50309
	rs7793526	A	G	A	G	-0.0592	-0.0111717	0.3435	0.685793	FALSE	FALSE	FALSE	CffBSP	22765989	0.66084	0.0254623	TRUE	reported	textfile	7	22805608	0.0122	1.22e-06	14732	GCST90274759.txt	TRUE	reported	textfile	TRUE	0.00159576	23.5432	7.50309
	rs78045036	A	G	A	G	-0.125	0.0100638	0.034	0.979669	FALSE	FALSE	FALSE	CffBSP	124800583	0.903027	0.0825999	TRUE	reported	textfile	9	127562862	0.0384	0.00113	12737	GCST90274759.txt	TRUE	reported	textfile	TRUE	0.000831245	10.5947	7.50309
	rs78110118	A	G	A	G	-0.1383	0.0305398	0.9752	0.0518272	FALSE	FALSE	FALSE	CffBSP	204875981	0.57527	0.0545056	TRUE	reported	textfile	1	204845109	0.0428	0.00123	13240	GCST90274759.txt	TRUE	reported	textfile	TRUE	0.000788	10.4398	7.50309
	rs78125692	T	C	T	C	0.0585	0.0690668	0.1142	0.913327	FALSE	FALSE	FALSE	CffBSP	70711133	0.095865	0.0414756	TRUE	reported	textfile	2	70938265	0.0181	0.00123	14731	GCST90274759.txt	TRUE	reported	textfile	TRUE	0.000708622	10.4447	7.50309
	rs78278900	A	G	A	G	0.0911	-0.00591072	0.0766	0.869137	FALSE	FALSE	FALSE	CffBSP	155764084	0.865118	0.034797	TRUE	reported	textfile	7	155556778	0.0279	0.00109	14288	GCST90274759.txt	TRUE	reported	textfile	TRUE	0.000745646	10.6603	7.50309
	rs7834053	A	C	A	C	0.0469	0.00485795	0.7887	0.232616	FALSE	FALSE	FALSE	CffBSP	51640764	0.862524	0.0280544	TRUE	reported	textfile	8	52553324	0.0148	0.00153	12851	GCST90274759.txt	TRUE	reported	textfile	TRUE	0.000780811	10.0405	7.50309
	rs78370485	A	G	A	G	0.208	0.0768735	0.01	0.981281	FALSE	FALSE	FALSE	CffBSP	40999652	0.39009	0.0894446	TRUE	reported	textfile	5	40999754	0.0642	0.0012	13801	GCST90274759.txt	TRUE	reported	textfile	TRUE	0.000760004	10.4953	7.50309
	rs78376616	A	T	A	T	0.1516	0.0186153	0.0161	0.0290387	FALSE	TRUE	FALSE	CffBSP	18515895	0.792178	0.0706509	TRUE	reported	textfile	7	18555518	0.0477	0.00148	14733	GCST90274759.txt	TRUE	reported	textfile	TRUE	0.00068513	10.0996	7.50309
	rs7844377	A	G	A	G	0.0376	0.00481654	0.4603	0.503913	FALSE	FALSE	FALSE	CffBSP	121353762	0.838136	0.0235784	TRUE	reported	textfile	8	122366002	0.0115	0.00108	14721	GCST90274759.txt	TRUE	reported	textfile	TRUE	0.00072565	10.6886	7.50309
	rs7849946	A	G	A	G	-0.045	-0.0347806	0.29	0.689384	FALSE	FALSE	FALSE	CffBSP	133721141	0.175273	0.0256598	TRUE	reported	textfile	9	136586263	0.0141	0.00142	11775	GCST90274759.txt	TRUE	reported	textfile	TRUE	0.000864272	10.1839	7.50309
	rs78547111	A	G	A	G	0.1571	-0.106676	0.9832	0.00709716	FALSE	FALSE	FALSE	CffBSP	60174318	0.450534	0.141382	TRUE	reported	textfile	15	60466517	0.0494	0.00147	14736	GCST90274759.txt	TRUE	reported	textfile	TRUE	0.000685837	10.1121	7.50309
	rs78708583	A	G	A	G	0.0688	-0.0170299	0.8667	0.138133	FALSE	FALSE	FALSE	CffBSP	28445085	0.62154	0.0344966	TRUE	reported	textfile	10	28734014	0.0183	0.00017	14288	GCST90274759.txt	TRUE	reported	textfile	TRUE	0.000988266	14.1323	7.50309
	rs78781419	A	G	A	G	0.1572	0.0682922	0.0299	0.943358	FALSE	FALSE	FALSE	CffBSP	91250021	0.196043	0.0528207	TRUE	reported	textfile	14	91716365	0.0357	1.07e-05	14732	GCST90274759.txt	TRUE	reported	textfile	TRUE	0.00131442	19.387	7.50309
	rs78969136	T	C	T	C	0.1654	0.0522536	0.0226	0.991449	FALSE	FALSE	FALSE	CffBSP	130675729	0.690688	0.131316	TRUE	reported	textfile	11	130545624	0.0441	0.000176	14736	GCST90274759.txt	TRUE	reported	textfile	TRUE	0.000953674	14.0648	7.50309
	rs78982012	A	C	A	C	-0.1241	-0.073448	0.9738	0.0121944	FALSE	FALSE	FALSE	CffBSP	24688648	0.494741	0.107571	TRUE	reported	textfile	3	24730139	0.0386	0.0013	14249	GCST90274759.txt	TRUE	reported	textfile	TRUE	0.000724886	10.3349	7.50309
	rs79037883	A	G	A	G	-0.1448	-0.182563	0.0194	0.989556	FALSE	FALSE	FALSE	CffBSP	68949770	0.122997	0.118369	TRUE	reported	textfile	9	71564686	0.0446	0.00117	14730	GCST90274759.txt	TRUE	reported	textfile	TRUE	0.000715079	10.5392	7.50309
	rs79082084	T	C	T	C	0.1611	0.0040462	0.9838	0.0314069	FALSE	FALSE	FALSE	CffBSP	169760583	0.95229	0.0676273	TRUE	reported	textfile	1	169729724	0.0504	0.00139	14728	GCST90274759.txt	TRUE	reported	textfile	TRUE	0.000693242	10.2158	7.50309
	rs79119738	A	G	A	G	0.1148	0.0384174	0.0396	0.971163	FALSE	FALSE	FALSE	CffBSP	39438124	0.586068	0.0705498	TRUE	reported	textfile	4	39439744	0.0307	0.000184	14736	GCST90274759.txt	TRUE	reported	textfile	TRUE	0.000948016	13.9813	7.50309
	rs79175769	A	G	A	G	0.0696	-0.040635	0.0803	0.92108	FALSE	FALSE	FALSE	CffBSP	127914350	0.347332	0.043239	TRUE	reported	textfile	3	127633193	0.0212	0.00103	14735	GCST90274759.txt	TRUE	reported	textfile	TRUE	0.000730936	10.7767	7.50309
	rs79179014	A	G	A	G	-0.0411	0.00811917	0.3796	0.616903	FALSE	FALSE	FALSE	CffBSP	71825338	0.735987	0.0240801	TRUE	reported	textfile	8	72737573	0.0125	0.00101	12837	GCST90274759.txt	TRUE	reported	textfile	TRUE	0.000841462	10.8093	7.50309
	rs79285319	T	C	T	C	0.1012	0.0337517	0.951	0.0322781	FALSE	FALSE	FALSE	CffBSP	186702073	0.613378	0.066801	TRUE	reported	textfile	2	187566800	0.0316	0.00136	14711	GCST90274759.txt	TRUE	reported	textfile	TRUE	0.000696694	10.2548	7.50309
	rs79326863	A	G	A	G	-0.2399	0.103956	0.0092	0.994288	FALSE	FALSE	FALSE	CffBSP	29296964	0.503197	0.155281	TRUE	reported	textfile	13	29871101	0.0751	0.0014	11961	GCST90274759.txt	TRUE	reported	textfile	TRUE	0.000852399	10.2025	7.50309
	rs79412838	T	C	T	C	0.2433	-0.0171926	0.9898	0.0104736	FALSE	FALSE	FALSE	CffBSP	6378136	0.883677	0.117508	TRUE	reported	textfile	4	6379863	0.0751	0.0012	12819	GCST90274759.txt	TRUE	reported	textfile	TRUE	0.000818078	10.4939	7.50309
	rs79548267	T	C	T	C	-0.1755	-0.0159409	0.0139	0.989891	FALSE	FALSE	FALSE	CffBSP	38504210	0.890035	0.115297	TRUE	reported	textfile	6	38471986	0.0539	0.00113	14245	GCST90274759.txt	TRUE	reported	textfile	TRUE	0.000743689	10.6002	7.50309
	rs79665997	T	C	T	C	-0.2532	-0.280233	0.0115	0.996654	FALSE	FALSE	FALSE	CffBSP	72609861	0.172285	0.205314	TRUE	reported	textfile	18	70277096	0.0654	0.000108	13383	GCST90274759.txt	TRUE	reported	textfile	TRUE	0.00111875	14.9867	7.50309
	rs79803985	A	T	A	T	0.1067	-0.0895897	0.0479	0.0458422	FALSE	TRUE	FALSE	CffBSP	81966387	0.116534	0.057082	TRUE	reported	textfile	10	83726143	0.0275	0.000104	14719	GCST90274759.txt	TRUE	reported	textfile	TRUE	0.00102174	15.0524	7.50309
	rs79949065	A	G	A	G	0.1173	-0.050018	0.0323	0.978311	FALSE	FALSE	FALSE	CffBSP	61631767	0.535696	0.0807609	TRUE	reported	textfile	8	62544326	0.0357	0.00102	14736	GCST90274759.txt	TRUE	reported	textfile	TRUE	0.000732086	10.7945	7.50309
	rs8001105	C	G	C	G	0.0532	0.0128478	0.7482	0.783693	FALSE	TRUE	FALSE	CffBSP	105593485	0.654234	0.0286854	TRUE	reported	textfile	13	106245834	0.0143	0.000199	14288	GCST90274759.txt	TRUE	reported	textfile	TRUE	0.000967741	13.8385	7.50309
	rs80126080	T	C	T	C	0.0453	0.00244979	0.7748	0.271774	FALSE	FALSE	FALSE	CffBSP	208608569	0.926324	0.0264925	TRUE	reported	textfile	2	209473294	0.0138	0.00103	14726	GCST90274759.txt	TRUE	reported	textfile	TRUE	0.000731199	10.7741	7.50309
	rs8026476	C	G	C	G	0.0948	0.00958493	0.0765	0.0540347	FALSE	TRUE	FALSE	CffBSP	82259786	0.854866	0.0524013	TRUE	reported	textfile	15	82552127	0.0221	1.79e-05	14736	GCST90274759.txt	TRUE	reported	textfile	TRUE	0.00124713	18.3981	7.50309
	rs8050050	A	G	A	G	-0.0594	-0.0262221	0.154	0.823504	FALSE	FALSE	FALSE	CffBSP	55701630	0.39523	0.0308433	TRUE	reported	textfile	16	55735542	0.0159	0.000187	14729	GCST90274759.txt	TRUE	reported	textfile	TRUE	0.00094666	13.9547	7.50309
	rs8057299	C	G	C	G	0.0377	-0.0529622	0.4058	0.396985	FALSE	TRUE	FALSE	CffBSP	13996965	0.028729	0.0242148	TRUE	reported	textfile	16	14090822	0.0118	0.0014	14721	GCST90274759.txt	TRUE	reported	textfile	TRUE	0.000692916	10.2061	7.50309
	rs805772	T	G	T	G	0.073	0.0150819	0.1561	0.821227	FALSE	FALSE	FALSE	CffBSP	5690814	0.627652	0.0310946	TRUE	reported	textfile	20	5671460	0.017	1.75e-05	14288	GCST90274759.txt	TRUE	reported	textfile	TRUE	0.00128889	18.4369	7.50309
	rs805814	A	C	A	C	0.0374	0.0540084	0.4318	0.559832	FALSE	FALSE	FALSE	CffBSP	123423254	0.0224916	0.0236675	TRUE	reported	textfile	7	123063308	0.0115	0.00115	14733	GCST90274759.txt	TRUE	reported	textfile	TRUE	0.000717372	10.5752	7.50309
	rs8065289	A	T	A	T	0.0538	0.0199578	0.1482	0.153869	FALSE	TRUE	FALSE	CffBSP	35477091	0.545104	0.032982	TRUE	reported	textfile	17	33804110	0.0165	0.00111	14288	GCST90274759.txt	TRUE	reported	textfile	TRUE	0.000743536	10.6301	7.50309
	rs8073069	C	G	C	G	0.0506	0.029543	0.2644	0.286577	FALSE	TRUE	FALSE	CffBSP	78213692	0.258162	0.026127	TRUE	reported	textfile	17	76209773	0.0156	0.00118	11337	GCST90274759.txt	TRUE	reported	textfile	TRUE	0.000927152	10.519	7.50309
	rs8080357	T	C	T	C	0.0498	-0.0378275	0.723	0.241822	FALSE	FALSE	FALSE	CffBSP	940321	0.17671	0.0280006	TRUE	reported	textfile	17	843561	0.0154	0.00122	14288	GCST90274759.txt	TRUE	reported	textfile	TRUE	0.000731355	10.4558	7.50309
	rs8119691	T	G	T	G	-0.0763	-0.0474403	0.0943	0.943474	FALSE	FALSE	FALSE	CffBSP	19221485	0.349493	0.0507073	TRUE	reported	textfile	20	19202129	0.0199	0.000126	14734	GCST90274759.txt	TRUE	reported	textfile	TRUE	0.000996757	14.6989	7.50309
	rs8470	T	C	T	C	-0.0559	-0.0271216	0.8062	0.258514	FALSE	FALSE	FALSE	CffBSP	177221099	0.310059	0.0267182	TRUE	reported	textfile	2	178085827	0.0145	0.000116	14718	GCST90274759.txt	TRUE	reported	textfile	TRUE	0.00100879	14.8603	7.50309
	rs9314908	T	G	T	G	-0.0433	0.0345134	0.2233	0.763877	FALSE	FALSE	FALSE	CffBSP	114257811	0.214377	0.0277971	TRUE	reported	textfile	13	115023286	0.0136	0.00145	14718	GCST90274759.txt	TRUE	reported	textfile	TRUE	0.000688256	10.1354	7.50309
	rs9376788	T	G	T	G	0.0387	-0.0262602	0.6271	0.380648	FALSE	FALSE	FALSE	CffBSP	143800358	0.278844	0.0242495	TRUE	reported	textfile	6	144121495	0.0119	0.00115	14732	GCST90274759.txt	TRUE	reported	textfile	TRUE	0.000717389	10.5747	7.50309
	rs9389161	A	G	A	G	0.0509	-0.0523368	0.2718	0.703886	FALSE	FALSE	FALSE	CffBSP	134349391	0.0436054	0.0259367	TRUE	reported	textfile	6	134670529	0.0135	0.000163	14288	GCST90274759.txt	TRUE	reported	textfile	TRUE	0.00099395	14.2137	7.50309
	rs9435886	T	C	T	C	-0.0804	-0.0628837	0.0586	0.950972	FALSE	FALSE	FALSE	CffBSP	248165711	0.25066	0.0547411	TRUE	reported	textfile	1	248329013	0.0247	0.00113	14736	GCST90274759.txt	TRUE	reported	textfile	TRUE	0.000718499	10.594	7.50309
	rs952527	A	G	A	G	0.0486	0.0222689	0.3062	0.697729	FALSE	FALSE	FALSE	CffBSP	126770805	0.384039	0.0255823	TRUE	reported	textfile	2	127528381	0.0125	0.000101	14731	GCST90274759.txt	TRUE	reported	textfile	TRUE	0.00102512	15.1145	7.50309
	rs9527164	T	C	T	C	-0.0431	-0.0128932	0.2293	0.799333	FALSE	FALSE	FALSE	CffBSP	54063674	0.658611	0.0291814	TRUE	reported	textfile	13	54637809	0.0136	0.00153	14735	GCST90274759.txt	TRUE	reported	textfile	TRUE	0.000681131	10.0419	7.50309
	rs954439	A	T	A	T	0.037	0.0169257	0.483	0.471464	FALSE	TRUE	TRUE	CffBSP	89306703	0.473894	0.023634	TRUE	reported	textfile	10	91066460	0.0115	0.00129	14730	GCST90274759.txt	TRUE	reported	textfile	FALSE	0.000702263	10.3502	7.50309
	rs956361	T	C	T	C	-0.0494	0.00479253	0.5213	0.413418	FALSE	FALSE	FALSE	CffBSP	32136429	0.841302	0.0239353	TRUE	reported	textfile	12	32289363	0.0115	1.74e-05	14726	GCST90274759.txt	TRUE	reported	textfile	TRUE	0.0012515	18.4501	7.50309
	rs9819061	A	T	A	T	-0.0721	-0.0113266	0.1154	0.120421	FALSE	TRUE	FALSE	CffBSP	163749490	0.754566	0.0362305	TRUE	reported	textfile	3	163467278	0.0187	0.000115	14287	GCST90274759.txt	TRUE	reported	textfile	TRUE	0.00103943	14.8637	7.50309
	rs9904996	A	G	A	G	-0.0721	-0.0259611	0.0808	0.909609	FALSE	FALSE	FALSE	CffBSP	58634346	0.526901	0.0410294	TRUE	reported	textfile	17	56711707	0.022	0.00105	14288	GCST90274759.txt	TRUE	reported	textfile	TRUE	0.000751151	10.739	7.50309
	rs9925905	A	T	A	T	-0.0389	-0.00596115	0.4833	0.457303	FALSE	TRUE	TRUE	CffBSP	57046954	0.802285	0.0238074	TRUE	reported	textfile	16	57080866	0.0123	0.00156	14288	GCST90274759.txt	TRUE	reported	textfile	FALSE	0.000699542	10.0006	7.50309
	rs9930488	A	T	A	T	0.2387	0.156573	0.9834	0.988591	FALSE	TRUE	FALSE	CffBSP	9668111	0.16046	0.111557	TRUE	reported	textfile	16	9761968	0.0615	0.000104	7903	GCST90274759.txt	TRUE	reported	textfile	TRUE	0.00190255	15.0607	7.50309
GCST90274760	rs10799609	T	C	T	C	-0.1321	-0.0585941	0.0561	0.96999	FALSE	FALSE	FALSE	CffBSP	20091830	0.386026	0.0675947	TRUE	reported	textfile	1	20418323	0.0293	6.53e-06	11778	GCST90274760.txt	TRUE	reported	textfile	TRUE	0.00172286	20.3234	21.551
	rs114907684	T	C	T	C	-0.3648	0.105745	0.9881	0.00655048	FALSE	FALSE	FALSE	CffBSP	81549377	0.464598	0.144599	TRUE	reported	textfile	16	81582982	0.0818	8.21e-06	8283	GCST90274760.txt	TRUE	reported	textfile	TRUE	0.00239538	19.8837	21.551
	rs118087756	A	G	A	G	-0.4237	-0.00413465	0.0108	0.997739	FALSE	FALSE	FALSE	CffBSP	93774946	0.986337	0.241437	TRUE	reported	textfile	6	94484664	0.094	6.56e-06	8024	GCST90274760.txt	TRUE	reported	textfile	TRUE	0.00252564	20.312	21.551
	rs118115625	T	C	T	C	0.1703	-0.0841526	0.0344	0.985266	FALSE	FALSE	FALSE	CffBSP	81330411	0.379099	0.0956761	TRUE	reported	textfile	12	81724190	0.0362	2.55e-06	11778	GCST90274760.txt	TRUE	reported	textfile	TRUE	0.00187554	22.1278	21.551
	rs12699544	A	G	A	G	0.0803	-0.0315616	0.1536	0.846868	FALSE	FALSE	FALSE	CffBSP	13741372	0.336989	0.0328721	TRUE	reported	textfile	7	13780997	0.0181	9.14e-06	11777	GCST90274760.txt	TRUE	reported	textfile	TRUE	0.00166845	19.6789	21.551
	rs1329733	A	G	A	G	-0.0674	0.000986343	0.5323	0.494142	FALSE	FALSE	FALSE	CffBSP	89593312	0.966595	0.0235522	TRUE	reported	textfile	9	92208227	0.0136	7.2e-07	11330	GCST90274760.txt	TRUE	reported	textfile	TRUE	0.00216308	24.5564	21.551
	rs13303278	A	C	A	C	-0.0664	0.0328976	0.5539	0.478065	FALSE	FALSE	FALSE	CffBSP	986336	0.16486	0.0236859	TRUE	reported	textfile	1	921716	0.0144	4.01e-06	10265	GCST90274760.txt	TRUE	reported	textfile	TRUE	0.00206706	21.2582	21.551
	rs1370215	T	C	T	C	-0.07	-0.024844	0.7417	0.291793	FALSE	FALSE	FALSE	CffBSP	57021708	0.336304	0.0258389	TRUE	reported	textfile	18	54688939	0.0153	4.76e-06	11330	GCST90274760.txt	TRUE	reported	textfile	TRUE	0.00184409	20.9284	21.551
	rs138311590	A	G	A	G	-0.0811	0.0620798	0.84	0.163109	FALSE	FALSE	FALSE	CffBSP	4422317	0.0489114	0.0315228	TRUE	reported	textfile	4	4424044	0.0176	4.07e-06	11758	GCST90274760.txt	TRUE	reported	textfile	TRUE	0.0018026	21.2296	21.551
	rs141429639	A	G	A	G	-0.293	0.0174959	0.0147	0.977619	FALSE	FALSE	FALSE	CffBSP	52991126	0.830398	0.0816837	TRUE	reported	textfile	8	53903686	0.0644	5.37e-06	11330	GCST90274760.txt	TRUE	reported	textfile	TRUE	0.00182365	20.696	21.551
	rs141625055	A	G	A	G	0.1852	0.0338319	0.0327	0.962572	FALSE	FALSE	FALSE	CffBSP	141426353	0.58645	0.0621926	TRUE	reported	textfile	2	142183922	0.0418	9.4e-06	11765	GCST90274760.txt	TRUE	reported	textfile	TRUE	0.00166576	19.6271	21.551
	rs142585779	T	C	T	C	0.2119	-0.00868776	0.038	0.96047	FALSE	FALSE	FALSE	CffBSP	137345136	0.892281	0.0641549	TRUE	reported	textfile	9	140239588	0.0435	1.11e-06	10266	GCST90274760.txt	TRUE	reported	textfile	TRUE	0.00230611	23.7246	21.551
	rs142970662	A	G	A	G	0.311	-0.0305741	0.0191	0.990228	FALSE	FALSE	FALSE	CffBSP	107321216	0.800302	0.120867	TRUE	reported	textfile	7	106961661	0.0639	1.13e-06	9834	GCST90274760.txt	TRUE	reported	textfile	TRUE	0.00240295	23.6827	21.551
	rs17340161	A	G	A	G	-0.0873	-0.028509	0.8494	0.126918	FALSE	FALSE	FALSE	CffBSP	104130863	0.422763	0.0355635	TRUE	reported	textfile	5	103466564	0.0189	3.86e-06	11330	GCST90274760.txt	TRUE	reported	textfile	TRUE	0.00187957	21.3318	21.551
	rs17491469	A	G	A	G	-0.0897	-0.0431217	0.1327	0.867897	FALSE	FALSE	FALSE	CffBSP	189446785	0.217054	0.0349333	TRUE	reported	textfile	3	189164574	0.0197	5.28e-06	11777	GCST90274760.txt	TRUE	reported	textfile	TRUE	0.00175733	20.729	21.551
	rs3001873	T	C	T	C	-0.0852	-0.00297295	0.1749	0.784869	FALSE	FALSE	FALSE	CffBSP	50689260	0.918697	0.0291249	TRUE	reported	textfile	10	52449020	0.0185	4.12e-06	11330	GCST90274760.txt	TRUE	reported	textfile	TRUE	0.0018685	21.206	21.551
	rs3003450	T	G	T	G	0.0632	-0.034427	0.6627	0.342691	FALSE	FALSE	FALSE	CffBSP	17301888	0.164191	0.0247478	TRUE	reported	textfile	1	17628383	0.0137	3.97e-06	11762	GCST90274760.txt	TRUE	reported	textfile	TRUE	0.00180604	21.2774	21.551
	rs4561132	A	G	A	G	-0.0716	0.039776	0.2386	0.720022	FALSE	FALSE	FALSE	CffBSP	95918265	0.131007	0.0263392	TRUE	reported	textfile	10	97678022	0.0159	6.7e-06	11329	GCST90274760.txt	TRUE	reported	textfile	TRUE	0.00178675	20.2747	21.551
	rs4740350	A	G	A	G	0.0877	-0.0670437	0.1326	0.856227	FALSE	FALSE	FALSE	CffBSP	130578719	0.0458079	0.0335696	TRUE	reported	textfile	9	133454106	0.0194	6.17e-06	11778	GCST90274760.txt	TRUE	reported	textfile	TRUE	0.00173209	20.4325	21.551
	rs55885546	A	G	A	G	-0.2047	-0.0947009	0.0245	0.957375	FALSE	FALSE	FALSE	CffBSP	19635666	0.109411	0.0591568	TRUE	reported	textfile	8	19493177	0.044	3.28e-06	11778	GCST90274760.txt	TRUE	reported	textfile	TRUE	0.00183426	21.64	21.551
	rs62277657	A	G	A	G	0.0833	0.0334962	0.1972	0.8331	FALSE	FALSE	FALSE	CffBSP	112001336	0.287386	0.0314852	TRUE	reported	textfile	3	111720183	0.0166	5.22e-07	11777	GCST90274760.txt	TRUE	reported	textfile	TRUE	0.00213359	25.1768	21.551
	rs6509909	C	G	C	G	-0.0881	0.055836	0.8122	0.788645	FALSE	TRUE	FALSE	CffBSP	54910674	0.0535156	0.0289195	TRUE	reported	textfile	19	55422034	0.0176	5.57e-07	11330	GCST90274760.txt	TRUE	reported	textfile	TRUE	0.00220667	25.0524	21.551
	rs74383279	C	G	C	G	-0.1899	0.0528899	0.9634	0.97443	FALSE	TRUE	FALSE	CffBSP	111074468	0.46993	0.0731946	TRUE	reported	textfile	8	112086697	0.0421	6.46e-06	11761	GCST90274760.txt	TRUE	reported	textfile	TRUE	0.00172699	20.3429	21.551
	rs76672219	A	C	A	C	-0.3226	-0.0372002	0.9882	0.0114186	FALSE	FALSE	FALSE	CffBSP	224869887	0.737908	0.11117	TRUE	reported	textfile	1	225057589	0.0682	2.24e-06	11291	GCST90274760.txt	TRUE	reported	textfile	TRUE	0.00197773	22.3709	21.551
	rs77502336	C	G	C	G	0.0679	0.0346685	0.318	0.313	FALSE	TRUE	FALSE	CffBSP	123523928	0.173476	0.0254705	TRUE	reported	textfile	11	123394636	0.0141	1.47e-06	11775	GCST90274760.txt	TRUE	reported	textfile	TRUE	0.00196556	23.1861	21.551
	rs79259958	T	C	T	C	-0.3099	-0.0390589	0.0147	0.97648	FALSE	FALSE	FALSE	CffBSP	40378862	0.626353	0.0802251	TRUE	reported	textfile	4	40380879	0.0697	8.74e-06	9945	GCST90274760.txt	TRUE	reported	textfile	TRUE	0.00198386	19.7647	21.551
	rs79664530	C	G	C	G	-0.3211	0.563079	0.0125	0.00262207	FALSE	TRUE	FALSE	CffBSP	197220261	0.00269315	0.187646	TRUE	reported	textfile	1	197189391	0.0718	7.74e-06	10843	GCST90274760.txt	TRUE	reported	textfile	TRUE	0.00184112	19.9964	21.551
	rs9496445	T	C	T	C	0.0853	-0.0759662	0.1545	0.86562	FALSE	FALSE	FALSE	CffBSP	142726761	0.0291521	0.0348242	TRUE	reported	textfile	6	143047898	0.0181	2.44e-06	11768	GCST90274760.txt	TRUE	reported	textfile	TRUE	0.00188373	22.2058	21.551
	rs9682166	T	C	T	C	-0.1481	-0.0599564	0.0532	0.943785	FALSE	FALSE	FALSE	CffBSP	93801959	0.245187	0.0515922	TRUE	reported	textfile	3	93520803	0.0334	9.24e-06	9453	GCST90274760.txt	TRUE	reported	textfile	TRUE	0.00207561	19.6574	21.551
	rs9684768	C	G	C	G	0.0692	-0.0204705	0.626	0.644578	FALSE	TRUE	FALSE	CffBSP	156009623	0.40603	0.0246365	TRUE	reported	textfile	4	156930775	0.014	7.7e-07	11330	GCST90274760.txt	TRUE	reported	textfile	TRUE	0.00215174	24.4275	21.551
	rs9941952	T	C	T	C	0.0765	0.0150378	0.7151	0.251712	FALSE	FALSE	FALSE	CffBSP	25250526	0.579502	0.0271385	TRUE	reported	textfile	22	25646493	0.0167	4.63e-06	11774	GCST90274760.txt	TRUE	reported	textfile	TRUE	0.00177907	20.9805	21.551
GCST90274761	rs10860902	C	G	C	G	0.0659	-0.0366173	0.7403	0.735837	FALSE	TRUE	FALSE	CffBSP	102681269	0.171744	0.0267941	TRUE	reported	textfile	12	103075047	0.0149	9.74e-06	11778	GCST90274761.txt	TRUE	reported	textfile	TRUE	0.00165808	19.558	22.1105
	rs11202576	A	G	A	G	-0.0767	-0.0519654	0.7946	0.189225	FALSE	FALSE	FALSE	CffBSP	87824527	0.0811521	0.0297961	TRUE	reported	textfile	10	89584284	0.0172	8.22e-06	11345	GCST90274761.txt	TRUE	reported	textfile	TRUE	0.00174972	19.8819	22.1105
	rs113946880	T	C	T	C	0.1331	-0.0594716	0.0539	0.964835	FALSE	FALSE	FALSE	CffBSP	134836818	0.351431	0.0638232	TRUE	reported	textfile	11	134706712	0.0293	5.55e-06	11792	GCST90274761.txt	TRUE	reported	textfile	TRUE	0.00174692	20.6323	22.1105
	rs115455827	A	G	A	G	0.1447	-0.0276995	0.9489	0.0736283	FALSE	FALSE	FALSE	CffBSP	79492030	0.538456	0.0450289	TRUE	reported	textfile	5	78787853	0.0305	2.09e-06	11792	GCST90274761.txt	TRUE	reported	textfile	TRUE	0.00190512	22.5042	22.1105
	rs117097664	A	C	A	C	0.2444	-0.00444088	0.0197	0.981763	FALSE	FALSE	FALSE	CffBSP	151013394	0.961019	0.0908617	TRUE	reported	textfile	6	151334530	0.0522	2.84e-06	11345	GCST90274761.txt	TRUE	reported	textfile	TRUE	0.0019285	21.9172	22.1105
	rs148317708	A	G	A	G	-0.212	-0.0110927	0.0295	0.989776	FALSE	FALSE	FALSE	CffBSP	52987448	0.923615	0.115693	TRUE	reported	textfile	18	50513818	0.042	4.47e-07	10919	GCST90274761.txt	TRUE	reported	textfile	TRUE	0.00232797	25.4738	22.1105
	rs2470622	A	G	A	G	-0.1229	0.0149324	0.9127	0.078288	FALSE	FALSE	FALSE	CffBSP	101477476	0.736253	0.0443338	TRUE	reported	textfile	8	102489704	0.0242	3.8e-07	11345	GCST90274761.txt	TRUE	reported	textfile	TRUE	0.00226821	25.7867	22.1105
	rs2691530	T	C	T	C	-0.067	0.0286436	0.5969	0.440171	FALSE	FALSE	FALSE	CffBSP	78330926	0.23001	0.023863	TRUE	reported	textfile	7	77960243	0.0133	4.71e-07	11793	GCST90274761.txt	TRUE	reported	textfile	TRUE	0.00214728	25.373	22.1105
	rs2712427	A	G	A	G	0.0626	-0.00391465	0.4935	0.533612	FALSE	FALSE	FALSE	CffBSP	128712779	0.86953	0.0238327	TRUE	reported	textfile	3	128431622	0.0134	2.99e-06	11345	GCST90274761.txt	TRUE	reported	textfile	TRUE	0.00191999	21.8204	22.1105
	rs428324	T	C	T	C	0.0692	-0.00484022	0.6047	0.444847	FALSE	FALSE	FALSE	CffBSP	79493338	0.838905	0.0238089	TRUE	reported	textfile	18	77253338	0.0148	2.93e-06	10281	GCST90274761.txt	TRUE	reported	textfile	TRUE	0.00212193	21.8577	22.1105
	rs7171268	T	C	T	C	0.1554	-0.0264128	0.9514	0.038631	FALSE	FALSE	FALSE	CffBSP	80929430	0.672202	0.0624227	TRUE	reported	textfile	15	81221771	0.0329	2.32e-06	11345	GCST90274761.txt	TRUE	reported	textfile	TRUE	0.00196269	22.3066	22.1105
	rs72984228	A	G	A	G	-0.1557	-0.00523492	0.9611	0.0425724	FALSE	FALSE	FALSE	CffBSP	101460401	0.929037	0.0587824	TRUE	reported	textfile	11	101331132	0.035	8.64e-06	11792	GCST90274761.txt	TRUE	reported	textfile	TRUE	0.00167543	19.7864	22.1105
	rs9962377	T	C	T	C	-0.0843	0.0327776	0.1481	0.910296	FALSE	FALSE	FALSE	CffBSP	72438296	0.430806	0.0416059	TRUE	reported	textfile	18	70105531	0.0186	5.84e-06	11793	GCST90274761.txt	TRUE	reported	textfile	TRUE	0.0017388	20.5379	22.1105
GCST90274762	rs10961630	C	G	C	G	0.053	0.0558253	0.55	0.560843	FALSE	TRUE	TRUE	CffBSP	14636948	0.0184485	0.02369	TRUE	reported	textfile	9	14636946	0.0118	7.07e-06	14295	GCST90274762.txt	TRUE	reported	textfile	FALSE	0.00140926	20.171	22.7357
	rs11025264	T	C	T	C	0.1739	0.182625	0.9748	0.014293	FALSE	FALSE	FALSE	CffBSP	19816212	0.0627061	0.0981184	TRUE	reported	textfile	11	19837758	0.0384	5.94e-06	14743	GCST90274762.txt	TRUE	reported	textfile	TRUE	0.00138914	20.5059	22.7357
	rs11404457	CT	C	CT	C	-0.0672	0.046772	0.209	0.767793	FALSE	FALSE	FALSE	CffBSP	226151595	0.0947829	0.0279957	TRUE	reported	textfile	2	227016311	0.015	7.46e-06	11336	GCST90274762.txt	TRUE	reported	textfile	TRUE	0.00176737	20.0669	22.7357
	rs117164089	T	C	T	C	-0.271	0.130843	0.014	0.995948	FALSE	FALSE	FALSE	CffBSP	43276244	0.491611	0.190249	TRUE	reported	textfile	19	43780396	0.0565	1.61e-06	13421	GCST90274762.txt	TRUE	reported	textfile	TRUE	0.00171125	23.0026	22.7357
	rs12188775	T	G	T	G	0.1213	-0.0386705	0.9435	0.0517288	FALSE	FALSE	FALSE	CffBSP	133636071	0.475145	0.0541502	TRUE	reported	textfile	5	132971762	0.0247	9.06e-07	14737	GCST90274762.txt	TRUE	reported	textfile	TRUE	0.00163384	24.114	22.7357
	rs12259196	A	G	A	G	-0.075	0.0218797	0.1928	0.850111	FALSE	FALSE	FALSE	CffBSP	88079673	0.50855	0.0330961	TRUE	reported	textfile	10	89839430	0.0148	4.03e-07	13244	GCST90274762.txt	TRUE	reported	textfile	TRUE	0.00193526	25.6764	22.7357
	rs12533747	A	G	A	G	0.1389	-0.0844355	0.0802	0.935256	FALSE	FALSE	FALSE	CffBSP	30905284	0.0877082	0.0494464	TRUE	reported	textfile	7	30944899	0.0276	4.84e-07	14295	GCST90274762.txt	TRUE	reported	textfile	TRUE	0.00176862	25.3236	22.7357
	rs12539643	C	G	C	G	0.1867	-0.0754893	0.966	0.950774	FALSE	TRUE	FALSE	CffBSP	151321935	0.170971	0.0551383	TRUE	reported	textfile	7	151019021	0.0408	4.74e-06	11344	GCST90274762.txt	TRUE	reported	textfile	TRUE	0.00184247	20.9359	22.7357
	rs13058191	C	G	C	G	-0.2164	-0.0289733	0.0256	0.0137143	FALSE	TRUE	FALSE	CffBSP	49380054	0.778546	0.103029	TRUE	reported	textfile	22	49775973	0.0467	3.59e-06	14295	GCST90274762.txt	TRUE	reported	textfile	TRUE	0.00149984	21.4694	22.7357
	rs140072192	A	G	A	G	0.2773	0.000229501	0.0196	0.996082	FALSE	FALSE	FALSE	CffBSP	3277943	0.999	0.183049	TRUE	reported	textfile	16	3327943	0.0602	4.1e-06	11925	GCST90274762.txt	TRUE	reported	textfile	TRUE	0.00177614	21.2146	22.7357
	rs140882208	T	C	T	C	-0.1722	-0.0220078	0.0258	0.972414	FALSE	FALSE	FALSE	CffBSP	49287924	0.75774	0.0713495	TRUE	reported	textfile	17	47365286	0.0388	9.07e-06	14731	GCST90274762.txt	TRUE	reported	textfile	TRUE	0.00133534	19.6945	22.7357
	rs148834134	T	C	T	C	0.2541	0.134465	0.0235	0.995433	FALSE	FALSE	FALSE	CffBSP	42522516	0.438702	0.17364	TRUE	reported	textfile	21	43942626	0.0556	4.87e-06	13421	GCST90274762.txt	TRUE	reported	textfile	TRUE	0.00155382	20.8831	22.7357
	rs149439201	G	GT	G	GT	0.1719	0.0213926	0.9639	0.0227545	FALSE	FALSE	FALSE	CffBSP	13858535	0.786254	0.0788879	TRUE	reported	textfile	12	14011469	0.0383	7.18e-06	10894	GCST90274762.txt	TRUE	reported	textfile	TRUE	0.00184571	20.1407	22.7357
	rs17647697	A	C	A	C	-0.1617	-0.0365363	0.9727	0.0255868	FALSE	FALSE	FALSE	CffBSP	130617216	0.620052	0.073695	TRUE	reported	textfile	7	130302087	0.0352	4.35e-06	14741	GCST90274762.txt	TRUE	reported	textfile	TRUE	0.00142951	21.0997	22.7357
	rs17689534	A	G	A	G	0.2208	-0.0577656	0.0229	0.996345	FALSE	FALSE	FALSE	CffBSP	165886488	0.749204	0.180692	TRUE	reported	textfile	4	166807640	0.0462	1.76e-06	13421	GCST90274762.txt	TRUE	reported	textfile	TRUE	0.00169899	22.8375	22.7357
	rs183185212	A	C	A	C	-0.2977	0.00608014	0.9883	0.0168922	FALSE	FALSE	FALSE	CffBSP	9413371	0.948363	0.0938842	TRUE	reported	textfile	11	9434918	0.0657	5.86e-06	13808	GCST90274762.txt	TRUE	reported	textfile	TRUE	0.00148474	20.5288	22.7357
	rs1878359	A	G	A	G	0.0626	-0.0134152	0.719	0.31209	FALSE	FALSE	FALSE	CffBSP	121936573	0.600902	0.0256455	TRUE	reported	textfile	8	122948812	0.0126	6.76e-07	14740	GCST90274762.txt	TRUE	reported	textfile	TRUE	0.0016718	24.6802	22.7357
	rs2237172	A	G	A	G	0.0619	0.0100769	0.7375	0.275355	FALSE	FALSE	FALSE	CffBSP	16601356	0.705403	0.0266557	TRUE	reported	textfile	6	16601587	0.0136	5.33e-06	14295	GCST90274762.txt	TRUE	reported	textfile	TRUE	0.00144707	20.713	22.7357
	rs3128517	T	C	T	C	-0.0775	-0.00300826	0.4965	0.529252	FALSE	FALSE	FALSE	CffBSP	87747125	0.898764	0.0236456	TRUE	reported	textfile	9	90362040	0.0118	5.11e-11	14295	GCST90274762.txt	TRUE	reported	textfile	TRUE	0.00300848	43.1299	22.7357
	rs34043924	T	TA	T	TA	0.0683	-0.028573	0.7798	0.201581	FALSE	FALSE	FALSE	CffBSP	59077445	0.32542	0.0290558	TRUE	reported	textfile	1	59543117	0.015	5.28e-06	11331	GCST90274762.txt	TRUE	reported	textfile	TRUE	0.0018264	20.7292	22.7357
	rs34559191	T	C	T	C	0.0607	-0.00786686	0.3088	0.703108	FALSE	FALSE	FALSE	CffBSP	16324126	0.759668	0.0257157	TRUE	reported	textfile	19	16434937	0.0124	9.82e-07	13675	GCST90274762.txt	TRUE	reported	textfile	TRUE	0.00174923	23.9591	22.7357
	rs397081	T	C	T	C	0.1203	0.164194	0.9514	0.0348096	FALSE	FALSE	FALSE	CffBSP	32224840	0.00811428	0.0620238	TRUE	reported	textfile	6	32192617	0.0262	4.4e-06	14743	GCST90274762.txt	TRUE	reported	textfile	TRUE	0.00142798	21.08	22.7357
	rs4017	T	C	T	C	-0.1187	-0.00631483	0.9491	0.0259087	FALSE	FALSE	FALSE	CffBSP	163142947	0.932104	0.0741191	TRUE	reported	textfile	4	164064099	0.0258	4.21e-06	14742	GCST90274762.txt	TRUE	reported	textfile	TRUE	0.00143378	21.1643	22.7357
	rs4087847	T	G	T	G	-0.1546	-0.0241762	0.0301	0.93722	FALSE	FALSE	FALSE	CffBSP	2455419	0.621124	0.048914	TRUE	reported	textfile	18	2455418	0.0343	6.57e-06	14743	GCST90274762.txt	TRUE	reported	textfile	TRUE	0.00137609	20.3129	22.7357
	rs4899264	C	G	C	G	-0.055	-0.0123502	0.5283	0.514233	FALSE	TRUE	TRUE	CffBSP	68818620	0.600139	0.02356	TRUE	reported	textfile	14	69285337	0.0117	2.59e-06	14295	GCST90274762.txt	TRUE	reported	textfile	FALSE	0.00154347	22.0949	22.7357
	rs4980184	T	C	T	C	0.2352	0.244635	0.9836	0.00708529	FALSE	FALSE	FALSE	CffBSP	123299353	0.06633	0.13323	TRUE	reported	textfile	10	125058869	0.0521	6.35e-06	14295	GCST90274762.txt	TRUE	reported	textfile	TRUE	0.00142363	20.3769	22.7357
	rs62092633	T	C	T	C	-0.1249	0.0618123	0.1005	0.858747	FALSE	FALSE	FALSE	CffBSP	57774394	0.0701245	0.0341296	TRUE	reported	textfile	18	55441626	0.0259	1.42e-06	11344	GCST90274762.txt	TRUE	reported	textfile	TRUE	0.00204583	23.2514	22.7357
	rs62494116	T	C	T	C	0.0578	-0.0423011	0.6636	0.301955	FALSE	FALSE	FALSE	CffBSP	13474533	0.100479	0.0257536	TRUE	reported	textfile	8	13332042	0.0117	7.81e-07	14729	GCST90274762.txt	TRUE	reported	textfile	TRUE	0.00165421	24.402	22.7357
	rs6328	A	C	A	C	-0.0797	-0.0014653	0.3498	0.671404	FALSE	FALSE	FALSE	CffBSP	115287322	0.953169	0.0249504	TRUE	reported	textfile	1	115829943	0.0122	6.46e-11	13224	GCST90274762.txt	TRUE	reported	textfile	TRUE	0.00321688	42.6708	22.7357
	rs7149605	A	G	A	G	0.0862	-0.0918777	0.0949	0.916991	FALSE	FALSE	FALSE	CffBSP	94387704	0.0324616	0.0429601	TRUE	reported	textfile	14	94854041	0.0195	9.85e-06	14731	GCST90274762.txt	TRUE	reported	textfile	TRUE	0.00132476	19.5383	22.7357
	rs72673086	A	G	A	G	0.0584	0.0236408	0.3152	0.642316	FALSE	FALSE	FALSE	CffBSP	95902992	0.334358	0.0244888	TRUE	reported	textfile	4	96824143	0.0126	3.57e-06	12858	GCST90274762.txt	TRUE	reported	textfile	TRUE	0.00166796	21.4791	22.7357
	rs73782207	A	G	A	G	0.0925	0.0182	0.0825	0.877157	FALSE	FALSE	FALSE	CffBSP	150131335	0.615493	0.0362371	TRUE	reported	textfile	6	150452471	0.0205	6.42e-06	14734	GCST90274762.txt	TRUE	reported	textfile	TRUE	0.00137992	20.3571	22.7357
	rs74639669	A	T	A	T	-0.1748	-0.0630739	0.0281	0.0185749	FALSE	TRUE	FALSE	CffBSP	5679361	0.468993	0.0871043	TRUE	reported	textfile	18	5679360	0.0386	5.94e-06	14733	GCST90274762.txt	TRUE	reported	textfile	TRUE	0.00138999	20.5045	22.7357
	rs77493302	T	C	T	C	0.0853	-0.0514954	0.8904	0.112992	FALSE	FALSE	FALSE	CffBSP	838092	0.17045	0.0375671	TRUE	reported	textfile	6	838092	0.0185	4.01e-06	14743	GCST90274762.txt	TRUE	reported	textfile	TRUE	0.00143994	21.2567	22.7357
	rs78167655	T	C	T	C	-0.1646	0.0317323	0.0262	0.984054	FALSE	FALSE	FALSE	CffBSP	118344933	0.733954	0.0933659	TRUE	reported	textfile	4	119266088	0.0365	6.5e-06	14743	GCST90274762.txt	TRUE	reported	textfile	TRUE	0.00137749	20.3336	22.7357
	rs9479501	T	G	T	G	0.0629	-0.00159743	0.2135	0.783329	FALSE	FALSE	FALSE	CffBSP	153079283	0.955445	0.0285919	TRUE	reported	textfile	6	153400418	0.0137	4.41e-06	14729	GCST90274762.txt	TRUE	reported	textfile	TRUE	0.00142911	21.0766	22.7357
	rs9599159	T	C	T	C	-0.175	-0.125507	0.9756	0.0243515	FALSE	FALSE	FALSE	CffBSP	66853914	0.109066	0.0783241	TRUE	reported	textfile	13	67428046	0.0387	6.13e-06	14730	GCST90274762.txt	TRUE	reported	textfile	TRUE	0.00138627	20.4454	22.7357
GCST90274763	rs10024203	A	C	A	C	0.0922	0.0212683	0.094	0.866203	FALSE	FALSE	FALSE	CffBSP	5784867	0.540869	0.0347806	TRUE	reported	textfile	4	5786594	0.0203	5.58e-06	14735	GCST90274763.txt	TRUE	reported	textfile	TRUE	0.00139802	20.6258	26.6607
	rs1032417	C	G	C	G	-0.0858	0.000778686	0.1545	0.123899	FALSE	TRUE	FALSE	CffBSP	62251705	0.982597	0.0356982	TRUE	reported	textfile	12	62645486	0.0165	1.99e-07	14296	GCST90274763.txt	TRUE	reported	textfile	TRUE	0.00188787	27.0362	26.6607
	rs1034059	A	G	A	G	0.0681	-0.0148641	0.6981	0.298339	FALSE	FALSE	FALSE	CffBSP	157772666	0.5732	0.0263854	TRUE	reported	textfile	6	158193698	0.0145	2.65e-06	14296	GCST90274763.txt	TRUE	reported	textfile	TRUE	0.00154054	22.0545	26.6607
	rs111764025	C	G	C	G	0.1095	-0.0158837	0.9304	0.947468	FALSE	TRUE	FALSE	CffBSP	5700253	0.766304	0.053442	TRUE	reported	textfile	8	5557775	0.0238	4.21e-06	14731	GCST90274763.txt	TRUE	reported	textfile	TRUE	0.00143489	21.1649	26.6607
	rs11216018	A	G	A	G	-0.0539	0.0057107	0.3708	0.630916	FALSE	FALSE	FALSE	CffBSP	98584989	0.814011	0.0242746	TRUE	reported	textfile	11	98455719	0.0121	8.41e-06	14296	GCST90274763.txt	TRUE	reported	textfile	TRUE	0.00138608	19.8402	26.6607
	rs11695193	A	T	A	T	-0.0806	-0.0621655	0.1582	0.10875	FALSE	TRUE	FALSE	CffBSP	230225300	0.0952752	0.0372649	TRUE	reported	textfile	2	231090015	0.0162	6.51e-07	14743	GCST90274763.txt	TRUE	reported	textfile	TRUE	0.0016762	24.7503	26.6607
	rs11709039	T	C	T	C	0.0781	0.0100861	0.856	0.119645	FALSE	FALSE	FALSE	CffBSP	152614884	0.781459	0.0363569	TRUE	reported	textfile	3	152332673	0.0168	3.34e-06	14743	GCST90274763.txt	TRUE	reported	textfile	TRUE	0.00146373	21.6085	26.6607
	rs12073499	A	C	A	C	-0.0812	-0.0176191	0.8466	0.187798	FALSE	FALSE	FALSE	CffBSP	157300725	0.557594	0.0300452	TRUE	reported	textfile	1	157270515	0.0167	1.16e-06	14295	GCST90274763.txt	TRUE	reported	textfile	TRUE	0.00165111	23.6384	26.6607
	rs13188908	T	C	T	C	0.0668	-0.0425863	0.1902	0.773145	FALSE	FALSE	FALSE	CffBSP	180496576	0.12906	0.0280576	TRUE	reported	textfile	5	179923576	0.015	8.45e-06	14736	GCST90274763.txt	TRUE	reported	textfile	TRUE	0.00134402	19.8295	26.6607
	rs137887001	C	G	C	G	0.2318	0.0533763	0.9827	0.985596	FALSE	TRUE	FALSE	CffBSP	45938222	0.580874	0.0966772	TRUE	reported	textfile	20	44566861	0.0486	1.85e-06	14296	GCST90274763.txt	TRUE	reported	textfile	TRUE	0.00158873	22.7454	26.6607
	rs140844269	C	G	C	G	-0.3615	0.178099	0.0099	0.0113136	FALSE	TRUE	FALSE	CffBSP	64049923	0.10689	0.110461	TRUE	reported	textfile	11	63817395	0.0776	3.19e-06	12330	GCST90274763.txt	TRUE	reported	textfile	TRUE	0.00175698	21.6982	26.6607
	rs1467702	A	G	A	G	-0.0962	-0.0713221	0.0863	0.923805	FALSE	FALSE	FALSE	CffBSP	128163637	0.116755	0.0454703	TRUE	reported	textfile	10	129961901	0.0215	7.66e-06	14743	GCST90274763.txt	TRUE	reported	textfile	TRUE	0.00135612	20.0177	26.6607
	rs148608719	A	G	A	G	0.3474	0.00886474	0.0145	0.965542	FALSE	FALSE	FALSE	CffBSP	180912648	0.894992	0.0671621	TRUE	reported	textfile	5	180339648	0.0683	3.65e-07	12745	GCST90274763.txt	TRUE	reported	textfile	TRUE	0.00202581	25.8672	26.6607
	rs187405204	T	C	T	C	0.4195	0.0239035	0.9851	0.0122357	FALSE	FALSE	FALSE	CffBSP	62263786	0.826429	0.109007	TRUE	reported	textfile	7	61833768	0.0912	4.23e-06	6257	GCST90274763.txt	TRUE	reported	textfile	TRUE	0.00337009	21.1512	26.6607
	rs2411067	A	G	A	G	-0.0706	-0.00484723	0.685	0.310492	FALSE	FALSE	FALSE	CffBSP	77037794	0.84943	0.0255325	TRUE	reported	textfile	17	75033876	0.0157	6.9e-06	11345	GCST90274763.txt	TRUE	reported	textfile	TRUE	0.00177923	20.2178	26.6607
	rs34154371	T	C	T	C	-0.2016	-0.0755435	0.9714	0.0143746	FALSE	FALSE	FALSE	CffBSP	2406576	0.449782	0.0999544	TRUE	reported	textfile	1	2338015	0.0422	1.78e-06	13232	GCST90274763.txt	TRUE	reported	textfile	TRUE	0.0017218	22.8187	26.6607
	rs56097553	A	G	A	G	0.1384	-0.0544638	0.0405	0.980738	FALSE	FALSE	FALSE	CffBSP	82073260	0.519017	0.0844582	TRUE	reported	textfile	12	82467039	0.0312	9.17e-06	14744	GCST90274763.txt	TRUE	reported	textfile	TRUE	0.00133281	19.6745	26.6607
	rs56328050	C	G	C	G	-0.1987	0.0363655	0.8696	0.894436	FALSE	TRUE	FALSE	CffBSP	201300082	0.342716	0.0383274	TRUE	reported	textfile	2	202164805	0.0173	1.56e-30	14743	GCST90274763.txt	TRUE	reported	textfile	TRUE	0.00886848	131.9	26.6607
	rs7146962	T	C	T	C	-0.0613	-0.028715	0.7483	0.19724	FALSE	FALSE	FALSE	CffBSP	53678599	0.331293	0.029557	TRUE	reported	textfile	14	54145317	0.0135	5.61e-06	14295	GCST90274763.txt	TRUE	reported	textfile	TRUE	0.00144027	20.6154	26.6607
	rs7287303	T	C	T	C	0.0985	0.00334075	0.1249	0.843975	FALSE	FALSE	FALSE	CffBSP	48318300	0.918672	0.032718	TRUE	reported	textfile	22	48714112	0.0222	9.12e-06	11791	GCST90274763.txt	TRUE	reported	textfile	TRUE	0.00166683	19.6831	26.6607
	rs73306603	T	C	T	C	0.2044	0.0367097	0.978	0.00677512	FALSE	FALSE	FALSE	CffBSP	82267770	0.795271	0.141479	TRUE	reported	textfile	10	84027526	0.0412	7.01e-07	14741	GCST90274763.txt	TRUE	reported	textfile	TRUE	0.00166692	24.6098	26.6607
	rs7418913	A	G	A	G	-0.0614	-0.0188682	0.2714	0.779532	FALSE	FALSE	FALSE	CffBSP	203674140	0.506697	0.0284164	TRUE	reported	textfile	1	203643268	0.0138	8.62e-06	14296	GCST90274763.txt	TRUE	reported	textfile	TRUE	0.00138281	19.7933	26.6607
	rs78449258	A	G	A	G	-0.2001	-0.060576	0.9804	0.00789425	FALSE	FALSE	FALSE	CffBSP	22742537	0.639186	0.129205	TRUE	reported	textfile	9	22742536	0.0428	2.94e-06	14744	GCST90274763.txt	TRUE	reported	textfile	TRUE	0.00148029	21.8548	26.6607
GCST90274764	rs10911109	A	G	A	G	-0.0767	-0.0275357	0.1696	0.799829	FALSE	FALSE	FALSE	CffBSP	172148092	0.350528	0.0294952	TRUE	reported	textfile	1	172117232	0.0172	8.22e-06	11774	GCST90274764.txt	TRUE	reported	textfile	TRUE	0.00168608	19.882	34.73
	rs114744647	T	C	T	C	0.2107	-0.00370181	0.9774	0.0167992	FALSE	FALSE	FALSE	CffBSP	23995558	0.96818	0.0927971	TRUE	reported	textfile	16	24006879	0.0451	2.99e-06	14730	GCST90274764.txt	TRUE	reported	textfile	TRUE	0.00147955	21.8231	34.73
	rs12075	A	G	A	G	0.0749	-0.0540979	0.5547	0.467927	FALSE	FALSE	FALSE	CffBSP	159205564	0.0222188	0.0236586	TRUE	reported	textfile	1	159175354	0.0114	5.03e-11	14731	GCST90274764.txt	TRUE	reported	textfile	TRUE	0.0029218	43.1613	34.73
	rs12453306	C	G	C	G	-0.1089	0.0512818	0.9022	0.90289	FALSE	TRUE	FALSE	CffBSP	79257242	0.201526	0.0401513	TRUE	reported	textfile	17	77253324	0.0244	8.08e-06	11335	GCST90274764.txt	TRUE	reported	textfile	TRUE	0.00175425	19.9159	34.73
	rs139476527	T	G	T	G	0.2826	0.176844	0.0125	0.998365	FALSE	FALSE	FALSE	CffBSP	50417093	0.565624	0.307818	TRUE	reported	textfile	20	49033630	0.0606	3.11e-06	12933	GCST90274764.txt	TRUE	reported	textfile	TRUE	0.00167869	21.7436	34.73
	rs139597204	A	C	A	C	-0.3374	0.340879	0.0128	0.996025	FALSE	FALSE	FALSE	CffBSP	103585903	0.0709267	0.188754	TRUE	reported	textfile	4	104507060	0.0714	2.3e-06	12303	GCST90274764.txt	TRUE	reported	textfile	TRUE	0.00181174	22.3266	34.73
	rs140965534	T	C	T	C	-0.2283	0.043088	0.0172	0.985539	FALSE	FALSE	FALSE	CffBSP	48387727	0.653501	0.0959845	TRUE	reported	textfile	8	49300287	0.0514	8.93e-06	14238	GCST90274764.txt	TRUE	reported	textfile	TRUE	0.00138368	19.7253	34.73
	rs148554043	T	C	T	C	0.4043	0.00165292	0.0083	0.971259	FALSE	FALSE	FALSE	CffBSP	176246761	0.9815	0.0712835	TRUE	reported	textfile	3	175964549	0.0898	6.72e-06	11726	GCST90274764.txt	TRUE	reported	textfile	TRUE	0.00172566	20.2666	34.73
	rs151240414	A	G	A	G	0.2299	-0.000414948	0.0222	0.990966	FALSE	FALSE	FALSE	CffBSP	131336368	0.997332	0.124099	TRUE	reported	textfile	5	130672061	0.0508	6.02e-06	11335	GCST90274764.txt	TRUE	reported	textfile	TRUE	0.00180362	20.4774	34.73
	rs1564995	A	G	A	G	-0.0609	-0.0192244	0.6155	0.442262	FALSE	FALSE	FALSE	CffBSP	24751561	0.422258	0.0239554	TRUE	reported	textfile	11	24773107	0.0131	3.34e-06	14286	GCST90274764.txt	TRUE	reported	textfile	TRUE	0.00151051	21.6088	34.73
	rs170520	A	G	A	G	0.0554	0.0455382	0.3264	0.70151	FALSE	FALSE	FALSE	CffBSP	40757886	0.0763062	0.0256911	TRUE	reported	textfile	18	38337850	0.0125	9.34e-06	14285	GCST90274764.txt	TRUE	reported	textfile	TRUE	0.00137316	19.6399	34.73
	rs2112920	C	G	C	G	0.0817	-0.00474696	0.8362	0.835157	FALSE	TRUE	FALSE	CffBSP	37464346	0.881105	0.0317376	TRUE	reported	textfile	19	37955248	0.016	3.29e-07	14286	GCST90274764.txt	TRUE	reported	textfile	TRUE	0.0018218	26.0701	34.73
	rs2201150	T	C	T	C	0.0785	-0.00109932	0.3561	0.616797	FALSE	FALSE	FALSE	CffBSP	46217411	0.964017	0.024368	TRUE	reported	textfile	3	46258902	0.0123	1.75e-10	14286	GCST90274764.txt	TRUE	reported	textfile	TRUE	0.00284303	40.7257	34.73
	rs2228467	T	C	T	C	-0.3316	0.0399999	0.9289	0.0762607	FALSE	FALSE	FALSE	CffBSP	42864624	0.367573	0.0443936	TRUE	reported	textfile	3	42906116	0.0225	3.69e-49	14733	GCST90274764.txt	TRUE	reported	textfile	TRUE	0.0145284	217.173	34.73
	rs34536806	T	G	T	G	0.1017	-0.0470305	0.9023	0.0710146	FALSE	FALSE	FALSE	CffBSP	95541323	0.30763	0.046099	TRUE	reported	textfile	11	95274487	0.0208	1.01e-06	14286	GCST90274764.txt	TRUE	reported	textfile	TRUE	0.00167062	23.9031	34.73
	rs35543857	A	G	A	G	-0.1138	0.000389465	0.9282	0.0938623	FALSE	FALSE	FALSE	CffBSP	105364216	0.992322	0.04047	TRUE	reported	textfile	12	105757994	0.0244	3.1e-06	14286	GCST90274764.txt	TRUE	reported	textfile	TRUE	0.00152031	21.7492	34.73
	rs55843637	C	G	C	G	0.0555	-0.0040801	0.5296	0.506142	FALSE	TRUE	TRUE	CffBSP	1508222	0.862725	0.0235971	TRUE	reported	textfile	18	1508223	0.0121	4.5e-06	14286	GCST90274764.txt	TRUE	reported	textfile	FALSE	0.0014705	21.0356	34.73
	rs6894241	A	C	A	C	-0.0656	-0.0108986	0.2333	0.760515	FALSE	FALSE	FALSE	CffBSP	118722431	0.690637	0.0273841	TRUE	reported	textfile	5	118058126	0.0137	1.68e-06	14715	GCST90274764.txt	TRUE	reported	textfile	TRUE	0.00155572	22.9249	34.73
	rs73171545	A	G	A	G	-0.0861	-0.000969822	0.1199	0.884675	FALSE	FALSE	FALSE	CffBSP	44607229	0.979177	0.0371571	TRUE	reported	textfile	22	45003109	0.0187	4.14e-06	14286	GCST90274764.txt	TRUE	reported	textfile	TRUE	0.00148173	21.1964	34.73
	rs73209015	A	T	A	T	-0.0913	-0.0507548	0.1104	0.100194	FALSE	TRUE	FALSE	CffBSP	11843458	0.191784	0.038883	TRUE	reported	textfile	8	11700967	0.0189	1.36e-06	14728	GCST90274764.txt	TRUE	reported	textfile	TRUE	0.00158193	23.3324	34.73
	rs757973	A	G	A	G	0.2002	-0.109254	0.09	0.931064	FALSE	FALSE	FALSE	CffBSP	75866349	0.0200129	0.0469684	TRUE	reported	textfile	7	75495667	0.0205	1.58e-22	14713	GCST90274764.txt	TRUE	reported	textfile	TRUE	0.0064404	95.3589	34.73
	rs79432525	T	G	T	G	0.1929	0.0533575	0.9754	0.00906747	FALSE	FALSE	FALSE	CffBSP	126494626	0.667782	0.12432	TRUE	reported	textfile	10	128183195	0.0422	4.85e-06	14247	GCST90274764.txt	TRUE	reported	textfile	TRUE	0.00146447	20.8919	34.73
	rs79684468	T	C	T	C	0.1502	0.124415	0.0433	0.95639	FALSE	FALSE	FALSE	CffBSP	43137828	0.0310006	0.0576781	TRUE	reported	textfile	3	43179320	0.0303	7.16e-07	14286	GCST90274764.txt	TRUE	reported	textfile	TRUE	0.00171711	24.5694	34.73
	rs79722574	T	C	T	C	-0.1215	-0.0183248	0.167	0.859522	FALSE	FALSE	FALSE	CffBSP	34292033	0.589027	0.0339193	TRUE	reported	textfile	17	32619052	0.0156	6.78e-15	14720	GCST90274764.txt	TRUE	reported	textfile	TRUE	0.00410402	60.6519	34.73
	rs8068185	T	C	T	C	0.0732	0.000173817	0.8434	0.130632	FALSE	FALSE	FALSE	CffBSP	12345264	0.995996	0.034639	TRUE	reported	textfile	17	12248581	0.016	4.76e-06	14727	GCST90274764.txt	TRUE	reported	textfile	TRUE	0.00141922	20.9278	34.73
	rs9303380	A	G	A	G	0.1213	0.069911	0.0494	0.958	FALSE	FALSE	FALSE	CffBSP	56040131	0.234319	0.0587829	TRUE	reported	textfile	17	54117492	0.0272	8.21e-06	14286	GCST90274764.txt	TRUE	reported	textfile	TRUE	0.00139017	19.8849	34.73
	rs9940390	T	C	T	C	-0.0818	0.0512106	0.7358	0.314815	FALSE	FALSE	FALSE	CffBSP	80018034	0.042925	0.0252962	TRUE	reported	textfile	16	80051931	0.0133	7.73e-10	14286	GCST90274764.txt	TRUE	reported	textfile	TRUE	0.00264085	37.8218	34.73
	rs9976282	A	G	A	G	-0.1678	0.0653805	0.0333	0.979628	FALSE	FALSE	FALSE	CffBSP	38221304	0.431586	0.0831304	TRUE	reported	textfile	21	39593226	0.0345	1.15e-06	14722	GCST90274764.txt	TRUE	reported	textfile	TRUE	0.00160429	23.653	34.73
GCST90274765	rs10242459	A	G	A	G	0.0729	0.0109586	0.8219	0.155234	FALSE	FALSE	FALSE	CffBSP	3871648	0.7349	0.0323629	TRUE	reported	textfile	7	3911280	0.0154	2.2e-06	14729	GCST90274765.txt	TRUE	reported	textfile	TRUE	0.00151908	22.4055	35.2314
	rs111317412	A	C	A	C	-0.1236	-0.0597307	0.9429	0.0343043	FALSE	FALSE	FALSE	CffBSP	48150001	0.367918	0.0663395	TRUE	reported	textfile	14	48619204	0.0274	6.45e-06	14288	GCST90274765.txt	TRUE	reported	textfile	TRUE	0.00142215	20.3458	35.2314
	rs11174279	A	T	A	T	-0.0694	0.00151785	0.1741	0.200767	FALSE	TRUE	FALSE	CffBSP	62007612	0.95879	0.0293746	TRUE	reported	textfile	12	62401393	0.0156	8.64e-06	14730	GCST90274765.txt	TRUE	reported	textfile	TRUE	0.00134179	19.7884	35.2314
	rs113139367	A	C	A	C	-0.2101	0.0973564	0.021	0.970061	FALSE	FALSE	FALSE	CffBSP	66382793	0.148212	0.0673339	TRUE	reported	textfile	2	66609925	0.043	1.03e-06	14242	GCST90274765.txt	TRUE	reported	textfile	TRUE	0.00167347	23.8701	35.2314
	rs113539352	C	G	C	G	0.4485	-0.229315	0.992	0.999468	FALSE	TRUE	FALSE	CffBSP	58531127	0.67414	0.545375	TRUE	reported	textfile	3	58516854	0.0922	1.15e-06	11439	GCST90274765.txt	TRUE	reported	textfile	TRUE	0.00206432	23.6585	35.2314
	rs115109204	T	C	T	C	0.3784	0.107607	0.0116	0.995522	FALSE	FALSE	FALSE	CffBSP	23807410	0.546102	0.178272	TRUE	reported	textfile	5	23807519	0.0842	6.99e-06	10795	GCST90274765.txt	TRUE	reported	textfile	TRUE	0.00186743	20.1928	35.2314
	rs11574915	A	C	A	C	-0.1464	-0.0108171	0.8639	0.154018	FALSE	FALSE	FALSE	CffBSP	34710087	0.738503	0.0324024	TRUE	reported	textfile	9	34710084	0.017	7.19e-18	14733	GCST90274765.txt	TRUE	reported	textfile	TRUE	0.00500856	74.1524	35.2314
	rs11877886	A	G	A	G	-0.1065	0.0206754	0.0669	0.91808	FALSE	FALSE	FALSE	CffBSP	71559341	0.631052	0.0430517	TRUE	reported	textfile	18	69226577	0.0239	8.35e-06	14722	GCST90274765.txt	TRUE	reported	textfile	TRUE	0.00134695	19.8538	35.2314
	rs11961362	T	C	T	C	-0.1185	0.0210936	0.0713	0.917115	FALSE	FALSE	FALSE	CffBSP	80294862	0.62156	0.0427306	TRUE	reported	textfile	6	81004579	0.0264	7.17e-06	12851	GCST90274765.txt	TRUE	reported	textfile	TRUE	0.00156535	20.1447	35.2314
	rs12521515	A	T	A	T	0.086	0.023403	0.861	0.831398	FALSE	TRUE	FALSE	CffBSP	123785620	0.458945	0.0316007	TRUE	reported	textfile	5	123121314	0.0192	7.49e-06	11780	GCST90274765.txt	TRUE	reported	textfile	TRUE	0.00170024	20.0595	35.2314
	rs13010492	C	G	C	G	-0.0803	0.015577	0.4754	0.365681	FALSE	TRUE	TRUE	CffBSP	203911453	0.522283	0.0243456	TRUE	reported	textfile	2	204776176	0.0123	6.65e-11	13422	GCST90274765.txt	TRUE	reported	textfile	FALSE	0.00316539	42.6144	35.2314
	rs13212719	A	G	A	G	0.0671	-0.0221381	0.8005	0.146798	FALSE	FALSE	FALSE	CffBSP	133514298	0.506046	0.0332901	TRUE	reported	textfile	6	133835436	0.015	7.7e-06	14288	GCST90274765.txt	TRUE	reported	textfile	TRUE	0.00139857	20.0079	35.2314
	rs1328133	A	T	A	T	0.3112	0.0132481	0.01	0.00478889	FALSE	TRUE	FALSE	CffBSP	9709894	0.940175	0.176526	TRUE	reported	textfile	6	9710127	0.0695	7.55e-06	13422	GCST90274765.txt	TRUE	reported	textfile	TRUE	0.00149157	20.0468	35.2314
	rs138108512	A	G	A	G	-0.2939	-0.0101621	0.0119	0.994414	FALSE	FALSE	FALSE	CffBSP	76388948	0.948175	0.156342	TRUE	reported	textfile	14	76855291	0.0616	1.83e-06	13422	GCST90274765.txt	TRUE	reported	textfile	TRUE	0.00169311	22.76	35.2314
	rs138440733	A	G	A	G	-0.1724	0.0142563	0.0585	0.937432	FALSE	FALSE	FALSE	CffBSP	17250353	0.780222	0.0510924	TRUE	reported	textfile	22	17731243	0.036	1.68e-06	12404	GCST90274765.txt	TRUE	reported	textfile	TRUE	0.00184546	22.9298	35.2314
	rs138618048	A	G	A	G	-0.2066	0.0253446	0.0209	0.991163	FALSE	FALSE	FALSE	CffBSP	99676204	0.839876	0.125436	TRUE	reported	textfile	14	100142541	0.046	7.08e-06	14247	GCST90274765.txt	TRUE	reported	textfile	TRUE	0.00141386	20.169	35.2314
	rs1415763	C	G	C	G	0.0757	0.065407	0.1687	0.197053	FALSE	TRUE	FALSE	CffBSP	124706630	0.0285154	0.0298646	TRUE	reported	textfile	6	125027776	0.0157	1.42e-06	14731	GCST90274765.txt	TRUE	reported	textfile	TRUE	0.00157571	23.2452	35.2314
	rs147708384	T	C	T	C	-0.2707	-0.0734396	0.0151	0.993949	FALSE	FALSE	FALSE	CffBSP	15015108	0.649083	0.161392	TRUE	reported	textfile	17	14918425	0.0574	2.4e-06	13801	GCST90274765.txt	TRUE	reported	textfile	TRUE	0.00160895	22.2377	35.2314
	rs2070746	T	G	T	G	-0.0575	0.00847715	0.307	0.712964	FALSE	FALSE	FALSE	CffBSP	51746449	0.744502	0.0260117	TRUE	reported	textfile	19	52249702	0.0128	7.05e-06	14288	GCST90274765.txt	TRUE	reported	textfile	TRUE	0.00141036	20.1769	35.2314
	rs34791102	A	G	A	G	0.1238	-0.0785199	0.0534	0.97224	FALSE	FALSE	FALSE	CffBSP	35612981	0.273582	0.0717175	TRUE	reported	textfile	9	35612978	0.0265	2.99e-06	14735	GCST90274765.txt	TRUE	reported	textfile	TRUE	0.00147896	21.8218	35.2314
	rs374784992	A	G	A	G	0.1335	-0.00259785	0.9401	0.0759509	FALSE	FALSE	FALSE	CffBSP	118663884	0.954376	0.0454066	TRUE	reported	textfile	4	119585039	0.0298	7.47e-06	11760	GCST90274765.txt	TRUE	reported	textfile	TRUE	0.00170366	20.0658	35.2314
	rs3792790	A	C	A	C	0.0551	-0.00737177	0.4736	0.545444	FALSE	FALSE	FALSE	CffBSP	151062610	0.755899	0.0237134	TRUE	reported	textfile	5	150442171	0.012	4.4e-06	14288	GCST90274765.txt	TRUE	reported	textfile	TRUE	0.00147343	21.0805	35.2314
	rs4356912	T	C	T	C	-0.0592	-0.019535	0.6909	0.285119	FALSE	FALSE	FALSE	CffBSP	7443119	0.454664	0.0261282	TRUE	reported	textfile	4	7444846	0.0133	8.54e-06	14288	GCST90274765.txt	TRUE	reported	textfile	TRUE	0.00138474	19.8098	35.2314
	rs454265	A	G	A	G	-0.0561	-0.00958374	0.6505	0.318746	FALSE	FALSE	FALSE	CffBSP	80426907	0.704043	0.025229	TRUE	reported	textfile	8	81339142	0.0124	6.06e-06	14728	GCST90274765.txt	TRUE	reported	textfile	TRUE	0.00138783	20.4655	35.2314
	rs4554017	T	C	T	C	0.0596	-0.00139021	0.3904	0.563225	FALSE	FALSE	FALSE	CffBSP	144202871	0.953305	0.0237413	TRUE	reported	textfile	4	145124024	0.0122	1.03e-06	14288	GCST90274765.txt	TRUE	reported	textfile	TRUE	0.00166754	23.8623	35.2314
	rs4766578	A	T	A	T	-0.0801	-0.0560399	0.5095	0.570714	FALSE	TRUE	TRUE	CffBSP	111466567	0.0186046	0.0238127	TRUE	reported	textfile	12	111904371	0.0132	1.29e-09	11785	GCST90274765.txt	TRUE	reported	textfile	FALSE	0.00311482	36.8166	35.2314
	rs4907572	A	G	A	G	-0.0671	-0.0159902	0.2653	0.718305	FALSE	FALSE	FALSE	CffBSP	112993007	0.542201	0.0262355	TRUE	reported	textfile	13	113647321	0.0137	9.69e-07	14722	GCST90274765.txt	TRUE	reported	textfile	TRUE	0.00162678	23.9853	35.2314
	rs62292952	T	G	T	G	0.2346	0.00903364	0.8822	0.130084	FALSE	FALSE	FALSE	CffBSP	132481875	0.797406	0.0351906	TRUE	reported	textfile	3	132200719	0.0185	7.53e-37	14728	GCST90274765.txt	TRUE	reported	textfile	TRUE	0.0108007	160.788	35.2314
	rs6486995	A	T	A	T	-0.0697	-0.0662996	0.2452	0.244192	FALSE	TRUE	FALSE	CffBSP	19661047	0.0153236	0.0273441	TRUE	reported	textfile	12	19813981	0.0135	2.43e-07	14735	GCST90274765.txt	TRUE	reported	textfile	TRUE	0.00180577	26.6526	35.2314
	rs6535499	T	C	T	C	-0.1216	-0.0588466	0.0583	0.964277	FALSE	FALSE	FALSE	CffBSP	75503551	0.35992	0.064277	TRUE	reported	textfile	4	76428761	0.0272	7.8e-06	14288	GCST90274765.txt	TRUE	reported	textfile	TRUE	0.00139685	19.9834	35.2314
	rs6870560	T	C	T	C	0.0863	0.0188835	0.8559	0.161027	FALSE	FALSE	FALSE	CffBSP	174760916	0.55668	0.0321268	TRUE	reported	textfile	5	174187919	0.0169	3.28e-07	14732	GCST90274765.txt	TRUE	reported	textfile	TRUE	0.00176693	26.0729	35.2314
	rs7185085	T	C	T	C	-0.3558	-0.176585	0.9931	0.000963907	FALSE	FALSE	FALSE	CffBSP	82112680	0.622071	0.358244	TRUE	reported	textfile	16	82146285	0.0803	9.38e-06	12291	GCST90274765.txt	TRUE	reported	textfile	TRUE	0.00159478	19.6295	35.2314
	rs73257451	T	C	T	C	-0.3645	-0.0377765	0.989	0.021614	FALSE	FALSE	FALSE	CffBSP	60505571	0.650864	0.0834726	TRUE	reported	textfile	8	61418130	0.0756	1.43e-06	11337	GCST90274765.txt	TRUE	reported	textfile	TRUE	0.00204627	23.2421	35.2314
	rs74764632	A	T	A	T	0.1349	0.0529783	0.9557	0.937776	FALSE	TRUE	FALSE	CffBSP	57266675	0.278128	0.0488489	TRUE	reported	textfile	16	57300587	0.0294	4.47e-06	14734	GCST90274765.txt	TRUE	reported	textfile	TRUE	0.00142688	21.0509	35.2314
	rs7595241	C	G	C	G	0.0615	-0.00613998	0.6941	0.650661	FALSE	TRUE	FALSE	CffBSP	7285344	0.804071	0.0247498	TRUE	reported	textfile	2	7425475	0.013	2.24e-06	14288	GCST90274765.txt	TRUE	reported	textfile	TRUE	0.00156391	22.377	35.2314
	rs76295077	T	C	T	C	0.0928	0.00772566	0.8962	0.0953714	FALSE	FALSE	FALSE	CffBSP	22683813	0.846451	0.0398952	TRUE	reported	textfile	13	23257952	0.0208	8.14e-06	14288	GCST90274765.txt	TRUE	reported	textfile	TRUE	0.00139121	19.9025	35.2314
	rs79086127	T	C	T	C	-0.2096	-0.0160743	0.0195	0.994966	FALSE	FALSE	FALSE	CffBSP	122918108	0.923621	0.167661	TRUE	reported	textfile	4	123839263	0.045	3.2e-06	14247	GCST90274765.txt	TRUE	reported	textfile	TRUE	0.00152045	21.6918	35.2314
	rs9469127	C	G	C	G	-0.4884	-0.0644475	0.9365	0.903172	FALSE	TRUE	FALSE	CffBSP	32476316	0.10872	0.0401799	TRUE	reported	textfile	6	32444093	0.0277	1.41e-69	14735	GCST90274765.txt	TRUE	reported	textfile	TRUE	0.0206621	310.837	35.2314
GCST90274766	rs10207134	T	C	T	C	-0.0996	-0.0300959	0.326	0.77055	FALSE	FALSE	FALSE	CffBSP	227797112	0.281522	0.0279466	TRUE	reported	textfile	2	228661828	0.0128	7.18e-15	14287	GCST90274766.txt	TRUE	reported	textfile	TRUE	0.00422008	60.5394	24.1731
	rs1027232	A	C	A	C	0.1072	-0.0297835	0.0762	0.848363	FALSE	FALSE	FALSE	CffBSP	39785747	0.370212	0.0332376	TRUE	reported	textfile	15	40077948	0.0238	6.66e-06	14730	GCST90274766.txt	TRUE	reported	textfile	TRUE	0.00137542	20.2851	24.1731
	rs10837780	T	C	T	C	0.1191	-0.012057	0.9413	0.055944	FALSE	FALSE	FALSE	CffBSP	42121237	0.81546	0.0516608	TRUE	reported	textfile	11	42142787	0.026	4.63e-06	14288	GCST90274766.txt	TRUE	reported	textfile	TRUE	0.00146645	20.9805	24.1731
	rs111674022	T	C	T	C	-0.0953	0.0586997	0.0967	0.909363	FALSE	FALSE	FALSE	CffBSP	238442722	0.152926	0.0410696	TRUE	reported	textfile	1	238606022	0.0208	4.61e-06	14288	GCST90274766.txt	TRUE	reported	textfile	TRUE	0.00146707	20.9893	24.1731
	rs11242693	T	C	T	C	0.0637	-0.0142693	0.3674	0.566055	FALSE	FALSE	FALSE	CffBSP	1447955	0.550572	0.0239056	TRUE	reported	textfile	6	1448190	0.0135	2.38e-06	12404	GCST90274766.txt	TRUE	reported	textfile	TRUE	0.00179172	22.2608	24.1731
	rs1129474	T	C	T	C	0.0573	-0.0128861	0.5396	0.451744	FALSE	FALSE	FALSE	CffBSP	22727205	0.586519	0.0236927	TRUE	reported	textfile	8	22584718	0.012	1.8e-06	14288	GCST90274766.txt	TRUE	reported	textfile	TRUE	0.00159325	22.7974	24.1731
	rs11582772	T	C	T	C	0.2585	0.143073	0.9859	0.00442712	FALSE	FALSE	FALSE	CffBSP	31794961	0.420679	0.177677	TRUE	reported	textfile	1	32260562	0.0548	2.39e-06	14243	GCST90274766.txt	TRUE	reported	textfile	TRUE	0.00155984	22.2484	24.1731
	rs117753190	C	G	C	G	-0.185	-0.0531784	0.9688	0.989319	FALSE	TRUE	FALSE	CffBSP	69140184	0.641193	0.114109	TRUE	reported	textfile	17	67136325	0.0359	2.56e-07	14243	GCST90274766.txt	TRUE	reported	textfile	TRUE	0.00186099	26.5518	24.1731
	rs117900576	C	G	C	G	-0.2256	0.0828186	0.9694	0.989826	FALSE	TRUE	FALSE	CffBSP	74765056	0.47536	0.116028	TRUE	reported	textfile	17	72761195	0.0429	1.45e-07	13224	GCST90274766.txt	TRUE	reported	textfile	TRUE	0.00208686	27.6502	24.1731
	rs118164045	T	C	T	C	0.1297	-0.0389627	0.9526	0.0410081	FALSE	FALSE	FALSE	CffBSP	92326295	0.505924	0.0585731	TRUE	reported	textfile	14	92792639	0.0289	7.19e-06	14288	GCST90274766.txt	TRUE	reported	textfile	TRUE	0.00140767	20.1383	24.1731
	rs13049624	A	G	A	G	-0.1315	-0.0209734	0.9476	0.0713534	FALSE	FALSE	FALSE	CffBSP	42584892	0.64631	0.0457043	TRUE	reported	textfile	21	44005002	0.0276	1.89e-06	14288	GCST90274766.txt	TRUE	reported	textfile	TRUE	0.00158625	22.6972	24.1731
	rs13185268	T	C	T	C	0.1091	0.0520934	0.9296	0.0823693	FALSE	FALSE	FALSE	CffBSP	133683851	0.225623	0.0429916	TRUE	reported	textfile	5	133019542	0.0239	5e-06	14724	GCST90274766.txt	TRUE	reported	textfile	TRUE	0.00141323	20.8351	24.1731
	rs151092565	T	C	T	C	-0.1512	-0.0805723	0.0376	0.975023	FALSE	FALSE	FALSE	CffBSP	94159206	0.279563	0.0745142	TRUE	reported	textfile	14	94625543	0.0328	4.03e-06	14728	GCST90274766.txt	TRUE	reported	textfile	TRUE	0.00144074	21.247	24.1731
	rs2003431	A	T	A	T	-0.1602	-0.0161405	0.0632	0.0478218	FALSE	TRUE	FALSE	CffBSP	106326275	0.781225	0.0581175	TRUE	reported	textfile	14	106782532	0.0344	3.21e-06	9786	GCST90274766.txt	TRUE	reported	textfile	TRUE	0.00221127	21.683	24.1731
	rs2796032	T	C	T	C	0.0636	0.0404514	0.3159	0.679648	FALSE	FALSE	FALSE	CffBSP	112757624	0.107986	0.0251671	TRUE	reported	textfile	9	115519904	0.0127	5.5e-07	14718	GCST90274766.txt	TRUE	reported	textfile	TRUE	0.00170106	25.0754	24.1731
	rs34729167	T	C	T	C	0.0801	0.0169814	0.136	0.801837	FALSE	FALSE	FALSE	CffBSP	162522101	0.566207	0.0296026	TRUE	reported	textfile	6	162943133	0.0179	7.65e-06	14288	GCST90274766.txt	TRUE	reported	textfile	TRUE	0.00139952	20.0216	24.1731
	rs348389	T	C	T	C	-0.055	0.0237902	0.3574	0.646338	FALSE	FALSE	FALSE	CffBSP	6535626	0.3381	0.0248351	TRUE	reported	textfile	19	6535637	0.0124	9.19e-06	14288	GCST90274766.txt	TRUE	reported	textfile	TRUE	0.00137503	19.6708	24.1731
	rs35757792	A	T	A	T	-0.053	0.000850138	0.4995	0.498094	FALSE	TRUE	TRUE	CffBSP	45115711	0.971492	0.0237887	TRUE	reported	textfile	3	45157203	0.0119	8.44e-06	14720	GCST90274766.txt	TRUE	reported	textfile	FALSE	0.00134575	19.8335	24.1731
	rs35833676	T	C	T	C	0.0804	-0.0277819	0.1452	0.875977	FALSE	FALSE	FALSE	CffBSP	31588943	0.436821	0.0357291	TRUE	reported	textfile	21	32961256	0.0166	1.28e-06	14732	GCST90274766.txt	TRUE	reported	textfile	TRUE	0.0015898	23.4551	24.1731
	rs3798304	C	G	C	G	-0.0624	0.00688611	0.7473	0.759975	FALSE	TRUE	FALSE	CffBSP	166949946	0.803223	0.0276354	TRUE	reported	textfile	6	167363434	0.0138	6.13e-06	14287	GCST90274766.txt	TRUE	reported	textfile	TRUE	0.00142905	20.4433	24.1731
	rs41302923	A	G	A	G	0.1939	0.0869931	0.9774	0.0268226	FALSE	FALSE	FALSE	CffBSP	126004910	0.246517	0.0750684	TRUE	reported	textfile	10	127693479	0.0414	2.82e-06	14726	GCST90274766.txt	TRUE	reported	textfile	TRUE	0.00148739	21.9329	24.1731
	rs4981022	A	G	A	G	0.0635	0.00809031	0.6933	0.317555	FALSE	FALSE	FALSE	CffBSP	103756096	0.749917	0.0253813	TRUE	reported	textfile	12	104149874	0.0128	7.02e-07	14721	GCST90274766.txt	TRUE	reported	textfile	TRUE	0.00166903	24.6076	24.1731
	rs55891514	T	C	T	C	0.0955	-0.0488068	0.9122	0.0432897	FALSE	FALSE	FALSE	CffBSP	40408837	0.403595	0.058436	TRUE	reported	textfile	5	40408939	0.0213	7.34e-06	14735	GCST90274766.txt	TRUE	reported	textfile	TRUE	0.0013624	20.0997	24.1731
	rs5769672	T	G	T	G	-0.1184	-0.0554291	0.9406	0.0196046	FALSE	FALSE	FALSE	CffBSP	49484105	0.513627	0.0848577	TRUE	reported	textfile	22	49877754	0.0257	4.09e-06	14732	GCST90274766.txt	TRUE	reported	textfile	TRUE	0.00143863	21.2216	24.1731
	rs61945278	T	C	T	C	-0.2	0.0573822	0.028	0.976745	FALSE	FALSE	FALSE	CffBSP	23950198	0.476541	0.0806069	TRUE	reported	textfile	13	24524337	0.0451	9.22e-06	13386	GCST90274766.txt	TRUE	reported	textfile	TRUE	0.00146696	19.6626	24.1731
	rs62456601	T	C	T	C	0.0611	0.00623699	0.6697	0.399302	FALSE	FALSE	FALSE	CffBSP	55723460	0.796001	0.0241252	TRUE	reported	textfile	7	55791153	0.0137	8.2e-06	12836	GCST90274766.txt	TRUE	reported	textfile	TRUE	0.00154717	19.8872	24.1731
	rs6420556	T	C	T	C	-0.0736	0.00568164	0.1755	0.821585	FALSE	FALSE	FALSE	CffBSP	58820374	0.853316	0.0307301	TRUE	reported	textfile	18	56487606	0.0158	3.19e-06	14288	GCST90274766.txt	TRUE	reported	textfile	TRUE	0.00151639	21.696	24.1731
	rs6498925	A	T	A	T	-0.0568	-0.0207828	0.6585	0.643975	FALSE	TRUE	FALSE	CffBSP	63761917	0.398376	0.0246088	TRUE	reported	textfile	16	63795821	0.0125	5.52e-06	14729	GCST90274766.txt	TRUE	reported	textfile	TRUE	0.00139989	20.6451	24.1731
	rs73072893	A	G	A	G	0.2057	-0.0862007	0.9739	0.0343872	FALSE	FALSE	FALSE	CffBSP	19504606	0.17034	0.0628692	TRUE	reported	textfile	12	19657540	0.0422	1.09e-06	13230	GCST90274766.txt	TRUE	reported	textfile	TRUE	0.00179269	23.7563	24.1731
	rs742493	T	C	T	C	0.1459	0.0785787	0.883	0.0964679	FALSE	FALSE	FALSE	CffBSP	41030428	0.0479733	0.0397343	TRUE	reported	textfile	6	40998167	0.0185	3.11e-15	14735	GCST90274766.txt	TRUE	reported	textfile	TRUE	0.00420327	62.1882	24.1731
	rs748503	T	C	T	C	-0.0722	0.0487701	0.1993	0.711985	FALSE	FALSE	FALSE	CffBSP	71749708	0.0653236	0.0264618	TRUE	reported	textfile	10	73509465	0.0162	8.32e-06	14288	GCST90274766.txt	TRUE	reported	textfile	TRUE	0.00138826	19.8602	24.1731
	rs7749768	T	G	T	G	-0.0622	-0.0337797	0.754	0.192892	FALSE	FALSE	FALSE	CffBSP	107156397	0.261403	0.0300776	TRUE	reported	textfile	6	107477601	0.0138	6.57e-06	14709	GCST90274766.txt	TRUE	reported	textfile	TRUE	0.00137924	20.3125	24.1731
	rs9274623	T	G	T	G	-0.076	-0.00973697	0.215	0.859306	FALSE	FALSE	FALSE	CffBSP	32668221	0.773884	0.0338915	TRUE	reported	textfile	6	32635998	0.0148	2.82e-07	14288	GCST90274766.txt	TRUE	reported	textfile	TRUE	0.00184218	26.3659	24.1731
	rs9357723	A	G	A	G	0.0522	0.0171589	0.4744	0.539201	FALSE	FALSE	FALSE	CffBSP	52088299	0.4683	0.0236593	TRUE	reported	textfile	6	51953097	0.0116	6.8e-06	14735	GCST90274766.txt	TRUE	reported	textfile	TRUE	0.00137239	20.2473	24.1731
GCST90274767	rs1001495	T	C	T	C	0.0983	-0.0740305	0.9113	0.0928342	FALSE	FALSE	FALSE	CffBSP	240707925	0.0697317	0.0408185	TRUE	reported	textfile	2	241647342	0.0215	4.83e-06	13650	GCST90274767.txt	TRUE	reported	textfile	TRUE	0.00152909	20.901	59.224
	rs11017721	A	G	A	G	0.0971	-0.0108975	0.1154	0.899098	FALSE	FALSE	FALSE	CffBSP	131107162	0.777798	0.0386175	TRUE	reported	textfile	10	132905425	0.0186	1.79e-07	14288	GCST90274767.txt	TRUE	reported	textfile	TRUE	0.00190377	27.2491	59.224
	rs113959305	T	C	T	C	-0.1397	0.055538	0.0559	0.968277	FALSE	FALSE	FALSE	CffBSP	50637853	0.431192	0.0705555	TRUE	reported	textfile	22	51076281	0.0285	9.5e-07	13224	GCST90274767.txt	TRUE	reported	textfile	TRUE	0.00181364	24.0236	59.224
	rs116683909	A	G	A	G	-0.21	-0.0614487	0.0278	0.972748	FALSE	FALSE	FALSE	CffBSP	14404403	0.400928	0.0731562	TRUE	reported	textfile	3	14445911	0.0426	8.24e-07	14724	GCST90274767.txt	TRUE	reported	textfile	TRUE	0.0016477	24.2974	59.224
	rs117639761	A	C	A	C	-0.3246	0.00632913	0.9561	0.0209478	FALSE	FALSE	FALSE	CffBSP	35868176	0.939579	0.0834992	TRUE	reported	textfile	17	34195180	0.0413	3.85e-15	14736	GCST90274767.txt	TRUE	reported	textfile	TRUE	0.00417446	61.7644	59.224
	rs12103669	A	G	A	G	-0.1778	-0.215487	0.0234	0.991392	FALSE	FALSE	FALSE	CffBSP	49220739	0.0894932	0.1269	TRUE	reported	textfile	17	47298101	0.0402	9.74e-06	14734	GCST90274767.txt	TRUE	reported	textfile	TRUE	0.00132591	19.5593	59.224
	rs12204524	C	G	C	G	0.1164	-0.078862	0.9291	0.950052	FALSE	TRUE	FALSE	CffBSP	85435025	0.146324	0.0542889	TRUE	reported	textfile	6	86144743	0.0237	9.04e-07	14727	GCST90274767.txt	TRUE	reported	textfile	TRUE	0.00163525	24.1185	59.224
	rs12949647	A	G	A	G	-0.0643	0.0511342	0.7287	0.299068	FALSE	FALSE	FALSE	CffBSP	21483148	0.0473969	0.0257898	TRUE	reported	textfile	17	21386459	0.0137	2.69e-06	14288	GCST90274767.txt	TRUE	reported	textfile	TRUE	0.00153936	22.0252	59.224
	rs143566774	A	G	A	G	0.1738	0.0321488	0.0369	0.97284	FALSE	FALSE	FALSE	CffBSP	35949068	0.663036	0.0737822	TRUE	reported	textfile	17	34276072	0.0372	2.98e-06	14288	GCST90274767.txt	TRUE	reported	textfile	TRUE	0.00152538	21.8249	59.224
	rs146074782	A	G	A	G	-0.3061	-0.00426698	0.0116	0.988497	FALSE	FALSE	FALSE	CffBSP	203472132	0.969729	0.112442	TRUE	reported	textfile	1	203441260	0.0626	1.01e-06	12935	GCST90274767.txt	TRUE	reported	textfile	TRUE	0.00184506	23.9062	59.224
	rs17092563	C	G	C	G	-0.202	-0.0109359	0.9774	0.990802	FALSE	TRUE	FALSE	CffBSP	114893332	0.929754	0.124054	TRUE	reported	textfile	10	116653091	0.0445	5.64e-06	14733	GCST90274767.txt	TRUE	reported	textfile	TRUE	0.00139664	20.6027	59.224
	rs17735284	A	T	A	T	0.0927	0.0462265	0.0922	0.0574479	FALSE	TRUE	FALSE	CffBSP	84661469	0.363275	0.0508463	TRUE	reported	textfile	11	84372512	0.0202	4.45e-06	14725	GCST90274767.txt	TRUE	reported	textfile	TRUE	0.00142817	21.0571	59.224
	rs1926742	A	G	A	G	0.0574	0.0261064	0.3093	0.685687	FALSE	FALSE	FALSE	CffBSP	18006553	0.304844	0.0254423	TRUE	reported	textfile	10	18295482	0.0125	4.39e-06	14725	GCST90274767.txt	TRUE	reported	textfile	TRUE	0.00142997	21.0836	59.224
	rs2263318	A	G	A	G	-0.1027	0.160597	0.0765	0.986321	FALSE	FALSE	FALSE	CffBSP	31464229	0.112594	0.101218	TRUE	reported	textfile	6	31432006	0.0232	9.57e-06	14735	GCST90274767.txt	TRUE	reported	textfile	TRUE	0.00132812	19.5932	59.224
	rs2870238	T	C	T	C	0.0574	0.00895543	0.4869	0.54535	FALSE	FALSE	FALSE	CffBSP	76451926	0.704764	0.0236356	TRUE	reported	textfile	4	77373079	0.0114	4.78e-07	14736	GCST90274767.txt	TRUE	reported	textfile	TRUE	0.00171747	25.3487	59.224
	rs2905095	T	C	T	C	0.0664	0.000625108	0.3078	0.678058	FALSE	FALSE	FALSE	CffBSP	133027406	0.980249	0.0252498	TRUE	reported	textfile	9	135902793	0.0148	7.24e-06	11337	GCST90274767.txt	TRUE	reported	textfile	TRUE	0.00177233	20.125	59.224
	rs376974828	T	C	T	C	-0.1724	-0.0881943	0.0385	0.979531	FALSE	FALSE	FALSE	CffBSP	11515204	0.282668	0.0820913	TRUE	reported	textfile	19	11626019	0.039	9.85e-06	10696	GCST90274767.txt	TRUE	reported	textfile	TRUE	0.00182361	19.5373	59.224
	rs4317138	T	C	T	C	0.0585	-0.00770048	0.6736	0.337753	FALSE	FALSE	FALSE	CffBSP	46420653	0.757618	0.0249521	TRUE	reported	textfile	3	46462144	0.0127	4.1e-06	14288	GCST90274767.txt	TRUE	reported	textfile	TRUE	0.00148282	21.215	59.224
	rs438811	T	C	T	C	0.0669	-0.0325102	0.2405	0.764064	FALSE	FALSE	FALSE	CffBSP	44913484	0.24375	0.0278898	TRUE	reported	textfile	19	45416741	0.0138	1.25e-06	14720	GCST90274767.txt	TRUE	reported	textfile	TRUE	0.00159402	23.4982	59.224
	rs4719850	T	C	T	C	-0.0548	0.0177476	0.5907	0.289015	FALSE	FALSE	FALSE	CffBSP	3199346	0.496604	0.0261054	TRUE	reported	textfile	7	3238978	0.0118	3.42e-06	14726	GCST90274767.txt	TRUE	reported	textfile	TRUE	0.00146244	21.5644	59.224
	rs6497967	T	C	T	C	-0.0547	-0.00989491	0.3198	0.623624	FALSE	FALSE	FALSE	CffBSP	26879150	0.684633	0.0243628	TRUE	reported	textfile	16	26890471	0.0123	8.7e-06	14729	GCST90274767.txt	TRUE	reported	textfile	TRUE	0.00134094	19.7745	59.224
	rs712048	A	C	A	C	-0.5147	0.0554671	0.1497	0.878334	FALSE	FALSE	FALSE	CffBSP	35999179	0.123536	0.0360152	TRUE	reported	textfile	17	34326215	0.0158	8.99e-233	14723	GCST90274767.txt	TRUE	reported	textfile	TRUE	0.0672313	1061.05	59.224
	rs72625914	T	C	T	C	-0.2589	0.0170815	0.035	0.964674	FALSE	FALSE	FALSE	CffBSP	35665009	0.791332	0.0645605	TRUE	reported	textfile	17	33992028	0.0342	3.73e-14	14726	GCST90274767.txt	TRUE	reported	textfile	TRUE	0.0038765	57.2998	59.224
	rs73071153	A	G	A	G	-0.1497	-0.0555229	0.0393	0.968324	FALSE	FALSE	FALSE	CffBSP	17506340	0.404436	0.0665963	TRUE	reported	textfile	7	17545964	0.0319	2.7e-06	14728	GCST90274767.txt	TRUE	reported	textfile	TRUE	0.00149303	22.0193	59.224
	rs74127049	C	G	C	G	0.0603	-0.0109581	0.608	0.594277	FALSE	TRUE	FALSE	CffBSP	161612410	0.660394	0.0249405	TRUE	reported	textfile	1	161582200	0.0132	4.92e-06	13422	GCST90274767.txt	TRUE	reported	textfile	TRUE	0.00155237	20.8652	59.224
	rs74491711	A	G	A	G	0.1273	-0.00528432	0.048	0.944939	FALSE	FALSE	FALSE	CffBSP	40012867	0.918088	0.0513824	TRUE	reported	textfile	3	40054358	0.0278	4.67e-06	14735	GCST90274767.txt	TRUE	reported	textfile	TRUE	0.00142102	20.9656	59.224
	rs77083410	C	G	C	G	0.224	0.0594336	0.0223	0.0369366	FALSE	TRUE	FALSE	CffBSP	115211066	0.340543	0.0623587	TRUE	reported	textfile	11	115081786	0.0416	7.26e-08	14734	GCST90274767.txt	TRUE	reported	textfile	TRUE	0.00196397	28.9901	59.224
	rs77354000	A	G	A	G	-0.2064	-0.0364705	0.9788	0.0215065	FALSE	FALSE	FALSE	CffBSP	34144868	0.660374	0.0830013	TRUE	reported	textfile	10	34433796	0.0437	2.32e-06	14735	GCST90274767.txt	TRUE	reported	textfile	TRUE	0.00151164	22.3048	59.224
	rs79960240	T	G	T	G	-0.2384	0.10754	0.0143	0.991688	FALSE	FALSE	FALSE	CffBSP	94344719	0.394559	0.126313	TRUE	reported	textfile	14	94811056	0.0537	9.02e-06	14249	GCST90274767.txt	TRUE	reported	textfile	TRUE	0.00138127	19.7062	59.224
	rs80014265	T	C	T	C	0.1307	-0.0200302	0.0514	0.962105	FALSE	FALSE	FALSE	CffBSP	91417827	0.743563	0.0612288	TRUE	reported	textfile	9	94180109	0.0289	6.11e-06	14736	GCST90274767.txt	TRUE	reported	textfile	TRUE	0.00138603	20.4502	59.224
GCST90274768	rs10062773	A	T	A	T	0.0375	-0.00474182	0.5912	0.595708	FALSE	TRUE	FALSE	CffBSP	72150164	0.843934	0.0240868	TRUE	reported	textfile	5	71445991	0.0118	0.00148	14727	GCST90274768.txt	TRUE	reported	textfile	TRUE	0.000685309	10.0981	8.65064
	rs10113337	T	C	T	C	0.0389	0.0227354	0.3512	0.643621	FALSE	FALSE	FALSE	CffBSP	13524198	0.360018	0.0248385	TRUE	reported	textfile	8	13381707	0.0123	0.00156	14287	GCST90274768.txt	TRUE	reported	textfile	TRUE	0.000699591	10.0006	8.65064
	rs10123553	T	C	T	C	-0.0455	0.0186092	0.5773	0.417566	FALSE	FALSE	FALSE	CffBSP	90093138	0.436929	0.0239381	TRUE	reported	textfile	9	92855420	0.0119	0.000132	14734	GCST90274768.txt	TRUE	reported	textfile	TRUE	0.000991237	14.6174	8.65064
	rs10172996	A	G	A	G	0.0517	-0.0290964	0.1606	0.797335	FALSE	FALSE	FALSE	CffBSP	179273134	0.323037	0.0294428	TRUE	reported	textfile	2	180137861	0.0161	0.00132	14288	GCST90274768.txt	TRUE	reported	textfile	TRUE	0.000721181	10.3102	8.65064
	rs10175216	A	G	A	G	0.0552	0.0396704	0.2992	0.675938	FALSE	FALSE	FALSE	CffBSP	85060654	0.115157	0.0251807	TRUE	reported	textfile	2	85287777	0.0129	1.88e-05	14288	GCST90274768.txt	TRUE	reported	textfile	TRUE	0.00127989	18.3079	8.65064
	rs10219040	A	G	A	G	-0.0584	-0.0342157	0.8264	0.195966	FALSE	FALSE	FALSE	CffBSP	104153400	0.250619	0.0297826	TRUE	reported	textfile	10	105913158	0.0155	0.000165	14288	GCST90274768.txt	TRUE	reported	textfile	TRUE	0.000992566	14.1939	8.65064
	rs1025721	T	C	T	C	-0.0577	0.025811	0.2373	0.764861	FALSE	FALSE	FALSE	CffBSP	6632716	0.354153	0.0278567	TRUE	reported	textfile	9	6632716	0.0135	1.92e-05	14721	GCST90274768.txt	TRUE	reported	textfile	TRUE	0.00123939	18.2652	8.65064
	rs1026189	T	C	T	C	0.3138	0.201716	0.0092	0.998348	FALSE	FALSE	FALSE	CffBSP	128290784	0.48625	0.289704	TRUE	reported	textfile	7	127930837	0.0824	0.00014	9984	GCST90274768.txt	TRUE	reported	textfile	TRUE	0.0014505	14.4999	8.65064
	rs10403614	C	G	C	G	-0.0515	0.00405204	0.7456	0.706875	FALSE	TRUE	FALSE	CffBSP	48262037	0.875673	0.0258989	TRUE	reported	textfile	19	48765294	0.0133	0.000108	14733	GCST90274768.txt	TRUE	reported	textfile	TRUE	0.00101667	14.9917	8.65064
	rs10486490	T	C	T	C	-0.0621	0.0410986	0.1137	0.91095	FALSE	FALSE	FALSE	CffBSP	26033929	0.321816	0.041483	TRUE	reported	textfile	7	26073549	0.0189	0.00102	14288	GCST90274768.txt	TRUE	reported	textfile	TRUE	0.000755023	10.7944	8.65064
	rs10497445	T	C	T	C	0.1348	0.162407	0.0295	0.985306	FALSE	FALSE	FALSE	CffBSP	175852488	0.112561	0.10235	TRUE	reported	textfile	2	176717216	0.0422	0.0014	14249	GCST90274768.txt	TRUE	reported	textfile	TRUE	0.000715582	10.2022	8.65064
	rs10501776	T	G	T	G	0.1011	-0.0112674	0.0381	0.933554	FALSE	FALSE	FALSE	CffBSP	92251876	0.813629	0.0477942	TRUE	reported	textfile	11	91985042	0.031	0.00111	14726	GCST90274768.txt	TRUE	reported	textfile	TRUE	0.00072174	10.6346	8.65064
	rs10520693	T	C	T	C	-0.0847	-0.0764599	0.9451	0.062366	FALSE	FALSE	FALSE	CffBSP	90609113	0.11086	0.0479571	TRUE	reported	textfile	15	91152345	0.0258	0.00103	14736	GCST90274768.txt	TRUE	reported	textfile	TRUE	0.000730853	10.7763	8.65064
	rs10778429	A	T	A	T	-0.0467	0.047196	0.3201	0.312575	FALSE	TRUE	FALSE	CffBSP	105709025	0.062339	0.0253214	TRUE	reported	textfile	12	106102803	0.0123	0.000147	14718	GCST90274768.txt	TRUE	reported	textfile	TRUE	0.000978475	14.4133	8.65064
	rs10792444	T	C	T	C	-0.0865	-0.00653891	0.8838	0.116404	FALSE	FALSE	FALSE	CffBSP	64666679	0.861347	0.0374379	TRUE	reported	textfile	11	64434151	0.0181	1.76e-06	14732	GCST90274768.txt	TRUE	reported	textfile	TRUE	0.00154789	22.8358	8.65064
	rs10802510	T	C	T	C	0.0496	-0.0136933	0.2922	0.743211	FALSE	FALSE	FALSE	CffBSP	247465207	0.611413	0.0269524	TRUE	reported	textfile	1	247628509	0.0128	0.000107	14713	GCST90274768.txt	TRUE	reported	textfile	TRUE	0.00101953	15.0136	8.65064
	rs1081075	A	T	A	T	-0.1326	-0.0346756	0.0306	0.0213189	FALSE	TRUE	FALSE	CffBSP	132610294	0.667281	0.0806631	TRUE	reported	textfile	6	132931433	0.0353	0.000172	14736	GCST90274768.txt	TRUE	reported	textfile	TRUE	0.000956626	14.1084	8.65064
	rs10813387	A	C	A	C	0.0392	-0.00182185	0.6068	0.323011	FALSE	FALSE	FALSE	CffBSP	30973612	0.942371	0.025202	TRUE	reported	textfile	9	30973610	0.012	0.00109	14288	GCST90274768.txt	TRUE	reported	textfile	TRUE	0.000746301	10.6696	8.65064
	rs10820182	A	G	A	G	0.0455	-0.0208602	0.4776	0.48229	FALSE	FALSE	FALSE	CffBSP	102431830	0.377234	0.0236241	TRUE	reported	textfile	9	105194112	0.0117	0.000101	14288	GCST90274768.txt	TRUE	reported	textfile	TRUE	0.00105735	15.1213	8.65064
	rs10820749	A	C	A	C	0.0372	-0.0295677	0.5083	0.503361	FALSE	FALSE	FALSE	CffBSP	104926761	0.211315	0.0236549	TRUE	reported	textfile	9	107689042	0.0117	0.00148	14720	GCST90274768.txt	TRUE	reported	textfile	TRUE	0.000686291	10.1078	8.65064
	rs10845764	A	G	A	G	-0.0475	0.0205128	0.1867	0.858853	FALSE	FALSE	FALSE	CffBSP	13419247	0.545298	0.0339155	TRUE	reported	textfile	12	13572181	0.0148	0.00133	14729	GCST90274768.txt	TRUE	reported	textfile	TRUE	0.000698855	10.2992	8.65064
	rs10886404	T	C	T	C	0.0454	0.0400772	0.6053	0.376719	FALSE	FALSE	FALSE	CffBSP	119145162	0.0975866	0.0241914	TRUE	reported	textfile	10	120904674	0.0122	0.000198	14288	GCST90274768.txt	TRUE	reported	textfile	TRUE	0.000968278	13.8462	8.65064
	rs10977555	A	G	A	G	0.0469	0.0354171	0.7907	0.15071	FALSE	FALSE	FALSE	CffBSP	9187539	0.285601	0.0331677	TRUE	reported	textfile	9	9187539	0.0144	0.00113	14733	GCST90274768.txt	TRUE	reported	textfile	TRUE	0.000719477	10.6062	8.65064
	rs10987418	A	G	A	G	-0.0388	0.0105518	0.5453	0.540306	FALSE	FALSE	FALSE	CffBSP	126700284	0.654807	0.0236008	TRUE	reported	textfile	9	129462563	0.0118	0.00101	14287	GCST90274768.txt	TRUE	reported	textfile	TRUE	0.000756188	10.8103	8.65064
	rs10995818	T	C	T	C	0.0688	0.030136	0.9023	0.114438	FALSE	FALSE	FALSE	CffBSP	64120818	0.417027	0.037132	TRUE	reported	textfile	10	65880579	0.0211	0.00111	12842	GCST90274768.txt	TRUE	reported	textfile	TRUE	0.000827218	10.6303	8.65064
	rs11022371	A	G	A	G	-0.0418	-0.00932764	0.2844	0.709752	FALSE	FALSE	FALSE	CffBSP	12483045	0.719769	0.025999	TRUE	reported	textfile	11	12504592	0.0128	0.00109	14725	GCST90274768.txt	TRUE	reported	textfile	TRUE	0.000723707	10.6629	8.65064
	rs1105631	T	C	T	C	-0.2074	0.192436	0.0161	0.995712	FALSE	FALSE	FALSE	CffBSP	234426439	0.293297	0.183113	TRUE	reported	textfile	2	235335083	0.0534	0.000103	13801	GCST90274768.txt	TRUE	reported	textfile	TRUE	0.00109182	15.0825	8.65064
	rs11062074	T	C	T	C	0.1362	-0.0540531	0.0274	0.967683	FALSE	FALSE	FALSE	CffBSP	2020400	0.420272	0.0670676	TRUE	reported	textfile	12	2129566	0.0426	0.00139	11785	GCST90274768.txt	TRUE	reported	textfile	TRUE	0.00086662	10.2202	8.65064
	rs11075475	T	G	T	G	0.0411	-0.019995	0.6612	0.359747	FALSE	FALSE	FALSE	CffBSP	62475336	0.41401	0.0244779	TRUE	reported	textfile	16	62509240	0.0125	0.00101	14288	GCST90274768.txt	TRUE	reported	textfile	TRUE	0.000756073	10.8094	8.65064
	rs11083270	T	C	T	C	0.0733	-0.0194871	0.108	0.863236	FALSE	FALSE	FALSE	CffBSP	28342008	0.571614	0.0344493	TRUE	reported	textfile	18	25921972	0.0194	0.000158	14288	GCST90274768.txt	TRUE	reported	textfile	TRUE	0.000998158	14.2739	8.65064
	rs11126621	T	C	T	C	0.0508	0.00211206	0.8169	0.150043	FALSE	FALSE	FALSE	CffBSP	77558294	0.949148	0.0331163	TRUE	reported	textfile	2	77785420	0.0156	0.00113	14288	GCST90274768.txt	TRUE	reported	textfile	TRUE	0.000741625	10.6027	8.65064
	rs111437511	T	C	T	C	0.1437	0.00952434	0.0428	0.974494	FALSE	FALSE	FALSE	CffBSP	10836491	0.89815	0.0744095	TRUE	reported	textfile	8	10694001	0.0297	1.31e-06	14733	GCST90274768.txt	TRUE	reported	textfile	TRUE	0.00158643	23.4068	8.65064
	rs111600242	A	G	A	G	0.1406	0.0628244	0.0233	0.973552	FALSE	FALSE	FALSE	CffBSP	122840675	0.403643	0.0752267	TRUE	reported	textfile	2	123598251	0.043	0.00108	14720	GCST90274768.txt	TRUE	reported	textfile	TRUE	0.000725789	10.6899	8.65064
	rs111753891	A	G	A	G	0.1592	0.145667	0.023	0.992108	FALSE	FALSE	FALSE	CffBSP	52548674	0.26803	0.131515	TRUE	reported	textfile	6	52413472	0.0416	0.00013	14733	GCST90274768.txt	TRUE	reported	textfile	TRUE	0.000993063	14.6434	8.65064
	rs111825581	T	C	T	C	0.796	0.0284791	0.164	0.803972	FALSE	FALSE	FALSE	CffBSP	8051358	0.341064	0.029913	TRUE	reported	textfile	19	8116242	0.0148	0	14288	GCST90274768.txt	TRUE	reported	textfile	TRUE	0.168369	2892.29	8.65064
	rs111966294	T	C	T	C	0.2101	-0.107844	0.0106	0.986588	FALSE	FALSE	FALSE	CffBSP	50576983	0.305258	0.105191	TRUE	reported	textfile	7	50644680	0.0655	0.00134	13801	GCST90274768.txt	TRUE	reported	textfile	TRUE	0.000744964	10.2874	8.65064
	rs112241773	A	T	A	T	0.1166	0.04417	0.9674	0.96616	FALSE	TRUE	FALSE	CffBSP	94204487	0.497569	0.0651167	TRUE	reported	textfile	7	93833799	0.0355	0.00102	14719	GCST90274768.txt	TRUE	reported	textfile	TRUE	0.000732393	10.7865	8.65064
	rs11252494	T	C	T	C	0.0378	0.0111706	0.5032	0.442152	FALSE	FALSE	FALSE	CffBSP	4374197	0.636737	0.0236531	TRUE	reported	textfile	10	4416389	0.0115	0.00101	14733	GCST90274768.txt	TRUE	reported	textfile	TRUE	0.000732788	10.8026	8.65064
	rs112533241	A	G	A	G	-0.099	-0.0404356	0.0418	0.988421	FALSE	FALSE	FALSE	CffBSP	168853492	0.703325	0.106176	TRUE	reported	textfile	4	169774643	0.0303	0.00109	14731	GCST90274768.txt	TRUE	reported	textfile	TRUE	0.000724166	10.674	8.65064
	rs11258851	T	C	T	C	-0.0678	-0.0205696	0.9129	0.104426	FALSE	FALSE	FALSE	CffBSP	14068537	0.592897	0.0384734	TRUE	reported	textfile	10	14110536	0.0209	0.00118	14288	GCST90274768.txt	TRUE	reported	textfile	TRUE	0.000735996	10.5222	8.65064
	rs112668526	T	G	T	G	0.1662	-0.100828	0.9726	0.00756186	FALSE	FALSE	FALSE	CffBSP	237884301	0.472687	0.140406	TRUE	reported	textfile	2	238792943	0.0513	0.0012	12437	GCST90274768.txt	TRUE	reported	textfile	TRUE	0.000843229	10.4944	8.65064
	rs112675563	A	G	A	G	0.1324	0.00425793	0.0482	0.959528	FALSE	FALSE	FALSE	CffBSP	50638723	0.943357	0.0599278	TRUE	reported	textfile	20	49255260	0.0344	0.000119	11760	GCST90274768.txt	TRUE	reported	textfile	TRUE	0.00125807	14.811	8.65064
	rs112685781	T	C	T	C	-0.0844	-0.0264123	0.0699	0.945962	FALSE	FALSE	FALSE	CffBSP	9099566	0.615136	0.0525349	TRUE	reported	textfile	18	9099564	0.0262	0.00128	14730	GCST90274768.txt	TRUE	reported	textfile	TRUE	0.000704002	10.3758	8.65064
	rs112733542	A	T	A	T	0.1415	0.0876299	0.0268	0.044499	FALSE	TRUE	FALSE	CffBSP	167194256	0.120398	0.0564224	TRUE	reported	textfile	2	168050766	0.0432	0.00105	14735	GCST90274768.txt	TRUE	reported	textfile	TRUE	0.000727577	10.7272	8.65064
	rs112781438	T	C	T	C	-0.0775	0.0160263	0.0897	0.940703	FALSE	FALSE	FALSE	CffBSP	62416371	0.748406	0.0499663	TRUE	reported	textfile	5	61712198	0.0203	0.000135	14727	GCST90274768.txt	TRUE	reported	textfile	TRUE	0.000988707	14.5731	8.65064
	rs112784469	T	C	T	C	0.0697	-0.0359407	0.082	0.927193	FALSE	FALSE	FALSE	CffBSP	13476589	0.441338	0.0466802	TRUE	reported	textfile	5	13476699	0.022	0.00153	14288	GCST90274768.txt	TRUE	reported	textfile	TRUE	0.000702011	10.036	8.65064
	rs113461649	A	G	A	G	0.1471	0.017813	0.0187	0.985521	FALSE	FALSE	FALSE	CffBSP	21208316	0.855719	0.0979667	TRUE	reported	textfile	19	21391118	0.0449	0.00105	14246	GCST90274768.txt	TRUE	reported	textfile	TRUE	0.000752857	10.7318	8.65064
	rs113499274	T	G	T	G	0.0998	0.0259599	0.0454	0.97893	FALSE	FALSE	FALSE	CffBSP	85827112	0.756244	0.0836294	TRUE	reported	textfile	10	87586869	0.0304	0.00103	14719	GCST90274768.txt	TRUE	reported	textfile	TRUE	0.000731674	10.7759	8.65064
	rs113877889	T	G	T	G	-0.2211	0.258612	0.9855	0.00730604	FALSE	FALSE	FALSE	CffBSP	238062486	0.067338	0.141364	TRUE	reported	textfile	2	238971127	0.0579	0.000134	13157	GCST90274768.txt	TRUE	reported	textfile	TRUE	0.00110709	14.5799	8.65064
	rs114078957	T	C	T	C	-0.113	-0.0145434	0.0322	0.971881	FALSE	FALSE	FALSE	CffBSP	149371662	0.838155	0.0712025	TRUE	reported	textfile	2	150228176	0.0346	0.00109	14736	GCST90274768.txt	TRUE	reported	textfile	TRUE	0.000723287	10.6646	8.65064
	rs114158313	T	C	T	C	-0.1784	-0.102495	0.0246	0.982343	FALSE	FALSE	FALSE	CffBSP	57709115	0.264257	0.0918094	TRUE	reported	textfile	1	58174787	0.0408	1.23e-05	14717	GCST90274768.txt	TRUE	reported	textfile	TRUE	0.00129744	19.1166	8.65064
	rs114175122	A	G	A	G	-0.1588	-0.140769	0.0209	0.996179	FALSE	FALSE	FALSE	CffBSP	138534660	0.447652	0.185385	TRUE	reported	textfile	2	139292230	0.0486	0.00109	12935	GCST90274768.txt	TRUE	reported	textfile	TRUE	0.000824715	10.6748	8.65064
	rs114298688	T	C	T	C	-0.0894	-0.00996215	0.0941	0.895272	FALSE	FALSE	FALSE	CffBSP	122501234	0.797955	0.0389155	TRUE	reported	textfile	5	121836929	0.0206	1.43e-05	14721	GCST90274768.txt	TRUE	reported	textfile	TRUE	0.00127776	18.8314	8.65064
	rs114442305	T	G	T	G	-0.1139	-0.0181935	0.0321	0.97973	FALSE	FALSE	FALSE	CffBSP	189235761	0.828493	0.0839824	TRUE	reported	textfile	4	190156915	0.0354	0.00129	14736	GCST90274768.txt	TRUE	reported	textfile	TRUE	0.000702031	10.351	8.65064
	rs114456644	A	G	A	G	0.1668	0.153256	0.9828	0.0177304	FALSE	FALSE	FALSE	CffBSP	58798750	0.0927598	0.0911689	TRUE	reported	textfile	5	58094577	0.0525	0.00149	14288	GCST90274768.txt	TRUE	reported	textfile	TRUE	0.000705985	10.0928	8.65064
	rs114645700	T	C	T	C	-0.1414	0.0957133	0.9777	0.00612956	FALSE	FALSE	FALSE	CffBSP	190893628	0.522276	0.149589	TRUE	reported	textfile	1	190862758	0.043	0.00101	14736	GCST90274768.txt	TRUE	reported	textfile	TRUE	0.00073327	10.8119	8.65064
	rs114801405	A	T	A	T	-0.1601	-0.239128	0.0225	0.0058057	FALSE	TRUE	FALSE	CffBSP	33776580	0.130312	0.158062	TRUE	reported	textfile	1	34242181	0.0425	0.000165	14734	GCST90274768.txt	TRUE	reported	textfile	TRUE	0.000962202	14.1888	8.65064
	rs114955277	A	G	A	G	-0.1252	-0.0323705	0.0241	0.973177	FALSE	FALSE	FALSE	CffBSP	103658702	0.666096	0.0750162	TRUE	reported	textfile	6	104106577	0.0382	0.00105	14735	GCST90274768.txt	TRUE	reported	textfile	TRUE	0.000728476	10.7405	8.65064
	rs115124117	T	C	T	C	0.0987	-0.0132457	0.0398	0.924139	FALSE	FALSE	FALSE	CffBSP	235316010	0.771132	0.0455342	TRUE	reported	textfile	2	236224654	0.0309	0.0014	14728	GCST90274768.txt	TRUE	reported	textfile	TRUE	0.000692266	10.2014	8.65064
	rs115141630	T	C	T	C	0.1407	0.108545	0.9771	0.0187342	FALSE	FALSE	FALSE	CffBSP	180766679	0.231542	0.0907266	TRUE	reported	textfile	5	180193679	0.0434	0.00119	13235	GCST90274768.txt	TRUE	reported	textfile	TRUE	0.000793487	10.5086	8.65064
	rs115168070	A	G	A	G	0.1796	0.0418339	0.0134	0.985212	FALSE	FALSE	FALSE	CffBSP	7785853	0.666756	0.0971516	TRUE	reported	textfile	4	7787580	0.0567	0.00154	13801	GCST90274768.txt	TRUE	reported	textfile	TRUE	0.000726474	10.0319	8.65064
	rs115384920	A	G	A	G	0.1129	-0.219322	0.0339	0.990974	FALSE	FALSE	FALSE	CffBSP	154721028	0.0872148	0.128238	TRUE	reported	textfile	1	154693504	0.0349	0.00122	14736	GCST90274768.txt	TRUE	reported	textfile	TRUE	0.000709658	10.4635	8.65064
	rs115412770	A	C	A	C	0.1215	-0.0859988	0.0454	0.919638	FALSE	FALSE	FALSE	CffBSP	66380857	0.0482103	0.0435326	TRUE	reported	textfile	10	68140615	0.0315	0.000115	14727	GCST90274768.txt	TRUE	reported	textfile	TRUE	0.0010092	14.8755	8.65064
	rs115524323	T	C	T	C	0.1129	-0.0273514	0.959	0.0615609	FALSE	FALSE	FALSE	CffBSP	78961070	0.574844	0.0487607	TRUE	reported	textfile	1	79426755	0.0298	0.000152	14728	GCST90274768.txt	TRUE	reported	textfile	TRUE	0.000973618	14.3515	8.65064
	rs115546269	A	G	A	G	0.2	0.0117165	0.9819	0.00419181	FALSE	FALSE	FALSE	CffBSP	5590261	0.94818	0.180274	TRUE	reported	textfile	16	5640262	0.0519	0.000116	11779	GCST90274768.txt	TRUE	reported	textfile	TRUE	0.00125913	14.8474	8.65064
	rs11589432	C	G	C	G	0.0566	-0.0372009	0.4781	0.449707	FALSE	TRUE	TRUE	CffBSP	23422359	0.117202	0.0237458	TRUE	reported	textfile	1	23748852	0.0119	1.97e-06	14287	GCST90274768.txt	TRUE	reported	textfile	FALSE	0.00158092	22.6192	8.65064
	rs115938673	T	G	T	G	0.1339	0.144652	0.9759	0.0293959	FALSE	FALSE	FALSE	CffBSP	475867	0.0369973	0.0693509	TRUE	reported	textfile	6	475867	0.0415	0.00125	14731	GCST90274768.txt	TRUE	reported	textfile	TRUE	0.000706197	10.4089	8.65064
	rs116149309	A	C	A	C	-0.1627	-0.000556944	0.9764	0.0223893	FALSE	FALSE	FALSE	CffBSP	48603499	0.994399	0.0793395	TRUE	reported	textfile	3	48640932	0.0426	0.000134	13666	GCST90274768.txt	TRUE	reported	textfile	TRUE	0.00106623	14.5845	8.65064
	rs11623261	A	C	A	C	-0.0439	-0.00481453	0.4528	0.586648	FALSE	FALSE	FALSE	CffBSP	61145142	0.840779	0.0239651	TRUE	reported	textfile	14	61611860	0.0117	0.000175	14730	GCST90274768.txt	TRUE	reported	textfile	TRUE	0.00095486	14.0766	8.65064
	rs116260440	A	G	A	G	0.1851	-0.141154	0.9784	0.0183232	FALSE	FALSE	FALSE	CffBSP	174165451	0.101093	0.0860919	TRUE	reported	textfile	1	174134589	0.0492	0.000168	14288	GCST90274768.txt	TRUE	reported	textfile	TRUE	0.000989649	14.1521	8.65064
	rs116309498	T	C	T	C	-0.1538	-0.0976765	0.0242	0.978788	FALSE	FALSE	FALSE	CffBSP	47643636	0.238896	0.0829349	TRUE	reported	textfile	7	47683234	0.04	0.000121	14734	GCST90274768.txt	TRUE	reported	textfile	TRUE	0.00100239	14.782	8.65064
	rs11633023	A	G	A	G	0.1894	0.00123852	0.9846	0.00487895	FALSE	FALSE	FALSE	CffBSP	60752476	0.994077	0.166828	TRUE	reported	textfile	15	61044675	0.0494	0.000126	14288	GCST90274768.txt	TRUE	reported	textfile	TRUE	0.00102775	14.6976	8.65064
	rs116409173	A	G	A	G	0.1523	-0.0883355	0.9819	0.00564721	FALSE	FALSE	FALSE	CffBSP	130740767	0.571473	0.156102	TRUE	reported	textfile	10	132539031	0.0478	0.00144	13382	GCST90274768.txt	TRUE	reported	textfile	TRUE	0.000758043	10.1503	8.65064
	rs116506800	T	C	T	C	0.1269	-0.18318	0.9653	0.0279082	FALSE	FALSE	FALSE	CffBSP	156517320	0.0104038	0.0714955	TRUE	reported	textfile	5	155944330	0.0327	0.000104	14736	GCST90274768.txt	TRUE	reported	textfile	TRUE	0.00102095	15.0581	8.65064
	rs116534774	T	C	T	C	0.3717	0.0749511	0.9916	0.00267927	FALSE	FALSE	FALSE	CffBSP	122438583	0.742544	0.228171	TRUE	reported	textfile	9	125200862	0.0777	1.72e-06	11139	GCST90274768.txt	TRUE	reported	textfile	TRUE	0.00205024	22.8805	8.65064
	rs11658972	T	C	T	C	-0.0457	-0.0244705	0.7257	0.204408	FALSE	FALSE	FALSE	CffBSP	41254945	0.400854	0.0291282	TRUE	reported	textfile	17	39411197	0.0139	0.00101	14288	GCST90274768.txt	TRUE	reported	textfile	TRUE	0.000755967	10.8079	8.65064
	rs11659871	T	C	T	C	-0.0387	0.00070102	0.4334	0.624479	FALSE	FALSE	FALSE	CffBSP	72669815	0.976973	0.0242874	TRUE	reported	textfile	18	70337050	0.0118	0.00104	14288	GCST90274768.txt	TRUE	reported	textfile	TRUE	0.000752246	10.7547	8.65064
	rs11669762	A	G	A	G	-0.0514	0.0397533	0.8373	0.179187	FALSE	FALSE	FALSE	CffBSP	51918551	0.19633	0.0307669	TRUE	reported	textfile	19	52421804	0.0157	0.00106	14719	GCST90274768.txt	TRUE	reported	textfile	TRUE	0.000727667	10.7169	8.65064
	rs116858527	A	G	A	G	0.1061	-0.0413386	0.0356	0.971952	FALSE	FALSE	FALSE	CffBSP	23826912	0.555031	0.0700371	TRUE	reported	textfile	19	24009714	0.0326	0.00114	13644	GCST90274768.txt	TRUE	reported	textfile	TRUE	0.000775741	10.5909	8.65064
	rs117022311	A	G	A	G	-0.1753	0.0576778	0.9768	0.0100863	FALSE	FALSE	FALSE	CffBSP	112966131	0.634224	0.121226	TRUE	reported	textfile	9	115728411	0.0468	0.00018	14288	GCST90274768.txt	TRUE	reported	textfile	TRUE	0.000981012	14.0285	8.65064
	rs117043591	A	G	A	G	-0.1481	-0.0217677	0.0317	0.951081	FALSE	FALSE	FALSE	CffBSP	35133644	0.696999	0.0559043	TRUE	reported	textfile	19	35624548	0.0381	0.000101	14288	GCST90274768.txt	TRUE	reported	textfile	TRUE	0.0010564	15.1077	8.65064
	rs117135142	T	C	T	C	0.2162	0.0354924	0.0103	0.975182	FALSE	FALSE	FALSE	CffBSP	195344014	0.637676	0.0753633	TRUE	reported	textfile	2	196208738	0.066	0.00105	13801	GCST90274768.txt	TRUE	reported	textfile	TRUE	0.000776918	10.729	8.65064
	rs117137727	T	C	T	C	-0.1782	0.104588	0.0168	0.963673	FALSE	FALSE	FALSE	CffBSP	30348280	0.104436	0.0644125	TRUE	reported	textfile	21	31720598	0.0468	0.00014	14736	GCST90274768.txt	TRUE	reported	textfile	TRUE	0.000982917	14.4966	8.65064
	rs11719357	T	C	T	C	-0.0841	-0.015565	0.9092	0.0466639	FALSE	FALSE	FALSE	CffBSP	55114655	0.776834	0.0549131	TRUE	reported	textfile	3	55148682	0.0217	0.000106	14288	GCST90274768.txt	TRUE	reported	textfile	TRUE	0.00105013	15.018	8.65064
	rs11721010	T	C	T	C	0.156	-0.0349066	0.9819	0.0164368	FALSE	FALSE	FALSE	CffBSP	16306816	0.712148	0.0946044	TRUE	reported	textfile	3	16348323	0.0484	0.00127	14736	GCST90274768.txt	TRUE	reported	textfile	TRUE	0.000704487	10.3872	8.65064
	rs117317564	T	C	T	C	0.1341	0.0839911	0.0312	0.979348	FALSE	FALSE	FALSE	CffBSP	63698252	0.308577	0.0824889	TRUE	reported	textfile	15	63990451	0.0357	0.000172	14727	GCST90274768.txt	TRUE	reported	textfile	TRUE	0.000957174	14.1079	8.65064
	rs117508525	A	G	A	G	-0.2045	0.0227687	0.0106	0.981194	FALSE	FALSE	FALSE	CffBSP	30536548	0.797721	0.0888369	TRUE	reported	textfile	19	31027455	0.0632	0.00121	14736	GCST90274768.txt	TRUE	reported	textfile	TRUE	0.00071001	10.4687	8.65064
	rs117639322	A	G	A	G	0.1377	-0.0344877	0.0226	0.965996	FALSE	FALSE	FALSE	CffBSP	27943406	0.599607	0.0656951	TRUE	reported	textfile	8	27800923	0.0421	0.00107	14734	GCST90274768.txt	TRUE	reported	textfile	TRUE	0.000725551	10.6966	8.65064
	rs11766896	T	C	T	C	-0.0569	0.0150391	0.8203	0.167518	FALSE	FALSE	FALSE	CffBSP	140499735	0.632209	0.0314219	TRUE	reported	textfile	7	140199535	0.0173	0.00101	12404	GCST90274768.txt	TRUE	reported	textfile	TRUE	0.000871349	10.8159	8.65064
	rs117683767	A	G	A	G	0.1335	-0.040705	0.0314	0.967032	FALSE	FALSE	FALSE	CffBSP	82321155	0.532673	0.0652396	TRUE	reported	textfile	16	82354760	0.0351	0.000143	14728	GCST90274768.txt	TRUE	reported	textfile	TRUE	0.000981247	14.464	8.65064
	rs117823902	A	G	A	G	0.1336	-0.0103831	0.0299	0.971846	FALSE	FALSE	FALSE	CffBSP	5491030	0.882846	0.0704595	TRUE	reported	textfile	8	5348552	0.0352	0.000147	14734	GCST90274768.txt	TRUE	reported	textfile	TRUE	0.000976748	14.4035	8.65064
	rs11783033	T	C	T	C	0.046	0.00735936	0.2409	0.686106	FALSE	FALSE	FALSE	CffBSP	108616042	0.772595	0.0254664	TRUE	reported	textfile	8	109628271	0.014	0.00102	14288	GCST90274768.txt	TRUE	reported	textfile	TRUE	0.000755023	10.7944	8.65064
	rs117878781	A	T	A	T	-0.1296	-0.0739381	0.9658	0.948742	FALSE	TRUE	FALSE	CffBSP	58620928	0.165113	0.0532665	TRUE	reported	textfile	13	59195062	0.0338	0.000126	14730	GCST90274768.txt	TRUE	reported	textfile	TRUE	0.000997104	14.7	8.65064
	rs117917071	A	C	A	C	-0.1552	-0.0353956	0.0176	0.989408	FALSE	FALSE	FALSE	CffBSP	105383300	0.756481	0.114141	TRUE	reported	textfile	8	106395528	0.0488	0.00147	14249	GCST90274768.txt	TRUE	reported	textfile	TRUE	0.000709335	10.1131	8.65064
	rs117927988	A	C	A	C	0.1536	0.0457388	0.0192	0.973743	FALSE	FALSE	FALSE	CffBSP	99862814	0.53975	0.0745916	TRUE	reported	textfile	11	99733546	0.0472	0.00114	14727	GCST90274768.txt	TRUE	reported	textfile	TRUE	0.000718575	10.5886	8.65064
	rs118006674	A	G	A	G	0.1651	-0.0773968	0.0171	0.993005	FALSE	FALSE	FALSE	CffBSP	56562658	0.568515	0.135727	TRUE	reported	textfile	12	56956442	0.0513	0.00129	13422	GCST90274768.txt	TRUE	reported	textfile	TRUE	0.000771094	10.3561	8.65064
	rs118060599	T	C	T	C	-0.1554	-0.0441549	0.9721	0.0306558	FALSE	FALSE	FALSE	CffBSP	52475618	0.524138	0.0693191	TRUE	reported	textfile	12	52869402	0.0401	0.000106	14736	GCST90274768.txt	TRUE	reported	textfile	TRUE	0.0010181	15.016	8.65064
	rs118115977	T	C	T	C	-0.1728	-0.00377529	0.0661	0.951422	FALSE	FALSE	FALSE	CffBSP	11017689	0.944361	0.0540952	TRUE	reported	textfile	19	11128365	0.0397	1.35e-05	14734	GCST90274768.txt	TRUE	reported	textfile	TRUE	0.00128419	18.9429	8.65064
	rs118189007	A	G	A	G	-0.0929	-0.0118967	0.0508	0.981847	FALSE	FALSE	FALSE	CffBSP	6064921	0.892559	0.0880806	TRUE	reported	textfile	7	6104552	0.0287	0.00121	14724	GCST90274768.txt	TRUE	reported	textfile	TRUE	0.000711104	10.4763	8.65064
	rs11828813	A	G	A	G	-0.0921	-0.0163859	0.9322	0.045351	FALSE	FALSE	FALSE	CffBSP	24203814	0.773793	0.0570112	TRUE	reported	textfile	11	24225360	0.0237	0.000102	14736	GCST90274768.txt	TRUE	reported	textfile	TRUE	0.00102376	15.0995	8.65064
	rs11845697	T	C	T	C	0.0748	0.0286686	0.1216	0.862064	FALSE	FALSE	FALSE	CffBSP	106008855	0.424461	0.0358939	TRUE	reported	textfile	14	106475018	0.0234	0.00139	11672	GCST90274768.txt	TRUE	reported	textfile	TRUE	0.000874674	10.2164	8.65064
	rs1188251	A	T	A	T	-0.0462	-0.0585751	0.3911	0.350869	FALSE	TRUE	FALSE	CffBSP	51807011	0.0181259	0.0247881	TRUE	reported	textfile	2	52034149	0.012	0.000118	14236	GCST90274768.txt	TRUE	reported	textfile	TRUE	0.00104012	14.8204	8.65064
	rs1190669	T	C	T	C	0.0499	-0.00671367	0.3663	0.632439	FALSE	FALSE	FALSE	CffBSP	10577405	0.782344	0.0243015	TRUE	reported	textfile	18	10577402	0.0129	0.00011	12404	GCST90274768.txt	TRUE	reported	textfile	TRUE	0.00120486	14.9607	8.65064
	rs11977715	A	G	A	G	0.0453	0.0196355	0.2257	0.801817	FALSE	FALSE	FALSE	CffBSP	95488391	0.508857	0.0297229	TRUE	reported	textfile	7	95117703	0.014	0.00121	14731	GCST90274768.txt	TRUE	reported	textfile	TRUE	0.000710231	10.4684	8.65064
	rs12030115	A	G	A	G	0.1217	0.00998675	0.9743	0.0308923	FALSE	FALSE	FALSE	CffBSP	238632429	0.884542	0.0687725	TRUE	reported	textfile	1	238795729	0.0371	0.00104	14731	GCST90274768.txt	TRUE	reported	textfile	TRUE	0.000729935	10.7591	8.65064
	rs12136271	A	C	A	C	-0.0967	0.0713731	0.9543	0.0294796	FALSE	FALSE	FALSE	CffBSP	234831672	0.296854	0.0684173	TRUE	reported	textfile	1	234967419	0.0299	0.00122	14736	GCST90274768.txt	TRUE	reported	textfile	TRUE	0.000709288	10.4581	8.65064
	rs12139829	T	C	T	C	-0.042	-0.0208511	0.2614	0.701046	FALSE	FALSE	FALSE	CffBSP	237574001	0.416229	0.0256476	TRUE	reported	textfile	1	237737301	0.0132	0.00146	14735	GCST90274768.txt	TRUE	reported	textfile	TRUE	0.000686598	10.1226	8.65064
	rs12147042	T	C	T	C	0.0452	0.00771247	0.2267	0.704834	FALSE	FALSE	FALSE	CffBSP	48261306	0.766699	0.0259945	TRUE	reported	textfile	14	48730509	0.0138	0.00106	14736	GCST90274768.txt	TRUE	reported	textfile	TRUE	0.000727483	10.7265	8.65064
	rs12148853	T	C	T	C	-0.0732	-0.0133765	0.0835	0.882089	FALSE	FALSE	FALSE	CffBSP	35941153	0.713321	0.0364087	TRUE	reported	textfile	15	36233354	0.0227	0.00126	13231	GCST90274768.txt	TRUE	reported	textfile	TRUE	0.000785302	10.3969	8.65064
	rs12196870	A	G	A	G	0.0854	0.05819	0.9469	0.0660337	FALSE	FALSE	FALSE	CffBSP	22754717	0.225283	0.0479878	TRUE	reported	textfile	6	22754946	0.0269	0.0015	14736	GCST90274768.txt	TRUE	reported	textfile	TRUE	0.000683494	10.0775	8.65064
	rs12208229	C	G	C	G	-0.051	-0.00555137	0.2758	0.341411	FALSE	TRUE	FALSE	CffBSP	36382647	0.824232	0.0249944	TRUE	reported	textfile	6	36350424	0.0137	0.000197	14288	GCST90274768.txt	TRUE	reported	textfile	TRUE	0.000968962	13.856	8.65064
	rs12286002	A	T	A	T	-0.0843	0.0231841	0.0759	0.0710805	FALSE	TRUE	FALSE	CffBSP	81395574	0.615671	0.046184	TRUE	reported	textfile	11	81106616	0.0219	0.000118	14736	GCST90274768.txt	TRUE	reported	textfile	TRUE	0.0010045	14.8152	8.65064
	rs12297419	T	C	T	C	0.0391	-0.0355405	0.5902	0.400529	FALSE	FALSE	FALSE	CffBSP	67863369	0.138931	0.0240174	TRUE	reported	textfile	12	68257149	0.0119	0.00102	14288	GCST90274768.txt	TRUE	reported	textfile	TRUE	0.000755023	10.7944	8.65064
	rs12323681	A	T	A	T	-0.1052	0.0591629	0.9647	0.98247	FALSE	TRUE	FALSE	CffBSP	73417286	0.511097	0.0900322	TRUE	reported	textfile	14	73883994	0.0321	0.00105	14734	GCST90274768.txt	TRUE	reported	textfile	TRUE	0.000728424	10.739	8.65064
	rs12402546	T	G	T	G	0.068	0.0487852	0.0972	0.934193	FALSE	FALSE	FALSE	CffBSP	112812582	0.30487	0.0475468	TRUE	reported	textfile	1	113355204	0.0208	0.00108	14288	GCST90274768.txt	TRUE	reported	textfile	TRUE	0.000747472	10.6864	8.65064
	rs12419620	T	G	T	G	-0.0607	0.00909296	0.8226	0.141537	FALSE	FALSE	FALSE	CffBSP	2211323	0.791447	0.0343869	TRUE	reported	textfile	11	2232553	0.0159	0.000135	14288	GCST90274768.txt	TRUE	reported	textfile	TRUE	0.00101899	14.5721	8.65064
	rs12518599	A	G	A	G	-0.1284	-0.061343	0.975	0.0255006	FALSE	FALSE	FALSE	CffBSP	164597488	0.418693	0.0758548	TRUE	reported	textfile	5	164024494	0.0392	0.00105	14732	GCST90274768.txt	TRUE	reported	textfile	TRUE	0.000727746	10.7275	8.65064
	rs12536329	A	G	A	G	0.0385	-0.0333218	0.6297	0.347936	FALSE	FALSE	FALSE	CffBSP	49844153	0.177313	0.0246997	TRUE	reported	textfile	7	49883749	0.012	0.00134	14288	GCST90274768.txt	TRUE	reported	textfile	TRUE	0.000719904	10.292	8.65064
	rs12546616	A	C	A	C	0.0484	0.0635162	0.7574	0.24076	FALSE	FALSE	FALSE	CffBSP	20607082	0.0207377	0.0274638	TRUE	reported	textfile	8	20464593	0.0152	0.00145	11780	GCST90274768.txt	TRUE	reported	textfile	TRUE	0.000859973	10.1375	8.65064
	rs12552642	T	C	T	C	-0.0661	-0.0602492	0.1221	0.916752	FALSE	FALSE	FALSE	CffBSP	73543071	0.151406	0.0419976	TRUE	reported	textfile	9	76157987	0.0177	0.000188	14731	GCST90274768.txt	TRUE	reported	textfile	TRUE	0.00094583	13.9443	8.65064
	rs12566356	A	G	A	G	0.0564	-0.0128787	0.4926	0.441706	FALSE	FALSE	FALSE	CffBSP	89067433	0.586631	0.0236861	TRUE	reported	textfile	1	89533116	0.0129	1.23e-05	11760	GCST90274768.txt	TRUE	reported	textfile	TRUE	0.0016228	19.1119	8.65064
	rs12650324	A	G	A	G	0.0735	0.0131008	0.096	0.852596	FALSE	FALSE	FALSE	CffBSP	136595163	0.696115	0.0335429	TRUE	reported	textfile	4	137516318	0.0228	0.00127	12404	GCST90274768.txt	TRUE	reported	textfile	TRUE	0.000837104	10.3905	8.65064
	rs12656717	A	G	A	G	0.0445	-0.00902274	0.4715	0.496808	FALSE	FALSE	FALSE	CffBSP	137247610	0.702082	0.0235882	TRUE	reported	textfile	5	136583299	0.0116	0.000125	14725	GCST90274768.txt	TRUE	reported	textfile	TRUE	0.000998424	14.7145	8.65064
	rs12719684	T	C	T	C	0.0601	-0.0259895	0.1659	0.821937	FALSE	FALSE	FALSE	CffBSP	155213748	0.399386	0.0308401	TRUE	reported	textfile	7	155005458	0.0161	0.000189	14288	GCST90274768.txt	TRUE	reported	textfile	TRUE	0.000974322	13.9327	8.65064
	rs1286809	A	G	A	G	0.0385	0.0188735	0.4894	0.545402	FALSE	FALSE	FALSE	CffBSP	61818832	0.425214	0.0236686	TRUE	reported	textfile	1	62284504	0.012	0.00134	14288	GCST90274768.txt	TRUE	reported	textfile	TRUE	0.000719904	10.292	8.65064
	rs12896820	A	C	A	C	-0.0438	0.0578419	0.7578	0.276269	FALSE	FALSE	FALSE	CffBSP	50811832	0.0291951	0.0265227	TRUE	reported	textfile	14	51278550	0.0136	0.00128	14727	GCST90274768.txt	TRUE	reported	textfile	TRUE	0.000703802	10.3708	8.65064
	rs12915886	A	C	A	C	-0.0961	-0.0252385	0.9334	0.0286899	FALSE	FALSE	FALSE	CffBSP	24802418	0.721094	0.0706969	TRUE	reported	textfile	15	25047565	0.0253	0.000146	12851	GCST90274768.txt	TRUE	reported	textfile	TRUE	0.00112145	14.4257	8.65064
	rs12920252	T	C	T	C	0.0404	0.0549761	0.3626	0.610321	FALSE	FALSE	FALSE	CffBSP	14036904	0.0237925	0.0243207	TRUE	reported	textfile	16	14130761	0.0124	0.00112	14288	GCST90274768.txt	TRUE	reported	textfile	TRUE	0.000742379	10.6135	8.65064
	rs13006362	T	C	T	C	0.0386	0.0290498	0.5445	0.385136	FALSE	FALSE	FALSE	CffBSP	13533312	0.233568	0.0243867	TRUE	reported	textfile	2	13673437	0.0122	0.00156	14288	GCST90274768.txt	TRUE	reported	textfile	TRUE	0.000700131	10.0091	8.65064
	rs13097436	A	G	A	G	-0.1264	0.0656481	0.9736	0.039281	FALSE	FALSE	FALSE	CffBSP	141883004	0.273465	0.0599462	TRUE	reported	textfile	3	141601846	0.0393	0.0013	14733	GCST90274768.txt	TRUE	reported	textfile	TRUE	0.000701638	10.3431	8.65064
	rs13189844	A	G	A	G	0.0645	-0.0243031	0.1427	0.827334	FALSE	FALSE	FALSE	CffBSP	76656246	0.436623	0.0312416	TRUE	reported	textfile	5	75952071	0.0171	0.000162	14288	GCST90274768.txt	TRUE	reported	textfile	TRUE	0.000994772	14.2255	8.65064
	rs13258511	T	C	T	C	0.0786	-0.0104923	0.0822	0.939746	FALSE	FALSE	FALSE	CffBSP	127757737	0.832881	0.0497244	TRUE	reported	textfile	8	128769983	0.0242	0.00116	14287	GCST90274768.txt	TRUE	reported	textfile	TRUE	0.000737824	10.5476	8.65064
	rs13354685	C	G	C	G	0.0438	-0.0264732	0.2506	0.2554	FALSE	TRUE	FALSE	CffBSP	2972317	0.328021	0.0270657	TRUE	reported	textfile	5	2972431	0.0134	0.00108	14287	GCST90274768.txt	TRUE	reported	textfile	TRUE	0.000747262	10.6826	8.65064
	rs137890649	T	TTCC	A	AAGGAGG	0.051	-0.260148	0.5351	0.000519358	TRUE	FALSE	FALSE	CffBSP	12624995	0.637899	0.552756	TRUE	reported	textfile	10	12666994	0.0135	0.000158	10894	GCST90274768.txt	TRUE	reported	textfile	FALSE	0.00130833	14.269	8.65064
	rs138046213	T	C	T	C	0.1771	-0.00679076	0.0248	0.967402	FALSE	FALSE	FALSE	CffBSP	48246641	0.920127	0.0677226	TRUE	reported	textfile	15	48538838	0.0464	0.000135	13224	GCST90274768.txt	TRUE	reported	textfile	TRUE	0.00110042	14.5658	8.65064
	rs138420842	A	T	A	T	0.1949	-0.0597598	0.016	0.00387645	FALSE	TRUE	FALSE	CffBSP	188593035	0.753002	0.189905	TRUE	reported	textfile	4	189514189	0.0509	0.000129	14247	GCST90274768.txt	TRUE	reported	textfile	TRUE	0.00102806	14.6598	8.65064
	rs138440588	A	G	A	G	0.165	0.0208663	0.983	0.00480946	FALSE	FALSE	FALSE	CffBSP	76758373	0.898198	0.163097	TRUE	reported	textfile	10	78518131	0.0507	0.00114	13422	GCST90274768.txt	TRUE	reported	textfile	TRUE	0.000788483	10.5898	8.65064
	rs138456157	A	C	A	C	-0.1867	0.0510366	0.0136	0.986695	FALSE	FALSE	FALSE	CffBSP	33938999	0.618502	0.102488	TRUE	reported	textfile	10	34227927	0.0573	0.00112	14288	GCST90274768.txt	TRUE	reported	textfile	TRUE	0.000742481	10.615	8.65064
	rs139014190	T	C	T	C	0.1693	-0.108939	0.9836	0.00942313	FALSE	FALSE	FALSE	CffBSP	150859055	0.364484	0.120129	TRUE	reported	textfile	5	150238617	0.0528	0.00134	14242	GCST90274768.txt	TRUE	reported	textfile	TRUE	0.000721376	10.2798	8.65064
	rs139224621	A	G	A	G	-0.0753	-0.0764374	0.9305	0.0601612	FALSE	FALSE	FALSE	CffBSP	18537113	0.120924	0.0492855	TRUE	reported	textfile	5	18537222	0.0229	0.00101	14716	GCST90274768.txt	TRUE	reported	textfile	TRUE	0.000734193	10.8109	8.65064
	rs139726108	T	C	T	C	0.132	-0.14182	0.0216	0.993672	FALSE	FALSE	FALSE	CffBSP	87623565	0.315251	0.141218	TRUE	reported	textfile	1	88089248	0.0404	0.00109	14735	GCST90274768.txt	TRUE	reported	textfile	TRUE	0.00072397	10.674	8.65064
	rs139789760	C	G	C	G	0.181	-0.186613	0.0276	0.0412848	FALSE	TRUE	FALSE	CffBSP	122896395	0.00286616	0.0625853	TRUE	reported	textfile	10	124655911	0.042	1.64e-05	14726	GCST90274768.txt	TRUE	reported	textfile	TRUE	0.00125958	18.5695	8.65064
	rs1399438	T	C	T	C	0.0373	0.00489288	0.4219	0.59952	FALSE	FALSE	FALSE	CffBSP	100732772	0.838519	0.0240096	TRUE	reported	textfile	12	101126550	0.0117	0.00143	14735	GCST90274768.txt	TRUE	reported	textfile	TRUE	0.000689281	10.1622	8.65064
	rs140011615	T	C	T	C	-0.1795	-0.102905	0.0189	0.983755	FALSE	FALSE	FALSE	CffBSP	191681897	0.289647	0.0971815	TRUE	reported	textfile	1	191651027	0.0468	0.000125	14247	GCST90274768.txt	TRUE	reported	textfile	TRUE	0.00103149	14.7088	8.65064
	rs140027809	C	G	C	G	0.1762	0.0627231	0.0197	0.0728962	FALSE	TRUE	FALSE	CffBSP	109207783	0.17851	0.0466219	TRUE	reported	textfile	4	110128939	0.0541	0.00113	14724	GCST90274768.txt	TRUE	reported	textfile	TRUE	0.000719911	10.6062	8.65064
	rs140183279	C	G	C	G	0.1433	0.0731841	0.023	0.00818104	FALSE	TRUE	FALSE	CffBSP	57085463	0.585739	0.134278	TRUE	reported	textfile	15	57377661	0.0444	0.00125	13801	GCST90274768.txt	TRUE	reported	textfile	TRUE	0.000754203	10.4151	8.65064
	rs140278400	T	G	T	G	-0.178	-0.12098	0.0216	0.994338	FALSE	FALSE	FALSE	CffBSP	169448256	0.456882	0.162609	TRUE	reported	textfile	3	169166044	0.0544	0.00107	13801	GCST90274768.txt	TRUE	reported	textfile	TRUE	0.000775166	10.7048	8.65064
	rs140376515	T	G	T	G	0.1929	-0.0655096	0.0277	0.96812	FALSE	FALSE	FALSE	CffBSP	8147649	0.328369	0.067024	TRUE	reported	textfile	19	8212533	0.0395	1.04e-06	14288	GCST90274768.txt	TRUE	reported	textfile	TRUE	0.00166638	23.8457	8.65064
	rs140506376	T	C	T	C	-0.1875	0.286586	0.9822	0.00930667	FALSE	FALSE	FALSE	CffBSP	141136494	0.0107815	0.1124	TRUE	reported	textfile	6	141457631	0.0504	0.000199	13944	GCST90274768.txt	TRUE	reported	textfile	TRUE	0.00099157	13.8382	8.65064
	rs140632239	T	C	T	C	0.2274	0.175913	0.9862	0.00698491	FALSE	FALSE	FALSE	CffBSP	60692604	0.213379	0.141372	TRUE	reported	textfile	16	60726508	0.0603	0.000163	13801	GCST90274768.txt	TRUE	reported	textfile	TRUE	0.00102941	14.2195	8.65064
	rs140714253	T	C	T	C	0.1433	-0.0218043	0.0276	0.98747	FALSE	FALSE	FALSE	CffBSP	36883854	0.841188	0.108818	TRUE	reported	textfile	17	35241111	0.0437	0.00104	13386	GCST90274768.txt	TRUE	reported	textfile	TRUE	0.000802657	10.7514	8.65064
	rs140854080	A	G	A	G	-0.1525	0.117316	0.0191	0.984687	FALSE	FALSE	FALSE	CffBSP	87407252	0.232558	0.0982717	TRUE	reported	textfile	4	88328404	0.0477	0.00139	14734	GCST90274768.txt	TRUE	reported	textfile	TRUE	0.000693236	10.2198	8.65064
	rs140859279	A	C	A	C	0.2054	-0.0243497	0.012	0.99469	FALSE	FALSE	FALSE	CffBSP	24645764	0.886847	0.171121	TRUE	reported	textfile	21	26018078	0.0631	0.00113	12935	GCST90274768.txt	TRUE	reported	textfile	TRUE	0.000818503	10.5944	8.65064
	rs141149432	T	C	T	C	-0.1483	-0.107055	0.0218	0.988692	FALSE	FALSE	FALSE	CffBSP	64612368	0.34681	0.113792	TRUE	reported	textfile	4	65478086	0.0453	0.00106	13378	GCST90274768.txt	TRUE	reported	textfile	TRUE	0.000800473	10.7157	8.65064
	rs141273804	A	G	A	G	-0.1462	-0.0639756	0.0255	0.953474	FALSE	FALSE	FALSE	CffBSP	42752017	0.258434	0.0566106	TRUE	reported	textfile	10	43247465	0.0388	0.000165	14728	GCST90274768.txt	TRUE	reported	textfile	TRUE	0.000963095	14.1962	8.65064
	rs141328478	T	C	T	C	0.164	0.118053	0.9803	0.0422035	FALSE	FALSE	FALSE	CffBSP	38772419	0.0498839	0.060202	TRUE	reported	textfile	18	36352383	0.0438	0.000181	14726	GCST90274768.txt	TRUE	reported	textfile	TRUE	0.000951133	14.0178	8.65064
	rs141413241	A	C	A	C	0.1487	-0.0358943	0.9618	0.0163071	FALSE	FALSE	FALSE	CffBSP	62861123	0.712915	0.0975537	TRUE	reported	textfile	7	62321501	0.0467	0.00145	9843	GCST90274768.txt	TRUE	reported	textfile	TRUE	0.001029	10.1368	8.65064
	rs141674572	A	G	A	G	-0.0695	0.0527159	0.098	0.927423	FALSE	FALSE	FALSE	CffBSP	5461754	0.242939	0.0451462	TRUE	reported	textfile	20	5442400	0.0212	0.00104	12836	GCST90274768.txt	TRUE	reported	textfile	TRUE	0.000836575	10.7456	8.65064
	rs141873668	A	G	A	G	-0.2252	-0.09726	0.0152	0.990267	FALSE	FALSE	FALSE	CffBSP	78048597	0.420017	0.120611	TRUE	reported	textfile	17	76044678	0.0707	0.00145	8884	GCST90274768.txt	TRUE	reported	textfile	TRUE	0.00114076	10.1438	8.65064
	rs142138753	A	G	A	G	0.0945	0.00224143	0.0522	0.942225	FALSE	FALSE	FALSE	CffBSP	86526764	0.96507	0.0511827	TRUE	reported	textfile	8	87538992	0.0288	0.00103	14288	GCST90274768.txt	TRUE	reported	textfile	TRUE	0.000752974	10.7651	8.65064
	rs142218892	A	G	A	G	0.1215	-0.0385063	0.0261	0.976226	FALSE	FALSE	FALSE	CffBSP	58359996	0.623481	0.0784366	TRUE	reported	textfile	15	58652195	0.0383	0.00151	14721	GCST90274768.txt	TRUE	reported	textfile	TRUE	0.000683158	10.0623	8.65064
	rs142285575	A	C	A	C	0.1265	0.127257	0.0254	0.948632	FALSE	FALSE	FALSE	CffBSP	66098612	0.0190853	0.0542938	TRUE	reported	textfile	18	63765848	0.0389	0.00115	14736	GCST90274768.txt	TRUE	reported	textfile	TRUE	0.000717118	10.5736	8.65064
	rs142436448	T	C	T	C	-0.2094	-0.0750345	0.0106	0.995818	FALSE	FALSE	FALSE	CffBSP	104976935	0.693811	0.190594	TRUE	reported	textfile	13	105629286	0.0657	0.00144	12935	GCST90274768.txt	TRUE	reported	textfile	TRUE	0.000784721	10.1568	8.65064
	rs1424884	T	G	T	G	0.0768	-0.016976	0.0716	0.869681	FALSE	FALSE	FALSE	CffBSP	71687587	0.62926	0.0351638	TRUE	reported	textfile	8	72599822	0.0235	0.00108	14729	GCST90274768.txt	TRUE	reported	textfile	TRUE	0.000724601	10.6789	8.65064
	rs143132666	A	C	A	C	-0.1934	-0.0164763	0.0225	0.974851	FALSE	FALSE	FALSE	CffBSP	160792288	0.825387	0.0746811	TRUE	reported	textfile	1	160762078	0.0406	1.9e-06	14734	GCST90274768.txt	TRUE	reported	textfile	TRUE	0.0015377	22.6883	8.65064
	rs143586648	A	C	A	C	-0.2281	-0.11413	0.0144	0.992021	FALSE	FALSE	FALSE	CffBSP	1778755	0.398598	0.135204	TRUE	reported	textfile	6	1778989	0.0609	0.00018	14288	GCST90274768.txt	TRUE	reported	textfile	TRUE	0.000980886	14.0267	8.65064
	rs143829443	A	G	A	G	0.1945	-0.232595	0.0148	0.991619	FALSE	FALSE	FALSE	CffBSP	224849476	0.0711279	0.128886	TRUE	reported	textfile	1	225037178	0.0592	0.00102	14288	GCST90274768.txt	TRUE	reported	textfile	TRUE	0.000754912	10.7928	8.65064
	rs143951536	T	C	T	C	-0.1435	0.0354056	0.0328	0.963152	FALSE	FALSE	FALSE	CffBSP	92568483	0.583821	0.0646309	TRUE	reported	textfile	1	93034040	0.0369	0.000101	14288	GCST90274768.txt	TRUE	reported	textfile	TRUE	0.00105735	15.1213	8.65064
	rs144392496	T	C	T	C	-0.2187	-0.00769642	0.982	0.00362426	FALSE	FALSE	FALSE	CffBSP	36050615	0.969065	0.198456	TRUE	reported	textfile	14	36519821	0.0574	0.000139	11926	GCST90274768.txt	TRUE	reported	textfile	TRUE	0.00121577	14.5145	8.65064
	rs144968254	A	C	A	C	-0.1859	-0.0954878	0.9805	0.0109169	FALSE	FALSE	FALSE	CffBSP	95670812	0.398519	0.113101	TRUE	reported	textfile	2	96336560	0.0479	0.000104	13185	GCST90274768.txt	TRUE	reported	textfile	TRUE	0.00114107	15.0599	8.65064
	rs144971791	A	G	A	G	0.1671	0.00716293	0.9748	0.00450028	FALSE	FALSE	FALSE	CffBSP	49708110	0.968514	0.181466	TRUE	reported	textfile	15	50000307	0.0439	0.000141	14231	GCST90274768.txt	TRUE	reported	textfile	TRUE	0.00101706	14.4865	8.65064
	rs145048572	A	G	A	G	-0.2287	-0.000559044	0.9818	0.0201422	FALSE	FALSE	FALSE	CffBSP	46624849	0.994829	0.0862593	TRUE	reported	textfile	8	47536471	0.0699	0.00107	11384	GCST90274768.txt	TRUE	reported	textfile	TRUE	0.000939453	10.7029	8.65064
	rs145087584	C	G	C	G	0.1574	0.0413625	0.9826	0.984209	FALSE	TRUE	FALSE	CffBSP	23718566	0.668698	0.0966557	TRUE	reported	textfile	3	23760057	0.0482	0.00109	14734	GCST90274768.txt	TRUE	reported	textfile	TRUE	0.000723237	10.6624	8.65064
	rs145114298	A	G	A	G	0.1524	0.0590772	0.0195	0.981074	FALSE	FALSE	FALSE	CffBSP	84226356	0.512668	0.090237	TRUE	reported	textfile	3	84275507	0.0465	0.00105	14244	GCST90274768.txt	TRUE	reported	textfile	TRUE	0.000753537	10.74	8.65064
	rs145261619	A	G	A	G	-0.1723	0.214619	0.0225	0.987519	FALSE	FALSE	FALSE	CffBSP	104834975	0.0411718	0.105113	TRUE	reported	textfile	9	107597256	0.0526	0.00105	14288	GCST90274768.txt	TRUE	reported	textfile	TRUE	0.000750415	10.7285	8.65064
	rs145466173	A	G	A	G	-0.237	-0.584678	0.0291	0.999071	FALSE	FALSE	FALSE	CffBSP	41783457	0.166154	0.422252	TRUE	reported	textfile	12	42177259	0.0542	1.23e-05	12935	GCST90274768.txt	TRUE	reported	textfile	TRUE	0.00147601	19.1175	8.65064
	rs145698044	A	C	A	C	0.2187	-0.0174505	0.9758	0.0143302	FALSE	FALSE	FALSE	CffBSP	8063622	0.85972	0.0987404	TRUE	reported	textfile	19	8128506	0.0417	1.57e-07	14718	GCST90274768.txt	TRUE	reported	textfile	TRUE	0.00186537	27.5021	8.65064
	rs145863662	T	C	T	C	-0.1678	0.113929	0.025	0.995231	FALSE	FALSE	FALSE	CffBSP	162922611	0.495611	0.167195	TRUE	reported	textfile	5	162349617	0.0436	0.000119	14243	GCST90274768.txt	TRUE	reported	textfile	TRUE	0.00103886	14.8098	8.65064
	rs146178857	T	C	T	C	0.2256	0.053488	0.0211	0.948921	FALSE	FALSE	FALSE	CffBSP	54719532	0.328273	0.0547137	TRUE	reported	textfile	5	54015360	0.0605	0.000192	13306	GCST90274768.txt	TRUE	reported	textfile	TRUE	0.00104392	13.9028	8.65064
	rs146339997	T	C	T	C	-0.2074	-0.131114	0.022	0.994004	FALSE	FALSE	FALSE	CffBSP	743469	0.399103	0.155491	TRUE	reported	textfile	16	793469	0.0546	0.000146	10853	GCST90274768.txt	TRUE	reported	textfile	TRUE	0.00132772	14.4262	8.65064
	rs146563209	G	GT	G	GT	0.1091	-0.0319434	0.9362	0.0493291	FALSE	FALSE	FALSE	CffBSP	173888930	0.555515	0.0541859	TRUE	reported	textfile	4	174810081	0.0283	0.000116	10894	GCST90274768.txt	TRUE	reported	textfile	TRUE	0.00136238	14.8593	8.65064
	rs146589345	A	G	A	G	-0.1054	-0.0509588	0.0406	0.937953	FALSE	FALSE	FALSE	CffBSP	60280339	0.303387	0.0495131	TRUE	reported	textfile	16	60314243	0.0329	0.00136	12829	GCST90274768.txt	TRUE	reported	textfile	TRUE	0.000799373	10.2618	8.65064
	rs1468319	A	G	A	G	-0.0465	-0.0378607	0.7667	0.239721	FALSE	FALSE	FALSE	CffBSP	25462788	0.169471	0.027557	TRUE	reported	textfile	15	25707935	0.0143	0.00115	13228	GCST90274768.txt	TRUE	reported	textfile	TRUE	0.000798716	10.5723	8.65064
	rs146900886	C	G	C	G	0.1494	-0.0301235	0.0252	0.043525	FALSE	TRUE	FALSE	CffBSP	151309070	0.602709	0.0578732	TRUE	reported	textfile	5	150688631	0.0455	0.00103	14288	GCST90274768.txt	TRUE	reported	textfile	TRUE	0.000754014	10.78	8.65064
	rs147638061	T	C	T	C	0.1486	0.0259471	0.0222	0.978841	FALSE	FALSE	FALSE	CffBSP	20059099	0.748862	0.0810496	TRUE	reported	textfile	17	19962412	0.0458	0.00118	12792	GCST90274768.txt	TRUE	reported	textfile	TRUE	0.000822263	10.5254	8.65064
	rs148137611	T	C	T	C	0.1649	0.116095	0.0279	0.972066	FALSE	FALSE	FALSE	CffBSP	181280981	0.111032	0.072852	TRUE	reported	textfile	5	180707982	0.0378	1.29e-05	14288	GCST90274768.txt	TRUE	reported	textfile	TRUE	0.00133017	19.0282	8.65064
	rs148650414	T	G	T	G	0.1181	0.041419	0.9652	0.0106183	FALSE	FALSE	FALSE	CffBSP	9797722	0.712046	0.112213	TRUE	reported	textfile	1	9857780	0.0369	0.00137	13227	GCST90274768.txt	TRUE	reported	textfile	TRUE	0.000773837	10.2419	8.65064
	rs148653896	T	C	T	C	0.181	0.0436674	0.0274	0.982697	FALSE	FALSE	FALSE	CffBSP	239750379	0.63021	0.090703	TRUE	reported	textfile	2	240672073	0.0479	0.000158	14729	GCST90274768.txt	TRUE	reported	textfile	TRUE	0.000968483	14.2767	8.65064
	rs148701299	A	C	A	C	-0.1239	-0.127985	0.9719	0.01325	FALSE	FALSE	FALSE	CffBSP	43847997	0.209906	0.102076	TRUE	reported	textfile	12	44241800	0.039	0.00149	14244	GCST90274768.txt	TRUE	reported	textfile	TRUE	0.000708066	10.0914	8.65064
	rs1489103	T	G	T	G	0.0405	0.0306896	0.3364	0.694122	FALSE	FALSE	FALSE	CffBSP	75975484	0.229851	0.0255588	TRUE	reported	textfile	3	76024635	0.0124	0.00109	14288	GCST90274768.txt	TRUE	reported	textfile	TRUE	0.000746055	10.6661	8.65064
	rs148986395	A	G	A	G	-0.1812	0.0424506	0.0177	0.974478	FALSE	FALSE	FALSE	CffBSP	230917588	0.572938	0.0753033	TRUE	reported	textfile	2	231782303	0.0555	0.0011	14288	GCST90274768.txt	TRUE	reported	textfile	TRUE	0.000745478	10.6579	8.65064
	rs149143921	A	G	A	G	0.1487	0.0203033	0.0215	0.980498	FALSE	FALSE	FALSE	CffBSP	2882972	0.811886	0.0853102	TRUE	reported	textfile	16	2932973	0.0455	0.00108	14288	GCST90274768.txt	TRUE	reported	textfile	TRUE	0.00074697	10.6792	8.65064
	rs149189790	T	C	T	C	0.1304	0.182859	0.9729	0.0167842	FALSE	FALSE	FALSE	CffBSP	118390334	0.0472792	0.0921765	TRUE	reported	textfile	12	118828139	0.0397	0.00102	14720	GCST90274768.txt	TRUE	reported	textfile	TRUE	0.0007324	10.7874	8.65064
	rs1492350	T	C	T	C	0.046	0.0352425	0.2077	0.799464	FALSE	FALSE	FALSE	CffBSP	88550113	0.232448	0.0295145	TRUE	reported	textfile	12	88943890	0.0143	0.0013	14733	GCST90274768.txt	TRUE	reported	textfile	TRUE	0.000701855	10.3463	8.65064
	rs149280507	A	C	A	C	0.2055	0.00918754	0.0217	0.983057	FALSE	FALSE	FALSE	CffBSP	9038318	0.927689	0.101237	TRUE	reported	textfile	4	9040044	0.0637	0.00126	11241	GCST90274768.txt	TRUE	reported	textfile	TRUE	0.000924992	10.4056	8.65064
	rs149967840	A	G	A	G	-0.2881	0.137755	0.0226	0.993563	FALSE	FALSE	FALSE	CffBSP	149819088	0.414779	0.168918	TRUE	reported	textfile	1	149790642	0.0655	1.09e-05	9838	GCST90274768.txt	TRUE	reported	textfile	TRUE	0.00196265	19.3426	8.65064
	rs150034132	A	C	A	C	0.1009	0.140544	0.963	0.0264252	FALSE	FALSE	FALSE	CffBSP	99781467	0.0610942	0.0750443	TRUE	reported	textfile	15	100321672	0.0317	0.00146	14734	GCST90274768.txt	TRUE	reported	textfile	TRUE	0.000687139	10.1299	8.65064
	rs150234732	C	G	C	G	-0.1739	0.0137934	0.0199	0.0162671	FALSE	TRUE	FALSE	CffBSP	101289186	0.88623	0.0964059	TRUE	reported	textfile	7	100932467	0.0529	0.00101	12404	GCST90274768.txt	TRUE	reported	textfile	TRUE	0.000870458	10.8048	8.65064
	rs150281830	A	G	A	G	0.139	0.120148	0.0278	0.946644	FALSE	FALSE	FALSE	CffBSP	104739168	0.0219735	0.0524477	TRUE	reported	textfile	6	105187043	0.0424	0.00104	14239	GCST90274768.txt	TRUE	reported	textfile	TRUE	0.000754207	10.7458	8.65064
	rs150438951	T	G	T	G	0.5429	0.0791133	0.0041	0.962852	FALSE	FALSE	FALSE	CffBSP	29989623	0.215632	0.0638924	TRUE	reported	textfile	21	31361941	0.1424	0.000138	8372	GCST90274768.txt	TRUE	reported	textfile	TRUE	0.00173315	14.5317	8.65064
	rs150575563	A	G	A	G	0.1293	-0.065619	0.031	0.988158	FALSE	FALSE	FALSE	CffBSP	109861053	0.560608	0.112759	TRUE	reported	textfile	6	110182256	0.0404	0.00137	13801	GCST90274768.txt	TRUE	reported	textfile	TRUE	0.000741654	10.2417	8.65064
	rs150738510	A	G	A	G	0.2519	0.408042	0.0106	0.999065	FALSE	FALSE	FALSE	CffBSP	40479904	0.301265	0.39473	TRUE	reported	textfile	21	41851831	0.0775	0.00115	11626	GCST90274768.txt	TRUE	reported	textfile	TRUE	0.000907879	10.5628	8.65064
	rs150882412	A	C	A	C	0.2032	-0.0643094	0.9829	0.0275337	FALSE	FALSE	FALSE	CffBSP	125360458	0.400588	0.0765068	TRUE	reported	textfile	6	125681604	0.0622	0.00109	12580	GCST90274768.txt	TRUE	reported	textfile	TRUE	0.000847652	10.6708	8.65064
	rs150888356	T	C	T	C	0.1881	0.0610074	0.9839	0.0108883	FALSE	FALSE	FALSE	CffBSP	82105975	0.587722	0.112531	TRUE	reported	textfile	11	81817017	0.0594	0.00154	12635	GCST90274768.txt	TRUE	reported	textfile	TRUE	0.000793021	10.0262	8.65064
	rs151132457	A	G	A	G	-0.2336	0.136981	0.0142	0.997964	FALSE	FALSE	FALSE	CffBSP	114809212	0.601586	0.262354	TRUE	reported	textfile	10	116568971	0.0614	0.000142	13422	GCST90274768.txt	TRUE	reported	textfile	TRUE	0.00107727	14.4725	8.65064
	rs151200972	T	C	T	C	-0.1045	-0.0161754	0.9625	0.0520268	FALSE	FALSE	FALSE	CffBSP	126402260	0.760039	0.0529595	TRUE	reported	textfile	4	127323415	0.0318	0.00102	14724	GCST90274768.txt	TRUE	reported	textfile	TRUE	0.000732882	10.7974	8.65064
	rs151330252	T	C	T	C	0.1332	-0.0990146	0.0252	0.979386	FALSE	FALSE	FALSE	CffBSP	93470162	0.226664	0.0818981	TRUE	reported	textfile	8	94482390	0.0416	0.00137	14288	GCST90274768.txt	TRUE	reported	textfile	TRUE	0.000717032	10.2509	8.65064
	rs1533642	T	C	T	C	-0.0548	0.10958	0.8695	0.103039	FALSE	FALSE	FALSE	CffBSP	109141069	0.00354519	0.0375784	TRUE	reported	textfile	9	111903349	0.0172	0.00144	14718	GCST90274768.txt	TRUE	reported	textfile	TRUE	0.000689217	10.1495	8.65064
	rs16931434	A	G	A	G	-0.2486	0.0390502	0.0103	0.996513	FALSE	FALSE	FALSE	CffBSP	129746092	0.839639	0.192979	TRUE	reported	textfile	9	132508371	0.065	0.000131	13801	GCST90274768.txt	TRUE	reported	textfile	TRUE	0.00105878	14.6256	8.65064
	rs16972507	A	C	A	C	-0.0512	-0.0366598	0.1675	0.804204	FALSE	FALSE	FALSE	CffBSP	42033916	0.218394	0.0297851	TRUE	reported	textfile	15	42326114	0.016	0.00137	14732	GCST90274768.txt	TRUE	reported	textfile	TRUE	0.000694603	10.2386	8.65064
	rs17000271	T	C	T	C	0.1509	0.0188822	0.968	0.0140644	FALSE	FALSE	FALSE	CffBSP	49050569	0.845495	0.0968969	TRUE	reported	textfile	22	49446381	0.0353	1.91e-05	14727	GCST90274768.txt	TRUE	reported	textfile	TRUE	0.0012393	18.2713	8.65064
	rs17066932	T	C	T	C	-0.0823	-0.0452709	0.9392	0.0465293	FALSE	FALSE	FALSE	CffBSP	106377446	0.424661	0.0567047	TRUE	reported	textfile	6	106825321	0.0251	0.00104	14719	GCST90274768.txt	TRUE	reported	textfile	TRUE	0.000729889	10.7496	8.65064
	rs17111481	A	G	A	G	0.212	0.0790833	0.0138	0.959559	FALSE	FALSE	FALSE	CffBSP	81101334	0.190394	0.0603959	TRUE	reported	textfile	14	81567678	0.0547	0.000106	14734	GCST90274768.txt	TRUE	reported	textfile	TRUE	0.00101844	15.0189	8.65064
	rs171850	C	G	C	G	0.0404	0.0137838	0.4701	0.45531	FALSE	TRUE	TRUE	CffBSP	1887868	0.560968	0.0237078	TRUE	reported	textfile	5	1887982	0.0123	0.00102	14288	GCST90274768.txt	TRUE	reported	textfile	FALSE	0.00075449	10.7868	8.65064
	rs17230633	T	C	T	C	0.0767	-0.0748319	0.0932	0.906773	FALSE	FALSE	FALSE	CffBSP	92391753	0.0653206	0.0406021	TRUE	reported	textfile	6	93101471	0.0201	0.000136	14727	GCST90274768.txt	TRUE	reported	textfile	TRUE	0.000987768	14.5593	8.65064
	rs1731274	A	G	A	G	-0.0541	0.00394211	0.5474	0.486733	FALSE	FALSE	FALSE	CffBSP	23908806	0.867116	0.0235599	TRUE	reported	textfile	8	23766319	0.0124	1.28e-05	12834	GCST90274768.txt	TRUE	reported	textfile	TRUE	0.00148097	19.032	8.65064
	rs17319264	A	G	A	G	0.1861	0.0637746	0.0169	0.986046	FALSE	FALSE	FALSE	CffBSP	7273387	0.520677	0.0992906	TRUE	reported	textfile	7	7313018	0.0498	0.000186	14288	GCST90274768.txt	TRUE	reported	textfile	TRUE	0.000976424	13.9628	8.65064
	rs1744886	A	T	A	T	0.0453	0.00622591	0.4956	0.494331	FALSE	TRUE	TRUE	CffBSP	21670861	0.793186	0.0237471	TRUE	reported	textfile	6	21671092	0.0118	0.000124	14288	GCST90274768.txt	TRUE	reported	textfile	FALSE	0.00103042	14.7357	8.65064
	rs17664213	A	C	A	C	0.0378	0.00213655	0.5519	0.44452	FALSE	FALSE	FALSE	CffBSP	51191899	0.928204	0.0237119	TRUE	reported	textfile	18	48718269	0.0115	0.00101	14725	GCST90274768.txt	TRUE	reported	textfile	TRUE	0.000733186	10.8026	8.65064
	rs17683663	T	C	T	C	-0.1198	-0.0634256	0.0745	0.910509	FALSE	FALSE	FALSE	CffBSP	42223904	0.128176	0.0416908	TRUE	reported	textfile	8	42081422	0.0226	1.15e-07	14730	GCST90274768.txt	TRUE	reported	textfile	TRUE	0.001904	28.0956	8.65064
	rs17715196	T	C	T	C	-0.0585	0.0368556	0.881	0.125131	FALSE	FALSE	FALSE	CffBSP	49949196	0.305449	0.035963	TRUE	reported	textfile	18	47475566	0.0179	0.00108	14732	GCST90274768.txt	TRUE	reported	textfile	TRUE	0.000724485	10.6794	8.65064
	rs17791782	A	T	A	T	-0.0926	-0.0967879	0.9139	0.912187	FALSE	TRUE	FALSE	CffBSP	17585424	0.019463	0.0414236	TRUE	reported	textfile	20	17566069	0.0211	1.14e-05	14288	GCST90274768.txt	TRUE	reported	textfile	TRUE	0.00134617	19.2573	8.65064
	rs181488847	T	C	T	C	0.1637	0.0909788	0.0264	0.973544	FALSE	FALSE	FALSE	CffBSP	148018	0.230148	0.075817	TRUE	reported	textfile	9	148018	0.0424	0.000113	12828	GCST90274768.txt	TRUE	reported	textfile	TRUE	0.00116065	14.9038	8.65064
	rs182279159	A	G	A	G	0.2429	0.395075	0.9851	0.00386106	FALSE	FALSE	FALSE	CffBSP	44695974	0.0319022	0.18413	TRUE	reported	textfile	2	44923113	0.0628	0.00011	11439	GCST90274768.txt	TRUE	reported	textfile	TRUE	0.00130611	14.9575	8.65064
	rs183792997	A	G	A	G	0.1175	0.00578193	0.9658	0.0312211	FALSE	FALSE	FALSE	CffBSP	42312013	0.930697	0.0664833	TRUE	reported	textfile	20	40940653	0.0358	0.00103	14077	GCST90274768.txt	TRUE	reported	textfile	TRUE	0.000764658	10.7708	8.65064
	rs1838054	A	G	A	G	-0.0554	-0.0186665	0.1397	0.823483	FALSE	FALSE	FALSE	CffBSP	19854638	0.548383	0.0311012	TRUE	reported	textfile	11	19876184	0.0169	0.00105	14726	GCST90274768.txt	TRUE	reported	textfile	TRUE	0.000729196	10.7445	8.65064
	rs1839101	A	G	A	G	0.0665	0.0459218	0.0942	0.894581	FALSE	FALSE	FALSE	CffBSP	121797129	0.22942	0.0382092	TRUE	reported	textfile	11	121667837	0.0207	0.00132	14288	GCST90274768.txt	TRUE	reported	textfile	TRUE	0.000721801	10.3191	8.65064
	rs1863061	T	C	T	C	0.0376	0.0267063	0.4515	0.505921	FALSE	FALSE	FALSE	CffBSP	86285784	0.256759	0.0235488	TRUE	reported	textfile	2	86512907	0.0115	0.00108	14718	GCST90274768.txt	TRUE	reported	textfile	TRUE	0.000725798	10.6886	8.65064
	rs186332507	T	C	T	C	-0.2495	-0.190608	0.9891	0.00505028	FALSE	FALSE	FALSE	CffBSP	65953078	0.231036	0.159146	TRUE	reported	textfile	6	66662971	0.0646	0.000112	12935	GCST90274768.txt	TRUE	reported	textfile	TRUE	0.00115188	14.9145	8.65064
	rs186813880	A	G	A	G	0.0973	-0.0607361	0.0467	0.972768	FALSE	FALSE	FALSE	CffBSP	36013836	0.410457	0.0737905	TRUE	reported	textfile	13	36587973	0.0297	0.00105	12851	GCST90274768.txt	TRUE	reported	textfile	TRUE	0.000834475	10.7311	8.65064
	rs186978901	T	C	T	C	0.3801	0.12226	0.0088	0.989313	FALSE	FALSE	FALSE	CffBSP	35847680	0.291676	0.115946	TRUE	reported	textfile	22	36243727	0.0987	0.000118	10850	GCST90274768.txt	TRUE	reported	textfile	TRUE	0.00136502	14.828	8.65064
	rs187475610	T	C	T	C	0.2047	0.0954544	0.013	0.985826	FALSE	FALSE	FALSE	CffBSP	4680579	0.353903	0.102966	TRUE	reported	textfile	16	4730580	0.0625	0.00106	12737	GCST90274768.txt	TRUE	reported	textfile	TRUE	0.000841478	10.7253	8.65064
	rs1889912	A	G	A	G	-0.0604	-0.0326868	0.2243	0.702528	FALSE	FALSE	FALSE	CffBSP	33814359	0.203592	0.0257097	TRUE	reported	textfile	17	32141378	0.0139	1.39e-05	14736	GCST90274768.txt	TRUE	reported	textfile	TRUE	0.0012797	18.8793	8.65064
	rs191768800	A	C	A	C	-0.1428	-0.109075	0.9745	0.0176428	FALSE	FALSE	FALSE	CffBSP	7770347	0.230117	0.0908916	TRUE	reported	textfile	19	7835233	0.0444	0.0013	14288	GCST90274768.txt	TRUE	reported	textfile	TRUE	0.000723444	10.3426	8.65064
	rs192005064	T	G	T	G	0.2191	-0.160968	0.9823	0.00390433	FALSE	FALSE	FALSE	CffBSP	46852111	0.406946	0.194106	TRUE	reported	textfile	1	47317783	0.0564	0.000102	13157	GCST90274768.txt	TRUE	reported	textfile	TRUE	0.0011457	15.089	8.65064
	rs192683350	C	G	C	G	-0.2305	-0.013672	0.0134	0.00673978	FALSE	TRUE	FALSE	CffBSP	119408681	0.923187	0.141796	TRUE	reported	textfile	4	120329836	0.0614	0.000174	10854	GCST90274768.txt	TRUE	reported	textfile	TRUE	0.00129674	14.0905	8.65064
	rs192700960	A	C	A	C	-0.4029	-0.0286487	0.0102	0.973294	FALSE	FALSE	FALSE	CffBSP	125623939	0.713853	0.0781286	TRUE	reported	textfile	2	126381516	0.0936	1.67e-05	9861	GCST90274768.txt	TRUE	reported	textfile	TRUE	0.00187545	18.5249	8.65064
	rs193153530	A	C	A	C	-0.2542	-0.194112	0.0109	0.994994	FALSE	FALSE	FALSE	CffBSP	151509998	0.231076	0.162085	TRUE	reported	textfile	3	151227786	0.0683	0.000198	11573	GCST90274768.txt	TRUE	reported	textfile	TRUE	0.00119549	13.8495	8.65064
	rs1934625	A	G	A	G	-0.0492	0.0259247	0.5263	0.482903	FALSE	FALSE	FALSE	CffBSP	210729573	0.273935	0.0236962	TRUE	reported	textfile	1	210902915	0.0115	1.88e-05	14721	GCST90274768.txt	TRUE	reported	textfile	TRUE	0.00124182	18.301	8.65064
	rs1945403	A	C	A	C	0.0473	0.024079	0.3605	0.656344	FALSE	FALSE	FALSE	CffBSP	21365918	0.331783	0.0248102	TRUE	reported	textfile	11	21387464	0.0123	0.00012	14287	GCST90274768.txt	TRUE	reported	textfile	TRUE	0.001034	14.786	8.65064
	rs1950084	A	G	A	G	-0.0593	-0.00141773	0.1215	0.871987	FALSE	FALSE	FALSE	CffBSP	189690355	0.967828	0.0351506	TRUE	reported	textfile	3	189408144	0.0183	0.00119	14288	GCST90274768.txt	TRUE	reported	textfile	TRUE	0.000734373	10.499	8.65064
	rs1966989	C	G	C	G	-0.038	-0.0371569	0.537	0.581808	FALSE	TRUE	TRUE	CffBSP	98210378	0.120737	0.0239461	TRUE	reported	textfile	12	98604156	0.0116	0.00105	14707	GCST90274768.txt	TRUE	reported	textfile	FALSE	0.000729139	10.7298	8.65064
	rs197555	T	C	T	C	-0.0691	-0.130917	0.8167	0.002172	FALSE	FALSE	FALSE	CffBSP	17988395	0.73386	0.385055	TRUE	reported	textfile	21	19360712	0.0213	0.00118	10894	GCST90274768.txt	TRUE	reported	textfile	TRUE	0.00096514	10.5225	8.65064
	rs1991213	A	G	A	G	-0.04	-0.00639532	0.329	0.738224	FALSE	FALSE	FALSE	CffBSP	98590193	0.811874	0.02687	TRUE	reported	textfile	15	99133422	0.0125	0.00137	14288	GCST90274768.txt	TRUE	reported	textfile	TRUE	0.000716172	10.2386	8.65064
	rs201473582	T	TC	T	TC	-0.1771	0.0853746	0.9785	0.00786702	FALSE	FALSE	FALSE	CffBSP	75799448	0.524588	0.134175	TRUE	reported	textfile	13	76373584	0.0456	0.000103	11342	GCST90274768.txt	TRUE	reported	textfile	TRUE	0.00132813	15.081	8.65064
	rs202062739	A	T	A	T	0.2687	-0.123539	0.0334	0.0214995	FALSE	TRUE	FALSE	CffBSP	84208575	0.127588	0.081079	TRUE	reported	textfile	9	86823490	0.0625	1.71e-05	9257	GCST90274768.txt	TRUE	reported	textfile	TRUE	0.00199269	18.4791	8.65064
	rs202505	C	G	C	G	-0.0506	0.0213645	0.4618	0.395001	FALSE	TRUE	TRUE	CffBSP	1719125	0.373331	0.0239983	TRUE	reported	textfile	20	1699771	0.0116	1.29e-05	14730	GCST90274768.txt	TRUE	reported	textfile	FALSE	0.00129009	19.0251	8.65064
	rs2029095	T	G	T	G	-0.1365	0.0572252	0.0303	0.969321	FALSE	FALSE	FALSE	CffBSP	27261216	0.404118	0.0685915	TRUE	reported	textfile	12	27414149	0.0352	0.000105	14288	GCST90274768.txt	TRUE	reported	textfile	TRUE	0.00105136	15.0355	8.65064
	rs2030268	T	C	T	C	0.0417	0.00864333	0.7205	0.287925	FALSE	FALSE	FALSE	CffBSP	3314789	0.740682	0.0261168	TRUE	reported	textfile	3	3356473	0.0129	0.00123	14730	GCST90274768.txt	TRUE	reported	textfile	TRUE	0.000708895	10.448	8.65064
	rs2032909	T	C	T	C	0.042	0.0162394	0.3066	0.652895	FALSE	FALSE	FALSE	CffBSP	65869807	0.513723	0.0248669	TRUE	reported	textfile	16	65903710	0.013	0.00123	14287	GCST90274768.txt	TRUE	reported	textfile	TRUE	0.000730052	10.4364	8.65064
	rs2071839	T	C	T	C	0.0725	0.0455087	0.9219	0.0817456	FALSE	FALSE	FALSE	CffBSP	37486521	0.291625	0.043154	TRUE	reported	textfile	22	37882559	0.0221	0.00104	14721	GCST90274768.txt	TRUE	reported	textfile	TRUE	0.000730528	10.7605	8.65064
	rs2077446	A	G	A	G	-0.0896	-0.0352718	0.0637	0.909313	FALSE	FALSE	FALSE	CffBSP	42897678	0.389696	0.0410058	TRUE	reported	textfile	22	43293684	0.0273	0.00103	11337	GCST90274768.txt	TRUE	reported	textfile	TRUE	0.000949249	10.77	8.65064
	rs2078037	A	C	A	C	0.0662	0.0458451	0.7599	0.2845	FALSE	FALSE	FALSE	CffBSP	2519970	0.0801051	0.026196	TRUE	reported	textfile	18	2519969	0.0136	1.13e-06	14712	GCST90274768.txt	TRUE	reported	textfile	TRUE	0.00160793	23.6908	8.65064
	rs2086889	T	C	T	C	0.0557	0.0345135	0.8636	0.0903099	FALSE	FALSE	FALSE	CffBSP	114589769	0.401725	0.0411588	TRUE	reported	textfile	1	115132390	0.0175	0.00146	14288	GCST90274768.txt	TRUE	reported	textfile	TRUE	0.000708525	10.1292	8.65064
	rs2107613	T	C	T	C	0.0461	-0.0414519	0.7779	0.197283	FALSE	FALSE	FALSE	CffBSP	779262	0.159506	0.0294667	TRUE	reported	textfile	12	888428	0.0141	0.00108	14288	GCST90274768.txt	TRUE	reported	textfile	TRUE	0.000747597	10.6882	8.65064
	rs2124084	C	G	C	G	0.0952	0.0943	0.9564	0.961946	FALSE	TRUE	FALSE	CffBSP	181235433	0.126816	0.061764	TRUE	reported	textfile	4	182156586	0.0295	0.00125	14288	GCST90274768.txt	TRUE	reported	textfile	TRUE	0.000728353	10.4128	8.65064
	rs2150688	T	C	T	C	0.0599	0.0298957	0.1441	0.7735	FALSE	FALSE	FALSE	CffBSP	29534583	0.287446	0.0281042	TRUE	reported	textfile	13	30108720	0.0187	0.00136	11774	GCST90274768.txt	TRUE	reported	textfile	TRUE	0.000870699	10.2588	8.65064
	rs2216275	A	G	A	G	0.0591	-0.0393049	0.3859	0.560298	FALSE	FALSE	FALSE	CffBSP	50723363	0.0972232	0.0236996	TRUE	reported	textfile	11	50682534	0.0135	1.2e-05	11340	GCST90274768.txt	TRUE	reported	textfile	TRUE	0.00168718	19.1616	8.65064
	rs2220283	A	G	A	G	-0.0386	-0.000995634	0.4257	0.601258	FALSE	FALSE	FALSE	CffBSP	10918119	0.967105	0.0241429	TRUE	reported	textfile	11	10939666	0.0118	0.00107	14732	GCST90274768.txt	TRUE	reported	textfile	TRUE	0.000725828	10.6992	8.65064
	rs2281363	A	G	A	G	0.0542	-0.0429011	0.8591	0.10538	FALSE	FALSE	FALSE	CffBSP	32163767	0.267493	0.0386896	TRUE	reported	textfile	20	30751570	0.0165	0.00102	14736	GCST90274768.txt	TRUE	reported	textfile	TRUE	0.0007317	10.7888	8.65064
	rs2319781	T	C	T	C	-0.0448	0.0734796	0.7797	0.314803	FALSE	FALSE	FALSE	CffBSP	64279901	0.00351852	0.0251782	TRUE	reported	textfile	16	64313805	0.0141	0.00149	14288	GCST90274768.txt	TRUE	reported	textfile	TRUE	0.000706057	10.0939	8.65064
	rs2375048	T	C	T	C	-0.0385	-0.0241746	0.4735	0.484505	FALSE	FALSE	FALSE	CffBSP	95995365	0.306153	0.0236235	TRUE	reported	textfile	7	95624677	0.0118	0.0011	14288	GCST90274768.txt	TRUE	reported	textfile	TRUE	0.000744496	10.6438	8.65064
	rs2399334	T	C	T	C	-0.0475	0.0175981	0.6057	0.382474	FALSE	FALSE	FALSE	CffBSP	110582178	0.468913	0.0242983	TRUE	reported	textfile	3	110301025	0.0125	0.000145	13234	GCST90274768.txt	TRUE	reported	textfile	TRUE	0.00108994	14.4378	8.65064
	rs2424474	A	G	A	G	0.0388	-0.0107397	0.5658	0.474209	FALSE	FALSE	FALSE	CffBSP	22785217	0.650136	0.0236781	TRUE	reported	textfile	20	22765855	0.0119	0.00111	14288	GCST90274768.txt	TRUE	reported	textfile	TRUE	0.00074349	10.6294	8.65064
	rs245041	T	C	T	C	-0.0639	0.00198628	0.8002	0.202	FALSE	FALSE	FALSE	CffBSP	72640578	0.946396	0.029543	TRUE	reported	textfile	5	71936405	0.0149	1.8e-05	14715	GCST90274768.txt	TRUE	reported	textfile	TRUE	0.00124832	18.3895	8.65064
	rs2526571	A	G	A	G	-0.0378	-0.0136299	0.632	0.332813	FALSE	FALSE	FALSE	CffBSP	25568805	0.585744	0.0250084	TRUE	reported	textfile	15	25813952	0.0119	0.00149	14736	GCST90274768.txt	TRUE	reported	textfile	TRUE	0.000684247	10.0886	8.65064
	rs2556378	T	G	T	G	-0.0585	-0.03008	0.1809	0.780631	FALSE	FALSE	FALSE	CffBSP	60535367	0.289007	0.0283692	TRUE	reported	textfile	2	60762502	0.0153	0.000132	14730	GCST90274768.txt	TRUE	reported	textfile	TRUE	0.000991506	14.6174	8.65064
	rs2686423	A	G	A	G	-0.0938	-0.0206246	0.0647	0.9474	FALSE	FALSE	FALSE	CffBSP	183477920	0.691853	0.0520376	TRUE	reported	textfile	3	183195708	0.0242	0.000106	14723	GCST90274768.txt	TRUE	reported	textfile	TRUE	0.00101938	15.0216	8.65064
	rs2721859	T	C	T	C	-0.0484	-0.0186071	0.4984	0.582544	FALSE	FALSE	FALSE	CffBSP	12378486	0.436594	0.0239179	TRUE	reported	textfile	17	12281803	0.0129	0.000175	12404	GCST90274768.txt	TRUE	reported	textfile	TRUE	0.00113359	14.0748	8.65064
	rs278115	T	C	T	C	-0.0487	0.0500985	0.1827	0.815536	FALSE	FALSE	FALSE	CffBSP	119741604	0.0972322	0.0302084	TRUE	reported	textfile	12	120179409	0.0148	0.001	14716	GCST90274768.txt	TRUE	reported	textfile	TRUE	0.000735234	10.8262	8.65064
	rs2816181	T	C	T	C	0.0383	-0.0179122	0.5945	0.366685	FALSE	FALSE	FALSE	CffBSP	179282962	0.463917	0.0244565	TRUE	reported	textfile	1	179252097	0.0119	0.00129	14288	GCST90274768.txt	TRUE	reported	textfile	TRUE	0.000724465	10.3572	8.65064
	rs28407601	A	G	A	G	-0.0513	-0.0164651	0.7186	0.267902	FALSE	FALSE	FALSE	CffBSP	121618188	0.541336	0.0269569	TRUE	reported	textfile	3	121337035	0.0132	0.000102	14288	GCST90274768.txt	TRUE	reported	textfile	TRUE	0.00105598	15.1017	8.65064
	rs28442250	A	G	A	G	0.113	0.0829852	0.9579	0.0458515	FALSE	FALSE	FALSE	CffBSP	88536959	0.153641	0.0581623	TRUE	reported	textfile	4	89458110	0.03	0.000165	14727	GCST90274768.txt	TRUE	reported	textfile	TRUE	0.000962458	14.1859	8.65064
	rs28632076	A	G	A	G	0.1512	-0.135165	0.0178	0.983911	FALSE	FALSE	FALSE	CffBSP	11091509	0.149811	0.0938519	TRUE	reported	textfile	9	11091509	0.0467	0.00121	14733	GCST90274768.txt	TRUE	reported	textfile	TRUE	0.000711	10.4812	8.65064
	rs28635631	A	G	A	G	0.1576	0.120407	0.0183	0.992924	FALSE	FALSE	FALSE	CffBSP	77971125	0.396326	0.141956	TRUE	reported	textfile	15	78263467	0.0487	0.00121	12850	GCST90274768.txt	TRUE	reported	textfile	TRUE	0.000814325	10.471	8.65064
	rs28649003	A	G	A	G	-0.0688	-0.0465671	0.8351	0.164596	FALSE	FALSE	FALSE	CffBSP	81928837	0.142899	0.0317846	TRUE	reported	textfile	15	82221178	0.0156	1.03e-05	14734	GCST90274768.txt	TRUE	reported	textfile	TRUE	0.00131836	19.4477	8.65064
	rs2869314	T	G	T	G	0.1302	-0.0223135	0.0507	0.954142	FALSE	FALSE	FALSE	CffBSP	47949473	0.693482	0.0566139	TRUE	reported	textfile	20	46578217	0.0343	0.000147	14720	GCST90274768.txt	TRUE	reported	textfile	TRUE	0.000977915	14.407	8.65064
	rs2909638	T	C	T	C	0.0374	-0.0329202	0.5987	0.479317	FALSE	FALSE	FALSE	CffBSP	64447840	0.162026	0.0235432	TRUE	reported	textfile	18	62115075	0.0117	0.00139	14735	GCST90274768.txt	TRUE	reported	textfile	TRUE	0.000692979	10.2167	8.65064
	rs2928377	A	T	A	T	0.0727	-0.0886345	0.0857	0.101584	FALSE	TRUE	FALSE	CffBSP	144424398	0.0254888	0.0396768	TRUE	reported	textfile	8	145649781	0.0224	0.00117	13224	GCST90274768.txt	TRUE	reported	textfile	TRUE	0.00079591	10.5319	8.65064
	rs297111	T	C	T	C	-0.137	0.18003	0.9275	0.018183	FALSE	FALSE	FALSE	CffBSP	55789912	0.0603434	0.0958482	TRUE	reported	textfile	11	55557388	0.0353	0.000104	11340	GCST90274768.txt	TRUE	reported	textfile	TRUE	0.00132648	15.0597	8.65064
	rs3093848	T	C	T	C	-0.198	0.00116851	0.979	0.016467	FALSE	FALSE	FALSE	CffBSP	87395962	0.989523	0.0889852	TRUE	reported	textfile	5	86691779	0.0452	1.18e-05	13801	GCST90274768.txt	TRUE	reported	textfile	TRUE	0.00138848	19.1863	8.65064
	rs3212013	T	C	T	C	-0.1201	0.0360141	0.0451	0.954392	FALSE	FALSE	FALSE	CffBSP	80666738	0.525134	0.0566747	TRUE	reported	textfile	7	80296054	0.0311	0.000113	14288	GCST90274768.txt	TRUE	reported	textfile	TRUE	0.00104266	14.9109	8.65064
	rs34150859	T	C	T	C	-0.1107	-0.0372115	0.0344	0.951293	FALSE	FALSE	FALSE	CffBSP	44952601	0.496783	0.0547583	TRUE	reported	textfile	10	45448049	0.0347	0.00142	14736	GCST90274768.txt	TRUE	reported	textfile	TRUE	0.000690171	10.176	8.65064
	rs34155131	C	G	C	G	0.1042	0.0393842	0.9582	0.927753	FALSE	TRUE	FALSE	CffBSP	54484874	0.389538	0.0457714	TRUE	reported	textfile	4	55351041	0.0319	0.00109	14288	GCST90274768.txt	TRUE	reported	textfile	TRUE	0.000746205	10.6683	8.65064
	rs34165580	A	G	A	G	-0.0385	-0.0213503	0.5685	0.513172	FALSE	FALSE	FALSE	CffBSP	148232217	0.365273	0.023582	TRUE	reported	textfile	4	149153369	0.012	0.00134	14288	GCST90274768.txt	TRUE	reported	textfile	TRUE	0.000719904	10.292	8.65064
	rs34292762	T	C	T	C	-0.1078	-0.0673667	0.966	0.0349552	FALSE	FALSE	FALSE	CffBSP	67234398	0.289202	0.063561	TRUE	reported	textfile	2	67461530	0.033	0.00109	14736	GCST90274768.txt	TRUE	reported	textfile	TRUE	0.000723628	10.6697	8.65064
	rs34316487	T	C	T	C	0.1254	0.00128091	0.9734	0.0366213	FALSE	FALSE	FALSE	CffBSP	15167757	0.983423	0.0616489	TRUE	reported	textfile	17	15071074	0.0386	0.00116	14730	GCST90274768.txt	TRUE	reported	textfile	TRUE	0.00071599	10.5526	8.65064
	rs34535368	A	G	A	G	-0.1101	-0.0713164	0.0732	0.881079	FALSE	FALSE	FALSE	CffBSP	6815225	0.0501568	0.0364115	TRUE	reported	textfile	8	6672746	0.029	0.000147	11337	GCST90274768.txt	TRUE	reported	textfile	TRUE	0.00126978	14.4113	8.65064
	rs34536806	T	G	T	G	0.0805	-0.0470305	0.9023	0.0710146	FALSE	FALSE	FALSE	CffBSP	95541323	0.30763	0.046099	TRUE	reported	textfile	11	95274487	0.0208	0.000109	14288	GCST90274768.txt	TRUE	reported	textfile	TRUE	0.00104722	14.9763	8.65064
	rs34586427	T	C	T	C	-0.038	-0.0111262	0.5533	0.531883	FALSE	FALSE	FALSE	CffBSP	74864020	0.637432	0.0236079	TRUE	reported	textfile	12	75257800	0.0116	0.00105	14729	GCST90274768.txt	TRUE	reported	textfile	TRUE	0.000728051	10.7298	8.65064
	rs34592165	A	G	A	G	-0.1061	-0.036354	0.036	0.962333	FALSE	FALSE	FALSE	CffBSP	23368731	0.560994	0.0625321	TRUE	reported	textfile	10	23657660	0.0331	0.00135	14728	GCST90274768.txt	TRUE	reported	textfile	TRUE	0.000697153	10.2734	8.65064
	rs34610052	A	G	A	G	0.0716	0.00197763	0.0847	0.942802	FALSE	FALSE	FALSE	CffBSP	155516952	0.969298	0.0513812	TRUE	reported	textfile	7	155309647	0.0222	0.00126	14288	GCST90274768.txt	TRUE	reported	textfile	TRUE	0.000727499	10.4006	8.65064
	rs34646577	C	G	C	G	-0.0495	0.00881918	0.24	0.219655	FALSE	TRUE	FALSE	CffBSP	137616301	0.757277	0.0285357	TRUE	reported	textfile	8	138628544	0.0151	0.00104	12403	GCST90274768.txt	TRUE	reported	textfile	TRUE	0.000865673	10.7445	8.65064
	rs34659614	A	C	A	C	-0.1374	0.0226641	0.9789	0.0280925	FALSE	FALSE	FALSE	CffBSP	102057492	0.747433	0.0703797	TRUE	reported	textfile	5	101393196	0.042	0.00107	14736	GCST90274768.txt	TRUE	reported	textfile	TRUE	0.000725738	10.7008	8.65064
	rs34834688	T	C	T	C	-0.0585	0.00077039	0.1836	0.797654	FALSE	FALSE	FALSE	CffBSP	25896315	0.979014	0.0292871	TRUE	reported	textfile	16	25907636	0.0151	0.000107	14734	GCST90274768.txt	TRUE	reported	textfile	TRUE	0.00101764	15.0072	8.65064
	rs35316467	G	GTA	G	GTA	0.0427	0.00467337	0.6103	0.419203	FALSE	FALSE	FALSE	CffBSP	29767812	0.844954	0.0238973	TRUE	reported	textfile	12	29920745	0.0134	0.00144	11324	GCST90274768.txt	TRUE	reported	textfile	TRUE	0.000895895	10.1524	8.65064
	rs35320832	A	AT	A	AT	0.0619	0.0652316	0.8469	0.194624	FALSE	FALSE	FALSE	CffBSP	42012568	0.0294144	0.0299518	TRUE	reported	textfile	13	42586704	0.0191	0.00119	10894	GCST90274768.txt	TRUE	reported	textfile	TRUE	0.000963183	10.5011	8.65064
	rs35363564	A	G	A	G	0.1003	0.066921	0.0378	0.953922	FALSE	FALSE	FALSE	CffBSP	35191404	0.248168	0.0579497	TRUE	reported	textfile	5	35191506	0.0306	0.00105	14727	GCST90274768.txt	TRUE	reported	textfile	TRUE	0.000729001	10.7424	8.65064
	rs354728	T	C	T	C	-0.0473	0.0134009	0.328	0.572089	FALSE	FALSE	FALSE	CffBSP	143187206	0.573366	0.0237984	TRUE	reported	textfile	2	143944775	0.0123	0.00012	14735	GCST90274768.txt	TRUE	reported	textfile	TRUE	0.0010026	14.7861	8.65064
	rs35560358	A	ATG	T	TACAC	-0.056	0.0960975	0.4527	0.000415613	TRUE	FALSE	FALSE	CffBSP	116029332	0.880271	0.637988	TRUE	reported	textfile	8	117041557	0.0144	0.000101	10894	GCST90274768.txt	TRUE	reported	textfile	FALSE	0.00138631	15.1207	8.65064
	rs35844692	A	G	A	G	-0.0815	0.0201394	0.1317	0.934924	FALSE	FALSE	FALSE	CffBSP	14753515	0.672916	0.0477067	TRUE	reported	textfile	4	14755139	0.0213	0.00013	14713	GCST90274768.txt	TRUE	reported	textfile	TRUE	0.000994083	14.6385	8.65064
	rs36007625	A	T	A	T	-0.0779	0.0241646	0.0993	0.106699	FALSE	TRUE	FALSE	CffBSP	94111285	0.528477	0.0383362	TRUE	reported	textfile	14	94577631	0.0209	0.000194	14288	GCST90274768.txt	TRUE	reported	textfile	TRUE	0.000971379	13.8906	8.65064
	rs36139467	A	G	A	G	-0.0375	0.0236824	0.3927	0.605402	FALSE	FALSE	FALSE	CffBSP	106313556	0.325714	0.0240973	TRUE	reported	textfile	12	106707334	0.0118	0.00148	14734	GCST90274768.txt	TRUE	reported	textfile	TRUE	0.000684984	10.0981	8.65064
	rs36142550	A	G	A	G	0.0901	-0.0324283	0.9372	0.0397264	FALSE	FALSE	FALSE	CffBSP	1480798	0.591197	0.0603764	TRUE	reported	textfile	4	1482523	0.0276	0.0011	13651	GCST90274768.txt	TRUE	reported	textfile	TRUE	0.00078006	10.6554	8.65064
	rs367742528	A	G	A	G	0.1233	0.215391	0.0295	0.992541	FALSE	FALSE	FALSE	CffBSP	43509871	0.106096	0.133287	TRUE	reported	textfile	6	43477609	0.0375	0.00101	14091	GCST90274768.txt	TRUE	reported	textfile	TRUE	0.000766635	10.8094	8.65064
	rs369244786	C	G	C	G	0.1353	0.0400409	0.9606	0.969816	FALSE	TRUE	FALSE	CffBSP	60380606	0.551066	0.0671644	TRUE	reported	textfile	6	57352441	0.0348	0.000101	11144	GCST90274768.txt	TRUE	reported	textfile	TRUE	0.00135459	15.1133	8.65064
	rs3767445	T	C	T	C	0.0516	-0.0253215	0.7562	0.160201	FALSE	FALSE	FALSE	CffBSP	167730906	0.426858	0.0318678	TRUE	reported	textfile	1	167700143	0.0136	0.000148	14288	GCST90274768.txt	TRUE	reported	textfile	TRUE	0.0010065	14.3933	8.65064
	rs3767872	A	G	A	G	-0.0647	-0.0095798	0.1015	0.884796	FALSE	FALSE	FALSE	CffBSP	212442255	0.792821	0.0364738	TRUE	reported	textfile	1	212615597	0.0197	0.00102	14727	GCST90274768.txt	TRUE	reported	textfile	TRUE	0.000731887	10.7849	8.65064
	rs3796096	A	G	A	G	0.1652	0.182285	0.0157	0.990813	FALSE	FALSE	FALSE	CffBSP	198187876	0.139407	0.123332	TRUE	reported	textfile	2	199052600	0.0504	0.00105	13866	GCST90274768.txt	TRUE	reported	textfile	TRUE	0.000774233	10.7423	8.65064
	rs3873463	C	G	C	G	0.0446	-0.022135	0.4785	0.432154	FALSE	TRUE	TRUE	CffBSP	72864066	0.353634	0.0238636	TRUE	reported	textfile	7	72334630	0.0136	0.00104	11340	GCST90274768.txt	TRUE	reported	textfile	FALSE	0.000947474	10.7526	8.65064
	rs389065	T	C	T	C	-0.0964	0.00886099	0.0443	0.964778	FALSE	FALSE	FALSE	CffBSP	28019184	0.89122	0.0647918	TRUE	reported	textfile	12	28172117	0.0298	0.00122	14721	GCST90274768.txt	TRUE	reported	textfile	TRUE	0.000710355	10.4632	8.65064
	rs391317	A	T	A	T	-0.05	0.008073	0.2462	0.228388	FALSE	TRUE	FALSE	CffBSP	36990987	0.773286	0.0280235	TRUE	reported	textfile	11	37012537	0.0134	0.00019	14729	GCST90274768.txt	TRUE	reported	textfile	TRUE	0.00094438	13.921	8.65064
	rs3914813	A	T	A	T	-0.0387	-0.0722802	0.3395	0.282299	FALSE	TRUE	FALSE	CffBSP	139848759	0.00586435	0.0262334	TRUE	reported	textfile	2	140606328	0.0122	0.00151	14732	GCST90274768.txt	TRUE	reported	textfile	TRUE	0.000682565	10.061	8.65064
	rs41490444	T	C	T	C	-0.1115	0.0632124	0.0462	0.952953	FALSE	FALSE	FALSE	CffBSP	62816578	0.257511	0.0558269	TRUE	reported	textfile	14	63283296	0.0287	0.000102	14288	GCST90274768.txt	TRUE	reported	textfile	TRUE	0.00105525	15.0912	8.65064
	rs422742	A	T	A	T	0.0482	0.0355301	0.2503	0.287602	FALSE	TRUE	FALSE	CffBSP	16873846	0.17062	0.0259303	TRUE	reported	textfile	21	18246166	0.0147	0.00104	12403	GCST90274768.txt	TRUE	reported	textfile	TRUE	0.000866077	10.7495	8.65064
	rs4340802	T	C	T	C	0.1795	0.0639903	0.0196	0.972266	FALSE	FALSE	FALSE	CffBSP	36588105	0.376246	0.072319	TRUE	reported	textfile	4	36589727	0.0467	0.000121	14288	GCST90274768.txt	TRUE	reported	textfile	TRUE	0.00103294	14.7718	8.65064
	rs4424056	T	G	T	G	-0.0467	-0.00600632	0.2026	0.777623	FALSE	FALSE	FALSE	CffBSP	91135689	0.831829	0.0282841	TRUE	reported	textfile	6	91845407	0.0144	0.00118	14733	GCST90274768.txt	TRUE	reported	textfile	TRUE	0.000713358	10.516	8.65064
	rs443121	A	T	A	T	-0.0467	0.019264	0.216	0.220502	FALSE	TRUE	FALSE	CffBSP	268599	0.49598	0.0282949	TRUE	reported	textfile	20	249240	0.0143	0.00109	14288	GCST90274768.txt	TRUE	reported	textfile	TRUE	0.000745875	10.6635	8.65064
	rs4491526	T	C	T	C	0.2077	0.00115921	0.9852	0.00995229	FALSE	FALSE	FALSE	CffBSP	47532874	0.992281	0.119824	TRUE	reported	textfile	16	47566785	0.0542	0.000127	14288	GCST90274768.txt	TRUE	reported	textfile	TRUE	0.00102673	14.683	8.65064
	rs4534384	T	C	T	C	-0.0401	0.00556881	0.353	0.670853	FALSE	FALSE	FALSE	CffBSP	188732311	0.823617	0.024984	TRUE	reported	textfile	1	188701442	0.0123	0.00111	14288	GCST90274768.txt	TRUE	reported	textfile	TRUE	0.000743334	10.6272	8.65064
	rs4661292	A	G	A	G	0.0466	-0.0288565	0.7918	0.221105	FALSE	FALSE	FALSE	CffBSP	14588651	0.312508	0.0285715	TRUE	reported	textfile	1	14915147	0.0142	0.00103	14736	GCST90274768.txt	TRUE	reported	textfile	TRUE	0.000730295	10.768	8.65064
	rs4669261	T	G	T	G	0.0567	0.00896175	0.8122	0.116254	FALSE	FALSE	FALSE	CffBSP	8384411	0.806596	0.0366055	TRUE	reported	textfile	2	8524541	0.0148	0.000128	14717	GCST90274768.txt	TRUE	reported	textfile	TRUE	0.000996301	14.6752	8.65064
	rs4681799	A	G	A	G	0.0579	0.00563619	0.7465	0.251433	FALSE	FALSE	FALSE	CffBSP	58124045	0.836249	0.0272683	TRUE	reported	textfile	3	58109772	0.0149	0.000102	11784	GCST90274768.txt	TRUE	reported	textfile	TRUE	0.00127978	15.0977	8.65064
	rs4736462	A	G	A	G	-0.0786	0.0629744	0.9055	0.068064	FALSE	FALSE	FALSE	CffBSP	130949214	0.178568	0.0468149	TRUE	reported	textfile	8	131961460	0.0207	0.000146	14288	GCST90274768.txt	TRUE	reported	textfile	TRUE	0.00100808	14.416	8.65064
	rs4744951	A	G	A	G	0.0586	-0.00791196	0.8803	0.1613	FALSE	FALSE	FALSE	CffBSP	69891428	0.807069	0.0323983	TRUE	reported	textfile	9	72506344	0.018	0.00113	14287	GCST90274768.txt	TRUE	reported	textfile	TRUE	0.000741288	10.5972	8.65064
	rs476382	T	C	T	C	-0.0615	0.0856174	0.1522	0.832064	FALSE	FALSE	FALSE	CffBSP	22525019	0.00724453	0.0318827	TRUE	reported	textfile	18	20104982	0.0163	0.000161	14727	GCST90274768.txt	TRUE	reported	textfile	TRUE	0.000965698	14.2336	8.65064
	rs476569	T	C	T	C	0.0445	0.0224173	0.4893	0.59985	FALSE	FALSE	FALSE	CffBSP	39342206	0.354759	0.0242245	TRUE	reported	textfile	5	39342308	0.0118	0.000162	14733	GCST90274768.txt	TRUE	reported	textfile	TRUE	0.000964375	14.2199	8.65064
	rs4776570	A	G	A	G	0.0951	0.129596	0.0494	0.936304	FALSE	FALSE	FALSE	CffBSP	71689803	0.00801973	0.0488814	TRUE	reported	textfile	15	71982142	0.0295	0.00127	14736	GCST90274768.txt	TRUE	reported	textfile	TRUE	0.000704744	10.391	8.65064
	rs4813750	T	C	T	C	0.0469	0.015674	0.407	0.52298	FALSE	FALSE	FALSE	CffBSP	617783	0.507135	0.0236302	TRUE	reported	textfile	20	598427	0.0121	0.000106	14288	GCST90274768.txt	TRUE	reported	textfile	TRUE	0.00105038	15.0215	8.65064
	rs484625	C	G	C	G	0.0741	-0.0114367	0.072	0.064555	FALSE	TRUE	FALSE	CffBSP	71682173	0.808085	0.0470846	TRUE	reported	textfile	7	71147158	0.0233	0.00147	14288	GCST90274768.txt	TRUE	reported	textfile	TRUE	0.000707369	10.1126	8.65064
	rs485073	A	G	A	G	0.3098	0.0397822	0.5286	0.416894	FALSE	FALSE	FALSE	CffBSP	48703998	0.0954641	0.023861	TRUE	reported	textfile	19	49207255	0.0113	1.77e-165	14735	GCST90274768.txt	TRUE	reported	textfile	TRUE	0.0485343	751.531	8.65064
	rs4859206	A	G	A	G	-0.0411	-0.0117533	0.3893	0.707794	FALSE	FALSE	FALSE	CffBSP	183566621	0.653553	0.0261864	TRUE	reported	textfile	3	183284409	0.0125	0.00101	14288	GCST90274768.txt	TRUE	reported	textfile	TRUE	0.000756073	10.8094	8.65064
	rs4942035	C	G	C	G	-0.073	-0.0415729	0.0756	0.041048	FALSE	TRUE	FALSE	CffBSP	41346237	0.479018	0.0587285	TRUE	reported	textfile	13	41920373	0.0222	0.00101	14723	GCST90274768.txt	TRUE	reported	textfile	TRUE	0.000733879	10.8114	8.65064
	rs506274	A	T	A	T	-0.0377	0.0343276	0.497	0.451363	FALSE	TRUE	TRUE	CffBSP	129611128	0.146605	0.0236477	TRUE	reported	textfile	10	131409392	0.0115	0.00104	14730	GCST90274768.txt	TRUE	reported	textfile	FALSE	0.000729067	10.7455	8.65064
	rs55662383	T	C	T	C	-0.1452	0.125646	0.024	0.988708	FALSE	FALSE	FALSE	CffBSP	48970482	0.261935	0.112001	TRUE	reported	textfile	20	47587019	0.0449	0.00122	12356	GCST90274768.txt	TRUE	reported	textfile	TRUE	0.000845659	10.4561	8.65064
	rs55715900	A	G	A	G	0.1713	0.000460914	0.0269	0.975472	FALSE	FALSE	FALSE	CffBSP	7934236	0.995209	0.0767559	TRUE	reported	textfile	19	7999121	0.0399	1.76e-05	13672	GCST90274768.txt	TRUE	reported	textfile	TRUE	0.00134633	18.4292	8.65064
	rs55765475	A	C	A	C	0.1329	0.0940729	0.0416	0.982431	FALSE	FALSE	FALSE	CffBSP	73986200	0.304374	0.091591	TRUE	reported	textfile	4	74851917	0.0405	0.00103	11760	GCST90274768.txt	TRUE	reported	textfile	TRUE	0.000914819	10.7663	8.65064
	rs55866170	T	C	T	C	0.0924	0.0157784	0.0657	0.880241	FALSE	FALSE	FALSE	CffBSP	191193112	0.6614	0.0360254	TRUE	reported	textfile	3	190910901	0.0239	0.000111	14735	GCST90274768.txt	TRUE	reported	textfile	TRUE	0.00101335	14.9448	8.65064
	rs55997245	A	G	A	G	0.1184	-0.0181412	0.9695	0.0263961	FALSE	FALSE	FALSE	CffBSP	103436158	0.808249	0.0747517	TRUE	reported	textfile	2	104052616	0.0363	0.00111	14736	GCST90274768.txt	TRUE	reported	textfile	TRUE	0.000721435	10.6373	8.65064
	rs56069834	A	C	A	C	-0.0379	0.0108104	0.5484	0.513956	FALSE	FALSE	FALSE	CffBSP	43141620	0.646087	0.0235416	TRUE	reported	textfile	7	43181219	0.0116	0.00109	14725	GCST90274768.txt	TRUE	reported	textfile	TRUE	0.000724423	10.6734	8.65064
	rs56080315	T	C	T	C	-0.0977	0.00678854	0.0576	0.976417	FALSE	FALSE	FALSE	CffBSP	54904833	0.931685	0.07919	TRUE	reported	textfile	13	55478968	0.0258	0.000153	14724	GCST90274768.txt	TRUE	reported	textfile	TRUE	0.000972974	14.3381	8.65064
	rs56315603	T	C	T	C	0.1501	0.0979841	0.981	0.003992	FALSE	FALSE	FALSE	CffBSP	69322971	0.59187	0.182762	TRUE	reported	textfile	5	68618798	0.0474	0.00154	12935	GCST90274768.txt	TRUE	reported	textfile	TRUE	0.000774643	10.0262	8.65064
	rs56380709	T	C	T	C	-0.0687	-0.0756786	0.9113	0.055675	FALSE	FALSE	FALSE	CffBSP	18887861	0.14405	0.0518036	TRUE	reported	textfile	2	19069127	0.021	0.00107	14718	GCST90274768.txt	TRUE	reported	textfile	TRUE	0.000726625	10.7008	8.65064
	rs56402551	T	C	T	C	-0.2353	-0.197882	0.9726	0.0110176	FALSE	FALSE	FALSE	CffBSP	41499767	0.093942	0.118142	TRUE	reported	textfile	6	41467505	0.0728	0.00123	11428	GCST90274768.txt	TRUE	reported	textfile	TRUE	0.000913301	10.4449	8.65064
	rs57108522	C	G	C	G	0.0582	0.00778477	0.1239	0.139085	FALSE	TRUE	FALSE	CffBSP	6579040	0.820199	0.0342504	TRUE	reported	textfile	5	6579153	0.0178	0.00108	14288	GCST90274768.txt	TRUE	reported	textfile	TRUE	0.00074767	10.6892	8.65064
	rs57481919	T	C	T	C	-0.2961	0.0206426	0.9921	0.00221647	FALSE	FALSE	FALSE	CffBSP	28250060	0.931656	0.240697	TRUE	reported	textfile	6	28217838	0.0767	0.000113	12291	GCST90274768.txt	TRUE	reported	textfile	TRUE	0.00121108	14.901	8.65064
	rs57608529	A	G	A	G	-0.0821	-0.0315688	0.0562	0.930486	FALSE	FALSE	FALSE	CffBSP	133274351	0.501756	0.0469964	TRUE	reported	textfile	11	133144246	0.0256	0.00134	14724	GCST90274768.txt	TRUE	reported	textfile	TRUE	0.000698035	10.2837	8.65064
	rs5769590	C	G	C	G	-0.0951	0.0577872	0.9362	0.936144	FALSE	TRUE	FALSE	CffBSP	49359525	0.235141	0.0486744	TRUE	reported	textfile	22	49755477	0.0245	0.000104	14726	GCST90274768.txt	TRUE	reported	textfile	TRUE	0.00102212	15.065	8.65064
	rs58386137	T	C	T	C	-0.0565	-0.0245682	0.1981	0.780407	FALSE	FALSE	FALSE	CffBSP	12783507	0.389596	0.028556	TRUE	reported	textfile	12	12936441	0.0148	0.000135	14288	GCST90274768.txt	TRUE	reported	textfile	TRUE	0.00101896	14.5718	8.65064
	rs60013180	T	C	T	C	0.0448	0.0233541	0.7651	0.212936	FALSE	FALSE	FALSE	CffBSP	42660868	0.415194	0.0286628	TRUE	reported	textfile	21	44080978	0.0139	0.00127	14720	GCST90274768.txt	TRUE	reported	textfile	TRUE	0.0007052	10.3865	8.65064
	rs60082305	A	G	A	G	0.0466	0.0112368	0.794	0.21068	FALSE	FALSE	FALSE	CffBSP	30615008	0.696662	0.0288247	TRUE	reported	textfile	4	30616630	0.0143	0.00112	14735	GCST90274768.txt	TRUE	reported	textfile	TRUE	0.000720173	10.618	8.65064
	rs6008960	A	G	A	G	0.0607	0.0355912	0.1037	0.928166	FALSE	FALSE	FALSE	CffBSP	46715641	0.432331	0.045327	TRUE	reported	textfile	22	47111538	0.0191	0.00148	14721	GCST90274768.txt	TRUE	reported	textfile	TRUE	0.000685607	10.0984	8.65064
	rs60598844	C	G	C	G	-0.068	0.06753	0.0986	0.069337	FALSE	TRUE	FALSE	CffBSP	13171999	0.151217	0.0470512	TRUE	reported	textfile	3	13213499	0.0208	0.00108	14288	GCST90274768.txt	TRUE	reported	textfile	TRUE	0.000747472	10.6864	8.65064
	rs6062664	T	C	T	C	0.0655	-0.00325656	0.8658	0.156753	FALSE	FALSE	FALSE	CffBSP	64210546	0.920046	0.0324438	TRUE	reported	textfile	20	62841899	0.0169	0.000106	14734	GCST90274768.txt	TRUE	reported	textfile	TRUE	0.00101846	15.0193	8.65064
	rs61333681	T	G	T	G	0.0428	-0.0450002	0.2777	0.720518	FALSE	FALSE	FALSE	CffBSP	1351851	0.0871285	0.0263045	TRUE	reported	textfile	2	1355623	0.0132	0.00119	14288	GCST90274768.txt	TRUE	reported	textfile	TRUE	0.000735273	10.5118	8.65064
	rs6138790	A	G	A	G	-0.0538	0.0264469	0.2521	0.803155	FALSE	FALSE	FALSE	CffBSP	26092151	0.373166	0.029697	TRUE	reported	textfile	20	26072787	0.0164	0.00104	9830	GCST90274768.txt	TRUE	reported	textfile	TRUE	0.00109357	10.7594	8.65064
	rs61793999	T	C	T	C	0.0841	0.0152195	0.8681	0.141303	FALSE	FALSE	FALSE	CffBSP	34481892	0.659397	0.0345312	TRUE	reported	textfile	4	34483514	0.0217	0.000106	13224	GCST90274768.txt	TRUE	reported	textfile	TRUE	0.00113453	15.0178	8.65064
	rs61963259	C	G	C	G	-0.0525	-0.0175243	0.5708	0.51766	FALSE	TRUE	TRUE	CffBSP	86036045	0.46062	0.0237513	TRUE	reported	textfile	13	86610180	0.012	1.21e-05	14288	GCST90274768.txt	TRUE	reported	textfile	FALSE	0.00133784	19.1379	8.65064
	rs61992634	T	C	T	C	0.0748	-0.00956119	0.8957	0.0778468	FALSE	FALSE	FALSE	CffBSP	92676872	0.831125	0.0448339	TRUE	reported	textfile	14	93143217	0.0193	0.000106	14735	GCST90274768.txt	TRUE	reported	textfile	TRUE	0.00101835	15.0186	8.65064
	rs62057536	A	G	A	G	-0.1369	0.0159829	0.024	0.981017	FALSE	FALSE	FALSE	CffBSP	47970354	0.847642	0.0831889	TRUE	reported	textfile	16	48004265	0.0421	0.00115	14240	GCST90274768.txt	TRUE	reported	textfile	TRUE	0.000742011	10.5726	8.65064
	rs62083453	A	G	A	G	-0.0535	-0.032337	0.7816	0.21169	FALSE	FALSE	FALSE	CffBSP	52702029	0.258733	0.0286322	TRUE	reported	textfile	18	50228399	0.014	0.000133	14722	GCST90274768.txt	TRUE	reported	textfile	TRUE	0.000990955	14.6013	8.65064
	rs62094507	T	C	T	C	0.147	0.0516917	0.9758	0.00815039	FALSE	FALSE	FALSE	CffBSP	75996496	0.687866	0.128666	TRUE	reported	textfile	18	73708451	0.0378	0.000101	14735	GCST90274768.txt	TRUE	reported	textfile	TRUE	0.00102531	15.1214	8.65064
	rs62123121	A	G	A	G	-0.3409	0.00190963	0.0216	0.983381	FALSE	FALSE	FALSE	CffBSP	7979339	0.983706	0.0935031	TRUE	reported	textfile	19	8044223	0.0429	1.92e-15	13870	GCST90274768.txt	TRUE	reported	textfile	TRUE	0.004532	63.136	8.65064
	rs623171	A	C	A	C	0.0549	-0.0562448	0.3551	0.598624	FALSE	FALSE	FALSE	CffBSP	74643179	0.018684	0.0239158	TRUE	reported	textfile	1	75108863	0.0128	1.79e-05	12792	GCST90274768.txt	TRUE	reported	textfile	TRUE	0.00143603	18.3932	8.65064
	rs62434185	T	G	T	G	0.0498	-0.0175502	0.8334	0.16266	FALSE	FALSE	FALSE	CffBSP	154567882	0.582062	0.0318876	TRUE	reported	textfile	6	154889016	0.0157	0.00151	14718	GCST90274768.txt	TRUE	reported	textfile	TRUE	0.000683146	10.0601	8.65064
	rs62450274	A	C	A	C	-0.073	0.0325045	0.8877	0.142196	FALSE	FALSE	FALSE	CffBSP	15256469	0.333047	0.0335792	TRUE	reported	textfile	7	15296094	0.0188	0.000103	14726	GCST90274768.txt	TRUE	reported	textfile	TRUE	0.00102282	15.0755	8.65064
	rs62469206	A	G	A	G	0.1122	0.0812583	0.9694	0.0273752	FALSE	FALSE	FALSE	CffBSP	114279028	0.264344	0.0728001	TRUE	reported	textfile	7	113919083	0.0343	0.00107	14736	GCST90274768.txt	TRUE	reported	textfile	TRUE	0.000725609	10.6989	8.65064
	rs62474621	T	C	T	C	0.1598	0.0720819	0.9828	0.0117724	FALSE	FALSE	FALSE	CffBSP	122514676	0.518198	0.11156	TRUE	reported	textfile	7	122154730	0.0501	0.00142	13422	GCST90274768.txt	TRUE	reported	textfile	TRUE	0.000757411	10.1722	8.65064
	rs62580948	T	G	T	G	-0.2519	-0.000826924	0.0162	0.974528	FALSE	FALSE	FALSE	CffBSP	138077861	0.991835	0.0808049	TRUE	reported	textfile	9	140972313	0.0656	0.000123	9786	GCST90274768.txt	TRUE	reported	textfile	TRUE	0.00150449	14.7421	8.65064
	rs627501	A	C	A	C	-0.0523	-0.00664201	0.428	0.463215	FALSE	FALSE	FALSE	CffBSP	21715015	0.778753	0.0236419	TRUE	reported	textfile	13	22289154	0.0119	1.11e-05	14287	GCST90274768.txt	TRUE	reported	textfile	TRUE	0.00135015	19.313	8.65064
	rs635634	T	C	T	C	-0.2482	-0.027778	0.1875	0.798179	FALSE	FALSE	FALSE	CffBSP	133279427	0.345197	0.0294275	TRUE	reported	textfile	9	136155000	0.0166	1.52e-50	11785	GCST90274768.txt	TRUE	reported	textfile	TRUE	0.0186164	223.519	8.65064
	rs6422759	A	G	A	G	0.0714	0.0377192	0.8357	0.171195	FALSE	FALSE	FALSE	CffBSP	155353266	0.228117	0.0312964	TRUE	reported	textfile	7	155145966	0.0162	1.05e-05	13660	GCST90274768.txt	TRUE	reported	textfile	TRUE	0.00142003	19.4224	8.65064
	rs642337	T	G	T	G	-0.0454	-0.0288451	0.4414	0.48045	FALSE	FALSE	FALSE	CffBSP	223751889	0.223434	0.0236931	TRUE	reported	textfile	2	224616606	0.0117	0.000104	14288	GCST90274768.txt	TRUE	reported	textfile	TRUE	0.00105272	15.0549	8.65064
	rs6426751	T	C	T	C	0.0429	-0.00527506	0.2704	0.738436	FALSE	FALSE	FALSE	CffBSP	22392285	0.843856	0.0267819	TRUE	reported	textfile	1	22718778	0.0131	0.00106	14726	GCST90274768.txt	TRUE	reported	textfile	TRUE	0.000727731	10.7229	8.65064
	rs6439071	T	C	T	C	0.0502	-0.0496548	0.7308	0.27568	FALSE	FALSE	FALSE	CffBSP	127398259	0.0613211	0.0265366	TRUE	reported	textfile	3	127117102	0.0132	0.000143	14288	GCST90274768.txt	TRUE	reported	textfile	TRUE	0.00101123	14.461	8.65064
	rs6549235	T	G	T	G	-0.0376	0.0116879	0.531	0.48311	FALSE	FALSE	FALSE	CffBSP	69540974	0.620096	0.0235778	TRUE	reported	textfile	3	69590125	0.0115	0.00108	14733	GCST90274768.txt	TRUE	reported	textfile	TRUE	0.00072506	10.6886	8.65064
	rs6556308	T	C	T	C	-0.0457	0.00133605	0.7778	0.254347	FALSE	FALSE	FALSE	CffBSP	177219700	0.960314	0.0268503	TRUE	reported	textfile	5	176646701	0.0139	0.00101	14721	GCST90274768.txt	TRUE	reported	textfile	TRUE	0.000733748	10.808	8.65064
	rs657622	A	G	A	G	0.0443	-0.0199825	0.6057	0.406967	FALSE	FALSE	FALSE	CffBSP	55657974	0.403074	0.0238984	TRUE	reported	textfile	20	54233032	0.0119	0.000197	14288	GCST90274768.txt	TRUE	reported	textfile	TRUE	0.000968994	13.8565	8.65064
	rs66568683	A	T	A	T	-0.0884	0.0426	0.0699	0.0703775	FALSE	TRUE	FALSE	CffBSP	22799802	0.359487	0.0464892	TRUE	reported	textfile	14	23269011	0.023	0.000121	14733	GCST90274768.txt	TRUE	reported	textfile	TRUE	0.00100166	14.7703	8.65064
	rs6682421	A	G	A	G	0.0418	0.00921304	0.2938	0.721394	FALSE	FALSE	FALSE	CffBSP	62971179	0.726551	0.0263442	TRUE	reported	textfile	1	63436850	0.0129	0.00119	14288	GCST90274768.txt	TRUE	reported	textfile	TRUE	0.000734315	10.4981	8.65064
	rs669586	A	T	A	T	0.0447	-0.0429313	0.5295	0.532571	FALSE	TRUE	TRUE	CffBSP	69163231	0.0684857	0.0235653	TRUE	reported	textfile	8	70075466	0.0115	0.000102	14734	GCST90274768.txt	TRUE	reported	textfile	FALSE	0.00102436	15.1064	8.65064
	rs671119	A	G	A	G	0.0551	-0.0244474	0.2383	0.72821	FALSE	FALSE	FALSE	CffBSP	23644115	0.353782	0.0263647	TRUE	reported	textfile	2	23866985	0.0142	0.000104	14288	GCST90274768.txt	TRUE	reported	textfile	TRUE	0.00105268	15.0545	8.65064
	rs6750033	A	T	A	T	-0.0658	0.00884171	0.0934	0.101185	FALSE	TRUE	FALSE	CffBSP	125265303	0.821204	0.0391232	TRUE	reported	textfile	2	126022880	0.0206	0.0014	14732	GCST90274768.txt	TRUE	reported	textfile	TRUE	0.000692078	10.2014	8.65064
	rs6752229	T	C	T	C	0.0533	-0.0438801	0.38	0.584297	FALSE	FALSE	FALSE	CffBSP	114414667	0.0694448	0.0241695	TRUE	reported	textfile	2	115172244	0.0122	1.25e-05	14287	GCST90274768.txt	TRUE	reported	textfile	TRUE	0.00133418	19.0842	8.65064
	rs6783056	T	C	T	C	-0.0855	0.0861515	0.8922	0.120753	FALSE	FALSE	FALSE	CffBSP	144555874	0.0169184	0.0360697	TRUE	reported	textfile	3	144274716	0.0194	1.05e-05	14733	GCST90274768.txt	TRUE	reported	textfile	TRUE	0.00131664	19.4209	8.65064
	rs6819327	T	C	T	C	-0.0542	-0.013211	0.1426	0.882744	FALSE	FALSE	FALSE	CffBSP	75334596	0.718802	0.0366909	TRUE	reported	textfile	4	76259806	0.0165	0.00102	14727	GCST90274768.txt	TRUE	reported	textfile	TRUE	0.000732147	10.7888	8.65064
	rs6960189	T	C	T	C	-0.0427	0.0457547	0.7071	0.264297	FALSE	FALSE	FALSE	CffBSP	138712580	0.0858539	0.0266374	TRUE	reported	textfile	7	138397325	0.0132	0.00122	14288	GCST90274768.txt	TRUE	reported	textfile	TRUE	0.000731844	10.4628	8.65064
	rs7137942	A	G	A	G	-0.0637	0.0306957	0.6502	0.348511	FALSE	FALSE	FALSE	CffBSP	80783986	0.213732	0.0246875	TRUE	reported	textfile	12	81177765	0.0133	1.67e-06	12404	GCST90274768.txt	TRUE	reported	textfile	TRUE	0.00184591	22.9354	8.65064
	rs71413428	A	G	A	G	0.1366	0.0585081	0.0387	0.973851	FALSE	FALSE	FALSE	CffBSP	125764900	0.435176	0.0749752	TRUE	reported	textfile	2	126522477	0.0319	1.85e-05	14736	GCST90274768.txt	TRUE	reported	textfile	TRUE	0.0012428	18.3342	8.65064
	rs71459327	A	G	A	G	-0.07	-0.00410545	0.0833	0.916208	FALSE	FALSE	FALSE	CffBSP	55986542	0.923488	0.0427469	TRUE	reported	textfile	12	56380326	0.0214	0.00107	14724	GCST90274768.txt	TRUE	reported	textfile	TRUE	0.000726152	10.6982	8.65064
	rs71592773	T	G	T	G	-0.2437	-0.0730364	0.9868	0.0210969	FALSE	FALSE	FALSE	CffBSP	108864189	0.381821	0.0835136	TRUE	reported	textfile	5	108199890	0.0655	0.000199	12305	GCST90274768.txt	TRUE	reported	textfile	TRUE	0.00112372	13.8407	8.65064
	rs7172250	A	G	A	G	-0.0976	-0.000113294	0.0414	0.972681	FALSE	FALSE	FALSE	CffBSP	63402189	0.998744	0.0719657	TRUE	reported	textfile	15	63694388	0.0298	0.00106	14733	GCST90274768.txt	TRUE	reported	textfile	TRUE	0.000727545	10.7253	8.65064
	rs7181813	T	C	T	C	0.0402	-0.0149536	0.2936	0.631581	FALSE	FALSE	FALSE	CffBSP	34835911	0.540697	0.0244437	TRUE	reported	textfile	15	35128112	0.0126	0.00142	14728	GCST90274768.txt	TRUE	reported	textfile	TRUE	0.000690665	10.1778	8.65064
	rs7185085	T	C	T	C	-0.2568	-0.176585	0.9931	0.000963907	FALSE	FALSE	FALSE	CffBSP	82112680	0.622071	0.358244	TRUE	reported	textfile	16	82146285	0.0792	0.00119	12291	GCST90274768.txt	TRUE	reported	textfile	TRUE	0.000854636	10.5116	8.65064
	rs7190437	A	C	A	C	-0.0539	0.0103575	0.2314	0.764621	FALSE	FALSE	FALSE	CffBSP	84258961	0.70979	0.0278324	TRUE	reported	textfile	16	84292567	0.0142	0.000147	14288	GCST90274768.txt	TRUE	reported	textfile	TRUE	0.00100738	14.4059	8.65064
	rs720222	C	G	C	G	-0.0387	-0.010215	0.3661	0.409337	FALSE	TRUE	FALSE	CffBSP	56990289	0.671617	0.0240959	TRUE	reported	textfile	20	55565345	0.012	0.00126	14720	GCST90274768.txt	TRUE	reported	textfile	TRUE	0.000706065	10.3992	8.65064
	rs7202437	A	G	A	G	0.1636	-0.0642981	0.9852	0.0238946	FALSE	FALSE	FALSE	CffBSP	82641532	0.415666	0.078994	TRUE	reported	textfile	16	82675137	0.0514	0.00146	14728	GCST90274768.txt	TRUE	reported	textfile	TRUE	0.000687382	10.1293	8.65064
	rs7215121	A	G	A	G	-0.042	0.0346426	0.3902	0.665984	FALSE	FALSE	FALSE	CffBSP	4558453	0.168684	0.0251681	TRUE	reported	textfile	17	4461748	0.0128	0.00103	14288	GCST90274768.txt	TRUE	reported	textfile	TRUE	0.000752974	10.7651	8.65064
	rs72592645	A	AAG	A	AAG	-0.0591	0.0359224	0.1663	0.857701	FALSE	FALSE	FALSE	CffBSP	21511348	0.286105	0.033676	TRUE	reported	textfile	4	21512971	0.018	0.00103	11330	GCST90274768.txt	TRUE	reported	textfile	TRUE	0.000950576	10.7784	8.65064
	rs72671217	C	G	C	G	-0.0396	-0.0393672	0.5149	0.54403	FALSE	TRUE	TRUE	CffBSP	20247310	0.0962122	0.0236653	TRUE	reported	textfile	14	20715469	0.0121	0.00107	14288	GCST90274768.txt	TRUE	reported	textfile	FALSE	0.000749071	10.7092	8.65064
	rs72704153	C	G	C	G	-0.1674	0.125196	0.0246	0.0114971	FALSE	TRUE	FALSE	CffBSP	98222047	0.268242	0.113082	TRUE	reported	textfile	14	98688384	0.0433	0.000111	14723	GCST90274768.txt	TRUE	reported	textfile	TRUE	0.00101414	14.9443	8.65064
	rs72740070	A	T	A	T	-0.2479	0.0138056	0.9902	0.980627	FALSE	TRUE	FALSE	CffBSP	221935374	0.873734	0.0868728	TRUE	reported	textfile	1	222108716	0.078	0.00148	10850	GCST90274768.txt	TRUE	reported	textfile	TRUE	0.000930101	10.0991	8.65064
	rs72801283	T	G	T	G	0.1443	-0.0220875	0.9704	0.0265199	FALSE	FALSE	FALSE	CffBSP	51501811	0.762181	0.072988	TRUE	reported	textfile	16	51535722	0.0384	0.000171	14715	GCST90274768.txt	TRUE	reported	textfile	TRUE	0.000958724	14.1192	8.65064
	rs72811389	T	C	T	C	-0.1097	-0.0504863	0.0345	0.988973	FALSE	FALSE	FALSE	CffBSP	157627722	0.652541	0.112133	TRUE	reported	textfile	5	157054730	0.0335	0.00106	14736	GCST90274768.txt	TRUE	reported	textfile	TRUE	0.000727157	10.7217	8.65064
	rs72837682	T	C	T	C	-0.0497	-0.0426175	0.7806	0.282073	FALSE	FALSE	FALSE	CffBSP	7160331	0.108438	0.0265488	TRUE	reported	textfile	17	7063650	0.0152	0.00108	14288	GCST90274768.txt	TRUE	reported	textfile	TRUE	0.000747703	10.6897	8.65064
	rs72865743	T	C	T	C	0.1021	-0.0729395	0.054	0.930297	FALSE	FALSE	FALSE	CffBSP	153632909	0.112043	0.0459005	TRUE	reported	textfile	2	154489422	0.0268	0.000139	14720	GCST90274768.txt	TRUE	reported	textfile	TRUE	0.000985022	14.5119	8.65064
	rs72887335	A	G	A	G	0.1031	-0.0765394	0.0382	0.973764	FALSE	FALSE	FALSE	CffBSP	66823571	0.301396	0.0740625	TRUE	reported	textfile	6	67533464	0.0314	0.00103	14736	GCST90274768.txt	TRUE	reported	textfile	TRUE	0.000731073	10.7795	8.65064
	rs72930851	C	G	C	G	-0.1104	0.00885124	0.9545	0.968711	FALSE	TRUE	FALSE	CffBSP	30877090	0.895326	0.0672752	TRUE	reported	textfile	18	28457056	0.0345	0.00137	11337	GCST90274768.txt	TRUE	reported	textfile	TRUE	0.000902422	10.2382	8.65064
	rs72944228	A	G	A	G	0.0961	0.0266813	0.0582	0.966696	FALSE	FALSE	FALSE	CffBSP	111855685	0.685218	0.0658226	TRUE	reported	textfile	6	112176888	0.0252	0.000137	14734	GCST90274768.txt	TRUE	reported	textfile	TRUE	0.000986045	14.5407	8.65064
	rs7296588	A	G	A	G	-0.1159	0.0226275	0.4365	0.569716	FALSE	FALSE	FALSE	CffBSP	468934	0.341315	0.0237792	TRUE	reported	textfile	12	578100	0.0116	1.66e-23	14725	GCST90274768.txt	TRUE	reported	textfile	TRUE	0.00673382	99.8141	8.65064
	rs7308163	A	G	A	G	-0.0464	0.0527644	0.6729	0.293529	FALSE	FALSE	FALSE	CffBSP	32495840	0.0408113	0.025796	TRUE	reported	textfile	12	32648774	0.0124	0.000183	14733	GCST90274768.txt	TRUE	reported	textfile	TRUE	0.000949487	14.0002	8.65064
	rs73120821	A	G	A	G	-0.0641	0.09732	0.0968	0.914458	FALSE	FALSE	FALSE	CffBSP	53604442	0.0211329	0.0422103	TRUE	reported	textfile	7	53672135	0.0197	0.00114	14736	GCST90274768.txt	TRUE	reported	textfile	TRUE	0.000717946	10.5858	8.65064
	rs73193159	A	G	A	G	-0.0527	0.0242064	0.2351	0.767662	FALSE	FALSE	FALSE	CffBSP	4848441	0.3852	0.0278761	TRUE	reported	textfile	4	4850168	0.0139	0.00015	14727	GCST90274768.txt	TRUE	reported	textfile	TRUE	0.00097511	14.3725	8.65064
	rs73210519	T	C	T	C	0.1393	-0.103791	0.9797	0.0187801	FALSE	FALSE	FALSE	CffBSP	61246353	0.228982	0.0862778	TRUE	reported	textfile	13	61820486	0.0429	0.00117	14733	GCST90274768.txt	TRUE	reported	textfile	TRUE	0.000715131	10.5421	8.65064
	rs73256839	A	T	A	T	0.0933	-0.00709965	0.9583	0.957941	FALSE	TRUE	FALSE	CffBSP	168261745	0.903563	0.0585963	TRUE	reported	textfile	6	168662425	0.0293	0.00145	14734	GCST90274768.txt	TRUE	reported	textfile	TRUE	0.000687715	10.1384	8.65064
	rs7332342	C	G	C	G	0.0932	-0.0225929	0.0625	0.0619653	FALSE	TRUE	FALSE	CffBSP	99936901	0.644539	0.0489701	TRUE	reported	textfile	13	100589155	0.024	0.000103	14736	GCST90274768.txt	TRUE	reported	textfile	TRUE	0.00102232	15.0782	8.65064
	rs73492361	T	C	T	C	-0.1224	-0.052569	0.9454	0.0333953	FALSE	FALSE	FALSE	CffBSP	385183	0.423621	0.0656985	TRUE	reported	textfile	16	435183	0.0286	1.87e-05	13671	GCST90274768.txt	TRUE	reported	textfile	TRUE	0.00133798	18.3133	8.65064
	rs73498225	T	C	T	C	0.2708	-0.122037	0.0119	0.99279	FALSE	FALSE	FALSE	CffBSP	7777810	0.364851	0.134675	TRUE	reported	textfile	19	7842696	0.0724	0.000184	12935	GCST90274768.txt	TRUE	reported	textfile	TRUE	0.0010804	13.9879	8.65064
	rs73498277	A	G	A	G	0.1717	0.00485375	0.0135	0.975552	FALSE	FALSE	FALSE	CffBSP	62295510	0.949253	0.0762634	TRUE	reported	textfile	13	62869643	0.0525	0.00107	14249	GCST90274768.txt	TRUE	reported	textfile	TRUE	0.000750087	10.6945	8.65064
	rs73512295	C	G	C	G	-0.0664	-0.0434116	0.0954	0.0491158	FALSE	TRUE	FALSE	CffBSP	69531025	0.421642	0.054023	TRUE	reported	textfile	11	69345793	0.0205	0.0012	14726	GCST90274768.txt	TRUE	reported	textfile	TRUE	0.000711925	10.4899	8.65064
	rs73632723	A	G	A	G	-0.0763	-0.0652444	0.0667	0.925149	FALSE	FALSE	FALSE	CffBSP	126348258	0.143781	0.0446312	TRUE	reported	textfile	11	126218153	0.0235	0.00117	14731	GCST90274768.txt	TRUE	reported	textfile	TRUE	0.000715106	10.5403	8.65064
	rs73968919	A	T	A	T	0.0811	-0.0891014	0.9412	0.955939	FALSE	TRUE	FALSE	CffBSP	158324382	0.135212	0.0596451	TRUE	reported	textfile	2	159180894	0.0247	0.00103	14736	GCST90274768.txt	TRUE	reported	textfile	TRUE	0.000731056	10.7793	8.65064
	rs74038062	T	C	T	C	0.079	-0.0934071	0.0822	0.947904	FALSE	FALSE	FALSE	CffBSP	91142187	0.0732504	0.0521458	TRUE	reported	textfile	15	91685417	0.0211	0.000181	14735	GCST90274768.txt	TRUE	reported	textfile	TRUE	0.000950443	14.0162	8.65064
	rs74413213	T	C	T	C	0.1096	-0.00925395	0.0378	0.977047	FALSE	FALSE	FALSE	CffBSP	22614393	0.90537	0.0778424	TRUE	reported	textfile	20	22595031	0.0335	0.00107	14736	GCST90274768.txt	TRUE	reported	textfile	TRUE	0.000725833	10.7022	8.65064
	rs74436178	A	G	A	G	0.1371	0.175883	0.9796	0.0150066	FALSE	FALSE	FALSE	CffBSP	61808634	0.0697284	0.0969766	TRUE	reported	textfile	5	61104461	0.0419	0.00107	14736	GCST90274768.txt	TRUE	reported	textfile	TRUE	0.000726025	10.705	8.65064
	rs74642393	A	G	A	G	-0.2225	-0.00844425	0.0179	0.999123	FALSE	FALSE	FALSE	CffBSP	207923399	0.983695	0.413179	TRUE	reported	textfile	1	208096744	0.0574	0.000106	13157	GCST90274768.txt	TRUE	reported	textfile	TRUE	0.00114073	15.0235	8.65064
	rs74769448	T	C	T	C	-0.0426	0.0117371	0.7042	0.296579	FALSE	FALSE	FALSE	CffBSP	150461554	0.649989	0.0258654	TRUE	reported	textfile	4	151382706	0.0131	0.00115	13864	GCST90274768.txt	TRUE	reported	textfile	TRUE	0.000762179	10.5734	8.65064
	rs7487348	A	G	A	G	0.0433	-0.0135915	0.7368	0.210323	FALSE	FALSE	FALSE	CffBSP	66540736	0.636444	0.0287542	TRUE	reported	textfile	12	66934516	0.0133	0.00113	14288	GCST90274768.txt	TRUE	reported	textfile	TRUE	0.000741274	10.5977	8.65064
	rs749072	T	C	T	C	-0.0415	0.00578388	0.7375	0.289779	FALSE	FALSE	FALSE	CffBSP	37054533	0.823831	0.0259809	TRUE	reported	textfile	3	37096024	0.013	0.00141	14718	GCST90274768.txt	TRUE	reported	textfile	TRUE	0.000691927	10.1894	8.65064
	rs74961779	T	C	T	C	-0.0416	0.0373983	0.2976	0.747292	FALSE	FALSE	FALSE	CffBSP	17162038	0.166224	0.0270133	TRUE	reported	textfile	7	17201662	0.0127	0.00105	14724	GCST90274768.txt	TRUE	reported	textfile	TRUE	0.000728177	10.728	8.65064
	rs75019231	C	G	C	G	0.1057	-0.10507	0.9479	0.966681	FALSE	TRUE	FALSE	CffBSP	138335969	0.106248	0.0650473	TRUE	reported	textfile	3	138054811	0.0281	0.000169	14719	GCST90274768.txt	TRUE	reported	textfile	TRUE	0.000960377	14.1475	8.65064
	rs7512333	T	C	T	C	-0.1957	-0.0983734	0.9798	0.0269004	FALSE	FALSE	FALSE	CffBSP	10521143	0.174206	0.0723966	TRUE	reported	textfile	1	10581200	0.0507	0.000113	14247	GCST90274768.txt	TRUE	reported	textfile	TRUE	0.00104469	14.8972	8.65064
	rs75216028	A	T	A	T	-0.0757	0.061752	0.0738	0.0373948	FALSE	TRUE	FALSE	CffBSP	87814179	0.324819	0.0627176	TRUE	reported	textfile	14	88280523	0.0232	0.0011	14718	GCST90274768.txt	TRUE	reported	textfile	TRUE	0.000722858	10.6453	8.65064
	rs75241954	T	C	T	C	0.179	-0.041415	0.017	0.989157	FALSE	FALSE	FALSE	CffBSP	100964581	0.717505	0.114471	TRUE	reported	textfile	2	101581043	0.0467	0.000127	14734	GCST90274768.txt	TRUE	reported	textfile	TRUE	0.000996136	14.6897	8.65064
	rs75298702	A	C	A	C	0.1576	0.0689224	0.9739	0.0257167	FALSE	FALSE	FALSE	CffBSP	197442029	0.355123	0.0745351	TRUE	reported	textfile	3	197168900	0.048	0.00103	11781	GCST90274768.txt	TRUE	reported	textfile	TRUE	0.00091422	10.7784	8.65064
	rs75320122	T	C	T	C	0.1361	-0.063695	0.9702	0.0554429	FALSE	FALSE	FALSE	CffBSP	88289710	0.218941	0.051812	TRUE	reported	textfile	5	87585527	0.0363	0.000177	14736	GCST90274768.txt	TRUE	reported	textfile	TRUE	0.000953036	14.0554	8.65064
	rs753778	A	G	A	G	0.0484	0.00725887	0.3216	0.689998	FALSE	FALSE	FALSE	CffBSP	141218810	0.776186	0.0255332	TRUE	reported	textfile	8	142228909	0.0125	0.000108	14733	GCST90274768.txt	TRUE	reported	textfile	TRUE	0.00101657	14.9903	8.65064
	rs75557442	T	C	T	C	0.1349	0.111401	0.9717	0.0146379	FALSE	FALSE	FALSE	CffBSP	114873944	0.27087	0.101176	TRUE	reported	textfile	4	115795100	0.0411	0.00103	14725	GCST90274768.txt	TRUE	reported	textfile	TRUE	0.000731084	10.7716	8.65064
	rs75593291	T	G	T	G	-0.0508	0.066998	0.1657	0.831324	FALSE	FALSE	FALSE	CffBSP	212962409	0.0323758	0.0313112	TRUE	reported	textfile	2	213827133	0.0157	0.00121	14730	GCST90274768.txt	TRUE	reported	textfile	TRUE	0.000710259	10.4681	8.65064
	rs75637745	A	G	A	G	0.1636	-0.0319498	0.0163	0.997702	FALSE	FALSE	FALSE	CffBSP	113216448	0.896137	0.244745	TRUE	reported	textfile	11	113087170	0.0498	0.00102	14736	GCST90274768.txt	TRUE	reported	textfile	TRUE	0.00073183	10.7907	8.65064
	rs75693428	A	G	A	G	-0.1241	-0.0518221	0.0315	0.991124	FALSE	FALSE	FALSE	CffBSP	105654913	0.673529	0.123002	TRUE	reported	textfile	1	106197535	0.0392	0.00155	13801	GCST90274768.txt	TRUE	reported	textfile	TRUE	0.000725681	10.0209	8.65064
	rs75699767	A	T	A	T	0.3562	-0.0317376	0.0218	0.0266373	FALSE	TRUE	FALSE	CffBSP	66838257	0.658534	0.0718145	TRUE	reported	textfile	3	66888681	0.0957	0.000198	8859	GCST90274768.txt	TRUE	reported	textfile	TRUE	0.00156135	13.8505	8.65064
	rs75742102	T	C	T	C	0.1448	-0.12256	0.0197	0.995506	FALSE	FALSE	FALSE	CffBSP	42983671	0.474423	0.171341	TRUE	reported	textfile	20	41612311	0.0447	0.0012	14249	GCST90274768.txt	TRUE	reported	textfile	TRUE	0.000735899	10.4921	8.65064
	rs75860909	A	G	A	G	0.2121	0.105901	0.991	0.0210318	FALSE	FALSE	FALSE	CffBSP	139638205	0.20174	0.082955	TRUE	reported	textfile	6	139959342	0.0666	0.00145	14736	GCST90274768.txt	TRUE	reported	textfile	TRUE	0.000687788	10.1408	8.65064
	rs76032479	T	C	T	C	0.1267	-0.0224384	0.0283	0.982149	FALSE	FALSE	FALSE	CffBSP	176415476	0.798688	0.0879782	TRUE	reported	textfile	4	177336627	0.0386	0.00103	14723	GCST90274768.txt	TRUE	reported	textfile	TRUE	0.000731248	10.7726	8.65064
	rs76054845	T	C	T	C	0.1374	0.023466	0.0227	0.972182	FALSE	FALSE	FALSE	CffBSP	116507165	0.749639	0.0735344	TRUE	reported	textfile	7	116147219	0.0432	0.00147	14288	GCST90274768.txt	TRUE	reported	textfile	TRUE	0.000707501	10.1145	8.65064
	rs76068097	A	T	A	T	0.0856	-0.0236903	0.0995	0.173043	FALSE	TRUE	FALSE	CffBSP	24370231	0.44619	0.0310985	TRUE	reported	textfile	5	24370340	0.0226	0.000152	12404	GCST90274768.txt	TRUE	reported	textfile	TRUE	0.00115523	14.3437	8.65064
	rs76161931	T	C	T	C	0.0799	-0.0140135	0.909	0.0470237	FALSE	FALSE	FALSE	CffBSP	152002737	0.801406	0.0557137	TRUE	reported	textfile	3	151720526	0.0206	0.000105	14288	GCST90274768.txt	TRUE	reported	textfile	TRUE	0.00105179	15.0417	8.65064
	rs76275427	A	C	A	C	-0.1526	-0.0751659	0.9777	0.011369	FALSE	FALSE	FALSE	CffBSP	6299603	0.496337	0.110495	TRUE	reported	textfile	7	6339234	0.0464	0.00101	12358	GCST90274768.txt	TRUE	reported	textfile	TRUE	0.00087447	10.8144	8.65064
	rs76316562	T	C	T	C	-0.1472	0.150824	0.0186	0.972005	FALSE	FALSE	FALSE	CffBSP	110252257	0.0395612	0.073276	TRUE	reported	textfile	3	109971104	0.0462	0.00144	14734	GCST90274768.txt	TRUE	reported	textfile	TRUE	0.000688513	10.1502	8.65064
	rs76583355	A	G	A	G	-0.1448	0.0179119	0.0281	0.987445	FALSE	FALSE	FALSE	CffBSP	138086141	0.863677	0.104324	TRUE	reported	textfile	4	139007295	0.0389	0.000197	14725	GCST90274768.txt	TRUE	reported	textfile	TRUE	0.0009401	13.8541	8.65064
	rs76674123	T	C	T	C	-0.1342	-0.0938306	0.0341	0.983616	FALSE	FALSE	FALSE	CffBSP	116912499	0.314519	0.093291	TRUE	reported	textfile	1	117455121	0.0358	0.000178	14288	GCST90274768.txt	TRUE	reported	textfile	TRUE	0.000982518	14.0501	8.65064
	rs7668648	T	G	T	G	-0.1375	0.244708	0.9765	0.0111684	FALSE	FALSE	FALSE	CffBSP	54907304	0.0303061	0.112973	TRUE	reported	textfile	4	55773470	0.0425	0.00122	14288	GCST90274768.txt	TRUE	reported	textfile	TRUE	0.000732045	10.4657	8.65064
	rs7682578	A	G	A	G	-0.0452	0.00974787	0.4189	0.535283	FALSE	FALSE	FALSE	CffBSP	91370948	0.679994	0.0236328	TRUE	reported	textfile	4	92292099	0.0118	0.000128	14726	GCST90274768.txt	TRUE	reported	textfile	TRUE	0.000995395	14.6708	8.65064
	rs7706891	C	G	C	G	-0.049	0.0112627	0.7309	0.763102	FALSE	TRUE	FALSE	CffBSP	32722228	0.683775	0.0276511	TRUE	reported	textfile	5	32722334	0.0129	0.000146	14704	GCST90274768.txt	TRUE	reported	textfile	TRUE	0.000980283	14.4263	8.65064
	rs77102584	A	G	A	G	0.1575	0.00504141	0.0269	0.987052	FALSE	FALSE	FALSE	CffBSP	2591040	0.96237	0.106854	TRUE	reported	textfile	2	2594812	0.0418	0.000165	14288	GCST90274768.txt	TRUE	reported	textfile	TRUE	0.000992672	14.1954	8.65064
	rs7719765	T	C	T	C	0.094	0.0285118	0.0519	0.924479	FALSE	FALSE	FALSE	CffBSP	51954100	0.522928	0.0446307	TRUE	reported	textfile	5	51249934	0.0296	0.00149	12845	GCST90274768.txt	TRUE	reported	textfile	TRUE	0.000784508	10.0833	8.65064
	rs7729163	A	G	A	G	-0.054	0.00775029	0.7482	0.259142	FALSE	FALSE	FALSE	CffBSP	113275956	0.77444	0.0270448	TRUE	reported	textfile	5	112611653	0.0143	0.000159	12837	GCST90274768.txt	TRUE	reported	textfile	TRUE	0.00110961	14.2576	8.65064
	rs7733	C	G	C	G	0.1041	0.104576	0.9437	0.973472	FALSE	TRUE	FALSE	CffBSP	22869605	0.166151	0.0755238	TRUE	reported	textfile	15	23003463	0.0277	0.000171	14288	GCST90274768.txt	TRUE	reported	textfile	TRUE	0.00098751	14.1215	8.65064
	rs77349939	A	G	A	G	0.2203	-0.164165	0.9885	0.00277234	FALSE	FALSE	FALSE	CffBSP	105216522	0.433914	0.209793	TRUE	reported	textfile	3	104935366	0.0676	0.00112	11439	GCST90274768.txt	TRUE	reported	textfile	TRUE	0.000927565	10.6184	8.65064
	rs77352129	A	G	A	G	-0.1189	-0.048993	0.9557	0.0272353	FALSE	FALSE	FALSE	CffBSP	167772826	0.496219	0.0720007	TRUE	reported	textfile	2	168629336	0.031	0.000125	14736	GCST90274768.txt	TRUE	reported	textfile	TRUE	0.000997304	14.7089	8.65064
	rs774296	A	G	A	G	-0.0481	-0.0578895	0.7997	0.239327	FALSE	FALSE	FALSE	CffBSP	84769282	0.0383275	0.0279479	TRUE	reported	textfile	16	84802888	0.0148	0.00115	14288	GCST90274768.txt	TRUE	reported	textfile	TRUE	0.000738711	10.561	8.65064
	rs77432539	A	C	A	C	0.2296	-0.067897	0.02	0.943841	FALSE	FALSE	FALSE	CffBSP	64029981	0.202496	0.0532745	TRUE	reported	textfile	6	64739874	0.0717	0.00136	13306	GCST90274768.txt	TRUE	reported	textfile	TRUE	0.000770058	10.2527	8.65064
	rs77442360	A	G	A	G	0.2814	0.171229	0.0106	0.996799	FALSE	FALSE	FALSE	CffBSP	17430936	0.416565	0.210771	TRUE	reported	textfile	5	17431045	0.0726	0.000106	11961	GCST90274768.txt	TRUE	reported	textfile	TRUE	0.00125448	15.0211	8.65064
	rs77492523	T	C	T	C	0.1027	0.10099	0.0571	0.974629	FALSE	FALSE	FALSE	CffBSP	6469747	0.166641	0.0730185	TRUE	reported	textfile	1	6529807	0.0267	0.00012	13224	GCST90274768.txt	TRUE	reported	textfile	TRUE	0.00111756	14.7929	8.65064
	rs7751698	A	C	A	C	0.0681	0.0285182	0.8593	0.128372	FALSE	FALSE	FALSE	CffBSP	157156547	0.418249	0.0352311	TRUE	reported	textfile	6	157477681	0.0176	0.000109	14734	GCST90274768.txt	TRUE	reported	textfile	TRUE	0.0010151	14.9696	8.65064
	rs7754358	A	C	A	C	0.1396	0.00837889	0.9727	0.0300028	FALSE	FALSE	FALSE	CffBSP	18089201	0.903189	0.0688859	TRUE	reported	textfile	6	18089432	0.0369	0.000155	14731	GCST90274768.txt	TRUE	reported	textfile	TRUE	0.000970653	14.3106	8.65064
	rs77590288	A	C	A	C	-0.149	0.0638227	0.9789	0.0313192	FALSE	FALSE	FALSE	CffBSP	118947556	0.352331	0.0686208	TRUE	reported	textfile	7	118587610	0.0457	0.00111	14288	GCST90274768.txt	TRUE	reported	textfile	TRUE	0.00074344	10.6287	8.65064
	rs77660932	T	C	T	C	0.0505	0.0246681	0.8296	0.168502	FALSE	FALSE	FALSE	CffBSP	45091584	0.431973	0.0313915	TRUE	reported	textfile	19	45594842	0.0154	0.00104	14735	GCST90274768.txt	TRUE	reported	textfile	TRUE	0.000729246	10.7518	8.65064
	rs77692797	C	G	C	G	-0.1445	-0.0193058	0.0413	0.0401053	FALSE	TRUE	FALSE	CffBSP	51881537	0.752681	0.0612677	TRUE	reported	textfile	17	49958897	0.0332	1.35e-05	14288	GCST90274768.txt	TRUE	reported	textfile	TRUE	0.00132408	18.9408	8.65064
	rs7778788	A	C	A	C	0.0533	0.0153747	0.7812	0.175772	FALSE	FALSE	FALSE	CffBSP	32307362	0.61531	0.0305959	TRUE	reported	textfile	7	32346974	0.0141	0.000157	14733	GCST90274768.txt	TRUE	reported	textfile	TRUE	0.000968956	14.2875	8.65064
	rs77854445	A	T	A	T	0.0628	-0.0129725	0.1631	0.163225	FALSE	TRUE	FALSE	CffBSP	137712441	0.685037	0.0319834	TRUE	reported	textfile	4	138633595	0.0164	0.000129	14288	GCST90274768.txt	TRUE	reported	textfile	TRUE	0.00102521	14.6612	8.65064
	rs77960034	T	C	T	C	-0.1298	-0.0654699	0.964	0.0289736	FALSE	FALSE	FALSE	CffBSP	90334200	0.359262	0.0714134	TRUE	reported	textfile	4	91255351	0.0335	0.000107	14736	GCST90274768.txt	TRUE	reported	textfile	TRUE	0.00101774	15.0107	8.65064
	rs7802900	A	G	A	G	-0.1353	-0.0320206	0.9708	0.032649	FALSE	FALSE	FALSE	CffBSP	130069241	0.62782	0.0660496	TRUE	reported	textfile	7	129709081	0.042	0.00128	11773	GCST90274768.txt	TRUE	reported	textfile	TRUE	0.000880698	10.3758	8.65064
	rs78072514	T	G	T	G	0.0899	0.162656	0.951	0.0216887	FALSE	FALSE	FALSE	CffBSP	100188884	0.0457878	0.0814363	TRUE	reported	textfile	8	101201112	0.028	0.00132	14731	GCST90274768.txt	TRUE	reported	textfile	TRUE	0.000699306	10.3073	8.65064
	rs78108279	T	C	T	C	0.0717	-0.0243532	0.0786	0.944663	FALSE	FALSE	FALSE	CffBSP	10304839	0.638566	0.0518479	TRUE	reported	textfile	18	10304836	0.0219	0.00106	14721	GCST90274768.txt	TRUE	reported	textfile	TRUE	0.000727607	10.7174	8.65064
	rs7863194	A	T	A	T	0.0385	-0.0134795	0.5684	0.641516	FALSE	TRUE	TRUE	CffBSP	70563028	0.580434	0.0243863	TRUE	reported	textfile	9	73177944	0.0117	0.001	14735	GCST90274768.txt	TRUE	reported	textfile	FALSE	0.000734312	10.8266	8.65064
	rs78643851	T	G	T	G	-0.1921	0.00252699	0.0258	0.980542	FALSE	FALSE	FALSE	CffBSP	69891594	0.97712	0.0881103	TRUE	reported	textfile	11	69706362	0.0445	1.58e-05	13224	GCST90274768.txt	TRUE	reported	textfile	TRUE	0.00140721	18.6324	8.65064
	rs7867518	T	C	T	C	-0.0375	0.0154866	0.4906	0.524104	FALSE	FALSE	FALSE	CffBSP	2527525	0.511447	0.0235866	TRUE	reported	textfile	9	2527525	0.0118	0.00148	14288	GCST90274768.txt	TRUE	reported	textfile	TRUE	0.00070635	10.0981	8.65064
	rs78690349	A	G	A	G	-0.1774	0.0993739	0.9861	0.0118327	FALSE	FALSE	FALSE	CffBSP	114971597	0.363113	0.109268	TRUE	reported	textfile	8	115983826	0.0547	0.00118	13801	GCST90274768.txt	TRUE	reported	textfile	TRUE	0.000761537	10.5165	8.65064
	rs787362	A	T	A	T	0.0388	0.0295243	0.4459	0.478203	FALSE	TRUE	TRUE	CffBSP	67039213	0.21184	0.0236474	TRUE	reported	textfile	4	67904931	0.0118	0.00101	14288	GCST90274768.txt	TRUE	reported	textfile	FALSE	0.000756135	10.8103	8.65064
	rs7875016	T	G	T	G	0.0815	-0.0650908	0.9419	0.0382304	FALSE	FALSE	FALSE	CffBSP	90135867	0.290232	0.0615451	TRUE	reported	textfile	9	92898149	0.0251	0.00117	14722	GCST90274768.txt	TRUE	reported	textfile	TRUE	0.000715632	10.5417	8.65064
	rs7894967	A	G	A	G	0.1213	-0.118215	0.9706	0.0137478	FALSE	FALSE	FALSE	CffBSP	79125474	0.246837	0.102079	TRUE	reported	textfile	10	80885231	0.037	0.00104	14736	GCST90274768.txt	TRUE	reported	textfile	TRUE	0.000728823	10.7463	8.65064
	rs789886	A	G	A	G	0.0727	0.00668072	0.0834	0.867388	FALSE	FALSE	FALSE	CffBSP	36060122	0.847217	0.0346743	TRUE	reported	textfile	15	36352323	0.0223	0.00111	14288	GCST90274768.txt	TRUE	reported	textfile	TRUE	0.000743301	10.6267	8.65064
	rs7902259	T	C	T	C	0.0466	-0.00949986	0.7215	0.235374	FALSE	FALSE	FALSE	CffBSP	95080112	0.733142	0.027863	TRUE	reported	textfile	10	96839869	0.0146	0.00141	11538	GCST90274768.txt	TRUE	reported	textfile	TRUE	0.00088217	10.1857	8.65064
	rs79078204	A	C	A	C	-0.105	-0.0190411	0.9317	0.103426	FALSE	FALSE	FALSE	CffBSP	95867941	0.627632	0.039255	TRUE	reported	textfile	5	95203645	0.032	0.00103	11777	GCST90274768.txt	TRUE	reported	textfile	TRUE	0.000913371	10.7648	8.65064
	rs79186871	T	C	T	C	-0.0969	-0.0307877	0.9478	0.0472129	FALSE	FALSE	FALSE	CffBSP	196363754	0.579725	0.0555949	TRUE	reported	textfile	2	197228478	0.0302	0.00133	14731	GCST90274768.txt	TRUE	reported	textfile	TRUE	0.00069839	10.2938	8.65064
	rs79290446	A	T	A	T	0.1822	0.0486173	0.9833	0.976383	FALSE	TRUE	FALSE	CffBSP	126526052	0.532465	0.0778816	TRUE	reported	textfile	7	126166106	0.0574	0.0015	11778	GCST90274768.txt	TRUE	reported	textfile	TRUE	0.000854732	10.0739	8.65064
	rs79430413	A	G	A	G	0.1475	-0.0040783	0.9808	0.0068754	FALSE	FALSE	FALSE	CffBSP	169473995	0.977326	0.143496	TRUE	reported	textfile	5	168900999	0.0458	0.00128	13801	GCST90274768.txt	TRUE	reported	textfile	TRUE	0.000750959	10.3703	8.65064
	rs79488434	A	G	A	G	0.1439	-0.14468	0.9794	0.0092958	FALSE	FALSE	FALSE	CffBSP	79534020	0.236157	0.122129	TRUE	reported	textfile	14	80000363	0.0444	0.00119	14736	GCST90274768.txt	TRUE	reported	textfile	TRUE	0.000712306	10.5026	8.65064
	rs79500308	C	G	C	G	-0.1479	0.0514616	0.9728	0.979001	FALSE	TRUE	FALSE	CffBSP	2442306	0.530706	0.0820851	TRUE	reported	textfile	7	2481941	0.0459	0.00127	13224	GCST90274768.txt	TRUE	reported	textfile	TRUE	0.000784526	10.3811	8.65064
	rs79508141	A	G	A	G	-0.1512	0.0714678	0.0252	0.979933	FALSE	FALSE	FALSE	CffBSP	51168089	0.402272	0.0853276	TRUE	reported	textfile	8	52080649	0.0397	0.00014	14717	GCST90274768.txt	TRUE	reported	textfile	TRUE	0.000984635	14.5032	8.65064
	rs7955206	T	C	T	C	-0.1585	-0.216349	0.9774	0.00326948	FALSE	FALSE	FALSE	CffBSP	11717173	0.289872	0.204411	TRUE	reported	textfile	12	11870107	0.0422	0.000173	14733	GCST90274768.txt	TRUE	reported	textfile	TRUE	0.000956592	14.1051	8.65064
	rs79803379	T	TA	T	TA	-0.1398	-0.169967	0.9653	0.0322145	FALSE	FALSE	FALSE	CffBSP	35115727	0.0117763	0.06748	TRUE	reported	textfile	1	35581328	0.0442	0.00156	8369	GCST90274768.txt	TRUE	reported	textfile	TRUE	0.00119393	10.0015	8.65064
	rs79805415	T	C	T	C	0.11	-0.0312351	0.047	0.932496	FALSE	FALSE	FALSE	CffBSP	166799506	0.504594	0.0468097	TRUE	reported	textfile	3	166517294	0.0288	0.000134	14735	GCST90274768.txt	TRUE	reported	textfile	TRUE	0.000989055	14.5862	8.65064
	rs79922446	T	C	T	C	0.0592	-0.0439136	0.1723	0.836303	FALSE	FALSE	FALSE	CffBSP	144448928	0.167833	0.0318399	TRUE	reported	textfile	7	144146021	0.0153	0.000109	14729	GCST90274768.txt	TRUE	reported	textfile	TRUE	0.00101542	14.9693	8.65064
	rs8000060	T	C	T	C	0.0614	0.0134359	0.8343	0.203012	FALSE	FALSE	FALSE	CffBSP	111435673	0.648464	0.0294713	TRUE	reported	textfile	13	112088020	0.0164	0.000181	14729	GCST90274768.txt	TRUE	reported	textfile	TRUE	0.000950742	14.0149	8.65064
	rs8002669	A	T	A	T	0.0508	-0.0575948	0.7226	0.710087	FALSE	TRUE	FALSE	CffBSP	40312400	0.0258428	0.0258438	TRUE	reported	textfile	13	40886537	0.0131	0.000105	14288	GCST90274768.txt	TRUE	reported	textfile	TRUE	0.00105137	15.0357	8.65064
	rs80119262	C	G	C	G	-0.074	-0.0808285	0.9251	0.944504	FALSE	TRUE	FALSE	CffBSP	31398635	0.107107	0.0501624	TRUE	reported	textfile	11	31420182	0.0229	0.00123	14288	GCST90274768.txt	TRUE	reported	textfile	TRUE	0.000730304	10.4407	8.65064
	rs80209946	T	C	T	C	-0.1894	0.0829427	0.0123	0.9857	FALSE	FALSE	FALSE	CffBSP	18330346	0.401999	0.0989703	TRUE	reported	textfile	4	18331969	0.0594	0.00143	13801	GCST90274768.txt	TRUE	reported	textfile	TRUE	0.000736134	10.1654	8.65064
	rs80248075	T	C	T	C	0.0757	-0.0321706	0.0707	0.957193	FALSE	FALSE	FALSE	CffBSP	68973707	0.579907	0.0581199	TRUE	reported	textfile	2	69200839	0.0232	0.0011	14719	GCST90274768.txt	TRUE	reported	textfile	TRUE	0.000722809	10.6453	8.65064
	rs80323144	A	C	A	C	0.0534	-0.0377628	0.8376	0.154369	FALSE	FALSE	FALSE	CffBSP	109859058	0.249465	0.0327902	TRUE	reported	textfile	13	110511405	0.0166	0.0013	14288	GCST90274768.txt	TRUE	reported	textfile	TRUE	0.000723736	10.3468	8.65064
	rs80330633	T	C	T	C	-0.1596	-0.0040725	0.9771	0.0733238	FALSE	FALSE	FALSE	CffBSP	187745045	0.932224	0.0478855	TRUE	reported	textfile	4	188666199	0.0488	0.00107	14288	GCST90274768.txt	TRUE	reported	textfile	TRUE	0.000748048	10.6946	8.65064
	rs8033458	T	C	T	C	-0.2082	0.00821215	0.9868	0.0374439	FALSE	FALSE	FALSE	CffBSP	58335543	0.895151	0.062313	TRUE	reported	textfile	15	58627742	0.0551	0.000158	14730	GCST90274768.txt	TRUE	reported	textfile	TRUE	0.000968355	14.2758	8.65064
	rs80353059	A	C	A	C	-0.1148	-0.0852583	0.9485	0.0135511	FALSE	FALSE	FALSE	CffBSP	197430923	0.403474	0.102053	TRUE	reported	textfile	2	198295647	0.0307	0.000184	14288	GCST90274768.txt	TRUE	reported	textfile	TRUE	0.000977712	13.9813	8.65064
	rs8064938	A	G	A	G	0.0602	0.0482083	0.1592	0.86523	FALSE	FALSE	FALSE	CffBSP	48703467	0.163994	0.0346383	TRUE	reported	textfile	17	46780829	0.0188	0.00136	11337	GCST90274768.txt	TRUE	reported	textfile	TRUE	0.000903621	10.2518	8.65064
	rs8076227	T	G	T	G	-0.0436	0.0120145	0.4762	0.528121	FALSE	FALSE	FALSE	CffBSP	79426597	0.610155	0.0235647	TRUE	reported	textfile	17	77422679	0.0134	0.00114	11784	GCST90274768.txt	TRUE	reported	textfile	TRUE	0.000897595	10.585	8.65064
	rs825206	T	C	T	C	0.072	0.0137262	0.076	0.892981	FALSE	FALSE	FALSE	CffBSP	64306763	0.720356	0.0383429	TRUE	reported	textfile	1	64772446	0.0219	0.00101	14734	GCST90274768.txt	TRUE	reported	textfile	TRUE	0.000733057	10.8073	8.65064
	rs838887	C	G	C	G	0.0511	0.0285851	0.6741	0.663791	FALSE	TRUE	FALSE	CffBSP	124781427	0.252646	0.0249882	TRUE	reported	textfile	12	125265973	0.0132	0.000108	14287	GCST90274768.txt	TRUE	reported	textfile	TRUE	0.00104785	14.9842	8.65064
	rs847748	A	G	A	G	0.1044	-0.126661	0.9528	0.025563	FALSE	FALSE	FALSE	CffBSP	40109837	0.091884	0.0751456	TRUE	reported	textfile	6	40077576	0.0325	0.00132	11337	GCST90274768.txt	TRUE	reported	textfile	TRUE	0.000909371	10.3171	8.65064
	rs851850	A	G	A	G	-0.0777	-0.00747646	0.846	0.141505	FALSE	FALSE	FALSE	CffBSP	66375184	0.825644	0.033939	TRUE	reported	textfile	6	67085077	0.0163	1.87e-06	14288	GCST90274768.txt	TRUE	reported	textfile	TRUE	0.00158783	22.7199	8.65064
	rs9355324	A	G	A	G	-0.0855	-0.0106032	0.1022	0.936604	FALSE	FALSE	FALSE	CffBSP	160978161	0.827159	0.0485614	TRUE	reported	textfile	6	161399193	0.0195	1.16e-05	14735	GCST90274768.txt	TRUE	reported	textfile	TRUE	0.00130301	19.2222	8.65064
	rs9371910	T	C	T	C	0.0722	0.0283526	0.0957	0.885345	FALSE	FALSE	FALSE	CffBSP	155661862	0.443111	0.036968	TRUE	reported	textfile	6	155982996	0.0226	0.0014	11775	GCST90274768.txt	TRUE	reported	textfile	TRUE	0.000866005	10.2043	8.65064
	rs9375229	A	C	A	C	-0.044	0.0466704	0.2683	0.758103	FALSE	FALSE	FALSE	CffBSP	123158916	0.0916748	0.0276708	TRUE	reported	textfile	6	123480061	0.0136	0.00122	14288	GCST90274768.txt	TRUE	reported	textfile	TRUE	0.000732045	10.4657	8.65064
	rs9390208	A	G	A	G	0.0487	-0.0535687	0.2608	0.72547	FALSE	FALSE	FALSE	CffBSP	144749772	0.0407108	0.0261762	TRUE	reported	textfile	6	145070908	0.0148	0.001	11782	GCST90274768.txt	TRUE	reported	textfile	TRUE	0.000918156	10.8258	8.65064
	rs9490538	T	C	T	C	-0.1473	0.410018	0.9818	0.00433732	FALSE	FALSE	FALSE	CffBSP	122729519	0.00660876	0.150967	TRUE	reported	textfile	6	123050664	0.045	0.00106	14735	GCST90274768.txt	TRUE	reported	textfile	TRUE	0.000726632	10.7133	8.65064
	rs9513119	T	C	T	C	-0.043	-0.0269959	0.5479	0.546305	FALSE	FALSE	FALSE	CffBSP	96267348	0.253548	0.0236438	TRUE	reported	textfile	13	96919602	0.0115	0.000185	14736	GCST90274768.txt	TRUE	reported	textfile	TRUE	0.000947872	13.9792	8.65064
	rs9524695	A	G	A	G	0.0818	0.0478171	0.9188	0.0626485	FALSE	FALSE	FALSE	CffBSP	94947828	0.327437	0.0488284	TRUE	reported	textfile	13	95600082	0.0214	0.000132	14729	GCST90274768.txt	TRUE	reported	textfile	TRUE	0.000991004	14.609	8.65064
	rs9544506	T	C	T	C	-0.1509	0.282098	0.9655	0.0102473	FALSE	FALSE	FALSE	CffBSP	77442760	0.0130404	0.113627	TRUE	reported	textfile	13	78016895	0.0342	1.02e-05	14729	GCST90274768.txt	TRUE	reported	textfile	TRUE	0.00132002	19.4656	8.65064
	rs9577024	T	C	T	C	0.0532	-0.0132908	0.1896	0.806461	FALSE	FALSE	FALSE	CffBSP	40418126	0.661715	0.0303757	TRUE	reported	textfile	13	40992263	0.0164	0.00118	12404	GCST90274768.txt	TRUE	reported	textfile	TRUE	0.000847628	10.5212	8.65064
	rs9630218	T	C	T	C	0.0387	-0.0282889	0.4026	0.578409	FALSE	FALSE	FALSE	CffBSP	70064734	0.236425	0.0238932	TRUE	reported	textfile	11	69910840	0.0121	0.00138	14288	GCST90274768.txt	TRUE	reported	textfile	TRUE	0.000715433	10.228	8.65064
	rs9695196	A	G	A	G	0.1531	0.076678	0.0286	0.965325	FALSE	FALSE	FALSE	CffBSP	137370643	0.264188	0.0686743	TRUE	reported	textfile	9	140265095	0.0466	0.00102	9371	GCST90274768.txt	TRUE	reported	textfile	TRUE	0.00115052	10.7916	8.65064
	rs970265	T	G	T	G	-0.0384	0.027439	0.5047	0.482357	FALSE	FALSE	FALSE	CffBSP	1177771	0.24808	0.0237562	TRUE	reported	textfile	3	1219455	0.0118	0.00114	14288	GCST90274768.txt	TRUE	reported	textfile	TRUE	0.000740637	10.5886	8.65064
	rs9789039	A	C	A	C	0.0416	-0.0199068	0.6888	0.337987	FALSE	FALSE	FALSE	CffBSP	69062693	0.425168	0.0249619	TRUE	reported	textfile	17	67058834	0.0127	0.00105	14287	GCST90274768.txt	TRUE	reported	textfile	TRUE	0.000750433	10.728	8.65064
	rs9819538	A	C	A	C	-0.045	0.0146427	0.3428	0.643308	FALSE	FALSE	FALSE	CffBSP	31682876	0.551916	0.0246141	TRUE	reported	textfile	3	31724368	0.0138	0.00111	13238	GCST90274768.txt	TRUE	reported	textfile	TRUE	0.000802594	10.6317	8.65064
	rs988200	C	G	C	G	-0.0434	0.0222752	0.7322	0.675941	FALSE	TRUE	FALSE	CffBSP	22154715	0.38093	0.0254229	TRUE	reported	textfile	22	22509108	0.0132	0.00101	14288	GCST90274768.txt	TRUE	reported	textfile	TRUE	0.000756017	10.8086	8.65064
	rs9883009	T	C	T	C	0.0375	0.00803952	0.4989	0.490878	FALSE	FALSE	FALSE	CffBSP	132893526	0.732997	0.0235665	TRUE	reported	textfile	3	132612370	0.0115	0.00111	14725	GCST90274768.txt	TRUE	reported	textfile	TRUE	0.000721603	10.6318	8.65064
	rs988851	A	C	A	C	0.0497	-0.0395288	0.7191	0.311459	FALSE	FALSE	FALSE	CffBSP	90170658	0.119121	0.0253637	TRUE	reported	textfile	8	91182886	0.0128	0.000103	14731	GCST90274768.txt	TRUE	reported	textfile	TRUE	0.00102239	15.0742	8.65064
	rs9902995	A	G	A	G	0.0532	0.0126847	0.7511	0.184378	FALSE	FALSE	FALSE	CffBSP	61763824	0.675179	0.0302701	TRUE	reported	textfile	17	59841185	0.0137	0.000103	14288	GCST90274768.txt	TRUE	reported	textfile	TRUE	0.00105427	15.0772	8.65064
	rs9917341	A	G	A	G	0.0506	-0.0316622	0.1829	0.83171	FALSE	FALSE	FALSE	CffBSP	25490056	0.321666	0.0319484	TRUE	reported	textfile	2	25712925	0.0155	0.0011	14288	GCST90274768.txt	TRUE	reported	textfile	TRUE	0.000745319	10.6556	8.65064
	rs9951695	T	C	T	C	0.0571	-0.0150046	0.8682	0.0794364	FALSE	FALSE	FALSE	CffBSP	61729213	0.728925	0.0432962	TRUE	reported	textfile	18	59396446	0.0174	0.00103	14731	GCST90274768.txt	TRUE	reported	textfile	TRUE	0.000730507	10.7675	8.65064
	rs9989341	T	G	T	G	0.1067	-0.0922968	0.9558	0.0260465	FALSE	FALSE	FALSE	CffBSP	101511926	0.21394	0.074265	TRUE	reported	textfile	15	102052129	0.0332	0.00131	11340	GCST90274768.txt	TRUE	reported	textfile	TRUE	0.000910006	10.327	8.65064
GCST90274769	rs112641086	T	C	T	C	-0.1056	-0.00428335	0.0895	0.887331	FALSE	FALSE	FALSE	CffBSP	206211398	0.909517	0.0376896	TRUE	reported	textfile	2	207076122	0.0198	9.64e-08	14731	GCST90274769.txt	TRUE	reported	textfile	TRUE	0.0019272	28.4406	23.3427
	rs116782490	A	C	A	C	0.2298	-0.0468292	0.9815	0.00354252	FALSE	FALSE	FALSE	CffBSP	85629171	0.81067	0.195478	TRUE	reported	textfile	5	84924989	0.0488	2.49e-06	12633	GCST90274769.txt	TRUE	reported	textfile	TRUE	0.00175223	22.1713	23.3427
	rs11754249	A	G	A	G	0.0934	-0.02578	0.1058	0.900644	FALSE	FALSE	FALSE	CffBSP	144786564	0.509418	0.0390756	TRUE	reported	textfile	6	145107700	0.0205	5.21e-06	11779	GCST90274769.txt	TRUE	reported	textfile	TRUE	0.00175919	20.7545	23.3427
	rs118111688	A	T	A	T	0.1874	-0.127323	0.9776	0.991798	FALSE	TRUE	FALSE	CffBSP	12515011	0.332234	0.131312	TRUE	reported	textfile	7	12554637	0.0424	9.88e-06	13374	GCST90274769.txt	TRUE	reported	textfile	TRUE	0.00145852	19.5318	23.3427
	rs12589600	A	G	A	G	0.051	-0.00574221	0.5556	0.408424	FALSE	FALSE	FALSE	CffBSP	86470484	0.811384	0.0240621	TRUE	reported	textfile	14	86936828	0.0114	7.69e-06	14711	GCST90274769.txt	TRUE	reported	textfile	TRUE	0.00135862	20.0111	23.3427
	rs139902	A	C	A	C	0.0684	0.0121267	0.3659	0.633332	FALSE	FALSE	FALSE	CffBSP	38010775	0.619762	0.0244398	TRUE	reported	textfile	22	38406782	0.0121	1.58e-08	14285	GCST90274769.txt	TRUE	reported	textfile	TRUE	0.00223198	31.9507	23.3427
	rs140404587	T	G	T	G	-0.2617	-0.0868399	0.0119	0.982928	FALSE	FALSE	FALSE	CffBSP	106059641	0.341393	0.0912743	TRUE	reported	textfile	12	106453419	0.0587	8.26e-06	14241	GCST90274769.txt	TRUE	reported	textfile	TRUE	0.00139375	19.8733	23.3427
	rs141430371	A	G	A	G	-0.4948	0.139136	0.9936	0.00143435	FALSE	FALSE	FALSE	CffBSP	29588602	0.655739	0.312101	TRUE	reported	textfile	6	29556379	0.112	9.97e-06	6941	GCST90274769.txt	TRUE	reported	textfile	TRUE	0.00280402	19.5118	23.3427
	rs143400203	T	C	T	C	0.1812	0.00305974	0.0244	0.967784	FALSE	FALSE	FALSE	CffBSP	115920724	0.963965	0.0677259	TRUE	reported	textfile	7	115560778	0.0392	3.79e-06	14722	GCST90274769.txt	TRUE	reported	textfile	TRUE	0.00144926	21.3641	23.3427
	rs145895468	A	AAAATAAATAAAT	T	TTTTA	0.1331	-0.00961467	0.9152	0.0195313	TRUE	FALSE	FALSE	CffBSP	206196391	0.908253	0.08343	TRUE	reported	textfile	2	207061115	0.0241	3.34e-08	10407	GCST90274769.txt	TRUE	reported	textfile	FALSE	0.0029223	30.4957	23.3427
	rs150193318	A	G	A	G	0.2249	0.0738108	0.0212	0.973176	FALSE	FALSE	FALSE	CffBSP	30894548	0.31306	0.0731654	TRUE	reported	textfile	19	31385455	0.0501	7.16e-06	14286	GCST90274769.txt	TRUE	reported	textfile	TRUE	0.00140858	20.1485	23.3427
	rs1514964	T	C	T	C	-0.1263	0.036215	0.9486	0.0404469	FALSE	FALSE	FALSE	CffBSP	64370963	0.556297	0.0615534	TRUE	reported	textfile	1	64836646	0.0264	1.72e-06	14734	GCST90274769.txt	TRUE	reported	textfile	TRUE	0.00155097	22.8844	23.3427
	rs17098842	A	G	A	G	0.1458	-0.0702255	0.9674	0.0191474	FALSE	FALSE	FALSE	CffBSP	76369363	0.428723	0.0887383	TRUE	reported	textfile	1	76835048	0.0321	5.57e-06	14732	GCST90274769.txt	TRUE	reported	textfile	TRUE	0.00139841	20.6275	23.3427
	rs199965585	CT	C	CT	C	0.188	-0.133631	0.0278	0.988232	FALSE	FALSE	FALSE	CffBSP	91733679	0.230091	0.111348	TRUE	reported	textfile	10	93493436	0.0395	1.94e-06	11336	GCST90274769.txt	TRUE	reported	textfile	TRUE	0.00199432	22.6488	23.3427
	rs200181753	T	TG	T	TG	-0.1842	-0.0470734	0.9713	0.0569147	FALSE	FALSE	FALSE	CffBSP	56397875	0.363885	0.0518436	TRUE	reported	textfile	2	56625010	0.039	2.32e-06	11339	GCST90274769.txt	TRUE	reported	textfile	TRUE	0.00196346	22.3035	23.3427
	rs2477954	T	C	T	C	-0.058	-0.0311894	0.6211	0.391628	FALSE	FALSE	FALSE	CffBSP	88504383	0.198939	0.0242799	TRUE	reported	textfile	10	90264140	0.012	1.34e-06	14286	GCST90274769.txt	TRUE	reported	textfile	TRUE	0.00163258	23.3578	23.3427
	rs2631360	A	G	A	G	0.0597	-0.0165515	0.5481	0.344749	FALSE	FALSE	FALSE	CffBSP	132371737	0.50565	0.0248661	TRUE	reported	textfile	5	131707429	0.0128	3.1e-06	11780	GCST90274769.txt	TRUE	reported	textfile	TRUE	0.00184324	21.7498	23.3427
	rs28384995	A	T	A	T	-0.0866	-0.0534277	0.8668	0.87417	FALSE	TRUE	FALSE	CffBSP	90752599	0.138147	0.0360334	TRUE	reported	textfile	15	91295829	0.0194	8.05e-06	14286	GCST90274769.txt	TRUE	reported	textfile	TRUE	0.00139289	19.9238	23.3427
	rs2866626	C	G	C	G	-0.0597	-0.0102335	0.6079	0.603773	FALSE	TRUE	FALSE	CffBSP	101648052	0.672017	0.0241708	TRUE	reported	textfile	4	102569209	0.0121	8.06e-07	14285	GCST90274769.txt	TRUE	reported	textfile	TRUE	0.00170121	24.3398	23.3427
	rs291084	C	G	C	G	0.0638	-0.0281284	0.5279	0.580776	FALSE	TRUE	TRUE	CffBSP	206922278	0.237085	0.0237912	TRUE	reported	textfile	1	207095623	0.0111	9.04e-09	14726	GCST90274769.txt	TRUE	reported	textfile	FALSE	0.0022384	33.0321	23.3427
	rs3064568	C	G	C	G	-0.0585	-0.0160215	0.5068	0.597921	FALSE	TRUE	TRUE	CffBSP	20686983	0.507403	0.0241693	TRUE	reported	textfile	21	22059297	0.0131	7.98e-06	11538	GCST90274769.txt	TRUE	reported	textfile	FALSE	0.0017254	19.9386	23.3427
	rs3823797	A	G	A	G	-0.058	0.0141885	0.7423	0.283258	FALSE	FALSE	FALSE	CffBSP	78065423	0.584374	0.0259384	TRUE	reported	textfile	7	77694740	0.0128	5.86e-06	14732	GCST90274769.txt	TRUE	reported	textfile	TRUE	0.00139178	20.5294	23.3427
	rs4346241	A	G	A	G	0.0907	-0.0173898	0.9021	0.109319	FALSE	FALSE	FALSE	CffBSP	8677291	0.647292	0.0380082	TRUE	reported	textfile	17	8580609	0.0204	8.75e-06	14286	GCST90274769.txt	TRUE	reported	textfile	TRUE	0.00138179	19.7648	23.3427
	rs4866742	T	C	T	C	0.0702	-0.01138	0.4126	0.588575	FALSE	FALSE	FALSE	CffBSP	43405357	0.634702	0.0239519	TRUE	reported	textfile	5	43405459	0.0122	8.71e-09	12829	GCST90274769.txt	TRUE	reported	textfile	TRUE	0.0025742	33.1045	23.3427
	rs55843637	C	G	C	G	0.0549	-0.0040801	0.5287	0.506142	FALSE	TRUE	TRUE	CffBSP	1508222	0.862725	0.0235971	TRUE	reported	textfile	18	1508223	0.0119	3.96e-06	14286	GCST90274769.txt	TRUE	reported	textfile	FALSE	0.00148763	21.2809	23.3427
	rs6580980	A	G	A	G	-0.0688	0.00744255	0.4015	0.678999	FALSE	FALSE	FALSE	CffBSP	54298277	0.768599	0.025297	TRUE	reported	textfile	12	54692061	0.0118	5.53e-09	14285	GCST90274769.txt	TRUE	reported	textfile	TRUE	0.00237411	33.9901	23.3427
	rs6671688	T	C	T	C	0.0534	-0.0309107	0.5411	0.453734	FALSE	FALSE	FALSE	CffBSP	155021789	0.191402	0.0236602	TRUE	reported	textfile	1	154994265	0.0116	4.16e-06	14286	GCST90274769.txt	TRUE	reported	textfile	TRUE	0.00148119	21.1888	23.3427
	rs71363004	C	G	C	G	0.2181	0.0580023	0.9802	0.990987	FALSE	TRUE	FALSE	CffBSP	76467382	0.634384	0.121965	TRUE	reported	textfile	18	74179338	0.0466	2.87e-06	11982	GCST90274769.txt	TRUE	reported	textfile	TRUE	0.00182481	21.9012	23.3427
	rs73000929	A	G	A	G	-0.1935	0.139538	0.0347	0.969738	FALSE	FALSE	FALSE	CffBSP	114082900	0.0472977	0.0703448	TRUE	reported	textfile	11	113953622	0.0355	5.02e-08	14734	GCST90274769.txt	TRUE	reported	textfile	TRUE	0.00201238	29.7061	23.3427
	rs74855027	T	C	T	C	0.1215	0.0208925	0.0639	0.916141	FALSE	FALSE	FALSE	CffBSP	224400654	0.631255	0.0435297	TRUE	reported	textfile	2	225265371	0.0271	7.35e-06	14286	GCST90274769.txt	TRUE	reported	textfile	TRUE	0.00140505	20.098	23.3427
	rs76291845	A	G	A	G	0.2696	-0.0758447	0.9859	0.0148545	FALSE	FALSE	FALSE	CffBSP	111131781	0.428037	0.0956964	TRUE	reported	textfile	2	111889358	0.0542	6.55e-07	14244	GCST90274769.txt	TRUE	reported	textfile	TRUE	0.00173403	24.7389	23.3427
	rs7661151	T	C	T	C	0.0531	0.00187998	0.6323	0.373322	FALSE	FALSE	FALSE	CffBSP	156143924	0.938516	0.0243723	TRUE	reported	textfile	4	157065076	0.0116	4.7e-06	14730	GCST90274769.txt	TRUE	reported	textfile	TRUE	0.00142054	20.9515	23.3427
	rs76669782	A	C	A	C	-0.2853	-0.346095	0.0176	0.998187	FALSE	FALSE	FALSE	CffBSP	87804985	0.176597	0.256119	TRUE	reported	textfile	9	90419900	0.0513	2.68e-08	12933	GCST90274769.txt	TRUE	reported	textfile	TRUE	0.00238579	30.9244	23.3427
	rs76679915	T	C	T	C	0.0624	0.103513	0.7035	0.0339678	FALSE	FALSE	FALSE	CffBSP	124907163	0.106399	0.0641107	TRUE	reported	textfile	4	125828318	0.0137	5.24e-06	11962	GCST90274769.txt	TRUE	reported	textfile	TRUE	0.0017313	20.7422	23.3427
	rs77569365	T	G	T	G	0.129	0.00332226	0.9561	0.0311356	FALSE	FALSE	FALSE	CffBSP	105994991	0.96106	0.0680463	TRUE	reported	textfile	13	106647340	0.0282	4.77e-06	14734	GCST90274769.txt	TRUE	reported	textfile	TRUE	0.00141822	20.9229	23.3427
	rs78552613	T	C	T	C	-0.1844	0.0399052	0.0271	0.978507	FALSE	FALSE	FALSE	CffBSP	103732867	0.621161	0.080746	TRUE	reported	textfile	10	105492625	0.0395	3.04e-06	14734	GCST90274769.txt	TRUE	reported	textfile	TRUE	0.00147695	21.7906	23.3427
	rs78843608	A	G	A	G	-0.1684	0.0052764	0.0376	0.977507	FALSE	FALSE	FALSE	CffBSP	103488646	0.947678	0.0804055	TRUE	reported	textfile	5	102824347	0.0323	1.85e-07	14725	GCST90274769.txt	TRUE	reported	textfile	TRUE	0.00184257	27.1782	23.3427
	rs79205279	A	G	A	G	0.1063	-0.0151195	0.0645	0.932084	FALSE	FALSE	FALSE	CffBSP	125182798	0.748304	0.0471193	TRUE	reported	textfile	3	124901642	0.024	9.46e-06	13854	GCST90274769.txt	TRUE	reported	textfile	TRUE	0.00141402	19.6147	23.3427
	rs7958187	A	G	A	G	-0.055	-0.008651	0.3872	0.658237	FALSE	FALSE	FALSE	CffBSP	69073161	0.72807	0.024881	TRUE	reported	textfile	12	69466941	0.0122	6.54e-06	13420	GCST90274769.txt	TRUE	reported	textfile	TRUE	0.00151215	20.3208	23.3427
	rs801520	A	C	A	C	0.0779	0.0515444	0.1364	0.862411	FALSE	FALSE	FALSE	CffBSP	18662599	0.133146	0.0343216	TRUE	reported	textfile	7	18702222	0.0171	5.22e-06	14732	GCST90274769.txt	TRUE	reported	textfile	TRUE	0.00140673	20.7503	23.3427
	rs80328354	A	T	A	T	-0.2841	-0.00387962	0.9884	0.990883	FALSE	TRUE	FALSE	CffBSP	55277092	0.974589	0.121798	TRUE	reported	textfile	12	55670876	0.0599	2.11e-06	14734	GCST90274769.txt	TRUE	reported	textfile	TRUE	0.00152442	22.4921	23.3427
GCST90274770	rs10990301	A	T	A	T	0.085	0.0355038	0.8839	0.890897	FALSE	TRUE	FALSE	CffBSP	102765765	0.357269	0.0385666	TRUE	reported	textfile	9	105528047	0.0186	4.88e-06	14296	GCST90274770.txt	TRUE	reported	textfile	TRUE	0.00145869	20.881	72.1398
	rs111476793	A	G	A	G	0.0869	0.0691241	0.1344	0.895175	FALSE	FALSE	FALSE	CffBSP	53085329	0.0712066	0.0383139	TRUE	reported	textfile	4	53951496	0.019	4.79e-06	12800	GCST90274770.txt	TRUE	reported	textfile	TRUE	0.0016316	20.9153	72.1398
	rs112315344	T	G	T	G	0.2123	0.0929154	0.0284	0.987745	FALSE	FALSE	FALSE	CffBSP	33775688	0.396904	0.109678	TRUE	reported	textfile	5	33775793	0.0455	3.07e-06	14255	GCST90274770.txt	TRUE	reported	textfile	TRUE	0.00152492	21.7679	72.1398
	rs112356872	T	C	T	C	-0.2165	-0.0222047	0.9805	0.0228137	FALSE	FALSE	FALSE	CffBSP	22172491	0.776682	0.0782828	TRUE	reported	textfile	7	22212109	0.0478	5.92e-06	14743	GCST90274770.txt	TRUE	reported	textfile	TRUE	0.00138954	20.5117	72.1398
	rs112846979	T	C	T	C	-0.188	-0.0311688	0.0228	0.991636	FALSE	FALSE	FALSE	CffBSP	191115053	0.807748	0.128092	TRUE	reported	textfile	3	190832842	0.0414	5.6e-06	14296	GCST90274770.txt	TRUE	reported	textfile	TRUE	0.00144037	20.6184	72.1398
	rs113010081	T	C	T	C	-0.5767	-0.00103751	0.8759	0.127865	FALSE	FALSE	FALSE	CffBSP	46415921	0.976619	0.0353998	TRUE	reported	textfile	3	46457412	0.0184	1.24e-215	14296	GCST90274770.txt	TRUE	reported	textfile	TRUE	0.0642966	982.208	72.1398
	rs1161092	A	G	A	G	-0.0635	0.024873	0.6742	0.369809	FALSE	FALSE	FALSE	CffBSP	67328232	0.30596	0.0242963	TRUE	reported	textfile	12	67722012	0.0125	3.77e-07	14296	GCST90274770.txt	TRUE	reported	textfile	TRUE	0.0018019	25.8028	72.1398
	rs116193969	A	T	A	T	0.2915	-0.126843	0.0134	0.0169756	FALSE	TRUE	FALSE	CffBSP	236065768	0.161908	0.0906876	TRUE	reported	textfile	2	236974412	0.0617	2.31e-06	14296	GCST90274770.txt	TRUE	reported	textfile	TRUE	0.00155889	22.3175	72.1398
	rs11619402	A	G	A	G	0.0672	-0.0653363	0.7907	0.149308	FALSE	FALSE	FALSE	CffBSP	42981551	0.04782	0.0330154	TRUE	reported	textfile	13	43555687	0.015	7.46e-06	14296	GCST90274770.txt	TRUE	reported	textfile	TRUE	0.00140195	20.0676	72.1398
	rs116309267	C	G	C	G	0.1956	0.0538201	0.0299	0.0414478	FALSE	TRUE	FALSE	CffBSP	714433	0.361989	0.0590403	TRUE	reported	textfile	3	756117	0.0405	1.37e-06	14723	GCST90274770.txt	TRUE	reported	textfile	TRUE	0.00158177	23.3222	72.1398
	rs13100427	A	G	A	G	0.0533	-0.00191893	0.56	0.438751	FALSE	FALSE	FALSE	CffBSP	22417149	0.93546	0.0236973	TRUE	reported	textfile	3	22458640	0.012	8.93e-06	14296	GCST90274770.txt	TRUE	reported	textfile	TRUE	0.00137809	19.7256	72.1398
	rs137896358	T	C	T	C	0.2797	-0.0686685	0.0186	0.982656	FALSE	FALSE	FALSE	CffBSP	18807099	0.451408	0.0911847	TRUE	reported	textfile	19	18917908	0.0551	3.85e-07	12745	GCST90274770.txt	TRUE	reported	textfile	TRUE	0.00201774	25.764	72.1398
	rs140505982	T	C	T	C	-0.2294	-0.0916181	0.0248	0.990339	FALSE	FALSE	FALSE	CffBSP	46418258	0.427016	0.115343	TRUE	reported	textfile	3	46459749	0.0415	3.24e-08	13865	GCST90274770.txt	TRUE	reported	textfile	TRUE	0.00219895	30.5512	72.1398
	rs143922263	A	G	A	G	0.2198	-0.0381282	0.0203	0.982715	FALSE	FALSE	FALSE	CffBSP	161383711	0.673859	0.0905965	TRUE	reported	textfile	2	162240222	0.0497	9.75e-06	14296	GCST90274770.txt	TRUE	reported	textfile	TRUE	0.00136626	19.5561	72.1398
	rs143960014	A	G	A	G	0.1953	-0.0261109	0.0228	0.996502	FALSE	FALSE	FALSE	CffBSP	51891306	0.895109	0.198046	TRUE	reported	textfile	12	52285090	0.0416	2.67e-06	14257	GCST90274770.txt	TRUE	reported	textfile	TRUE	0.00154354	22.0372	72.1398
	rs148518028	T	C	T	C	0.1989	0.143785	0.0317	0.976935	FALSE	FALSE	FALSE	CffBSP	79241934	0.0724219	0.0800383	TRUE	reported	textfile	2	79469060	0.044	6.17e-06	14296	GCST90274770.txt	TRUE	reported	textfile	TRUE	0.00142735	20.4317	72.1398
	rs1634503	A	G	A	G	-0.0745	0.0735622	0.2416	0.821052	FALSE	FALSE	FALSE	CffBSP	36093791	0.0173185	0.0309101	TRUE	reported	textfile	17	34421139	0.0138	6.72e-08	14295	GCST90274770.txt	TRUE	reported	textfile	TRUE	0.00203463	29.1403	72.1398
	rs17692864	T	C	T	C	0.2321	0.105322	0.9406	0.0473936	FALSE	FALSE	FALSE	CffBSP	36588784	0.0602393	0.0560508	TRUE	reported	textfile	17	34945214	0.0283	2.38e-16	13662	GCST90274770.txt	TRUE	reported	textfile	TRUE	0.00489926	67.2533	72.1398
	rs17792183	T	C	T	C	0.0763	-0.00523864	0.8565	0.124252	FALSE	FALSE	FALSE	CffBSP	22899319	0.882653	0.0354905	TRUE	reported	textfile	6	22899548	0.017	7.18e-06	14296	GCST90274770.txt	TRUE	reported	textfile	TRUE	0.0014071	20.1414	72.1398
	rs183450854	C	G	C	G	0.2133	0.0439049	0.9802	0.978617	FALSE	TRUE	FALSE	CffBSP	51756208	0.589234	0.0813135	TRUE	reported	textfile	20	50372747	0.0475	7.1e-06	14737	GCST90274770.txt	TRUE	reported	textfile	TRUE	0.00136644	20.1621	72.1398
	rs200664920	T	TA	T	TA	0.1906	-0.197588	0.965	0.0307134	FALSE	FALSE	FALSE	CffBSP	30454604	0.00540518	0.0710279	TRUE	reported	textfile	11	30476151	0.0364	1.64e-07	11342	GCST90274770.txt	TRUE	reported	textfile	TRUE	0.0024116	27.4136	72.1398
	rs3860989	A	C	A	C	-0.0631	-0.00891868	0.6988	0.376636	FALSE	FALSE	FALSE	CffBSP	33460143	0.715553	0.0244744	TRUE	reported	textfile	9	33460141	0.0142	8.84e-06	11984	GCST90274770.txt	TRUE	reported	textfile	TRUE	0.001645	19.7428	72.1398
	rs42279	T	C	T	C	0.0743	0.0213877	0.1598	0.849315	FALSE	FALSE	FALSE	CffBSP	11317586	0.519154	0.0331772	TRUE	reported	textfile	5	11317698	0.0162	4.51e-06	14738	GCST90274770.txt	TRUE	reported	textfile	TRUE	0.00142525	21.0324	72.1398
	rs56131468	A	G	A	G	0.0833	0.0160667	0.1323	0.824013	FALSE	FALSE	FALSE	CffBSP	130917874	0.607472	0.0312772	TRUE	reported	textfile	10	132716137	0.0178	2.87e-06	14296	GCST90274770.txt	TRUE	reported	textfile	TRUE	0.00152957	21.8972	72.1398
	rs5743614	T	C	T	C	0.0728	-0.0202984	0.2565	0.869962	FALSE	FALSE	FALSE	CffBSP	38797314	0.561136	0.0349276	TRUE	reported	textfile	4	38798935	0.0143	3.56e-07	12859	GCST90274770.txt	TRUE	reported	textfile	TRUE	0.00201145	25.9133	72.1398
	rs6100282	A	G	A	G	-0.0715	0.0154901	0.198	0.839237	FALSE	FALSE	FALSE	CffBSP	58932830	0.626139	0.0317962	TRUE	reported	textfile	20	57507885	0.0159	6.9e-06	12799	GCST90274770.txt	TRUE	reported	textfile	TRUE	0.00157745	20.2185	72.1398
	rs66822987	T	C	T	C	0.0648	0.0266497	0.2289	0.765363	FALSE	FALSE	FALSE	CffBSP	63120741	0.337093	0.0277623	TRUE	reported	textfile	3	63106417	0.0146	9.06e-06	14296	GCST90274770.txt	TRUE	reported	textfile	TRUE	0.00137604	19.6962	72.1398
	rs72800563	T	G	T	G	-0.1765	-0.0960829	0.9693	0.00957221	FALSE	FALSE	FALSE	CffBSP	79304562	0.413273	0.11744	TRUE	reported	textfile	16	79338459	0.0374	2.37e-06	14741	GCST90274770.txt	TRUE	reported	textfile	TRUE	0.00150856	22.2683	72.1398
	rs78044056	A	G	A	G	-0.2607	0.00943647	0.0138	0.991849	FALSE	FALSE	FALSE	CffBSP	156134452	0.941937	0.129558	TRUE	reported	textfile	4	157055604	0.0552	2.33e-06	13809	GCST90274770.txt	TRUE	reported	textfile	TRUE	0.00161265	22.3019	72.1398
	rs8064426	A	G	A	G	-0.4104	-0.0141223	0.1459	0.782833	FALSE	FALSE	FALSE	CffBSP	36463908	0.621431	0.0285979	TRUE	reported	textfile	17	34819750	0.0173	2.11e-124	14295	GCST90274770.txt	TRUE	reported	textfile	TRUE	0.0378764	562.68	72.1398
	rs9818901	A	T	A	T	-0.1185	-0.0259957	0.9445	0.945134	FALSE	TRUE	FALSE	CffBSP	153059223	0.619049	0.0522844	TRUE	reported	textfile	3	152777012	0.0265	7.76e-06	14742	GCST90274770.txt	TRUE	reported	textfile	TRUE	0.00135457	19.9934	72.1398
GCST90274771	rs10903115	A	G	A	G	-0.0559	-0.0470392	0.4429	0.554363	FALSE	FALSE	FALSE	CffBSP	24935205	0.0471444	0.0236974	TRUE	reported	textfile	1	25261696	0.0122	4.61e-06	14286	GCST90274771.txt	TRUE	reported	textfile	TRUE	0.00146742	20.9915	34.1481
	rs10992054	T	C	T	C	-0.3705	0.0332066	0.9873	0.00673472	FALSE	FALSE	FALSE	CffBSP	90094360	0.827922	0.152767	TRUE	reported	textfile	9	92856642	0.0763	1.2e-06	12304	GCST90274771.txt	TRUE	reported	textfile	TRUE	0.00191271	23.5753	34.1481
	rs11020961	A	G	A	G	0.0768	0.0177271	0.8167	0.223168	FALSE	FALSE	FALSE	CffBSP	94842443	0.531453	0.0283277	TRUE	reported	textfile	11	94575608	0.0161	1.84e-06	14287	GCST90274771.txt	TRUE	reported	textfile	TRUE	0.00159015	22.7515	34.1481
	rs11220506	A	G	A	G	-0.0702	-0.0458045	0.1876	0.740698	FALSE	FALSE	FALSE	CffBSP	126465434	0.0907361	0.0270789	TRUE	reported	textfile	11	126335329	0.0147	1.79e-06	14729	GCST90274771.txt	TRUE	reported	textfile	TRUE	0.00154595	22.8024	34.1481
	rs11265488	A	G	A	G	-0.0624	0.0561234	0.4675	0.558593	FALSE	FALSE	FALSE	CffBSP	160804167	0.018002	0.0237251	TRUE	reported	textfile	1	160773957	0.0118	1.24e-07	14287	GCST90274771.txt	TRUE	reported	textfile	TRUE	0.00195351	27.9605	34.1481
	rs11265493	A	G	A	G	0.2122	0.0220447	0.4066	0.603975	FALSE	FALSE	FALSE	CffBSP	160834012	0.361249	0.0241457	TRUE	reported	textfile	1	160803802	0.0119	3.99e-71	14287	GCST90274771.txt	TRUE	reported	textfile	TRUE	0.0217719	317.933	34.1481
	rs113798825	T	C	T	C	-0.3154	0.052626	0.9868	0.00656008	FALSE	FALSE	FALSE	CffBSP	233296006	0.719782	0.146693	TRUE	reported	textfile	1	233431752	0.0695	5.68e-06	11273	GCST90274771.txt	TRUE	reported	textfile	TRUE	0.00182357	20.591	34.1481
	rs114344979	T	C	T	C	0.1066	0.00109916	0.0652	0.91156	FALSE	FALSE	FALSE	CffBSP	48867376	0.979043	0.041844	TRUE	reported	textfile	2	49094515	0.024	8.93e-06	14724	GCST90274771.txt	TRUE	reported	textfile	TRUE	0.00133809	19.7257	34.1481
	rs114758826	A	G	A	G	-0.1804	0.0959691	0.0393	0.965271	FALSE	FALSE	FALSE	CffBSP	173609464	0.140227	0.0650662	TRUE	reported	textfile	4	174530615	0.0337	8.65e-08	14728	GCST90274771.txt	TRUE	reported	textfile	TRUE	0.00194189	28.652	34.1481
	rs139924614	A	G	A	G	0.1618	0.235167	0.9666	0.00810825	FALSE	FALSE	FALSE	CffBSP	16733115	0.0656432	0.127749	TRUE	reported	textfile	22	17214005	0.0348	3.33e-06	14725	GCST90274771.txt	TRUE	reported	textfile	TRUE	0.00146591	21.6142	34.1481
	rs140189694	A	T	A	T	0.2783	-0.125245	0.9887	0.995152	FALSE	TRUE	FALSE	CffBSP	113706982	0.460668	0.169767	TRUE	reported	textfile	5	113042679	0.0621	7.41e-06	12934	GCST90274771.txt	TRUE	reported	textfile	TRUE	0.00155037	20.0806	34.1481
	rs1434219	T	C	T	C	-0.0589	-0.0138483	0.4388	0.567578	FALSE	FALSE	FALSE	CffBSP	79327430	0.560942	0.0238171	TRUE	reported	textfile	2	79554556	0.0123	1.68e-06	14287	GCST90274771.txt	TRUE	reported	textfile	TRUE	0.00160244	22.9277	34.1481
	rs145111742	T	C	T	C	0.3046	0.0989916	0.0304	0.984046	FALSE	FALSE	FALSE	CffBSP	126794993	0.2987	0.0952552	TRUE	reported	textfile	9	129557272	0.0689	9.83e-06	12304	GCST90274771.txt	TRUE	reported	textfile	TRUE	0.00158594	19.5412	34.1481
	rs145175118	T	C	T	C	0.2308	0.0437425	0.9818	0.0179367	FALSE	FALSE	FALSE	CffBSP	91914841	0.619356	0.0880547	TRUE	reported	textfile	8	92927069	0.052	9.06e-06	14287	GCST90274771.txt	TRUE	reported	textfile	TRUE	0.00137697	19.6972	34.1481
	rs147033439	A	G	A	G	0.2053	0.120777	0.0249	0.98572	FALSE	FALSE	FALSE	CffBSP	88211646	0.216536	0.0977328	TRUE	reported	textfile	1	88677329	0.0411	5.88e-07	14731	GCST90274771.txt	TRUE	reported	textfile	TRUE	0.00169094	24.948	34.1481
	rs148214660	A	G	A	G	-0.2705	0.0604983	0.0131	0.981549	FALSE	FALSE	FALSE	CffBSP	112870611	0.492981	0.0882444	TRUE	reported	textfile	3	112589458	0.0612	9.87e-06	14287	GCST90274771.txt	TRUE	reported	textfile	TRUE	0.00136552	19.5331	34.1481
	rs149212182	T	C	T	C	0.2642	-0.00220533	0.0173	0.986205	FALSE	FALSE	FALSE	CffBSP	61708568	0.982784	0.102197	TRUE	reported	textfile	20	60283624	0.059	7.54e-06	12321	GCST90274771.txt	TRUE	reported	textfile	TRUE	0.00162484	20.0489	34.1481
	rs149458216	A	C	A	C	-0.2146	0.0149121	0.0182	0.984617	FALSE	FALSE	FALSE	CffBSP	48868382	0.872709	0.093074	TRUE	reported	textfile	16	48902293	0.047	4.97e-06	14725	GCST90274771.txt	TRUE	reported	textfile	TRUE	0.00141382	20.8451	34.1481
	rs149826608	A	G	A	G	-0.3587	0.134446	0.007	0.988699	FALSE	FALSE	FALSE	CffBSP	109594851	0.228471	0.111638	TRUE	reported	textfile	7	109234908	0.0807	8.8e-06	13156	GCST90274771.txt	TRUE	reported	textfile	TRUE	0.00149948	19.7538	34.1481
	rs1574847	C	G	C	G	-0.0637	0.0359253	0.2366	0.255001	FALSE	TRUE	FALSE	CffBSP	27610137	0.185944	0.0271612	TRUE	reported	textfile	4	27611759	0.0139	4.59e-06	14287	GCST90274771.txt	TRUE	reported	textfile	TRUE	0.00146781	20.9985	34.1481
	rs2554697	A	G	A	G	0.0627	-0.0178021	0.6347	0.334262	FALSE	FALSE	FALSE	CffBSP	4064283	0.476767	0.02502	TRUE	reported	textfile	8	3921805	0.0134	2.88e-06	11782	GCST90274771.txt	TRUE	reported	textfile	TRUE	0.00185481	21.8903	34.1481
	rs3184504	T	C	T	C	0.116	-0.0492341	0.4764	0.592991	FALSE	FALSE	FALSE	CffBSP	111446804	0.0402763	0.0240061	TRUE	reported	textfile	12	111884608	0.0128	1.27e-19	11784	GCST90274771.txt	TRUE	reported	textfile	TRUE	0.00692129	82.115	34.1481
	rs34826779	T	G	T	G	0.063	0.0207505	0.248	0.781718	FALSE	FALSE	FALSE	CffBSP	105558736	0.467836	0.0285818	TRUE	reported	textfile	8	106570964	0.0138	4.99e-06	14287	GCST90274771.txt	TRUE	reported	textfile	TRUE	0.00145663	20.8383	34.1481
	rs3828139	T	C	T	C	0.0744	-0.0182978	0.4677	0.482961	FALSE	FALSE	FALSE	CffBSP	43787344	0.438676	0.0236274	TRUE	reported	textfile	1	44253015	0.0119	4.05e-10	14286	GCST90274771.txt	TRUE	reported	textfile	TRUE	0.00272869	39.0833	34.1481
	rs4672486	A	G	A	G	0.0661	0.0154726	0.4329	0.549625	FALSE	FALSE	FALSE	CffBSP	62268074	0.51314	0.02366	TRUE	reported	textfile	2	62495209	0.0117	1.61e-08	14720	GCST90274771.txt	TRUE	reported	textfile	TRUE	0.00216363	31.9133	34.1481
	rs56272634	T	C	T	C	0.0704	-0.0232324	0.6994	0.290466	FALSE	FALSE	FALSE	CffBSP	111088491	0.371227	0.0259818	TRUE	reported	textfile	2	111846068	0.0126	2.31e-08	14729	GCST90274771.txt	TRUE	reported	textfile	TRUE	0.00211501	31.2137	34.1481
	rs60006581	A	G	A	G	0.0905	-0.0656184	0.9052	0.056607	FALSE	FALSE	FALSE	CffBSP	36771774	0.198704	0.0510548	TRUE	reported	textfile	21	38144075	0.0203	8.27e-06	14724	GCST90274771.txt	TRUE	reported	textfile	TRUE	0.00134801	19.8722	34.1481
	rs61865960	T	C	T	C	0.2604	0.00182476	0.9697	0.0423593	FALSE	FALSE	FALSE	CffBSP	93902651	0.975294	0.0589227	TRUE	reported	textfile	10	95662408	0.0584	8.24e-06	11810	GCST90274771.txt	TRUE	reported	textfile	TRUE	0.00168064	19.8785	34.1481
	rs6928352	A	G	A	G	-0.1074	-0.00436615	0.0794	0.918708	FALSE	FALSE	FALSE	CffBSP	614064	0.918295	0.0425628	TRUE	reported	textfile	6	614064	0.0215	5.87e-07	14731	GCST90274771.txt	TRUE	reported	textfile	TRUE	0.00169108	24.9501	34.1481
	rs72756898	C	G	C	G	0.2056	-0.0198708	0.0192	0.0279651	FALSE	TRUE	FALSE	CffBSP	64889868	0.779875	0.0710988	TRUE	reported	textfile	5	64185695	0.0454	5.94e-06	14734	GCST90274771.txt	TRUE	reported	textfile	TRUE	0.00138998	20.5057	34.1481
	rs72837690	T	C	T	C	-0.0776	0.00350257	0.6405	0.423059	FALSE	FALSE	FALSE	CffBSP	7185104	0.883455	0.0238936	TRUE	reported	textfile	17	7088423	0.0125	5.37e-10	14287	GCST90274771.txt	TRUE	reported	textfile	TRUE	0.00269025	38.5339	34.1481
	rs73173072	A	T	A	T	0.1576	-0.0100589	0.9675	0.937194	FALSE	TRUE	FALSE	CffBSP	167795964	0.836424	0.0487188	TRUE	reported	textfile	3	167513752	0.0353	8.02e-06	14718	GCST90274771.txt	TRUE	reported	textfile	TRUE	0.00135247	19.9298	34.1481
	rs78142752	T	C	T	C	0.2288	0.168518	0.0184	0.975547	FALSE	FALSE	FALSE	CffBSP	96742838	0.0245335	0.0749412	TRUE	reported	textfile	5	96078542	0.0497	4.15e-06	14734	GCST90274771.txt	TRUE	reported	textfile	TRUE	0.00143633	21.1905	34.1481
GCST90274772	rs117191103	T	C	T	C	0.3553	0.077652	0.0208	0.972248	FALSE	FALSE	FALSE	CffBSP	45835717	0.274583	0.0710729	TRUE	reported	textfile	20	44464356	0.0437	4.28e-16	14736	GCST90274772.txt	TRUE	reported	textfile	TRUE	0.00446585	66.095	78.1331
	rs11755766	T	C	T	C	-0.0504	-0.0316861	0.5049	0.503938	FALSE	FALSE	FALSE	CffBSP	10178718	0.180531	0.0236618	TRUE	reported	textfile	6	10178951	0.0112	6.8e-06	14735	GCST90274772.txt	TRUE	reported	textfile	TRUE	0.00137239	20.2473	78.1331
	rs12152184	A	G	A	G	0.1085	0.00164347	0.8849	0.114332	FALSE	FALSE	FALSE	CffBSP	44606929	0.964884	0.0373297	TRUE	reported	textfile	22	45002809	0.0205	1.21e-07	12402	GCST90274772.txt	TRUE	reported	textfile	TRUE	0.00225362	28.008	78.1331
	rs12500563	T	G	T	G	0.3143	0.0153308	0.9875	0.00239969	FALSE	FALSE	FALSE	CffBSP	7302699	0.94763	0.233404	TRUE	reported	textfile	4	7304426	0.0687	4.76e-06	10795	GCST90274772.txt	TRUE	reported	textfile	TRUE	0.00193514	20.9264	78.1331
	rs138897138	A	G	A	G	0.109	-0.0640465	0.914	0.0847862	FALSE	FALSE	FALSE	CffBSP	121973851	0.127203	0.0419916	TRUE	reported	textfile	2	122731427	0.0216	4.5e-07	14288	GCST90274772.txt	TRUE	reported	textfile	TRUE	0.0017791	25.4615	78.1331
	rs144949926	A	G	A	G	-0.2655	-0.00993528	0.9784	0.0249273	FALSE	FALSE	FALSE	CffBSP	20879989	0.89821	0.0776658	TRUE	reported	textfile	3	20921481	0.0591	7.04e-06	14288	GCST90274772.txt	TRUE	reported	textfile	TRUE	0.00141049	20.1787	78.1331
	rs149900704	A	G	A	G	-0.1956	-0.0678771	0.0203	0.989386	FALSE	FALSE	FALSE	CffBSP	110786887	0.546346	0.11252	TRUE	reported	textfile	8	111799116	0.0442	9.63e-06	14732	GCST90274772.txt	TRUE	reported	textfile	TRUE	0.00132756	19.581	78.1331
	rs17372980	T	C	T	C	-0.0611	0.0152167	0.7421	0.242421	FALSE	FALSE	FALSE	CffBSP	58674619	0.578961	0.0274223	TRUE	reported	textfile	1	59140291	0.0134	5.12e-06	14288	GCST90274772.txt	TRUE	reported	textfile	TRUE	0.00145301	20.788	78.1331
	rs187640246	T	C	G	C	-0.2717	-0.736359	0.0134	0.000374009	TRUE	FALSE	FALSE	CffBSP	31419492	0.21664	0.595994	TRUE	reported	textfile	20	30007295	0.0604	6.85e-06	12792	GCST90274772.txt	TRUE	reported	textfile	FALSE	0.00157936	20.2319	78.1331
	rs1883832	T	C	T	C	-0.4519	-0.0691545	0.2575	0.729464	FALSE	FALSE	FALSE	CffBSP	46118343	0.00852354	0.0262885	TRUE	reported	textfile	20	44746982	0.0126	1.07e-281	14736	GCST90274772.txt	TRUE	reported	textfile	TRUE	0.0802821	1286.13	78.1331
	rs34755276	A	G	A	G	0.0587	-0.025149	0.3475	0.649749	FALSE	FALSE	FALSE	CffBSP	57244454	0.308623	0.0247015	TRUE	reported	textfile	19	57755822	0.0131	7.43e-06	12403	GCST90274772.txt	TRUE	reported	textfile	TRUE	0.00161623	20.0754	78.1331
	rs35864161	T	G	T	G	-0.1269	0.0411033	0.9543	0.0343799	FALSE	FALSE	FALSE	CffBSP	68369014	0.519034	0.0637422	TRUE	reported	textfile	17	66365155	0.0284	7.88e-06	14735	GCST90274772.txt	TRUE	reported	textfile	TRUE	0.00135316	19.9631	78.1331
	rs3967170	A	G	A	G	0.0789	0.023852	0.1353	0.84124	FALSE	FALSE	FALSE	CffBSP	3731754	0.462188	0.0324408	TRUE	reported	textfile	3	3773438	0.017	3.46e-06	14721	GCST90274772.txt	TRUE	reported	textfile	TRUE	0.00146111	21.5376	78.1331
	rs404842	A	G	A	G	-0.0599	-0.0305966	0.6433	0.40445	FALSE	FALSE	FALSE	CffBSP	84270507	0.201427	0.0239504	TRUE	reported	textfile	16	84304113	0.0123	1.12e-06	14287	GCST90274772.txt	TRUE	reported	textfile	TRUE	0.00165723	23.7128	78.1331
	rs4278412	C	G	C	G	0.1978	-0.0122947	0.0203	0.039567	FALSE	TRUE	FALSE	CffBSP	211276815	0.838616	0.0603677	TRUE	reported	textfile	1	211450157	0.0413	1.67e-06	14725	GCST90274772.txt	TRUE	reported	textfile	TRUE	0.00155533	22.9347	78.1331
	rs4664334	T	C	T	C	0.0541	-0.0120475	0.5003	0.515995	FALSE	FALSE	FALSE	CffBSP	160512394	0.610451	0.0236489	TRUE	reported	textfile	2	161368905	0.0118	4.55e-06	14288	GCST90274772.txt	TRUE	reported	textfile	TRUE	0.001469	21.017	78.1331
	rs7250371	T	C	T	C	0.0686	-0.0313171	0.3648	0.687917	FALSE	FALSE	FALSE	CffBSP	57349717	0.216993	0.0253669	TRUE	reported	textfile	19	57861085	0.0116	3.34e-09	14722	GCST90274772.txt	TRUE	reported	textfile	TRUE	0.00236993	34.9682	78.1331
	rs73128569	A	T	A	T	-0.1788	-0.0213707	0.9406	0.943948	FALSE	TRUE	FALSE	CffBSP	45977807	0.675913	0.0511205	TRUE	reported	textfile	20	44606446	0.0268	2.53e-11	14288	GCST90274772.txt	TRUE	reported	textfile	TRUE	0.00310558	44.5046	78.1331
	rs74794857	T	C	T	C	0.0707	-0.0293354	0.4128	0.624376	FALSE	FALSE	FALSE	CffBSP	22143479	0.231037	0.0244933	TRUE	reported	textfile	5	22143588	0.0138	3e-07	11760	GCST90274772.txt	TRUE	reported	textfile	TRUE	0.00222692	26.2426	78.1331
	rs75626299	C	G	C	G	0.1458	-0.0275978	0.9638	0.968284	FALSE	TRUE	FALSE	CffBSP	29426601	0.682562	0.0674811	TRUE	reported	textfile	9	29426599	0.0316	3.95e-06	14728	GCST90274772.txt	TRUE	reported	textfile	TRUE	0.00144334	21.2854	78.1331
	rs7798473	A	C	A	C	-0.1041	0.0510101	0.0609	0.950721	FALSE	FALSE	FALSE	CffBSP	108903330	0.348757	0.0544396	TRUE	reported	textfile	7	108543387	0.0235	9.43e-06	14734	GCST90274772.txt	TRUE	reported	textfile	TRUE	0.00133005	19.6204	78.1331
	rs8024256	A	G	A	G	-0.0562	0.024852	0.3092	0.70666	FALSE	FALSE	FALSE	CffBSP	26584374	0.336248	0.0258443	TRUE	reported	textfile	15	26829521	0.0121	3.41e-06	14736	GCST90274772.txt	TRUE	reported	textfile	TRUE	0.0014618	21.5696	78.1331
	rs9526031	A	C	A	C	0.064	-0.0197528	0.4882	0.406949	FALSE	FALSE	FALSE	CffBSP	45020932	0.411281	0.0240407	TRUE	reported	textfile	13	45595067	0.012	9.64e-08	14288	GCST90274772.txt	TRUE	reported	textfile	TRUE	0.00198684	28.4405	78.1331
	rs9993874	A	G	A	G	-0.0582	0.0251433	0.4883	0.513739	FALSE	FALSE	FALSE	CffBSP	54180557	0.285749	0.0235536	TRUE	reported	textfile	4	55046724	0.0125	3.22e-06	12403	GCST90274772.txt	TRUE	reported	textfile	TRUE	0.00174478	21.6748	78.1331
GCST90274773	rs11622090	T	C	T	C	-0.0588	-0.00682927	0.3206	0.741894	FALSE	FALSE	FALSE	CffBSP	92863347	0.800157	0.0269778	TRUE	reported	textfile	14	93329692	0.0128	4.35e-06	13236	GCST90274773.txt	TRUE	reported	textfile	TRUE	0.00159179	21.0994	31.4825
	rs117276991	A	G	A	G	-0.1261	-0.0215991	0.0751	0.903869	FALSE	FALSE	FALSE	CffBSP	6209728	0.596107	0.0407524	TRUE	reported	textfile	10	6251691	0.0256	8.4e-07	14287	GCST90274773.txt	TRUE	reported	textfile	TRUE	0.0016954	24.2599	31.4825
	rs117516652	A	G	A	G	0.2374	-0.0323004	0.9826	0.0162603	FALSE	FALSE	FALSE	CffBSP	38429186	0.737508	0.0963748	TRUE	reported	textfile	13	39003323	0.0476	6.12e-07	14248	GCST90274773.txt	TRUE	reported	textfile	TRUE	0.00174275	24.8706	31.4825
	rs12416520	A	G	A	G	-0.0629	0.0206435	0.7492	0.216047	FALSE	FALSE	FALSE	CffBSP	69452189	0.471564	0.0286741	TRUE	reported	textfile	10	71211945	0.0132	1.89e-06	14709	GCST90274773.txt	TRUE	reported	textfile	TRUE	0.00154135	22.7036	31.4825
	rs1259355	A	G	A	G	0.0569	-0.0269125	0.4361	0.625968	FALSE	FALSE	FALSE	CffBSP	31535601	0.267433	0.0242675	TRUE	reported	textfile	12	31688535	0.0119	1.74e-06	14287	GCST90274773.txt	TRUE	reported	textfile	TRUE	0.0015977	22.8597	31.4825
	rs13010492	C	G	C	G	-0.0589	0.015577	0.4754	0.365681	FALSE	TRUE	TRUE	CffBSP	203911453	0.522283	0.0243456	TRUE	reported	textfile	2	204776176	0.0122	1.38e-06	13421	GCST90274773.txt	TRUE	reported	textfile	FALSE	0.00173369	23.3048	31.4825
	rs141298297	G	GT	G	GT	0.1034	-0.0133863	0.8877	0.154573	FALSE	FALSE	FALSE	CffBSP	17157236	0.680508	0.0325092	TRUE	reported	textfile	5	17157345	0.0232	8.32e-06	10894	GCST90274773.txt	TRUE	reported	textfile	TRUE	0.00182006	19.8603	31.4825
	rs16541	A	G	A	G	-0.0679	0.0211545	0.7871	0.1405	FALSE	FALSE	FALSE	CffBSP	39208885	0.531965	0.0338467	TRUE	reported	textfile	17	37365138	0.015	5.99e-06	14287	GCST90274773.txt	TRUE	reported	textfile	TRUE	0.00143217	20.4878	31.4825
	rs17345759	A	C	A	C	-0.1134	-0.0272255	0.9301	0.0656211	FALSE	FALSE	FALSE	CffBSP	97870098	0.565599	0.0473863	TRUE	reported	textfile	7	97499410	0.0245	3.68e-06	14287	GCST90274773.txt	TRUE	reported	textfile	TRUE	0.00149728	21.4207	31.4825
	rs17769062	T	C	T	C	0.1638	0.0667418	0.9589	0.0284716	FALSE	FALSE	FALSE	CffBSP	27496606	0.340459	0.0700144	TRUE	reported	textfile	9	27496604	0.0334	9.38e-07	14287	GCST90274773.txt	TRUE	reported	textfile	TRUE	0.0016806	24.0477	31.4825
	rs192582121	A	T	A	T	-0.4169	-0.105798	0.9916	0.997043	FALSE	TRUE	FALSE	CffBSP	102852387	0.613132	0.209249	TRUE	reported	textfile	9	105614669	0.0806	2.31e-07	11438	GCST90274773.txt	TRUE	reported	textfile	TRUE	0.00233361	26.7496	31.4825
	rs193245191	A	G	A	G	-0.3109	-0.169762	0.0109	0.998868	FALSE	FALSE	FALSE	CffBSP	102853294	0.634894	0.357507	TRUE	reported	textfile	11	102724025	0.0696	7.93e-06	12290	GCST90274773.txt	TRUE	reported	textfile	TRUE	0.00162094	19.9504	31.4825
	rs2237450	T	C	T	C	0.0623	-0.0466896	0.6389	0.351926	FALSE	FALSE	FALSE	CffBSP	50648320	0.0576687	0.0245966	TRUE	reported	textfile	7	50716017	0.0124	5.06e-07	14287	GCST90274773.txt	TRUE	reported	textfile	TRUE	0.0017637	25.239	31.4825
	rs3104373	T	C	T	C	0.0973	-0.0698823	0.1469	0.862185	FALSE	FALSE	FALSE	CffBSP	32632598	0.0404371	0.0341013	TRUE	reported	textfile	6	32600375	0.0165	3.7e-09	14735	GCST90274773.txt	TRUE	reported	textfile	TRUE	0.00235442	34.7695	31.4825
	rs3184504	T	C	T	C	0.1427	-0.0492341	0.4764	0.592991	FALSE	FALSE	FALSE	CffBSP	111446804	0.0402763	0.0240061	TRUE	reported	textfile	12	111884608	0.0128	7.29e-29	11784	GCST90274773.txt	TRUE	reported	textfile	TRUE	0.0104371	124.267	31.4825
	rs367364	T	C	T	C	-0.0828	-0.02775	0.1538	0.875725	FALSE	FALSE	FALSE	CffBSP	32052169	0.439955	0.035933	TRUE	reported	textfile	6	32019946	0.016	2.28e-07	14730	GCST90274773.txt	TRUE	reported	textfile	TRUE	0.0018148	26.777	31.4825
	rs4073745	A	G	A	G	-0.0683	0.0741013	0.7003	0.298462	FALSE	FALSE	FALSE	CffBSP	177306340	0.00354266	0.0254098	TRUE	reported	textfile	5	176733341	0.0131	1.85e-07	14287	GCST90274773.txt	TRUE	reported	textfile	TRUE	0.00189903	27.1793	31.4825
	rs4893	A	G	A	G	0.1471	0.0809865	0.9627	0.0383173	FALSE	FALSE	FALSE	CffBSP	48330351	0.19562	0.0625798	TRUE	reported	textfile	19	48833608	0.0313	2.61e-06	14735	GCST90274773.txt	TRUE	reported	textfile	TRUE	0.0014967	22.084	31.4825
	rs4939490	C	G	C	G	0.1083	0.0305587	0.6328	0.714591	FALSE	TRUE	FALSE	CffBSP	61026179	0.242067	0.0261222	TRUE	reported	textfile	11	60793651	0.012	1.8e-19	14735	GCST90274773.txt	TRUE	reported	textfile	TRUE	0.00549731	81.4396	31.4825
	rs60562286	A	T	A	T	-0.1681	0.0762119	0.0327	0.0169268	FALSE	TRUE	FALSE	CffBSP	112694428	0.407906	0.0920897	TRUE	reported	textfile	10	114454187	0.0352	1.79e-06	14726	GCST90274773.txt	TRUE	reported	textfile	TRUE	0.0015463	22.803	31.4825
	rs61747728	T	C	T	C	0.1841	-0.030076	0.0399	0.937154	FALSE	FALSE	FALSE	CffBSP	179557079	0.542475	0.0493798	TRUE	reported	textfile	1	179526214	0.0313	4.06e-09	14287	GCST90274773.txt	TRUE	reported	textfile	TRUE	0.00241561	34.5906	31.4825
	rs61768480	A	G	A	G	0.0695	0.00982226	0.2776	0.68054	FALSE	FALSE	FALSE	CffBSP	1167770	0.704482	0.0258972	TRUE	reported	textfile	1	1103150	0.0147	2.27e-06	13670	GCST90274773.txt	TRUE	reported	textfile	TRUE	0.00163251	22.3497	31.4825
	rs6488973	A	G	A	G	-0.0613	0.0364656	0.2804	0.664655	FALSE	FALSE	FALSE	CffBSP	125002699	0.144497	0.0249893	TRUE	reported	textfile	12	125487245	0.0135	5.61e-06	14722	GCST90274773.txt	TRUE	reported	textfile	TRUE	0.00139855	20.6155	31.4825
	rs674379	C	G	C	G	0.1193	0.0114997	0.6395	0.673705	FALSE	TRUE	FALSE	CffBSP	61155089	0.646117	0.0250449	TRUE	reported	textfile	11	60922561	0.0126	2.85e-21	12835	GCST90274773.txt	TRUE	reported	textfile	TRUE	0.00693619	89.6339	31.4825
	rs7012814	A	G	A	G	-0.0533	-0.00650412	0.4819	0.49062	FALSE	FALSE	FALSE	CffBSP	9315848	0.783455	0.0236668	TRUE	reported	textfile	8	9173358	0.0119	7.5e-06	14287	GCST90274773.txt	TRUE	reported	textfile	TRUE	0.0014022	20.0586	31.4825
	rs7242462	A	G	A	G	-0.1199	-0.0144168	0.8853	0.140326	FALSE	FALSE	FALSE	CffBSP	48019349	0.670568	0.0338923	TRUE	reported	textfile	18	45545720	0.0187	1.44e-10	14287	GCST90274773.txt	TRUE	reported	textfile	TRUE	0.00286924	41.105	31.4825
	rs7295476	A	T	A	T	-0.118	0.0812778	0.0501	0.0325407	FALSE	TRUE	FALSE	CffBSP	74286482	0.208208	0.0645827	TRUE	reported	textfile	12	74680262	0.0265	8.47e-06	14735	GCST90274773.txt	TRUE	reported	textfile	TRUE	0.00134381	19.825	31.4825
	rs7298384	A	G	A	G	-0.1418	0.000239957	0.9625	0.0299835	FALSE	FALSE	FALSE	CffBSP	128657343	0.997276	0.0702905	TRUE	reported	textfile	12	129141888	0.032	9.37e-06	14718	GCST90274773.txt	TRUE	reported	textfile	TRUE	0.00133237	19.6333	31.4825
	rs74796205	A	G	A	G	0.2987	-0.00241785	0.9884	0.0229076	FALSE	FALSE	FALSE	CffBSP	66474634	0.975449	0.0785665	TRUE	reported	textfile	8	67386869	0.0657	5.46e-06	13800	GCST90274773.txt	TRUE	reported	textfile	TRUE	0.00149558	20.667	31.4825
	rs78808574	A	G	A	G	-0.118	-0.0178942	0.9449	0.0496677	FALSE	FALSE	FALSE	CffBSP	127688260	0.742111	0.05438	TRUE	reported	textfile	11	127558155	0.0265	8.47e-06	14287	GCST90274773.txt	TRUE	reported	textfile	TRUE	0.00138589	19.8249	31.4825
GCST90274774	rs10036880	T	C	T	C	0.0633	0.00650654	0.1501	0.848533	FALSE	FALSE	FALSE	CffBSP	147889514	0.842789	0.0328072	TRUE	reported	textfile	5	147269077	0.0164	0.000114	14732	GCST90274774.txt	TRUE	reported	textfile	TRUE	0.00101023	14.8957	7.9213
	rs10058679	A	G	A	G	-0.1048	-0.0249612	0.0366	0.98821	FALSE	FALSE	FALSE	CffBSP	93829690	0.822592	0.111328	TRUE	reported	textfile	5	93165396	0.0322	0.00114	14735	GCST90274774.txt	TRUE	reported	textfile	TRUE	0.000718371	10.5914	7.9213
	rs10060708	T	C	T	C	-0.0509	-0.0557145	0.7815	0.213825	FALSE	FALSE	FALSE	CffBSP	35596035	0.0517404	0.0286407	TRUE	reported	textfile	5	35596137	0.0156	0.0011	12199	GCST90274774.txt	TRUE	reported	textfile	TRUE	0.000871933	10.6443	7.9213
	rs1009024	A	C	A	C	-0.0545	0.00221786	0.773	0.296954	FALSE	FALSE	FALSE	CffBSP	29700111	0.931299	0.0257259	TRUE	reported	textfile	2	29922977	0.0144	0.000154	14287	GCST90274774.txt	TRUE	reported	textfile	TRUE	0.00100159	14.3221	7.9213
	rs10189618	T	C	T	C	-0.1107	0.0919029	0.9549	0.0346933	FALSE	FALSE	FALSE	CffBSP	216070061	0.150651	0.0639443	TRUE	reported	textfile	2	216934784	0.0289	0.000128	14720	GCST90274774.txt	TRUE	reported	textfile	TRUE	0.00099577	14.6704	7.9213
	rs1019800	A	C	A	C	0.0381	0.0354889	0.6333	0.319244	FALSE	FALSE	FALSE	CffBSP	77315305	0.159445	0.0252242	TRUE	reported	textfile	16	77349202	0.0119	0.00137	14721	GCST90274774.txt	TRUE	reported	textfile	TRUE	0.000695851	10.2494	7.9213
	rs10274315	A	G	A	G	0.0471	-0.0554851	0.2453	0.806594	FALSE	FALSE	FALSE	CffBSP	139020873	0.0633724	0.0298858	TRUE	reported	textfile	7	138705619	0.0144	0.00107	14286	GCST90274774.txt	TRUE	reported	textfile	TRUE	0.000748309	10.6969	7.9213
	rs10280591	A	G	A	G	-0.045	0.00156696	0.2485	0.654884	FALSE	FALSE	FALSE	CffBSP	138055012	0.949809	0.0248935	TRUE	reported	textfile	7	137739758	0.0139	0.00121	14287	GCST90274774.txt	TRUE	reported	textfile	TRUE	0.000733054	10.4794	7.9213
	rs10420560	T	C	T	C	-0.0626	0.00353442	0.8846	0.136866	FALSE	FALSE	FALSE	CffBSP	52230385	0.91794	0.034305	TRUE	reported	textfile	19	52733638	0.0191	0.00105	13236	GCST90274774.txt	TRUE	reported	textfile	TRUE	0.00081091	10.7403	7.9213
	rs10452581	T	C	T	C	-0.0644	0.0505749	0.8672	0.100702	FALSE	FALSE	FALSE	CffBSP	21189757	0.201866	0.0396277	TRUE	reported	textfile	6	21189988	0.0173	0.000197	14733	GCST90274774.txt	TRUE	reported	textfile	TRUE	0.00093968	13.8554	7.9213
	rs10454007	T	C	T	C	0.053	-0.0204624	0.2582	0.775289	FALSE	FALSE	FALSE	CffBSP	89360565	0.467955	0.0281925	TRUE	reported	textfile	12	89754342	0.0141	0.000171	12834	GCST90274774.txt	TRUE	reported	textfile	TRUE	0.0010997	14.1269	7.9213
	rs10455310	C	G	C	G	-0.0367	-0.000878937	0.4355	0.369904	FALSE	TRUE	TRUE	CffBSP	75423461	0.971315	0.0244425	TRUE	reported	textfile	6	76133177	0.0116	0.00156	14730	GCST90274774.txt	TRUE	reported	textfile	FALSE	0.000679076	10.0082	7.9213
	rs10508276	T	C	T	C	0.0463	0.017442	0.2153	0.763085	FALSE	FALSE	FALSE	CffBSP	4129522	0.529605	0.0277469	TRUE	reported	textfile	10	4171714	0.0145	0.00141	14287	GCST90274774.txt	TRUE	reported	textfile	TRUE	0.000713141	10.1945	7.9213
	rs10758581	A	G	A	G	0.054	0.0646904	0.7752	0.209575	FALSE	FALSE	FALSE	CffBSP	431696	0.0251553	0.0288924	TRUE	reported	textfile	9	431696	0.0139	0.000102	14716	GCST90274774.txt	TRUE	reported	textfile	TRUE	0.00102453	15.0903	7.9213
	rs10771833	A	C	A	C	-0.0525	0.00656781	0.4088	0.583684	FALSE	FALSE	FALSE	CffBSP	31444752	0.783098	0.0238583	TRUE	reported	textfile	12	31597686	0.0119	1.03e-05	14287	GCST90274774.txt	TRUE	reported	textfile	TRUE	0.00136048	19.4609	7.9213
	rs10794870	A	G	A	G	-0.0447	-0.00582294	0.4751	0.567507	FALSE	FALSE	FALSE	CffBSP	2163754	0.806796	0.0238097	TRUE	reported	textfile	10	2205948	0.0119	0.000172	14287	GCST90274774.txt	TRUE	reported	textfile	TRUE	0.000986623	14.1078	7.9213
	rs10870152	A	T	A	T	-0.056	-0.038625	0.6118	0.504113	FALSE	TRUE	TRUE	CffBSP	136973274	0.102677	0.0236671	TRUE	reported	textfile	9	139867726	0.015	0.000189	10272	GCST90274774.txt	TRUE	reported	textfile	FALSE	0.00135503	13.9351	7.9213
	rs10882302	A	T	A	T	-0.0611	0.049394	0.1011	0.0668762	FALSE	TRUE	FALSE	CffBSP	93689277	0.302875	0.047942	TRUE	reported	textfile	10	95449034	0.0193	0.00155	14734	GCST90274774.txt	TRUE	reported	textfile	TRUE	0.000679754	10.0209	7.9213
	rs10950787	T	C	T	C	0.1867	-0.0305803	0.0155	0.980311	FALSE	FALSE	FALSE	CffBSP	19969007	0.725257	0.0870141	TRUE	reported	textfile	7	20008630	0.0576	0.00119	13305	GCST90274774.txt	TRUE	reported	textfile	TRUE	0.000789016	10.5046	7.9213
	rs11043369	A	G	A	G	0.0427	0.0216708	0.7311	0.295507	FALSE	FALSE	FALSE	CffBSP	17230487	0.40373	0.0259538	TRUE	reported	textfile	12	17383421	0.013	0.00102	14728	GCST90274774.txt	TRUE	reported	textfile	TRUE	0.000731994	10.7872	7.9213
	rs11064159	T	C	T	C	-0.0444	0.0307744	0.2665	0.753711	FALSE	FALSE	FALSE	CffBSP	6393195	0.260591	0.0273551	TRUE	reported	textfile	12	6502361	0.0137	0.00119	14287	GCST90274774.txt	TRUE	reported	textfile	TRUE	0.000734623	10.5018	7.9213
	rs11075747	A	G	A	G	0.0399	-0.0179866	0.3918	0.606629	FALSE	FALSE	FALSE	CffBSP	69906458	0.45555	0.0241045	TRUE	reported	textfile	16	69940361	0.0122	0.00107	14287	GCST90274774.txt	TRUE	reported	textfile	TRUE	0.000748101	10.6946	7.9213
	rs1108109	T	C	T	C	-0.049	0.0463472	0.6624	0.385307	FALSE	FALSE	FALSE	CffBSP	124371786	0.0555584	0.0242087	TRUE	reported	textfile	12	124856332	0.0126	0.000101	13670	GCST90274774.txt	TRUE	reported	textfile	TRUE	0.0011051	15.1212	7.9213
	rs1109806	T	C	T	C	-0.045	0.0274291	0.694	0.322972	FALSE	FALSE	FALSE	CffBSP	21738831	0.274795	0.0251163	TRUE	reported	textfile	7	21778449	0.0141	0.00142	11782	GCST90274774.txt	TRUE	reported	textfile	TRUE	0.000863759	10.1839	7.9213
	rs11108392	T	C	T	C	0.0666	-0.0299074	0.1336	0.889788	FALSE	FALSE	FALSE	CffBSP	96055046	0.426135	0.0375805	TRUE	reported	textfile	12	96448824	0.0172	0.000108	14732	GCST90274774.txt	TRUE	reported	textfile	TRUE	0.00101669	14.9911	7.9213
	rs11120935	T	C	T	C	0.0579	-0.0154579	0.2033	0.801141	FALSE	FALSE	FALSE	CffBSP	5977669	0.60129	0.0295818	TRUE	reported	textfile	1	6037729	0.0149	0.000102	14287	GCST90274774.txt	TRUE	reported	textfile	TRUE	0.00105581	15.0982	7.9213
	rs111306289	T	TGAGCCAA	T	TGAGCCAA	0.0492	-0.00635222	0.5651	0.404499	FALSE	FALSE	FALSE	CffBSP	11099102	0.791249	0.0239988	TRUE	reported	textfile	16	11192959	0.0131	0.000173	11336	GCST90274774.txt	TRUE	reported	textfile	TRUE	0.00124276	14.103	7.9213
	rs11142915	C	G	C	G	0.0546	-0.0264784	0.8518	0.861934	FALSE	TRUE	FALSE	CffBSP	71600162	0.438124	0.0341497	TRUE	reported	textfile	9	74215078	0.0167	0.00108	14287	GCST90274774.txt	TRUE	reported	textfile	TRUE	0.00074763	10.6879	7.9213
	rs11153923	A	G	A	G	-0.0451	-0.0235921	0.3741	0.675316	FALSE	FALSE	FALSE	CffBSP	120574187	0.347977	0.0251375	TRUE	reported	textfile	6	120895333	0.012	0.000171	14724	GCST90274774.txt	TRUE	reported	textfile	TRUE	0.000958403	14.1232	7.9213
	rs111618884	T	C	T	C	0.1779	0.1186	0.0136	0.992334	FALSE	FALSE	FALSE	CffBSP	150448441	0.393863	0.139099	TRUE	reported	textfile	4	151369593	0.0543	0.00105	14246	GCST90274774.txt	TRUE	reported	textfile	TRUE	0.000752891	10.7323	7.9213
	rs111624149	C	G	C	G	-0.0644	-0.0621324	0.9072	0.903814	FALSE	TRUE	FALSE	CffBSP	2521887	0.120865	0.0400556	TRUE	reported	textfile	6	2522121	0.0202	0.00143	14732	GCST90274774.txt	TRUE	reported	textfile	TRUE	0.000689458	10.1627	7.9213
	rs11166182	A	G	A	G	0.0445	0.00320537	0.4603	0.582167	FALSE	FALSE	FALSE	CffBSP	99111455	0.893445	0.0239304	TRUE	reported	textfile	1	99577011	0.0136	0.00107	11336	GCST90274774.txt	TRUE	reported	textfile	TRUE	0.000943566	10.7045	7.9213
	rs111690174	T	C	T	C	-0.0677	-0.000102454	0.0972	0.889424	FALSE	FALSE	FALSE	CffBSP	20795129	0.997829	0.0376595	TRUE	reported	textfile	19	20977935	0.0207	0.00107	13225	GCST90274774.txt	TRUE	reported	textfile	TRUE	0.000808146	10.6948	7.9213
	rs111728068	C	G	C	G	-0.0564	0.0108247	0.7163	0.641771	FALSE	TRUE	FALSE	CffBSP	154790977	0.663089	0.0248472	TRUE	reported	textfile	1	154763453	0.0132	1.93e-05	14286	GCST90274774.txt	TRUE	reported	textfile	TRUE	0.00127628	18.2536	7.9213
	rs111785083	A	G	A	G	-0.0925	0.0569547	0.0498	0.973501	FALSE	FALSE	FALSE	CffBSP	25071494	0.436448	0.0731873	TRUE	reported	textfile	14	25540700	0.0283	0.00108	14720	GCST90274774.txt	TRUE	reported	textfile	TRUE	0.00072525	10.682	7.9213
	rs111830024	T	C	T	C	-0.1722	0.0983174	0.0222	0.977181	FALSE	FALSE	FALSE	CffBSP	140673902	0.204477	0.0774825	TRUE	reported	textfile	3	140392744	0.0527	0.00108	12205	GCST90274774.txt	TRUE	reported	textfile	TRUE	0.000874032	10.6751	7.9213
	rs11208550	A	G	A	G	0.0548	-0.00705774	0.3065	0.640264	FALSE	FALSE	FALSE	CffBSP	64937461	0.77451	0.0246361	TRUE	reported	textfile	1	65403144	0.0125	1.17e-05	14723	GCST90274774.txt	TRUE	reported	textfile	TRUE	0.0013037	19.2168	7.9213
	rs112105023	A	G	A	G	-0.0846	-0.0187171	0.9237	0.0771925	FALSE	FALSE	FALSE	CffBSP	52337435	0.668806	0.0437531	TRUE	reported	textfile	5	51633269	0.0226	0.000182	14287	GCST90274774.txt	TRUE	reported	textfile	TRUE	0.000979844	14.0108	7.9213
	rs11230555	A	C	A	C	-0.6032	-0.00100394	0.2215	0.820753	FALSE	FALSE	FALSE	CffBSP	60995662	0.973968	0.0307658	TRUE	reported	textfile	11	60763134	0.0134	0	14287	GCST90274774.txt	TRUE	reported	textfile	TRUE	0.124214	2026.06	7.9213
	rs11233453	A	G	A	G	0.0893	0.0249403	0.0627	0.912535	FALSE	FALSE	FALSE	CffBSP	83088014	0.546356	0.0413447	TRUE	reported	textfile	11	82799056	0.0273	0.00107	14735	GCST90274774.txt	TRUE	reported	textfile	TRUE	0.000725625	10.6984	7.9213
	rs112653954	A	G	A	G	-0.1968	0.259661	0.9888	0.00918319	FALSE	FALSE	FALSE	CffBSP	84672522	0.0324116	0.121377	TRUE	reported	textfile	6	85382240	0.0612	0.0013	14732	GCST90274774.txt	TRUE	reported	textfile	TRUE	0.000701424	10.3392	7.9213
	rs112978531	A	C	A	C	-0.1557	-0.144989	0.0192	0.995086	FALSE	FALSE	FALSE	CffBSP	67861926	0.397674	0.171426	TRUE	reported	textfile	1	68327609	0.0474	0.00102	13380	GCST90274774.txt	TRUE	reported	textfile	TRUE	0.000805776	10.7884	7.9213
	rs113060350	T	C	T	C	-0.1036	0.00112918	0.0455	0.942706	FALSE	FALSE	FALSE	CffBSP	37549934	0.982002	0.0500555	TRUE	reported	textfile	19	38040836	0.0318	0.00112	13671	GCST90274774.txt	TRUE	reported	textfile	TRUE	0.000775761	10.6121	7.9213
	rs113138968	T	C	T	C	-0.0531	-0.0385219	0.2045	0.917478	FALSE	FALSE	FALSE	CffBSP	46236895	0.367822	0.0427755	TRUE	reported	textfile	17	44314261	0.0162	0.00105	12404	GCST90274774.txt	TRUE	reported	textfile	TRUE	0.000865409	10.7421	7.9213
	rs113286874	C	G	C	G	-0.0706	-0.0867377	0.9165	0.945273	FALSE	TRUE	FALSE	CffBSP	16550496	0.0911276	0.0513398	TRUE	reported	textfile	20	16531141	0.0215	0.00102	14735	GCST90274774.txt	TRUE	reported	textfile	TRUE	0.000731248	10.7814	7.9213
	rs113783169	T	C	T	C	0.1286	0.0903086	0.9475	0.0358849	FALSE	FALSE	FALSE	CffBSP	55481591	0.163341	0.0647874	TRUE	reported	textfile	2	55708727	0.0294	1.22e-05	14287	GCST90274774.txt	TRUE	reported	textfile	TRUE	0.00133741	19.1305	7.9213
	rs113865104	A	G	A	G	0.1038	0.0198449	0.9311	0.116682	FALSE	FALSE	FALSE	CffBSP	43037052	0.592374	0.0370656	TRUE	reported	textfile	1	43502723	0.0276	0.000169	12183	GCST90274774.txt	TRUE	reported	textfile	TRUE	0.00115963	14.1418	7.9213
	rs113883413	A	G	A	G	-0.0414	-0.0135133	0.3108	0.753679	FALSE	FALSE	FALSE	CffBSP	19859447	0.62071	0.0273081	TRUE	reported	textfile	1	20185940	0.0127	0.00111	13867	GCST90274774.txt	TRUE	reported	textfile	TRUE	0.000765734	10.625	7.9213
	rs113935627	A	C	A	C	0.0961	-0.0325688	0.0593	0.939593	FALSE	FALSE	FALSE	CffBSP	54243088	0.510616	0.0495058	TRUE	reported	textfile	12	54636872	0.0253	0.000146	14287	GCST90274774.txt	TRUE	reported	textfile	TRUE	0.00100885	14.426	7.9213
	rs113989128	A	G	A	G	0.3301	-0.171089	0.9929	0.00293687	FALSE	FALSE	FALSE	CffBSP	100989306	0.412238	0.208655	TRUE	reported	textfile	15	101529511	0.1004	0.00101	8100	GCST90274774.txt	TRUE	reported	textfile	TRUE	0.00133278	10.8073	7.9213
	rs114205489	T	C	T	C	0.1359	0.0555385	0.9442	0.0292359	FALSE	FALSE	FALSE	CffBSP	48101925	0.421974	0.0691637	TRUE	reported	textfile	3	48143415	0.0359	0.000153	14720	GCST90274774.txt	TRUE	reported	textfile	TRUE	0.000972567	14.3282	7.9213
	rs11420963	G	GA	G	GA	0.0506	-0.0167181	0.2607	0.744957	FALSE	FALSE	FALSE	CffBSP	29028390	0.536613	0.0270545	TRUE	reported	textfile	18	26608354	0.0155	0.0011	10894	GCST90274774.txt	TRUE	reported	textfile	TRUE	0.000977295	10.6551	7.9213
	rs114355296	A	G	A	G	-0.1379	0.102838	0.0221	0.968245	FALSE	FALSE	FALSE	CffBSP	74032646	0.130477	0.0680047	TRUE	reported	textfile	5	73328471	0.0431	0.00138	14287	GCST90274774.txt	TRUE	reported	textfile	TRUE	0.000716015	10.2356	7.9213
	rs114434362	A	G	A	G	0.1327	-0.0786038	0.9688	0.0197569	FALSE	FALSE	FALSE	CffBSP	204963621	0.348469	0.0838385	TRUE	reported	textfile	1	204932749	0.0355	0.000185	14717	GCST90274774.txt	TRUE	reported	textfile	TRUE	0.000948536	13.971	7.9213
	rs114686946	A	G	A	G	0.099	-0.0778413	0.9478	0.0316834	FALSE	FALSE	FALSE	CffBSP	98195213	0.244911	0.066943	TRUE	reported	textfile	3	97914057	0.0303	0.00109	12852	GCST90274774.txt	TRUE	reported	textfile	TRUE	0.000829954	10.6738	7.9213
	rs114725206	A	G	A	G	-0.1838	0.00913674	0.0132	0.995898	FALSE	FALSE	FALSE	CffBSP	231870776	0.959671	0.180689	TRUE	reported	textfile	2	232735486	0.0566	0.00116	14244	GCST90274774.txt	TRUE	reported	textfile	TRUE	0.000739784	10.5438	7.9213
	rs114831627	T	C	T	C	0.1468	0.0180526	0.0252	0.977994	FALSE	FALSE	FALSE	CffBSP	83988859	0.817827	0.0783734	TRUE	reported	textfile	2	84215983	0.0389	0.000161	14727	GCST90274774.txt	TRUE	reported	textfile	TRUE	0.000966093	14.2395	7.9213
	rs115040308	A	T	A	T	-0.0484	0.0373086	0.2345	0.246152	FALSE	TRUE	FALSE	CffBSP	121040752	0.172856	0.0273707	TRUE	reported	textfile	5	120376447	0.0148	0.00107	12849	GCST90274774.txt	TRUE	reported	textfile	TRUE	0.000831642	10.693	7.9213
	rs115236013	T	C	T	C	0.1896	-0.0372673	0.0138	0.99018	FALSE	FALSE	FALSE	CffBSP	60346243	0.76775	0.126193	TRUE	reported	textfile	3	60331974	0.0583	0.00115	14245	GCST90274774.txt	TRUE	reported	textfile	TRUE	0.000741916	10.575	7.9213
	rs115325002	A	G	A	G	-0.1242	-0.0429422	0.0393	0.951207	FALSE	FALSE	FALSE	CffBSP	6973298	0.429884	0.0543991	TRUE	reported	textfile	2	7113429	0.0324	0.000126	14287	GCST90274774.txt	TRUE	reported	textfile	TRUE	0.00102746	14.6924	7.9213
	rs115336604	T	G	T	G	0.1631	0.16586	0.9782	0.0322788	FALSE	FALSE	FALSE	CffBSP	150838004	0.014751	0.0680189	TRUE	reported	textfile	2	151694518	0.0433	0.000165	14727	GCST90274774.txt	TRUE	reported	textfile	TRUE	0.000962498	14.1864	7.9213
	rs115356061	A	G	A	G	-0.1163	0.0144508	0.0303	0.984154	FALSE	FALSE	FALSE	CffBSP	54578713	0.87896	0.0948912	TRUE	reported	textfile	5	53874543	0.0362	0.00131	14735	GCST90274774.txt	TRUE	reported	textfile	TRUE	0.000699984	10.3201	7.9213
	rs115610208	A	G	A	G	-0.1156	0.120239	0.9715	0.0131554	FALSE	FALSE	FALSE	CffBSP	95810374	0.235297	0.101312	TRUE	reported	textfile	5	95146078	0.0352	0.00102	14735	GCST90274774.txt	TRUE	reported	textfile	TRUE	0.000731413	10.7838	7.9213
	rs1156469	T	C	T	C	0.0404	0.0086569	0.6604	0.325527	FALSE	FALSE	FALSE	CffBSP	89702486	0.731169	0.0251969	TRUE	reported	textfile	7	89331800	0.0126	0.00134	14287	GCST90274774.txt	TRUE	reported	textfile	TRUE	0.000719065	10.2792	7.9213
	rs115874815	T	C	T	C	0.1934	0.141382	0.9799	0.0174357	FALSE	FALSE	FALSE	CffBSP	134288819	0.117942	0.0904284	TRUE	reported	textfile	3	134007661	0.0513	0.000163	14287	GCST90274774.txt	TRUE	reported	textfile	TRUE	0.000993815	14.2108	7.9213
	rs1158921	T	C	T	C	0.0443	-0.0157679	0.2425	0.765549	FALSE	FALSE	FALSE	CffBSP	103069768	0.576327	0.0282196	TRUE	reported	textfile	8	104081996	0.0136	0.00112	14735	GCST90274774.txt	TRUE	reported	textfile	TRUE	0.00071956	10.6089	7.9213
	rs11591752	T	C	T	C	-0.0593	-0.0344021	0.82	0.172359	FALSE	FALSE	FALSE	CffBSP	122055879	0.270239	0.0312034	TRUE	reported	textfile	10	123815394	0.0155	0.00013	14733	GCST90274774.txt	TRUE	reported	textfile	TRUE	0.000992484	14.6348	7.9213
	rs115944391	T	C	T	C	0.1492	-0.138911	0.9793	0.0149805	FALSE	FALSE	FALSE	CffBSP	196355106	0.148272	0.0960882	TRUE	reported	textfile	1	196324236	0.0456	0.00107	13866	GCST90274774.txt	TRUE	reported	textfile	TRUE	0.000771475	10.704	7.9213
	rs116026678	A	G	A	G	-0.1532	-0.0406545	0.981	0.0115001	FALSE	FALSE	FALSE	CffBSP	90094194	0.71342	0.110695	TRUE	reported	textfile	5	89390011	0.0471	0.00114	13800	GCST90274774.txt	TRUE	reported	textfile	TRUE	0.000766062	10.5782	7.9213
	rs11625815	A	G	A	G	0.0381	0.0101483	0.3745	0.585962	FALSE	FALSE	FALSE	CffBSP	88343632	0.67116	0.0239032	TRUE	reported	textfile	14	88809976	0.012	0.0015	14734	GCST90274774.txt	TRUE	reported	textfile	TRUE	0.000683707	10.0793	7.9213
	rs116278732	C	G	C	G	-0.2383	0.0173501	0.019	0.0146816	FALSE	TRUE	FALSE	CffBSP	183621487	0.864421	0.101612	TRUE	reported	textfile	1	183590622	0.0639	0.000192	11240	GCST90274774.txt	TRUE	reported	textfile	TRUE	0.00123579	13.9049	7.9213
	rs116325185	T	G	T	G	0.0845	0.018581	0.9382	0.0428205	FALSE	FALSE	FALSE	CffBSP	48044922	0.748016	0.0578386	TRUE	reported	textfile	2	48272061	0.0258	0.00106	14287	GCST90274774.txt	TRUE	reported	textfile	TRUE	0.000750252	10.7254	7.9213
	rs116358673	T	C	T	C	-0.1577	0.0100386	0.016	0.974136	FALSE	FALSE	FALSE	CffBSP	28645370	0.891417	0.0735363	TRUE	reported	textfile	2	28868236	0.0498	0.00154	14732	GCST90274774.txt	TRUE	reported	textfile	TRUE	0.000680217	10.0264	7.9213
	rs116431941	A	C	A	C	0.1834	-0.0388428	0.9843	0.0114615	FALSE	FALSE	FALSE	CffBSP	117606600	0.720328	0.108493	TRUE	reported	textfile	2	118364176	0.0559	0.00103	13421	GCST90274774.txt	TRUE	reported	textfile	TRUE	0.000801386	10.7624	7.9213
	rs11649176	A	G	A	G	0.0469	-0.064252	0.2973	0.701982	FALSE	FALSE	FALSE	CffBSP	6603898	0.0122526	0.0256517	TRUE	reported	textfile	16	6653899	0.0144	0.00113	11784	GCST90274774.txt	TRUE	reported	textfile	TRUE	0.000899368	10.6059	7.9213
	rs1165016	T	C	T	C	-0.0546	-0.0725881	0.7579	0.221813	FALSE	FALSE	FALSE	CffBSP	135714078	0.010625	0.0284125	TRUE	reported	textfile	9	138605924	0.0167	0.00108	10272	GCST90274774.txt	TRUE	reported	textfile	TRUE	0.00103955	10.6873	7.9213
	rs116577005	A	G	A	G	0.0965	-0.0179539	0.0409	0.929634	FALSE	FALSE	FALSE	CffBSP	135815850	0.699971	0.04659	TRUE	reported	textfile	4	136737005	0.0295	0.00107	14728	GCST90274774.txt	TRUE	reported	textfile	TRUE	0.000726025	10.6992	7.9213
	rs11671690	A	G	A	G	0.0918	0.0102626	0.0476	0.957451	FALSE	FALSE	FALSE	CffBSP	47883128	0.858817	0.0576937	TRUE	reported	textfile	19	48386385	0.0287	0.00138	14733	GCST90274774.txt	TRUE	reported	textfile	TRUE	0.000693951	10.2297	7.9213
	rs11678584	A	T	A	T	0.0591	-0.034817	0.8658	0.874331	FALSE	TRUE	FALSE	CffBSP	32338357	0.331607	0.0358612	TRUE	reported	textfile	2	32563426	0.018	0.00103	14287	GCST90274774.txt	TRUE	reported	textfile	TRUE	0.000753983	10.7788	7.9213
	rs11679652	A	T	A	T	0.0437	-0.0299294	0.7309	0.796615	FALSE	TRUE	FALSE	CffBSP	68683856	0.305028	0.0291792	TRUE	reported	textfile	2	68910988	0.0135	0.00121	14287	GCST90274774.txt	TRUE	reported	textfile	TRUE	0.000732885	10.4769	7.9213
	rs116963150	T	C	T	C	-0.1636	-0.0292463	0.0169	0.986826	FALSE	FALSE	FALSE	CffBSP	131526524	0.777306	0.103405	TRUE	reported	textfile	8	132538771	0.0509	0.00131	14735	GCST90274774.txt	TRUE	reported	textfile	TRUE	0.00070061	10.3293	7.9213
	rs117056573	T	C	T	C	0.1999	-0.172722	0.989	0.00306797	FALSE	FALSE	FALSE	CffBSP	38539495	0.404696	0.207284	TRUE	reported	textfile	20	37168138	0.062	0.00126	13800	GCST90274774.txt	TRUE	reported	textfile	TRUE	0.000752725	10.3939	7.9213
	rs117070965	T	C	T	C	0.1584	0.102757	0.0237	0.990397	FALSE	FALSE	FALSE	CffBSP	51604946	0.402917	0.122853	TRUE	reported	textfile	8	52517506	0.0482	0.00102	14287	GCST90274774.txt	TRUE	reported	textfile	TRUE	0.000755348	10.7983	7.9213
	rs117119599	C	G	C	G	-0.1427	0.0966519	0.0286	0.0268354	FALSE	TRUE	FALSE	CffBSP	42866073	0.184232	0.072789	TRUE	reported	textfile	14	43335276	0.0377	0.000154	14719	GCST90274774.txt	TRUE	reported	textfile	TRUE	0.000972444	14.3254	7.9213
	rs117139796	A	G	A	G	-0.2042	-0.134308	0.0149	0.990936	FALSE	FALSE	FALSE	CffBSP	66081801	0.277584	0.123699	TRUE	reported	textfile	14	66548519	0.0536	0.000139	14287	GCST90274774.txt	TRUE	reported	textfile	TRUE	0.00101485	14.5118	7.9213
	rs117183667	T	C	T	C	-0.1906	-0.026847	0.0151	0.98176	FALSE	FALSE	FALSE	CffBSP	91819879	0.759749	0.0877896	TRUE	reported	textfile	8	92832107	0.0508	0.000175	14734	GCST90274774.txt	TRUE	reported	textfile	TRUE	0.000954515	14.0754	7.9213
	rs117247679	A	T	A	T	-0.061	0.00125678	0.8817	0.908659	FALSE	TRUE	FALSE	CffBSP	34294889	0.975786	0.0414073	TRUE	reported	textfile	11	34316436	0.0191	0.0014	14287	GCST90274774.txt	TRUE	reported	textfile	TRUE	0.000713415	10.1984	7.9213
	rs117262879	A	G	A	G	0.2028	0.437599	0.9872	0.00280149	FALSE	FALSE	FALSE	CffBSP	111736250	0.0446159	0.2179	TRUE	reported	textfile	11	111606974	0.0618	0.00103	13800	GCST90274774.txt	TRUE	reported	textfile	TRUE	0.000779724	10.767	7.9213
	rs117308553	A	G	A	G	-0.1143	-0.0236619	0.0365	0.988697	FALSE	FALSE	FALSE	CffBSP	10093252	0.82764	0.108676	TRUE	reported	textfile	20	10073900	0.0354	0.00124	14735	GCST90274774.txt	TRUE	reported	textfile	TRUE	0.000707015	10.4238	7.9213
	rs117364891	T	C	T	C	0.182	0.0965798	0.017	0.997394	FALSE	FALSE	FALSE	CffBSP	104892740	0.689271	0.241544	TRUE	reported	textfile	14	105359077	0.0571	0.00144	13223	GCST90274774.txt	TRUE	reported	textfile	TRUE	0.000767727	10.1579	7.9213
	rs117539242	A	G	A	G	0.1354	-0.00436566	0.0221	0.987128	FALSE	FALSE	FALSE	CffBSP	85464244	0.966495	0.103932	TRUE	reported	textfile	12	85858022	0.0413	0.00104	14734	GCST90274774.txt	TRUE	reported	textfile	TRUE	0.000728954	10.7468	7.9213
	rs117567961	A	G	A	G	-0.1369	-0.0431888	0.0239	0.982974	FALSE	FALSE	FALSE	CffBSP	48783861	0.64041	0.0924564	TRUE	reported	textfile	22	49179673	0.0418	0.00106	14735	GCST90274774.txt	TRUE	reported	textfile	TRUE	0.000727425	10.725	7.9213
	rs117601022	A	C	A	C	0.1681	-0.275617	0.0227	0.983416	FALSE	FALSE	FALSE	CffBSP	132997157	0.000938707	0.0833112	TRUE	reported	textfile	8	134009402	0.0451	0.000194	14287	GCST90274774.txt	TRUE	reported	textfile	TRUE	0.000971447	13.8906	7.9213
	rs117744212	A	G	A	G	0.1327	-0.0877046	0.9736	0.036786	FALSE	FALSE	FALSE	CffBSP	6486443	0.182155	0.0657382	TRUE	reported	textfile	18	6486442	0.041	0.00121	14734	GCST90274774.txt	TRUE	reported	textfile	TRUE	0.000710468	10.4741	7.9213
	rs117745456	A	G	A	G	-0.1515	0.00293963	0.0251	0.977191	FALSE	FALSE	FALSE	CffBSP	31652151	0.970841	0.0804188	TRUE	reported	textfile	17	29979170	0.0396	0.00013	14719	GCST90274774.txt	TRUE	reported	textfile	TRUE	0.000993402	14.6344	7.9213
	rs117773671	T	C	T	C	0.1293	0.0130773	0.9688	0.0187508	FALSE	FALSE	FALSE	CffBSP	22960482	0.880025	0.0866407	TRUE	reported	textfile	13	23534621	0.0408	0.00153	14287	GCST90274774.txt	TRUE	reported	textfile	TRUE	0.000702474	10.0419	7.9213
	rs117813292	T	C	T	C	-0.102	-0.0902675	0.0493	0.963545	FALSE	FALSE	FALSE	CffBSP	101537001	0.152289	0.0630583	TRUE	reported	textfile	15	102077204	0.0313	0.00112	14287	GCST90274774.txt	TRUE	reported	textfile	TRUE	0.000742759	10.6182	7.9213
	rs117854430	T	C	T	C	-0.1324	-0.00458566	0.0308	0.969723	FALSE	FALSE	FALSE	CffBSP	49611934	0.946272	0.0680472	TRUE	reported	textfile	16	49645845	0.0413	0.00135	14713	GCST90274774.txt	TRUE	reported	textfile	TRUE	0.000698026	10.2758	7.9213
	rs117954930	A	G	A	G	-0.203	-0.45745	0.0156	0.998605	FALSE	FALSE	FALSE	CffBSP	94617796	0.130605	0.302602	TRUE	reported	textfile	10	96377553	0.0634	0.00137	11438	GCST90274774.txt	TRUE	reported	textfile	TRUE	0.000895518	10.2503	7.9213
	rs117960054	A	C	A	C	0.1401	-0.0302605	0.9795	0.0124256	FALSE	FALSE	FALSE	CffBSP	85414809	0.769386	0.103215	TRUE	reported	textfile	8	86327038	0.0426	0.00101	14734	GCST90274774.txt	TRUE	reported	textfile	TRUE	0.00073353	10.8143	7.9213
	rs117984514	A	C	A	C	0.1089	-0.0681364	0.9618	0.0284653	FALSE	FALSE	FALSE	CffBSP	40411873	0.343293	0.0718982	TRUE	reported	textfile	7	40451472	0.0341	0.00141	14287	GCST90274774.txt	TRUE	reported	textfile	TRUE	0.000713339	10.1973	7.9213
	rs118008654	A	G	A	G	-0.1207	0.0605599	0.0262	0.972641	FALSE	FALSE	FALSE	CffBSP	57153849	0.397562	0.0715853	TRUE	reported	textfile	16	57187761	0.0379	0.00145	14732	GCST90274774.txt	TRUE	reported	textfile	TRUE	0.00068798	10.1409	7.9213
	rs118073968	A	C	A	C	0.1056	-0.0576135	0.9581	0.0182594	FALSE	FALSE	FALSE	CffBSP	26199091	0.524701	0.0905708	TRUE	reported	textfile	14	26668297	0.0326	0.0012	14713	GCST90274774.txt	TRUE	reported	textfile	TRUE	0.000712659	10.4914	7.9213
	rs118190094	T	G	T	G	-0.1723	0.0391955	0.0154	0.994068	FALSE	FALSE	FALSE	CffBSP	152601530	0.800592	0.15518	TRUE	reported	textfile	7	152298615	0.0529	0.00113	13868	GCST90274774.txt	TRUE	reported	textfile	TRUE	0.000764387	10.6071	7.9213
	rs11847277	A	G	A	G	0.0403	0.0574601	0.6367	0.33712	FALSE	FALSE	FALSE	CffBSP	102704677	0.0207253	0.0248427	TRUE	reported	textfile	14	103171014	0.0123	0.00105	14287	GCST90274774.txt	TRUE	reported	textfile	TRUE	0.000750814	10.7334	7.9213
	rs11945427	T	C	T	C	-0.0388	0.00416734	0.4299	0.53547	FALSE	FALSE	FALSE	CffBSP	94859023	0.859827	0.0235984	TRUE	reported	textfile	4	95780174	0.0118	0.00101	14718	GCST90274774.txt	TRUE	reported	textfile	TRUE	0.00073406	10.8104	7.9213
	rs11998010	A	G	A	G	0.0386	0.0175032	0.6151	0.351698	FALSE	FALSE	FALSE	CffBSP	88899433	0.476631	0.0245924	TRUE	reported	textfile	8	89911662	0.0119	0.00118	14706	GCST90274774.txt	TRUE	reported	textfile	TRUE	0.00071495	10.5201	7.9213
	rs12145511	A	G	A	G	0.2077	0.413282	0.0134	0.999437	FALSE	FALSE	FALSE	CffBSP	42871373	0.395921	0.486827	TRUE	reported	textfile	1	43337044	0.0646	0.0013	10237	GCST90274774.txt	TRUE	reported	textfile	TRUE	0.00100878	10.3353	7.9213
	rs12152292	A	C	A	C	0.0532	-0.0110221	0.2383	0.647389	FALSE	FALSE	FALSE	CffBSP	153279252	0.657532	0.0248624	TRUE	reported	textfile	3	152997041	0.0139	0.00013	14709	GCST90274774.txt	TRUE	reported	textfile	TRUE	0.000994897	14.6465	7.9213
	rs1219724	T	G	T	G	0.0466	-0.00400809	0.6262	0.368627	FALSE	FALSE	FALSE	CffBSP	123768781	0.869611	0.0244169	TRUE	reported	textfile	10	125528297	0.012	0.000103	14731	GCST90274774.txt	TRUE	reported	textfile	TRUE	0.00102266	15.0782	7.9213
	rs12204064	T	C	T	C	-0.0812	0.00347401	0.0604	0.961585	FALSE	FALSE	FALSE	CffBSP	71191984	0.954583	0.0609981	TRUE	reported	textfile	6	71901687	0.0249	0.00111	14730	GCST90274774.txt	TRUE	reported	textfile	TRUE	0.000721435	10.633	7.9213
	rs12209579	C	G	C	G	0.0872	0.0518778	0.9459	0.974449	FALSE	TRUE	FALSE	CffBSP	43209237	0.478899	0.073266	TRUE	reported	textfile	6	43176975	0.0265	0.001	14735	GCST90274774.txt	TRUE	reported	textfile	TRUE	0.000734298	10.8264	7.9213
	rs12225881	T	G	T	G	-0.0956	0.0165822	0.0601	0.9387	FALSE	FALSE	FALSE	CffBSP	100168250	0.734812	0.0489537	TRUE	reported	textfile	11	100038982	0.0246	0.000102	14729	GCST90274774.txt	TRUE	reported	textfile	TRUE	0.0010243	15.1003	7.9213
	rs12226878	T	C	T	C	-0.0837	0.0623922	0.9327	0.050367	FALSE	FALSE	FALSE	CffBSP	101309806	0.238277	0.0529059	TRUE	reported	textfile	11	101180537	0.0256	0.00108	11985	GCST90274774.txt	TRUE	reported	textfile	TRUE	0.00089114	10.6881	7.9213
	rs12243385	A	G	A	G	-0.0375	-0.00523984	0.5774	0.358932	FALSE	FALSE	FALSE	CffBSP	53384790	0.830644	0.0244994	TRUE	reported	textfile	10	55144550	0.0116	0.00123	14728	GCST90274774.txt	TRUE	reported	textfile	TRUE	0.000709079	10.4493	7.9213
	rs12295730	T	C	T	C	0.1102	-0.105429	0.9521	0.0653923	FALSE	FALSE	FALSE	CffBSP	78423950	0.0262126	0.0474253	TRUE	reported	textfile	11	78134996	0.0295	0.000187	14287	GCST90274774.txt	TRUE	reported	textfile	TRUE	0.000975785	13.9527	7.9213
	rs12322244	T	C	T	C	0.1469	0.0405667	0.9735	0.0119104	FALSE	FALSE	FALSE	CffBSP	94111914	0.708104	0.10835	TRUE	reported	textfile	12	94505690	0.0383	0.000125	14735	GCST90274774.txt	TRUE	reported	textfile	TRUE	0.000997384	14.7091	7.9213
	rs1236637	A	G	A	G	-0.0382	-0.00159596	0.5328	0.520243	FALSE	FALSE	FALSE	CffBSP	47571196	0.946011	0.0235683	TRUE	reported	textfile	12	47964979	0.0117	0.00109	14735	GCST90274774.txt	TRUE	reported	textfile	TRUE	0.000722921	10.6585	7.9213
	rs1245478	A	G	A	G	-0.0513	0.0462012	0.2707	0.715005	FALSE	FALSE	FALSE	CffBSP	94708988	0.0769768	0.0261245	TRUE	reported	textfile	1	95174544	0.0134	0.000129	14287	GCST90274774.txt	TRUE	reported	textfile	TRUE	0.0010248	14.6543	7.9213
	rs12481241	T	C	T	C	0.0465	-0.024203	0.6396	0.364839	FALSE	FALSE	FALSE	CffBSP	38800766	0.321739	0.0244255	TRUE	reported	textfile	20	37429409	0.012	0.000107	14729	GCST90274774.txt	TRUE	reported	textfile	TRUE	0.00101842	15.0136	7.9213
	rs12494691	A	G	A	G	0.0494	-0.0110031	0.2743	0.712745	FALSE	FALSE	FALSE	CffBSP	16658827	0.67191	0.0259796	TRUE	reported	textfile	3	16700334	0.013	0.000145	14734	GCST90274774.txt	TRUE	reported	textfile	TRUE	0.000979087	14.438	7.9213
	rs12622284	A	C	A	C	-0.0489	0.0618576	0.6664	0.319672	FALSE	FALSE	FALSE	CffBSP	198836007	0.0143764	0.0252715	TRUE	reported	textfile	2	199700731	0.0126	0.000104	14287	GCST90274774.txt	TRUE	reported	textfile	TRUE	0.00105312	15.0597	7.9213
	rs12651588	T	G	T	G	-0.0774	-0.0763354	0.1061	0.879665	FALSE	FALSE	FALSE	CffBSP	180400973	0.0339164	0.0359892	TRUE	reported	textfile	4	181322126	0.0204	0.000148	12842	GCST90274774.txt	TRUE	reported	textfile	TRUE	0.0011197	14.3931	7.9213
	rs12674463	T	C	T	C	-0.0708	0.0804693	0.8406	0.149861	FALSE	FALSE	FALSE	CffBSP	40876220	0.0165166	0.0335667	TRUE	reported	textfile	7	40915819	0.0184	0.000119	11336	GCST90274774.txt	TRUE	reported	textfile	TRUE	0.00130438	14.8032	7.9213
	rs12706911	C	G	C	G	-0.0498	-0.0048996	0.7238	0.704067	FALSE	TRUE	FALSE	CffBSP	130036083	0.850329	0.0259652	TRUE	reported	textfile	7	129675923	0.0152	0.00105	11336	GCST90274774.txt	TRUE	reported	textfile	TRUE	0.000946021	10.7324	7.9213
	rs12707772	T	G	T	G	0.0514	0.00180255	0.8391	0.135638	FALSE	FALSE	FALSE	CffBSP	102264525	0.958244	0.0344279	TRUE	reported	textfile	8	103276753	0.0158	0.00114	14732	GCST90274774.txt	TRUE	reported	textfile	TRUE	0.000717858	10.5816	7.9213
	rs12795974	C	G	C	G	-0.0858	0.0349056	0.9395	0.888507	FALSE	TRUE	FALSE	CffBSP	97666862	0.357328	0.0379215	TRUE	reported	textfile	11	97537862	0.0265	0.0012	14733	GCST90274774.txt	TRUE	reported	textfile	TRUE	0.000711022	10.4815	7.9213
	rs12895434	T	G	T	G	0.0593	-0.0287637	0.2427	0.738699	FALSE	FALSE	FALSE	CffBSP	27232581	0.285674	0.0269409	TRUE	reported	textfile	14	27701787	0.0139	1.99e-05	14287	GCST90274774.txt	TRUE	reported	textfile	TRUE	0.00127229	18.1978	7.9213
	rs12922372	A	G	A	G	0.0623	-0.00887837	0.2223	0.727967	FALSE	FALSE	FALSE	CffBSP	5371541	0.739037	0.0266514	TRUE	reported	textfile	16	5421542	0.0164	0.000145	11336	GCST90274774.txt	TRUE	reported	textfile	TRUE	0.00127138	14.4282	7.9213
	rs12933645	T	C	T	C	-0.0482	0.0434045	0.4596	0.529772	FALSE	FALSE	FALSE	CffBSP	87802055	0.0654621	0.0235627	TRUE	reported	textfile	16	87835661	0.0124	0.000101	13222	GCST90274774.txt	TRUE	reported	textfile	TRUE	0.00114145	15.1072	7.9213
	rs12977811	A	G	A	G	0.0412	0.0239777	0.4109	0.547269	FALSE	FALSE	FALSE	CffBSP	2023519	0.313903	0.0238094	TRUE	reported	textfile	19	2023518	0.0126	0.00108	13223	GCST90274774.txt	TRUE	reported	textfile	TRUE	0.000807927	10.6902	7.9213
	rs13010358	T	G	T	G	-0.1702	-0.0534009	0.0161	0.993548	FALSE	FALSE	FALSE	CffBSP	240790368	0.703283	0.140199	TRUE	reported	textfile	2	241729785	0.0518	0.00102	13671	GCST90274774.txt	TRUE	reported	textfile	TRUE	0.000789072	10.7943	7.9213
	rs13100574	A	G	A	G	0.0535	-0.00416147	0.8375	0.213011	FALSE	FALSE	FALSE	CffBSP	53562157	0.88532	0.0288532	TRUE	reported	textfile	3	53596184	0.0163	0.00103	14287	GCST90274774.txt	TRUE	reported	textfile	TRUE	0.000753467	10.7714	7.9213
	rs13107337	T	C	T	C	-0.0457	0.0390844	0.5027	0.538656	FALSE	FALSE	FALSE	CffBSP	75822842	0.100132	0.0237709	TRUE	reported	textfile	4	76743995	0.0118	0.000108	14287	GCST90274774.txt	TRUE	reported	textfile	TRUE	0.00104875	14.9971	7.9213
	rs13109915	C	G	C	G	0.0432	0.00453199	0.2826	0.331295	FALSE	TRUE	FALSE	CffBSP	1499841	0.857034	0.0251566	TRUE	reported	textfile	4	1501568	0.0135	0.00137	13646	GCST90274774.txt	TRUE	reported	textfile	TRUE	0.00074984	10.2385	7.9213
	rs13133604	A	G	A	G	0.0712	-0.0633534	0.1112	0.865874	FALSE	FALSE	FALSE	CffBSP	173749076	0.0655134	0.0343988	TRUE	reported	textfile	4	174670227	0.0186	0.000129	14720	GCST90274774.txt	TRUE	reported	textfile	TRUE	0.000994476	14.6513	7.9213
	rs13174320	A	G	A	G	-0.0795	-0.0487058	0.0651	0.927111	FALSE	FALSE	FALSE	CffBSP	160180054	0.291936	0.0462154	TRUE	reported	textfile	5	159607061	0.0243	0.00107	14724	GCST90274774.txt	TRUE	reported	textfile	TRUE	0.000726407	10.7019	7.9213
	rs13183699	A	C	A	C	0.0486	-0.0115909	0.3506	0.659088	FALSE	FALSE	FALSE	CffBSP	172287635	0.64299	0.0250061	TRUE	reported	textfile	5	171714639	0.0129	0.000165	14287	GCST90274774.txt	TRUE	reported	textfile	TRUE	0.000992478	14.1916	7.9213
	rs13193745	A	C	A	C	0.0452	-0.0069267	0.6267	0.386608	FALSE	FALSE	FALSE	CffBSP	37725856	0.774089	0.0241323	TRUE	reported	textfile	6	37693632	0.0119	0.000146	14731	GCST90274774.txt	TRUE	reported	textfile	TRUE	0.000978421	14.4253	7.9213
	rs13228677	T	C	T	C	0.057	0.0346954	0.1914	0.84176	FALSE	FALSE	FALSE	CffBSP	21071604	0.28487	0.0324425	TRUE	reported	textfile	7	21111223	0.0148	0.000117	14735	GCST90274774.txt	TRUE	reported	textfile	TRUE	0.00100563	14.8309	7.9213
	rs13245486	T	G	T	G	0.0407	0.0411694	0.6804	0.250956	FALSE	FALSE	FALSE	CffBSP	3003772	0.129353	0.0271448	TRUE	reported	textfile	7	3043406	0.0124	0.00103	14733	GCST90274774.txt	TRUE	reported	textfile	TRUE	0.000730696	10.7718	7.9213
	rs13273557	A	G	A	G	0.039	-0.00542286	0.5037	0.494842	FALSE	FALSE	FALSE	CffBSP	5300400	0.817537	0.0235047	TRUE	reported	textfile	8	5157922	0.0119	0.00105	14287	GCST90274774.txt	TRUE	reported	textfile	TRUE	0.000751221	10.7393	7.9213
	rs13302444	A	G	A	G	0.0914	-0.09942	0.9389	0.0664885	FALSE	FALSE	FALSE	CffBSP	32858142	0.0365132	0.0475428	TRUE	reported	textfile	9	32858140	0.0279	0.00105	12404	GCST90274774.txt	TRUE	reported	textfile	TRUE	0.000864463	10.7304	7.9213
	rs13345020	A	G	A	G	-0.0582	0.0123553	0.2262	0.748742	FALSE	FALSE	FALSE	CffBSP	2554439	0.650703	0.0272874	TRUE	reported	textfile	19	2554437	0.0151	0.000116	13657	GCST90274774.txt	TRUE	reported	textfile	TRUE	0.00108659	14.8535	7.9213
	rs13386556	C	G	C	G	-0.1279	0.0382482	0.0355	0.013549	FALSE	TRUE	FALSE	CffBSP	183501954	0.708205	0.102195	TRUE	reported	textfile	2	184366682	0.033	0.000106	14726	GCST90274774.txt	TRUE	reported	textfile	TRUE	0.00101903	15.0195	7.9213
	rs1360588	A	G	A	G	0.0378	-0.0393794	0.5235	0.473918	FALSE	FALSE	FALSE	CffBSP	170358044	0.0955213	0.0236234	TRUE	reported	textfile	1	170327185	0.0116	0.00112	14726	GCST90274774.txt	TRUE	reported	textfile	TRUE	0.000720559	10.6172	7.9213
	rs138596684	G	GTTTGT	G	GTTTGT	0.1335	-0.186043	0.9674	0.0520313	FALSE	FALSE	FALSE	CffBSP	32424244	0.000989122	0.0564863	TRUE	reported	textfile	10	32713172	0.0407	0.00104	11330	GCST90274774.txt	TRUE	reported	textfile	TRUE	0.000948706	10.7571	7.9213
	rs138930563	A	G	A	G	-0.0791	-0.0559214	0.929	0.0930981	FALSE	FALSE	FALSE	CffBSP	186184853	0.176142	0.0413397	TRUE	reported	textfile	4	187106007	0.0242	0.00108	14287	GCST90274774.txt	TRUE	reported	textfile	TRUE	0.000747234	10.6822	7.9213
	rs139047667	T	C	T	C	-0.1271	-0.168116	0.0306	0.97964	FALSE	FALSE	FALSE	CffBSP	8608506	0.0498701	0.0857263	TRUE	reported	textfile	9	8608506	0.0387	0.00102	14287	GCST90274774.txt	TRUE	reported	textfile	TRUE	0.000754398	10.7847	7.9213
	rs140252491	A	T	A	T	0.3238	0.680003	0.99	0.999511	FALSE	TRUE	FALSE	CffBSP	76822648	0.211469	0.544204	TRUE	reported	textfile	9	79437564	0.0851	0.000142	10537	GCST90274774.txt	TRUE	reported	textfile	TRUE	0.00137209	14.4748	7.9213
	rs140373497	T	C	T	C	-0.3833	-0.10975	0.0061	0.993602	FALSE	FALSE	FALSE	CffBSP	223737238	0.461431	0.149018	TRUE	reported	textfile	2	224601955	0.1173	0.00108	11403	GCST90274774.txt	TRUE	reported	textfile	TRUE	0.000935526	10.6759	7.9213
	rs140551976	A	C	A	C	0.315	0.0971532	0.9879	0.00550009	FALSE	FALSE	FALSE	CffBSP	54108298	0.548766	0.162027	TRUE	reported	textfile	16	54142210	0.0729	1.55e-05	11438	GCST90274774.txt	TRUE	reported	textfile	TRUE	0.0016297	18.6677	7.9213
	rs140707482	T	C	T	C	0.2238	-0.0402851	0.985	0.0120784	FALSE	FALSE	FALSE	CffBSP	20242186	0.706719	0.107066	TRUE	reported	textfile	19	20352995	0.0577	0.000105	12736	GCST90274774.txt	TRUE	reported	textfile	TRUE	0.00117984	15.0418	7.9213
	rs141176720	A	C	A	C	-0.1534	0.0820031	0.9769	0.0106961	FALSE	FALSE	FALSE	CffBSP	142804502	0.468849	0.113209	TRUE	reported	textfile	4	143725655	0.0467	0.00102	14287	GCST90274774.txt	TRUE	reported	textfile	TRUE	0.000754654	10.7884	7.9213
	rs141543178	A	T	A	T	0.1424	0.207317	0.9706	0.991209	FALSE	TRUE	FALSE	CffBSP	108798164	0.104001	0.12752	TRUE	reported	textfile	5	108133865	0.0375	0.000146	14734	GCST90274774.txt	TRUE	reported	textfile	TRUE	0.000977714	14.4178	7.9213
	rs1419305	A	G	A	G	-0.0532	-0.0481261	0.139	0.888513	FALSE	FALSE	FALSE	CffBSP	223725046	0.202074	0.0377263	TRUE	reported	textfile	1	223912748	0.0168	0.00154	14733	GCST90274774.txt	TRUE	reported	textfile	TRUE	0.000680171	10.0264	7.9213
	rs1421954	T	G	T	G	-0.0434	0.0326807	0.279	0.698907	FALSE	FALSE	FALSE	CffBSP	160673104	0.202587	0.0256477	TRUE	reported	textfile	5	160100111	0.0132	0.00101	14287	GCST90274774.txt	TRUE	reported	textfile	TRUE	0.00075607	10.8086	7.9213
	rs142436993	A	G	A	G	-0.1712	0.0351652	0.9796	0.00898402	FALSE	FALSE	FALSE	CffBSP	39872843	0.779586	0.125654	TRUE	reported	textfile	14	40342047	0.0535	0.00137	14287	GCST90274774.txt	TRUE	reported	textfile	TRUE	0.000716222	10.2386	7.9213
	rs1424989	A	C	A	C	-0.0484	0.000883682	0.6936	0.320886	FALSE	FALSE	FALSE	CffBSP	53200245	0.971879	0.0250678	TRUE	reported	textfile	2	53427383	0.0125	0.000108	14719	GCST90274774.txt	TRUE	reported	textfile	TRUE	0.00101754	14.9903	7.9213
	rs142917009	A	T	A	T	-0.2432	0.0151498	0.0127	0.00285375	FALSE	TRUE	FALSE	CffBSP	23382427	0.947705	0.230979	TRUE	reported	textfile	5	23382536	0.0742	0.00105	11925	GCST90274774.txt	TRUE	reported	textfile	TRUE	0.000900057	10.741	7.9213
	rs142917459	A	G	A	G	-0.1654	0.13213	0.0246	0.988191	FALSE	FALSE	FALSE	CffBSP	39733198	0.234727	0.111195	TRUE	reported	textfile	19	40223838	0.0442	0.000183	14287	GCST90274774.txt	TRUE	reported	textfile	TRUE	0.000979174	14.0012	7.9213
	rs143097378	T	C	T	C	-0.1461	0.109511	0.9654	0.0192188	FALSE	FALSE	FALSE	CffBSP	117662580	0.207595	0.0868992	TRUE	reported	textfile	6	117983743	0.034	1.73e-05	14287	GCST90274774.txt	TRUE	reported	textfile	TRUE	0.00129075	18.4621	7.9213
	rs143170029	T	C	T	C	0.315	0.0394291	0.9911	0.0287919	FALSE	FALSE	FALSE	CffBSP	7581557	0.575118	0.0703427	TRUE	reported	textfile	7	7621188	0.0816	0.000113	11403	GCST90274774.txt	TRUE	reported	textfile	TRUE	0.00130513	14.8993	7.9213
	rs143307372	A	G	A	G	-0.1608	-0.0753994	0.0175	0.996209	FALSE	FALSE	FALSE	CffBSP	129863011	0.695562	0.19268	TRUE	reported	textfile	2	130620584	0.0501	0.00133	12934	GCST90274774.txt	TRUE	reported	textfile	TRUE	0.000795826	10.2998	7.9213
	rs143368848	A	G	A	G	0.1401	-0.0425102	0.974	0.0141637	FALSE	FALSE	FALSE	CffBSP	160869828	0.677549	0.102235	TRUE	reported	textfile	6	161290860	0.0429	0.00109	14287	GCST90274774.txt	TRUE	reported	textfile	TRUE	0.000745927	10.6635	7.9213
	rs143624989	A	G	A	G	-0.2479	0.051859	0.0119	0.979122	FALSE	FALSE	FALSE	CffBSP	87476148	0.525942	0.0817691	TRUE	reported	textfile	1	87941831	0.0756	0.00104	13800	GCST90274774.txt	TRUE	reported	textfile	TRUE	0.00077856	10.7509	7.9213
	rs143857188	A	C	A	C	-0.2219	-0.651029	0.0096	0.997975	FALSE	FALSE	FALSE	CffBSP	96824709	0.0152525	0.268318	TRUE	reported	textfile	1	97290265	0.0682	0.00114	12934	GCST90274774.txt	TRUE	reported	textfile	TRUE	0.00081782	10.5847	7.9213
	rs143914431	A	G	A	G	-0.1043	0.0250942	0.9407	0.0223946	FALSE	FALSE	FALSE	CffBSP	89119692	0.754545	0.0802623	TRUE	reported	textfile	16	89186100	0.028	0.000195	13223	GCST90274774.txt	TRUE	reported	textfile	TRUE	0.00104826	13.8735	7.9213
	rs143975306	A	G	A	G	0.1261	0.0774909	0.0273	0.974797	FALSE	FALSE	FALSE	CffBSP	128319517	0.309301	0.0762188	TRUE	reported	textfile	11	128189412	0.0386	0.00109	14727	GCST90274774.txt	TRUE	reported	textfile	TRUE	0.000724147	10.6708	7.9213
	rs144142913	A	T	A	T	0.1751	-0.250332	0.9809	0.995147	FALSE	TRUE	FALSE	CffBSP	122039888	0.145062	0.17179	TRUE	reported	textfile	9	124802167	0.055	0.00145	11917	GCST90274774.txt	TRUE	reported	textfile	TRUE	0.000849788	10.1338	7.9213
	rs144762127	T	C	T	C	-0.1369	-0.165046	0.0299	0.992973	FALSE	FALSE	FALSE	CffBSP	111537317	0.262755	0.147375	TRUE	reported	textfile	2	112294894	0.0417	0.00103	14287	GCST90274774.txt	TRUE	reported	textfile	TRUE	0.000753818	10.7764	7.9213
	rs144800702	T	C	T	C	-0.1505	-0.054655	0.9463	0.0414362	FALSE	FALSE	FALSE	CffBSP	61250970	0.429323	0.0691529	TRUE	reported	textfile	11	61018442	0.035	1.71e-05	12060	GCST90274774.txt	TRUE	reported	textfile	TRUE	0.00153082	18.4869	7.9213
	rs1450144	T	C	T	C	-0.0412	0.0129752	0.7042	0.29018	FALSE	FALSE	FALSE	CffBSP	182204477	0.618055	0.0260229	TRUE	reported	textfile	4	183125630	0.013	0.00153	14286	GCST90274774.txt	TRUE	reported	textfile	TRUE	0.000702574	10.0426	7.9213
	rs1452855	A	G	A	G	0.0453	-0.0197305	0.4839	0.514856	FALSE	FALSE	FALSE	CffBSP	128950921	0.402178	0.0235522	TRUE	reported	textfile	10	130749185	0.0119	0.000141	14287	GCST90274774.txt	TRUE	reported	textfile	TRUE	0.00101326	14.4891	7.9213
	rs145419144	A	G	A	G	-0.1887	-0.175731	0.0162	0.998467	FALSE	FALSE	FALSE	CffBSP	160043542	0.5632	0.303982	TRUE	reported	textfile	2	160900053	0.0593	0.00146	13800	GCST90274774.txt	TRUE	reported	textfile	TRUE	0.000733224	10.1245	7.9213
	rs145462433	T	C	T	C	0.1338	-0.00871844	0.0257	0.977676	FALSE	FALSE	FALSE	CffBSP	94585279	0.910372	0.0774497	TRUE	reported	textfile	5	93920984	0.0407	0.00101	14729	GCST90274774.txt	TRUE	reported	textfile	TRUE	0.000733215	10.806	7.9213
	rs145988648	CA	C	CA	C	-0.1844	0.231594	0.0211	0.989913	FALSE	FALSE	FALSE	CffBSP	66477859	0.0476014	0.116913	TRUE	reported	textfile	2	66704991	0.048	0.000122	10849	GCST90274774.txt	TRUE	reported	textfile	TRUE	0.0013585	14.7557	7.9213
	rs1459951	A	C	A	C	-0.0515	-0.0100647	0.1654	0.777318	FALSE	FALSE	FALSE	CffBSP	81871533	0.724309	0.0285356	TRUE	reported	textfile	11	81582575	0.016	0.00129	14728	GCST90274774.txt	TRUE	reported	textfile	TRUE	0.000702951	10.3589	7.9213
	rs146003241	T	G	T	G	0.2212	-0.253966	0.013	0.992381	FALSE	FALSE	FALSE	CffBSP	84076921	0.0668159	0.138559	TRUE	reported	textfile	15	84745673	0.0675	0.00105	14287	GCST90274774.txt	TRUE	reported	textfile	TRUE	0.000751096	10.7375	7.9213
	rs146089429	CA	C	CA	C	-0.0809	-0.103915	0.092	0.928998	FALSE	FALSE	FALSE	CffBSP	137976583	0.0248342	0.0463086	TRUE	reported	textfile	8	138988826	0.0252	0.00133	10894	GCST90274774.txt	TRUE	reported	textfile	TRUE	0.000945144	10.3042	7.9213
	rs146604894	A	T	A	T	0.1345	-0.055748	0.968	0.982322	FALSE	TRUE	FALSE	CffBSP	82654487	0.522264	0.0871253	TRUE	reported	textfile	9	85269402	0.0424	0.00151	14287	GCST90274774.txt	TRUE	reported	textfile	TRUE	0.000703827	10.0613	7.9213
	rs146741657	T	C	T	C	0.194	0.272061	0.9818	0.00328649	FALSE	FALSE	FALSE	CffBSP	128839527	0.191069	0.20809	TRUE	reported	textfile	3	128558370	0.0508	0.000134	13500	GCST90274774.txt	TRUE	reported	textfile	TRUE	0.00107913	14.5818	7.9213
	rs146800659	A	G	A	G	0.1269	-0.0594391	0.0257	0.971882	FALSE	FALSE	FALSE	CffBSP	60129520	0.399441	0.0705409	TRUE	reported	textfile	11	59896993	0.0392	0.00121	14728	GCST90274774.txt	TRUE	reported	textfile	TRUE	0.000711047	10.4783	7.9213
	rs146931993	C	G	C	G	-0.2988	-0.381023	0.0117	0.000774915	FALSE	TRUE	FALSE	CffBSP	35118282	0.450837	0.505322	TRUE	reported	textfile	7	35157894	0.079	0.000155	10374	GCST90274774.txt	TRUE	reported	textfile	TRUE	0.00137709	14.3029	7.9213
	rs146951952	A	G	A	G	-0.2342	-0.0953259	0.0108	0.99321	FALSE	FALSE	FALSE	CffBSP	16520626	0.503065	0.142346	TRUE	reported	textfile	11	16542173	0.0627	0.000188	13800	GCST90274774.txt	TRUE	reported	textfile	TRUE	0.00101	13.95	7.9213
	rs146977878	T	G	T	G	-0.2517	0.0913514	0.9861	0.0123892	FALSE	FALSE	FALSE	CffBSP	50416714	0.392963	0.106937	TRUE	reported	textfile	10	52176474	0.0589	1.93e-05	14287	GCST90274774.txt	TRUE	reported	textfile	TRUE	0.00127656	18.2589	7.9213
	rs147031939	T	C	T	C	-0.1403	0.0487672	0.0229	0.987641	FALSE	FALSE	FALSE	CffBSP	43031112	0.647945	0.1068	TRUE	reported	textfile	22	43427118	0.0439	0.00139	14723	GCST90274774.txt	TRUE	reported	textfile	TRUE	0.000693248	10.2124	7.9213
	rs147074073	T	C	T	C	-0.1517	-0.191424	0.0203	0.989352	FALSE	FALSE	FALSE	CffBSP	50914866	0.0795921	0.109194	TRUE	reported	textfile	16	50948777	0.0478	0.00151	14724	GCST90274774.txt	TRUE	reported	textfile	TRUE	0.000683585	10.0706	7.9213
	rs1471545	T	C	T	C	-0.039	-0.000734834	0.5752	0.4619	FALSE	FALSE	FALSE	CffBSP	136150569	0.975252	0.0236874	TRUE	reported	textfile	6	136471707	0.0121	0.00127	14287	GCST90274774.txt	TRUE	reported	textfile	TRUE	0.000726611	10.3872	7.9213
	rs147278277	A	T	A	T	-0.1717	-0.0440182	0.9831	0.982927	FALSE	TRUE	FALSE	CffBSP	68631674	0.621198	0.0890782	TRUE	reported	textfile	13	69205806	0.0535	0.00133	14287	GCST90274774.txt	TRUE	reported	textfile	TRUE	0.000720409	10.2985	7.9213
	rs147284305	A	G	A	G	-0.1579	-0.118039	0.015	0.971311	FALSE	FALSE	FALSE	CffBSP	207015612	0.0998481	0.0717304	TRUE	reported	textfile	1	207188957	0.0497	0.00149	14731	GCST90274774.txt	TRUE	reported	textfile	TRUE	0.000684734	10.0924	7.9213
	rs147481415	T	C	T	C	0.1616	0.165086	0.9793	0.0123388	FALSE	FALSE	FALSE	CffBSP	154095293	0.138587	0.111464	TRUE	reported	textfile	4	155016445	0.0507	0.00144	13800	GCST90274774.txt	TRUE	reported	textfile	TRUE	0.000735645	10.1579	7.9213
	rs147680378	A	C	A	C	-0.21	-0.23047	0.9885	0.00345647	FALSE	FALSE	FALSE	CffBSP	178351183	0.246453	0.198851	TRUE	reported	textfile	1	178320318	0.066	0.00146	12634	GCST90274774.txt	TRUE	reported	textfile	TRUE	0.000800686	10.1224	7.9213
	rs147773045	T	C	T	C	0.2138	-0.0638466	0.9854	0.00246283	FALSE	FALSE	FALSE	CffBSP	108774443	0.791724	0.241778	TRUE	reported	textfile	13	109426791	0.0655	0.0011	11138	GCST90274774.txt	TRUE	reported	textfile	TRUE	0.000955675	10.6526	7.9213
	rs147828443	A	G	A	G	0.29	0.108301	0.9918	0.0139753	FALSE	FALSE	FALSE	CffBSP	178696180	0.295745	0.103578	TRUE	reported	textfile	3	178413968	0.0756	0.000125	13800	GCST90274774.txt	TRUE	reported	textfile	TRUE	0.00106515	14.7126	7.9213
[truncated: 6,031 more rows]

## Sheet: S4.2
The IVs SNPs involved in immune cells phenotypes to AAA of UK Biobank database.
[truncated: 7,526 more rows]

[truncated: 2 more sheets: S4.3, S4.4]
