# Supplementary material
Source: Frontiers journal article supplement (https://www.frontiersin.org/articles/1413183)
Supplement: Table_5.xlsx [file Table_5.xlsx]

## Sheet: Content
Content
S5.1. The resluts of forward univariable MR analysis between 1400 phenotypes of metabolites and the risk of AAA in FinnGen database.
S5.2. The resluts of forward univariable MR analysis between 1400 phenotypes of metabolites and the risk of AAA in UK Biobank database.

## Sheet: S5.1
The resluts of forward univariable MR analysis between 1400 phenotypes of metabolites and the risk of AAA in FinnGen database.
id	nsnp	MR-Egger			Weighted median			Inverse variance weighted			Simple mode			Weighted mode			MR-Egger intercept		MR-PRESSO global	MR-IVW			MR-Egeer
		p_value	OR	95% OR	p_value	OR	95% OR	p_value	OR	95% OR	p_value	OR	95% OR	p_value	OR	95% OR	egger intercept	p_value	p_value	Q	Q_df	Q_pval	Q	Q_df	Q_pval
GCST90200078	24	0.0144721	0.80474	0.68549-0.9447	0.182591	0.91443	0.80171-1.04299	0.001128	0.85619	0.77980-0.94006	0.237931	0.83315	0.62014-1.11933	0.236324	0.92200	0.80888-1.05094	0.01166	0.36084	0.375	23.50608	23	0.43156	22.61102	22	0.42396
GCST90200126	26	0.0108752	1.33443	1.08728-1.6378	0.054891	1.18604	0.99643-1.41174	0.00115535	1.21087	1.07889-1.35899	0.800226	0.94815	0.63048-1.42588	0.015208	1.50454	1.10659-2.04559	-0.01394	0.27153	0.56	22.81606	25	0.58830	21.54946	24	0.60614
GCST90200042	22	0.0346589	1.06904	1.00907-1.1326	0.0446135	1.07935	1.00184-1.16286	0.00181507	1.08291	1.03004-1.13850	0.0624496	1.26373	1.00092-1.59554	0.0221178	1.07944	1.01594-1.14692	0.00775	0.39005	0.696	19.77929	21	0.53528	19.00734	20	0.52135
GCST90199725	19	0.126443	0.81722	0.63890-1.0453	0.00400918	0.82051	0.71707-0.93887	0.00466546	0.85003	0.75954-0.95131	0.75236	0.95064	0.69745-1.29573	0.00966388	0.79934	0.68685-0.93025	0.00746	0.72708	0.123	26.42593	18	0.09041	26.23165	17	0.07034
GCST90200190	24	0.040024	1.06820	1.00675-1.1334	0.0300875	1.07344	1.00685-1.14443	0.00628949	1.07091	1.01955-1.12486	0.208155	1.15182	0.93000-1.42655	0.017959	1.07277	1.01635-1.13231	0.00166	0.87558	0.579	24.70194	23	0.36583	24.67380	22	0.31293
GCST90200097	15	0.702097	1.05510	0.80639-1.3805	0.148799	1.12870	0.95764-1.33031	0.00663508	1.19630	1.05109-1.36158	0.610514	1.07924	0.81009-1.43781	0.104466	1.16321	0.98070-1.37967	0.02702	0.31561	0.326	17.02130	14	0.25504	15.70515	13	0.26542
GCST90200412	21	0.39777	0.85020	0.58863-1.2280	0.0168039	0.76919	0.62031-0.95380	0.00704055	0.81909	0.70843-0.94703	0.104731	0.72760	0.50421-1.04996	0.0839009	0.75058	0.55099-1.02247	-0.00461	0.83109	0.596	18.63911	20	0.54538	18.59234	19	0.48325
GCST90200284	19	0.154619	0.73994	0.49785-1.0997	0.0180194	0.76116	0.60710-0.95432	0.0072498	0.78595	0.65923-0.93702	0.107916	0.70221	0.46622-1.05764	0.13354	0.73427	0.49948-1.07942	0.00879	0.74169	0.126	25.16951	18	0.12032	25.00440	17	0.09461
GCST90200763	31	0.137624	0.84151	0.67431-1.0502	0.259561	0.90943	0.77107-1.07262	0.00745063	0.85587	0.76365-0.95921	0.462673	0.89755	0.67515-1.19322	0.38547	0.89755	0.70566-1.14162	0.00247	0.86263	0.594	27.88772	30	0.57639	27.85724	29	0.52556
GCST90199831	27	0.0778156	1.26559	0.98463-1.6267	0.00132938	1.24201	1.08804-1.41776	0.00745806	1.17710	1.04458-1.32644	0.433814	1.12125	0.84560-1.48676	0.0119227	1.22378	1.05713-1.41671	-0.01164	0.52441	0.033	42.35083	26	0.02258	41.65629	25	0.01956
GCST90199622	18	0.0251926	0.86983	0.77867-0.9717	0.063323	0.90095	0.80702-1.00581	0.00971983	0.89498	0.82279-0.97351	0.292687	0.89009	0.72138-1.09826	0.0565098	0.90161	0.81646-0.99564	0.01244	0.44899	0.9	10.75351	17	0.86909	10.15112	16	0.85862
GCST90200480	27	0.0476084	0.80264	0.65266-0.9871	0.000662479	0.77878	0.67438-0.89934	0.0101448	0.87369	0.78823-0.96843	0.107395	0.79399	0.60542-1.04128	0.00219031	0.75695	0.64466-0.88880	0.01351	0.36251	0.377	26.59139	26	0.43100	25.70673	25	0.42338
GCST90200045	32	0.112824	1.12438	0.97684-1.2942	0.0225685	1.12591	1.01681-1.24670	0.0101775	1.10503	1.02398-1.19250	0.550001	1.06990	0.85937-1.33200	0.0343099	1.12357	1.01346-1.24565	-0.00369	0.77423	0.136	38.76771	31	0.15925	38.65975	30	0.13354
GCST90200247	20	0.394358	1.14282	0.84675-1.5424	0.298486	1.09560	0.92236-1.30139	0.0113444	1.17578	1.03725-1.33280	0.503102	1.10217	0.83356-1.45732	0.531028	1.07610	0.85905-1.34799	0.00391	0.84018	0.743	14.84994	19	0.73209	14.80808	18	0.67510
GCST90200133	19	0.0341212	0.78377	0.63704-0.9643	0.121164	0.88149	0.75152-1.03394	0.0115026	0.86738	0.77676-0.96858	0.264405	0.87445	0.69600-1.09867	0.307135	0.90408	0.74910-1.09112	0.02103	0.27321	0.603	15.88813	18	0.60035	14.60595	17	0.62384
GCST90200471	25	0.0748784	1.06418	0.99686-1.1360	0.0887785	1.06504	0.99049-1.14519	0.0127748	1.07109	1.01472-1.13058	0.190579	1.13071	0.94562-1.35202	0.0756456	1.06523	0.99650-1.13870	0.00320	0.73317	0.654	22.43168	24	0.55352	22.31260	23	0.50145
GCST90200311	19	0.0102409	0.75804	0.62808-0.9149	0.0100636	0.82545	0.71325-0.95529	0.0133256	0.87358	0.78491-0.97227	0.59845	1.08728	0.80072-1.47638	0.00372187	0.78600	0.68214-0.90566	0.02576	0.08995	0.671	12.39171	18	0.82637	9.15871	17	0.93515
GCST90200393	25	0.042344	0.78623	0.63141-0.9790	0.123472	0.88097	0.74977-1.03513	0.0135609	0.86934	0.77788-0.97156	0.602723	0.93113	0.71426-1.21386	0.420901	0.91096	0.72871-1.13878	0.01496	0.30830	0.725	19.91610	24	0.70154	18.83058	23	0.71101
GCST90200798	23	0.844899	0.96724	0.69560-1.3449	0.123459	1.14072	0.96477-1.34876	0.0138788	1.15713	1.03013-1.29978	0.525822	1.10086	0.82195-1.47441	0.490436	1.11311	0.82506-1.50171	0.02306	0.26756	0.712	18.36918	22	0.68389	17.07204	21	0.70673
GCST90200445	22	0.0195686	1.09703	1.02132-1.1784	0.0353484	1.09103	1.00599-1.18325	0.0154178	1.07701	1.01426-1.14363	0.886594	0.98262	0.77452-1.24664	0.02961	1.09086	1.01403-1.17351	-0.00885	0.36406	0.781	13.31816	21	0.89707	12.45545	20	0.89951
GCST90200721	19	0.300167	0.92737	0.80759-1.0649	0.190041	0.91445	0.79996-1.04532	0.0154785	0.89546	0.81888-0.97919	0.3715	0.90548	0.73227-1.11967	0.283644	0.93078	0.81959-1.05706	-0.00934	0.51929	0.386	20.20600	18	0.32134	19.70402	17	0.28965
GCST90199984	26	0.373239	1.10498	0.89064-1.3709	0.218954	1.09749	0.94621-1.27297	0.0158326	1.13885	1.02470-1.26572	0.728333	1.04480	0.81816-1.33421	0.610073	1.06375	0.84137-1.34491	0.00499	0.75563	0.695	21.65194	25	0.65575	21.55284	24	0.60594
GCST90200075	22	0.308	1.19371	0.85668-1.6634	0.0710111	1.17067	0.98660-1.38909	0.0158575	1.18544	1.03240-1.36116	0.29534	1.17300	0.87648-1.56983	0.199922	1.14873	0.93548-1.41059	-0.00099	0.96420	0.173	28.20389	21	0.13446	28.20098	20	0.10473
GCST90199784	27	0.0961869	1.20028	0.97588-1.4763	0.0906977	1.13858	0.97963-1.32332	0.0171932	1.12732	1.02148-1.24412	0.0635016	1.26698	0.99737-1.60947	0.0682855	1.15338	0.99567-1.33606	-0.01005	0.50561	0.734	22.76185	26	0.64638	22.30566	25	0.61804
GCST90199882	24	0.0050495	1.43362	1.14286-1.7984	0.0315902	1.23763	1.01898-1.50320	0.0179854	1.18373	1.02936-1.36124	0.957796	1.01109	0.67504-1.51443	0.125038	1.32115	0.93765-1.86151	-0.03120	0.05459	0.102	31.38512	23	0.11362	26.43257	22	0.23357
GCST90200531	15	0.103461	0.73764	0.52472-1.0370	0.155	0.85871	0.69610-1.05931	0.0191634	0.81731	0.69036-0.96761	0.281976	0.82660	0.59216-1.15387	0.139913	0.80507	0.61361-1.05626	0.01325	0.50598	0.29	18.36443	14	0.19068	17.72646	13	0.16818
GCST90199883	18	0.173288	0.85539	0.69004-1.0604	0.0282996	0.85489	0.74311-0.98347	0.0217707	0.87427	0.77945-0.98061	0.138817	0.80838	0.61806-1.05731	0.0359371	0.85085	0.74045-0.97771	0.00451	0.81453	0.334	20.31694	17	0.25834	20.24497	16	0.20939
GCST90200680	21	0.27083	0.93611	0.83518-1.0492	0.0227665	0.90511	0.83068-0.98620	0.021866	0.91160	0.84226-0.98666	0.803623	1.03593	0.78722-1.36321	0.0330653	0.89928	0.82114-0.98484	-0.00811	0.52872	0.338	24.01808	20	0.24160	23.50856	19	0.21568
GCST90199662	17	0.689854	1.08930	0.72142-1.6448	0.117388	1.18925	0.95731-1.47740	0.0223057	1.22565	1.02937-1.45936	0.296966	1.20174	0.86043-1.67842	0.232075	1.20174	0.89925-1.60597	0.01813	0.54332	0.19	21.70439	16	0.15300	21.15877	15	0.13183
GCST90199760	34	0.0417831	0.84311	0.72010-0.9871	0.00202222	0.81975	0.72256-0.93001	0.0223191	0.90093	0.82381-0.98528	0.422693	0.88947	0.67039-1.18015	0.00318365	0.81839	0.72334-0.92593	0.01207	0.32432	0.284	35.50954	33	0.35083	34.43132	32	0.35216
GCST90199995	26	0.00878931	1.34332	1.09673-1.6454	0.0358098	1.19375	1.01180-1.40842	0.02335	1.13405	1.01721-1.26431	0.443599	1.11826	0.84396-1.48172	0.0653966	1.20116	0.99688-1.44730	-0.02776	0.06897	0.344	27.51787	25	0.33052	23.89279	24	0.46774
GCST90199936	25	0.999206	1.00008	0.85099-1.1753	0.20925	0.91934	0.80624-1.04831	0.0235296	0.90353	0.82758-0.98644	0.547321	0.93584	0.75636-1.15791	0.778993	0.97682	0.83077-1.14856	-0.02288	0.15539	0.635	21.32705	24	0.61936	19.16923	23	0.69136
GCST90200607	15	0.244033	1.16605	0.91108-1.4924	0.100019	1.19410	0.96657-1.47519	0.0241266	1.18059	1.02196-1.36383	0.113727	1.28554	0.96019-1.72113	0.132287	1.19643	0.96023-1.49072	0.00209	0.90525	0.965	6.42612	14	0.95458	6.41139	13	0.92989
GCST90200855	33	0.663648	0.95078	0.75900-1.1910	0.153169	0.89777	0.77428-1.04095	0.0251785	0.88582	0.79660-0.98502	0.838851	0.97378	0.75531-1.25542	0.284189	0.90226	0.74982-1.08570	-0.00959	0.49032	0.839	24.08281	32	0.84140	23.59546	31	0.82670
GCST90200337	19	0.832616	1.03893	0.73299-1.4726	0.0255976	1.26131	1.02872-1.54648	0.0260891	1.17367	1.01925-1.35148	0.148895	1.30601	0.92311-1.84773	0.103381	1.31035	0.96224-1.78440	0.01763	0.46400	0.708	14.59549	18	0.68953	14.03426	17	0.66468
GCST90199774	26	0.094496	1.19332	0.97801-1.4560	0.0286912	1.18385	1.01772-1.37710	0.0288579	1.12915	1.01261-1.25911	0.0695866	1.29918	0.99119-1.70286	0.0315892	1.26306	1.03307-1.54425	-0.00856	0.52146	0.578	23.46063	25	0.55068	23.03730	24	0.51760
GCST90200351	23	0.147143	0.88802	0.76080-1.0365	0.000226128	0.83925	0.76462-0.92117	0.0297933	0.89553	0.81069-0.98925	0.502638	0.88268	0.61651-1.26376	0.00107235	0.84247	0.77051-0.92114	0.00201	0.88859	0.078	37.85015	22	0.01904	37.81394	21	0.01355
GCST90200162	17	0.298302	1.10384	0.92226-1.3212	0.240268	1.09593	0.94055-1.27698	0.0303176	1.12556	1.01131-1.25271	0.437162	1.09159	0.87994-1.35416	0.357324	1.09159	0.91065-1.30848	0.00476	0.79503	0.927	9.12127	16	0.90834	9.05134	15	0.87482
GCST90199632	22	0.0895516	1.23605	0.97935-1.5600	0.160521	1.13266	0.95179-1.34792	0.0306901	1.14542	1.01271-1.29552	0.297927	1.14881	0.89046-1.48211	0.2577	1.13802	0.91529-1.41495	-0.01270	0.45876	0.863	14.56083	21	0.84433	13.99005	20	0.83100
GCST90200157	27	0.873156	0.98141	0.78136-1.2327	0.386048	0.93490	0.80290-1.08861	0.0308868	0.88090	0.78509-0.98840	0.277996	0.86041	0.65949-1.12255	0.32131	0.91691	0.77498-1.08483	-0.01613	0.29251	0.168	34.13583	26	0.13164	32.62682	25	0.14066
GCST90199932	22	0.0856888	0.93088	0.86133-1.0060	0.03713	0.92244	0.85501-0.99520	0.0309429	0.93103	0.87252-0.99347	0.510242	1.09470	0.84008-1.42648	0.0645336	0.93255	0.86936-1.00032	0.00009	0.99353	0.292	27.47100	21	0.15580	27.47090	20	0.12253
GCST90200092	22	0.415596	1.07727	0.90389-1.2839	0.128818	1.10725	0.97084-1.26283	0.03097	1.10598	1.00926-1.21196	0.287614	1.13459	0.90433-1.42348	0.230552	1.12653	0.93242-1.36104	0.00520	0.73423	0.634	18.49935	21	0.61722	18.38082	20	0.56234
GCST90200990	26	0.0569893	1.13272	1.00247-1.2799	0.132561	1.08651	0.97516-1.21058	0.0311246	1.08852	1.00772-1.17579	0.26403	1.10638	0.93023-1.31590	0.0837404	1.09734	0.99185-1.21406	-0.00842	0.41828	0.572	24.48851	25	0.49131	23.81020	24	0.47249
GCST90200997	30	0.317405	1.12656	0.89559-1.4171	0.466165	1.06292	0.90204-1.25250	0.0312234	1.12824	1.01094-1.25915	0.545964	1.11107	0.79251-1.55768	0.811693	1.02462	0.84033-1.24932	0.00019	0.98851	0.694	24.60663	29	0.69849	24.60642	28	0.64916
GCST90200842	16	0.570243	1.12797	0.75159-1.6928	0.408801	0.91389	0.73806-1.13159	0.0321527	0.84755	0.72854-0.98601	0.707618	0.93885	0.67936-1.29747	0.676294	0.93582	0.68958-1.26999	-0.03847	0.15919	0.572	13.32175	15	0.57746	11.11060	14	0.67733
GCST90200726	32	0.0140035	0.86475	0.77533-0.9645	0.00169492	0.87075	0.79866-0.94934	0.03347	0.92423	0.85949-0.99385	0.353592	1.12949	0.87664-1.45526	0.00174177	0.86108	0.79048-0.93798	0.01549	0.12634	0.208	35.53330	31	0.26315	32.82778	30	0.33006
GCST90200615	20	0.44599	1.14484	0.81466-1.6089	0.0576191	1.20766	0.99392-1.46737	0.0341682	1.16086	1.01119-1.33268	0.324426	1.19197	0.84821-1.67504	0.181491	1.23321	0.91705-1.65836	0.00214	0.93080	0.45	19.05356	19	0.45340	19.04536	18	0.38904
GCST90200984	14	0.725161	1.12501	0.59234-2.1367	0.0443549	1.29100	1.00646-1.65597	0.0351588	1.28860	1.01779-1.63146	0.24687	1.29960	0.85084-1.98505	0.162153	1.29252	0.92059-1.81472	0.01837	0.66187	0.019	27.19259	13	0.01171	26.74453	12	0.00841
GCST90200684	16	0.29177	0.93572	0.83085-1.0538	0.166735	0.92916	0.83727-1.03115	0.0365264	0.90771	0.82895-0.99395	0.471321	0.89953	0.67928-1.19119	0.214585	0.93059	0.83466-1.03755	-0.01203	0.45060	0.76	10.14235	15	0.81069	9.54002	14	0.79498
GCST90200787	24	0.082478	0.89960	0.80270-1.0082	0.0624202	0.91584	0.83495-1.00457	0.0366249	0.92249	0.85527-0.99500	0.748436	0.96722	0.79091-1.18284	0.121946	0.92548	0.84201-1.01722	0.00684	0.56479	0.566	23.00008	23	0.46077	22.64829	22	0.42181
GCST90199834	16	0.0627107	0.69337	0.48619-0.9888	0.492794	0.92980	0.75520-1.14478	0.0367756	0.84122	0.71521-0.98944	0.747249	1.07374	0.70211-1.64209	0.799523	1.05507	0.70269-1.58416	0.02636	0.25167	0.169	20.81930	15	0.14270	18.89020	14	0.16919
GCST90200370	21	0.996136	1.00101	0.66969-1.4962	0.683236	0.95522	0.76655-1.19034	0.0371324	0.84403	0.71963-0.98994	0.994104	0.99873	0.71634-1.39245	0.866174	0.97773	0.75496-1.26624	-0.02206	0.37583	0.196	25.98952	20	0.16616	24.91122	19	0.16349
GCST90200693	23	0.923126	0.98913	0.79434-1.2317	0.377989	1.07646	0.91381-1.26807	0.037522	1.12655	1.00690-1.26042	0.334419	1.15704	0.86604-1.54581	0.226536	1.12181	0.93601-1.34449	0.02129	0.19030	0.767	16.86765	22	0.77062	15.03578	21	0.82115
GCST90199830	22	0.283935	0.88707	0.71667-1.0980	0.0954681	0.86094	0.72198-1.02664	0.0380287	0.87882	0.77786-0.99289	0.287285	0.85008	0.63508-1.13787	0.20108	0.86428	0.69596-1.07330	-0.00136	0.91772	0.823	15.60159	21	0.79160	15.59064	20	0.74167
GCST90200204	17	0.735114	0.91052	0.53432-1.5516	0.0565414	0.79690	0.63104-1.00635	0.0381336	0.84345	0.71806-0.99073	0.958456	1.01059	0.68410-1.49290	0.113368	0.72944	0.50427-1.05515	-0.00807	0.77193	0.946	8.06433	16	0.94693	7.97722	15	0.92469
GCST90200797	21	0.0930397	1.23003	0.97782-1.5473	0.00278937	1.24380	1.07805-1.43502	0.0406546	1.13692	1.00547-1.28554	0.819369	1.03376	0.78034-1.36948	0.00598217	1.23095	1.07823-1.40530	-0.01596	0.43412	0.109	29.71158	20	0.07466	28.74554	19	0.07009
GCST90200387	36	0.644004	1.04935	0.85699-1.2849	0.420225	1.05981	0.92020-1.22059	0.0418526	1.10400	1.00365-1.21437	0.714435	1.04920	0.81290-1.35418	0.826341	1.02337	0.83382-1.25602	0.00749	0.58131	0.899	25.15758	35	0.89017	24.84755	34	0.87408
GCST90200374	22	0.271124	1.23542	0.85666-1.7816	0.0626626	1.18682	0.99099-1.42135	0.0434235	1.14645	1.00404-1.30907	0.273095	1.21845	0.86372-1.71886	0.269854	1.18581	0.88310-1.59227	-0.00921	0.67234	0.761	15.90569	21	0.77493	15.72144	20	0.73375
GCST90199780	28	0.53045	1.09766	0.82361-1.4629	0.15458	1.12223	0.95747-1.31534	0.0434423	1.12804	1.00355-1.26797	0.735224	0.94984	0.70705-1.27600	0.179019	1.16774	0.93685-1.45552	0.00358	0.83939	0.188	33.84238	27	0.17068	33.78792	26	0.14045
GCST90200983	22	0.602755	1.05593	0.86305-1.2919	0.0365166	1.13015	1.00770-1.26747	0.043507	1.14202	1.00388-1.29916	0.649874	1.05199	0.84788-1.30523	0.0308718	1.12172	1.01773-1.23633	0.01888	0.33368	0.003	52.03876	21	0.00019	49.60454	20	0.00025
GCST90200441	22	0.199586	1.24740	0.89984-1.7292	0.295217	1.10269	0.91825-1.32419	0.0438114	1.15149	1.00392-1.32076	0.65145	1.06789	0.80634-1.41428	0.622335	1.07241	0.81532-1.41055	-0.00929	0.60263	0.933	12.81933	21	0.91482	12.53949	20	0.89626
GCST90200849	25	0.638859	1.04018	0.88431-1.2235	0.232164	1.10221	0.93958-1.29299	0.0438539	1.10697	1.00280-1.22195	0.812162	1.03024	0.80796-1.31367	0.225769	1.09268	0.95019-1.25655	0.01183	0.35341	0.868	16.77180	24	0.85823	15.87470	23	0.86058
GCST90200848	18	0.949541	1.01139	0.71608-1.4285	0.191688	1.15177	0.93163-1.42394	0.0458336	1.17529	1.00299-1.37718	0.644038	1.09716	0.74557-1.61455	0.525599	1.11171	0.80704-1.53139	0.02039	0.35151	0.91	10.18332	17	0.89575	9.26237	16	0.90222
GCST90200933	24	0.0339356	1.39215	1.04513-1.8544	0.140189	1.15777	0.95298-1.40657	0.0465323	1.13781	1.00198-1.29205	0.542896	1.12869	0.76865-1.65739	0.514073	1.14951	0.76130-1.73567	-0.02669	0.13814	0.437	21.56140	23	0.54684	19.19380	22	0.63333
GCST90200645	34	0.0536801	1.05593	1.00118-1.1137	0.0482322	1.05971	1.00045-1.12249	0.0469836	1.04477	1.00058-1.09090	0.780234	1.02138	0.88142-1.18356	0.037551	1.05823	1.00542-1.11381	-0.00695	0.50117	0.312	37.63477	33	0.26531	37.09813	32	0.24552
GCST90200458	25	0.229141	1.11431	0.93849-1.3231	0.179158	1.10465	0.95534-1.27729	0.0471935	1.10444	1.00123-1.21830	0.978315	0.99644	0.77256-1.28520	0.277245	1.11786	0.91851-1.36049	-0.00168	0.90214	0.489	23.50047	24	0.49044	23.48469	23	0.43278
GCST90200249	27	0.0108206	1.10609	1.02949-1.1884	0.0462218	1.08249	1.00133-1.17023	0.0473257	1.06601	1.00075-1.13552	0.691864	1.06099	0.79427-1.41726	0.0214414	1.08916	1.01716-1.16626	-0.02128	0.07417	0.237	36.72560	26	0.07911	32.24622	25	0.15101
GCST90200079	28	0.055443	1.17834	1.00371-1.3833	0.0172512	1.12795	1.02153-1.24546	0.0484473	1.09650	1.00063-1.20156	0.0945669	1.23296	0.97290-1.56253	0.0314636	1.12503	1.01618-1.24554	-0.01471	0.29465	0.051	42.20284	27	0.03143	40.42429	26	0.03543
GCST90199718	17	0.15421	0.95943	0.90891-1.0128	0.152504	0.95880	0.90511-1.01568	0.0488148	0.95227	0.90706-0.99975	0.431469	0.90761	0.71722-1.14854	0.195302	0.96270	0.91106-1.01726	-0.00651	0.54407	0.595	13.58958	16	0.62926	13.20423	15	0.58653
GCST90200053	18	0.385161	1.14628	0.84945-1.5468	0.0166674	1.21991	1.03669-1.43552	0.0513033	1.15633	0.99918-1.33819	0.221734	1.18046	0.91352-1.52539	0.0553527	1.20859	1.00898-1.44768	0.00136	0.94818	0.121	26.49850	17	0.06584	26.49128	16	0.04750
GCST90200995	23	0.396704	1.20300	0.79147-1.8285	0.202538	1.14601	0.92930-1.41326	0.0519525	1.17510	0.99863-1.38274	0.153465	1.32986	0.91133-1.94061	0.380715	1.16370	0.83479-1.62220	-0.00301	0.90581	0.141	30.18855	22	0.11395	30.16795	21	0.08866
GCST90200989	25	0.359601	0.93793	0.82002-1.0728	0.0860334	0.90383	0.80528-1.01443	0.0535095	0.91783	0.84132-1.00130	0.55007	1.09122	0.82288-1.44706	0.176137	0.91963	0.81742-1.03462	-0.00435	0.67809	0.47	25.08961	24	0.40090	24.89828	23	0.35555
GCST90200175	23	0.448923	0.91065	0.71796-1.1550	0.512754	0.94444	0.79587-1.12075	0.0560476	0.89618	0.80086-1.00283	0.526187	0.90848	0.67837-1.21665	0.683697	0.95789	0.78094-1.17494	-0.00232	0.88227	0.559	20.29155	22	0.56481	20.26908	21	0.50428
GCST90200896	25	0.10582	1.22813	0.96680-1.5601	0.109707	1.12521	0.97376-1.30022	0.0561925	1.11179	0.99720-1.23954	0.0952	1.27553	0.96925-1.67861	0.129533	1.26486	0.94328-1.69608	-0.01807	0.36909	0.205	30.33460	24	0.17391	29.26658	23	0.17163
GCST90200376	24	0.355784	0.94900	0.85121-1.0580	0.248898	0.94383	0.85550-1.04129	0.0567636	0.92930	0.86177-1.00211	0.96681	1.00388	0.83809-1.20247	0.209717	0.94690	0.87159-1.02871	-0.00737	0.59933	0.248	29.62995	23	0.16032	29.25212	22	0.13780
GCST90199682	29	0.366581	0.91472	0.75626-1.1064	0.499185	0.95005	0.81885-1.10228	0.0571487	0.90901	0.82391-1.00290	0.12401	0.81559	0.63395-1.04927	0.244798	0.91208	0.78360-1.06162	-0.00096	0.94050	0.951	17.04748	28	0.94765	17.04180	27	0.93009
GCST90200130	21	0.907624	1.02428	0.68669-1.5278	0.389548	1.10268	0.88258-1.37767	0.0577772	1.18660	0.99437-1.41599	0.877964	1.03265	0.68884-1.54807	0.83639	0.96274	0.67456-1.37403	0.01960	0.43046	0.038	32.53659	20	0.03791	31.46200	19	0.03590
GCST90199703	28	0.044158	0.90465	0.82443-0.9927	0.066586	0.90998	0.82273-1.00648	0.0604571	0.93091	0.86386-1.00315	0.760334	1.04246	0.80017-1.35812	0.0569255	0.90986	0.82899-0.99863	0.01058	0.31869	0.465	28.51318	27	0.38489	27.42304	26	0.38742
GCST90200171	22	0.168165	1.27888	0.91285-1.7917	0.52059	1.06940	0.87143-1.31235	0.060709	1.15438	0.99356-1.34122	0.988126	0.99699	0.67341-1.47604	0.931726	0.98305	0.66800-1.44670	-0.01278	0.51233	0.279	24.58867	21	0.26542	24.05346	20	0.24006
GCST90200206	24	0.122164	1.33217	0.93908-1.8898	0.343521	1.08602	0.91555-1.28824	0.0611336	1.13052	0.99429-1.28542	0.479828	1.11846	0.82404-1.51806	0.731385	1.05226	0.78948-1.40250	-0.01939	0.33335	0.976	11.47915	23	0.97775	10.50075	22	0.98117
GCST90199968	24	0.824022	0.97274	0.76467-1.2374	0.488656	1.05920	0.90006-1.24648	0.0632751	1.10681	0.99440-1.23194	0.333461	1.14836	0.87274-1.51103	0.483701	1.06717	0.89227-1.27636	0.01840	0.25295	0.492	23.03201	23	0.45890	21.65376	22	0.48071
GCST90199818	27	0.297711	1.11043	0.91549-1.3469	0.660426	1.03771	0.87974-1.22404	0.0638287	1.11324	0.99385-1.24699	0.580276	1.08020	0.82459-1.41506	0.578185	1.05206	0.88170-1.25534	0.00042	0.97489	0.841	18.58271	26	0.85356	18.58170	25	0.81672
GCST90200866	30	0.130432	0.90789	0.80398-1.0252	0.10027	0.90650	0.80636-1.01908	0.0639611	0.92350	0.84893-1.00463	0.310778	0.89788	0.73171-1.10179	0.0810949	0.91073	0.82290-1.00793	0.00381	0.70594	0.93	18.94459	29	0.92270	18.79929	28	0.90421
GCST90200654	14	0.545851	1.09181	0.82768-1.4402	0.211712	1.10757	0.94348-1.30020	0.0643683	1.11761	0.99339-1.25738	0.191142	1.22360	0.91851-1.63003	0.20218	1.21011	0.91616-1.59837	0.00390	0.85809	0.59	11.55162	13	0.56471	11.51824	12	0.48510
GCST90200711	25	0.931252	1.00915	0.82228-1.2385	0.635737	1.03335	0.90218-1.18360	0.0653864	1.10456	0.99368-1.22781	0.0479678	1.45315	1.02250-2.06518	0.573159	1.04296	0.90279-1.20489	0.01661	0.32318	0.217	29.00382	24	0.21999	27.77293	23	0.22449
GCST90200232	18	0.30905	0.95539	0.87740-1.0403	0.16391	0.93798	0.85711-1.02647	0.0654902	0.93758	0.87543-1.00414	0.603289	1.05595	0.86325-1.29166	0.121824	0.93233	0.85692-1.01437	-0.00964	0.47539	0.966	8.33005	17	0.95897	7.79578	16	0.95471
GCST90200478	23	0.828811	1.04262	0.71756-1.5149	0.458766	1.07406	0.88908-1.29752	0.0655973	1.13570	0.99182-1.30046	0.0643284	1.45011	0.99765-2.10776	0.81566	0.96569	0.72255-1.29063	0.01148	0.63433	0.297	25.13649	22	0.29059	24.86070	21	0.25325
GCST90200275	27	0.392619	1.07094	0.91771-1.2497	0.184145	1.06536	0.97033-1.16970	0.0656154	1.10039	0.99384-1.21837	0.640874	1.05425	0.84657-1.31288	0.213964	1.06118	0.96852-1.16271	0.00595	0.64679	0.02	47.53180	26	0.00612	47.12627	25	0.00474
GCST90199644	26	0.930722	0.98358	0.67990-1.4229	0.0312998	0.81828	0.68174-0.98216	0.0678245	0.88614	0.77831-1.00890	0.306155	0.82946	0.58404-1.17800	0.16786	0.80174	0.59102-1.08758	-0.01111	0.55898	0.407	26.88813	25	0.36150	26.50034	24	0.32828
GCST90200646	34	0.08368	1.18434	0.98359-1.4261	0.347346	1.06839	0.93070-1.22646	0.0679814	1.09269	0.99347-1.20183	0.540543	1.09064	0.82843-1.43586	0.958522	1.00657	0.78790-1.28593	-0.01312	0.32968	0.608	30.48234	33	0.59307	29.50258	32	0.59355
GCST90200129	32	0.0426055	1.36994	1.02371-1.8333	0.0678127	1.18612	0.98758-1.42457	0.0683955	1.14745	0.98967-1.33038	0.974304	1.00579	0.70989-1.42503	0.255162	1.17082	0.89681-1.52853	-0.02153	0.17861	0.027	47.65975	31	0.02836	44.82543	30	0.04007
GCST90200071	24	0.787807	1.04121	0.77873-1.3922	0.145449	1.15062	0.95257-1.38986	0.0685069	1.14900	0.98951-1.33420	0.250453	1.26428	0.85612-1.86705	0.315901	1.18064	0.85951-1.62176	0.01617	0.44506	0.031	37.50914	23	0.02874	36.50567	22	0.02678
GCST90200251	17	0.426056	1.05255	0.93102-1.1900	0.143498	1.09674	0.96911-1.24117	0.0695927	1.08969	0.99314-1.19563	0.0897775	1.25881	0.98055-1.61602	0.11126	1.10289	0.98419-1.23592	0.01121	0.40531	0.27	20.68764	16	0.19083	19.72350	15	0.18280
GCST90200261	22	0.604246	1.08770	0.79548-1.4873	0.153705	1.14777	0.94977-1.38705	0.0717947	1.13175	0.98909-1.29499	0.178135	1.30077	0.89854-1.88304	0.146486	1.31929	0.92027-1.89133	0.00485	0.78570	0.64	17.99548	21	0.64929	17.91953	20	0.59271
GCST90199688	23	0.965845	1.00374	0.84797-1.1881	0.874997	0.99026	0.87655-1.11872	0.0730467	1.09121	0.99188-1.20048	0.800255	1.03938	0.77338-1.39687	0.835875	0.98730	0.87605-1.11266	0.01562	0.25200	0.401	19.48282	22	0.61536	18.09528	21	0.64297
GCST90199892	19	0.170714	1.20026	0.93466-1.5413	0.0498582	1.20272	1.00011-1.44638	0.0739334	1.12738	0.98846-1.28582	0.277546	1.19206	0.87649-1.62125	0.0893401	1.25222	0.97964-1.60064	-0.00882	0.56894	0.478	17.93062	18	0.46023	17.58164	17	0.41568
GCST90200369	27	0.63248	1.06430	0.82700-1.3697	0.54611	1.05110	0.89406-1.23572	0.0748707	1.10850	0.98972-1.24153	0.708987	1.05448	0.80052-1.38900	0.793072	1.03096	0.82284-1.29172	0.00662	0.72526	0.201	31.61904	26	0.20602	31.46008	25	0.17423
GCST90200513	15	0.229119	0.81265	0.58882-1.1216	0.242981	0.87651	0.70252-1.09358	0.0752081	0.87232	0.75045-1.01398	0.444307	0.87100	0.61755-1.22848	0.251869	0.83826	0.62766-1.11952	0.00927	0.63134	0.462	14.28825	14	0.42846	14.02770	13	0.37190
GCST90200341	22	0.300495	1.26864	0.81805-1.9674	0.233281	1.11779	0.93076-1.34239	0.0752567	1.15213	0.98569-1.34669	0.204411	1.26408	0.89018-1.79503	0.428898	1.10274	0.86951-1.39854	-0.01265	0.64928	0.037	35.57669	21	0.02438	35.20150	20	0.01906
GCST90200283	23	0.0381696	1.35139	1.03493-1.7646	0.258868	1.11670	0.92198-1.35256	0.0768022	1.13367	0.98659-1.30267	0.859628	1.03321	0.72239-1.47776	0.602506	1.08332	0.80507-1.45775	-0.02402	0.14928	0.244	25.89364	22	0.25628	23.39689	21	0.32319
GCST90200244	24	0.888438	0.98261	0.77118-1.2520	0.934739	1.00621	0.86769-1.16683	0.0785153	0.90983	0.81892-1.01083	0.613377	1.09215	0.77947-1.53026	0.547383	1.09912	0.81154-1.48861	-0.01154	0.49557	0.359	24.79001	23	0.36120	24.26044	22	0.33373
GCST90199636	25	0.535134	1.11256	0.79822-1.5507	0.205221	0.90074	0.76623-1.05887	0.0785417	0.90597	0.81159-1.01133	0.965989	1.00617	0.76063-1.33098	0.906735	0.98570	0.77656-1.25116	-0.02586	0.21155	0.498	23.95094	24	0.46441	22.29945	23	0.50224
GCST90200063	18	0.0556598	1.22222	1.01013-1.4788	0.0529453	1.11462	0.99862-1.24410	0.0788574	1.10590	0.98846-1.23730	0.658189	1.05285	0.84143-1.31739	0.0677593	1.11195	0.99950-1.23704	-0.01978	0.22521	0.076	29.05590	17	0.03401	26.42735	16	0.04830
GCST90199717	28	0.683345	0.96371	0.80847-1.1488	0.341134	0.93939	0.82590-1.06846	0.0789379	0.91672	0.83197-1.01010	0.916669	1.01347	0.79057-1.29922	0.373344	0.94788	0.84414-1.06436	-0.01025	0.50742	0.298	31.75174	27	0.24140	31.20943	26	0.22056
GCST90200500	28	0.560889	0.95056	0.80300-1.1252	0.831106	0.98656	0.87118-1.11721	0.0801655	0.92430	0.84629-1.00950	0.782012	0.97075	0.78831-1.19542	0.870338	0.98717	0.84664-1.15103	-0.00527	0.70399	0.451	28.17969	27	0.40175	28.02065	26	0.35744
GCST90200264	24	0.818709	1.01138	0.91919-1.1128	0.343841	1.04250	0.95642-1.13634	0.0820276	1.06788	0.99169-1.14992	0.618677	1.05504	0.85680-1.29913	0.296246	1.04164	0.96655-1.12257	0.02136	0.10839	0.197	31.72328	23	0.10604	28.14101	22	0.17105
GCST90200852	17	0.0909817	1.30884	0.97735-1.7528	0.13856	1.15823	0.95362-1.40673	0.0824613	1.13566	0.98377-1.31101	0.276106	1.20617	0.87078-1.67074	0.262821	1.18096	0.89176-1.56394	-0.02206	0.29129	0.91	9.37911	16	0.89698	8.18270	15	0.91625
GCST90200306	20	0.0843539	1.43764	0.97389-2.1222	0.258	1.12936	0.91471-1.39437	0.082598	1.13519	0.98376-1.30993	0.434394	1.17582	0.79014-1.74977	0.354616	1.19605	0.82631-1.73122	-0.02771	0.21741	0.524	17.55783	19	0.55213	15.92397	18	0.59785
GCST90200168	21	0.89288	0.96682	0.59549-1.5697	0.191367	1.18603	0.91821-1.53196	0.0885758	1.17330	0.97617-1.41024	0.167907	1.47808	0.86546-2.52434	0.180903	1.45540	0.85617-2.47403	0.01967	0.40743	0.331	22.04198	20	0.33824	21.23964	19	0.32371
GCST90200728	25	0.611577	1.07761	0.81074-1.4323	0.936868	0.99377	0.85143-1.15992	0.088974	1.11530	0.98351-1.26475	0.546227	0.89434	0.62547-1.27879	0.502255	0.90610	0.68228-1.20334	0.00592	0.79316	0.012	43.19860	24	0.00944	43.06683	23	0.00680
GCST90200402	32	0.234047	1.08756	0.94977-1.2453	0.592753	1.03731	0.90700-1.18635	0.0889867	1.07271	0.98936-1.16308	0.373696	1.11136	0.88365-1.39774	0.704729	1.02272	0.91150-1.14750	-0.00327	0.80576	0.598	28.84619	31	0.57724	28.78465	30	0.52893
GCST90200936	16	0.936194	0.98806	0.74024-1.3189	0.158596	0.85927	0.69591-1.06098	0.0906201	0.88226	0.76310-1.02003	0.825943	0.95544	0.64092-1.42429	0.142337	0.80568	0.61290-1.05910	-0.01687	0.38788	0.39	15.73782	15	0.39969	14.89293	14	0.38551
GCST90199763	30	0.17187	1.13753	0.95002-1.3621	0.0162478	1.16195	1.02807-1.31326	0.0911598	1.09166	0.98605-1.20858	0.960303	0.99293	0.75263-1.30994	0.0181775	1.18167	1.03690-1.34665	-0.00800	0.58941	0.02	44.77498	29	0.03094	44.30334	28	0.02592
GCST90200561	19	0.782012	1.05179	0.73965-1.4957	0.296086	1.10419	0.91685-1.32980	0.091398	1.16154	0.97617-1.38211	0.622257	1.07626	0.80746-1.43455	0.539313	1.07626	0.85497-1.35483	0.01664	0.53140	0.034	30.83739	18	0.03006	30.11429	17	0.02553
GCST90200793	27	0.203068	1.19532	0.91474-1.5620	0.309394	1.07789	0.93274-1.24563	0.092996	1.09681	0.98470-1.22168	0.386102	1.11238	0.87784-1.40957	0.575802	1.05499	0.87668-1.26956	-0.01360	0.49662	0.215	31.26004	26	0.21873	30.67605	25	0.19997
GCST90200067	28	0.564214	0.93175	0.73497-1.1812	0.527026	1.04598	0.90997-1.20232	0.0931998	1.10255	0.98378-1.23565	0.579078	1.07156	0.84186-1.36395	0.53854	1.05019	0.90023-1.22513	0.02427	0.12772	0.098	37.20900	27	0.09123	33.97411	26	0.13568
GCST90199987	26	0.909494	0.98552	0.76841-1.2640	0.944972	0.99459	0.85268-1.16012	0.095016	0.91269	0.81986-1.01602	0.857543	0.97276	0.72174-1.31109	0.900598	1.01559	0.79867-1.29142	-0.01339	0.50807	0.394	25.81369	25	0.41759	25.33709	24	0.38763
GCST90199850	29	0.0882458	0.90853	0.81691-1.0104	0.114751	0.93069	0.85121-1.01759	0.0953964	0.94404	0.88226-1.01015	0.331338	0.92809	0.80044-1.07609	0.181263	0.94538	0.87244-1.02442	0.01009	0.36648	0.304	32.50976	28	0.25427	31.52469	27	0.25015
GCST90200377	22	0.573165	1.04148	0.90627-1.1969	0.249267	1.09193	0.94020-1.26815	0.0956087	1.08426	0.98586-1.19249	0.799114	0.96494	0.73556-1.26584	0.220528	1.10509	0.94631-1.29051	0.00761	0.44567	0.572	19.78657	21	0.53481	19.18126	20	0.51007
GCST90200196	20	0.438473	1.10464	0.86359-1.4130	0.327697	0.92149	0.78231-1.08543	0.0968175	0.90675	0.80780-1.01781	0.748428	0.96216	0.76268-1.21381	0.514499	0.93529	0.76777-1.13938	-0.02968	0.09196	0.675	16.72559	19	0.60845	13.55718	18	0.75747
GCST90200211	23	0.911295	0.98040	0.69496-1.3831	0.323215	0.92057	0.78116-1.08486	0.0972176	0.90406	0.80248-1.01850	0.927052	0.98518	0.71819-1.35142	0.428073	0.89843	0.69274-1.16520	-0.01117	0.62685	0.285	24.69351	22	0.31195	24.41053	21	0.27360
GCST90200944	16	0.964107	1.00718	0.74174-1.3676	0.25353	1.12055	0.92168-1.36233	0.100336	1.12730	0.97717-1.30050	0.742843	1.05914	0.75617-1.48350	0.477211	1.10915	0.83953-1.46536	0.01579	0.42789	0.813	9.90166	15	0.82588	9.23497	14	0.81571
GCST90199921	13	0.818957	0.96590	0.72273-1.2909	0.517818	1.08338	0.84990-1.38101	0.102191	1.15656	0.97143-1.37698	0.482575	1.13819	0.80198-1.61533	0.701234	1.05562	0.80586-1.38278	0.03368	0.15722	0.428	12.16470	12	0.43254	9.86044	11	0.54298
GCST90200138	16	0.0377739	0.67012	0.47601-0.9434	0.14604	0.88741	0.75539-1.04249	0.102515	0.89588	0.78512-1.02228	0.453203	0.89405	0.67231-1.18892	0.286167	0.88686	0.71688-1.09715	0.04801	0.09611	0.147	21.27821	15	0.12817	17.33708	14	0.23866
GCST90200546	16	0.49073	0.88518	0.63144-1.2409	0.12855	0.87086	0.72862-1.04086	0.104382	0.89644	0.78563-1.02288	0.20464	0.82783	0.62612-1.09452	0.272813	0.84394	0.63015-1.13027	0.00188	0.93761	0.71	12.04437	15	0.67567	12.03802	14	0.60325
GCST90200830	22	0.875243	0.97885	0.75216-1.2739	0.168276	0.89831	0.77121-1.04636	0.10678	0.91137	0.81416-1.02018	0.180702	0.83272	0.64263-1.07904	0.262942	0.87791	0.70323-1.09598	-0.01100	0.56305	0.64	18.24880	21	0.63321	17.90294	20	0.59380
GCST90200988	16	0.142143	1.25118	0.94339-1.6594	0.287657	1.08748	0.93172-1.26927	0.107451	1.11121	0.97732-1.26343	0.982149	1.00315	0.76479-1.31580	0.294826	1.08893	0.93367-1.27000	-0.02177	0.37023	0.174	22.18535	15	0.10304	20.90544	14	0.10408
GCST90199886	21	0.184846	1.09761	0.96124-1.2533	0.954126	1.00369	0.88545-1.13771	0.107965	1.06737	0.98580-1.15568	0.347429	1.13185	0.87948-1.45663	0.90974	1.00763	0.88502-1.14722	-0.00632	0.61208	0.619	14.70325	20	0.79313	14.43740	19	0.75762
GCST90200026	32	0.00799235	1.14420	1.04268-1.2556	0.0896706	1.07737	0.98852-1.17420	0.108279	1.05728	0.98780-1.13166	0.475577	0.92402	0.74566-1.14504	0.0373061	1.07901	1.00757-1.15551	-0.02812	0.02916	0.029	48.76533	31	0.02219	41.50350	30	0.07887
GCST90200963	20	0.126982	0.78298	0.58023-1.0566	0.0798342	0.86868	0.74207-1.01689	0.108583	0.90064	0.79257-1.02345	0.288431	0.85501	0.64549-1.13255	0.170427	0.83559	0.65267-1.06979	0.02261	0.32484	0.07	29.32428	19	0.06105	27.74497	18	0.06604
GCST90199737	21	0.595116	1.08741	0.80246-1.4735	0.160379	1.13399	0.95140-1.35162	0.110154	1.12268	0.97408-1.29393	0.444149	1.13455	0.82638-1.55763	0.523547	1.10498	0.81748-1.49361	0.00465	0.81713	0.142	26.48151	20	0.15049	26.40511	19	0.11929
GCST90199989	14	0.62891	1.08926	0.77692-1.5272	0.771409	0.96807	0.77774-1.20498	0.110379	0.88494	0.76163-1.02822	0.307665	0.83561	0.59983-1.16407	0.976419	1.00432	0.75866-1.32953	-0.02727	0.20357	0.459	12.94912	13	0.45175	11.14071	12	0.51690
GCST90199702	19	0.494538	0.90941	0.69658-1.1873	0.413774	0.91661	0.74386-1.12947	0.111712	0.89760	0.78573-1.02541	0.0483801	0.68691	0.48523-0.97242	0.513613	0.92145	0.72438-1.17212	-0.00213	0.91219	0.353	20.48178	18	0.30636	20.46669	17	0.25106
GCST90199945	28	0.0368138	0.92918	0.87035-0.9920	0.0342536	0.93110	0.87155-0.99472	0.112405	0.95442	0.90099-1.01101	0.364756	1.12646	0.87451-1.45101	0.0603606	0.93618	0.87643-0.99999	0.01695	0.13006	0.199	41.83890	27	0.03414	38.24384	26	0.05748
GCST90199645	20	0.0319643	1.19915	1.02892-1.3975	0.307303	1.07637	0.93455-1.23970	0.114027	1.09692	0.97802-1.23028	0.314897	1.13613	0.89164-1.44767	0.0538777	1.12971	1.00566-1.26907	-0.02850	0.11851	0.154	27.20867	19	0.09989	23.67419	18	0.16599
GCST90199709	24	0.0417514	1.08435	1.00760-1.1669	0.0480602	1.08148	1.00067-1.16882	0.11574	1.05198	0.98761-1.12054	0.508366	1.07935	0.86381-1.34866	0.0228857	1.07935	1.01510-1.14767	-0.01618	0.15177	0.196	35.42077	23	0.04722	32.19425	22	0.07414
GCST90199998	25	0.269027	1.26746	0.84104-1.9101	0.529188	1.06585	0.87383-1.30005	0.115829	1.12836	0.97068-1.31166	0.839876	0.95826	0.63652-1.44263	0.719316	0.93590	0.65488-1.33752	-0.01411	0.55537	0.123	31.63008	24	0.13643	31.14505	23	0.11927
GCST90200505	21	0.253692	0.88702	0.72649-1.0830	0.285195	0.92441	0.80031-1.06775	0.116121	0.91762	0.82430-1.02150	0.445231	0.91651	0.73595-1.14138	0.518698	0.94236	0.78938-1.12498	0.00645	0.69480	0.301	23.23297	20	0.27750	23.04053	19	0.23556
GCST90200730	32	0.841084	0.98461	0.84720-1.1443	0.531109	0.95926	0.84218-1.09261	0.117094	0.93437	0.85831-1.01717	0.496482	0.92733	0.74801-1.14963	0.4898	0.95413	0.83642-1.08841	-0.01141	0.41334	0.219	37.99949	31	0.18063	37.14736	30	0.17289
GCST90200350	19	0.665877	0.92140	0.63956-1.3274	0.478463	0.92298	0.73949-1.15199	0.118308	0.87763	0.74503-1.03383	0.761124	0.93611	0.61551-1.42369	0.823472	1.04150	0.73243-1.48098	-0.00570	0.77205	0.415	18.78107	18	0.40542	18.68584	17	0.34686
GCST90200179	25	0.233365	1.05704	0.96719-1.1552	0.0843842	1.07610	0.99010-1.16958	0.118325	1.05267	0.98700-1.12271	0.96852	1.00366	0.83859-1.20123	0.192683	1.05878	0.97394-1.15101	-0.00150	0.89554	0.769	19.01656	24	0.75111	18.99894	23	0.70129
GCST90199800	26	0.560792	0.91071	0.66743-1.2427	0.323282	1.08205	0.92531-1.26535	0.119374	1.10034	0.97559-1.24105	0.611155	1.07944	0.80691-1.44400	0.781099	1.03857	0.79755-1.35241	0.02224	0.20804	0.892	16.90423	25	0.88524	15.23025	24	0.91384
GCST90200003	22	0.108604	1.33470	0.95293-1.8694	0.665352	1.04400	0.85895-1.26891	0.119833	1.12959	0.96881-1.31706	0.694469	0.92999	0.65063-1.32929	0.798374	0.96675	0.74824-1.24906	-0.02296	0.28901	0.169	27.82471	21	0.14519	26.26660	20	0.15719
GCST90200269	24	0.726102	1.01602	0.93063-1.1092	0.248302	1.05197	0.96527-1.14647	0.119946	1.05547	0.98604-1.12980	0.906022	0.98674	0.79251-1.22857	0.261759	1.04166	0.97169-1.11667	0.01455	0.20167	0.354	26.94487	23	0.25832	24.97812	22	0.29812
GCST90200631	25	0.016303	1.25132	1.05618-1.4825	0.0616276	1.16069	0.99277-1.35703	0.121728	1.09781	0.97544-1.23554	0.531583	1.10734	0.80826-1.51710	0.0371408	1.16419	1.01715-1.33249	-0.02752	0.05666	0.046	38.48407	24	0.03091	32.74964	23	0.08553
GCST90199769	22	0.938535	1.01154	0.75845-1.3491	0.71124	0.96724	0.81083-1.15381	0.122019	0.89886	0.78524-1.02893	0.838969	1.03369	0.75390-1.41731	0.990804	0.99843	0.76649-1.30055	-0.01889	0.37294	0.116	28.29704	21	0.13193	27.16866	20	0.13059
GCST90199667	23	0.21645	1.03863	0.97982-1.1010	0.238762	1.03917	0.97482-1.10776	0.122227	1.04023	0.98948-1.09358	0.718155	1.03366	0.86554-1.23444	0.186561	1.03884	0.98346-1.09734	0.00096	0.92005	0.609	21.11296	22	0.51377	21.10259	21	0.45269
GCST90200857	29	0.446628	1.15384	0.80248-1.6590	0.393399	1.08974	0.89457-1.32749	0.12313	1.12000	0.96973-1.29355	0.618284	1.09997	0.75930-1.59350	0.619043	1.08086	0.79823-1.46357	-0.00324	0.86190	0.175	34.83145	28	0.17483	34.79170	27	0.14422
GCST90200226	18	0.554282	0.90348	0.64996-1.2559	0.06208	0.83412	0.68941-1.00921	0.123298	0.89920	0.78555-1.02930	0.115328	0.73582	0.51218-1.05710	0.11596	0.74633	0.52794-1.05507	-0.00069	0.97566	0.487	16.08292	17	0.51796	16.08195	16	0.44726
GCST90201016	28	0.658004	1.03441	0.89203-1.1995	0.129088	1.08619	0.97620-1.20857	0.123887	1.07016	0.98160-1.16670	0.18996	1.14741	0.93900-1.40208	0.201336	1.06984	0.96704-1.18356	0.00807	0.58207	0.11	37.55032	27	0.08525	37.10701	26	0.07311
GCST90200796	23	0.269464	0.85018	0.64225-1.1254	0.48051	0.93968	0.79051-1.11699	0.12397	0.90305	0.79302-1.02835	0.748162	0.94628	0.67836-1.32003	0.785479	0.95718	0.70112-1.30676	0.00808	0.63750	0.149	28.44013	22	0.16155	28.13386	21	0.13640
GCST90200015	17	0.28303	1.07312	0.94776-1.2151	0.31235	1.05172	0.95371-1.15980	0.125409	1.06309	0.98308-1.14961	0.874505	0.98253	0.79225-1.21851	0.393148	1.04366	0.94866-1.14816	-0.00277	0.85125	0.929	9.86164	16	0.87375	9.82525	15	0.83059
GCST90200623	24	0.153346	1.20510	0.94111-1.5431	0.293264	1.09092	0.92750-1.28314	0.12562	1.09698	0.97444-1.23493	0.751969	1.04808	0.78598-1.39759	0.805958	1.03531	0.78739-1.36129	-0.01387	0.40508	0.997	8.61669	23	0.99709	7.89607	22	0.99742
GCST90200054	19	0.134582	1.16112	0.96370-1.3990	0.0190271	1.11601	1.01818-1.22324	0.125695	1.08402	0.97767-1.20195	0.0976577	1.22673	0.97541-1.54280	0.0195844	1.11731	1.02642-1.21625	-0.01826	0.39607	0.012	36.53734	18	0.00602	34.97765	17	0.00626
GCST90200237	28	0.0679663	0.71675	0.50876-1.0098	0.560992	0.94675	0.78726-1.13855	0.12584	0.88705	0.76086-1.03418	0.613204	0.90771	0.62629-1.31557	0.690633	0.92882	0.64818-1.33097	0.02516	0.18605	0.013	45.77390	27	0.01345	42.74111	26	0.02056
GCST90200825	26	0.72438	1.05824	0.77539-1.4443	0.425236	1.08427	0.88872-1.32285	0.126586	1.11258	0.97026-1.27577	0.544466	0.87793	0.57956-1.32989	0.497483	0.87793	0.60603-1.27181	0.00684	0.72721	0.332	27.14103	25	0.34888	27.00088	24	0.30441
GCST90200417	22	0.248149	1.04468	0.97209-1.1227	0.169579	1.05440	0.97764-1.13720	0.127267	1.04841	0.98660-1.11408	0.221585	1.20110	0.90316-1.59734	0.116986	1.05729	0.98898-1.13031	0.00197	0.85238	0.649	20.68440	21	0.47836	20.64771	20	0.41812
GCST90199848	29	0.0446738	0.84122	0.71616-0.9881	0.0107898	0.85471	0.75753-0.96435	0.12745	0.93743	0.86268-1.01865	0.591162	1.07702	0.82412-1.40754	0.0123847	0.83934	0.73820-0.95434	0.01990	0.13676	0.351	28.64025	28	0.43094	26.28832	27	0.50265
GCST90200934	19	0.192236	0.84113	0.65527-1.0797	0.138671	0.86387	0.71175-1.04850	0.128892	0.89871	0.78299-1.03154	0.824482	0.96490	0.70686-1.31713	0.364723	0.89084	0.69821-1.13660	0.01110	0.54138	0.928	10.20933	18	0.92486	9.82086	17	0.91095
GCST90199976	24	0.918474	1.01733	0.73485-1.4084	0.0617048	1.17299	0.99221-1.38670	0.129091	1.10489	0.97135-1.25680	0.239467	1.20252	0.89146-1.62211	0.179802	1.21726	0.92134-1.60823	0.01096	0.59230	0.263	27.42970	23	0.23812	27.06637	22	0.20872
GCST90200978	27	0.700159	1.04571	0.83511-1.3094	0.113692	1.12756	0.97171-1.30841	0.132296	1.07969	0.97709-1.19305	0.504604	0.90809	0.68683-1.20064	0.223926	1.14841	0.92375-1.42771	0.00504	0.75841	0.689	21.81142	26	0.69897	21.71472	25	0.65216
GCST90200408	19	0.779543	1.03595	0.81211-1.3215	0.759477	0.96777	0.78468-1.19358	0.132326	0.90093	0.78647-1.03204	0.290121	0.82834	0.59037-1.16223	0.586829	0.94264	0.76469-1.16201	-0.02768	0.19314	0.474	17.61897	18	0.48101	15.78285	17	0.53928
GCST90200538	19	0.15554	0.79937	0.59496-1.0740	0.556397	0.94183	0.77133-1.15002	0.132765	0.90310	0.79071-1.03145	0.913749	0.97906	0.67116-1.42822	0.961666	0.99070	0.68047-1.44237	0.01864	0.37664	0.384	18.42211	18	0.42819	17.57026	17	0.41642
GCST90200114	25	0.2781	0.87295	0.68688-1.1094	0.716856	1.02903	0.88157-1.20115	0.132926	1.08489	0.97551-1.20654	0.593167	1.08032	0.81677-1.42892	0.939158	1.00730	0.83724-1.21191	0.03058	0.05949	0.656	20.71195	24	0.65565	16.78155	23	0.81983
GCST90200073	27	0.0131188	0.76167	0.62373-0.9301	0.12645	0.91295	0.81230-1.02606	0.134742	0.90760	0.79931-1.03056	0.121897	0.83441	0.66837-1.04171	0.0830143	0.90286	0.80793-1.00895	0.03818	0.04215	<0.001	66.52498	26	0.00002	56.21196	25	0.00034
GCST90200920	19	0.108987	0.83271	0.67355-1.0295	0.387422	0.92492	0.77490-1.10400	0.136699	0.90819	0.80002-1.03100	0.225991	0.82973	0.61973-1.11088	0.294504	0.91560	0.78017-1.07453	0.01522	0.33124	0.26	22.32105	18	0.21804	21.08054	17	0.22271
GCST90200667	18	0.0378319	1.64937	1.06948-2.5437	0.70991	1.04594	0.82549-1.32527	0.136919	1.14257	0.95853-1.36194	0.883013	1.03900	0.62890-1.71653	0.871643	1.03900	0.65774-1.64126	-0.04344	0.09131	0.238	20.33319	17	0.25754	16.91998	16	0.39079
GCST90200876	32	0.265449	1.05854	0.95947-1.1678	0.12476	1.10330	0.97316-1.25086	0.137206	1.05631	0.98269-1.13544	0.4496	1.10214	0.85927-1.41367	0.118534	1.09266	0.98062-1.21751	-0.00050	0.95086	0.748	24.21243	31	0.80178	24.20857	30	0.76251
GCST90199947	23	0.401627	1.27734	0.72931-2.2372	0.212159	1.16223	0.91774-1.47184	0.137538	1.20238	0.94275-1.53351	0.430867	1.23899	0.73409-2.09116	0.425503	1.21908	0.75573-1.96652	-0.00665	0.81573	<0.001	58.74889	22	0.00003	58.59350	21	0.00002
GCST90200612	19	0.452506	0.88814	0.65639-1.2017	0.0238505	0.81870	0.68829-0.97383	0.138749	0.89580	0.77437-1.03628	0.154898	0.79177	0.58177-1.07759	0.0796614	0.80007	0.63229-1.01237	0.00163	0.94965	0.113	26.45744	18	0.08975	26.45104	17	0.06663
GCST90200267	27	0.719382	0.95527	0.74633-1.2227	0.233358	0.90647	0.77129-1.06535	0.139135	0.91343	0.81014-1.02989	0.406381	0.89220	0.68458-1.16280	0.401044	0.90503	0.71973-1.13803	-0.00588	0.68747	0.886	18.22522	26	0.86743	18.05956	25	0.83985
GCST90200702	23	0.564065	1.04860	0.89472-1.2289	0.580431	1.02828	0.93146-1.13517	0.139299	1.07940	0.97542-1.19446	0.546026	0.92366	0.71661-1.19054	0.615259	1.02539	0.93117-1.12913	0.00619	0.64293	0.153	32.57521	22	0.06810	32.23557	21	0.05541
GCST90200939	24	0.194507	1.22219	0.91098-1.6397	0.753871	1.03167	0.84898-1.25367	0.140844	1.10563	0.96731-1.26373	0.529111	0.87535	0.58190-1.31678	0.547879	0.87166	0.56061-1.35530	-0.01610	0.45977	0.385	23.92391	23	0.40803	23.32369	22	0.38365
GCST90200214	28	0.526699	0.93257	0.75350-1.1542	0.167908	0.89294	0.76019-1.04887	0.141379	0.91662	0.81620-1.02939	0.620501	0.93325	0.71219-1.22292	0.338059	0.88286	0.68732-1.13403	-0.00294	0.85033	0.391	28.88769	27	0.36637	28.84738	26	0.31807
GCST90200670	21	0.234867	1.14911	0.92030-1.4348	0.150095	1.12458	0.95840-1.31956	0.141671	1.08922	0.97188-1.22073	0.146719	1.28729	0.92747-1.78671	0.122189	1.16010	0.96867-1.38936	-0.00846	0.58826	0.557	19.34030	20	0.49982	19.03644	19	0.45450
GCST90200163	16	0.758741	1.06214	0.72834-1.5489	0.257962	1.12259	0.91877-1.37164	0.141997	1.12228	0.96211-1.30912	0.50396	1.11718	0.81353-1.53415	0.602452	1.09094	0.79170-1.50329	0.00793	0.75858	0.987	5.50793	15	0.98688	5.40969	14	0.97925
GCST90200006	23	0.873392	1.01163	0.87900-1.1643	0.62172	1.03578	0.90078-1.19101	0.142485	0.92689	0.83745-1.02587	0.876188	0.98077	0.77040-1.24859	0.661915	1.03134	0.89980-1.18211	-0.02220	0.10524	0.151	27.51567	22	0.19229	24.21117	21	0.28294
GCST90199663	20	0.223146	0.87371	0.70841-1.0776	0.537147	0.94665	0.79536-1.12671	0.143022	0.91556	0.81360-1.03029	0.72344	0.95203	0.72800-1.24500	0.564688	0.94764	0.79166-1.13435	0.00738	0.60325	0.636	17.32529	19	0.56784	17.04542	18	0.51998
GCST90200550	30	0.46978	0.92017	0.73658-1.1495	0.175942	0.90059	0.77387-1.04805	0.144084	0.92845	0.84042-1.02570	0.959603	0.99279	0.75220-1.31034	0.484491	0.93964	0.79090-1.11634	0.00142	0.93030	0.622	26.49036	29	0.59918	26.48257	28	0.54654
GCST90199704	21	0.460189	1.09224	0.86834-1.3739	0.175726	1.12719	0.94783-1.34050	0.144585	1.09388	0.96965-1.23401	0.556098	1.08273	0.83466-1.40452	0.32008	1.13716	0.88821-1.45588	0.00024	0.98819	0.566	18.28843	20	0.56841	18.28821	19	0.50327
GCST90200548	30	0.841572	1.01636	0.86815-1.1899	0.372661	0.94044	0.82166-1.07638	0.14628	0.93195	0.84743-1.02491	0.867343	1.01843	0.82356-1.25941	0.708639	0.96991	0.82759-1.13670	-0.01585	0.18928	0.459	29.48468	29	0.44005	27.67452	28	0.48179
GCST90199699	26	0.516358	1.07227	0.87123-1.3197	0.280031	1.09513	0.92867-1.29144	0.146564	1.08855	0.97073-1.22066	0.509192	1.10770	0.82113-1.49429	0.511216	1.08821	0.84868-1.39535	0.00242	0.86601	0.868	17.69064	25	0.85524	17.66155	24	0.81911
GCST90199999	20	0.246628	0.81458	0.58231-1.1395	0.237718	0.89499	0.74445-1.07597	0.147096	0.90332	0.78731-1.03642	0.673219	0.93769	0.69855-1.25868	0.558191	0.91772	0.69196-1.21713	0.01331	0.51644	0.984	7.99944	19	0.98668	7.56138	18	0.98448
GCST90200076	21	0.485754	0.90716	0.69347-1.1867	0.154599	1.12985	0.95503-1.33668	0.147395	1.09441	0.96867-1.23648	0.55302	1.07996	0.84119-1.38649	0.360513	1.08923	0.91071-1.30275	0.03225	0.14379	0.26	23.99353	20	0.24267	21.37761	19	0.31632
GCST90200044	19	0.160038	1.25428	0.92711-1.6969	0.161654	1.15301	0.94458-1.40743	0.147409	1.12994	0.95780-1.33302	0.210586	1.29379	0.87696-1.90873	0.240675	1.17036	0.90773-1.50898	-0.01598	0.42805	0.079	28.06040	18	0.06114	27.01285	17	0.05788
GCST90200322	28	0.713038	0.95833	0.76575-1.1994	0.586503	1.04500	0.89173-1.22460	0.149202	1.07811	0.97337-1.19412	0.616468	0.92663	0.69007-1.24428	0.578093	0.90408	0.63640-1.28433	0.01781	0.25828	0.553	24.19021	27	0.61975	22.85436	26	0.64117
GCST90200799	23	0.318464	0.87154	0.66951-1.1345	0.192819	0.91788	0.80682-1.04423	0.150698	0.93227	0.84722-1.02585	0.528219	0.92680	0.73454-1.16937	0.424346	0.92481	0.76615-1.11633	0.01467	0.59679	0.959	12.42061	22	0.94807	12.13204	21	0.93598
GCST90199788	27	0.674847	0.97034	0.84439-1.1151	0.202764	0.94545	0.86727-1.03068	0.152058	0.93686	0.85686-1.02432	0.401637	0.91043	0.73379-1.12960	0.199323	0.94283	0.86373-1.02916	-0.00789	0.52108	0.068	40.70460	26	0.03322	40.02639	25	0.02898
GCST90199926	28	0.269951	0.93531	0.83264-1.0506	0.536835	0.96932	0.87807-1.07007	0.155218	0.94024	0.86365-1.02363	0.0665944	0.79378	0.62641-1.00586	0.271044	0.94846	0.86483-1.04017	0.00135	0.89549	0.182	35.68777	27	0.12229	35.66363	26	0.09803
GCST90199750	26	0.521559	0.92775	0.74010-1.1630	0.281918	0.91051	0.76757-1.08006	0.156504	0.91627	0.81188-1.03408	0.6971	0.93960	0.68906-1.28124	0.408721	0.89997	0.70382-1.15079	-0.00199	0.89933	0.581	22.63815	25	0.59868	22.62180	24	0.54221
GCST90199920	15	0.39267	1.21598	0.78824-1.8758	0.270684	1.13976	0.90306-1.43850	0.156568	1.13118	0.95383-1.34149	0.542899	1.13446	0.76311-1.68652	0.521468	1.12462	0.79246-1.59601	-0.00752	0.72789	0.558	12.84978	14	0.53839	12.72337	13	0.46940
GCST90200704	31	0.773586	1.01683	0.90849-1.1381	0.546766	1.02791	0.93987-1.12421	0.156899	1.05425	0.97989-1.13426	0.464344	0.91133	0.71291-1.16497	0.587002	1.02545	0.93745-1.12172	0.00881	0.41346	0.487	31.17586	30	0.40680	30.45288	29	0.39166
GCST90199732	31	0.258144	1.12758	0.91947-1.3828	0.612175	1.03712	0.90081-1.19406	0.157178	1.07624	0.97207-1.19156	0.695384	1.04905	0.82736-1.33013	0.77575	1.02887	0.84738-1.24922	-0.00743	0.60789	0.372	32.80330	30	0.33114	32.50174	29	0.29829
GCST90199858	22	0.186022	0.94687	0.87570-1.0238	0.127136	0.95352	0.89696-1.01365	0.15982	0.95676	0.89957-1.01758	0.327009	0.91223	0.76241-1.09149	0.197708	0.96095	0.90617-1.01904	0.00523	0.66549	0.271	28.05913	21	0.13848	27.79155	20	0.11443
GCST90200800	16	0.0330263	1.25059	1.03901-1.5053	0.412286	1.07871	0.90000-1.29290	0.159977	1.09217	0.96578-1.23510	0.961468	0.99197	0.71915-1.36830	0.264487	1.13123	0.91835-1.39346	-0.02881	0.07622	0.533	13.77931	15	0.54233	10.11410	14	0.75379
GCST90200891	23	0.0517839	1.24528	1.01092-1.5340	0.0814184	1.15744	0.98192-1.36435	0.161206	1.08490	0.96801-1.21591	0.722386	0.95143	0.72543-1.24783	0.103669	1.19724	0.97257-1.47381	-0.02168	0.13657	0.893	14.46701	22	0.88408	12.07077	21	0.93769
GCST90200407	19	0.159612	0.78621	0.57059-1.0833	0.0918489	0.85169	0.70667-1.02646	0.162957	0.89928	0.77469-1.04391	0.209078	0.80408	0.57918-1.11629	0.216821	0.81268	0.59153-1.11651	0.02163	0.36576	0.222	22.84137	18	0.19676	21.73723	17	0.19504
GCST90200033	24	0.00416955	1.54717	1.18388-2.0219	0.866071	0.98282	0.80349-1.20216	0.163926	1.11063	0.95809-1.28747	0.824836	0.95857	0.66183-1.38837	0.811181	0.95857	0.68013-1.35101	-0.04039	0.01074	0.174	29.03100	23	0.17928	21.26116	22	0.50465
GCST90199729	26	0.710864	0.94145	0.68690-1.2903	0.377776	1.08489	0.90521-1.30023	0.164335	1.11189	0.95750-1.29117	0.587597	1.09546	0.79130-1.51653	0.519066	1.09546	0.83356-1.43965	0.02072	0.25247	0.061	37.06119	25	0.05697	35.05303	24	0.06762
GCST90199824	25	0.916198	1.00985	0.84306-1.2096	0.345006	0.91982	0.77334-1.09405	0.164783	0.92417	0.82685-1.03294	0.473389	0.89905	0.67519-1.19712	0.255287	0.91160	0.78021-1.06513	-0.01524	0.23661	0.456	24.84512	24	0.41422	23.34612	23	0.44072
GCST90199777	34	0.521519	0.89810	0.64891-1.2430	0.648202	0.96432	0.82497-1.12720	0.164783	0.91414	0.80538-1.03758	0.698993	0.93801	0.68008-1.29377	0.890579	0.98142	0.75282-1.27943	0.00229	0.90821	0.05	48.57769	33	0.03937	48.55719	32	0.03055
GCST90199757	26	0.730545	1.04176	0.82762-1.3113	0.592808	1.04409	0.89137-1.22299	0.165161	1.08709	0.96617-1.22315	0.759517	0.95461	0.71130-1.28115	0.776415	1.03506	0.81809-1.30955	0.00677	0.67457	0.339	28.10719	25	0.30294	27.89716	24	0.26440
GCST90199810	23	0.62137	1.06763	0.82661-1.3789	0.194487	1.11603	0.94548-1.31733	0.165605	1.09330	0.96377-1.24023	0.224947	1.21227	0.89612-1.63997	0.282236	1.16908	0.88555-1.54338	0.00319	0.83633	0.963	12.41096	22	0.94830	12.36721	21	0.92917
GCST90200999	19	0.953082	1.01468	0.62889-1.6371	0.300221	1.12330	0.90149-1.39970	0.165979	1.12519	0.95224-1.32957	0.362973	1.17713	0.83580-1.65785	0.334325	1.17713	0.85290-1.62462	0.01373	0.65597	0.284	21.39057	18	0.26017	21.13496	17	0.22031
GCST90199680	20	0.809265	1.03831	0.76855-1.4028	0.625886	1.05183	0.85845-1.28877	0.166072	1.11324	0.95644-1.29575	0.682176	1.06998	0.77790-1.47174	0.691221	1.04550	0.84220-1.29786	0.00954	0.60303	0.177	26.02808	19	0.12941	25.62910	18	0.10855
GCST90199896	29	0.077475	0.77583	0.59163-1.0174	0.453535	0.94258	0.80753-1.10021	0.166659	0.92496	0.82816-1.03308	0.617328	1.09342	0.77327-1.54612	0.638339	1.08571	0.77341-1.52410	0.02238	0.17514	0.655	24.49757	28	0.65502	22.55855	27	0.70848
GCST90200104	17	0.828389	1.05057	0.67773-1.6285	0.240548	1.15792	0.90643-1.47918	0.167333	1.13342	0.94882-1.35394	0.433622	1.16651	0.80106-1.69868	0.37662	1.16651	0.83701-1.62573	0.01062	0.71559	0.6	14.14199	16	0.58814	14.00410	15	0.52522
GCST90200089	30	0.486147	0.93761	0.78402-1.1213	0.870505	0.99016	0.87913-1.11520	0.167369	1.06717	0.97309-1.17035	0.675136	0.96037	0.79642-1.15807	0.748931	0.98106	0.87360-1.10173	0.02227	0.11238	0.147	36.46318	29	0.16046	33.27071	28	0.22592
GCST90200132	24	0.260176	1.20583	0.87788-1.6563	0.201872	1.12365	0.93945-1.34398	0.168737	1.09485	0.96229-1.24568	0.293068	1.16891	0.87967-1.55326	0.320432	1.14112	0.88446-1.47225	-0.01209	0.52080	0.577	21.28323	23	0.56380	20.85741	22	0.52957
GCST90201001	17	0.133624	1.33336	0.93438-1.9027	0.735509	1.03607	0.84353-1.27255	0.169725	1.10531	0.95811-1.27513	0.692337	0.92699	0.64109-1.34039	0.884813	0.97336	0.67937-1.39456	-0.02234	0.27667	0.446	16.04044	16	0.45014	14.76601	15	0.46840
GCST90200108	19	0.100927	1.44712	0.95308-2.1973	0.912375	0.98806	0.79783-1.22367	0.171244	0.88804	0.74914-1.05270	0.457093	1.19223	0.75758-1.87626	0.612889	1.11239	0.74160-1.66858	-0.05061	0.02508	0.136	24.81620	18	0.13006	18.31520	17	0.36922
GCST90200009	22	0.492758	1.06678	0.88986-1.2789	0.842365	1.01665	0.86398-1.19628	0.171319	1.08013	0.96719-1.20626	0.587368	1.07306	0.83505-1.37892	0.803961	1.01900	0.87989-1.18011	0.00224	0.86522	0.455	21.92903	21	0.40361	21.89667	20	0.34614
GCST90201002	17	0.928177	1.01970	0.67192-1.5475	0.0124638	0.78475	0.64887-0.94908	0.171745	0.88447	0.74169-1.05475	0.162544	0.76901	0.54104-1.09304	0.0952429	0.77691	0.58775-1.02696	-0.02173	0.47087	0.023	31.31654	16	0.01226	30.21427	15	0.01117
GCST90199981	24	0.225481	1.13606	0.92967-1.3883	0.607308	0.95955	0.81975-1.12319	0.17178	1.08277	0.96605-1.21358	0.595699	0.92820	0.70758-1.21761	0.587093	0.93966	0.75300-1.17261	-0.00863	0.57095	0.254	27.00169	23	0.25590	26.60155	22	0.22675
GCST90199843	14	0.992539	0.99811	0.67704-1.4714	0.420564	0.93240	0.78639-1.10553	0.17312	0.91500	0.80522-1.03975	0.796933	0.96273	0.72510-1.27823	0.743261	0.95555	0.73214-1.24714	-0.01332	0.65028	0.871	7.56135	13	0.87096	7.34516	12	0.83399
GCST90200282	23	0.295193	1.15632	0.88699-1.5074	0.25025	1.10354	0.93292-1.30537	0.173298	1.09996	0.95900-1.26164	0.159104	1.25154	0.92556-1.69234	0.121506	1.26433	0.95040-1.68196	-0.00810	0.66828	0.029	35.88841	22	0.03121	35.56850	21	0.02443
GCST90200180	18	0.174685	0.80654	0.59949-1.0851	0.120162	0.87286	0.73530-1.03615	0.174387	0.90574	0.78515-1.04484	0.609629	0.91575	0.65729-1.27584	0.158338	0.83387	0.65509-1.06146	0.01865	0.39388	0.041	27.38208	17	0.05270	26.12832	16	0.05225
GCST90200783	17	0.121499	0.72544	0.49448-1.0643	0.00793095	0.76553	0.62850-0.93245	0.174685	0.89088	0.75397-1.05265	0.1686	0.73412	0.48230-1.11744	0.0496366	0.77658	0.61495-0.98070	0.03069	0.26261	0.089	24.66101	16	0.07603	22.61803	15	0.09259
GCST90200814	21	0.384609	1.14297	0.85158-1.5341	0.757682	1.03286	0.84110-1.26833	0.175812	1.11478	0.95251-1.30470	0.476216	0.87979	0.62263-1.24316	0.986258	0.99772	0.77160-1.29010	-0.00380	0.84453	0.102	27.81961	20	0.11374	27.76186	19	0.08812
GCST90199805	25	0.248066	0.84221	0.63398-1.1188	0.0668432	1.15891	0.98981-1.35690	0.176206	1.08800	0.96283-1.22946	0.491739	1.09326	0.85119-1.40418	0.134696	1.15127	0.96321-1.37605	0.04016	0.06533	0.239	29.72361	24	0.19408	25.56091	23	0.32203
GCST90200436	26	0.697561	1.04849	0.82812-1.3275	0.875934	0.98671	0.83420-1.16712	0.17622	1.08589	0.96366-1.22361	0.807022	0.96872	0.75270-1.24673	0.942198	0.99161	0.79142-1.24244	0.00561	0.73859	0.687	21.12975	25	0.68535	21.01577	24	0.63779
GCST90199873	35	0.184006	1.17077	0.93233-1.4702	0.0473961	1.16937	1.00180-1.36498	0.176647	1.07316	0.96868-1.18890	0.260185	1.16703	0.89589-1.52023	0.0864158	1.21134	0.97913-1.49863	-0.01112	0.40756	0.787	27.04041	34	0.79593	26.33665	33	0.78796
GCST90200438	17	0.22691	1.17106	0.91601-1.4971	0.0251614	1.25573	1.02877-1.53276	0.177064	1.10001	0.95783-1.26329	0.275389	1.20648	0.87105-1.67108	0.0373773	1.26257	1.03236-1.54412	-0.00960	0.55074	0.357	17.03220	16	0.38352	16.61941	15	0.34212
GCST90200360	17	0.524033	0.89350	0.63704-1.2532	0.179653	1.16993	0.93025-1.47137	0.178598	1.11870	0.95001-1.31734	0.619074	1.09986	0.76125-1.58908	0.434439	1.14566	0.82165-1.59746	0.03030	0.15765	0.518	15.00522	16	0.52426	12.79314	15	0.61827
GCST90200578	29	0.0413491	1.23619	1.01820-1.5008	0.107063	1.12516	0.97482-1.29867	0.178681	1.06560	0.97136-1.16898	0.246328	0.85173	0.65303-1.11089	0.123831	1.13551	0.97054-1.32853	-0.02511	0.10048	0.442	28.76014	28	0.42477	25.86760	27	0.52596
GCST90199877	15	0.408497	0.89836	0.70248-1.1489	0.388583	0.93080	0.79078-1.09561	0.179735	0.90752	0.78755-1.04575	0.299434	0.85653	0.64627-1.13520	0.821646	1.02065	0.85732-1.21508	0.00252	0.92124	0.04	24.76188	14	0.03699	24.74254	13	0.02495
GCST90200792	31	0.92499	1.01073	0.81087-1.2599	0.870128	0.98803	0.85521-1.14148	0.180094	1.07063	0.96895-1.18297	0.436305	1.12308	0.84175-1.49844	0.547272	0.93588	0.75608-1.15845	0.00793	0.57011	0.629	27.09071	30	0.61850	26.76075	29	0.58461
GCST90200605	20	0.255159	1.10739	0.93417-1.3127	0.596206	0.96389	0.84127-1.10437	0.181049	0.93176	0.84009-1.03344	0.475901	0.91239	0.71264-1.16813	0.648543	0.96138	0.81376-1.13578	-0.03836	0.02888	0.182	24.39970	19	0.18126	18.57850	18	0.41820
GCST90200271	29	0.319157	1.07606	0.93401-1.2397	0.212577	1.06289	0.96569-1.16988	0.181878	1.06454	0.97114-1.16692	0.914335	1.01497	0.77613-1.32731	0.157295	1.07280	0.97579-1.17946	-0.00258	0.84424	0.048	44.89709	28	0.02260	44.83175	27	0.01694
GCST90200549	22	0.244921	1.19393	0.89338-1.5956	0.783062	0.97808	0.83531-1.14525	0.183444	1.07889	0.96469-1.20661	0.750861	0.95823	0.73886-1.24272	0.753057	0.96910	0.79903-1.17537	-0.01409	0.46573	0.31	23.79783	21	0.30296	23.15749	20	0.28113
GCST90200230	20	0.961587	0.99115	0.69379-1.4160	0.242097	0.89580	0.74497-1.07717	0.184573	0.91129	0.79443-1.04533	0.211273	0.81439	0.59668-1.11154	0.227623	0.82572	0.61107-1.11577	-0.01267	0.62306	0.874	12.81621	19	0.84785	12.56609	18	0.81668
GCST90200036	34	0.193558	0.88409	0.73711-1.0604	0.208689	0.91873	0.80499-1.04853	0.186557	0.94084	0.85944-1.02995	0.865708	0.97556	0.73400-1.29662	0.51044	0.90748	0.68177-1.20792	0.01040	0.44414	0.222	38.25387	33	0.24309	37.54944	32	0.22979
GCST90199773	20	0.59474	1.13578	0.71645-1.8005	0.791707	0.97187	0.78639-1.20109	0.187939	0.90385	0.77758-1.05063	0.95776	1.01001	0.70202-1.45312	0.922609	1.01819	0.71119-1.45770	-0.02448	0.31758	0.849	13.22381	19	0.82692	12.16710	18	0.83849
GCST90200777	22	0.582215	1.08037	0.82395-1.4166	0.161893	0.87284	0.72139-1.05609	0.188392	0.91595	0.80363-1.04397	0.39938	0.85265	0.59296-1.22606	0.56556	0.91800	0.68880-1.22346	-0.02572	0.19024	0.341	22.87554	21	0.35065	20.94969	20	0.40010
GCST90200258	26	0.335764	0.90851	0.75022-1.1002	0.322988	0.93092	0.80773-1.07290	0.190304	0.92755	0.82882-1.03805	0.9944	1.00099	0.76151-1.31578	0.423367	0.94159	0.81456-1.08843	0.00371	0.79311	0.106	35.88577	25	0.07335	35.78090	24	0.05763
GCST90200170	32	0.419112	1.04670	0.93842-1.1675	0.212916	1.06078	0.96673-1.16397	0.1906	1.04784	0.97702-1.12379	0.264479	1.12211	0.91990-1.36876	0.252298	1.05519	0.96412-1.15488	0.00025	0.97997	0.933	20.88030	31	0.91503	20.87966	30	0.89161
GCST90200870	26	0.992274	1.00104	0.81325-1.2322	0.0240973	0.82857	0.70366-0.97566	0.191627	0.92396	0.82054-1.04042	0.301508	0.85054	0.62962-1.14897	0.172771	0.85054	0.67843-1.06630	-0.01488	0.36548	0.248	29.67541	25	0.23667	28.65933	24	0.23322
GCST90200679	25	0.457167	1.03932	0.94046-1.1486	0.984798	0.99912	0.91216-1.09436	0.193737	0.95300	0.88627-1.02476	0.34967	0.88132	0.67983-1.14254	0.931405	1.00364	0.92480-1.08919	-0.02649	0.02990	0.257	27.49655	24	0.28185	22.13831	23	0.51192
GCST90200898	34	0.0676077	1.48881	0.98574-2.2486	0.972262	1.00318	0.83876-1.19983	0.197719	1.10393	0.94973-1.28315	0.934803	0.98394	0.66954-1.44598	0.685385	0.93119	0.66157-1.31071	-0.03268	0.13770	0.013	52.99558	33	0.01510	49.41584	32	0.02536
GCST90200039	29	0.0613397	1.26095	0.99909-1.5914	0.0230765	1.13526	1.01758-1.26654	0.199099	1.07926	0.96065-1.21252	0.146698	1.18808	0.94748-1.48979	0.0176701	1.14139	1.02987-1.26498	-0.02961	0.14466	0.003	60.70277	28	0.00033	56.02081	27	0.00085
GCST90199759	25	0.32628	0.87951	0.68437-1.1303	0.328479	0.93614	0.82009-1.06862	0.199656	0.93030	0.83305-1.03890	0.99337	1.00100	0.79192-1.26528	0.627828	0.96104	0.82008-1.12622	0.01096	0.62852	0.056	36.55103	24	0.04848	36.17284	23	0.03961
GCST90200972	22	0.65896	1.10813	0.70715-1.7365	0.246531	1.13400	0.91673-1.40277	0.199945	1.10166	0.95005-1.27747	0.218625	1.28752	0.87121-1.90277	0.267785	1.23045	0.86098-1.75847	-0.00056	0.97866	0.515	20.32711	21	0.50063	20.32637	20	0.43769
GCST90199753	23	0.940917	0.98703	0.70183-1.3881	0.0519591	1.18524	0.99856-1.40683	0.201423	1.09660	0.95193-1.26326	0.0768188	1.33906	0.98386-1.82250	0.100019	1.26057	0.96776-1.64197	0.01507	0.51219	0.059	34.09895	22	0.04800	33.39207	21	0.04205
GCST90200426	25	0.0984128	1.19620	0.97559-1.4667	0.371241	1.07002	0.92250-1.24112	0.202467	1.07206	0.96327-1.19312	0.807835	1.03295	0.79776-1.33747	0.979827	0.99705	0.79458-1.25110	-0.01948	0.22833	0.825	17.80671	24	0.81228	16.27493	23	0.84325
GCST90199691	29	0.311166	0.85454	0.63400-1.1518	0.650477	0.96199	0.81354-1.13754	0.202526	0.92424	0.81876-1.04330	0.754456	0.94805	0.68084-1.32012	0.711035	0.95304	0.74084-1.22603	0.01032	0.57693	0.274	32.56945	28	0.25196	32.18926	27	0.22515
GCST90199677	22	0.0275823	0.70155	0.52372-0.9398	0.344373	0.91611	0.76396-1.09856	0.20266	0.92131	0.81216-1.04512	0.438284	0.87195	0.62068-1.22493	0.580598	0.91148	0.65942-1.25988	0.04091	0.05775	0.354	22.13908	21	0.39153	18.08627	20	0.58173
GCST90200595	12	0.889597	1.02901	0.69415-1.5254	0.371476	0.89448	0.70043-1.14230	0.204115	0.88518	0.73331-1.06852	0.612885	0.90999	0.63804-1.29785	0.609765	0.90683	0.62960-1.30613	-0.02158	0.41336	0.951	5.17110	11	0.92260	4.44264	10	0.92518
GCST90200128	16	0.212876	1.26517	0.88869-1.8011	0.420123	1.09437	0.87892-1.36265	0.20426	1.10789	0.94580-1.29775	0.952009	1.01005	0.73321-1.39142	0.603968	1.08228	0.80781-1.45000	-0.02946	0.42382	0.651	12.37068	15	0.65078	11.69188	14	0.63103
GCST90200689	33	0.515736	0.97109	0.88976-1.0598	0.65689	0.98431	0.91797-1.05544	0.204681	0.96068	0.90293-1.02212	0.573932	0.93275	0.73360-1.18597	0.656865	0.98289	0.91148-1.05990	-0.00362	0.73068	0.394	34.21224	32	0.36190	34.07961	31	0.32169
GCST90200265	18	0.37439	1.07461	0.92092-1.2539	0.177798	1.06860	0.97030-1.17686	0.20487	1.06853	0.96446-1.18383	0.268466	1.18929	0.88369-1.60058	0.162301	1.08240	0.97331-1.20373	-0.00130	0.92256	0.174	25.72337	17	0.07965	25.70770	16	0.05828
GCST90200450	22	0.134388	1.15554	0.96364-1.3856	0.934732	1.00595	0.87275-1.15949	0.205049	1.06535	0.96599-1.17494	0.985237	1.00222	0.79488-1.26363	0.717698	1.03164	0.87331-1.21867	-0.02226	0.31055	0.35	23.14734	21	0.33617	21.95879	20	0.34275
GCST90200066	24	0.394173	0.85823	0.60795-1.2115	0.170635	0.86215	0.69732-1.06593	0.210418	0.90355	0.77093-1.05898	0.0816957	0.63636	0.39118-1.03520	0.0870566	0.64214	0.39508-1.04370	0.00649	0.74354	0.116	31.05746	23	0.12139	30.90326	22	0.09811
GCST90199735	24	0.420381	1.05084	0.93354-1.1829	0.195174	1.06330	0.96900-1.16677	0.211022	1.05291	0.97119-1.14152	0.789775	1.03010	0.83040-1.27783	0.1747	1.06505	0.97514-1.16324	0.00063	0.96405	0.288	28.19814	23	0.20838	28.19547	22	0.16929
GCST90200485	19	0.121705	0.75174	0.53327-1.0597	0.0669122	0.82763	0.67599-1.01328	0.211209	0.90583	0.77573-1.05775	0.204223	0.80756	0.58759-1.10988	0.0795756	0.78529	0.60858-1.01333	0.02640	0.25058	0.098	25.85704	18	0.10307	23.87019	17	0.12301
GCST90200049	30	0.966881	1.00399	0.83350-1.2093	0.159532	0.89427	0.76533-1.04494	0.211261	0.93872	0.85010-1.03657	0.490148	1.11725	0.81871-1.52464	0.553183	0.94070	0.77042-1.14862	-0.01006	0.40895	0.416	29.62519	29	0.43289	28.89983	28	0.41762
GCST90199747	24	0.697288	0.93134	0.65387-1.3266	0.295215	0.91685	0.77929-1.07868	0.21137	0.92507	0.81871-1.04525	0.398402	0.90424	0.71897-1.13726	0.355359	0.91856	0.76993-1.09589	-0.00100	0.96843	0.31	26.35416	23	0.28443	26.35224	22	0.23687
GCST90199675	29	0.338076	1.08848	0.91796-1.2907	0.575117	1.03508	0.91752-1.16769	0.211772	1.06064	0.96702-1.16332	0.413763	1.11687	0.86020-1.45013	0.4844	1.04243	0.92925-1.16939	-0.00506	0.72375	0.275	32.76047	28	0.24468	32.60642	27	0.21037
GCST90200143	25	0.433934	1.10229	0.86737-1.4008	0.185755	1.10332	0.95379-1.27629	0.212129	1.06572	0.96432-1.17777	0.360531	1.12131	0.88140-1.42651	0.230693	1.10614	0.94186-1.29907	-0.00477	0.76321	0.447	25.21206	24	0.39431	25.11059	23	0.34461
GCST90199656	21	0.614283	0.92184	0.67524-1.2585	0.59852	0.94831	0.77829-1.15546	0.21423	0.90321	0.76917-1.06061	0.668961	1.09455	0.72781-1.64609	0.928636	1.01544	0.72920-1.41404	-0.00273	0.88118	0.121	27.76798	20	0.11501	27.73447	19	0.08867
GCST90199671	16	0.415241	0.84033	0.55986-1.2613	0.657836	0.94950	0.75493-1.19422	0.214456	0.88654	0.73304-1.07220	0.583459	0.90306	0.63218-1.29000	0.643958	0.93961	0.72532-1.21721	0.00805	0.77223	0.123	21.68082	15	0.11645	21.54677	14	0.08842
GCST90199630	26	0.279435	1.15753	0.89331-1.4999	0.466217	1.06635	0.89713-1.26749	0.214673	1.09564	0.94844-1.26569	0.221746	0.79362	0.55284-1.13927	0.191423	1.19100	0.92279-1.53716	-0.01065	0.61890	0.003	47.53753	25	0.00423	47.03979	24	0.00331
GCST90200533	14	0.354713	0.86166	0.63632-1.1668	0.41712	0.91257	0.73164-1.13826	0.214714	0.90625	0.77573-1.05873	0.249167	0.79703	0.55132-1.15225	0.57678	0.90649	0.64771-1.26866	0.00720	0.70935	0.491	12.44361	13	0.49165	12.29433	12	0.42234
GCST90199874	20	0.309729	1.32918	0.77956-2.2663	0.570889	1.06275	0.86103-1.31174	0.214782	1.11621	0.93823-1.32795	0.774716	0.94252	0.63198-1.40563	0.629131	0.91423	0.63910-1.30782	-0.02105	0.50542	0.08	28.78714	19	0.06941	28.06703	18	0.06104
GCST90199923	19	0.736021	1.03871	0.83592-1.2907	0.833831	1.01419	0.88910-1.15687	0.215217	1.07482	0.95891-1.20474	0.714193	0.95601	0.75427-1.21170	0.882388	1.00855	0.90243-1.12715	0.00619	0.71887	0.193	24.68127	18	0.13395	24.48829	17	0.10676
GCST90199771	23	0.0424273	1.35377	1.02853-1.7819	0.643958	1.04588	0.86470-1.26501	0.215256	1.10047	0.94584-1.28039	0.593282	0.90023	0.61559-1.31651	0.771893	1.04161	0.79335-1.36756	-0.03250	0.09663	0.085	31.35989	22	0.08898	27.41146	21	0.15765
GCST90200524	16	0.21474	1.10858	0.94896-1.2950	0.282077	1.08286	0.93665-1.25190	0.215747	1.06865	0.96201-1.18710	0.862745	0.97676	0.75159-1.26939	0.154723	1.12070	0.96553-1.30081	-0.01010	0.54024	0.585	12.59212	15	0.63377	12.19798	14	0.59041
GCST90200447	21	0.446367	1.14137	0.81787-1.5928	0.483943	0.93495	0.77446-1.12871	0.215779	0.90803	0.77939-1.05790	0.415732	0.86928	0.62470-1.20961	0.339467	0.87400	0.66736-1.14461	-0.02922	0.14964	0.088	29.78684	20	0.07338	26.62689	19	0.11365
GCST90200714	21	0.00562776	0.68187	0.53611-0.8672	0.133128	0.86513	0.71609-1.04518	0.215792	0.91519	0.79536-1.05307	0.65476	0.91122	0.60992-1.36134	0.0712249	0.80001	0.63592-1.00643	0.04216	0.01043	0.215	23.67994	20	0.25665	15.60459	19	0.68348
GCST90200822	29	0.194005	0.85158	0.67229-1.0787	0.413716	0.92820	0.77633-1.10978	0.215842	0.92392	0.81510-1.04727	0.964231	0.99228	0.70946-1.38785	0.634544	0.93316	0.70375-1.23735	0.01159	0.43117	0.295	31.36894	28	0.30094	30.64407	27	0.28600
GCST90200121	23	0.159025	0.86009	0.70257-1.0529	0.137377	0.89083	0.76481-1.03760	0.216365	0.93308	0.83604-1.04138	0.337909	1.15759	0.86377-1.55137	0.224158	0.89691	0.75631-1.06364	0.01676	0.35756	0.202	28.11004	22	0.17206	26.97342	21	0.17173
GCST90199775	16	0.33586	1.08912	0.92080-1.2882	0.258152	1.09324	0.93672-1.27593	0.216557	1.07398	0.95903-1.20270	0.573901	1.09498	0.80362-1.49199	0.234003	1.09498	0.94868-1.26384	-0.00326	0.82808	0.936	7.95133	15	0.92572	7.90237	14	0.89435
GCST90199859	28	0.0400833	1.27807	1.02309-1.5966	0.466243	1.05900	0.90766-1.23559	0.216603	1.06461	0.96396-1.17577	0.905192	0.98409	0.75774-1.27807	0.684554	1.04501	0.84696-1.28937	-0.02525	0.08369	0.488	26.32169	27	0.50081	23.08650	26	0.62805
GCST90199666	28	0.571515	1.06647	0.85578-1.3290	0.838088	1.01566	0.87506-1.17884	0.216889	0.93615	0.84307-1.03951	0.810747	1.03134	0.80309-1.32448	0.635849	1.04764	0.86596-1.26743	-0.01789	0.19848	0.859	19.25110	27	0.86067	17.50983	26	0.89287
GCST90199631	17	0.193517	0.73072	0.46514-1.1479	0.464497	0.91253	0.71406-1.16618	0.21696	0.89285	0.74584-1.06885	0.561806	0.88041	0.57770-1.34175	0.679476	0.91951	0.62205-1.35922	0.02650	0.35816	0.741	12.34462	16	0.71994	11.44596	15	0.72039
GCST90200626	24	0.633797	1.04364	0.87758-1.2411	0.878837	1.00991	0.88963-1.14645	0.21709	0.94826	0.87155-1.03173	0.584656	1.06980	0.84277-1.35797	0.564103	1.04499	0.90179-1.21093	-0.02001	0.22772	0.735	17.70156	23	0.77347	16.16181	22	0.80777
GCST90200987	31	0.490233	0.86889	0.58585-1.2887	0.600384	0.95538	0.80539-1.13330	0.217743	0.91061	0.78463-1.05682	0.649539	0.91868	0.63954-1.31965	0.987168	1.00425	0.60157-1.67647	0.00563	0.80241	<0.001	61.53162	30	0.00060	61.39660	29	0.00041
GCST90200085	22	0.185201	1.18337	0.93041-1.5051	0.50187	1.05434	0.90347-1.23040	0.217849	1.07587	0.95773-1.20859	0.297911	1.14427	0.89342-1.46554	0.546747	1.05208	0.89434-1.23763	-0.01578	0.38501	0.277	25.42757	21	0.22912	24.46271	20	0.22276
GCST90200340	23	0.529013	0.92022	0.71339-1.1870	0.13587	0.88165	0.74714-1.04038	0.218599	0.92378	0.81417-1.04815	0.2063	0.79791	0.56805-1.12078	0.295877	0.86878	0.67157-1.12391	0.00056	0.97276	0.244	26.51260	22	0.23033	26.51109	21	0.18763
GCST90200248	22	0.903879	1.01131	0.84448-1.2111	0.117031	1.13818	0.96810-1.33814	0.218758	1.07426	0.95836-1.20417	0.842548	1.02742	0.78935-1.33728	0.219616	1.11160	0.94357-1.30954	0.01131	0.40431	0.25	25.11891	21	0.24205	24.23920	20	0.23210
GCST90200794	25	0.347393	1.08175	0.92129-1.2702	0.222298	1.05653	0.96723-1.15409	0.218844	1.06737	0.96201-1.18427	0.292829	1.12944	0.90475-1.40993	0.190305	1.05702	0.97513-1.14579	-0.00403	0.82964	0.001	58.04360	24	0.00012	57.92432	23	0.00008
GCST90200038	23	0.0985945	0.78573	0.59774-1.0328	0.438413	0.93078	0.77632-1.11596	0.220394	0.92337	0.81282-1.04895	0.380707	1.20629	0.79982-1.81932	0.225369	0.76627	0.50434-1.16426	0.02138	0.20692	0.319	23.43624	22	0.37746	21.68492	21	0.41786
GCST90200174	27	0.495079	0.94398	0.80183-1.1113	0.883606	1.00963	0.88807-1.14782	0.221963	1.05941	0.96570-1.16221	0.519	1.09843	0.82897-1.45546	0.84972	1.01129	0.90141-1.13458	0.02474	0.10490	0.515	25.33743	26	0.49995	22.50618	25	0.60637
GCST90200082	33	0.396022	1.08309	0.90308-1.2990	0.166989	1.07490	0.97024-1.19084	0.222218	1.06433	0.96294-1.17638	0.506934	1.06658	0.88358-1.28748	0.0879965	1.08192	0.99108-1.18109	-0.00358	0.82170	0.004	61.00191	32	0.00149	60.90043	31	0.00106
GCST90200499	15	0.896152	0.98299	0.76357-1.2655	0.0900034	0.85803	0.71882-1.02419	0.222745	0.92501	0.81608-1.04849	0.226836	0.82790	0.61774-1.10957	0.208055	0.85255	0.67274-1.08044	-0.00976	0.59616	0.521	13.16258	14	0.51376	12.86747	13	0.45810
GCST90200534	18	0.21849	0.75360	0.48881-1.1618	0.208826	0.87420	0.70884-1.07813	0.223665	0.91302	0.78853-1.05715	0.291879	0.79872	0.53274-1.19748	0.229093	0.78419	0.53525-1.14892	0.02442	0.36952	0.679	13.73394	17	0.68584	12.88127	16	0.68142
GCST90200287	21	0.845019	1.02143	0.82819-1.2598	0.761371	1.02789	0.86068-1.22759	0.224001	1.08092	0.95350-1.22538	0.668209	1.06009	0.81501-1.37885	0.848075	1.02117	0.82647-1.26173	0.01007	0.51705	0.75	15.04848	20	0.77363	14.61262	19	0.74688
GCST90199971	30	0.279567	1.09168	0.93407-1.2759	0.998562	1.00012	0.88175-1.13437	0.224934	1.05153	0.96957-1.14041	0.716828	1.04620	0.82158-1.33224	0.97076	1.00281	0.86428-1.16354	-0.00689	0.58385	0.368	30.19690	29	0.40422	29.86928	28	0.36949
GCST90199811	22	0.343057	1.04237	0.95863-1.1334	0.235409	1.05220	0.96737-1.14447	0.225931	1.04042	0.97579-1.10933	0.872561	0.98355	0.80507-1.20159	0.197751	1.04969	0.97730-1.12744	-0.00091	0.94430	0.464	23.58530	21	0.31358	23.57940	20	0.26125
GCST90200305	20	0.385495	0.85112	0.59664-1.2141	0.191387	0.87843	0.72320-1.06698	0.226143	0.91631	0.79539-1.05562	0.635107	0.92736	0.68255-1.25996	0.346699	0.90483	0.73849-1.10864	0.00998	0.66102	0.281	22.91018	19	0.24132	22.65994	18	0.20400
GCST90199795	19	0.0221434	1.41186	1.07936-1.8468	0.492113	1.07241	0.87849-1.30915	0.226425	1.09804	0.94363-1.27773	0.951852	1.01193	0.69218-1.47941	0.813467	1.04255	0.74123-1.46638	-0.03550	0.04706	0.239	21.84684	18	0.23886	17.20710	17	0.44042
GCST90200423	22	0.992467	1.00150	0.73692-1.3611	0.462308	0.93620	0.78528-1.11613	0.227249	0.92404	0.81284-1.05046	0.586219	0.90710	0.64199-1.28169	0.579861	0.91731	0.67897-1.23930	-0.01029	0.57763	0.64	18.83357	21	0.59582	18.51310	20	0.55365
GCST90199879	24	0.0642599	1.04967	0.99971-1.1021	0.2085	1.04030	0.97818-1.10636	0.22832	1.02703	0.98342-1.07258	0.968299	1.00453	0.80571-1.25241	0.110823	1.04170	0.99260-1.09323	-0.01786	0.06795	0.484	21.64113	23	0.54200	17.95561	22	0.70862
GCST90199955	34	0.148187	1.03974	0.98750-1.0947	0.215198	1.03431	0.98058-1.09099	0.228644	1.02752	0.98309-1.07395	0.255323	0.89613	0.74426-1.07898	0.184941	1.03294	0.98560-1.08256	-0.00737	0.38443	0.316	40.52506	33	0.17241	39.56358	32	0.16809
GCST90200367	16	0.692267	0.91245	0.58507-1.4230	0.628445	1.06366	0.82841-1.36570	0.228878	1.11075	0.93608-1.31803	0.889308	0.96877	0.62437-1.50314	0.97552	0.99295	0.63660-1.54878	0.02191	0.36327	0.608	12.59294	15	0.63371	11.70978	14	0.62960
GCST90200813	20	0.291036	0.81955	0.57260-1.1730	0.295129	0.90280	0.74551-1.09328	0.228978	0.91530	0.79240-1.05727	0.369203	0.85219	0.60606-1.19827	0.386661	0.87512	0.65151-1.17548	0.01613	0.51656	0.413	19.73107	19	0.41092	19.26255	18	0.37583
GCST90200811	25	0.414932	1.09798	0.88057-1.3691	0.426084	1.06754	0.90883-1.25398	0.229049	1.07424	0.95592-1.20719	0.71183	1.05748	0.78886-1.41758	0.460711	1.10314	0.85346-1.42587	-0.00366	0.81963	0.271	27.90017	24	0.26427	27.83579	23	0.22206
GCST90199864	36	0.759691	0.96546	0.77215-1.2072	0.653179	0.96828	0.84128-1.11445	0.230432	0.93468	0.83699-1.04378	0.917709	0.98411	0.72778-1.33072	0.416684	1.07323	0.90678-1.27022	-0.00502	0.74470	0.023	51.99309	35	0.03220	51.82880	34	0.02575
GCST90200051	26	0.831577	1.02387	0.82578-1.2695	0.221393	1.08256	0.95331-1.22933	0.23055	1.06900	0.95853-1.19220	0.285468	1.16718	0.88425-1.54065	0.219181	1.07868	0.95883-1.21351	0.00746	0.65043	0.152	33.94843	25	0.10901	33.65314	24	0.09102
GCST90199651	21	0.868687	1.02023	0.80719-1.2895	0.421998	1.08323	0.89118-1.31668	0.231045	1.08256	0.95076-1.23264	0.596339	1.08755	0.80118-1.47628	0.49598	1.08277	0.86482-1.35565	0.00825	0.55805	0.999	6.92919	20	0.99691	6.57369	19	0.99616
GCST90199960	23	0.689492	1.02930	0.89508-1.1837	0.73742	0.98240	0.88554-1.08986	0.234388	0.94151	0.85246-1.03985	0.137065	0.83152	0.65781-1.05111	0.616243	0.97310	0.87599-1.08097	-0.02412	0.10206	0.156	31.43982	22	0.08746	27.59838	21	0.15191
GCST90200915	14	0.486611	0.83086	0.50096-1.3780	0.449009	0.90490	0.69863-1.17208	0.234935	0.89016	0.73465-1.07859	0.368178	0.82298	0.54640-1.23956	0.336998	0.83365	0.58296-1.19215	0.00789	0.77638	0.408	14.22873	13	0.35793	14.12936	12	0.29252
GCST90199897	28	0.262808	0.86603	0.67696-1.1079	0.0442098	0.83367	0.69829-0.99530	0.23538	0.92900	0.82259-1.04917	0.214332	0.80379	0.57404-1.12549	0.123066	0.78457	0.58197-1.05772	0.00968	0.52627	0.576	25.22934	27	0.56161	24.81674	26	0.52937
GCST90199722	26	0.931696	1.00788	0.84380-1.2039	0.797518	0.98148	0.85087-1.13214	0.236426	0.94389	0.85784-1.03857	0.517429	0.92273	0.72582-1.17307	0.740019	0.97536	0.84308-1.12839	-0.01214	0.39918	0.725	20.41253	25	0.72486	19.67572	24	0.71506
GCST90200775	19	0.275841	0.77212	0.49223-1.2112	0.635224	0.95396	0.78515-1.15906	0.236654	0.90947	0.77720-1.06425	0.73306	1.05958	0.76368-1.47013	0.816976	0.96709	0.73146-1.27864	0.01923	0.45655	0.113	25.66623	18	0.10764	24.81872	17	0.09884
GCST90200905	18	0.339939	0.83740	0.58799-1.1926	0.094703	0.83133	0.66939-1.03245	0.236991	0.91281	0.78471-1.06181	0.166017	0.74832	0.50532-1.10818	0.209642	0.76874	0.51770-1.14149	0.01088	0.60426	0.631	14.43814	17	0.63588	14.15861	16	0.58690
GCST90200065	32	0.188206	1.19175	0.92320-1.5384	0.0544618	1.14220	0.99746-1.30795	0.238025	1.07187	0.95515-1.20284	0.502745	1.10145	0.83304-1.45633	0.0545602	1.14385	1.00256-1.30505	-0.01642	0.36867	0.014	51.28842	31	0.01240	49.90273	30	0.01269
GCST90200556	32	0.984912	0.99853	0.85841-1.1615	0.365385	1.06130	0.93302-1.20722	0.238807	1.05533	0.96488-1.15426	0.369161	1.11888	0.87875-1.42464	0.284938	1.10622	0.92230-1.32681	0.01220	0.37949	0.292	34.75065	31	0.29379	33.85281	30	0.28676
GCST90201017	21	0.881334	0.97490	0.70133-1.3552	0.936704	0.99041	0.78071-1.25643	0.239007	0.90845	0.77427-1.06589	0.919167	1.02137	0.68244-1.52863	0.477795	1.12348	0.81953-1.54017	-0.01015	0.63641	0.551	18.85207	20	0.53146	18.62127	19	0.48136
GCST90199853	28	0.159431	1.11310	0.96287-1.2868	0.0750855	1.11183	0.98933-1.24949	0.239237	1.05286	0.96630-1.14718	0.225293	1.16762	0.91412-1.49142	0.0708567	1.12749	0.99495-1.27770	-0.01177	0.35882	0.353	29.15223	27	0.35356	28.20555	26	0.34842
GCST90200835	24	0.291245	1.10249	0.92378-1.3158	0.296751	1.07236	0.94048-1.22274	0.239604	1.05557	0.96459-1.15513	0.467468	1.08504	0.87381-1.34732	0.376142	1.08145	0.91234-1.28190	-0.00904	0.57893	0.471	23.18558	23	0.44998	22.85594	22	0.40990
GCST90200974	22	0.385656	0.87131	0.64264-1.1814	0.268055	0.89137	0.72723-1.09255	0.239937	0.91961	0.79965-1.05757	0.333199	0.83104	0.57621-1.19859	0.3908	0.86150	0.61722-1.20247	0.00681	0.69993	0.61	18.11071	21	0.64199	17.95783	20	0.59019
GCST90200553	26	0.535075	1.06079	0.88268-1.2748	0.509461	1.04993	0.90842-1.21349	0.239959	1.05881	0.96255-1.16471	0.65393	0.94253	0.72988-1.21713	0.5564	1.05271	0.88913-1.24638	-0.00035	0.98160	0.736	19.53184	25	0.77093	19.53130	24	0.72309
GCST90199686	17	0.394031	0.85660	0.60623-1.2104	0.152837	1.15083	0.94921-1.39527	0.241232	1.08583	0.94613-1.24615	0.438727	1.13972	0.82531-1.57393	0.32519	1.13972	0.88536-1.46716	0.03321	0.16338	0.775	11.70614	16	0.76395	9.55790	15	0.84659
GCST90200604	24	0.041703	0.83693	0.71223-0.9835	0.25882	0.91734	0.78976-1.06554	0.241261	0.94489	0.85941-1.03886	0.412657	0.90050	0.70399-1.15187	0.235702	0.90345	0.76722-1.06386	0.02740	0.08210	0.716	18.68538	23	0.71933	15.36628	22	0.84605
GCST90199866	27	0.292938	1.04353	0.96548-1.1279	0.207362	1.05447	0.97102-1.14510	0.242098	1.03768	0.97532-1.10404	0.896821	1.01591	0.80218-1.28658	0.18772	1.05515	0.97620-1.14049	-0.00237	0.81641	0.87	17.45973	26	0.89454	17.40468	25	0.86660
GCST90200781	16	0.908158	1.02828	0.64572-1.6375	0.948655	1.00672	0.82117-1.23419	0.242635	1.09043	0.94304-1.26086	0.893405	0.97593	0.68742-1.38552	0.944887	0.98775	0.70057-1.39266	0.00722	0.79848	0.543	13.79097	15	0.54144	13.72325	14	0.47053
GCST90200708	38	0.392778	0.96027	0.87600-1.0527	0.682064	0.98389	0.91032-1.06340	0.244437	0.96454	0.90764-1.02500	0.799779	0.97244	0.78480-1.20495	0.619799	0.98041	0.90727-1.05943	0.00123	0.90033	0.575	35.30602	37	0.54860	35.29011	36	0.50216
GCST90200328	24	0.847597	0.97485	0.75416-1.2601	0.235937	0.91040	0.77949-1.06329	0.244928	0.93626	0.83787-1.04619	0.142226	0.81805	0.63137-1.05992	0.209319	0.85258	0.66931-1.08603	-0.00551	0.73551	0.924	14.16369	23	0.92209	14.04664	22	0.89982
GCST90199894	15	0.448474	0.85752	0.58322-1.2608	0.133	0.83714	0.66386-1.05564	0.245925	0.90025	0.75383-1.07511	0.389862	0.81413	0.51694-1.28218	0.138552	0.75936	0.53861-1.07059	0.00630	0.78296	0.222	17.33095	14	0.23897	17.22615	13	0.18917
GCST90200853	18	0.952877	1.01004	0.72886-1.3997	0.48785	1.07223	0.88047-1.30577	0.246133	1.09280	0.94061-1.26961	0.835282	1.03737	0.73793-1.45834	0.768341	1.04623	0.77821-1.40655	0.01155	0.59944	0.216	21.34837	17	0.21109	20.97201	16	0.17959
GCST90199639	28	0.931631	0.99509	0.89028-1.1122	0.610542	0.97485	0.88382-1.07526	0.246194	0.96063	0.89759-1.02811	0.232847	0.88935	0.73669-1.07364	0.739155	0.98492	0.90150-1.07607	-0.00887	0.44060	0.684	22.20248	27	0.72702	21.58911	26	0.71095
GCST90200784	28	0.156225	0.79389	0.58238-1.0822	0.0914515	0.85724	0.71682-1.02516	0.250246	0.92742	0.81563-1.05453	0.322445	0.82579	0.56912-1.19820	0.223261	0.81436	0.58965-1.12471	0.02053	0.29003	0.331	29.36144	27	0.34359	28.10066	26	0.35352
GCST90200050	18	0.274164	0.81722	0.57624-1.1590	0.105838	0.84162	0.68290-1.03723	0.250763	0.90668	0.76709-1.07167	0.391501	1.23504	0.77147-1.97718	0.126576	0.75701	0.53902-1.06317	0.01682	0.51424	0.03	28.02046	17	0.04470	27.26229	16	0.03866
GCST90200472	22	0.0815531	0.76239	0.57051-1.0188	0.292873	0.91053	0.76461-1.08429	0.252994	0.92835	0.81725-1.05456	0.492213	0.89273	0.64944-1.22715	0.658212	0.93337	0.69065-1.26139	0.02800	0.15378	0.629	18.12890	21	0.64083	15.93093	20	0.72090
GCST90200352	22	0.935585	1.00721	0.84798-1.1963	0.568844	1.03749	0.91410-1.17754	0.253184	1.06038	0.95893-1.17256	0.281366	1.14529	0.90049-1.45663	0.582477	1.03773	0.91122-1.18181	0.01030	0.47604	0.372	23.29656	21	0.32837	22.69780	20	0.30388
GCST90200256	36	0.97092	1.00078	0.96012-1.0432	0.833397	0.99523	0.95189-1.04055	0.254424	0.97924	0.94454-1.01522	0.865498	0.98919	0.87314-1.12068	0.575678	0.98919	0.95261-1.02719	-0.01657	0.04468	0.587	34.13490	35	0.50970	29.78899	34	0.67422
GCST90200413	24	0.164255	0.84307	0.66815-1.0638	0.177582	0.89079	0.75294-1.05388	0.254836	0.93647	0.83643-1.04848	0.683325	0.93994	0.70062-1.26100	0.166452	0.88799	0.75448-1.04513	0.01556	0.32202	0.429	24.27489	23	0.38872	23.19282	22	0.39091
GCST90200281	24	0.863682	1.01402	0.86663-1.1865	0.473647	0.94379	0.80567-1.10560	0.256343	0.94366	0.85374-1.04305	0.176876	0.83932	0.65600-1.07386	0.401938	0.93278	0.79510-1.09431	-0.01440	0.25659	0.551	22.16197	23	0.51049	20.80530	22	0.53280
GCST90200659	26	0.87459	1.01205	0.87354-1.1725	0.887382	0.98995	0.86082-1.13845	0.256569	0.94883	0.86651-1.03896	0.910803	0.98492	0.75697-1.28151	0.90127	0.99118	0.86300-1.13841	-0.01186	0.28604	0.653	21.55169	25	0.66148	20.36110	24	0.67607
GCST90199852	24	0.371722	0.90294	0.72503-1.1245	0.305022	0.93049	0.81082-1.06782	0.256862	0.94400	0.85450-1.04288	0.612558	0.93732	0.73211-1.20006	0.184098	0.87351	0.71979-1.06006	0.00683	0.66012	0.976	10.73005	23	0.98578	10.53134	22	0.98081
GCST90200325	23	0.871389	1.01575	0.84258-1.2245	0.740803	1.03120	0.85958-1.23708	0.257202	1.07072	0.95135-1.20505	0.286043	1.20344	0.86349-1.67722	0.588313	1.05082	0.88047-1.25414	0.00852	0.48348	0.65	19.96249	22	0.58539	19.45362	21	0.55607
GCST90200801	25	0.27601	1.16682	0.88984-1.5300	0.357926	1.08030	0.91628-1.27368	0.257929	1.06947	0.95199-1.20145	0.282249	1.19019	0.87273-1.62313	0.270827	1.16953	0.89073-1.53560	-0.01057	0.49238	0.643	21.34061	24	0.61856	20.85389	23	0.59001
GCST90200321	18	0.710974	1.08693	0.70484-1.6762	0.446581	1.08532	0.87901-1.34005	0.258066	1.09400	0.93626-1.27832	0.45159	1.17745	0.77709-1.78408	0.618454	1.09448	0.77220-1.55127	0.00081	0.97519	0.234	20.92211	17	0.22979	20.92081	16	0.18157
GCST90200588	20	0.0593215	1.27551	1.00642-1.6166	0.728043	1.03112	0.86753-1.22557	0.258212	1.07280	0.94975-1.21180	0.90666	0.98461	0.76232-1.27171	0.949517	1.00815	0.78666-1.29201	-0.02888	0.11238	0.524	17.88619	19	0.53005	15.10003	18	0.65509
GCST90200537	23	0.842699	1.02012	0.83998-1.2389	0.563202	1.04431	0.90154-1.20969	0.259149	1.05918	0.95851-1.17042	0.297256	1.15283	0.88792-1.49677	0.439918	1.06776	0.90683-1.25725	0.00663	0.66192	0.531	21.62157	22	0.48266	21.42091	21	0.43351
GCST90200780	17	0.715646	0.92039	0.59395-1.4262	0.567144	0.93511	0.74314-1.17668	0.259495	0.89838	0.74570-1.08232	0.668427	0.92405	0.64804-1.31762	0.576384	0.91450	0.67264-1.24333	-0.00295	0.90566	0.246	19.90940	16	0.22433	19.89014	15	0.17619
GCST90200062	24	0.518802	0.91070	0.68857-1.2045	0.544302	1.05504	0.88726-1.25453	0.259734	1.07840	0.94574-1.22967	0.59504	1.09122	0.79443-1.49889	0.977103	1.00326	0.80512-1.25016	0.02472	0.19531	0.153	29.52634	23	0.16349	27.31154	22	0.19963
GCST90200207	23	0.226974	1.18864	0.90545-1.5604	0.123909	1.12054	0.96931-1.29536	0.260841	1.05909	0.95824-1.17055	0.12411	1.26693	0.94797-1.69322	0.120514	1.25918	0.95200-1.66548	-0.02486	0.38122	0.264	25.49761	22	0.27388	24.56188	21	0.26664
GCST90200060	21	0.897911	1.03855	0.58725-1.8367	0.552957	1.06821	0.85899-1.32840	0.262002	1.13991	0.90677-1.43299	0.70107	1.08617	0.71652-1.64651	0.816657	1.05093	0.69436-1.59062	0.01094	0.72939	<0.001	54.51816	20	0.00005	54.16676	19	0.00003
GCST90199720	26	0.821795	1.01813	0.87225-1.1884	0.865023	0.98935	0.87449-1.11931	0.263539	0.95037	0.86923-1.03908	0.521513	0.92407	0.72832-1.17243	0.798759	0.98457	0.87475-1.10818	-0.01492	0.29577	0.978	11.76168	25	0.98838	10.61925	24	0.99148
GCST90200335	33	0.832181	0.97395	0.76456-1.2407	0.897856	0.98967	0.84453-1.15975	0.263936	0.93423	0.82911-1.05267	0.933694	0.98574	0.70468-1.37890	0.852089	0.97984	0.79238-1.21165	-0.00661	0.69972	0.014	52.67280	32	0.01212	52.41656	31	0.00947
GCST90200569	20	0.646486	0.93468	0.70372-1.2415	0.654328	1.04315	0.86703-1.25505	0.264164	1.08437	0.94065-1.25004	0.997556	0.99949	0.72339-1.38097	0.7872	0.96978	0.77852-1.20803	0.02350	0.25290	0.223	23.92977	19	0.19886	22.20840	18	0.22286
GCST90200469	25	0.786844	0.96207	0.72929-1.2691	0.514665	0.93110	0.75115-1.15415	0.26444	0.91764	0.78906-1.06717	0.487949	0.86552	0.57911-1.29359	0.445082	0.90612	0.70648-1.16217	-0.00736	0.69133	0.036	38.61421	24	0.02996	38.34468	23	0.02339
GCST90200925	23	0.328251	1.16493	0.86392-1.5708	0.339663	1.09727	0.90691-1.32758	0.26534	1.08629	0.93906-1.25661	0.457075	1.14428	0.80721-1.62211	0.557369	1.09486	0.81263-1.47510	-0.01015	0.60335	0.215	27.16709	22	0.20495	26.81178	21	0.17717
GCST90200153	35	0.0886841	1.17721	0.98104-1.4126	0.114247	1.10364	0.97652-1.24731	0.265585	1.05764	0.95827-1.16731	0.327629	1.12177	0.89418-1.40728	0.126621	1.16520	0.96226-1.41093	-0.01979	0.18222	0.019	53.21816	34	0.01904	50.38327	33	0.02692
GCST90199634	29	0.469426	0.93686	0.78707-1.1152	0.074701	0.88420	0.77227-1.01235	0.266742	0.93799	0.83778-1.05018	0.180891	0.84282	0.66017-1.07600	0.0575642	0.85587	0.73369-0.99840	0.00028	0.98577	0.013	46.37359	28	0.01594	46.37303	27	0.01160
GCST90200701	27	0.512908	1.04648	0.91511-1.1967	0.552496	1.03039	0.93348-1.13734	0.267087	1.04938	0.96375-1.14261	0.421653	0.88710	0.66539-1.18269	0.617729	1.02793	0.92372-1.14389	0.00056	0.95815	0.358	29.76405	26	0.27750	29.76071	25	0.23337
GCST90200240	25	0.544871	0.93276	0.74706-1.1646	0.937743	1.00661	0.85325-1.18753	0.268052	0.93558	0.83157-1.05259	0.736528	1.05247	0.78402-1.41284	0.667055	1.05638	0.82533-1.35212	0.00043	0.97519	0.786	18.18025	24	0.79418	18.17926	23	0.74769
GCST90200083	33	0.922296	0.99108	0.82907-1.1848	0.740755	1.02088	0.90323-1.15386	0.268338	1.05480	0.95972-1.15930	0.597454	0.94359	0.76228-1.16802	0.953081	0.99632	0.88196-1.12551	0.01079	0.42521	0.043	48.58365	32	0.03037	47.58142	31	0.02885
GCST90200878	25	0.321785	0.89086	0.71229-1.1142	0.0416104	0.83678	0.70496-0.99325	0.26929	0.93226	0.82318-1.05581	0.320855	0.86415	0.65161-1.14603	0.0606993	0.83575	0.69900-0.99925	0.00748	0.63393	0.147	30.77088	24	0.16050	30.46239	23	0.13658
GCST90200052	35	0.940465	1.00657	0.84882-1.1936	0.517215	0.96900	0.88091-1.06590	0.270236	1.06057	0.95529-1.17745	0.865524	1.02242	0.79250-1.31905	0.704292	0.98300	0.90036-1.07322	0.01109	0.45043	<0.001	79.54233	34	0.00002	78.16067	33	0.00002
GCST90199827	19	0.648465	0.92445	0.66344-1.2881	0.477954	0.93762	0.78480-1.12020	0.270747	0.92822	0.81299-1.05979	0.935809	1.01144	0.76973-1.32906	0.917282	0.98565	0.75313-1.28995	0.00054	0.97937	0.817	13.09409	18	0.78595	13.09340	17	0.72991
GCST90200892	26	0.510214	1.14214	0.77354-1.6864	0.485548	0.93532	0.77509-1.12868	0.271878	1.08211	0.94002-1.24566	0.468747	0.87329	0.60869-1.25291	0.457714	0.86955	0.60471-1.25036	-0.00628	0.77274	0.137	32.56152	25	0.14240	32.44620	24	0.11631
GCST90200002	16	0.759172	0.94804	0.67848-1.3247	0.778993	0.97009	0.78469-1.19929	0.271917	0.91795	0.78792-1.06943	0.980483	1.00519	0.66844-1.51159	0.806191	1.04610	0.73441-1.49009	-0.00490	0.83484	0.507	14.04856	15	0.52185	14.00343	14	0.44946
GCST90200434	29	0.309242	1.16291	0.87413-1.5471	0.796473	1.02323	0.85938-1.21832	0.273179	1.07374	0.94543-1.21946	0.629539	0.91420	0.63750-1.31100	0.566312	0.90372	0.64203-1.27208	-0.01011	0.54454	0.291	32.18419	28	0.26708	31.74140	27	0.24180
GCST90200839	26	0.0312652	0.87721	0.78407-0.9814	0.381089	0.95659	0.86615-1.05647	0.275036	0.96187	0.89702-1.03141	0.722555	0.96893	0.81560-1.15109	0.0922141	0.89942	0.79878-1.01274	0.02814	0.05097	0.505	22.10872	25	0.62946	17.88784	24	0.80842
GCST90200293	22	0.803375	1.04656	0.73493-1.4903	0.225533	0.88542	0.72723-1.07801	0.275855	0.92457	0.80293-1.06464	0.441899	1.15419	0.80639-1.65201	0.22216	0.80308	0.57067-1.13014	-0.02006	0.46233	0.541	20.21404	21	0.50774	19.65242	20	0.47985
GCST90200279	29	0.795842	1.00869	0.94529-1.0764	0.717116	1.01422	0.93963-1.09473	0.275924	0.97110	0.92119-1.02371	0.956325	0.99404	0.80417-1.22874	0.734782	0.98985	0.93369-1.04940	-0.01855	0.05946	0.577	24.93221	28	0.63152	21.06055	27	0.78344
GCST90200805	19	0.92456	1.01417	0.76118-1.3513	0.541943	0.94724	0.79581-1.12749	0.276949	0.93085	0.81805-1.05921	0.391134	0.88704	0.67893-1.15893	0.750076	0.95957	0.74727-1.23219	-0.01112	0.52079	0.893	11.45090	18	0.87425	11.02094	17	0.85547
GCST90199695	16	0.656934	0.91899	0.63804-1.3237	0.886538	0.98453	0.79477-1.21961	0.277776	1.09449	0.92982-1.28831	0.826435	0.95225	0.61961-1.46348	0.706431	0.93567	0.66633-1.31388	0.03263	0.31216	0.107	21.41080	15	0.12421	19.85187	14	0.13488
GCST90200511	17	0.372167	0.83467	0.56793-1.2267	0.455243	0.91535	0.72570-1.15456	0.278717	1.11071	0.91852-1.34312	0.536282	0.90012	0.64951-1.24742	0.476593	0.90012	0.67830-1.19449	0.03470	0.12039	0.095	23.43301	16	0.10264	19.84522	15	0.17795
GCST90200957	20	0.128343	1.14124	0.97012-1.3425	0.250652	1.07592	0.94964-1.21900	0.280141	1.05229	0.95932-1.15426	0.575048	1.05998	0.86771-1.29486	0.298472	1.06714	0.94728-1.20218	-0.01768	0.24913	0.949	10.71708	19	0.93299	9.29866	18	0.95242
GCST90200577	21	0.293362	1.12844	0.90636-1.4049	0.0794082	0.88160	0.76582-1.01490	0.280684	0.94620	0.85576-1.04621	0.188328	0.84443	0.66205-1.07706	0.229629	0.85637	0.67011-1.09439	-0.03362	0.09470	0.378	21.24586	20	0.38279	18.15232	19	0.51229
GCST90200651	29	0.446663	0.94160	0.80824-1.0970	0.0852435	0.92545	0.84729-1.01082	0.280748	0.95176	0.86999-1.04122	0.148418	0.85028	0.68653-1.05308	0.118691	0.92925	0.84983-1.01610	0.00275	0.86469	0.004	54.59679	28	0.00190	54.53701	27	0.00131
GCST90200127	28	0.502666	0.95037	0.82064-1.1006	0.1624	0.91001	0.79724-1.03873	0.280833	0.95275	0.87253-1.04035	0.191782	0.84711	0.66443-1.08002	0.0999591	0.89404	0.78594-1.01701	0.00050	0.96665	0.343	29.59986	27	0.33243	29.59783	26	0.28461
GCST90200125	28	0.419257	1.14071	0.83298-1.5621	0.154384	1.16340	0.94465-1.43280	0.280851	1.09031	0.93176-1.27584	0.901649	1.02877	0.65880-1.60653	0.0681166	1.28825	0.99208-1.67284	-0.00582	0.74619	0.083	37.31002	27	0.08942	37.15709	26	0.07235
GCST90200111	21	0.98046	1.00153	0.88774-1.1299	0.668904	0.97465	0.86644-1.09637	0.280925	0.95432	0.87657-1.03897	0.493922	1.07444	0.87796-1.31490	0.696597	0.97955	0.88425-1.08513	-0.01412	0.28259	0.732	16.73180	20	0.67031	15.50887	19	0.68975
GCST90200018	23	0.709185	0.95428	0.74868-1.2163	0.661194	0.96507	0.82320-1.13139	0.282354	0.94098	0.84218-1.05136	0.720245	1.04636	0.81911-1.33665	0.498428	0.93160	0.76141-1.13984	-0.00265	0.89976	0.803	17.19855	22	0.75231	17.18229	21	0.70000
GCST90199812	19	0.880177	0.98280	0.78703-1.2273	0.726257	0.96844	0.80927-1.15890	0.283531	0.93382	0.82397-1.05831	0.934676	0.98818	0.74648-1.30813	0.806213	0.97792	0.82028-1.16585	-0.00968	0.58869	0.301	22.07742	18	0.22857	21.68983	17	0.19694
GCST90200985	35	0.549287	0.90290	0.64853-1.2570	0.117401	1.13349	0.96894-1.32599	0.283951	1.08696	0.93319-1.26608	0.194731	1.33130	0.87123-2.03432	0.153884	1.31511	0.91011-1.90035	0.02448	0.22524	<0.001	93.09420	34	0.00000	88.97617	33	0.00000
GCST90200177	16	0.756868	1.08584	0.65123-1.8105	0.677619	1.06031	0.80451-1.39744	0.284686	0.88863	0.71578-1.10323	0.848928	0.95279	0.58423-1.55386	0.791475	1.04821	0.74393-1.47696	-0.02861	0.40974	0.101	22.29821	15	0.10022	21.20444	14	0.09651
GCST90200776	24	0.950935	0.99024	0.72707-1.3487	0.743865	1.03216	0.85364-1.24802	0.287039	0.92491	0.80112-1.06785	0.618987	1.09829	0.76279-1.58134	0.730055	1.05311	0.78769-1.40797	-0.00969	0.62798	0.261	27.33306	23	0.24206	27.03625	22	0.20985
GCST90200663	15	0.305379	0.90385	0.75066-1.0883	0.371473	0.92576	0.78167-1.09641	0.287876	0.93750	0.83229-1.05600	0.597576	1.08059	0.81569-1.43152	0.379486	0.93143	0.79896-1.08587	0.00708	0.62363	0.645	12.57915	14	0.55990	12.32651	13	0.50107
GCST90200239	25	0.340459	1.08486	0.92077-1.2782	0.326516	1.06837	0.93615-1.21926	0.28967	1.04996	0.95936-1.14912	0.775622	0.96706	0.77007-1.21443	0.353398	1.06886	0.93116-1.22692	-0.00599	0.64418	0.862	17.07979	24	0.84524	16.86075	23	0.81603
GCST90200462	20	0.361523	0.89507	0.70970-1.1289	0.465111	0.93307	0.77478-1.12369	0.290695	0.93628	0.82864-1.05791	0.888677	0.97486	0.68575-1.38585	0.887247	0.98199	0.76644-1.25818	0.00862	0.66010	0.47	18.12870	19	0.51386	17.92876	18	0.46035
GCST90200234	24	0.783179	1.04638	0.76060-1.4395	0.324729	1.09331	0.91545-1.30573	0.291308	1.09021	0.92862-1.27991	0.511393	1.12538	0.79535-1.59235	0.418607	1.10253	0.87401-1.39079	0.00627	0.77169	0.011	42.46244	23	0.00802	42.29652	22	0.00575
GCST90200833	22	0.223302	0.87964	0.72020-1.0744	0.223483	0.90093	0.76162-1.06572	0.292912	0.94250	0.84401-1.05247	0.523528	0.90401	0.66645-1.22625	0.377852	0.88917	0.68866-1.14807	0.01305	0.42686	0.679	17.26283	21	0.69506	16.60497	20	0.67846
GCST90200345	25	0.376513	0.91514	0.75472-1.1097	0.511687	0.95358	0.82738-1.09904	0.293683	0.94727	0.85618-1.04806	0.887174	1.01692	0.80854-1.27899	0.875638	0.98449	0.81117-1.19485	0.00553	0.68401	0.816	17.62504	24	0.82081	17.45513	23	0.78634
GCST90200938	20	0.599247	1.07363	0.82757-1.3929	0.144867	1.13739	0.95663-1.35230	0.295136	1.07309	0.94033-1.22458	0.465113	1.11427	0.83838-1.48095	0.233844	1.14501	0.92272-1.42086	-0.00008	0.99649	0.349	21.55310	19	0.30706	21.55308	18	0.25243
GCST90200148	31	0.467862	1.14219	0.80150-1.6277	0.285153	0.91577	0.77931-1.07612	0.295937	0.93063	0.81325-1.06495	0.441419	0.89032	0.66495-1.19208	0.437677	0.91433	0.73145-1.14294	-0.02514	0.23080	0.044	44.82351	30	0.04009	42.62157	29	0.04933
GCST90200474	31	0.570205	0.94754	0.78836-1.1389	0.248757	0.91677	0.79090-1.06266	0.296221	0.93968	0.83614-1.05604	0.366054	0.88664	0.68574-1.14640	0.367547	0.92505	0.78286-1.09308	-0.00150	0.90828	0.056	43.11039	30	0.05730	43.09032	29	0.04466
GCST90200624	35	0.805525	0.96348	0.71822-1.2925	0.261761	0.91230	0.77718-1.07092	0.296651	0.94017	0.83731-1.05567	0.533186	0.89759	0.64121-1.25649	0.514944	0.89298	0.63740-1.25102	-0.00274	0.85956	0.306	37.13812	34	0.32643	37.10237	33	0.28542
GCST90200118	31	0.496788	0.91452	0.70903-1.1796	0.511453	1.05358	0.90157-1.23122	0.297309	1.06987	0.94226-1.21477	0.41558	1.13204	0.84330-1.51963	0.368202	1.08241	0.91329-1.28285	0.02149	0.17583	0.018	51.98785	30	0.00764	48.75110	29	0.01227
GCST90199917	35	0.552845	1.06980	0.85808-1.3338	0.103677	1.12836	0.97561-1.30502	0.297747	1.05186	0.95637-1.15688	0.106598	1.27754	0.95630-1.70668	0.0892244	1.20040	0.97826-1.47299	-0.00252	0.86827	0.371	36.00327	34	0.37491	35.97281	33	0.33103
GCST90200361	21	0.424291	0.91084	0.72792-1.1397	0.0693242	0.85981	0.73049-1.01202	0.298127	0.94127	0.83983-1.05495	0.374681	0.87555	0.65720-1.16646	0.181974	0.86793	0.71005-1.06091	0.00544	0.74223	0.561	18.74086	20	0.53872	18.62948	19	0.48083
GCST90200655	16	0.826068	0.94772	0.59231-1.5164	0.279581	0.86586	0.66690-1.12418	0.298923	0.90002	0.73780-1.09792	0.847775	0.95814	0.62380-1.47167	0.244436	0.78939	0.53843-1.15732	-0.00670	0.81562	0.964	6.07376	15	0.97848	6.01730	14	0.96605
GCST90200112	14	0.182199	1.40165	0.87835-2.2367	0.659064	1.05967	0.81913-1.37084	0.299196	1.10821	0.91280-1.34545	0.739454	1.07848	0.69748-1.66762	0.680758	1.09156	0.72584-1.64156	-0.02879	0.30018	0.832	7.96240	13	0.84604	6.78996	12	0.87118
GCST90200277	23	0.133579	1.10221	0.97540-1.2455	0.189703	1.06441	0.96960-1.16850	0.299791	1.04329	0.96298-1.13029	0.545263	1.07290	0.85717-1.34293	0.132479	1.07290	0.98225-1.17192	-0.01468	0.25920	0.383	24.98128	22	0.29797	23.47775	21	0.31904
GCST90200242	30	0.557732	1.06566	0.86374-1.3148	0.723217	0.97455	0.84497-1.12400	0.300235	0.94384	0.84607-1.05291	0.714178	0.96158	0.78130-1.18346	0.751729	0.97460	0.83225-1.14130	-0.01945	0.19739	0.166	36.63779	29	0.15572	34.49019	28	0.18520
GCST90200916	24	0.0988761	1.49373	0.94636-2.3577	0.111362	1.17702	0.96304-1.43855	0.300796	1.09835	0.91953-1.31194	0.359171	1.18854	0.82770-1.70668	0.336152	1.18854	0.84206-1.67759	-0.03392	0.16734	0.019	40.04584	23	0.01519	36.64897	22	0.02584
GCST90200909	27	0.872131	1.02813	0.73594-1.4363	0.561742	0.94843	0.79312-1.13416	0.306396	0.93290	0.81665-1.06571	0.934424	1.01414	0.72815-1.41247	0.763883	0.96289	0.75430-1.22917	-0.01329	0.53925	0.087	36.27486	26	0.08673	35.72118	25	0.07594
GCST90200594	35	0.4932	0.95593	0.84150-1.0859	0.743832	1.01665	0.92079-1.12248	0.306547	0.95992	0.88753-1.03822	0.752019	0.97255	0.81947-1.15422	0.944161	0.99640	0.90145-1.10136	0.00090	0.93510	0.108	45.17614	34	0.09527	45.16692	33	0.07706
GCST90200640	19	0.972735	1.00419	0.79273-1.2721	0.491354	1.05475	0.90619-1.22766	0.307033	1.05870	0.94894-1.18117	0.617021	1.05857	0.85017-1.31807	0.661193	1.04208	0.86930-1.24920	0.00967	0.62561	0.514	17.90726	18	0.46178	17.65087	17	0.41118
GCST90199762	32	0.252728	1.10372	0.93503-1.3029	0.17438	1.10503	0.95672-1.27633	0.310636	1.04993	0.95556-1.15361	0.656205	0.93994	0.71746-1.23141	0.109576	1.14565	0.97453-1.34683	-0.00825	0.47871	0.519	29.37951	31	0.54948	28.86493	30	0.52470
GCST90199838	30	0.144075	1.16814	0.95383-1.4306	0.309422	1.07609	0.93419-1.23954	0.310948	1.05025	0.95522-1.15475	0.318774	1.14581	0.88084-1.49047	0.142568	1.14581	0.95994-1.36766	-0.01639	0.25424	0.49	28.51787	29	0.49037	27.16295	28	0.50939
GCST90200103	20	0.277896	0.88331	0.71075-1.0978	0.166259	0.93169	0.84288-1.02986	0.312304	0.93018	0.80833-1.07039	0.221211	0.90320	0.77137-1.05755	0.0403773	0.90320	0.82487-0.98895	0.01314	0.54418	<0.001	72.21444	19	0.00000	70.71306	18	0.00000
GCST90200220	23	0.150256	0.83665	0.66202-1.0573	0.55031	0.94747	0.79371-1.13101	0.313198	0.93740	0.82674-1.06288	0.987962	0.99762	0.73503-1.35403	0.767597	0.96022	0.73601-1.25274	0.01772	0.27196	0.897	14.37192	22	0.88776	13.09907	21	0.90511
GCST90199724	19	0.546797	1.15619	0.72796-1.8363	0.201738	1.13141	0.93605-1.36754	0.315153	1.08801	0.92290-1.28266	0.385317	1.17676	0.82220-1.68423	0.292865	1.18838	0.86970-1.62382	-0.00759	0.78542	0.12	25.80988	18	0.10419	25.69424	17	0.08021
GCST90199899	26	0.192984	0.81693	0.60770-1.0982	0.186511	0.89180	0.75244-1.05696	0.315551	0.94241	0.83933-1.05815	0.584578	1.08745	0.80830-1.46299	0.421918	0.91005	0.72577-1.14111	0.01730	0.31393	0.698	21.50089	25	0.66437	20.44289	24	0.67133
GCST90200809	18	0.174128	1.18856	0.93679-1.5080	0.868539	1.01505	0.85044-1.21153	0.315989	1.06945	0.93791-1.21943	0.87102	1.02562	0.75920-1.38552	0.78021	1.03450	0.81826-1.30789	-0.01809	0.31331	0.347	19.37090	17	0.30766	18.14191	16	0.31565
GCST90199674	20	0.550825	0.86955	0.55409-1.3646	0.280857	1.14385	0.89595-1.46033	0.316951	1.10214	0.91099-1.33340	0.710308	1.08740	0.70346-1.68088	0.769052	1.07401	0.67138-1.71809	0.02682	0.27099	0.14	26.07641	19	0.12807	24.33292	18	0.14442
GCST90199913	25	0.0171427	0.77468	0.63760-0.9412	0.136191	0.88846	0.76046-1.03800	0.318584	0.94649	0.84954-1.05451	0.532324	0.91750	0.70297-1.19750	0.104546	0.84638	0.69729-1.02735	0.03704	0.02366	0.775	18.38289	24	0.78405	12.51066	23	0.96182
GCST90199925	21	0.826073	0.98776	0.88638-1.1007	0.394796	0.95413	0.85633-1.06311	0.319509	0.96378	0.89624-1.03640	0.924808	0.99123	0.82747-1.18740	0.403456	0.95087	0.84700-1.06748	-0.00758	0.55562	0.657	16.35267	20	0.69452	15.99272	19	0.65776
GCST90200913	22	0.635142	0.97785	0.89269-1.0711	0.511223	0.97038	0.88711-1.06146	0.32038	0.96405	0.89690-1.03624	0.611786	1.06433	0.83959-1.34923	0.505563	0.97114	0.89225-1.05701	-0.00541	0.62184	0.652	19.97842	21	0.52263	19.72743	20	0.47509
GCST90199748	24	0.0178969	0.64919	0.46630-0.9038	0.825364	0.97612	0.78753-1.20987	0.320923	0.92514	0.79336-1.07880	0.67542	1.09273	0.72532-1.64626	0.945095	1.01240	0.71553-1.43245	0.04779	0.02835	0.39	24.71228	23	0.36529	19.20530	22	0.63262
GCST90200562	28	0.884754	1.02017	0.78077-1.3330	0.815638	1.01963	0.86588-1.20068	0.321682	0.94552	0.84636-1.05630	0.83342	1.03353	0.76232-1.40122	0.825531	1.03353	0.77305-1.38177	-0.00897	0.54593	0.667	23.34070	27	0.66658	22.96630	26	0.63485
GCST90200767	20	0.25607	1.14584	0.91271-1.4385	0.065615	1.18900	0.98888-1.42962	0.322401	1.07491	0.93160-1.24027	0.430376	1.14361	0.82511-1.58505	0.0874662	1.18605	0.98513-1.42795	-0.01125	0.48410	0.107	28.01204	19	0.08320	27.23953	18	0.07461
GCST90199988	21	0.4195	1.11695	0.85891-1.4525	0.230022	1.12559	0.92785-1.36547	0.322886	1.06891	0.93661-1.21991	0.303168	1.18079	0.86761-1.60703	0.250819	1.15659	0.90881-1.47194	-0.00733	0.70856	0.832	14.35865	20	0.81186	14.21466	19	0.77104
GCST90199711	21	0.564601	1.14289	0.73128-1.7862	0.426866	1.08415	0.88824-1.32326	0.323014	1.08305	0.92456-1.26870	0.957941	1.01032	0.69308-1.47278	0.929678	0.98526	0.71141-1.36452	-0.00671	0.80272	0.177	25.54105	20	0.18151	25.45506	19	0.14610
GCST90200041	29	0.949002	0.98920	0.71145-1.3754	0.217316	0.89848	0.75796-1.06505	0.323192	0.93214	0.81082-1.07160	0.601607	0.92164	0.68080-1.24767	0.295616	0.90684	0.75757-1.08551	-0.00767	0.69864	0.005	51.71342	28	0.00414	51.42179	27	0.00311
GCST90200863	24	0.985336	1.00280	0.74639-1.3473	0.664989	1.03662	0.88088-1.21991	0.323545	1.06692	0.93816-1.21335	0.758852	0.95637	0.72179-1.26720	0.616413	1.04627	0.87868-1.24582	0.00901	0.65084	0.078	34.07768	23	0.06404	33.75464	22	0.05202
GCST90199948	18	0.84367	0.96285	0.66494-1.3942	0.888881	0.98710	0.82275-1.18429	0.32387	0.92296	0.78707-1.08232	0.959794	0.99182	0.72392-1.35885	0.956263	0.99182	0.74258-1.32471	-0.00607	0.80591	0.064	26.89256	17	0.05966	26.78808	16	0.04390
GCST90200696	26	0.739227	1.02017	0.90824-1.1459	0.624661	0.98107	0.90876-1.05914	0.323997	0.96302	0.89355-1.03790	0.414215	0.89149	0.67978-1.16914	0.563977	0.97843	0.90945-1.05263	-0.02286	0.21946	0.259	32.37190	25	0.14753	30.36065	24	0.17308
GCST90200372	22	0.0893225	0.73747	0.52793-1.0302	0.906017	1.00968	0.86047-1.18476	0.324184	0.93868	0.82771-1.06452	0.880329	1.01989	0.79172-1.31381	0.890813	1.01495	0.82327-1.25125	0.03283	0.14427	0.356	23.83979	21	0.30089	21.37230	20	0.37552
GCST90199752	24	0.275263	0.95906	0.89133-1.0319	0.215696	0.96147	0.90348-1.02318	0.324382	0.96973	0.91223-1.03086	0.174897	1.23342	0.91948-1.65455	0.161724	0.95738	0.90250-1.01561	0.00545	0.58238	0.313	27.90288	23	0.21948	27.51328	22	0.19238
GCST90200194	16	0.294503	1.48122	0.73040-3.0038	0.296626	0.86090	0.64983-1.14053	0.324548	0.88543	0.69505-1.12796	0.503214	0.84863	0.53093-1.35643	0.464068	0.84863	0.55305-1.30217	-0.04903	0.15320	0.032	26.43656	15	0.03368	22.73265	14	0.06476
GCST90199845	18	0.688798	1.11012	0.67193-1.8341	0.476152	0.92138	0.73554-1.15416	0.324606	0.91428	0.76495-1.09276	0.824729	1.04371	0.71887-1.51535	0.982559	0.99623	0.71377-1.39048	-0.02134	0.42885	0.121	23.81103	17	0.12466	22.86921	16	0.11728
GCST90199839	41	0.292829	1.07796	0.93902-1.2375	0.718535	1.02108	0.91157-1.14375	0.325589	0.96035	0.88593-1.04102	0.827545	0.97074	0.74440-1.26589	0.704617	1.02141	0.91616-1.13876	-0.02138	0.05394	0.193	47.91843	40	0.18239	43.51191	39	0.28526
GCST90200150	35	0.58178	0.96749	0.86114-1.0870	0.791633	1.01340	0.91812-1.11856	0.325906	0.96725	0.90507-1.03369	0.606672	0.95882	0.81818-1.12363	0.953496	1.00289	0.91079-1.10431	-0.00005	0.99592	0.671	29.20028	34	0.70194	29.20025	33	0.65689
GCST90200609	25	0.662231	0.94722	0.74501-1.2043	0.888906	1.01247	0.85086-1.20478	0.326816	0.93880	0.82747-1.06511	0.990241	0.99823	0.75427-1.32110	0.973841	1.00387	0.79872-1.26172	-0.00159	0.93245	0.613	21.71944	24	0.59601	21.71210	23	0.53768
GCST90200768	33	0.425912	1.06924	0.90875-1.2581	0.199078	1.08630	0.95737-1.23258	0.327145	1.04605	0.95597-1.14463	0.13593	1.18477	0.95342-1.47225	0.143333	1.10942	0.96869-1.27059	-0.00440	0.75157	0.242	37.99222	32	0.21505	37.86761	31	0.18450
GCST90199646	28	0.629754	1.05791	0.84376-1.3264	0.314215	1.08583	0.92494-1.27472	0.32821	1.06174	0.94159-1.19722	0.525547	0.89629	0.64199-1.25131	0.522066	0.90978	0.68369-1.21065	0.00058	0.97083	0.928	17.02437	27	0.93052	17.02301	26	0.90839
GCST90200965	23	0.122707	0.76952	0.55919-1.0590	0.662025	0.95648	0.78347-1.16769	0.32822	0.93420	0.81505-1.07077	0.994742	0.99891	0.72482-1.37664	0.808949	0.97127	0.76905-1.22667	0.03125	0.20365	0.356	24.20336	22	0.33666	22.36948	21	0.37849
GCST90199846	33	0.673705	0.94994	0.74963-1.2038	0.852417	1.01367	0.87854-1.16960	0.328334	0.94887	0.85409-1.05417	0.0833313	0.76098	0.56403-1.02671	0.637073	1.05214	0.85359-1.29687	-0.00015	0.99177	0.153	40.31471	32	0.14854	40.31457	31	0.12210
GCST90200012	17	0.350795	0.78175	0.47363-1.2903	0.433747	0.90956	0.71738-1.15322	0.328641	0.90588	0.74292-1.10460	0.220942	0.74564	0.47466-1.17132	0.556837	0.89777	0.63124-1.27683	0.01825	0.53819	0.072	25.19728	16	0.06642	24.54779	15	0.05636
GCST90200947	17	0.178096	1.28246	0.90817-1.8110	0.249799	1.09802	0.93637-1.28759	0.329225	1.06366	0.93963-1.20407	0.506673	1.09127	0.84816-1.40406	0.441281	1.08397	0.88737-1.32412	-0.02953	0.27343	0.28	19.25070	16	0.25588	17.72355	15	0.27748
GCST90200532	25	0.270874	0.88136	0.70772-1.0976	0.0544314	0.88385	0.77935-1.00235	0.330433	0.94648	0.84723-1.05735	0.455329	0.91271	0.72091-1.15554	0.0555187	0.87947	0.77607-0.99666	0.01158	0.46668	0.052	37.24189	24	0.04139	36.37541	23	0.03775
GCST90200740	19	0.0719224	0.86867	0.75233-1.0030	0.227942	0.93947	0.84879-1.03984	0.330581	0.95502	0.87045-1.04780	0.792693	0.96781	0.76101-1.23082	0.219462	0.93828	0.85056-1.03504	0.02443	0.11926	0.397	20.98194	18	0.28033	18.11411	17	0.38168
GCST90200935	24	0.168693	0.85887	0.69653-1.0591	0.0975074	0.87698	0.75085-1.02429	0.331096	0.94724	0.84917-1.05665	0.932737	1.01075	0.79057-1.29226	0.251985	0.89370	0.74094-1.07796	0.01597	0.29449	0.582	21.07741	23	0.57636	19.92408	22	0.58779
GCST90200139	32	0.682852	0.97144	0.84650-1.1148	0.660065	1.02394	0.92149-1.13778	0.331696	0.96333	0.89333-1.03881	0.897375	1.01292	0.83469-1.22922	0.815311	1.01292	0.91029-1.12713	-0.00163	0.88673	0.317	34.36050	31	0.30983	34.33687	30	0.26757
GCST90200217	21	0.621885	1.08671	0.78510-1.5042	0.21123	1.11433	0.94039-1.32044	0.332963	1.06197	0.94026-1.19943	0.1754	1.23568	0.91978-1.66008	0.157159	1.23035	0.93321-1.62211	-0.00363	0.88206	0.306	22.56063	20	0.31088	22.53381	19	0.25850
GCST90200134	30	0.899475	1.00753	0.89777-1.1307	0.594604	1.02780	0.92906-1.13704	0.33303	1.03693	0.96352-1.11592	0.470467	1.07754	0.88207-1.31633	0.512253	1.03079	0.94246-1.12742	0.00616	0.52855	0.322	32.04413	29	0.31794	31.58474	28	0.29174
GCST90200791	20	0.715043	1.03936	0.84755-1.2746	0.801962	0.98024	0.83866-1.14571	0.333088	0.94682	0.84762-1.05761	0.169585	0.82407	0.63184-1.07479	0.797248	0.97994	0.84140-1.14130	-0.01628	0.30030	0.636	17.41958	19	0.56147	16.28217	18	0.57286
GCST90199723	15	0.179766	0.76794	0.53310-1.1062	0.645715	0.94393	0.73806-1.20721	0.333964	0.91955	0.77569-1.09010	0.874248	1.03038	0.71605-1.48269	0.771957	0.95922	0.72775-1.26432	0.02389	0.29401	0.672	11.30999	14	0.66153	10.11416	13	0.68457
GCST90200802	23	0.123589	0.86612	0.72663-1.0324	0.189029	0.90102	0.77125-1.05264	0.334007	0.94811	0.85097-1.05635	0.973576	0.99497	0.74061-1.33667	0.160445	0.88187	0.74428-1.04489	0.01653	0.21414	0.501	21.19788	22	0.50854	19.55675	21	0.54947
GCST90200836	23	0.425431	1.16239	0.80867-1.6708	0.661687	0.95541	0.77884-1.17200	0.335333	0.93151	0.80632-1.07615	0.27319	0.78951	0.52282-1.19225	0.396785	1.17781	0.81261-1.70715	-0.02488	0.20646	0.656	18.18275	22	0.69510	16.48325	21	0.74191
GCST90200591	25	0.0893453	0.89862	0.79851-1.0113	0.342102	0.94874	0.85114-1.05753	0.337253	0.95809	0.87786-1.04565	0.614449	0.94860	0.77460-1.16169	0.334141	0.95474	0.87073-1.04685	0.01937	0.13890	0.17	33.23322	24	0.09925	30.15201	23	0.14509
GCST90200399	21	0.492767	1.04294	0.92702-1.1734	0.731731	1.02045	0.90894-1.14563	0.337751	0.95718	0.87524-1.04678	0.119387	0.75207	0.53357-1.06005	0.787723	1.01542	0.90971-1.13342	-0.03109	0.04084	0.416	18.72704	20	0.53963	13.91169	19	0.78881
GCST90200967	35	0.278087	1.13099	0.90876-1.4076	0.0571082	1.16859	0.99530-1.37204	0.3378	1.05368	0.94683-1.17259	0.231661	1.19647	0.89645-1.59690	0.106756	1.18212	0.96985-1.44086	-0.00876	0.47229	0.483	33.45658	34	0.49409	32.92790	33	0.47078
GCST90199791	33	0.654509	0.96211	0.81369-1.1376	0.283612	0.93987	0.83914-1.05269	0.338675	0.95594	0.87166-1.04838	0.209737	0.87832	0.72006-1.07135	0.277361	0.94083	0.84436-1.04832	-0.00119	0.92827	0.035	48.95249	32	0.02805	48.93949	31	0.02134
GCST90200966	13	0.748145	1.07745	0.69110-1.6798	0.4433	1.07319	0.89588-1.28558	0.339989	1.06578	0.93505-1.21479	0.690634	1.06185	0.79577-1.41689	0.734086	1.05065	0.79524-1.38810	-0.00143	0.96079	0.634	10.10098	12	0.60710	10.09845	11	0.52155
GCST90200868	25	0.599682	0.91058	0.64491-1.2857	0.464432	0.93142	0.76998-1.12671	0.340083	0.93455	0.81321-1.07399	0.606935	0.90425	0.61934-1.32021	0.525446	0.90075	0.65543-1.23790	0.00310	0.87326	0.86	17.13930	24	0.84266	17.11328	23	0.80366
GCST90200514	22	0.642523	1.06050	0.83065-1.3540	0.643613	0.95956	0.80562-1.14293	0.340781	1.06267	0.93775-1.20423	0.838755	0.97013	0.72699-1.29458	0.738749	0.96579	0.78926-1.18181	0.00031	0.98485	0.276	24.57522	21	0.26603	24.57477	20	0.21819
GCST90200756	14	0.180062	1.19778	0.93425-1.5357	0.776796	0.97843	0.84149-1.13765	0.341826	1.06681	0.93363-1.21899	0.981018	1.00389	0.73342-1.37411	0.931396	0.99311	0.85097-1.15898	-0.02728	0.30149	0.245	17.35316	13	0.18366	15.81656	12	0.19978
GCST90200502	30	0.292059	0.92048	0.79128-1.0708	0.707773	0.97423	0.84994-1.11671	0.342808	1.04687	0.95234-1.15077	0.451592	0.90466	0.69938-1.17019	0.621643	0.96412	0.83519-1.11295	0.02672	0.04314	0.437	29.83810	29	0.42212	25.35013	28	0.60872
GCST90200890	24	0.966569	1.00633	0.75173-1.3471	0.699986	0.96296	0.79473-1.16679	0.343148	0.92844	0.79632-1.08249	0.327537	0.84048	0.59793-1.18141	0.853036	0.97544	0.75202-1.26525	-0.01284	0.52888	0.069	34.99807	23	0.05204	34.35868	22	0.04515
GCST90200113	17	0.275008	1.20563	0.87240-1.6661	0.354627	1.10626	0.89329-1.36999	0.34549	1.07200	0.92781-1.23860	0.503577	1.14258	0.77999-1.67372	0.479932	1.14258	0.79621-1.63961	-0.01919	0.43876	0.618	13.22375	16	0.65633	12.59101	15	0.63386
GCST90199627	21	0.262707	1.17700	0.89247-1.5523	0.890672	1.01104	0.86448-1.18245	0.345659	1.06464	0.93468-1.21267	0.725102	0.94754	0.70464-1.27415	0.80581	1.02811	0.82662-1.27871	-0.02051	0.42947	0.072	30.21198	20	0.06649	29.20997	19	0.06275
GCST90199907	21	0.763231	1.05217	0.75935-1.4579	0.205582	1.14211	0.92972-1.40304	0.346496	1.08039	0.91974-1.26910	0.176908	1.29336	0.90216-1.85419	0.262494	1.18084	0.89017-1.56642	0.00392	0.85563	0.066	30.00389	20	0.06979	29.95026	19	0.05243
GCST90200404	27	0.336448	0.87199	0.66305-1.1468	0.405967	0.92771	0.77722-1.10733	0.346777	0.93077	0.80156-1.08081	0.735173	0.93917	0.65536-1.34587	0.628138	0.92600	0.68091-1.25930	0.00957	0.58035	0.006	47.51609	26	0.00614	46.92710	25	0.00500
GCST90200136	30	0.623777	0.96087	0.82064-1.1251	0.555037	0.96360	0.85196-1.08987	0.348052	0.95984	0.88109-1.04563	0.57245	0.94682	0.78487-1.14219	0.774175	0.98085	0.86056-1.11796	-0.00018	0.98752	0.849	21.67381	29	0.83344	21.67356	28	0.79618
GCST90200030	17	0.451492	1.11507	0.84600-1.4697	0.301945	1.08164	0.93190-1.25545	0.352135	1.07470	0.92338-1.25081	0.922966	0.98371	0.70881-1.36521	0.329894	1.08256	0.92738-1.26372	-0.00565	0.75530	0.052	28.97254	16	0.02412	28.77922	15	0.01717
GCST90200268	22	0.284155	1.11727	0.91705-1.3612	0.492477	1.04905	0.91498-1.20278	0.352669	1.05500	0.94236-1.18111	0.480233	0.89262	0.65484-1.21675	0.539349	1.04912	0.90243-1.21965	-0.01045	0.49322	0.22	26.65228	21	0.18266	26.01848	20	0.16520
GCST90200908	24	0.505216	1.10277	0.83092-1.4636	0.235539	1.08421	0.94862-1.23918	0.354157	1.06905	0.92823-1.23123	0.294187	1.16015	0.88455-1.52162	0.139105	1.11071	0.97111-1.27037	-0.00613	0.80498	0.001	50.14593	23	0.00088	50.00398	22	0.00059
GCST90200635	19	0.444067	0.89670	0.68264-1.1779	0.324908	1.09355	0.91519-1.30667	0.355406	0.93353	0.80680-1.08015	0.387927	1.16022	0.83478-1.61254	0.448959	1.15021	0.80701-1.63937	0.00832	0.73364	0.007	35.29496	18	0.00868	35.04824	17	0.00613
GCST90199635	27	0.190813	0.89322	0.75766-1.0530	0.668616	0.96880	0.83793-1.12011	0.355449	0.95579	0.86839-1.05199	0.89763	0.98424	0.77444-1.25086	0.656494	0.96447	0.82385-1.12909	0.01470	0.33069	0.804	19.93437	26	0.79466	18.95026	25	0.79950
GCST90200452	26	0.68729	1.02777	0.90088-1.1725	0.0743916	1.10133	0.99054-1.22451	0.357245	1.04146	0.95518-1.13553	0.549501	1.06462	0.86964-1.30333	0.13298	1.08392	0.97911-1.19994	0.00330	0.79360	0.251	30.44696	25	0.20799	30.35842	24	0.17315
GCST90200530	13	0.126564	1.35908	0.94461-1.9554	0.385287	1.11372	0.87333-1.42028	0.358601	1.08630	0.91033-1.29628	0.607826	1.10000	0.77167-1.56805	0.501992	1.13656	0.79100-1.63309	-0.03086	0.19472	0.564	10.90694	12	0.53691	9.00010	11	0.62188
GCST90199799	31	0.647173	0.96019	0.80835-1.1406	0.225714	1.07021	0.95894-1.19440	0.358893	1.03751	0.95902-1.12243	0.354154	1.08385	0.91652-1.28173	0.204295	1.07444	0.96401-1.19752	0.01355	0.32969	0.617	27.71174	30	0.58571	26.72887	29	0.58633
GCST90200379	29	0.354693	0.87283	0.65763-1.1584	0.772482	0.97783	0.83996-1.13833	0.359306	1.06042	0.93541-1.20214	0.435672	0.89817	0.68828-1.17206	0.507753	0.93955	0.78309-1.12727	0.02547	0.14630	0.078	40.28172	28	0.06240	37.19907	27	0.09141
GCST90200095	20	0.906717	1.00326	0.95089-1.0585	0.672476	1.01096	0.96115-1.06335	0.359752	1.02281	0.97461-1.07341	0.901527	0.98779	0.81515-1.19698	0.524005	1.01601	0.96843-1.06593	0.01250	0.16211	0.395	24.27538	19	0.18580	21.71185	18	0.24503
GCST90199754	24	0.945012	1.01362	0.69318-1.4822	0.353131	0.90362	0.72959-1.11916	0.359868	0.93213	0.80193-1.08347	0.701052	0.92631	0.62971-1.36262	0.98535	1.00350	0.69375-1.45156	-0.00982	0.64136	0.336	24.99851	23	0.35036	24.74758	22	0.30930
GCST90200259	22	0.742879	1.06639	0.73015-1.5575	0.876962	1.01412	0.84919-1.21108	0.360203	1.07291	0.92277-1.24749	0.907577	1.01970	0.73642-1.41195	0.743073	0.94837	0.69361-1.29670	0.00072	0.97278	0.083	29.90394	21	0.09394	29.90216	20	0.07145
GCST90199712	16	0.616245	0.90535	0.61899-1.3242	0.762544	1.03409	0.83200-1.28526	0.360597	1.08458	0.91131-1.29080	0.905884	0.97945	0.69826-1.37388	0.962723	0.99345	0.75775-1.30248	0.02728	0.31310	0.247	18.56743	15	0.23401	17.22053	14	0.24462
GCST90200029	23	0.236705	0.88312	0.72304-1.0786	0.702363	0.97211	0.84082-1.12390	0.360612	0.95404	0.86250-1.05530	0.0922239	0.80104	0.62574-1.02546	0.0545711	0.81340	0.66638-0.99286	0.01230	0.39059	0.868	15.05733	22	0.85977	14.28881	21	0.85688
GCST90199643	20	0.895362	0.97961	0.72377-1.3259	0.417633	0.92924	0.77814-1.10969	0.361215	0.93927	0.82107-1.07449	0.392194	0.86857	0.63359-1.19068	0.507124	0.90096	0.66589-1.21902	-0.00553	0.76463	0.922	10.73254	19	0.93251	10.64014	18	0.90900
GCST90200087	26	0.713017	1.00983	0.95911-1.0632	0.53572	1.01635	0.96550-1.06987	0.361471	1.02095	0.97648-1.06745	0.115386	1.21053	0.96222-1.52293	0.431759	1.02022	0.97134-1.07155	0.00834	0.41601	0.771	21.02055	25	0.69146	20.33551	24	0.67755
GCST90199862	22	0.149396	0.86344	0.71265-1.0461	0.662744	0.96243	0.81026-1.14318	0.362001	1.05742	0.93780-1.19230	0.866858	1.02660	0.75810-1.39020	0.98403	1.00211	0.81745-1.22847	0.03704	0.01968	0.28	24.61554	21	0.26420	18.18716	20	0.57508
GCST90200007	22	0.634376	1.07389	0.80412-1.4342	0.780917	1.02703	0.85107-1.23936	0.362393	1.06985	0.92518-1.23714	0.451277	0.88077	0.63690-1.21801	0.637621	0.93223	0.69911-1.24308	-0.00056	0.97654	0.135	28.30454	21	0.13172	28.30329	20	0.10241
GCST90200669	19	0.680079	0.93083	0.66596-1.3011	0.183749	0.86670	0.70187-1.07024	0.362625	0.92723	0.78803-1.09102	0.567597	0.88982	0.60070-1.31811	0.565318	0.91266	0.67220-1.23914	-0.00059	0.97940	0.173	23.56216	18	0.16990	23.56121	17	0.13186
GCST90200602	19	0.775583	1.06125	0.70975-1.5868	0.0947326	0.86440	0.72858-1.02553	0.363446	0.93250	0.80203-1.08419	0.272279	0.82391	0.58924-1.15203	0.286408	0.84891	0.63380-1.13704	-0.01958	0.50481	0.018	32.87472	18	0.01728	32.00077	17	0.01504
GCST90199931	28	0.953256	1.01007	0.72477-1.4077	0.656422	1.04212	0.86891-1.24987	0.363883	1.06157	0.93312-1.20769	0.682177	0.93287	0.67133-1.29631	0.871493	1.02493	0.76269-1.37734	0.00638	0.75255	0.852	19.94968	27	0.83286	19.84815	26	0.79870
GCST90200395	22	0.0368208	1.30381	1.03342-1.6450	0.0696154	1.13904	0.98961-1.31104	0.365163	1.05207	0.94261-1.17424	0.545114	1.08453	0.83742-1.40455	0.294109	1.11379	0.91528-1.35534	-0.04310	0.05739	0.141	28.36773	21	0.13003	23.57532	20	0.26144
GCST90200084	19	0.797506	0.93596	0.56900-1.5396	0.744643	0.96242	0.76429-1.21191	0.365622	1.09747	0.89719-1.34246	0.481791	0.82752	0.49366-1.38718	0.453449	0.83949	0.53661-1.31332	0.02258	0.50095	0.01	35.15974	18	0.00902	34.20823	17	0.00789
GCST90200101	28	0.905609	1.01273	0.82331-1.2457	0.338431	1.07454	0.92746-1.24494	0.365644	1.04784	0.94695-1.15948	0.24453	1.15853	0.90912-1.47637	0.422286	1.08551	0.89110-1.32233	0.00493	0.71453	0.608	24.92859	27	0.57846	24.79184	26	0.53078
GCST90200731	18	0.784304	0.96797	0.76966-1.2174	0.975009	1.00241	0.86229-1.16530	0.36599	0.95365	0.86042-1.05700	0.713476	1.04711	0.82234-1.33332	0.732029	0.96372	0.78268-1.18663	-0.00250	0.88845	0.592	15.03253	17	0.59314	15.01222	16	0.52374
GCST90199906	23	0.230904	0.82071	0.59961-1.1233	0.546295	0.94127	0.77326-1.14579	0.366105	0.93921	0.81977-1.07605	0.740533	0.93376	0.62557-1.39378	0.848638	0.96471	0.66998-1.38911	0.01895	0.36069	0.499	20.92922	22	0.52512	20.05600	21	0.51772
GCST90200297	19	0.801367	1.05383	0.70490-1.5755	0.70383	1.03725	0.85899-1.25252	0.368288	1.06697	0.92645-1.22879	0.640096	1.08152	0.78302-1.49381	0.651993	1.06951	0.80254-1.42529	0.00178	0.94912	0.232	22.17159	18	0.22446	22.16612	17	0.17841
GCST90200140	23	0.384171	0.82775	0.54558-1.2559	0.615797	0.95395	0.79352-1.14681	0.37044	1.07254	0.92015-1.25015	0.362617	0.86597	0.63937-1.17289	0.524095	0.94164	0.78491-1.12967	0.04146	0.20548	0.019	36.98773	22	0.02373	34.20691	21	0.03443
GCST90200881	22	0.691004	1.06097	0.79576-1.4146	0.51249	1.05954	0.89116-1.25972	0.370991	1.05801	0.93505-1.19714	0.954838	1.00854	0.75408-1.34885	0.787118	1.02858	0.84052-1.25871	-0.00037	0.98338	0.891	13.56626	21	0.88750	13.56581	20	0.85181
GCST90200518	28	0.454121	0.92806	0.76551-1.1251	0.695242	0.97577	0.86308-1.10317	0.371028	0.95978	0.87722-1.05011	0.128613	0.82857	0.65497-1.04819	0.137858	0.83638	0.66518-1.05163	0.00550	0.70200	0.716	22.11990	27	0.73126	21.97023	26	0.69032
GCST90200832	21	0.52937	1.11134	0.80462-1.5350	0.779729	0.97923	0.84529-1.13439	0.371172	0.95030	0.84983-1.06264	0.95948	1.00683	0.77673-1.30511	0.955693	1.00683	0.79416-1.27645	-0.02427	0.32399	0.358	22.26623	20	0.32624	21.12623	19	0.32987
GCST90199638	31	0.657897	0.94724	0.74705-1.2011	0.543576	1.04747	0.90188-1.21656	0.371996	1.06481	0.92768-1.22220	0.420297	1.10150	0.87353-1.38895	0.733457	1.02691	0.88261-1.19481	0.02329	0.24668	0.001	61.59102	30	0.00059	58.75871	29	0.00088
GCST90199726	22	0.206076	0.76015	0.50382-1.1469	0.214577	1.13412	0.92969-1.38349	0.37235	1.08029	0.91170-1.28005	0.46902	1.14327	0.80094-1.63191	0.446529	1.14327	0.81515-1.60345	0.03785	0.08372	0.065	31.01842	21	0.07335	26.61010	20	0.14659
GCST90200344	19	0.412521	0.89890	0.70099-1.1527	0.482571	0.93919	0.78832-1.11894	0.372781	0.93749	0.81343-1.08047	0.717666	0.94942	0.71973-1.25241	0.489009	0.93672	0.78133-1.12302	0.00806	0.68812	0.209	24.41948	18	0.14176	24.18229	17	0.11457
GCST90200320	16	0.218231	0.80771	0.58379-1.1175	0.296577	1.11922	0.90587-1.38283	0.373151	1.07550	0.91631-1.26236	0.208299	1.24620	0.89764-1.73011	0.499264	1.11112	0.82457-1.49725	0.04525	0.06681	0.64	13.00790	15	0.60169	9.05836	14	0.82729
GCST90200873	20	0.555409	0.93611	0.75475-1.1611	0.589634	0.94940	0.78615-1.14656	0.374738	0.94709	0.83996-1.06788	0.690858	0.94451	0.71592-1.24608	0.554145	0.94169	0.77446-1.14504	0.00198	0.89973	0.983	9.08483	19	0.97204	9.06850	18	0.95813
GCST90200057	24	0.0643559	0.80108	0.64081-1.0014	0.570501	0.95604	0.81850-1.11669	0.375381	1.06497	0.92660-1.22399	0.830211	0.96971	0.73439-1.28043	0.289068	0.91787	0.78626-1.07152	0.04308	0.00711	0.008	45.58138	23	0.00337	32.55177	22	0.06846
GCST90200336	26	0.710048	1.07001	0.75212-1.5223	0.93506	1.00768	0.83834-1.21122	0.376343	1.06893	0.92217-1.23905	0.418905	1.15179	0.82227-1.61335	0.576702	0.91639	0.67715-1.24017	-0.00013	0.99509	0.038	36.84163	25	0.05976	36.84157	24	0.04538
GCST90199855	31	0.423309	0.95828	0.86461-1.0621	0.11181	0.94041	0.87183-1.01439	0.377098	0.96480	0.89105-1.04466	0.964684	1.00626	0.76503-1.32357	0.112538	0.94313	0.87919-1.01171	0.00233	0.83591	0.108	46.79575	30	0.02605	46.72537	29	0.01985
GCST90200354	21	0.270145	0.79981	0.54399-1.1760	0.294998	1.12287	0.90392-1.39484	0.377195	1.07242	0.91827-1.25245	0.383587	1.17966	0.82014-1.69678	0.334055	1.17177	0.85611-1.60382	0.03522	0.12045	0.453	20.44083	20	0.43068	17.79742	19	0.53601
GCST90200838	23	0.450858	0.84350	0.54643-1.3021	0.781813	1.03022	0.83451-1.27182	0.377432	1.06910	0.92168-1.24009	0.807627	0.95484	0.66115-1.37898	0.819196	0.96342	0.70254-1.32116	0.02685	0.26774	0.749	17.22086	22	0.75106	15.92473	21	0.77387
GCST90200827	24	0.146697	0.77702	0.55934-1.0794	0.940383	1.00746	0.82923-1.22398	0.377736	0.93083	0.79379-1.09154	0.569638	1.12767	0.74969-1.69622	0.85125	1.04290	0.67565-1.60976	0.02344	0.23273	0.039	35.90673	23	0.04217	33.60636	22	0.05384
GCST90200401	29	0.581434	1.08715	0.81064-1.4580	0.566683	1.05602	0.87637-1.27251	0.378144	1.06037	0.93077-1.20801	0.177244	0.75199	0.50225-1.12590	0.154668	1.26253	0.92381-1.72545	-0.00313	0.85327	0.229	32.81696	28	0.24255	32.77464	27	0.20461
GCST90199670	17	0.492145	1.11522	0.82324-1.5108	0.61787	1.05371	0.85794-1.29415	0.3794	1.06452	0.92599-1.22378	0.894549	0.97767	0.70377-1.35816	0.628684	1.07008	0.81747-1.40077	-0.00660	0.73990	0.61	14.16497	16	0.58643	14.05059	15	0.52170
GCST90199664	26	0.265336	1.13250	0.91447-1.4025	0.336311	1.08873	0.91550-1.29473	0.379885	1.05139	0.94013-1.17581	0.925266	0.98605	0.73740-1.31855	0.604184	1.05577	0.86215-1.29287	-0.01041	0.43109	0.491	24.89796	25	0.46810	24.24998	24	0.44738
GCST90199924	30	0.0719785	1.18391	0.99190-1.4131	0.424474	1.05830	0.92091-1.21620	0.380266	1.04393	0.94833-1.14916	0.453594	1.09844	0.86212-1.39956	0.54748	1.05390	0.88998-1.24802	-0.02194	0.11206	0.119	38.63159	29	0.10892	35.24347	28	0.16289
GCST90200000	21	0.154146	1.14760	0.95683-1.3764	0.941277	0.99484	0.86698-1.14157	0.380444	1.04725	0.94460-1.16105	0.732975	0.96363	0.78122-1.18864	0.943523	1.00615	0.85093-1.18969	-0.02130	0.24783	0.176	25.93377	20	0.16801	24.12850	19	0.19127
GCST90200299	26	0.380691	1.11381	0.87918-1.4111	0.569533	1.04960	0.88833-1.24014	0.381054	1.05540	0.93545-1.19074	0.938867	1.01128	0.76139-1.34318	0.482857	1.06380	0.89733-1.26116	-0.00829	0.60672	0.129	33.48434	25	0.11940	33.10899	24	0.10179
GCST90200937	20	0.0297644	1.53445	1.07528-2.1897	0.134641	1.19365	0.94658-1.50521	0.383796	1.08451	0.90353-1.30174	0.316748	1.24401	0.82049-1.88616	0.313004	1.21306	0.84189-1.74788	-0.04936	0.04391	0.116	26.58275	19	0.11475	21.08316	18	0.27524
GCST90200490	24	0.624336	1.04472	0.87908-1.2416	0.81038	1.01803	0.87978-1.17799	0.38498	0.94783	0.83991-1.06962	0.70083	1.05103	0.81793-1.35056	0.779978	1.01968	0.89077-1.16725	-0.02096	0.14528	0.091	34.56397	23	0.05743	31.31820	22	0.08979
GCST90200356	16	0.666968	0.90693	0.58667-1.4020	0.888653	1.01647	0.80867-1.27767	0.385054	1.07884	0.90906-1.28033	0.720777	0.93119	0.63450-1.36662	0.736316	0.93496	0.63669-1.37297	0.01967	0.40996	0.873	9.58092	15	0.84524	8.85947	14	0.83995
GCST90200116	30	0.0777099	1.24996	0.98445-1.5871	0.457319	1.05795	0.91190-1.22740	0.385734	1.04802	0.94263-1.16519	0.900085	0.97990	0.71566-1.34170	0.163105	1.17082	0.94338-1.45309	-0.02292	0.11994	0.354	30.85760	29	0.37217	28.26093	28	0.45069
GCST90200272	17	0.390797	0.83787	0.56596-1.2404	0.843546	1.02420	0.80773-1.29868	0.385912	1.07526	0.91259-1.26694	0.68933	1.08800	0.72491-1.63295	0.816127	1.04744	0.71325-1.53821	0.03121	0.19027	0.527	15.24072	16	0.50708	13.35863	15	0.57462
GCST90200606	20	0.248374	0.94414	0.85907-1.0376	0.59214	0.97515	0.88938-1.06919	0.387123	0.96959	0.90404-1.03989	0.222553	0.86045	0.68120-1.08687	0.525739	0.97268	0.89434-1.05789	0.00940	0.41814	0.59	18.92492	19	0.46166	18.22946	18	0.44064
GCST90200465	21	0.817455	0.98209	0.84412-1.1426	0.578941	0.96882	0.86626-1.08352	0.388988	0.96036	0.87591-1.05294	0.294021	0.88395	0.70630-1.10628	0.372766	0.95252	0.85795-1.05752	-0.00521	0.71561	0.405	22.51462	20	0.31325	22.35372	19	0.26701
GCST90200463	24	0.909759	1.01642	0.76935-1.3428	0.315451	0.91547	0.77048-1.08776	0.3893	0.94909	0.84263-1.06899	0.924857	0.98654	0.74671-1.30340	0.403943	0.91805	0.75382-1.11806	-0.00998	0.59770	0.473	23.46849	23	0.43371	23.16657	22	0.39238
GCST90200106	25	0.677243	1.04672	0.84651-1.2943	0.946149	0.99448	0.84679-1.16791	0.391943	0.95094	0.84750-1.06701	0.967095	1.00584	0.76491-1.32266	0.992961	1.00100	0.80266-1.24837	-0.01408	0.30298	0.362	26.35501	24	0.33540	25.14145	23	0.34303
GCST90200115	28	0.800454	1.03471	0.79631-1.3445	0.0568353	1.16244	0.99563-1.35719	0.392521	1.05235	0.93619-1.18291	0.179649	1.26751	0.90463-1.77596	0.0663302	1.28529	0.99393-1.66206	0.00255	0.88815	0.08	37.32872	27	0.08909	37.29978	26	0.07023
GCST90200031	20	0.671428	0.95497	0.77454-1.1774	0.909935	0.99281	0.87606-1.12511	0.395578	0.95199	0.84984-1.06642	0.550434	0.92054	0.70487-1.20219	0.84891	0.98729	0.86711-1.12413	-0.00063	0.97228	0.124	27.42549	19	0.09513	27.42360	18	0.07139
GCST90200600	17	0.224465	0.76150	0.49960-1.1607	0.783385	1.03171	0.82584-1.28890	0.396937	0.93426	0.79825-1.09345	0.554471	1.13327	0.75501-1.70103	0.563881	1.13327	0.74753-1.71805	0.02330	0.32165	0.565	14.49587	16	0.56182	13.44544	15	0.56793
GCST90200722	27	0.671164	1.05944	0.81408-1.3788	0.257555	0.91205	0.77768-1.06963	0.398247	0.95068	0.84542-1.06905	0.387569	0.86450	0.62479-1.19619	0.223763	0.84498	0.64834-1.10126	-0.01405	0.37621	0.195	31.93797	26	0.19518	30.93360	25	0.19123
GCST90200307	29	0.49334	0.93036	0.75887-1.1406	0.101812	0.87789	0.75108-1.02611	0.398565	0.95494	0.85799-1.06284	0.35694	0.87931	0.67183-1.15087	0.215717	0.89480	0.75340-1.06274	0.00440	0.76904	0.467	27.92255	28	0.46856	27.83187	27	0.41968
GCST90200122	18	0.305833	0.85466	0.63887-1.1433	0.341664	0.92907	0.79833-1.08121	0.398744	0.94754	0.83607-1.07387	0.399534	0.90048	0.70993-1.14218	0.389147	0.90445	0.72386-1.13009	0.01862	0.45144	0.146	23.95322	17	0.12071	23.09330	16	0.11126
GCST90199991	25	0.349653	1.17705	0.84228-1.6449	0.655132	1.04324	0.86639-1.25618	0.399014	0.93609	0.80289-1.09138	0.715523	1.06222	0.77072-1.46395	0.621303	1.07338	0.81342-1.41641	-0.02821	0.14726	0.095	34.37810	24	0.07817	31.31533	23	0.11524
GCST90200304	21	0.61252	0.92764	0.69700-1.2346	0.513502	1.05730	0.89456-1.24965	0.399551	1.05442	0.93212-1.19276	0.749006	1.04332	0.80750-1.34801	0.766372	1.03990	0.80617-1.34138	0.01610	0.34257	0.957	11.20832	20	0.94064	10.26073	19	0.94622
GCST90200668	16	0.47468	1.16232	0.77811-1.7362	0.672706	0.95454	0.76919-1.18454	0.399906	1.07950	0.90338-1.28994	0.505055	0.88121	0.61300-1.26677	0.645834	0.91472	0.63021-1.32766	-0.01073	0.69099	0.057	22.80627	15	0.08834	22.54108	14	0.06816
GCST90199972	19	0.830426	0.94151	0.54693-1.6208	0.843618	0.97385	0.74840-1.26721	0.400862	0.90254	0.71049-1.14649	0.328247	1.28279	0.78924-2.08497	0.757605	1.06887	0.70471-1.62121	-0.00582	0.86616	0.007	39.02128	18	0.00283	38.95419	17	0.00181
GCST90199994	16	0.743028	0.93738	0.64169-1.3693	0.677686	1.04607	0.84589-1.29362	0.401777	1.07256	0.91055-1.26340	0.807704	0.95681	0.67473-1.35683	0.398244	1.14820	0.84088-1.56785	0.01817	0.45265	0.977	6.44344	15	0.97130	5.84665	14	0.97021
GCST90201005	23	0.0842276	1.33730	0.97663-1.8312	0.856161	1.01787	0.84049-1.23268	0.402713	0.93456	0.79757-1.09509	0.516893	1.16431	0.74045-1.83081	0.540539	1.13234	0.76525-1.67552	-0.05802	0.02050	0.009	39.88917	22	0.01114	30.70456	21	0.07872
GCST90199756	36	0.838568	0.97505	0.76604-1.2411	0.732895	1.02745	0.87946-1.20035	0.403608	1.04916	0.93741-1.17423	0.649745	1.07049	0.79983-1.43274	0.713991	1.04739	0.81930-1.33898	0.01032	0.50456	0.315	39.22612	35	0.28599	38.70818	34	0.26546
GCST90200717	22	0.404956	1.09573	0.88764-1.3526	0.586881	1.04182	0.89870-1.20772	0.403777	1.04411	0.94350-1.15544	0.755815	0.96260	0.75942-1.22015	0.988531	1.00141	0.82851-1.21039	-0.01087	0.61211	0.437	21.77201	21	0.41275	21.48693	20	0.36899
GCST90200292	26	0.669183	0.92824	0.66241-1.3007	0.199244	1.13428	0.93578-1.37488	0.40448	1.07859	0.90284-1.28855	0.409775	1.19152	0.79101-1.79480	0.243273	1.22181	0.87965-1.69707	0.02289	0.31521	<0.001	54.28571	25	0.00061	52.00547	24	0.00078
GCST90199782	26	0.550786	1.08158	0.83896-1.3944	0.216376	0.89926	0.75993-1.06414	0.405148	0.94673	0.83223-1.07697	0.309876	0.86433	0.65607-1.13871	0.282218	0.89077	0.72473-1.09484	-0.01695	0.24603	0.214	30.33595	25	0.21196	28.64810	24	0.23366
GCST90200396	20	0.672282	0.94044	0.71083-1.2442	0.207989	0.89199	0.74660-1.06569	0.405239	0.94776	0.83527-1.07540	0.913513	1.01755	0.74642-1.38717	0.47091	0.90597	0.69641-1.17860	0.00120	0.95212	0.588	17.19670	19	0.57654	17.19300	18	0.50988
GCST90200072	25	0.906451	0.98760	0.80391-1.2133	0.73613	0.97155	0.82141-1.14914	0.406006	1.04915	0.93688-1.17488	0.960256	1.00734	0.75789-1.33888	0.842194	0.97824	0.78958-1.21198	0.01013	0.49743	0.556	23.03882	24	0.51751	22.56345	23	0.48649
GCST90199825	23	0.341525	0.89568	0.71746-1.1182	0.226132	1.11429	0.93517-1.32772	0.406319	1.05154	0.93392-1.18399	0.190839	1.29144	0.89079-1.87230	0.0994861	1.26403	0.96782-1.65089	0.02342	0.10836	0.652	18.39218	22	0.68250	15.57980	21	0.79278
GCST90200319	24	0.0910297	0.85452	0.71781-1.0173	0.0308639	0.88646	0.79458-0.98896	0.406666	0.95443	0.85487-1.06559	0.111165	0.81715	0.64350-1.03766	0.0295329	0.87837	0.78723-0.98005	0.02263	0.13006	0.065	37.64556	23	0.02779	33.84093	22	0.05098
GCST90200315	22	0.214381	0.88465	0.73352-1.0669	0.388662	0.92961	0.78747-1.09742	0.406815	0.95174	0.84675-1.06974	0.731655	0.95535	0.73839-1.23607	0.450763	0.93680	0.79310-1.10653	0.01744	0.33914	0.268	25.65348	21	0.21997	24.47971	20	0.22207
GCST90200734	18	0.109028	1.41105	0.94807-2.1001	0.885063	0.98503	0.80279-1.20863	0.407137	1.06538	0.91721-1.23749	0.557742	0.90149	0.64170-1.26645	0.576479	0.90873	0.65370-1.26326	-0.03017	0.15436	0.785	12.53781	17	0.76653	10.30260	16	0.85036
GCST90200161	22	0.390088	0.95921	0.87410-1.0526	0.387721	0.96618	0.89361-1.04464	0.410097	0.96730	0.89373-1.04693	0.923606	1.01499	0.75162-1.37063	0.388895	0.96931	0.90429-1.03901	0.00500	0.72340	0.153	37.34552	21	0.01536	37.10649	20	0.01136
GCST90200381	19	0.596055	0.91088	0.64921-1.2780	0.297574	0.89195	0.71929-1.10606	0.410306	0.92884	0.77916-1.10728	0.200844	0.79083	0.55929-1.11822	0.202602	0.84173	0.65203-1.08663	0.00304	0.89527	0.116	25.82992	18	0.10371	25.80282	17	0.07813
GCST90200263	27	0.703306	0.94348	0.70175-1.2685	0.723034	1.03193	0.86728-1.22783	0.412338	0.94997	0.84026-1.07400	0.310203	1.20908	0.84393-1.73222	0.368525	1.17020	0.83573-1.63852	0.00092	0.96045	0.334	28.71952	26	0.32399	28.71664	25	0.27593
GCST90200252	20	0.65814	0.94697	0.74689-1.2007	0.525629	0.94179	0.78258-1.13340	0.414879	0.94835	0.83483-1.07730	0.357325	1.15998	0.85221-1.57891	0.851391	0.97864	0.78317-1.22290	0.00024	0.98883	0.602	17.42466	19	0.56112	17.42446	18	0.49413
GCST90200186	26	0.01555	1.68223	1.13733-2.4882	0.901104	0.98899	0.83059-1.17761	0.414907	0.92881	0.77772-1.10925	0.507093	1.12352	0.80036-1.57715	0.960467	1.00701	0.76621-1.32348	-0.07643	0.00362	<0.001	62.80756	25	0.00004	43.81870	24	0.00801
GCST90200707	23	0.759552	0.98312	0.88284-1.0948	0.656583	0.98135	0.90319-1.06627	0.414933	0.96986	0.90106-1.04391	0.178079	0.83782	0.65295-1.07503	0.607496	0.97809	0.89988-1.06309	-0.00305	0.73318	0.521	22.87780	22	0.40866	22.74851	21	0.35753
GCST90199713	24	0.347456	0.86274	0.63824-1.1662	0.177194	0.87670	0.72418-1.06135	0.415171	0.94254	0.81749-1.08672	0.267975	0.81958	0.58130-1.15553	0.267483	0.84334	0.62860-1.13143	0.01256	0.51925	0.212	28.63991	23	0.19255	28.09205	22	0.17265
GCST90200312	22	0.567102	1.10578	0.78813-1.5514	0.173194	0.87113	0.71427-1.06244	0.415902	0.94421	0.82224-1.08426	0.275619	0.82849	0.59596-1.15176	0.325182	0.84017	0.59872-1.17899	-0.01929	0.32852	0.394	21.73612	21	0.41485	20.69797	20	0.41510
GCST90201003	25	0.356813	1.16408	0.84811-1.5978	0.879974	1.01443	0.84228-1.22177	0.417515	0.94136	0.81341-1.08944	0.853269	0.97410	0.73980-1.28261	0.698245	1.05005	0.82275-1.34014	-0.02861	0.15451	0.146	31.35967	24	0.14368	28.65894	23	0.19188
GCST90199888	33	0.430568	1.06711	0.90987-1.2515	0.540665	1.04180	0.91371-1.18786	0.417719	1.03857	0.94773-1.13813	0.843568	1.02220	0.82333-1.26912	0.353772	1.07103	0.92838-1.23559	-0.00504	0.68610	0.47	31.42729	32	0.49539	31.25945	31	0.45319
GCST90199690	15	0.293091	1.22242	0.85349-1.7508	0.719918	1.04303	0.82849-1.31313	0.41842	0.93340	0.78988-1.10299	0.992795	0.99832	0.69688-1.43014	0.791151	1.04155	0.77498-1.39982	-0.03803	0.12040	0.515	13.50179	14	0.48745	10.73915	13	0.63266
GCST90200851	23	0.371808	0.89799	0.71270-1.1314	0.738119	1.02721	0.87763-1.20228	0.41883	1.05240	0.92984-1.19112	0.6148	1.08410	0.79509-1.47816	0.64188	1.03918	0.88576-1.21918	0.02820	0.13042	0.31	26.25325	22	0.24097	23.48274	21	0.31879
GCST90199966	18	0.954003	0.99526	0.84914-1.1665	0.905853	0.99096	0.85258-1.15181	0.420549	1.04743	0.93574-1.17245	0.992871	1.00131	0.75526-1.32751	0.831218	0.98470	0.85636-1.13227	0.01015	0.38373	0.746	12.50034	17	0.76894	11.69821	16	0.76448
GCST90199979	34	0.118536	1.19764	0.96076-1.4929	0.0939827	1.14976	0.97651-1.35375	0.422068	1.04829	0.93429-1.17620	0.696812	0.93410	0.66490-1.31230	0.184907	1.17946	0.92881-1.49775	-0.01907	0.17645	0.334	36.30189	33	0.31734	34.25640	32	0.35992
GCST90200025	24	0.294852	1.08843	0.93236-1.2706	0.361498	1.06872	0.92654-1.23273	0.423016	1.03731	0.94840-1.13455	0.935473	0.98989	0.77609-1.26259	0.472966	1.05528	0.91327-1.21936	-0.01096	0.46068	0.441	24.32509	23	0.38599	23.71726	22	0.36222
GCST90200737	21	0.433095	1.09573	0.87607-1.3705	0.300247	1.07608	0.93669-1.23621	0.423159	1.04266	0.94133-1.15490	0.445624	1.10760	0.85621-1.43280	0.402925	1.10474	0.87910-1.38831	-0.00864	0.63049	0.8	15.00458	20	0.77615	14.76553	19	0.73738
GCST90200661	24	0.821492	0.96669	0.72279-1.2929	0.721493	1.03020	0.87475-1.21327	0.423338	0.94861	0.83367-1.07939	0.625345	1.08276	0.79028-1.48349	0.788641	1.02335	0.86611-1.20915	-0.00286	0.88769	0.073	33.58078	23	0.07147	33.54964	22	0.05455
GCST90200815	25	0.78072	1.01862	0.89589-1.1582	0.80127	1.01482	0.90498-1.13799	0.423451	1.03185	0.95560-1.11418	0.835026	0.97683	0.78534-1.21502	0.598549	0.95639	0.81188-1.12661	0.00335	0.80593	0.241	27.45771	24	0.28357	27.38417	23	0.23997
GCST90200011	24	0.626569	1.09054	0.77291-1.5387	0.711993	1.03708	0.85479-1.25824	0.424053	1.05941	0.91962-1.22046	0.728874	1.06170	0.75989-1.48340	0.685524	1.06705	0.78251-1.45505	-0.00346	0.85813	0.823	16.32809	23	0.84087	16.29538	22	0.80096
GCST90200782	23	0.781195	0.95400	0.68716-1.3244	0.94451	1.00713	0.82445-1.23029	0.425982	1.06179	0.91607-1.23069	0.181306	1.27304	0.90362-1.79347	0.874922	1.02134	0.78759-1.32448	0.01409	0.48057	0.182	29.01624	22	0.14440	28.32068	21	0.13129
GCST90200172	25	0.230947	0.87463	0.70658-1.0827	0.712883	0.96802	0.81414-1.15098	0.426461	0.95525	0.85332-1.06935	0.766692	0.95160	0.68823-1.31575	0.86023	1.02230	0.80189-1.30329	0.01429	0.34986	0.557	21.72167	24	0.59588	20.81099	23	0.59263
GCST90200819	18	0.750049	1.05965	0.74644-1.5043	0.486533	0.93450	0.77216-1.13097	0.427678	0.93984	0.80625-1.09557	0.389484	0.86216	0.62034-1.19824	0.760184	0.95082	0.69138-1.30762	-0.01752	0.46623	0.821	11.87958	17	0.80737	11.32240	16	0.78916
GCST90199628	28	0.816917	0.97058	0.75572-1.2465	0.40247	1.08266	0.89897-1.30388	0.428092	1.05068	0.92976-1.18732	0.604027	1.07798	0.81434-1.42699	0.51808	1.07798	0.86101-1.34964	0.01089	0.48291	0.936	17.26312	27	0.92443	16.75642	26	0.91626
GCST90199764	18	0.939047	1.01463	0.70327-1.4639	0.834857	1.02471	0.81456-1.28909	0.428917	1.06808	0.90726-1.25740	0.680822	0.91290	0.59575-1.39888	0.643513	0.90701	0.60434-1.36126	0.00705	0.76314	0.777	12.06303	17	0.79631	11.96905	16	0.74611
GCST90200917	23	0.130431	0.81538	0.63239-1.0513	0.408488	0.92872	0.77935-1.10672	0.430442	0.94998	0.83620-1.07924	0.556304	0.91375	0.67969-1.22840	0.441523	0.91839	0.74229-1.13627	0.02280	0.19013	0.439	22.91437	22	0.40658	21.07452	21	0.45440
GCST90200951	18	0.725533	1.06719	0.74700-1.5246	0.365706	1.10105	0.89376-1.35642	0.431156	1.06264	0.91346-1.23617	0.483655	1.13406	0.80370-1.60021	0.562952	1.09325	0.81300-1.47010	-0.00048	0.97963	0.678	14.33914	17	0.64297	14.33847	16	0.57351
GCST90200630	27	0.97867	1.00256	0.83287-1.2068	0.379903	1.06212	0.92843-1.21506	0.431165	1.04317	0.93897-1.15893	0.574667	1.06548	0.85616-1.32599	0.35978	1.06548	0.93246-1.21748	0.00723	0.61220	0.098	36.83318	26	0.07738	36.44895	25	0.06506
GCST90199865	28	0.586917	1.07795	0.82502-1.4084	0.557035	0.95356	0.81362-1.11757	0.433051	0.95547	0.85263-1.07072	0.679014	0.94385	0.71998-1.23733	0.641364	0.94925	0.76432-1.17893	-0.01430	0.33748	0.381	29.56224	27	0.33418	28.51496	26	0.33359
GCST90200359	26	0.236446	1.20004	0.89406-1.6107	0.76565	0.97326	0.81437-1.16315	0.433382	1.05131	0.92761-1.19151	0.822308	0.96422	0.70391-1.32079	0.756993	0.95525	0.71702-1.27261	-0.01561	0.33999	0.497	24.32080	25	0.50090	23.37302	24	0.49788
GCST90199739	17	0.658069	1.07111	0.79494-1.4432	0.637248	0.95610	0.79335-1.15224	0.433827	0.94480	0.81957-1.08917	0.809607	0.96061	0.69649-1.32491	0.824259	0.96810	0.73062-1.28278	-0.01989	0.36294	0.983	6.60551	16	0.98014	5.72503	15	0.98401
GCST90200166	28	0.386913	0.96268	0.88449-1.0478	0.408498	0.96630	0.89085-1.04813	0.434593	0.97620	0.91896-1.03700	0.953855	1.00434	0.86853-1.16138	0.206198	0.95481	0.89029-1.02401	0.00550	0.64391	0.346	30.44883	27	0.29437	30.19482	26	0.25962
GCST90199804	26	0.360427	1.16631	0.84404-1.6116	0.492722	0.93659	0.77672-1.12937	0.434804	0.94394	0.81670-1.09100	0.474974	0.87027	0.59784-1.26683	0.508323	0.90414	0.67361-1.21356	-0.02838	0.16656	0.144	32.98114	25	0.13154	30.40278	24	0.17176
GCST90200596	26	0.429403	0.89674	0.68747-1.1697	0.0929651	0.87465	0.74812-1.02258	0.436425	0.95666	0.85563-1.06960	0.379884	0.87266	0.64737-1.17637	0.3483	0.87266	0.66001-1.15383	0.01085	0.60401	0.74	20.00964	25	0.74632	19.73342	24	0.71183
GCST90200738	23	0.441373	1.08132	0.88951-1.3145	0.309184	1.06632	0.94219-1.20679	0.436468	1.03574	0.94807-1.13151	0.749654	0.96670	0.78720-1.18714	0.272146	1.10435	0.92917-1.31255	-0.00733	0.63279	0.77	16.42851	22	0.79406	16.19341	21	0.75869
GCST90200522	19	0.689575	1.07351	0.76243-1.5115	0.212314	0.86708	0.69299-1.08492	0.437993	0.93647	0.79334-1.10543	0.534024	0.88980	0.62021-1.27657	0.21648	0.82905	0.62229-1.10450	-0.02701	0.38280	0.242	21.54832	18	0.25266	20.57676	17	0.24580
GCST90199938	27	0.0990605	1.16923	0.97772-1.3982	0.322179	1.09459	0.91525-1.30908	0.439931	1.04491	0.93468-1.16813	0.977699	1.00456	0.73220-1.37824	0.260259	1.11011	0.92919-1.32626	-0.02144	0.12860	0.41	26.18375	26	0.45304	23.71363	25	0.53597
GCST90200622	21	0.423308	1.19905	0.77627-1.8521	0.4309	1.07988	0.89192-1.30744	0.441391	1.06048	0.91321-1.23151	0.714154	1.06340	0.76886-1.47078	0.660807	1.07053	0.79314-1.44494	-0.01506	0.56155	0.355	22.71171	20	0.30317	22.30188	19	0.26949
GCST90200922	16	0.312332	1.16101	0.87820-1.5349	0.452175	1.08771	0.87361-1.35428	0.442621	1.05791	0.91630-1.22141	0.351687	1.18236	0.84024-1.66377	0.437282	1.10774	0.86159-1.42423	-0.01308	0.45896	0.578	13.50776	15	0.56314	12.92778	14	0.53222
GCST90200764	29	0.14703	0.83170	0.65298-1.0593	0.978131	0.99767	0.84423-1.17899	0.442735	0.94936	0.83138-1.08408	0.899128	1.02280	0.72403-1.44486	0.932151	1.01239	0.76441-1.34081	0.02559	0.21281	0.007	48.21228	28	0.01017	45.47013	27	0.01450
GCST90200574	21	0.120595	1.28079	0.95029-1.7262	0.632897	1.04521	0.87178-1.25314	0.444649	1.05395	0.92110-1.20596	0.964555	1.00650	0.75894-1.33482	0.920528	1.01230	0.79851-1.28334	-0.02770	0.17003	0.437	20.97107	20	0.39884	18.93701	19	0.46088
GCST90200010	22	0.381343	1.19393	0.80990-1.7600	0.895754	1.01280	0.83731-1.22507	0.444794	1.07074	0.89856-1.27591	0.833266	0.96451	0.69180-1.34472	0.554577	0.91679	0.69043-1.21735	-0.01550	0.54298	0.007	42.14766	21	0.00403	41.35566	20	0.00335
GCST90200032	17	0.663974	0.92610	0.65949-1.3005	0.991657	0.99884	0.80377-1.24126	0.44493	0.94267	0.81015-1.09686	0.899533	1.02268	0.72594-1.44072	0.70516	1.05586	0.80073-1.39228	0.00248	0.90976	0.438	16.19610	16	0.43936	16.18176	15	0.37008
GCST90199730	22	0.651676	0.92631	0.66771-1.2851	0.582834	0.95077	0.79404-1.13844	0.447543	0.94956	0.83083-1.08525	0.930743	0.98659	0.73019-1.33300	0.799836	0.96378	0.72723-1.27726	0.00336	0.87251	0.948	11.72940	21	0.94664	11.70298	20	0.92592
GCST90199654	33	0.589384	0.92996	0.71636-1.2072	0.072046	0.86120	0.73180-1.01348	0.447805	0.95543	0.84932-1.07480	0.22345	0.80800	0.57707-1.13132	0.102214	0.80266	0.62133-1.03693	0.00358	0.82092	0.195	38.75876	32	0.19110	38.69371	31	0.16122
GCST90200886	28	0.503981	1.11120	0.81911-1.5074	0.725755	1.03368	0.85902-1.24385	0.44787	1.05911	0.91312-1.22845	0.767784	0.94882	0.67181-1.34004	0.769938	0.93626	0.60482-1.44933	-0.00734	0.72549	0.012	43.75415	27	0.02192	43.54315	26	0.01692
GCST90200023	16	0.925503	0.98008	0.64763-1.4832	0.461586	0.92033	0.73783-1.14798	0.44822	1.06576	0.90401-1.25645	0.453751	0.84959	0.56080-1.28709	0.453813	0.86564	0.59928-1.25039	0.01121	0.67062	0.316	17.60491	15	0.28401	17.37078	14	0.23696
GCST90199814	20	0.658598	1.05668	0.83079-1.3440	0.284433	1.08263	0.93615-1.25202	0.449021	1.04757	0.92881-1.18151	0.638492	1.06509	0.82216-1.37982	0.329076	1.08882	0.92182-1.28608	-0.00218	0.93539	0.066	30.57655	19	0.04490	30.56507	18	0.03230
GCST90200919	28	0.371632	0.88379	0.67715-1.1535	0.587529	1.04922	0.88199-1.24817	0.449474	1.04651	0.93021-1.17734	0.16898	1.27401	0.91059-1.78246	0.252591	1.19419	0.88686-1.60802	0.02430	0.17731	0.755	21.76421	27	0.74926	19.84129	26	0.79902
GCST90200824	24	0.637059	1.05444	0.84862-1.3102	0.361383	0.93697	0.81471-1.07757	0.449505	0.96124	0.86764-1.06494	0.431639	0.90629	0.71225-1.15320	0.516021	0.92425	0.73137-1.16799	-0.01732	0.35377	0.534	22.10630	23	0.51384	21.20890	22	0.50786
GCST90199861	30	0.204191	1.20483	0.90974-1.5956	0.359498	1.08494	0.91132-1.29164	0.451103	1.04881	0.92654-1.18721	0.747763	1.06187	0.73905-1.52571	0.216306	1.17253	0.91609-1.50076	-0.01557	0.29048	0.286	32.77795	29	0.28679	31.47308	28	0.29648
GCST90199698	33	0.868222	1.00776	0.92050-1.1033	0.142579	1.06973	0.97756-1.17060	0.451661	1.02483	0.96142-1.09241	0.640635	0.95987	0.80954-1.13812	0.356055	1.04118	0.95686-1.13293	0.00508	0.60776	0.389	33.89497	32	0.37623	33.60351	31	0.34236
GCST90200540	24	0.257872	0.85240	0.65105-1.1160	0.917031	1.00939	0.84657-1.20354	0.451817	1.05155	0.92249-1.19867	0.878643	0.97787	0.73605-1.29914	0.860368	0.97787	0.76419-1.25131	0.02539	0.09453	0.742	18.68397	23	0.71941	15.63086	22	0.83377
GCST90199970	17	0.431485	1.06549	0.91360-1.2426	0.193783	1.06428	0.96883-1.16913	0.452404	1.03731	0.94279-1.14130	0.588841	1.05743	0.86712-1.28950	0.225935	1.06362	0.96627-1.17079	-0.00738	0.66382	0.154	24.47330	16	0.07966	24.15671	15	0.06248
GCST90199738	24	0.305398	0.86501	0.65977-1.1341	0.996639	1.00043	0.81977-1.22090	0.452692	1.05638	0.91548-1.21896	0.68065	0.92259	0.63166-1.34751	0.7378	0.94187	0.66609-1.33181	0.02760	0.10690	0.342	24.72549	23	0.36459	21.89958	22	0.46590
GCST90200512	31	0.374781	1.10235	0.89188-1.3625	0.150739	1.10920	0.96298-1.27762	0.4536	1.03851	0.94079-1.14637	0.92589	0.98990	0.80066-1.22387	0.440863	1.06788	0.90563-1.25921	-0.00881	0.53755	0.828	22.93857	30	0.81778	22.54928	29	0.79675
GCST90200298	21	0.473016	0.89718	0.67101-1.1996	0.504543	0.93688	0.77360-1.13462	0.453626	1.05377	0.91887-1.20849	0.816858	0.96410	0.71043-1.30836	0.558689	0.93906	0.76332-1.15526	0.02774	0.23331	0.607	17.62053	20	0.61239	16.10495	19	0.65026
GCST90200188	25	0.980457	1.00323	0.77720-1.2950	0.740816	1.03192	0.85663-1.24306	0.453755	1.05094	0.92284-1.19681	0.424753	0.87991	0.64615-1.19824	0.767409	0.95735	0.71951-1.27381	0.00658	0.68243	0.772	18.50085	24	0.77806	18.32913	23	0.73940
GCST90201019	24	0.31687	1.09516	0.92030-1.3032	0.548561	1.05043	0.89445-1.23361	0.454864	1.03984	0.93857-1.15204	0.909317	0.98449	0.75454-1.28452	0.520258	1.05786	0.89352-1.25243	-0.00968	0.47559	0.494	22.89527	23	0.46690	22.35982	22	0.43860
GCST90200931	25	0.705556	0.95360	0.74756-1.2164	0.700413	0.96484	0.80401-1.15784	0.45526	0.95289	0.83953-1.08156	0.464253	0.87961	0.62730-1.23340	0.869824	0.97539	0.72628-1.30992	-0.00010	0.99447	0.412	25.67565	24	0.36983	25.67559	23	0.31642
GCST90200014	27	0.0617878	1.20293	0.99958-1.4477	0.135996	1.11050	0.96756-1.27455	0.456314	1.04397	0.93221-1.16914	0.31511	1.16869	0.86728-1.57485	0.124548	1.12059	0.97361-1.28976	-0.02714	0.07628	0.136	34.68643	26	0.11860	30.51261	25	0.20567
GCST90200300	24	0.651093	0.94669	0.74902-1.1965	0.776555	0.97497	0.81838-1.16152	0.456817	0.95610	0.84948-1.07611	0.635098	1.07649	0.79720-1.45362	0.788733	1.03193	0.82218-1.29518	0.00167	0.92383	0.309	24.89651	23	0.35564	24.88593	22	0.30256
GCST90199626	25	0.505244	0.88169	0.61231-1.2696	0.492675	1.06396	0.89125-1.27015	0.457583	1.05670	0.91360-1.22221	0.908966	0.98098	0.70822-1.35878	0.592721	1.06930	0.83926-1.36238	0.02472	0.29971	0.044	36.98187	24	0.04394	35.25629	23	0.04905
GCST90200493	23	0.826288	1.02403	0.83054-1.2626	0.290076	0.91032	0.76488-1.08341	0.458465	0.96065	0.86392-1.06821	0.364155	0.88588	0.68560-1.14467	0.28088	0.89897	0.74428-1.08581	-0.01044	0.49554	0.776	17.04289	22	0.76099	16.56184	21	0.73730
GCST90200147	30	0.342204	1.14702	0.86842-1.5150	0.475008	0.94286	0.80230-1.10804	0.458502	0.95978	0.86105-1.06982	0.590552	0.93951	0.75039-1.17630	0.51373	0.93951	0.78086-1.13040	-0.02390	0.18401	0.484	29.31056	29	0.44898	27.45514	28	0.49358
GCST90200081	31	0.540192	1.17442	0.70638-1.9526	0.381262	1.08986	0.89891-1.32137	0.459205	1.06662	0.89916-1.26525	0.178396	1.33631	0.88475-2.01832	0.227751	1.28181	0.86337-1.90304	-0.01013	0.69584	0.001	62.30071	30	0.00048	61.96757	29	0.00035
GCST90199672	24	0.67557	0.96120	0.80056-1.1541	0.719392	0.97113	0.82770-1.13942	0.460291	1.04239	0.93362-1.16382	0.304949	1.16709	0.87449-1.55759	0.492209	0.92915	0.75589-1.14212	0.01447	0.28899	0.37	23.75293	23	0.41759	22.54315	22	0.42790
GCST90200227	14	0.646959	1.10270	0.73333-1.6581	0.795053	1.02633	0.84358-1.24866	0.461445	1.05275	0.91814-1.20711	0.71287	1.06757	0.75934-1.50092	0.560667	1.09513	0.81270-1.47571	-0.00650	0.81700	0.549	12.15789	13	0.51474	12.10146	12	0.43757
GCST90200992	34	0.652003	0.97031	0.85222-1.1048	0.105198	0.90568	0.80339-1.02100	0.461731	0.97067	0.89669-1.05075	0.373565	0.89116	0.69378-1.14470	0.133505	0.90203	0.79098-1.02867	0.00007	0.99435	0.601	29.25680	33	0.65411	29.25675	32	0.60610
GCST90200224	23	0.349384	1.12198	0.88640-1.4202	0.419646	1.06527	0.91363-1.24208	0.462071	1.04305	0.93223-1.16704	0.387776	0.87029	0.63893-1.18543	0.358385	1.08151	0.91818-1.27389	-0.01405	0.49620	0.197	27.57915	22	0.19005	26.96337	21	0.17207
GCST90200357	28	0.527612	0.92207	0.71927-1.1820	0.988612	1.00115	0.85501-1.17227	0.463425	1.03946	0.93730-1.15275	0.983011	0.99656	0.72752-1.36509	0.740546	0.95436	0.72589-1.25475	0.01730	0.30799	0.443	27.32811	27	0.44620	26.23700	26	0.45014
GCST90199997	18	0.491879	1.13824	0.79351-1.6327	0.423613	1.09140	0.88093-1.35217	0.463964	1.05959	0.90752-1.23715	0.713743	1.06869	0.75379-1.51514	0.671128	1.06869	0.79062-1.44456	-0.00856	0.67242	0.944	8.63314	17	0.95107	8.44762	16	0.93441
GCST90200710	29	0.769585	0.97982	0.85602-1.1215	0.971897	1.00161	0.91603-1.09518	0.466043	1.03029	0.95086-1.11635	0.682803	1.05224	0.82631-1.33996	0.760494	1.01354	0.93037-1.10414	0.01336	0.37215	0.257	34.49781	28	0.18496	33.47662	27	0.18179
GCST90200470	34	0.311111	0.90917	0.75838-1.0899	0.857824	0.98633	0.84841-1.14666	0.466518	1.04241	0.93214-1.16574	0.73595	1.05238	0.78413-1.41238	0.814089	0.97350	0.77965-1.21556	0.02472	0.07508	0.059	47.58280	33	0.04820	43.03091	32	0.09217
GCST90200182	27	0.752852	0.98356	0.88817-1.0892	0.84637	0.99024	0.89667-1.09356	0.467848	0.97341	0.90509-1.04688	0.156469	0.83511	0.65560-1.06378	0.702246	0.98190	0.89502-1.07720	-0.00281	0.77412	0.494	26.34020	26	0.44453	26.25182	25	0.39426
GCST90200991	33	0.526403	0.93070	0.74715-1.1594	0.991214	0.99914	0.85784-1.16372	0.467946	1.04471	0.92832-1.17570	0.718049	0.94479	0.69602-1.28248	0.575451	0.92441	0.70408-1.21369	0.01590	0.23199	0.102	42.17763	32	0.10761	40.24794	31	0.12354
GCST90200339	19	0.934311	0.98457	0.68399-1.4172	0.452809	0.91771	0.73340-1.14834	0.468895	0.93700	0.78571-1.11742	0.776328	0.94401	0.63817-1.39644	0.36299	0.88542	0.68575-1.14323	-0.00634	0.76263	0.112	26.61710	18	0.08646	26.47042	17	0.06631
GCST90199776	21	0.403565	1.14441	0.83982-1.5595	0.289053	1.09869	0.92323-1.30750	0.46909	1.04753	0.92379-1.18784	0.316363	1.19095	0.85340-1.66202	0.382682	1.17805	0.82205-1.68823	-0.01280	0.54581	0.209	24.12957	20	0.23678	23.65851	19	0.20958
GCST90200442	22	0.497611	0.84739	0.52973-1.3556	0.506132	1.08258	0.85679-1.36788	0.46924	1.06559	0.89716-1.26563	0.579641	1.11010	0.77151-1.59729	0.350943	1.16501	0.85124-1.59444	0.02647	0.31668	0.262	25.38396	21	0.23092	24.11234	20	0.23752
GCST90199697	24	0.648116	1.08608	0.76551-1.5409	0.971486	0.99655	0.82468-1.20425	0.470101	0.95168	0.83200-1.08857	0.913792	1.01815	0.73774-1.40514	0.891148	0.98028	0.73936-1.29971	-0.01453	0.43126	0.799	17.33778	23	0.79235	16.69494	22	0.77997
GCST90200691	24	0.899952	0.99300	0.89116-1.1065	0.684493	0.98064	0.89241-1.07760	0.470198	0.97348	0.90500-1.04715	0.539766	1.06222	0.87836-1.28456	0.654417	0.98121	0.90400-1.06502	-0.00671	0.63113	0.599	21.86721	23	0.52828	21.63012	22	0.48214
GCST90200536	23	0.550389	1.08005	0.84226-1.3850	0.568757	1.04706	0.89389-1.22647	0.471181	1.04198	0.93171-1.16531	0.407089	1.12282	0.85831-1.46884	0.454348	1.09820	0.86297-1.39754	-0.00626	0.75462	0.579	20.17112	22	0.57234	20.07084	21	0.51678
GCST90199969	25	0.179819	1.10938	0.95766-1.2851	0.221341	1.07026	0.95991-1.19330	0.473671	1.03008	0.94986-1.11707	0.779161	1.02635	0.85747-1.22850	0.350018	1.05350	0.94643-1.17268	-0.01784	0.24824	0.885	16.22357	24	0.87984	14.82007	23	0.90097
GCST90199964	21	0.468089	0.93457	0.78130-1.1179	0.933313	1.00619	0.87080-1.16263	0.474205	0.95791	0.85148-1.07764	0.364457	1.14699	0.85856-1.53232	0.700083	1.02987	0.88852-1.19372	0.00594	0.71947	0.109	28.93202	20	0.08911	28.73105	19	0.07033
GCST90200428	13	0.686516	1.06019	0.80416-1.3977	0.997766	0.99971	0.81839-1.22122	0.474544	0.94656	0.81428-1.10033	0.963232	1.00809	0.72075-1.40999	0.560702	1.07829	0.84239-1.38025	-0.01812	0.35842	0.647	9.30489	12	0.67669	8.38625	11	0.67834
GCST90200904	23	0.133049	1.24368	0.94608-1.6349	0.258794	1.08404	0.94236-1.24703	0.474687	1.05178	0.91582-1.20792	0.134971	1.24283	0.94442-1.63553	0.116695	1.12152	0.97730-1.28702	-0.02705	0.18119	0.011	45.27937	22	0.00245	41.49942	21	0.00486
GCST90200658	28	0.707404	1.01510	0.93948-1.0968	0.759392	1.01162	0.93952-1.08925	0.476801	1.02348	0.96008-1.09107	0.0748377	1.28889	0.98546-1.68575	0.809225	1.00817	0.94430-1.07636	0.00346	0.70485	0.355	32.35073	27	0.21934	32.16925	26	0.18758
GCST90200476	23	0.125523	0.83194	0.66364-1.0429	0.763581	1.02838	0.85693-1.23414	0.476951	0.95575	0.84367-1.08272	0.30044	1.20464	0.85391-1.69942	0.403347	1.15102	0.83287-1.59070	0.02403	0.16782	0.356	23.37550	22	0.38079	21.30496	21	0.44046
GCST90199905	24	0.311944	1.12075	0.90312-1.3908	0.388439	1.07596	0.91103-1.27075	0.477436	1.04450	0.92628-1.17782	0.504659	1.11166	0.81852-1.50979	0.317142	1.12615	0.89681-1.41414	-0.00996	0.44960	0.933	14.13825	23	0.92284	13.54564	22	0.91682
GCST90200330	35	0.95186	1.00639	0.81954-1.2359	0.142786	1.10128	0.96797-1.25295	0.477715	1.03726	0.93762-1.14749	0.660903	1.06056	0.81741-1.37604	0.303509	1.07862	0.93585-1.24316	0.00496	0.74162	0.038	49.57224	34	0.04118	49.40673	33	0.03313
GCST90200789	18	0.521084	0.83444	0.48593-1.4329	0.0880103	0.80561	0.62845-1.03271	0.477946	0.92292	0.73951-1.15182	0.143045	0.71767	0.46993-1.09603	0.177262	0.75777	0.51500-1.11499	0.01198	0.69257	0.017	31.49404	17	0.01738	31.17819	16	0.01277
GCST90199835	29	0.268321	0.92809	0.81542-1.0563	0.101277	0.90620	0.80548-1.01950	0.478264	0.96915	0.88874-1.05684	0.423259	0.88474	0.65849-1.18873	0.139328	0.91258	0.81113-1.02671	0.00864	0.38534	0.459	27.25454	28	0.50442	26.47588	27	0.49233
GCST90200968	24	0.633956	1.03388	0.90311-1.1836	0.66667	0.97422	0.86506-1.09716	0.479803	0.96791	0.88419-1.05956	0.547733	0.93710	0.76061-1.15455	0.630724	0.97204	0.86723-1.08951	-0.01513	0.21371	0.519	23.23174	23	0.44731	21.59211	22	0.48445
GCST90200749	14	0.364012	0.86454	0.63896-1.1698	0.205505	0.89936	0.76317-1.05986	0.480823	0.95550	0.84191-1.08441	0.996817	1.00061	0.74548-1.34306	0.312837	0.91455	0.77410-1.08048	0.01826	0.48888	0.66	10.30893	13	0.66850	9.79911	12	0.63358
GCST90200017	30	0.533042	1.09914	0.81955-1.4741	0.0279777	1.20282	1.02017-1.41817	0.481143	1.05339	0.91146-1.21742	0.13727	1.22950	0.94331-1.60250	0.0277078	1.22043	1.03124-1.44432	-0.00610	0.74540	<0.001	55.09028	29	0.00242	54.87950	28	0.00176
GCST90200912	26	0.341591	0.89418	0.71336-1.1208	0.990962	0.99899	0.83818-1.19064	0.482222	1.04674	0.92152-1.18898	0.551442	0.88074	0.58317-1.33013	0.364577	0.85184	0.60611-1.19719	0.02611	0.11589	0.18	31.17400	25	0.18332	28.06249	24	0.25741
GCST90200235	27	0.84376	1.00605	0.94804-1.0676	0.585679	1.01387	0.96489-1.06533	0.482276	1.01791	0.96873-1.06959	0.608573	1.04546	0.88371-1.23680	0.435723	1.01872	0.97300-1.06660	0.00721	0.48031	0.192	36.54967	26	0.08201	35.81419	25	0.07447
GCST90200844	17	0.340801	0.83523	0.58348-1.1956	0.536361	0.94118	0.77663-1.14059	0.482622	0.94963	0.82203-1.09703	0.605552	0.92091	0.67779-1.25125	0.686144	0.94164	0.70716-1.25388	0.01585	0.45549	0.962	7.25093	16	0.96812	6.66398	15	0.96631
GCST90199694	26	0.992665	0.99839	0.71018-1.4035	0.528512	0.94476	0.79172-1.12737	0.48342	0.95012	0.82344-1.09629	0.649038	0.92453	0.66208-1.29101	0.720519	0.94439	0.69269-1.28754	-0.00699	0.75512	0.062	37.07281	25	0.05682	36.91971	24	0.04457
GCST90200885	29	0.457626	1.08369	0.87926-1.3357	0.46175	1.06259	0.90397-1.24904	0.483653	1.03998	0.93193-1.16056	0.431245	1.13403	0.83283-1.54417	0.556753	1.07443	0.84808-1.36119	-0.00571	0.65383	0.7	23.53367	28	0.70589	23.32803	27	0.66727
GCST90200005	25	0.33219	0.87195	0.66489-1.1435	0.984946	1.00177	0.83334-1.20425	0.483755	0.95365	0.83502-1.08913	0.772546	0.95471	0.69973-1.30261	0.896655	1.02043	0.75449-1.38010	0.01201	0.46515	0.652	20.87192	24	0.64627	20.32024	23	0.62252
GCST90200473	14	0.618931	0.91354	0.64560-1.2927	0.87062	1.01869	0.81524-1.27290	0.48423	0.93365	0.77025-1.13170	0.842576	1.03384	0.74929-1.42645	0.731046	1.04979	0.80048-1.37674	0.00356	0.88297	0.127	19.37248	13	0.11200	19.33604	12	0.08074
GCST90199860	39	0.10595	1.09007	0.98436-1.2071	0.128094	1.07558	0.97923-1.18142	0.484417	1.02526	0.95601-1.09953	0.905167	0.98588	0.78146-1.24378	0.189941	1.06656	0.97026-1.17243	-0.01424	0.11419	0.683	32.53429	38	0.71982	29.91690	37	0.78925
GCST90200437	25	0.382095	1.13476	0.85930-1.4985	0.773418	1.03163	0.83455-1.27525	0.486015	1.05101	0.91372-1.20893	0.8276	0.96352	0.69212-1.34134	0.959582	1.00651	0.78525-1.29011	-0.01230	0.53784	0.579	22.28504	24	0.56226	21.89387	23	0.52667
GCST90200517	25	0.692769	0.95724	0.77276-1.1858	0.851967	0.98343	0.82512-1.17211	0.486901	1.04516	0.92279-1.18375	0.541616	1.10955	0.79845-1.54186	0.405318	0.89822	0.70069-1.15145	0.01338	0.33287	0.278	26.26177	24	0.34002	25.19012	23	0.34056
GCST90200250	23	0.789192	0.98816	0.90655-1.0771	0.78432	1.01134	0.93287-1.09641	0.486956	1.02438	0.95711-1.09638	0.911431	1.01049	0.84247-1.21203	0.688036	1.01445	0.94670-1.08705	0.01332	0.20845	0.272	27.05175	22	0.20927	25.04335	21	0.24529
GCST90200545	19	0.721752	0.96680	0.80532-1.1607	0.428739	0.93685	0.79709-1.10112	0.488935	0.96155	0.86049-1.07448	0.930176	1.01055	0.80175-1.27372	0.568853	0.95452	0.81568-1.11700	-0.00131	0.94225	0.849	12.23903	18	0.83465	12.23363	17	0.78579
GCST90199710	23	0.311036	0.90462	0.74862-1.0931	0.673745	0.96547	0.81975-1.13708	0.489166	1.03868	0.93276-1.15663	0.326736	1.18164	0.85280-1.63726	0.51608	0.94248	0.79046-1.12374	0.02228	0.10257	0.3	24.71098	22	0.31109	21.70013	21	0.41696
GCST90200262	27	0.458305	1.06802	0.89995-1.2675	0.619441	1.02927	0.91850-1.15341	0.489221	1.03241	0.94318-1.13008	0.816148	1.02361	0.84247-1.24370	0.49055	1.04188	0.92872-1.16882	-0.00724	0.64958	0.128	35.23327	26	0.10670	34.93772	25	0.08934
GCST90200158	28	0.789935	1.06090	0.68977-1.6317	0.350513	0.91871	0.76892-1.09769	0.489315	0.93747	0.78065-1.12578	0.791657	0.95878	0.70372-1.30627	0.403692	0.89079	0.68193-1.16362	-0.01616	0.53822	<0.001	65.50985	27	0.00005	64.54397	26	0.00004
GCST90200273	22	0.894119	0.98968	0.85118-1.1507	0.841989	1.01363	0.88728-1.15798	0.490425	1.03381	0.94058-1.13629	0.561935	1.05750	0.87807-1.27359	0.767517	1.01821	0.90478-1.14587	0.01120	0.47188	0.5	21.75790	21	0.41357	21.18822	20	0.38613
GCST90200975	22	0.724462	0.95416	0.73773-1.2341	0.106363	0.87506	0.74419-1.02895	0.490931	0.95590	0.84078-1.08679	0.1991	0.82962	0.62946-1.09343	0.219971	0.84098	0.64297-1.09998	0.00031	0.98726	0.219	26.00194	21	0.20637	26.00160	20	0.16576
GCST90200216	23	0.162602	0.76137	0.52630-1.1014	0.887668	0.98716	0.82512-1.18102	0.492503	0.95225	0.82807-1.09505	0.695292	1.06320	0.78555-1.43898	0.975009	0.99544	0.75052-1.32029	0.02933	0.21455	0.173	28.30748	22	0.16571	26.25915	21	0.19674
GCST90200932	21	0.507212	1.22174	0.68356-2.1837	0.328659	1.11276	0.89804-1.37883	0.492922	1.05566	0.90423-1.23245	0.321745	1.20835	0.83876-1.74079	0.449686	1.12985	0.82840-1.54100	-0.01549	0.61478	0.681	16.78463	20	0.66691	16.52283	19	0.62216
GCST90199847	24	0.421638	1.16265	0.81058-1.6677	0.500895	1.06473	0.88699-1.27807	0.492936	1.05992	0.89749-1.25174	0.702748	1.08940	0.70560-1.68196	0.386574	1.19418	0.80523-1.77100	-0.01211	0.57522	<0.001	49.60993	23	0.00104	48.89079	22	0.00083
GCST90200683	23	0.84551	0.98984	0.89432-1.0956	0.578122	0.97457	0.88999-1.06719	0.493222	0.97685	0.91353-1.04455	0.630758	0.95997	0.81455-1.13135	0.485887	0.96860	0.88679-1.05794	-0.00460	0.73739	0.677	19.98189	22	0.58417	19.86643	21	0.52974
GCST90200169	24	0.406245	1.14429	0.83761-1.5632	0.213638	1.13381	0.93021-1.38196	0.493592	1.05089	0.91168-1.21134	0.46479	1.15441	0.79057-1.68569	0.265714	1.19895	0.87782-1.63755	-0.01167	0.55258	0.38	24.45711	23	0.37887	24.05928	22	0.34413
GCST90199973	27	0.45713	0.97406	0.90983-1.0428	0.559686	0.97864	0.91016-1.05228	0.494044	0.98146	0.93021-1.03554	0.147462	0.85637	0.69865-1.04969	0.533427	0.97916	0.91719-1.04533	0.00342	0.72338	0.561	25.63069	26	0.48354	25.49999	25	0.43465
GCST90200288	22	0.256051	1.07760	0.95072-1.2214	0.232953	1.05766	0.96458-1.15973	0.494469	1.03147	0.94373-1.12737	0.482811	0.91213	0.70872-1.17391	0.323567	1.05112	0.95427-1.15780	-0.01248	0.34234	0.315	25.85198	21	0.21215	24.68430	20	0.21378
GCST90200219	20	0.532704	1.05795	0.88937-1.2585	0.861456	0.98945	0.87839-1.11456	0.494732	0.97224	0.89675-1.05408	0.596013	1.05172	0.87556-1.26332	0.918157	1.00649	0.89109-1.13683	-0.01714	0.29525	0.932	11.27357	19	0.91429	10.11137	18	0.92821
GCST90199792	18	0.0169071	1.73907	1.15782-2.6121	0.221958	1.11117	0.93823-1.31599	0.495037	1.05295	0.90790-1.22117	0.456387	1.10626	0.85326-1.43428	0.146675	1.15658	0.95887-1.39506	-0.06560	0.02146	0.104	24.90020	17	0.09697	17.71032	16	0.34113
GCST90200145	32	0.672418	0.94730	0.73888-1.2145	0.893976	1.00981	0.87480-1.16565	0.495319	0.96418	0.86821-1.07076	0.564226	0.91092	0.66560-1.24665	0.707004	0.96825	0.81958-1.14389	0.00264	0.87850	0.06	44.28647	31	0.05761	44.25141	30	0.04525
GCST90200146	29	0.957303	0.99409	0.80182-1.2325	0.497418	1.04430	0.92141-1.18357	0.496436	1.03364	0.93964-1.13704	0.654653	1.04279	0.86958-1.25050	0.638891	1.04279	0.87703-1.23988	0.00700	0.69457	0.872	20.81774	28	0.83286	20.66022	27	0.80194
GCST90199716	17	0.354623	1.08401	0.91865-1.2791	0.529723	1.04562	0.90980-1.20172	0.497218	1.03934	0.92978-1.16180	0.972826	0.99444	0.72504-1.36394	0.557671	1.04502	0.90476-1.20702	-0.00965	0.51074	0.839	10.93346	16	0.81357	10.47957	15	0.78854
GCST90199733	25	0.0154144	1.41276	1.09061-1.8301	0.393092	1.08071	0.90437-1.29145	0.49742	1.04562	0.91920-1.18942	0.376105	1.16254	0.83802-1.61272	0.249329	1.14557	0.91419-1.43553	-0.04232	0.01694	0.288	27.48374	24	0.28241	20.85456	23	0.58997
GCST90199985	21	0.842354	1.02803	0.78574-1.3450	0.425589	0.92861	0.77395-1.11419	0.498116	0.95581	0.83864-1.08934	0.612217	0.93172	0.71186-1.21950	0.518624	0.92473	0.73223-1.16785	-0.01164	0.55035	0.829	14.83109	20	0.78599	14.46136	19	0.75616
GCST90199658	22	0.133697	0.73922	0.50610-1.0797	0.268417	0.88979	0.72356-1.09421	0.498527	0.94511	0.80258-1.11296	0.255704	0.78861	0.52950-1.17452	0.200701	0.78443	0.54716-1.12461	0.02758	0.17624	0.125	29.00899	21	0.11379	26.41302	20	0.15260
GCST90200176	15	0.635867	0.86490	0.48100-1.5552	0.686608	0.94810	0.73182-1.22829	0.498755	0.93458	0.76822-1.13698	0.856439	0.96002	0.62205-1.48163	0.920983	0.97949	0.65510-1.46449	0.00867	0.78701	0.259	17.46888	14	0.23205	17.36724	13	0.18306
GCST90200608	27	0.368552	0.94446	0.83574-1.0673	0.890285	1.00870	0.89193-1.14075	0.499094	1.03038	0.94472-1.12381	0.446908	1.08756	0.87890-1.34576	0.803089	1.01582	0.89904-1.14777	0.02350	0.05872	0.783	20.57070	26	0.76377	16.64727	25	0.89419
GCST90200803	19	0.737745	0.95903	0.75373-1.2202	0.706955	0.96664	0.80995-1.15366	0.49975	0.95632	0.83998-1.08877	0.998396	1.00031	0.74478-1.34350	0.96578	0.99376	0.74942-1.31776	-0.00044	0.97850	0.946	9.68436	18	0.94172	9.68362	17	0.91635
GCST90199798	29	0.814969	1.02939	0.80956-1.3089	0.710395	0.97408	0.84800-1.11891	0.500528	1.03941	0.92884-1.16314	0.80615	0.96878	0.75376-1.24513	0.672899	0.96489	0.81880-1.13705	0.00153	0.92900	0.017	44.58589	28	0.02429	44.57253	27	0.01803
GCST90200233	33	0.868122	1.02329	0.78149-1.3399	0.332608	1.08464	0.92025-1.27839	0.501682	1.04123	0.92546-1.17147	0.825446	1.04102	0.73042-1.48370	0.933976	1.01453	0.72312-1.42338	0.00203	0.88922	0.707	26.43810	32	0.74391	26.41838	31	0.70105
GCST90199872	32	0.975297	0.99688	0.81938-1.2128	0.127757	0.87889	0.74435-1.03774	0.503104	0.96282	0.86174-1.07575	0.360511	0.85681	0.61823-1.18745	0.13154	0.84899	0.69014-1.04440	-0.00464	0.67644	0.626	26.73219	31	0.68556	26.55457	30	0.64655
GCST90199714	29	0.363173	0.84917	0.60053-1.2008	0.664658	0.96535	0.82306-1.13223	0.503751	0.95370	0.82996-1.09589	0.802042	0.96280	0.71786-1.29132	0.90627	0.98423	0.75719-1.27934	0.01430	0.47880	0.014	46.31538	28	0.01616	45.44714	27	0.01458
GCST90200746	23	0.538508	1.08186	0.84541-1.3844	0.390622	1.06794	0.91912-1.24087	0.504016	1.03636	0.93329-1.15081	0.291298	1.16037	0.88614-1.51946	0.366328	1.13284	0.86910-1.47661	-0.00672	0.70981	0.861	15.37549	22	0.84563	15.23321	21	0.81107
GCST90200309	36	0.258675	0.85261	0.64952-1.1192	0.67029	0.96312	0.81011-1.14502	0.505379	1.04155	0.92396-1.17409	0.49184	0.89473	0.65373-1.22458	0.449511	0.92599	0.76037-1.12768	0.02724	0.11931	0.192	42.64099	35	0.17551	39.66235	34	0.23216
GCST90200742	19	0.727945	0.93343	0.63719-1.3674	0.945188	0.99259	0.80301-1.22694	0.505433	0.95012	0.81728-1.10454	0.900422	1.02394	0.71056-1.47553	0.665166	1.06294	0.80990-1.39504	0.00246	0.92188	0.422	18.59960	18	0.41686	18.58877	17	0.35264
GCST90199665	20	0.925661	0.99322	0.86263-1.1436	0.87047	0.98797	0.85423-1.14265	0.50579	0.96742	0.87748-1.06657	0.0693883	0.77974	0.60521-1.00459	0.710814	0.97374	0.84772-1.11849	-0.00615	0.61828	0.699	15.94797	19	0.66075	15.69087	18	0.61411
GCST90200565	26	0.0789275	1.23615	0.98566-1.5503	0.141564	1.12242	0.96224-1.30926	0.506308	1.04552	0.91689-1.19219	0.200416	1.18522	0.92004-1.52683	0.0848523	1.18522	0.98444-1.42696	-0.03058	0.09359	0.077	36.71034	25	0.06149	32.57252	24	0.11342
GCST90199895	16	0.160365	0.77992	0.56147-1.0834	0.162927	0.87024	0.71589-1.05786	0.507099	0.95253	0.82502-1.09974	0.525419	0.89839	0.65041-1.24093	0.320578	0.87887	0.68696-1.12439	0.02761	0.20664	0.474	15.16213	15	0.43980	13.40852	14	0.49464
GCST90200093	25	0.427807	0.89805	0.69168-1.1660	0.682442	1.03773	0.86901-1.23923	0.507236	1.04277	0.92136-1.18018	0.282205	1.18911	0.87338-1.61898	0.579923	1.08051	0.82444-1.41611	0.02187	0.21543	0.81	18.23288	24	0.79157	16.61013	23	0.82793
GCST90199650	27	0.436988	0.89618	0.68278-1.1763	0.684325	1.03823	0.86644-1.24409	0.507919	1.04290	0.92095-1.18100	0.414519	1.16385	0.81309-1.66592	0.423481	1.13990	0.83140-1.56287	0.01919	0.23065	0.668	21.21917	26	0.73056	19.70961	25	0.76189
GCST90200164	29	0.465212	1.04148	0.93530-1.1597	0.229896	1.05352	0.96756-1.14712	0.508003	1.02494	0.95283-1.10251	0.647473	0.95043	0.76614-1.17906	0.386226	1.03782	0.95548-1.12725	-0.00400	0.69058	0.252	34.40983	28	0.18770	34.20472	27	0.16018
GCST90200699	25	0.577053	1.05163	0.88332-1.2520	0.223591	1.08556	0.95112-1.23900	0.508397	1.03082	0.94213-1.12787	0.799864	1.03190	0.81163-1.31196	0.405874	1.06068	0.92536-1.21579	-0.00343	0.79555	0.688	20.54808	24	0.66522	20.47937	23	0.61285
GCST90200278	17	0.283564	0.81246	0.56343-1.1715	0.820605	0.97565	0.78839-1.20738	0.509559	1.05621	0.89778-1.24260	0.646244	0.90310	0.58921-1.38421	0.600199	0.91682	0.66688-1.26045	0.02926	0.14133	0.231	20.30121	16	0.20696	17.49000	15	0.29043
GCST90200557	21	0.590143	1.09228	0.79653-1.4978	0.728049	1.03655	0.84666-1.26903	0.509887	1.05109	0.90631-1.21901	0.726006	1.05844	0.77383-1.44773	0.997696	0.99952	0.72275-1.38227	-0.00569	0.78851	0.305	23.44451	20	0.26750	23.35353	19	0.22213
GCST90200429	29	0.852748	0.98654	0.85617-1.1368	0.517175	0.95891	0.84456-1.08874	0.511502	0.96817	0.87906-1.06632	0.0998116	0.79717	0.61402-1.03494	0.557977	0.96506	0.85801-1.08546	-0.00485	0.72164	0.175	36.75959	28	0.12426	36.58398	27	0.10310
GCST90200996	18	0.537271	0.92808	0.73591-1.1704	0.62738	0.95596	0.79700-1.14662	0.511801	0.95926	0.84718-1.08618	0.692758	0.93291	0.66491-1.30894	0.890198	0.97892	0.72664-1.31878	0.00578	0.74250	0.397	17.46622	17	0.42324	17.34507	16	0.36361
GCST90200181	27	0.966341	1.00851	0.68301-1.4891	0.177895	0.87023	0.71091-1.06526	0.512444	0.95358	0.82716-1.09932	0.53691	0.87924	0.58755-1.31574	0.46947	0.87924	0.62355-1.23978	-0.00589	0.76474	0.811	19.75860	26	0.80286	19.66707	25	0.76406
GCST90200765	20	0.44305	1.15757	0.80305-1.6686	0.382403	0.91225	0.74235-1.12103	0.512989	0.94776	0.80702-1.11304	0.685249	0.92269	0.62899-1.35353	0.610861	0.90503	0.62013-1.32081	-0.02282	0.24937	0.207	23.60981	19	0.21155	21.88687	18	0.23705
GCST90200070	34	0.539004	1.08243	0.84299-1.3899	0.5057	1.04426	0.91922-1.18631	0.513231	1.04266	0.91992-1.18178	0.133304	1.21801	0.94750-1.56575	0.397276	1.05552	0.93290-1.19426	-0.00545	0.73559	<0.001	78.55622	33	0.00001	78.27238	32	0.00001
GCST90200137	26	0.0646506	1.19163	0.99789-1.4230	0.646	1.03021	0.90734-1.16971	0.514291	1.02922	0.94388-1.12229	0.73941	1.03537	0.84552-1.26785	0.498858	1.04649	0.91911-1.19153	-0.02826	0.07606	0.81	19.13397	25	0.79065	15.69638	24	0.89872
GCST90200068	28	0.983298	0.99744	0.78644-1.2651	0.339123	1.07745	0.92463-1.25552	0.514511	1.03633	0.93088-1.15373	0.801599	1.03931	0.77162-1.39988	0.350856	1.09117	0.91130-1.30656	0.00606	0.72541	0.196	33.35822	27	0.18550	33.19726	26	0.15645
GCST90200034	28	0.88386	1.02469	0.74107-1.4168	0.232428	1.11872	0.93057-1.34491	0.514876	1.05431	0.89917-1.23623	0.285316	1.19130	0.86962-1.63197	0.282022	1.18286	0.87641-1.59647	0.00399	0.84375	0.029	42.80968	27	0.02734	42.74452	26	0.02054
GCST90200687	19	0.818127	1.01462	0.89823-1.1461	0.532322	1.03160	0.93562-1.13743	0.516911	1.02619	0.94901-1.10965	0.81054	0.97341	0.78345-1.20944	0.54098	1.02902	0.94047-1.12592	0.00281	0.81491	0.934	11.00579	18	0.89411	10.94927	17	0.85919
GCST90200411	34	0.155364	0.84551	0.67446-1.0599	0.135924	0.87896	0.74186-1.04140	0.517031	0.96088	0.85163-1.08416	0.913497	0.98222	0.71232-1.35437	0.0231421	0.76922	0.61985-0.95459	0.02132	0.20072	0.077	42.44281	33	0.12562	40.29369	32	0.14907
GCST90200725	22	0.693802	0.95453	0.75966-1.1994	0.734594	1.02545	0.88677-1.18582	0.51707	1.03869	0.92600-1.16510	0.820561	1.03133	0.79260-1.34197	0.833097	1.02062	0.84614-1.23107	0.01511	0.41021	0.06	32.78899	21	0.04861	31.66869	20	0.04696
GCST90199676	30	0.724542	0.95060	0.71922-1.2564	0.755136	0.97563	0.83550-1.13927	0.517613	1.04392	0.91647-1.18909	0.857382	1.02340	0.79697-1.31418	0.711297	0.96234	0.78687-1.17694	0.01552	0.46209	0.013	46.43563	29	0.02123	45.53152	28	0.01948
GCST90200637	23	0.490965	1.10506	0.83577-1.4611	0.803305	1.02349	0.85256-1.22870	0.518526	1.04040	0.92253-1.17333	0.656955	0.93008	0.67840-1.27514	0.788372	0.97111	0.78604-1.19976	-0.00912	0.64267	0.427	22.98483	22	0.40259	22.74481	21	0.35773
GCST90199719	26	0.932023	0.99587	0.90644-1.0941	0.108697	1.07134	0.98483-1.16545	0.520214	1.02174	0.95691-1.09096	0.989933	1.00133	0.81577-1.22910	0.219291	1.05569	0.97034-1.14854	0.00926	0.45998	0.291	27.94592	25	0.31035	27.30435	24	0.29047
GCST90199965	26	0.603692	1.06527	0.84167-1.3483	0.431753	1.07224	0.90110-1.27588	0.521364	1.04011	0.92231-1.17295	0.464849	1.13629	0.81089-1.59226	0.414855	1.16169	0.81513-1.65560	-0.00340	0.81909	0.601	22.48197	25	0.60778	22.42850	24	0.55371
GCST90200484	30	0.477324	0.90098	0.67841-1.1966	0.589994	0.95923	0.82445-1.11604	0.522724	1.04075	0.92078-1.17634	0.685202	0.93248	0.66729-1.30306	0.615286	0.92842	0.69712-1.23648	0.02206	0.27925	0.04	43.79304	29	0.03839	41.96823	28	0.04366
GCST90200786	28	0.664868	0.94804	0.74676-1.2036	0.8061	1.02002	0.87073-1.19490	0.524138	1.03822	0.92505-1.16524	0.726108	1.05969	0.76871-1.46081	0.738376	1.04929	0.79348-1.38758	0.01373	0.40168	0.569	25.33459	27	0.55572	24.60770	26	0.54126
GCST90199953	20	0.313278	0.89678	0.72995-1.1017	0.481527	0.94587	0.81008-1.10442	0.52459	0.96611	0.86877-1.07436	0.431843	0.90943	0.72135-1.14655	0.427616	0.92414	0.76365-1.11836	0.01228	0.41861	0.623	17.09937	19	0.58314	16.41408	18	0.56367
GCST90201009	33	0.414131	1.07519	0.90560-1.2765	0.675632	1.02948	0.89849-1.17956	0.524795	0.96945	0.88105-1.06672	0.603859	1.06756	0.83599-1.36327	0.680456	1.04116	0.86083-1.25926	-0.01711	0.16742	0.335	35.31702	32	0.31424	33.17807	31	0.36141
GCST90200638	29	0.255812	1.13041	0.91910-1.3903	0.448559	1.05621	0.91690-1.21668	0.525869	1.03186	0.93656-1.13686	0.737662	1.04679	0.80315-1.36435	0.65797	1.05361	0.83819-1.32439	-0.01363	0.33687	0.914	18.93461	28	0.90014	17.97857	27	0.90417
GCST90200899	27	0.912801	1.02239	0.69057-1.5137	0.767122	0.97201	0.80552-1.17291	0.526451	1.05268	0.89805-1.23394	0.926545	1.01546	0.73513-1.40270	0.754719	0.95421	0.71330-1.27648	0.00351	0.87407	0.03	40.58246	26	0.03417	40.54088	25	0.02564
GCST90200521	17	0.946689	0.98471	0.63165-1.5351	0.955936	0.99373	0.79510-1.24199	0.527989	0.94229	0.78344-1.13335	0.682743	1.08105	0.74900-1.56030	0.87613	1.02535	0.75224-1.39760	-0.00523	0.83252	0.341	18.77560	16	0.28047	18.71781	15	0.22681
GCST90201008	20	0.326023	0.83820	0.59505-1.1807	0.949723	1.00593	0.83712-1.20877	0.531166	0.95818	0.83827-1.09525	0.791114	1.04375	0.76366-1.42658	0.916918	1.01421	0.78069-1.31759	0.01531	0.41674	0.713	15.25509	19	0.70625	14.56416	18	0.69164
GCST90200378	20	0.475083	0.87255	0.60493-1.2586	0.816631	0.97638	0.79773-1.19503	0.53175	1.04989	0.90131-1.22297	0.743389	0.93550	0.63126-1.38639	0.452391	0.88167	0.63910-1.21629	0.02275	0.29100	0.201	24.17074	19	0.18968	22.67955	18	0.20321
GCST90200483	23	0.523648	0.87442	0.58291-1.3117	0.939259	0.99275	0.82334-1.19702	0.532294	1.04657	0.90724-1.20730	0.780484	0.94948	0.66233-1.36112	0.994354	0.99889	0.73679-1.35422	0.02198	0.36370	0.13	29.11301	22	0.14166	27.96499	21	0.14115
GCST90199679	21	0.424743	1.20544	0.76945-1.8885	0.423647	0.93233	0.78527-1.10692	0.533938	0.95741	0.83472-1.09814	0.510561	0.89760	0.65436-1.23125	0.455215	0.89005	0.65952-1.20116	-0.02731	0.30409	0.783	15.16036	20	0.76716	14.04464	19	0.78108
GCST90199992	27	0.113773	1.14230	0.97426-1.3393	0.226397	1.06259	0.96305-1.17242	0.534475	1.03274	0.93293-1.14321	0.92741	1.01115	0.79831-1.28074	0.208047	1.06104	0.96976-1.16092	-0.02368	0.12564	0.021	46.35568	26	0.00832	42.12495	25	0.01742
GCST90200455	26	0.753189	1.04892	0.78148-1.4079	0.595013	1.04653	0.88497-1.23757	0.535153	1.03662	0.92525-1.16139	0.913319	0.98413	0.74002-1.30877	0.928171	1.01004	0.81455-1.25246	-0.00160	0.93257	0.439	25.69205	25	0.42417	25.68423	24	0.36938
GCST90200243	31	0.355993	1.13498	0.87114-1.4787	0.133599	1.11882	0.96616-1.29559	0.535504	0.95922	0.84086-1.09424	0.687891	1.06336	0.79024-1.43089	0.214345	1.10637	0.94639-1.29340	-0.02516	0.16361	0.003	54.31918	30	0.00424	50.74465	29	0.00750
GCST90200392	33	0.417588	0.95857	0.86654-1.0604	0.181582	0.93832	0.85465-1.03019	0.537393	0.97914	0.91571-1.04697	0.359293	1.09670	0.90284-1.33220	0.302284	0.95256	0.86983-1.04316	0.00528	0.58548	0.591	29.85705	32	0.57541	29.55329	31	0.54044
GCST90199822	32	0.55362	1.07777	0.84354-1.3770	0.815784	0.98102	0.83494-1.15265	0.538064	0.96571	0.86419-1.07915	0.962455	0.99306	0.74487-1.32395	0.686979	1.05207	0.82379-1.34361	-0.01576	0.33241	0.763	25.12686	31	0.76201	24.15625	30	0.76491
GCST90200375	27	0.581486	1.12231	0.74859-1.6826	0.922965	1.01038	0.81958-1.24560	0.539442	0.95208	0.81386-1.11377	0.363027	1.20893	0.80903-1.80651	0.318547	1.18846	0.85205-1.65771	-0.01941	0.39562	0.087	36.51397	26	0.08261	35.45447	25	0.08029
GCST90200831	18	0.467904	1.11192	0.84068-1.4707	0.816515	1.02299	0.84427-1.23955	0.539564	0.95433	0.82195-1.10804	0.842341	1.03663	0.73113-1.46979	0.585939	1.07638	0.83011-1.39570	-0.02186	0.22620	0.148	22.20849	17	0.17683	20.20756	16	0.21102
GCST90200942	26	0.593714	1.08360	0.80997-1.4497	0.857636	0.98239	0.80905-1.19287	0.540947	0.95495	0.82378-1.10702	0.926871	1.01859	0.69008-1.50348	0.908797	0.98250	0.72850-1.32504	-0.01774	0.33300	0.082	35.89911	25	0.07314	34.49599	24	0.07623
GCST90200449	17	0.58174	0.96471	0.85130-1.0932	0.99599	1.00030	0.88959-1.12478	0.544946	1.02825	0.93955-1.12533	0.935218	0.98838	0.74885-1.30452	0.949921	0.99624	0.88744-1.11839	0.01783	0.16947	0.796	11.52426	16	0.77603	9.44087	15	0.85336
GCST90200747	20	0.711292	0.91905	0.59190-1.4270	0.874338	1.01851	0.81146-1.27839	0.545572	1.05382	0.88907-1.24911	0.95961	0.98813	0.62620-1.55925	0.708719	0.92145	0.60375-1.40633	0.01676	0.51595	0.22	23.54204	19	0.21431	22.98141	18	0.19131
GCST90200120	18	0.304148	0.86758	0.66746-1.1277	0.909702	0.99127	0.85182-1.15354	0.546152	1.03388	0.92785-1.15202	0.918516	0.98651	0.76345-1.27474	0.72195	0.95789	0.75877-1.20928	0.02947	0.16946	0.702	14.27849	17	0.64730	12.20810	16	0.72953
GCST90199629	32	0.581938	1.06776	0.84763-1.3450	0.648149	1.03779	0.88494-1.21704	0.549925	0.96693	0.86599-1.07963	0.943888	1.01116	0.74410-1.37408	0.865392	1.02185	0.79752-1.30928	-0.01422	0.34549	0.519	30.20326	31	0.50682	29.28459	30	0.50269
GCST90200503	27	0.469847	0.98752	0.95496-1.0212	0.442971	0.98835	0.95921-1.01838	0.552439	0.99097	0.96173-1.02108	0.321876	1.11281	0.90432-1.36936	0.390773	0.98787	0.96116-1.01532	0.00524	0.63434	0.373	34.18173	26	0.13051	33.86764	25	0.11077
GCST90200454	31	0.984067	1.00188	0.83493-1.2022	0.450511	1.05572	0.91702-1.21540	0.554246	1.02921	0.93553-1.13227	0.823796	1.02604	0.81985-1.28410	0.46708	1.05171	0.91967-1.20271	0.00469	0.73647	0.94	19.20809	30	0.93554	19.09264	29	0.91889
GCST90200572	16	0.848448	0.97969	0.79681-1.2045	0.648583	0.96288	0.81830-1.13300	0.554338	0.96512	0.85799-1.08564	0.340652	0.87718	0.67568-1.13876	0.783666	0.97516	0.81751-1.16322	-0.00290	0.86298	0.498	15.20845	15	0.43651	15.17496	14	0.36630
GCST90200757	20	0.895412	0.98878	0.83767-1.1672	0.709046	0.98121	0.88815-1.08402	0.555594	0.96905	0.87287-1.07584	0.402139	1.12297	0.86134-1.46406	0.67367	0.97885	0.88749-1.07961	-0.00531	0.75867	0.103	29.86806	19	0.05350	29.70746	18	0.04039
GCST90200255	27	0.163045	0.85019	0.68139-1.0608	0.576942	0.95294	0.80446-1.12882	0.555595	0.96680	0.86411-1.08169	0.787027	1.04030	0.78338-1.38147	0.651627	0.95042	0.76410-1.18217	0.02180	0.19852	0.681	22.22508	26	0.67632	20.48045	25	0.72119
GCST90200156	26	0.810554	1.02638	0.83152-1.2669	0.734038	0.97167	0.82321-1.14690	0.55745	0.96616	0.86117-1.08394	0.537327	0.91976	0.70770-1.19537	0.494043	0.91976	0.72627-1.16480	-0.00988	0.50785	0.486	24.47841	25	0.49189	24.02601	24	0.46011
GCST90200077	24	0.2086	0.81817	0.60391-1.1084	0.526959	0.94811	0.80384-1.11828	0.559137	1.04167	0.90832-1.19459	0.0645523	1.38838	0.99687-1.93366	0.0883525	0.86590	0.73892-1.01470	0.04113	0.09777	0.006	42.13362	23	0.00876	37.09178	22	0.02311
GCST90199885	20	0.488693	1.07685	0.87699-1.3223	0.311717	0.91991	0.78254-1.08140	0.559427	0.96605	0.86025-1.08486	0.344534	0.87021	0.65697-1.15266	0.391156	0.92302	0.77182-1.10385	-0.01797	0.22800	0.452	20.24023	19	0.38025	18.62821	18	0.41505
GCST90200154	21	0.410757	1.20225	0.78267-1.8468	0.716909	1.03885	0.84541-1.27656	0.559951	0.95320	0.81133-1.11988	0.580143	1.11838	0.75724-1.65174	0.649839	1.07599	0.78802-1.46920	-0.02567	0.26757	0.183	24.90623	20	0.20504	23.30598	19	0.22413
GCST90200770	19	0.560628	1.10436	0.79571-1.5327	0.36769	1.09073	0.90293-1.31758	0.560368	1.04824	0.89453-1.22835	0.449157	1.14875	0.80845-1.63230	0.321754	1.12945	0.89365-1.42748	-0.00820	0.72391	0.051	28.99419	18	0.04845	28.77587	17	0.03665
GCST90200625	24	0.953776	1.00870	0.75510-1.3475	0.152683	1.12776	0.95643-1.32979	0.5605	1.03970	0.91196-1.18533	0.321214	1.17610	0.85952-1.60927	0.23163	1.18989	0.90169-1.57020	0.00461	0.81939	0.06	34.33390	23	0.06048	34.25077	22	0.04631
GCST90200597	21	0.682989	0.94065	0.70446-1.2560	0.648816	1.04029	0.87765-1.23308	0.56079	1.03703	0.91744-1.17223	0.797124	1.04116	0.76863-1.41032	0.65571	1.06967	0.79906-1.43194	0.01375	0.47428	0.779	14.92107	20	0.78091	14.38813	19	0.76061
GCST90199642	34	0.875914	0.99289	0.90849-1.0851	0.827945	0.99052	0.90902-1.07934	0.560861	0.98108	0.91992-1.04631	0.187376	0.88357	0.73786-1.05805	0.880944	0.99361	0.91430-1.07981	-0.00369	0.70420	0.628	30.51180	33	0.59159	30.36506	32	0.54940
GCST90199661	23	0.257095	0.83142	0.60943-1.1343	0.257688	0.89212	0.73211-1.08711	0.561367	0.95966	0.83515-1.10273	0.518329	0.90285	0.66541-1.22500	0.364925	0.88512	0.68348-1.14625	0.02029	0.32303	0.607	19.72242	22	0.60040	18.69818	21	0.60449
GCST90200431	23	0.534312	0.89408	0.63173-1.2654	0.655547	1.04859	0.85127-1.29164	0.561712	1.05118	0.88809-1.24422	0.920198	0.97805	0.63669-1.50243	0.730977	1.06534	0.74604-1.52131	0.02194	0.30826	0.046	35.05713	22	0.03822	33.32669	21	0.04272
GCST90199751	25	0.180335	1.21340	0.92224-1.5965	0.665314	1.03944	0.87235-1.23852	0.563133	1.03789	0.91496-1.17733	0.897569	0.98050	0.72882-1.31909	0.871293	1.02447	0.76707-1.36825	-0.01932	0.22292	0.371	25.59776	24	0.37388	23.96291	23	0.40586
GCST90200585	30	0.787584	0.96773	0.76403-1.2257	0.978505	0.99783	0.85206-1.16854	0.563218	1.03134	0.92888-1.14510	0.392645	0.86967	0.63443-1.19215	0.309221	1.15519	0.87904-1.51809	0.00961	0.56072	0.61	25.99248	29	0.62589	25.64580	28	0.59251
GCST90199706	22	0.165271	0.92029	0.82193-1.0304	0.561495	0.97601	0.89919-1.05939	0.56521	0.97895	0.91048-1.05257	0.4628	0.93752	0.79169-1.11022	0.479459	0.97045	0.89436-1.05302	0.01821	0.18375	0.366	24.53804	21	0.26773	22.41334	20	0.31851
GCST90200047	27	0.685562	0.91925	0.61444-1.3753	0.870988	0.98365	0.80614-1.20024	0.567693	0.94879	0.79225-1.13626	0.283112	0.75176	0.45131-1.25222	0.048794	1.42314	1.01849-1.98857	0.00403	0.86412	<0.001	63.99716	26	0.00005	63.92073	25	0.00003
GCST90200059	37	0.375695	0.86590	0.63223-1.1859	0.582181	0.96004	0.83025-1.11013	0.567707	0.96015	0.83513-1.10388	0.378992	1.13256	0.86119-1.48944	0.776331	0.97174	0.79854-1.18250	0.01393	0.47657	<0.001	83.33213	36	0.00001	82.11733	35	0.00001
GCST90199956	29	0.810869	1.02816	0.82082-1.2879	0.127665	1.12208	0.96753-1.30132	0.567777	1.03554	0.91862-1.16734	0.0800483	1.25546	0.98216-1.60480	0.0992072	1.17957	0.97564-1.42612	0.00133	0.94151	0.044	42.53045	28	0.03862	42.52181	27	0.02922
GCST90200676	22	0.613769	0.97201	0.87203-1.0834	0.652157	1.02160	0.93095-1.12107	0.567795	0.97906	0.91051-1.05278	0.611815	1.05405	0.86274-1.28778	0.769109	1.01299	0.93037-1.10295	0.00207	0.86049	0.475	20.68193	21	0.47851	20.64921	20	0.41803
GCST90200843	16	0.918755	1.01989	0.70332-1.4789	0.932104	1.00793	0.84051-1.20870	0.569285	0.95738	0.82404-1.11231	0.940553	0.98880	0.73899-1.32304	0.85253	1.02458	0.79662-1.31778	-0.01155	0.71929	0.159	20.25661	15	0.16231	20.06386	14	0.12814
GCST90199844	25	0.156373	1.13820	0.95724-1.3534	0.0736537	1.08873	0.99189-1.19501	0.569346	1.02996	0.93038-1.14020	0.439247	1.09128	0.87782-1.35665	0.0176161	1.10307	1.02293-1.18950	-0.02326	0.17959	<0.001	55.61888	24	0.00026	51.34194	23	0.00061
GCST90199869	19	0.0798482	1.42396	0.98175-2.0654	0.637488	1.05315	0.84908-1.30626	0.569583	1.05242	0.88250-1.25504	0.876272	0.96927	0.65795-1.42788	0.864877	0.96927	0.68001-1.38157	-0.03842	0.09266	0.088	26.21377	18	0.09497	22.08871	17	0.18133
GCST90200420	15	0.213629	1.28349	0.88294-1.8657	0.328644	0.89011	0.70470-1.12430	0.570053	0.95082	0.79896-1.13155	0.302013	0.82010	0.57059-1.17870	0.45185	0.87022	0.61197-1.23744	-0.04017	0.09917	0.703	11.06491	14	0.68093	7.91165	13	0.84931
GCST90200907	24	0.277475	0.82007	0.57840-1.1627	0.220887	1.09434	0.94725-1.26426	0.57097	1.05296	0.88083-1.25872	0.421606	1.11408	0.86008-1.44309	0.170319	1.09830	0.96457-1.25058	0.04204	0.12072	<0.001	78.66210	23	0.00000	70.33138	22	0.00000
GCST90200700	23	0.139163	1.08975	0.97664-1.2160	0.489258	1.02931	0.94838-1.11714	0.571048	1.02010	0.95223-1.09280	0.300924	1.10276	0.92021-1.32152	0.379851	1.03787	0.95684-1.12575	-0.01908	0.14382	0.568	21.95040	22	0.46285	19.64484	21	0.54385
GCST90200497	13	0.956606	0.98755	0.63529-1.5351	0.477516	0.92665	0.75097-1.14343	0.571238	0.95247	0.80473-1.12734	0.864363	0.97314	0.71680-1.32117	0.829989	0.96636	0.71189-1.31180	-0.00480	0.86411	0.276	15.17255	12	0.23214	15.13033	11	0.17661
GCST90199707	27	0.370587	0.88387	0.67786-1.1525	0.243566	0.90837	0.77288-1.06761	0.572054	0.96399	0.84882-1.09478	0.539664	0.90205	0.65171-1.24856	0.180207	0.84074	0.65681-1.07618	0.01095	0.47080	0.143	32.87348	26	0.16580	32.18316	25	0.15278
GCST90199768	20	0.79383	1.06329	0.67564-1.6734	0.215	0.85530	0.66805-1.09502	0.572068	1.06353	0.85893-1.31686	0.571503	0.88135	0.57336-1.35476	0.255691	0.83164	0.61099-1.13197	0.00003	0.99914	0.016	34.83318	19	0.01463	34.83318	18	0.00992
GCST90199687	25	0.914132	1.01274	0.80653-1.2717	0.521261	1.05407	0.89740-1.23808	0.572244	1.03500	0.91852-1.16626	0.65089	1.06573	0.81169-1.39928	0.634403	1.07156	0.80885-1.41960	0.00453	0.82664	0.172	29.74512	24	0.19334	29.68179	23	0.15876
GCST90200703	24	0.607292	1.04382	0.88840-1.2264	0.636636	1.02394	0.92821-1.12954	0.572788	1.03054	0.92824-1.14412	0.218414	0.85263	0.66605-1.09147	0.645618	1.02251	0.93110-1.12290	-0.00276	0.83728	0.059	39.13527	23	0.01917	39.05859	22	0.01390
GCST90200001	24	0.727006	1.06209	0.76057-1.4832	0.685841	0.96895	0.83164-1.12894	0.572842	1.04208	0.90297-1.20263	0.643803	0.93371	0.70083-1.24399	0.524241	1.05820	0.89147-1.25611	-0.00333	0.90226	0.002	48.16844	23	0.00159	48.13468	22	0.00104
GCST90200834	23	0.470548	1.08455	0.87344-1.3467	0.580338	1.04233	0.89987-1.20734	0.57303	1.03017	0.92900-1.14236	0.349058	1.13136	0.87862-1.45682	0.46496	1.07567	0.88753-1.30369	-0.00968	0.59981	0.209	27.75186	22	0.18405	27.38181	21	0.15857
GCST90200160	30	0.832061	1.02215	0.83635-1.2492	0.747558	0.97619	0.84296-1.13048	0.573835	1.02779	0.93414-1.13084	0.910712	0.98420	0.74692-1.29687	0.79103	0.97632	0.81904-1.16379	0.00089	0.95165	0.536	27.86401	29	0.52519	27.86026	28	0.47187
GCST90200035	32	0.214756	0.76555	0.50645-1.1572	0.551157	0.94965	0.80129-1.12548	0.574208	0.95249	0.80376-1.12875	0.353443	1.20346	0.81864-1.76919	0.414391	0.87403	0.63533-1.20243	0.02663	0.26500	<0.001	77.00154	31	0.00001	73.82639	30	0.00001
GCST90200558	27	0.753702	1.02730	0.86982-1.2133	0.786552	1.01905	0.88897-1.16815	0.574944	1.02809	0.93321-1.13262	0.905649	1.01305	0.81930-1.25261	0.991372	1.00094	0.84619-1.18398	0.00016	0.99118	1	10.10661	26	0.99779	10.10648	25	0.99636
GCST90200410	22	0.39093	1.11105	0.87804-1.4059	0.775767	0.97494	0.81875-1.16094	0.574945	1.03638	0.91469-1.17427	0.541503	0.91171	0.68089-1.22076	0.659798	0.94462	0.73561-1.21302	-0.01181	0.50206	0.499	20.47951	21	0.49110	20.01190	20	0.45719
GCST90200212	22	0.326225	0.86246	0.64655-1.1505	0.150544	0.87949	0.73824-1.04777	0.575886	0.96673	0.85864-1.08842	0.196097	0.80414	0.58394-1.10738	0.09273	0.81306	0.64582-1.02361	0.01827	0.40446	0.697	16.46265	21	0.74312	15.73725	20	0.73279
GCST90200183	25	0.115685	1.11875	0.97793-1.2798	0.24128	1.06381	0.95925-1.17977	0.575921	1.02558	0.93872-1.12046	0.142307	0.78494	0.57407-1.07325	0.219914	1.06726	0.96446-1.18102	-0.02126	0.11433	0.314	27.83446	24	0.26708	24.91605	23	0.35463
GCST90200028	33	0.51298	0.85573	0.53945-1.3574	0.86424	1.01605	0.84656-1.21947	0.576342	0.95863	0.82657-1.11179	0.159396	1.35682	0.89583-2.05504	0.245876	1.27325	0.85302-1.90049	0.01185	0.61365	0.005	56.21644	32	0.00514	55.74866	31	0.00414
GCST90200946	20	0.670419	1.08045	0.76096-1.5341	0.229684	0.87554	0.70483-1.08759	0.577632	0.95547	0.81393-1.12163	0.137485	0.75911	0.53580-1.07547	0.143001	0.80404	0.60782-1.06361	-0.01721	0.44835	0.211	23.74764	19	0.20601	22.98063	18	0.19134
GCST90200110	19	0.854943	0.95812	0.60983-1.5053	0.452949	0.91896	0.73697-1.14590	0.577657	0.95450	0.81018-1.12452	0.582617	0.88491	0.57667-1.35791	0.45739	0.86045	0.58382-1.26816	-0.00045	0.98609	0.296	20.39583	18	0.31098	20.39545	17	0.25450
GCST90200048	20	0.959619	1.00742	0.75968-1.3360	0.975116	1.00296	0.83290-1.20774	0.577769	1.03759	0.91117-1.18155	0.754699	1.04318	0.80325-1.35477	0.821201	1.02697	0.81792-1.28943	0.00439	0.81894	0.493	18.91267	19	0.46245	18.85615	18	0.40073
GCST90200750	19	0.896615	1.01803	0.78059-1.3277	0.758265	0.97090	0.80442-1.17182	0.577968	1.03842	0.90927-1.18592	0.170128	1.30197	0.90660-1.86978	0.513988	0.90936	0.68747-1.20286	0.00366	0.86654	0.132	23.97693	18	0.15579	23.93594	17	0.12119
GCST90199749	37	0.00393876	0.76073	0.63947-0.9050	0.341128	0.93152	0.80493-1.07802	0.578383	0.97181	0.87860-1.07492	0.894145	0.97919	0.71994-1.33181	0.351925	0.91146	0.75174-1.10513	0.03698	0.00226	0.235	40.95947	36	0.26193	30.09758	35	0.70369
GCST90200061	30	0.926635	0.98666	0.74323-1.3098	0.737438	1.02968	0.86786-1.22166	0.578422	1.03793	0.91022-1.18356	0.265274	1.20829	0.87175-1.67473	0.391072	1.13202	0.85629-1.49654	0.00742	0.69431	0.057	42.95899	29	0.04593	42.71842	28	0.03705
GCST90199765	20	0.357333	0.79415	0.49228-1.2811	0.324827	1.12499	0.88987-1.42223	0.578629	1.05761	0.86792-1.28875	0.691897	1.09441	0.70524-1.69832	0.631717	1.12819	0.69444-1.83285	0.04757	0.21502	0.006	37.21316	19	0.00746	34.08551	18	0.01229
GCST90200744	25	0.100372	0.77470	0.57837-1.0377	0.965463	0.99578	0.82219-1.20601	0.579618	1.03777	0.91018-1.18325	0.758105	1.06667	0.71066-1.60102	0.834507	1.03610	0.74556-1.43986	0.03632	0.03861	0.557	22.73378	24	0.53556	17.92031	23	0.76180
GCST90200440	24	0.928367	0.99409	0.87495-1.1295	0.528744	1.03348	0.93283-1.14498	0.580208	1.02756	0.93317-1.13150	0.460338	1.11866	0.83480-1.49904	0.471579	1.03899	0.93784-1.15104	0.00946	0.44147	0.214	30.87067	23	0.12600	30.03189	22	0.11769
GCST90200105	27	0.321521	1.12456	0.89574-1.4118	0.540887	1.04944	0.89905-1.22497	0.580273	1.03155	0.92401-1.15159	0.914039	1.01434	0.78526-1.31024	0.40775	1.06909	0.91503-1.24908	-0.01153	0.40267	0.235	31.36020	26	0.21513	30.47668	25	0.20694
GCST90200962	20	0.721942	0.91566	0.56787-1.4764	0.195617	1.12016	0.94329-1.33020	0.580593	1.04673	0.89018-1.23080	0.288579	1.21287	0.85773-1.71507	0.322225	1.16601	0.86710-1.56797	0.01847	0.56596	0.002	42.22704	19	0.00165	41.43978	18	0.00132
GCST90200414	23	0.337198	0.81809	0.54800-1.2213	0.727611	1.03636	0.84767-1.26706	0.580903	0.95829	0.82379-1.11477	0.670108	1.08742	0.74333-1.59079	0.723614	1.06109	0.76706-1.46784	0.01844	0.41226	0.246	26.73480	22	0.22147	25.87259	21	0.21135
GCST90199808	25	0.179087	1.14474	0.94554-1.3859	0.317734	1.07966	0.92894-1.25484	0.580964	0.96736	0.85984-1.08833	0.999522	1.00008	0.77692-1.28734	0.392691	1.08111	0.90699-1.28866	-0.02884	0.04577	0.156	31.01865	24	0.15325	25.98074	23	0.30178
GCST90199727	16	0.640638	1.11274	0.71747-1.7258	0.479072	1.08873	0.86037-1.37769	0.581051	1.04688	0.88966-1.23189	0.318304	1.20104	0.84820-1.70066	0.371706	1.15512	0.84982-1.57012	-0.00839	0.77352	0.918	8.17125	15	0.91673	8.08516	14	0.88484
GCST90199939	21	0.145356	0.73197	0.48931-1.0950	0.37966	0.90893	0.73453-1.12473	0.582122	0.95542	0.81216-1.12394	0.495112	0.86642	0.57822-1.29827	0.374269	0.84495	0.58753-1.21515	0.02835	0.17457	0.2	25.27663	20	0.19105	22.88090	19	0.24263
GCST90200884	25	0.427507	0.95767	0.86226-1.0636	0.575833	0.97173	0.87886-1.07442	0.583314	0.98000	0.91174-1.05336	0.558829	0.94461	0.78240-1.14044	0.569287	0.97589	0.89827-1.06023	0.00676	0.55896	0.884	16.75548	24	0.85890	16.40382	23	0.83744
GCST90200812	24	0.56927	1.09512	0.80463-1.4905	0.602397	0.95251	0.79318-1.14384	0.583703	0.96421	0.84635-1.09848	0.704354	0.93586	0.66735-1.31242	0.667469	0.94046	0.71330-1.23996	-0.01687	0.38130	0.558	21.47654	23	0.55201	20.67834	22	0.54069
GCST90200576	30	0.315426	0.91716	0.77703-1.0826	0.76185	0.98082	0.86536-1.11168	0.583707	0.97544	0.89241-1.06618	0.85661	1.02456	0.78932-1.32991	0.396387	0.92041	0.76203-1.11171	0.01188	0.39467	0.291	32.76200	29	0.28744	31.91032	28	0.27818
GCST90200713	17	0.871625	1.01805	0.82251-1.2601	0.909995	0.98870	0.81186-1.20405	0.585356	0.96559	0.85145-1.09503	0.576484	0.91258	0.66633-1.24982	0.925987	0.99030	0.80889-1.21241	-0.00916	0.55615	0.826	10.91556	16	0.81467	10.55313	15	0.78358
GCST90199908	26	0.899261	1.02648	0.68776-1.5320	0.503538	0.93762	0.77637-1.13237	0.585507	0.95872	0.82393-1.11556	0.789917	0.95705	0.69532-1.31732	0.546389	0.91203	0.67892-1.22516	-0.00968	0.72036	0.066	36.07388	25	0.07049	35.87775	24	0.05640
GCST90200056	29	0.510153	1.13040	0.78871-1.6201	0.577929	1.04603	0.89269-1.22570	0.585574	0.95208	0.79801-1.13589	0.369479	1.15657	0.84611-1.58095	0.65061	1.04939	0.85371-1.28992	-0.02508	0.29328	<0.001	91.58675	28	0.00000	87.84882	27	0.00000
GCST90200430	22	0.31769	1.21816	0.83520-1.7767	0.679345	0.95866	0.78475-1.17112	0.586909	1.03984	0.90316-1.19719	0.77446	0.94844	0.66340-1.35596	0.543942	0.89913	0.64138-1.26048	-0.01755	0.38613	0.619	18.32996	21	0.62804	17.54492	20	0.61736
GCST90200652	22	0.327913	1.09643	0.91589-1.3126	0.567243	1.03921	0.91092-1.18556	0.587432	1.02618	0.93472-1.12659	0.872824	0.98184	0.78666-1.22546	0.681287	1.02892	0.89972-1.17669	-0.01223	0.40759	0.494	21.25066	21	0.44373	20.51655	20	0.42606
GCST90200443	23	0.843668	0.95431	0.60298-1.5103	0.891506	0.98564	0.80061-1.21342	0.589862	1.04191	0.89743-1.20964	0.749206	0.93853	0.63920-1.37803	0.609716	0.91455	0.65222-1.28239	0.00866	0.69577	0.649	18.87721	22	0.65290	18.72003	21	0.60309
GCST90201000	23	0.614906	0.94305	0.75301-1.1811	0.723525	0.97553	0.85042-1.11905	0.589994	0.97038	0.86985-1.08253	0.786157	0.96664	0.75875-1.23149	0.709161	0.97327	0.84569-1.12011	0.00441	0.77721	0.224	28.35471	22	0.16422	28.24422	21	0.13336
GCST90200952	19	0.121932	1.19952	0.96357-1.4932	0.345395	0.92862	0.79621-1.08304	0.590665	0.97119	0.87305-1.08036	0.39405	0.87730	0.65395-1.17694	0.438884	0.88521	0.65454-1.19717	-0.04151	0.04512	0.635	14.78275	18	0.67683	10.10635	17	0.89909
GCST90200619	20	0.614833	0.91869	0.66404-1.2710	0.776246	0.97157	0.79632-1.18539	0.591276	0.95971	0.82593-1.11515	0.78271	0.95616	0.69844-1.30899	0.860873	0.96980	0.69143-1.36025	0.00555	0.76953	0.938	10.48471	19	0.93996	10.39623	18	0.91820
GCST90200198	20	0.968868	0.99457	0.75956-1.3023	0.580991	0.95058	0.79402-1.13802	0.591377	0.96731	0.85678-1.09210	0.416837	1.12552	0.85131-1.48807	0.600555	0.94605	0.77136-1.16030	-0.00492	0.82299	0.512	18.49104	19	0.48989	18.43826	18	0.42715
GCST90200482	27	0.294721	1.13521	0.89994-1.4320	0.319868	1.09100	0.91896-1.29524	0.592163	1.03347	0.91618-1.16578	0.376579	1.15431	0.84439-1.57797	0.478974	1.10606	0.84008-1.45625	-0.01504	0.36287	0.529	24.90466	26	0.52438	24.04564	25	0.51674
GCST90200347	26	0.539402	0.91371	0.68776-1.2139	0.643616	0.95852	0.80105-1.14695	0.592388	0.96468	0.84569-1.10041	0.842605	0.96778	0.70283-1.33262	0.764158	0.95485	0.70843-1.28701	0.00656	0.67631	0.539	23.94307	25	0.52266	23.76444	24	0.47513
GCST90200948	20	0.152557	0.79490	0.58818-1.0743	0.838046	0.98413	0.84418-1.14729	0.592495	0.96547	0.84889-1.09806	0.97982	1.00318	0.78686-1.27896	0.987153	0.99809	0.79301-1.25620	0.03242	0.18090	0.154	25.32044	19	0.15026	22.85980	18	0.19604
GCST90199961	33	0.997346	1.00025	0.86226-1.1603	0.509874	0.95935	0.84795-1.08538	0.592942	1.02258	0.94221-1.10979	0.912279	0.98805	0.79913-1.22163	0.608364	0.96806	0.85607-1.09470	0.00382	0.72925	0.802	24.99758	32	0.80613	24.87559	31	0.77326
GCST90199922	30	0.725232	1.05013	0.80161-1.3757	0.796685	1.02153	0.86869-1.20127	0.593568	1.03367	0.91529-1.16736	0.187243	1.29095	0.89118-1.87003	0.85181	1.03038	0.75483-1.40651	-0.00220	0.89828	0.126	37.81611	29	0.12648	37.79364	28	0.10237
GCST90199815	37	0.46134	1.10588	0.84858-1.4412	0.356299	0.93025	0.79777-1.08473	0.594036	0.97282	0.87907-1.07657	0.726295	0.94702	0.69990-1.28141	0.506599	0.92786	0.74554-1.15476	-0.01752	0.31155	0.42	37.08333	36	0.41883	35.99889	35	0.42157
GCST90199977	23	0.345492	0.90831	0.74715-1.1042	0.404342	0.93511	0.79870-1.09483	0.598976	0.97014	0.86648-1.08620	0.443355	0.88865	0.66070-1.19525	0.267588	0.90836	0.76972-1.07198	0.01238	0.42512	0.325	25.36574	22	0.27991	24.59100	21	0.26531
GCST90200956	20	0.837953	1.03225	0.76481-1.3932	0.823924	1.02190	0.84436-1.23676	0.599518	1.03556	0.90894-1.17982	0.405958	0.86898	0.62857-1.20133	0.404054	0.89020	0.68151-1.16278	0.00047	0.98175	0.593	16.99794	19	0.59001	16.99741	18	0.52328
GCST90200037	20	0.997164	0.99910	0.61211-1.6308	0.208729	1.12433	0.93657-1.34974	0.600193	1.05759	0.85780-1.30391	0.750593	1.05305	0.76917-1.44168	0.306162	1.10176	0.91970-1.31987	0.00738	0.80298	<0.001	53.43262	19	0.00004	53.24298	18	0.00002
GCST90200096	18	0.859184	0.97420	0.73322-1.2944	0.93229	1.00668	0.86339-1.17375	0.601153	0.97021	0.86621-1.08670	0.811282	0.96912	0.75212-1.24873	0.993451	0.99903	0.79567-1.25437	-0.00072	0.97578	0.878	10.45830	17	0.88330	10.45735	16	0.84168
GCST90199962	26	0.720169	1.02923	0.88075-1.2027	0.352571	1.05821	0.93922-1.19228	0.601513	1.02244	0.94074-1.11122	0.118645	1.18778	0.96403-1.46347	0.176833	1.11494	0.95635-1.29984	-0.00131	0.92227	0.527	23.75926	25	0.53332	23.74953	24	0.47599
GCST90200310	30	0.51093	1.02960	0.94488-1.1219	0.723141	1.01404	0.93876-1.09536	0.602468	1.01719	0.95400-1.08456	0.861297	0.97951	0.77810-1.23305	0.938389	1.00283	0.93414-1.07656	-0.00354	0.68030	0.968	17.59252	29	0.95216	17.41915	28	0.93984
GCST90200837	30	0.220843	0.91864	0.80437-1.0491	0.641717	0.97433	0.87324-1.08713	0.603696	0.97992	0.90768-1.05791	0.41032	0.92394	0.76743-1.11237	0.610401	0.96179	0.82926-1.11550	0.01468	0.25333	0.628	26.07457	29	0.62150	24.71429	28	0.64334
GCST90200629	28	0.924749	0.99130	0.82836-1.1863	0.70996	1.02702	0.89241-1.18193	0.605416	0.97531	0.88706-1.07234	0.932342	1.00956	0.81209-1.25506	0.815688	1.01792	0.87797-1.18018	-0.00258	0.83605	0.564	25.36502	27	0.55401	25.32132	26	0.50085
GCST90200894	20	0.7587	0.96444	0.76815-1.2109	0.918731	0.99221	0.85377-1.15310	0.605877	0.97114	0.86888-1.08542	0.900631	0.98378	0.76371-1.26727	0.722325	1.04110	0.83643-1.29585	0.00119	0.94578	0.478	19.40044	19	0.43143	19.39532	18	0.36787
GCST90199982	21	0.933355	1.01382	0.73813-1.3925	0.461741	1.07716	0.88372-1.31293	0.605912	1.03611	0.90548-1.18558	0.660338	1.10153	0.72022-1.68474	0.27516	1.25520	0.84386-1.86703	0.00299	0.88300	0.426	19.91944	20	0.46298	19.89615	19	0.40085
GCST90199742	29	0.0980582	0.82947	0.66977-1.0272	0.66153	1.03374	0.89104-1.19928	0.606283	1.03272	0.91371-1.16722	0.376492	1.13569	0.86047-1.49893	0.956389	1.00611	0.81029-1.24926	0.03400	0.02522	0.059	41.35445	28	0.04982	34.23503	27	0.15932
GCST90200902	26	0.39784	1.10475	0.88056-1.3860	0.216596	1.09302	0.94919-1.25865	0.606385	1.03002	0.92041-1.15268	0.275701	0.83037	0.59882-1.15147	0.259942	1.08471	0.94464-1.24554	-0.01127	0.49099	0.062	37.74812	25	0.04895	36.99399	24	0.04382
GCST90199692	24	0.0340446	1.31024	1.03654-1.6562	0.84639	1.01640	0.86216-1.19823	0.606646	1.03563	0.90641-1.18328	0.696801	0.94033	0.69270-1.27648	0.941792	1.00915	0.79239-1.28521	-0.04006	0.03089	0.053	34.58017	23	0.05722	27.84696	22	0.18081
GCST90199641	15	0.404112	1.16688	0.82165-1.6572	0.988206	1.00178	0.79175-1.26752	0.606944	1.04568	0.88204-1.23968	0.953966	0.98736	0.64589-1.50933	0.989628	1.00230	0.71327-1.40845	-0.01653	0.49334	0.256	16.74679	14	0.26992	16.13036	13	0.24216
GCST90200229	20	0.518836	1.14907	0.75963-1.7382	0.8859	0.98580	0.81091-1.19841	0.607537	0.95650	0.80719-1.13343	0.682916	0.93676	0.68797-1.27552	0.804929	1.02810	0.82764-1.27712	-0.02635	0.35327	0.019	34.82860	19	0.01465	33.15607	18	0.01598
GCST90199942	23	0.632811	0.94867	0.76665-1.1739	0.873546	0.98595	0.82827-1.17365	0.609251	0.96864	0.85722-1.09453	0.798887	0.96147	0.71326-1.29606	0.792959	0.96958	0.77200-1.21773	0.00397	0.81727	0.964	11.10496	22	0.97322	11.05021	21	0.96180
GCST90200993	18	0.644594	1.09595	0.74800-1.6058	0.486027	0.92902	0.75521-1.14284	0.609833	0.95337	0.79360-1.14530	0.64692	0.91947	0.64605-1.30860	0.724878	0.94351	0.68613-1.29742	-0.02106	0.42549	0.081	25.32804	17	0.08760	24.31184	16	0.08291
GCST90200228	18	0.532573	0.86866	0.56358-1.3389	0.89225	0.98678	0.81396-1.19630	0.610211	0.96426	0.83833-1.10910	0.723795	0.94696	0.70343-1.27480	0.768348	0.96103	0.74076-1.24679	0.01322	0.62305	0.51	17.11937	17	0.44631	16.85473	16	0.39506
GCST90200416	19	0.232303	1.18505	0.90586-1.5503	0.0976323	1.13145	0.97762-1.30949	0.610405	1.03368	0.91001-1.17414	0.692993	1.06612	0.77976-1.45766	0.134588	1.12732	0.97037-1.30965	-0.02372	0.27416	0.12	26.15641	18	0.09623	24.32899	17	0.11077
GCST90200098	29	0.347233	0.86818	0.64988-1.1598	0.645957	1.03422	0.89592-1.19386	0.61048	0.96407	0.83746-1.10982	0.559237	1.07153	0.85213-1.34742	0.561829	1.04377	0.90469-1.20422	0.01599	0.42339	<0.001	60.50013	28	0.00035	59.05486	27	0.00035
GCST90200883	25	0.756346	0.96652	0.78144-1.1954	0.633886	0.96400	0.82899-1.12100	0.610499	0.97216	0.87207-1.08374	0.605021	1.07376	0.82284-1.40121	0.545184	0.93463	0.75314-1.15986	0.00093	0.95077	0.948	14.16694	24	0.94279	14.16305	23	0.92211
GCST90200674	37	0.200795	0.94985	0.87916-1.0262	0.171014	0.95404	0.89190-1.02052	0.612461	0.98379	0.92353-1.04799	0.792994	1.02653	0.84543-1.24642	0.184194	0.95345	0.88988-1.02157	0.01331	0.14378	0.168	46.28908	36	0.11700	43.50924	35	0.15317
GCST90200941	16	0.582112	0.94197	0.76507-1.1598	0.631929	0.96279	0.82441-1.12440	0.613509	0.96620	0.84550-1.10413	0.194339	0.82231	0.62011-1.09045	0.57512	0.95414	0.81260-1.12034	0.00477	0.75431	0.225	20.03217	15	0.17070	19.88745	14	0.13373
GCST90200027	27	0.658732	1.04720	0.85546-1.2819	0.528042	1.04732	0.90720-1.20909	0.613705	1.02925	0.92026-1.15114	0.998711	1.00021	0.78106-1.28084	0.584916	1.04330	0.89778-1.21242	-0.00341	0.84080	0.197	32.64429	26	0.17267	32.59058	25	0.14162
GCST90200221	30	0.23995	0.86794	0.68876-1.0937	0.279817	0.92748	0.80911-1.06317	0.614405	0.97450	0.88132-1.07753	0.664169	0.94675	0.74139-1.20900	0.462255	0.92687	0.75903-1.13184	0.01907	0.28535	0.315	32.31374	29	0.30627	31.00026	28	0.31707
GCST90200439	15	0.543212	0.94097	0.77735-1.1390	0.979462	0.99809	0.86299-1.15434	0.61529	0.96787	0.85212-1.09934	0.633514	1.06828	0.81909-1.39330	0.96739	1.00275	0.88092-1.14143	0.00705	0.69677	0.311	17.94104	14	0.20948	17.72458	13	0.16826
GCST90200979	25	0.131335	0.89427	0.77745-1.0286	0.244141	0.93487	0.83470-1.04706	0.615953	0.97735	0.89366-1.06888	0.500167	0.91826	0.71935-1.17218	0.204664	0.93279	0.84016-1.03564	0.01798	0.12647	0.417	25.68424	24	0.36938	23.15312	23	0.45186
GCST90199728	13	0.235495	0.75563	0.48781-1.1705	0.336927	1.12431	0.88516-1.42806	0.616704	1.04658	0.87569-1.25081	0.410815	1.18758	0.79971-1.76359	0.389324	1.16746	0.83116-1.63984	0.03868	0.13848	0.638	10.25828	12	0.59331	7.70654	11	0.73933
GCST90199817	23	0.775633	1.03621	0.81391-1.3192	0.864856	0.98786	0.85826-1.13704	0.617193	1.02622	0.92719-1.13583	0.907722	1.01344	0.81079-1.26673	0.752382	0.97542	0.83729-1.13633	-0.00164	0.93175	0.58	20.07544	22	0.57832	20.06792	21	0.51696
GCST90200808	17	0.360924	0.87272	0.65752-1.1584	0.633317	0.95241	0.77951-1.16366	0.617701	0.96235	0.82772-1.11888	0.797066	0.95939	0.70312-1.30907	0.816021	0.96499	0.71824-1.29650	0.01556	0.43655	0.925	9.01944	16	0.91261	8.38044	15	0.90763
GCST90199934	19	0.69798	0.92348	0.62195-1.3712	0.857312	1.01967	0.82459-1.26090	0.617929	1.04813	0.87136-1.26076	0.705808	0.93815	0.67698-1.30007	0.987484	1.00220	0.76432-1.31412	0.01538	0.48562	0.022	33.61325	18	0.01405	32.63769	17	0.01252
GCST90200573	21	0.84296	0.97051	0.72467-1.2997	0.457611	1.06200	0.90612-1.24471	0.618532	1.03013	0.91652-1.15783	0.247579	1.19244	0.89259-1.59301	0.34507	1.12666	0.88474-1.43474	0.00966	0.66614	0.234	24.92233	20	0.20442	24.67291	19	0.17159
GCST90199705	21	0.729504	0.96974	0.81681-1.1513	0.737242	0.97950	0.86785-1.10551	0.619621	1.02354	0.93369-1.12205	0.816578	0.97388	0.78096-1.21444	0.672243	0.97388	0.86303-1.09896	0.01135	0.47212	0.369	21.73659	20	0.35497	21.13778	19	0.32924
GCST90200013	19	0.56157	1.14526	0.73100-1.7943	0.383656	1.10468	0.88300-1.38201	0.62031	1.05130	0.86251-1.28142	0.36088	1.25901	0.77788-2.03773	0.198157	1.24203	0.90375-1.70692	-0.00990	0.68062	0.002	39.87114	18	0.00217	39.46402	17	0.00154
GCST90199786	30	0.298197	0.88295	0.70141-1.1115	0.125239	0.88144	0.75011-1.03576	0.620574	0.97189	0.86813-1.08805	0.274083	0.84782	0.63424-1.13333	0.157699	0.84410	0.67131-1.06137	0.01340	0.35639	0.718	24.11499	29	0.72324	23.23561	28	0.72116
GCST90200526	19	0.541827	0.95476	0.82527-1.1046	0.83063	0.98726	0.87783-1.11033	0.622082	0.97419	0.87800-1.08093	0.40405	0.88727	0.67439-1.16735	0.77382	0.98427	0.88480-1.09491	0.00500	0.69640	0.253	24.06401	18	0.15294	23.84310	17	0.12376
GCST90199633	27	0.908274	1.00873	0.87139-1.1677	0.751415	0.97925	0.86011-1.11489	0.622623	1.02253	0.93571-1.11740	0.907046	0.98677	0.79073-1.23140	0.658783	0.97126	0.85459-1.10384	0.00305	0.82088	0.962	14.79816	26	0.96091	14.74581	25	0.94712
GCST90200772	33	0.898903	0.98437	0.77351-1.2527	0.481708	0.94779	0.81627-1.10050	0.623569	1.02647	0.92477-1.13935	0.425554	0.89586	0.68591-1.17008	0.210986	0.85098	0.66423-1.09026	0.00581	0.70821	0.729	26.14476	32	0.75717	26.00209	31	0.72122
GCST90200124	23	0.904489	0.97293	0.62475-1.5151	0.635071	1.05597	0.84328-1.32232	0.623921	1.05245	0.85792-1.29110	0.929756	0.98301	0.67449-1.43266	0.58697	1.08090	0.81974-1.42525	0.00920	0.69755	0.002	45.33646	22	0.00240	45.00378	21	0.00173
GCST90200621	27	0.558864	1.07032	0.85482-1.3402	0.0740304	1.15273	0.98628-1.34726	0.623936	1.02956	0.91636-1.15675	0.789438	0.95862	0.70520-1.30310	0.296	1.10098	0.92257-1.31390	-0.00579	0.69390	0.167	32.30475	26	0.18324	32.10120	25	0.15510
GCST90200599	20	0.13872	1.21278	0.95014-1.5480	0.12334	1.13498	0.96615-1.33332	0.624071	1.03796	0.89427-1.20474	0.700918	1.05375	0.80994-1.37093	0.145925	1.13903	0.96262-1.34777	-0.02831	0.13920	0.02	36.47231	19	0.00923	32.19094	18	0.02087
GCST90199902	18	0.439297	1.10614	0.86208-1.4193	0.181464	1.12672	0.94583-1.34220	0.624141	1.02995	0.91528-1.15898	0.167069	1.25997	0.92063-1.72438	0.159235	1.18845	0.94440-1.49557	-0.01080	0.53097	0.354	17.56594	17	0.41671	17.12692	16	0.37743
GCST90199916	28	0.541901	1.03631	0.92549-1.1604	0.731234	0.98100	0.87926-1.09451	0.624551	1.01964	0.94323-1.10224	0.32973	1.10916	0.90395-1.36097	0.887076	0.99366	0.91092-1.08392	-0.00447	0.69726	0.238	32.56045	27	0.21196	32.36782	26	0.18124
GCST90200117	25	0.858414	0.97683	0.75717-1.2602	0.536706	0.94973	0.80637-1.11858	0.624586	0.96986	0.85798-1.09633	0.975823	0.99600	0.77088-1.28688	0.711702	0.97028	0.82839-1.13648	-0.00109	0.95013	0.07	36.34526	24	0.05079	36.33894	23	0.03808
GCST90199623	23	0.5612	0.93981	0.76481-1.1549	0.470785	0.94925	0.82396-1.09359	0.624592	0.97579	0.88455-1.07644	0.498897	0.92709	0.74714-1.15038	0.519238	0.93396	0.76129-1.14580	0.00651	0.68800	0.526	21.44636	22	0.49332	21.27838	21	0.44206
GCST90200296	22	0.911692	0.98698	0.78528-1.2405	0.726576	1.03043	0.87106-1.21897	0.625743	0.97137	0.86436-1.09163	0.721172	1.05315	0.79547-1.39430	0.608932	1.06044	0.84977-1.32334	-0.00263	0.87528	0.863	14.36794	21	0.85328	14.34267	20	0.81271
GCST90200405	28	0.82688	1.02713	0.80998-1.3025	0.849705	0.98360	0.82901-1.16703	0.626898	1.02981	0.91478-1.15930	0.63804	0.92253	0.66180-1.28598	0.444472	0.90889	0.71404-1.15691	0.00036	0.98030	0.284	31.28320	27	0.25967	31.28245	26	0.21792
GCST90200598	17	0.974023	0.99502	0.74026-1.3374	0.589034	1.05252	0.87413-1.26732	0.628723	1.03557	0.89877-1.19318	0.456594	1.12116	0.83575-1.50403	0.508901	1.10361	0.82912-1.46896	0.00555	0.76711	0.996	5.28105	16	0.99417	5.19010	15	0.99039
GCST90200280	26	0.562107	1.03986	0.91281-1.1846	0.921111	1.00534	0.90480-1.11705	0.629015	0.97781	0.89270-1.07102	0.704818	0.95083	0.73469-1.23056	0.976748	1.00151	0.90604-1.10703	-0.01861	0.21323	0.319	29.48176	25	0.24428	27.60131	24	0.27721
GCST90200705	42	0.991865	0.99953	0.91401-1.0931	0.413449	0.96575	0.88838-1.04987	0.629537	0.98469	0.92487-1.04839	0.692235	1.03993	0.85782-1.26070	0.547045	0.97456	0.89680-1.05908	-0.00456	0.64528	0.184	49.22191	41	0.17721	48.95858	40	0.15658
GCST90200850	27	0.355796	1.15274	0.85729-1.5500	0.657155	1.04158	0.87010-1.24685	0.630668	1.03389	0.90254-1.18436	0.908336	1.01980	0.73281-1.41918	0.789648	1.04005	0.78170-1.38378	-0.01419	0.42444	0.245	30.98207	26	0.22894	30.18590	25	0.21740
GCST90200466	25	0.553405	0.89019	0.60935-1.3005	0.308241	0.90722	0.75226-1.09410	0.630931	0.96009	0.81311-1.13364	0.241031	0.78008	0.52034-1.16949	0.0965602	0.70404	0.47303-1.04788	0.01028	0.66640	0.002	45.91938	24	0.00453	45.54176	23	0.00341
GCST90200004	23	0.810172	1.02876	0.81864-1.2928	0.562151	1.05718	0.87598-1.27586	0.631099	1.03034	0.91200-1.16404	0.415862	1.14282	0.83357-1.56681	0.408172	1.09323	0.88865-1.34490	0.00023	0.98759	0.347	24.40023	22	0.32661	24.39994	21	0.27409
GCST90199893	21	0.757496	1.02187	0.89250-1.1700	0.784197	0.98487	0.88307-1.09841	0.631244	0.97997	0.90224-1.06439	0.719365	0.95443	0.74266-1.22658	0.711642	0.98270	0.89702-1.07656	-0.00939	0.45335	0.847	14.38492	20	0.81046	13.79885	19	0.79529
GCST90200016	23	0.811758	0.98107	0.83994-1.1459	0.947255	0.99517	0.86230-1.14852	0.63193	1.02419	0.92877-1.12941	0.985409	1.00215	0.79847-1.25778	0.862657	0.98697	0.85213-1.14314	0.00816	0.49241	0.955	12.76181	22	0.93959	12.27364	21	0.93193
GCST90200165	22	0.320903	1.07633	0.93418-1.2401	0.2745	1.06634	0.95030-1.19656	0.633228	1.02121	0.93687-1.11313	0.2703	1.17023	0.89143-1.53621	0.255637	1.06605	0.95762-1.18676	-0.01205	0.37020	0.733	15.30374	21	0.80741	14.46333	20	0.80625
GCST90200295	28	0.899732	0.98541	0.78577-1.2358	0.225175	1.11241	0.93648-1.32140	0.633835	1.03108	0.90906-1.16948	0.187384	1.26036	0.90132-1.76242	0.164793	1.20519	0.93281-1.55711	0.00726	0.63863	0.083	38.14349	27	0.07562	37.81510	26	0.06300
GCST90199868	24	0.95762	1.00720	0.77542-1.3082	0.374086	1.06096	0.93118-1.20882	0.635046	1.03353	0.90193-1.18433	0.707041	1.05276	0.80781-1.37199	0.344948	1.06620	0.93595-1.21457	0.00584	0.82142	0.004	46.24539	23	0.00279	46.13597	22	0.00190
GCST90199715	22	0.207924	1.30045	0.87550-1.9316	0.313101	1.11434	0.90294-1.37524	0.635285	1.03708	0.89222-1.20546	0.655867	1.09503	0.73873-1.62317	0.497778	1.12581	0.80402-1.57639	-0.02359	0.23961	0.663	17.66823	21	0.66989	16.19913	20	0.70420
GCST90200628	28	0.524859	1.05183	0.90201-1.2265	0.920372	1.00646	0.88710-1.14188	0.637798	0.97827	0.89276-1.07197	0.514478	0.92627	0.73798-1.16260	0.901652	1.00819	0.88689-1.14609	-0.01479	0.26175	0.22	31.74418	27	0.24169	30.21480	26	0.25881
GCST90200998	22	0.335614	1.13852	0.87986-1.4732	0.137949	1.14658	0.95701-1.37371	0.639597	1.03260	0.90285-1.18101	0.570331	1.09463	0.80500-1.48847	0.287975	1.13571	0.90345-1.42769	-0.01757	0.39358	0.283	23.94893	21	0.29554	23.07185	20	0.28528
GCST90200043	23	0.953305	0.98796	0.66183-1.4748	0.375943	1.08321	0.90755-1.29286	0.64107	1.03684	0.89054-1.20717	0.32168	1.17004	0.86368-1.58508	0.904318	1.01345	0.81712-1.25694	0.00706	0.80019	0.012	40.02852	22	0.01073	39.90367	21	0.00764
GCST90200091	20	0.310297	0.87578	0.68274-1.1234	0.300302	1.09511	0.92213-1.30055	0.641497	1.03034	0.90852-1.16851	0.48569	1.11725	0.82305-1.51659	0.415823	1.13270	0.84452-1.51924	0.02525	0.15549	0.493	18.28699	19	0.50335	16.08904	18	0.58633
GCST90200254	13	0.240049	0.91274	0.79026-1.0542	0.490547	0.95499	0.83780-1.08857	0.641803	1.03191	0.90399-1.17792	0.891868	0.97873	0.72250-1.32581	0.506655	0.95672	0.84289-1.08593	0.03264	0.02633	0.224	18.48483	12	0.10174	11.57039	11	0.39679
GCST90199785	24	0.945358	1.00711	0.82432-1.2304	0.789757	0.98244	0.86250-1.11907	0.642321	1.02638	0.91957-1.14561	0.435452	0.91573	0.73681-1.13809	0.800254	1.01836	0.88593-1.17058	0.00354	0.82482	0.072	34.95098	23	0.05260	34.87145	22	0.03996
GCST90199967	20	0.0949449	0.81483	0.64889-1.0232	0.339468	0.91121	0.75293-1.10275	0.643124	0.96727	0.84025-1.11349	0.349718	0.85760	0.62648-1.17400	0.181672	0.87728	0.72905-1.05566	0.02621	0.08534	0.341	21.19468	19	0.32614	17.88012	18	0.46358
GCST90200479	26	0.4437	1.09160	0.87553-1.3610	0.703838	0.96886	0.82305-1.14050	0.643475	0.97431	0.87266-1.08781	0.731551	0.95307	0.72642-1.25044	0.736587	0.96730	0.79867-1.17154	-0.01809	0.25616	0.276	28.67199	25	0.27786	27.14171	24	0.29789
GCST90201004	18	0.738418	0.87518	0.40564-1.8883	0.745873	1.03937	0.82292-1.31274	0.643788	0.95292	0.77675-1.16904	0.360646	1.22202	0.80428-1.85674	0.626497	1.07861	0.79965-1.45488	0.00963	0.82445	0.002	38.88069	17	0.00186	38.75752	16	0.00118
GCST90200406	18	0.276337	0.78801	0.52072-1.1925	0.507895	1.07568	0.86676-1.33496	0.644706	1.03668	0.88950-1.20821	0.318108	1.23433	0.82642-1.84359	0.45428	1.13451	0.82137-1.56702	0.03497	0.18224	0.432	17.29567	17	0.43451	15.35116	16	0.49908
GCST90199660	27	0.806894	0.97141	0.77169-1.2228	0.412398	1.05632	0.92661-1.20418	0.645887	1.03043	0.90674-1.17099	0.20386	1.15977	0.92805-1.44933	0.69473	1.02571	0.90485-1.16270	0.01000	0.54898	0.001	58.66934	26	0.00025	57.81576	25	0.00021
GCST90200529	17	0.73526	1.06366	0.74871-1.5111	0.293531	1.11099	0.91289-1.35208	0.647732	1.03430	0.89500-1.19528	0.449526	1.13710	0.82171-1.57355	0.369918	1.13311	0.86891-1.47766	-0.00406	0.86614	0.87	9.69513	16	0.88206	9.66572	15	0.84022
GCST90200690	32	0.90496	1.00614	0.91079-1.1115	0.544734	1.02398	0.94840-1.10558	0.649081	0.98446	0.92025-1.05316	0.170281	0.84517	0.66827-1.06890	0.654578	1.01830	0.94125-1.10167	-0.00614	0.56076	0.21	37.94148	31	0.18232	37.50880	30	0.16277
GCST90200314	32	0.82048	1.03175	0.78951-1.3483	0.863932	1.01511	0.85512-1.20502	0.649662	1.02934	0.90860-1.16612	0.783088	0.94788	0.64965-1.38303	0.965087	1.00756	0.72117-1.40767	-0.00026	0.98460	0.262	35.31810	31	0.27137	35.31766	30	0.23127
GCST90200751	20	0.844622	1.03851	0.71557-1.5072	0.595757	1.05790	0.85928-1.30244	0.650376	0.96770	0.83962-1.11532	0.622779	1.10164	0.75380-1.60999	0.599114	1.10164	0.77252-1.57098	-0.00806	0.69245	0.781	14.18866	19	0.77258	14.02710	18	0.72732
GCST90199813	36	0.271969	1.11087	0.92367-1.3360	0.447344	0.94751	0.82450-1.08889	0.650906	0.97471	0.87235-1.08908	0.579626	1.08434	0.81638-1.44026	0.725742	0.97631	0.85480-1.11508	-0.02227	0.09588	0.04	52.49381	35	0.02902	48.32478	34	0.05281
GCST90199736	22	0.947326	1.00900	0.77600-1.3120	0.206192	0.90894	0.78386-1.05397	0.652428	0.97328	0.86508-1.09502	0.352802	0.87700	0.66900-1.14967	0.325981	0.91937	0.78044-1.08303	-0.00530	0.76514	0.19	27.40781	21	0.15776	27.28270	20	0.12750
GCST90200858	33	0.79121	1.03061	0.82601-1.2859	0.669579	1.03518	0.88316-1.21338	0.652765	1.02611	0.91713-1.14804	0.547943	0.92125	0.70697-1.20047	0.67346	1.05219	0.83229-1.33019	-0.00060	0.96442	0.895	23.18911	32	0.87225	23.18708	31	0.84226
GCST90199993	26	0.808593	1.03543	0.78362-1.3682	0.889619	1.01127	0.86324-1.18468	0.653123	1.02696	0.91446-1.15331	0.903437	0.98376	0.75709-1.27828	0.760463	1.03730	0.82179-1.30934	-0.00104	0.94985	0.815	18.81522	25	0.80589	18.81118	24	0.76198
GCST90200755	20	0.189852	0.82149	0.61909-1.0901	0.782335	1.02154	0.87822-1.18824	0.653173	0.97394	0.86797-1.09284	0.622765	1.06929	0.82236-1.39036	0.673795	1.05775	0.81771-1.36826	0.02743	0.21435	0.214	23.14465	19	0.23103	21.19390	18	0.26974
GCST90200861	29	0.875266	1.01543	0.84021-1.2272	0.820386	1.01667	0.88145-1.17263	0.654619	1.02345	0.92463-1.13282	0.72591	0.95685	0.74958-1.22143	0.852925	1.01793	0.84500-1.22626	0.00124	0.92340	0.282	32.12705	28	0.26937	32.11584	27	0.22782
GCST90200368	17	0.713639	0.93747	0.66833-1.3150	0.483892	0.92289	0.73718-1.15538	0.654765	0.96479	0.82452-1.12892	0.34056	0.81436	0.54060-1.22676	0.498557	0.89134	0.64366-1.23434	0.00352	0.85220	0.439	16.35251	16	0.42864	16.31344	15	0.36153
GCST90201015	32	0.522888	0.97231	0.89295-1.0587	0.590388	0.97343	0.88250-1.07373	0.65615	1.01433	0.95273-1.07992	0.0413719	1.24052	1.01718-1.51289	0.940915	0.99718	0.92606-1.07377	0.01239	0.16060	0.588	28.68907	31	0.58542	26.61936	30	0.64318
GCST90199745	23	0.996722	1.00052	0.78325-1.2781	0.240388	1.11905	0.92746-1.35022	0.657161	1.02885	0.90741-1.16655	0.993064	0.99853	0.71868-1.38734	0.470712	1.10364	0.84813-1.43613	0.00382	0.79576	0.486	21.84177	22	0.46937	21.77052	21	0.41284
GCST90200773	28	0.538995	0.90097	0.64883-1.2511	0.488084	1.06452	0.89207-1.27030	0.660897	1.03304	0.89341-1.19449	0.189554	1.30771	0.88477-1.93282	0.844443	1.03109	0.76165-1.39584	0.01743	0.37055	0.005	47.09836	27	0.00966	45.64082	26	0.01000
GCST90199653	16	0.81205	1.04630	0.72552-1.5089	0.44553	1.08754	0.87662-1.34920	0.661625	1.03642	0.88302-1.21647	0.51818	1.12166	0.79832-1.57596	0.391566	1.14139	0.85082-1.53121	-0.00119	0.95572	0.984	6.10488	15	0.97793	6.10169	14	0.96386
GCST90199958	30	0.456522	0.86312	0.58901-1.2648	0.885479	1.01394	0.83980-1.22420	0.66278	0.96662	0.82983-1.12596	0.735017	1.06451	0.74375-1.52360	0.652315	1.08528	0.76300-1.54368	0.01317	0.53065	0.014	47.22312	29	0.01767	46.55294	28	0.01527
GCST90200758	25	0.914448	0.99272	0.87002-1.1327	0.698064	0.98008	0.88533-1.08497	0.663301	0.98241	0.90699-1.06411	0.171967	0.84837	0.67479-1.06660	0.574985	0.96951	0.87133-1.07875	-0.00192	0.84733	0.687	20.85127	24	0.64748	20.81336	23	0.59248
GCST90200409	14	0.302328	1.14898	0.89254-1.4791	0.454183	1.07805	0.88545-1.31254	0.66368	1.03096	0.89856-1.18287	0.467064	1.14076	0.80830-1.60996	0.614597	1.07852	0.80928-1.43735	-0.01698	0.33584	0.512	12.35811	13	0.49852	11.35291	12	0.49894
GCST90200506	18	0.645398	0.94500	0.74601-1.1970	0.808784	1.02266	0.85292-1.22618	0.664096	0.97242	0.85710-1.10326	0.544211	0.90965	0.67394-1.22780	0.823746	0.97769	0.80410-1.18877	0.00544	0.78027	0.353	19.22102	17	0.31599	19.12481	16	0.26224
GCST90200326	18	0.499326	1.11023	0.82537-1.4934	0.864712	1.01973	0.81445-1.27676	0.664692	1.03788	0.87726-1.22791	0.465089	0.85511	0.56720-1.28917	0.928019	1.01084	0.80274-1.27290	-0.01111	0.59233	0.125	25.51372	17	0.08379	25.04636	16	0.06901
GCST90200332	24	0.688571	0.93684	0.68377-1.2836	0.761636	0.97635	0.83646-1.13964	0.665038	0.96842	0.83748-1.11983	0.67996	1.06453	0.79387-1.42747	0.667751	1.03759	0.87858-1.22538	0.00486	0.81716	0.005	46.77811	23	0.00239	46.66200	22	0.00162
GCST90200841	22	0.775578	1.01526	0.91614-1.1251	0.611801	1.02203	0.93953-1.11179	0.665278	1.01722	0.94152-1.09900	0.409668	1.07754	0.90546-1.28232	0.547827	1.02499	0.94695-1.10946	0.00070	0.95460	0.081	33.77457	21	0.03830	33.76896	20	0.02773
GCST90199790	25	0.708613	0.94538	0.70671-1.2646	0.594504	1.04769	0.88255-1.24372	0.665431	1.02609	0.91303-1.15315	0.486634	1.12557	0.81071-1.56273	0.502003	1.10798	0.82505-1.48794	0.01110	0.55273	0.573	22.36512	24	0.55748	22.00209	23	0.52013
GCST90200724	23	0.833675	1.03854	0.73289-1.4717	0.156437	1.15912	0.94501-1.42175	0.66627	1.03330	0.89039-1.19914	0.195763	1.36273	0.86490-2.14709	0.154564	1.31781	0.91310-1.90192	-0.00071	0.97506	0.183	27.49242	22	0.19312	27.49111	21	0.15518
GCST90200945	14	0.651258	1.12954	0.67488-1.8905	0.532806	1.08235	0.84405-1.38793	0.669868	1.05450	0.82622-1.34584	0.805064	1.04456	0.74404-1.46647	0.585779	1.08724	0.81081-1.45793	-0.00884	0.76905	0.024	26.95529	13	0.01262	26.75416	12	0.00838
GCST90199937	28	0.906642	1.00923	0.86686-1.1750	0.542781	1.03363	0.92919-1.14980	0.671146	1.01975	0.93170-1.11613	0.481911	1.11683	0.82431-1.51314	0.507063	1.03750	0.93193-1.15503	0.00289	0.86796	0.296	31.78356	27	0.24019	31.74914	26	0.20155
GCST90199915	24	0.628084	0.93495	0.71491-1.2227	0.39689	0.92597	0.77504-1.10630	0.671552	1.02751	0.90638-1.16482	0.635898	0.92920	0.68839-1.25425	0.422301	0.90370	0.70880-1.15219	0.01343	0.44374	0.786	17.84726	23	0.76572	17.23896	22	0.75004
GCST90199740	21	0.947524	1.01254	0.70207-1.4603	0.61241	1.05677	0.85350-1.30846	0.672036	1.03305	0.88867-1.20088	0.587342	1.13281	0.72731-1.76438	0.710901	1.08237	0.71641-1.63527	0.00248	0.90700	0.451	20.00856	20	0.45739	19.99381	19	0.39495
GCST90200424	32	0.0193971	0.81716	0.69620-0.9591	0.0311214	0.87161	0.76922-0.98761	0.673551	0.98090	0.89671-1.07299	0.527388	1.10369	0.81558-1.49357	0.0501843	0.86797	0.75745-0.99461	0.02915	0.01152	0.327	31.31204	31	0.45057	24.06891	30	0.76890
GCST90200660	20	0.229683	1.26216	0.87442-1.8218	0.353436	1.10745	0.89269-1.37388	0.673941	1.03255	0.88941-1.19874	0.591097	1.09507	0.79063-1.51674	0.497618	1.10957	0.82635-1.48986	-0.02609	0.25581	0.69	15.32256	19	0.70189	13.94500	18	0.73267
GCST90199963	31	0.544226	1.04105	0.91552-1.1838	0.628912	1.02939	0.91528-1.15774	0.675246	0.98264	0.90534-1.06654	0.477746	0.92530	0.74879-1.14342	0.490634	1.04435	0.92452-1.17972	-0.01146	0.26223	0.992	14.40322	30	0.99270	13.09588	29	0.99508
GCST90200365	31	0.618819	1.06303	0.83771-1.3489	0.543883	1.05238	0.89243-1.24100	0.675471	0.97663	0.87427-1.09097	0.648313	1.07770	0.78388-1.48164	0.623916	1.06992	0.81890-1.39788	-0.01161	0.43722	0.883	21.04309	30	0.88654	20.42249	29	0.87931
GCST90199823	20	0.421457	1.08645	0.89170-1.3237	0.721457	0.97012	0.82111-1.14617	0.675838	0.97509	0.86636-1.09747	0.758633	0.96488	0.77063-1.20808	0.679536	0.96488	0.81645-1.14029	-0.01958	0.20167	0.301	23.07630	19	0.23400	21.02491	18	0.27816
GCST90200222	29	0.523514	1.07628	0.86121-1.3451	0.764818	0.97782	0.84417-1.13262	0.676014	0.97670	0.87448-1.09087	0.545635	0.90831	0.66745-1.23609	0.59075	1.05807	0.86336-1.29667	-0.01604	0.33426	0.255	32.09077	28	0.27083	30.98164	27	0.27189
GCST90199876	32	0.0422126	0.64068	0.42466-0.9666	0.808357	0.97535	0.79721-1.19330	0.676514	0.96321	0.80770-1.14867	0.648597	0.90557	0.59354-1.38164	0.984851	1.00417	0.65594-1.53726	0.04750	0.04183	0.001	69.42849	31	0.00009	60.33639	30	0.00084
GCST90199657	17	0.38906	0.87421	0.64956-1.1766	0.195888	0.87721	0.71925-1.06986	0.677222	0.96430	0.81258-1.14434	0.712717	0.91840	0.58845-1.43334	0.0635768	0.80114	0.64420-0.99631	0.01510	0.43816	0.027	27.68823	16	0.03444	26.56465	15	0.03249
GCST90200821	26	0.34664	1.09708	0.90799-1.3255	0.470888	1.04192	0.93187-1.16496	0.677914	1.02001	0.92895-1.12001	0.661093	1.04381	0.86369-1.26151	0.326943	1.06724	0.93942-1.21246	-0.01620	0.39316	0.058	36.96884	25	0.05813	35.83970	24	0.05688
GCST90200869	20	0.575031	0.94302	0.77104-1.1534	0.40294	0.92752	0.77758-1.10637	0.678836	1.02732	0.90425-1.16715	0.474689	1.15321	0.78620-1.69155	0.468963	0.93582	0.78485-1.11583	0.01527	0.29678	0.263	22.02392	19	0.28307	20.69634	18	0.29501
GCST90199957	20	0.417532	1.16049	0.81650-1.6494	0.618189	0.95524	0.79781-1.14373	0.678966	1.03481	0.88001-1.21683	0.685484	0.93805	0.69159-1.27233	0.577455	0.93204	0.73073-1.18882	-0.02348	0.47922	0.014	35.31367	19	0.01280	34.31819	18	0.01150
GCST90199640	20	0.483761	0.95298	0.83512-1.0875	0.433703	0.95895	0.86341-1.06506	0.679334	0.98172	0.89949-1.07147	0.714575	1.04354	0.83328-1.30685	0.453077	0.96207	0.87144-1.06213	0.00723	0.56319	0.935	9.91482	19	0.95502	9.56791	18	0.94510
GCST90199900	27	0.625597	1.07150	0.81470-1.4092	0.538752	0.94989	0.80627-1.11909	0.680495	0.97465	0.86250-1.10137	0.635618	0.93176	0.69795-1.24390	0.610839	0.94070	0.74546-1.18707	-0.01539	0.45504	0.147	33.99084	26	0.13526	33.22553	25	0.12553
GCST90200706	30	0.303825	1.08744	0.92958-1.2721	0.56892	1.02910	0.93239-1.13584	0.681317	1.02146	0.92301-1.13042	0.6165	0.93720	0.72910-1.20471	0.583908	1.02842	0.93134-1.13562	-0.01306	0.31450	0.038	49.22492	29	0.01093	47.44731	28	0.01228
GCST90200289	16	0.550801	0.91717	0.69512-1.2102	0.982574	0.99784	0.82180-1.21158	0.681525	1.03494	0.87838-1.21941	0.959912	0.99196	0.72781-1.35197	0.991939	1.00138	0.76922-1.30363	0.02083	0.30830	0.11	22.68240	15	0.09112	21.00529	14	0.10150
GCST90200433	16	0.387412	1.19733	0.80608-1.7785	0.436129	0.91771	0.73934-1.13912	0.681725	0.96843	0.83077-1.12890	0.616306	0.90247	0.60916-1.33701	0.614234	0.90617	0.62268-1.31871	-0.02689	0.27415	0.378	15.98726	15	0.38290	14.63325	14	0.40368
GCST90200317	25	0.581255	1.08333	0.81843-1.4340	0.21817	0.90090	0.76303-1.06369	0.68275	1.02549	0.90888-1.15707	0.324821	0.83835	0.59445-1.18232	0.3178	0.84903	0.61997-1.16271	-0.00771	0.67363	0.342	26.43323	24	0.33156	26.22571	23	0.29033
GCST90200362	25	0.572854	0.97913	0.91087-1.0525	0.427399	0.96905	0.89665-1.04729	0.683748	0.98744	0.92920-1.04934	0.369849	1.14188	0.85911-1.51772	0.345295	0.96773	0.90522-1.03456	0.00450	0.67533	0.472	22.88151	24	0.52680	22.70153	23	0.47831
GCST90200712	18	0.870845	0.97397	0.71227-1.3318	0.676712	0.96191	0.80141-1.15456	0.684128	0.97164	0.84590-1.11608	0.784526	0.95748	0.70468-1.30097	0.786813	0.95748	0.70230-1.30538	-0.00031	0.98689	0.992	6.17654	17	0.99192	6.17627	16	0.98608
GCST90200501	28	0.0507457	1.35413	1.01316-1.8098	0.344032	1.07693	0.92366-1.25563	0.684646	1.02514	0.90936-1.15567	0.380724	1.14542	0.84973-1.54400	0.200425	1.17257	0.92446-1.48727	-0.04112	0.05130	0.096	36.94465	27	0.09611	31.83392	26	0.19867
GCST90200046	27	0.138352	0.84437	0.67994-1.0486	0.17218	0.90627	0.78685-1.04381	0.685417	0.97820	0.87923-1.08830	0.146055	0.82570	0.64273-1.06076	0.217302	0.89815	0.76038-1.06088	0.02371	0.14151	0.2	31.90956	26	0.19613	29.21591	25	0.25499
GCST90200323	25	0.619132	0.96279	0.83074-1.1158	0.533298	1.03805	0.92297-1.16749	0.685725	1.02053	0.92486-1.12611	0.0775051	1.22484	0.98737-1.51941	0.4868	1.04059	0.93182-1.16205	0.01306	0.31012	0.071	34.44892	24	0.07700	32.90772	23	0.08269
GCST90200201	22	0.0521507	0.86325	0.75078-0.9926	0.696893	1.02910	0.89077-1.18891	0.687302	1.02093	0.92299-1.12926	0.174815	1.25918	0.91286-1.73690	0.0653273	0.86875	0.75389-1.00111	0.03646	0.00532	0.147	25.36038	21	0.23189	15.58778	20	0.74185
GCST90200716	22	0.181447	0.82039	0.61987-1.0858	0.445472	0.94470	0.81625-1.09336	0.688091	0.97429	0.85795-1.10641	0.631427	0.94090	0.73624-1.20244	0.507925	0.93203	0.75941-1.14388	0.03031	0.19435	0.056	31.98490	21	0.05876	29.33948	20	0.08129
GCST90200024	22	0.0578233	1.12689	1.00312-1.2659	0.586661	1.02712	0.93267-1.13113	0.689844	0.98526	0.91596-1.05981	0.867136	1.01367	0.86630-1.18610	0.490419	1.03051	0.94756-1.12073	-0.03531	0.00890	0.486	21.14541	21	0.45010	12.74832	20	0.88792
GCST90200210	27	0.252932	0.80576	0.56120-1.1569	0.32237	0.91597	0.76982-1.08988	0.690045	1.02641	0.90297-1.16673	0.422245	0.86370	0.60730-1.22836	0.331353	0.86028	0.63859-1.15892	0.02700	0.17307	0.901	16.80881	26	0.91475	14.84190	25	0.94500
GCST90199910	24	0.878	0.98165	0.77706-1.2401	0.860093	0.98450	0.82748-1.17131	0.691325	1.02647	0.90228-1.16775	0.716684	0.94395	0.69391-1.28409	0.752951	0.97163	0.81394-1.15987	0.00761	0.65538	0.1	32.97077	23	0.08158	32.66681	22	0.06672
GCST90200875	25	0.45385	0.88792	0.65400-1.2055	0.920404	1.01018	0.82813-1.23225	0.691804	1.03090	0.88687-1.19833	0.927631	0.97930	0.62658-1.53059	0.281226	1.28980	0.82038-2.02782	0.02227	0.28362	0.008	41.62056	24	0.01423	39.54799	23	0.01726
GCST90199940	24	0.120873	1.27034	0.94992-1.6988	0.644862	1.04560	0.86499-1.26393	0.692548	1.02800	0.89647-1.17883	0.537489	1.11095	0.79914-1.54442	0.627445	1.07980	0.79523-1.46620	-0.02638	0.11990	0.638	20.19628	23	0.63004	17.57813	22	0.73069
GCST90200568	24	0.925916	0.98797	0.76773-1.2714	0.721365	0.97094	0.82569-1.14175	0.692752	1.02398	0.91041-1.15173	0.924753	1.01321	0.77401-1.32633	0.771231	0.96474	0.75953-1.22538	0.00483	0.75612	0.856	16.23927	23	0.84484	16.14037	22	0.80886
GCST90200893	20	0.478599	1.12896	0.81282-1.5681	0.939748	0.99138	0.79207-1.24084	0.692845	1.03070	0.88709-1.19756	0.650115	0.90629	0.59640-1.37720	0.842792	0.96305	0.66719-1.39011	-0.01161	0.54908	0.472	18.28990	19	0.50316	17.91703	18	0.46113
GCST90199696	25	0.343552	1.09389	0.91198-1.3121	0.648781	1.03854	0.88258-1.22205	0.694251	0.97694	0.86965-1.09746	0.799999	0.96452	0.73157-1.27163	0.274891	1.11964	0.91831-1.36510	-0.02223	0.13350	0.163	28.86945	24	0.22508	26.12169	23	0.29516
GCST90200519	27	0.246212	0.86683	0.68469-1.0974	0.42452	0.93252	0.78559-1.10694	0.694766	0.97621	0.86556-1.10099	0.639057	0.92201	0.65931-1.28938	0.560063	0.92201	0.70413-1.20731	0.01742	0.26288	0.314	29.11441	26	0.30590	27.66269	25	0.32361
GCST90200303	32	0.761571	0.93319	0.59942-1.4528	0.387188	0.92637	0.77894-1.10171	0.695496	1.03431	0.87355-1.22465	0.591299	0.91849	0.67559-1.24872	0.400315	0.88979	0.68035-1.16370	0.01170	0.62496	0.001	62.90985	31	0.00060	62.40240	30	0.00047
GCST90200682	18	0.681126	0.98006	0.89184-1.0770	0.99474	0.99967	0.90589-1.10315	0.695694	0.98591	0.91822-1.05858	0.754371	1.03272	0.84685-1.25938	0.873943	0.99289	0.91031-1.08296	0.00224	0.85311	0.701	13.27192	17	0.71780	13.23652	16	0.65539
GCST90200397	22	0.437702	0.85039	0.56941-1.2700	0.222569	1.13899	0.92405-1.40392	0.695929	1.03275	0.87863-1.21391	0.13887	1.30344	0.92996-1.82691	0.179463	1.25897	0.90962-1.74249	0.02475	0.31212	0.169	27.52079	21	0.15427	26.11661	20	0.16200
GCST90200662	16	0.432524	0.80532	0.47633-1.3615	0.32721	0.88112	0.68403-1.13499	0.696004	0.96541	0.80913-1.15187	0.462879	0.85608	0.57141-1.28258	0.402008	0.86396	0.61969-1.20452	0.02116	0.48421	0.873	9.29596	15	0.86154	8.77957	14	0.84491
GCST90199743	20	0.0192954	1.60017	1.11797-2.2903	0.664654	0.96224	0.80853-1.14517	0.700732	1.02711	0.89613-1.17723	0.242511	0.82529	0.60411-1.12747	0.568904	0.93713	0.75242-1.16718	-0.05430	0.01912	0.183	24.19315	19	0.18885	17.56776	18	0.48445
GCST90199625	25	0.622351	0.93480	0.71739-1.2181	0.103263	0.86424	0.72511-1.03006	0.701375	0.97638	0.86408-1.10327	0.304426	0.84407	0.61500-1.15845	0.290031	0.85071	0.63471-1.14022	0.00610	0.71973	0.608	21.37033	24	0.61679	21.23838	23	0.56653
GCST90200964	18	0.920704	1.02158	0.67540-1.5452	0.438749	0.93441	0.78697-1.10947	0.701431	0.96690	0.81407-1.14844	0.185991	0.82647	0.63026-1.08377	0.292375	0.88108	0.70120-1.10712	-0.01097	0.77689	0.003	38.83570	17	0.00188	38.63513	16	0.00123
GCST90200718	19	0.0985534	0.85357	0.71471-1.0194	0.231361	0.89789	0.75269-1.07109	0.701699	0.97555	0.85949-1.10728	0.705331	0.93003	0.64237-1.34651	0.096424	0.86858	0.74205-1.01668	0.02978	0.06557	0.182	23.25775	18	0.18088	18.94143	17	0.33190
GCST90200528	19	0.706198	0.94533	0.70915-1.2602	0.524382	0.93986	0.77646-1.13763	0.701898	1.02711	0.89565-1.17786	0.293924	1.21611	0.85294-1.73391	0.355122	0.87404	0.66189-1.15418	0.01318	0.52852	0.741	13.23554	18	0.77739	12.82152	17	0.74805
GCST90200353	18	0.690914	1.03747	0.86823-1.2397	0.980106	1.00216	0.84575-1.18751	0.704393	1.02226	0.91236-1.14540	0.551341	1.09869	0.81108-1.48830	0.895106	1.01145	0.85617-1.19488	-0.00279	0.83190	0.483	17.55011	17	0.41774	17.49919	16	0.35403
GCST90200673	40	0.819335	0.98774	0.88916-1.0972	0.295852	0.95291	0.87050-1.04311	0.70545	0.98660	0.91995-1.05808	0.171105	0.88277	0.74085-1.05188	0.357046	0.95832	0.87626-1.04807	-0.00030	0.97698	0.077	52.29595	39	0.07555	52.29479	38	0.06124
GCST90199809	23	0.950418	1.00855	0.77369-1.3147	0.439143	0.92974	0.77306-1.11819	0.705673	0.97403	0.84973-1.11653	0.800046	0.95831	0.69203-1.32705	0.721167	0.95831	0.76075-1.20718	-0.00514	0.76510	0.207	27.47364	22	0.19379	27.35429	21	0.15943
GCST90200940	26	0.280514	1.16340	0.88929-1.5220	0.867839	0.98807	0.85777-1.13815	0.708003	1.02244	0.91033-1.14836	0.710602	0.95205	0.73655-1.23059	0.844189	0.97769	0.78254-1.22152	-0.02076	0.30671	0.065	36.54125	25	0.06378	34.95273	24	0.06910
GCST90199758	35	0.784406	0.98139	0.85875-1.1215	0.419774	1.05099	0.93139-1.18595	0.70894	1.01527	0.93762-1.09934	0.655225	1.05111	0.84616-1.30570	0.465199	1.04608	0.92822-1.17890	0.00691	0.53919	0.627	31.19866	34	0.60565	30.81363	33	0.57639
GCST90200877	19	0.290593	1.24131	0.84176-1.8305	0.782743	0.96777	0.76676-1.22149	0.708955	0.96975	0.82528-1.13950	0.928522	0.98099	0.64881-1.48326	0.891874	1.02592	0.71307-1.47602	-0.03154	0.18982	0.439	18.48148	18	0.42438	16.61622	17	0.48065
GCST90200616	28	0.308161	1.06420	0.94639-1.1967	0.555817	1.03681	0.91932-1.16930	0.709215	0.98356	0.90149-1.07310	0.205661	0.84794	0.66084-1.08801	0.485839	1.03610	0.93904-1.14319	-0.02012	0.07269	0.316	30.64165	27	0.28611	27.00679	26	0.40898
GCST90200590	18	0.673626	1.05518	0.82559-1.3486	0.677177	1.02811	0.90230-1.17147	0.709904	1.02296	0.90765-1.15291	0.73723	1.03402	0.85316-1.25324	0.509997	1.04628	0.91712-1.19362	-0.00632	0.77835	0.054	28.35308	17	0.04098	28.20861	16	0.02985
GCST90200583	19	0.839991	0.98495	0.85205-1.1386	0.988106	0.99898	0.87350-1.14249	0.711248	0.98288	0.89701-1.07697	0.513332	1.06456	0.88575-1.27946	0.914524	0.99315	0.87755-1.12398	-0.00056	0.97118	0.956	9.53857	18	0.94593	9.53723	17	0.92189
GCST90199928	32	0.474141	1.10234	0.84703-1.4346	0.58959	1.04389	0.89304-1.22023	0.714606	0.97854	0.87110-1.09922	0.352389	1.17266	0.84251-1.63217	0.304995	1.20135	0.85106-1.69583	-0.01665	0.33112	0.084	42.16130	31	0.08714	40.83306	30	0.08971
GCST90200887	17	0.611921	1.09719	0.77250-1.5584	0.0888147	1.20827	0.97169-1.50246	0.715208	1.03006	0.87857-1.20766	0.287701	1.25670	0.83634-1.88835	0.147797	1.26474	0.93444-1.71178	-0.00909	0.69581	0.434	16.11910	16	0.44468	15.95016	15	0.38537
GCST90199832	21	0.563778	0.91096	0.66741-1.2434	0.88615	0.98569	0.80917-1.20072	0.715976	0.97461	0.84851-1.11945	0.391181	0.88335	0.66938-1.16571	0.898116	0.98344	0.76403-1.26584	0.00804	0.64006	0.954	10.63178	20	0.95522	10.40597	19	0.94221
GCST90200748	25	0.219988	1.22143	0.89503-1.6669	0.821579	0.97830	0.80848-1.18379	0.716589	0.97337	0.84135-1.12610	0.715287	1.07965	0.71868-1.62193	0.76575	1.05620	0.74009-1.50733	-0.02803	0.12187	0.052	34.65105	24	0.07375	31.15629	23	0.11900
GCST90199871	28	0.584787	0.91161	0.65682-1.2652	0.115671	0.86787	0.72741-1.03546	0.71677	0.97251	0.83656-1.13056	0.31457	0.83737	0.59632-1.17585	0.0786861	0.81940	0.66179-1.01454	0.00835	0.66565	0.012	47.29549	27	0.00919	46.95048	26	0.00713
GCST90200820	22	0.88909	1.01876	0.78717-1.3185	0.783382	1.02095	0.88064-1.18363	0.71705	1.02280	0.90539-1.15545	0.873538	1.02132	0.79013-1.32016	0.746415	1.03036	0.86157-1.23222	0.00070	0.97288	0.049	34.35717	21	0.03317	34.35513	20	0.02382
GCST90199911	26	0.692465	0.97182	0.84492-1.1178	0.826934	0.98804	0.88700-1.10058	0.717106	1.01519	0.93569-1.10145	0.332124	0.89817	0.72599-1.11119	0.761269	0.98294	0.88070-1.09704	0.00924	0.45908	0.758	20.12697	25	0.74013	19.56076	24	0.72146
GCST90200192	25	0.807824	1.02618	0.83523-1.2608	0.747427	1.02379	0.88727-1.18133	0.717208	1.01976	0.91729-1.13368	0.968324	0.99506	0.78129-1.26732	0.675791	1.03992	0.86756-1.24653	-0.00124	0.94505	0.804	18.37816	24	0.78429	18.37331	23	0.73694
GCST90200257	31	0.537824	0.97327	0.89380-1.0598	0.38774	1.03594	0.95617-1.12237	0.717328	0.98895	0.93120-1.05028	0.336105	0.91623	0.76882-1.09190	0.357551	1.03705	0.96085-1.11930	0.00522	0.60282	0.106	37.34389	30	0.16733	36.99084	29	0.14646
GCST90199929	26	0.88078	1.01853	0.80331-1.2914	0.833508	1.01854	0.85818-1.20888	0.717677	1.02203	0.90817-1.15015	0.474868	1.11368	0.83261-1.48963	0.857747	1.02281	0.80125-1.30565	0.00045	0.97423	0.708	20.60914	25	0.71419	20.60807	24	0.66172
GCST90200692	31	0.399785	0.93825	0.81065-1.0859	0.265059	0.95568	0.88245-1.03499	0.719813	0.98224	0.89060-1.08330	0.367657	0.87003	0.64560-1.17248	0.434832	0.96455	0.88209-1.05472	0.01224	0.41278	0.004	68.36714	30	0.00008	66.77713	29	0.00008
GCST90200481	13	0.793735	1.05901	0.69618-1.6109	0.15825	1.19759	0.93225-1.53845	0.720189	1.03722	0.84923-1.26683	0.309089	1.28380	0.80962-2.03570	0.226397	1.23750	0.89186-1.71710	-0.00323	0.91285	0.117	17.59385	12	0.12859	17.57381	11	0.09201
GCST90199770	24	0.477435	0.93231	0.77093-1.1275	0.350951	0.93050	0.79981-1.08256	0.722695	0.98212	0.88897-1.08503	0.891748	0.97936	0.72769-1.31808	0.291901	0.91668	0.78265-1.07366	0.00915	0.53496	0.48	22.40847	23	0.49572	22.01093	22	0.45924
GCST90200994	38	0.347677	0.87517	0.66499-1.1518	0.981612	1.00176	0.86274-1.16318	0.723431	1.01941	0.91645-1.13393	0.643591	0.93225	0.69425-1.25183	0.805155	0.97073	0.76791-1.22711	0.02066	0.24575	0.331	40.72048	37	0.31003	39.20421	36	0.32813
GCST90199980	32	0.934385	1.01074	0.78552-1.3005	0.878184	0.98831	0.85031-1.14870	0.725107	1.01937	0.91598-1.13443	0.483975	0.89788	0.66649-1.20961	0.692169	0.94235	0.70427-1.26092	0.00109	0.94225	0.556	28.74950	31	0.58228	28.74416	30	0.53106
GCST90200173	16	0.898551	0.97387	0.65295-1.4525	0.764825	0.96616	0.77108-1.21061	0.725693	1.03013	0.87270-1.21597	0.80897	0.94890	0.62487-1.44097	0.763211	0.93770	0.62170-1.41430	0.00641	0.76660	0.731	11.16492	15	0.74082	11.07332	14	0.68027
GCST90200366	25	0.527193	1.07468	0.86257-1.3389	0.915711	0.99019	0.82489-1.18861	0.728548	1.02314	0.89913-1.16427	0.815574	0.96597	0.72442-1.28806	0.878946	0.98417	0.80321-1.20589	-0.00825	0.59045	0.147	31.43640	24	0.14159	31.03443	23	0.12195
GCST90200954	28	0.99336	1.00159	0.69101-1.4518	0.290706	1.10583	0.91758-1.33270	0.729006	1.02693	0.88358-1.19355	0.244447	1.25284	0.86425-1.81616	0.318222	1.16391	0.86869-1.55945	0.00335	0.88596	0.022	43.32411	27	0.02425	43.28919	26	0.01800
GCST90200373	23	0.235521	1.04701	0.97260-1.1271	0.458468	1.03036	0.95203-1.11513	0.731098	1.01120	0.94897-1.07752	0.321052	1.17184	0.86279-1.59160	0.364026	1.03510	0.96228-1.11344	-0.01560	0.09316	0.399	22.57930	22	0.42580	19.48567	21	0.55402
GCST90200871	28	0.589095	0.97412	0.88674-1.0701	0.595812	0.97459	0.88617-1.07183	0.73162	0.98745	0.91872-1.06133	0.80182	1.03430	0.79686-1.34249	0.560104	0.97297	0.88831-1.06570	0.00434	0.66172	0.786	21.51614	27	0.76154	21.32026	26	0.72525
GCST90199975	23	0.203454	0.79486	0.56417-1.1199	0.82599	0.97321	0.76395-1.23979	0.731696	0.96665	0.79629-1.17347	0.313241	0.80750	0.53802-1.21195	0.440663	0.90354	0.70144-1.16386	0.02462	0.19285	0.021	38.94657	22	0.01431	35.85601	21	0.02269
GCST90200187	15	0.685819	1.10856	0.68032-1.8064	0.493051	0.92306	0.73420-1.16050	0.732841	1.03577	0.84650-1.26736	0.950778	1.01237	0.68989-1.48560	0.39206	0.89298	0.69461-1.14799	-0.00880	0.76774	0.024	26.17654	14	0.02458	25.99467	13	0.01703
GCST90200331	32	0.22162	1.14091	0.92758-1.4033	0.101283	1.10697	0.98027-1.25005	0.732883	1.01862	0.91623-1.13245	0.954606	0.99127	0.73461-1.33759	0.0324545	1.14308	1.01682-1.28502	-0.02096	0.22252	0.003	57.30443	31	0.00277	54.48620	30	0.00406
GCST90199826	19	0.988653	1.00126	0.84333-1.1888	0.770417	0.97823	0.84381-1.13407	0.733036	1.01884	0.91521-1.13422	0.856603	0.97796	0.77059-1.24114	0.776745	0.97796	0.84025-1.13823	0.00366	0.80214	0.756	14.13768	18	0.72007	14.07289	17	0.66194
GCST90200677	25	0.636587	0.96088	0.81607-1.1314	0.803549	1.01340	0.91248-1.12550	0.733274	0.98235	0.88670-1.08832	0.971533	0.99552	0.77981-1.27089	0.841466	1.01046	0.91351-1.11770	0.00516	0.73349	0.047	38.77421	24	0.02884	38.57500	23	0.02208
GCST90200889	27	0.882846	1.00856	0.90147-1.1284	0.567143	1.02964	0.93161-1.13800	0.733737	1.01486	0.93217-1.10488	0.250581	1.18491	0.89287-1.57248	0.410373	1.04173	0.94660-1.14642	0.00208	0.86573	0.214	33.87785	26	0.13813	33.83834	25	0.11141
GCST90200285	22	0.788469	1.03640	0.80098-1.3410	0.6873	0.96268	0.79994-1.15853	0.733991	0.97779	0.85900-1.11301	0.707468	0.94197	0.69226-1.28176	0.436258	0.90460	0.70620-1.15874	-0.01177	0.61416	0.563	18.72540	21	0.60275	18.46311	20	0.55693
GCST90200384	24	0.994119	0.99901	0.76919-1.2975	0.45382	1.06931	0.89733-1.27424	0.734384	0.97946	0.86881-1.10421	0.656451	1.06866	0.80060-1.42646	0.612997	1.05718	0.85477-1.30751	-0.00268	0.86836	0.286	26.11315	23	0.29555	26.07981	22	0.24827
GCST90200981	14	0.810065	0.97002	0.76089-1.2366	0.788733	1.02596	0.85058-1.23750	0.735723	0.97662	0.85126-1.12044	0.342462	0.86848	0.65604-1.14970	0.834211	1.02822	0.79647-1.32739	0.00131	0.94816	0.872	7.65144	13	0.86554	7.64704	12	0.81207
GCST90200383	35	0.322441	1.12488	0.89410-1.4152	0.670515	1.03340	0.88825-1.20226	0.735771	0.98060	0.87514-1.09877	0.882716	1.02069	0.77912-1.33717	0.935633	1.00941	0.80557-1.26483	-0.01977	0.18813	0.234	40.22677	34	0.21384	38.13926	33	0.24711
GCST90200774	26	0.649934	0.92752	0.67292-1.2784	0.614389	1.05190	0.86394-1.28077	0.736067	0.97537	0.84370-1.12759	0.652272	1.07842	0.77962-1.49174	0.628772	1.06056	0.83808-1.34210	0.00620	0.73230	0.107	34.43511	25	0.09893	34.26411	24	0.08008
GCST90200745	24	0.567121	0.91102	0.66528-1.2475	0.959633	0.99554	0.83732-1.18366	0.736678	0.97721	0.85434-1.11775	0.972992	1.00544	0.73714-1.37139	0.988749	0.99778	0.73467-1.35511	0.00792	0.63336	0.809	17.65152	23	0.77611	17.41753	22	0.73991
GCST90199856	30	0.747411	0.98845	0.92164-1.0601	0.630503	0.98495	0.92594-1.04772	0.736783	0.99040	0.93624-1.04769	0.885677	0.99167	0.88566-1.11036	0.576905	0.98634	0.94032-1.03461	0.00090	0.92436	0.024	48.43117	29	0.01325	48.41530	28	0.00966
GCST90200086	19	0.539627	1.13924	0.75745-1.7135	0.210928	0.88701	0.73509-1.07031	0.737628	1.03215	0.85772-1.24204	0.981912	0.99524	0.66250-1.49509	0.258345	0.88178	0.71386-1.08920	-0.01420	0.59972	0.004	38.91114	18	0.00293	38.26735	17	0.00226
GCST90199837	28	0.860893	1.02811	0.75632-1.3976	0.805054	0.97726	0.81409-1.17313	0.737744	1.02355	0.89316-1.17299	0.918522	1.02103	0.68777-1.51579	0.76725	0.94967	0.67694-1.33228	-0.00060	0.97488	0.217	31.83183	27	0.23837	31.83059	26	0.19878
GCST90199829	16	0.120076	0.75970	0.54869-1.0519	0.361373	0.90579	0.73240-1.12023	0.738309	0.97485	0.83954-1.13197	0.494083	1.14451	0.78470-1.66930	0.298436	0.81702	0.56563-1.18014	0.03383	0.11300	0.56	13.36227	15	0.57434	10.50341	14	0.72453
GCST90200427	29	0.587615	0.94568	0.77467-1.1544	0.878029	0.98754	0.84139-1.15908	0.73895	0.98228	0.88423-1.09120	0.553225	1.09578	0.81283-1.47721	0.756865	1.03604	0.82980-1.29355	0.00614	0.66404	0.605	25.70883	28	0.58905	25.51598	27	0.54557
GCST90200109	33	0.314103	0.90689	0.75207-1.0936	0.35254	0.94240	0.83161-1.06796	0.739092	0.98414	0.89576-1.08124	0.261173	1.19239	0.88201-1.61200	0.321089	0.93188	0.81240-1.06893	0.01539	0.32979	0.087	43.00923	32	0.09254	41.69084	31	0.09515
GCST90200253	23	0.567715	1.04231	0.90624-1.1988	0.499212	1.04633	0.91753-1.19321	0.740051	1.01575	0.92618-1.11397	0.802794	0.96859	0.75623-1.24058	0.439458	1.05587	0.92223-1.20887	-0.00564	0.63055	0.379	23.38755	22	0.38013	23.12523	21	0.33734
GCST90199787	24	0.460692	0.89099	0.65920-1.2043	0.87745	0.98403	0.80194-1.20747	0.740078	1.02518	0.88512-1.18739	0.747095	0.93624	0.63031-1.39066	0.895147	0.97902	0.71677-1.33724	0.01904	0.30755	0.261	27.23787	23	0.24598	25.95072	22	0.25380
GCST90199870	25	0.40617	1.09501	0.88739-1.3512	0.890242	1.01023	0.87425-1.16736	0.740088	0.98252	0.88530-1.09041	0.113311	0.77443	0.57093-1.05045	0.60356	1.05175	0.87157-1.26917	-0.01617	0.25762	0.296	27.00148	24	0.30438	25.50708	23	0.32468
GCST90200099	20	0.265882	1.16413	0.89814-1.5089	0.428778	1.05546	0.92337-1.20646	0.740836	0.97969	0.86751-1.10637	0.939977	1.00759	0.82976-1.22352	0.443145	1.05424	0.92371-1.20321	-0.03166	0.16047	0.07	29.54817	19	0.05784	26.40460	18	0.09086
GCST90200178	22	0.468566	1.10726	0.84503-1.4509	0.480689	1.06457	0.89463-1.26679	0.741177	1.02191	0.89857-1.16218	0.576385	1.07739	0.83285-1.39372	0.400933	1.10196	0.88261-1.37581	-0.01282	0.51424	0.268	23.85943	21	0.29992	23.34472	20	0.27219
GCST90199878	34	0.927608	0.98497	0.71224-1.3621	0.898407	1.01120	0.85226-1.19979	0.741209	1.02551	0.88312-1.19085	0.652106	1.06981	0.79994-1.43073	0.601383	1.05244	0.87040-1.27255	0.00615	0.78442	<0.001	65.04807	33	0.00073	64.89373	32	0.00051
GCST90200102	20	0.236997	0.84423	0.64363-1.1074	0.189823	1.10413	0.95215-1.28037	0.741341	1.02294	0.89404-1.17042	0.631936	0.92723	0.68406-1.25685	0.426173	1.07160	0.90708-1.26597	0.03374	0.13169	0.019	32.66435	19	0.02627	28.68926	18	0.05231
GCST90200930	19	0.204863	0.73926	0.47179-1.1584	0.520943	1.07743	0.85800-1.35299	0.741732	0.97088	0.81441-1.15741	0.616942	1.09772	0.76660-1.57184	0.564599	1.10761	0.78730-1.55823	0.02927	0.21488	0.237	21.99621	18	0.23215	20.03952	17	0.27221
GCST90199794	28	0.190265	0.80441	0.58576-1.1047	0.896305	0.98868	0.83316-1.17324	0.742061	1.02050	0.90434-1.15157	0.728739	1.05855	0.77001-1.45520	0.848665	0.97201	0.72820-1.29746	0.02811	0.12548	0.335	29.41452	27	0.34109	26.82836	26	0.41838
GCST90200203	31	0.897889	0.99108	0.86542-1.1350	0.766563	0.98289	0.87705-1.10150	0.742472	1.01365	0.93489-1.09905	0.971667	0.99664	0.82910-1.19805	0.909408	0.99266	0.87531-1.12574	0.00519	0.68807	0.888	21.18190	30	0.88211	21.01744	29	0.85851
GCST90200509	23	0.0108808	0.71608	0.56651-0.9051	0.383079	0.92448	0.77494-1.10288	0.744261	0.98012	0.86871-1.10581	0.592674	0.90705	0.63778-1.29002	0.408841	0.86788	0.62404-1.20700	0.05105	0.00590	0.635	18.95322	22	0.64822	9.57011	21	0.98397
GCST90200389	18	0.491003	0.82553	0.48441-1.4069	0.491271	1.09121	0.85105-1.39914	0.744863	0.96791	0.79529-1.17800	0.493764	1.15298	0.77370-1.71819	0.326168	1.20443	0.83981-1.72738	0.01976	0.53689	0.241	21.22977	17	0.21618	20.71414	16	0.18976
GCST90200846	23	0.894893	0.97772	0.70274-1.3603	0.639067	0.95472	0.78663-1.15872	0.745403	0.97581	0.84171-1.13127	0.599424	0.91885	0.67309-1.25435	0.6199	0.94084	0.74188-1.19316	-0.00025	0.98969	0.113	30.76802	22	0.10096	30.76777	21	0.07761
GCST90199890	26	0.601767	1.06916	0.83446-1.3699	0.997251	0.99971	0.84604-1.18129	0.745645	1.01934	0.90794-1.14440	0.685851	1.06047	0.80054-1.40479	0.730074	1.04578	0.81327-1.34477	-0.00677	0.67226	0.49	24.79872	25	0.47370	24.61062	24	0.42716
GCST90200926	31	0.245467	1.17992	0.89754-1.5512	0.998946	0.99990	0.85980-1.16282	0.749651	1.02123	0.89759-1.16190	0.718842	1.05212	0.79994-1.38381	0.729127	1.03766	0.84339-1.27668	-0.02356	0.25087	0.005	53.52320	30	0.00519	51.10407	29	0.00685
GCST90200575	17	0.690063	1.01355	0.94986-1.0815	0.444321	1.02691	0.95936-1.09923	0.749915	1.00868	0.95647-1.06375	0.971764	0.99641	0.81917-1.21200	0.710605	1.01116	0.95457-1.07110	-0.00265	0.80324	0.686	12.80839	16	0.68671	12.74407	15	0.62206
GCST90199793	33	0.549699	0.94693	0.79355-1.1300	0.218033	1.08662	0.95208-1.24017	0.750441	1.01542	0.92404-1.11584	0.595158	1.06729	0.84140-1.35382	0.346283	1.06729	0.93388-1.21976	0.01132	0.36634	0.196	39.10005	32	0.18108	38.06796	31	0.17864
GCST90200184	29	0.337589	1.07571	0.92910-1.2455	0.558193	1.03653	0.91923-1.16880	0.750565	1.01377	0.93177-1.10300	0.764132	1.04193	0.79881-1.35904	0.783491	1.01591	0.90868-1.13580	-0.01187	0.34058	0.751	22.40731	28	0.76209	21.46610	27	0.76399
GCST90199867	23	0.8573	1.02480	0.78719-1.3341	0.470026	1.06933	0.89151-1.28263	0.751451	1.02147	0.89565-1.16497	0.705617	1.06259	0.77864-1.45008	0.385502	1.12129	0.87028-1.44471	-0.00047	0.97781	0.211	26.83458	22	0.21758	26.83357	21	0.17643
GCST90200911	25	0.977607	0.99655	0.78484-1.2654	0.870223	0.98709	0.84460-1.15362	0.751776	0.98128	0.87286-1.10317	0.848478	1.02633	0.78843-1.33601	0.753668	1.04204	0.80809-1.34372	-0.00190	0.88492	0.421	25.09678	24	0.40052	25.07344	23	0.34651
GCST90200879	22	0.829073	1.04932	0.68166-1.6153	0.84345	1.02026	0.83609-1.24500	0.752525	1.02426	0.88248-1.18880	0.992079	0.99821	0.70442-1.41455	0.967484	1.00689	0.72651-1.39549	-0.00251	0.90800	0.966	11.14684	21	0.95985	11.13314	20	0.94270
GCST90200494	13	0.716827	0.92721	0.62277-1.3805	0.357398	1.10223	0.89588-1.35610	0.752953	1.03292	0.84426-1.26374	0.566889	1.12438	0.76111-1.66103	0.441787	1.13077	0.83534-1.53068	0.02125	0.54628	0.051	22.15169	12	0.03585	21.39779	11	0.02948
GCST90199836	21	0.945647	0.98516	0.64467-1.5055	0.936742	0.99103	0.79322-1.23815	0.753528	0.96956	0.79943-1.17590	0.951337	1.01347	0.66306-1.54906	0.971775	1.00649	0.70647-1.43392	-0.00189	0.93439	0.03	34.16578	20	0.02502	34.15327	19	0.01763
GCST90199949	25	0.948687	0.99392	0.82719-1.1943	0.878337	1.01124	0.87642-1.16679	0.754099	1.01785	0.91119-1.13699	0.616726	0.92366	0.67951-1.25552	0.928589	1.00743	0.85836-1.18238	0.00405	0.75052	0.322	28.27928	24	0.24844	28.15254	23	0.21007
GCST90200223	23	0.354707	1.09982	0.90312-1.3394	0.97056	0.99752	0.87426-1.13816	0.75619	0.98358	0.88596-1.09195	0.871185	1.01692	0.83221-1.24262	0.991189	1.00090	0.85497-1.17173	-0.02036	0.20671	0.26	26.71866	22	0.22211	24.72037	21	0.25948
GCST90200681	28	0.884111	0.99709	0.95920-1.0365	0.886518	1.00297	0.96297-1.04463	0.757428	1.00556	0.97080-1.04157	0.571175	0.95948	0.83294-1.10523	0.93418	0.99851	0.96412-1.03413	0.00825	0.31819	0.455	30.07113	27	0.31097	28.91909	26	0.31477
GCST90200241	35	0.946729	0.99591	0.88387-1.1222	0.94941	1.00410	0.88494-1.13930	0.757674	1.01327	0.93186-1.10180	0.848727	1.02695	0.78304-1.34683	0.858767	0.99036	0.89085-1.10098	0.00336	0.69070	0.532	33.65714	34	0.48432	33.49360	33	0.44333
GCST90200477	29	0.288444	0.86231	0.65950-1.1275	0.224342	0.91237	0.78692-1.05783	0.757821	0.98393	0.88767-1.09064	0.411543	0.87876	0.64848-1.19081	0.359197	0.88578	0.68641-1.14307	0.01782	0.30550	0.708	23.84205	28	0.68984	22.75098	27	0.69832
GCST90200398	18	0.660903	0.97929	0.89339-1.0734	0.589847	0.97661	0.89606-1.06439	0.75792	0.98860	0.91912-1.06335	0.614138	0.92867	0.70020-1.23169	0.499324	0.97249	0.89844-1.05265	0.00403	0.73145	0.403	18.42346	17	0.36261	18.28406	16	0.30753
GCST90200363	35	0.58674	0.97843	0.90515-1.0576	0.419999	0.96780	0.89380-1.04793	0.758624	0.99067	0.93321-1.05168	0.991057	1.00127	0.80281-1.24880	0.470757	0.97054	0.89561-1.05174	0.00423	0.62746	0.509	33.37365	34	0.49814	33.13270	33	0.46078
GCST90200961	23	0.532228	1.06212	0.88185-1.2792	0.799963	1.01669	0.89452-1.15555	0.759035	0.98533	0.89655-1.08290	0.831191	1.02314	0.83116-1.25945	0.86152	1.01609	0.85107-1.21309	-0.01633	0.36852	0.398	24.08966	22	0.34255	23.15827	21	0.33560
GCST90200719	13	0.901173	1.03412	0.61634-1.7351	0.820925	1.02893	0.80380-1.31712	0.759476	0.97199	0.81035-1.16587	0.458999	0.81054	0.47324-1.38827	0.384399	1.29799	0.73681-2.28657	-0.00867	0.80555	0.239	14.40523	12	0.27558	14.32243	11	0.21566
GCST90200290	27	0.461257	0.91454	0.72374-1.1556	0.719662	1.03273	0.86617-1.23131	0.759729	1.01806	0.90774-1.14179	0.446588	1.12228	0.83760-1.50372	0.603823	1.06803	0.83549-1.36529	0.01646	0.31262	0.678	22.20673	26	0.67733	21.14472	25	0.68451
GCST90200641	25	0.392922	0.85897	0.61003-1.2095	0.459867	0.93575	0.78465-1.11594	0.760462	1.02039	0.89623-1.16174	0.454549	0.88045	0.63408-1.22256	0.431077	0.87608	0.63377-1.21105	0.02063	0.29756	0.844	16.56938	24	0.86644	15.43338	23	0.87843
GCST90199986	23	0.49812	0.92571	0.74330-1.1529	0.921166	1.00772	0.86533-1.17354	0.76069	0.98273	0.87852-1.09931	0.86843	1.02569	0.76242-1.37986	0.972429	1.00440	0.78524-1.28473	0.00922	0.54132	0.89	14.03022	22	0.90040	13.64466	21	0.88437
GCST90199803	29	0.618207	0.95111	0.78273-1.1557	0.848426	1.01448	0.87543-1.17562	0.762166	1.01648	0.91439-1.12996	0.7255	1.05770	0.77576-1.44210	0.681864	0.95988	0.79079-1.16511	0.00983	0.43279	0.566	26.06300	28	0.56958	25.42886	27	0.55044
GCST90200090	27	0.219672	0.77963	0.52915-1.1487	0.513867	0.94336	0.79187-1.12383	0.765272	0.97699	0.83856-1.13828	0.303562	0.83665	0.59965-1.16731	0.179642	0.81423	0.60799-1.09044	0.02980	0.22666	0.004	48.10639	26	0.00525	45.32105	25	0.00769
GCST90200760	27	0.237314	1.18761	0.89906-1.5688	0.810228	1.02091	0.86222-1.20882	0.767138	1.01877	0.90078-1.15221	0.687152	1.06278	0.79283-1.42466	0.70354	1.05266	0.81048-1.36721	-0.01752	0.23990	0.759	20.44321	26	0.77010	18.99381	25	0.79742
GCST90199944	17	0.396557	0.91401	0.74690-1.1185	0.771066	1.02678	0.85934-1.22686	0.76736	0.98337	0.87994-1.09895	0.504173	1.12644	0.80056-1.58498	0.414504	1.14283	0.83623-1.56185	0.01484	0.40853	0.444	15.25605	16	0.50597	14.53304	15	0.48555
GCST90199796	15	0.988427	0.99630	0.60920-1.6294	0.457936	1.08778	0.87107-1.35841	0.767798	1.02396	0.87500-1.19828	0.453412	1.16464	0.79062-1.71560	0.703388	1.06740	0.76819-1.48315	0.00325	0.90967	0.41	14.89392	14	0.38544	14.87860	13	0.31499
GCST90199881	13	0.441973	1.11864	0.84926-1.4735	0.428129	1.08160	0.89085-1.31320	0.767961	1.02145	0.88713-1.17611	0.262816	1.19710	0.88673-1.61609	0.507882	1.09400	0.84522-1.41599	-0.01790	0.46746	0.761	8.55957	12	0.74002	7.99309	11	0.71392
GCST90200929	28	0.269579	1.09655	0.93429-1.2870	0.424986	1.06431	0.91321-1.24041	0.77001	1.01668	0.90995-1.13593	0.542014	1.08712	0.83397-1.41710	0.282726	1.07779	0.94266-1.23229	-0.01548	0.21523	0.168	35.03390	27	0.13801	32.98663	26	0.16249
GCST90200508	18	0.112607	1.26249	0.96171-1.6573	0.592511	1.05190	0.87398-1.26604	0.770343	0.98039	0.85830-1.11984	0.829601	1.03442	0.76367-1.40115	0.731483	1.04787	0.80577-1.36272	-0.04603	0.05316	0.619	15.25660	17	0.57701	10.89759	16	0.81576
GCST90200736	20	0.173926	0.89332	0.76415-1.0443	0.261378	0.93257	0.82560-1.05339	0.770473	1.01648	0.91079-1.13443	0.300596	0.89575	0.73134-1.09712	0.382195	0.94278	0.82860-1.07269	0.03859	0.04787	0.044	32.32774	19	0.02870	25.85368	18	0.10315
GCST90200650	29	0.377844	1.16338	0.83571-1.6195	0.576135	0.95268	0.80376-1.12918	0.771621	1.01900	0.89740-1.15707	0.490788	1.12146	0.81290-1.54714	0.468601	0.92699	0.75726-1.13476	-0.01623	0.40220	0.079	38.88046	28	0.08286	37.86459	27	0.08003
GCST90200720	17	0.5938	0.94303	0.76366-1.1645	0.874807	1.01518	0.84172-1.22438	0.772297	1.01791	0.90260-1.14795	0.855439	1.02599	0.78198-1.34614	0.857542	1.01827	0.83830-1.23687	0.01613	0.39953	0.44	16.54112	16	0.41587	15.75153	15	0.39875
GCST90200456	29	0.656245	1.04272	0.86906-1.2511	0.541325	1.04407	0.90913-1.19904	0.772399	0.98568	0.89393-1.08686	0.763756	1.03626	0.82333-1.30426	0.686166	1.03187	0.88759-1.19961	-0.00952	0.47948	0.916	18.51994	28	0.91229	18.00572	27	0.90334
GCST90200603	29	0.898756	0.99052	0.85656-1.1454	0.949967	0.99604	0.88001-1.12737	0.772747	0.98839	0.91309-1.06991	0.605932	1.05408	0.86487-1.28469	0.973851	1.00217	0.88114-1.13984	-0.00044	0.97260	0.983	14.14493	28	0.98613	14.14372	27	0.97981
GCST90200355	25	0.695297	0.93268	0.66096-1.3161	0.546067	0.95787	0.83293-1.10155	0.773273	1.01868	0.89815-1.15539	0.776411	1.03755	0.80680-1.33429	0.811947	0.97182	0.76992-1.22667	0.01450	0.59398	0.019	41.72221	24	0.01386	41.19873	23	0.01124
GCST90200208	20	0.459718	1.03281	0.94984-1.1230	0.337715	1.04149	0.95843-1.13174	0.774716	1.01012	0.94284-1.08219	0.473681	1.09861	0.85377-1.41366	0.345835	1.03496	0.96531-1.10964	-0.01121	0.36825	0.386	22.20356	19	0.27424	21.20033	18	0.26943
GCST90199741	27	0.907683	0.99264	0.87720-1.1233	0.782476	0.98567	0.88965-1.09205	0.774976	0.98854	0.91340-1.06986	0.864485	0.97792	0.75864-1.26058	0.716834	0.98208	0.89157-1.08176	-0.00080	0.93263	0.86	19.19855	26	0.82794	19.19126	25	0.78786
GCST90200215	25	0.825334	0.98738	0.88320-1.1038	0.662867	0.97944	0.89210-1.07533	0.775101	0.98787	0.90851-1.07415	0.974764	0.99575	0.76679-1.29307	0.549717	0.97497	0.89831-1.05817	0.00018	0.98936	0.288	30.07495	24	0.18228	30.07471	23	0.14727
GCST90200205	20	0.85333	0.97836	0.77844-1.2296	0.752104	1.02216	0.89218-1.17108	0.775664	0.98319	0.87497-1.10479	0.868245	1.02431	0.77418-1.35525	0.848591	1.01405	0.88041-1.16798	0.00088	0.96105	0.126	27.79480	19	0.08746	27.79101	18	0.06531
GCST90200159	21	0.414004	0.89362	0.68631-1.1636	0.632041	1.04397	0.87537-1.24505	0.776713	1.01774	0.90125-1.14930	0.772583	0.95473	0.70026-1.30167	0.605681	1.05847	0.85599-1.30884	0.02062	0.29019	0.633	17.12104	20	0.64510	15.93723	19	0.66146
GCST90200739	21	0.786685	1.05451	0.72186-1.5405	0.486068	1.07560	0.87618-1.32041	0.780609	0.97587	0.82173-1.15892	0.382348	1.21662	0.79123-1.87069	0.344894	1.22729	0.81047-1.85848	-0.01123	0.65627	0.036	32.86673	20	0.03489	32.51682	19	0.02731
GCST90200953	26	0.670747	1.04359	0.85929-1.2674	0.980606	1.00185	0.86331-1.16262	0.781128	0.98601	0.89276-1.08901	0.421124	1.11998	0.85367-1.46937	0.685911	1.03598	0.87459-1.22716	-0.00929	0.51170	0.926	15.89479	25	0.91793	15.45112	24	0.90686
GCST90199678	19	0.504282	0.95413	0.83372-1.0919	0.429972	0.94835	0.83133-1.08184	0.781904	0.98574	0.89041-1.09127	0.630059	1.07055	0.81503-1.40620	0.229925	0.92441	0.81663-1.04642	0.00944	0.47318	0.248	21.19502	18	0.26969	20.54461	17	0.24732
GCST90199842	31	0.966279	0.99614	0.83408-1.1897	0.615521	0.96547	0.84176-1.10737	0.782415	1.01434	0.91683-1.12222	0.542792	0.92059	0.70740-1.19803	0.596276	0.96310	0.83927-1.10520	0.00327	0.80821	0.126	39.39382	30	0.11715	39.31248	29	0.09582
GCST90200064	23	0.898933	0.97462	0.65857-1.4423	0.669978	0.95994	0.79542-1.15850	0.782418	1.02696	0.85028-1.24035	0.949109	1.01258	0.69273-1.48012	0.286817	0.87853	0.69625-1.10852	0.00804	0.76680	<0.001	53.85365	22	0.00017	53.62317	21	0.00011
GCST90200882	22	0.664713	1.05643	0.82721-1.3492	0.8	0.98010	0.83898-1.14497	0.784258	0.98432	0.87903-1.10222	0.864233	1.02030	0.81267-1.28097	0.935051	1.00695	0.85404-1.18725	-0.01169	0.53007	0.958	11.16383	21	0.95950	10.75550	20	0.95232
GCST90200828	25	0.868169	0.98030	0.77705-1.2367	0.241437	0.91771	0.79489-1.05951	0.785213	0.98482	0.88221-1.09936	0.591579	0.93839	0.74617-1.18011	0.226991	0.89617	0.75359-1.06573	0.00084	0.96502	0.327	27.37468	24	0.28729	27.37234	23	0.24045
GCST90200856	28	0.69842	0.94838	0.72748-1.2363	0.898836	0.98843	0.82607-1.18269	0.786632	0.98364	0.87292-1.10841	0.989498	1.00205	0.74085-1.35534	0.855511	0.97901	0.78088-1.22742	0.00533	0.76385	0.361	29.03817	27	0.35905	28.93559	26	0.31402
GCST90199941	28	0.486099	0.94864	0.81955-1.0981	0.432414	1.05453	0.92361-1.20400	0.787555	1.01290	0.92275-1.11186	0.986593	0.99784	0.77732-1.28092	0.826658	1.01624	0.88105-1.17216	0.01701	0.26646	0.123	35.18270	27	0.13430	33.51995	26	0.14754
GCST90199708	24	0.877703	0.98565	0.82169-1.1823	0.999553	1.00004	0.86494-1.15624	0.788542	0.98594	0.88900-1.09344	0.486336	1.08135	0.87071-1.34294	0.508973	1.05552	0.90139-1.23601	0.00006	0.99697	0.435	23.51154	23	0.43125	23.51152	22	0.37334
GCST90200810	26	0.402326	0.91417	0.74376-1.1236	0.977677	1.00226	0.85561-1.17404	0.789566	1.01575	0.90562-1.13926	0.487809	1.12199	0.81444-1.54569	0.823122	0.97263	0.76446-1.23748	0.01667	0.24187	0.182	30.21712	25	0.21626	28.50685	24	0.23924
GCST90200613	21	0.486302	1.03493	0.94134-1.1378	0.743009	1.01507	0.92822-1.11005	0.78984	0.98998	0.91933-1.06606	0.774948	1.03342	0.82741-1.29072	0.715468	1.01545	0.93618-1.10143	-0.01550	0.17233	0.37	23.40770	20	0.26922	21.16702	19	0.32765
GCST90200733	22	0.52353	1.09228	0.83680-1.4258	0.569158	0.95806	0.82668-1.11033	0.790065	1.01472	0.91122-1.12998	0.788579	0.96683	0.75790-1.23334	0.595376	0.94135	0.75569-1.17262	-0.01144	0.55912	0.332	23.35569	21	0.32531	22.95070	20	0.29122
GCST90200422	24	0.598822	1.06806	0.83869-1.3602	0.789141	0.97582	0.81559-1.16754	0.790843	1.01722	0.89663-1.15403	0.372327	0.85500	0.61012-1.19818	0.370091	0.89264	0.69973-1.13874	-0.00822	0.64536	0.145	29.76674	23	0.15622	29.47502	22	0.13179
GCST90200421	24	0.493407	0.88407	0.62503-1.2505	0.65997	1.04816	0.85000-1.29252	0.79094	1.02373	0.86075-1.21757	0.568638	0.88934	0.59767-1.32334	0.612958	1.08082	0.80307-1.45464	0.02100	0.34848	0.024	37.77121	23	0.02695	36.25869	22	0.02848
GCST90200446	24	0.0592217	0.79914	0.64076-0.9967	0.896294	0.98847	0.83027-1.17681	0.791194	1.01835	0.89008-1.16510	0.957605	0.99108	0.71482-1.37411	0.553936	0.94571	0.78824-1.13464	0.04324	0.01753	0.061	35.16285	23	0.05011	27.05123	22	0.20929
GCST90200144	30	0.0610739	1.18784	0.99925-1.4120	0.603824	1.03514	0.90855-1.17935	0.791525	1.01197	0.92653-1.10528	0.760665	0.96658	0.77829-1.20042	0.828092	1.01532	0.88623-1.16321	-0.02612	0.04531	0.393	30.39002	29	0.39473	25.99958	28	0.57307
GCST90200390	21	0.343141	1.20355	0.82842-1.7486	0.897617	1.01375	0.82337-1.24814	0.791755	0.98050	0.84718-1.13481	0.797791	1.05074	0.72317-1.52667	0.828948	1.03749	0.74619-1.44251	-0.02635	0.25696	0.665	17.26766	20	0.63553	15.90168	19	0.66383
GCST90200648	18	0.415632	1.08286	0.89844-1.3051	0.59386	1.04813	0.88182-1.24579	0.792337	1.01676	0.89843-1.15067	0.858593	0.96941	0.69233-1.35738	0.704968	1.03154	0.88073-1.20816	-0.01297	0.38803	0.486	17.82046	17	0.40025	16.98459	16	0.38659
GCST90199689	23	0.938086	1.00802	0.82602-1.2301	0.848132	0.98423	0.83644-1.15813	0.795901	0.98569	0.88374-1.09941	0.490767	0.91109	0.70221-1.18211	0.807576	0.97589	0.80379-1.18485	-0.00385	0.79465	0.856	15.97217	22	0.81726	15.90268	21	0.77509
GCST90200498	18	0.348993	1.12110	0.88878-1.4141	0.951697	0.99447	0.83113-1.18991	0.79605	0.98268	0.86076-1.12187	0.740164	1.05209	0.78312-1.41344	0.928388	1.01061	0.80549-1.26797	-0.02361	0.19449	0.584	15.86937	17	0.53311	14.03547	16	0.59607
GCST90200539	20	0.704707	0.96741	0.81730-1.1451	0.656348	0.96844	0.84086-1.11538	0.796086	0.98710	0.89453-1.08925	0.639581	0.94893	0.76466-1.17761	0.931714	0.99400	0.86773-1.13865	0.00507	0.77630	0.599	17.58867	19	0.55005	17.50547	18	0.48865
GCST90200246	29	0.694664	0.96174	0.79315-1.1662	0.950184	1.00512	0.85620-1.17995	0.797331	1.01454	0.90872-1.13267	0.672631	0.94150	0.71391-1.24163	0.838899	0.97920	0.80112-1.19688	0.00870	0.51336	0.811	21.68545	28	0.79564	21.24674	27	0.77460
GCST90200467	25	0.896431	1.01398	0.82462-1.2468	0.435479	1.06381	0.91065-1.24272	0.797639	0.98569	0.88287-1.10049	0.647514	1.07264	0.79716-1.44333	0.528757	1.09010	0.83672-1.42020	-0.00469	0.75407	0.645	20.04236	24	0.69436	19.94184	23	0.64542
GCST90200460	25	0.826453	0.97264	0.76115-1.2429	0.592938	1.04818	0.88209-1.24555	0.79766	1.01513	0.90501-1.13865	0.909002	1.01592	0.77708-1.32816	0.6615	1.04521	0.85961-1.27087	0.00576	0.70240	0.843	17.52912	24	0.82524	17.37944	23	0.79023
GCST90200380	26	0.967748	1.00344	0.85090-1.1833	0.359535	0.92772	0.79016-1.08922	0.798407	0.98665	0.88996-1.09385	0.901256	0.98375	0.76139-1.27104	0.423275	0.93413	0.79281-1.10065	-0.00316	0.79928	0.564	23.32207	25	0.55876	23.25596	24	0.50473
GCST90199721	26	0.824281	1.03177	0.78521-1.3557	0.85611	1.01703	0.84735-1.22068	0.799538	0.98253	0.85753-1.12574	0.288015	1.19147	0.86839-1.63475	0.94032	1.01008	0.77885-1.30996	-0.00650	0.68748	0.332	27.51878	25	0.33048	27.32998	24	0.28931
GCST90199863	24	0.209968	1.05891	0.97080-1.1550	0.114714	1.06562	0.98470-1.15319	0.799629	1.00949	0.93849-1.08586	0.426239	1.12580	0.84516-1.49963	0.138672	1.06311	0.98315-1.14958	-0.01599	0.08524	0.252	28.23095	23	0.20717	24.59935	22	0.31661
GCST90200155	22	0.49365	1.09089	0.85424-1.3931	0.695299	1.03563	0.86919-1.23395	0.799898	1.01669	0.89456-1.15549	0.568647	1.09605	0.80359-1.49496	0.504437	1.07651	0.87020-1.33173	-0.01044	0.51299	0.246	25.94504	21	0.20855	25.38206	20	0.18720
GCST90199778	16	0.408372	0.95063	0.84615-1.0680	0.528051	0.96732	0.87245-1.07250	0.800393	0.98873	0.90561-1.07949	0.546793	1.10455	0.80518-1.51522	0.454333	0.96323	0.87543-1.05984	0.01432	0.33095	0.394	17.07410	15	0.31445	15.92059	14	0.31825
GCST90200914	23	0.751214	0.94199	0.65415-1.3565	0.658482	0.95793	0.79170-1.15906	0.801133	0.98247	0.85619-1.12739	0.745864	0.93774	0.63880-1.37658	0.676443	0.92473	0.64346-1.32894	0.00485	0.80872	0.327	23.89486	22	0.35276	23.82667	21	0.30153
GCST90200665	26	0.7964	1.01671	0.89768-1.1515	0.691416	1.02228	0.91690-1.13977	0.801163	1.00974	0.93638-1.08885	0.79901	1.02509	0.84880-1.23800	0.777397	1.01788	0.90139-1.14943	-0.00147	0.89266	0.515	24.15440	25	0.51047	24.13569	24	0.45386
GCST90200527	26	0.80538	1.03928	0.76750-1.4073	0.76487	0.97271	0.81142-1.16606	0.801579	0.98394	0.86718-1.11641	0.579876	0.91476	0.67004-1.24887	0.68891	0.93885	0.69182-1.27411	-0.00680	0.70037	0.525	24.28366	25	0.50304	24.13115	24	0.45412
GCST90200346	25	0.229965	1.13578	0.92770-1.3905	0.849399	0.98650	0.85741-1.13504	0.801634	1.01205	0.92177-1.11117	0.253543	1.19080	0.88875-1.59549	0.624954	0.93716	0.72485-1.21164	-0.02428	0.22049	0.565	21.93086	24	0.58339	20.34459	23	0.62105
GCST90199959	26	0.582429	0.91626	0.67368-1.2462	0.200832	0.89175	0.74817-1.06288	0.801658	0.98269	0.85754-1.12610	0.298719	0.83287	0.59415-1.16751	0.171925	0.82353	0.62829-1.07943	0.00956	0.62199	0.061	35.21758	25	0.08434	34.85526	24	0.07058
GCST90200593	22	0.117703	1.31589	0.94688-1.8287	0.329327	1.09465	0.91276-1.31279	0.802103	0.98191	0.85127-1.13260	0.600386	1.08896	0.79547-1.49072	0.522526	1.08328	0.85121-1.37862	-0.03776	0.07050	0.178	27.15136	21	0.16590	22.96055	20	0.29074
GCST90199655	12	0.994565	0.99787	0.54878-1.8145	0.479397	1.08809	0.86111-1.37489	0.803135	1.02403	0.84961-1.23427	0.505389	1.14496	0.77882-1.68323	0.479639	1.14496	0.79674-1.64536	0.00292	0.93060	0.888	5.99218	11	0.87389	5.98420	10	0.81659
GCST90200069	22	0.0628767	1.38796	1.00162-1.9233	0.815419	1.02349	0.84222-1.24377	0.803646	1.01845	0.88174-1.17637	0.886014	1.02576	0.72752-1.44626	0.780993	1.03761	0.80251-1.34158	-0.04873	0.05466	0.147	28.16585	21	0.13551	23.31036	20	0.27381
GCST90200804	15	0.678186	0.92834	0.65853-1.3087	0.644233	0.95067	0.76696-1.17837	0.804166	0.98118	0.84435-1.14018	0.731079	0.93693	0.65098-1.34850	0.754724	0.94419	0.66319-1.34426	0.00805	0.73029	0.513	13.40226	14	0.49512	13.27554	13	0.42676
GCST90199652	20	0.655965	1.09988	0.72853-1.6605	0.464681	0.92461	0.74939-1.14080	0.804503	0.98126	0.84472-1.13986	0.216552	0.79862	0.56571-1.12742	0.344359	0.85958	0.63308-1.16709	-0.01650	0.56610	0.245	22.41200	19	0.26423	21.99446	18	0.23223
GCST90200854	22	0.548152	0.89861	0.63769-1.2663	0.529124	1.05966	0.88469-1.26923	0.804733	1.01692	0.89028-1.16158	0.661617	1.06497	0.80658-1.40615	0.765691	1.03551	0.82562-1.29875	0.01389	0.45140	0.421	22.24173	21	0.38570	21.60442	20	0.36236
GCST90199766	17	0.438235	0.88322	0.65064-1.1989	0.736005	0.96558	0.78768-1.18366	0.804861	0.98079	0.84093-1.14392	0.612665	0.91687	0.65952-1.27463	0.648093	0.93491	0.70406-1.24147	0.01252	0.44882	0.487	15.12747	16	0.51532	14.52259	15	0.48632
GCST90199807	23	0.154898	1.09512	0.97061-1.2356	0.240735	1.06504	0.95862-1.18326	0.80553	0.98977	0.91199-1.07419	0.207678	0.82950	0.62552-1.10000	0.232248	1.06600	0.96266-1.18044	-0.02050	0.03880	0.374	22.74502	22	0.41625	17.88650	21	0.65618
GCST90200231	23	0.505916	0.91429	0.70533-1.1852	0.912029	0.99128	0.84862-1.15793	0.805712	1.01421	0.90637-1.13487	0.219911	1.20784	0.90098-1.61920	0.555049	0.93226	0.74117-1.17262	0.01540	0.39459	0.608	19.96817	22	0.58503	19.21276	21	0.57149
GCST90200270	17	0.868451	1.03840	0.66989-1.6096	0.397741	0.90879	0.72809-1.13432	0.8075	1.02288	0.85269-1.22704	0.490414	0.85987	0.56543-1.30764	0.47791	0.85987	0.57226-1.29203	-0.00209	0.94158	0.1	23.44049	16	0.10246	23.43182	15	0.07539
GCST90200385	16	0.802192	0.94843	0.63164-1.4241	0.615778	0.95129	0.78275-1.15614	0.808153	1.01867	0.87735-1.18277	0.626414	0.92531	0.68127-1.25676	0.655435	0.93956	0.71839-1.22883	0.00765	0.71660	0.957	7.34015	15	0.94751	7.20292	14	0.92661
GCST90200614	26	0.263013	1.13977	0.91130-1.4255	0.418482	1.07100	0.90703-1.26463	0.809074	1.01389	0.90657-1.13390	0.673473	1.05743	0.81802-1.36691	0.361749	1.09694	0.90242-1.33340	-0.01751	0.24798	0.636	21.30382	25	0.67555	19.90181	24	0.70235
GCST90200943	20	0.994093	1.00190	0.61111-1.6426	0.991975	0.99884	0.79659-1.25244	0.809509	1.01947	0.87151-1.19257	0.837772	0.96234	0.66978-1.38271	0.876467	0.97175	0.68034-1.38798	0.00177	0.94283	0.734	14.88114	19	0.73012	14.87585	18	0.67047
GCST90199801	19	0.377663	1.17865	0.82591-1.6821	0.42895	1.08663	0.88446-1.33501	0.811545	1.01743	0.88273-1.17268	0.393734	1.16574	0.82644-1.64435	0.467773	1.13259	0.81508-1.57379	-0.01645	0.38891	0.706	14.63558	18	0.68682	13.85374	17	0.67743
GCST90200950	26	0.16924	0.83356	0.64804-1.0722	0.653403	0.95740	0.79172-1.15775	0.811554	0.98440	0.86502-1.12025	0.0780342	0.71254	0.49638-1.02283	0.477443	0.91418	0.71636-1.16662	0.02592	0.14757	0.167	31.98968	25	0.15831	29.25957	24	0.21051
GCST90200840	25	0.378445	1.07960	0.91342-1.2760	0.700559	1.02422	0.90660-1.15711	0.811629	1.01118	0.92285-1.10796	0.530917	1.06241	0.88154-1.28038	0.551335	1.05070	0.89497-1.23354	-0.01498	0.36799	0.175	30.68701	24	0.16301	29.60166	23	0.16118
GCST90200880	18	0.631053	0.93995	0.73357-1.2044	0.4012	0.92358	0.76711-1.11195	0.812607	1.01662	0.88708-1.16508	0.41896	0.87136	0.62907-1.20698	0.451671	0.90496	0.70192-1.16675	0.01676	0.46872	0.55	16.04197	17	0.52086	15.49110	16	0.48901
GCST90200644	32	0.497201	0.89336	0.64767-1.2322	0.771421	1.02651	0.86039-1.22470	0.812826	1.01893	0.87243-1.19003	0.434607	0.85052	0.56962-1.26994	0.577281	0.90993	0.65521-1.26368	0.01901	0.36700	0.001	58.11254	31	0.00224	56.53166	30	0.00237
GCST90200475	27	0.570475	1.07377	0.84243-1.3686	0.545978	1.04718	0.90163-1.21624	0.813224	1.01254	0.91307-1.12285	0.298119	1.17137	0.87475-1.56857	0.482727	1.09956	0.84678-1.42779	-0.00868	0.60359	0.376	27.44524	26	0.38628	27.14494	25	0.34868
GCST90200487	18	0.436759	0.86657	0.60949-1.2321	0.683186	0.95896	0.78415-1.17274	0.813385	0.98171	0.84219-1.14434	0.792103	0.95237	0.66629-1.36128	0.76313	0.95237	0.69689-1.30151	0.01747	0.45017	0.288	19.86740	17	0.28107	19.15022	16	0.26095
GCST90200618	18	0.148074	0.75815	0.53050-1.0835	0.201019	1.15916	0.92432-1.45366	0.813847	1.02081	0.86000-1.21169	0.265933	1.27138	0.84451-1.91402	0.31832	1.23984	0.82294-1.86795	0.03444	0.08618	0.199	21.61564	17	0.19996	17.87945	16	0.33100
GCST90200627	16	0.0559059	1.26730	1.01426-1.5835	0.577765	1.05110	0.88194-1.25269	0.814081	1.01729	0.88184-1.17356	0.872766	1.02057	0.79882-1.30388	0.643096	1.04137	0.88031-1.23191	-0.04081	0.03463	0.119	22.13412	15	0.10434	15.91182	14	0.31879
GCST90199935	17	0.59339	0.91382	0.66108-1.2632	0.685318	1.04186	0.85442-1.27041	0.814145	1.01718	0.88248-1.17245	0.859528	0.96546	0.65821-1.41613	0.620339	0.91343	0.64283-1.29794	0.01351	0.48041	0.492	15.83860	16	0.46428	15.30430	15	0.42973
GCST90199685	22	0.516336	0.87463	0.58783-1.3014	0.640955	1.04385	0.87158-1.25017	0.815541	0.98132	0.83752-1.14980	0.681719	1.07247	0.77122-1.49140	0.648446	1.06636	0.81220-1.40005	0.01804	0.54174	0.033	33.99145	21	0.03632	33.34882	20	0.03088
GCST90200753	19	0.923744	1.01963	0.68878-1.5094	0.82959	1.02291	0.83228-1.25719	0.815758	0.98256	0.84738-1.13930	0.63697	1.08609	0.77523-1.52159	0.924618	1.01427	0.75933-1.35480	-0.00656	0.84398	0.628	15.90663	18	0.59906	15.86669	17	0.53330
GCST90199624	18	0.778136	0.95141	0.67670-1.3376	0.710362	0.96041	0.77601-1.18863	0.816169	0.98144	0.83801-1.14940	0.713537	0.93619	0.66225-1.32345	0.796256	0.95891	0.70081-1.31206	0.00405	0.84137	0.339	19.11871	17	0.32176	19.06939	16	0.26508
GCST90200058	24	0.66353	1.04850	0.84946-1.2942	0.468872	0.94707	0.81746-1.09722	0.816402	1.01254	0.91146-1.12482	0.641852	1.07083	0.80562-1.42334	0.400898	0.93513	0.80198-1.09038	-0.00616	0.71113	0.543	20.88015	23	0.58841	20.73941	22	0.53689
GCST90200149	31	0.461177	0.94006	0.79931-1.1056	0.485337	0.96005	0.85617-1.07654	0.817001	0.99034	0.91218-1.07520	0.55733	0.94937	0.79968-1.12708	0.557629	0.96291	0.84983-1.09104	0.00954	0.47106	0.65	28.00054	30	0.57041	27.46720	29	0.54651
GCST90199840	34	0.687217	0.97317	0.85351-1.1096	0.641958	0.97229	0.86369-1.09455	0.817769	0.99049	0.91317-1.07435	0.908482	0.98496	0.76221-1.27281	0.706728	0.97622	0.86213-1.10541	0.00346	0.73924	0.839	25.23117	33	0.83142	25.11844	32	0.80120
GCST90199909	14	0.901737	1.01561	0.79827-1.2921	0.680156	1.03902	0.86613-1.24643	0.81797	0.98496	0.86570-1.12065	0.339232	1.15234	0.87082-1.52488	0.490562	1.07149	0.88541-1.29667	-0.00556	0.77266	0.681	10.16588	13	0.68032	10.07856	12	0.60907
GCST90200695	17	0.293403	1.04893	0.96251-1.1431	0.904278	1.00409	0.93954-1.07307	0.818005	0.99262	0.93189-1.05730	0.266005	0.87170	0.69018-1.10096	0.910403	1.00428	0.93332-1.08065	-0.02315	0.08370	0.572	15.52485	16	0.48658	12.09221	15	0.67204
GCST90199841	35	0.668565	1.01687	0.94255-1.0970	0.829624	0.99156	0.91792-1.07112	0.818111	0.99377	0.94222-1.04814	0.290217	0.91718	0.78336-1.07386	0.88314	1.00518	0.93872-1.07635	-0.00783	0.41088	0.657	29.87692	34	0.67002	29.18318	33	0.65773
GCST90200260	18	0.377038	1.20126	0.80882-1.7841	0.58327	1.06040	0.85995-1.30759	0.818183	0.97968	0.82235-1.16710	0.765753	1.05138	0.76012-1.45426	0.635804	1.06719	0.81931-1.39007	-0.02631	0.27735	0.113	24.59029	17	0.10426	22.78896	16	0.11949
GCST90200761	26	0.311957	1.13238	0.89441-1.4337	0.594209	1.04368	0.89177-1.22148	0.819422	1.01293	0.90713-1.13107	0.496567	1.09640	0.84416-1.42401	0.32843	1.11813	0.89772-1.39265	-0.01429	0.30520	0.864	17.78479	25	0.85139	16.68704	24	0.86170
GCST90200921	21	0.697726	0.91816	0.60062-1.4036	0.429665	0.92398	0.75935-1.12430	0.82061	0.98360	0.85261-1.13471	0.498529	0.89394	0.64994-1.22956	0.562552	0.91315	0.67486-1.23558	0.00810	0.73929	0.923	11.78793	20	0.92318	11.67389	19	0.89909
GCST90200291	21	0.689874	1.08603	0.72856-1.6189	0.836666	0.97891	0.79934-1.19882	0.820958	0.98251	0.84326-1.14475	0.749233	0.94149	0.65385-1.35569	0.876155	1.02560	0.74933-1.40372	-0.01233	0.59948	0.311	22.76805	20	0.30033	22.43128	19	0.26332
GCST90200074	24	0.349904	1.06643	0.93457-1.2169	0.518784	1.03415	0.93385-1.14523	0.821649	1.01023	0.92466-1.10372	0.387209	1.07238	0.91805-1.25265	0.396582	1.04054	0.95083-1.13870	-0.01540	0.29161	0.131	31.77801	23	0.10485	30.17651	22	0.11424
GCST90200859	23	0.234026	0.82581	0.60803-1.1216	0.567478	0.94910	0.79348-1.13524	0.823121	1.01606	0.88358-1.16840	0.744626	0.94641	0.68227-1.31283	0.192574	0.82644	0.62590-1.09125	0.02823	0.15328	0.243	25.60560	22	0.26900	23.18214	21	0.33434
GCST90200520	28	0.989859	1.00144	0.80432-1.2469	0.7225	1.02641	0.88887-1.18523	0.823707	1.01153	0.91450-1.11885	0.152629	1.21933	0.93634-1.58785	0.30508	1.12222	0.90405-1.39304	0.00169	0.92034	0.63	23.76924	27	0.64308	23.75904	26	0.58974
GCST90200817	25	0.226988	1.19578	0.90167-1.5858	0.39259	1.07854	0.90689-1.28268	0.823928	1.01588	0.88426-1.16708	0.41137	1.14496	0.83361-1.57259	0.462994	1.11827	0.83364-1.50007	-0.02372	0.20844	0.168	30.57481	24	0.16642	28.49935	23	0.19749
GCST90200752	17	0.18597	0.81912	0.61776-1.0861	0.516691	0.93956	0.77818-1.13440	0.825135	1.01810	0.86830-1.19375	0.844539	0.97112	0.72800-1.29545	0.778312	0.96603	0.76251-1.22387	0.04571	0.09521	0.06	25.59874	16	0.05994	21.13147	15	0.13268
GCST90200741	22	0.627412	0.90536	0.60972-1.3443	0.940664	1.00819	0.81341-1.24960	0.82549	0.98156	0.83188-1.15817	0.846968	0.95809	0.62358-1.47204	0.97348	1.00633	0.69664-1.45371	0.00888	0.66248	0.171	27.52737	21	0.15407	27.25983	20	0.12811
GCST90200151	25	0.0496746	1.38076	1.01757-1.8736	0.856711	0.98359	0.82192-1.17707	0.825811	0.98585	0.86834-1.11926	0.849422	0.96474	0.66867-1.39190	0.979766	0.99574	0.71844-1.38008	-0.04228	0.02606	0.526	22.72251	24	0.53622	17.06388	23	0.80610
GCST90200349	25	0.525032	1.05480	0.89704-1.2403	0.524153	1.04892	0.90556-1.21497	0.827658	0.98809	0.88703-1.10066	0.828772	1.03337	0.76994-1.38694	0.675319	1.02717	0.90747-1.16265	-0.01343	0.30125	0.141	33.39501	24	0.09601	31.84647	23	0.10338
GCST90200457	22	0.48469	0.90109	0.67647-1.2003	0.995223	1.00061	0.82002-1.22097	0.827923	1.01524	0.88582-1.16357	0.518869	1.13031	0.78394-1.62971	0.648077	1.06226	0.82263-1.37171	0.01638	0.36455	0.325	23.21981	21	0.33237	22.26154	20	0.32649
GCST90199919	19	0.463366	0.93458	0.78317-1.1153	0.679567	0.97361	0.85755-1.10537	0.828045	1.01151	0.91230-1.12150	0.452365	1.10278	0.85915-1.41550	0.580109	0.96494	0.85226-1.09251	0.01742	0.29608	0.199	22.57638	18	0.20740	21.13177	17	0.22045
GCST90200806	18	0.0513479	1.32150	1.01951-1.7129	0.811559	1.02100	0.86063-1.21127	0.828221	0.98527	0.86165-1.12663	0.506504	1.09605	0.84100-1.42845	0.606101	1.05548	0.86292-1.29101	-0.04229	0.02403	0.238	21.81938	17	0.19177	15.60665	16	0.48073
GCST90200403	30	0.859911	1.01949	0.82439-1.2608	0.258975	0.91324	0.78010-1.06911	0.829202	0.98794	0.88478-1.10312	0.319195	0.85145	0.62387-1.16204	0.319416	0.86862	0.66143-1.14072	-0.00471	0.73681	0.854	20.87194	29	0.86377	20.75672	28	0.83534
GCST90199901	28	0.98932	0.99801	0.74771-1.3321	0.682462	0.96288	0.80329-1.15418	0.829324	0.98664	0.87306-1.11500	0.379208	1.17984	0.82104-1.69543	0.823962	0.96552	0.71084-1.31143	-0.00125	0.93222	0.544	25.05086	27	0.57161	25.04348	26	0.51651
GCST90200020	25	0.708147	1.09353	0.68871-1.7363	0.778647	0.97004	0.78466-1.19922	0.82983	0.98010	0.81597-1.17725	0.174997	1.32297	0.89351-1.95885	0.220247	1.27644	0.87285-1.86664	-0.01280	0.61687	0.011	44.28518	24	0.00707	43.79541	23	0.00557
GCST90200488	33	0.11518	0.86002	0.71666-1.0321	0.683401	0.97387	0.85751-1.10602	0.82985	0.98731	0.87874-1.10929	0.803521	1.03155	0.80925-1.31493	0.823957	0.98608	0.87237-1.11461	0.02695	0.06936	0.002	66.08535	32	0.00037	59.31377	31	0.00162
GCST90200657	28	0.843186	1.02329	0.81642-1.2826	0.528822	0.95016	0.81038-1.11404	0.830549	0.98721	0.87743-1.11073	0.472749	1.10590	0.84345-1.45001	0.412487	0.91792	0.75028-1.12302	-0.00585	0.71622	0.165	34.57777	27	0.14989	34.39908	26	0.12527
GCST90200795	28	0.99123	0.99912	0.85590-1.1663	0.241045	1.05869	0.96241-1.16461	0.832763	1.01073	0.91543-1.11594	0.380993	0.88711	0.68154-1.15468	0.476286	1.03741	0.93902-1.14610	0.00261	0.84859	0.023	48.80172	27	0.00624	48.73202	26	0.00444
GCST90200415	36	0.970171	1.00463	0.78991-1.2777	0.686972	0.96990	0.83595-1.12533	0.833088	0.98860	0.88860-1.09986	0.598888	1.06505	0.84395-1.34406	0.846145	0.98483	0.84491-1.14793	-0.00222	0.88413	0.065	47.82185	35	0.07284	47.79154	34	0.05858
GCST90200386	27	0.310173	1.15616	0.87858-1.5214	0.694341	1.03213	0.88151-1.20849	0.835625	0.98685	0.87084-1.11831	0.797089	0.96470	0.73556-1.26521	0.759585	0.96470	0.76819-1.21147	-0.02230	0.21718	0.112	35.11234	26	0.10924	32.99691	25	0.13115
GCST90199946	20	0.0888014	1.24990	0.98024-1.5937	0.0743726	1.16663	0.98494-1.38183	0.836122	1.01395	0.88924-1.15614	0.183052	1.21630	0.92134-1.60570	0.144213	1.21630	0.94537-1.56488	-0.03920	0.06647	0.265	22.04243	19	0.28215	18.18647	18	0.44343
GCST90200495	11	0.617831	1.08906	0.78796-1.5052	0.590671	1.06488	0.84687-1.33900	0.83673	1.01906	0.85152-1.21958	0.483176	1.13938	0.80195-1.61880	0.519965	1.11283	0.81276-1.52371	-0.01270	0.64019	0.864	5.55168	10	0.85142	5.31777	9	0.80577
GCST90200461	24	0.671526	1.06128	0.80917-1.3919	0.414652	0.93015	0.78161-1.10691	0.837593	0.98688	0.86982-1.11970	0.607911	0.92623	0.69393-1.23629	0.322677	0.89433	0.72018-1.11060	-0.01155	0.55737	0.295	26.42995	23	0.28099	26.01022	22	0.25124
GCST90200167	29	0.083451	1.37499	0.97162-1.9458	0.926651	1.00904	0.83302-1.22226	0.838567	1.01546	0.87613-1.17695	0.790331	1.04931	0.73836-1.49123	0.94699	0.98978	0.73326-1.33606	-0.03988	0.07190	0.071	40.57397	28	0.05873	35.90741	27	0.11734
GCST90199781	26	0.908895	0.99271	0.87688-1.1238	0.922644	0.99514	0.90195-1.09796	0.839566	1.00755	0.93680-1.08364	0.0176387	1.29277	1.06047-1.57596	0.823628	1.01031	0.92406-1.10461	0.00547	0.77242	0.062	34.80198	25	0.09185	34.67836	24	0.07331
GCST90199854	29	0.358445	1.11095	0.89091-1.3853	0.323791	1.07713	0.92933-1.24842	0.839692	0.98938	0.89216-1.09720	0.220364	0.81179	0.58595-1.12468	0.206289	1.16908	0.92272-1.48121	-0.01650	0.25425	0.71	22.54683	28	0.75537	21.18985	27	0.77732
GCST90199783	26	0.811139	0.98228	0.84968-1.1356	0.739744	0.98349	0.89149-1.08499	0.840394	0.99033	0.90094-1.08858	0.40937	1.12744	0.85194-1.49202	0.840874	1.01063	0.91253-1.11927	0.00193	0.88383	0.045	40.09071	25	0.02854	40.05431	24	0.02110
GCST90200435	25	0.788708	1.03264	0.81870-1.3025	0.997303	1.00030	0.84300-1.18695	0.841169	1.01205	0.90014-1.13788	0.503387	1.11019	0.82116-1.50096	0.876619	1.01356	0.85665-1.19920	-0.00296	0.84454	0.474	24.79717	24	0.41685	24.75484	23	0.36305
GCST90200639	22	0.260909	0.84181	0.62881-1.1270	0.653251	0.96146	0.80996-1.14130	0.841864	0.98789	0.87645-1.11350	0.776159	1.04692	0.76629-1.43034	0.806996	0.96579	0.73303-1.27246	0.02091	0.25226	0.602	18.70833	21	0.60384	17.31844	20	0.63221
GCST90199875	20	0.770309	1.04877	0.76548-1.4369	0.296023	1.12541	0.90172-1.40460	0.844235	1.01521	0.87329-1.18020	0.873198	1.02845	0.73206-1.44486	0.665159	1.07515	0.77836-1.48510	-0.00405	0.82029	0.596	16.67646	19	0.61178	16.62332	18	0.54913
GCST90200131	25	0.692435	1.04457	0.84387-1.2930	0.656337	0.96929	0.84488-1.11203	0.844589	0.98824	0.87800-1.11233	0.898813	1.01470	0.81220-1.26769	0.82233	1.01470	0.89457-1.15097	-0.01123	0.54425	0.018	42.32867	24	0.01185	41.64271	23	0.00999
GCST90200486	17	0.547328	1.09339	0.82289-1.4528	0.960385	1.00402	0.85701-1.17625	0.844806	1.01544	0.87103-1.18380	0.86651	0.97476	0.72695-1.30704	0.789914	0.96263	0.73078-1.26803	-0.01700	0.55034	0.003	38.41545	16	0.00132	37.48255	15	0.00108
GCST90200316	23	0.765324	1.02761	0.86130-1.2260	0.460666	1.04250	0.93337-1.16439	0.845395	0.98912	0.88616-1.10405	0.751131	1.04699	0.79110-1.38565	0.512886	1.04014	0.92625-1.16802	-0.00893	0.58994	0.036	38.98216	22	0.01418	38.43394	21	0.01146
GCST90199943	22	0.331419	1.15288	0.87123-1.5256	0.803311	0.97512	0.79976-1.18893	0.845477	0.98640	0.85951-1.13203	0.855513	1.03780	0.69952-1.53965	0.895016	0.97798	0.70540-1.35589	-0.02622	0.22645	0.304	23.38992	21	0.32355	21.70007	20	0.35700
GCST90200697	23	0.695196	1.02130	0.92042-1.1332	0.733385	1.01303	0.94029-1.09140	0.845925	1.00671	0.94103-1.07698	0.679794	0.95657	0.77687-1.17783	0.733333	1.01120	0.94923-1.07721	-0.00570	0.72113	0.081	34.55812	22	0.04306	34.34406	21	0.03328
GCST90200185	27	0.443344	1.03859	0.94420-1.1424	0.890513	1.00676	0.91469-1.10809	0.846381	1.00703	0.93811-1.08102	0.42089	0.90712	0.71814-1.14584	0.921866	1.00426	0.92324-1.09239	-0.00914	0.35114	0.795	21.48616	26	0.71646	20.58342	25	0.71559
GCST90200451	26	0.905889	1.01821	0.75725-1.3691	0.486133	0.93424	0.77147-1.13134	0.848775	0.98667	0.85956-1.13258	0.794014	1.05290	0.71797-1.54408	0.999987	1.00000	0.74280-1.34625	-0.00468	0.81492	0.301	28.31373	25	0.29361	28.24781	24	0.24973
GCST90199681	22	0.876285	0.98759	0.84556-1.1535	0.513661	1.04697	0.91225-1.20158	0.849182	1.00963	0.91464-1.11449	0.835273	0.97236	0.74901-1.26230	0.814839	1.01534	0.89531-1.15145	0.00543	0.71766	0.199	26.70418	21	0.18086	26.52579	20	0.14914
GCST90200903	18	0.722889	1.09729	0.66275-1.8167	0.50712	0.91903	0.71611-1.17945	0.849613	0.98279	0.82135-1.17596	0.775462	0.93144	0.57617-1.50577	0.738781	0.92665	0.59650-1.43953	-0.01376	0.65168	0.313	19.71245	17	0.28920	19.45513	16	0.24577
GCST90200860	14	0.476937	1.13630	0.80788-1.5982	0.804971	0.97424	0.79198-1.19846	0.850594	0.98524	0.84404-1.15007	0.808001	0.95941	0.69148-1.33115	0.816457	0.96572	0.72362-1.28883	-0.02003	0.37590	0.833	8.52519	13	0.80778	7.67954	12	0.80964
GCST90200515	22	0.8924	0.98183	0.75524-1.2764	0.95882	1.00466	0.84206-1.19867	0.850751	0.98792	0.87047-1.12123	0.640613	1.07682	0.79275-1.46269	0.816286	0.97251	0.77099-1.22671	0.00096	0.95811	0.394	22.08745	21	0.39449	22.08432	20	0.33595
GCST90200949	16	0.162876	0.86424	0.71173-1.0494	0.904773	1.00970	0.86198-1.18273	0.854232	1.01120	0.89795-1.13873	0.709084	0.95256	0.74147-1.22374	0.812148	0.97687	0.80816-1.18081	0.03627	0.07560	0.311	17.82164	15	0.27216	14.10996	14	0.44155
GCST90200342	29	0.605101	0.93803	0.73815-1.1920	0.98277	1.00180	0.85096-1.17938	0.855149	1.01097	0.89921-1.13662	0.927483	1.01533	0.73378-1.40492	0.438454	0.92680	0.76678-1.12022	0.01110	0.48741	0.292	31.75309	28	0.28467	31.18060	27	0.26379
GCST90200535	24	0.55283	1.08167	0.83797-1.3963	0.998831	0.99988	0.85101-1.17479	0.856213	1.01006	0.90644-1.12552	0.612746	1.07732	0.81059-1.43182	0.804104	1.02663	0.83609-1.26060	-0.01188	0.56637	0.499	22.84754	23	0.46970	22.50090	22	0.43035
GCST90200769	26	0.270368	1.16920	0.89115-1.5340	0.987087	0.99846	0.82892-1.20269	0.856608	0.98877	0.87479-1.11760	0.444454	0.90128	0.69341-1.17146	0.760451	0.97285	0.81667-1.15890	-0.02666	0.18790	0.721	21.31386	25	0.67498	19.47668	24	0.72611
GCST90200715	32	0.469971	0.93279	0.77419-1.1239	0.235589	0.90978	0.77817-1.06364	0.857641	1.01064	0.90030-1.13449	0.832079	1.03642	0.74669-1.43857	0.224368	0.89065	0.74164-1.06959	0.01245	0.29173	0.144	37.85952	31	0.18474	36.45969	30	0.19341
GCST90200459	22	0.556005	0.90800	0.66207-1.2453	0.280963	1.11528	0.91463-1.35996	0.858076	1.01267	0.88212-1.16255	0.416209	1.15465	0.82200-1.62192	0.334497	1.16684	0.85911-1.58480	0.01486	0.46044	0.578	19.14862	21	0.57561	18.58218	20	0.54911
GCST90200308	19	0.884904	0.97578	0.70359-1.3533	0.718542	0.96483	0.79415-1.17221	0.858081	0.98687	0.85374-1.14075	0.400182	0.85402	0.59647-1.22278	0.407508	0.86518	0.61909-1.20908	0.00157	0.94067	0.916	10.64803	18	0.90869	10.64232	17	0.87454
GCST90200318	15	0.514708	1.07918	0.86348-1.3488	0.641844	1.03789	0.88733-1.21400	0.858082	1.01107	0.89613-1.14076	0.5062	1.08909	0.85229-1.39168	0.592848	1.05728	0.86605-1.29075	-0.01090	0.50755	0.953	6.77919	14	0.94289	6.31482	13	0.93394
GCST90200400	24	0.967299	0.99276	0.70416-1.3996	0.944909	1.00668	0.83339-1.21601	0.858536	1.01349	0.87459-1.17446	0.45211	1.15080	0.80296-1.64931	0.814034	1.04047	0.75042-1.44262	0.00280	0.89677	0.102	30.23212	23	0.14285	30.20847	22	0.11348
GCST90200587	29	0.819126	1.03651	0.76453-1.4052	0.886602	0.98835	0.84132-1.16107	0.859153	0.98904	0.87568-1.11707	0.955766	1.01006	0.71141-1.43407	0.969948	0.99360	0.71341-1.38382	-0.00614	0.74364	0.081	39.53419	28	0.07271	39.37498	27	0.05855
GCST90200019	25	0.957169	1.00409	0.86658-1.1634	0.954668	0.99640	0.87999-1.12822	0.85944	1.00864	0.91704-1.10938	0.713699	0.96154	0.78171-1.18273	0.899667	0.99166	0.87174-1.12807	0.00106	0.93782	0.934	15.20003	24	0.91477	15.19381	23	0.88755
GCST90200570	18	0.528437	0.94650	0.80074-1.1188	0.79476	0.98412	0.87228-1.11029	0.862904	1.00820	0.91892-1.10615	0.467156	1.07870	0.88349-1.31704	0.799043	0.98515	0.87954-1.10344	0.01356	0.38698	0.621	15.62577	17	0.55050	14.83478	16	0.53677
GCST90199767	32	0.788891	0.96826	0.76622-1.2236	0.624001	1.04085	0.88687-1.22156	0.864047	0.99035	0.88630-1.10661	0.414251	0.87518	0.63819-1.20016	0.442851	0.90860	0.71353-1.15700	0.00293	0.83152	0.623	27.81136	31	0.63089	27.76530	30	0.58287
GCST90200778	22	0.754448	0.95192	0.70201-1.2908	0.526332	0.94107	0.77989-1.13557	0.864748	0.98813	0.86124-1.13371	0.506005	0.88983	0.63455-1.24780	0.469504	0.89631	0.66983-1.19937	0.00490	0.79052	0.85	14.69296	21	0.83804	14.62048	20	0.79770
GCST90200507	16	0.530954	1.09015	0.83776-1.4186	0.833934	0.98268	0.83460-1.15704	0.865676	1.01101	0.89055-1.14776	0.896238	1.01928	0.76869-1.35156	0.896433	0.98975	0.84974-1.15283	-0.01377	0.52991	0.406	16.98404	15	0.31982	16.49520	14	0.28408
GCST90199983	35	0.0279475	1.32350	1.04224-1.6807	0.537644	1.05962	0.88140-1.27387	0.866643	1.01020	0.89733-1.13727	0.333654	1.13719	0.87953-1.47034	0.390096	1.09690	0.89070-1.35084	-0.04206	0.01552	0.701	29.99764	34	0.66424	23.48453	33	0.88940
GCST90199857	22	0.521381	1.07671	0.86240-1.3443	0.86518	1.01125	0.88874-1.15064	0.866706	1.00908	0.90804-1.12135	0.576385	0.92878	0.71961-1.19876	0.845015	0.98262	0.82602-1.16891	-0.01661	0.52064	0.054	31.91541	21	0.05971	31.24742	20	0.05201
GCST90200723	21	0.341228	1.14065	0.87579-1.4856	0.457118	1.05883	0.91073-1.23102	0.867997	1.01003	0.89787-1.13621	0.772808	0.95489	0.70096-1.30082	0.423404	1.07841	0.89984-1.29241	-0.02048	0.32631	0.144	26.52643	20	0.14912	25.18091	19	0.15467
GCST90199904	27	0.0460355	1.32318	1.01878-1.7185	0.980971	1.00223	0.83480-1.20323	0.868392	1.01131	0.88531-1.15525	0.790401	0.95519	0.68358-1.33473	0.806492	1.04000	0.76232-1.41882	-0.03439	0.03101	0.2	31.57957	26	0.20739	26.12031	25	0.40120
GCST90200977	22	0.591728	0.91983	0.68109-1.2423	0.17959	0.89489	0.76091-1.05247	0.86906	0.98836	0.85994-1.13596	0.170109	0.83608	0.65309-1.07034	0.168183	0.87683	0.73203-1.05027	0.01288	0.60096	0.048	33.63959	21	0.03959	33.17115	20	0.03231
GCST90200743	32	0.552283	0.90656	0.65839-1.2483	0.502198	1.05900	0.89573-1.25204	0.869445	0.99024	0.88099-1.11305	0.481213	1.11653	0.82465-1.51171	0.430365	1.10055	0.87004-1.39212	0.00969	0.56541	0.894	21.68214	31	0.89274	21.34429	30	0.87681
GCST90200135	31	0.872074	1.01542	0.84424-1.2213	0.395837	0.94481	0.82876-1.07711	0.870858	0.99143	0.89374-1.09981	0.835562	1.03201	0.76841-1.38603	0.245323	0.91484	0.78961-1.05994	-0.00446	0.75949	0.022	46.27936	30	0.02922	46.12744	29	0.02279
GCST90199693	15	0.905306	0.98368	0.75398-1.2834	0.93463	0.99210	0.82079-1.19916	0.872692	1.01116	0.88277-1.15823	0.45302	1.12681	0.83213-1.52583	0.78529	0.97064	0.78656-1.19781	0.00401	0.81476	0.434	13.93794	14	0.45434	13.87691	13	0.38257
GCST90199851	39	0.682216	1.02177	0.92244-1.1318	0.635789	1.02614	0.92220-1.14181	0.873265	1.00596	0.93511-1.08218	0.442617	0.91856	0.74115-1.13843	0.601528	1.02198	0.94254-1.10810	-0.00349	0.66840	0.367	42.03604	38	0.30034	41.82529	37	0.26926
GCST90200327	23	0.685273	1.08108	0.74537-1.5680	0.680223	1.04354	0.85208-1.27803	0.874308	1.01195	0.87342-1.17246	0.6572	1.09444	0.73866-1.62157	0.960131	0.99009	0.67299-1.45659	-0.00781	0.70721	0.337	24.13376	22	0.34026	23.96830	21	0.29460
GCST90199880	27	0.565432	0.95635	0.82302-1.1113	0.889488	0.99195	0.88509-1.11172	0.875413	1.00671	0.92594-1.09452	0.91477	1.01148	0.82228-1.24423	0.938501	0.99603	0.90121-1.10083	0.01268	0.42755	0.991	14.25777	26	0.96945	13.60729	25	0.96815
GCST90200959	22	0.406037	1.13111	0.85105-1.5033	0.662149	1.03994	0.87241-1.23964	0.875916	1.01003	0.89106-1.14490	0.991417	0.99839	0.74653-1.33521	0.878659	1.02089	0.78541-1.32697	-0.01633	0.39522	0.7	16.88504	21	0.71805	16.13010	20	0.70852
GCST90200444	29	0.965482	1.00565	0.78086-1.2952	0.605755	0.96390	0.83828-1.10834	0.876103	0.99101	0.88469-1.11012	0.822482	0.96956	0.74197-1.26696	0.470958	0.94947	0.82620-1.09113	-0.00225	0.89932	0.036	44.17325	28	0.02671	44.14658	27	0.01997
GCST90200141	29	0.574084	0.91717	0.68091-1.2354	0.488207	1.06007	0.89887-1.25018	0.876826	1.01003	0.89031-1.14584	0.7443	1.06690	0.72575-1.56841	0.486736	1.12219	0.81441-1.54628	0.01284	0.48870	0.089	38.97869	28	0.08127	38.28005	27	0.07354
GCST90199819	34	0.338922	1.08651	0.91893-1.2847	0.541192	1.04214	0.91291-1.18966	0.876985	1.00748	0.91673-1.10723	0.919245	1.01224	0.80150-1.27840	0.439142	1.05960	0.91668-1.22479	-0.01228	0.29328	0.29	37.00535	33	0.28919	35.73050	32	0.29736
GCST90200584	33	0.33055	0.87726	0.67664-1.1373	0.837647	0.98302	0.83444-1.15804	0.877124	0.98973	0.86830-1.12813	0.72329	0.92792	0.61550-1.39892	0.775855	0.94795	0.65816-1.36534	0.01637	0.30015	0.053	44.86947	32	0.06505	43.31795	31	0.06980
GCST90199700	11	0.514215	1.22630	0.68054-2.2098	0.451723	1.11805	0.83607-1.49514	0.87753	1.02037	0.78949-1.31878	0.406636	1.28153	0.73112-2.24630	0.392136	1.16676	0.83214-1.63592	-0.02974	0.51103	0.068	18.64736	10	0.04498	17.72517	9	0.03850
GCST90200620	20	0.392445	1.18082	0.81418-1.7126	0.73668	1.03616	0.84238-1.27452	0.879369	0.98681	0.83127-1.17145	0.25673	0.74769	0.45926-1.21727	0.254301	1.25662	0.85862-1.83912	-0.02798	0.30072	0.024	32.24704	19	0.02931	30.33372	18	0.03433
GCST90200080	25	0.167888	0.81572	0.61628-1.0797	0.967579	0.99671	0.85008-1.16863	0.882073	1.00813	0.90582-1.12200	0.95502	1.00815	0.76253-1.33290	0.975485	0.99637	0.79200-1.25347	0.02880	0.12284	0.453	23.89441	24	0.46765	21.32849	23	0.56103
GCST90199927	15	0.389918	1.16924	0.82847-1.6502	0.767948	0.97067	0.79652-1.18290	0.883829	1.01070	0.87621-1.16584	0.513158	0.88515	0.61978-1.26413	0.231925	1.24017	0.88483-1.73821	-0.02247	0.37897	0.806	9.17288	14	0.81982	8.34330	13	0.82054
GCST90200865	23	0.531668	1.11992	0.78995-1.5877	0.948748	0.99357	0.81614-1.20957	0.884239	1.01047	0.87829-1.16255	0.880053	0.97122	0.66753-1.41307	0.965662	0.99216	0.69605-1.41424	-0.01195	0.53511	0.642	18.78030	22	0.65885	18.38266	21	0.62468
GCST90201010	15	0.938276	1.02667	0.53412-1.9734	0.900613	0.98331	0.75510-1.28050	0.886173	0.98578	0.81024-1.19935	0.237799	1.38083	0.82682-2.30606	0.520289	0.87149	0.57905-1.31161	-0.00456	0.89989	0.218	18.13182	14	0.20084	18.10890	13	0.15343
GCST90199974	25	0.487624	0.88338	0.62593-1.2467	0.664386	1.04195	0.86542-1.25449	0.88645	1.00961	0.88538-1.15128	0.974033	0.99420	0.70276-1.40650	0.835481	1.03640	0.74226-1.44711	0.01762	0.41904	0.398	25.26587	24	0.39143	24.54336	23	0.37425
GCST90200245	23	0.595208	1.05044	0.87848-1.2561	0.696684	1.02741	0.89681-1.17701	0.886536	0.99288	0.90006-1.09527	0.643325	1.06718	0.81350-1.39997	0.602645	1.03827	0.90320-1.19355	-0.01114	0.46795	0.614	19.97386	22	0.58467	19.42739	21	0.55774
GCST90199761	28	0.482665	0.87402	0.60338-1.2660	0.624249	0.95469	0.79301-1.14933	0.886666	1.00969	0.88432-1.15283	0.784071	0.94818	0.65047-1.38215	0.862267	0.96701	0.66434-1.40757	0.01485	0.42116	0.67	23.36859	27	0.66506	22.70056	26	0.64983
GCST90200643	22	0.600433	1.06568	0.84311-1.3470	0.980823	1.00227	0.83308-1.20582	0.886757	1.00887	0.89345-1.13919	0.717604	0.94651	0.70547-1.26992	0.871687	0.98277	0.79790-1.21047	-0.00915	0.59780	0.583	19.66917	21	0.54229	19.38177	20	0.49715
GCST90200976	27	0.598798	0.92924	0.70941-1.2172	0.875504	0.98734	0.84190-1.15791	0.8876	0.99159	0.88205-1.11475	0.617331	0.93619	0.72507-1.20879	0.674618	0.95314	0.76373-1.18952	0.00836	0.60530	0.96	15.73405	26	0.94239	15.46010	25	0.92996
GCST90199755	32	0.336028	1.09976	0.90889-1.3307	0.579886	1.04227	0.90014-1.20685	0.88779	1.00694	0.91476-1.10840	0.804005	1.03583	0.78626-1.36461	0.732582	1.03926	0.83495-1.29356	-0.01279	0.30233	0.513	29.71435	31	0.53208	28.61292	30	0.53799
GCST90200632	16	0.764359	1.05935	0.73195-1.5332	0.969501	1.00395	0.82039-1.22858	0.888046	1.01109	0.86712-1.17898	0.747718	0.94579	0.67762-1.32009	0.957716	0.99155	0.72842-1.34975	-0.00584	0.78979	0.756	11.15492	15	0.74154	11.08108	14	0.67965
GCST90199669	21	0.655769	0.90090	0.57348-1.4153	0.951814	1.00719	0.79844-1.27050	0.888143	1.01430	0.83220-1.23625	0.395448	1.17604	0.81562-1.69573	0.685371	1.05385	0.82068-1.35327	0.01855	0.57222	0.035	34.36254	20	0.02377	33.77538	19	0.01953
GCST90200496	15	0.45279	0.88102	0.63924-1.2142	0.911669	1.00951	0.85410-1.19319	0.888485	0.98991	0.85914-1.14060	0.197551	1.27979	0.89519-1.82961	0.81144	1.02700	0.82848-1.27310	0.02556	0.44019	0.059	22.68768	14	0.06555	21.63264	13	0.06132
GCST90199701	24	0.68566	1.05700	0.81101-1.3776	0.496491	0.93687	0.77635-1.13058	0.889136	1.01101	0.86676-1.17926	0.71859	0.94304	0.68817-1.29232	0.602163	0.94304	0.75874-1.17212	-0.00770	0.68694	0.075	33.94840	23	0.06591	33.69299	22	0.05277
GCST90200338	22	0.95426	0.99261	0.77270-1.2751	0.869322	1.01466	0.85314-1.20676	0.890449	0.98983	0.85582-1.14482	0.63047	0.91331	0.63460-1.31442	0.976559	0.99662	0.79736-1.24567	-0.00058	0.97851	0.054	33.38286	21	0.04214	33.38162	20	0.03063
GCST90199789	16	0.76589	1.13614	0.49841-2.5899	0.681565	0.95070	0.74675-1.21036	0.891482	1.01976	0.76981-1.35088	0.773657	0.94039	0.62327-1.41889	0.646318	0.92785	0.67819-1.26941	-0.01408	0.78759	<0.001	51.03218	15	0.00001	50.75867	14	0.00000
GCST90200334	23	0.20443	1.22961	0.90247-1.6754	0.611554	1.05335	0.86191-1.28730	0.891805	1.01012	0.87368-1.16788	0.390008	1.16414	0.82885-1.63505	0.381644	1.15002	0.84612-1.56309	-0.02945	0.17537	0.153	28.09073	22	0.17269	25.68484	21	0.21872
GCST90200727	14	0.861259	0.97062	0.69964-1.3465	0.817113	0.97755	0.80640-1.18501	0.892251	0.99038	0.86117-1.13899	0.499323	0.89082	0.64296-1.23424	0.611158	0.91832	0.66644-1.26539	0.00283	0.89599	0.562	12.03387	13	0.52487	12.01602	12	0.44439
GCST90200560	17	0.667402	0.88228	0.50395-1.5446	0.314134	1.11062	0.90540-1.36235	0.892955	0.98788	0.82714-1.17986	0.409086	1.15344	0.82920-1.60448	0.386497	1.14738	0.84774-1.55293	0.01453	0.68155	0.073	25.26019	16	0.06537	24.96872	15	0.05037
GCST90200986	30	0.982386	0.99741	0.79380-1.2532	0.190545	1.10066	0.95342-1.27064	0.893225	0.99223	0.88544-1.11190	0.353693	0.86577	0.64155-1.16835	0.27126	1.08458	0.94111-1.24992	-0.00084	0.95903	0.036	44.13300	29	0.03565	44.12877	28	0.02698
GCST90200107	31	0.520111	1.04459	0.91603-1.1912	0.597901	1.03283	0.91601-1.16454	0.894585	1.00616	0.91879-1.10184	0.496071	1.10423	0.83288-1.46397	0.56924	1.03470	0.92123-1.16214	-0.00832	0.44205	0.28	35.69056	30	0.21838	34.95827	29	0.20591
GCST90200301	32	0.421084	1.09362	0.88203-1.3560	0.921481	1.00712	0.87459-1.15973	0.894737	1.00717	0.90598-1.11966	0.977367	1.00321	0.80560-1.24929	0.982811	0.99815	0.84481-1.17933	-0.01215	0.39470	0.105	41.22138	31	0.10374	40.22164	30	0.10064
GCST90199990	23	0.658739	1.07056	0.79444-1.4427	0.892558	0.98672	0.81270-1.19799	0.895191	0.99076	0.86292-1.13753	0.767174	0.94400	0.64765-1.37596	0.790546	0.95214	0.66593-1.36136	-0.00993	0.57186	0.721	17.33703	22	0.74449	17.00719	21	0.71067
GCST90199649	23	0.885658	1.02260	0.75682-1.3817	0.473376	0.94495	0.80945-1.10314	0.895581	0.99112	0.86755-1.13229	0.880459	0.97734	0.72750-1.31300	0.461306	0.94102	0.80277-1.10309	-0.00539	0.82161	0.009	39.90825	22	0.01108	39.80943	21	0.00784
GCST90200394	22	0.595461	1.06792	0.84114-1.3558	0.310805	1.08029	0.93042-1.25431	0.897561	0.99278	0.88913-1.10852	0.463111	1.10979	0.84451-1.45840	0.41614	1.11642	0.86064-1.44823	-0.01206	0.50716	0.706	16.55312	21	0.73781	16.09696	20	0.71059
GCST90199683	29	0.502208	0.91113	0.69678-1.1914	0.227998	0.90343	0.76593-1.06562	0.898482	1.00782	0.89416-1.13593	0.48416	0.88994	0.64472-1.22841	0.503479	0.90329	0.67310-1.21219	0.01385	0.41674	0.376	29.37925	28	0.39349	28.65729	27	0.37771
GCST90200491	27	0.706409	1.04911	0.81980-1.3426	0.118931	1.14942	0.96485-1.36930	0.899174	0.99216	0.87842-1.12062	0.297049	1.19890	0.85837-1.67453	0.271702	1.19072	0.87801-1.61481	-0.00732	0.61449	0.635	22.85464	26	0.64116	22.59450	25	0.60123
GCST90199731	22	0.734165	0.93403	0.63339-1.3774	0.442322	1.08335	0.88321-1.32885	0.901079	0.99112	0.86103-1.14085	0.569289	1.10626	0.78557-1.55785	0.492854	1.11203	0.82530-1.49838	0.00779	0.75143	0.522	19.54531	21	0.55020	19.44217	20	0.49327
GCST90200923	26	0.949119	0.99171	0.77012-1.2771	0.583596	0.94648	0.77747-1.15222	0.902512	1.00797	0.88779-1.14441	0.234104	0.80427	0.56669-1.14147	0.321499	0.87599	0.67776-1.13221	0.00217	0.88540	0.824	18.70614	25	0.81099	18.68492	24	0.76858
GCST90199744	21	0.144418	0.64809	0.37076-1.1328	0.967454	0.99572	0.81021-1.22369	0.902665	0.98839	0.81970-1.19180	0.523942	1.13960	0.76784-1.69134	0.548655	1.12159	0.77579-1.62153	0.05158	0.13397	0.021	35.54527	20	0.01739	31.48427	19	0.03570
GCST90199933	29	0.786232	0.96553	0.75124-1.2410	0.384361	1.06666	0.92232-1.23359	0.90376	1.00646	0.90667-1.11724	0.458635	1.10968	0.84589-1.45574	0.300992	1.12802	0.90159-1.41130	0.00602	0.72330	0.369	30.26946	28	0.35045	30.12664	27	0.30849
GCST90199802	36	0.29892	0.90336	0.74791-1.0911	0.421054	1.06026	0.91941-1.22269	0.905383	1.00571	0.91561-1.10467	0.362309	0.88053	0.67206-1.15366	0.354114	1.07711	0.92243-1.25773	0.01791	0.20791	0.654	31.32498	35	0.64622	29.67696	34	0.67955
GCST90200551	16	0.207944	1.18121	0.92246-1.5125	0.670841	0.95572	0.77555-1.17774	0.906003	0.99163	0.86247-1.14013	0.352308	0.82013	0.54708-1.22946	0.426503	0.87668	0.63942-1.20199	-0.02632	0.11511	0.498	13.87271	15	0.53520	11.05014	14	0.68209
GCST90200754	17	0.31258	1.22472	0.83736-1.7913	0.500692	0.93588	0.77170-1.13498	0.90645	1.00841	0.87698-1.15954	0.443422	1.14532	0.81651-1.60655	0.722992	0.95343	0.73581-1.23542	-0.02474	0.29845	0.745	12.18534	16	0.73113	11.02520	15	0.75081
GCST90200762	17	0.989539	0.99725	0.66492-1.4957	0.966454	1.00519	0.78978-1.27935	0.906575	1.01090	0.84348-1.21155	0.996429	0.99898	0.64326-1.55140	0.685654	1.09099	0.72108-1.65068	0.00187	0.94190	0.28	18.81378	16	0.27844	18.80690	15	0.22262
GCST90200807	21	0.913436	0.98298	0.72425-1.3341	0.51545	0.94703	0.80375-1.11583	0.907895	1.00701	0.89468-1.13343	0.682855	0.94568	0.72623-1.23144	0.678209	0.95921	0.79017-1.16441	0.00322	0.86831	0.695	16.59528	20	0.67908	16.56703	19	0.61917
GCST90200779	29	0.477264	0.90715	0.69598-1.1824	0.862789	1.01460	0.86079-1.19589	0.908283	0.99307	0.88222-1.11784	0.563259	0.91128	0.66751-1.24407	0.526112	0.91959	0.71196-1.18779	0.01157	0.46090	0.669	24.72516	28	0.64275	24.16560	27	0.62112
GCST90200152	27	0.689111	0.94027	0.69781-1.2670	0.735417	0.97366	0.83403-1.13668	0.908563	0.99340	0.88722-1.11228	0.675329	0.94691	0.73571-1.21876	0.676596	0.96561	0.82073-1.13608	0.00923	0.69879	0.131	35.06669	26	0.11021	34.85307	25	0.09090
GCST90200888	20	0.699196	1.07356	0.75326-1.5301	0.845755	1.01899	0.84302-1.23170	0.909043	1.00896	0.86582-1.17577	0.871265	1.02926	0.72955-1.45211	0.868862	1.02926	0.73421-1.44289	-0.00850	0.70643	0.108	25.13454	19	0.15616	24.93169	18	0.12681
GCST90199828	25	0.491228	0.90694	0.68981-1.1924	0.804913	0.97659	0.80920-1.17860	0.910633	0.99264	0.87250-1.12932	0.910908	1.01936	0.73115-1.42116	0.915008	0.98570	0.75867-1.28066	0.01273	0.47084	0.554	22.68090	24	0.53869	22.14330	23	0.51162
GCST90200453	24	0.14789	0.81889	0.63071-1.0632	0.613102	0.95472	0.79777-1.14255	0.911467	0.99290	0.87578-1.12569	0.481109	0.88214	0.62588-1.24334	0.294967	0.85928	0.65114-1.13395	0.02701	0.11673	0.263	25.62073	23	0.31909	22.85125	22	0.41017
GCST90200468	18	0.282525	1.22375	0.85731-1.7468	0.294115	1.11920	0.90685-1.38127	0.911647	1.00987	0.84901-1.20122	0.421629	1.22063	0.75946-1.96184	0.388109	1.19446	0.80613-1.76987	-0.03144	0.24502	0.02	30.58417	17	0.02243	28.03226	16	0.03134
GCST90200218	23	0.793038	1.04989	0.73316-1.5034	0.985777	0.99831	0.82850-1.20291	0.911789	0.99202	0.86092-1.14309	0.251232	1.28545	0.84657-1.95183	0.269268	1.26054	0.84461-1.88129	-0.00755	0.73862	0.256	26.42537	22	0.23387	26.28228	21	0.19589
GCST90200766	15	0.09513	0.66018	0.42003-1.0376	0.867285	0.98102	0.78357-1.22822	0.911887	0.98928	0.81730-1.19744	0.709425	1.07837	0.73095-1.59092	0.950158	0.98825	0.68681-1.42201	0.05371	0.07959	0.163	19.04476	14	0.16325	14.89956	13	0.31367
GCST90200504	27	0.894618	1.00941	0.87996-1.1579	0.975269	0.99807	0.88347-1.12754	0.915496	1.00443	0.92575-1.08979	0.881245	0.98591	0.81995-1.18547	0.915773	0.99345	0.88064-1.12071	-0.00114	0.93060	0.651	23.50386	26	0.60431	23.49612	25	0.54862
GCST90199950	34	0.857957	1.02139	0.81160-1.2854	0.847405	0.98321	0.82745-1.16828	0.91614	0.99333	0.87696-1.12514	0.66421	0.92979	0.67130-1.28781	0.448231	0.89945	0.68619-1.17899	-0.00473	0.77802	0.044	47.73207	33	0.04677	47.61181	32	0.03733
GCST90200274	24	0.43052	0.93665	0.79838-1.0989	0.78505	0.98291	0.86841-1.11251	0.916355	1.00479	0.91906-1.09852	0.792195	0.96302	0.72999-1.27045	0.74978	0.97895	0.86032-1.11394	0.01366	0.31021	0.644	20.15983	23	0.63225	19.08086	22	0.64033
GCST90200364	19	0.195541	0.79614	0.57143-1.1092	0.102966	0.86437	0.72547-1.02988	0.917173	0.99216	0.85539-1.15081	0.939077	0.98343	0.64445-1.50070	0.0850493	0.85301	0.71894-1.01208	0.03071	0.16685	0.04	29.80536	18	0.03938	26.54805	17	0.06504
GCST90199914	28	0.112546	1.35903	0.94241-1.9598	0.772825	1.02566	0.86357-1.21817	0.917366	1.00881	0.85477-1.19061	0.48657	1.14118	0.79069-1.64703	0.195178	1.29897	0.88305-1.91080	-0.04129	0.08803	<0.001	77.89611	27	0.00000	69.49816	26	0.00001
GCST90200918	21	0.190874	0.77003	0.52785-1.1233	0.544565	1.05940	0.87902-1.27679	0.917503	1.00933	0.84672-1.20316	0.869918	1.03097	0.71901-1.47828	0.545656	1.09822	0.81462-1.48056	0.03894	0.13247	0.002	44.80677	20	0.00117	39.65029	19	0.00364
GCST90200771	17	0.307097	1.15776	0.88244-1.5190	0.996074	1.00050	0.81923-1.22188	0.919858	0.99247	0.85665-1.14983	0.642436	0.92873	0.68375-1.26149	0.92521	0.98774	0.76658-1.27271	-0.02358	0.20876	0.44	16.58020	16	0.41325	14.85499	15	0.46191
GCST90200874	31	0.178148	0.83351	0.64355-1.0796	0.511557	0.94546	0.79969-1.11781	0.920885	0.99297	0.86398-1.14123	0.428998	0.89308	0.67739-1.17745	0.392633	0.91711	0.75422-1.11517	0.02662	0.12978	0.006	51.79943	30	0.00800	47.79253	29	0.01544
GCST90200788	15	0.872549	0.98613	0.83415-1.1658	0.893414	1.00739	0.90456-1.12191	0.922601	0.99411	0.88243-1.11993	0.892006	0.98036	0.74001-1.29876	0.909467	1.00712	0.89311-1.13569	0.00220	0.89079	0.205	21.19396	14	0.09676	21.16204	13	0.06978
GCST90200286	24	0.642158	1.03398	0.89979-1.1882	0.870029	1.01188	0.87840-1.16564	0.922966	0.99543	0.90715-1.09230	0.159062	0.81094	0.61153-1.07536	0.151386	1.12807	0.96208-1.32270	-0.00876	0.47912	0.566	17.86924	23	0.76454	17.35087	22	0.74371
GCST90200970	20	0.509626	1.11163	0.81671-1.5130	0.400426	1.09663	0.88447-1.35968	0.923233	1.00721	0.87031-1.16564	0.534541	1.13649	0.76455-1.68936	0.477845	1.12685	0.81558-1.55692	-0.01397	0.48550	0.543	17.60157	19	0.54918	17.09441	18	0.51662
GCST90200510	17	0.885892	0.95626	0.52447-1.7435	0.956289	0.99407	0.80362-1.22965	0.923236	1.00971	0.82955-1.22899	0.899342	0.97649	0.67938-1.40355	0.901994	1.02195	0.72725-1.43608	0.00621	0.85296	0.047	26.78681	16	0.04391	26.72346	15	0.03107
GCST90199820	24	0.415725	0.87450	0.63701-1.2005	0.921145	0.99054	0.82069-1.19556	0.925323	1.00676	0.87444-1.15910	0.907433	0.97942	0.69242-1.38536	0.659008	0.93482	0.69566-1.25620	0.02071	0.34116	0.159	29.16662	23	0.17485	27.96341	22	0.17690
GCST90199912	21	0.0947784	1.26227	0.97365-1.6365	0.51808	1.05275	0.90078-1.23036	0.925618	1.00559	0.89453-1.13044	0.708628	1.05131	0.81165-1.36174	0.509042	1.05850	0.89684-1.24931	-0.03735	0.07338	0.299	24.01908	20	0.24156	20.20029	19	0.38262
GCST90200343	21	0.908539	1.02398	0.68716-1.5259	0.443784	1.07800	0.88948-1.30647	0.925721	0.99215	0.84062-1.17099	0.83233	0.96395	0.68918-1.34826	0.704039	1.04681	0.82950-1.32105	-0.00418	0.86565	0.073	29.49791	20	0.07841	29.45232	19	0.05920
GCST90200759	26	0.0822383	0.82882	0.67662-1.0153	0.701074	0.97027	0.83168-1.13194	0.927955	1.00518	0.89869-1.12429	0.452869	1.12394	0.83237-1.51764	0.264378	0.91304	0.78102-1.06737	0.03441	0.03979	0.213	29.16319	25	0.25715	24.36484	24	0.44090
GCST90200021	17	0.613432	0.94710	0.77042-1.1643	0.715208	0.97152	0.83188-1.13462	0.928367	1.00511	0.89947-1.12315	0.646223	1.06556	0.81665-1.39034	0.633598	0.96121	0.81945-1.12750	0.01046	0.51348	0.736	10.72877	16	0.82591	10.28081	15	0.80171
GCST90200040	34	0.300678	0.85366	0.63571-1.1463	0.143309	0.87104	0.72399-1.04795	0.928524	1.00675	0.86914-1.16614	0.281605	0.80648	0.54871-1.18534	0.207528	0.84199	0.64779-1.09441	0.02071	0.21624	0.007	55.56018	33	0.00830	52.92797	32	0.01141
GCST90200209	27	0.350326	0.85614	0.62177-1.1788	0.74223	1.02972	0.86483-1.22604	0.929491	0.99407	0.87141-1.13401	0.667142	0.93326	0.68367-1.27397	0.925446	0.98696	0.75165-1.29593	0.02082	0.32481	0.191	31.61306	26	0.20623	30.38688	25	0.21013
GCST90200672	30	0.447473	0.95581	0.85199-1.0723	0.731786	1.01833	0.91787-1.12978	0.930129	1.00328	0.93253-1.07939	0.554572	0.93012	0.73350-1.17944	0.801485	0.98736	0.89493-1.08933	0.01097	0.29346	0.645	25.97588	29	0.62678	24.82957	28	0.63710
GCST90199779	25	0.650925	1.06058	0.82477-1.3638	0.875493	1.01477	0.84470-1.21909	0.931927	0.99446	0.87551-1.12957	0.832546	0.96849	0.72208-1.29898	0.480493	1.09687	0.85180-1.41243	-0.01010	0.56439	0.237	27.64561	24	0.27527	27.24059	23	0.24587
GCST90200094	26	0.570546	1.02669	0.93854-1.1231	0.655862	1.02105	0.93165-1.11904	0.932604	1.00310	0.93369-1.07766	0.930623	1.01186	0.77808-1.31588	0.61527	1.02141	0.94140-1.10822	-0.00776	0.40721	0.733	20.95237	25	0.69526	20.24067	24	0.68301
GCST90199951	29	0.792155	0.96994	0.77470-1.2144	0.499741	1.04898	0.91297-1.20525	0.933079	1.00418	0.91105-1.10682	0.426324	1.13578	0.83376-1.54721	0.39935	1.12766	0.85641-1.48481	0.00546	0.73882	0.27	32.19824	28	0.26652	32.06348	27	0.22974
GCST90200709	35	0.818499	1.01323	0.90644-1.1326	0.773981	1.01261	0.92962-1.10300	0.933184	0.99659	0.92017-1.07936	0.789717	1.02764	0.84234-1.25372	0.679037	1.01633	0.94187-1.09669	-0.00472	0.67493	0.069	49.45694	34	0.04215	49.19004	33	0.03467
GCST90200729	24	0.473641	1.11529	0.83175-1.4955	0.657373	0.95651	0.78589-1.16418	0.93325	0.99415	0.86655-1.14054	0.409718	0.85469	0.59243-1.23305	0.966924	1.00687	0.73114-1.38657	-0.01578	0.39324	0.35	24.95778	23	0.35247	24.12612	22	0.34065
GCST90199903	21	0.754194	1.07459	0.68940-1.6750	0.943993	1.00734	0.82139-1.23539	0.934098	0.99417	0.86544-1.14204	0.929806	1.01588	0.71858-1.43619	0.759872	1.04964	0.77261-1.42599	-0.00876	0.72110	0.485	19.83934	20	0.46802	19.70319	19	0.41263
GCST90199821	21	0.495937	0.92094	0.72987-1.1620	0.598777	0.96178	0.83182-1.11204	0.934138	1.00449	0.90327-1.11705	0.621327	0.93775	0.72954-1.20539	0.70558	0.95672	0.76300-1.19963	0.01276	0.42081	0.657	16.88492	20	0.66043	16.20787	19	0.64337
GCST90200847	20	0.133021	1.35933	0.92736-1.9925	0.536786	0.93512	0.75583-1.15694	0.93423	0.99370	0.85529-1.15452	0.215944	0.75060	0.48376-1.16462	0.236859	0.78498	0.53228-1.15765	-0.03303	0.09845	0.445	19.37583	19	0.43298	16.33888	18	0.56891
GCST90201020	25	0.896876	0.99197	0.87922-1.1192	0.284045	1.05219	0.95867-1.15483	0.93472	0.99662	0.91900-1.08079	0.882213	1.01598	0.82555-1.25034	0.887707	1.00553	0.93214-1.08471	0.00166	0.91768	0.077	40.81257	24	0.01746	40.79321	23	0.01250
GCST90200895	34	0.421619	0.84266	0.55802-1.2725	0.409897	0.92890	0.77944-1.10702	0.935076	0.99391	0.85800-1.15134	0.904979	0.97998	0.70488-1.36245	0.853659	0.97233	0.72328-1.30712	0.01909	0.40667	0.009	56.84772	33	0.00609	55.61883	32	0.00596
GCST90200581	33	0.875485	1.00556	0.93868-1.0772	0.656324	1.01796	0.94121-1.10096	0.935571	1.00224	0.94923-1.05822	0.250995	1.12150	0.92536-1.35921	0.668466	1.01452	0.95032-1.08306	-0.00121	0.87902	0.878	23.54948	32	0.86026	23.52593	31	0.82940
GCST90200516	17	0.0324083	1.45054	1.06471-1.9762	0.6421	0.95224	0.77467-1.17051	0.936056	1.00660	0.85718-1.18206	0.246124	0.75755	0.48205-1.19050	0.405476	0.85253	0.59124-1.22930	-0.05339	0.02060	0.122	22.62325	16	0.12418	15.64130	15	0.40628
GCST90200391	22	0.378203	0.85948	0.61832-1.1947	0.92067	0.99031	0.81753-1.19959	0.936227	1.00560	0.87701-1.15305	0.42253	1.15528	0.81750-1.63262	0.405299	1.14973	0.83321-1.58648	0.02170	0.31654	0.462	20.93708	21	0.46279	19.88172	20	0.46535
GCST90200818	15	0.469354	0.84384	0.53993-1.3188	0.381406	1.09368	0.89497-1.33650	0.936233	0.99359	0.84878-1.16311	0.666458	1.07999	0.76672-1.52126	0.543021	1.10905	0.80099-1.53560	0.02300	0.45622	0.122	19.99694	14	0.13024	19.12905	13	0.11916
GCST90200547	28	0.309582	1.08633	0.92886-1.2705	0.748103	1.02015	0.90320-1.15224	0.936924	0.99622	0.90700-1.09421	0.582994	0.94083	0.75873-1.16664	0.747359	1.02098	0.90095-1.15701	-0.01900	0.19095	0.201	33.45881	27	0.18235	31.28895	26	0.21768
GCST90200489	24	0.263979	1.15124	0.90487-1.4647	0.541485	0.95232	0.81410-1.11401	0.937492	0.99554	0.89035-1.11316	0.375368	0.87560	0.65648-1.16787	0.23065	0.86787	0.69260-1.08748	-0.02347	0.19688	0.401	23.53259	23	0.43006	21.76156	22	0.47420
GCST90199684	18	0.296318	0.72839	0.40973-1.2949	0.978948	0.99669	0.77909-1.27506	0.937679	1.00983	0.79020-1.29050	0.74346	0.92576	0.58763-1.45844	0.876479	0.97030	0.66725-1.41100	0.04601	0.23779	0.001	36.97948	17	0.00339	33.80195	16	0.00578
GCST90200418	39	0.883972	0.98753	0.83539-1.1674	0.47039	0.95503	0.84286-1.08212	0.938415	0.99619	0.90420-1.09753	0.880751	0.98360	0.79366-1.21901	0.832387	0.98360	0.84484-1.14515	0.00184	0.90025	0.143	48.54595	38	0.11742	48.52506	37	0.09727
GCST90200294	29	0.77082	0.99273	0.94565-1.0422	0.98935	1.00026	0.96328-1.03866	0.938418	0.99829	0.95577-1.04270	0.69483	0.94747	0.72559-1.23721	0.955951	1.00096	0.96789-1.03515	0.00568	0.59672	0.182	47.74456	28	0.01141	47.24289	27	0.00932
GCST90199734	20	0.627143	1.03183	0.91125-1.1684	0.798103	1.01349	0.91458-1.12311	0.939745	1.00360	0.91423-1.10171	0.327497	1.14151	0.88183-1.47765	0.642038	1.02176	0.93447-1.11719	-0.00954	0.50831	0.103	30.16289	19	0.04976	29.41845	18	0.04350
GCST90200845	23	0.2038	0.81642	0.60295-1.1055	0.541081	1.06103	0.87745-1.28302	0.93988	1.00522	0.87806-1.15079	0.594584	1.12498	0.73372-1.72488	0.429972	1.15719	0.81067-1.65185	0.02776	0.14941	0.406	22.83262	22	0.41123	20.59317	21	0.48402
GCST90200329	23	0.545809	1.12925	0.76608-1.6646	0.733072	0.96481	0.78531-1.18535	0.941297	0.99444	0.85736-1.15345	0.819334	0.95610	0.65338-1.39906	0.844509	0.96176	0.65437-1.41354	-0.01485	0.49384	0.318	24.40870	22	0.32618	23.85780	21	0.30000
GCST90200790	25	0.883344	0.98323	0.78636-1.2294	0.969622	1.00309	0.85602-1.17541	0.941684	0.99561	0.88488-1.12019	0.762738	1.04537	0.78628-1.38983	0.734142	1.04033	0.83027-1.30354	0.00225	0.89746	0.261	28.45242	24	0.24142	28.43143	23	0.19991
GCST90200900	31	0.428374	0.87276	0.62613-1.2165	0.956652	0.99541	0.84315-1.17515	0.941808	0.99438	0.85467-1.15692	0.35497	1.20226	0.81867-1.76558	0.926032	1.01757	0.70670-1.46518	0.01959	0.39358	<0.001	82.85889	30	0.00000	80.76994	29	0.00000
GCST90200492	16	0.696064	0.95391	0.75646-1.2029	0.165881	0.89763	0.77045-1.04579	0.94256	0.99470	0.86092-1.14928	0.802543	0.96466	0.73119-1.27266	0.305318	0.92191	0.79337-1.07127	0.00794	0.65222	0.082	24.50798	15	0.05695	24.14226	14	0.04404
GCST90200610	21	0.484631	1.10341	0.84182-1.4463	0.637605	1.04277	0.87602-1.24126	0.942699	1.00457	0.88707-1.13764	0.891755	1.02154	0.75448-1.38312	0.727737	1.04551	0.81663-1.33854	-0.01354	0.45216	0.438	20.11783	20	0.45058	19.51272	19	0.42442
GCST90199889	28	0.104384	0.83949	0.68472-1.0292	0.468238	0.94804	0.82076-1.09507	0.943244	0.99652	0.90533-1.09690	0.948856	1.00897	0.76992-1.32224	0.4365	0.93935	0.80427-1.09712	0.02883	0.07284	0.585	24.20870	27	0.61872	20.71323	26	0.75661
GCST90200088	19	0.589733	0.96774	0.86093-1.0878	0.560695	0.96760	0.86598-1.08114	0.943743	0.99698	0.91670-1.08429	0.941554	1.00922	0.79229-1.28556	0.572604	0.97270	0.88506-1.06901	0.00825	0.48330	0.771	12.84013	18	0.80098	12.32650	17	0.77998
GCST90199673	44	0.736126	1.03051	0.86626-1.2259	0.0579506	0.86876	0.75117-1.00475	0.943997	0.99655	0.90483-1.09755	0.238964	0.83059	0.61245-1.12642	0.0979765	0.85237	0.70835-1.02568	-0.00462	0.65076	0.425	42.54869	43	0.49075	42.33910	42	0.45633
GCST90200202	20	0.546334	1.08411	0.83806-1.4024	0.817899	0.97958	0.82177-1.16768	0.944208	0.99561	0.88023-1.12612	0.783832	1.04652	0.75971-1.44159	0.851716	1.02923	0.76401-1.38650	-0.01244	0.46822	0.293	21.79035	19	0.29481	21.14523	18	0.27215
GCST90199668	22	0.98847	1.00117	0.85558-1.1715	0.909458	0.99345	0.88706-1.11260	0.944535	0.99687	0.91250-1.08904	0.845674	0.97908	0.79344-1.20816	0.863867	0.99021	0.88608-1.10657	-0.00114	0.94877	0.586	19.78116	21	0.53516	19.77693	20	0.47196
GCST90200302	27	0.277121	0.81040	0.55929-1.1743	0.334751	0.91198	0.75628-1.09974	0.946256	0.99422	0.84000-1.17675	0.767951	0.93713	0.61154-1.43607	0.485086	0.87219	0.59740-1.27338	0.02503	0.23754	0.001	53.12783	26	0.00131	50.18786	25	0.00202
GCST90201006	16	0.0771631	0.62534	0.38605-1.0130	0.278024	0.87482	0.68703-1.11394	0.946921	1.00618	0.83925-1.20632	0.337299	0.78338	0.48341-1.26949	0.371762	0.82392	0.54555-1.24435	0.05320	0.05877	0.273	18.04460	15	0.26033	13.81159	14	0.46384
GCST90199952	26	0.1761	0.81227	0.60636-1.0881	0.703521	1.03636	0.86226-1.24561	0.948265	1.00434	0.88122-1.14467	0.800382	1.04447	0.74812-1.45821	0.951765	1.00914	0.75367-1.35120	0.02705	0.12655	0.36	26.08586	25	0.40303	23.58045	24	0.48579
GCST90199887	20	0.653229	0.97279	0.86421-1.0950	0.833091	0.98886	0.89102-1.09745	0.948352	0.99701	0.91052-1.09171	0.774434	1.04862	0.76138-1.44422	0.899226	0.99333	0.89687-1.10017	0.00937	0.52453	0.507	20.41059	19	0.37026	19.94390	18	0.33599
GCST90200358	28	0.603577	0.93414	0.72460-1.2043	0.360496	0.93486	0.80918-1.08006	0.948606	0.99551	0.86822-1.14146	0.55324	0.92921	0.73118-1.18088	0.36579	0.93618	0.81347-1.07741	0.01079	0.56315	0.001	57.04448	27	0.00063	56.30172	26	0.00052
GCST90200189	20	0.28827	1.04644	0.96472-1.1351	0.287759	1.03915	0.96812-1.11538	0.948814	0.99772	0.93047-1.06982	0.940791	1.00828	0.81343-1.24980	0.296069	1.03931	0.96872-1.11505	-0.02237	0.06986	0.253	26.49636	19	0.11694	21.96355	18	0.23361
GCST90200971	24	0.943552	1.01189	0.73231-1.3982	0.532547	0.93784	0.76664-1.14726	0.948839	0.99542	0.86521-1.14523	0.715269	0.93853	0.67024-1.31421	0.696039	0.94230	0.70197-1.26492	-0.00206	0.91313	0.631	19.60945	23	0.66534	19.59728	22	0.60821
GCST90200419	26	0.864307	0.98019	0.78112-1.2300	0.961707	1.00419	0.84649-1.19128	0.949074	0.99643	0.89288-1.11200	0.651871	0.93070	0.68382-1.26671	0.986658	0.99837	0.82661-1.20584	0.00276	0.87183	0.427	25.78425	25	0.41918	25.75571	24	0.36568
GCST90199647	25	0.893643	0.97983	0.72925-1.3165	0.314204	0.90775	0.75181-1.09604	0.949232	1.00429	0.88024-1.14583	0.213642	0.78594	0.54311-1.13733	0.209227	0.81798	0.60283-1.10990	0.00350	0.85579	0.362	26.06843	24	0.34970	26.03020	23	0.29944
GCST90199978	23	0.132509	1.39891	0.91878-2.1299	0.958044	0.99482	0.81982-1.20718	0.949276	0.99364	0.81623-1.20960	0.906659	0.98184	0.72528-1.32916	0.96664	1.00555	0.77814-1.29942	-0.04517	0.08919	<0.001	46.67898	22	0.00162	40.54666	21	0.00638
GCST90200200	14	0.457038	0.80859	0.47033-1.3901	0.851697	0.97677	0.76343-1.24973	0.951298	0.99378	0.81343-1.21412	0.555811	0.86680	0.54535-1.37771	0.908804	1.02479	0.67949-1.54557	0.02455	0.43672	0.152	17.86032	13	0.16290	16.94620	12	0.15163
GCST90199637	20	0.817765	1.04770	0.70890-1.5484	0.914326	1.01100	0.82826-1.23406	0.95147	1.00461	0.86631-1.16499	0.558958	1.10419	0.79655-1.53065	0.730931	1.05604	0.77749-1.43438	-0.00500	0.82164	0.447	19.25456	19	0.44062	19.19874	18	0.37968
GCST90200906	30	0.134295	1.16263	0.95998-1.4081	0.907887	0.99094	0.84929-1.15621	0.951537	1.00313	0.90700-1.10945	0.194081	1.18059	0.92427-1.50801	0.9603	0.99530	0.82819-1.19614	-0.02581	0.09050	0.33	31.51992	29	0.34134	28.40190	28	0.44331
GCST90200213	23	0.0894147	0.82876	0.67398-1.0191	0.986653	1.00129	0.86089-1.16459	0.951539	0.99663	0.89370-1.11140	0.902233	1.01638	0.78656-1.31336	0.786274	0.97196	0.79333-1.19082	0.03505	0.05291	0.436	22.38159	22	0.43732	18.17333	21	0.63801
GCST90199996	27	0.416109	0.88115	0.65284-1.1893	0.891094	1.01048	0.87034-1.17320	0.95179	1.00475	0.86167-1.17159	0.797172	1.03541	0.79623-1.34645	0.776763	1.02278	0.87670-1.19321	0.02046	0.32742	<0.001	58.97721	26	0.00023	56.71367	25	0.00029
GCST90200656	27	0.79015	1.03910	0.78575-1.3741	0.740399	1.02817	0.87236-1.21181	0.95204	1.00443	0.86958-1.16020	0.620285	1.07046	0.82033-1.39686	0.512462	1.05432	0.90194-1.23245	-0.00541	0.78205	<0.001	52.15335	26	0.00172	51.99072	25	0.00120
GCST90199833	25	0.592692	1.05164	0.87672-1.2615	0.775275	0.98256	0.87073-1.10874	0.953277	0.99731	0.91141-1.09131	0.542543	0.93744	0.76372-1.15068	0.773082	0.98217	0.87033-1.10839	-0.01024	0.51557	0.487	24.40705	24	0.43853	23.95288	23	0.40642
GCST90200732	22	0.0931421	0.87372	0.75198-1.0152	0.674752	0.97532	0.86785-1.09609	0.953727	0.99677	0.89350-1.11196	0.784588	1.03289	0.82143-1.29878	0.601728	0.96751	0.85624-1.09323	0.03477	0.03224	0.011	40.50430	21	0.00645	32.02256	20	0.04306
GCST90200119	22	0.314131	0.86300	0.65245-1.1415	0.731956	1.02558	0.88755-1.18508	0.954771	0.99670	0.88913-1.11729	0.846089	0.97390	0.74808-1.26788	0.817118	1.02826	0.81433-1.29839	0.02473	0.28242	0.136	28.15776	21	0.13573	26.53853	20	0.14875
GCST90200582	22	0.149127	0.76628	0.54120-1.0850	0.555477	0.94127	0.76970-1.15107	0.954849	0.99568	0.85713-1.15663	0.46487	0.87786	0.62297-1.23703	0.412722	0.86837	0.62365-1.20910	0.03660	0.12038	0.15	27.76080	21	0.14707	24.53228	20	0.21991
GCST90200448	16	0.185146	0.87980	0.73480-1.0534	0.376694	0.92567	0.77999-1.09857	0.955312	1.00351	0.88786-1.13422	0.949202	1.01197	0.70610-1.45032	0.376072	0.91804	0.76394-1.10321	0.02662	0.08618	0.181	18.97790	15	0.21474	15.26352	14	0.36038
GCST90200142	33	0.377434	0.88147	0.66878-1.1618	0.636214	0.96265	0.82217-1.12713	0.955371	0.99630	0.87511-1.13428	0.778806	1.03768	0.80338-1.34030	0.724722	0.97274	0.83519-1.13295	0.01958	0.33240	0.008	55.49276	32	0.00615	53.80971	31	0.00674
GCST90200525	14	0.285632	0.83756	0.61376-1.1430	0.882128	0.98492	0.80571-1.20399	0.955947	1.00422	0.86489-1.16599	0.617774	1.08564	0.79225-1.48767	0.851827	0.97150	0.72157-1.30800	0.03394	0.21906	0.399	13.53269	13	0.40756	11.85083	12	0.45773
GCST90199806	18	0.250473	1.06862	0.95818-1.1918	0.966888	0.99794	0.90533-1.10002	0.956403	0.99794	0.92673-1.07461	0.0917108	0.82909	0.67507-1.01826	0.624435	1.02446	0.93161-1.12657	-0.01898	0.11357	0.749	11.61960	17	0.82260	8.81734	16	0.92074
GCST90200266	23	0.552429	1.04723	0.90154-1.2165	0.0987037	1.11447	0.97993-1.26748	0.95642	1.00258	0.91400-1.09975	0.493827	1.08294	0.86523-1.35542	0.184497	1.10408	0.95826-1.27209	-0.00883	0.47365	0.295	24.51235	22	0.32096	23.90623	21	0.29762
GCST90200238	24	0.703595	1.01357	0.94642-1.0855	0.790222	1.00944	0.94194-1.08177	0.957091	0.99848	0.94471-1.05531	0.49605	0.93678	0.77853-1.12720	0.858288	1.00538	0.94848-1.06570	-0.00671	0.46643	0.482	24.11735	23	0.39733	23.52981	22	0.37235
GCST90199621	25	0.25882	0.91310	0.78285-1.0650	0.896427	0.99181	0.87637-1.12246	0.960063	0.99765	0.90989-1.09387	0.774997	1.03401	0.82422-1.29720	0.842417	0.98804	0.87863-1.11108	0.01810	0.17263	0.911	16.13593	24	0.88311	14.15468	23	0.92236
GCST90200199	20	0.223336	0.92410	0.81741-1.0447	0.441037	0.95230	0.84097-1.07838	0.96012	0.99775	0.91358-1.08968	0.562287	1.07132	0.85209-1.34697	0.505614	0.96270	0.86257-1.07444	0.01900	0.09513	0.534	18.15613	19	0.51203	15.05334	18	0.65830
GCST90199884	24	0.630595	1.05058	0.86160-1.2810	0.318926	1.08700	0.92253-1.28078	0.961693	1.00272	0.89751-1.12027	0.637148	1.06384	0.82543-1.37111	0.361348	1.08451	0.91429-1.28641	-0.00727	0.58397	0.585	21.28225	23	0.56386	20.97336	22	0.52239
GCST90200225	20	0.726853	1.05813	0.77445-1.4457	0.651364	1.04489	0.86368-1.26411	0.96191	0.99603	0.84595-1.17274	0.451582	1.11682	0.84260-1.48027	0.49658	1.07570	0.87515-1.32222	-0.01297	0.65849	0.075	28.91056	19	0.06741	28.58975	18	0.05363
GCST90200982	19	0.648894	0.91300	0.62131-1.3416	0.387066	1.10073	0.88559-1.36813	0.963388	0.99622	0.84762-1.17088	0.61899	1.11141	0.73821-1.67329	0.444713	1.16431	0.79497-1.70525	0.01154	0.62920	0.223	22.04822	18	0.22985	21.73903	17	0.19496
GCST90200432	31	0.968923	1.00631	0.73518-1.3775	0.917146	1.00817	0.86494-1.17511	0.964004	1.00295	0.88252-1.13981	0.711338	0.94161	0.68673-1.29108	0.898256	0.98426	0.77333-1.25272	-0.00042	0.98183	0.014	47.99429	30	0.01985	47.99342	29	0.01472
GCST90200785	19	0.399415	0.93592	0.80542-1.0876	0.824015	0.98460	0.85871-1.12894	0.965774	1.00220	0.90630-1.10826	0.770771	1.03385	0.82922-1.28897	0.814992	0.98399	0.86123-1.12424	0.01657	0.24550	0.681	16.37204	18	0.56660	14.92505	17	0.60088
GCST90200313	34	0.747903	0.94788	0.68580-1.3101	0.873705	0.98607	0.82950-1.17221	0.966669	0.99726	0.87697-1.13406	0.215602	0.79863	0.56331-1.13226	0.184789	0.81248	0.60160-1.09729	0.00649	0.73904	0.146	41.93777	33	0.13686	41.79030	32	0.11528
GCST90201018	21	0.150724	1.14332	0.95946-1.3624	0.311601	1.05630	0.94998-1.17452	0.966955	1.00240	0.89475-1.12301	0.887042	0.97398	0.68006-1.39492	0.331477	1.05634	0.94826-1.17673	-0.03145	0.07864	0.117	33.39406	20	0.03053	28.25655	19	0.07861
GCST90200664	35	0.159918	1.10894	0.96314-1.2768	0.942889	1.00446	0.88925-1.13460	0.96762	0.99828	0.91865-1.08482	0.899144	0.98631	0.79818-1.21877	0.696576	1.02941	0.89093-1.18942	-0.02034	0.07941	0.852	25.33612	34	0.85842	22.06001	33	0.92625
GCST90200901	16	0.204475	0.73254	0.46321-1.1585	0.607515	1.06401	0.83970-1.34823	0.968463	1.00397	0.82491-1.22190	0.291555	1.28002	0.82222-1.99274	0.270271	1.28691	0.83556-1.98206	0.03471	0.16111	0.137	21.24742	15	0.12911	18.37390	14	0.19028
GCST90199746	19	0.900994	0.97884	0.70230-1.3643	0.56421	1.06343	0.86282-1.31069	0.968735	1.00289	0.86801-1.15874	0.36657	0.84819	0.59867-1.20172	0.413897	1.11410	0.86490-1.43509	0.00302	0.87540	0.924	10.14676	18	0.92701	10.12142	17	0.89844
GCST90200425	25	0.314241	1.14184	0.88689-1.4701	0.966252	0.99689	0.86297-1.15159	0.969403	1.00224	0.89381-1.12383	0.275	0.85737	0.65450-1.12312	0.807633	1.02220	0.85825-1.21748	-0.02247	0.26890	0.062	35.20129	24	0.06547	33.34058	23	0.07531
GCST90200980	22	0.937857	1.02026	0.62004-1.6788	0.307385	1.11373	0.90563-1.36965	0.970821	0.99682	0.84047-1.18226	0.292289	1.24063	0.83895-1.83461	0.236602	1.26052	0.86855-1.82938	-0.00277	0.92315	0.062	32.84015	21	0.04802	32.82449	20	0.03527
GCST90199898	26	0.878547	0.98004	0.75881-1.2658	0.574099	1.05111	0.88340-1.25066	0.971011	0.99746	0.86942-1.14435	0.998897	1.00024	0.71610-1.39711	0.750596	1.04674	0.79222-1.38303	0.00283	0.87322	0.066	36.52521	25	0.06400	36.48566	24	0.04921
GCST90200688	26	0.511132	0.93504	0.76756-1.1391	0.772565	0.97841	0.84378-1.13452	0.971231	1.00228	0.88545-1.13453	0.142467	0.78965	0.58168-1.07196	0.712139	0.97189	0.83671-1.12890	0.01329	0.38304	0.025	40.57355	25	0.02544	39.28120	24	0.02551
GCST90200735	29	0.466947	1.10481	0.84782-1.4397	0.578309	0.95786	0.82295-1.11489	0.97138	1.00236	0.88104-1.14039	0.788935	1.03843	0.78998-1.36501	0.487985	0.93182	0.76525-1.13464	-0.01450	0.41580	0.011	47.84570	28	0.01113	46.66524	27	0.01078
GCST90200022	29	0.333443	0.92194	0.78425-1.0838	0.552769	0.96121	0.84350-1.09534	0.972029	1.00159	0.91668-1.09435	0.207891	0.86770	0.69932-1.07664	0.690398	0.97186	0.84572-1.11681	0.01339	0.24205	0.43	28.63026	28	0.43146	27.18953	27	0.45361
GCST90200193	20	0.946508	1.00555	0.85730-1.1794	0.947049	0.99601	0.88521-1.12068	0.972443	1.00189	0.90018-1.11509	0.628915	0.94136	0.73966-1.19806	0.940828	0.99528	0.87976-1.12596	-0.00087	0.95131	0.248	24.49491	19	0.17785	24.48969	18	0.13963
GCST90200542	31	0.91823	0.98406	0.72607-1.3337	0.423409	1.07192	0.90429-1.27063	0.972568	1.00235	0.87706-1.14552	0.585847	1.09703	0.78905-1.52521	0.610215	1.07859	0.80882-1.43833	0.00237	0.89541	0.111	40.22718	30	0.10054	40.20280	29	0.08068
GCST90200960	31	0.0845606	1.20008	0.98239-1.4660	0.654124	0.96780	0.83869-1.11678	0.973441	1.00193	0.89456-1.12218	0.434195	0.89614	0.68331-1.17526	0.956033	0.99292	0.77302-1.27538	-0.02944	0.04507	0.17	38.24716	30	0.14351	33.22174	29	0.26889
GCST90200872	24	0.727783	0.95058	0.71717-1.2600	0.746674	1.03116	0.85600-1.24216	0.973562	0.99753	0.86196-1.15442	0.620922	1.09331	0.77137-1.54962	0.531849	1.07724	0.85613-1.35546	0.00746	0.69668	0.04	36.56949	23	0.03605	36.31202	22	0.02811
GCST90200348	20	0.678755	1.06588	0.79196-1.4346	0.225679	0.88719	0.73100-1.07675	0.97402	1.00231	0.87216-1.15189	0.346621	0.83640	0.58191-1.20221	0.350579	0.85136	0.61233-1.18370	-0.00830	0.64963	0.291	21.80890	19	0.29387	21.55334	18	0.25242
GCST90200055	24	0.262492	0.85583	0.65638-1.1159	0.844967	1.01610	0.86581-1.19246	0.97648	0.99799	0.87322-1.14060	0.575401	0.93517	0.74214-1.17842	0.881083	1.01379	0.84893-1.21067	0.02280	0.20467	0.061	34.67185	23	0.05605	32.17322	22	0.07449
GCST90199918	22	0.20319	0.89118	0.75063-1.0581	0.547243	0.96052	0.84244-1.09515	0.976649	0.99819	0.88392-1.12722	0.912398	1.01429	0.79012-1.30205	0.614491	0.97125	0.86848-1.08618	0.02930	0.09435	0.006	43.59070	21	0.00264	37.76632	20	0.00946
GCST90200910	32	0.194656	0.78438	0.54789-1.1230	0.14924	0.87877	0.73723-1.04749	0.976682	0.99759	0.84861-1.17273	0.33547	0.76673	0.45034-1.30540	0.0714219	0.70933	0.49459-1.01731	0.03385	0.15340	<0.001	87.86038	31	0.00000	81.99644	30	0.00000
GCST90200601	38	0.828167	1.01866	0.86305-1.2023	0.472626	0.95113	0.82956-1.09050	0.977307	0.99865	0.91008-1.09585	0.668035	0.94249	0.72052-1.23284	0.640399	0.93412	0.70348-1.24039	-0.00293	0.77866	0.946	23.33754	37	0.96085	23.25734	36	0.95018
GCST90200195	36	0.971646	0.99614	0.80587-1.2313	0.309918	0.93351	0.81741-1.06610	0.977378	0.99854	0.90255-1.10473	0.867486	1.01942	0.81457-1.27580	0.228695	0.92548	0.81763-1.04755	0.00041	0.97983	0.004	62.13365	35	0.00317	62.13247	34	0.00226
GCST90199648	31	0.521704	1.04918	0.90748-1.2130	0.257118	1.07742	0.94705-1.22572	0.977804	1.00124	0.91775-1.09232	0.923474	0.98801	0.77398-1.26122	0.341031	1.07008	0.93288-1.22746	-0.00911	0.43437	0.447	30.18865	30	0.45602	29.54832	29	0.43680
GCST90200580	24	0.35694	1.17995	0.83594-1.6655	0.338857	1.09128	0.91242-1.30521	0.978931	1.00175	0.87978-1.14063	0.443091	1.15112	0.80839-1.63917	0.240681	1.15592	0.91311-1.46331	-0.01988	0.32580	0.852	16.16689	23	0.84803	15.15677	22	0.85542
GCST90200897	15	0.263764	0.82371	0.59490-1.1405	0.376177	0.90566	0.72720-1.12792	0.979025	0.99798	0.85835-1.16033	0.400221	0.86711	0.62832-1.19665	0.215396	0.83856	0.64274-1.09404	0.03659	0.21479	0.541	12.76696	14	0.54495	11.06605	13	0.60528
GCST90200969	24	0.725414	0.95243	0.72816-1.2458	0.693601	1.03932	0.85789-1.25911	0.979399	0.99826	0.87468-1.13931	0.889067	0.97204	0.65540-1.44165	0.698202	1.04818	0.82876-1.32568	0.00601	0.69555	0.274	26.49899	23	0.27788	26.31097	22	0.23857
GCST90199659	18	0.851188	1.04581	0.65989-1.6574	0.699541	0.95673	0.76424-1.19770	0.979409	0.99782	0.84523-1.17795	0.193812	0.76040	0.51133-1.13079	0.385474	0.84140	0.57542-1.23032	-0.00541	0.83223	0.28	19.77604	17	0.28584	19.71890	16	0.23315
GCST90200276	19	0.818943	0.96469	0.71249-1.3062	0.855949	0.98247	0.81165-1.18923	0.979911	1.00195	0.86073-1.16635	0.436371	0.86910	0.61524-1.22769	0.868419	0.97868	0.76119-1.25831	0.00644	0.77844	0.062	27.61700	18	0.06813	27.48489	17	0.05133
GCST90200958	20	0.550829	0.91573	0.68945-1.2163	0.720529	1.02749	0.88562-1.19209	0.981475	1.00125	0.90107-1.11256	0.507141	1.08642	0.85435-1.38154	0.513145	1.07865	0.86333-1.34768	0.01672	0.51407	0.406	20.07230	19	0.39024	19.59005	18	0.35637
GCST90199797	21	0.740982	0.92568	0.58951-1.4536	0.577905	1.06377	0.85561-1.32257	0.982446	1.00208	0.83300-1.20548	0.736078	1.06244	0.75068-1.50369	0.689766	1.06721	0.77899-1.46207	0.00929	0.70870	0.04	31.02816	20	0.05482	30.79503	19	0.04251
GCST90200666	22	0.204414	1.25526	0.89377-1.7630	0.671797	1.04391	0.85571-1.27351	0.982456	1.00163	0.86608-1.15841	0.288293	0.80368	0.54240-1.19081	0.604701	1.09538	0.77984-1.53860	-0.02715	0.16714	0.375	22.41861	21	0.37574	20.32961	20	0.43749
GCST90200191	23	0.627372	1.05839	0.84449-1.3265	0.932027	0.99268	0.83855-1.17514	0.982742	0.99873	0.89015-1.12056	0.340148	0.85986	0.63477-1.16477	0.637158	1.06877	0.81380-1.40364	-0.00988	0.56238	0.445	22.35766	22	0.43872	21.99475	21	0.39981
GCST90200617	17	0.817735	1.02493	0.83432-1.2591	0.927503	0.99235	0.84106-1.17085	0.982905	0.99876	0.89152-1.11890	0.566377	1.07115	0.85098-1.34829	0.817739	1.01995	0.86457-1.20326	-0.00604	0.77168	0.59	14.45518	16	0.56484	14.36787	15	0.49783
GCST90200829	19	0.462983	1.12807	0.82363-1.5450	0.984454	0.99833	0.84362-1.18140	0.985186	1.00130	0.87297-1.14850	0.22594	0.81131	0.58509-1.12498	0.366045	1.09560	0.90331-1.32883	-0.02159	0.41962	0.175	22.89110	18	0.19481	22.00549	17	0.18451
GCST90200382	18	0.249094	1.25601	0.86452-1.8248	0.911357	0.98698	0.78354-1.24322	0.98772	1.00140	0.83774-1.19704	0.966743	1.00810	0.69373-1.46494	0.966226	1.00810	0.69771-1.45657	-0.03068	0.19765	0.226	21.00760	17	0.22595	18.87609	16	0.27514
GCST90199891	22	0.160571	1.16105	0.94979-1.4193	0.986209	0.99859	0.85063-1.17228	0.987865	1.00085	0.89714-1.11655	0.262345	0.80573	0.55790-1.16365	0.0217661	1.22760	1.04383-1.44372	-0.02504	0.10493	0.233	23.13104	21	0.33703	20.21523	20	0.44454
GCST90200008	32	0.919344	0.98439	0.72774-1.3315	0.880353	0.98714	0.83405-1.16834	0.989544	0.99920	0.88584-1.12706	0.888915	1.02573	0.72022-1.46084	0.744456	0.95054	0.70255-1.28606	0.00174	0.91630	0.351	33.31667	31	0.35514	33.30420	30	0.30949
GCST90200464	34	0.80236	0.96981	0.76435-1.2305	0.949727	0.99537	0.86155-1.14997	0.989733	1.00067	0.90419-1.10743	0.274007	1.18496	0.87870-1.59798	0.704893	0.94970	0.72879-1.23758	0.00459	0.77749	0.729	28.06897	33	0.71120	27.98775	32	0.66997
GCST90200123	42	0.266844	1.14897	0.90227-1.4631	0.0473502	1.13784	1.00151-1.29273	0.991098	0.99932	0.88656-1.12642	0.799395	1.03104	0.81576-1.30312	0.25711	1.08870	0.94181-1.25849	-0.02400	0.20133	<0.001	96.96452	41	0.00000	93.03867	40	0.00000
GCST90199816	23	0.745287	1.05436	0.76931-1.4450	0.667449	1.03834	0.87460-1.23273	0.991401	1.00083	0.86002-1.16471	0.893745	0.98019	0.73323-1.31031	0.630007	1.05775	0.84443-1.32496	-0.00759	0.71373	0.033	35.42043	22	0.03500	35.18873	21	0.02692
GCST90199849	36	0.526585	1.06990	0.86987-1.3159	0.626979	1.03424	0.90294-1.18462	0.992512	1.00044	0.91353-1.09561	0.736659	0.96367	0.77806-1.19358	0.857518	1.01470	0.86627-1.18857	-0.00994	0.48405	0.733	29.99059	35	0.70856	29.48998	34	0.68839
GCST90200324	27	0.536138	0.96017	0.84568-1.0902	0.787162	0.98345	0.87124-1.11011	0.992772	0.99963	0.92198-1.08381	0.557235	1.06237	0.87028-1.29686	0.849265	0.98905	0.88386-1.10676	0.00925	0.42779	0.909	17.93629	26	0.87808	17.28650	25	0.87114
GCST90200371	27	0.0620247	0.70047	0.49008-1.0012	0.367073	0.92196	0.77274-1.10000	0.992907	0.99938	0.87149-1.14604	0.995016	1.00103	0.72674-1.37885	0.334361	0.88849	0.70199-1.12453	0.03856	0.04686	0.185	32.49140	26	0.17737	27.65500	25	0.32398
GCST90199954	27	0.875084	1.00860	0.90743-1.1211	0.648054	0.97674	0.88288-1.08059	0.993233	0.99968	0.92787-1.07704	0.716287	1.04635	0.82170-1.33240	0.915089	0.99515	0.91086-1.08724	-0.00286	0.81467	0.327	29.88342	26	0.27247	29.81649	25	0.23123
GCST90200100	24	0.951152	1.00558	0.84332-1.1991	0.701123	0.96785	0.81907-1.14365	0.993843	1.00043	0.89730-1.11542	0.158599	0.81930	0.62663-1.07120	0.645304	0.96018	0.80947-1.13895	-0.00121	0.94265	0.789	17.60931	23	0.77832	17.60402	22	0.72919
GCST90200388	26	0.512496	0.89731	0.65195-1.2350	0.386224	1.08890	0.89809-1.32026	0.994947	0.99958	0.87815-1.13780	0.427438	1.16904	0.79989-1.70853	0.512116	1.15377	0.75691-1.75872	0.01400	0.47509	0.463	24.91510	25	0.46714	24.38024	24	0.44003
GCST90199772	40	0.0193161	1.47020	1.07920-2.0029	0.439949	1.05610	0.91948-1.21303	0.995607	1.00037	0.87539-1.14320	0.747527	1.04516	0.80021-1.36509	0.105774	1.14938	0.97475-1.35528	-0.04688	0.01124	<0.001	93.22391	39	0.00000	78.54495	38	0.00012
GCST90200333	26	0.511264	1.10861	0.81876-1.5011	0.467603	1.06944	0.89225-1.28181	0.996114	0.99970	0.88531-1.12887	0.618973	1.08269	0.79470-1.47506	0.451696	1.12052	0.83701-1.50006	-0.01340	0.47246	0.638	22.19038	25	0.62473	21.65748	24	0.59970
GCST90199930	23	0.657648	1.08059	0.77073-1.5150	0.66809	0.95840	0.78922-1.16385	0.996824	0.99972	0.86896-1.15014	0.537311	0.88934	0.61627-1.28340	0.524615	0.89735	0.64620-1.24611	-0.00985	0.62514	0.617	19.63100	22	0.60611	19.38512	21	0.56045
GCST90200236	29	0.636558	1.03173	0.90769-1.1727	0.384408	1.05278	0.93756-1.18216	0.997585	0.99988	0.92359-1.08247	0.330795	1.11550	0.89838-1.38510	0.4949	1.04164	0.92791-1.16932	-0.00610	0.54613	0.792	22.11958	28	0.77573	21.74592	27	0.75017
GCST90200197	17	0.292005	1.23506	0.84555-1.8040	0.865241	0.98181	0.79423-1.21369	0.998185	1.00018	0.85399-1.17140	0.905777	0.97756	0.67525-1.41520	0.927708	0.98427	0.70257-1.37893	-0.02722	0.24891	0.458	16.12926	16	0.44398	14.69030	15	0.47395

## Sheet: S5.2
The resluts of forward univariable MR analysis between 1400 phenotypes of metabolites and the risk of AAA in UK Biobank database.
id	nsnp	MR-Egger			Weighted median			Inverse variance weighted			Simple mode			Weighted mode			MR-Egger intercept		MR-PRESSO global	MR-IVW			MR-Egeer
		p_value	OR	95% OR	p_value	OR	95% OR	p_value	OR	95% OR	p_value	OR	95% OR	p_value	OR	95% OR	egger intercept	p_value	p_value	Q	Q_df	Q_pval	Q	Q_df	Q_pval
GCST90199621	26	0.76	0.87948	0.39106-1.9779	0.112	0.71805	0.47705-1.08079	0.001	0.58413	0.42830-0.79664	0.368	0.68914	0.31223-1.52103	0.333	0.68914	0.33063-1.43641	-0.06024	0.29853	0.343	21.5335	19	0.30809	20.2445	18	0.31922
GCST90199622	15	0.163	0.59535	0.29405-1.2054	0.084	0.64551	0.39266-1.06119	0.002	0.59833	0.43074-0.83113	0.485	0.72349	0.29559-1.77081	0.263	0.66838	0.33540-1.33196	0.00066	0.98761	0.657	22.1937	25	0.62454	22.1934	24	0.56772
GCST90199623	24	0.295	1.39594	0.75851-2.5690	0.04	1.42625	1.01558-2.00299	0.003	1.51758	1.15782-1.98913	0.272	1.43507	0.76495-2.69223	0.057	1.4209	1.00778-2.00338	0.01463	0.76617	0.228	28.3254	23	0.20373	28.2091	22	0.16885
GCST90199624	19	0.076	0.46232	0.20730-1.0311	0.015	0.5171	0.30464-0.87774	0.003	0.55982	0.38285-0.81859	0.306	0.61031	0.24307-1.53242	0.287	0.61031	0.25220-1.47693	0.0217	0.60195	0.661	16.288	19	0.63798	16.0061	18	0.59212
GCST90199625	26	0.353	1.65092	0.59281-4.5977	0.037	1.89958	1.03869-3.47400	0.004	1.93681	1.23140-3.04633	0.205	2.21256	0.68054-7.19347	0.273	2.0005	0.60349-6.63141	0.01946	0.73621	0.371	17.7952	16	0.33603	17.6565	15	0.28115
GCST90199626	25	0.495	0.73543	0.31027-1.7432	0.022	0.52929	0.30694-0.91269	0.004	0.55002	0.36607-0.82641	0.197	0.51149	0.19166-1.36498	0.183	0.50633	0.19326-1.32654	-0.04366	0.46298	0.371	19.8147	18	0.34335	19.1786	17	0.31838
GCST90199627	22	0.564	1.11416	0.77531-1.6011	0.122	1.25342	0.94143-1.66880	0.004	1.39345	1.11370-1.74348	0.549	1.26847	0.58942-2.72985	0.154	1.25515	0.92675-1.69993	0.04504	0.1371	0.777	19.7343	25	0.76062	17.3685	24	0.83253
GCST90199628	28	0.142	1.68244	0.85791-3.2994	0.015	1.66393	1.10213-2.51211	0.005	1.51982	1.13804-2.02967	0.083	1.8355	0.94720-3.55688	0.105	1.64492	0.91990-2.94137	-0.01405	0.74585	0.866	19.2478	27	0.86079	19.1405	26	0.83044
GCST90199629	28	0.326	0.6413	0.27051-1.5204	0.252	0.7276	0.42204-1.25439	0.006	0.60227	0.41936-0.86495	0.058	0.30178	0.09445-0.96424	0.049	0.28238	0.08682-0.91845	-0.00758	0.87651	0.43	18.6053	19	0.48241	18.5796	18	0.41813
GCST90199630	26	0.171	1.57747	0.83827-2.9685	0.047	1.58624	1.00685-2.49903	0.007	1.58109	1.13084-2.21062	0.322	1.5681	0.65599-3.74845	0.222	1.65542	0.75289-3.63985	0.00035	0.99337	0.984	12.5909	24	0.9724	12.5908	23	0.96031
GCST90199631	15	0.017	0.42365	0.22047-0.8141	0.013	0.59896	0.39917-0.89874	0.007	0.68586	0.52200-0.90115	0.415	0.74655	0.37433-1.48887	0.037	0.60751	0.39065-0.94476	0.06507	0.12581	0.542	22.7722	23	0.47414	20.2399	22	0.56803
GCST90199632	20	0.294	0.65111	0.29836-1.4209	0.177	0.73972	0.47749-1.14597	0.008	0.64871	0.47045-0.89451	0.551	0.75007	0.29558-1.90344	0.509	0.74441	0.31448-1.76213	-0.00047	0.99198	0.745	16.7457	21	0.7264	16.7455	20	0.66943
GCST90199633	25	0.102	1.25788	0.96660-1.6369	0.04	1.23906	1.00934-1.52105	0.008	1.24634	1.05847-1.46755	0.569	1.16828	0.68975-1.97879	0.017	1.24714	1.05323-1.47676	-0.00268	0.93112	0.712	20.022	23	0.64058	20.0144	22	0.58214
GCST90199634	28	0.289	0.68963	0.35265-1.3486	0.147	0.73152	0.47961-1.11576	0.009	0.64075	0.45913-0.89420	0.061	0.40185	0.16213-0.99598	0.672	0.83449	0.36525-1.90655	-0.01023	0.80665	0.861	17.0619	24	0.84601	17.0006	23	0.80922
GCST90199635	27	0.351	0.63066	0.24600-1.6168	0.111	0.65468	0.38903-1.10171	0.009	0.58771	0.39530-0.87379	0.216	0.52476	0.19580-1.40642	0.4	0.63304	0.22388-1.79001	-0.00963	0.87331	0.801	13.3492	18	0.77043	13.323	17	0.71431
GCST90199636	24	0.439	1.14608	0.81621-1.6092	0.054	1.25494	0.99648-1.58044	0.01	1.34303	1.07158-1.68324	0.03	2.91692	1.16891-7.27893	0.066	1.27949	0.99489-1.64551	0.03662	0.2353	0.163	35.3653	25	0.0818	33.3086	24	0.09773
GCST90199637	20	0.014	1.59214	1.12157-2.2602	0.032	1.3828	1.02864-1.85890	0.01	1.31957	1.06993-1.62746	0.312	1.38718	0.74250-2.59159	0.025	1.45394	1.06319-1.98829	-0.03635	0.20197	0.296	35.3408	32	0.31325	33.5042	31	0.34676
GCST90199638	30	0.004	0.39451	0.21907-0.7104	0.108	0.72763	0.49357-1.07269	0.01	0.70013	0.53292-0.91980	0.723	0.85093	0.35067-2.06485	0.76	0.82728	0.24784-2.76141	0.07845	0.04101	0.138	40.0763	33	0.18503	35.1024	32	0.32321
GCST90199639	26	0.03	1.97434	1.11772-3.4875	0.105	1.42071	0.92939-2.17176	0.011	1.45228	1.09096-1.93326	0.156	1.72541	0.83481-3.56614	0.073	1.47538	0.98565-2.20843	-0.05469	0.23521	0.755	17.4638	21	0.68264	15.9658	20	0.71874
GCST90199640	22	0.982	1.00518	0.64381-1.5694	0.118	0.74982	0.52260-1.07584	0.011	0.74296	0.59156-0.93312	0.325	0.74178	0.41277-1.33301	0.145	0.75663	0.52468-1.09112	-0.05108	0.13186	0.834	24.5289	32	0.82465	22.1338	31	0.87877
GCST90199641	15	0.1	1.99653	0.90732-4.3933	0.322	1.27499	0.78797-2.06303	0.011	1.54389	1.10307-2.16088	0.876	0.92396	0.34542-2.47154	0.714	0.84381	0.34414-2.06894	-0.03476	0.48774	0.66	18.8128	22	0.65686	18.3139	21	0.62906
GCST90199642	34	0.068	1.75634	0.98613-3.1281	0.112	1.43869	0.91855-2.25338	0.013	1.47159	1.08515-1.99564	0.372	1.40904	0.67302-2.94997	0.26	1.36846	0.80328-2.33127	-0.02858	0.48656	0.892	16.4913	24	0.86953	15.9912	23	0.85564
GCST90199643	19	0.08	2.10922	0.94966-4.6846	0.248	1.34135	0.81519-2.20711	0.015	1.57987	1.09340-2.28278	0.36	1.62587	0.58572-4.51315	0.647	1.23146	0.51133-2.96580	-0.03693	0.43131	0.341	25.7537	23	0.31263	25.0227	22	0.29599
GCST90199644	25	0.336	1.39956	0.72020-2.7197	0.098	1.3418	0.94693-1.90134	0.015	1.53578	1.08703-2.16979	0.101	1.91567	0.91849-3.99547	0.147	1.32106	0.92246-1.89192	0.01645	0.74999	0.04	30.6579	17	0.02197	30.4579	16	0.01577
GCST90199645	19	0.211	1.47375	0.81400-2.6683	0.227	1.30011	0.84949-1.98976	0.018	1.40076	1.06049-1.85020	0.085	2.06708	0.93032-4.59286	0.202	1.40364	0.84399-2.33439	-0.00689	0.85081	0.807	21.5575	28	0.80135	21.5215	27	0.76128
GCST90199646	25	0.142	0.70442	0.44829-1.1069	0.193	0.78886	0.55198-1.12739	0.019	0.73891	0.57354-0.95195	0.273	0.65136	0.30789-1.37798	0.187	0.77915	0.54335-1.11729	0.00876	0.80275	0.468	25.6805	25	0.4248	25.6125	24	0.37312
GCST90199647	23	0.575	1.28408	0.54405-3.0307	0.145	1.42453	0.88556-2.29154	0.021	1.61465	1.07323-2.42919	0.261	1.87567	0.64669-5.44019	0.336	1.62338	0.61936-4.25494	0.03644	0.55737	0.09	28.4156	20	0.09992	27.8919	19	0.08553
GCST90199648	28	0.078	0.78587	0.60624-1.0187	0.108	0.82387	0.65072-1.04310	0.021	0.81373	0.68340-0.96892	0.755	1.10413	0.59612-2.04506	0.044	0.78102	0.61974-0.98426	0.00867	0.72462	0.782	26.0267	32	0.76243	25.9003	31	0.72609
GCST90199649	24	0.099	0.44742	0.18169-1.1018	0.274	0.74953	0.44723-1.25616	0.021	0.62726	0.42210-0.93213	0.744	0.85014	0.32613-2.21609	0.735	0.84278	0.31816-2.23245	0.03769	0.42536	0.869	10.9395	17	0.85969	10.2703	16	0.85214
GCST90199650	26	0.574	1.41684	0.42933-4.6757	0.049	1.72657	1.00156-2.97643	0.022	1.59914	1.07112-2.38746	0.104	2.34667	0.88040-6.25499	0.094	2.20864	0.91459-5.33364	0.01334	0.83476	0.273	22.611	19	0.25491	22.5548	18	0.20828
GCST90199651	22	0.847	0.94477	0.53363-1.6727	0.523	0.87989	0.59441-1.30248	0.024	0.7479	0.58097-0.96279	0.488	0.77297	0.37633-1.58763	0.529	0.87297	0.57475-1.32595	-0.03455	0.37814	0.282	35.0145	31	0.28323	34.1047	30	0.27667
GCST90199652	21	0.147	1.70887	0.85072-3.4327	0.138	1.45088	0.88761-2.37161	0.024	1.4903	1.05457-2.10605	0.745	0.84508	0.31089-2.29715	0.729	0.83666	0.30899-2.26542	-0.02262	0.66045	0.302	24.217	22	0.33596	23.9901	21	0.29354
GCST90199653	17	0.53	1.21432	0.66852-2.2058	0.87	1.03803	0.66501-1.62027	0.025	1.41764	1.04517-1.92285	0.628	0.82077	0.37243-1.80880	0.691	0.88901	0.50147-1.57606	0.02334	0.5589	0.473	24.6975	25	0.47942	24.3412	24	0.44223
GCST90199654	33	0.738	1.18342	0.44822-3.1245	0.016	1.96593	1.13234-3.41317	0.027	1.5734	1.05157-2.35419	0.144	2.31363	0.79091-6.76800	0.088	2.31363	0.93154-5.74628	0.03492	0.53476	0.38	18.3955	17	0.36431	17.9441	16	0.32718
GCST90199655	12	0.461	0.81846	0.48299-1.3869	0.097	0.70109	0.46103-1.06616	0.028	0.74322	0.57014-0.96883	0.633	0.82074	0.36700-1.83546	0.34	0.72917	0.38365-1.38588	-0.01173	0.68055	0.537	42.6408	44	0.52993	42.469	43	0.4942
GCST90199656	20	0.944	0.97019	0.42327-2.2238	0.044	1.68777	1.01340-2.81091	0.028	1.50605	1.04561-2.16925	0.189	1.95367	0.74016-5.15678	0.115	2.10483	0.86442-5.12516	0.05545	0.26044	0.215	27.8109	23	0.22302	26.2207	22	0.24233
GCST90199657	17	0.212	1.4284	0.82645-2.4688	0.097	1.46577	0.93256-2.30386	0.028	1.37698	1.03482-1.83227	0.229	1.59054	0.75916-3.33241	0.075	1.51546	0.97425-2.35732	-0.00581	0.87794	0.313	32.5301	29	0.2971	32.5022	28	0.25456
GCST90199658	22	0.025	0.68673	0.50298-0.9376	0.007	0.71394	0.55924-0.91144	0.028	0.81267	0.67570-0.97740	0.892	0.96035	0.53760-1.71555	0.016	0.73117	0.57554-0.92890	0.04478	0.19928	0.446	27.4092	28	0.49606	25.6776	27	0.53654
GCST90199659	18	0.503	0.76475	0.35461-1.6492	0.076	0.65639	0.41208-1.04554	0.029	0.66379	0.45914-0.95968	0.212	0.60581	0.28327-1.29559	0.106	0.64884	0.39395-1.06867	-0.01883	0.68353	0.19	26.0292	19	0.12938	25.7833	18	0.10482
GCST90199660	27	0.16	1.76915	0.82169-3.8091	0.23	1.32452	0.83728-2.09530	0.033	1.42448	1.02944-1.97113	0.596	1.29374	0.50682-3.30248	0.991	1.00576	0.38714-2.61292	-0.02707	0.54753	0.696	18.1521	22	0.69693	17.7784	21	0.66298
GCST90199661	23	0.607	0.84449	0.44649-1.5973	0.415	0.83942	0.55108-1.27862	0.034	0.72218	0.53487-0.97508	0.863	0.93214	0.42280-2.05505	0.917	0.96584	0.50557-1.84515	-0.02411	0.58853	0.411	29.2877	28	0.39804	28.9661	27	0.36254
GCST90199662	17	0.168	1.6489	0.82488-3.2961	0.283	1.26971	0.82135-1.96283	0.034	1.39856	1.02528-1.90773	0.747	1.16077	0.47274-2.85017	0.766	1.13732	0.49148-2.63185	-0.01985	0.60522	0.407	29.1856	28	0.40316	28.8929	27	0.36611
GCST90199663	20	0.178	0.55925	0.24880-1.2571	0.112	0.65526	0.38888-1.10410	0.036	0.68954	0.48720-0.97591	0.124	0.46748	0.18562-1.17729	0.092	0.56309	0.29905-1.06024	0.0235	0.58213	0.845	12.008	18	0.84682	11.6933	17	0.81834
GCST90199664	24	0.383	1.21716	0.78716-1.8820	0.473	1.151	0.78387-1.69007	0.036	1.29665	1.01660-1.65386	0.187	1.59034	0.80996-3.12260	0.506	1.14904	0.76615-1.72329	0.01171	0.73389	0.779	26.2169	33	0.7929	26.0993	32	0.7592
GCST90199665	20	0.196	1.4967	0.82857-2.7036	0.046	1.46768	1.00682-2.13949	0.036	1.34606	1.01945-1.77731	0.123	1.76323	0.88138-3.52740	0.045	1.69215	1.04252-2.74659	-0.01682	0.69438	0.961	12.0776	22	0.95576	11.9189	21	0.94178
GCST90199666	29	0.365	1.43717	0.66603-3.1012	0.251	0.75966	0.47533-1.21407	0.038	0.69278	0.49002-0.97942	0.805	0.88887	0.35285-2.23917	0.683	0.84757	0.38733-1.85466	-0.09263	0.05171	0.318	27.7381	24	0.27124	23.4455	23	0.43502
GCST90199667	22	0.572	1.09731	0.79804-1.5088	0.082	1.22169	0.97518-1.53052	0.038	1.25599	1.01218-1.55852	0.267	1.42018	0.77400-2.60581	0.079	1.22043	0.98484-1.51238	0.03429	0.26969	0.082	43.6898	29	0.03926	41.7969	28	0.04531
GCST90199668	22	0.983	1.00856	0.47180-2.1559	0.148	0.70034	0.43218-1.13487	0.039	0.6947	0.49190-0.98111	0.312	0.62713	0.25865-1.52059	0.195	0.67674	0.38137-1.20088	-0.05957	0.29188	0.131	34.4231	24	0.07742	32.7653	23	0.08524
GCST90199669	21	0.831	0.91274	0.39919-2.0870	0.211	0.71989	0.43014-1.20482	0.039	0.68458	0.47791-0.98063	0.666	0.78432	0.26326-2.33671	0.672	0.8014	0.29136-2.20428	-0.03131	0.45647	0.645	22.1711	25	0.62585	21.5981	24	0.60324
GCST90199670	17	0.865	1.09367	0.39411-3.0349	0.154	1.4358	0.87329-2.36064	0.04	1.51704	1.01847-2.25965	0.172	1.96551	0.77084-5.01174	0.209	1.96551	0.70698-5.46444	0.03528	0.50174	0.301	24.4612	21	0.27125	23.9018	20	0.24671
GCST90199671	18	0.023	2.65181	1.20923-5.8154	0.041	1.61813	1.01906-2.56935	0.04	1.44234	1.01708-2.04540	0.211	1.7799	0.73905-4.28662	0.193	1.74615	0.77210-3.94906	-0.07226	0.10599	0.326	27.1027	24	0.29969	24.1324	23	0.39651
GCST90199672	26	0.351	1.44105	0.68268-3.0419	0.16	1.4216	0.87056-2.32144	0.042	1.46882	1.01331-2.12911	0.48	1.36761	0.58468-3.19893	0.48	1.36761	0.58419-3.20165	0.00296	0.95465	0.962	9.43475	18	0.94881	9.43142	17	0.92575
GCST90199673	45	0.07	2.62035	1.00537-6.8295	0.224	1.43195	0.80230-2.55575	0.042	1.55868	1.01642-2.39024	0.503	1.43189	0.51496-3.98155	0.501	1.40163	0.53803-3.65136	-0.09065	0.2562	0.692	11.2584	14	0.66563	9.84771	13	0.70634
GCST90199674	20	0.623	0.85913	0.47242-1.5624	0.576	1.14094	0.71841-1.81197	0.043	1.35611	1.00937-1.82197	0.708	1.19591	0.47388-3.01804	0.513	1.19591	0.70445-2.03023	0.05919	0.10121	0.329	27.9018	26	0.36331	25.0053	25	0.46208
GCST90199675	28	0.311	1.56805	0.67191-3.6594	0.169	1.45997	0.85171-2.50261	0.043	1.475	1.01252-2.14873	0.923	0.9509	0.34770-2.60059	0.958	1.02846	0.36940-2.86339	-0.00787	0.87621	0.583	18.2214	20	0.57283	18.1964	19	0.50936
GCST90199676	32	0.511	0.78128	0.37944-1.6087	0.117	0.74443	0.51461-1.07689	0.043	0.69437	0.48753-0.98897	0.337	0.68854	0.32694-1.45008	0.19	0.77952	0.54364-1.11775	-0.0189	0.71559	0.015	41.4351	21	0.00495	41.154	20	0.00356
GCST90199677	21	0.126	0.48533	0.19981-1.1788	0.017	0.54287	0.32804-0.89840	0.047	0.69138	0.48001-0.99582	0.162	0.48374	0.18131-1.29065	0.161	0.49398	0.19074-1.27936	0.04452	0.40078	0.497	21.1787	21	0.44808	20.426	20	0.43158
GCST90199678	17	0.001	0.28338	0.13999-0.5736	0.299	0.8043	0.53314-1.21336	0.047	0.73123	0.53694-0.99582	0.827	0.90215	0.36012-2.25999	0.644	0.79141	0.29629-2.11393	0.11397	0.00751	0.05	44.2067	31	0.05854	34.6989	30	0.25376
GCST90199679	21	0.729	1.16902	0.48850-2.7975	0.149	1.43122	0.87980-2.32823	0.048	1.43674	1.00347-2.05709	0.413	1.44618	0.60844-3.43737	0.371	1.47716	0.63947-3.41219	0.0268	0.61558	0.182	26.7025	21	0.18092	26.3595	20	0.15426
GCST90199680	21	0.243	0.61294	0.27690-1.3568	0.235	0.73789	0.44682-1.21857	0.049	0.69581	0.48520-0.99784	0.448	0.68293	0.26043-1.79087	0.489	0.74484	0.32841-1.68933	0.01754	0.72968	0.603	16.7095	19	0.60954	16.5863	18	0.5517
GCST90199681	20	0.534	0.7337	0.28236-1.9065	0.142	0.66364	0.38381-1.14750	0.05	0.66229	0.43880-0.99961	0.508	0.6897	0.23477-2.02622	0.475	0.69793	0.26601-1.83117	-0.01448	0.81757	0.386	18.3453	17	0.36738	18.2825	16	0.30762
GCST90199682	28	0.133	0.60292	0.31879-1.1403	0.428	0.84235	0.55100-1.28774	0.05	0.74355	0.55271-1.00029	0.842	0.92566	0.43697-1.96085	0.819	0.9153	0.43309-1.93441	0.02857	0.4736	0.464	23.4696	24	0.49224	22.9388	23	0.46435
GCST90199683	29	0.033	1.53094	1.06162-2.2077	0.022	1.42027	1.05170-1.91801	0.051	1.26256	0.99891-1.59580	0.569	1.24811	0.58907-2.64448	0.023	1.41697	1.07091-1.87487	-0.04575	0.19778	0.375	23.8934	23	0.40973	22.1201	22	0.45274
GCST90199684	17	0.363	0.72845	0.37158-1.4280	0.033	0.6683	0.46154-0.96769	0.052	0.77408	0.59765-1.00259	0.253	0.64817	0.31184-1.34725	0.11	0.59793	0.32324-1.10604	0.00821	0.84915	0.955	23.3151	36	0.94924	23.2784	35	0.93515
GCST90199685	23	0.952	1.01049	0.72347-1.4114	0.732	0.94947	0.70548-1.27784	0.052	0.80444	0.64576-1.00210	0.529	0.81412	0.43254-1.53231	0.647	0.93077	0.68666-1.26166	-0.04575	0.08631	0.537	28.0356	30	0.56855	24.8831	29	0.6843
GCST90199686	17	0.553	0.86052	0.52709-1.4049	0.099	0.72596	0.49639-1.06168	0.054	0.79021	0.62188-1.00412	0.654	0.85908	0.44523-1.65761	0.135	0.71407	0.46465-1.09739	-0.01241	0.69881	0.774	25.1861	31	0.75933	25.0335	30	0.7234
GCST90199687	25	0.588	1.23993	0.57568-2.6706	0.056	1.55417	0.98902-2.44225	0.055	1.37342	0.99277-1.90003	0.272	1.7803	0.65025-4.87428	0.238	1.7803	0.69861-4.53684	0.01156	0.77563	0.67	21.6143	25	0.65791	21.5312	24	0.60722
GCST90199688	24	0.245	1.45498	0.78134-2.7094	0.213	1.24928	0.87986-1.77382	0.056	1.2785	0.99327-1.64564	0.842	1.08257	0.49936-2.34692	0.729	1.12843	0.57253-2.22408	-0.01609	0.65824	0.934	24.727	37	0.93876	24.528	36	0.92635
GCST90199689	23	0.89	0.94381	0.41972-2.1223	0.818	1.06003	0.64457-1.74327	0.057	1.43146	0.98959-2.07062	0.75	1.15539	0.48145-2.77270	0.923	0.95932	0.41893-2.19678	0.06273	0.27346	0.225	22.9699	19	0.23867	21.4493	18	0.25735
GCST90199690	17	0.259	0.50121	0.15819-1.5880	0.077	0.58042	0.31775-1.06022	0.058	0.62574	0.38519-1.01652	0.436	0.63918	0.21316-1.91661	0.366	0.61321	0.21906-1.71654	0.02378	0.68173	0.168	22.0421	16	0.14184	21.788	15	0.11348
GCST90199691	32	0.294	0.79572	0.52534-1.2053	0.254	0.81788	0.57883-1.15565	0.058	0.78432	0.61033-1.00789	0.389	0.75552	0.40433-1.41172	0.22	0.81267	0.58913-1.12103	-0.00305	0.9327	0.674	18.0947	21	0.64301	18.0873	20	0.58165
GCST90199692	25	0.509	1.24757	0.65641-2.3711	0.11	0.71426	0.47292-1.07876	0.059	0.74985	0.55590-1.01147	0.639	0.80089	0.32186-1.99285	0.141	0.7092	0.45790-1.09843	-0.08491	0.09825	0.463	18.519	18	0.42199	15.4586	17	0.56248
GCST90199693	15	0.22	1.27466	0.87795-1.8506	0.024	1.43184	1.04731-1.95756	0.059	1.27525	0.99086-1.64125	0.204	1.71942	0.76989-3.84006	0.032	1.45644	1.06165-1.99805	0.00011	0.99734	0.474	17.2524	17	0.43739	17.2524	16	0.36945
GCST90199694	26	0.042	0.58246	0.35865-0.9459	0.072	0.74162	0.53547-1.02714	0.059	0.7919	0.62138-1.00921	0.61	0.85965	0.48511-1.52334	0.097	0.75386	0.54867-1.03579	0.05392	0.1688	0.65	16.7106	19	0.60947	14.6551	18	0.6855
GCST90199695	16	0.366	0.71382	0.34816-1.4635	0.012	0.57325	0.37056-0.88680	0.059	0.74165	0.54408-1.01096	0.093	0.45893	0.19076-1.10413	0.08	0.46983	0.20843-1.05905	0.00487	0.90836	0.455	27.5568	27	0.43409	27.5424	26	0.38133
GCST90199696	25	0.626	1.13821	0.68034-1.9042	0.049	1.46994	1.00114-2.15827	0.059	1.3028	0.99003-1.71438	0.219	1.66259	0.75251-3.67332	0.147	1.72167	0.84290-3.51663	0.02368	0.54623	0.414	30.2623	29	0.401	29.8643	28	0.36973
GCST90199697	25	0.826	0.93387	0.51159-1.7047	0.191	0.76605	0.51366-1.14246	0.061	0.74221	0.54336-1.01381	0.956	1.022	0.47759-2.18701	0.289	0.78747	0.51242-1.21015	-0.04232	0.39163	0.182	26.8186	20	0.14044	25.7761	19	0.13655
GCST90199698	32	0.343	0.85412	0.62066-1.1754	0.192	0.84671	0.65957-1.08694	0.063	0.82477	0.67307-1.01067	0.09	0.57139	0.30676-1.06428	0.206	0.85061	0.66610-1.08623	-0.00679	0.78318	0.839	18.9212	25	0.80088	18.8438	24	0.76027
GCST90199699	25	0.777	0.82626	0.22353-3.0542	0.296	0.75814	0.45115-1.27401	0.063	0.65259	0.41638-1.02279	0.685	0.78197	0.24166-2.53029	0.646	0.78197	0.27759-2.20276	-0.02998	0.70916	0.009	44.8559	24	0.00606	44.5795	23	0.00447
GCST90199700	11	0.491	1.2791	0.64051-2.5544	0.085	1.42432	0.95191-2.13118	0.063	1.32294	0.98546-1.77599	0.515	0.77763	0.36781-1.64409	0.245	1.36091	0.81812-2.26382	0.00438	0.91635	0.097	40.3989	30	0.09737	40.3832	29	0.07786
GCST90199701	25	0.139	1.93981	0.84243-4.4667	0.139	1.48758	0.87926-2.51677	0.064	1.4405	0.97967-2.11810	0.408	1.5267	0.57492-4.05410	0.395	1.51261	0.59748-3.82939	-0.03748	0.44184	0.811	12.2445	17	0.78511	11.6225	16	0.76953
GCST90199702	22	0.282	1.50475	0.72742-3.1127	0.112	1.45166	0.91677-2.29863	0.064	1.37948	0.98092-1.93998	0.394	1.47002	0.61554-3.51067	0.4	1.44613	0.62201-3.36213	-0.01222	0.79307	0.76	19.0562	24	0.74899	18.9857	23	0.70205
GCST90199703	25	0.365	0.86492	0.63603-1.1762	0.453	0.9104	0.71227-1.16364	0.066	0.8232	0.66923-1.01258	0.192	0.63318	0.32500-1.23358	0.342	0.89694	0.72008-1.11725	-0.01582	0.66908	0.179	29.0088	23	0.18002	28.7634	22	0.15174
GCST90199704	21	0.677	1.11593	0.66932-1.8606	0.72	0.92558	0.60689-1.41163	0.068	0.7795	0.59664-1.01840	0.966	0.98425	0.47912-2.02194	0.892	0.96436	0.57439-1.61907	-0.06192	0.11774	0.587	27.1267	29	0.56487	24.5217	28	0.65372
GCST90199705	21	0.685	0.73569	0.17459-3.1001	0.126	0.59417	0.30494-1.15776	0.068	0.60142	0.34840-1.03820	0.431	0.58515	0.16214-2.11180	0.397	0.57754	0.17030-1.95859	-0.02241	0.771	0.23	14.6944	11	0.19692	14.5641	10	0.14878
GCST90199706	23	0.956	1.01934	0.52219-1.9898	0.298	1.25126	0.82054-1.90805	0.068	1.3261	0.97945-1.79545	0.595	1.26377	0.53928-2.96160	0.516	1.29668	0.59978-2.80333	0.04064	0.3965	0.795	17.2964	23	0.79446	16.5486	22	0.78776
GCST90199707	27	0.262	1.48123	0.75889-2.8911	0.091	1.46252	0.94152-2.27182	0.071	1.34351	0.97477-1.85173	0.363	1.54259	0.61714-3.85582	0.451	1.45053	0.56024-3.75558	-0.01417	0.74606	0.44	23.6324	23	0.42439	23.5174	22	0.37302
GCST90199708	22	0.225	1.55413	0.77499-3.1166	0.352	1.22987	0.79567-1.90100	0.073	1.31638	0.97497-1.77736	0.907	1.04794	0.48048-2.28559	0.754	1.11514	0.56767-2.19062	-0.02101	0.60824	0.7	24.683	29	0.69459	24.4142	28	0.6595
GCST90199709	23	0.174	0.6826	0.39915-1.1673	0.107	0.72807	0.49482-1.07126	0.073	0.79367	0.61664-1.02153	0.139	0.59252	0.30227-1.16150	0.116	0.68004	0.42665-1.08392	0.02394	0.53784	0.948	17.1791	28	0.94497	16.7896	27	0.93618
GCST90199710	23	0.043	2.69175	1.09871-6.5946	0.133	1.49522	0.88451-2.52761	0.073	1.41391	0.96772-2.06583	0.429	1.48062	0.57046-3.84297	0.417	1.49662	0.57721-3.88047	-0.0821	0.13661	0.729	16.0345	20	0.71448	13.6187	19	0.80545
GCST90199711	21	0.271	0.64953	0.30840-1.3680	0.497	0.86967	0.58116-1.30142	0.073	0.77662	0.58890-1.02416	0.986	0.99346	0.47232-2.08960	0.969	0.9855	0.47356-2.05088	0.03231	0.61753	0.449	19.3233	19	0.43628	19.05	18	0.38875
GCST90199712	17	0.146	0.66087	0.38554-1.1328	0.25	0.81701	0.57897-1.15290	0.074	0.79376	0.61631-1.02232	0.57	0.8154	0.40736-1.63217	0.481	0.78919	0.41272-1.50909	0.03139	0.45723	0.441	23.4416	23	0.43525	22.8469	22	0.41042
GCST90199713	25	0.732	1.10404	0.63014-1.9344	0.115	1.3912	0.92238-2.09829	0.074	1.26189	0.97781-1.62849	0.23	1.59578	0.75456-3.37484	0.083	1.45701	0.96339-2.20354	0.02082	0.60247	0.394	35.8474	34	0.38182	35.5495	33	0.3491
GCST90199714	29	0.431	0.76272	0.39301-1.4802	0.081	0.67409	0.43253-1.05054	0.075	0.73786	0.52771-1.03170	0.396	0.68457	0.28966-1.61788	0.325	0.67698	0.31587-1.45094	-0.00563	0.90989	0.183	31.4702	25	0.17392	31.4531	24	0.14114
GCST90199715	20	0.18	2.03075	0.74979-5.5001	0.604	1.15101	0.67664-1.95794	0.076	1.38997	0.96667-1.99863	0.496	0.67293	0.21977-2.06051	0.508	0.67293	0.21278-2.12822	-0.04738	0.4331	0.59	18.3576	20	0.56387	17.7161	19	0.54147
GCST90199716	16	0.192	2.38493	0.66769-8.5188	0.016	1.80872	1.11790-2.92645	0.076	1.53612	0.95542-2.46975	0.064	3.08563	0.98221-9.69357	0.052	2.77731	1.03254-7.47040	-0.04829	0.47091	<0.001	72.6532	29	1e-05	71.293	28	1e-05
GCST90199717	28	0.139	0.52054	0.22650-1.1963	0.44	0.82292	0.50198-1.34905	0.076	0.7261	0.51016-1.03344	0.819	1.11936	0.43073-2.90895	0.76	1.16774	0.43657-3.12352	0.03671	0.39643	0.854	14.7086	22	0.87444	13.9592	21	0.87135
GCST90199718	17	0.896	0.95062	0.44951-2.0103	0.371	1.21185	0.79521-1.84680	0.077	1.31694	0.97077-1.78655	0.629	1.23182	0.53399-2.84156	0.709	1.16905	0.51979-2.62926	0.04386	0.35891	0.545	26.1643	27	0.5095	25.292	26	0.5025
GCST90199719	27	0.973	0.98585	0.43524-2.2330	0.516	1.17135	0.72694-1.88746	0.078	1.44015	0.95974-2.16103	0.783	1.14161	0.44835-2.90686	0.793	1.12621	0.46694-2.71630	0.06323	0.306	0.051	38.3455	25	0.04279	36.6738	24	0.04715
GCST90199720	26	0.312	0.63997	0.27727-1.4771	0.01	1.8848	1.16474-3.05002	0.078	1.39198	0.96346-2.01110	0.048	2.42959	1.07774-5.47714	0.084	2.37169	0.94641-5.94339	0.11162	0.06485	0.321	18.7903	16	0.27969	14.8206	15	0.46441
GCST90199721	26	0.423	1.513	0.56253-4.0694	0.05	1.73386	1.00102-3.00318	0.079	1.43478	0.95917-2.14623	0.199	1.88161	0.74141-4.77531	0.11	1.8585	0.90105-3.83333	-0.0065	0.90913	0.3	22.3235	19	0.26846	22.3068	18	0.21865
GCST90199722	26	0.227	1.54347	0.78221-3.0456	0.234	1.31532	0.83740-2.06602	0.08	1.30303	0.96877-1.75262	0.832	0.92258	0.44342-1.91953	0.265	1.32446	0.82021-2.13870	-0.02353	0.59402	0.663	16.686	19	0.61113	16.3915	18	0.56524
GCST90199723	15	0.035	0.38266	0.16685-0.8776	0.243	0.72319	0.41978-1.24592	0.081	0.69529	0.46221-1.04592	0.661	1.3158	0.39307-4.40463	0.869	1.10141	0.35471-3.42002	0.08588	0.12585	0.228	24.9874	20	0.20191	22.0168	19	0.28342
GCST90199724	19	0.962	0.98018	0.43527-2.2073	0.056	0.6422	0.40788-1.01115	0.085	0.7443	0.53174-1.04181	0.285	0.61306	0.25662-1.46458	0.228	0.59675	0.26482-1.34472	-0.03551	0.47347	0.372	20.795	19	0.34824	20.1936	18	0.32203
GCST90199725	21	0.91	1.03042	0.61658-1.7221	0.118	0.73394	0.49801-1.08162	0.085	0.79055	0.60482-1.03333	0.515	0.74448	0.31005-1.78760	0.15	0.72829	0.47896-1.10741	-0.04154	0.24833	0.417	27.1729	26	0.40031	25.7348	25	0.42186
GCST90199726	22	0.921	0.96671	0.49948-1.8710	0.342	0.80359	0.51169-1.26202	0.086	0.76013	0.55579-1.03959	0.883	0.93445	0.38307-2.27948	0.8	0.89924	0.39907-2.02631	-0.03046	0.4253	0.804	19.7219	26	0.80455	19.065	25	0.79399
GCST90199727	17	0.775	0.88076	0.37249-2.0826	0.318	0.78567	0.48914-1.26197	0.09	0.71454	0.48450-1.05381	0.234	0.56688	0.22831-1.40754	0.26	0.59804	0.25036-1.42858	-0.02644	0.59748	0.222	27.824	22	0.18159	27.4483	21	0.1565
GCST90199728	12	0.492	1.08844	0.85738-1.3818	0.875	0.98257	0.78875-1.22401	0.09	0.86385	0.72954-1.02290	0.73	0.90416	0.51303-1.59351	0.78	0.97299	0.80440-1.17691	-0.0607	0.0116	0.649	26.7575	31	0.6843	19.5289	30	0.92823
GCST90199729	26	0.322	1.4699	0.69414-3.1126	0.758	1.07037	0.69462-1.64939	0.092	1.29545	0.95843-1.75098	0.33	0.66138	0.29187-1.49873	0.402	0.72303	0.34229-1.52726	-0.01536	0.72035	0.173	37.9531	31	0.18198	37.7886	30	0.15525
GCST90199730	22	0.977	1.01157	0.46852-2.1841	0.1	0.73053	0.50243-1.06219	0.092	0.78616	0.59408-1.04035	0.251	0.65502	0.32365-1.32568	0.199	0.65502	0.34914-1.22887	-0.03322	0.49727	0.882	17.1372	25	0.87676	16.6622	24	0.86271
GCST90199731	22	0.243	1.31595	0.83774-2.0671	0.077	1.37645	0.96619-1.96089	0.092	1.2354	0.96573-1.58039	0.836	0.91942	0.41796-2.02251	0.184	1.28925	0.89399-1.85927	-0.0106	0.74609	0.754	23.8228	29	0.73762	23.7159	28	0.69644
GCST90199732	34	0.413	1.09473	0.88487-1.3544	0.356	1.0877	0.90993-1.30021	0.092	1.12929	0.98024-1.30101	0.26	1.35086	0.81059-2.25124	0.327	1.08895	0.92151-1.28683	0.01232	0.70495	0.946	14.4771	24	0.93513	14.3301	23	0.91703
GCST90199733	26	0.209	0.61285	0.29055-1.2927	0.097	0.69346	0.45017-1.06822	0.095	0.7667	0.56121-1.04743	0.398	0.71508	0.33266-1.53712	0.259	0.6982	0.37895-1.28643	0.02872	0.52187	0.072	39.8788	28	0.06779	39.2664	27	0.05991
GCST90199734	19	0.203	0.83944	0.64591-1.0910	0.202	0.86176	0.68572-1.08299	0.096	0.86756	0.73386-1.02563	0.962	0.98861	0.62208-1.57110	0.27	0.89339	0.73457-1.08655	0.00903	0.7515	0.65	21.6323	25	0.65688	21.5297	24	0.60731
GCST90199735	24	0.965	1.02191	0.38989-2.6784	0.096	1.53982	0.92562-2.56157	0.096	1.37087	0.94519-1.98825	0.38	1.43546	0.65543-3.14382	0.262	1.54809	0.74046-3.23661	0.03865	0.52695	0.784	11.4749	16	0.77927	11.0554	15	0.74866
GCST90199736	20	0.798	0.8716	0.30988-2.4516	0.025	1.88542	1.08258-3.28362	0.097	1.41171	0.93997-2.12022	0.161	2.13862	0.77799-5.87886	0.142	2.15328	0.81730-5.67309	0.05802	0.33706	0.801	10.3771	15	0.79538	9.38887	14	0.80536
GCST90199737	19	0.651	0.89585	0.55839-1.4373	0.196	0.77953	0.53459-1.13671	0.097	0.81191	0.63466-1.03867	0.425	0.75727	0.38557-1.48728	0.306	0.76557	0.46247-1.26730	-0.01588	0.63598	0.662	29.3165	33	0.65118	29.0882	32	0.61468
GCST90199738	23	0.316	1.40906	0.73352-2.7067	0.082	1.52877	0.94774-2.46600	0.1	1.30908	0.94977-1.80433	0.331	1.53751	0.65954-3.58424	0.124	1.53751	0.90934-2.59960	-0.01097	0.80243	0.873	13.036	20	0.87584	12.9716	19	0.84002
GCST90199739	17	0.109	0.59155	0.31671-1.1049	0.204	0.77642	0.52547-1.14721	0.101	0.80341	0.61845-1.04368	0.549	0.81005	0.40917-1.60368	0.315	0.72777	0.39485-1.34140	0.0373	0.29773	0.942	23.309	35	0.93454	22.1906	34	0.9405
GCST90199740	21	0.578	0.81826	0.40778-1.6420	0.118	0.74025	0.50743-1.07987	0.101	0.75553	0.54042-1.05626	0.788	0.89842	0.41481-1.94588	0.234	0.78304	0.52917-1.15871	-0.0132	0.79902	0.015	41.4484	23	0.01052	41.3237	22	0.00754
GCST90199741	26	0.065	0.5117	0.26581-0.9851	0.301	0.80471	0.53329-1.21427	0.102	0.78731	0.59093-1.04894	0.891	0.95197	0.47608-1.90358	0.212	0.76518	0.51188-1.14383	0.07494	0.17344	0.779	10.704	15	0.77328	8.64666	14	0.853
GCST90199742	30	0.259	1.64278	0.70642-3.8203	0.741	1.08851	0.65793-1.80090	0.103	1.39272	0.93532-2.07380	0.775	0.84739	0.27501-2.61106	0.766	0.83568	0.25925-2.69382	-0.02227	0.66571	0.053	40.7377	28	0.05675	40.4518	27	0.04646
GCST90199743	21	0.005	2.86371	1.50165-5.4612	0.073	1.51335	0.96181-2.38117	0.104	1.33956	0.94162-1.90567	0.43	1.43339	0.59675-3.44296	0.224	1.48811	0.80003-2.76800	-0.11645	0.01592	0.239	24.8134	20	0.20866	17.8089	19	0.53524
GCST90199744	22	0.445	0.74553	0.35447-1.5680	0.33	1.22334	0.81536-1.83545	0.104	1.29953	0.94737-1.78259	0.722	1.16109	0.51430-2.62132	0.708	1.16109	0.53510-2.51941	0.07013	0.11754	0.128	42.1808	32	0.10755	38.926	31	0.15509
GCST90199745	23	0.508	0.89528	0.65038-1.2324	0.167	0.84626	0.66799-1.07211	0.104	0.826	0.65597-1.04009	0.471	0.78934	0.42107-1.47967	0.2	0.84202	0.65439-1.08346	-0.02653	0.47948	0.412	18.831	16	0.27753	18.1931	15	0.25265
GCST90199746	20	0.061	0.5927	0.35124-1.0001	0.323	0.80426	0.52194-1.23928	0.105	0.80126	0.61303-1.04729	0.222	0.61804	0.29054-1.31470	0.405	0.81659	0.51057-1.30605	0.04488	0.20011	0.669	23.758	27	0.6437	22.0297	26	0.68707
GCST90199747	26	0.608	1.28446	0.50100-3.2931	0.35	1.29073	0.75609-2.20340	0.105	1.38872	0.93377-2.06535	0.963	1.0258	0.35923-2.92917	0.982	1.01304	0.32332-3.17409	0.00859	0.85887	0.382	22.4839	21	0.3721	22.4474	20	0.31673
GCST90199748	24	0.329	0.60338	0.22378-1.6269	0.062	0.61145	0.36464-1.02533	0.105	0.73947	0.51355-1.06478	0.246	0.55494	0.21057-1.46249	0.231	0.55494	0.21730-1.41717	0.02164	0.67002	0.881	14.2953	22	0.89067	14.1085	21	0.86489
GCST90199749	39	0.529	0.88982	0.62177-1.2734	0.067	0.76994	0.58193-1.01870	0.106	0.84435	0.68779-1.03653	0.662	0.87246	0.47671-1.59675	0.091	0.78491	0.59855-1.02929	-0.01102	0.72935	0.867	18.8003	27	0.87716	18.678	26	0.84973
GCST90199750	26	0.163	1.31351	0.90959-1.8968	0.136	1.22951	0.93704-1.61327	0.106	1.20565	0.96123-1.51222	0.401	0.71155	0.32749-1.54603	0.176	1.21843	0.92510-1.60478	-0.02068	0.56453	0.55	19.3815	19	0.43262	19.0176	18	0.39074
GCST90199751	26	0.056	2.05391	1.01249-4.1665	0.182	1.31354	0.87999-1.96070	0.107	1.29334	0.94560-1.76896	0.448	1.40543	0.59108-3.34173	0.487	1.46623	0.50603-4.24841	-0.06302	0.16612	0.024	40.5321	28	0.05924	37.7035	27	0.08267
GCST90199752	24	0.09	0.71778	0.49558-1.0396	0.106	0.78325	0.58246-1.05327	0.107	0.83797	0.67594-1.03886	0.496	0.80505	0.43475-1.49076	0.14	0.78978	0.58210-1.07154	0.02628	0.32288	0.785	24.4982	30	0.74903	23.4868	29	0.75381
GCST90199753	24	0.767	0.88034	0.38172-2.0303	0.075	0.66777	0.42833-1.04106	0.107	0.76462	0.55179-1.05955	0.201	0.53448	0.20974-1.36202	0.207	0.57801	0.25222-1.32466	-0.01711	0.72176	0.45	26.6046	26	0.43029	26.4673	25	0.38301
GCST90199754	24	0.128	0.4185	0.14346-1.2209	0.646	0.88068	0.51200-1.51484	0.107	0.72816	0.49500-1.07113	0.942	0.96309	0.35359-2.62325	0.998	0.99843	0.37191-2.68037	0.05619	0.29139	0.594	16.9586	19	0.59267	15.7771	18	0.6081
GCST90199755	34	0.05	1.45696	1.01949-2.0821	0.141	1.2272	0.93427-1.61198	0.108	1.18766	0.96278-1.46507	0.174	1.50977	0.84885-2.68527	0.112	1.23981	0.96037-1.60055	-0.04157	0.17878	0.531	23.7471	24	0.47614	21.8236	23	0.53092
GCST90199756	33	0.231	2.10135	0.64543-6.8415	0.072	1.52888	0.96242-2.42875	0.109	1.39397	0.92908-2.09146	0.108	2.26857	0.87023-5.91390	0.106	1.95247	0.89772-4.24646	-0.0562	0.4754	0.018	40.3018	22	0.00997	39.313	21	0.009
GCST90199757	26	0.175	0.4924	0.18546-1.3073	0.906	1.03346	0.59700-1.78901	0.11	0.71816	0.47872-1.07735	0.792	1.12925	0.46410-2.74771	0.823	1.1107	0.44825-2.75214	0.04756	0.41803	0.831	10.7953	16	0.82194	10.1017	15	0.81329
GCST90199758	33	0.562	0.82827	0.44204-1.5520	0.115	0.72041	0.47923-1.08297	0.11	0.79945	0.60768-1.05174	0.302	0.69949	0.36016-1.35852	0.187	0.70494	0.42574-1.16722	-0.00516	0.90332	0.893	15.4896	23	0.87623	15.4745	22	0.84108
GCST90199759	26	0.854	0.94404	0.51475-1.7314	0.506	1.14085	0.77402-1.68154	0.11	1.24086	0.95210-1.61719	0.972	1.01418	0.46939-2.19128	0.779	0.91291	0.48521-1.71760	0.04089	0.33417	0.847	21.7244	30	0.86388	20.7599	29	0.86775
GCST90199760	33	0.134	0.49177	0.20201-1.1972	0.16	0.7047	0.43224-1.14890	0.111	0.71871	0.47895-1.07848	0.851	1.09434	0.43350-2.76256	0.251	0.72921	0.43174-1.23164	0.05031	0.35843	0.017	37.1496	21	0.01618	35.5777	20	0.01723
GCST90199761	26	0.666	0.84094	0.38525-1.8356	0.285	1.24377	0.83361-1.85574	0.112	1.3021	0.94032-1.80307	0.684	0.83232	0.34590-2.00276	0.961	0.98444	0.53143-1.82361	0.05925	0.2356	<0.001	68.7979	37	0.00115	66.1253	36	0.00162
GCST90199762	32	0.751	1.12225	0.55542-2.2676	0.249	1.2818	0.84058-1.95461	0.113	1.3014	0.93965-1.80242	0.98	1.0099	0.46982-2.17086	0.567	1.20661	0.64049-2.27311	0.02185	0.64447	0.284	27.0453	23	0.25404	26.7789	22	0.21975
GCST90199763	29	0.712	1.16289	0.52863-2.5581	0.435	1.20834	0.75131-1.94341	0.114	1.32065	0.93536-1.86465	0.247	1.68238	0.71706-3.94722	0.616	1.20901	0.58296-2.50740	0.01891	0.72913	0.949	10.2394	19	0.94679	10.1157	18	0.92807
GCST90199764	19	0.408	1.62088	0.53560-4.9053	0.679	1.14982	0.59392-2.22603	0.115	1.47908	0.90917-2.40622	0.648	0.74083	0.21045-2.60786	0.641	0.75729	0.24119-2.37769	-0.01126	0.85837	0.281	16.4323	14	0.28769	16.3906	13	0.22868
GCST90199765	19	0.548	0.89251	0.61886-1.2872	0.246	0.83146	0.60852-1.13608	0.117	0.84053	0.67622-1.04476	0.355	1.4079	0.69021-2.87184	0.233	0.81686	0.59006-1.13085	-0.0127	0.69177	0.554	26.5366	27	0.489	26.3735	26	0.44273
GCST90199766	17	0.713	1.11338	0.63184-1.9619	0.113	1.33484	0.93404-1.90764	0.118	1.21558	0.95192-1.55227	0.164	1.81043	0.80130-4.09044	0.205	1.70908	0.75954-3.84570	0.01298	0.73814	0.504	28.7175	29	0.47985	28.6011	28	0.43296
GCST90199767	32	0.409	1.26134	0.73165-2.1745	0.021	1.57188	1.07018-2.30877	0.119	1.2618	0.94214-1.68992	0.173	1.85228	0.77619-4.42023	0.148	1.82775	0.81988-4.07458	7e-05	0.99875	0.106	50.3348	39	0.10555	50.3348	38	0.08688
GCST90199768	20	0.667	0.84162	0.38833-1.8240	0.133	0.70617	0.44875-1.11124	0.12	0.75583	0.53091-1.07603	0.34	0.64628	0.26865-1.55470	0.323	0.63816	0.26728-1.52369	-0.0136	0.76245	0.999	7.76979	22	0.99772	7.67602	21	0.99637
GCST90199769	21	0.498	0.66144	0.20760-2.1074	0.905	1.03607	0.57913-1.85355	0.12	1.40453	0.91547-2.15485	0.701	0.82689	0.31976-2.13831	0.78	0.89123	0.40455-1.96338	0.08729	0.19559	0.757	9.51925	13	0.73269	7.64064	12	0.81254
GCST90199770	22	0.226	1.6679	0.74912-3.7135	0.134	1.51476	0.87963-2.60848	0.12	1.35941	0.92320-2.00173	0.202	1.98293	0.71901-5.46864	0.299	1.72497	0.63382-4.69460	-0.0341	0.57432	0.748	14.8251	19	0.73365	14.4978	18	0.69611
GCST90199771	23	0.252	1.53263	0.74956-3.1338	0.776	1.06121	0.70539-1.59652	0.12	1.27773	0.93801-1.74048	0.934	0.9633	0.39967-2.32177	0.833	0.90977	0.38108-2.17196	-0.02156	0.58499	0.938	17.8924	28	0.92883	17.5869	27	0.91564
GCST90199772	40	0.256	1.30335	0.83273-2.0400	0.366	1.15528	0.84508-1.57934	0.121	1.19243	0.95485-1.48913	0.685	1.11909	0.65282-1.91838	0.664	1.08313	0.75820-1.54732	-0.01451	0.6575	0.685	25.4822	29	0.653	25.2814	28	0.61248
GCST90199773	20	0.345	1.51305	0.65300-3.5058	0.272	0.77334	0.48896-1.22312	0.121	0.76449	0.54453-1.07329	0.63	0.80085	0.32877-1.95075	0.687	0.83767	0.35772-1.96155	-0.08744	0.09574	0.857	16.1497	23	0.84879	13.1203	22	0.92975
GCST90199774	24	0.443	0.77063	0.40162-1.4787	0.592	1.1381	0.70896-1.82703	0.121	1.33503	0.92646-1.92378	0.74	0.86331	0.36650-2.03356	0.782	0.88378	0.37225-2.09820	0.08244	0.06651	0.365	21.0089	19	0.33631	17.1936	18	0.50983
GCST90199775	15	0.434	0.84087	0.54883-1.2883	0.122	0.77779	0.56568-1.06944	0.122	0.84112	0.67556-1.04725	0.23	0.67652	0.36322-1.26005	0.208	0.81706	0.60123-1.11036	6e-05	0.99875	0.642	22.373	25	0.61413	22.373	24	0.55701
GCST90199776	21	0.569	0.89372	0.60971-1.3100	0.932	0.98365	0.67502-1.43338	0.123	0.82933	0.65366-1.05222	0.717	0.8545	0.36810-1.98362	0.491	1.20546	0.71253-2.03939	-0.01443	0.62515	0.345	32.7676	32	0.42917	32.5122	31	0.39225
GCST90199777	34	0.138	1.96675	0.82680-4.6784	0.139	0.72901	0.47983-1.10759	0.124	0.79439	0.59256-1.06497	0.372	0.67807	0.29270-1.57083	0.193	0.56501	0.24405-1.30807	-0.10414	0.03824	0.844	20.5232	28	0.84465	15.7757	27	0.95709
GCST90199778	17	0.915	1.06127	0.36423-3.0923	0.22	1.38817	0.82179-2.34490	0.124	1.34175	0.92261-1.95131	0.476	1.37443	0.58575-3.22502	0.332	1.45146	0.70110-3.00489	0.02519	0.65223	0.472	14.9381	15	0.45588	14.7152	14	0.39789
GCST90199779	25	0.412	0.82947	0.53763-1.2797	0.157	0.78194	0.55633-1.09906	0.125	0.80417	0.60890-1.06205	0.155	0.56483	0.26718-1.19406	0.177	0.77548	0.54537-1.10269	-0.00664	0.85779	0.908	9.23685	15	0.86481	9.20354	14	0.81779
GCST90199780	26	0.083	0.54754	0.28849-1.0392	0.645	0.8968	0.56449-1.42473	0.125	0.77765	0.56386-1.07251	0.838	0.90803	0.36586-2.25368	0.853	0.92317	0.40098-2.12539	0.05911	0.23162	0.661	15.3921	18	0.63489	13.8531	17	0.67747
GCST90199781	27	0.902	1.04158	0.54604-1.9869	0.96	1.00926	0.70407-1.44675	0.125	1.2567	0.93823-1.68329	0.503	1.31582	0.59521-2.90885	0.629	0.91277	0.63281-1.31658	0.02861	0.52678	0.021	46.6823	30	0.02672	46.0308	29	0.0233
GCST90199782	27	0.442	1.36391	0.62671-2.9683	0.371	1.24183	0.77237-1.99662	0.126	1.27566	0.93360-1.74303	0.345	1.47255	0.67051-3.23397	0.503	1.26307	0.64464-2.47479	-0.00887	0.85555	0.971	13.0158	24	0.96586	12.9819	23	0.95238
GCST90199783	24	0.624	1.29535	0.47111-3.5616	0.466	1.24027	0.69490-2.21366	0.128	1.41947	0.90443-2.22780	0.651	1.26292	0.46928-3.39875	0.613	1.27693	0.50551-3.22556	0.01246	0.84453	0.232	18.752	15	0.22519	18.6987	14	0.17678
GCST90199784	27	0.338	0.82165	0.55518-1.2160	0.336	0.85732	0.62670-1.17279	0.128	0.83771	0.66688-1.05231	0.396	0.77767	0.44022-1.37382	0.174	0.81375	0.61070-1.08429	0.00404	0.90648	0.931	13.1453	21	0.90345	13.1311	20	0.87169
GCST90199785	24	0.177	1.84438	0.77687-4.3788	0.775	1.06727	0.68309-1.66753	0.13	1.31445	0.92279-1.87235	0.758	1.15587	0.46441-2.87686	0.987	0.99323	0.43664-2.25932	-0.04263	0.40723	0.138	35.0135	27	0.13853	34.0832	26	0.13294
GCST90199786	30	0.758	0.92398	0.56228-1.5184	0.345	0.82075	0.54468-1.23674	0.13	0.80997	0.61678-1.06368	0.765	1.12808	0.51692-2.46182	0.452	0.85953	0.58332-1.26654	-0.02454	0.54091	0.602	20.6036	22	0.54534	20.2172	21	0.50754
GCST90199787	27	0.637	1.26854	0.48278-3.3332	0.154	1.50719	0.85747-2.64922	0.131	1.36522	0.91174-2.04424	0.242	1.85873	0.68555-5.03957	0.269	1.7912	0.66203-4.84631	0.00912	0.87206	0.73	11.6807	15	0.70302	11.6538	14	0.63409
GCST90199788	26	0.057	0.38762	0.15607-0.9627	0.275	1.36501	0.78093-2.38596	0.133	1.42125	0.89809-2.24918	0.576	1.33177	0.49641-3.57284	0.561	1.29586	0.55013-3.05249	0.18732	0.00651	0.147	24.8815	18	0.12822	15.2759	17	0.57561
GCST90199789	16	0.42	0.63233	0.21243-1.8822	0.974	0.99108	0.57468-1.70920	0.133	0.71684	0.46441-1.10648	0.966	1.02061	0.39858-2.61342	0.926	1.04895	0.38898-2.82867	0.01374	0.80759	0.158	26.7244	21	0.18016	26.6432	20	0.1456
GCST90199790	25	0.074	2.37241	0.97486-5.7735	0.239	1.37971	0.80712-2.35851	0.133	1.34827	0.91276-1.99158	0.445	1.47385	0.55711-3.89908	0.467	1.47385	0.52942-4.10300	-0.07445	0.18373	0.597	15.8915	18	0.60012	13.9712	17	0.66914
GCST90199791	34	0.557	1.24142	0.60995-2.5267	0.189	1.36702	0.85748-2.17934	0.134	1.29906	0.92263-1.82906	0.533	1.3223	0.55743-3.13668	0.599	1.26834	0.52915-3.04013	0.007	0.88781	0.738	17.7035	22	0.72341	17.6831	21	0.66896
GCST90199792	18	0.233	1.68349	0.73270-3.8681	0.762	1.0787	0.66117-1.75992	0.134	1.3012	0.92216-1.83604	0.886	1.06656	0.44582-2.55157	0.944	1.03141	0.44066-2.41411	-0.02971	0.51223	0.454	21.4505	22	0.49307	21.0059	21	0.45859
GCST90199793	32	0.536	1.34919	0.53249-3.4185	0.134	0.6561	0.37829-1.13794	0.135	0.73878	0.49690-1.09840	0.319	0.5766	0.20132-1.65141	0.311	0.58272	0.21096-1.60957	-0.08015	0.17837	0.692	14.4589	18	0.69873	12.4881	17	0.76972
GCST90199794	29	0.153	0.55351	0.25242-1.2137	0.094	0.6591	0.40448-1.07400	0.135	0.77633	0.55695-1.08211	0.261	1.91121	0.63454-5.75650	0.086	0.5872	0.32758-1.05260	0.04737	0.36076	0.257	28.2143	24	0.2511	27.1865	23	0.24811
GCST90199795	23	0.511	0.70052	0.24924-1.9689	0.328	0.74686	0.41592-1.34113	0.136	0.7193	0.46650-1.10910	0.797	0.87538	0.32316-2.37122	0.827	0.8827	0.29474-2.64354	0.0038	0.95672	0.867	9.35107	15	0.85846	9.34802	14	0.80813
GCST90199796	17	0.969	1.01248	0.54191-1.8917	0.082	1.38138	0.96001-1.98769	0.136	1.22865	0.93694-1.61118	0.266	1.54003	0.73112-3.24389	0.248	1.52531	0.75693-3.07370	0.02934	0.50662	0.583	24.9941	27	0.57479	24.5406	26	0.54508
GCST90199797	22	0.716	1.17486	0.50016-2.7597	0.024	1.88767	1.08861-3.27326	0.137	1.35076	0.90915-2.00687	0.092	2.38011	0.91394-6.19836	0.125	2.28779	0.83252-6.28695	0.01793	0.72025	0.394	20.1728	19	0.38425	20.0256	18	0.33138
GCST90199798	30	0.552	1.25117	0.60351-2.5939	0.209	0.74383	0.46874-1.18034	0.137	0.78375	0.56836-1.08076	0.679	0.82382	0.33194-2.04458	0.626	0.80576	0.34184-1.89928	-0.05541	0.17355	0.502	25.3383	26	0.4999	23.3759	25	0.55562
GCST90199799	32	0.321	0.82203	0.56488-1.1962	0.228	0.79741	0.55198-1.15197	0.138	0.83338	0.65490-1.06051	0.784	0.92004	0.51188-1.65366	0.253	0.80731	0.56632-1.15084	0.00375	0.92665	0.919	10.214	17	0.8944	10.2053	16	0.85569
GCST90199800	26	0.314	0.803	0.52906-1.2188	0.237	0.82482	0.59955-1.13473	0.139	0.83598	0.65917-1.06022	0.339	0.6891	0.32654-1.45424	0.271	0.8209	0.58267-1.15653	0.00742	0.82022	0.861	16.8636	23	0.81589	16.8107	22	0.77372
GCST90199801	17	0.472	1.277	0.66194-2.4635	0.8	0.94601	0.61574-1.45342	0.139	0.7894	0.57718-1.07964	0.89	0.9435	0.41520-2.14403	0.918	1.03285	0.56000-1.90495	-0.06492	0.11611	0.057	42.7286	30	0.0619	39.1837	29	0.0982
GCST90199802	35	0.103	0.46417	0.19684-1.0946	0.161	0.65881	0.36737-1.18144	0.139	0.73785	0.49326-1.10373	0.15	0.4484	0.15983-1.25799	0.158	0.58716	0.29146-1.18284	0.06264	0.25348	0.461	14.3808	14	0.42175	12.953	13	0.45145
GCST90199803	27	0.571	0.81683	0.41008-1.6270	0.507	0.87385	0.58691-1.30109	0.141	0.80678	0.60605-1.07400	0.235	0.60231	0.26672-1.36011	0.627	0.82162	0.37638-1.79354	-0.00206	0.96935	0.454	22.4318	22	0.43438	22.4302	21	0.37509
GCST90199804	27	0.855	0.93271	0.44626-1.9494	0.353	1.21728	0.80368-1.84372	0.143	1.24458	0.92887-1.66760	0.8	1.12017	0.46939-2.67321	0.753	1.13082	0.52963-2.41441	0.03585	0.41165	0.471	24.5315	25	0.48886	23.8333	24	0.47116
GCST90199805	25	0.909	0.96812	0.55803-1.6796	0.586	0.87373	0.53767-1.41982	0.145	0.80805	0.60647-1.07664	0.969	0.98237	0.40825-2.36387	0.752	0.91895	0.54657-1.54503	-0.02579	0.45837	0.71	21.8696	26	0.69581	21.3023	25	0.67564
GCST90199806	18	0.314	1.18008	0.86091-1.6176	0.305	1.12718	0.89660-1.41705	0.145	1.16693	0.94820-1.43612	0.191	1.3455	0.87342-2.07275	0.096	1.19391	0.97692-1.45909	-0.00334	0.92587	0.104	35.8106	24	0.05725	35.7968	23	0.04327
GCST90199807	23	0.305	1.46941	0.71570-3.0169	0.031	1.56172	1.04260-2.33932	0.146	1.23549	0.92895-1.64316	0.249	1.50288	0.76424-2.95543	0.076	1.5513	0.97374-2.47143	-0.026	0.61153	0.772	19.6439	25	0.76525	19.3791	24	0.73148
GCST90199808	21	0.462	0.87069	0.60823-1.2464	0.268	0.8651	0.66937-1.11806	0.146	0.8469	0.67708-1.05931	0.183	0.66067	0.36942-1.18155	0.214	0.82892	0.62439-1.10043	-0.00727	0.84924	0.904	9.82395	15	0.83067	9.78646	14	0.77762
GCST90199809	22	0.915	0.95552	0.41873-2.1804	0.183	0.6935	0.40465-1.18854	0.146	0.75206	0.51231-1.10400	0.381	0.68507	0.30000-1.56438	0.361	0.67913	0.30232-1.52560	-0.0317	0.52902	0.754	14.016	18	0.72805	13.603	17	0.69498
GCST90199810	22	0.1	1.34573	0.96209-1.8823	0.253	1.21652	0.86915-1.70272	0.147	1.19061	0.94054-1.50717	0.623	0.83654	0.41516-1.68564	0.269	1.20808	0.87262-1.67250	-0.02797	0.32813	0.858	13.4301	19	0.81584	12.4197	18	0.82483
GCST90199811	22	0.205	1.82768	0.73904-4.5199	0.901	1.03493	0.60196-1.77932	0.149	1.32968	0.90338-1.95717	0.144	2.3567	0.77547-7.16215	0.482	0.70559	0.27086-1.83811	-0.03413	0.45353	0.341	25.0696	23	0.34671	24.4232	22	0.32544
GCST90199812	20	0.704	0.87821	0.45377-1.6997	0.107	1.46154	0.92088-2.31962	0.149	1.26887	0.91858-1.75273	0.275	1.57188	0.71088-3.47571	0.239	1.58658	0.75074-3.35300	0.05665	0.22355	0.654	20.1793	23	0.63107	18.6107	22	0.66923
GCST90199813	34	0.48	1.1736	0.75714-1.8191	0.588	1.08958	0.79888-1.48605	0.15	1.16959	0.94516-1.44732	0.591	1.14213	0.70666-1.84595	0.58	1.10292	0.78222-1.55510	-0.0006	0.98615	0.791	25.2733	31	0.75536	25.273	30	0.71166
GCST90199814	19	0.122	0.72932	0.49819-1.0677	0.127	0.81058	0.61895-1.06155	0.15	0.84098	0.66419-1.06482	0.797	1.09719	0.54709-2.20042	0.157	0.82256	0.63432-1.06665	0.03547	0.36221	0.326	22.7351	19	0.24921	21.6823	18	0.2464
GCST90199815	37	0.296	0.69046	0.35136-1.3568	0.229	0.7781	0.51714-1.17073	0.151	0.81317	0.61305-1.07861	0.411	0.71389	0.32499-1.56816	0.473	0.75583	0.35674-1.60139	0.02753	0.6067	0.504	19.6122	20	0.48241	19.3334	19	0.43564
GCST90199816	23	0.837	0.88475	0.28084-2.7873	0.409	1.25863	0.72945-2.17171	0.151	1.39171	0.88615-2.18569	0.843	1.11946	0.37276-3.36194	0.885	1.07555	0.40734-2.83991	0.05064	0.41042	0.168	24.6936	19	0.17088	23.7562	18	0.16318
GCST90199817	24	0.248	0.61431	0.27485-1.3730	0.166	0.70368	0.42810-1.15666	0.152	0.74921	0.50485-1.11185	0.435	0.68224	0.26601-1.74976	0.255	0.59201	0.24595-1.42496	0.03449	0.58266	0.18	28.2466	22	0.16765	27.8337	21	0.14493
GCST90199818	24	0.257	0.76863	0.49188-1.2011	0.232	0.81097	0.57506-1.14367	0.153	0.84531	0.67112-1.06473	0.412	0.77696	0.42825-1.40962	0.2	0.7249	0.44780-1.17347	0.01601	0.62913	0.785	25.5704	32	0.78229	25.3325	31	0.75265
GCST90199819	35	0.194	1.50417	0.83037-2.7247	0.959	1.00987	0.69433-1.46881	0.156	1.21607	0.92809-1.59340	0.583	0.79313	0.35170-1.78858	0.594	0.81886	0.39700-1.68899	-0.04467	0.43951	0.402	20.9569	20	0.39967	20.2911	19	0.37726
GCST90199820	25	0.026	2.52163	1.20757-5.2656	0.145	1.34964	0.90199-2.01946	0.157	1.23475	0.92208-1.65345	0.348	1.42851	0.69301-2.94459	0.231	1.52868	0.78422-2.97982	-0.12188	0.05607	0.778	11.5003	16	0.77761	7.21316	15	0.95146
GCST90199821	21	0.279	1.6143	0.69723-3.7376	0.152	1.44228	0.87434-2.37914	0.158	1.30681	0.90100-1.89542	0.396	1.50652	0.59761-3.79782	0.38	1.50652	0.61703-3.67826	-0.02674	0.58931	0.814	12.2094	18	0.83624	11.9067	17	0.80576
GCST90199822	33	0.612	1.27234	0.51027-3.1725	0.693	1.10846	0.66490-1.84791	0.158	1.3076	0.90144-1.89677	0.918	1.04951	0.42240-2.60762	0.97	1.01539	0.45708-2.25563	0.00321	0.94955	0.853	12.2455	18	0.83431	12.2413	17	0.78531
GCST90199823	21	0.029	0.30622	0.11539-0.8127	0.884	0.95996	0.55563-1.65852	0.158	0.74079	0.48842-1.12354	0.93	1.05068	0.35596-3.10122	0.607	1.22168	0.57729-2.58538	0.15448	0.07002	0.168	23.8047	18	0.16153	19.514	17	0.29984
GCST90199824	25	0.16	0.54662	0.24344-1.2274	0.398	1.24153	0.75198-2.04977	0.159	1.34235	0.89067-2.02311	0.45	1.46027	0.55733-3.82607	0.549	1.35151	0.51267-3.56285	0.11434	0.0245	0.05	31.3658	20	0.05054	23.868	19	0.20126
GCST90199825	22	0.941	0.96093	0.33869-2.7263	0.458	0.81647	0.47810-1.39430	0.159	1.39773	0.87717-2.22722	0.119	3.12779	0.79201-12.35214	0.416	0.76583	0.40775-1.43838	0.0522	0.43936	0.007	41.4615	21	0.00491	40.2099	20	0.0047
GCST90199826	17	0.67	1.06031	0.81212-1.3843	0.525	1.06422	0.87836-1.28942	0.159	1.12583	0.95476-1.32753	0.721	1.13013	0.58193-2.19476	0.532	1.06549	0.87552-1.29667	0.02292	0.5799	0.588	24.861	27	0.58225	24.5468	26	0.54473
GCST90199827	19	0.065	0.37221	0.14600-0.9489	0.244	0.67654	0.35036-1.30641	0.16	0.69703	0.42143-1.15284	0.53	1.5061	0.43715-5.18900	0.555	1.44108	0.44411-4.67617	0.10783	0.15711	0.373	12.1312	11	0.35386	9.79152	10	0.45897
GCST90199828	24	0.247	1.57753	0.74595-3.3361	0.535	1.16334	0.72109-1.87684	0.161	1.29414	0.90238-1.85599	0.659	1.2359	0.48902-3.12350	0.667	1.2359	0.47707-3.20175	-0.02461	0.56099	0.867	14.3135	21	0.85576	13.964	20	0.83232
GCST90199829	17	0.165	1.91166	0.78901-4.6317	0.657	1.10088	0.72021-1.68277	0.162	0.81133	0.60517-1.08773	0.615	1.2132	0.57739-2.54916	0.606	1.15122	0.67866-1.95283	-0.10985	0.05678	0.455	23.2232	23	0.4478	19.1806	22	0.63415
GCST90199830	20	0.157	0.47261	0.17191-1.2993	0.533	0.86452	0.54717-1.36592	0.162	0.76556	0.52648-1.11320	0.97	1.01954	0.37747-2.75377	0.894	1.06514	0.42517-2.66837	0.0567	0.32291	0.044	43.8227	29	0.03815	42.2933	28	0.04068
GCST90199831	27	0.065	0.70064	0.48819-1.0055	0.115	0.80213	0.60962-1.05541	0.163	0.86689	0.70938-1.05938	0.329	0.77553	0.47004-1.27957	0.135	0.79547	0.59467-1.06409	0.04205	0.17669	0.922	17.8649	27	0.90759	15.9363	26	0.93772
GCST90199832	20	0.727	0.86952	0.40182-1.8816	0.431	1.16473	0.79707-1.70198	0.164	1.21825	0.92281-1.60828	0.935	1.03114	0.50084-2.12294	0.947	1.02386	0.51463-2.03698	0.04725	0.37091	0.867	12.4907	19	0.8636	11.6485	18	0.86484
GCST90199833	26	0.916	1.04923	0.43572-2.5266	0.353	0.82236	0.54425-1.24258	0.165	0.80716	0.59659-1.09205	0.74	1.12327	0.57245-2.20410	0.467	0.81735	0.48049-1.39036	-0.03549	0.54207	0.939	9.16308	17	0.93501	8.77497	16	0.92239
GCST90199834	17	0.909	1.05609	0.41898-2.6620	0.114	1.43675	0.91633-2.25273	0.165	1.29608	0.89896-1.86864	0.356	1.63534	0.58596-4.56405	0.334	1.63534	0.61375-4.35740	0.02307	0.63956	0.063	36.1828	26	0.08836	35.8604	25	0.07374
GCST90199835	29	0.066	1.96076	1.00174-3.8379	0.199	1.30164	0.87056-1.94618	0.166	1.23626	0.91563-1.66916	0.276	1.49301	0.74209-3.00378	0.243	1.50438	0.77536-2.91882	-0.09481	0.15072	0.738	13.5508	18	0.75787	11.2863	17	0.8413
GCST90199836	21	0.512	0.7273	0.28615-1.8486	0.488	1.19674	0.72016-1.98871	0.166	1.29363	0.89863-1.86225	0.732	1.19712	0.43446-3.29860	0.704	1.19712	0.47908-2.99135	0.06163	0.20437	0.56	18.26	20	0.57028	16.5325	19	0.62151
GCST90199837	28	0.731	0.92186	0.58450-1.4539	0.682	0.94139	0.70520-1.25669	0.166	1.21172	0.92342-1.59003	0.399	1.34744	0.68459-2.65209	0.694	0.94158	0.70093-1.26487	0.05242	0.16728	0.108	27.0989	18	0.07716	24.143	17	0.1156
GCST90199838	32	0.193	1.64776	0.78957-3.4387	0.142	1.37453	0.89935-2.10077	0.167	1.23241	0.91645-1.65730	0.464	0.66973	0.23199-1.93345	0.118	1.86908	0.87150-4.00857	-0.03277	0.4038	0.326	36.091	33	0.32608	35.3014	32	0.31489
GCST90199839	39	0.091	0.55122	0.28252-1.0755	0.638	0.88989	0.54738-1.44672	0.171	0.81761	0.61264-1.09114	0.529	1.36517	0.52378-3.55814	0.965	0.98659	0.54373-1.79016	0.04357	0.20968	0.506	32.1502	32	0.45931	30.5091	31	0.49113
GCST90199840	33	0.149	2.44466	0.77549-7.7065	0.625	1.14263	0.66947-1.95022	0.172	1.32907	0.88324-1.99994	0.992	1.00537	0.36064-2.80270	0.961	0.97729	0.39137-2.44037	-0.08309	0.28436	0.756	11.0277	15	0.75063	9.78844	14	0.77748
GCST90199841	35	0.151	0.59214	0.29622-1.1837	0.08	0.68809	0.45291-1.04539	0.173	0.80613	0.59132-1.09897	0.253	0.60624	0.26214-1.40202	0.265	0.66835	0.33450-1.33540	0.04311	0.33866	0.21	30.0735	25	0.22155	28.9247	24	0.22298
GCST90199842	31	0.834	0.94059	0.53451-1.6552	0.069	0.72715	0.51556-1.02558	0.173	0.8234	0.62258-1.08899	0.405	1.34133	0.68056-2.64365	0.196	0.78423	0.54807-1.12214	-0.02652	0.59867	0.123	32.9567	24	0.10499	32.5536	23	0.08917
GCST90199843	14	0.885	1.06327	0.46589-2.4266	0.233	0.75276	0.47178-1.20106	0.175	0.79842	0.57659-1.10558	0.221	0.57229	0.23908-1.36991	0.218	0.56536	0.23324-1.37043	-0.03385	0.46588	0.67	22.6548	26	0.65239	22.1064	25	0.62959
GCST90199844	25	0.319	0.70889	0.36502-1.3767	0.724	0.93305	0.63497-1.37107	0.176	0.82111	0.61734-1.09215	0.772	1.11061	0.54973-2.24376	0.753	1.12093	0.55387-2.26855	0.02134	0.63481	0.759	21.5368	27	0.76053	21.3058	26	0.72601
GCST90199845	19	0.755	0.85833	0.33290-2.2131	0.573	1.16388	0.68629-1.97385	0.176	1.29444	0.89048-1.88167	0.452	0.67277	0.24448-1.85136	0.476	0.68078	0.24111-1.92218	0.05084	0.36605	0.402	21.1636	20	0.38756	20.2496	19	0.3797
GCST90199846	33	0.515	1.32417	0.57872-3.0299	0.7	1.08336	0.72086-1.62814	0.176	1.27887	0.89521-1.82697	0.952	1.0248	0.46344-2.26612	0.994	1.00314	0.46383-2.16955	-0.00612	0.92778	0.062	30.4579	19	0.04625	30.4436	18	0.03335
GCST90199847	26	0.817	0.90394	0.38691-2.1119	0.761	0.9344	0.60374-1.44615	0.177	0.78575	0.55379-1.11488	1	1.00008	0.43166-2.31703	0.908	1.04941	0.46845-2.35090	-0.01892	0.72444	0.052	38.5759	26	0.05349	38.3807	25	0.04245
GCST90199848	29	0.167	0.5604	0.25704-1.2218	0.657	0.88883	0.52814-1.49584	0.177	0.76868	0.52483-1.12581	0.939	1.04079	0.38278-2.82990	0.949	1.03277	0.39309-2.71343	0.05731	0.37753	0.901	8.83836	15	0.88582	8.00777	14	0.88892
GCST90199849	38	0.672	1.20529	0.51423-2.8250	0.481	1.18128	0.74349-1.87684	0.178	1.27088	0.89689-1.80080	0.365	1.52729	0.62389-3.73882	0.298	1.52729	0.70265-3.31975	0.00705	0.89456	0.319	22.2861	20	0.32519	22.265	19	0.27127
GCST90199850	28	0.244	1.5627	0.74988-3.2566	0.388	1.21133	0.78411-1.87134	0.179	1.2412	0.90539-1.70155	0.703	1.20348	0.46920-3.08690	0.856	0.93234	0.44062-1.97278	-0.02834	0.50098	0.298	30.0237	27	0.31309	29.4954	26	0.28904
GCST90199851	36	0.718	0.81557	0.27504-2.4184	0.645	1.12686	0.67825-1.87218	0.179	1.28036	0.89287-1.83599	0.937	0.96543	0.40600-2.29572	0.875	1.06465	0.49331-2.29768	0.05293	0.40141	0.627	15.1333	17	0.58588	14.3902	16	0.56967
GCST90199852	23	0.7	0.85213	0.38462-1.8879	0.109	0.73114	0.49842-1.07252	0.18	0.74234	0.48036-1.14719	0.929	1.04244	0.42503-2.55674	0.194	0.75031	0.49645-1.13398	-0.02037	0.68733	0.058	28.2924	14	0.01301	27.9284	13	0.00926
GCST90199853	28	0.302	0.67269	0.32462-1.3940	0.127	0.71175	0.45994-1.10142	0.18	0.77787	0.53881-1.12298	0.2	0.61192	0.29705-1.26054	0.104	0.67499	0.43113-1.05677	0.02188	0.65435	0.168	24.6811	17	0.10208	24.3641	16	0.08185
GCST90199854	30	0.373	0.73389	0.37553-1.4342	0.785	0.94885	0.65046-1.38412	0.18	0.82922	0.63059-1.09042	0.676	1.18378	0.54095-2.59049	0.57	1.22743	0.60997-2.46992	0.01905	0.69854	0.867	20.1245	28	0.85988	19.9713	27	0.83196
GCST90199855	30	0.916	1.04939	0.43303-2.5430	0.286	0.73899	0.42389-1.28831	0.183	0.76534	0.51650-1.13406	0.677	0.80629	0.29704-2.18858	0.614	0.77276	0.28802-2.07332	-0.03847	0.44382	0.369	21.3658	20	0.37589	20.6995	19	0.35364
GCST90199856	28	0.722	1.12932	0.58459-2.1816	0.309	0.81471	0.54907-1.20886	0.183	0.82213	0.61640-1.09653	0.664	0.85161	0.41839-1.73340	0.594	0.83416	0.43364-1.60461	-0.06301	0.31032	0.405	16.5141	16	0.41769	15.3833	15	0.42417
GCST90199857	23	0.834	0.89204	0.31528-2.5239	0.817	0.92532	0.47907-1.78721	0.185	0.72255	0.44675-1.16860	0.851	0.88703	0.26130-3.01119	0.943	1.03831	0.38053-2.83315	-0.03494	0.66406	0.532	9.37346	10	0.49707	9.16811	9	0.4219
GCST90199858	22	0.942	0.96193	0.34399-2.6899	0.167	0.71366	0.44222-1.15171	0.185	0.76052	0.50717-1.14045	0.358	0.62779	0.23768-1.65818	0.312	0.62779	0.26005-1.51554	-0.0305	0.63005	0.083	33.0318	22	0.06143	32.6602	21	0.05012
GCST90199859	28	0.074	0.43824	0.18362-1.0459	0.152	0.69987	0.42962-1.14012	0.186	0.77345	0.52865-1.13160	0.381	0.64403	0.24448-1.69658	0.442	0.64403	0.21312-1.94625	0.0697	0.16775	0.039	42.0819	28	0.04259	39.1668	27	0.06118
GCST90199860	39	0.767	1.12576	0.51923-2.4408	0.447	1.19577	0.75445-1.89524	0.188	1.24644	0.89761-1.73082	0.715	1.19519	0.46366-3.08086	0.726	1.17529	0.48089-2.87239	0.0115	0.77823	0.917	15.8989	25	0.91781	15.8178	24	0.89454
GCST90199861	33	0.969	0.99142	0.64181-1.5315	0.672	0.93613	0.68975-1.27050	0.189	0.86043	0.68742-1.07698	0.467	0.77259	0.38890-1.53480	0.641	0.92854	0.68205-1.26412	-0.02361	0.46027	0.173	39.8006	32	0.16173	39.0955	31	0.15073
GCST90199862	22	0.909	1.0432	0.51096-2.1299	0.321	0.83875	0.59259-1.18718	0.19	0.84268	0.65245-1.08837	0.853	0.93602	0.46773-1.87318	0.886	0.95384	0.50390-1.80556	-0.04178	0.53548	0.372	25.926	24	0.35693	25.4874	23	0.32565
GCST90199863	24	0.024	0.44969	0.23308-0.8676	0.492	0.8716	0.58870-1.29047	0.19	0.81875	0.60720-1.10399	0.86	1.08402	0.44653-2.63164	0.661	0.78423	0.26738-2.30012	0.0833	0.05642	0.053	42.0859	31	0.08839	37.2026	30	0.17131
GCST90199864	34	0.395	1.52954	0.58865-3.9744	0.257	1.32327	0.81542-2.14741	0.191	1.27868	0.88428-1.84900	0.4	1.46141	0.61668-3.46326	0.379	1.47354	0.63500-3.41936	-0.02396	0.69513	0.97	8.4381	18	0.97138	8.27919	17	0.96021
GCST90199865	29	0.226	1.73325	0.73169-4.1058	0.63	1.13173	0.68418-1.87202	0.191	1.27446	0.88574-1.83379	0.956	1.02935	0.36994-2.86414	0.927	1.0509	0.36785-3.00233	-0.03396	0.44986	0.549	19.7784	21	0.53533	19.1843	20	0.50988
GCST90199866	25	0.314	0.62365	0.25870-1.5034	0.239	0.77407	0.50532-1.18576	0.192	0.80274	0.57721-1.11637	0.357	0.69278	0.32602-1.47217	0.33	0.70302	0.35534-1.39089	0.04078	0.55546	0.779	9.1382	13	0.76243	8.77032	12	0.72241
GCST90199867	24	0.513	1.09338	0.84094-1.4216	0.396	1.10477	0.87762-1.39071	0.192	1.12281	0.94353-1.33617	0.108	1.46989	0.93806-2.30323	0.132	1.16985	0.96124-1.42374	0.00906	0.79381	0.806	15.6645	21	0.78819	15.5944	20	0.74145
GCST90199868	24	0.727	1.09826	0.65289-1.8474	0.196	0.77881	0.53300-1.13799	0.193	0.85125	0.66788-1.08497	0.161	0.60589	0.30630-1.19852	0.142	0.70676	0.45101-1.10752	-0.04194	0.28766	0.519	26.3071	27	0.50161	25.1288	26	0.51169
GCST90199869	18	0.471	1.21009	0.72665-2.0152	0.971	0.99197	0.64039-1.53657	0.194	1.20856	0.90831-1.60807	0.966	0.98419	0.47594-2.03521	0.974	0.99285	0.64391-1.53090	-0.00018	0.99537	0.708	19.3715	23	0.67947	19.3714	22	0.62229
GCST90199870	25	0.319	0.58328	0.21213-1.6038	0.172	0.67866	0.38907-1.18382	0.194	0.7646	0.50981-1.14672	0.187	0.44645	0.14432-1.38111	0.495	1.50163	0.48431-4.65587	0.03551	0.57849	0.572	10.4355	12	0.57781	10.1078	11	0.52072
GCST90199871	28	0.321	1.50851	0.68565-3.3189	0.637	0.89492	0.56447-1.41881	0.195	0.80382	0.57788-1.11810	0.412	0.69835	0.30237-1.61289	0.769	0.92094	0.53612-1.58197	-0.08368	0.10304	0.879	11.3101	18	0.88074	8.34167	17	0.95868
GCST90199872	33	0.238	1.23531	0.87693-1.7401	0.132	1.28078	0.92801-1.76766	0.197	1.16293	0.92450-1.46286	0.997	1.00159	0.48375-2.07376	0.184	1.26924	0.90122-1.78754	-0.0146	0.6458	0.838	20.1039	27	0.82637	19.8876	26	0.79685
GCST90199873	36	0.011	0.26848	0.10863-0.6635	0.577	0.85807	0.50088-1.46999	0.197	0.772	0.52114-1.14362	0.767	0.86333	0.33073-2.25366	0.749	0.85377	0.32895-2.21592	0.12091	0.02114	0.683	14.7161	18	0.68136	8.26421	17	0.96057
GCST90199874	21	0.841	0.92047	0.41357-2.0486	0.321	0.78381	0.48443-1.26822	0.198	0.80971	0.58722-1.11649	0.786	0.89458	0.40470-1.97742	0.447	0.80706	0.46985-1.38631	-0.01924	0.73559	0.534	17.861	19	0.53174	17.7434	18	0.47267
GCST90199875	17	0.341	0.70107	0.34294-1.4332	0.582	0.88719	0.57943-1.35842	0.198	0.80915	0.58597-1.11732	0.168	0.57405	0.26747-1.23205	0.487	0.85467	0.55298-1.32095	0.02101	0.6625	0.106	32.7611	23	0.08532	32.4722	22	0.06969
GCST90199876	32	0.294	1.3419	0.78410-2.2965	0.163	1.31801	0.89403-1.94306	0.199	1.1878	0.91329-1.54482	0.893	0.95045	0.45599-1.98109	0.324	1.2481	0.81060-1.92175	-0.01634	0.61479	0.726	18.8617	24	0.75932	18.6014	23	0.7241
GCST90199877	13	0.276	0.82031	0.57868-1.1628	0.272	0.85931	0.65557-1.12636	0.201	0.87709	0.71736-1.07239	0.716	0.8996	0.51188-1.58100	0.211	0.84989	0.66275-1.08988	0.01427	0.64954	0.586	24.902	26	0.52453	24.6905	25	0.47982
GCST90199878	33	0.904	0.95339	0.44223-2.0554	0.558	0.86828	0.54147-1.39234	0.201	0.80782	0.58263-1.12006	0.986	1.00765	0.44509-2.28122	0.758	0.90581	0.48612-1.68787	-0.02707	0.64522	0.7	18.558	22	0.67244	18.3398	21	0.62741
GCST90199879	24	0.315	1.43898	0.72012-2.8754	0.973	1.00809	0.62680-1.62132	0.203	1.2453	0.88867-1.74505	0.833	0.9056	0.36421-2.25180	0.783	0.87962	0.35737-2.16507	-0.02138	0.64409	0.583	19.9954	22	0.58333	19.7757	21	0.5355
GCST90199880	27	0.345	1.47456	0.67273-3.2321	0.263	1.33013	0.80676-2.19302	0.205	1.26429	0.87957-1.81729	0.302	1.65929	0.65052-4.23236	0.329	1.58455	0.64336-3.90267	-0.02921	0.66992	0.669	15.5193	19	0.68907	15.3315	18	0.63909
GCST90199881	13	0.785	0.9185	0.50115-1.6834	0.655	0.92544	0.65906-1.29947	0.206	0.82735	0.61670-1.10997	0.484	0.75098	0.33970-1.66020	0.602	0.9158	0.66013-1.27050	-0.01454	0.70042	0.001	61.892	33	0.00169	61.6019	32	0.00127
GCST90199882	27	0.581	1.37666	0.45230-4.1901	0.119	1.5997	0.88642-2.88694	0.208	1.35122	0.84615-2.15774	0.369	1.67635	0.55871-5.02967	0.339	1.6546	0.60561-4.52059	-0.00215	0.97136	0.113	25.1818	18	0.11999	25.1798	17	0.09076
GCST90199883	18	0.63	1.22614	0.54344-2.7665	0.304	1.32041	0.77723-2.24319	0.209	1.28189	0.87036-1.88801	0.549	1.34342	0.52171-3.45937	0.535	1.31451	0.56467-3.06007	0.00598	0.90442	0.531	15.3094	16	0.50211	15.2942	15	0.43044
GCST90199884	27	0.251	0.70484	0.39265-1.2653	0.223	0.78176	0.52616-1.16152	0.213	0.83514	0.62884-1.10912	0.493	0.75894	0.34821-1.65416	0.211	0.66427	0.35458-1.24444	0.02237	0.5208	0.866	22.7404	31	0.8584	22.3182	30	0.84222
GCST90199885	20	0.94	1.03852	0.39447-2.7341	0.426	0.784	0.43038-1.42815	0.213	0.76158	0.49605-1.16927	0.206	0.46768	0.15217-1.43740	0.303	0.58963	0.22395-1.55242	-0.04492	0.49407	0.396	14.9199	14	0.38365	14.3725	13	0.34814
GCST90199886	21	0.036	2.92045	1.15768-7.3674	0.995	1.00153	0.60480-1.65849	0.213	1.28988	0.86431-1.92499	0.112	2.47758	0.85376-7.18986	0.843	0.94155	0.52358-1.69319	-0.13987	0.07553	0.056	28.9201	18	0.04936	23.886	17	0.12257
GCST90199887	19	0.454	1.37001	0.60937-3.0801	0.849	1.05064	0.63200-1.74657	0.213	1.25062	0.87965-1.77804	0.805	0.88305	0.33183-2.34994	0.736	0.8506	0.33580-2.15461	-0.01086	0.80872	0.597	21.6687	24	0.59903	21.6087	23	0.54396
GCST90199888	31	0.781	0.93977	0.60996-1.4479	0.879	1.02465	0.74828-1.40308	0.214	1.1688	0.91377-1.49500	0.926	1.0364	0.49170-2.18453	0.952	0.99036	0.72675-1.34959	0.05049	0.24371	0.852	11.4605	20	0.9334	10.013	19	0.95262
GCST90199889	32	0.73	0.86098	0.37430-1.9805	0.134	0.72149	0.47100-1.10522	0.214	0.78172	0.53031-1.15230	0.309	0.6036	0.23549-1.54709	0.115	0.69819	0.45786-1.06467	-0.017	0.79914	0.088	26.1884	16	0.05143	26.0718	15	0.03727
GCST90199890	27	0.149	0.53997	0.23974-1.2162	0.16	0.7242	0.46156-1.13628	0.215	0.80245	0.56657-1.13653	0.734	0.87455	0.40681-1.88009	0.382	0.76106	0.41718-1.38841	0.05953	0.30019	0.097	36.1947	26	0.08815	34.6437	25	0.09485
GCST90199891	22	0.613	0.8069	0.35748-1.8213	0.906	1.03132	0.61688-1.72419	0.215	1.27112	0.86986-1.85748	0.981	0.98825	0.37624-2.59580	0.907	0.94612	0.37843-2.36540	0.06039	0.2341	0.852	11.1738	17	0.84739	9.64475	16	0.88451
GCST90199892	19	0.121	2.00379	0.86052-4.6660	0.378	1.24463	0.76532-2.02413	0.215	1.2724	0.86949-1.86202	0.724	1.17536	0.48417-2.85327	0.715	1.17536	0.49931-2.76676	-0.05823	0.25176	0.229	28.2588	23	0.20615	26.5847	22	0.22742
GCST90199893	21	0.602	1.54087	0.31912-7.4402	0.351	1.36377	0.71062-2.61723	0.216	1.36403	0.83406-2.23074	0.367	1.71347	0.55740-5.26731	0.671	1.27033	0.43379-3.72013	-0.01441	0.87561	0.4	11.9029	11	0.37099	11.8722	10	0.2937
GCST90199894	16	0.685	0.90777	0.57273-1.4388	0.411	0.86589	0.61445-1.22023	0.216	0.854	0.66513-1.09650	0.308	0.72327	0.39404-1.32760	0.258	0.82202	0.59069-1.14395	-0.01056	0.76027	0.771	16.8612	21	0.71949	16.7655	20	0.66814
GCST90199895	15	0.902	0.93544	0.32743-2.6725	0.822	1.06305	0.62365-1.81203	0.216	0.78501	0.53479-1.15228	0.559	1.37202	0.48327-3.89523	0.556	1.36021	0.49735-3.72005	-0.0206	0.72893	0.87	13.4832	20	0.8557	13.3595	19	0.81967
GCST90199896	30	0.042	0.37598	0.15886-0.8899	0.322	0.76827	0.45582-1.29488	0.217	0.78482	0.53431-1.15279	0.743	0.83914	0.29968-2.34973	0.761	0.85401	0.31381-2.32412	0.09212	0.081	0.764	11.9064	16	0.7504	8.40614	15	0.90647
GCST90199897	28	0.129	1.5837	0.89638-2.7980	0.314	1.25861	0.80454-1.96897	0.218	1.22316	0.88758-1.68561	0.777	1.11218	0.53753-2.30116	0.385	1.23206	0.77662-1.95459	-0.04505	0.29518	0.325	24.3093	21	0.27832	22.9814	20	0.28971
GCST90199898	25	0.296	0.55959	0.19328-1.6202	0.57	0.87236	0.54462-1.39732	0.219	0.78775	0.53871-1.15193	0.668	0.84078	0.38400-1.84089	0.644	0.83016	0.38073-1.81013	0.03671	0.50562	0.055	34.8835	24	0.07015	34.2034	23	0.06227
GCST90199899	25	0.131	0.46525	0.17934-1.2069	0.932	1.02233	0.61539-1.69839	0.219	1.29856	0.85609-1.96970	0.813	1.11925	0.44603-2.80864	0.861	0.94601	0.51133-1.75023	0.12831	0.03165	0.032	35.8298	22	0.03167	28.6084	21	0.12373
GCST90199900	26	0.075	4.04398	0.99329-16.4642	0.185	1.51346	0.81958-2.79480	0.219	1.3372	0.84145-2.12503	0.323	1.73779	0.60491-4.99237	0.344	1.67538	0.59754-4.69736	-0.10555	0.12766	0.86	7.97877	13	0.84498	5.30038	12	0.94719
GCST90199901	29	0.882	1.08074	0.39342-2.9688	0.84	0.9502	0.57910-1.55911	0.219	0.80476	0.56933-1.13755	0.882	1.06899	0.44849-2.54793	0.712	1.15958	0.53464-2.51499	-0.0387	0.54981	0.411	18.0943	18	0.44945	17.7065	17	0.40758
GCST90199902	18	0.997	0.99825	0.40268-2.4746	0.506	1.16146	0.74720-1.80538	0.221	1.26658	0.86784-1.84853	0.75	0.86787	0.36599-2.05798	0.812	0.90517	0.40167-2.03983	0.02914	0.57581	0.066	37.5157	26	0.06712	37.0395	25	0.05724
GCST90199903	22	0.253	1.58026	0.73805-3.3835	0.556	1.14281	0.73264-1.78260	0.222	1.21658	0.88820-1.66635	0.905	1.0477	0.49106-2.23533	0.503	1.25956	0.64882-2.44519	-0.0403	0.46824	0.87	14.0476	21	0.86755	13.5009	20	0.85487
GCST90199904	25	0.325	1.54473	0.66244-3.6021	0.261	0.78348	0.51192-1.19909	0.223	0.80958	0.57647-1.13695	0.324	0.66987	0.30724-1.46049	0.415	0.7696	0.41428-1.42966	-0.08698	0.11825	0.181	30.9938	24	0.15396	27.8095	23	0.22307
GCST90199905	24	0.081	2.0226	0.95512-4.2831	0.685	1.10452	0.68294-1.78634	0.223	1.23172	0.88087-1.72230	0.291	1.69373	0.65396-4.38668	0.926	0.97073	0.52213-1.80473	-0.06891	0.16386	0.556	19.3148	20	0.50145	17.2175	19	0.57514
GCST90199906	23	0.684	1.21408	0.48506-3.0388	0.981	0.9934	0.58181-1.69615	0.224	1.27971	0.86014-1.90394	0.927	0.95365	0.35130-2.58879	0.891	0.93505	0.36204-2.41497	0.00614	0.90236	0.695	12.7641	16	0.68992	12.7485	15	0.62172
GCST90199907	21	0.973	1.0175	0.38366-2.6985	0.707	1.1027	0.66239-1.83569	0.224	1.23885	0.87710-1.74980	0.141	2.09485	0.81382-5.39234	0.78	1.12361	0.50202-2.51487	0.02634	0.67709	0.627	17.7266	20	0.60542	17.5477	19	0.55282
GCST90199908	28	0.433	0.8814	0.64542-1.2037	0.86	0.97245	0.71216-1.32788	0.224	1.13893	0.92349-1.40464	0.063	1.88309	0.98855-3.58707	0.645	0.94294	0.73605-1.20797	0.05687	0.04463	0.168	37.037	31	0.21029	32.3066	30	0.35341
GCST90199909	15	0.746	1.13662	0.52966-2.4391	0.243	1.35967	0.81144-2.27831	0.224	1.26349	0.86679-1.84174	0.55	1.33071	0.53068-3.33682	0.345	1.52218	0.65147-3.55662	0.01565	0.75848	0.501	17.1565	18	0.51237	17.0585	17	0.45041
GCST90199910	23	0.221	1.6032	0.76829-3.3454	0.056	0.65338	0.42190-1.01186	0.225	0.82441	0.60347-1.12625	0.236	0.56276	0.22270-1.42214	0.192	0.56276	0.24304-1.30311	-0.07753	0.0621	0.748	19.7278	25	0.76095	15.8986	24	0.8917
GCST90199911	25	0.623	0.81251	0.36011-1.8333	0.468	1.20289	0.73057-1.98056	0.225	1.26312	0.86624-1.84183	0.534	1.32903	0.55107-3.20527	0.531	1.36266	0.52724-3.52178	0.05343	0.24594	0.96	9.46769	19	0.96488	8.02922	18	0.9782
GCST90199912	20	0.903	1.04784	0.49947-2.1983	0.367	0.80543	0.50319-1.28922	0.227	0.81839	0.59137-1.13257	0.336	1.6618	0.60457-4.56784	0.33	1.6618	0.61231-4.51006	-0.03362	0.47499	0.558	20.5075	22	0.55133	19.9783	21	0.52264
GCST90199913	26	0.843	0.94451	0.53941-1.6538	0.822	0.95355	0.63064-1.44180	0.227	0.83973	0.63245-1.11494	0.396	0.66444	0.26173-1.68682	0.454	1.39576	0.58854-3.31011	-0.01752	0.63515	0.347	36.5337	34	0.35182	36.2816	33	0.31818
GCST90199914	29	0.751	0.90106	0.47690-1.7025	0.083	1.4229	0.95470-2.12070	0.228	1.18511	0.89924-1.56184	0.187	1.77444	0.77264-4.07515	0.239	1.75582	0.70114-4.39696	0.03539	0.35683	0.476	28.2023	29	0.50712	27.3245	28	0.50063
GCST90199915	25	0.551	1.63822	0.33657-7.9739	0.92	0.97051	0.54162-1.73901	0.231	1.3893	0.81140-2.37882	0.882	0.92457	0.33277-2.56884	0.579	0.78975	0.34970-1.78358	-0.02106	0.83057	0.03	27.3158	15	0.02627	27.2234	14	0.01801
GCST90199916	29	0.883	0.92592	0.33674-2.5460	0.332	1.32771	0.74841-2.35543	0.231	1.26537	0.86064-1.86043	0.973	0.98314	0.37475-2.57922	0.363	1.41647	0.68388-2.93383	0.03761	0.52263	0.683	13.2727	16	0.65272	12.8442	15	0.61433
GCST90199917	35	0.444	1.81705	0.41059-8.0413	0.649	1.15703	0.61729-2.16867	0.232	1.39214	0.80883-2.39611	0.426	1.66632	0.48997-5.66693	0.4	1.68981	0.51512-5.54331	-0.03366	0.71023	0.098	23.5957	16	0.09871	23.3723	15	0.07655
GCST90199918	22	0.345	1.37569	0.72041-2.6270	0.562	1.13779	0.73577-1.75947	0.234	1.18593	0.89560-1.57037	0.909	0.95507	0.43726-2.08609	0.491	1.20285	0.71757-2.01633	-0.02781	0.62283	0.656	18.6523	22	0.66669	18.4031	21	0.62337
GCST90199919	19	0.302	0.75427	0.44540-1.2773	0.619	0.89057	0.56422-1.40567	0.234	0.84552	0.64125-1.11487	0.589	0.80316	0.36586-1.76315	0.602	0.8621	0.49662-1.49656	0.01705	0.61959	0.484	31.3244	31	0.44995	31.0639	30	0.41227
GCST90199920	14	0.351	0.69806	0.33370-1.4603	0.561	0.86051	0.51833-1.42859	0.235	0.79309	0.54077-1.16314	0.159	0.45045	0.15426-1.31537	0.176	0.4742	0.16687-1.34753	0.022	0.6937	0.184	27.0186	21	0.17024	26.8046	20	0.14085
GCST90199921	12	0.793	1.08744	0.58538-2.0201	0.583	1.12425	0.74044-1.70701	0.235	1.19687	0.88977-1.60998	0.477	1.3436	0.60105-3.00354	0.697	1.12315	0.62879-2.00619	0.01409	0.7309	0.103	41.8029	31	0.09319	41.6357	30	0.07687
[truncated: 1,051 more rows]
