# Supplementary material
Source: Frontiers journal article supplement (https://www.frontiersin.org/articles/1413183)
Supplement: Table_6.xlsx [file Table_6.xlsx]

## Sheet: Table of Contents
Table of Contents
S6.1. The IVs SNPs involved in peripheral blood metabolites phenotypes to abdominal aortic aneuryme (AAA) of FinnGen database.
S6.2. The single SNP's effect estimated in peripheral blood metabolites phenotypes to AAA of FinnGen database.
S6.3. The IVs SNPs involved in peripheral blood metabolites phenotypes to abdominal aortic aneuryme (AAA) of UKB database.
S6.4. The single SNP's effect estimated in peripheral blood metabolites phenotypes to AAA of UKB database.

## Sheet: S6.1
The IVs SNPs involved in peripheral blood metabolites phenotypes to abdominal aortic aneuryme (AAA) of FinnGen database.
id	SNP	effect_allele.exposure	other_allele.exposure	effect_allele.outcome	other_allele.outcome	beta.exposure	beta.outcome	eaf.exposure	eaf.outcome	remove	palindromic	ambiguous	id.outcome	pos.outcome	pval.outcome	se.outcome	mr_keep.outcome	pval_origin.outcome	data_source.outcome	se.exposure	pval.exposure	mr_keep.exposure	pval_origin.exposure	data_source.exposure	samplesize.exposure	mr_keep	R2	f	meanf
GCST90199621	rs10006723	T	G	T	G	0.170956	-0.073773	0.052858	0.954707	FALSE	FALSE	FALSE	GVY4Ce	101752577	0.186368	0.0558294	TRUE	reported	textfile	0.0345341	7.40711e-07	TRUE	reported	textfile	8192	TRUE	0.00298253	24.5	48.6362
	rs10826332	A	T	A	T	-0.142187	0.0769246	0.0770596	0.0394694	FALSE	TRUE	FALSE	GVY4Ce	59620508	0.206179	0.0608512	TRUE	reported	textfile	0.0286481	6.9336e-07	TRUE	reported	textfile	8192	TRUE	0.00299802	24.6276	48.6362
	rs10900223	C	T	C	T	-0.105448	0.0139453	0.250122	0.713769	FALSE	FALSE	FALSE	GVY4Ce	45526183	0.589874	0.0258716	TRUE	reported	textfile	0.0176162	2.15271e-09	TRUE	reported	textfile	8192	TRUE	0.00435479	35.8217	48.6362
	rs112819917	A	G	A	G	-0.438422	0.0733772	0.00817656	0.996826	FALSE	FALSE	FALSE	GVY4Ce	58310440	0.713894	0.200139	TRUE	reported	textfile	0.0855532	2.98241e-07	TRUE	reported	textfile	8192	TRUE	0.00319545	26.2546	48.6362
	rs115168226	G	A	G	A	-0.446554	0.0270426	0.00618191	0.974514	FALSE	FALSE	FALSE	GVY4Ce	39615371	0.716581	0.0744908	TRUE	reported	textfile	0.097039	4.18852e-06	TRUE	reported	textfile	8192	TRUE	0.00257836	21.1714	48.6362
	rs1171617	T	G	T	G	0.443332	-0.00390131	0.770118	0.160504	FALSE	FALSE	FALSE	GVY4Ce	59707424	0.902633	0.03189	TRUE	reported	textfile	0.0179927	4.75726e-134	TRUE	reported	textfile	8192	TRUE	0.0689965	606.959	48.6362
	rs12692101	T	A	T	A	-0.0812856	0.0239365	0.444305	0.447007	FALSE	TRUE	TRUE	GVY4Ce	129893296	0.318402	0.0239906	TRUE	reported	textfile	0.0159379	3.3939e-07	TRUE	reported	textfile	8192	FALSE	0.00316518	26.0051	48.6362
	rs13026148	A	G	A	G	-0.0706059	0.000839416	0.378223	0.65133	FALSE	FALSE	FALSE	GVY4Ce	214649844	0.973117	0.0249093	TRUE	reported	textfile	0.0158653	8.57356e-06	TRUE	reported	textfile	8192	TRUE	0.00241183	19.8006	48.6362
	rs13247874	T	C	T	C	-0.103668	-0.0397394	0.190234	0.822026	FALSE	FALSE	FALSE	GVY4Ce	73596112	0.193963	0.0305936	TRUE	reported	textfile	0.0195859	1.20324e-07	TRUE	reported	textfile	8192	TRUE	0.00340824	28.0089	48.6362
	rs138190991	A	T	A	T	-0.212246	-0.037822	0.0301671	0.0339142	FALSE	TRUE	FALSE	GVY4Ce	59984318	0.567664	0.0661808	TRUE	reported	textfile	0.0448917	2.26798e-06	TRUE	reported	textfile	8192	TRUE	0.00272128	22.3481	48.6362
	rs149235996	G	A	G	A	-0.56909	0.139038	0.0120372	0.99566	FALSE	FALSE	FALSE	GVY4Ce	151340348	0.456705	0.186808	TRUE	reported	textfile	0.0700396	4.46387e-16	TRUE	reported	textfile	8192	TRUE	0.00799464	66.0037	48.6362
	rs1511808	T	C	T	C	-0.0697692	-0.00082571	0.615503	0.395878	FALSE	FALSE	FALSE	GVY4Ce	188424754	0.972724	0.0241494	TRUE	reported	textfile	0.0157378	9.28299e-06	TRUE	reported	textfile	8192	TRUE	0.00239336	19.6487	48.6362
	rs1765260	A	G	A	G	-0.0999797	0.0173289	0.153343	0.920038	FALSE	FALSE	FALSE	GVY4Ce	79574005	0.687599	0.0430943	TRUE	reported	textfile	0.0211507	2.27832e-06	TRUE	reported	textfile	8192	TRUE	0.0027202	22.3392	48.6362
	rs2512510	A	G	A	G	-0.0870239	-0.0138238	0.216759	0.747138	FALSE	FALSE	FALSE	GVY4Ce	80402523	0.612029	0.0272562	TRUE	reported	textfile	0.0186419	3.03877e-06	TRUE	reported	textfile	8192	TRUE	0.0026531	21.7867	48.6362
	rs2625939	T	C	T	C	0.0859678	0.0110124	0.228206	0.837966	FALSE	FALSE	FALSE	GVY4Ce	94623634	0.729286	0.0318206	TRUE	reported	textfile	0.0183528	2.81073e-06	TRUE	reported	textfile	8192	TRUE	0.00267126	21.9362	48.6362
	rs4254516	C	G	C	G	-0.0700485	-0.0323935	0.455659	0.492808	FALSE	TRUE	TRUE	GVY4Ce	112944230	0.168469	0.0235223	TRUE	reported	textfile	0.0152171	4.15883e-06	TRUE	reported	textfile	8192	FALSE	0.00258001	21.185	48.6362
	rs55775057	A	G	A	G	-0.0960378	-0.0266736	0.150493	0.872365	FALSE	FALSE	FALSE	GVY4Ce	20146362	0.451024	0.0353898	TRUE	reported	textfile	0.0215564	8.38207e-06	TRUE	reported	textfile	8192	TRUE	0.00241708	19.8438	48.6362
	rs72836546	T	C	T	C	-0.0906795	-0.0582173	0.23482	0.781731	FALSE	FALSE	FALSE	GVY4Ce	14093088	0.041243	0.0285228	TRUE	reported	textfile	0.0180707	5.22043e-07	TRUE	reported	textfile	8192	TRUE	0.0030644	25.1746	48.6362
	rs73006619	C	A	C	A	-0.168203	0.0510962	0.0466597	0.961	FALSE	FALSE	FALSE	GVY4Ce	20498107	0.399817	0.060688	TRUE	reported	textfile	0.0368665	5.05538e-06	TRUE	reported	textfile	8192	TRUE	0.00253461	20.8112	48.6362
	rs73025372	G	A	G	A	0.157569	-0.0755882	0.0515375	0.959885	FALSE	FALSE	FALSE	GVY4Ce	15272857	0.218778	0.0614646	TRUE	reported	textfile	0.0346167	5.31831e-06	TRUE	reported	textfile	8192	TRUE	0.0025228	20.714	48.6362
	rs7537155	A	G	A	G	-0.0900652	-0.028796	0.199113	0.695405	FALSE	FALSE	FALSE	GVY4Ce	18880127	0.262487	0.0256986	TRUE	reported	textfile	0.019229	2.81588e-06	TRUE	reported	textfile	8192	TRUE	0.00267085	21.9328	48.6362
	rs76187828	G	A	G	A	-0.117619	-0.00449044	0.0930578	0.885573	FALSE	FALSE	FALSE	GVY4Ce	33762953	0.903502	0.0370382	TRUE	reported	textfile	0.0264472	8.69448e-06	TRUE	reported	textfile	8192	TRUE	0.00240856	19.7738	48.6362
	rs76638161	T	C	T	C	0.192728	0.0283202	0.0318954	0.993984	FALSE	FALSE	FALSE	GVY4Ce	109223591	0.851421	0.151198	TRUE	reported	textfile	0.0434891	9.35172e-06	TRUE	reported	textfile	8192	TRUE	0.00239166	19.6346	48.6362
	rs7705826	G	T	G	T	0.199276	0.00910517	0.833702	0.136153	FALSE	FALSE	FALSE	GVY4Ce	132396764	0.791354	0.0344174	TRUE	reported	textfile	0.0204928	2.37787e-22	TRUE	reported	textfile	8192	TRUE	0.0114112	94.5369	48.6362
	rs78428648	A	G	A	G	0.179162	0.00884144	0.0377174	0.968181	FALSE	FALSE	FALSE	GVY4Ce	115036848	0.894083	0.0664074	TRUE	reported	textfile	0.0400467	7.68304e-06	TRUE	reported	textfile	8192	TRUE	0.0024373	20.0102	48.6362
	rs78562549	T	G	T	G	0.394897	-0.0697499	0.00740514	0.983103	FALSE	FALSE	FALSE	GVY4Ce	36068755	0.458613	0.0941126	TRUE	reported	textfile	0.0881915	7.54445e-06	TRUE	reported	textfile	8192	TRUE	0.00244153	20.0451	48.6362
	rs79717472	G	A	G	A	-0.218081	-0.0561263	0.0280471	0.990518	FALSE	FALSE	FALSE	GVY4Ce	120853883	0.642061	0.120749	TRUE	reported	textfile	0.0461728	2.32235e-06	TRUE	reported	textfile	8192	TRUE	0.00271577	22.3027	48.6362
GCST90199622	rs11070230	G	A	G	A	-0.230238	0.189161	0.971915	0.004303	FALSE	FALSE	FALSE	GVY4Ce	39725132	0.296377	0.181148	TRUE	reported	textfile	0.0500968	4.30982e-06	TRUE	reported	textfile	7306	TRUE	0.00288271	21.1162	21.0662
	rs11166865	A	C	A	C	-0.0846751	-0.00182021	0.700507	0.284988	FALSE	FALSE	FALSE	GVY4Ce	138955456	0.944574	0.0261819	TRUE	reported	textfile	0.018635	5.52263e-06	TRUE	reported	textfile	7306	TRUE	0.00281804	20.6411	21.0662
	rs113989462	G	C	G	C	0.298062	-0.0472683	0.0159655	0.0370797	FALSE	TRUE	FALSE	GVY4Ce	10119238	0.456822	0.0635251	TRUE	reported	textfile	0.0656385	5.5997e-06	TRUE	reported	textfile	7306	TRUE	0.00281444	20.6147	21.0662
	rs11625375	T	C	T	C	-0.204178	0.00393301	0.965631	0.027338	FALSE	FALSE	FALSE	GVY4Ce	85809056	0.957462	0.0737362	TRUE	reported	textfile	0.045214	6.30756e-06	TRUE	reported	textfile	7306	TRUE	0.00278344	20.387	21.0662
	rs117191976	T	G	T	G	0.561037	-0.481858	0.00442784	0.999026	FALSE	FALSE	FALSE	GVY4Ce	7071429	0.175017	0.355285	TRUE	reported	textfile	0.121863	4.14808e-06	TRUE	reported	textfile	7306	TRUE	0.00289269	21.1895	21.0662
	rs11749139	G	T	G	T	-0.191343	0.0322105	0.0382593	0.931533	FALSE	FALSE	FALSE	GVY4Ce	76692142	0.494392	0.0471369	TRUE	reported	textfile	0.0427947	7.77842e-06	TRUE	reported	textfile	7306	TRUE	0.00272884	19.986	21.0662
	rs141054369	T	C	T	C	-0.413333	0.136975	0.00796594	0.997902	FALSE	FALSE	FALSE	GVY4Ce	198163971	0.574819	0.244176	TRUE	reported	textfile	0.0922709	7.47975e-06	TRUE	reported	textfile	7306	TRUE	0.00273905	20.061	21.0662
	rs149023824	G	A	G	A	0.721556	-0.167123	0.00253668	0.980821	FALSE	FALSE	FALSE	GVY4Ce	124909398	0.0611097	0.0892417	TRUE	reported	textfile	0.162488	8.96732e-06	TRUE	reported	textfile	7306	TRUE	0.00269183	19.7142	21.0662
	rs149187032	A	G	A	G	-0.341939	0.0503521	0.0116664	0.995421	FALSE	FALSE	FALSE	GVY4Ce	96874928	0.775124	0.176254	TRUE	reported	textfile	0.0762734	7.3576e-06	TRUE	reported	textfile	7306	TRUE	0.00274333	20.0924	21.0662
	rs186382517	C	T	C	T	1.05299	-0.0921002	0.00144389	0.954747	FALSE	FALSE	FALSE	GVY4Ce	127497198	0.106739	0.0570978	TRUE	reported	textfile	0.215383	1.01397e-06	TRUE	reported	textfile	7306	TRUE	0.00326083	23.895	21.0662
	rs2749463	C	G	C	G	-0.10725	0.00837109	0.844828	0.870763	FALSE	TRUE	FALSE	GVY4Ce	49018533	0.811555	0.0351107	TRUE	reported	textfile	0.022653	2.19626e-06	TRUE	reported	textfile	7306	TRUE	0.00305867	22.4091	21.0662
	rs62192967	T	A	T	A	-0.163284	-0.104316	0.0543493	0.02024	FALSE	TRUE	FALSE	GVY4Ce	241587764	0.210984	0.0833949	TRUE	reported	textfile	0.0362749	6.7542e-06	TRUE	reported	textfile	7306	TRUE	0.00276562	20.2561	21.0662
	rs62209511	T	C	T	C	-0.194544	0.0319243	0.0387693	0.92727	FALSE	FALSE	FALSE	GVY4Ce	23369148	0.487779	0.0460107	TRUE	reported	textfile	0.0425626	4.85941e-06	TRUE	reported	textfile	7306	TRUE	0.00285141	20.8863	21.0662
	rs6468762	A	G	A	G	0.319567	-0.0613975	0.0144798	0.986223	FALSE	FALSE	FALSE	GVY4Ce	101217958	0.54783	0.102157	TRUE	reported	textfile	0.068531	3.1148e-06	TRUE	reported	textfile	7306	TRUE	0.00296742	21.7386	21.0662
	rs72638543	T	C	T	C	0.185887	-0.105899	0.0417238	0.963562	FALSE	FALSE	FALSE	GVY4Ce	6935462	0.088483	0.0621674	TRUE	reported	textfile	0.0404404	4.29519e-06	TRUE	reported	textfile	7306	TRUE	0.00288359	21.1226	21.0662
	rs73801273	T	C	T	C	0.243319	0.00814931	0.0261245	0.99229	FALSE	FALSE	FALSE	GVY4Ce	167537696	0.950663	0.131709	TRUE	reported	textfile	0.0511669	1.98052e-06	TRUE	reported	textfile	7306	TRUE	0.00308569	22.6076	21.0662
	rs9863931	T	C	T	C	-0.108363	-0.0507618	0.132697	0.907222	FALSE	FALSE	FALSE	GVY4Ce	65029103	0.208511	0.0403617	TRUE	reported	textfile	0.0240017	6.33735e-06	TRUE	reported	textfile	7306	TRUE	0.0027822	20.3779	21.0662
	rs9943251	A	G	A	G	0.0830144	0.00411948	0.315014	0.729605	FALSE	FALSE	FALSE	GVY4Ce	151944639	0.8762	0.0264428	TRUE	reported	textfile	0.0176575	2.58422e-06	TRUE	reported	textfile	7306	TRUE	0.00301618	22.0968	21.0662
GCST90199623	rs112191400	T	C	T	C	-0.162748	0.063536	0.0864496	0.93287	FALSE	FALSE	FALSE	GVY4Ce	75101706	0.175839	0.0469357	TRUE	reported	textfile	0.0365529	8.49127e-06	TRUE	reported	textfile	4641	TRUE	0.00425329	19.8153	21.916
	rs113410972	A	G	A	G	0.141264	0.0371407	0.135389	0.86141	FALSE	FALSE	FALSE	GVY4Ce	134325888	0.27659	0.0341363	TRUE	reported	textfile	0.0309121	4.88054e-06	TRUE	reported	textfile	4641	TRUE	0.00447965	20.8746	21.916
	rs117257402	T	C	T	C	0.523098	0.0447861	0.00954654	0.992366	FALSE	FALSE	FALSE	GVY4Ce	83782516	0.747297	0.138998	TRUE	reported	textfile	0.106839	9.77447e-07	TRUE	reported	textfile	4641	TRUE	0.00513875	23.9618	21.916
	rs1230433	A	G	A	G	-0.105534	0.0112306	0.655467	0.30882	FALSE	FALSE	FALSE	GVY4Ce	46195297	0.660519	0.0255707	TRUE	reported	textfile	0.021612	1.04432e-06	TRUE	reported	textfile	4641	TRUE	0.00511161	23.8346	21.916
	rs12340914	G	A	G	A	0.0942204	-0.0251349	0.413842	0.637488	FALSE	FALSE	FALSE	GVY4Ce	18511076	0.305097	0.0245083	TRUE	reported	textfile	0.0211623	8.49668e-06	TRUE	reported	textfile	4641	TRUE	0.00425306	19.8142	21.916
	rs1254839	G	A	G	A	-0.107757	0.00487206	0.322023	0.65191	FALSE	FALSE	FALSE	GVY4Ce	61953888	0.844641	0.0248624	TRUE	reported	textfile	0.0223276	1.39183e-06	TRUE	reported	textfile	4641	TRUE	0.00499369	23.282	21.916
	rs1360005	C	T	C	T	0.097467	-0.00557287	0.510903	0.444542	FALSE	FALSE	FALSE	GVY4Ce	95311303	0.814314	0.023728	TRUE	reported	textfile	0.0207116	2.52725e-06	TRUE	reported	textfile	4641	TRUE	0.00474907	22.1361	21.916
	rs141782806	C	T	C	T	-0.367335	0.00223558	0.0169583	0.945416	FALSE	FALSE	FALSE	GVY4Ce	22791486	0.965563	0.05178	TRUE	reported	textfile	0.0795794	3.91306e-06	TRUE	reported	textfile	4641	TRUE	0.00457007	21.2979	21.916
	rs1426466	C	T	C	T	-0.114917	-0.00246996	0.801944	0.236996	FALSE	FALSE	FALSE	GVY4Ce	107378790	0.929034	0.0277336	TRUE	reported	textfile	0.0260009	9.88191e-06	TRUE	reported	textfile	4641	TRUE	0.00419137	19.5256	21.916
	rs147666382	A	G	A	G	-0.2699	0.167403	0.0362508	0.988934	FALSE	FALSE	FALSE	GVY4Ce	209703171	0.133365	0.11153	TRUE	reported	textfile	0.0550729	9.54593e-07	TRUE	reported	textfile	4641	TRUE	0.00514845	24.0073	21.916
	rs150000891	T	G	T	G	-0.322444	0.0486001	0.0219792	0.966896	FALSE	FALSE	FALSE	GVY4Ce	1931505	0.465895	0.0666508	TRUE	reported	textfile	0.0705527	4.87109e-06	TRUE	reported	textfile	4641	TRUE	0.00448043	20.8783	21.916
	rs150215008	T	C	T	C	-0.229438	-0.150779	0.044205	0.978129	FALSE	FALSE	FALSE	GVY4Ce	99994779	0.0661424	0.0820583	TRUE	reported	textfile	0.0505115	5.56468e-06	TRUE	reported	textfile	4641	TRUE	0.00442601	20.6235	21.916
	rs3741902	C	T	C	T	-0.113786	-0.0502468	0.201663	0.859709	FALSE	FALSE	FALSE	GVY4Ce	5921136	0.141663	0.0341902	TRUE	reported	textfile	0.025745	9.88314e-06	TRUE	reported	textfile	4641	TRUE	0.00419137	19.5256	21.916
	rs3935534	C	G	C	G	-0.105364	-0.0385553	0.682113	0.726325	FALSE	TRUE	FALSE	GVY4Ce	61386873	0.145007	0.026455	TRUE	reported	textfile	0.0225011	2.83227e-06	TRUE	reported	textfile	4641	TRUE	0.00470239	21.9174	21.916
	rs6006574	C	G	C	G	0.285259	-0.0816667	0.0282214	0.0465183	FALSE	TRUE	FALSE	GVY4Ce	43905879	0.151063	0.0568793	TRUE	reported	textfile	0.0623725	4.7969e-06	TRUE	reported	textfile	4641	TRUE	0.00448671	20.9076	21.916
	rs62317587	C	A	C	A	-0.475907	0.0079235	0.0101798	0.996238	FALSE	FALSE	FALSE	GVY4Ce	58402103	0.967711	0.19574	TRUE	reported	textfile	0.103471	4.23694e-06	TRUE	reported	textfile	4641	TRUE	0.00453754	21.1456	21.916
	rs72552153	A	G	A	G	-0.451935	0.168521	0.0123004	0.996391	FALSE	FALSE	FALSE	GVY4Ce	123627498	0.399116	0.199858	TRUE	reported	textfile	0.0933029	1.27418e-06	TRUE	reported	textfile	4641	TRUE	0.00502991	23.4517	21.916
	rs72670481	T	C	T	C	-0.287487	-0.0272526	0.0444222	0.956576	FALSE	FALSE	FALSE	GVY4Ce	68255458	0.642288	0.0586704	TRUE	reported	textfile	0.0506395	1.36972e-08	TRUE	reported	textfile	4641	TRUE	0.00689669	32.2159	21.916
	rs75183407	T	C	T	C	-0.330457	0.0546219	0.0230852	0.963033	FALSE	FALSE	FALSE	GVY4Ce	129779913	0.393803	0.0640544	TRUE	reported	textfile	0.0688133	1.56907e-06	TRUE	reported	textfile	4641	TRUE	0.00494448	23.0514	21.916
	rs7525374	G	A	G	A	0.0950368	-0.0139398	0.525656	0.451448	FALSE	FALSE	FALSE	GVY4Ce	4693997	0.556924	0.0237308	TRUE	reported	textfile	0.0212325	7.60482e-06	TRUE	reported	textfile	4641	TRUE	0.00429832	20.026	21.916
	rs78910814	C	T	C	T	-0.253193	-0.0944845	0.036	0.966211	FALSE	FALSE	FALSE	GVY4Ce	82118868	0.139766	0.0639852	TRUE	reported	textfile	0.055947	6.0231e-06	TRUE	reported	textfile	4641	TRUE	0.00439365	20.4721	21.916
	rs79441497	G	A	G	A	0.282649	-0.0425463	0.0274713	0.96141	FALSE	FALSE	FALSE	GVY4Ce	139973386	0.490281	0.0616735	TRUE	reported	textfile	0.0627987	6.76728e-06	TRUE	reported	textfile	4641	TRUE	0.00434601	20.2491	21.916
	rs9855944	A	G	A	G	0.0992769	-0.00565295	0.360843	0.616267	FALSE	FALSE	FALSE	GVY4Ce	141700065	0.815349	0.0242064	TRUE	reported	textfile	0.0216311	4.44236e-06	TRUE	reported	textfile	4641	TRUE	0.00451815	21.0548	21.916
GCST90199624	rs10106654	C	A	C	A	0.0933587	0.00917341	0.15585	0.80972	FALSE	FALSE	FALSE	GVY4Ce	95891757	0.760671	0.0301164	TRUE	reported	textfile	0.0209933	8.70498e-06	TRUE	reported	textfile	8260	TRUE	0.00238852	19.7717	21.3892
	rs1038161	A	T	A	T	-0.0698072	0.0106772	0.396795	0.354318	FALSE	TRUE	FALSE	GVY4Ce	75651631	0.663312	0.0245259	TRUE	reported	textfile	0.0156983	8.71615e-06	TRUE	reported	textfile	8260	TRUE	0.00238823	19.7692	21.3892
	rs10818729	C	T	C	T	-0.0744274	-0.00314474	0.678724	0.248481	FALSE	FALSE	FALSE	GVY4Ce	122609637	0.9076	0.0270944	TRUE	reported	textfile	0.0165535	6.91823e-06	TRUE	reported	textfile	8260	TRUE	0.00244143	20.2107	21.3892
	rs114849156	A	G	A	G	0.19722	-0.00551833	0.0321241	0.952823	FALSE	FALSE	FALSE	GVY4Ce	106789058	0.921496	0.0559958	TRUE	reported	textfile	0.043393	5.49424e-06	TRUE	reported	textfile	8260	TRUE	0.00249458	20.6518	21.3892
	rs1271526	T	C	T	C	0.0916728	0.0414865	0.824509	0.162311	FALSE	FALSE	FALSE	GVY4Ce	120838827	0.192345	0.0318228	TRUE	reported	textfile	0.0200283	4.71341e-06	TRUE	reported	textfile	8260	TRUE	0.00252995	20.9454	21.3892
	rs12782560	T	C	T	C	0.224836	-0.0585753	0.0246989	0.955955	FALSE	FALSE	FALSE	GVY4Ce	31021128	0.300114	0.0565295	TRUE	reported	textfile	0.049354	5.2242e-06	TRUE	reported	textfile	8260	TRUE	0.00250621	20.7483	21.3892
	rs138633790	A	G	A	G	-0.220573	-0.204458	0.0243022	0.994734	FALSE	FALSE	FALSE	GVY4Ce	111879060	0.203967	0.160949	TRUE	reported	textfile	0.0497508	9.26909e-06	TRUE	reported	textfile	8260	TRUE	0.00237406	19.6517	21.3892
	rs1505993	T	C	T	C	-0.24093	0.0149164	0.0219714	0.963672	FALSE	FALSE	FALSE	GVY4Ce	40519286	0.809075	0.0617351	TRUE	reported	textfile	0.0524855	4.42373e-06	TRUE	reported	textfile	8260	TRUE	0.00254458	21.0668	21.3892
	rs16909710	T	C	T	C	-0.19262	0.202793	0.0418998	0.979988	FALSE	FALSE	FALSE	GVY4Ce	14111937	0.0160177	0.0841984	TRUE	reported	textfile	0.0384132	5.31941e-07	TRUE	reported	textfile	8260	TRUE	0.00303488	25.1383	21.3892
	rs2886306	T	C	T	C	0.0716047	-0.00890623	0.645165	0.366336	FALSE	FALSE	FALSE	GVY4Ce	133146393	0.716914	0.0245631	TRUE	reported	textfile	0.016209	9.98048e-06	TRUE	reported	textfile	8260	TRUE	0.00235703	19.5104	21.3892
	rs375709482	T	C	T	C	-0.255607	0.0864324	0.0190974	0.987631	FALSE	FALSE	FALSE	GVY4Ce	114434155	0.426434	0.108678	TRUE	reported	textfile	0.0555964	4.27499e-06	TRUE	reported	textfile	8260	TRUE	0.00255248	21.1323	21.3892
	rs3779084	G	A	G	A	0.0853795	-0.0195371	0.212634	0.706319	FALSE	FALSE	FALSE	GVY4Ce	50501037	0.454604	0.0261274	TRUE	reported	textfile	0.0186386	4.63251e-06	TRUE	reported	textfile	8260	TRUE	0.00253395	20.9786	21.3892
	rs56266656	G	A	G	A	0.222284	0.131298	0.0243576	0.995821	FALSE	FALSE	FALSE	GVY4Ce	31286351	0.480318	0.18603	TRUE	reported	textfile	0.0498262	8.15059e-06	TRUE	reported	textfile	8260	TRUE	0.00240367	19.8974	21.3892
	rs62326335	G	C	C	A	-0.0890288	-0.0572256	0.236388	0.000520186	TRUE	TRUE	FALSE	GVY4Ce	171966715	0.922209	0.58602	TRUE	reported	textfile	0.0182274	1.03783e-06	TRUE	reported	textfile	8260	FALSE	0.00287991	23.851	21.3892
	rs6443435	C	T	C	T	0.0729509	0.0296922	0.555966	0.341992	FALSE	FALSE	FALSE	GVY4Ce	177202726	0.233446	0.0249195	TRUE	reported	textfile	0.0155727	2.80605e-06	TRUE	reported	textfile	8260	TRUE	0.00264973	21.9396	21.3892
	rs7073480	C	T	C	T	0.121973	-0.0060055	0.886196	0.099476	FALSE	FALSE	FALSE	GVY4Ce	13172160	0.878614	0.0393218	TRUE	reported	textfile	0.0241952	4.62648e-07	TRUE	reported	textfile	8260	TRUE	0.00306729	25.4076	21.3892
	rs72770519	A	G	A	G	-0.0980699	-0.0217413	0.162015	0.862342	FALSE	FALSE	FALSE	GVY4Ce	22787037	0.526838	0.034355	TRUE	reported	textfile	0.0209321	2.79769e-06	TRUE	reported	textfile	8260	TRUE	0.00265041	21.9453	21.3892
	rs72782456	G	A	G	A	-0.132885	0.0840006	0.0718974	0.931662	FALSE	FALSE	FALSE	GVY4Ce	65558706	0.0718026	0.0466576	TRUE	reported	textfile	0.0298174	8.32618e-06	TRUE	reported	textfile	8260	TRUE	0.00239877	19.8567	21.3892
	rs76464474	T	G	T	G	0.398426	0.0981067	0.00903651	0.97475	FALSE	FALSE	FALSE	GVY4Ce	124970733	0.189489	0.0747713	TRUE	reported	textfile	0.0814489	9.99571e-07	TRUE	reported	textfile	8260	TRUE	0.00288861	23.9232	21.3892
GCST90199625	rs1020048	C	A	C	A	-0.102991	-0.0397927	0.809931	0.167247	FALSE	FALSE	FALSE	GVY4Ce	84052078	0.205686	0.0314438	TRUE	reported	textfile	0.0198761	2.19934e-07	TRUE	reported	textfile	8243	TRUE	0.00324667	26.843	21.8766
	rs1116046	T	A	T	A	-0.132929	-0.0633836	0.0777355	0.0640961	FALSE	TRUE	FALSE	GVY4Ce	102243065	0.181361	0.0474223	TRUE	reported	textfile	0.0291497	5.11035e-06	TRUE	reported	textfile	8243	TRUE	0.00251647	20.7905	21.8766
	rs112196227	T	A	T	A	0.131339	-0.0342882	0.0757631	0.0789561	FALSE	TRUE	FALSE	GVY4Ce	96678263	0.43036	0.0434811	TRUE	reported	textfile	0.0291534	6.63451e-06	TRUE	reported	textfile	8243	TRUE	0.00245615	20.291	21.8766
	rs112256623	A	G	A	G	-0.222873	-0.0970231	0.0237401	0.976333	FALSE	FALSE	FALSE	GVY4Ce	46907811	0.218114	0.0787807	TRUE	reported	textfile	0.0498876	7.91375e-06	TRUE	reported	textfile	8243	TRUE	0.00241543	19.9537	21.8766
	rs113966925	T	C	T	C	0.214979	-0.0342363	0.0264921	0.985847	FALSE	FALSE	FALSE	GVY4Ce	130155762	0.725098	0.0973582	TRUE	reported	textfile	0.0483488	8.73154e-06	TRUE	reported	textfile	8243	TRUE	0.00239274	19.7658	21.8766
	rs114314137	G	A	G	A	-0.37398	0.0518392	0.0085003	0.987111	FALSE	FALSE	FALSE	GVY4Ce	113140407	0.626198	0.106427	TRUE	reported	textfile	0.0844596	9.51482e-06	TRUE	reported	textfile	8243	TRUE	0.00237291	19.6017	21.8766
	rs114588795	G	C	G	C	0.384825	-0.0687486	0.00783813	0.017053	FALSE	TRUE	FALSE	GVY4Ce	207577160	0.475236	0.0962884	TRUE	reported	textfile	0.0865739	8.78741e-06	TRUE	reported	textfile	8243	TRUE	0.00239126	19.7536	21.8766
	rs12216870	T	C	T	C	-0.256812	0.0419748	0.0196162	0.987991	FALSE	FALSE	FALSE	GVY4Ce	9495449	0.704878	0.110826	TRUE	reported	textfile	0.0555271	3.74623e-06	TRUE	reported	textfile	8243	TRUE	0.00258827	21.3853	21.8766
	rs12323117	C	T	C	T	-0.107817	0.0163045	0.11287	0.826471	FALSE	FALSE	FALSE	GVY4Ce	20995088	0.601197	0.031194	TRUE	reported	textfile	0.0242782	8.95865e-06	TRUE	reported	textfile	8243	TRUE	0.00238681	19.7168	21.8766
	rs142260529	T	C	T	C	0.289855	0.086066	0.0147077	0.987177	FALSE	FALSE	FALSE	GVY4Ce	21700521	0.405775	0.103525	TRUE	reported	textfile	0.0644979	6.9889e-06	TRUE	reported	textfile	8243	TRUE	0.00244412	20.1913	21.8766
	rs146859626	C	T	C	T	-0.333664	-0.0653518	0.0110218	0.982074	FALSE	FALSE	FALSE	GVY4Ce	185815120	0.461965	0.0888397	TRUE	reported	textfile	0.0740513	6.61053e-06	TRUE	reported	textfile	8243	TRUE	0.00245697	20.2978	21.8766
	rs146902454	C	T	C	T	-0.222442	0.0344124	0.0354437	0.922999	FALSE	FALSE	FALSE	GVY4Ce	51754403	0.434237	0.0440077	TRUE	reported	textfile	0.0421167	1.2809e-07	TRUE	reported	textfile	8243	TRUE	0.00337266	27.8881	21.8766
	rs162588	A	G	A	G	0.0843917	-0.0330417	0.212029	0.841489	FALSE	FALSE	FALSE	GVY4Ce	322415	0.301839	0.0320018	TRUE	reported	textfile	0.0189141	8.12626e-06	TRUE	reported	textfile	8243	TRUE	0.00240932	19.9032	21.8766
	rs3138108	T	C	T	C	0.0870865	-0.0202992	0.230257	0.783671	FALSE	FALSE	FALSE	GVY4Ce	227802190	0.480314	0.0287607	TRUE	reported	textfile	0.0182194	1.75401e-06	TRUE	reported	textfile	8243	TRUE	0.00276405	22.8417	21.8766
	rs390784	T	G	T	G	0.076227	-6.39016e-05	0.464723	0.510336	FALSE	FALSE	FALSE	GVY4Ce	43984037	0.997841	0.0236171	TRUE	reported	textfile	0.0154744	8.39336e-07	TRUE	reported	textfile	8243	TRUE	0.00293514	24.2597	21.8766
	rs4862595	T	C	T	C	0.0750216	0.0221113	0.6944	0.296435	FALSE	FALSE	FALSE	GVY4Ce	185925809	0.390443	0.0257464	TRUE	reported	textfile	0.0167234	7.25667e-06	TRUE	reported	textfile	8243	TRUE	0.00243545	20.1195	21.8766
	rs57419073	A	G	A	G	-0.125118	-0.00916892	0.0856622	0.915698	FALSE	FALSE	FALSE	GVY4Ce	48520065	0.827984	0.042197	TRUE	reported	textfile	0.0275801	5.71868e-06	TRUE	reported	textfile	8243	TRUE	0.00249046	20.5751	21.8766
	rs66676945	T	C	T	C	0.0997286	-0.0573556	0.18189	0.84202	FALSE	FALSE	FALSE	GVY4Ce	158982497	0.0742489	0.0321307	TRUE	reported	textfile	0.0200715	6.74151e-07	TRUE	reported	textfile	8243	TRUE	0.00298604	24.6817	21.8766
	rs6706818	G	A	G	A	0.076177	-0.019153	0.297934	0.641723	FALSE	FALSE	FALSE	GVY4Ce	56347297	0.436006	0.024588	TRUE	reported	textfile	0.0168437	6.10924e-06	TRUE	reported	textfile	8243	TRUE	0.0024752	20.4488	21.8766
	rs74981086	A	G	A	G	-0.207867	0.0396835	0.0321797	0.963688	FALSE	FALSE	FALSE	GVY4Ce	26798495	0.525267	0.0624694	TRUE	reported	textfile	0.044132	2.47574e-06	TRUE	reported	textfile	8243	TRUE	0.00268418	22.1798	21.8766
	rs76954145	T	C	T	C	-0.192677	-0.0340058	0.0434198	0.972693	FALSE	FALSE	FALSE	GVY4Ce	101716593	0.647263	0.0743186	TRUE	reported	textfile	0.0380845	4.2103e-07	TRUE	reported	textfile	8243	TRUE	0.0030955	25.5893	21.8766
	rs7708674	T	C	T	C	-0.13605	0.056135	0.0742635	0.916641	FALSE	FALSE	FALSE	GVY4Ce	61263052	0.188604	0.0426973	TRUE	reported	textfile	0.0295137	4.032e-06	TRUE	reported	textfile	8243	TRUE	0.00257126	21.2444	21.8766
	rs78631663	C	T	C	T	0.256598	0.00814264	0.0180649	0.967262	FALSE	FALSE	FALSE	GVY4Ce	5080675	0.902948	0.0667768	TRUE	reported	textfile	0.0575554	8.26193e-06	TRUE	reported	textfile	8243	TRUE	0.00240549	19.8714	21.8766
	rs78762284	A	G	A	G	0.1179	-0.000959194	0.14571	0.89197	FALSE	FALSE	FALSE	GVY4Ce	110706960	0.980334	0.0389119	TRUE	reported	textfile	0.0220764	9.26651e-08	TRUE	reported	textfile	8243	TRUE	0.00344815	28.5145	21.8766
	rs7990044	G	A	G	A	0.0695317	0.0493693	0.510057	0.454175	FALSE	FALSE	FALSE	GVY4Ce	88053943	0.0367782	0.0236419	TRUE	reported	textfile	0.0154663	6.93449e-06	TRUE	reported	textfile	8243	TRUE	0.00244593	20.2063	21.8766
GCST90199626	rs10518870	G	A	G	A	0.0728152	-0.0061372	0.559125	0.385103	FALSE	FALSE	FALSE	GVY4Ce	56725690	0.800356	0.0242686	TRUE	reported	textfile	0.0159215	4.79876e-06	TRUE	reported	textfile	7965	TRUE	0.0026191	20.9106	26.5556
	rs10901595	T	C	T	C	-0.0850013	-0.00304851	0.205555	0.848692	FALSE	FALSE	FALSE	GVY4Ce	126332367	0.925988	0.0328173	TRUE	reported	textfile	0.0190317	7.95847e-06	TRUE	reported	textfile	7965	TRUE	0.00249818	19.9428	26.5556
	rs11037948	C	G	C	G	-0.0757183	0.0142207	0.45907	0.445321	FALSE	TRUE	TRUE	GVY4Ce	44303357	0.54803	0.023673	TRUE	reported	textfile	0.0157914	1.62757e-06	TRUE	reported	textfile	7965	FALSE	0.00287821	22.9854	26.5556
	rs115107012	A	G	A	G	0.355674	0.162845	0.00953162	0.985351	FALSE	FALSE	FALSE	GVY4Ce	108435076	0.0931258	0.0969813	TRUE	reported	textfile	0.0792725	7.23249e-06	TRUE	reported	textfile	7965	TRUE	0.00252102	20.1257	26.5556
	rs117446717	G	A	G	A	0.337234	-0.0855754	0.0107723	0.991582	FALSE	FALSE	FALSE	GVY4Ce	86716358	0.511725	0.13042	TRUE	reported	textfile	0.0755884	8.14081e-06	TRUE	reported	textfile	7965	TRUE	0.00249277	19.8996	26.5556
	rs117776343	C	A	C	A	-0.254301	-0.0488327	0.0229805	0.990054	FALSE	FALSE	FALSE	GVY4Ce	91044447	0.683082	0.119611	TRUE	reported	textfile	0.0519299	9.73115e-07	TRUE	reported	textfile	7965	TRUE	0.00300172	23.9746	26.5556
	rs13038820	A	G	A	G	-0.108314	-0.00768113	0.152841	0.824781	FALSE	FALSE	FALSE	GVY4Ce	38613187	0.803818	0.0309212	TRUE	reported	textfile	0.0216513	5.65531e-07	TRUE	reported	textfile	7965	TRUE	0.00313223	25.0203	26.5556
	rs1339135	G	A	G	A	-0.102275	-0.0182865	0.142632	0.86642	FALSE	FALSE	FALSE	GVY4Ce	164891445	0.597693	0.0346518	TRUE	reported	textfile	0.0221736	3.97938e-06	TRUE	reported	textfile	7965	TRUE	0.00266393	21.2695	26.5556
	rs142739097	G	A	G	A	-0.281069	-0.0154236	0.0170605	0.96334	FALSE	FALSE	FALSE	GVY4Ce	82428809	0.803718	0.0620571	TRUE	reported	textfile	0.0600788	2.8921e-06	TRUE	reported	textfile	7965	TRUE	0.00274035	21.8814	26.5556
	rs148768795	A	G	A	G	-0.343757	-0.00643927	0.0102144	0.995526	FALSE	FALSE	FALSE	GVY4Ce	150393911	0.971987	0.183369	TRUE	reported	textfile	0.0773679	8.86512e-06	TRUE	reported	textfile	7965	TRUE	0.00247241	19.7366	26.5556
	rs150456440	A	G	A	G	-0.207866	-0.10364	0.0283656	0.971467	FALSE	FALSE	FALSE	GVY4Ce	1787443	0.130427	0.0685259	TRUE	reported	textfile	0.0469472	9.52642e-06	TRUE	reported	textfile	7965	TRUE	0.00245524	19.5992	26.5556
	rs189750460	C	T	C	T	0.201137	-0.0612911	0.0313286	0.971636	FALSE	FALSE	FALSE	GVY4Ce	45640754	0.383992	0.0704038	TRUE	reported	textfile	0.044222	5.40694e-06	TRUE	reported	textfile	7965	TRUE	0.00259057	20.6823	26.5556
	rs2762353	G	A	G	A	0.108263	-0.00720103	0.556451	0.373052	FALSE	FALSE	FALSE	GVY4Ce	25794203	0.767848	0.0243945	TRUE	reported	textfile	0.0156013	3.93898e-12	TRUE	reported	textfile	7965	TRUE	0.00600945	48.1426	26.5556
	rs354710	T	C	T	C	0.0973775	0.0259227	0.587063	0.381103	FALSE	FALSE	FALSE	GVY4Ce	143129515	0.28418	0.0242048	TRUE	reported	textfile	0.0160404	1.27297e-09	TRUE	reported	textfile	7965	TRUE	0.00460571	36.8449	26.5556
	rs41294573	T	C	T	C	0.148756	0.0594651	0.0615182	0.974647	FALSE	FALSE	FALSE	GVY4Ce	5983272	0.434695	0.0761218	TRUE	reported	textfile	0.0320487	3.45762e-06	TRUE	reported	textfile	7965	TRUE	0.00269755	21.5387	26.5556
	rs4148325	T	C	T	C	0.160369	0.0296187	0.326316	0.608012	FALSE	FALSE	FALSE	GVY4Ce	233764663	0.220817	0.0241912	TRUE	reported	textfile	0.0164451	1.81218e-22	TRUE	reported	textfile	7965	TRUE	0.0117985	95.0733	26.5556
	rs4654393	A	G	A	G	-0.0716015	-0.0495669	0.43716	0.51952	FALSE	FALSE	FALSE	GVY4Ce	29207925	0.035456	0.0235684	TRUE	reported	textfile	0.0157954	5.8138e-06	TRUE	reported	textfile	7965	TRUE	0.00257323	20.5435	26.5556
	rs4952404	T	C	T	C	0.0900816	-0.0059949	0.209216	0.72665	FALSE	FALSE	FALSE	GVY4Ce	40333490	0.821661	0.0265956	TRUE	reported	textfile	0.0193387	3.1916e-06	TRUE	reported	textfile	7965	TRUE	0.00271675	21.6924	26.5556
	rs55953511	A	G	A	G	0.260906	-0.0557617	0.0251338	0.986259	FALSE	FALSE	FALSE	GVY4Ce	88277900	0.58935	0.103305	TRUE	reported	textfile	0.0506967	2.65512e-07	TRUE	reported	textfile	7965	TRUE	0.00331422	26.4789	26.5556
	rs610480	G	A	G	A	0.0847289	0.0703461	0.764105	0.221229	FALSE	FALSE	FALSE	GVY4Ce	139895926	0.0138973	0.028597	TRUE	reported	textfile	0.0185433	4.89465e-06	TRUE	reported	textfile	7965	TRUE	0.00261437	20.8728	26.5556
	rs62344716	A	G	A	G	-0.150456	-0.0141288	0.065916	0.94707	FALSE	FALSE	FALSE	GVY4Ce	170071702	0.789776	0.0529962	TRUE	reported	textfile	0.0311209	1.33435e-06	TRUE	reported	textfile	7965	TRUE	0.00292588	23.3671	26.5556
	rs74323113	T	G	T	G	0.240073	-0.055746	0.0231871	0.972506	FALSE	FALSE	FALSE	GVY4Ce	110473158	0.447928	0.0734589	TRUE	reported	textfile	0.0515337	3.18436e-06	TRUE	reported	textfile	7965	TRUE	0.00271729	21.6968	26.5556
	rs75152214	A	G	A	G	-0.1598	0.224423	0.0494948	0.953617	FALSE	FALSE	FALSE	GVY4Ce	64543641	0.000224797	0.0608294	TRUE	reported	textfile	0.0360557	9.33471e-06	TRUE	reported	textfile	7965	TRUE	0.00246009	19.638	26.5556
	rs76961499	T	C	T	C	-0.174429	0.0699415	0.0443616	0.938367	FALSE	FALSE	FALSE	GVY4Ce	123940473	0.154588	0.0491332	TRUE	reported	textfile	0.0379757	4.36543e-06	TRUE	reported	textfile	7965	TRUE	0.00264175	21.092	26.5556
	rs80253618	A	G	A	G	0.145764	-0.0263822	0.114498	0.920584	FALSE	FALSE	FALSE	GVY4Ce	169940405	0.545877	0.0436829	TRUE	reported	textfile	0.0245961	3.09841e-09	TRUE	reported	textfile	7965	TRUE	0.00439007	35.1123	26.5556
	rs8058114	A	G	A	G	0.0980895	-0.0101342	0.167555	0.864898	FALSE	FALSE	FALSE	GVY4Ce	12603772	0.770797	0.0347856	TRUE	reported	textfile	0.0207577	2.29605e-06	TRUE	reported	textfile	7965	TRUE	0.00279566	22.3243	26.5556
GCST90199627	rs10168931	A	G	A	G	0.203073	0.026372	0.237802	0.822585	FALSE	FALSE	FALSE	GVY4Ce	73650092	0.391488	0.0307753	TRUE	reported	textfile	0.02127	1.32992e-21	TRUE	reported	textfile	5606	TRUE	0.0159997	91.1201	25.1309
	rs117299913	C	T	C	T	0.27471	0.140227	0.0263158	0.963257	FALSE	FALSE	FALSE	GVY4Ce	124610707	0.0321692	0.0654564	TRUE	reported	textfile	0.0585098	2.66467e-06	TRUE	reported	textfile	5606	TRUE	0.00391683	22.0362	25.1309
	rs117790062	T	C	T	C	0.207108	-0.0668684	0.0408473	0.957172	FALSE	FALSE	FALSE	GVY4Ce	113354078	0.241539	0.0570964	TRUE	reported	textfile	0.0466507	9.01451e-06	TRUE	reported	textfile	5606	TRUE	0.00350348	19.7026	25.1309
	rs13184558	C	T	C	T	0.215007	-0.111026	0.038115	0.952654	FALSE	FALSE	FALSE	GVY4Ce	26807776	0.0541327	0.0576527	TRUE	reported	textfile	0.0481609	8.03104e-06	TRUE	reported	textfile	5606	TRUE	0.0035426	19.9233	25.1309
	rs13296886	G	C	G	C	-0.158395	0.0158321	0.0835143	0.0892823	FALSE	TRUE	FALSE	GVY4Ce	81723130	0.700729	0.0411934	TRUE	reported	textfile	0.0335323	2.31636e-06	TRUE	reported	textfile	5606	TRUE	0.00396441	22.305	25.1309
	rs145450037	C	A	C	A	-0.417245	-0.265523	0.0109299	0.98681	FALSE	FALSE	FALSE	GVY4Ce	6864294	0.0118468	0.105505	TRUE	reported	textfile	0.0891187	2.84233e-06	TRUE	reported	textfile	5606	TRUE	0.0038949	21.9124	25.1309
	rs149122905	G	A	G	A	0.414825	-0.00778768	0.010359	0.99783	FALSE	FALSE	FALSE	GVY4Ce	102029922	0.976819	0.268018	TRUE	reported	textfile	0.0905551	4.62956e-06	TRUE	reported	textfile	5606	TRUE	0.00372931	20.9773	25.1309
	rs17360657	C	T	C	T	0.238255	-0.041831	0.0336427	0.971288	FALSE	FALSE	FALSE	GVY4Ce	36548250	0.561857	0.0721118	TRUE	reported	textfile	0.0504986	2.38105e-06	TRUE	reported	textfile	5606	TRUE	0.00395504	22.2521	25.1309
	rs182387902	T	C	T	C	-0.469348	-0.000304808	0.0100683	0.973252	FALSE	FALSE	FALSE	GVY4Ce	7573804	0.996744	0.0746956	TRUE	reported	textfile	0.0920617	3.42909e-07	TRUE	reported	textfile	5606	TRUE	0.00461498	25.9823	25.1309
	rs2125440	G	C	G	C	0.0843011	-0.00326468	0.526382	0.521602	FALSE	TRUE	TRUE	GVY4Ce	113905989	0.889787	0.0235592	TRUE	reported	textfile	0.0185782	5.6889e-06	TRUE	reported	textfile	5606	FALSE	0.00365943	20.5828	25.1309
	rs4430142	C	G	C	G	-0.395874	-0.364585	0.987774	0.997702	FALSE	TRUE	FALSE	GVY4Ce	1956595	0.146953	0.251373	TRUE	reported	textfile	0.0878042	6.52549e-06	TRUE	reported	textfile	5606	TRUE	0.00361292	20.3202	25.1309
	rs4960616	C	T	C	T	-0.187249	-0.0021171	0.06269	0.927524	FALSE	FALSE	FALSE	GVY4Ce	154799440	0.962994	0.0456299	TRUE	reported	textfile	0.037458	5.76543e-07	TRUE	reported	textfile	5606	TRUE	0.00443777	24.9801	25.1309
	rs62053878	T	C	T	C	-0.307882	-0.04284	0.0191106	0.963032	FALSE	FALSE	FALSE	GVY4Ce	13932613	0.494516	0.0627101	TRUE	reported	textfile	0.0672143	4.63646e-06	TRUE	reported	textfile	5606	TRUE	0.00372881	20.9744	25.1309
	rs6507370	C	T	C	T	0.0923915	-0.0236062	0.373838	0.607329	FALSE	FALSE	FALSE	GVY4Ce	40588675	0.328172	0.0241421	TRUE	reported	textfile	0.0189886	1.14088e-06	TRUE	reported	textfile	5606	TRUE	0.00420528	23.6659	25.1309
	rs6846979	G	A	G	A	0.101172	-0.0203693	0.216337	0.749639	FALSE	FALSE	FALSE	GVY4Ce	47755798	0.457037	0.0273878	TRUE	reported	textfile	0.0223797	6.1633e-06	TRUE	reported	textfile	5606	TRUE	0.00363227	20.4295	25.1309
	rs758072	T	G	T	G	0.171213	-0.0250742	0.0731357	0.954476	FALSE	FALSE	FALSE	GVY4Ce	241144457	0.654659	0.0560568	TRUE	reported	textfile	0.0359573	1.92102e-06	TRUE	reported	textfile	5606	TRUE	0.00402804	22.6644	25.1309
	rs76075534	T	C	T	C	-0.205346	0.0881305	0.0424259	0.959628	FALSE	FALSE	FALSE	GVY4Ce	26212334	0.13121	0.0583897	TRUE	reported	textfile	0.0457631	7.21786e-06	TRUE	reported	textfile	5606	TRUE	0.00357875	20.1274	25.1309
	rs77300395	T	C	T	C	0.268952	0.108738	0.0258012	0.94302	FALSE	FALSE	FALSE	GVY4Ce	19535694	0.0380776	0.0524284	TRUE	reported	textfile	0.0583612	4.05768e-06	TRUE	reported	textfile	5606	TRUE	0.00377403	21.2298	25.1309
	rs77556524	G	C	G	C	-0.335972	-0.0190706	0.016622	0.0163046	FALSE	TRUE	FALSE	GVY4Ce	174783352	0.843411	0.0965444	TRUE	reported	textfile	0.0714166	2.54621e-06	TRUE	reported	textfile	5606	TRUE	0.00393227	22.1235	25.1309
	rs80205778	A	G	A	G	0.467453	-0.0243	0.00948461	0.9901	FALSE	FALSE	FALSE	GVY4Ce	61173072	0.840582	0.120806	TRUE	reported	textfile	0.0945412	7.63638e-07	TRUE	reported	textfile	5606	TRUE	0.00434201	24.4387	25.1309
	rs8084246	A	G	A	G	0.101796	0.0493323	0.281514	0.803113	FALSE	FALSE	FALSE	GVY4Ce	11772231	0.0953828	0.0295817	TRUE	reported	textfile	0.02024	4.91927e-07	TRUE	reported	textfile	5606	TRUE	0.00449192	25.2863	25.1309
	rs9981625	C	G	C	G	-0.0899526	-0.0200422	0.372672	0.307264	FALSE	TRUE	FALSE	GVY4Ce	43355398	0.434551	0.0256482	TRUE	reported	textfile	0.0201886	8.36509e-06	TRUE	reported	textfile	5606	TRUE	0.0035288	19.8454	25.1309
GCST90199628	rs10014780	G	A	G	A	-0.0956574	-0.0237721	0.159583	0.845577	FALSE	FALSE	FALSE	GVY4Ce	66474932	0.470764	0.0329602	TRUE	reported	textfile	0.0209224	4.83094e-06	TRUE	reported	textfile	8289	TRUE	0.00251546	20.8982	21.3935
	rs10181994	T	A	T	A	0.0821837	-0.0348072	0.691427	0.727648	FALSE	TRUE	FALSE	GVY4Ce	126725507	0.184624	0.0262369	TRUE	reported	textfile	0.0169317	1.21096e-06	TRUE	reported	textfile	8289	TRUE	0.00283423	23.554	21.3935
	rs10966648	T	C	T	C	-0.0937684	-0.0181979	0.745054	0.19902	FALSE	FALSE	FALSE	GVY4Ce	2512056	0.535881	0.0293962	TRUE	reported	textfile	0.0178574	1.51321e-07	TRUE	reported	textfile	8289	TRUE	0.00331537	27.5659	21.3935
	rs114734560	T	C	T	C	-0.35764	0.0377759	0.0102702	0.976352	FALSE	FALSE	FALSE	GVY4Ce	33744394	0.637393	0.0801447	TRUE	reported	textfile	0.076823	3.23383e-06	TRUE	reported	textfile	8289	TRUE	0.0026078	21.6673	21.3935
	rs117090299	C	T	C	T	-0.295449	-0.0382361	0.0137094	0.992588	FALSE	FALSE	FALSE	GVY4Ce	86214632	0.781115	0.137606	TRUE	reported	textfile	0.0654447	6.34695e-06	TRUE	reported	textfile	8289	TRUE	0.00245272	20.3756	21.3935
	rs117771460	A	G	A	G	0.264482	0.0532386	0.0170496	0.985791	FALSE	FALSE	FALSE	GVY4Ce	39659519	0.580858	0.0964237	TRUE	reported	textfile	0.0597176	9.47246e-06	TRUE	reported	textfile	8289	TRUE	0.0023608	19.6102	21.3935
	rs11872731	A	G	A	G	0.135492	-0.000457373	0.0719668	0.93547	FALSE	FALSE	FALSE	GVY4Ce	4592009	0.992464	0.0484251	TRUE	reported	textfile	0.0304621	8.67197e-06	TRUE	reported	textfile	8289	TRUE	0.00238106	19.7789	21.3935
	rs12138831	T	G	T	G	-0.223214	0.149321	0.0257563	0.989944	FALSE	FALSE	FALSE	GVY4Ce	78644960	0.21437	0.120262	TRUE	reported	textfile	0.0486608	4.4935e-06	TRUE	reported	textfile	8289	TRUE	0.0025321	21.0368	21.3935
	rs12553086	G	T	G	T	0.14967	0.0119544	0.0669778	0.902389	FALSE	FALSE	FALSE	GVY4Ce	131750885	0.76504	0.039999	TRUE	reported	textfile	0.0307172	1.1018e-06	TRUE	reported	textfile	8289	TRUE	0.00285602	23.7357	21.3935
	rs13234372	A	G	A	G	-0.0821865	-0.0289951	0.309524	0.719614	FALSE	FALSE	FALSE	GVY4Ce	110247043	0.268075	0.0261806	TRUE	reported	textfile	0.0166991	8.58358e-07	TRUE	reported	textfile	8289	TRUE	0.0029137	24.2164	21.3935
	rs138750865	T	C	T	C	0.229043	-0.0233813	0.0259304	0.980172	FALSE	FALSE	FALSE	GVY4Ce	40182613	0.779712	0.0835961	TRUE	reported	textfile	0.0483745	2.19298e-06	TRUE	reported	textfile	8289	TRUE	0.00269728	22.4128	21.3935
	rs146846950	A	G	A	G	-0.535769	-0.0425671	0.00404492	0.973763	FALSE	FALSE	FALSE	GVY4Ce	113457137	0.571529	0.0752333	TRUE	reported	textfile	0.120898	9.35434e-06	TRUE	reported	textfile	8289	TRUE	0.00236367	19.6342	21.3935
	rs149807477	T	C	T	C	-0.26129	0.254247	0.0171107	0.997761	FALSE	FALSE	FALSE	GVY4Ce	32596526	0.356454	0.275713	TRUE	reported	textfile	0.0590671	9.70658e-06	TRUE	reported	textfile	8289	TRUE	0.0023552	19.5636	21.3935
	rs17670800	A	G	A	G	0.0880673	-0.00570267	0.205669	0.87724	FALSE	FALSE	FALSE	GVY4Ce	69901423	0.873677	0.0358681	TRUE	reported	textfile	0.0190393	3.73616e-06	TRUE	reported	textfile	8289	TRUE	0.00257458	21.3906	21.3935
	rs185076690	T	C	T	C	0.211694	0.10186	0.0259039	0.993423	FALSE	FALSE	FALSE	GVY4Ce	142733050	0.464959	0.139399	TRUE	reported	textfile	0.0478147	9.53817e-06	TRUE	reported	textfile	8289	TRUE	0.00235921	19.597	21.3935
	rs1857803	C	T	C	T	-0.0823134	0.0307712	0.265217	0.788276	FALSE	FALSE	FALSE	GVY4Ce	102634283	0.285099	0.0287868	TRUE	reported	textfile	0.017447	2.38263e-06	TRUE	reported	textfile	8289	TRUE	0.00267814	22.2533	21.3935
	rs2518573	G	T	G	T	0.0801615	0.0503504	0.738791	0.182873	FALSE	FALSE	FALSE	GVY4Ce	53134058	0.0984691	0.0304726	TRUE	reported	textfile	0.017558	4.98237e-06	TRUE	reported	textfile	8289	TRUE	0.00250835	20.839	21.3935
	rs2797978	C	T	C	T	0.120013	0.0121234	0.0929542	0.91291	FALSE	FALSE	FALSE	GVY4Ce	101465337	0.772426	0.0419201	TRUE	reported	textfile	0.0263768	5.36565e-06	TRUE	reported	textfile	8289	TRUE	0.00249131	20.697	21.3935
	rs4142196	A	C	A	C	-0.0772398	-0.0205248	0.739059	0.271769	FALSE	FALSE	FALSE	GVY4Ce	76692299	0.434549	0.0262657	TRUE	reported	textfile	0.0173893	8.92094e-06	TRUE	reported	textfile	8289	TRUE	0.00237456	19.7248	21.3935
	rs72879030	C	G	C	G	-0.116576	0.0235868	0.106939	0.124282	FALSE	TRUE	FALSE	GVY4Ce	47207061	0.506624	0.0355168	TRUE	reported	textfile	0.0252142	3.77474e-06	TRUE	reported	textfile	8289	TRUE	0.00257221	21.3709	21.3935
	rs72997812	A	G	A	G	0.0913382	0.00672224	0.174747	0.835848	FALSE	FALSE	FALSE	GVY4Ce	112790715	0.831367	0.0315674	TRUE	reported	textfile	0.0202172	6.24738e-06	TRUE	reported	textfile	8289	TRUE	0.00245636	20.406	21.3935
	rs73035811	A	G	A	G	0.121144	-0.0519282	0.0916234	0.979682	FALSE	FALSE	FALSE	GVY4Ce	15056914	0.540584	0.0848598	TRUE	reported	textfile	0.0268809	6.58475e-06	TRUE	reported	textfile	8289	TRUE	0.00244428	20.3054	21.3935
	rs7516441	A	G	A	G	0.109101	0.0580225	0.117381	0.929176	FALSE	FALSE	FALSE	GVY4Ce	59674575	0.20669	0.0459504	TRUE	reported	textfile	0.0246539	9.63078e-06	TRUE	reported	textfile	8289	TRUE	0.002357	19.5786	21.3935
	rs75256283	A	T	A	T	0.156459	-0.0448985	0.0592049	0.0444357	FALSE	TRUE	FALSE	GVY4Ce	113333758	0.444999	0.0587846	TRUE	reported	textfile	0.0328215	1.87007e-06	TRUE	reported	textfile	8289	TRUE	0.00273397	22.7185	21.3935
	rs752834	A	G	A	G	0.0925549	0.0463233	0.194184	0.836231	FALSE	FALSE	FALSE	GVY4Ce	111041081	0.144345	0.0317327	TRUE	reported	textfile	0.0194528	1.95589e-06	TRUE	reported	textfile	8289	TRUE	0.00272363	22.6324	21.3935
	rs75782963	A	G	A	G	0.209933	-0.0303005	0.0271103	0.987971	FALSE	FALSE	FALSE	GVY4Ce	77448309	0.776782	0.106874	TRUE	reported	textfile	0.0472735	8.96138e-06	TRUE	reported	textfile	8289	TRUE	0.00237351	19.7161	21.3935
	rs7746774	G	A	G	A	-0.10469	0.00449733	0.144171	0.899093	FALSE	FALSE	FALSE	GVY4Ce	139030342	0.91009	0.0398257	TRUE	reported	textfile	0.021704	1.41037e-06	TRUE	reported	textfile	8289	TRUE	0.00279905	23.2609	21.3935
	rs9910668	C	A	C	A	0.0739981	0.00891405	0.675224	0.332392	FALSE	FALSE	FALSE	GVY4Ce	80083264	0.72042	0.0249067	TRUE	reported	textfile	0.0163504	6.01742e-06	TRUE	reported	textfile	8289	TRUE	0.00246496	20.4776	21.3935
GCST90199629	rs10816075	T	C	T	C	0.0973711	0.00555104	0.164771	0.77435	FALSE	FALSE	FALSE	GVY4Ce	9247320	0.843342	0.0280893	TRUE	reported	textfile	0.0205632	2.18817e-06	TRUE	reported	textfile	8212	TRUE	0.00272299	22.4168	21.7984
	rs112211203	T	G	T	G	0.234246	0.0949442	0.0220984	0.986536	FALSE	FALSE	FALSE	GVY4Ce	56528571	0.353967	0.10243	TRUE	reported	textfile	0.0515822	5.59308e-06	TRUE	reported	textfile	8212	TRUE	0.00250499	20.6176	21.7984
	rs112779076	C	T	C	T	0.15285	-0.0426533	0.0536218	0.915981	FALSE	FALSE	FALSE	GVY4Ce	166358699	0.318544	0.0427622	TRUE	reported	textfile	0.0344046	8.88357e-06	TRUE	reported	textfile	8212	TRUE	0.00239776	19.733	21.7984
	rs116900994	T	C	T	C	0.163415	-0.0248088	0.0468293	0.965461	FALSE	FALSE	FALSE	GVY4Ce	78358881	0.703195	0.0651132	TRUE	reported	textfile	0.036324	6.83363e-06	TRUE	reported	textfile	8212	TRUE	0.00245855	20.2344	21.7984
	rs117568432	T	G	T	G	0.114159	0.0380221	0.0959356	0.945099	FALSE	FALSE	FALSE	GVY4Ce	65891098	0.463117	0.0518207	TRUE	reported	textfile	0.0257192	9.05148e-06	TRUE	reported	textfile	8212	TRUE	0.0023934	19.697	21.7984
	rs117605274	G	A	G	A	0.325951	0.025445	0.0127869	0.953665	FALSE	FALSE	FALSE	GVY4Ce	74687404	0.66579	0.0589094	TRUE	reported	textfile	0.0691481	2.43119e-06	TRUE	reported	textfile	8212	TRUE	0.0026985	22.2146	21.7984
	rs11773889	T	C	T	C	-0.0874834	0.0218202	0.221719	0.858916	FALSE	FALSE	FALSE	GVY4Ce	36298980	0.515447	0.0335499	TRUE	reported	textfile	0.0185441	2.38644e-06	TRUE	reported	textfile	8212	TRUE	0.00270281	22.2502	21.7984
	rs117793976	C	G	C	G	-0.352368	-0.0727364	0.0095729	0.00750011	FALSE	TRUE	FALSE	GVY4Ce	75108106	0.606693	0.141291	TRUE	reported	textfile	0.0785058	7.17504e-06	TRUE	reported	textfile	8212	TRUE	0.00244724	20.1411	21.7984
	rs11783515	G	A	G	A	-0.0742076	0.0203542	0.676129	0.378062	FALSE	FALSE	FALSE	GVY4Ce	58407830	0.40221	0.0242983	TRUE	reported	textfile	0.0165155	7.01584e-06	TRUE	reported	textfile	8212	TRUE	0.00245244	20.184	21.7984
	rs12800817	A	G	A	G	0.192118	-0.0664628	0.0394753	0.983897	FALSE	FALSE	FALSE	GVY4Ce	94286856	0.475278	0.0930961	TRUE	reported	textfile	0.0392089	9.59083e-07	TRUE	reported	textfile	8212	TRUE	0.00291508	24.0028	21.7984
	rs141866706	C	T	C	T	-0.348062	0.0524172	0.0108575	0.985413	FALSE	FALSE	FALSE	GVY4Ce	73791661	0.592861	0.0980321	TRUE	reported	textfile	0.0740522	2.59877e-06	TRUE	reported	textfile	8212	TRUE	0.00268301	22.0867	21.7984
	rs143156137	T	C	T	C	0.270431	0.274839	0.0166342	0.991856	FALSE	FALSE	FALSE	GVY4Ce	182722675	0.0367435	0.13159	TRUE	reported	textfile	0.059272	5.05379e-06	TRUE	reported	textfile	8212	TRUE	0.00252851	20.8117	21.7984
	rs149395329	C	T	C	T	0.186141	-0.0193546	0.035363	0.971172	FALSE	FALSE	FALSE	GVY4Ce	44518480	0.785686	0.0711786	TRUE	reported	textfile	0.0419148	8.95637e-06	TRUE	reported	textfile	8212	TRUE	0.00239584	19.7171	21.7984
	rs16973477	G	A	G	A	0.0952092	-0.0601144	0.151329	0.793829	FALSE	FALSE	FALSE	GVY4Ce	71853478	0.0383557	0.0290263	TRUE	reported	textfile	0.0213323	8.07672e-06	TRUE	reported	textfile	8212	TRUE	0.00241981	19.9148	21.7984
	rs192566258	A	T	A	T	-0.339794	-0.027221	0.0104651	0.00346259	FALSE	TRUE	FALSE	GVY4Ce	54022678	0.89629	0.20883	TRUE	reported	textfile	0.0755404	6.85374e-06	TRUE	reported	textfile	8212	TRUE	0.00245785	20.2287	21.7984
	rs2015026	C	T	C	T	-0.0725261	-0.0343772	0.372436	0.612055	FALSE	FALSE	FALSE	GVY4Ce	95999826	0.156421	0.0242569	TRUE	reported	textfile	0.0160143	5.93109e-06	TRUE	reported	textfile	8212	TRUE	0.00249138	20.5053	21.7984
	rs28631199	A	G	A	G	0.0807118	-0.04717	0.24412	0.73293	FALSE	FALSE	FALSE	GVY4Ce	954724	0.0752818	0.0265188	TRUE	reported	textfile	0.0179643	7.02641e-06	TRUE	reported	textfile	8212	TRUE	0.0024521	20.1812	21.7984
	rs3738976	T	C	T	C	-0.0972846	0.0524879	0.151338	0.824263	FALSE	FALSE	FALSE	GVY4Ce	44931099	0.0904045	0.030998	TRUE	reported	textfile	0.0213799	5.35738e-06	TRUE	reported	textfile	8212	TRUE	0.00251498	20.7	21.7984
	rs4715365	T	C	T	C	0.16235	-0.065676	0.0518449	0.94089	FALSE	FALSE	FALSE	GVY4Ce	52926962	0.190595	0.0501795	TRUE	reported	textfile	0.0350163	3.5449e-06	TRUE	reported	textfile	8212	TRUE	0.00261084	21.4911	21.7984
	rs4980965	C	T	C	T	0.0708155	0.0207123	0.448602	0.568543	FALSE	FALSE	FALSE	GVY4Ce	724252	0.385125	0.0238486	TRUE	reported	textfile	0.0158191	7.58431e-06	TRUE	reported	textfile	8212	TRUE	0.00243436	20.0349	21.7984
	rs557700	C	T	C	T	0.0756793	0.00686548	0.705143	0.306819	FALSE	FALSE	FALSE	GVY4Ce	47790829	0.788691	0.0256164	TRUE	reported	textfile	0.016833	6.92818e-06	TRUE	reported	textfile	8212	TRUE	0.00245536	20.2081	21.7984
	rs665474	T	A	T	A	0.0744593	-0.00648461	0.281624	0.385171	FALSE	TRUE	FALSE	GVY4Ce	29415783	0.788023	0.0241173	TRUE	reported	textfile	0.0168561	9.99158e-06	TRUE	reported	textfile	8212	TRUE	0.00237052	19.5082	21.7984
	rs6981994	C	T	C	T	0.271135	-0.00517135	0.0174872	0.969484	FALSE	FALSE	FALSE	GVY4Ce	134660962	0.940714	0.0695325	TRUE	reported	textfile	0.0585165	3.59568e-06	TRUE	reported	textfile	8212	TRUE	0.00260754	21.4639	21.7984
	rs72803677	T	G	T	G	-0.301878	-0.0230179	0.0142254	0.964859	FALSE	FALSE	FALSE	GVY4Ce	53774515	0.724538	0.0653175	TRUE	reported	textfile	0.0649424	3.34525e-06	TRUE	reported	textfile	8212	TRUE	0.00262432	21.6023	21.7984
	rs74420163	T	C	T	C	0.18549	0.0465296	0.0368812	0.955371	FALSE	FALSE	FALSE	GVY4Ce	19053740	0.417841	0.0574317	TRUE	reported	textfile	0.0409257	5.8326e-06	TRUE	reported	textfile	8212	TRUE	0.00249525	20.5373	21.7984
	rs74814187	T	C	T	C	0.158928	-0.0680132	0.0546213	0.940323	FALSE	FALSE	FALSE	GVY4Ce	177105662	0.17203	0.0498006	TRUE	reported	textfile	0.0336247	2.28402e-06	TRUE	reported	textfile	8212	TRUE	0.00271303	22.3346	21.7984
	rs75158623	A	T	A	T	0.144058	0.0529087	0.0607305	0.0620195	FALSE	TRUE	FALSE	GVY4Ce	2655900	0.284638	0.0494493	TRUE	reported	textfile	0.0320058	6.76327e-06	TRUE	reported	textfile	8212	TRUE	0.00246092	20.254	21.7984
	rs75275697	A	G	A	G	0.269422	0.241844	0.0162096	0.996181	FALSE	FALSE	FALSE	GVY4Ce	39774970	0.189825	0.184459	TRUE	reported	textfile	0.060459	8.3392e-06	TRUE	reported	textfile	8212	TRUE	0.00241238	19.8536	21.7984
	rs77692382	T	C	T	C	0.124343	0.0100602	0.249324	0.799259	FALSE	FALSE	FALSE	GVY4Ce	39941043	0.733476	0.0295448	TRUE	reported	textfile	0.0177226	2.28252e-12	TRUE	reported	textfile	8212	TRUE	0.00595859	49.2132	21.7984
	rs8064391	G	A	G	A	-0.291489	0.0784328	0.984318	0.006532	FALSE	FALSE	FALSE	GVY4Ce	81411346	0.597039	0.148361	TRUE	reported	textfile	0.0626721	3.303e-06	TRUE	reported	textfile	8212	TRUE	0.00262727	21.6267	21.7984
	rs9487777	C	G	C	G	-0.273645	0.0211943	0.0187874	0.0373718	FALSE	TRUE	FALSE	GVY4Ce	111985317	0.7329	0.062104	TRUE	reported	textfile	0.0563802	1.21261e-06	TRUE	reported	textfile	8212	TRUE	0.00286041	23.5514	21.7984
	rs9510701	T	C	T	C	0.173788	0.0306354	0.040562	0.969642	FALSE	FALSE	FALSE	GVY4Ce	23324554	0.66133	0.0699314	TRUE	reported	textfile	0.0386321	6.84247e-06	TRUE	reported	textfile	8212	TRUE	0.00245824	20.2319	21.7984
GCST90199630	rs1057157	C	T	C	T	0.0763559	-0.028287	0.356179	0.664671	FALSE	FALSE	FALSE	GVY4Ce	42383012	0.256988	0.0249546	TRUE	reported	textfile	0.0171254	8.24826e-06	TRUE	reported	textfile	7059	TRUE	0.00280827	19.8738	23.6778
	rs112192402	A	G	A	G	0.227703	-0.0831441	0.0311454	0.978886	FALSE	FALSE	FALSE	GVY4Ce	68449464	0.316634	0.083028	TRUE	reported	textfile	0.0474027	1.55855e-06	TRUE	reported	textfile	7059	TRUE	0.00325815	23.0679	23.6778
	rs117291585	T	C	T	C	0.241913	-0.0238601	0.0241775	0.97825	FALSE	FALSE	FALSE	GVY4Ce	60269481	0.764631	0.0796918	TRUE	reported	textfile	0.052514	4.09221e-06	TRUE	reported	textfile	7059	TRUE	0.00299724	21.2151	23.6778
	rs145721291	T	C	T	C	0.453464	-0.181769	0.00662204	0.998188	FALSE	FALSE	FALSE	GVY4Ce	149241086	0.5036	0.271769	TRUE	reported	textfile	0.100866	6.93429e-06	TRUE	reported	textfile	7059	TRUE	0.00285503	20.2057	23.6778
	rs148515684	A	G	A	G	0.329495	-0.0487625	0.0138573	0.9668	FALSE	FALSE	FALSE	GVY4Ce	32806391	0.469397	0.0674018	TRUE	reported	textfile	0.0697969	2.34952e-06	TRUE	reported	textfile	7059	TRUE	0.00314712	22.2793	23.6778
	rs150248294	A	G	A	G	-0.377677	-0.00146548	0.0102142	0.973128	FALSE	FALSE	FALSE	GVY4Ce	56853738	0.984174	0.07388	TRUE	reported	textfile	0.080216	2.49851e-06	TRUE	reported	textfile	7059	TRUE	0.0031305	22.1613	23.6778
	rs1604572	G	C	G	C	-0.0886552	-0.0218149	0.317746	0.252907	FALSE	TRUE	FALSE	GVY4Ce	131672868	0.42064	0.0270888	TRUE	reported	textfile	0.0174741	3.90507e-07	TRUE	reported	textfile	7059	TRUE	0.00363325	25.7333	23.6778
	rs16943430	A	G	A	G	-0.199229	-0.0859171	0.034759	0.981088	FALSE	FALSE	FALSE	GVY4Ce	27277604	0.305599	0.0838625	TRUE	reported	textfile	0.0444659	7.44695e-06	TRUE	reported	textfile	7059	TRUE	0.00283579	20.0691	23.6778
	rs180982609	C	T	C	T	-0.500304	-0.157241	0.0051231	0.96297	FALSE	FALSE	FALSE	GVY4Ce	90966386	0.0119608	0.0625637	TRUE	reported	textfile	0.112894	9.35214e-06	TRUE	reported	textfile	7059	TRUE	0.00277445	19.6337	23.6778
	rs188124348	C	T	C	T	0.358611	-0.207046	0.0125871	0.981684	FALSE	FALSE	FALSE	GVY4Ce	80540228	0.0199177	0.0889411	TRUE	reported	textfile	0.0731176	9.36257e-07	TRUE	reported	textfile	7059	TRUE	0.00339612	24.0481	23.6778
	rs189587	A	G	A	G	0.0806004	-0.0332769	0.432367	0.542194	FALSE	FALSE	FALSE	GVY4Ce	77578931	0.159207	0.0236385	TRUE	reported	textfile	0.0164433	9.50008e-07	TRUE	reported	textfile	7059	TRUE	0.00339217	24.02	23.6778
	rs2632709	C	A	C	A	0.104046	-0.0442185	0.148365	0.845209	FALSE	FALSE	FALSE	GVY4Ce	42371565	0.177971	0.0328267	TRUE	reported	textfile	0.0228286	5.17192e-06	TRUE	reported	textfile	7059	TRUE	0.00293409	20.7668	23.6778
	rs3809205	C	T	C	T	0.182025	0.0694096	0.0434628	0.981797	FALSE	FALSE	FALSE	GVY4Ce	22044817	0.438977	0.0896856	TRUE	reported	textfile	0.0399238	5.13238e-06	TRUE	reported	textfile	7059	TRUE	0.00293615	20.7814	23.6778
	rs3856733	G	C	G	C	-0.0881978	0.000186237	0.300579	0.262409	FALSE	TRUE	FALSE	GVY4Ce	42106201	0.994481	0.0269221	TRUE	reported	textfile	0.0180229	9.89884e-07	TRUE	reported	textfile	7059	TRUE	0.00338105	23.941	23.6778
	rs59532339	T	A	T	A	0.461097	0.035203	0.0235728	0.0163584	FALSE	TRUE	FALSE	GVY4Ce	20568350	0.704706	0.0928898	TRUE	reported	textfile	0.0539542	1.2734e-17	TRUE	reported	textfile	7059	TRUE	0.0102405	73.0148	23.6778
	rs6566598	C	T	C	T	-0.206029	-0.108214	0.966004	0.022342	FALSE	FALSE	FALSE	GVY4Ce	72270169	0.179405	0.0806012	TRUE	reported	textfile	0.0456208	6.2986e-06	TRUE	reported	textfile	7059	TRUE	0.00288094	20.3896	23.6778
	rs7196912	T	C	T	C	0.225688	0.0947882	0.0315558	0.94905	FALSE	FALSE	FALSE	GVY4Ce	20589290	0.0745058	0.0531474	TRUE	reported	textfile	0.0462149	1.04254e-06	TRUE	reported	textfile	7059	TRUE	0.00336701	23.8413	23.6778
	rs72825080	C	T	C	T	-0.15323	-0.0297267	0.0592908	0.894003	FALSE	FALSE	FALSE	GVY4Ce	101434829	0.439896	0.0384877	TRUE	reported	textfile	0.0342299	7.58803e-06	TRUE	reported	textfile	7059	TRUE	0.00283075	20.0333	23.6778
	rs73057725	A	G	A	G	0.222167	0.175984	0.0350404	0.9704	FALSE	FALSE	FALSE	GVY4Ce	5394476	0.0121294	0.0701592	TRUE	reported	textfile	0.0444899	5.92485e-07	TRUE	reported	textfile	7059	TRUE	0.00352015	24.9295	23.6778
	rs7526830	C	T	C	T	0.11933	0.111952	0.113773	0.870607	FALSE	FALSE	FALSE	GVY4Ce	168675145	0.0017684	0.0358064	TRUE	reported	textfile	0.0256291	3.22345e-06	TRUE	reported	textfile	7059	TRUE	0.00306167	21.6725	23.6778
	rs76151544	G	A	G	A	-0.249151	0.0516426	0.0227109	0.983505	FALSE	FALSE	FALSE	GVY4Ce	15762235	0.58477	0.0945091	TRUE	reported	textfile	0.0549946	5.88542e-06	TRUE	reported	textfile	7059	TRUE	0.00289922	20.5193	23.6778
	rs76318294	G	T	G	T	-0.131138	-0.0472398	0.084973	0.910786	FALSE	FALSE	FALSE	GVY4Ce	230418611	0.252189	0.0412557	TRUE	reported	textfile	0.029682	9.95725e-06	TRUE	reported	textfile	7059	TRUE	0.00275758	19.5141	23.6778
	rs76379382	T	C	T	C	-0.160195	-0.0702345	0.054898	0.923778	FALSE	FALSE	FALSE	GVY4Ce	64997213	0.118646	0.0450082	TRUE	reported	textfile	0.0358753	7.99391e-06	TRUE	reported	textfile	7059	TRUE	0.00281669	19.9335	23.6778
	rs76447789	G	A	G	A	-0.443571	0.18096	0.00680658	0.993859	FALSE	FALSE	FALSE	GVY4Ce	25420254	0.232423	0.15154	TRUE	reported	textfile	0.0992982	7.93008e-06	TRUE	reported	textfile	7059	TRUE	0.00281887	19.949	23.6778
	rs78580580	C	A	C	A	-0.294915	0.244721	0.017728	0.994704	FALSE	FALSE	FALSE	GVY4Ce	104450374	0.159415	0.173926	TRUE	reported	textfile	0.0614523	1.59391e-06	TRUE	reported	textfile	7059	TRUE	0.00325207	23.0247	23.6778
	rs8001043	C	T	C	T	-0.0811984	0.00512012	0.693867	0.432926	FALSE	FALSE	FALSE	GVY4Ce	34753839	0.830186	0.0238741	TRUE	reported	textfile	0.0177149	4.57013e-06	TRUE	reported	textfile	7059	TRUE	0.00296745	21.0036	23.6778
GCST90199631	rs116943713	G	A	G	A	0.209966	0.0137256	0.0274457	0.973869	FALSE	FALSE	FALSE	GVY4Ce	28618182	0.848934	0.0720586	TRUE	reported	textfile	0.0460722	5.18093e-06	TRUE	reported	textfile	8257	TRUE	0.00250904	20.7642	22.4691
	rs11791075	T	A	T	A	-0.0841116	0.0340584	0.752536	0.829103	FALSE	TRUE	FALSE	GVY4Ce	83720430	0.278981	0.0314595	TRUE	reported	textfile	0.0179331	2.72804e-06	TRUE	reported	textfile	8257	TRUE	0.00265719	21.9936	22.4691
	rs12716450	T	C	T	C	0.295968	-0.0996206	0.0128564	0.982577	FALSE	FALSE	FALSE	GVY4Ce	93478693	0.271451	0.0905867	TRUE	reported	textfile	0.065473	6.17051e-06	TRUE	reported	textfile	8257	TRUE	0.00246871	20.4296	22.4691
	rs142174598	C	G	C	G	-0.420915	0.370344	0.00644455	0.00274805	FALSE	TRUE	FALSE	GVY4Ce	34165541	0.0768316	0.209308	TRUE	reported	textfile	0.0935419	6.80344e-06	TRUE	reported	textfile	8257	TRUE	0.00244619	20.2428	22.4691
	rs142461926	G	A	G	A	-0.220081	0.143168	0.026332	0.991792	FALSE	FALSE	FALSE	GVY4Ce	25575454	0.273218	0.130666	TRUE	reported	textfile	0.0468793	2.67075e-06	TRUE	reported	textfile	8257	TRUE	0.00266209	22.0342	22.4691
	rs145992024	T	C	T	C	-0.347476	-0.139599	0.0102986	0.997878	FALSE	FALSE	FALSE	GVY4Ce	24284993	0.601438	0.26726	TRUE	reported	textfile	0.0734813	2.2589e-06	TRUE	reported	textfile	8257	TRUE	0.00270084	22.3558	22.4691
	rs183718435	A	C	A	C	-0.411296	0.308371	0.0067402	0.998517	FALSE	FALSE	FALSE	GVY4Ce	14739182	0.333083	0.318591	TRUE	reported	textfile	0.091854	7.54471e-06	TRUE	reported	textfile	8257	TRUE	0.00242235	20.0451	22.4691
	rs34372879	C	T	C	T	-0.0947061	0.0110186	0.148723	0.865374	FALSE	FALSE	FALSE	GVY4Ce	41524417	0.750214	0.0346106	TRUE	reported	textfile	0.0213272	8.96987e-06	TRUE	reported	textfile	8257	TRUE	0.00238248	19.7144	22.4691
	rs56107485	C	A	C	A	-0.154962	0.0826198	0.0606153	0.968535	FALSE	FALSE	FALSE	GVY4Ce	156517427	0.225166	0.0681173	TRUE	reported	textfile	0.0310005	5.77179e-07	TRUE	reported	textfile	8257	TRUE	0.00301702	24.9809	22.4691
	rs58693102	A	G	A	G	-0.187799	-0.0911033	0.0331267	0.960024	FALSE	FALSE	FALSE	GVY4Ce	40394897	0.120697	0.058706	TRUE	reported	textfile	0.0414491	5.87507e-06	TRUE	reported	textfile	8257	TRUE	0.00248002	20.5235	22.4691
	rs58729469	T	C	T	C	0.101193	0.00595228	0.159259	0.84345	FALSE	FALSE	FALSE	GVY4Ce	36050283	0.855337	0.0326487	TRUE	reported	textfile	0.0201862	5.35894e-07	TRUE	reported	textfile	8257	TRUE	0.00303424	25.1239	22.4691
	rs6055350	C	G	C	G	-0.215685	0.0892997	0.962906	0.988122	FALSE	TRUE	FALSE	GVY4Ce	858872	0.413519	0.109206	TRUE	reported	textfile	0.0396894	5.50013e-08	TRUE	reported	textfile	8257	TRUE	0.00356384	29.5247	22.4691
	rs62524533	A	G	A	G	-0.110404	0.00489447	0.101178	0.927169	FALSE	FALSE	FALSE	GVY4Ce	134040089	0.913216	0.0449105	TRUE	reported	textfile	0.0244676	6.41459e-06	TRUE	reported	textfile	8257	TRUE	0.00245977	20.3555	22.4691
	rs6754181	C	T	C	T	0.0910083	0.0194326	0.840543	0.225693	FALSE	FALSE	FALSE	GVY4Ce	29743514	0.490376	0.028175	TRUE	reported	textfile	0.0204779	8.82143e-06	TRUE	reported	textfile	8257	TRUE	0.00238633	19.7463	22.4691
	rs7660693	C	T	C	T	0.0791272	-0.000971652	0.497027	0.54257	FALSE	FALSE	FALSE	GVY4Ce	88307231	0.967642	0.0239523	TRUE	reported	textfile	0.0148481	9.86958e-08	TRUE	reported	textfile	8257	TRUE	0.00342765	28.3926	22.4691
	rs77291466	C	T	C	T	-0.12259	0.0289396	0.0806922	0.94732	FALSE	FALSE	FALSE	GVY4Ce	60325998	0.582357	0.0526228	TRUE	reported	textfile	0.0272328	6.74582e-06	TRUE	reported	textfile	8257	TRUE	0.00244815	20.2591	22.4691
	rs77876488	T	C	T	C	-0.177185	0.0325653	0.0472576	0.938409	FALSE	FALSE	FALSE	GVY4Ce	10810833	0.509035	0.049316	TRUE	reported	textfile	0.0350913	4.43549e-07	TRUE	reported	textfile	8257	TRUE	0.00307818	25.4888	22.4691
GCST90199632	rs10004542	G	A	G	A	0.0814848	0.00932777	0.340258	0.692293	FALSE	FALSE	FALSE	GVY4Ce	4718728	0.715557	0.0255974	TRUE	reported	textfile	0.0176888	4.09376e-06	TRUE	reported	textfile	7099	TRUE	0.00298032	21.2146	21.3401
	rs10247649	G	A	G	A	-0.0826258	0.0102012	0.344838	0.689387	FALSE	FALSE	FALSE	GVY4Ce	95586935	0.689419	0.0255256	TRUE	reported	textfile	0.0178465	3.65988e-06	TRUE	reported	textfile	7099	TRUE	0.00301036	21.429	21.3401
	rs10945808	T	C	T	C	-0.130904	-0.0189561	0.0976838	0.921308	FALSE	FALSE	FALSE	GVY4Ce	162299162	0.665077	0.0437871	TRUE	reported	textfile	0.0285309	4.47212e-06	TRUE	reported	textfile	7099	TRUE	0.00295659	21.0452	21.3401
	rs115272033	C	T	C	T	-0.170179	-0.0664797	0.0492451	0.944934	FALSE	FALSE	FALSE	GVY4Ce	31883030	0.198573	0.05171	TRUE	reported	textfile	0.0381431	8.13534e-06	TRUE	reported	textfile	7099	TRUE	0.00279619	19.9002	21.3401
	rs116626434	A	G	A	G	-0.149526	-0.0166105	0.0721524	0.909442	FALSE	FALSE	FALSE	GVY4Ce	83175694	0.684998	0.0409475	TRUE	reported	textfile	0.0320676	3.11891e-06	TRUE	reported	textfile	7099	TRUE	0.00305334	21.7359	21.3401
	rs117483011	A	G	A	G	-0.157832	-0.0265647	0.0595121	0.931364	FALSE	FALSE	FALSE	GVY4Ce	3339388	0.575188	0.0474007	TRUE	reported	textfile	0.0354548	8.52127e-06	TRUE	reported	textfile	7099	TRUE	0.00278376	19.8115	21.3401
	rs13089230	A	G	A	G	0.0825424	0.0193308	0.621953	0.393626	FALSE	FALSE	FALSE	GVY4Ce	177836416	0.425293	0.0242462	TRUE	reported	textfile	0.0175787	2.65821e-06	TRUE	reported	textfile	7099	TRUE	0.00309626	22.0424	21.3401
	rs138430505	C	T	C	T	0.285026	-0.0560943	0.0178748	0.984772	FALSE	FALSE	FALSE	GVY4Ce	25955752	0.557172	0.095553	TRUE	reported	textfile	0.0624394	4.9989e-06	TRUE	reported	textfile	7099	TRUE	0.00292672	20.8319	21.3401
	rs141660852	T	C	T	C	0.228649	0.121785	0.029224	0.990582	FALSE	FALSE	FALSE	GVY4Ce	62365105	0.338303	0.127187	TRUE	reported	textfile	0.0493121	3.53868e-06	TRUE	reported	textfile	7099	TRUE	0.0030194	21.4936	21.3401
	rs142959592	T	C	T	C	-0.373738	0.142871	0.0106022	0.988725	FALSE	FALSE	FALSE	GVY4Ce	77121326	0.196218	0.110547	TRUE	reported	textfile	0.0817952	4.89608e-06	TRUE	reported	textfile	7099	TRUE	0.00293229	20.8716	21.3401
	rs142997067	G	C	G	C	0.608221	0.348702	0.00388473	0.0056276	FALSE	TRUE	FALSE	GVY4Ce	70342880	0.0221294	0.152395	TRUE	reported	textfile	0.134166	5.80553e-06	TRUE	reported	textfile	7099	TRUE	0.00288659	20.5454	21.3401
	rs143000803	T	A	T	A	0.368352	0.0453714	0.0112878	0.0423731	FALSE	TRUE	FALSE	GVY4Ce	127307984	0.446085	0.0595458	TRUE	reported	textfile	0.0789907	3.11275e-06	TRUE	reported	textfile	7099	TRUE	0.00305386	21.7396	21.3401
	rs146593632	T	C	T	C	0.370018	0.06469	0.010688	0.995987	FALSE	FALSE	FALSE	GVY4Ce	22839328	0.736287	0.192087	TRUE	reported	textfile	0.0815327	5.67156e-06	TRUE	reported	textfile	7099	TRUE	0.00289286	20.5902	21.3401
	rs17026163	T	C	T	C	-0.223964	-0.0112289	0.032701	0.977623	FALSE	FALSE	FALSE	GVY4Ce	101829183	0.886127	0.0784103	TRUE	reported	textfile	0.0470413	1.92634e-06	TRUE	reported	textfile	7099	TRUE	0.00318285	22.6608	21.3401
	rs2468877	A	T	A	T	-0.0762559	0.00926914	0.56753	0.511544	FALSE	TRUE	TRUE	GVY4Ce	113913215	0.692746	0.0234583	TRUE	reported	textfile	0.0170977	8.19549e-06	TRUE	reported	textfile	7099	FALSE	0.00279421	19.8861	21.3401
	rs298392	T	C	T	C	0.087711	0.00363591	0.28972	0.68809	FALSE	FALSE	FALSE	GVY4Ce	74552072	0.886446	0.0254611	TRUE	reported	textfile	0.0186612	2.59941e-06	TRUE	reported	textfile	7099	TRUE	0.00310229	22.0855	21.3401
	rs540278823	C	T	C	T	-0.210344	-0.0589528	0.0322306	0.986183	FALSE	FALSE	FALSE	GVY4Ce	27170812	0.559245	0.100953	TRUE	reported	textfile	0.047106	7.99472e-06	TRUE	reported	textfile	7099	TRUE	0.00280087	19.9336	21.3401
	rs628038	C	T	C	T	-0.0783007	0.00778453	0.386617	0.641792	FALSE	FALSE	FALSE	GVY4Ce	73615534	0.751408	0.0245737	TRUE	reported	textfile	0.0170337	4.2902e-06	TRUE	reported	textfile	7099	TRUE	0.00296774	21.1247	21.3401
	rs75583177	G	A	G	A	-0.145169	0.0366318	0.0701345	0.957539	FALSE	FALSE	FALSE	GVY4Ce	139887135	0.534663	0.0589974	TRUE	reported	textfile	0.032432	7.60113e-06	TRUE	reported	textfile	7099	TRUE	0.00281436	20.0299	21.3401
	rs76501568	T	C	T	C	-0.267429	-0.0321318	0.02066	0.990211	FALSE	FALSE	FALSE	GVY4Ce	199095080	0.788312	0.11967	TRUE	reported	textfile	0.0587195	5.2548e-06	TRUE	reported	textfile	7099	TRUE	0.00291332	20.7362	21.3401
	rs77798428	A	G	A	G	-0.318661	-0.0409116	0.0184793	0.954415	FALSE	FALSE	FALSE	GVY4Ce	58376202	0.469006	0.0565001	TRUE	reported	textfile	0.0614021	2.10597e-07	TRUE	reported	textfile	7099	TRUE	0.00377963	26.9258	21.3401
	rs79983252	A	C	A	C	0.236427	0.190933	0.0301043	0.980466	FALSE	FALSE	FALSE	GVY4Ce	175616377	0.0224838	0.0836658	TRUE	reported	textfile	0.0486249	1.16058e-06	TRUE	reported	textfile	7099	TRUE	0.00331922	23.6349	21.3401
	rs9948951	A	G	A	G	-0.0971868	-0.0205033	0.184827	0.822739	FALSE	FALSE	FALSE	GVY4Ce	8592790	0.502111	0.0305485	TRUE	reported	textfile	0.0214343	5.78302e-06	TRUE	reported	textfile	7099	TRUE	0.00288764	20.5529	21.3401
GCST90199633	rs10008401	C	T	C	T	0.0800086	0.0131464	0.609542	0.379981	FALSE	FALSE	FALSE	GVY4Ce	116858781	0.587707	0.0242481	TRUE	reported	textfile	0.0170477	2.68944e-06	TRUE	reported	textfile	6902	TRUE	0.00318114	22.0199	21.3626
	rs11158833	G	A	G	A	-0.0922378	0.00203702	0.759084	0.243646	FALSE	FALSE	FALSE	GVY4Ce	70111694	0.940975	0.0275106	TRUE	reported	textfile	0.0196709	2.74475e-06	TRUE	reported	textfile	6902	TRUE	0.00317551	21.9808	21.3626
	rs11705994	T	C	T	C	0.218723	-0.0247558	0.0297142	0.923358	FALSE	FALSE	FALSE	GVY4Ce	73318930	0.58354	0.0451568	TRUE	reported	textfile	0.0493421	9.30183e-06	TRUE	reported	textfile	6902	TRUE	0.00283886	19.6439	21.3626
	rs117499033	G	A	G	A	0.30721	0.120126	0.0142545	0.984946	FALSE	FALSE	FALSE	GVY4Ce	44998209	0.218583	0.0976395	TRUE	reported	textfile	0.0691456	8.87382e-06	TRUE	reported	textfile	6902	TRUE	0.00285185	19.734	21.3626
	rs12555229	G	C	G	C	-0.0955533	0.0164258	0.250852	0.33478	FALSE	TRUE	FALSE	GVY4Ce	135788065	0.51332	0.0251283	TRUE	reported	textfile	0.0196317	1.13142e-06	TRUE	reported	textfile	6902	TRUE	0.00342068	23.6837	21.3626
	rs140580838	A	G	A	G	0.308493	-0.0183387	0.0145645	0.980224	FALSE	FALSE	FALSE	GVY4Ce	108977705	0.836117	0.0886519	TRUE	reported	textfile	0.0695392	9.15411e-06	TRUE	reported	textfile	6902	TRUE	0.00284328	19.6746	21.3626
	rs141183746	C	A	C	A	0.161019	0.0739288	0.0572184	0.931291	FALSE	FALSE	FALSE	GVY4Ce	163922203	0.114386	0.0468265	TRUE	reported	textfile	0.0364413	9.93437e-06	TRUE	reported	textfile	6902	TRUE	0.00282075	19.5182	21.3626
	rs145406199	A	G	A	G	0.37263	0.0219577	0.0101441	0.992968	FALSE	FALSE	FALSE	GVY4Ce	107260564	0.871746	0.13601	TRUE	reported	textfile	0.0837642	8.64482e-06	TRUE	reported	textfile	6902	TRUE	0.00285904	19.7839	21.3626
	rs146529314	G	T	G	T	0.336938	0.340278	0.0147642	0.997964	FALSE	FALSE	FALSE	GVY4Ce	106007929	0.193839	0.261892	TRUE	reported	textfile	0.0697181	1.34585e-06	TRUE	reported	textfile	6902	TRUE	0.00337261	23.3498	21.3626
	rs148863405	C	G	C	G	0.798698	-0.0462053	0.00217928	0.0309621	FALSE	TRUE	FALSE	GVY4Ce	16581529	0.505964	0.0694676	TRUE	reported	textfile	0.178207	7.40014e-06	TRUE	reported	textfile	6902	TRUE	0.00290187	20.0812	21.3626
	rs1551619	T	C	T	C	-0.0957862	-0.0390361	0.230903	0.85232	FALSE	FALSE	FALSE	GVY4Ce	75889724	0.233949	0.0327967	TRUE	reported	textfile	0.0197795	1.28083e-06	TRUE	reported	textfile	6902	TRUE	0.00338631	23.445	21.3626
	rs17738405	C	T	C	T	-0.193637	0.00384043	0.0453877	0.979186	FALSE	FALSE	FALSE	GVY4Ce	3235891	0.963693	0.0843672	TRUE	reported	textfile	0.0395206	9.60098e-07	TRUE	reported	textfile	6902	TRUE	0.00346615	23.9996	21.3626
	rs189725310	T	C	T	C	-0.167962	-0.00175261	0.0547126	0.948309	FALSE	FALSE	FALSE	GVY4Ce	208748506	0.974332	0.0544696	TRUE	reported	textfile	0.0363969	3.9362e-06	TRUE	reported	textfile	6902	TRUE	0.00307596	21.2896	21.3626
	rs191920017	A	G	A	G	-0.399312	0.0883144	0.00922782	0.998331	FALSE	FALSE	FALSE	GVY4Ce	22277644	0.761374	0.290816	TRUE	reported	textfile	0.0879247	5.58496e-06	TRUE	reported	textfile	6902	TRUE	0.00297942	20.6194	21.3626
	rs34357043	G	T	G	T	0.266628	-0.00182402	0.0233082	0.96121	FALSE	FALSE	FALSE	GVY4Ce	31925736	0.976017	0.0606735	TRUE	reported	textfile	0.0551228	1.31829e-06	TRUE	reported	textfile	6902	TRUE	0.00337835	23.3896	21.3626
	rs35904890	T	C	T	C	-0.227287	-0.0564568	0.0284364	0.979851	FALSE	FALSE	FALSE	GVY4Ce	8649229	0.501839	0.0840631	TRUE	reported	textfile	0.0499103	5.26594e-06	TRUE	reported	textfile	6902	TRUE	0.00299565	20.7321	21.3626
	rs4689177	T	C	T	C	0.108829	0.0163691	0.144896	0.856589	FALSE	FALSE	FALSE	GVY4Ce	4592747	0.626164	0.0336028	TRUE	reported	textfile	0.023723	4.48615e-06	TRUE	reported	textfile	6902	TRUE	0.00303986	21.039	21.3626
	rs4695288	T	C	T	C	0.200323	-0.00138624	0.965304	0.016543	FALSE	FALSE	FALSE	GVY4Ce	47852756	0.98786	0.0911069	TRUE	reported	textfile	0.0453191	9.85766e-06	TRUE	reported	textfile	6902	TRUE	0.00282291	19.5332	21.3626
	rs539316238	T	C	T	C	-0.273918	-0.0825048	0.0202821	0.966339	FALSE	FALSE	FALSE	GVY4Ce	18011466	0.201612	0.0646097	TRUE	reported	textfile	0.059083	3.54953e-06	TRUE	reported	textfile	6902	TRUE	0.00310449	21.4877	21.3626
	rs6914551	C	T	C	T	-0.366135	-0.0130817	0.011276	0.910056	FALSE	FALSE	FALSE	GVY4Ce	106686831	0.751593	0.0413272	TRUE	reported	textfile	0.0791195	3.69883e-06	TRUE	reported	textfile	6902	TRUE	0.00309311	21.4087	21.3626
	rs6923178	G	C	G	C	0.121756	0.00347429	0.119895	0.170457	FALSE	TRUE	FALSE	GVY4Ce	79684023	0.912071	0.0314623	TRUE	reported	textfile	0.025941	2.68478e-06	TRUE	reported	textfile	6902	TRUE	0.00318162	22.0233	21.3626
	rs72777931	A	G	A	G	0.336072	-0.0134027	0.0147465	0.964307	FALSE	FALSE	FALSE	GVY4Ce	23857673	0.834517	0.0641548	TRUE	reported	textfile	0.0690214	1.12109e-06	TRUE	reported	textfile	6902	TRUE	0.00342321	23.7013	21.3626
	rs7616744	A	G	A	G	-0.0876962	0.00541189	0.223816	0.689606	FALSE	FALSE	FALSE	GVY4Ce	24740196	0.83201	0.0255128	TRUE	reported	textfile	0.0198179	9.63944e-06	TRUE	reported	textfile	6902	TRUE	0.00282905	19.5758	21.3626
	rs78440527	G	A	G	A	0.199278	0.0380012	0.0359116	0.981065	FALSE	FALSE	FALSE	GVY4Ce	101864890	0.658569	0.0859967	TRUE	reported	textfile	0.0447114	8.31185e-06	TRUE	reported	textfile	6902	TRUE	0.00286985	19.859	21.3626
	rs848290	T	A	T	A	-0.165088	-0.0528848	0.068549	0.0453582	FALSE	TRUE	FALSE	GVY4Ce	58162047	0.35384	0.0570392	TRUE	reported	textfile	0.0330302	5.79013e-07	TRUE	reported	textfile	6902	TRUE	0.00360632	24.9737	21.3626
	rs9313297	G	A	G	A	0.0991772	-0.0497775	0.172813	0.815235	FALSE	FALSE	FALSE	GVY4Ce	165978223	0.0991425	0.0301861	TRUE	reported	textfile	0.0219344	6.13931e-06	TRUE	reported	textfile	6902	TRUE	0.00295333	20.4384	21.3626
	rs9406110	A	G	A	G	-0.0894199	-0.000271721	0.229681	0.767034	FALSE	FALSE	FALSE	GVY4Ce	8236962	0.9922	0.0277959	TRUE	reported	textfile	0.0200898	8.54658e-06	TRUE	reported	textfile	6902	TRUE	0.00286218	19.8057	21.3626
GCST90199634	rs1040519	G	A	G	A	-0.0818991	0.00218602	0.708369	0.380455	FALSE	FALSE	FALSE	GVY4Ce	9542333	0.928621	0.0244029	TRUE	reported	textfile	0.0168315	1.13978e-06	TRUE	reported	textfile	8128	TRUE	0.00290446	23.6704	42.1889
	rs10877499	C	T	C	T	0.085716	-0.00392831	0.212153	0.874282	FALSE	FALSE	FALSE	GVY4Ce	61025502	0.91207	0.0355735	TRUE	reported	textfile	0.0188366	5.35153e-06	TRUE	reported	textfile	8128	TRUE	0.00254115	20.702	42.1889
	rs113983401	C	G	C	G	0.161297	0.0510461	0.0498823	0.0149137	FALSE	TRUE	FALSE	GVY4Ce	87637966	0.587396	0.0940745	TRUE	reported	textfile	0.0354213	5.27173e-06	TRUE	reported	textfile	8128	TRUE	0.00254468	20.7308	42.1889
	rs115469488	A	G	A	G	-0.663355	0.129488	0.00284936	0.989745	FALSE	FALSE	FALSE	GVY4Ce	22766918	0.288537	0.122005	TRUE	reported	textfile	0.14407	4.13661e-06	TRUE	reported	textfile	8128	TRUE	0.00260154	21.1952	42.1889
	rs117462872	G	A	G	A	0.286413	0.180861	0.014046	0.973173	FALSE	FALSE	FALSE	GVY4Ce	141957630	0.0145238	0.074001	TRUE	reported	textfile	0.0645828	9.21479e-06	TRUE	reported	textfile	8128	TRUE	0.0024139	19.6628	42.1889
	rs12499749	A	G	A	G	0.176873	-0.178978	0.0455162	0.963879	FALSE	FALSE	FALSE	GVY4Ce	30325758	0.00275893	0.059791	TRUE	reported	textfile	0.0364889	1.25139e-06	TRUE	reported	textfile	8128	TRUE	0.00288247	23.4906	42.1889
	rs12901358	C	T	C	T	0.070543	0.0169147	0.387751	0.510855	FALSE	FALSE	FALSE	GVY4Ce	98630252	0.474333	0.0236421	TRUE	reported	textfile	0.0157671	7.67443e-06	TRUE	reported	textfile	8128	TRUE	0.0024567	20.0123	42.1889
	rs1330804	A	G	A	G	-0.0735292	0.0219346	0.405292	0.563147	FALSE	FALSE	FALSE	GVY4Ce	113238996	0.360199	0.0239727	TRUE	reported	textfile	0.0164301	7.63159e-06	TRUE	reported	textfile	8128	TRUE	0.00245803	20.0231	42.1889
	rs139663065	T	C	T	C	0.281865	0.120258	0.0148944	0.99511	FALSE	FALSE	FALSE	GVY4Ce	14402942	0.468989	0.166074	TRUE	reported	textfile	0.0631701	8.11986e-06	TRUE	reported	textfile	8128	TRUE	0.0024435	19.9045	42.1889
	rs140233308	T	G	T	G	0.320974	0.113993	0.0116409	0.998592	FALSE	FALSE	FALSE	GVY4Ce	81810718	0.724094	0.322934	TRUE	reported	textfile	0.0719087	8.05839e-06	TRUE	reported	textfile	8128	TRUE	0.00244529	19.9191	42.1889
	rs144429282	T	C	T	C	0.387083	-0.109518	0.0119106	0.972016	FALSE	FALSE	FALSE	GVY4Ce	30096963	0.12353	0.0711096	TRUE	reported	textfile	0.0705729	4.13767e-08	TRUE	reported	textfile	8128	TRUE	0.0036876	30.0764	42.1889
	rs1502069	T	C	T	C	-0.0811985	-0.0355113	0.764257	0.263566	FALSE	FALSE	FALSE	GVY4Ce	86458070	0.182496	0.0266379	TRUE	reported	textfile	0.0181157	7.38717e-06	TRUE	reported	textfile	8128	TRUE	0.00246564	20.0853	42.1889
	rs17533872	T	C	T	C	0.0752854	-0.0146582	0.424131	0.620875	FALSE	FALSE	FALSE	GVY4Ce	41641427	0.546349	0.0242991	TRUE	reported	textfile	0.0158196	1.94553e-06	TRUE	reported	textfile	8128	TRUE	0.00277868	22.6425	42.1889
	rs3819547	C	G	C	G	-0.124927	0.0264283	0.0878938	0.0504931	FALSE	TRUE	FALSE	GVY4Ce	72465045	0.620166	0.0533243	TRUE	reported	textfile	0.0272675	4.61627e-06	TRUE	reported	textfile	8128	TRUE	0.00257584	20.9853	42.1889
	rs3885951	G	A	G	A	0.578606	-0.0708091	0.0990508	0.93669	FALSE	FALSE	FALSE	GVY4Ce	78533575	0.143913	0.0484538	TRUE	reported	textfile	0.0249628	7.46543e-119	TRUE	reported	textfile	8128	TRUE	0.0620009	537.121	42.1889
	rs41322846	C	G	C	G	0.113555	0.0752547	0.0998263	0.060502	FALSE	TRUE	FALSE	GVY4Ce	96510327	0.13134	0.0498759	TRUE	reported	textfile	0.0256097	9.24784e-06	TRUE	reported	textfile	8128	TRUE	0.00241307	19.6561	42.1889
	rs55700529	A	G	A	G	0.292762	0.0110151	0.0170546	0.977926	FALSE	FALSE	FALSE	GVY4Ce	17851418	0.888305	0.0784275	TRUE	reported	textfile	0.0593343	8.05186e-07	TRUE	reported	textfile	8128	TRUE	0.00298631	24.3395	42.1889
	rs58374597	A	T	A	T	0.610277	0.195192	0.0158799	0.0187604	FALSE	TRUE	FALSE	GVY4Ce	78417591	0.0305992	0.0902728	TRUE	reported	textfile	0.0609732	1.39229e-23	TRUE	reported	textfile	8128	TRUE	0.0121751	100.154	42.1889
	rs6495304	A	G	A	G	0.266767	-0.0645265	0.973048	0.06377	FALSE	FALSE	FALSE	GVY4Ce	78508074	0.180278	0.0481576	TRUE	reported	textfile	0.0475445	2.01281e-08	TRUE	reported	textfile	8128	TRUE	0.00385834	31.4743	42.1889
	rs661331	T	A	T	A	0.112287	0.00287363	0.103335	0.150808	FALSE	TRUE	FALSE	GVY4Ce	29933975	0.93067	0.0330297	TRUE	reported	textfile	0.025189	8.28197e-06	TRUE	reported	textfile	8128	TRUE	0.00243889	19.8669	42.1889
	rs73248769	C	T	C	T	0.397814	0.0955086	0.00837335	0.982876	FALSE	FALSE	FALSE	GVY4Ce	32271206	0.293095	0.0908431	TRUE	reported	textfile	0.0842519	2.33854e-06	TRUE	reported	textfile	8128	TRUE	0.00273544	22.2892	42.1889
	rs73429419	T	C	T	C	-0.0978899	0.0541444	0.150779	0.872025	FALSE	FALSE	FALSE	GVY4Ce	138372606	0.128381	0.0356092	TRUE	reported	textfile	0.0214524	5.03982e-06	TRUE	reported	textfile	8128	TRUE	0.00255523	20.817	42.1889
	rs74582811	G	A	G	A	0.227003	0.0221601	0.0289046	0.946892	FALSE	FALSE	FALSE	GVY4Ce	78966596	0.675986	0.0530214	TRUE	reported	textfile	0.0458676	7.45581e-07	TRUE	reported	textfile	8128	TRUE	0.00300442	24.4875	42.1889
	rs75233276	T	C	T	C	0.347685	-0.0234559	0.00972787	0.995929	FALSE	FALSE	FALSE	GVY4Ce	72366734	0.89665	0.180578	TRUE	reported	textfile	0.0782868	8.94701e-06	TRUE	reported	textfile	8128	TRUE	0.0024208	19.7191	42.1889
	rs76751577	A	G	A	G	0.322064	-0.387925	0.0116681	0.993761	FALSE	FALSE	FALSE	GVY4Ce	234308092	0.00313372	0.131308	TRUE	reported	textfile	0.0713328	6.333e-06	TRUE	reported	textfile	8128	TRUE	0.00250169	20.3798	42.1889
	rs78818599	G	T	G	T	-0.215533	0.0541505	0.0250279	0.94902	FALSE	FALSE	FALSE	GVY4Ce	179875859	0.323527	0.0548506	TRUE	reported	textfile	0.0487937	9.99777e-06	TRUE	reported	textfile	8128	TRUE	0.00239483	19.5071	42.1889
	rs9341222	C	T	C	T	0.230094	-0.0374409	0.0234238	0.965078	FALSE	FALSE	FALSE	GVY4Ce	216664687	0.579968	0.0676523	TRUE	reported	textfile	0.0513898	7.55513e-06	TRUE	reported	textfile	8128	TRUE	0.00246039	20.0424	42.1889
	rs9559451	C	T	C	T	-0.0752947	0.0135477	0.664775	0.216746	FALSE	FALSE	FALSE	GVY4Ce	108973515	0.637588	0.0287592	TRUE	reported	textfile	0.0165065	5.07846e-06	TRUE	reported	textfile	8128	TRUE	0.00255343	20.8023	42.1889
	rs999856	A	G	A	G	-0.215444	0.0482836	0.0257376	0.966571	FALSE	FALSE	FALSE	GVY4Ce	14019697	0.464499	0.06601	TRUE	reported	textfile	0.0485076	8.93524e-06	TRUE	reported	textfile	8128	TRUE	0.0024211	19.7216	42.1889
GCST90199635	rs10073658	G	A	G	A	0.104011	0.0133091	0.136043	0.926374	FALSE	FALSE	FALSE	GVY4Ce	51743877	0.771299	0.0457868	TRUE	reported	textfile	0.0231405	6.96524e-06	TRUE	reported	textfile	7925	TRUE	0.00254278	20.1978	22.4001
	rs112264683	C	T	C	T	0.368503	-0.0804378	0.00914634	0.962621	FALSE	FALSE	FALSE	GVY4Ce	1098668	0.193784	0.0619006	TRUE	reported	textfile	0.0824753	7.89377e-06	TRUE	reported	textfile	7925	TRUE	0.00251271	19.9583	22.4001
	rs112307471	A	G	A	G	-0.238964	0.0809294	0.0250225	0.985886	FALSE	FALSE	FALSE	GVY4Ce	204454067	0.431496	0.102881	TRUE	reported	textfile	0.0506661	2.40006e-06	TRUE	reported	textfile	7925	TRUE	0.00279907	22.2393	22.4001
	rs112423294	A	G	A	G	-0.402137	0.206837	0.00782144	0.99545	FALSE	FALSE	FALSE	GVY4Ce	48833025	0.245762	0.178199	TRUE	reported	textfile	0.0883872	5.37163e-06	TRUE	reported	textfile	7925	TRUE	0.00260518	20.6947	22.4001
	rs116511059	T	C	T	C	0.400938	0.173785	0.0094268	0.996308	FALSE	FALSE	FALSE	GVY4Ce	27584519	0.379773	0.197862	TRUE	reported	textfile	0.0799895	5.37602e-07	TRUE	reported	textfile	7925	TRUE	0.0031602	25.1176	22.4001
	rs12929353	A	G	A	G	-0.396283	0.135177	0.00898891	0.985791	FALSE	FALSE	FALSE	GVY4Ce	1189810	0.188047	0.102689	TRUE	reported	textfile	0.0827237	1.6642e-06	TRUE	reported	textfile	7925	TRUE	0.00288733	22.9425	22.4001
	rs13283163	A	G	A	G	0.170526	0.0129569	0.0526149	0.968357	FALSE	FALSE	FALSE	GVY4Ce	3389660	0.844676	0.0661348	TRUE	reported	textfile	0.0347529	9.25742e-07	TRUE	reported	textfile	7925	TRUE	0.00302888	24.0707	22.4001
	rs141685561	T	C	T	C	-0.143423	0.0416826	0.0739347	0.968389	FALSE	FALSE	FALSE	GVY4Ce	23891620	0.527934	0.0660411	TRUE	reported	textfile	0.0298661	1.56938e-06	TRUE	reported	textfile	7925	TRUE	0.00290148	23.0553	22.4001
	rs143985394	G	A	G	A	-0.240823	0.0548399	0.0216392	0.96936	FALSE	FALSE	FALSE	GVY4Ce	14838555	0.426049	0.068897	TRUE	reported	textfile	0.0541185	8.59042e-06	TRUE	reported	textfile	7925	TRUE	0.00249242	19.7968	22.4001
	rs145409686	C	T	C	T	-0.550427	0.00634045	0.0041228	0.953412	FALSE	FALSE	FALSE	GVY4Ce	28328582	0.910885	0.0566504	TRUE	reported	textfile	0.120275	4.73054e-06	TRUE	reported	textfile	7925	TRUE	0.00263574	20.9382	22.4001
	rs146175767	T	C	T	C	-0.121342	-0.00185534	0.0945706	0.9341	FALSE	FALSE	FALSE	GVY4Ce	86073341	0.968865	0.0475337	TRUE	reported	textfile	0.0264241	4.38776e-06	TRUE	reported	textfile	7925	TRUE	0.0026538	21.082	22.4001
	rs147941428	G	A	G	A	-0.340237	0.0155882	0.0130043	0.943171	FALSE	FALSE	FALSE	GVY4Ce	5766027	0.76331	0.0517644	TRUE	reported	textfile	0.0690333	8.28252e-07	TRUE	reported	textfile	7925	TRUE	0.00305575	24.2849	22.4001
	rs148153141	G	A	G	A	-0.27871	-0.184866	0.0199163	0.995428	FALSE	FALSE	FALSE	GVY4Ce	20426589	0.304378	0.17999	TRUE	reported	textfile	0.0551887	4.41503e-07	TRUE	reported	textfile	7925	TRUE	0.00320782	25.4974	22.4001
	rs17767728	C	T	C	T	0.0909404	-0.0473454	0.194635	0.831329	FALSE	FALSE	FALSE	GVY4Ce	133697804	0.132566	0.0314784	TRUE	reported	textfile	0.0194777	3.02745e-06	TRUE	reported	textfile	7925	TRUE	0.00274313	21.7936	22.4001
	rs187719086	T	C	T	C	-0.29344	0.0179484	0.0137168	0.945354	FALSE	FALSE	FALSE	GVY4Ce	46001728	0.730521	0.0521103	TRUE	reported	textfile	0.0662578	9.47782e-06	TRUE	reported	textfile	7925	TRUE	0.00246883	19.609	22.4001
	rs191187061	T	C	T	C	-0.304207	0.116734	0.0178844	0.980895	FALSE	FALSE	FALSE	GVY4Ce	156527256	0.172202	0.0855091	TRUE	reported	textfile	0.0586874	2.1775e-07	TRUE	reported	textfile	7925	TRUE	0.00337893	26.862	22.4001
	rs2186671	G	A	G	A	-0.0760014	0.00565738	0.448059	0.478314	FALSE	FALSE	FALSE	GVY4Ce	109407701	0.811391	0.0237075	TRUE	reported	textfile	0.016068	2.24527e-06	TRUE	reported	textfile	7925	TRUE	0.00281511	22.3671	22.4001
	rs34927101	T	C	T	C	0.294909	-0.0186898	0.0178774	0.979926	FALSE	FALSE	FALSE	GVY4Ce	20433373	0.822026	0.0830882	TRUE	reported	textfile	0.0587005	5.06156e-07	TRUE	reported	textfile	7925	TRUE	0.00317477	25.2338	22.4001
	rs4812445	G	A	G	A	-0.0994662	-0.0086773	0.253933	0.724942	FALSE	FALSE	FALSE	GVY4Ce	40610096	0.744134	0.0265861	TRUE	reported	textfile	0.0192108	2.24745e-07	TRUE	reported	textfile	7925	TRUE	0.00337128	26.801	22.4001
	rs62058082	T	C	T	C	-0.105084	0.0332033	0.168677	0.770236	FALSE	FALSE	FALSE	GVY4Ce	12879352	0.234423	0.0279244	TRUE	reported	textfile	0.0220071	1.7969e-06	TRUE	reported	textfile	7925	TRUE	0.0028688	22.7949	22.4001
	rs73478203	G	A	G	A	0.0825426	0.0477557	0.230375	0.762866	FALSE	FALSE	FALSE	GVY4Ce	79617290	0.0859785	0.0278133	TRUE	reported	textfile	0.0184542	7.71921e-06	TRUE	reported	textfile	7925	TRUE	0.00251809	20.0012	22.4001
	rs74432647	T	C	T	C	0.150663	-0.00429415	0.0724275	0.930915	FALSE	FALSE	FALSE	GVY4Ce	224858109	0.925603	0.0459865	TRUE	reported	textfile	0.0304065	7.23414e-07	TRUE	reported	textfile	7925	TRUE	0.00308843	24.5454	22.4001
	rs75223710	T	C	T	C	-0.219819	-0.0565147	0.0257673	0.961498	FALSE	FALSE	FALSE	GVY4Ce	246124049	0.358727	0.0615767	TRUE	reported	textfile	0.0494675	8.84241e-06	TRUE	reported	textfile	7925	TRUE	0.00248548	19.7415	22.4001
	rs77831208	T	C	T	C	0.249552	0.046912	0.0208412	0.97514	FALSE	FALSE	FALSE	GVY4Ce	110665898	0.530167	0.0747304	TRUE	reported	textfile	0.0549664	5.62337e-06	TRUE	reported	textfile	7925	TRUE	0.00259418	20.6071	22.4001
	rs78674307	G	T	G	T	-0.150826	-0.0605123	0.0557029	0.971245	FALSE	FALSE	FALSE	GVY4Ce	43525745	0.392677	0.0707934	TRUE	reported	textfile	0.0340435	9.40626e-06	TRUE	reported	textfile	7925	TRUE	0.00247065	19.6234	22.4001
	rs79970883	T	C	T	C	-0.195098	-0.0164128	0.042993	0.933501	FALSE	FALSE	FALSE	GVY4Ce	84382959	0.72846	0.0472753	TRUE	reported	textfile	0.03888	5.2225e-07	TRUE	reported	textfile	7925	TRUE	0.0031672	25.1735	22.4001
	rs9510299	C	G	C	G	-0.0736478	-0.0293973	0.359614	0.339635	FALSE	TRUE	FALSE	GVY4Ce	22714494	0.237044	0.0248623	TRUE	reported	textfile	0.01656	8.69424e-06	TRUE	reported	textfile	7925	TRUE	0.00248953	19.7738	22.4001
GCST90199636	rs10216901	T	C	T	C	-0.092585	0.0159965	0.372432	0.61944	FALSE	FALSE	FALSE	GVY4Ce	39947074	0.507595	0.0241424	TRUE	reported	textfile	0.0153069	1.4614e-09	TRUE	reported	textfile	8244	TRUE	0.0044182	36.5764	31.2343
	rs10516101	T	C	T	C	-0.123617	-0.0640855	0.0812102	0.917595	FALSE	FALSE	FALSE	GVY4Ce	173639728	0.138425	0.0432519	TRUE	reported	textfile	0.0269608	4.53863e-06	TRUE	reported	textfile	8244	TRUE	0.00254359	21.0177	31.2343
	rs10883982	C	A	C	A	-0.0787528	0.0602557	0.22765	0.782837	FALSE	FALSE	FALSE	GVY4Ce	104214575	0.0346769	0.0285287	TRUE	reported	textfile	0.0174501	6.39098e-06	TRUE	reported	textfile	8244	TRUE	0.00246449	20.3625	31.2343
	rs11055387	C	G	C	G	-0.145349	-0.00740567	0.0566212	0.0236266	FALSE	TRUE	FALSE	GVY4Ce	13367062	0.921316	0.0749738	TRUE	reported	textfile	0.0321909	6.32541e-06	TRUE	reported	textfile	8244	TRUE	0.00246688	20.3823	31.2343
	rs116794445	A	G	A	G	-0.322608	0.157333	0.0110504	0.997255	FALSE	FALSE	FALSE	GVY4Ce	13501913	0.494502	0.2303	TRUE	reported	textfile	0.0709539	5.44861e-06	TRUE	reported	textfile	8244	TRUE	0.00250134	20.6677	31.2343
	rs17240098	T	G	T	G	0.148969	-0.0909389	0.0553582	0.971264	FALSE	FALSE	FALSE	GVY4Ce	52270924	0.20298	0.0714307	TRUE	reported	textfile	0.0327399	5.36261e-06	TRUE	reported	textfile	8244	TRUE	0.00250501	20.6982	31.2343
	rs17287314	A	T	A	T	-0.0741746	0.0394455	0.297359	0.304047	FALSE	TRUE	FALSE	GVY4Ce	105966054	0.126176	0.0257922	TRUE	reported	textfile	0.0165025	6.96562e-06	TRUE	reported	textfile	8244	TRUE	0.00244461	20.1979	31.2343
	rs3184504	C	T	C	T	-0.108142	0.0492341	0.513669	0.407009	FALSE	FALSE	FALSE	GVY4Ce	111446804	0.0402763	0.0240061	TRUE	reported	textfile	0.0148104	2.83947e-13	TRUE	reported	textfile	8244	TRUE	0.00642566	53.3028	31.2343
	rs34519073	A	G	A	G	0.071803	-0.0259466	0.311375	0.671926	FALSE	FALSE	FALSE	GVY4Ce	49143607	0.300007	0.0250349	TRUE	reported	textfile	0.0160729	7.92019e-06	TRUE	reported	textfile	8244	TRUE	0.00241495	19.9522	31.2343
	rs35223481	A	T	A	T	-0.105966	-0.0202938	0.112435	0.130802	FALSE	TRUE	FALSE	GVY4Ce	94546420	0.561221	0.0349274	TRUE	reported	textfile	0.0235442	6.77162e-06	TRUE	reported	textfile	8244	TRUE	0.0024511	20.2516	31.2343
	rs4843270	A	C	A	C	0.205627	-0.0369558	0.265349	0.771432	FALSE	FALSE	FALSE	GVY4Ce	87844466	0.186515	0.0279765	TRUE	reported	textfile	0.0165261	1.53431e-35	TRUE	reported	textfile	8244	TRUE	0.0184332	154.78	31.2343
	rs55709807	A	G	A	G	0.178987	-0.00962402	0.0356445	0.965792	FALSE	FALSE	FALSE	GVY4Ce	137960969	0.882925	0.0653526	TRUE	reported	textfile	0.0395664	6.07661e-06	TRUE	reported	textfile	8244	TRUE	0.00247614	20.459	31.2343
	rs55879891	A	C	A	C	0.101148	-0.0347893	0.137167	0.82664	FALSE	FALSE	FALSE	GVY4Ce	127356687	0.275744	0.0319188	TRUE	reported	textfile	0.0215999	2.83001e-06	TRUE	reported	textfile	8244	TRUE	0.00265289	21.9233	31.2343
	rs61825638	T	C	T	C	0.130031	0.0185176	0.246402	0.764567	FALSE	FALSE	FALSE	GVY4Ce	241550102	0.503484	0.0276788	TRUE	reported	textfile	0.0171027	2.89497e-14	TRUE	reported	textfile	8244	TRUE	0.00696293	57.7908	31.2343
	rs6440053	A	T	A	T	0.0964971	0.0460636	0.842367	0.823506	FALSE	TRUE	FALSE	GVY4Ce	141940670	0.135346	0.0308458	TRUE	reported	textfile	0.0204102	2.26858e-06	TRUE	reported	textfile	8244	TRUE	0.00270408	22.3475	31.2343
	rs6481144	C	A	C	A	-0.21192	0.00780824	0.971072	0.027238	FALSE	FALSE	FALSE	GVY4Ce	55140633	0.915157	0.0732915	TRUE	reported	textfile	0.0450635	2.56748e-06	TRUE	reported	textfile	8244	TRUE	0.00267542	22.11	31.2343
	rs6540080	A	G	A	G	-0.107927	-0.00757072	0.287217	0.646137	FALSE	FALSE	FALSE	GVY4Ce	87784963	0.759385	0.0247175	TRUE	reported	textfile	0.0164258	5.01151e-11	TRUE	reported	textfile	8244	TRUE	0.00520956	43.162	31.2343
	rs72761290	A	C	A	C	0.135722	0.0109979	0.0752681	0.922496	FALSE	FALSE	FALSE	GVY4Ce	130403493	0.806365	0.0448677	TRUE	reported	textfile	0.0286233	2.11975e-06	TRUE	reported	textfile	8244	TRUE	0.00271982	22.4779	31.2343
	rs72789484	A	G	A	G	-0.144555	0.0246315	0.0546991	0.933913	FALSE	FALSE	FALSE	GVY4Ce	75786534	0.605288	0.0476605	TRUE	reported	textfile	0.0325854	9.15605e-06	TRUE	reported	textfile	8244	TRUE	0.00238148	19.675	31.2343
	rs75973738	A	T	A	T	-0.194072	-0.0162567	0.0423521	0.0675216	FALSE	TRUE	FALSE	GVY4Ce	84718587	0.730291	0.0471567	TRUE	reported	textfile	0.0374159	2.13841e-07	TRUE	reported	textfile	8244	TRUE	0.00325282	26.8973	31.2343
	rs79435381	A	G	A	G	-0.166018	0.0177405	0.0418438	0.93408	FALSE	FALSE	FALSE	GVY4Ce	75842746	0.709112	0.0475554	TRUE	reported	textfile	0.0368091	6.4752e-06	TRUE	reported	textfile	8244	TRUE	0.00246145	20.3374	31.2343
	rs9821445	C	T	C	T	0.0994985	-0.0644435	0.147783	0.880767	FALSE	FALSE	FALSE	GVY4Ce	184219831	0.0764469	0.0363742	TRUE	reported	textfile	0.0206581	1.46142e-06	TRUE	reported	textfile	8244	TRUE	0.00280604	23.1925	31.2343
	rs9909552	G	C	G	C	0.0692728	-0.0113835	0.37961	0.399384	FALSE	TRUE	FALSE	GVY4Ce	36834695	0.636146	0.0240618	TRUE	reported	textfile	0.0155536	8.43552e-06	TRUE	reported	textfile	8244	TRUE	0.00240039	19.8316	31.2343
	rs9933330	T	C	T	C	-0.103406	-0.00513922	0.180459	0.773757	FALSE	FALSE	FALSE	GVY4Ce	20355488	0.85481	0.0280855	TRUE	reported	textfile	0.0193124	8.58377e-08	TRUE	reported	textfile	8244	TRUE	0.00346556	28.6625	31.2343
	rs9988529	C	T	C	T	-0.180183	-0.0157606	0.042129	0.884048	FALSE	FALSE	FALSE	GVY4Ce	63194695	0.67357	0.0374136	TRUE	reported	textfile	0.036929	1.06523e-06	TRUE	reported	textfile	8244	TRUE	0.0028794	23.8006	31.2343
GCST90199637	rs10168931	A	G	A	G	0.123014	0.026372	0.224014	0.822585	FALSE	FALSE	FALSE	GVY4Ce	73650092	0.391488	0.0307753	TRUE	reported	textfile	0.0183105	1.83992e-11	TRUE	reported	textfile	7802	TRUE	0.00575172	45.1229	23.4302
	rs10762589	T	C	T	C	-0.0883667	0.0216855	0.752636	0.322827	FALSE	FALSE	FALSE	GVY4Ce	74229994	0.389937	0.0252236	TRUE	reported	textfile	0.017702	5.97844e-07	TRUE	reported	textfile	7802	TRUE	0.00318377	24.9127	23.4302
	rs10854172	C	T	C	T	0.116341	-0.000157489	0.187765	0.792548	FALSE	FALSE	FALSE	GVY4Ce	46598884	0.995687	0.029138	TRUE	reported	textfile	0.01969	3.44954e-09	TRUE	reported	textfile	7802	TRUE	0.00445481	34.903	23.4302
	rs10872573	C	T	C	T	-0.0805091	-0.00185069	0.723072	0.362909	FALSE	FALSE	FALSE	GVY4Ce	100362746	0.940172	0.0246582	TRUE	reported	textfile	0.0174765	4.09071e-06	TRUE	reported	textfile	7802	TRUE	0.00271266	21.2163	23.4302
	rs10957056	C	A	C	A	0.087937	-0.0114227	0.191407	0.857314	FALSE	FALSE	FALSE	GVY4Ce	58487627	0.731324	0.033267	TRUE	reported	textfile	0.0197421	8.41709e-06	TRUE	reported	textfile	7802	TRUE	0.00253657	19.8356	23.4302
	rs116233634	G	A	G	A	0.279475	-0.0229752	0.0158761	0.979595	FALSE	FALSE	FALSE	GVY4Ce	14712674	0.787127	0.0850798	TRUE	reported	textfile	0.0616153	5.73854e-06	TRUE	reported	textfile	7802	TRUE	0.00263002	20.5683	23.4302
	rs12070599	A	G	A	G	-0.0833283	0.00871013	0.31028	0.748337	FALSE	FALSE	FALSE	GVY4Ce	166530566	0.75105	0.0274548	TRUE	reported	textfile	0.0173446	1.55314e-06	TRUE	reported	textfile	7802	TRUE	0.00294963	23.0752	23.4302
	rs12554315	A	T	A	T	0.155318	-0.102089	0.0556449	0.0692248	FALSE	TRUE	FALSE	GVY4Ce	26390175	0.0286748	0.0466598	TRUE	reported	textfile	0.0339765	4.84654e-06	TRUE	reported	textfile	7802	TRUE	0.00267128	20.8918	23.4302
	rs148804382	A	C	A	C	0.395956	0.222049	0.0103166	0.993513	FALSE	FALSE	FALSE	GVY4Ce	52078217	0.128328	0.146015	TRUE	reported	textfile	0.0769657	2.68117e-07	TRUE	reported	textfile	7802	TRUE	0.00338083	26.4599	23.4302
	rs148895950	G	T	G	T	-0.297994	0.354028	0.0133051	0.995794	FALSE	FALSE	FALSE	GVY4Ce	118109730	0.0522998	0.182427	TRUE	reported	textfile	0.0670282	8.75659e-06	TRUE	reported	textfile	7802	TRUE	0.00252694	19.7601	23.4302
	rs186654219	A	G	A	G	0.36491	0.0658622	0.0103212	0.99645	FALSE	FALSE	FALSE	GVY4Ce	64819753	0.733108	0.193148	TRUE	reported	textfile	0.0767441	1.98548e-06	TRUE	reported	textfile	7802	TRUE	0.00288947	22.6032	23.4302
	rs187543759	C	T	C	T	-0.329606	0.0261742	0.0110081	0.988356	FALSE	FALSE	FALSE	GVY4Ce	77383611	0.812026	0.110062	TRUE	reported	textfile	0.0734255	7.15653e-06	TRUE	reported	textfile	7802	TRUE	0.00257614	20.1458	23.4302
	rs2265815	G	A	G	A	0.0912856	0.0137743	0.820119	0.257867	FALSE	FALSE	FALSE	GVY4Ce	127531312	0.609123	0.0269384	TRUE	reported	textfile	0.0200603	5.35021e-06	TRUE	reported	textfile	7802	TRUE	0.00264711	20.7023	23.4302
	rs2803552	C	T	C	T	-0.205145	-0.0688303	0.96381	0.020817	FALSE	FALSE	FALSE	GVY4Ce	86543369	0.393413	0.0806501	TRUE	reported	textfile	0.0419759	1.02278e-06	TRUE	reported	textfile	7802	TRUE	0.00305203	23.8787	23.4302
	rs28690110	T	C	T	C	-0.0796679	-0.0163074	0.256755	0.635579	FALSE	FALSE	FALSE	GVY4Ce	43990158	0.506277	0.0245354	TRUE	reported	textfile	0.017735	7.05164e-06	TRUE	reported	textfile	7802	TRUE	0.00257974	20.174	23.4302
	rs4336667	A	G	A	G	-0.0726878	-0.0120421	0.567883	0.451948	FALSE	FALSE	FALSE	GVY4Ce	105978380	0.610214	0.0236227	TRUE	reported	textfile	0.0157023	3.67215e-06	TRUE	reported	textfile	7802	TRUE	0.00273905	21.4232	23.4302
	rs60665648	C	T	C	T	-0.261085	-0.220772	0.0195022	0.9909	FALSE	FALSE	FALSE	GVY4Ce	41455862	0.073301	0.123271	TRUE	reported	textfile	0.0554528	2.49863e-06	TRUE	reported	textfile	7802	TRUE	0.00283321	22.1618	23.4302
	rs7154858	C	T	C	T	0.0944413	-0.0397236	0.155615	0.898061	FALSE	FALSE	FALSE	GVY4Ce	70529167	0.308074	0.0389726	TRUE	reported	textfile	0.0212157	8.52813e-06	TRUE	reported	textfile	7802	TRUE	0.00253339	19.8106	23.4302
	rs76105072	C	T	C	T	0.178385	-0.0295785	0.0402336	0.969119	FALSE	FALSE	FALSE	GVY4Ce	157967616	0.666692	0.0686763	TRUE	reported	textfile	0.0390113	4.81571e-06	TRUE	reported	textfile	7802	TRUE	0.00267281	20.9038	23.4302
	rs79132971	A	C	A	C	0.132736	0.0288323	0.0725952	0.942651	FALSE	FALSE	FALSE	GVY4Ce	3293263	0.568205	0.0505212	TRUE	reported	textfile	0.0296366	7.50724e-06	TRUE	reported	textfile	7802	TRUE	0.00256448	20.0544	23.4302
GCST90199638	rs10521085	T	C	T	C	-0.113394	-0.0549219	0.108586	0.91029	FALSE	FALSE	FALSE	GVY4Ce	7662319	0.191518	0.0420502	TRUE	reported	textfile	0.0249262	5.38568e-06	TRUE	reported	textfile	8201	TRUE	0.00251714	20.6901	27.5081
	rs113971921	T	C	T	C	0.0971709	-0.0492065	0.166028	0.850719	FALSE	FALSE	FALSE	GVY4Ce	108745728	0.139887	0.0333329	TRUE	reported	textfile	0.0213914	5.5584e-06	TRUE	reported	textfile	8201	TRUE	0.00250978	20.6295	27.5081
	rs11603769	C	G	C	G	0.229614	-0.114068	0.0240741	0.0108571	FALSE	TRUE	FALSE	GVY4Ce	98185552	0.317296	0.114065	TRUE	reported	textfile	0.0511828	7.25222e-06	TRUE	reported	textfile	8201	TRUE	0.00244803	20.1207	27.5081
	rs117110311	C	G	C	G	0.488462	-0.00381292	0.005377	0.0154471	FALSE	TRUE	FALSE	GVY4Ce	107383264	0.9682	0.0956434	TRUE	reported	textfile	0.106255	4.28443e-06	TRUE	reported	textfile	8201	TRUE	0.00257027	21.1279	27.5081
	rs118152300	T	G	T	G	0.167422	0.0800096	0.0451781	0.973189	FALSE	FALSE	FALSE	GVY4Ce	120249022	0.273056	0.0729981	TRUE	reported	textfile	0.0374675	7.87849e-06	TRUE	reported	textfile	8201	TRUE	0.00242881	19.9623	27.5081
	rs118174096	T	C	T	C	-0.281275	0.0741538	0.0158449	0.980139	FALSE	FALSE	FALSE	GVY4Ce	112661622	0.378119	0.0841349	TRUE	reported	textfile	0.06139	4.6107e-06	TRUE	reported	textfile	8201	TRUE	0.00255323	20.9875	27.5081
	rs12770630	T	C	T	C	-0.115058	-0.0871436	0.12587	0.905461	FALSE	FALSE	FALSE	GVY4Ce	109776626	0.029955	0.0401457	TRUE	reported	textfile	0.0235144	9.92606e-07	TRUE	reported	textfile	8201	TRUE	0.00291094	23.9365	27.5081
	rs138201625	C	G	C	G	0.330102	0.074709	0.0129099	0.00999052	FALSE	TRUE	FALSE	GVY4Ce	158472466	0.534477	0.120268	TRUE	reported	textfile	0.0688063	1.6062e-06	TRUE	reported	textfile	8201	TRUE	0.0027987	23.0109	27.5081
	rs143671553	G	A	G	A	-0.236422	-0.161327	0.0235791	0.987576	FALSE	FALSE	FALSE	GVY4Ce	76893247	0.140651	0.109495	TRUE	reported	textfile	0.0500149	2.27834e-06	TRUE	reported	textfile	8201	TRUE	0.00271724	22.3394	27.5081
	rs149000340	T	C	T	C	-0.283142	0.0650087	0.0174881	0.989874	FALSE	FALSE	FALSE	GVY4Ce	207084178	0.587236	0.119756	TRUE	reported	textfile	0.059454	1.91329e-06	TRUE	reported	textfile	8201	TRUE	0.00275791	22.6746	27.5081
	rs149344982	A	G	A	G	0.321236	0.245629	0.0133024	0.992416	FALSE	FALSE	FALSE	GVY4Ce	21563267	0.0708957	0.135996	TRUE	reported	textfile	0.0677323	2.10864e-06	TRUE	reported	textfile	8201	TRUE	0.00273527	22.488	27.5081
	rs162416	G	T	G	T	0.0765529	0.0150118	0.289002	0.701914	FALSE	FALSE	FALSE	GVY4Ce	324356	0.559012	0.0256914	TRUE	reported	textfile	0.0172667	9.26914e-06	TRUE	reported	textfile	8201	TRUE	0.0023911	19.6516	27.5081
	rs16840029	A	G	A	G	0.170339	0.0719231	0.0445551	0.984251	FALSE	FALSE	FALSE	GVY4Ce	240441410	0.439767	0.0930939	TRUE	reported	textfile	0.0376776	6.15552e-06	TRUE	reported	textfile	8201	TRUE	0.00248607	20.4341	27.5081
	rs1780318	T	A	T	A	0.448805	0.0223086	0.943146	0.92552	FALSE	TRUE	FALSE	GVY4Ce	21569132	0.61393	0.0442218	TRUE	reported	textfile	0.0333781	3.24475e-41	TRUE	reported	textfile	8201	TRUE	0.0215702	180.753	27.5081
	rs186366783	A	T	A	T	0.2955	0.0525859	0.0223242	0.00938092	FALSE	TRUE	FALSE	GVY4Ce	5516581	0.657071	0.118447	TRUE	reported	textfile	0.0524575	1.76967e-08	TRUE	reported	textfile	8201	TRUE	0.00385439	31.7244	27.5081
	rs186970614	C	G	C	G	0.354048	0.0157007	0.00966006	0.0207833	FALSE	TRUE	FALSE	GVY4Ce	42205095	0.853823	0.0852172	TRUE	reported	textfile	0.07965	8.78718e-06	TRUE	reported	textfile	8201	TRUE	0.00240348	19.7536	27.5081
	rs337370	T	C	T	C	-0.0731129	-0.0588132	0.519666	0.517696	FALSE	FALSE	FALSE	GVY4Ce	177500083	0.0128103	0.0236293	TRUE	reported	textfile	0.0158083	3.74668e-06	TRUE	reported	textfile	8201	TRUE	0.00260147	21.3851	27.5081
	rs3750309	G	T	G	T	0.0779824	0.0119681	0.455985	0.477656	FALSE	FALSE	FALSE	GVY4Ce	60876009	0.610111	0.0234707	TRUE	reported	textfile	0.015705	6.85374e-07	TRUE	reported	textfile	8201	TRUE	0.00299741	24.6497	27.5081
	rs4709324	C	T	C	T	-0.0959369	-0.111385	0.171541	0.821129	FALSE	FALSE	FALSE	GVY4Ce	159442131	0.00017853	0.0297216	TRUE	reported	textfile	0.0210023	4.92582e-06	TRUE	reported	textfile	8201	TRUE	0.00253786	20.8608	27.5081
	rs537609697	G	A	G	A	-0.424592	0.0166001	0.00853513	0.963498	FALSE	FALSE	FALSE	GVY4Ce	33920063	0.797074	0.0645577	TRUE	reported	textfile	0.0873416	1.16631e-06	TRUE	reported	textfile	8201	TRUE	0.00287333	23.6263	27.5081
	rs56704741	C	T	C	T	-0.104833	-0.00399998	0.344183	0.654093	FALSE	FALSE	FALSE	GVY4Ce	21378351	0.871646	0.0247573	TRUE	reported	textfile	0.0165102	2.15937e-10	TRUE	reported	textfile	8201	TRUE	0.00489209	40.3075	27.5081
	rs6695630	G	C	G	C	-0.110939	-0.0249239	0.12601	0.120801	FALSE	TRUE	FALSE	GVY4Ce	39602239	0.491281	0.0362122	TRUE	reported	textfile	0.0235356	2.43304e-06	TRUE	reported	textfile	8201	TRUE	0.00270194	22.2132	27.5081
	rs6945869	T	C	T	C	-0.18358	0.0351634	0.0389125	0.930515	FALSE	FALSE	FALSE	GVY4Ce	154196642	0.455204	0.0470875	TRUE	reported	textfile	0.0411328	8.07826e-06	TRUE	reported	textfile	8201	TRUE	0.002423	19.9144	27.5081
	rs72650882	C	T	C	T	0.193643	-0.215897	0.0394383	0.957449	FALSE	FALSE	FALSE	GVY4Ce	20713817	9.66429e-05	0.0553742	TRUE	reported	textfile	0.0400346	1.31888e-06	TRUE	reported	textfile	8201	TRUE	0.00284465	23.3898	27.5081
	rs72852030	T	C	T	C	0.269297	0.122045	0.0168581	0.973273	FALSE	FALSE	FALSE	GVY4Ce	29222247	0.0877486	0.0714804	TRUE	reported	textfile	0.0591747	5.34198e-06	TRUE	reported	textfile	8201	TRUE	0.002519	20.7055	27.5081
	rs7319463	A	G	A	G	-0.217628	0.0290156	0.0285504	0.968248	FALSE	FALSE	FALSE	GVY4Ce	31418470	0.66807	0.0676674	TRUE	reported	textfile	0.0465571	2.94778e-06	TRUE	reported	textfile	8201	TRUE	0.00265727	21.845	27.5081
	rs73499488	G	C	G	C	0.248377	0.042405	0.0231351	0.0113329	FALSE	TRUE	FALSE	GVY4Ce	80347492	0.700324	0.110177	TRUE	reported	textfile	0.0518527	1.66738e-06	TRUE	reported	textfile	8201	TRUE	0.00278997	22.939	27.5081
	rs74622263	G	A	G	A	-0.148881	0.0401982	0.0567904	0.955982	FALSE	FALSE	FALSE	GVY4Ce	87361698	0.48158	0.0571187	TRUE	reported	textfile	0.0334532	8.57032e-06	TRUE	reported	textfile	8201	TRUE	0.00240929	19.8015	27.5081
	rs75198564	G	A	G	A	0.0914908	-0.0260421	0.180152	0.860059	FALSE	FALSE	FALSE	GVY4Ce	125321224	0.442129	0.0338824	TRUE	reported	textfile	0.0201541	5.63715e-06	TRUE	reported	textfile	8201	TRUE	0.00250652	20.6026	27.5081
	rs79393239	T	C	T	C	-0.213038	-0.0527544	0.0279306	0.987268	FALSE	FALSE	FALSE	GVY4Ce	184336884	0.613604	0.104477	TRUE	reported	textfile	0.0470789	6.03565e-06	TRUE	reported	textfile	8201	TRUE	0.00249064	20.4718	27.5081
	rs7968044	C	A	C	A	-0.0992173	0.0698028	0.140581	0.916613	FALSE	FALSE	FALSE	GVY4Ce	97298167	0.100323	0.0424775	TRUE	reported	textfile	0.022321	8.78797e-06	TRUE	reported	textfile	8201	TRUE	0.00240345	19.7534	27.5081
GCST90199639	rs10277377	T	C	T	C	0.116516	0.00879178	0.0950995	0.860989	FALSE	FALSE	FALSE	GVY4Ce	54909022	0.797002	0.0341788	TRUE	reported	textfile	0.0256952	5.77319e-06	TRUE	reported	textfile	8256	TRUE	0.00248438	20.5571	81.0769
	rs10774021	T	C	T	C	0.194878	-0.0226885	0.651353	0.315039	FALSE	FALSE	FALSE	GVY4Ce	240132	0.372474	0.0254399	TRUE	reported	textfile	0.0158871	1.37213e-34	TRUE	reported	textfile	8256	TRUE	0.0178988	150.429	81.0769
	rs11076256	T	C	T	C	0.714384	0.0390569	0.0774033	0.942423	FALSE	FALSE	FALSE	GVY4Ce	58718562	0.441731	0.0507711	TRUE	reported	textfile	0.0271182	6.11518e-153	TRUE	reported	textfile	8256	TRUE	0.077539	693.804	81.0769
	rs11672362	T	C	T	C	0.184489	0.0652409	0.0352009	0.991217	FALSE	FALSE	FALSE	GVY4Ce	43645748	0.594159	0.122445	TRUE	reported	textfile	0.0415283	8.89242e-06	TRUE	reported	textfile	8256	TRUE	0.00238477	19.7309	81.0769
	rs116793365	G	A	G	A	-0.300561	0.0983957	0.0127972	0.938155	FALSE	FALSE	FALSE	GVY4Ce	37065699	0.0446828	0.0490109	TRUE	reported	textfile	0.0670653	7.40785e-06	TRUE	reported	textfile	8256	TRUE	0.00242686	20.08	81.0769
	rs12601778	T	C	T	C	-0.107145	0.0396269	0.434368	0.528398	FALSE	FALSE	FALSE	GVY4Ce	82233472	0.0923677	0.0235448	TRUE	reported	textfile	0.0153104	2.59273e-12	TRUE	reported	textfile	8256	TRUE	0.00589702	48.9627	81.0769
	rs143277630	T	C	T	C	-0.312217	0.02598	0.0475578	0.959775	FALSE	FALSE	FALSE	GVY4Ce	58781671	0.666165	0.06022	TRUE	reported	textfile	0.0355437	1.57688e-18	TRUE	reported	textfile	8256	TRUE	0.0092593	77.1405	81.0769
	rs1441770	A	G	A	G	-0.0757838	0.0227904	0.399513	0.580915	FALSE	FALSE	FALSE	GVY4Ce	19899808	0.339187	0.0238449	TRUE	reported	textfile	0.0157461	1.48783e-06	TRUE	reported	textfile	8256	TRUE	0.00279782	23.158	81.0769
	rs145281230	G	A	G	A	-0.439015	0.117465	0.0105506	0.992225	FALSE	FALSE	FALSE	GVY4Ce	50205849	0.365207	0.129726	TRUE	reported	textfile	0.0738951	2.8318e-09	TRUE	reported	textfile	8256	TRUE	0.00425701	35.2876	81.0769
	rs146849590	C	A	C	A	-0.504435	0.810972	0.00444851	0.999551	FALSE	FALSE	FALSE	GVY4Ce	89073057	0.198999	0.631397	TRUE	reported	textfile	0.114153	9.9186e-06	TRUE	reported	textfile	8256	TRUE	0.00235961	19.5223	81.0769
	rs148327605	T	C	T	C	0.137958	0.0306994	0.0658858	0.930304	FALSE	FALSE	FALSE	GVY4Ce	92225957	0.506908	0.0462577	TRUE	reported	textfile	0.0306471	6.74724e-06	TRUE	reported	textfile	8256	TRUE	0.00244839	20.2586	81.0769
	rs149262976	C	T	C	T	0.405513	-0.0495344	0.00729306	0.995779	FALSE	FALSE	FALSE	GVY4Ce	79487462	0.782872	0.179748	TRUE	reported	textfile	0.0885376	4.64715e-06	TRUE	reported	textfile	8256	TRUE	0.00253444	20.9724	81.0769
	rs150565193	T	C	T	C	-0.248798	-0.011142	0.0195122	0.944311	FALSE	FALSE	FALSE	GVY4Ce	26721560	0.826128	0.0507217	TRUE	reported	textfile	0.0546598	5.32028e-06	TRUE	reported	textfile	8256	TRUE	0.00250322	20.7135	81.0769
	rs183176218	A	T	A	T	-0.173245	-0.0396219	0.0392564	0.0265729	FALSE	TRUE	FALSE	GVY4Ce	83825508	0.588448	0.0732264	TRUE	reported	textfile	0.0390076	8.94059e-06	TRUE	reported	textfile	8256	TRUE	0.00238351	19.7205	81.0769
	rs2229742	C	G	C	G	0.116801	0.0683195	0.0999389	0.111196	FALSE	TRUE	FALSE	GVY4Ce	14966851	0.0645952	0.0369685	TRUE	reported	textfile	0.0254704	4.52323e-06	TRUE	reported	textfile	8256	TRUE	0.00254066	21.024	81.0769
	rs2315488	A	G	A	G	-0.0871675	0.0118317	0.220711	0.804582	FALSE	FALSE	FALSE	GVY4Ce	139202403	0.689725	0.0296364	TRUE	reported	textfile	0.0184136	2.20296e-06	TRUE	reported	textfile	8256	TRUE	0.00270698	22.4041	81.0769
	rs2805103	A	T	A	T	0.0969957	0.0466179	0.70863	0.772942	FALSE	TRUE	FALSE	GVY4Ce	128836618	0.0966073	0.0280572	TRUE	reported	textfile	0.0168381	8.38658e-09	TRUE	reported	textfile	8256	TRUE	0.0040032	33.1752	81.0769
	rs28410020	C	G	C	G	0.0844789	-0.00380958	0.255178	0.208025	FALSE	TRUE	FALSE	GVY4Ce	3849751	0.895747	0.0290727	TRUE	reported	textfile	0.0176684	1.74121e-06	TRUE	reported	textfile	8256	TRUE	0.00276141	22.8558	81.0769
	rs3765719	C	T	C	T	0.126601	0.000752647	0.0864132	0.870337	FALSE	FALSE	FALSE	GVY4Ce	3687327	0.9835	0.0363933	TRUE	reported	textfile	0.0281066	6.65872e-06	TRUE	reported	textfile	8256	TRUE	0.00245144	20.2839	81.0769
	rs4150575	T	C	T	C	0.107027	-0.0101188	0.688358	0.288846	FALSE	FALSE	FALSE	GVY4Ce	18334919	0.695473	0.0258503	TRUE	reported	textfile	0.0165673	1.04616e-10	TRUE	reported	textfile	8256	TRUE	0.00502949	41.7232	81.0769
	rs490379	C	A	C	A	-0.133215	0.0391566	0.136264	0.907092	FALSE	FALSE	FALSE	GVY4Ce	88252216	0.329598	0.0401637	TRUE	reported	textfile	0.0219505	1.28793e-09	TRUE	reported	textfile	8256	TRUE	0.00444135	36.8224	81.0769
	rs61774831	A	C	A	C	0.317674	-0.0471756	0.0119251	0.985206	FALSE	FALSE	FALSE	GVY4Ce	53879416	0.629093	0.0976712	TRUE	reported	textfile	0.0703736	6.35844e-06	TRUE	reported	textfile	8256	TRUE	0.00246209	20.3722	81.0769
	rs61798917	A	G	A	G	0.0769112	-0.00538312	0.382142	0.730331	FALSE	FALSE	FALSE	GVY4Ce	89040410	0.839926	0.0266507	TRUE	reported	textfile	0.0155656	7.76861e-07	TRUE	reported	textfile	8256	TRUE	0.00294846	24.4086	81.0769
	rs72933650	T	C	T	C	0.132911	-0.045623	0.0722807	0.919676	FALSE	FALSE	FALSE	GVY4Ce	105879701	0.299309	0.0439564	TRUE	reported	textfile	0.0300497	9.73273e-06	TRUE	reported	textfile	8256	TRUE	0.00236398	19.5585	81.0769
	rs72943057	C	T	C	T	-0.219653	0.0786679	0.0234716	0.98838	FALSE	FALSE	FALSE	GVY4Ce	106574147	0.472939	0.10961	TRUE	reported	textfile	0.0494957	9.08721e-06	TRUE	reported	textfile	8256	TRUE	0.00237977	19.6895	81.0769
	rs7530513	A	G	A	G	0.397623	-0.0113039	0.50267	0.551511	FALSE	FALSE	FALSE	GVY4Ce	88944228	0.632467	0.0236356	TRUE	reported	textfile	0.0144873	7.70378e-166	TRUE	reported	textfile	8256	TRUE	0.0836136	753.118	81.0769
	rs7563086	T	C	T	C	0.14342	-0.0238406	0.0697089	0.93368	FALSE	FALSE	FALSE	GVY4Ce	46142357	0.615827	0.0475127	TRUE	reported	textfile	0.0297498	1.42921e-06	TRUE	reported	textfile	8256	TRUE	0.00280712	23.2352	81.0769
	rs9878908	T	C	T	C	-0.086292	0.0248341	0.795375	0.198299	FALSE	FALSE	FALSE	GVY4Ce	12260963	0.397283	0.0293379	TRUE	reported	textfile	0.0187632	4.24526e-06	TRUE	reported	textfile	8256	TRUE	0.00255533	21.1457	81.0769
GCST90199640	rs11260738	A	G	A	G	-0.0674824	-0.00619635	0.508619	0.42531	FALSE	FALSE	FALSE	GVY4Ce	16374298	0.794107	0.0237426	TRUE	reported	textfile	0.014947	6.33838e-06	TRUE	reported	textfile	8144	TRUE	0.0024966	20.3782	71.9226
	rs112807038	T	C	T	C	0.185925	0.0151706	0.0345951	0.981936	FALSE	FALSE	FALSE	GVY4Ce	14342105	0.86252	0.087607	TRUE	reported	textfile	0.0407482	5.04797e-06	TRUE	reported	textfile	8144	TRUE	0.00254984	20.8138	71.9226
	rs114708452	T	C	T	C	0.193902	-0.146671	0.0385138	0.98796	FALSE	FALSE	FALSE	GVY4Ce	146791475	0.164141	0.105422	TRUE	reported	textfile	0.039056	6.8796e-07	TRUE	reported	textfile	8144	TRUE	0.00301744	24.6424	71.9226
	rs11580678	T	G	T	G	-0.0749203	-0.0144548	0.329111	0.67742	FALSE	FALSE	FALSE	GVY4Ce	90159570	0.566173	0.0251959	TRUE	reported	textfile	0.0161818	3.65841e-06	TRUE	reported	textfile	8144	TRUE	0.00262522	21.4308	71.9226
	rs11787780	T	C	T	C	0.0743765	-0.00927021	0.285195	0.663092	FALSE	FALSE	FALSE	GVY4Ce	133589988	0.710521	0.0249765	TRUE	reported	textfile	0.0165161	6.69172e-06	TRUE	reported	textfile	8144	TRUE	0.00248393	20.2745	71.9226
	rs12145688	G	T	G	T	0.0783759	0.00752632	0.404815	0.571933	FALSE	FALSE	FALSE	GVY4Ce	16416847	0.751863	0.0238036	TRUE	reported	textfile	0.01516	2.34219e-07	TRUE	reported	textfile	8144	TRUE	0.00327119	26.7214	71.9226
	rs13107325	T	C	T	C	0.131282	0.11416	0.0736144	0.985913	FALSE	FALSE	FALSE	GVY4Ce	102267552	0.239269	0.0970077	TRUE	reported	textfile	0.0286355	4.54884e-06	TRUE	reported	textfile	8144	TRUE	0.00257421	21.0133	71.9226
	rs140852306	T	C	T	C	-0.128618	0.00700957	0.0768229	0.949004	FALSE	FALSE	FALSE	GVY4Ce	95736243	0.894751	0.0529846	TRUE	reported	textfile	0.0280679	4.59712e-06	TRUE	reported	textfile	8144	TRUE	0.00257174	20.9931	71.9226
	rs150629268	T	G	T	G	0.220045	0.0129534	0.0254143	0.976196	FALSE	FALSE	FALSE	GVY4Ce	24506353	0.867428	0.0775996	TRUE	reported	textfile	0.0478751	4.30212e-06	TRUE	reported	textfile	8144	TRUE	0.00258726	21.1201	71.9226
	rs151040866	A	G	A	G	-0.159233	0.0630639	0.0549247	0.966441	FALSE	FALSE	FALSE	GVY4Ce	6543550	0.336321	0.0655918	TRUE	reported	textfile	0.0326279	1.05939e-06	TRUE	reported	textfile	8144	TRUE	0.00291596	23.8112	71.9226
	rs3737704	C	A	C	A	-0.450808	0.0219604	0.55384	0.334686	FALSE	FALSE	FALSE	GVY4Ce	15487474	0.37923	0.0249744	TRUE	reported	textfile	0.0141416	1e-200	TRUE	reported	textfile	8144	TRUE	0.110938	1015.97	71.9226
	rs45622433	A	G	A	G	-0.392152	-0.052035	0.00786531	0.973121	FALSE	FALSE	FALSE	GVY4Ce	75023053	0.48435	0.0744075	TRUE	reported	textfile	0.0846735	3.63311e-06	TRUE	reported	textfile	8144	TRUE	0.00262684	21.4441	71.9226
	rs57389554	A	G	A	G	-0.14118	-0.00817786	0.0592876	0.918433	FALSE	FALSE	FALSE	GVY4Ce	151848216	0.849278	0.0430322	TRUE	reported	textfile	0.0313033	6.48089e-06	TRUE	reported	textfile	8144	TRUE	0.00249141	20.3357	71.9226
	rs61287921	A	G	A	G	-0.307334	-0.351248	0.0120779	0.997817	FALSE	FALSE	FALSE	GVY4Ce	89346157	0.192068	0.269261	TRUE	reported	textfile	0.06837	6.95176e-06	TRUE	reported	textfile	8144	TRUE	0.002475	20.2015	71.9226
	rs61991622	A	G	A	G	0.139752	-0.0215766	0.0647691	0.963919	FALSE	FALSE	FALSE	GVY4Ce	41384425	0.7335	0.0633725	TRUE	reported	textfile	0.0309457	6.30045e-06	TRUE	reported	textfile	8144	TRUE	0.00249799	20.3896	71.9226
	rs706151	G	A	G	A	0.0669338	0.00218208	0.467889	0.528277	FALSE	FALSE	FALSE	GVY4Ce	134425414	0.92663	0.0236963	TRUE	reported	textfile	0.0149986	8.09437e-06	TRUE	reported	textfile	8144	TRUE	0.00243944	19.9105	71.9226
	rs72632963	C	T	C	T	-0.272225	0.00578545	0.0149686	0.93717	FALSE	FALSE	FALSE	GVY4Ce	12411139	0.904308	0.0481235	TRUE	reported	textfile	0.0611352	8.47468e-06	TRUE	reported	textfile	8144	TRUE	0.00242873	19.8229	71.9226
	rs7380998	G	A	G	A	-0.179866	-0.0753472	0.961782	0.021279	FALSE	FALSE	FALSE	GVY4Ce	112609807	0.358341	0.08203	TRUE	reported	textfile	0.0385778	3.12531e-06	TRUE	reported	textfile	8144	TRUE	0.00266212	21.7328	71.9226
	rs77951681	C	T	C	T	0.101923	0.0393637	0.138948	0.910554	FALSE	FALSE	FALSE	GVY4Ce	21587191	0.345582	0.0417344	TRUE	reported	textfile	0.021744	2.76668e-06	TRUE	reported	textfile	8144	TRUE	0.00269065	21.9664	71.9226
	rs7969761	T	C	T	C	0.0903542	-0.0120449	0.545855	0.443206	FALSE	FALSE	FALSE	GVY4Ce	246676	0.611359	0.0237041	TRUE	reported	textfile	0.0151665	2.56147e-09	TRUE	reported	textfile	8144	TRUE	0.0043391	35.4829	71.9226
GCST90199641	rs10898981	C	A	C	A	0.0773381	-0.0384609	0.678023	0.271134	FALSE	FALSE	FALSE	GVY4Ce	74381420	0.144938	0.0263856	TRUE	reported	textfile	0.0164678	2.64893e-06	TRUE	reported	textfile	7988	TRUE	0.00275347	22.0499	21.0528
	rs111273747	G	A	G	A	0.349979	-0.0666798	0.010158	0.99112	FALSE	FALSE	FALSE	GVY4Ce	54160481	0.599549	0.126997	TRUE	reported	textfile	0.0761519	4.31095e-06	TRUE	reported	textfile	7988	TRUE	0.00263717	21.1161	21.0528
	rs116932970	C	A	C	A	0.16785	-0.0145734	0.042454	0.960291	FALSE	FALSE	FALSE	GVY4Ce	18070390	0.809832	0.0605603	TRUE	reported	textfile	0.0379049	9.50326e-06	TRUE	reported	textfile	7988	TRUE	0.00244878	19.6039	21.0528
	rs117910752	G	A	G	A	0.185814	0.0425357	0.0415035	0.976908	FALSE	FALSE	FALSE	GVY4Ce	37721648	0.578955	0.0766533	TRUE	reported	textfile	0.0381401	1.10542e-06	TRUE	reported	textfile	7988	TRUE	0.00296256	23.7293	21.0528
	rs12050756	G	A	G	A	0.199795	0.0652518	0.0314485	0.868591	FALSE	FALSE	FALSE	GVY4Ce	32792425	0.0629071	0.0350845	TRUE	reported	textfile	0.0437976	5.07208e-06	TRUE	reported	textfile	7988	TRUE	0.00259837	20.8046	21.0528
	rs12092559	T	G	T	G	-0.106219	-0.0813214	0.118985	0.878663	FALSE	FALSE	FALSE	GVY4Ce	53119153	0.0243484	0.0361173	TRUE	reported	textfile	0.0234488	5.9031e-06	TRUE	reported	textfile	7988	TRUE	0.00256219	20.5142	21.0528
	rs140946796	G	T	G	T	0.373006	-0.23343	0.00899371	0.997457	FALSE	FALSE	FALSE	GVY4Ce	13141142	0.308436	0.229188	TRUE	reported	textfile	0.0808908	4.00306e-06	TRUE	reported	textfile	7988	TRUE	0.00265485	21.2581	21.0528
	rs141615044	A	C	A	C	0.336958	0.00507511	0.010653	0.9697	FALSE	FALSE	FALSE	GVY4Ce	129612425	0.940329	0.0677983	TRUE	reported	textfile	0.0744002	5.92643e-06	TRUE	reported	textfile	7988	TRUE	0.00256125	20.5066	21.0528
	rs150551895	T	C	T	C	0.264587	0.0248665	0.0176136	0.99471	FALSE	FALSE	FALSE	GVY4Ce	17149914	0.87809	0.162111	TRUE	reported	textfile	0.0586271	6.39044e-06	TRUE	reported	textfile	7988	TRUE	0.00254329	20.3625	21.0528
	rs1561398	T	C	T	C	-0.0832245	0.00857013	0.252229	0.823305	FALSE	FALSE	FALSE	GVY4Ce	72190958	0.783928	0.0312546	TRUE	reported	textfile	0.0178383	3.07873e-06	TRUE	reported	textfile	7988	TRUE	0.00271754	21.7614	21.0528
	rs189957470	T	C	T	C	-0.288782	0.00626684	0.0160574	0.968517	FALSE	FALSE	FALSE	GVY4Ce	56534866	0.928329	0.0696721	TRUE	reported	textfile	0.0611897	2.36482e-06	TRUE	reported	textfile	7988	TRUE	0.00278059	22.2677	21.0528
	rs1959120	T	A	T	A	-0.071683	-0.0811458	0.426814	0.394597	FALSE	TRUE	TRUE	GVY4Ce	101101893	0.000906713	0.0244564	TRUE	reported	textfile	0.0156366	4.55502e-06	TRUE	reported	textfile	7988	FALSE	0.00262403	21.0106	21.0528
	rs62391856	T	C	T	C	0.0882028	-0.0358557	0.215529	0.728319	FALSE	FALSE	FALSE	GVY4Ce	126449075	0.183804	0.0269768	TRUE	reported	textfile	0.0192251	4.47738e-06	TRUE	reported	textfile	7988	TRUE	0.00262813	21.0435	21.0528
	rs6539427	C	T	C	T	-0.0846334	0.0254555	0.220234	0.709549	FALSE	FALSE	FALSE	GVY4Ce	108450527	0.326283	0.0259319	TRUE	reported	textfile	0.0184289	4.38124e-06	TRUE	reported	textfile	7988	TRUE	0.00263331	21.0851	21.0528
	rs7510321	C	T	C	T	0.0811601	0.0362473	0.771942	0.24454	FALSE	FALSE	FALSE	GVY4Ce	31524330	0.184977	0.0273444	TRUE	reported	textfile	0.0183015	9.22398e-06	TRUE	reported	textfile	7988	TRUE	0.00245587	19.6609	21.0528
	rs9491556	T	C	T	C	0.419107	0.0823019	0.00679673	0.997566	FALSE	FALSE	FALSE	GVY4Ce	98429880	0.717097	0.227139	TRUE	reported	textfile	0.0935382	7.44346e-06	TRUE	reported	textfile	7988	TRUE	0.00250694	20.0707	21.0528
GCST90199642	rs111422112	C	T	C	T	0.342769	-0.0483763	0.010822	0.986354	FALSE	FALSE	FALSE	GVY4Ce	23574266	0.661289	0.110414	TRUE	reported	textfile	0.075336	5.36802e-06	TRUE	reported	textfile	8128	TRUE	0.00254044	20.6962	31.1899
	rs111534509	A	G	A	G	0.157601	-0.0363769	0.0533091	0.891868	FALSE	FALSE	FALSE	GVY4Ce	97927918	0.337	0.0378883	TRUE	reported	textfile	0.034992	6.67078e-06	TRUE	reported	textfile	8128	TRUE	0.00248951	20.2803	31.1899
	rs113682909	C	G	C	G	-0.405067	-0.0320738	0.00939639	0.0349426	FALSE	TRUE	FALSE	GVY4Ce	67846768	0.624589	0.0655428	TRUE	reported	textfile	0.0804974	4.85273e-07	TRUE	reported	textfile	8128	TRUE	0.00310567	25.3153	31.1899
	rs115232717	G	A	G	A	-0.516457	0.0510329	0.0059106	0.992939	FALSE	FALSE	FALSE	GVY4Ce	62246077	0.723321	0.144151	TRUE	reported	textfile	0.0995462	2.12436e-07	TRUE	reported	textfile	8128	TRUE	0.00330065	26.9099	31.1899
	rs117035597	A	C	A	C	-0.164258	-0.0596153	0.0453645	0.943332	FALSE	FALSE	FALSE	GVY4Ce	36220843	0.244349	0.0512077	TRUE	reported	textfile	0.0368759	8.41487e-06	TRUE	reported	textfile	8128	TRUE	0.00243515	19.8363	31.1899
	rs117587050	C	T	C	T	0.301156	-0.108298	0.015144	0.959962	FALSE	FALSE	FALSE	GVY4Ce	105893774	0.0827694	0.0624257	TRUE	reported	textfile	0.0631777	1.87162e-06	TRUE	reported	textfile	8128	TRUE	0.00278779	22.7169	31.1899
	rs12144476	C	T	C	T	0.222626	-0.133929	0.0264037	0.986524	FALSE	FALSE	FALSE	GVY4Ce	184922992	0.189561	0.102089	TRUE	reported	textfile	0.0482583	3.96485e-06	TRUE	reported	textfile	8128	TRUE	0.00261149	21.2765	31.1899
	rs12625462	A	G	A	G	0.100419	0.00785758	0.141742	0.919593	FALSE	FALSE	FALSE	GVY4Ce	860453	0.855439	0.0431301	TRUE	reported	textfile	0.0222218	6.21488e-06	TRUE	reported	textfile	8128	TRUE	0.00250611	20.4158	31.1899
	rs13046014	C	G	C	G	0.143955	-0.0575083	0.0710291	0.0443004	FALSE	TRUE	FALSE	GVY4Ce	23833029	0.311212	0.0567882	TRUE	reported	textfile	0.0298658	1.43512e-06	TRUE	reported	textfile	8128	TRUE	0.00285024	23.2273	31.1899
	rs13100424	G	C	G	C	0.294562	-0.0383176	0.0200999	0.0185502	FALSE	TRUE	FALSE	GVY4Ce	62130041	0.661509	0.0875171	TRUE	reported	textfile	0.0550166	8.60081e-08	TRUE	reported	textfile	8128	TRUE	0.00351442	28.6589	31.1899
	rs1420467	A	G	A	G	0.0920482	-0.0152455	0.792493	0.192841	FALSE	FALSE	FALSE	GVY4Ce	169009292	0.608216	0.0297402	TRUE	reported	textfile	0.0191097	1.45859e-06	TRUE	reported	textfile	8128	TRUE	0.00284643	23.1962	31.1899
	rs142220999	T	C	T	C	0.334271	-0.0590669	0.0109313	0.99383	FALSE	FALSE	FALSE	GVY4Ce	18476449	0.690254	0.14822	TRUE	reported	textfile	0.0744908	7.20911e-06	TRUE	reported	textfile	8128	TRUE	0.00247135	20.1319	31.1899
	rs144424724	T	C	T	C	-0.331572	-0.134261	0.0110974	0.996058	FALSE	FALSE	FALSE	GVY4Ce	3631189	0.507342	0.202511	TRUE	reported	textfile	0.0738799	7.18982e-06	TRUE	reported	textfile	8128	TRUE	0.00247198	20.1371	31.1899
	rs145095548	C	A	C	A	0.524916	-0.0393495	0.00468731	0.96613	FALSE	FALSE	FALSE	GVY4Ce	80786850	0.554123	0.0665144	TRUE	reported	textfile	0.112951	3.363e-06	TRUE	reported	textfile	8128	TRUE	0.00265011	21.592	31.1899
	rs183901354	T	C	T	C	-0.901248	-0.0242901	0.00166482	0.945741	FALSE	FALSE	FALSE	GVY4Ce	32328310	0.648207	0.0532382	TRUE	reported	textfile	0.188913	1.83581e-06	TRUE	reported	textfile	8128	TRUE	0.00279233	22.754	31.1899
	rs186730428	G	A	G	A	-0.0721017	0.00873642	0.377822	0.685446	FALSE	FALSE	FALSE	GVY4Ce	119601173	0.731353	0.0254464	TRUE	reported	textfile	0.0158572	5.44296e-06	TRUE	reported	textfile	8128	TRUE	0.00253718	20.6696	31.1899
	rs2186050	C	G	C	G	-0.0781457	0.0176836	0.355675	0.384877	FALSE	TRUE	FALSE	GVY4Ce	129603702	0.466938	0.0243084	TRUE	reported	textfile	0.0165737	2.41664e-06	TRUE	reported	textfile	8128	TRUE	0.00272773	22.2262	31.1899
	rs2744764	T	C	T	C	0.117358	-0.0197006	0.0960564	0.900989	FALSE	FALSE	FALSE	GVY4Ce	25722122	0.613551	0.0390103	TRUE	reported	textfile	0.0259235	5.98024e-06	TRUE	reported	textfile	8128	TRUE	0.00251513	20.4895	31.1899
	rs34552467	C	A	C	A	0.0748839	0.0425452	0.329207	0.679403	FALSE	FALSE	FALSE	GVY4Ce	88476287	0.0929501	0.0253239	TRUE	reported	textfile	0.0166187	6.60635e-06	TRUE	reported	textfile	8128	TRUE	0.00249181	20.2991	31.1899
	rs3845611	G	T	G	T	-0.104901	-0.0283426	0.13437	0.833287	FALSE	FALSE	FALSE	GVY4Ce	13580483	0.371081	0.0316872	TRUE	reported	textfile	0.0226947	3.79543e-06	TRUE	reported	textfile	8128	TRUE	0.00262172	21.3601	31.1899
	rs60688348	C	A	C	A	0.0788168	0.00186545	0.263264	0.644932	FALSE	FALSE	FALSE	GVY4Ce	157052597	0.939879	0.0247334	TRUE	reported	textfile	0.0175391	6.99747e-06	TRUE	reported	textfile	8128	TRUE	0.00247834	20.1891	31.1899
	rs62058095	C	G	C	G	-0.355229	0.158559	0.00930835	0.00655065	FALSE	TRUE	FALSE	GVY4Ce	57525201	0.275326	0.14535	TRUE	reported	textfile	0.07998	8.93446e-06	TRUE	reported	textfile	8128	TRUE	0.00242113	19.7218	31.1899
	rs7190382	T	A	T	A	-0.0809751	0.0220877	0.643304	0.682321	FALSE	TRUE	FALSE	GVY4Ce	77504386	0.383328	0.0253363	TRUE	reported	textfile	0.0163858	7.74104e-07	TRUE	reported	textfile	8128	TRUE	0.00299558	24.4152	31.1899
	rs7252227	T	G	T	G	-0.0705068	0.0196307	0.581229	0.343955	FALSE	FALSE	FALSE	GVY4Ce	40795210	0.425988	0.0246594	TRUE	reported	textfile	0.0155659	5.90998e-06	TRUE	reported	textfile	8128	TRUE	0.00251788	20.5119	31.1899
	rs72688441	A	G	A	G	-0.603321	0.0164787	0.0538338	0.886748	FALSE	FALSE	FALSE	GVY4Ce	45585381	0.658608	0.037296	TRUE	reported	textfile	0.0335227	2.04224e-72	TRUE	reported	textfile	8128	TRUE	0.0383234	323.826	31.1899
	rs72722075	T	C	T	C	-0.141262	0.000507444	0.123722	0.872395	FALSE	FALSE	FALSE	GVY4Ce	45031276	0.988613	0.0355553	TRUE	reported	textfile	0.0235479	1.98631e-09	TRUE	reported	textfile	8128	TRUE	0.00440802	35.9782	31.1899
	rs73217598	A	G	A	G	0.307856	0.0323235	0.0144704	0.988762	FALSE	FALSE	FALSE	GVY4Ce	14190551	0.771148	0.111126	TRUE	reported	textfile	0.0648737	2.08033e-06	TRUE	reported	textfile	8128	TRUE	0.00276295	22.5139	31.1899
	rs73248229	G	T	G	T	-0.190145	-0.0732137	0.0358819	0.977648	FALSE	FALSE	FALSE	GVY4Ce	41028911	0.344093	0.077384	TRUE	reported	textfile	0.0417423	5.23327e-06	TRUE	reported	textfile	8128	TRUE	0.0025464	20.7448	31.1899
	rs73317157	A	G	A	G	-0.122647	0.0277142	0.0875741	0.960171	FALSE	FALSE	FALSE	GVY4Ce	66992819	0.64886	0.0608639	TRUE	reported	textfile	0.0273357	7.23375e-06	TRUE	reported	textfile	8128	TRUE	0.00247056	20.1255	31.1899
	rs74995512	A	G	A	G	-0.331117	-0.0246465	0.0113902	0.990069	FALSE	FALSE	FALSE	GVY4Ce	54360165	0.839347	0.121574	TRUE	reported	textfile	0.0720991	4.37895e-06	TRUE	reported	textfile	8128	TRUE	0.00258818	21.0861	31.1899
	rs77703857	T	C	T	C	0.191571	0.00542399	0.0350223	0.972333	FALSE	FALSE	FALSE	GVY4Ce	13054916	0.941929	0.0744592	TRUE	reported	textfile	0.0432535	9.46597e-06	TRUE	reported	textfile	8128	TRUE	0.00240761	19.6115	31.1899
	rs77987208	C	T	C	T	-0.117677	-0.0772918	0.132946	0.827194	FALSE	FALSE	FALSE	GVY4Ce	4758793	0.0127207	0.0310222	TRUE	reported	textfile	0.0227397	2.27943e-07	TRUE	reported	textfile	8128	TRUE	0.00328399	26.7736	31.1899
	rs7903429	T	C	T	C	0.0970626	-0.067654	0.170385	0.805877	FALSE	FALSE	FALSE	GVY4Ce	68178595	0.0229182	0.0297406	TRUE	reported	textfile	0.0205295	2.268e-06	TRUE	reported	textfile	8128	TRUE	0.00274265	22.3481	31.1899
	rs80012250	G	A	G	A	-0.164302	-0.057849	0.0478994	0.969161	FALSE	FALSE	FALSE	GVY4Ce	8248643	0.406024	0.0696213	TRUE	reported	textfile	0.0363521	6.19202e-06	TRUE	reported	textfile	8128	TRUE	0.00250699	20.423	31.1899
GCST90199643	rs115155467	G	A	G	A	-0.460446	-0.0691973	0.00815257	0.984979	FALSE	FALSE	FALSE	GVY4Ce	22060895	0.481583	0.0983254	TRUE	reported	textfile	0.0942028	1.0196e-06	TRUE	reported	textfile	6877	TRUE	0.00346198	23.8838	21.4025
	rs115480587	G	A	G	A	-0.243568	-0.0316205	0.024909	0.965057	FALSE	FALSE	FALSE	GVY4Ce	35291120	0.622287	0.0641894	TRUE	reported	textfile	0.0535613	5.42975e-06	TRUE	reported	textfile	6877	TRUE	0.00299802	20.6734	21.4025
	rs118040844	A	T	A	T	0.429065	-0.0681998	0.00810253	0.00310877	FALSE	TRUE	FALSE	GVY4Ce	14355668	0.738717	0.204465	TRUE	reported	textfile	0.0950748	6.39414e-06	TRUE	reported	textfile	6877	TRUE	0.00295279	20.3605	21.4025
	rs13101279	A	G	A	G	0.0770005	-0.00781473	0.608785	0.304318	FALSE	FALSE	FALSE	GVY4Ce	43747301	0.759069	0.0254796	TRUE	reported	textfile	0.0172893	8.44267e-06	TRUE	reported	textfile	6877	TRUE	0.00287596	19.8292	21.4025
	rs146174820	A	G	A	G	-0.286214	0.0738001	0.0197154	0.992312	FALSE	FALSE	FALSE	GVY4Ce	68387100	0.602569	0.14173	TRUE	reported	textfile	0.0611534	2.86509e-06	TRUE	reported	textfile	6877	TRUE	0.00317512	21.8985	21.4025
	rs2155345	T	G	T	G	-0.0810837	0.0157582	0.318609	0.697133	FALSE	FALSE	FALSE	GVY4Ce	106056961	0.542472	0.0258722	TRUE	reported	textfile	0.0182146	8.52414e-06	TRUE	reported	textfile	6877	TRUE	0.00287329	19.8108	21.4025
	rs2290258	C	A	C	A	0.124683	-0.0806378	0.106372	0.921959	FALSE	FALSE	FALSE	GVY4Ce	99400611	0.0684416	0.0442558	TRUE	reported	textfile	0.0274227	5.44905e-06	TRUE	reported	textfile	6877	TRUE	0.00299703	20.6665	21.4025
	rs2351511	T	C	T	C	0.322661	-0.0236065	0.985905	0.0076	FALSE	FALSE	FALSE	GVY4Ce	61082729	0.86569	0.139571	TRUE	reported	textfile	0.0724084	8.3451e-06	TRUE	reported	textfile	6877	TRUE	0.00287915	19.8513	21.4025
	rs3132031	C	G	C	G	0.136212	-0.00457608	0.083724	0.106582	FALSE	TRUE	FALSE	GVY4Ce	114219580	0.904829	0.0382733	TRUE	reported	textfile	0.0306465	8.80501e-06	TRUE	reported	textfile	6877	TRUE	0.00286434	19.7489	21.4025
	rs55917677	T	C	T	C	0.0908851	-0.00667199	0.234824	0.730175	FALSE	FALSE	FALSE	GVY4Ce	153779899	0.801265	0.0265066	TRUE	reported	textfile	0.0199131	5.01701e-06	TRUE	reported	textfile	6877	TRUE	0.00301992	20.8248	21.4025
	rs60930884	G	T	G	T	-0.127602	0.0149829	0.0979532	0.890638	FALSE	FALSE	FALSE	GVY4Ce	70517313	0.690572	0.0376379	TRUE	reported	textfile	0.028606	8.16974e-06	TRUE	reported	textfile	6877	TRUE	0.00288501	19.8918	21.4025
	rs62448268	A	G	A	G	0.0953227	-0.0329727	0.206154	0.758887	FALSE	FALSE	FALSE	GVY4Ce	22789845	0.228858	0.0274018	TRUE	reported	textfile	0.0205955	3.68649e-06	TRUE	reported	textfile	6877	TRUE	0.00310526	21.4152	21.4025
	rs73153108	T	C	T	C	0.230561	-0.0525803	0.027794	0.987033	FALSE	FALSE	FALSE	GVY4Ce	27092670	0.608447	0.102638	TRUE	reported	textfile	0.0515713	7.7958e-06	TRUE	reported	textfile	6877	TRUE	0.00289798	19.9816	21.4025
	rs7403557	G	A	G	A	0.101229	0.0111553	0.731422	0.332009	FALSE	FALSE	FALSE	GVY4Ce	27057832	0.65579	0.0250268	TRUE	reported	textfile	0.019175	1.29754e-07	TRUE	reported	textfile	6877	TRUE	0.0040363	27.862	21.4025
	rs74927400	T	C	T	C	0.330046	-0.0442706	0.0157956	0.980763	FALSE	FALSE	FALSE	GVY4Ce	75231821	0.60381	0.0853112	TRUE	reported	textfile	0.0678883	1.16438e-06	TRUE	reported	textfile	6877	TRUE	0.00342507	23.6283	21.4025
	rs75878687	C	G	C	G	0.274662	-0.0681066	0.0193798	0.0162063	FALSE	TRUE	FALSE	GVY4Ce	7721779	0.456172	0.0913981	TRUE	reported	textfile	0.0617298	8.61017e-06	TRUE	reported	textfile	6877	TRUE	0.00287052	19.7916	21.4025
	rs7687207	G	A	G	A	0.0783161	0.00122847	0.548944	0.343805	FALSE	FALSE	FALSE	GVY4Ce	89128817	0.960537	0.0248276	TRUE	reported	textfile	0.0172861	5.88215e-06	TRUE	reported	textfile	6877	TRUE	0.00297588	20.5202	21.4025
	rs76962381	T	C	T	C	-0.10889	-0.0516991	0.207403	0.869509	FALSE	FALSE	FALSE	GVY4Ce	58264401	0.138566	0.0349046	TRUE	reported	textfile	0.0207547	1.55001e-07	TRUE	reported	textfile	6877	TRUE	0.00398666	27.518	21.4025
	rs80078071	A	G	A	G	0.0973519	-0.0313252	0.191709	0.75105	FALSE	FALSE	FALSE	GVY4Ce	180100099	0.255583	0.0275533	TRUE	reported	textfile	0.0216891	7.17216e-06	TRUE	reported	textfile	6877	TRUE	0.00292103	20.1409	21.4025
	rs9514591	C	T	C	T	-0.0820086	-0.010956	0.299417	0.723557	FALSE	FALSE	FALSE	GVY4Ce	106902887	0.676854	0.0262886	TRUE	reported	textfile	0.0184498	8.79046e-06	TRUE	reported	textfile	6877	TRUE	0.00286477	19.7519	21.4025
GCST90199644	rs113666924	A	G	A	G	-0.199128	0.04457	0.0343297	0.922181	FALSE	FALSE	FALSE	GVY4Ce	40846014	0.312253	0.0441066	TRUE	reported	textfile	0.043086	3.80707e-06	TRUE	reported	textfile	8137	TRUE	0.00261812	21.3543	22.7565
	rs115810418	T	A	T	A	0.173537	-0.138171	0.0458835	0.0154551	FALSE	TRUE	FALSE	GVY4Ce	105327409	0.133178	0.0920109	TRUE	reported	textfile	0.0370651	2.84155e-06	TRUE	reported	textfile	8137	TRUE	0.00268671	21.9153	22.7565
	rs11653172	G	A	G	A	-0.0719812	-0.00802289	0.507309	0.428654	FALSE	FALSE	FALSE	GVY4Ce	12739959	0.736904	0.0238808	TRUE	reported	textfile	0.0161773	8.6063e-06	TRUE	reported	textfile	8137	TRUE	0.0024272	19.7934	22.7565
	rs11657948	A	G	A	G	0.119169	-0.045719	0.0951605	0.933096	FALSE	FALSE	FALSE	GVY4Ce	9168331	0.334839	0.047406	TRUE	reported	textfile	0.026931	9.6448e-06	TRUE	reported	textfile	8137	TRUE	0.00240057	19.5756	22.7565
	rs116892987	A	G	A	G	-0.329003	-0.208764	0.0122552	0.997579	FALSE	FALSE	FALSE	GVY4Ce	102527357	0.379092	0.237348	TRUE	reported	textfile	0.0711461	3.758e-06	TRUE	reported	textfile	8137	TRUE	0.00262116	21.3792	22.7565
	rs117966480	C	A	C	A	-0.322677	-0.0702035	0.0145231	0.989343	FALSE	FALSE	FALSE	GVY4Ce	126819947	0.526486	0.11084	TRUE	reported	textfile	0.0654721	8.28759e-07	TRUE	reported	textfile	8137	TRUE	0.00297622	24.2838	22.7565
	rs12431055	T	C	T	C	0.128412	0.0552171	0.0798941	0.937787	FALSE	FALSE	FALSE	GVY4Ce	29639326	0.259995	0.0490208	TRUE	reported	textfile	0.0287893	8.17999e-06	TRUE	reported	textfile	8137	TRUE	0.00243907	19.8903	22.7565
	rs12549440	T	C	T	C	0.0794261	0.028058	0.34769	0.56883	FALSE	FALSE	FALSE	GVY4Ce	122576372	0.238603	0.0238086	TRUE	reported	textfile	0.0165038	1.48987e-06	TRUE	reported	textfile	8137	TRUE	0.00283831	23.1554	22.7565
	rs13065149	T	G	T	G	-0.0774221	0.0157077	0.416893	0.531777	FALSE	FALSE	FALSE	GVY4Ce	176871340	0.505889	0.0236117	TRUE	reported	textfile	0.0160933	1.50311e-06	TRUE	reported	textfile	8137	TRUE	0.00283623	23.1384	22.7565
	rs139776	T	C	T	C	-0.0834689	0.0265629	0.332129	0.687804	FALSE	FALSE	FALSE	GVY4Ce	24917479	0.298338	0.0255412	TRUE	reported	textfile	0.0169698	8.7129e-07	TRUE	reported	textfile	8137	TRUE	0.00296444	24.1874	22.7565
	rs144661998	A	G	A	G	0.0958879	-0.0214086	0.159529	0.885135	FALSE	FALSE	FALSE	GVY4Ce	105655335	0.563974	0.0371066	TRUE	reported	textfile	0.0213092	6.80036e-06	TRUE	reported	textfile	8137	TRUE	0.00248227	20.2435	22.7565
	rs147824813	G	T	G	T	0.298848	0.092845	0.0136067	0.983251	FALSE	FALSE	FALSE	GVY4Ce	127259371	0.321152	0.0935849	TRUE	reported	textfile	0.0673004	8.9747e-06	TRUE	reported	textfile	8137	TRUE	0.00241741	19.7133	22.7565
	rs150576152	G	A	G	A	0.207064	-0.0497593	0.0301517	0.966209	FALSE	FALSE	FALSE	GVY4Ce	62851995	0.450092	0.0658835	TRUE	reported	textfile	0.0456525	5.7426e-06	TRUE	reported	textfile	8137	TRUE	0.00252185	20.5671	22.7565
	rs2529273	T	C	T	C	0.101541	-0.0259625	0.726808	0.219728	FALSE	FALSE	FALSE	GVY4Ce	74873835	0.366034	0.0287219	TRUE	reported	textfile	0.0178971	1.39856e-08	TRUE	reported	textfile	8137	TRUE	0.00394038	32.1818	22.7565
	rs2628473	C	G	C	G	0.0753681	0.00137621	0.306775	0.264634	FALSE	TRUE	FALSE	GVY4Ce	88810258	0.95902	0.0267831	TRUE	reported	textfile	0.0169935	9.20294e-06	TRUE	reported	textfile	8137	TRUE	0.00241155	19.6654	22.7565
	rs35155698	C	T	C	T	0.0750576	-0.036654	0.300798	0.680642	FALSE	FALSE	FALSE	GVY4Ce	895304	0.150129	0.0254706	TRUE	reported	textfile	0.0169732	9.77406e-06	TRUE	reported	textfile	8137	TRUE	0.00239748	19.5504	22.7565
	rs56113850	C	T	C	T	-0.105914	0.0423974	0.576193	0.436431	FALSE	FALSE	FALSE	GVY4Ce	40847202	0.0799374	0.0242126	TRUE	reported	textfile	0.0155754	1.04562e-11	TRUE	reported	textfile	8137	TRUE	0.00565071	46.2298	22.7565
	rs62205691	A	G	A	G	-0.282897	-0.0632181	0.0153181	0.992252	FALSE	FALSE	FALSE	GVY4Ce	57241225	0.624481	0.129146	TRUE	reported	textfile	0.0634126	8.15002e-06	TRUE	reported	textfile	8137	TRUE	0.00243995	19.8975	22.7565
	rs62462718	A	G	A	G	-0.0777005	0.061627	0.317824	0.671576	FALSE	FALSE	FALSE	GVY4Ce	63832020	0.0149269	0.0253177	TRUE	reported	textfile	0.0173769	7.76761e-06	TRUE	reported	textfile	8137	TRUE	0.00245117	19.9892	22.7565
	rs6497692	T	C	T	C	0.0748062	0.000348706	0.431385	0.643874	FALSE	FALSE	FALSE	GVY4Ce	23868061	0.988667	0.0245487	TRUE	reported	textfile	0.0156289	1.69789e-06	TRUE	reported	textfile	8137	TRUE	0.00280759	22.904	22.7565
	rs6569661	G	A	G	A	-0.0859588	-0.0068362	0.726404	0.319454	FALSE	FALSE	FALSE	GVY4Ce	130185619	0.787528	0.0253642	TRUE	reported	textfile	0.0178126	1.39498e-06	TRUE	reported	textfile	8137	TRUE	0.00285378	23.2819	22.7565
	rs6669746	A	G	A	G	0.0701676	0.0081951	0.483722	0.516445	FALSE	FALSE	FALSE	GVY4Ce	15027271	0.727436	0.0235127	TRUE	reported	textfile	0.0154489	5.57445e-06	TRUE	reported	textfile	8137	TRUE	0.0025288	20.6239	22.7565
	rs6878843	T	G	T	G	0.11814	-0.0152342	0.0981603	0.873768	FALSE	FALSE	FALSE	GVY4Ce	103831871	0.668718	0.0356015	TRUE	reported	textfile	0.0259449	5.27622e-06	TRUE	reported	textfile	8137	TRUE	0.00254168	20.7292	22.7565
	rs72870405	A	T	A	T	-0.15323	0.0833119	0.0614672	0.0819174	FALSE	TRUE	FALSE	GVY4Ce	162080573	0.0513417	0.0427545	TRUE	reported	textfile	0.0326215	2.63736e-06	TRUE	reported	textfile	8137	TRUE	0.0027042	22.0583	22.7565
	rs7485735	C	T	C	T	-0.0794824	0.00801772	0.686925	0.201816	FALSE	FALSE	FALSE	GVY4Ce	71325737	0.784298	0.0292915	TRUE	reported	textfile	0.0175283	5.77336e-06	TRUE	reported	textfile	8137	TRUE	0.00252059	20.5568	22.7565
	rs79880362	T	C	T	C	0.146943	0.0941502	0.0745231	0.956526	FALSE	FALSE	FALSE	GVY4Ce	125202033	0.110945	0.0590668	TRUE	reported	textfile	0.0295016	6.33111e-07	TRUE	reported	textfile	8137	TRUE	0.00303963	24.8028	22.7565
GCST90199645	rs112388569	T	C	T	C	-0.298781	0.0333197	0.0132667	0.983222	FALSE	FALSE	FALSE	GVY4Ce	7138269	0.715707	0.0914864	TRUE	reported	textfile	0.0671713	8.66557e-06	TRUE	reported	textfile	8200	TRUE	0.00240701	19.7803	22.1004
	rs114371828	T	C	T	C	-0.267108	0.0075925	0.0166605	0.994442	FALSE	FALSE	FALSE	GVY4Ce	201989140	0.961317	0.156545	TRUE	reported	textfile	0.0601557	8.98427e-06	TRUE	reported	textfile	8200	TRUE	0.00239863	19.7113	22.1004
	rs115520044	A	G	A	G	0.330168	-0.0374773	0.0166095	0.989953	FALSE	FALSE	FALSE	GVY4Ce	49488289	0.759142	0.122232	TRUE	reported	textfile	0.0606751	5.28093e-08	TRUE	reported	textfile	8200	TRUE	0.00359807	29.6035	22.1004
	rs116020639	C	T	C	T	-0.316022	-0.113703	0.0157528	0.995027	FALSE	FALSE	FALSE	GVY4Ce	64880349	0.489632	0.164574	TRUE	reported	textfile	0.0623683	4.04057e-07	TRUE	reported	textfile	8200	TRUE	0.0031213	25.6685	22.1004
	rs140759816	A	T	A	T	-0.186302	-0.10668	0.0375843	0.0189225	FALSE	TRUE	FALSE	GVY4Ce	16902686	0.206971	0.0845363	TRUE	reported	textfile	0.0405924	4.44137e-06	TRUE	reported	textfile	8200	TRUE	0.00256223	21.0591	22.1004
	rs145444661	T	C	T	C	-0.329336	-0.144904	0.0131884	0.990672	FALSE	FALSE	FALSE	GVY4Ce	43137607	0.248737	0.12563	TRUE	reported	textfile	0.0679412	1.25107e-06	TRUE	reported	textfile	8200	TRUE	0.0028573	23.4912	22.1004
	rs1594297	A	G	A	G	0.224925	-0.00986266	0.974516	0.033525	FALSE	FALSE	FALSE	GVY4Ce	16476976	0.879568	0.0650931	TRUE	reported	textfile	0.0505211	8.50366e-06	TRUE	reported	textfile	8200	TRUE	0.00241139	19.8164	22.1004
	rs183574340	A	G	A	G	-0.415375	-0.0517336	0.00850881	0.972777	FALSE	FALSE	FALSE	GVY4Ce	12699211	0.482339	0.0736372	TRUE	reported	textfile	0.0834702	6.48022e-07	TRUE	reported	textfile	8200	TRUE	0.00301089	24.7578	22.1004
	rs186185553	T	C	T	C	-0.255397	-0.226199	0.0190144	0.99104	FALSE	FALSE	FALSE	GVY4Ce	57944141	0.0656463	0.122879	TRUE	reported	textfile	0.0568661	7.08223e-06	TRUE	reported	textfile	8200	TRUE	0.00245383	20.166	22.1004
	rs2108740	A	C	A	C	-0.169235	-0.0125427	0.0446539	0.961536	FALSE	FALSE	FALSE	GVY4Ce	13876053	0.842046	0.0629414	TRUE	reported	textfile	0.0373631	5.91354e-06	TRUE	reported	textfile	8200	TRUE	0.00249572	20.5111	22.1004
	rs34099891	T	G	T	G	-0.0824109	0.0465473	0.26108	0.72534	FALSE	FALSE	FALSE	GVY4Ce	60842512	0.0786394	0.0264678	TRUE	reported	textfile	0.0174244	2.24925e-06	TRUE	reported	textfile	8200	TRUE	0.00272055	22.3639	22.1004
	rs4148714	C	A	C	A	-0.125867	0.0405572	0.0913027	0.934316	FALSE	FALSE	FALSE	GVY4Ce	117598399	0.396476	0.0478308	TRUE	reported	textfile	0.027082	3.35762e-06	TRUE	reported	textfile	8200	TRUE	0.00262728	21.5952	22.1004
	rs553719	C	T	C	T	0.147306	0.0522713	0.937921	0.103574	FALSE	FALSE	FALSE	GVY4Ce	36867336	0.180299	0.0390132	TRUE	reported	textfile	0.0328968	7.54079e-06	TRUE	reported	textfile	8200	TRUE	0.00243927	20.046	22.1004
	rs5997787	C	T	C	T	0.0735554	0.0176279	0.55684	0.306044	FALSE	FALSE	FALSE	GVY4Ce	30858967	0.490271	0.0255522	TRUE	reported	textfile	0.0159581	4.04072e-06	TRUE	reported	textfile	8200	TRUE	0.00258422	21.2403	22.1004
	rs62027288	C	T	C	T	0.0759955	-0.0664171	0.460441	0.652894	FALSE	FALSE	FALSE	GVY4Ce	75142406	0.00697204	0.0246156	TRUE	reported	textfile	0.0156247	1.15144e-06	TRUE	reported	textfile	8200	TRUE	0.00287665	23.6508	22.1004
	rs73202647	C	T	C	T	-0.109072	-0.0567499	0.121515	0.891797	FALSE	FALSE	FALSE	GVY4Ce	12746929	0.132275	0.0377029	TRUE	reported	textfile	0.0238233	4.68646e-06	TRUE	reported	textfile	8200	TRUE	0.00254976	20.9564	22.1004
	rs73328382	A	C	A	C	-0.490215	-0.0996371	0.00586941	0.933321	FALSE	FALSE	FALSE	GVY4Ce	99422751	0.0362126	0.0475701	TRUE	reported	textfile	0.101636	1.41227e-06	TRUE	reported	textfile	8200	TRUE	0.00282901	23.258	22.1004
	rs74489311	A	T	A	T	-1.12714	-0.0811945	0.00103899	0.0173806	FALSE	TRUE	FALSE	GVY4Ce	163789181	0.375023	0.0915277	TRUE	reported	textfile	0.240369	2.74252e-06	TRUE	reported	textfile	8200	TRUE	0.00267437	21.9833	22.1004
	rs76051019	A	G	A	G	-0.23203	-0.120564	0.0258336	0.992675	FALSE	FALSE	FALSE	GVY4Ce	33150052	0.363312	0.132624	TRUE	reported	textfile	0.0487058	1.89885e-06	TRUE	reported	textfile	8200	TRUE	0.00276002	22.6893	22.1004
	rs77082173	T	C	T	C	0.201076	-0.0875679	0.030454	0.96973	FALSE	FALSE	FALSE	GVY4Ce	6132622	0.208464	0.0696199	TRUE	reported	textfile	0.0453441	9.23095e-06	TRUE	reported	textfile	8200	TRUE	0.00239235	19.6595	22.1004
GCST90199646	rs10097464	C	T	C	T	-0.0715199	-0.011765	0.441401	0.459902	FALSE	FALSE	FALSE	GVY4Ce	135773275	0.619985	0.023726	TRUE	reported	textfile	0.015626	4.71698e-06	TRUE	reported	textfile	8013	TRUE	0.00260753	20.9435	21.9187
	rs1010664	C	T	C	T	0.200004	-0.0510851	0.0324447	0.969078	FALSE	FALSE	FALSE	GVY4Ce	14923688	0.451802	0.0678949	TRUE	reported	textfile	0.0431905	3.64356e-06	TRUE	reported	textfile	8013	TRUE	0.00266898	21.4384	21.9187
	rs10153505	G	T	G	T	-0.109387	-0.0504589	0.854558	0.160176	FALSE	FALSE	FALSE	GVY4Ce	652948	0.117809	0.0322619	TRUE	reported	textfile	0.02296	1.89575e-06	TRUE	reported	textfile	8013	TRUE	0.00282465	22.6923	21.9187
	rs1041350	C	T	C	T	0.0994006	0.0483583	0.162725	0.882097	FALSE	FALSE	FALSE	GVY4Ce	23613595	0.185332	0.0365102	TRUE	reported	textfile	0.0208627	1.8932e-06	TRUE	reported	textfile	8013	TRUE	0.00282497	22.6949	21.9187
	rs113812650	T	C	T	C	-0.420894	-0.0415791	0.00708375	0.982852	FALSE	FALSE	FALSE	GVY4Ce	95395376	0.665764	0.0962546	TRUE	reported	textfile	0.0921	4.87808e-06	TRUE	reported	textfile	8013	TRUE	0.00259956	20.8794	21.9187
	rs117167763	T	C	T	C	0.594305	0.143192	0.00338685	0.987877	FALSE	FALSE	FALSE	GVY4Ce	75106967	0.204655	0.112892	TRUE	reported	textfile	0.13274	7.56251e-06	TRUE	reported	textfile	8013	TRUE	0.00249537	20.0404	21.9187
	rs12471344	A	G	A	G	-0.204526	0.0447781	0.0351109	0.95829	FALSE	FALSE	FALSE	GVY4Ce	154259805	0.443032	0.0583744	TRUE	reported	textfile	0.0425454	1.53017e-06	TRUE	reported	textfile	8013	TRUE	0.00287572	23.1038	21.9187
	rs147503040	A	G	A	G	0.240882	0.0685095	0.0254653	0.983458	FALSE	FALSE	FALSE	GVY4Ce	182797506	0.473448	0.0955662	TRUE	reported	textfile	0.0486921	7.53505e-07	TRUE	reported	textfile	8013	TRUE	0.00304489	24.4671	21.9187
	rs187258635	T	C	T	C	-0.236251	-0.0686312	0.0215081	0.981562	FALSE	FALSE	FALSE	GVY4Ce	207663120	0.43338	0.0876045	TRUE	reported	textfile	0.0532573	9.16358e-06	TRUE	reported	textfile	8013	TRUE	0.00244979	19.6735	21.9187
	rs2833465	T	C	T	C	-0.110209	-0.00292076	0.12614	0.832476	FALSE	FALSE	FALSE	GVY4Ce	31591790	0.926488	0.0316564	TRUE	reported	textfile	0.023061	1.76156e-06	TRUE	reported	textfile	8013	TRUE	0.00284215	22.8333	21.9187
	rs367715	G	A	G	A	0.0721685	0.0268919	0.348675	0.801832	FALSE	FALSE	FALSE	GVY4Ce	46487542	0.359997	0.0293781	TRUE	reported	textfile	0.0160673	7.0676e-06	TRUE	reported	textfile	8013	TRUE	0.00251144	20.1698	21.9187
	rs375709482	T	C	T	C	-0.273576	0.0864324	0.0191874	0.987631	FALSE	FALSE	FALSE	GVY4Ce	114434155	0.426434	0.108678	TRUE	reported	textfile	0.0557177	9.10581e-07	TRUE	reported	textfile	8013	TRUE	0.00299964	24.1025	21.9187
	rs3861695	T	C	T	C	-0.0760413	0.0218363	0.683305	0.16193	FALSE	FALSE	FALSE	GVY4Ce	83506486	0.493743	0.0319073	TRUE	reported	textfile	0.0169127	6.92059e-06	TRUE	reported	textfile	8013	TRUE	0.00251642	20.2099	21.9187
	rs522708	G	A	G	A	-0.0822705	0.0168968	0.283475	0.68568	FALSE	FALSE	FALSE	GVY4Ce	96017489	0.505645	0.0253846	TRUE	reported	textfile	0.0169917	1.28672e-06	TRUE	reported	textfile	8013	TRUE	0.0029171	23.4372	21.9187
	rs6010005	C	G	C	G	0.229928	-0.0272802	0.0237352	0.0297403	FALSE	TRUE	FALSE	GVY4Ce	50558690	0.686714	0.0676394	TRUE	reported	textfile	0.05	4.25419e-06	TRUE	reported	textfile	8013	TRUE	0.00263211	21.1415	21.9187
	rs62362979	G	A	G	A	0.273101	0.15186	0.0161857	0.991271	FALSE	FALSE	FALSE	GVY4Ce	84208390	0.210956	0.121397	TRUE	reported	textfile	0.0610391	7.66985e-06	TRUE	reported	textfile	8013	TRUE	0.00249202	20.0134	21.9187
	rs62621664	T	G	T	G	0.265359	-0.149142	0.0182409	0.988802	FALSE	FALSE	FALSE	GVY4Ce	24504968	0.174126	0.109739	TRUE	reported	textfile	0.0575444	4.00005e-06	TRUE	reported	textfile	8013	TRUE	0.00264676	21.2595	21.9187
	rs72645867	A	G	A	G	0.162441	0.000251032	0.0602902	0.967296	FALSE	FALSE	FALSE	GVY4Ce	95314726	0.997038	0.067627	TRUE	reported	textfile	0.0331451	9.53955e-07	TRUE	reported	textfile	8013	TRUE	0.00298853	24.0129	21.9187
	rs72824920	C	T	C	T	0.192917	0.0377014	0.0442895	0.96248	FALSE	FALSE	FALSE	GVY4Ce	50345769	0.540876	0.0616551	TRUE	reported	textfile	0.0371937	2.13916e-07	TRUE	reported	textfile	8013	TRUE	0.0033462	26.8964	21.9187
	rs72950259	G	T	G	T	0.409958	-0.0375501	0.00712767	0.987782	FALSE	FALSE	FALSE	GVY4Ce	215026687	0.737773	0.112156	TRUE	reported	textfile	0.0917044	7.80613e-06	TRUE	reported	textfile	8013	TRUE	0.00248783	19.9797	21.9187
	rs73217253	A	G	A	G	-0.160981	-0.0644997	0.0584083	0.949401	FALSE	FALSE	FALSE	GVY4Ce	133872734	0.230464	0.0537872	TRUE	reported	textfile	0.0328036	9.2284e-07	TRUE	reported	textfile	8013	TRUE	0.00299646	24.0767	21.9187
	rs75476920	C	T	C	T	-0.0942693	0.0030358	0.15625	0.920066	FALSE	FALSE	FALSE	GVY4Ce	42064447	0.943733	0.0430131	TRUE	reported	textfile	0.0212045	8.75949e-06	TRUE	reported	textfile	8013	TRUE	0.00246048	19.7595	21.9187
	rs76930336	A	C	A	C	-0.202699	0.0274238	0.0324797	0.959245	FALSE	FALSE	FALSE	GVY4Ce	118594049	0.644251	0.0593891	TRUE	reported	textfile	0.0432874	2.83225e-06	TRUE	reported	textfile	8013	TRUE	0.00272897	21.9216	21.9187
	rs77091748	T	C	T	C	0.25787	0.10584	0.0181761	0.992616	FALSE	FALSE	FALSE	GVY4Ce	79180565	0.449798	0.140046	TRUE	reported	textfile	0.0580381	8.86671e-06	TRUE	reported	textfile	8013	TRUE	0.0024576	19.7364	21.9187
	rs77380220	A	G	A	G	0.222387	0.018138	0.0258828	0.983396	FALSE	FALSE	FALSE	GVY4Ce	70959872	0.841725	0.0908323	TRUE	reported	textfile	0.0486142	4.77297e-06	TRUE	reported	textfile	8013	TRUE	0.00260474	20.9211	21.9187
	rs79188489	T	G	T	G	0.343904	-0.0461934	0.0106531	0.989649	FALSE	FALSE	FALSE	GVY4Ce	29074567	0.684484	0.113678	TRUE	reported	textfile	0.0751315	4.70886e-06	TRUE	reported	textfile	8013	TRUE	0.00260796	20.947	21.9187
	rs9572022	G	A	G	A	-0.0758655	0.0137762	0.568464	0.409587	FALSE	FALSE	FALSE	GVY4Ce	68811966	0.566424	0.0240286	TRUE	reported	textfile	0.0155994	1.154e-06	TRUE	reported	textfile	8013	TRUE	0.00294305	23.6464	21.9187
	rs9959080	A	G	A	G	-0.0926697	-0.0138238	0.807333	0.2329	FALSE	FALSE	FALSE	GVY4Ce	59433536	0.621165	0.0279722	TRUE	reported	textfile	0.0194371	1.86358e-06	TRUE	reported	textfile	8013	TRUE	0.0028287	22.725	21.9187
GCST90199647	rs10902695	T	C	T	C	-0.0834655	-0.0119359	0.274212	0.687097	FALSE	FALSE	FALSE	GVY4Ce	28319022	0.640585	0.0255653	TRUE	reported	textfile	0.018084	3.9229e-06	TRUE	reported	textfile	7822	TRUE	0.00271598	21.2968	21.4157
	rs114110478	C	G	C	G	0.142487	0.00455356	0.0759902	0.0544982	FALSE	TRUE	FALSE	GVY4Ce	60439249	0.929777	0.0516716	TRUE	reported	textfile	0.0303158	2.60048e-06	TRUE	reported	textfile	7822	TRUE	0.00281624	22.0852	21.4157
	rs115520044	A	G	A	G	0.322722	-0.0374773	0.016898	0.989953	FALSE	FALSE	FALSE	GVY4Ce	49488289	0.759142	0.122232	TRUE	reported	textfile	0.0619626	1.90536e-07	TRUE	reported	textfile	7822	TRUE	0.00345602	27.1198	21.4157
	rs116572946	T	C	T	C	-0.278367	0.0297258	0.0176742	0.982945	FALSE	FALSE	FALSE	GVY4Ce	60080909	0.744996	0.0913954	TRUE	reported	textfile	0.060805	4.694e-06	TRUE	reported	textfile	7822	TRUE	0.00267225	20.953	21.4157
	rs116926604	C	T	C	T	-0.276332	0.0190945	0.0187757	0.955845	FALSE	FALSE	FALSE	GVY4Ce	86916079	0.741013	0.0577723	TRUE	reported	textfile	0.0591917	3.03525e-06	TRUE	reported	textfile	7822	TRUE	0.00277853	21.7886	21.4157
	rs12259905	T	C	T	C	0.155223	-0.026886	0.0731332	0.888061	FALSE	FALSE	FALSE	GVY4Ce	28920494	0.473337	0.0374948	TRUE	reported	textfile	0.0305894	3.88709e-07	TRUE	reported	textfile	7822	TRUE	0.00328114	25.743	21.4157
	rs1388182	T	C	T	C	-0.155876	0.0456827	0.0561395	0.983882	FALSE	FALSE	FALSE	GVY4Ce	179285708	0.623265	0.0929969	TRUE	reported	textfile	0.0349153	8.02918e-06	TRUE	reported	textfile	7822	TRUE	0.00254158	19.9258	21.4157
	rs149370966	A	G	A	G	-0.270438	0.0108364	0.0180128	0.99384	FALSE	FALSE	FALSE	GVY4Ce	39722660	0.941549	0.147791	TRUE	reported	textfile	0.0600696	6.72911e-06	TRUE	reported	textfile	7822	TRUE	0.00258455	20.2635	21.4157
	rs17428030	G	A	G	A	0.136372	-0.0390139	0.0811424	0.896034	FALSE	FALSE	FALSE	GVY4Ce	84338706	0.31114	0.0385196	TRUE	reported	textfile	0.0301283	5.99992e-06	TRUE	reported	textfile	7822	TRUE	0.00261245	20.4828	21.4157
	rs180968112	A	G	A	G	-0.313019	0.11509	0.0133062	0.990268	FALSE	FALSE	FALSE	GVY4Ce	16587338	0.351317	0.123482	TRUE	reported	textfile	0.0708522	9.96551e-06	TRUE	reported	textfile	7822	TRUE	0.00248906	19.513	21.4157
	rs2245730	C	A	C	A	-0.0787472	0.0114326	0.435058	0.573923	FALSE	FALSE	FALSE	GVY4Ce	42705218	0.631641	0.0238467	TRUE	reported	textfile	0.0162537	1.26685e-06	TRUE	reported	textfile	7822	TRUE	0.0029919	23.4668	21.4157
	rs258831	G	C	G	C	-0.0982197	-0.0578566	0.172656	0.198527	FALSE	TRUE	FALSE	GVY4Ce	11415085	0.0530115	0.0299027	TRUE	reported	textfile	0.0220943	8.76968e-06	TRUE	reported	textfile	7822	TRUE	0.00252013	19.7572	21.4157
	rs34804482	C	T	C	T	-0.242551	0.0623751	0.0234865	0.997223	FALSE	FALSE	FALSE	GVY4Ce	27368192	0.777054	0.220282	TRUE	reported	textfile	0.0527985	4.35018e-06	TRUE	reported	textfile	7822	TRUE	0.00269076	21.0985	21.4157
	rs4615950	T	C	T	C	-0.0738501	0.0280003	0.399028	0.563984	FALSE	FALSE	FALSE	GVY4Ce	106010522	0.238283	0.0237433	TRUE	reported	textfile	0.0164924	7.54096e-06	TRUE	reported	textfile	7822	TRUE	0.00255685	20.0458	21.4157
	rs643104	C	T	C	T	-0.0815481	-0.0228519	0.336783	0.676343	FALSE	FALSE	FALSE	GVY4Ce	118696416	0.361858	0.0250616	TRUE	reported	textfile	0.017458	2.99589e-06	TRUE	reported	textfile	7822	TRUE	0.00278171	21.8136	21.4157
	rs67360043	A	T	A	T	0.0886627	-0.0320642	0.210393	0.309749	FALSE	TRUE	FALSE	GVY4Ce	38938213	0.21202	0.0256919	TRUE	reported	textfile	0.0196537	6.44475e-06	TRUE	reported	textfile	7822	TRUE	0.00259506	20.3461	21.4157
	rs72793907	G	A	G	A	-0.274555	-0.221	0.0174664	0.989968	FALSE	FALSE	FALSE	GVY4Ce	22537986	0.0518466	0.11366	TRUE	reported	textfile	0.0606691	6.02668e-06	TRUE	reported	textfile	7822	TRUE	0.00261138	20.4745	21.4157
	rs7323950	G	A	G	A	-0.0792948	-0.018888	0.669651	0.318203	FALSE	FALSE	FALSE	GVY4Ce	22199638	0.456578	0.0253702	TRUE	reported	textfile	0.0174912	5.80379e-06	TRUE	reported	textfile	7822	TRUE	0.00262055	20.5466	21.4157
	rs74069834	G	A	G	A	-0.270594	0.0742312	0.0173385	0.986156	FALSE	FALSE	FALSE	GVY4Ce	21946362	0.457135	0.0998303	TRUE	reported	textfile	0.0611119	9.51795e-06	TRUE	reported	textfile	7822	TRUE	0.00250023	19.6008	21.4157
	rs74526939	G	A	G	A	-0.20014	0.0591831	0.0338003	0.96979	FALSE	FALSE	FALSE	GVY4Ce	50073331	0.385689	0.0682256	TRUE	reported	textfile	0.0441667	5.85782e-06	TRUE	reported	textfile	7822	TRUE	0.00261831	20.529	21.4157
	rs75095637	C	A	C	A	0.140865	0.0820999	0.0721271	0.9227	FALSE	FALSE	FALSE	GVY4Ce	24913444	0.0688399	0.045123	TRUE	reported	textfile	0.0309814	5.44768e-06	TRUE	reported	textfile	7822	TRUE	0.00263597	20.6677	21.4157
	rs75723819	A	C	A	C	-0.211336	0.0537727	0.0308404	0.961989	FALSE	FALSE	FALSE	GVY4Ce	120099185	0.378612	0.0610736	TRUE	reported	textfile	0.0468234	6.37754e-06	TRUE	reported	textfile	7822	TRUE	0.00259761	20.3662	21.4157
	rs75870478	T	C	T	C	-0.281468	-0.0705911	0.0183091	0.983992	FALSE	FALSE	FALSE	GVY4Ce	35563982	0.4603	0.0956062	TRUE	reported	textfile	0.0600974	2.81969e-06	TRUE	reported	textfile	7822	TRUE	0.00279649	21.9298	21.4157
	rs79361921	A	G	A	G	-0.232926	-0.0845584	0.0295007	0.94219	FALSE	FALSE	FALSE	GVY4Ce	58022004	0.0931086	0.0503555	TRUE	reported	textfile	0.0470132	7.25218e-07	TRUE	reported	textfile	7822	TRUE	0.00312837	24.5406	21.4157
	rs79542551	G	A	G	A	-0.328871	0.326245	0.0127102	0.997502	FALSE	FALSE	FALSE	GVY4Ce	93072020	0.161687	0.233129	TRUE	reported	textfile	0.0716904	4.48836e-06	TRUE	reported	textfile	7822	TRUE	0.00268315	21.0387	21.4157
GCST90199648	rs10152997	C	T	C	T	-0.0762043	0.0191454	0.552011	0.422014	FALSE	FALSE	FALSE	GVY4Ce	60904958	0.422905	0.0238902	TRUE	reported	textfile	0.0152829	6.15686e-07	TRUE	reported	textfile	8139	TRUE	0.00304545	24.8565	27.0545
	rs111517692	A	G	A	G	0.186098	0.127642	0.0399656	0.985634	FALSE	FALSE	FALSE	GVY4Ce	130054393	0.197034	0.0989436	TRUE	reported	textfile	0.0389448	1.76596e-06	TRUE	reported	textfile	8139	TRUE	0.00279767	22.8285	27.0545
	rs11219784	C	T	C	T	-0.29621	0.0914696	0.0145213	0.991425	FALSE	FALSE	FALSE	GVY4Ce	124810777	0.468857	0.12628	TRUE	reported	textfile	0.0635149	3.10664e-06	TRUE	reported	textfile	8139	TRUE	0.00266513	21.7441	27.0545
	rs112766573	T	C	T	C	0.149694	-0.0364094	0.055333	0.933736	FALSE	FALSE	FALSE	GVY4Ce	75182536	0.449915	0.0481888	TRUE	reported	textfile	0.033745	9.16336e-06	TRUE	reported	textfile	8139	TRUE	0.00241196	19.6736	27.0545
	rs116139938	T	G	T	G	-0.267495	0.0427692	0.0309995	0.956016	FALSE	FALSE	FALSE	GVY4Ce	19002728	0.46213	0.0581622	TRUE	reported	textfile	0.0444913	1.82908e-09	TRUE	reported	textfile	8139	TRUE	0.00442166	36.1389	27.0545
	rs116855721	A	G	A	G	0.235097	-0.0720472	0.0228932	0.969887	FALSE	FALSE	FALSE	GVY4Ce	54584830	0.288279	0.0678472	TRUE	reported	textfile	0.0504828	3.20903e-06	TRUE	reported	textfile	8139	TRUE	0.00265754	21.6821	27.0545
	rs117813792	G	A	G	A	-0.331071	-0.205513	0.0136799	0.996127	FALSE	FALSE	FALSE	GVY4Ce	113729402	0.267166	0.185212	TRUE	reported	textfile	0.0662852	5.89455e-07	TRUE	reported	textfile	8139	TRUE	0.00305569	24.9403	27.0545
	rs118097969	A	C	A	C	0.254382	0.0069037	0.0178351	0.993756	FALSE	FALSE	FALSE	GVY4Ce	8431366	0.963143	0.149399	TRUE	reported	textfile	0.0574857	9.63851e-06	TRUE	reported	textfile	8139	TRUE	0.00240015	19.577	27.0545
	rs11976181	C	T	C	T	-0.132448	0.0330445	0.817748	0.180443	FALSE	FALSE	FALSE	GVY4Ce	142097764	0.282175	0.0307263	TRUE	reported	textfile	0.0208369	2.06534e-10	TRUE	reported	textfile	8139	TRUE	0.00493973	40.3941	27.0545
	rs138306161	T	C	T	C	-0.308695	-0.000277348	0.0122087	0.99528	FALSE	FALSE	FALSE	GVY4Ce	86712771	0.998633	0.161891	TRUE	reported	textfile	0.069429	8.74061e-06	TRUE	reported	textfile	8139	TRUE	0.002423	19.7638	27.0545
	rs138882034	C	T	C	T	-0.40062	-0.000275118	0.00797971	0.957895	FALSE	FALSE	FALSE	GVY4Ce	14215441	0.996419	0.0612995	TRUE	reported	textfile	0.0847491	2.27723e-06	TRUE	reported	textfile	8139	TRUE	0.002738	22.3403	27.0545
	rs139280007	C	G	C	G	-0.241187	0.118404	0.0208697	0.0350436	FALSE	TRUE	FALSE	GVY4Ce	34621100	0.0624482	0.0635521	TRUE	reported	textfile	0.0534709	6.46361e-06	TRUE	reported	textfile	8139	TRUE	0.00249355	20.3407	27.0545
	rs147071339	G	A	G	A	-0.72443	-0.0906065	0.0024003	0.974391	FALSE	FALSE	FALSE	GVY4Ce	120559843	0.247743	0.0783897	TRUE	reported	textfile	0.15567	3.26144e-06	TRUE	reported	textfile	8139	TRUE	0.00265374	21.6509	27.0545
	rs16923778	T	C	T	C	-0.364422	-0.0569781	0.0114964	0.959334	FALSE	FALSE	FALSE	GVY4Ce	7241558	0.347257	0.06062	TRUE	reported	textfile	0.0717318	3.76743e-07	TRUE	reported	textfile	8139	TRUE	0.00316111	25.8035	27.0545
	rs16936434	A	G	A	G	-0.144243	0.053824	0.0583838	0.959577	FALSE	FALSE	FALSE	GVY4Ce	42229140	0.369219	0.0599419	TRUE	reported	textfile	0.0325739	9.50335e-06	TRUE	reported	textfile	8139	TRUE	0.00240344	19.6039	27.0545
	rs185053832	A	C	A	C	-0.376359	0.105445	0.00916021	0.981768	FALSE	FALSE	FALSE	GVY4Ce	142063511	0.235106	0.0888105	TRUE	reported	textfile	0.0796429	2.29459e-06	TRUE	reported	textfile	8139	TRUE	0.00273621	22.3256	27.0545
	rs219151	C	G	C	G	-0.0930985	0.0473391	0.803761	0.813049	FALSE	TRUE	FALSE	GVY4Ce	32990620	0.118263	0.0303047	TRUE	reported	textfile	0.0192478	1.31914e-06	TRUE	reported	textfile	8139	TRUE	0.00286619	23.3893	27.0545
	rs2638281	G	A	G	A	0.0758197	-0.043962	0.588573	0.532353	FALSE	FALSE	FALSE	GVY4Ce	48707612	0.0621527	0.0235695	TRUE	reported	textfile	0.015228	6.39246e-07	TRUE	reported	textfile	8139	TRUE	0.00303659	24.784	27.0545
	rs2800798	A	G	A	G	0.079919	0.00609311	0.245431	0.807128	FALSE	FALSE	FALSE	GVY4Ce	164697016	0.837143	0.0296431	TRUE	reported	textfile	0.0176597	6.02526e-06	TRUE	reported	textfile	8139	TRUE	0.00250998	20.4751	27.0545
	rs28429046	T	A	T	A	0.0877134	0.0106016	0.218221	0.220787	FALSE	TRUE	FALSE	GVY4Ce	242003929	0.713153	0.0288381	TRUE	reported	textfile	0.0190478	4.12664e-06	TRUE	reported	textfile	8139	TRUE	0.00259861	21.2	27.0545
	rs34278530	C	T	C	T	0.0966945	0.0383652	0.16675	0.788011	FALSE	FALSE	FALSE	GVY4Ce	84656112	0.18797	0.0291395	TRUE	reported	textfile	0.020462	2.29468e-06	TRUE	reported	textfile	8139	TRUE	0.00273619	22.3255	27.0545
	rs4988235	A	G	A	G	0.125118	-0.00931576	0.646606	0.40042	FALSE	FALSE	FALSE	GVY4Ce	135851076	0.703302	0.0244594	TRUE	reported	textfile	0.015516	7.39543e-16	TRUE	reported	textfile	8139	TRUE	0.00792598	65.009	27.0545
	rs5026374	A	T	A	T	0.0705329	0.0124776	0.580627	0.619282	FALSE	TRUE	FALSE	GVY4Ce	164806103	0.606939	0.0242544	TRUE	reported	textfile	0.0155202	5.50414e-06	TRUE	reported	textfile	8139	TRUE	0.00253115	20.6482	27.0545
	rs526600	A	T	A	T	-0.303655	0.0314715	0.980668	0.988625	FALSE	TRUE	FALSE	GVY4Ce	86900914	0.778741	0.112014	TRUE	reported	textfile	0.0557783	5.21094e-08	TRUE	reported	textfile	8139	TRUE	0.00362811	29.6295	27.0545
	rs55646821	A	C	A	C	0.150169	0.0839049	0.936148	0.077102	FALSE	FALSE	FALSE	GVY4Ce	20747591	0.0616538	0.0448983	TRUE	reported	textfile	0.0310105	1.28209e-06	TRUE	reported	textfile	8139	TRUE	0.00287291	23.4442	27.0545
	rs6444144	T	C	T	C	0.0750138	0.0282713	0.601673	0.361298	FALSE	FALSE	FALSE	GVY4Ce	165091228	0.246898	0.0244157	TRUE	reported	textfile	0.0155373	1.37932e-06	TRUE	reported	textfile	8139	TRUE	0.00285574	23.3037	27.0545
	rs72670617	G	T	G	T	-0.109981	-0.00697195	0.120487	0.776063	FALSE	FALSE	FALSE	GVY4Ce	113913130	0.807927	0.0286792	TRUE	reported	textfile	0.0239503	4.38952e-06	TRUE	reported	textfile	8139	TRUE	0.00258416	21.0818	27.0545
	rs7536190	A	T	A	T	0.113912	0.0358602	0.886879	0.885143	FALSE	TRUE	FALSE	GVY4Ce	150426629	0.331366	0.0369173	TRUE	reported	textfile	0.0241326	2.35583e-06	TRUE	reported	textfile	8139	TRUE	0.00273006	22.2753	27.0545
	rs77283946	A	C	A	C	-0.552741	-0.0517629	0.0189905	0.968757	FALSE	FALSE	FALSE	GVY4Ce	18982968	0.453853	0.0691087	TRUE	reported	textfile	0.0562598	8.80516e-23	TRUE	reported	textfile	8139	TRUE	0.0117208	96.5029	27.0545
	rs78394231	C	T	C	T	0.116636	-0.00982755	0.0970646	0.891699	FALSE	FALSE	FALSE	GVY4Ce	107327919	0.794945	0.0378136	TRUE	reported	textfile	0.0258071	6.19749e-06	TRUE	reported	textfile	8139	TRUE	0.00250338	20.4211	27.0545
	rs868427	C	T	C	T	-0.103914	0.00668393	0.130862	0.852355	FALSE	FALSE	FALSE	GVY4Ce	51531385	0.842336	0.0336033	TRUE	reported	textfile	0.0229285	5.83995e-06	TRUE	reported	textfile	8139	TRUE	0.00251728	20.5348	27.0545
GCST90199649	rs10188669	A	G	A	G	-0.0671657	0.00211652	0.51141	0.454948	FALSE	FALSE	FALSE	GVY4Ce	150897389	0.928839	0.0236996	TRUE	reported	textfile	0.0151226	8.93665e-06	TRUE	reported	textfile	8134	TRUE	0.00241928	19.7213	42.2626
	rs11121795	T	C	T	C	-0.178874	0.106632	0.0377603	0.982499	FALSE	FALSE	FALSE	GVY4Ce	6399939	0.248141	0.0923319	TRUE	reported	textfile	0.0395199	6.00641e-06	TRUE	reported	textfile	8134	TRUE	0.00251227	20.4812	42.2626
	rs112843621	G	A	G	A	-0.366363	0.0133667	0.0095679	0.985793	FALSE	FALSE	FALSE	GVY4Ce	26049841	0.895106	0.101381	TRUE	reported	textfile	0.0780364	2.66903e-06	TRUE	reported	textfile	8134	TRUE	0.0027024	22.0355	42.2626
	rs115307528	G	A	G	A	-0.299834	0.145829	0.0131579	0.991319	FALSE	FALSE	FALSE	GVY4Ce	166268501	0.266252	0.131172	TRUE	reported	textfile	0.0666202	6.77474e-06	TRUE	reported	textfile	8134	TRUE	0.00248408	20.2508	42.2626
	rs140033739	A	G	A	G	-0.166275	-0.00326969	0.0496511	0.886978	FALSE	FALSE	FALSE	GVY4Ce	30237375	0.930637	0.0375641	TRUE	reported	textfile	0.0351807	2.28641e-06	TRUE	reported	textfile	8134	TRUE	0.00273873	22.3325	42.2626
	rs141701630	T	C	T	C	0.317893	-0.0715456	0.012135	0.995053	FALSE	FALSE	FALSE	GVY4Ce	100573450	0.685828	0.176864	TRUE	reported	textfile	0.0698624	5.3575e-06	TRUE	reported	textfile	8134	TRUE	0.00253902	20.6999	42.2626
	rs1532085	G	A	G	A	-0.0917612	-0.0384251	0.623614	0.422024	FALSE	FALSE	FALSE	GVY4Ce	58391167	0.107674	0.0238852	TRUE	reported	textfile	0.0157522	5.70113e-09	TRUE	reported	textfile	8134	TRUE	0.00415455	33.9257	42.2626
	rs157595	G	A	G	A	0.0939248	-0.060511	0.599898	0.308312	FALSE	FALSE	FALSE	GVY4Ce	44922203	0.0181005	0.0256017	TRUE	reported	textfile	0.0158609	3.18487e-09	TRUE	reported	textfile	8134	TRUE	0.00429272	35.0589	42.2626
	rs174560	C	T	C	T	-0.263536	0.0251718	0.306967	0.611445	FALSE	FALSE	FALSE	GVY4Ce	61814292	0.295584	0.0240659	TRUE	reported	textfile	0.0162451	3.49778e-59	TRUE	reported	textfile	8134	TRUE	0.0313402	263.105	42.2626
	rs2269938	G	C	G	C	-0.104296	-0.00901892	0.166874	0.204464	FALSE	TRUE	FALSE	GVY4Ce	119804210	0.757084	0.029158	TRUE	reported	textfile	0.0203216	2.86272e-07	TRUE	reported	textfile	8134	TRUE	0.00322783	26.3338	42.2626
	rs2712421	T	G	T	G	0.0732419	-0.0128082	0.655887	0.30399	FALSE	FALSE	FALSE	GVY4Ce	128568900	0.619301	0.0257793	TRUE	reported	textfile	0.0160311	4.90664e-06	TRUE	reported	textfile	8134	TRUE	0.00255962	20.8682	42.2626
	rs34542491	T	C	T	C	0.0896599	0.0100644	0.175664	0.840376	FALSE	FALSE	FALSE	GVY4Ce	168805806	0.754684	0.0322092	TRUE	reported	textfile	0.0199692	7.12545e-06	TRUE	reported	textfile	8134	TRUE	0.00247227	20.1543	42.2626
	rs3812316	G	C	G	C	-0.136926	0.0431354	0.121888	0.127904	FALSE	TRUE	FALSE	GVY4Ce	73606007	0.220067	0.0351738	TRUE	reported	textfile	0.023095	3.05078e-09	TRUE	reported	textfile	8134	TRUE	0.00430288	35.1422	42.2626
	rs400810	G	A	G	A	0.128883	0.0537018	0.0862856	0.920124	FALSE	FALSE	FALSE	GVY4Ce	31675054	0.215784	0.0433843	TRUE	reported	textfile	0.0270407	1.8767e-06	TRUE	reported	textfile	8134	TRUE	0.00278509	22.7116	42.2626
	rs60417901	T	C	T	C	-0.226606	-0.00796547	0.0227329	0.926797	FALSE	FALSE	FALSE	GVY4Ce	92597062	0.86065	0.0453752	TRUE	reported	textfile	0.051098	9.21865e-06	TRUE	reported	textfile	8134	TRUE	0.00241203	19.662	42.2626
	rs626283	G	C	G	C	0.174476	-0.00956455	0.562667	0.604068	FALSE	TRUE	TRUE	GVY4Ce	54173307	0.692116	0.0241538	TRUE	reported	textfile	0.0155831	4.2426e-29	TRUE	reported	textfile	8134	FALSE	0.0151781	125.331	42.2626
	rs66466742	T	C	T	C	-0.189746	-0.00208	0.0402441	0.936796	FALSE	FALSE	FALSE	GVY4Ce	11225768	0.965959	0.0487383	TRUE	reported	textfile	0.0383851	7.68393e-07	TRUE	reported	textfile	8134	TRUE	0.00299511	24.4294	42.2626
	rs7241918	T	G	T	G	0.132894	-0.018941	0.826708	0.171493	FALSE	FALSE	FALSE	GVY4Ce	49634583	0.542118	0.0310704	TRUE	reported	textfile	0.0200029	3.05834e-11	TRUE	reported	textfile	8134	TRUE	0.00539722	44.1284	42.2626
	rs72697217	C	G	C	G	0.139809	-0.0581411	0.0714189	0.10073	FALSE	TRUE	FALSE	GVY4Ce	7763957	0.144159	0.0398096	TRUE	reported	textfile	0.031174	7.29826e-06	TRUE	reported	textfile	8134	TRUE	0.00246666	20.1084	42.2626
	rs74988287	C	T	C	T	-0.366432	-0.0836939	0.0099395	0.995379	FALSE	FALSE	FALSE	GVY4Ce	36690717	0.623899	0.170688	TRUE	reported	textfile	0.0770971	2.00554e-06	TRUE	reported	textfile	8134	TRUE	0.0027695	22.5842	42.2626
	rs77960347	G	A	G	A	0.479876	0.173694	0.0143349	0.992586	FALSE	FALSE	FALSE	GVY4Ce	49583585	0.202473	0.13628	TRUE	reported	textfile	0.0634052	3.77862e-14	TRUE	reported	textfile	8134	TRUE	0.00699289	57.2666	42.2626
	rs79608464	A	G	A	G	0.25749	-0.136749	0.01871	0.975065	FALSE	FALSE	FALSE	GVY4Ce	71298685	0.0645327	0.0739793	TRUE	reported	textfile	0.0562381	4.68177e-06	TRUE	reported	textfile	8134	TRUE	0.00257062	20.9581	42.2626
	rs80195574	A	G	A	G	-0.221346	0.00469534	0.0272033	0.99048	FALSE	FALSE	FALSE	GVY4Ce	34113605	0.968607	0.119306	TRUE	reported	textfile	0.0471492	2.67135e-06	TRUE	reported	textfile	8134	TRUE	0.00270219	22.0337	42.2626
	rs964184	C	G	C	G	-0.194744	-0.132108	0.868833	0.855516	FALSE	TRUE	FALSE	GVY4Ce	116778201	4.59547e-05	0.0324169	TRUE	reported	textfile	0.0224871	4.70771e-18	TRUE	reported	textfile	8134	TRUE	0.00913631	74.9816	42.2626
GCST90199650	rs113392484	C	T	C	T	0.318007	0.00223479	0.0109306	0.981921	FALSE	FALSE	FALSE	GVY4Ce	78437780	0.979645	0.0875921	TRUE	reported	textfile	0.0686372	3.60129e-06	TRUE	reported	textfile	8233	TRUE	0.00260055	21.4609	27.0723
	rs11598287	A	G	A	G	0.0749453	0.0285747	0.30454	0.705363	FALSE	FALSE	FALSE	GVY4Ce	132100905	0.271344	0.0259777	TRUE	reported	textfile	0.0160157	2.87603e-06	TRUE	reported	textfile	8233	TRUE	0.00265268	21.8923	27.0723
	rs11647808	A	C	A	C	0.212473	0.0392006	0.0790114	0.94226	FALSE	FALSE	FALSE	GVY4Ce	58736977	0.439974	0.0507623	TRUE	reported	textfile	0.0262875	6.33765e-16	TRUE	reported	textfile	8233	TRUE	0.0078726	65.3136	27.0723
	rs117078442	A	G	A	G	-0.209946	0.0337266	0.024059	0.980471	FALSE	FALSE	FALSE	GVY4Ce	22296682	0.686396	0.0835332	TRUE	reported	textfile	0.046984	7.87867e-06	TRUE	reported	textfile	8233	TRUE	0.00241939	19.9623	27.0723
	rs11950935	C	T	C	T	-0.0798371	-0.0188198	0.194657	0.848167	FALSE	FALSE	FALSE	GVY4Ce	27771436	0.565524	0.0327496	TRUE	reported	textfile	0.0178954	8.14575e-06	TRUE	reported	textfile	8233	TRUE	0.00241168	19.8985	27.0723
	rs1255731	C	T	C	T	-0.0753124	0.00728907	0.236978	0.721838	FALSE	FALSE	FALSE	GVY4Ce	63549593	0.78177	0.026313	TRUE	reported	textfile	0.0168771	8.10475e-06	TRUE	reported	textfile	8233	TRUE	0.00241285	19.9082	27.0723
	rs1354368	G	A	G	A	-0.072441	-0.0103477	0.64522	0.248119	FALSE	FALSE	FALSE	GVY4Ce	99520729	0.704599	0.027294	TRUE	reported	textfile	0.0148179	1.01477e-06	TRUE	reported	textfile	8233	TRUE	0.00289453	23.8941	27.0723
	rs139117506	C	A	C	A	-0.175748	-0.087885	0.0370029	0.966929	FALSE	FALSE	FALSE	GVY4Ce	83308234	0.182401	0.0659106	TRUE	reported	textfile	0.0379139	3.56131e-06	TRUE	reported	textfile	8233	TRUE	0.00260312	21.4822	27.0723
	rs142009207	C	G	C	G	-0.118055	-0.0405757	0.0765238	0.0919496	FALSE	TRUE	FALSE	GVY4Ce	42394393	0.320849	0.0408735	TRUE	reported	textfile	0.0266692	9.57138e-06	TRUE	reported	textfile	8233	TRUE	0.00237442	19.5904	27.0723
	rs142582686	T	G	T	G	0.164806	0.0244958	0.0429166	0.961553	FALSE	FALSE	FALSE	GVY4Ce	101005147	0.692188	0.0618756	TRUE	reported	textfile	0.0355849	3.63318e-06	TRUE	reported	textfile	8233	TRUE	0.00259852	21.4442	27.0723
	rs145909629	A	G	A	G	0.321487	0.0722587	0.0147347	0.979417	FALSE	FALSE	FALSE	GVY4Ce	26547368	0.375083	0.0814648	TRUE	reported	textfile	0.0589415	4.91562e-08	TRUE	reported	textfile	8233	TRUE	0.00360048	29.7426	27.0723
	rs148403098	T	C	T	C	0.167538	0.00456642	0.0411829	0.938541	FALSE	FALSE	FALSE	GVY4Ce	102351945	0.926654	0.0496049	TRUE	reported	textfile	0.0359224	3.10312e-06	TRUE	reported	textfile	8233	TRUE	0.00263507	21.7466	27.0723
	rs150393758	T	C	T	C	0.172921	0.0198628	0.0355126	0.981149	FALSE	FALSE	FALSE	GVY4Ce	69863978	0.819336	0.0869653	TRUE	reported	textfile	0.0390292	9.39877e-06	TRUE	reported	textfile	8233	TRUE	0.00237861	19.625	27.0723
	rs185272650	T	C	T	C	-0.300455	-0.0137948	0.0112236	0.99007	FALSE	FALSE	FALSE	GVY4Ce	183994764	0.906736	0.117747	TRUE	reported	textfile	0.067736	9.1782e-06	TRUE	reported	textfile	8233	TRUE	0.0023841	19.6704	27.0723
	rs1867457	C	T	C	T	-0.102015	0.0121492	0.111679	0.900408	FALSE	FALSE	FALSE	GVY4Ce	180177217	0.759791	0.039735	TRUE	reported	textfile	0.0229082	8.45953e-06	TRUE	reported	textfile	8233	TRUE	0.00240294	19.8263	27.0723
	rs190002061	A	G	A	G	-0.265524	-0.083392	0.0150532	0.996355	FALSE	FALSE	FALSE	GVY4Ce	49252618	0.665819	0.193084	TRUE	reported	textfile	0.058646	5.9667e-06	TRUE	reported	textfile	8233	TRUE	0.00248366	20.4939	27.0723
	rs19009	C	T	C	T	-0.0637423	-0.0420604	0.428307	0.514958	FALSE	FALSE	FALSE	GVY4Ce	6755951	0.0738023	0.0235259	TRUE	reported	textfile	0.0143515	8.9327e-06	TRUE	reported	textfile	8233	TRUE	0.00239036	19.7222	27.0723
	rs2472509	G	T	G	T	0.07003	0.0104108	0.326865	0.586286	FALSE	FALSE	FALSE	GVY4Ce	104921949	0.664261	0.0239861	TRUE	reported	textfile	0.0152695	4.51219e-06	TRUE	reported	textfile	8233	TRUE	0.00254831	21.0287	27.0723
	rs2794660	T	C	T	C	0.0949183	-0.0243718	0.140026	0.882255	FALSE	FALSE	FALSE	GVY4Ce	46749020	0.50447	0.0365135	TRUE	reported	textfile	0.0213333	8.61484e-06	TRUE	reported	textfile	8233	TRUE	0.00239874	19.7915	27.0723
	rs2997922	T	C	T	C	0.185074	-0.0465839	0.709362	0.226686	FALSE	FALSE	FALSE	GVY4Ce	128818465	0.0970622	0.028075	TRUE	reported	textfile	0.0156931	4.22481e-32	TRUE	reported	textfile	8233	TRUE	0.0166127	139.049	27.0723
	rs34380016	G	A	G	A	-0.0666468	-0.0497345	0.437266	0.520185	FALSE	FALSE	FALSE	GVY4Ce	29231718	0.0348057	0.023564	TRUE	reported	textfile	0.0146285	5.21484e-06	TRUE	reported	textfile	8233	TRUE	0.00251482	20.7517	27.0723
	rs35021400	A	C	A	C	-0.0820587	0.0421353	0.214409	0.879104	FALSE	FALSE	FALSE	GVY4Ce	87013026	0.240147	0.0358714	TRUE	reported	textfile	0.0174559	2.58998e-06	TRUE	reported	textfile	8233	TRUE	0.00267696	22.0932	27.0723
	rs61674325	T	C	T	C	-0.0679091	0.026135	0.329491	0.692781	FALSE	FALSE	FALSE	GVY4Ce	43587540	0.305874	0.0255246	TRUE	reported	textfile	0.0151389	7.26587e-06	TRUE	reported	textfile	8233	TRUE	0.00243809	20.1169	27.0723
	rs62154332	T	C	T	C	0.118683	0.0143467	0.0765673	0.930294	FALSE	FALSE	FALSE	GVY4Ce	101471008	0.755677	0.0461068	TRUE	reported	textfile	0.0265768	7.98229e-06	TRUE	reported	textfile	8233	TRUE	0.00241637	19.9373	27.0723
	rs73782967	A	G	A	G	-0.152997	0.0519001	0.0546588	0.985957	FALSE	FALSE	FALSE	GVY4Ce	116927323	0.60482	0.100294	TRUE	reported	textfile	0.0316953	1.38514e-06	TRUE	reported	textfile	8233	TRUE	0.00282222	23.2954	27.0723
	rs75333405	C	T	C	T	-0.170317	0.0465296	0.0356968	0.930744	FALSE	FALSE	FALSE	GVY4Ce	89836373	0.319601	0.0467503	TRUE	reported	textfile	0.0384177	9.28037e-06	TRUE	reported	textfile	8233	TRUE	0.00238155	19.6493	27.0723
	rs7617388	G	A	G	A	-0.0945532	-0.0217494	0.857589	0.081076	FALSE	FALSE	FALSE	GVY4Ce	18845898	0.614176	0.0431433	TRUE	reported	textfile	0.0213736	9.69652e-06	TRUE	reported	textfile	8233	TRUE	0.00237142	19.5655	27.0723
GCST90199651	rs1018091	C	T	C	T	0.0675472	0.00681588	0.457063	0.588989	FALSE	FALSE	FALSE	GVY4Ce	143618621	0.775524	0.0239021	TRUE	reported	textfile	0.0146699	4.13525e-06	TRUE	reported	textfile	8279	TRUE	0.0025543	21.1961	22.0219
	rs11709701	T	C	T	C	0.0724482	0.00221407	0.315498	0.687791	FALSE	FALSE	FALSE	GVY4Ce	197411278	0.930746	0.0254767	TRUE	reported	textfile	0.0158802	5.06262e-06	TRUE	reported	textfile	8279	TRUE	0.0025077	20.8084	22.0219
	rs11715464	G	A	G	A	-0.068416	-0.0274801	0.380725	0.567737	FALSE	FALSE	FALSE	GVY4Ce	42868195	0.247312	0.0237532	TRUE	reported	textfile	0.0152901	7.65771e-06	TRUE	reported	textfile	8279	TRUE	0.0024125	20.0166	22.0219
	rs117676889	C	T	C	T	0.194787	-0.0391295	0.0302902	0.978861	FALSE	FALSE	FALSE	GVY4Ce	3308072	0.64005	0.0836765	TRUE	reported	textfile	0.0430833	6.15001e-06	TRUE	reported	textfile	8279	TRUE	0.00246294	20.4361	22.0219
	rs11930628	G	A	G	A	0.123625	0.0166278	0.0880354	0.908189	FALSE	FALSE	FALSE	GVY4Ce	59788149	0.687789	0.0413774	TRUE	reported	textfile	0.0261218	2.21625e-06	TRUE	reported	textfile	8279	TRUE	0.00269808	22.3924	22.0219
	rs12129379	T	G	T	G	0.0929219	-0.0233666	0.17895	0.793256	FALSE	FALSE	FALSE	GVY4Ce	159995471	0.426455	0.0293819	TRUE	reported	textfile	0.0196733	2.32117e-06	TRUE	reported	textfile	8279	TRUE	0.00268742	22.3037	22.0219
	rs13268878	G	A	G	A	-0.0830568	-0.0122555	0.207876	0.834875	FALSE	FALSE	FALSE	GVY4Ce	74456081	0.701032	0.0319215	TRUE	reported	textfile	0.0187327	9.25958e-06	TRUE	reported	textfile	8279	TRUE	0.00236887	19.6537	22.0219
	rs143268031	G	A	G	A	0.479847	0.0423069	0.00507707	0.957046	FALSE	FALSE	FALSE	GVY4Ce	117697385	0.494799	0.0619703	TRUE	reported	textfile	0.104216	4.13762e-06	TRUE	reported	textfile	8279	TRUE	0.00255416	21.1949	22.0219
	rs144230997	T	A	T	A	-0.321529	-0.00899859	0.0116734	0.0175562	FALSE	TRUE	FALSE	GVY4Ce	70662972	0.921085	0.0908338	TRUE	reported	textfile	0.0691608	3.33553e-06	TRUE	reported	textfile	8279	TRUE	0.00260381	21.608	22.0219
	rs145325641	A	G	A	G	-0.229959	-0.0270423	0.0247183	0.994444	FALSE	FALSE	FALSE	GVY4Ce	95241095	0.867755	0.162406	TRUE	reported	textfile	0.047234	1.12451e-06	TRUE	reported	textfile	8279	TRUE	0.00285478	23.6966	22.0219
	rs148894582	G	A	G	A	-0.292453	-0.137729	0.0129169	0.992409	FALSE	FALSE	FALSE	GVY4Ce	58620420	0.311939	0.136209	TRUE	reported	textfile	0.0652677	7.43554e-06	TRUE	reported	textfile	8279	TRUE	0.00241928	20.0729	22.0219
	rs174603	A	G	A	G	-0.0936123	-0.000785304	0.318542	0.689228	FALSE	FALSE	FALSE	GVY4Ce	61858734	0.975397	0.0254642	TRUE	reported	textfile	0.015879	3.73866e-09	TRUE	reported	textfile	8279	TRUE	0.00418044	34.7468	22.0219
	rs181031465	T	C	T	C	0.282577	-0.0226143	0.0138364	0.9805	FALSE	FALSE	FALSE	GVY4Ce	164800745	0.795468	0.087241	TRUE	reported	textfile	0.0630184	7.32432e-06	TRUE	reported	textfile	8279	TRUE	0.00242274	20.1018	22.0219
	rs1934826	A	G	A	G	-0.065497	-0.00260751	0.454628	0.556348	FALSE	FALSE	FALSE	GVY4Ce	75950409	0.912434	0.0237114	TRUE	reported	textfile	0.0148097	9.75301e-06	TRUE	reported	textfile	8279	TRUE	0.00235693	19.5544	22.0219
	rs34736275	A	G	A	G	0.0734802	0.0122703	0.327588	0.713761	FALSE	FALSE	FALSE	GVY4Ce	80571027	0.638782	0.0261403	TRUE	reported	textfile	0.0160133	4.46044e-06	TRUE	reported	textfile	8279	TRUE	0.00253687	21.0511	22.0219
	rs3731644	C	T	C	T	0.110271	0.0328632	0.100677	0.919872	FALSE	FALSE	FALSE	GVY4Ce	235041233	0.448251	0.0433361	TRUE	reported	textfile	0.0242799	5.58135e-06	TRUE	reported	textfile	8279	TRUE	0.00248525	20.6217	22.0219
	rs6564915	G	T	G	T	0.101809	0.0514253	0.856833	0.137099	FALSE	FALSE	FALSE	GVY4Ce	81774628	0.138	0.03467	TRUE	reported	textfile	0.0218657	3.2225e-06	TRUE	reported	textfile	8279	TRUE	0.00261175	21.6741	22.0219
	rs73045049	A	G	A	G	-0.182777	-0.00124733	0.0352002	0.964004	FALSE	FALSE	FALSE	GVY4Ce	2658714	0.984071	0.0624748	TRUE	reported	textfile	0.040097	5.15535e-06	TRUE	reported	textfile	8279	TRUE	0.00250353	20.7737	22.0219
	rs73500833	T	C	T	C	-0.271564	-0.025204	0.0153501	0.988054	FALSE	FALSE	FALSE	GVY4Ce	26756076	0.813102	0.106604	TRUE	reported	textfile	0.0598372	5.66876e-06	TRUE	reported	textfile	8279	TRUE	0.00248167	20.5919	22.0219
	rs77207094	C	T	C	T	-0.248645	0.0578138	0.0186215	0.968676	FALSE	FALSE	FALSE	GVY4Ce	11520799	0.407022	0.069727	TRUE	reported	textfile	0.0546737	5.42114e-06	TRUE	reported	textfile	8279	TRUE	0.00249196	20.6775	22.0219
	rs8523	A	G	A	G	-0.0784228	-0.0155628	0.429891	0.534755	FALSE	FALSE	FALSE	GVY4Ce	10980820	0.51165	0.0237139	TRUE	reported	textfile	0.0147676	1.09343e-07	TRUE	reported	textfile	8279	TRUE	0.00339477	28.1942	22.0219
	rs9545715	C	G	C	G	-0.0728917	0.0282424	0.553703	0.611042	FALSE	TRUE	TRUE	GVY4Ce	81469066	0.244991	0.0242924	TRUE	reported	textfile	0.0151593	1.5215e-06	TRUE	reported	textfile	8279	FALSE	0.0027849	23.1149	22.0219
GCST90199652	rs117022836	T	C	T	C	-0.228706	0.11077	0.0293313	0.979553	FALSE	FALSE	FALSE	GVY4Ce	37651035	0.173987	0.0814785	TRUE	reported	textfile	0.0457893	5.89112e-07	TRUE	reported	textfile	8055	TRUE	0.00308758	24.9413	23.7363
	rs12652405	A	T	A	T	-0.185696	-0.0261114	0.0360831	0.0596685	FALSE	TRUE	FALSE	GVY4Ce	56959725	0.59692	0.0493753	TRUE	reported	textfile	0.041852	9.12308e-06	TRUE	reported	textfile	8055	TRUE	0.00243807	19.6818	23.7363
	rs12965592	C	G	C	G	-0.109671	0.0419153	0.113639	0.130114	FALSE	TRUE	FALSE	GVY4Ce	100297	0.232897	0.0351365	TRUE	reported	textfile	0.0247405	9.30014e-06	TRUE	reported	textfile	8055	TRUE	0.00243356	19.6453	23.7363
	rs13234046	A	G	A	G	-0.0842069	-0.0186523	0.223223	0.875032	FALSE	FALSE	FALSE	GVY4Ce	10971985	0.60002	0.0355708	TRUE	reported	textfile	0.0189265	8.62088e-06	TRUE	reported	textfile	8055	TRUE	0.00245145	19.7901	23.7363
	rs1354034	C	T	C	T	0.138779	-0.00851081	0.609726	0.295236	FALSE	FALSE	FALSE	GVY4Ce	56815721	0.741995	0.025852	TRUE	reported	textfile	0.0159732	3.68039e-18	TRUE	reported	textfile	8055	TRUE	0.00928426	75.4668	23.7363
	rs138806707	C	T	C	T	-0.258703	0.190409	0.0200426	0.988428	FALSE	FALSE	FALSE	GVY4Ce	20999141	0.0915841	0.112862	TRUE	reported	textfile	0.0555882	3.25682e-06	TRUE	reported	textfile	8055	TRUE	0.00268167	21.6536	23.7363
	rs154803	A	T	A	T	0.228935	0.0101974	0.975691	0.96541	FALSE	TRUE	FALSE	GVY4Ce	92789493	0.872219	0.0634005	TRUE	reported	textfile	0.0506099	6.08206e-06	TRUE	reported	textfile	8055	TRUE	0.00253388	20.4572	23.7363
	rs17831607	G	A	G	A	-0.106904	0.0295074	0.139338	0.857598	FALSE	FALSE	FALSE	GVY4Ce	134363401	0.382708	0.0338032	TRUE	reported	textfile	0.0224635	1.94566e-06	TRUE	reported	textfile	8055	TRUE	0.00280381	22.6425	23.7363
	rs2055570	G	A	G	A	-0.135106	-0.0119953	0.927349	0.073288	FALSE	FALSE	FALSE	GVY4Ce	49116770	0.79247	0.0455914	TRUE	reported	textfile	0.0304665	9.22546e-06	TRUE	reported	textfile	8055	TRUE	0.00243545	19.6606	23.7363
	rs55731338	A	G	A	G	-0.21443	-0.122919	0.0289729	0.9371	FALSE	FALSE	FALSE	GVY4Ce	35173215	0.00874219	0.0468802	TRUE	reported	textfile	0.0462655	3.57332e-06	TRUE	reported	textfile	8055	TRUE	0.00265971	21.4758	23.7363
	rs55823223	A	G	A	G	-0.10594	-0.0786397	0.150056	0.91144	FALSE	FALSE	FALSE	GVY4Ce	75894282	0.0543325	0.0408692	TRUE	reported	textfile	0.0217392	1.09794e-06	TRUE	reported	textfile	8055	TRUE	0.0029396	23.7424	23.7363
	rs56058673	T	C	T	C	-0.155282	-0.0297887	0.0591344	0.954737	FALSE	FALSE	FALSE	GVY4Ce	36081699	0.602214	0.057152	TRUE	reported	textfile	0.0336363	3.90287e-06	TRUE	reported	textfile	8055	TRUE	0.00263884	21.3068	23.7363
	rs6871550	C	T	C	T	0.0882151	-0.0182566	0.205068	0.788051	FALSE	FALSE	FALSE	GVY4Ce	399096	0.52633	0.0288133	TRUE	reported	textfile	0.0195516	6.4248e-06	TRUE	reported	textfile	8055	TRUE	0.00252092	20.3523	23.7363
	rs7161063	G	C	G	C	-0.188363	-0.0702537	0.0367098	0.0139409	FALSE	TRUE	FALSE	GVY4Ce	88280172	0.487291	0.101139	TRUE	reported	textfile	0.0410966	4.57413e-06	TRUE	reported	textfile	8055	TRUE	0.00260125	21.0025	23.7363
	rs72761668	G	A	G	A	-0.173508	0.0481792	0.0422211	0.935478	FALSE	FALSE	FALSE	GVY4Ce	101725739	0.330066	0.0494663	TRUE	reported	textfile	0.0382524	5.73656e-06	TRUE	reported	textfile	8055	TRUE	0.0025477	20.569	23.7363
	rs75129304	G	T	G	T	-0.0846584	0.0149449	0.223247	0.828187	FALSE	FALSE	FALSE	GVY4Ce	54070271	0.632525	0.031254	TRUE	reported	textfile	0.0188206	6.85413e-06	TRUE	reported	textfile	8055	TRUE	0.00250564	20.2286	23.7363
	rs78365257	C	G	C	G	-0.294515	-0.0630267	0.0146308	0.00811026	FALSE	TRUE	FALSE	GVY4Ce	116530607	0.626028	0.129332	TRUE	reported	textfile	0.065059	5.98576e-06	TRUE	reported	textfile	8055	TRUE	0.00253765	20.4877	23.7363
	rs78453362	A	G	A	G	0.154741	-0.0408061	0.0541305	0.97513	FALSE	FALSE	FALSE	GVY4Ce	78690859	0.595836	0.076935	TRUE	reported	textfile	0.0347262	8.34918e-06	TRUE	reported	textfile	8055	TRUE	0.00245902	19.8513	23.7363
	rs80312835	G	A	G	A	0.296795	-0.0720776	0.0139821	0.977114	FALSE	FALSE	FALSE	GVY4Ce	110417837	0.370593	0.0805009	TRUE	reported	textfile	0.0661347	7.19855e-06	TRUE	reported	textfile	8055	TRUE	0.00249405	20.1348	23.7363
	rs9277341	C	T	C	T	-0.0774887	0.0211492	0.310012	0.7444	FALSE	FALSE	FALSE	GVY4Ce	33071848	0.432574	0.0269488	TRUE	reported	textfile	0.0166568	3.28633e-06	TRUE	reported	textfile	8055	TRUE	0.00267956	21.6364	23.7363
GCST90199653	rs10868484	C	T	C	T	0.0967565	-0.0250761	0.160135	0.85848	FALSE	FALSE	FALSE	GVY4Ce	86776740	0.454129	0.0334996	TRUE	reported	textfile	0.0211482	4.75862e-06	TRUE	reported	textfile	8271	TRUE	0.0025244	20.9271	21.5454
	rs114128846	A	G	A	G	0.147692	-0.0212043	0.064399	0.961583	FALSE	FALSE	FALSE	GVY4Ce	118280459	0.728902	0.0611803	TRUE	reported	textfile	0.031243	2.27645e-06	TRUE	reported	textfile	8271	TRUE	0.0026945	22.341	21.5454
	rs116926922	T	G	T	G	0.200887	0.0149117	0.0329258	0.975525	FALSE	FALSE	FALSE	GVY4Ce	159958678	0.846792	0.0771776	TRUE	reported	textfile	0.0425847	2.3894e-06	TRUE	reported	textfile	8271	TRUE	0.00268331	22.248	21.5454
	rs12331085	A	G	A	G	-0.0932487	0.00695477	0.264501	0.744938	FALSE	FALSE	FALSE	GVY4Ce	171881699	0.797024	0.0270403	TRUE	reported	textfile	0.0176113	1.19123e-07	TRUE	reported	textfile	8271	TRUE	0.00337812	28.0284	21.5454
	rs142273297	A	G	A	G	0.275401	-0.0078111	0.0154583	0.995982	FALSE	FALSE	FALSE	GVY4Ce	3610520	0.967155	0.189696	TRUE	reported	textfile	0.0618858	8.58129e-06	TRUE	reported	textfile	8271	TRUE	0.00238865	19.799	21.5454
	rs147325198	A	G	A	G	0.312097	0.0384068	0.014061	0.957353	FALSE	FALSE	FALSE	GVY4Ce	9684711	0.518081	0.0594252	TRUE	reported	textfile	0.065423	1.83812e-06	TRUE	reported	textfile	8271	TRUE	0.00274389	22.7517	21.5454
	rs148311684	A	G	A	G	-0.303145	0.133854	0.0126404	0.992222	FALSE	FALSE	FALSE	GVY4Ce	4888680	0.322416	0.135274	TRUE	reported	textfile	0.0683667	9.24546e-06	TRUE	reported	textfile	8271	TRUE	0.0023715	19.6565	21.5454
	rs2676379	G	C	G	C	0.0709062	-0.00394805	0.534699	0.506916	FALSE	TRUE	TRUE	GVY4Ce	46615379	0.866837	0.0235454	TRUE	reported	textfile	0.0153401	3.79536e-06	TRUE	reported	textfile	8271	FALSE	0.00257652	21.3603	21.5454
	rs28704912	A	C	A	C	0.130285	0.0358258	0.0874939	0.933337	FALSE	FALSE	FALSE	GVY4Ce	7928036	0.443974	0.0468006	TRUE	reported	textfile	0.0272362	1.72261e-06	TRUE	reported	textfile	8271	TRUE	0.00275891	22.8766	21.5454
	rs28867983	G	A	G	A	0.0850279	0.0301268	0.201939	0.819033	FALSE	FALSE	FALSE	GVY4Ce	21108584	0.32062	0.0303336	TRUE	reported	textfile	0.019173	9.2171e-06	TRUE	reported	textfile	8271	TRUE	0.00237221	19.6625	21.5454
	rs2996477	C	T	C	T	0.131699	0.027571	0.924975	0.084617	FALSE	FALSE	FALSE	GVY4Ce	91920677	0.511585	0.0420051	TRUE	reported	textfile	0.0294263	7.62133e-06	TRUE	reported	textfile	8271	TRUE	0.00241593	20.0257	21.5454
	rs4485089	G	A	G	A	-0.080974	-0.00505632	0.243905	0.738875	FALSE	FALSE	FALSE	GVY4Ce	12409814	0.850415	0.0268114	TRUE	reported	textfile	0.0179663	6.57522e-06	TRUE	reported	textfile	8271	TRUE	0.00244991	20.3081	21.5454
	rs4698782	C	T	C	T	-0.0728829	-0.00357151	0.439682	0.542383	FALSE	FALSE	FALSE	GVY4Ce	109734125	0.880063	0.0236697	TRUE	reported	textfile	0.0154847	2.51668e-06	TRUE	reported	textfile	8271	TRUE	0.00267132	22.1483	21.5454
	rs4975528	A	G	A	G	0.0782659	0.0158113	0.27399	0.701697	FALSE	FALSE	FALSE	GVY4Ce	1017800	0.542276	0.0259467	TRUE	reported	textfile	0.0173632	6.55743e-06	TRUE	reported	textfile	8271	TRUE	0.00245054	20.3133	21.5454
	rs79292294	G	T	G	T	0.217589	0.0381464	0.0254391	0.961978	FALSE	FALSE	FALSE	GVY4Ce	38215972	0.526283	0.0601971	TRUE	reported	textfile	0.0488736	8.50461e-06	TRUE	reported	textfile	8271	TRUE	0.00239071	19.8162	21.5454
	rs79682447	A	G	A	G	-0.189114	0.0559715	0.0406628	0.966193	FALSE	FALSE	FALSE	GVY4Ce	2260377	0.387428	0.06476	TRUE	reported	textfile	0.0384282	8.59963e-07	TRUE	reported	textfile	8271	TRUE	0.00291957	24.2126	21.5454
	rs9349828	C	T	C	T	0.073257	-0.0195954	0.312933	0.732703	FALSE	FALSE	FALSE	GVY4Ce	56559434	0.465548	0.0268525	TRUE	reported	textfile	0.0164631	8.59628e-06	TRUE	reported	textfile	8271	TRUE	0.00238824	19.7957	21.5454
GCST90199654	rs10194878	C	T	C	T	0.0812524	0.0480982	0.283725	0.740925	FALSE	FALSE	FALSE	GVY4Ce	138639888	0.0732285	0.0268495	TRUE	reported	textfile	0.0177378	4.63326e-06	TRUE	reported	textfile	7840	TRUE	0.00266929	20.9779	22.0887
	rs10459799	G	C	G	C	-0.103929	0.0156191	0.147324	0.11585	FALSE	TRUE	FALSE	GVY4Ce	59963158	0.671058	0.0367772	TRUE	reported	textfile	0.0224526	3.67743e-06	TRUE	reported	textfile	7840	TRUE	0.00272545	21.4205	22.0887
	rs10509810	G	A	G	A	-0.0767333	0.0251751	0.408098	0.552832	FALSE	FALSE	FALSE	GVY4Ce	106005598	0.287306	0.0236597	TRUE	reported	textfile	0.0163837	2.82009e-06	TRUE	reported	textfile	7840	TRUE	0.00279006	21.9297	22.0887
	rs11032948	T	C	T	C	0.0933967	-0.00231244	0.245032	0.773878	FALSE	FALSE	FALSE	GVY4Ce	34951350	0.934749	0.0282448	TRUE	reported	textfile	0.0187015	5.91196e-07	TRUE	reported	textfile	7840	TRUE	0.00317113	24.9344	22.0887
	rs112492033	A	G	A	G	-0.270033	-0.0481395	0.0190433	0.967686	FALSE	FALSE	FALSE	GVY4Ce	80442893	0.474643	0.0673332	TRUE	reported	textfile	0.0581759	3.45602e-06	TRUE	reported	textfile	7840	TRUE	0.00274056	21.5396	22.0887
	rs114830966	A	G	A	G	-0.351981	0.48551	0.0106575	0.994297	FALSE	FALSE	FALSE	GVY4Ce	74384420	0.00722038	0.180722	TRUE	reported	textfile	0.0784625	7.25809e-06	TRUE	reported	textfile	7840	TRUE	0.00256026	20.1189	22.0887
	rs115087674	T	A	T	A	-0.308828	-0.12529	0.0133803	0.00581272	FALSE	TRUE	FALSE	GVY4Ce	155770669	0.427335	0.157843	TRUE	reported	textfile	0.0689018	7.38941e-06	TRUE	reported	textfile	7840	TRUE	0.0025559	20.0845	22.0887
	rs115520044	A	G	A	G	0.30686	-0.0374773	0.0170535	0.989953	FALSE	FALSE	FALSE	GVY4Ce	49488289	0.759142	0.122232	TRUE	reported	textfile	0.0617075	6.59906e-07	TRUE	reported	textfile	7840	TRUE	0.00314428	24.7226	22.0887
	rs11599254	T	C	T	C	0.137987	-0.0387175	0.0840498	0.879836	FALSE	FALSE	FALSE	GVY4Ce	28929032	0.285998	0.0362883	TRUE	reported	textfile	0.0286132	1.41769e-06	TRUE	reported	textfile	7840	TRUE	0.00295761	23.2505	22.0887
	rs118105917	T	C	T	C	-0.385059	0.259065	0.00843666	0.999451	FALSE	FALSE	FALSE	GVY4Ce	159627396	0.621146	0.524184	TRUE	reported	textfile	0.0868612	9.29138e-06	TRUE	reported	textfile	7840	TRUE	0.00250034	19.6468	22.0887
	rs13243315	C	T	C	T	-0.0931508	-0.0221367	0.205073	0.779153	FALSE	FALSE	FALSE	GVY4Ce	25474434	0.436241	0.028433	TRUE	reported	textfile	0.020119	3.6566e-06	TRUE	reported	textfile	7840	TRUE	0.00272683	21.4314	22.0887
	rs143167061	T	C	T	C	-0.255726	-0.0451249	0.0194548	0.981994	FALSE	FALSE	FALSE	GVY4Ce	13186904	0.607469	0.0878447	TRUE	reported	textfile	0.057744	9.48373e-06	TRUE	reported	textfile	7840	TRUE	0.00249537	19.6076	22.0887
	rs150047778	C	T	C	T	-0.357145	-0.273503	0.0108029	0.998519	FALSE	FALSE	FALSE	GVY4Ce	116118257	0.370449	0.305374	TRUE	reported	textfile	0.0775345	4.09938e-06	TRUE	reported	textfile	7840	TRUE	0.00269904	21.2123	22.0887
	rs1503609	A	G	A	G	0.073513	-0.030966	0.352215	0.53005	FALSE	FALSE	FALSE	GVY4Ce	126847694	0.189032	0.0235761	TRUE	reported	textfile	0.0166079	9.58302e-06	TRUE	reported	textfile	7840	TRUE	0.00249287	19.5879	22.0887
	rs150604675	T	C	T	C	-0.211642	0.0266752	0.0306812	0.975164	FALSE	FALSE	FALSE	GVY4Ce	107115055	0.725478	0.0759659	TRUE	reported	textfile	0.0468436	6.24082e-06	TRUE	reported	textfile	7840	TRUE	0.00259692	20.4076	22.0887
	rs17653722	T	G	T	G	-0.0950999	0.0213005	0.170187	0.895785	FALSE	FALSE	FALSE	GVY4Ce	52193734	0.58068	0.0385604	TRUE	reported	textfile	0.0212194	7.40329e-06	TRUE	reported	textfile	7840	TRUE	0.00255545	20.0809	22.0887
	rs2245730	C	A	C	A	-0.0769941	0.0114326	0.434712	0.573923	FALSE	FALSE	FALSE	GVY4Ce	42705218	0.631641	0.0238467	TRUE	reported	textfile	0.0162704	2.22152e-06	TRUE	reported	textfile	7840	TRUE	0.00284816	22.3876	22.0887
	rs2274148	T	C	T	C	0.199304	-0.0425731	0.0333248	0.948992	FALSE	FALSE	FALSE	GVY4Ce	49278988	0.41983	0.0527732	TRUE	reported	textfile	0.0441846	6.46105e-06	TRUE	reported	textfile	7840	TRUE	0.0025885	20.3413	22.0887
	rs28491088	C	A	C	A	0.0994323	0.0468853	0.15482	0.866783	FALSE	FALSE	FALSE	GVY4Ce	24911167	0.181861	0.0351189	TRUE	reported	textfile	0.0223294	8.46886e-06	TRUE	reported	textfile	7840	TRUE	0.00252283	19.8239	22.0887
	rs34563893	C	T	C	T	-0.343882	0.0743385	0.012781	0.947281	FALSE	FALSE	FALSE	GVY4Ce	98038615	0.160475	0.0529674	TRUE	reported	textfile	0.0708587	1.21566e-06	TRUE	reported	textfile	7840	TRUE	0.00299512	23.5462	22.0887
	rs56113850	C	T	C	T	-0.111197	0.0423974	0.573947	0.436431	FALSE	FALSE	FALSE	GVY4Ce	40847202	0.0799374	0.0242126	TRUE	reported	textfile	0.0159364	3.00367e-12	TRUE	reported	textfile	7840	TRUE	0.00617165	48.6738	22.0887
	rs57526497	C	A	C	A	-0.154204	0.0691694	0.940958	0.051764	FALSE	FALSE	FALSE	GVY4Ce	79549816	0.20028	0.0540068	TRUE	reported	textfile	0.0338631	5.27008e-06	TRUE	reported	textfile	7840	TRUE	0.002638	20.7313	22.0887
	rs62017761	G	T	G	T	-0.0738812	0.00756046	0.4716	0.512965	FALSE	FALSE	FALSE	GVY4Ce	6502503	0.750001	0.0237274	TRUE	reported	textfile	0.0158913	3.33291e-06	TRUE	reported	textfile	7840	TRUE	0.0027494	21.6092	22.0887
	rs643104	C	T	C	T	-0.081713	-0.0228519	0.336248	0.676343	FALSE	FALSE	FALSE	GVY4Ce	118696416	0.361858	0.0250616	TRUE	reported	textfile	0.0174577	2.86002e-06	TRUE	reported	textfile	7840	TRUE	0.00278664	21.9027	22.0887
	rs72799346	T	G	T	G	-0.243234	0.0658811	0.0217669	0.985281	FALSE	FALSE	FALSE	GVY4Ce	22414570	0.499098	0.0974703	TRUE	reported	textfile	0.0539023	6.40691e-06	TRUE	reported	textfile	7840	TRUE	0.00259055	20.3574	22.0887
	rs7326993	G	A	G	A	-0.0721645	0.024831	0.532382	0.54665	FALSE	FALSE	FALSE	GVY4Ce	92197195	0.294518	0.0236878	TRUE	reported	textfile	0.0163342	9.96179e-06	TRUE	reported	textfile	7840	TRUE	0.00248345	19.5137	22.0887
	rs75467050	T	C	T	C	-0.181124	-0.0835494	0.0391705	0.972629	FALSE	FALSE	FALSE	GVY4Ce	97703428	0.237619	0.0707471	TRUE	reported	textfile	0.0407723	8.89931e-06	TRUE	reported	textfile	7840	TRUE	0.00251081	19.7293	22.0887
	rs77866717	C	T	C	T	-0.153486	-0.124927	0.0564862	0.975058	FALSE	FALSE	FALSE	GVY4Ce	43307829	0.108683	0.0778778	TRUE	reported	textfile	0.0346997	9.72234e-06	TRUE	reported	textfile	7840	TRUE	0.00248936	19.5603	22.0887
	rs7787264	A	T	A	T	-0.112899	-0.020806	0.110708	0.0987493	FALSE	TRUE	FALSE	GVY4Ce	2667935	0.598751	0.0395403	TRUE	reported	textfile	0.0255469	9.90231e-06	TRUE	reported	textfile	7840	TRUE	0.00248489	19.5251	22.0887
	rs78574673	G	T	G	T	0.228458	0.0710263	0.0254724	0.988207	FALSE	FALSE	FALSE	GVY4Ce	152626771	0.520969	0.110658	TRUE	reported	textfile	0.0504438	5.92737e-06	TRUE	reported	textfile	7840	TRUE	0.00260943	20.5063	22.0887
	rs78607630	G	A	G	A	-0.253719	0.0651686	0.0241997	0.968919	FALSE	FALSE	FALSE	GVY4Ce	107914662	0.327088	0.0664988	TRUE	reported	textfile	0.0518432	9.88221e-07	TRUE	reported	textfile	7840	TRUE	0.00304566	23.9448	22.0887
	rs79361921	A	G	A	G	-0.22819	-0.0845584	0.029188	0.94219	FALSE	FALSE	FALSE	GVY4Ce	58022004	0.0931086	0.0503555	TRUE	reported	textfile	0.0472548	1.37267e-06	TRUE	reported	textfile	7840	TRUE	0.00296548	23.3126	22.0887
	rs9370260	C	T	C	T	0.0811845	0.0255934	0.682724	0.300221	FALSE	FALSE	FALSE	GVY4Ce	54056876	0.316709	0.0255617	TRUE	reported	textfile	0.01711	2.08665e-06	TRUE	reported	textfile	7840	TRUE	0.00286342	22.5079	22.0887
GCST90199655	rs112482875	C	G	C	G	0.183548	0.0545187	0.0370528	0.0581459	FALSE	TRUE	FALSE	GVY4Ce	20468924	0.284698	0.0509604	TRUE	reported	textfile	0.0390382	2.57958e-06	TRUE	reported	textfile	8255	TRUE	0.0026708	22.1011	23.6216
	rs12894999	A	G	A	G	-0.0850341	0.0256209	0.813639	0.207566	FALSE	FALSE	FALSE	GVY4Ce	102071272	0.381307	0.0292646	TRUE	reported	textfile	0.019043	7.99266e-06	TRUE	reported	textfile	8255	TRUE	0.00240963	19.9347	23.6216
	rs2291115	T	C	T	C	-0.0877537	-0.0129651	0.188329	0.731609	FALSE	FALSE	FALSE	GVY4Ce	83555746	0.627577	0.0267243	TRUE	reported	textfile	0.0192477	5.13532e-06	TRUE	reported	textfile	8255	TRUE	0.00251168	20.7811	23.6216
	rs56107485	C	A	C	A	-0.152913	0.0826198	0.0606982	0.968535	FALSE	FALSE	FALSE	GVY4Ce	156517427	0.225166	0.0681173	TRUE	reported	textfile	0.0307105	6.38534e-07	TRUE	reported	textfile	8255	TRUE	0.0029943	24.7862	23.6216
	rs58729469	T	C	T	C	0.0976357	0.00595228	0.159237	0.84345	FALSE	FALSE	FALSE	GVY4Ce	36050283	0.855337	0.0326487	TRUE	reported	textfile	0.0200177	1.07452e-06	TRUE	reported	textfile	8255	TRUE	0.00287357	23.7839	23.6216
	rs6055350	C	G	C	G	-0.186005	0.0892997	0.96283	0.988122	FALSE	TRUE	FALSE	GVY4Ce	858872	0.413519	0.109206	TRUE	reported	textfile	0.0393211	2.24051e-06	TRUE	reported	textfile	8255	TRUE	0.00270337	22.3714	23.6216
	rs6754181	C	T	C	T	0.0935486	0.0194326	0.840504	0.225693	FALSE	FALSE	FALSE	GVY4Ce	29743514	0.490376	0.028175	TRUE	reported	textfile	0.0202835	3.98709e-06	TRUE	reported	textfile	8255	TRUE	0.00257012	21.2659	23.6216
	rs7012455	T	C	T	C	0.0767546	0.011002	0.72081	0.341479	FALSE	FALSE	FALSE	GVY4Ce	51775791	0.658461	0.0248893	TRUE	reported	textfile	0.0165318	3.43625e-06	TRUE	reported	textfile	8255	TRUE	0.00260447	21.5508	23.6216
	rs73597221	A	G	A	G	-0.17389	-0.0492461	0.0466309	0.955118	FALSE	FALSE	FALSE	GVY4Ce	132238300	0.389877	0.0572736	TRUE	reported	textfile	0.0348777	6.17385e-07	TRUE	reported	textfile	8255	TRUE	0.00300214	24.8513	23.6216
	rs75090459	A	G	A	G	0.26568	-0.0432301	0.017058	0.985952	FALSE	FALSE	FALSE	GVY4Ce	22127850	0.671798	0.102035	TRUE	reported	textfile	0.0567147	2.80646e-06	TRUE	reported	textfile	8255	TRUE	0.00265128	21.9392	23.6216
	rs77753167	T	C	T	C	-0.147065	0.0126547	0.0607551	0.925915	FALSE	FALSE	FALSE	GVY4Ce	10814502	0.781104	0.0455401	TRUE	reported	textfile	0.0310573	2.18759e-06	TRUE	reported	textfile	8255	TRUE	0.00270892	22.4174	23.6216
	rs893971	G	A	G	A	0.0924746	-0.00640387	0.399187	0.626516	FALSE	FALSE	FALSE	GVY4Ce	88282518	0.794613	0.0245996	TRUE	reported	textfile	0.0150638	8.31252e-10	TRUE	reported	textfile	8255	TRUE	0.00454444	37.6765	23.6216
GCST90199656	rs11078452	C	A	C	A	-0.266191	0.0114497	0.980903	0.018001	FALSE	FALSE	FALSE	GVY4Ce	3503447	0.89828	0.0895662	TRUE	reported	textfile	0.0555632	1.66138e-06	TRUE	reported	textfile	8242	TRUE	0.00277697	22.946	21.2962
	rs114842896	A	G	A	G	0.30447	0.0590415	0.013081	0.989283	FALSE	FALSE	FALSE	GVY4Ce	99893693	0.612212	0.116471	TRUE	reported	textfile	0.0669031	5.34158e-06	TRUE	reported	textfile	8242	TRUE	0.00250654	20.7058	21.2962
	rs117023050	C	T	C	T	0.16474	-0.0508556	0.0449466	0.944879	FALSE	FALSE	FALSE	GVY4Ce	132005752	0.321067	0.0512519	TRUE	reported	textfile	0.0370405	8.68438e-06	TRUE	reported	textfile	8242	TRUE	0.00239426	19.776	21.2962
	rs13176353	C	G	C	G	-0.114955	0.00860793	0.891315	0.912664	FALSE	TRUE	FALSE	GVY4Ce	1801312	0.835635	0.0414881	TRUE	reported	textfile	0.0245476	2.82755e-06	TRUE	reported	textfile	8242	TRUE	0.0026537	21.9246	21.2962
	rs139986278	C	T	C	T	-0.315708	0.0990602	0.0116698	0.974402	FALSE	FALSE	FALSE	GVY4Ce	79049588	0.19525	0.0764823	TRUE	reported	textfile	0.0706034	7.76506e-06	TRUE	reported	textfile	8242	TRUE	0.00242011	19.9901	21.2962
	rs140560919	C	T	C	T	0.292597	0.0185727	0.0138957	0.957123	FALSE	FALSE	FALSE	GVY4Ce	147564521	0.745921	0.0573192	TRUE	reported	textfile	0.0654917	7.90694e-06	TRUE	reported	textfile	8242	TRUE	0.00241593	19.9555	21.2962
	rs146369127	A	G	A	G	0.269587	0.0192596	0.0185524	0.988123	FALSE	FALSE	FALSE	GVY4Ce	22383982	0.86139	0.110304	TRUE	reported	textfile	0.0567278	2.0112e-06	TRUE	reported	textfile	8242	TRUE	0.00273266	22.5788	21.2962
	rs191105317	G	C	G	C	-0.362577	0.147964	0.0117339	0.0111124	FALSE	TRUE	FALSE	GVY4Ce	128815359	0.206824	0.117213	TRUE	reported	textfile	0.0700538	2.27061e-07	TRUE	reported	textfile	8242	TRUE	0.00323963	26.7813	21.2962
	rs1971157	C	G	C	G	0.0712004	-0.0120174	0.381295	0.430045	FALSE	TRUE	TRUE	GVY4Ce	29598325	0.614766	0.0238782	TRUE	reported	textfile	0.0160318	8.94547e-06	TRUE	reported	textfile	8242	FALSE	0.00238742	19.7195	21.2962
	rs198542	A	G	A	G	0.0702721	0.00914422	0.454857	0.558505	FALSE	FALSE	FALSE	GVY4Ce	50567176	0.700353	0.0237609	TRUE	reported	textfile	0.0153512	4.70302e-06	TRUE	reported	textfile	8242	TRUE	0.00253598	20.9496	21.2962
	rs2016346	C	T	C	T	-0.0742048	-0.014971	0.307059	0.724187	FALSE	FALSE	FALSE	GVY4Ce	135425732	0.571618	0.0264661	TRUE	reported	textfile	0.01661	7.9147e-06	TRUE	reported	textfile	8242	TRUE	0.00241569	19.9535	21.2962
	rs2496679	C	T	C	T	0.213632	0.0768626	0.974437	0.024692	FALSE	FALSE	FALSE	GVY4Ce	80609375	0.303974	0.0747728	TRUE	reported	textfile	0.0481132	8.98791e-06	TRUE	reported	textfile	8242	TRUE	0.00238635	19.7105	21.2962
	rs4649261	G	A	G	A	0.0737226	-0.0332349	0.388522	0.605337	FALSE	FALSE	FALSE	GVY4Ce	233808502	0.16903	0.024165	TRUE	reported	textfile	0.0158935	3.50859e-06	TRUE	reported	textfile	8242	TRUE	0.00260374	21.5108	21.2962
	rs4692540	T	G	T	G	-0.0952962	-0.0338789	0.837001	0.082479	FALSE	FALSE	FALSE	GVY4Ce	26529176	0.424056	0.0423801	TRUE	reported	textfile	0.0204074	3.01657e-06	TRUE	reported	textfile	8242	TRUE	0.00263873	21.8007	21.2962
	rs492467	G	A	G	A	-0.0701385	0.0628401	0.400124	0.670163	FALSE	FALSE	FALSE	GVY4Ce	165912242	0.0119699	0.0250057	TRUE	reported	textfile	0.0156135	7.05018e-06	TRUE	reported	textfile	8242	TRUE	0.00244241	20.1747	21.2962
	rs55839541	A	G	A	G	0.101358	0.0503773	0.139213	0.859482	FALSE	FALSE	FALSE	GVY4Ce	213870367	0.140414	0.0341714	TRUE	reported	textfile	0.0221088	4.55069e-06	TRUE	reported	textfile	8242	TRUE	0.00254359	21.0126	21.2962
	rs56113850	C	T	C	T	-0.076687	0.0423974	0.576131	0.436431	FALSE	FALSE	FALSE	GVY4Ce	40847202	0.0799374	0.0242126	TRUE	reported	textfile	0.0152603	5.02725e-07	TRUE	reported	textfile	8242	TRUE	0.00305461	25.2471	21.2962
	rs651578	C	T	C	T	0.0800674	-0.0594336	0.240034	0.780472	FALSE	FALSE	FALSE	GVY4Ce	25873655	0.0358476	0.0283199	TRUE	reported	textfile	0.01791	7.80184e-06	TRUE	reported	textfile	8242	TRUE	0.002419	19.9809	21.2962
	rs6904845	C	T	C	T	0.0774978	0.0531198	0.743482	0.209857	FALSE	FALSE	FALSE	GVY4Ce	31256646	0.0674714	0.0290507	TRUE	reported	textfile	0.0174619	9.07576e-06	TRUE	reported	textfile	8242	TRUE	0.00238411	19.692	21.2962
	rs72987107	T	C	T	C	-0.255879	0.0557641	0.0209548	0.982942	FALSE	FALSE	FALSE	GVY4Ce	5335243	0.529355	0.0886564	TRUE	reported	textfile	0.0532644	1.55571e-06	TRUE	reported	textfile	8242	TRUE	0.00279221	23.0722	21.2962
	rs7651697	C	T	C	T	0.0706641	0.010353	0.496355	0.454586	FALSE	FALSE	FALSE	GVY4Ce	72185534	0.662731	0.0237375	TRUE	reported	textfile	0.0155505	5.51533e-06	TRUE	reported	textfile	8242	TRUE	0.00249913	20.6445	21.2962
	rs9479849	A	G	A	G	-0.39936	0.111236	0.00753433	0.986351	FALSE	FALSE	FALSE	GVY4Ce	154431131	0.261978	0.0991648	TRUE	reported	textfile	0.0884327	6.30262e-06	TRUE	reported	textfile	8242	TRUE	0.0024683	20.3891	21.2962
GCST90199657	rs1000821	T	C	T	C	0.0955501	-0.0133585	0.460226	0.536475	FALSE	FALSE	FALSE	GVY4Ce	76437921	0.572742	0.0236845	TRUE	reported	textfile	0.0152708	3.92298e-10	TRUE	reported	textfile	8246	TRUE	0.0047254	39.1411	22.7708
	rs10502344	G	A	G	A	0.190151	0.183179	0.0362631	0.976656	FALSE	FALSE	FALSE	GVY4Ce	6107710	0.0194967	0.0784192	TRUE	reported	textfile	0.0413987	4.36607e-06	TRUE	reported	textfile	8246	TRUE	0.00255194	21.092	22.7708
	rs10744901	C	T	C	T	-0.0733906	0.0140636	0.317054	0.632024	FALSE	FALSE	FALSE	GVY4Ce	117707878	0.565369	0.0244634	TRUE	reported	textfile	0.0164198	7.83555e-06	TRUE	reported	textfile	8246	TRUE	0.00241686	19.9728	22.7708
	rs10960927	C	T	C	T	0.157515	0.081425	0.0494112	0.951742	FALSE	FALSE	FALSE	GVY4Ce	13072342	0.140603	0.0552578	TRUE	reported	textfile	0.0353441	8.32674e-06	TRUE	reported	textfile	8246	TRUE	0.00240282	19.8566	22.7708
	rs115939317	T	C	T	C	0.27762	0.130014	0.0153631	0.987029	FALSE	FALSE	FALSE	GVY4Ce	113730518	0.22132	0.106305	TRUE	reported	textfile	0.0620996	7.80146e-06	TRUE	reported	textfile	8246	TRUE	0.00241785	19.9811	22.7708
	rs11986857	G	C	G	C	0.147791	0.0119379	0.0606116	0.105853	FALSE	TRUE	FALSE	GVY4Ce	21182547	0.758172	0.0387743	TRUE	reported	textfile	0.0320867	4.10483e-06	TRUE	reported	textfile	8246	TRUE	0.00256618	21.21	22.7708
	rs138132596	G	A	G	A	0.513535	-0.153652	0.00497814	0.959298	FALSE	FALSE	FALSE	GVY4Ce	130309113	0.00567937	0.0555554	TRUE	reported	textfile	0.109227	2.58227e-06	TRUE	reported	textfile	8246	TRUE	0.00267346	22.0991	22.7708
	rs140079282	A	C	A	C	-0.261606	-0.0834859	0.0184262	0.975503	FALSE	FALSE	FALSE	GVY4Ce	99447594	0.273237	0.0761984	TRUE	reported	textfile	0.056463	3.60008e-06	TRUE	reported	textfile	8246	TRUE	0.00259654	21.4616	22.7708
	rs141116536	C	T	C	T	0.229382	-0.0186241	0.0266543	0.992206	FALSE	FALSE	FALSE	GVY4Ce	1332934	0.889223	0.133709	TRUE	reported	textfile	0.0484838	2.233e-06	TRUE	reported	textfile	8246	TRUE	0.0027071	22.3779	22.7708
	rs1456759	T	C	T	C	-0.0816351	-0.0457221	0.737365	0.173192	FALSE	FALSE	FALSE	GVY4Ce	31547799	0.142574	0.0311825	TRUE	reported	textfile	0.0173502	2.53695e-06	TRUE	reported	textfile	8246	TRUE	0.00267755	22.133	22.7708
	rs1488103	A	G	A	G	-0.0723142	0.0042328	0.393833	0.669932	FALSE	FALSE	FALSE	GVY4Ce	169207806	0.866546	0.0251881	TRUE	reported	textfile	0.015939	5.70756e-06	TRUE	reported	textfile	8246	TRUE	0.00249	20.5788	22.7708
	rs41397245	A	G	A	G	-0.0776802	-0.0427872	0.378124	0.605243	FALSE	FALSE	FALSE	GVY4Ce	77874839	0.0766602	0.0241681	TRUE	reported	textfile	0.0161082	1.41834e-06	TRUE	reported	textfile	8246	TRUE	0.00281229	23.2499	22.7708
	rs6493965	G	A	G	A	-0.0718094	0.0211709	0.644609	0.442098	FALSE	FALSE	FALSE	GVY4Ce	57893963	0.371105	0.0236704	TRUE	reported	textfile	0.0160027	7.21237e-06	TRUE	reported	textfile	8246	TRUE	0.00243598	20.1312	22.7708
	rs71588370	G	A	G	A	0.184415	-0.0103991	0.0394801	0.955685	FALSE	FALSE	FALSE	GVY4Ce	104821478	0.857961	0.0581052	TRUE	reported	textfile	0.0392364	2.60043e-06	TRUE	reported	textfile	8246	TRUE	0.00267183	22.0856	22.7708
	rs7200047	A	G	A	G	0.0725737	-0.0376578	0.49245	0.445943	FALSE	FALSE	FALSE	GVY4Ce	83117864	0.112997	0.0237609	TRUE	reported	textfile	0.0157374	3.99671e-06	TRUE	reported	textfile	8246	TRUE	0.00257235	21.2612	22.7708
	rs9360664	A	G	A	G	-0.0936889	-0.0186722	0.1805	0.825761	FALSE	FALSE	FALSE	GVY4Ce	73331701	0.546228	0.0309438	TRUE	reported	textfile	0.0200697	3.03896e-06	TRUE	reported	textfile	8246	TRUE	0.00263575	21.7866	22.7708
	rs9461721	G	A	G	A	-0.256109	-0.073023	0.0262263	0.99433	FALSE	FALSE	FALSE	GVY4Ce	31770631	0.630378	0.151753	TRUE	reported	textfile	0.0478132	8.48745e-08	TRUE	reported	textfile	8246	TRUE	0.00346739	28.6846	22.7708
GCST90199658	rs10414919	A	G	A	G	-0.0797399	0.0179132	0.280961	0.728063	FALSE	FALSE	FALSE	GVY4Ce	19944477	0.498966	0.0264942	TRUE	reported	textfile	0.0161833	8.33707e-07	TRUE	reported	textfile	8250	TRUE	0.00293418	24.2724	22.3801
	rs10832920	G	A	G	A	-0.0659084	0.0263813	0.539011	0.472338	FALSE	FALSE	FALSE	GVY4Ce	18320322	0.262057	0.0235223	TRUE	reported	textfile	0.0142595	3.79896e-06	TRUE	reported	textfile	8250	TRUE	0.00258283	21.3583	22.3801
	rs113914810	T	C	T	C	0.195815	0.0173138	0.0292252	0.977653	FALSE	FALSE	FALSE	GVY4Ce	72255376	0.82885	0.0800913	TRUE	reported	textfile	0.0434709	6.65286e-06	TRUE	reported	textfile	8250	TRUE	0.00245343	20.2857	22.3801
	rs11715398	T	C	T	C	0.116068	-0.055602	0.105338	0.916907	FALSE	FALSE	FALSE	GVY4Ce	194116327	0.190466	0.0424702	TRUE	reported	textfile	0.0236777	9.48658e-07	TRUE	reported	textfile	8250	TRUE	0.00290422	24.0237	22.3801
	rs142728688	A	G	A	G	-0.23423	0.138629	0.0227938	0.966504	FALSE	FALSE	FALSE	GVY4Ce	154655583	0.031143	0.0643217	TRUE	reported	textfile	0.0483974	1.30022e-06	TRUE	reported	textfile	8250	TRUE	0.0028311	23.4172	22.3801
	rs142808012	T	A	T	A	0.267776	-0.0101183	0.0149562	0.0112561	FALSE	TRUE	FALSE	GVY4Ce	240205226	0.929089	0.113701	TRUE	reported	textfile	0.059366	6.46449e-06	TRUE	reported	textfile	8250	TRUE	0.00246005	20.3405	22.3801
	rs151029917	T	G	T	G	0.405287	-0.0461941	0.0064524	0.991806	FALSE	FALSE	FALSE	GVY4Ce	717462	0.721142	0.12942	TRUE	reported	textfile	0.0904053	7.36017e-06	TRUE	reported	textfile	8250	TRUE	0.00243012	20.0924	22.3801
	rs1808859	C	T	C	T	0.0726542	0.00596973	0.44434	0.614631	FALSE	FALSE	FALSE	GVY4Ce	88313660	0.807058	0.0244437	TRUE	reported	textfile	0.0146613	7.21386e-07	TRUE	reported	textfile	8250	TRUE	0.00296778	24.5511	22.3801
	rs1955284	T	C	T	C	0.0830487	-0.00303783	0.807407	0.219795	FALSE	FALSE	FALSE	GVY4Ce	8556927	0.914637	0.0283403	TRUE	reported	textfile	0.0184612	6.84165e-06	TRUE	reported	textfile	8250	TRUE	0.00244697	20.2321	22.3801
	rs1975533	G	A	G	A	-0.119704	-0.115137	0.116319	0.9265	FALSE	FALSE	FALSE	GVY4Ce	59406582	0.0107835	0.0451582	TRUE	reported	textfile	0.0225894	1.16365e-07	TRUE	reported	textfile	8250	TRUE	0.00339218	28.0739	22.3801
	rs34973031	C	A	C	A	-0.123459	0.0447054	0.0853852	0.90512	FALSE	FALSE	FALSE	GVY4Ce	73870529	0.267731	0.0403369	TRUE	reported	textfile	0.0259273	1.91937e-06	TRUE	reported	textfile	8250	TRUE	0.00274085	22.6686	22.3801
	rs35783478	A	G	A	G	0.0830143	-0.00980999	0.231208	0.72654	FALSE	FALSE	FALSE	GVY4Ce	108308227	0.711055	0.0264819	TRUE	reported	textfile	0.0171179	1.23742e-06	TRUE	reported	textfile	8250	TRUE	0.00284259	23.5125	22.3801
	rs4852728	A	C	A	C	-0.0864222	-0.0334518	0.178937	0.721618	FALSE	FALSE	FALSE	GVY4Ce	70902908	0.20311	0.0262833	TRUE	reported	textfile	0.0188155	4.36647e-06	TRUE	reported	textfile	8250	TRUE	0.00255068	21.0918	22.3801
	rs4934976	A	G	A	G	-0.0731137	0.0355603	0.657788	0.398923	FALSE	FALSE	FALSE	GVY4Ce	33502194	0.139237	0.0240494	TRUE	reported	textfile	0.0155296	2.50131e-06	TRUE	reported	textfile	8250	TRUE	0.00267952	22.1601	22.3801
	rs620617	T	C	T	C	-0.070098	-0.0315278	0.599716	0.354746	FALSE	FALSE	FALSE	GVY4Ce	19446738	0.201615	0.0246897	TRUE	reported	textfile	0.0147602	2.0429e-06	TRUE	reported	textfile	8250	TRUE	0.00272638	22.5487	22.3801
	rs62485457	C	T	C	T	0.228417	-0.0598327	0.0221196	0.950607	FALSE	FALSE	FALSE	GVY4Ce	104917075	0.264427	0.0536141	TRUE	reported	textfile	0.0492927	3.58845e-06	TRUE	reported	textfile	8250	TRUE	0.00259602	21.4677	22.3801
	rs72859389	C	A	C	A	0.132036	0.103921	0.0611044	0.980179	FALSE	FALSE	FALSE	GVY4Ce	8192624	0.20736	0.0824213	TRUE	reported	textfile	0.029663	8.53929e-06	TRUE	reported	textfile	8250	TRUE	0.00239585	19.8084	22.3801
	rs734860	C	T	C	T	0.0779035	0.0377907	0.602667	0.365495	FALSE	FALSE	FALSE	GVY4Ce	173972838	0.122379	0.0244621	TRUE	reported	textfile	0.0152545	3.27446e-07	TRUE	reported	textfile	8250	TRUE	0.00315133	26.0743	22.3801
	rs76445723	T	G	T	G	-0.227203	0.0727359	0.0211627	0.977706	FALSE	FALSE	FALSE	GVY4Ce	19096342	0.348435	0.0775743	TRUE	reported	textfile	0.0503536	6.41715e-06	TRUE	reported	textfile	8250	TRUE	0.00246174	20.3546	22.3801
	rs7737487	A	G	A	G	0.0727989	0.0212477	0.595653	0.359533	FALSE	FALSE	FALSE	GVY4Ce	165055996	0.387903	0.0246086	TRUE	reported	textfile	0.0146176	6.35102e-07	TRUE	reported	textfile	8250	TRUE	0.00299737	24.7966	22.3801
	rs78820411	G	A	G	A	0.170371	0.0215217	0.0386388	0.945151	FALSE	FALSE	FALSE	GVY4Ce	26233756	0.683918	0.052863	TRUE	reported	textfile	0.0373253	5.0068e-06	TRUE	reported	textfile	8250	TRUE	0.00251904	20.8295	22.3801
	rs79376596	G	A	G	A	0.195553	-0.0641864	0.0291836	0.965536	FALSE	FALSE	FALSE	GVY4Ce	2418904	0.317494	0.0642108	TRUE	reported	textfile	0.0432889	6.26065e-06	TRUE	reported	textfile	8250	TRUE	0.00246745	20.4019	22.3801
GCST90199659	rs10789117	C	A	C	A	-0.0805466	0.0321919	0.341811	0.736219	FALSE	FALSE	FALSE	GVY4Ce	62606594	0.227757	0.0266896	TRUE	reported	textfile	0.0157387	3.09195e-07	TRUE	reported	textfile	8260	TRUE	0.00316083	26.1849	22.2435
	rs113735393	A	G	A	G	-0.207519	0.0951729	0.0352927	0.990462	FALSE	FALSE	FALSE	GVY4Ce	81524461	0.420145	0.118055	TRUE	reported	textfile	0.0411356	4.54134e-07	TRUE	reported	textfile	8260	TRUE	0.0030716	25.4434	22.2435
	rs117400415	G	C	G	C	0.0888842	-0.010557	0.186215	0.210187	FALSE	TRUE	FALSE	GVY4Ce	90119386	0.716873	0.0291113	TRUE	reported	textfile	0.0195487	5.44662e-06	TRUE	reported	textfile	8260	TRUE	0.00249659	20.6685	22.2435
	rs13035306	T	C	T	C	-0.156036	-0.000796227	0.05619	0.943224	FALSE	FALSE	FALSE	GVY4Ce	123961851	0.987674	0.0515378	TRUE	reported	textfile	0.0325815	1.67535e-06	TRUE	reported	textfile	8260	TRUE	0.002769	22.9299	22.2435
	rs13265847	G	A	G	A	-0.156331	0.00817708	0.942421	0.09217	FALSE	FALSE	FALSE	GVY4Ce	29804288	0.841805	0.0409704	TRUE	reported	textfile	0.0336519	3.39176e-06	TRUE	reported	textfile	8260	TRUE	0.0026059	21.5757	22.2435
	rs139782415	T	C	T	C	0.126378	-0.0392954	0.0899487	0.884433	FALSE	FALSE	FALSE	GVY4Ce	10514994	0.289277	0.0370813	TRUE	reported	textfile	0.0264791	1.81728e-06	TRUE	reported	textfile	8260	TRUE	0.00275018	22.7736	22.2435
	rs141437456	T	C	T	C	-0.347399	0.100682	0.00988166	0.997616	FALSE	FALSE	FALSE	GVY4Ce	78927185	0.664376	0.23205	TRUE	reported	textfile	0.0764493	5.51496e-06	TRUE	reported	textfile	8260	TRUE	0.00249371	20.6445	22.2435
	rs151115380	T	C	T	C	0.310888	-0.0910216	0.0130281	0.980942	FALSE	FALSE	FALSE	GVY4Ce	164755085	0.296994	0.0872773	TRUE	reported	textfile	0.0661973	2.64817e-06	TRUE	reported	textfile	8260	TRUE	0.00266311	22.0507	22.2435
	rs1555942	A	T	A	T	0.188681	0.10747	0.965825	0.939406	FALSE	TRUE	FALSE	GVY4Ce	68172250	0.0315007	0.04997	TRUE	reported	textfile	0.0418631	6.57211e-06	TRUE	reported	textfile	8260	TRUE	0.00245328	20.309	22.2435
	rs1836921	A	G	A	G	-0.0775788	-0.0437539	0.276299	0.726988	FALSE	FALSE	FALSE	GVY4Ce	104991756	0.0990627	0.0265269	TRUE	reported	textfile	0.0170992	5.70656e-06	TRUE	reported	textfile	8260	TRUE	0.00248584	20.5792	22.2435
	rs2435583	G	A	G	A	-0.0990229	-0.0123148	0.164587	0.783769	FALSE	FALSE	FALSE	GVY4Ce	98703115	0.667493	0.0286664	TRUE	reported	textfile	0.0204562	1.29364e-06	TRUE	reported	textfile	8260	TRUE	0.00282886	23.427	22.2435
	rs35311550	C	T	C	T	-0.322065	0.210875	0.0141818	0.99708	FALSE	FALSE	FALSE	GVY4Ce	542329	0.342678	0.222234	TRUE	reported	textfile	0.0642743	5.42083e-07	TRUE	reported	textfile	8260	TRUE	0.0030305	25.1019	22.2435
	rs4266604	C	T	C	T	0.0745017	0.00651935	0.294749	0.728043	FALSE	FALSE	FALSE	GVY4Ce	52911031	0.805152	0.0264278	TRUE	reported	textfile	0.0166127	7.30464e-06	TRUE	reported	textfile	8260	TRUE	0.00242893	20.107	22.2435
	rs6849130	C	T	C	T	-0.108294	0.0424719	0.118281	0.841485	FALSE	FALSE	FALSE	GVY4Ce	164626088	0.194773	0.0327567	TRUE	reported	textfile	0.0237693	5.21256e-06	TRUE	reported	textfile	8260	TRUE	0.00250672	20.7525	22.2435
	rs7302336	A	G	A	G	0.113218	0.0395268	0.112836	0.894481	FALSE	FALSE	FALSE	GVY4Ce	130523620	0.30422	0.0384717	TRUE	reported	textfile	0.0239989	2.38589e-06	TRUE	reported	textfile	8260	TRUE	0.0026872	22.2507	22.2435
	rs7610125	T	C	T	C	-0.0758416	-0.00114278	0.436891	0.602624	FALSE	FALSE	FALSE	GVY4Ce	152913328	0.962447	0.0242712	TRUE	reported	textfile	0.0155174	1.02115e-06	TRUE	reported	textfile	8260	TRUE	0.00288365	23.8821	22.2435
	rs78765237	A	G	A	G	0.24977	0.179554	0.0204739	0.986542	FALSE	FALSE	FALSE	GVY4Ce	8396478	0.073355	0.100275	TRUE	reported	textfile	0.053264	2.74152e-06	TRUE	reported	textfile	8260	TRUE	0.00265508	21.9841	22.2435
	rs9436300	G	A	G	A	0.0754039	-0.0193286	0.68347	0.435144	FALSE	FALSE	FALSE	GVY4Ce	65429581	0.414966	0.0237107	TRUE	reported	textfile	0.0169789	8.95281e-06	TRUE	reported	textfile	8260	TRUE	0.00238206	19.718	22.2435
GCST90199660	rs102275	C	T	C	T	-0.220549	0.0246387	0.34593	0.584029	FALSE	FALSE	FALSE	GVY4Ce	61790331	0.30131	0.0238371	TRUE	reported	textfile	0.015913	1.11176e-43	TRUE	reported	textfile	8264	TRUE	0.0227162	192.044	33.4791
	rs1061808	G	T	G	T	0.200092	0.0105969	0.631678	0.426399	FALSE	FALSE	FALSE	GVY4Ce	32168770	0.656476	0.0238247	TRUE	reported	textfile	0.0156583	2.15628e-37	TRUE	reported	textfile	8264	TRUE	0.0193768	163.254	33.4791
	rs10778301	A	G	A	G	-0.0693898	-0.00926507	0.461879	0.456911	FALSE	FALSE	FALSE	GVY4Ce	103893299	0.695442	0.0236668	TRUE	reported	textfile	0.0154191	6.78686e-06	TRUE	reported	textfile	8264	TRUE	0.00244467	20.2473	33.4791
	rs117470433	T	C	T	C	0.26326	0.0648915	0.0176685	0.980983	FALSE	FALSE	FALSE	GVY4Ce	4834391	0.45122	0.0861336	TRUE	reported	textfile	0.0585744	6.97514e-06	TRUE	reported	textfile	8264	TRUE	0.00243839	20.1952	33.4791
	rs117752111	G	A	G	A	0.239516	0.0799871	0.0207753	0.954917	FALSE	FALSE	FALSE	GVY4Ce	17379677	0.170462	0.058354	TRUE	reported	textfile	0.0538015	8.51368e-06	TRUE	reported	textfile	8264	TRUE	0.00239249	19.8141	33.4791
	rs12438714	T	G	T	G	-0.138473	0.00129749	0.0645318	0.824873	FALSE	FALSE	FALSE	GVY4Ce	93042745	0.966665	0.0310471	TRUE	reported	textfile	0.0307182	6.54901e-06	TRUE	reported	textfile	8264	TRUE	0.00245291	20.3158	33.4791
	rs12544703	G	A	G	A	-0.106164	0.0198651	0.182667	0.76949	FALSE	FALSE	FALSE	GVY4Ce	58397865	0.481741	0.0282373	TRUE	reported	textfile	0.019997	1.1023e-07	TRUE	reported	textfile	8264	TRUE	0.00339904	28.1786	33.4791
	rs141357957	T	C	T	C	-0.30519	-0.0254763	0.0127443	0.993116	FALSE	FALSE	FALSE	GVY4Ce	9809295	0.855481	0.13988	TRUE	reported	textfile	0.0679417	7.05785e-06	TRUE	reported	textfile	8264	TRUE	0.00243567	20.1726	33.4791
	rs145128297	A	G	A	G	-0.298888	0.117884	0.014713	0.991046	FALSE	FALSE	FALSE	GVY4Ce	25233533	0.338552	0.123177	TRUE	reported	textfile	0.0637577	2.76062e-06	TRUE	reported	textfile	8264	TRUE	0.00265221	21.9708	33.4791
	rs1601935	T	G	T	G	-0.0771848	-0.0232368	0.650326	0.38409	FALSE	FALSE	FALSE	GVY4Ce	58379566	0.33803	0.0242539	TRUE	reported	textfile	0.0168088	4.39154e-06	TRUE	reported	textfile	8264	TRUE	0.00254503	21.0807	33.4791
	rs17231506	T	C	T	C	0.0901668	0.12033	0.325307	0.720891	FALSE	FALSE	FALSE	GVY4Ce	56960616	5.71571e-06	0.026524	TRUE	reported	textfile	0.0162354	2.79678e-08	TRUE	reported	textfile	8264	TRUE	0.00371843	30.8363	33.4791
	rs17248720	T	C	T	C	-0.122497	0.163453	0.113267	0.898887	FALSE	FALSE	FALSE	GVY4Ce	11087511	6.07561e-05	0.0407628	TRUE	reported	textfile	0.0238862	2.92288e-07	TRUE	reported	textfile	8264	TRUE	0.00317239	26.2937	33.4791
	rs183181954	G	A	G	A	0.857517	0.0514666	0.0018173	0.975274	FALSE	FALSE	FALSE	GVY4Ce	11351824	0.50944	0.078014	TRUE	reported	textfile	0.179475	1.77117e-06	TRUE	reported	textfile	8264	TRUE	0.00275479	22.823	33.4791
	rs185772485	G	A	G	A	-0.277576	0.067912	0.0180312	0.961623	FALSE	FALSE	FALSE	GVY4Ce	4381415	0.264927	0.0609173	TRUE	reported	textfile	0.0576862	1.4955e-06	TRUE	reported	textfile	8264	TRUE	0.00279392	23.1481	33.4791
	rs2032969	A	G	A	G	-0.111093	-0.0248982	0.106101	0.817218	FALSE	FALSE	FALSE	GVY4Ce	74709980	0.417143	0.030686	TRUE	reported	textfile	0.0248798	8.00062e-06	TRUE	reported	textfile	8264	TRUE	0.00240682	19.9331	33.4791
	rs2075269	C	T	C	T	-0.0815166	-0.0295894	0.24807	0.652417	FALSE	FALSE	FALSE	GVY4Ce	21001740	0.231269	0.0247177	TRUE	reported	textfile	0.0180752	6.48731e-06	TRUE	reported	textfile	8264	TRUE	0.00245509	20.3339	33.4791
	rs2745311	A	C	A	C	0.0702244	-0.0150689	0.535022	0.510893	FALSE	FALSE	FALSE	GVY4Ce	18577539	0.526404	0.0237865	TRUE	reported	textfile	0.0154888	5.79093e-06	TRUE	reported	textfile	8264	TRUE	0.00248125	20.5511	33.4791
	rs3019671	T	C	T	C	-0.0743413	-0.0487593	0.39617	0.582673	FALSE	FALSE	FALSE	GVY4Ce	134624160	0.0413333	0.0238996	TRUE	reported	textfile	0.0156753	2.11027e-06	TRUE	reported	textfile	8264	TRUE	0.0027143	22.4866	33.4791
	rs45617141	G	T	G	T	0.264148	-0.0502942	0.0177024	0.996564	FALSE	FALSE	FALSE	GVY4Ce	43331199	0.802906	0.201509	TRUE	reported	textfile	0.0582611	5.79112e-06	TRUE	reported	textfile	8264	TRUE	0.00248124	20.551	33.4791
	rs4920834	A	G	A	G	0.0902345	0.0227953	0.764055	0.217662	FALSE	FALSE	FALSE	GVY4Ce	85752257	0.422601	0.0284261	TRUE	reported	textfile	0.0181074	6.25094e-07	TRUE	reported	textfile	8264	TRUE	0.00299599	24.8272	33.4791
	rs57942043	C	A	C	A	0.167765	0.0513809	0.0448804	0.927722	FALSE	FALSE	FALSE	GVY4Ce	73945909	0.266978	0.0462871	TRUE	reported	textfile	0.0372989	6.86419e-06	TRUE	reported	textfile	8264	TRUE	0.00244207	20.2258	33.4791
	rs61979368	T	C	T	C	0.0825341	0.0293064	0.247334	0.769689	FALSE	FALSE	FALSE	GVY4Ce	76348790	0.296274	0.028059	TRUE	reported	textfile	0.0180997	5.11584e-06	TRUE	reported	textfile	8264	TRUE	0.00250982	20.7883	33.4791
	rs6753019	A	G	A	G	-0.0961117	0.0389376	0.837465	0.188005	FALSE	FALSE	FALSE	GVY4Ce	113190582	0.197501	0.0302146	TRUE	reported	textfile	0.0210504	4.97633e-06	TRUE	reported	textfile	8264	TRUE	0.00251621	20.8414	33.4791
	rs72728195	C	T	C	T	-0.0764083	0.0231868	0.307461	0.712421	FALSE	FALSE	FALSE	GVY4Ce	137578752	0.372863	0.0260198	TRUE	reported	textfile	0.0166291	4.33073e-06	TRUE	reported	textfile	8264	TRUE	0.00254827	21.1076	33.4791
	rs7320739	G	T	G	T	-0.0957937	0.0470448	0.166891	0.827953	FALSE	FALSE	FALSE	GVY4Ce	106285700	0.133098	0.0313215	TRUE	reported	textfile	0.0206722	3.58761e-06	TRUE	reported	textfile	8264	TRUE	0.00259169	21.4682	33.4791
	rs7900015	A	G	A	G	0.160184	0.00975238	0.0481855	0.945331	FALSE	FALSE	FALSE	GVY4Ce	23801354	0.851263	0.0520109	TRUE	reported	textfile	0.0357053	7.24796e-06	TRUE	reported	textfile	8264	TRUE	0.00242955	20.1218	33.4791
	rs9374755	C	T	C	T	-0.0754855	0.00987283	0.306209	0.695933	FALSE	FALSE	FALSE	GVY4Ce	97711860	0.699929	0.0256161	TRUE	reported	textfile	0.0167415	6.51662e-06	TRUE	reported	textfile	8264	TRUE	0.00245404	20.3251	33.4791
GCST90199661	rs10504250	G	C	G	C	-0.0742667	-0.0124699	0.32379	0.315447	FALSE	TRUE	FALSE	GVY4Ce	58286174	0.623141	0.025376	TRUE	reported	textfile	0.0165607	7.30761e-06	TRUE	reported	textfile	8171	TRUE	0.00245521	20.1059	21.8506
	rs115520044	A	G	A	G	0.286001	-0.0374773	0.0166093	0.989953	FALSE	FALSE	FALSE	GVY4Ce	49488289	0.759142	0.122232	TRUE	reported	textfile	0.0604766	2.25496e-06	TRUE	reported	textfile	8171	TRUE	0.00272959	22.3591	21.8506
	rs116633901	G	T	G	T	0.224574	0.0954786	0.0244785	0.991052	FALSE	FALSE	FALSE	GVY4Ce	148481453	0.449818	0.126342	TRUE	reported	textfile	0.0501538	7.54464e-06	TRUE	reported	textfile	8171	TRUE	0.00244778	20.0449	21.8506
	rs116882896	G	A	G	A	-0.166328	-0.0245913	0.0467255	0.950059	FALSE	FALSE	FALSE	GVY4Ce	58754233	0.646191	0.0535689	TRUE	reported	textfile	0.0373322	8.37579e-06	TRUE	reported	textfile	8171	TRUE	0.00242345	19.8453	21.8506
	rs117247923	A	G	A	G	0.285202	-0.103591	0.0161251	0.96382	FALSE	FALSE	FALSE	GVY4Ce	108564519	0.105503	0.0639947	TRUE	reported	textfile	0.0612361	3.20202e-06	TRUE	reported	textfile	8171	TRUE	0.00264767	21.6862	21.8506
	rs12376985	G	A	G	A	0.1074	-0.00384071	0.119885	0.906708	FALSE	FALSE	FALSE	GVY4Ce	134200542	0.923857	0.0401847	TRUE	reported	textfile	0.023991	7.58163e-06	TRUE	reported	textfile	8171	TRUE	0.00244666	20.0357	21.8506
	rs13200335	A	C	A	C	-0.0760477	-0.00640425	0.40824	0.60106	FALSE	FALSE	FALSE	GVY4Ce	41723085	0.790533	0.0241107	TRUE	reported	textfile	0.0156955	1.26496e-06	TRUE	reported	textfile	8171	TRUE	0.00286484	23.4701	21.8506
	rs139060216	C	T	C	T	-0.195659	-0.0573835	0.0331348	0.979806	FALSE	FALSE	FALSE	GVY4Ce	242382913	0.494971	0.0840879	TRUE	reported	textfile	0.0433217	6.28953e-06	TRUE	reported	textfile	8171	TRUE	0.00249018	20.3931	21.8506
	rs150357582	T	G	T	G	-0.424684	-0.443341	0.00817154	0.998783	FALSE	FALSE	FALSE	GVY4Ce	24390851	0.162447	0.317377	TRUE	reported	textfile	0.0860667	8.04149e-07	TRUE	reported	textfile	8171	TRUE	0.00297094	24.3419	21.8506
	rs2472297	T	C	T	C	0.0860376	-0.0226654	0.250184	0.751785	FALSE	FALSE	FALSE	GVY4Ce	74735539	0.404697	0.0272008	TRUE	reported	textfile	0.0177102	1.18529e-06	TRUE	reported	textfile	8171	TRUE	0.00288006	23.5952	21.8506
	rs3856630	C	T	C	T	0.247925	-0.163282	0.0194312	0.996207	FALSE	FALSE	FALSE	GVY4Ce	137699699	0.375465	0.184232	TRUE	reported	textfile	0.0558662	9.08718e-06	TRUE	reported	textfile	8171	TRUE	0.00240448	19.6896	21.8506
	rs6137886	G	T	G	T	0.165992	-0.00323878	0.047164	0.946039	FALSE	FALSE	FALSE	GVY4Ce	23286377	0.949881	0.051527	TRUE	reported	textfile	0.0366881	6.0563e-06	TRUE	reported	textfile	8171	TRUE	0.00249898	20.4653	21.8506
	rs61457016	G	T	G	T	-0.269244	0.0199575	0.0211932	0.993484	FALSE	FALSE	FALSE	GVY4Ce	40579494	0.881992	0.134444	TRUE	reported	textfile	0.0526641	3.17963e-07	TRUE	reported	textfile	8171	TRUE	0.0031886	26.131	21.8506
	rs61880906	C	A	C	A	-0.160747	0.0226679	0.0528864	0.896689	FALSE	FALSE	FALSE	GVY4Ce	35453504	0.575139	0.0404424	TRUE	reported	textfile	0.0347303	3.68428e-06	TRUE	reported	textfile	8171	TRUE	0.00261491	21.4172	21.8506
	rs62337911	G	A	G	A	-0.191127	0.0553968	0.0398995	0.973333	FALSE	FALSE	FALSE	GVY4Ce	182887202	0.448996	0.0731705	TRUE	reported	textfile	0.0392515	1.12e-06	TRUE	reported	textfile	8171	TRUE	0.00289333	23.7042	21.8506
	rs6553200	T	C	T	C	-0.0778103	-0.00321334	0.273903	0.74117	FALSE	FALSE	FALSE	GVY4Ce	188374075	0.905112	0.0269561	TRUE	reported	textfile	0.017129	5.55614e-06	TRUE	reported	textfile	8171	TRUE	0.00251907	20.6302	21.8506
	rs7245628	A	G	A	G	0.076776	-0.0090388	0.684799	0.253368	FALSE	FALSE	FALSE	GVY4Ce	570206	0.740046	0.0272424	TRUE	reported	textfile	0.0170744	6.90652e-06	TRUE	reported	textfile	8171	TRUE	0.00246838	20.2141	21.8506
	rs72710584	G	A	G	A	-0.105459	-0.106934	0.140637	0.902989	FALSE	FALSE	FALSE	GVY4Ce	171037487	0.00612238	0.0390104	TRUE	reported	textfile	0.0227622	3.60232e-06	TRUE	reported	textfile	8171	TRUE	0.00262014	21.4601	21.8506
	rs73073176	T	C	T	C	-0.120147	0.0541889	0.130699	0.910654	FALSE	FALSE	FALSE	GVY4Ce	17523328	0.188859	0.0412408	TRUE	reported	textfile	0.0230713	1.91233e-07	TRUE	reported	textfile	8171	TRUE	0.00330802	27.1129	21.8506
	rs73396358	T	G	T	G	-0.142941	-0.0484027	0.0625536	0.935586	FALSE	FALSE	FALSE	GVY4Ce	115022298	0.315647	0.0482366	TRUE	reported	textfile	0.0315949	6.06315e-06	TRUE	reported	textfile	8171	TRUE	0.00249872	20.4632	21.8506
	rs74069834	G	A	G	A	-0.276781	0.0742312	0.0174547	0.986156	FALSE	FALSE	FALSE	GVY4Ce	21946362	0.457135	0.0998303	TRUE	reported	textfile	0.0589389	2.65226e-06	TRUE	reported	textfile	8171	TRUE	0.00269168	22.0476	21.8506
	rs75102017	C	G	C	G	-0.344294	0.0342397	0.0104294	0.0144532	FALSE	TRUE	FALSE	GVY4Ce	69166680	0.724676	0.0972118	TRUE	reported	textfile	0.075865	5.67231e-06	TRUE	reported	textfile	8171	TRUE	0.00251424	20.5906	21.8506
	rs76680658	C	G	C	G	-0.200611	0.0292744	0.0357502	0.0675765	FALSE	TRUE	FALSE	GVY4Ce	5075878	0.535678	0.0472655	TRUE	reported	textfile	0.0420445	1.82957e-06	TRUE	reported	textfile	8171	TRUE	0.00277848	22.7607	21.8506
GCST90199662	rs112755187	T	C	T	C	-0.177624	-0.0263725	0.0442732	0.955641	FALSE	FALSE	FALSE	GVY4Ce	16997625	0.651093	0.0583147	TRUE	reported	textfile	0.0377539	2.54124e-06	TRUE	reported	textfile	7862	TRUE	0.00280754	22.1294	21.6203
	rs114248797	G	T	G	T	0.36155	-0.360555	0.00987764	0.997249	FALSE	FALSE	FALSE	GVY4Ce	31395382	0.127032	0.236288	TRUE	reported	textfile	0.0786193	4.25051e-06	TRUE	reported	textfile	7862	TRUE	0.00268274	21.1431	21.6203
	rs117350340	C	T	C	T	-0.16461	-0.0591067	0.0487695	0.919198	FALSE	FALSE	FALSE	GVY4Ce	70423053	0.166627	0.0427342	TRUE	reported	textfile	0.0364871	6.43849e-06	TRUE	reported	textfile	7862	TRUE	0.00258213	20.3481	21.6203
	rs117546625	G	A	G	A	-0.236693	0.156347	0.0268893	0.994729	FALSE	FALSE	FALSE	GVY4Ce	81252545	0.338186	0.163243	TRUE	reported	textfile	0.0482055	9.10349e-07	TRUE	reported	textfile	7862	TRUE	0.00305714	24.1028	21.6203
	rs117742113	T	C	T	C	-0.234768	-0.101292	0.0245285	0.963286	FALSE	FALSE	FALSE	GVY4Ce	73348103	0.109805	0.0633446	TRUE	reported	textfile	0.0504297	3.23437e-06	TRUE	reported	textfile	7862	TRUE	0.00274901	21.6668	21.6203
	rs142706506	G	T	G	T	0.254733	0.0981229	0.0209884	0.9712	FALSE	FALSE	FALSE	GVY4Ce	66591545	0.177874	0.0728277	TRUE	reported	textfile	0.0544181	2.8543e-06	TRUE	reported	textfile	7862	TRUE	0.00277934	21.9065	21.6203
	rs150981358	A	G	A	G	0.227853	0.0436668	0.0266753	0.943419	FALSE	FALSE	FALSE	GVY4Ce	30545016	0.403621	0.0522848	TRUE	reported	textfile	0.0482807	2.36619e-06	TRUE	reported	textfile	7862	TRUE	0.00282489	22.2665	21.6203
	rs188242626	T	C	T	C	-0.239692	-0.00680131	0.0252273	0.950845	FALSE	FALSE	FALSE	GVY4Ce	24360811	0.902109	0.0552961	TRUE	reported	textfile	0.0496341	1.37102e-06	TRUE	reported	textfile	7862	TRUE	0.00295752	23.315	21.6203
	rs2407999	G	A	G	A	0.114291	0.00399411	0.121513	0.854095	FALSE	FALSE	FALSE	GVY4Ce	123961638	0.905184	0.0335314	TRUE	reported	textfile	0.0243102	2.58439e-06	TRUE	reported	textfile	7862	TRUE	0.00280346	22.0972	21.6203
	rs35721219	T	C	T	C	0.162517	-0.0421485	0.0488957	0.962674	FALSE	FALSE	FALSE	GVY4Ce	1452378	0.491525	0.0612726	TRUE	reported	textfile	0.0360284	6.45813e-06	TRUE	reported	textfile	7862	TRUE	0.00258138	20.3422	21.6203
	rs4815566	T	C	T	C	0.111171	0.0750822	0.112645	0.892912	FALSE	FALSE	FALSE	GVY4Ce	3100992	0.0484529	0.0380477	TRUE	reported	textfile	0.0247376	6.98957e-06	TRUE	reported	textfile	7862	TRUE	0.00256225	20.191	21.6203
	rs59173308	A	G	A	G	-0.171301	-0.130413	0.0465636	0.979954	FALSE	FALSE	FALSE	GVY4Ce	185056021	0.118241	0.0834805	TRUE	reported	textfile	0.036733	3.11005e-06	TRUE	reported	textfile	7862	TRUE	0.00275851	21.7419	21.6203
	rs7047835	C	T	C	T	-0.147304	0.0412687	0.939029	0.052909	FALSE	FALSE	FALSE	GVY4Ce	36999904	0.434105	0.0527607	TRUE	reported	textfile	0.0325318	5.95455e-06	TRUE	reported	textfile	7862	TRUE	0.00260105	20.4976	21.6203
	rs8014050	G	A	G	A	-0.0705248	0.0143497	0.411232	0.571365	FALSE	FALSE	FALSE	GVY4Ce	98902364	0.546427	0.0237924	TRUE	reported	textfile	0.0158333	8.4206e-06	TRUE	reported	textfile	7862	TRUE	0.00251717	19.8349	21.6203
	rs80329585	C	A	C	A	-0.348749	-0.00851486	0.0104605	0.987655	FALSE	FALSE	FALSE	GVY4Ce	33912188	0.937839	0.109184	TRUE	reported	textfile	0.0765056	5.15269e-06	TRUE	reported	textfile	7862	TRUE	0.00263609	20.7744	21.6203
	rs887829	T	C	T	C	0.0820467	0.0292908	0.324211	0.608077	FALSE	FALSE	FALSE	GVY4Ce	233759924	0.225903	0.0241876	TRUE	reported	textfile	0.0165917	7.61251e-07	TRUE	reported	textfile	7862	TRUE	0.00310069	24.4472	21.6203
	rs9295793	A	C	A	C	-0.0973961	-0.0972734	0.155247	0.849339	FALSE	FALSE	FALSE	GVY4Ce	29129992	0.00259914	0.0323	TRUE	reported	textfile	0.0213833	5.24433e-06	TRUE	reported	textfile	7862	TRUE	0.00263182	20.7407	21.6203
GCST90199663	rs10101376	G	A	G	A	0.0755876	-0.0320741	0.388492	0.64675	FALSE	FALSE	FALSE	GVY4Ce	1296114	0.19378	0.0246823	TRUE	reported	textfile	0.0168628	7.37679e-06	TRUE	reported	textfile	7135	TRUE	0.00280819	20.0872	21.527
	rs11040389	T	C	T	C	0.0796657	0.0130331	0.434185	0.579373	FALSE	FALSE	FALSE	GVY4Ce	6040911	0.585959	0.023927	TRUE	reported	textfile	0.0165432	1.46752e-06	TRUE	reported	textfile	7135	TRUE	0.00323967	23.1837	21.527
	rs114393741	A	G	A	G	0.302597	-0.0822007	0.0144521	0.997984	FALSE	FALSE	FALSE	GVY4Ce	38869235	0.782829	0.298224	TRUE	reported	textfile	0.068433	9.78836e-06	TRUE	reported	textfile	7135	TRUE	0.00273285	19.5468	21.527
	rs116272095	C	G	C	G	0.318113	-0.0787378	0.015461	0.0321972	FALSE	TRUE	FALSE	GVY4Ce	205356835	0.244869	0.0677079	TRUE	reported	textfile	0.0666451	1.8128e-06	TRUE	reported	textfile	7135	TRUE	0.00318308	22.7774	21.527
	rs116938011	T	C	T	C	-0.380537	0.0321569	0.00979701	0.964415	FALSE	FALSE	FALSE	GVY4Ce	28999791	0.625237	0.0658359	TRUE	reported	textfile	0.0845499	6.77187e-06	TRUE	reported	textfile	7135	TRUE	0.00283102	20.251	21.527
	rs12319193	T	G	T	G	0.439649	-0.0147764	0.00835909	0.952036	FALSE	FALSE	FALSE	GVY4Ce	70404643	0.790424	0.0556005	TRUE	reported	textfile	0.0912265	1.4405e-06	TRUE	reported	textfile	7135	TRUE	0.00324463	23.2193	21.527
	rs12354542	C	T	C	T	-0.175898	0.0134	0.0506867	0.940313	FALSE	FALSE	FALSE	GVY4Ce	109553005	0.789193	0.0501198	TRUE	reported	textfile	0.0373161	2.43208e-06	TRUE	reported	textfile	7135	TRUE	0.00310445	22.213	21.527
	rs12444105	G	A	G	A	-0.0782771	-0.0313582	0.63628	0.335149	FALSE	FALSE	FALSE	GVY4Ce	82423578	0.209405	0.0249826	TRUE	reported	textfile	0.0172342	5.57301e-06	TRUE	reported	textfile	7135	TRUE	0.00288296	20.6236	21.527
	rs12878900	G	A	G	A	-0.132112	0.00773186	0.112711	0.927535	FALSE	FALSE	FALSE	GVY4Ce	84867017	0.863671	0.0450305	TRUE	reported	textfile	0.0261536	4.38603e-07	TRUE	reported	textfile	7135	TRUE	0.0035635	25.5094	21.527
	rs13102958	G	A	G	A	0.0755964	0.00215691	0.417198	0.581346	FALSE	FALSE	FALSE	GVY4Ce	86957477	0.928303	0.0239709	TRUE	reported	textfile	0.0167714	6.561e-06	TRUE	reported	textfile	7135	TRUE	0.00283945	20.3115	21.527
	rs144625636	T	C	T	C	0.317716	-0.167771	0.0136746	0.995771	FALSE	FALSE	FALSE	GVY4Ce	76289291	0.330207	0.172303	TRUE	reported	textfile	0.0716714	9.29501e-06	TRUE	reported	textfile	7135	TRUE	0.00274662	19.6456	21.527
	rs1521039	G	A	G	A	-0.133494	0.0140595	0.890797	0.149399	FALSE	FALSE	FALSE	GVY4Ce	12987641	0.67019	0.0330123	TRUE	reported	textfile	0.0265452	4.93156e-07	TRUE	reported	textfile	7135	TRUE	0.003532	25.2831	21.527
	rs1969346	T	C	T	C	0.169438	-0.103792	0.0494096	0.971024	FALSE	FALSE	FALSE	GVY4Ce	183586691	0.143527	0.0709551	TRUE	reported	textfile	0.0381465	8.92236e-06	TRUE	reported	textfile	7135	TRUE	0.00275752	19.7238	21.527
	rs3767942	G	A	G	A	0.0875381	-0.0288468	0.268484	0.745542	FALSE	FALSE	FALSE	GVY4Ce	40825859	0.287584	0.027126	TRUE	reported	textfile	0.018901	3.632e-06	TRUE	reported	textfile	7135	TRUE	0.00299728	21.4439	21.527
	rs4355631	G	A	G	A	-0.0795996	-0.0275144	0.491424	0.508064	FALSE	FALSE	FALSE	GVY4Ce	131505809	0.245034	0.0236684	TRUE	reported	textfile	0.017082	3.16418e-06	TRUE	reported	textfile	7135	TRUE	0.00303411	21.7081	21.527
	rs6756669	G	A	G	A	0.0812734	-0.00163578	0.713592	0.440621	FALSE	FALSE	FALSE	GVY4Ce	190845343	0.945058	0.0237364	TRUE	reported	textfile	0.018386	9.85196e-06	TRUE	reported	textfile	7135	TRUE	0.00273112	19.5344	21.527
	rs739244	G	A	G	A	-0.0872158	0.0395848	0.748831	0.264652	FALSE	FALSE	FALSE	GVY4Ce	49666510	0.140795	0.0268766	TRUE	reported	textfile	0.0188382	3.66143e-06	TRUE	reported	textfile	7135	TRUE	0.00299512	21.4284	21.527
	rs76793324	C	T	C	T	0.293567	0.0220737	0.0163265	0.990582	FALSE	FALSE	FALSE	GVY4Ce	89262202	0.853714	0.119717	TRUE	reported	textfile	0.0653061	6.94898e-06	TRUE	reported	textfile	7135	TRUE	0.00282413	20.2016	21.527
	rs78621707	A	G	A	G	0.278554	0.0485255	0.021614	0.973158	FALSE	FALSE	FALSE	GVY4Ce	38278308	0.509628	0.0735883	TRUE	reported	textfile	0.0565295	8.32509e-07	TRUE	reported	textfile	7135	TRUE	0.00339156	24.2743	21.527
	rs79284264	C	T	C	T	0.231367	-0.231905	0.0256537	0.985099	FALSE	FALSE	FALSE	GVY4Ce	19806821	0.0172707	0.0974025	TRUE	reported	textfile	0.0522866	9.64488e-06	TRUE	reported	textfile	7135	TRUE	0.00273677	19.5749	21.527
GCST90199664	rs10802092	T	A	T	A	0.0695791	0.0203713	0.593586	0.623342	FALSE	TRUE	FALSE	GVY4Ce	119392884	0.402239	0.0243202	TRUE	reported	textfile	0.0148237	2.68229e-06	TRUE	reported	textfile	8235	TRUE	0.00266821	22.0262	32.6903
	rs10834052	C	T	C	T	0.0807497	0.0778906	0.802512	0.124898	FALSE	FALSE	FALSE	GVY4Ce	1433445	0.0295951	0.0358041	TRUE	reported	textfile	0.0182606	9.77604e-06	TRUE	reported	textfile	8235	TRUE	0.00236896	19.55	32.6903
	rs11076256	T	C	T	C	0.447662	0.0390569	0.0778439	0.942423	FALSE	FALSE	FALSE	GVY4Ce	58718562	0.441731	0.0507711	TRUE	reported	textfile	0.0265192	6.2441e-64	TRUE	reported	textfile	8235	TRUE	0.0334458	284.888	32.6903
	rs116721959	T	C	T	C	-0.21061	0.109378	0.0251855	0.97773	FALSE	FALSE	FALSE	GVY4Ce	136773975	0.174908	0.0806263	TRUE	reported	textfile	0.0459716	4.62048e-06	TRUE	reported	textfile	8235	TRUE	0.0025422	20.9833	32.6903
	rs12529420	A	G	A	G	0.0674951	-0.0331244	0.381239	0.679791	FALSE	FALSE	FALSE	GVY4Ce	169029431	0.189065	0.0252213	TRUE	reported	textfile	0.0150882	7.69938e-06	TRUE	reported	textfile	8235	TRUE	0.00242411	20.0062	32.6903
	rs13396369	T	C	T	C	0.0893767	-0.0264769	0.187179	0.773846	FALSE	FALSE	FALSE	GVY4Ce	113254175	0.348207	0.0282248	TRUE	reported	textfile	0.0186298	1.60652e-06	TRUE	reported	textfile	8235	TRUE	0.00278713	23.0105	32.6903
	rs143277630	T	C	T	C	-0.194762	0.02598	0.0478586	0.959775	FALSE	FALSE	FALSE	GVY4Ce	58781671	0.666165	0.06022	TRUE	reported	textfile	0.0339985	1.01287e-08	TRUE	reported	textfile	8235	TRUE	0.00396916	32.8083	32.6903
	rs143566944	T	C	T	C	0.287805	0.00108741	0.0130189	0.97663	FALSE	FALSE	FALSE	GVY4Ce	41623472	0.988945	0.07848	TRUE	reported	textfile	0.0642476	7.47717e-06	TRUE	reported	textfile	8235	TRUE	0.00243087	20.0621	32.6903
	rs17634070	A	T	A	T	0.154338	0.0129367	0.0544231	0.0856411	FALSE	TRUE	FALSE	GVY4Ce	133177859	0.7678	0.0438154	TRUE	reported	textfile	0.033383	3.77759e-06	TRUE	reported	textfile	8235	TRUE	0.00258884	21.3693	32.6903
	rs17783490	T	G	T	G	0.165104	0.0778379	0.0427215	0.94477	FALSE	FALSE	FALSE	GVY4Ce	90256821	0.139034	0.0526146	TRUE	reported	textfile	0.035623	3.5738e-06	TRUE	reported	textfile	8235	TRUE	0.00260171	21.4758	32.6903
	rs2359874	T	C	T	C	0.0730231	0.0118693	0.61135	0.412554	FALSE	FALSE	FALSE	GVY4Ce	77382351	0.619879	0.0239291	TRUE	reported	textfile	0.0149781	1.08636e-06	TRUE	reported	textfile	8235	TRUE	0.00287801	23.763	32.6903
	rs34064769	A	C	A	C	0.0678602	-0.00845665	0.525012	0.417662	FALSE	FALSE	FALSE	GVY4Ce	217776399	0.723549	0.0239077	TRUE	reported	textfile	0.0145435	3.07118e-06	TRUE	reported	textfile	8235	TRUE	0.00263683	21.7664	32.6903
	rs35446494	G	A	G	A	0.171055	0.0888023	0.0382979	0.939488	FALSE	FALSE	FALSE	GVY4Ce	119095413	0.0732976	0.0495834	TRUE	reported	textfile	0.0375046	5.09335e-06	TRUE	reported	textfile	8235	TRUE	0.00251967	20.7968	32.6903
	rs4291084	G	A	G	A	-0.082695	0.00510372	0.724661	0.260642	FALSE	FALSE	FALSE	GVY4Ce	23214941	0.84881	0.026772	TRUE	reported	textfile	0.016704	7.39797e-07	TRUE	reported	textfile	8235	TRUE	0.00296731	24.5026	32.6903
	rs56381820	C	T	C	T	0.0842604	-0.00263132	0.203436	0.786895	FALSE	FALSE	FALSE	GVY4Ce	62164419	0.927412	0.0288834	TRUE	reported	textfile	0.0180851	3.17568e-06	TRUE	reported	textfile	8235	TRUE	0.00262905	21.702	32.6903
	rs7141384	G	T	G	T	-0.0706039	0.0343433	0.333722	0.689247	FALSE	FALSE	FALSE	GVY4Ce	43591995	0.177019	0.0254397	TRUE	reported	textfile	0.0152423	3.61956e-06	TRUE	reported	textfile	8235	TRUE	0.00259874	21.4512	32.6903
	rs73351721	A	G	A	G	-0.14389	-0.0403564	0.061443	0.939149	FALSE	FALSE	FALSE	GVY4Ce	58437193	0.406121	0.0485788	TRUE	reported	textfile	0.0302864	2.02424e-06	TRUE	reported	textfile	8235	TRUE	0.00273347	22.5663	32.6903
	rs73396011	G	A	G	A	0.149295	0.0588862	0.0595044	0.94379	FALSE	FALSE	FALSE	GVY4Ce	3779667	0.252321	0.0514411	TRUE	reported	textfile	0.0310577	1.53204e-06	TRUE	reported	textfile	8235	TRUE	0.00279815	23.1018	32.6903
	rs73669981	T	C	T	C	-0.194512	0.0695975	0.034831	0.952433	FALSE	FALSE	FALSE	GVY4Ce	128861549	0.210944	0.0556347	TRUE	reported	textfile	0.039425	8.06738e-07	TRUE	reported	textfile	8235	TRUE	0.00294716	24.3357	32.6903
	rs74546847	T	C	T	C	-0.242796	0.00293953	0.0222438	0.968529	FALSE	FALSE	FALSE	GVY4Ce	34303331	0.964922	0.0668414	TRUE	reported	textfile	0.0487618	6.38388e-07	TRUE	reported	textfile	8235	TRUE	0.00300161	24.7867	32.6903
	rs78199411	C	T	C	T	0.183637	0.066179	0.0356752	0.973337	FALSE	FALSE	FALSE	GVY4Ce	137191426	0.358059	0.0720065	TRUE	reported	textfile	0.0391572	2.73534e-06	TRUE	reported	textfile	8235	TRUE	0.00266364	21.9883	32.6903
	rs7867041	A	G	A	G	0.0783952	0.035946	0.226371	0.80616	FALSE	FALSE	FALSE	GVY4Ce	120012695	0.225485	0.0296566	TRUE	reported	textfile	0.0173588	6.29683e-06	TRUE	reported	textfile	8235	TRUE	0.0024706	20.3908	32.6903
	rs79724540	T	C	T	C	-0.117073	0.0105816	0.112452	0.900556	FALSE	FALSE	FALSE	GVY4Ce	180175657	0.790125	0.0397585	TRUE	reported	textfile	0.0231742	4.37544e-07	TRUE	reported	textfile	8235	TRUE	0.00308956	25.5152	32.6903
	rs937475	G	A	G	A	-0.0703956	0.0218757	0.599404	0.405414	FALSE	FALSE	FALSE	GVY4Ce	102854494	0.359773	0.0238871	TRUE	reported	textfile	0.0148295	2.06466e-06	TRUE	reported	textfile	8235	TRUE	0.0027289	22.5285	32.6903
	rs9470970	A	G	A	G	-0.145262	-0.0284607	0.0663122	0.920516	FALSE	FALSE	FALSE	GVY4Ce	39126256	0.509794	0.0431774	TRUE	reported	textfile	0.0290503	5.72199e-07	TRUE	reported	textfile	8235	TRUE	0.00302707	24.9975	32.6903
	rs9476273	A	T	A	T	-0.0860871	0.0088729	0.168047	0.129576	FALSE	TRUE	FALSE	GVY4Ce	60653341	0.799405	0.0349166	TRUE	reported	textfile	0.0194551	9.64816e-06	TRUE	reported	textfile	8235	TRUE	0.002372	19.5751	32.6903
GCST90199665	rs10845794	T	G	T	G	-0.0705395	-0.0144054	0.536408	0.526412	FALSE	FALSE	FALSE	GVY4Ce	13509204	0.541544	0.0235968	TRUE	reported	textfile	0.0158112	8.1442e-06	TRUE	reported	textfile	8148	TRUE	0.00243683	19.8989	20.9883
	rs11073480	G	A	G	A	0.0960883	0.0058169	0.157032	0.912591	FALSE	FALSE	FALSE	GVY4Ce	96379916	0.887255	0.0410281	TRUE	reported	textfile	0.021254	6.1561e-06	TRUE	reported	textfile	8148	TRUE	0.00250219	20.434	20.9883
	rs113199593	G	A	G	A	-0.318765	-0.145028	0.0116265	0.981279	FALSE	FALSE	FALSE	GVY4Ce	13424059	0.103668	0.0891205	TRUE	reported	textfile	0.0717581	8.90352e-06	TRUE	reported	textfile	8148	TRUE	0.00241601	19.7284	20.9883
	rs117572246	A	G	A	G	-0.335037	0.0194003	0.0128793	0.948702	FALSE	FALSE	FALSE	GVY4Ce	83954847	0.732219	0.0566969	TRUE	reported	textfile	0.0692125	1.29385e-06	TRUE	reported	textfile	8148	TRUE	0.0028676	23.4266	20.9883
	rs11868853	G	A	G	A	0.0822351	-0.0284004	0.260506	0.764862	FALSE	FALSE	FALSE	GVY4Ce	72270399	0.308126	0.0278664	TRUE	reported	textfile	0.0175866	2.92522e-06	TRUE	reported	textfile	8148	TRUE	0.00267631	21.8597	20.9883
	rs12039358	G	T	G	T	-0.0910294	0.0233379	0.227402	0.680664	FALSE	FALSE	FALSE	GVY4Ce	159607962	0.358995	0.0254425	TRUE	reported	textfile	0.0184878	8.49033e-07	TRUE	reported	textfile	8148	TRUE	0.00296655	24.2374	20.9883
	rs139706814	G	A	G	A	-0.196608	0.0547944	0.0328242	0.952253	FALSE	FALSE	FALSE	GVY4Ce	15960932	0.31659	0.0547129	TRUE	reported	textfile	0.0437219	6.89914e-06	TRUE	reported	textfile	8148	TRUE	0.00247558	20.2161	20.9883
	rs150753233	G	A	G	A	0.388784	-0.0894052	0.00908417	0.981296	FALSE	FALSE	FALSE	GVY4Ce	79040461	0.308687	0.0878262	TRUE	reported	textfile	0.0814519	1.81348e-06	TRUE	reported	textfile	8148	TRUE	0.00278837	22.7776	20.9883
	rs150965318	C	T	C	T	-0.209464	-0.125736	0.0276535	0.967742	FALSE	FALSE	FALSE	GVY4Ce	181780441	0.0675305	0.0687783	TRUE	reported	textfile	0.0468532	7.79847e-06	TRUE	reported	textfile	8148	TRUE	0.00244695	19.9818	20.9883
	rs2025408	A	C	A	C	-0.336702	-0.0105188	0.0106869	0.986534	FALSE	FALSE	FALSE	GVY4Ce	30670785	0.917489	0.101535	TRUE	reported	textfile	0.0757383	8.76491e-06	TRUE	reported	textfile	8148	TRUE	0.00241968	19.7585	20.9883
	rs2248456	A	G	A	G	0.0745846	-0.0122264	0.494379	0.444186	FALSE	FALSE	FALSE	GVY4Ce	88032614	0.605445	0.0236676	TRUE	reported	textfile	0.0154974	1.48899e-06	TRUE	reported	textfile	8148	TRUE	0.00283463	23.1566	20.9883
	rs35308250	C	A	C	A	0.0764696	0.0300863	0.292432	0.702763	FALSE	FALSE	FALSE	GVY4Ce	177997870	0.242413	0.0257373	TRUE	reported	textfile	0.0169105	6.12521e-06	TRUE	reported	textfile	8148	TRUE	0.00250337	20.4436	20.9883
	rs35911794	C	T	C	T	0.192938	0.0337762	0.0338346	0.955175	FALSE	FALSE	FALSE	GVY4Ce	119061863	0.555132	0.0572394	TRUE	reported	textfile	0.042974	7.13446e-06	TRUE	reported	textfile	8148	TRUE	0.00246774	20.152	20.9883
	rs409751	T	C	T	C	0.0743278	-0.0159135	0.558491	0.49344	FALSE	FALSE	FALSE	GVY4Ce	22924624	0.499681	0.0235759	TRUE	reported	textfile	0.0161645	4.26133e-06	TRUE	reported	textfile	8148	TRUE	0.00258822	21.1384	20.9883
	rs62127223	A	G	A	G	-0.136176	0.0439651	0.0820923	0.902368	FALSE	FALSE	FALSE	GVY4Ce	45870207	0.267658	0.0396628	TRUE	reported	textfile	0.0283979	1.62445e-06	TRUE	reported	textfile	8148	TRUE	0.00281419	22.9891	20.9883
	rs74509445	T	C	T	C	-0.139499	0.0497325	0.0667167	0.923149	FALSE	FALSE	FALSE	GVY4Ce	80975048	0.264969	0.0446142	TRUE	reported	textfile	0.0313242	8.4528e-06	TRUE	reported	textfile	8148	TRUE	0.00242815	19.8278	20.9883
	rs74895134	A	G	A	G	0.266447	-0.0996736	0.0166503	0.996205	FALSE	FALSE	FALSE	GVY4Ce	71385691	0.584511	0.182283	TRUE	reported	textfile	0.0599771	8.89292e-06	TRUE	reported	textfile	8148	TRUE	0.00241629	19.7308	20.9883
	rs79315153	G	A	G	A	-0.10644	0.00213196	0.116476	0.888921	FALSE	FALSE	FALSE	GVY4Ce	116831071	0.954382	0.0372691	TRUE	reported	textfile	0.0237273	7.25895e-06	TRUE	reported	textfile	8148	TRUE	0.00246372	20.119	20.9883
	rs80135198	T	C	T	C	0.27184	-0.0605321	0.0169512	0.969163	FALSE	FALSE	FALSE	GVY4Ce	66572172	0.388136	0.0701412	TRUE	reported	textfile	0.0603487	6.65316e-06	TRUE	reported	textfile	8148	TRUE	0.00248405	20.2854	20.9883
	rs9869057	C	T	C	T	-0.811824	0.00426298	0.998185	0.039753	FALSE	FALSE	FALSE	GVY4Ce	66407622	0.943814	0.0604875	TRUE	reported	textfile	0.183334	9.50571e-06	TRUE	reported	textfile	8148	TRUE	0.00240073	19.6034	20.9883
GCST90199666	rs10157929	G	C	G	C	0.101191	-0.00724447	0.139648	0.271023	FALSE	TRUE	FALSE	GVY4Ce	64949885	0.78586	0.0266644	TRUE	reported	textfile	0.0219394	3.98265e-06	TRUE	reported	textfile	8256	TRUE	0.00257008	21.2681	25.7912
	rs111269071	C	T	C	T	0.139429	-0.0475656	0.0679766	0.902293	FALSE	FALSE	FALSE	GVY4Ce	98016962	0.227764	0.0394362	TRUE	reported	textfile	0.0302597	4.07088e-06	TRUE	reported	textfile	8256	TRUE	0.00256503	21.2262	25.7912
	rs113511960	T	C	T	C	-0.28963	0.27413	0.015033	0.996908	FALSE	FALSE	FALSE	GVY4Ce	27520714	0.180042	0.204479	TRUE	reported	textfile	0.0631312	4.48072e-06	TRUE	reported	textfile	8256	TRUE	0.00254287	21.0423	25.7912
	rs114684303	A	C	A	C	-0.326277	-0.040505	0.0122771	0.985745	FALSE	FALSE	FALSE	GVY4Ce	173290818	0.676197	0.096981	TRUE	reported	textfile	0.0685956	1.96945e-06	TRUE	reported	textfile	8256	TRUE	0.00273289	22.6191	25.7912
	rs1171623	T	G	T	G	0.105784	0.00197137	0.224491	0.648312	FALSE	FALSE	FALSE	GVY4Ce	59703726	0.936593	0.0247806	TRUE	reported	textfile	0.018426	9.41016e-09	TRUE	reported	textfile	8256	TRUE	0.00397629	32.9513	25.7912
	rs12205483	T	C	T	C	-0.234035	0.0111574	0.0220643	0.962415	FALSE	FALSE	FALSE	GVY4Ce	21309401	0.861922	0.0641495	TRUE	reported	textfile	0.0522496	7.49341e-06	TRUE	reported	textfile	8256	TRUE	0.00242422	20.0581	25.7912
	rs12210538	G	A	G	A	-0.169243	-0.0115856	0.238471	0.838479	FALSE	FALSE	FALSE	GVY4Ce	110438805	0.716374	0.0318893	TRUE	reported	textfile	0.0176414	8.51296e-22	TRUE	reported	textfile	8256	TRUE	0.0110248	92.0132	25.7912
	rs12907371	C	G	C	G	0.107415	0.0110697	0.119042	0.127015	FALSE	TRUE	FALSE	GVY4Ce	100266916	0.757548	0.0358588	TRUE	reported	textfile	0.0238374	6.60189e-06	TRUE	reported	textfile	8256	TRUE	0.00245344	20.3005	25.7912
	rs13386197	G	C	G	C	0.150287	0.0402215	0.0520528	0.0289687	FALSE	TRUE	FALSE	GVY4Ce	47571449	0.557933	0.0686473	TRUE	reported	textfile	0.033948	9.55699e-06	TRUE	reported	textfile	8256	TRUE	0.00236818	19.5934	25.7912
	rs138066517	T	C	T	C	-0.18999	0.0265455	0.0341557	0.923365	FALSE	FALSE	FALSE	GVY4Ce	36800135	0.549495	0.0443521	TRUE	reported	textfile	0.042387	7.38534e-06	TRUE	reported	textfile	8256	TRUE	0.00242757	20.0859	25.7912
	rs143370068	T	C	T	C	-0.313926	0.110138	0.0121017	0.995616	FALSE	FALSE	FALSE	GVY4Ce	151384678	0.558493	0.188244	TRUE	reported	textfile	0.0696259	6.52081e-06	TRUE	reported	textfile	8256	TRUE	0.00245626	20.3239	25.7912
	rs174544	A	C	A	C	-0.0864977	0.0271031	0.301651	0.613649	FALSE	FALSE	FALSE	GVY4Ce	61800281	0.260972	0.0241111	TRUE	reported	textfile	0.0165349	1.6841e-07	TRUE	reported	textfile	8256	TRUE	0.00330369	27.359	25.7912
	rs17569868	C	A	C	A	0.0839015	0.0158691	0.211224	0.861201	FALSE	FALSE	FALSE	GVY4Ce	39827239	0.640849	0.0340164	TRUE	reported	textfile	0.0186144	6.56434e-06	TRUE	reported	textfile	8256	TRUE	0.00245473	20.3112	25.7912
	rs1799822	G	A	G	A	0.084205	-0.0286251	0.22902	0.861776	FALSE	FALSE	FALSE	GVY4Ce	53213557	0.398169	0.0338801	TRUE	reported	textfile	0.0181362	3.43522e-06	TRUE	reported	textfile	8256	TRUE	0.00260424	21.5515	25.7912
	rs2167534	A	G	A	G	-0.0774604	-0.000673119	0.310582	0.700934	FALSE	FALSE	FALSE	GVY4Ce	106063072	0.979413	0.0260853	TRUE	reported	textfile	0.0172303	6.9379e-06	TRUE	reported	textfile	8256	TRUE	0.00244198	20.2055	25.7912
	rs2612989	A	G	A	G	0.0945784	-0.00757383	0.822267	0.141417	FALSE	FALSE	FALSE	GVY4Ce	180741150	0.821089	0.0334911	TRUE	reported	textfile	0.0198049	1.79262e-06	TRUE	reported	textfile	8256	TRUE	0.00275468	22.7999	25.7912
	rs2631367	G	C	G	C	0.123473	0.0175146	0.522391	0.65529	FALSE	TRUE	TRUE	GVY4Ce	132369766	0.481953	0.0249083	TRUE	reported	textfile	0.0151912	4.36667e-16	TRUE	reported	textfile	8256	FALSE	0.00793832	66.0472	25.7912
	rs2963905	A	C	A	C	-0.0810907	0.0315942	0.716492	0.303609	FALSE	FALSE	FALSE	GVY4Ce	9860625	0.21862	0.025682	TRUE	reported	textfile	0.0169006	1.60178e-06	TRUE	reported	textfile	8256	TRUE	0.00278073	23.0161	25.7912
	rs6029454	G	C	G	C	-0.157828	-0.024092	0.0473096	0.0332853	FALSE	TRUE	FALSE	GVY4Ce	40940425	0.718826	0.0669172	TRUE	reported	textfile	0.0354391	8.44814e-06	TRUE	reported	textfile	8256	TRUE	0.00239657	19.8288	25.7912
	rs62264777	C	G	C	G	-0.106325	0.0296664	0.138361	0.214743	FALSE	TRUE	FALSE	GVY4Ce	117934668	0.298787	0.0285518	TRUE	reported	textfile	0.0219678	1.29823e-06	TRUE	reported	textfile	8256	TRUE	0.00282942	23.4203	25.7912
	rs7069718	T	A	T	A	0.0805832	-0.00650374	0.774869	0.787273	FALSE	TRUE	FALSE	GVY4Ce	57423364	0.81921	0.0284551	TRUE	reported	textfile	0.0181037	8.53953e-06	TRUE	reported	textfile	8256	TRUE	0.00239411	19.8084	25.7912
	rs7143692	G	A	G	A	0.0865656	0.0110068	0.207493	0.813314	FALSE	FALSE	FALSE	GVY4Ce	77232936	0.716358	0.0302941	TRUE	reported	textfile	0.0187875	4.07316e-06	TRUE	reported	textfile	8256	TRUE	0.00256488	21.225	25.7912
	rs72696241	A	G	A	G	0.0788913	0.0144605	0.276009	0.682969	FALSE	FALSE	FALSE	GVY4Ce	154232217	0.568586	0.0253632	TRUE	reported	textfile	0.0170751	3.83246e-06	TRUE	reported	textfile	8256	TRUE	0.00257894	21.3416	25.7912
	rs72777087	G	A	G	A	0.0928261	-0.00982719	0.170976	0.741023	FALSE	FALSE	FALSE	GVY4Ce	92421692	0.716345	0.0270462	TRUE	reported	textfile	0.0202234	4.43193e-06	TRUE	reported	textfile	8256	TRUE	0.0025454	21.0633	25.7912
	rs72906893	T	C	T	C	0.0927839	-0.0877892	0.176603	0.824646	FALSE	FALSE	FALSE	GVY4Ce	185389163	0.00389278	0.0304114	TRUE	reported	textfile	0.0204954	5.98074e-06	TRUE	reported	textfile	8256	TRUE	0.0024762	20.4893	25.7912
	rs75555206	A	G	A	G	-0.22333	0.0760044	0.0239287	0.968515	FALSE	FALSE	FALSE	GVY4Ce	68326876	0.250782	0.0661799	TRUE	reported	textfile	0.0498164	7.35818e-06	TRUE	reported	textfile	8256	TRUE	0.00242842	20.093	25.7912
	rs78422675	T	C	T	C	0.557491	0.0539216	0.00466836	0.969202	FALSE	FALSE	FALSE	GVY4Ce	72567505	0.427281	0.067924	TRUE	reported	textfile	0.111628	5.90816e-07	TRUE	reported	textfile	8256	TRUE	0.00301196	24.9359	25.7912
	rs79450911	T	C	T	C	-0.240404	-0.0160247	0.0222007	0.97475	FALSE	FALSE	FALSE	GVY4Ce	149250498	0.838379	0.078565	TRUE	reported	textfile	0.0517006	3.32062e-06	TRUE	reported	textfile	8256	TRUE	0.00261208	21.6166	25.7912
	rs887477	C	A	C	A	0.0717292	-0.00434215	0.515027	0.419702	FALSE	FALSE	FALSE	GVY4Ce	6336816	0.855441	0.0238343	TRUE	reported	textfile	0.0155223	3.81827e-06	TRUE	reported	textfile	8256	TRUE	0.00257981	21.3489	25.7912
GCST90199667	rs111274172	T	A	T	A	0.264806	0.0809431	0.0193261	0.0135593	FALSE	TRUE	FALSE	GVY4Ce	38117116	0.424251	0.101297	TRUE	reported	textfile	0.0526607	4.94236e-07	TRUE	reported	textfile	8167	TRUE	0.00308658	25.2799	26.4074
	rs116078994	A	C	A	C	0.252839	-0.0606151	0.0183301	0.961517	FALSE	FALSE	FALSE	GVY4Ce	41058781	0.325242	0.0616168	TRUE	reported	textfile	0.0537262	2.52558e-06	TRUE	reported	textfile	8167	TRUE	0.00270444	22.1416	26.4074
	rs117113173	G	C	G	C	0.245682	0.0337648	0.0231459	0.0073544	FALSE	TRUE	FALSE	GVY4Ce	32380400	0.798618	0.13234	TRUE	reported	textfile	0.0480425	3.15665e-07	TRUE	reported	textfile	8167	TRUE	0.00319186	26.145	26.4074
	rs12633047	T	C	T	C	0.130274	-0.0962765	0.0692572	0.966017	FALSE	FALSE	FALSE	GVY4Ce	53359817	0.136139	0.064601	TRUE	reported	textfile	0.0282786	4.08865e-06	TRUE	reported	textfile	8167	TRUE	0.00259185	21.2175	26.4074
	rs12893100	T	C	T	C	0.0721428	0.0298483	0.291436	0.688394	FALSE	FALSE	FALSE	GVY4Ce	90695719	0.238088	0.0252999	TRUE	reported	textfile	0.016087	7.30705e-06	TRUE	reported	textfile	8167	TRUE	0.00245643	20.1062	26.4074
	rs142601344	T	C	T	C	0.34102	0.0140064	0.0113622	0.987665	FALSE	FALSE	FALSE	GVY4Ce	165864102	0.897253	0.108465	TRUE	reported	textfile	0.0685053	6.42442e-07	TRUE	reported	textfile	8167	TRUE	0.00302505	24.7745	26.4074
	rs144368133	G	A	G	A	-0.33485	-0.117233	0.0107812	0.964381	FALSE	FALSE	FALSE	GVY4Ce	57931118	0.0635521	0.0631881	TRUE	reported	textfile	0.0704029	1.97275e-06	TRUE	reported	textfile	8167	TRUE	0.0027622	22.6159	26.4074
	rs148188291	G	A	G	A	-0.312133	0.0998154	0.011176	0.995727	FALSE	FALSE	FALSE	GVY4Ce	21282765	0.57334	0.177248	TRUE	reported	textfile	0.068299	4.87511e-06	TRUE	reported	textfile	8167	TRUE	0.00255081	20.8807	26.4074
	rs150074699	A	G	A	G	1.31346	0.0495541	0.000613196	0.941243	FALSE	FALSE	FALSE	GVY4Ce	64594052	0.333977	0.0512911	TRUE	reported	textfile	0.291544	6.63157e-06	TRUE	reported	textfile	8167	TRUE	0.00247905	20.2917	26.4074
	rs150921780	T	C	T	C	0.157491	-0.059802	0.0444772	0.974956	FALSE	FALSE	FALSE	GVY4Ce	43342695	0.412306	0.0729434	TRUE	reported	textfile	0.0349348	6.53989e-06	TRUE	reported	textfile	8167	TRUE	0.00248229	20.3184	26.4074
	rs181823223	T	C	T	C	-0.108427	-0.00417929	0.117225	0.8356	FALSE	FALSE	FALSE	GVY4Ce	32514486	0.896321	0.0320718	TRUE	reported	textfile	0.02309	2.65528e-06	TRUE	reported	textfile	8167	TRUE	0.00269273	22.0455	26.4074
	rs1865475	A	G	A	G	-0.115293	-0.0300672	0.0960525	0.920774	FALSE	FALSE	FALSE	GVY4Ce	55114297	0.492122	0.04377	TRUE	reported	textfile	0.0244655	2.44721e-06	TRUE	reported	textfile	8167	TRUE	0.00271179	22.202	26.4074
	rs27598	A	G	A	G	-0.0675333	0.0141268	0.616334	0.331447	FALSE	FALSE	FALSE	GVY4Ce	50862465	0.57168	0.0249775	TRUE	reported	textfile	0.0149044	5.86762e-06	TRUE	reported	textfile	8167	TRUE	0.00250758	20.5258	26.4074
	rs35208507	G	A	G	A	-0.0782231	-0.0665074	0.310554	0.687594	FALSE	FALSE	FALSE	GVY4Ce	20377607	0.00801272	0.0250826	TRUE	reported	textfile	0.0157699	7.03917e-07	TRUE	reported	textfile	8167	TRUE	0.00300361	24.5983	26.4074
	rs376874259	G	T	G	T	-0.178181	0.0645997	0.0422138	0.956818	FALSE	FALSE	FALSE	GVY4Ce	176310423	0.270563	0.0586329	TRUE	reported	textfile	0.0359668	7.26855e-07	TRUE	reported	textfile	8167	TRUE	0.00299608	24.5365	26.4074
	rs4426692	G	A	G	A	-0.068372	0.0191511	0.331673	0.637692	FALSE	FALSE	FALSE	GVY4Ce	84693906	0.434371	0.0244983	TRUE	reported	textfile	0.0152462	7.30789e-06	TRUE	reported	textfile	8167	TRUE	0.00245642	20.1061	26.4074
	rs553220097	C	G	C	G	2.05383	0.0982691	0.000260383	0.0221876	FALSE	TRUE	FALSE	GVY4Ce	62517059	0.236602	0.0830309	TRUE	reported	textfile	0.460821	8.31522e-06	TRUE	reported	textfile	8167	TRUE	0.00242631	19.859	26.4074
	rs55769487	T	C	T	C	0.0923657	-0.0168079	0.152674	0.795441	FALSE	FALSE	FALSE	GVY4Ce	127080539	0.564786	0.0291932	TRUE	reported	textfile	0.0199838	3.79984e-06	TRUE	reported	textfile	8167	TRUE	0.00260896	21.3579	26.4074
	rs71480323	A	G	A	G	-0.101121	0.0275366	0.123767	0.925016	FALSE	FALSE	FALSE	GVY4Ce	116900884	0.538202	0.0447361	TRUE	reported	textfile	0.0217504	3.33285e-06	TRUE	reported	textfile	8167	TRUE	0.0026396	21.6094	26.4074
	rs72692616	A	G	A	G	-0.333531	0.0199105	0.0535583	0.88723	FALSE	FALSE	FALSE	GVY4Ce	45941615	0.595092	0.0374629	TRUE	reported	textfile	0.0319348	1.55926e-25	TRUE	reported	textfile	8167	TRUE	0.0131801	109.053	26.4074
	rs79695006	G	A	G	A	0.146655	0.00744148	0.0571607	0.941085	FALSE	FALSE	FALSE	GVY4Ce	108293669	0.883093	0.0506052	TRUE	reported	textfile	0.0312792	2.75113e-06	TRUE	reported	textfile	8167	TRUE	0.00268443	21.9774	26.4074
	rs9596367	C	G	C	G	0.0684595	-0.0210489	0.443135	0.377626	FALSE	TRUE	TRUE	GVY4Ce	50789856	0.3873	0.0243473	TRUE	reported	textfile	0.0146956	3.18537e-06	TRUE	reported	textfile	8167	FALSE	0.00265019	21.6963	26.4074
	rs9813594	C	T	C	T	-0.0730144	-0.00432303	0.659893	0.311762	FALSE	FALSE	FALSE	GVY4Ce	109996814	0.864942	0.0254166	TRUE	reported	textfile	0.0154387	2.253e-06	TRUE	reported	textfile	8167	TRUE	0.00273115	22.3609	26.4074
	rs9858049	T	C	T	C	-0.135463	-0.0262384	0.123202	0.815459	FALSE	FALSE	FALSE	GVY4Ce	53243795	0.393787	0.0307684	TRUE	reported	textfile	0.0219498	6.76417e-10	TRUE	reported	textfile	8167	TRUE	0.00464191	38.078	26.4074
GCST90199668	rs113915691	A	G	A	G	-0.138771	-0.0154311	0.0625	0.891855	FALSE	FALSE	FALSE	GVY4Ce	56248382	0.689425	0.038613	TRUE	reported	textfile	0.0308238	6.72984e-06	TRUE	reported	textfile	8242	TRUE	0.00245316	20.2637	60.7774
	rs117138561	T	C	T	C	0.345285	-0.351831	0.00930119	0.998478	FALSE	FALSE	FALSE	GVY4Ce	78559627	0.214459	0.283415	TRUE	reported	textfile	0.0773593	8.06713e-06	TRUE	reported	textfile	8242	TRUE	0.00241129	19.917	60.7774
	rs1171617	T	G	T	G	0.152178	-0.00390131	0.768951	0.160504	FALSE	FALSE	FALSE	GVY4Ce	59707424	0.902633	0.03189	TRUE	reported	textfile	0.0180475	3.39535e-17	TRUE	reported	textfile	8242	TRUE	0.00855277	71.0828	60.7774
	rs117548628	A	G	A	G	-0.272418	-0.323007	0.016033	0.99022	FALSE	FALSE	FALSE	GVY4Ce	70520580	0.00243243	0.106546	TRUE	reported	textfile	0.059426	4.55821e-06	TRUE	reported	textfile	8242	TRUE	0.0025432	21.0094	60.7774
	rs117907282	A	G	A	G	-0.347706	0.0583352	0.00977772	0.994764	FALSE	FALSE	FALSE	GVY4Ce	21078686	0.733219	0.171149	TRUE	reported	textfile	0.0762	5.04116e-06	TRUE	reported	textfile	8242	TRUE	0.00251992	20.8166	60.7774
	rs1391967	G	A	G	A	-0.0857333	0.00281575	0.187232	0.801245	FALSE	FALSE	FALSE	GVY4Ce	1322878	0.923503	0.0293239	TRUE	reported	textfile	0.0192503	8.44367e-06	TRUE	reported	textfile	8242	TRUE	0.00240075	19.8298	60.7774
	rs141882839	A	G	A	G	0.245572	0.0546699	0.0257707	0.971226	FALSE	FALSE	FALSE	GVY4Ce	7573189	0.443238	0.0713021	TRUE	reported	textfile	0.0474263	2.24314e-07	TRUE	reported	textfile	8242	TRUE	0.00324247	26.8049	60.7774
	rs144724596	T	C	T	C	0.433125	-0.0649806	0.00693515	0.967895	FALSE	FALSE	FALSE	GVY4Ce	104841775	0.326806	0.0662683	TRUE	reported	textfile	0.0902822	1.60694e-06	TRUE	reported	textfile	8242	TRUE	0.0027847	23.01	60.7774
	rs149556176	C	T	C	T	0.49122	-0.0351256	0.0140408	0.996834	FALSE	FALSE	FALSE	GVY4Ce	74971148	0.871331	0.216867	TRUE	reported	textfile	0.0634609	9.90147e-15	TRUE	reported	textfile	8242	TRUE	0.00721708	59.901	60.7774
	rs16865990	G	A	G	A	-0.356033	-0.33786	0.0100306	0.996721	FALSE	FALSE	FALSE	GVY4Ce	224459365	0.105644	0.208802	TRUE	reported	textfile	0.075046	2.09342e-06	TRUE	reported	textfile	8242	TRUE	0.00272338	22.5019	60.7774
	rs17843902	C	T	C	T	-0.0833266	-0.00842466	0.296766	0.739759	FALSE	FALSE	FALSE	GVY4Ce	158719996	0.753342	0.0268099	TRUE	reported	textfile	0.0163535	3.48112e-07	TRUE	reported	textfile	8242	TRUE	0.00314013	25.9562	60.7774
	rs2185152	T	C	T	C	-0.4316	0.0022334	0.30837	0.736172	FALSE	FALSE	FALSE	GVY4Ce	75758325	0.933649	0.026826	TRUE	reported	textfile	0.0153412	3.83431e-174	TRUE	reported	textfile	8242	TRUE	0.0876171	791.296	60.7774
	rs2631367	G	C	G	C	0.104741	0.0175146	0.522736	0.65529	FALSE	TRUE	TRUE	GVY4Ce	132369766	0.481953	0.0249083	TRUE	reported	textfile	0.0149388	2.35995e-12	TRUE	reported	textfile	8242	FALSE	0.00592907	49.147	60.7774
	rs28540007	C	T	C	T	-0.239621	-0.0483956	0.0204714	0.991123	FALSE	FALSE	FALSE	GVY4Ce	4552597	0.7154	0.132731	TRUE	reported	textfile	0.0526059	5.23824e-06	TRUE	reported	textfile	8242	TRUE	0.00251106	20.7432	60.7774
	rs36012907	T	C	T	C	0.128382	-0.0430129	0.0917344	0.916957	FALSE	FALSE	FALSE	GVY4Ce	204619938	0.324483	0.0436552	TRUE	reported	textfile	0.0263672	1.1217e-06	TRUE	reported	textfile	8242	TRUE	0.00286814	23.7014	60.7774
	rs62290256	G	A	G	A	0.16173	-0.00202418	0.0584841	0.925977	FALSE	FALSE	FALSE	GVY4Ce	185538454	0.964355	0.0452945	TRUE	reported	textfile	0.0316506	3.22408e-07	TRUE	reported	textfile	8242	TRUE	0.00315799	26.1043	60.7774
	rs662138	G	C	G	C	-0.133922	-0.0284377	0.175323	0.146973	FALSE	TRUE	FALSE	GVY4Ce	160143444	0.394924	0.0334277	TRUE	reported	textfile	0.0196516	9.4375e-12	TRUE	reported	textfile	8242	TRUE	0.00560319	46.4304	60.7774
	rs73001574	T	G	T	G	-0.28157	-0.00892265	0.0158023	0.950102	FALSE	FALSE	FALSE	GVY4Ce	76064320	0.868802	0.0540178	TRUE	reported	textfile	0.0599701	2.66386e-06	TRUE	reported	textfile	8242	TRUE	0.00266754	22.0393	60.7774
	rs7496462	G	C	G	C	0.0678033	0.0189454	0.498842	0.460017	FALSE	TRUE	TRUE	GVY4Ce	68441781	0.421693	0.0235789	TRUE	reported	textfile	0.0149904	6.0939e-06	TRUE	reported	textfile	8242	FALSE	0.00247609	20.4536	60.7774
	rs75586607	C	G	C	G	-0.175199	0.045676	0.0401487	0.0161527	FALSE	TRUE	FALSE	GVY4Ce	113921180	0.618237	0.0916543	TRUE	reported	textfile	0.0387011	5.98379e-06	TRUE	reported	textfile	8242	TRUE	0.00248031	20.4886	60.7774
	rs75690409	G	A	G	A	0.265713	-0.00494704	0.0166198	0.976872	FALSE	FALSE	FALSE	GVY4Ce	9468265	0.949985	0.0788674	TRUE	reported	textfile	0.0585954	5.76827e-06	TRUE	reported	textfile	8242	TRUE	0.00248876	20.5586	60.7774
	rs77010315	A	C	A	C	-0.452358	0.145814	0.012084	0.995627	FALSE	FALSE	FALSE	GVY4Ce	151343594	0.432877	0.185922	TRUE	reported	textfile	0.0682548	3.41446e-11	TRUE	reported	textfile	8242	TRUE	0.00530099	43.913	60.7774
	rs80254170	G	A	G	A	-0.124082	0.055137	0.0750547	0.929477	FALSE	FALSE	FALSE	GVY4Ce	160093251	0.228551	0.045791	TRUE	reported	textfile	0.0280817	9.93375e-06	TRUE	reported	textfile	8242	TRUE	0.00236326	19.5194	60.7774
	rs898847	C	T	C	T	0.0835404	-0.0160949	0.745109	0.184023	FALSE	FALSE	FALSE	GVY4Ce	110193739	0.596278	0.0303815	TRUE	reported	textfile	0.0173534	1.47896e-06	TRUE	reported	textfile	8242	TRUE	0.00280396	23.1696	60.7774
GCST90199669	rs10984356	G	A	G	A	-0.144742	-0.0207971	0.0562768	0.931069	FALSE	FALSE	FALSE	GVY4Ce	118991295	0.662332	0.0476237	TRUE	reported	textfile	0.0326654	9.37703e-06	TRUE	reported	textfile	8262	TRUE	0.00237081	19.6294	29.1138
	rs112845131	T	A	T	A	0.324374	0.099756	0.0127551	0.00340218	FALSE	TRUE	FALSE	GVY4Ce	144385482	0.601976	0.191264	TRUE	reported	textfile	0.0667607	1.18128e-06	TRUE	reported	textfile	8262	TRUE	0.00284922	23.6018	29.1138
	rs114798927	C	T	C	T	-0.112961	-0.0555035	0.109753	0.848875	FALSE	FALSE	FALSE	GVY4Ce	9363866	0.0946281	0.0332063	TRUE	reported	textfile	0.0241021	2.77555e-06	TRUE	reported	textfile	8262	TRUE	0.00265161	21.9605	29.1138
	rs115362213	C	G	C	G	-0.313614	0.185085	0.0124863	0.00667873	FALSE	TRUE	FALSE	GVY4Ce	170171917	0.184888	0.139597	TRUE	reported	textfile	0.0668907	2.75273e-06	TRUE	reported	textfile	8262	TRUE	0.00265351	21.9763	29.1138
	rs1171617	T	G	T	G	0.215613	-0.00390131	0.769509	0.160504	FALSE	FALSE	FALSE	GVY4Ce	59707424	0.902633	0.03189	TRUE	reported	textfile	0.0180295	5.83405e-33	TRUE	reported	textfile	8262	TRUE	0.0170155	142.981	29.1138
	rs117508585	A	G	A	G	-0.264148	-0.307841	0.0165029	0.991159	FALSE	FALSE	FALSE	GVY4Ce	1486664	0.0132075	0.124223	TRUE	reported	textfile	0.0589634	7.46889e-06	TRUE	reported	textfile	8262	TRUE	0.00242321	20.0643	29.1138
	rs138268157	G	A	G	A	0.107567	-0.0560986	0.124725	0.925058	FALSE	FALSE	FALSE	GVY4Ce	57058647	0.20732	0.0444885	TRUE	reported	textfile	0.0225861	1.91198e-06	TRUE	reported	textfile	8262	TRUE	0.00273779	22.6762	29.1138
	rs139264311	G	A	G	A	-0.230906	0.121323	0.0214303	0.971744	FALSE	FALSE	FALSE	GVY4Ce	19751997	0.0835468	0.0701098	TRUE	reported	textfile	0.0521359	9.47e-06	TRUE	reported	textfile	8262	TRUE	0.00236854	19.6106	29.1138
	rs146712130	A	T	A	T	-0.378122	-0.614888	0.00766517	0.000428475	FALSE	TRUE	FALSE	GVY4Ce	61468442	0.298615	0.591575	TRUE	reported	textfile	0.0854937	9.74293e-06	TRUE	reported	textfile	8262	TRUE	0.00236202	19.5565	29.1138
	rs147882444	A	G	A	G	-0.269681	0.0556886	0.0159815	0.986353	FALSE	FALSE	FALSE	GVY4Ce	2924973	0.591882	0.103875	TRUE	reported	textfile	0.060037	7.05834e-06	TRUE	reported	textfile	8262	TRUE	0.00243623	20.1724	29.1138
	rs16865990	G	A	G	A	-0.373578	-0.33786	0.0100037	0.996721	FALSE	FALSE	FALSE	GVY4Ce	224459365	0.105644	0.208802	TRUE	reported	textfile	0.0752289	6.83895e-07	TRUE	reported	textfile	8262	TRUE	0.00297587	24.654	29.1138
	rs1839212	A	G	A	G	0.217408	0.0352356	0.0267879	0.977855	FALSE	FALSE	FALSE	GVY4Ce	14271175	0.658784	0.0797922	TRUE	reported	textfile	0.0465305	2.97752e-06	TRUE	reported	textfile	8262	TRUE	0.00263539	21.8258	29.1138
	rs2631367	G	C	G	C	0.111841	0.0175146	0.522496	0.65529	FALSE	TRUE	TRUE	GVY4Ce	132369766	0.481953	0.0249083	TRUE	reported	textfile	0.0149618	7.71344e-14	TRUE	reported	textfile	8262	FALSE	0.00671772	55.8636	29.1138
	rs273694	C	T	C	T	0.070912	0.00159898	0.561411	0.391147	FALSE	FALSE	FALSE	GVY4Ce	51129448	0.947491	0.0242793	TRUE	reported	textfile	0.0154344	4.33962e-06	TRUE	reported	textfile	8262	TRUE	0.00254839	21.1035	29.1138
	rs55640226	C	T	C	T	-0.129357	-0.0159978	0.0695067	0.952964	FALSE	FALSE	FALSE	GVY4Ce	96602182	0.771378	0.0550556	TRUE	reported	textfile	0.02927	9.8956e-06	TRUE	reported	textfile	8262	TRUE	0.00235843	19.5267	29.1138
	rs55796423	A	G	A	G	-0.0969525	-0.0246423	0.153893	0.86459	FALSE	FALSE	FALSE	GVY4Ce	34313094	0.477668	0.0347046	TRUE	reported	textfile	0.0211135	4.39083e-06	TRUE	reported	textfile	8262	TRUE	0.00254569	21.0811	29.1138
	rs61765007	A	G	A	G	-0.261156	-0.123883	0.0168485	0.994687	FALSE	FALSE	FALSE	GVY4Ce	71569179	0.459437	0.16746	TRUE	reported	textfile	0.0577114	6.03371e-06	TRUE	reported	textfile	8262	TRUE	0.00247239	20.4725	29.1138
	rs662138	G	C	G	C	-0.0872708	-0.0284377	0.174893	0.146973	FALSE	TRUE	FALSE	GVY4Ce	160143444	0.394924	0.0334277	TRUE	reported	textfile	0.0197411	9.83515e-06	TRUE	reported	textfile	8262	TRUE	0.00235985	19.5384	29.1138
	rs71454277	A	C	A	C	0.264081	-0.536051	0.0165103	0.995671	FALSE	FALSE	FALSE	GVY4Ce	70452222	0.00079748	0.15984	TRUE	reported	textfile	0.0592975	8.44882e-06	TRUE	reported	textfile	8262	TRUE	0.00239483	19.8288	29.1138
	rs74823953	T	C	T	C	-0.407734	0.164069	0.0122617	0.995308	FALSE	FALSE	FALSE	GVY4Ce	151300049	0.357857	0.178441	TRUE	reported	textfile	0.0679719	1.99076e-09	TRUE	reported	textfile	8262	TRUE	0.00433633	35.9741	29.1138
	rs79958740	T	A	T	A	0.204757	0.0343821	0.0327749	0.0264698	FALSE	TRUE	FALSE	GVY4Ce	174319298	0.63654	0.0727599	TRUE	reported	textfile	0.042295	1.2908e-06	TRUE	reported	textfile	8262	TRUE	0.00282868	23.4312	29.1138
	rs898847	C	T	C	T	0.0867139	-0.0160949	0.744526	0.184023	FALSE	FALSE	FALSE	GVY4Ce	110193739	0.596278	0.0303815	TRUE	reported	textfile	0.0173494	5.78998e-07	TRUE	reported	textfile	8262	TRUE	0.00301448	24.9749	29.1138
GCST90199670	rs1080669	T	C	T	C	-0.105885	-0.0516477	0.13774	0.874232	FALSE	FALSE	FALSE	GVY4Ce	51063011	0.143054	0.0352661	TRUE	reported	textfile	0.0228046	3.43172e-06	TRUE	reported	textfile	8213	TRUE	0.00261808	21.5535	21.0464
	rs113401873	A	G	A	G	0.249914	0.0446109	0.0189542	0.953549	FALSE	FALSE	FALSE	GVY4Ce	116781555	0.425993	0.056039	TRUE	reported	textfile	0.0558793	7.73518e-06	TRUE	reported	textfile	8213	TRUE	0.00242952	19.9974	21.0464
	rs114028922	C	G	C	G	0.163864	0.00711627	0.0527863	0.129802	FALSE	TRUE	FALSE	GVY4Ce	86556257	0.841851	0.0356659	TRUE	reported	textfile	0.034701	2.3335e-06	TRUE	reported	textfile	8213	TRUE	0.00270772	22.2935	21.0464
	rs114863573	C	G	C	G	0.194631	-0.0419346	0.0344806	0.0547705	FALSE	TRUE	FALSE	GVY4Ce	176551303	0.44154	0.0544892	TRUE	reported	textfile	0.0426242	4.96626e-06	TRUE	reported	textfile	8213	TRUE	0.00253226	20.8452	21.0464
	rs11617909	T	G	T	G	-0.145908	0.050599	0.0654711	0.960487	FALSE	FALSE	FALSE	GVY4Ce	32800725	0.399478	0.0600543	TRUE	reported	textfile	0.0312604	3.04888e-06	TRUE	reported	textfile	8213	TRUE	0.00264556	21.7803	21.0464
	rs117448509	T	G	T	G	0.255763	-0.151374	0.0184259	0.99431	FALSE	FALSE	FALSE	GVY4Ce	105342649	0.319245	0.15198	TRUE	reported	textfile	0.0576024	8.98944e-06	TRUE	reported	textfile	8213	TRUE	0.0023947	19.7101	21.0464
	rs1297208	C	T	C	T	-0.072164	0.021113	0.425451	0.560387	FALSE	FALSE	FALSE	GVY4Ce	14935708	0.374043	0.0237512	TRUE	reported	textfile	0.0161009	7.39509e-06	TRUE	reported	textfile	8213	TRUE	0.00243993	20.0833	21.0464
	rs183008696	T	C	T	C	-0.371462	0.00422176	0.00942819	0.987749	FALSE	FALSE	FALSE	GVY4Ce	110154414	0.969476	0.110329	TRUE	reported	textfile	0.0801958	3.62269e-06	TRUE	reported	textfile	8213	TRUE	0.0026055	21.4496	21.0464
	rs185717944	C	T	C	T	0.292572	0.0504148	0.0134277	0.94006	FALSE	FALSE	FALSE	GVY4Ce	63630484	0.314395	0.050112	TRUE	reported	textfile	0.0661473	9.73254e-06	TRUE	reported	textfile	8213	TRUE	0.00237633	19.5585	21.0464
	rs2094632	G	A	G	A	0.0781469	-0.00926499	0.687099	0.366814	FALSE	FALSE	FALSE	GVY4Ce	90417237	0.70485	0.02446	TRUE	reported	textfile	0.0165713	2.40778e-06	TRUE	reported	textfile	8213	TRUE	0.00270044	22.2333	21.0464
	rs2386992	G	A	G	A	0.0750443	-0.0021834	0.639974	0.330823	FALSE	FALSE	FALSE	GVY4Ce	47966428	0.930429	0.025009	TRUE	reported	textfile	0.0165301	5.62943e-06	TRUE	reported	textfile	8213	TRUE	0.00250319	20.6053	21.0464
	rs2967159	C	T	C	T	-0.0892336	-0.0346665	0.782601	0.164119	FALSE	FALSE	FALSE	GVY4Ce	57777675	0.280343	0.032112	TRUE	reported	textfile	0.0188596	2.229e-06	TRUE	reported	textfile	8213	TRUE	0.00271837	22.3813	21.0464
	rs55746532	C	G	C	G	0.137732	0.0600299	0.0667562	0.071123	FALSE	TRUE	FALSE	GVY4Ce	49843197	0.190543	0.0458602	TRUE	reported	textfile	0.0307764	7.63206e-06	TRUE	reported	textfile	8213	TRUE	0.00243262	20.023	21.0464
	rs6506794	G	A	G	A	0.0767115	-0.00363397	0.709199	0.350015	FALSE	FALSE	FALSE	GVY4Ce	78213176	0.882485	0.0245838	TRUE	reported	textfile	0.017227	8.46853e-06	TRUE	reported	textfile	8213	TRUE	0.00240853	19.8242	21.0464
	rs72704298	G	A	G	A	0.13257	0.0627485	0.0793087	0.892516	FALSE	FALSE	FALSE	GVY4Ce	8146661	0.0969326	0.0378024	TRUE	reported	textfile	0.0283537	2.93147e-06	TRUE	reported	textfile	8213	TRUE	0.0026547	21.8557	21.0464
	rs7626271	G	T	G	T	0.19145	-0.107136	0.0385131	0.97233	FALSE	FALSE	FALSE	GVY4Ce	6732966	0.136791	0.0720077	TRUE	reported	textfile	0.0401333	1.83911e-06	TRUE	reported	textfile	8213	TRUE	0.00276311	22.7507	21.0464
	rs79787801	A	G	A	G	-0.132657	-0.00120707	0.0767671	0.946139	FALSE	FALSE	FALSE	GVY4Ce	13384089	0.981603	0.0523459	TRUE	reported	textfile	0.0290533	4.97162e-06	TRUE	reported	textfile	8213	TRUE	0.00253202	20.8432	21.0464
GCST90199671	rs11244781	T	C	T	C	-0.0897994	-0.0371704	0.212774	0.645436	FALSE	FALSE	FALSE	GVY4Ce	126043660	0.131986	0.0246763	TRUE	reported	textfile	0.0184176	1.08402e-06	TRUE	reported	textfile	8229	TRUE	0.00288059	23.767	21.9028
	rs11641923	A	G	A	G	-0.265368	0.0944687	0.0178239	0.99122	FALSE	FALSE	FALSE	GVY4Ce	4292671	0.454671	0.126354	TRUE	reported	textfile	0.0576737	4.2008e-06	TRUE	reported	textfile	8229	TRUE	0.00256613	21.1659	21.9028
	rs117088632	A	G	A	G	0.266147	-0.0457788	0.018654	0.978271	FALSE	FALSE	FALSE	GVY4Ce	22734962	0.566097	0.0797805	TRUE	reported	textfile	0.0563105	2.2851e-06	TRUE	reported	textfile	8229	TRUE	0.00270732	22.3336	21.9028
	rs117215329	T	C	T	C	0.256704	-0.188438	0.0194204	0.991463	FALSE	FALSE	FALSE	GVY4Ce	49522298	0.146132	0.129659	TRUE	reported	textfile	0.0545011	2.47623e-06	TRUE	reported	textfile	8229	TRUE	0.00268868	22.1794	21.9028
	rs140247774	T	C	T	C	0.132671	-0.00781865	0.0686635	0.938956	FALSE	FALSE	FALSE	GVY4Ce	18015216	0.874378	0.0494539	TRUE	reported	textfile	0.0299172	9.22343e-06	TRUE	reported	textfile	8229	TRUE	0.00238411	19.661	21.9028
	rs140798906	C	T	C	T	0.347447	-0.385047	0.0100012	0.993183	FALSE	FALSE	FALSE	GVY4Ce	92863313	0.0119015	0.153097	TRUE	reported	textfile	0.0757916	4.55625e-06	TRUE	reported	textfile	8229	TRUE	0.0025473	21.0102	21.9028
	rs17028699	T	C	T	C	0.121118	-0.0747317	0.117487	0.897103	FALSE	FALSE	FALSE	GVY4Ce	3211589	0.0544114	0.0388509	TRUE	reported	textfile	0.0238351	3.74526e-07	TRUE	reported	textfile	8229	TRUE	0.00312806	25.8153	21.9028
	rs17417592	G	C	G	C	0.193215	-0.00495843	0.0330634	0.0724313	FALSE	TRUE	FALSE	GVY4Ce	18146568	0.913798	0.0458056	TRUE	reported	textfile	0.0425574	5.62253e-06	TRUE	reported	textfile	8229	TRUE	0.00249861	20.6075	21.9028
	rs62047236	T	A	T	A	-0.136092	-0.149164	0.0650202	0.0191706	FALSE	TRUE	FALSE	GVY4Ce	64040080	0.0763396	0.0841626	TRUE	reported	textfile	0.0307172	9.40171e-06	TRUE	reported	textfile	8229	TRUE	0.00237969	19.6244	21.9028
	rs67512771	T	C	T	C	0.37189	-0.0188139	0.0091838	0.966843	FALSE	FALSE	FALSE	GVY4Ce	11380921	0.780195	0.0674175	TRUE	reported	textfile	0.0780862	1.91153e-06	TRUE	reported	textfile	8229	TRUE	0.00274877	22.6764	21.9028
	rs73391840	G	A	G	A	0.115721	-0.0377821	0.0914345	0.92933	FALSE	FALSE	FALSE	GVY4Ce	54342514	0.407289	0.0455935	TRUE	reported	textfile	0.026184	9.89213e-06	TRUE	reported	textfile	8229	TRUE	0.00236797	19.5275	21.9028
	rs76358805	C	A	C	A	-0.325404	-0.136247	0.0116945	0.99615	FALSE	FALSE	FALSE	GVY4Ce	39096642	0.468503	0.187948	TRUE	reported	textfile	0.0704489	3.85587e-06	TRUE	reported	textfile	8229	TRUE	0.00258598	21.33	21.9028
	rs8024193	C	T	C	T	-0.125484	-0.0194503	0.0810205	0.909425	FALSE	FALSE	FALSE	GVY4Ce	79234797	0.633517	0.0407949	TRUE	reported	textfile	0.0278703	6.71831e-06	TRUE	reported	textfile	8229	TRUE	0.00245741	20.2669	21.9028
	rs9294112	T	C	T	C	-0.0795037	-0.00245164	0.584908	0.496632	FALSE	FALSE	FALSE	GVY4Ce	78464403	0.917646	0.0237105	TRUE	reported	textfile	0.0157707	4.62576e-07	TRUE	reported	textfile	8229	TRUE	0.00307884	25.4078	21.9028
	rs9349017	A	G	A	G	-0.0681227	0.0443928	0.472072	0.557478	FALSE	FALSE	FALSE	GVY4Ce	36843824	0.060548	0.0236537	TRUE	reported	textfile	0.0153172	8.68962e-06	TRUE	reported	textfile	8229	TRUE	0.00239792	19.7751	21.9028
	rs949204	A	C	A	C	-0.176649	0.035467	0.94961	0.043496	FALSE	FALSE	FALSE	GVY4Ce	159438824	0.53491	0.057156	TRUE	reported	textfile	0.0351179	4.90051e-07	TRUE	reported	textfile	8229	TRUE	0.00306538	25.2965	21.9028
GCST90199672	rs112268836	C	T	C	T	0.356864	0.232094	0.0100841	0.997607	FALSE	FALSE	FALSE	GVY4Ce	98839030	0.356154	0.251533	TRUE	reported	textfile	0.0757379	2.45505e-06	TRUE	reported	textfile	8181	TRUE	0.00270642	22.1959	22.5974
	rs113601767	G	A	G	A	-0.172283	-0.0436296	0.0407475	0.980215	FALSE	FALSE	FALSE	GVY4Ce	57109096	0.598894	0.0829473	TRUE	reported	textfile	0.0380449	5.94281e-06	TRUE	reported	textfile	8181	TRUE	0.00250034	20.5015	22.5974
	rs117338371	A	G	A	G	-0.179984	0.0579159	0.0360945	0.968678	FALSE	FALSE	FALSE	GVY4Ce	90979532	0.389894	0.0673591	TRUE	reported	textfile	0.0406824	9.68362e-06	TRUE	reported	textfile	8181	TRUE	0.00238677	19.5681	22.5974
	rs117461873	A	G	A	G	-0.269529	0.0418342	0.0177566	0.978901	FALSE	FALSE	FALSE	GVY4Ce	106362215	0.600409	0.0798647	TRUE	reported	textfile	0.0573321	2.58663e-06	TRUE	reported	textfile	8181	TRUE	0.00269425	22.0958	22.5974
	rs11766962	C	T	C	T	-0.0829003	-0.010963	0.225534	0.847348	FALSE	FALSE	FALSE	GVY4Ce	126853325	0.73861	0.0328532	TRUE	reported	textfile	0.0183671	6.3762e-06	TRUE	reported	textfile	8181	TRUE	0.00248396	20.3669	22.5974
	rs1428090	C	A	C	A	0.0721094	-0.0105793	0.418005	0.672707	FALSE	FALSE	FALSE	GVY4Ce	116034218	0.672647	0.0250387	TRUE	reported	textfile	0.015174	2.01246e-06	TRUE	reported	textfile	8181	TRUE	0.00275283	22.5776	22.5974
	rs1449141	C	A	C	A	-0.0813985	-0.0131543	0.282847	0.65005	FALSE	FALSE	FALSE	GVY4Ce	231519173	0.593535	0.0246464	TRUE	reported	textfile	0.0168357	1.33222e-06	TRUE	reported	textfile	8181	TRUE	0.00284921	23.3703	22.5974
	rs145121944	G	A	G	A	-0.283903	0.0115067	0.016564	0.955814	FALSE	FALSE	FALSE	GVY4Ce	83426346	0.84177	0.0576402	TRUE	reported	textfile	0.059632	1.92708e-06	TRUE	reported	textfile	8181	TRUE	0.00276295	22.6608	22.5974
	rs145856286	A	G	A	G	-0.386166	-0.105132	0.00822591	0.995517	FALSE	FALSE	FALSE	GVY4Ce	30666453	0.558922	0.179884	TRUE	reported	textfile	0.084412	4.76737e-06	TRUE	reported	textfile	8181	TRUE	0.00255167	20.9235	22.5974
	rs149160598	A	G	A	G	-0.305518	0.137666	0.0163097	0.981972	FALSE	FALSE	FALSE	GVY4Ce	101781434	0.117183	0.0878698	TRUE	reported	textfile	0.06029	4.0311e-07	TRUE	reported	textfile	8181	TRUE	0.00312907	25.673	22.5974
	rs1995538	T	G	T	G	0.445516	0.558515	0.993275	0.001006	FALSE	FALSE	FALSE	GVY4Ce	4330081	0.117722	0.357014	TRUE	reported	textfile	0.0952138	2.88123e-06	TRUE	reported	textfile	8181	TRUE	0.00266907	21.8887	22.5974
	rs274865	C	G	C	G	-0.524705	0.0826109	0.00422587	0.0428364	FALSE	TRUE	FALSE	GVY4Ce	48170827	0.162318	0.059121	TRUE	reported	textfile	0.117158	7.51337e-06	TRUE	reported	textfile	8181	TRUE	0.00244578	20.053	22.5974
	rs2809969	C	T	C	T	-0.0696477	0.0244091	0.527785	0.488479	FALSE	FALSE	FALSE	GVY4Ce	199832888	0.301402	0.0236194	TRUE	reported	textfile	0.0152303	4.80833e-06	TRUE	reported	textfile	8181	TRUE	0.00254966	20.9069	22.5974
	rs373578	G	A	G	A	0.0789206	-0.0096931	0.71786	0.26196	FALSE	FALSE	FALSE	GVY4Ce	110571088	0.718992	0.0269397	TRUE	reported	textfile	0.0174154	5.85235e-06	TRUE	reported	textfile	8181	TRUE	0.00250391	20.5309	22.5974
	rs4931397	C	G	C	G	-0.0728101	-0.0166075	0.658574	0.639179	FALSE	TRUE	FALSE	GVY4Ce	27762376	0.500178	0.0246327	TRUE	reported	textfile	0.015977	5.18472e-06	TRUE	reported	textfile	8181	TRUE	0.00253213	20.7628	22.5974
	rs4953634	C	T	C	T	-0.14883	-0.0495314	0.0551434	0.875006	FALSE	FALSE	FALSE	GVY4Ce	48825697	0.167628	0.0358958	TRUE	reported	textfile	0.0330522	6.70402e-06	TRUE	reported	textfile	8181	TRUE	0.00247229	20.2709	22.5974
	rs5760895	C	G	C	G	-0.0832651	-0.0517772	0.73044	0.63048	FALSE	TRUE	FALSE	GVY4Ce	25182992	0.0337878	0.0243934	TRUE	reported	textfile	0.0173935	1.69167e-06	TRUE	reported	textfile	8181	TRUE	0.00279339	22.9111	22.5974
	rs62381198	T	C	T	C	-0.317886	-0.0125579	0.0258779	0.975389	FALSE	FALSE	FALSE	GVY4Ce	138843482	0.869214	0.076267	TRUE	reported	textfile	0.047336	1.87386e-11	TRUE	reported	textfile	8181	TRUE	0.00548234	45.0872	22.5974
	rs647667	C	T	C	T	0.154413	0.0792697	0.0593252	0.954053	FALSE	FALSE	FALSE	GVY4Ce	181416933	0.160218	0.0564463	TRUE	reported	textfile	0.032158	1.57324e-06	TRUE	reported	textfile	8181	TRUE	0.00281035	23.0507	22.5974
	rs71537594	A	T	A	T	0.141263	-0.0124239	0.0668165	0.102679	FALSE	TRUE	FALSE	GVY4Ce	81912854	0.751997	0.0393153	TRUE	reported	textfile	0.0305075	3.64911e-06	TRUE	reported	textfile	8181	TRUE	0.00261397	21.4357	22.5974
	rs72680272	A	G	A	G	-0.375643	-0.161335	0.00830054	0.998213	FALSE	FALSE	FALSE	GVY4Ce	73727760	0.549894	0.269828	TRUE	reported	textfile	0.0834787	6.79963e-06	TRUE	reported	textfile	8181	TRUE	0.00246899	20.2438	22.5974
	rs7478	A	T	A	T	0.0709586	-0.0215447	0.422473	0.374812	FALSE	TRUE	TRUE	GVY4Ce	55487144	0.37864	0.0244714	TRUE	reported	textfile	0.0154749	4.53115e-06	TRUE	reported	textfile	8181	FALSE	0.0025635	21.0207	22.5974
	rs756874	G	A	G	A	0.0765485	0.0251774	0.36637	0.700312	FALSE	FALSE	FALSE	GVY4Ce	91174007	0.326783	0.0256751	TRUE	reported	textfile	0.0157536	1.17904e-06	TRUE	reported	textfile	8181	TRUE	0.00287777	23.6052	22.5974
	rs77008478	G	A	G	A	-0.327811	-0.0861828	0.0114541	0.942695	FALSE	FALSE	FALSE	GVY4Ce	61457539	0.0916474	0.0510933	TRUE	reported	textfile	0.0709191	3.79474e-06	TRUE	reported	textfile	8181	TRUE	0.00260484	21.3606	22.5974
	rs77555311	G	A	G	A	-0.201776	-0.0123132	0.0319735	0.963582	FALSE	FALSE	FALSE	GVY4Ce	162775308	0.843908	0.0625359	TRUE	reported	textfile	0.0431392	2.90649e-06	TRUE	reported	textfile	8181	TRUE	0.00266703	21.872	22.5974
GCST90199673	rs10228292	T	C	T	C	-0.0656196	0.0354717	0.694808	0.280846	FALSE	FALSE	FALSE	GVY4Ce	64520810	0.174989	0.0261524	TRUE	reported	textfile	0.0146309	7.29186e-06	TRUE	reported	textfile	8228	TRUE	0.00243877	20.1103	24.6861
	rs10494157	A	G	A	G	-0.0929436	-0.0273404	0.130411	0.912372	FALSE	FALSE	FALSE	GVY4Ce	113348416	0.512264	0.0417209	TRUE	reported	textfile	0.0200791	3.6767e-06	TRUE	reported	textfile	8228	TRUE	0.00259733	21.4213	24.6861
	rs10806995	G	A	G	A	-0.066028	0.0432898	0.298428	0.587564	FALSE	FALSE	FALSE	GVY4Ce	24845553	0.0704498	0.0239301	TRUE	reported	textfile	0.0147689	7.79437e-06	TRUE	reported	textfile	8228	TRUE	0.00242333	19.9827	24.6861
	rs1111474	T	C	T	C	0.116247	-0.0139379	0.07087	0.932857	FALSE	FALSE	FALSE	GVY4Ce	52762028	0.764695	0.0465651	TRUE	reported	textfile	0.0261944	9.08649e-06	TRUE	reported	textfile	8228	TRUE	0.00238789	19.6898	24.6861
	rs115255559	G	A	G	A	-0.219727	-0.0279278	0.0207872	0.986928	FALSE	FALSE	FALSE	GVY4Ce	104256740	0.784681	0.102216	TRUE	reported	textfile	0.0473768	3.52033e-06	TRUE	reported	textfile	8228	TRUE	0.0026074	21.5045	24.6861
	rs117833456	C	T	C	T	-0.170218	-0.0213542	0.0328131	0.943586	FALSE	FALSE	FALSE	GVY4Ce	243820	0.676686	0.0512103	TRUE	reported	textfile	0.038225	8.46599e-06	TRUE	reported	textfile	8228	TRUE	0.00240423	19.8249	24.6861
	rs12049195	A	G	A	G	-0.0676001	-0.023334	0.530054	0.460642	FALSE	FALSE	FALSE	GVY4Ce	156063096	0.325127	0.023714	TRUE	reported	textfile	0.013428	4.79693e-07	TRUE	reported	textfile	8228	TRUE	0.00307073	25.3377	24.6861
	rs12658172	C	G	C	G	-0.0827423	0.0249324	0.157186	0.153687	FALSE	TRUE	FALSE	GVY4Ce	124869692	0.450949	0.033074	TRUE	reported	textfile	0.0185432	8.11423e-06	TRUE	reported	textfile	8228	TRUE	0.00241403	19.9058	24.6861
	rs141370991	T	C	T	C	-0.239218	0.0818252	0.0202811	0.973461	FALSE	FALSE	FALSE	GVY4Ce	95564733	0.260266	0.0726842	TRUE	reported	textfile	0.047825	5.67554e-07	TRUE	reported	textfile	8228	TRUE	0.00303155	25.0134	24.6861
	rs142295380	G	C	G	C	-0.334977	-0.0816723	0.00832313	0.0196063	FALSE	TRUE	FALSE	GVY4Ce	8572205	0.339415	0.0854919	TRUE	reported	textfile	0.07333	4.92228e-06	TRUE	reported	textfile	8228	TRUE	0.00252972	20.8622	24.6861
	rs144814135	A	G	A	G	-0.240898	0.0591222	0.016918	0.987062	FALSE	FALSE	FALSE	GVY4Ce	49156161	0.569635	0.103981	TRUE	reported	textfile	0.0527017	4.85472e-06	TRUE	reported	textfile	8228	TRUE	0.00253292	20.8887	24.6861
	rs148769396	A	G	A	G	0.233356	0.178734	0.0165486	0.979753	FALSE	FALSE	FALSE	GVY4Ce	63696057	0.0362928	0.0853702	TRUE	reported	textfile	0.0527685	9.76712e-06	TRUE	reported	textfile	8228	TRUE	0.00237117	19.5516	24.6861
	rs148982377	C	T	C	T	-0.423259	0.067344	0.034138	0.913778	FALSE	FALSE	FALSE	GVY4Ce	99477415	0.110327	0.0421763	TRUE	reported	textfile	0.036657	7.69047e-31	TRUE	reported	textfile	8228	TRUE	0.015945	133.289	24.6861
	rs149982314	T	C	T	C	-0.363745	-0.0270941	0.00935551	0.99802	FALSE	FALSE	FALSE	GVY4Ce	128095982	0.91592	0.256635	TRUE	reported	textfile	0.0702108	2.20999e-07	TRUE	reported	textfile	8228	TRUE	0.00325145	26.8337	24.6861
	rs150328525	G	T	G	T	-0.304863	0.0586461	0.0102314	0.976806	FALSE	FALSE	FALSE	GVY4Ce	155492437	0.477946	0.0826457	TRUE	reported	textfile	0.0670882	5.51403e-06	TRUE	reported	textfile	8228	TRUE	0.00250342	20.6448	24.6861
	rs150374297	C	T	C	T	-0.262352	-0.243285	0.0142327	0.993152	FALSE	FALSE	FALSE	GVY4Ce	9285583	0.0843684	0.140963	TRUE	reported	textfile	0.0570627	4.27386e-06	TRUE	reported	textfile	8228	TRUE	0.00256245	21.1329	24.6861
	rs1807334	A	G	A	G	0.0626868	-0.0261159	0.39813	0.643282	FALSE	FALSE	FALSE	GVY4Ce	30631364	0.287921	0.0245752	TRUE	reported	textfile	0.0137327	4.99998e-06	TRUE	reported	textfile	8228	TRUE	0.00252608	20.8322	24.6861
	rs184445849	T	C	T	C	0.251175	-0.0553031	0.0156827	0.987614	FALSE	FALSE	FALSE	GVY4Ce	29980806	0.601304	0.105838	TRUE	reported	textfile	0.0545375	4.11386e-06	TRUE	reported	textfile	8228	TRUE	0.00257128	21.2059	24.6861
	rs191866531	A	G	A	G	0.330692	0.356031	0.00830281	0.987957	FALSE	FALSE	FALSE	GVY4Ce	99965551	0.0037074	0.122683	TRUE	reported	textfile	0.0738705	7.58235e-06	TRUE	reported	textfile	8228	TRUE	0.00242971	20.0355	24.6861
	rs2055157	A	C	A	C	0.0781081	0.0329414	0.194049	0.847338	FALSE	FALSE	FALSE	GVY4Ce	23208068	0.307706	0.032294	TRUE	reported	textfile	0.0170109	4.39749e-06	TRUE	reported	textfile	8228	TRUE	0.00255583	21.0781	24.6861
	rs212100	C	T	C	T	0.0852723	-0.0140438	0.838122	0.150351	FALSE	FALSE	FALSE	GVY4Ce	47873738	0.672348	0.033206	TRUE	reported	textfile	0.0183422	3.33596e-06	TRUE	reported	textfile	8228	TRUE	0.00261987	21.6076	24.6861
	rs28552668	T	C	T	C	-0.118903	-0.0699607	0.0716572	0.932408	FALSE	FALSE	FALSE	GVY4Ce	140286964	0.134727	0.046774	TRUE	reported	textfile	0.0260291	4.92176e-06	TRUE	reported	textfile	8228	TRUE	0.00252972	20.8623	24.6861
	rs529543	G	T	G	T	-0.063488	-0.0301299	0.472088	0.463068	FALSE	FALSE	FALSE	GVY4Ce	90582418	0.20363	0.0237005	TRUE	reported	textfile	0.0135612	2.84683e-06	TRUE	reported	textfile	8228	TRUE	0.00265667	21.912	24.6861
	rs560835392	A	C	A	C	0.205827	-0.0541424	0.0236755	0.987105	FALSE	FALSE	FALSE	GVY4Ce	43655195	0.606157	0.105015	TRUE	reported	textfile	0.0442233	3.25145e-06	TRUE	reported	textfile	8228	TRUE	0.00262583	21.6569	24.6861
	rs6428823	T	C	T	C	-0.0632887	-0.00401263	0.55575	0.354903	FALSE	FALSE	FALSE	GVY4Ce	119408720	0.870244	0.0245649	TRUE	reported	textfile	0.0136504	3.54539e-06	TRUE	reported	textfile	8228	TRUE	0.00260576	21.491	24.6861
	rs659964	C	G	C	G	0.0885708	0.00550878	0.148687	0.153107	FALSE	TRUE	FALSE	GVY4Ce	111692395	0.86521	0.0324532	TRUE	reported	textfile	0.0189306	2.88691e-06	TRUE	reported	textfile	8228	TRUE	0.00265341	21.885	24.6861
	rs6879686	T	G	T	G	-0.0722897	0.0146069	0.226271	0.799674	FALSE	FALSE	FALSE	GVY4Ce	99330721	0.621182	0.0295583	TRUE	reported	textfile	0.0159968	6.21329e-06	TRUE	reported	textfile	8228	TRUE	0.0024758	20.4165	24.6861
	rs698050	T	A	T	A	0.0610578	-0.00180913	0.490868	0.490998	FALSE	TRUE	TRUE	GVY4Ce	98071057	0.938942	0.023618	TRUE	reported	textfile	0.0134287	5.44616e-06	TRUE	reported	textfile	8228	FALSE	0.00250628	20.6685	24.6861
	rs706795	C	T	C	T	0.061449	-0.00836349	0.586905	0.414456	FALSE	FALSE	FALSE	GVY4Ce	49903887	0.72671	0.0239295	TRUE	reported	textfile	0.0137477	7.82999e-06	TRUE	reported	textfile	8228	TRUE	0.00242227	19.974	24.6861
	rs71606471	A	C	A	C	-0.106227	0.0175488	0.102975	0.946594	FALSE	FALSE	FALSE	GVY4Ce	3053182	0.736694	0.0521922	TRUE	reported	textfile	0.0221505	1.62119e-06	TRUE	reported	textfile	8228	TRUE	0.00278738	22.9931	24.6861
	rs7173332	C	G	C	G	-0.0880801	0.0254198	0.159577	0.19445	FALSE	TRUE	FALSE	GVY4Ce	84978503	0.397157	0.0300218	TRUE	reported	textfile	0.0187018	2.48066e-06	TRUE	reported	textfile	8228	TRUE	0.00268859	22.176	24.6861
	rs73172224	A	G	A	G	-0.0937382	0.0383334	0.130576	0.817664	FALSE	FALSE	FALSE	GVY4Ce	50452326	0.204981	0.0302437	TRUE	reported	textfile	0.0200897	3.07145e-06	TRUE	reported	textfile	8228	TRUE	0.00263903	21.7661	24.6861
	rs74041508	C	G	C	G	-0.0784005	-0.0108688	0.180671	0.123388	FALSE	TRUE	FALSE	GVY4Ce	31872220	0.762135	0.0359087	TRUE	reported	textfile	0.0175303	7.73864e-06	TRUE	reported	textfile	8228	TRUE	0.00242499	19.9965	24.6861
	rs75280042	T	A	T	A	-0.18074	-0.0325541	0.027998	0.0251894	FALSE	TRUE	FALSE	GVY4Ce	68372972	0.661857	0.0744347	TRUE	reported	textfile	0.0404238	7.78068e-06	TRUE	reported	textfile	8228	TRUE	0.00242374	19.9861	24.6861
	rs75561083	T	C	T	C	0.242916	0.04892	0.0154268	0.927023	FALSE	FALSE	FALSE	GVY4Ce	18620603	0.277123	0.0450127	TRUE	reported	textfile	0.054521	8.37117e-06	TRUE	reported	textfile	8228	TRUE	0.00240682	19.8463	24.6861
	rs76294479	T	C	T	C	0.158165	-0.034643	0.0689424	0.963309	FALSE	FALSE	FALSE	GVY4Ce	81547979	0.576295	0.0619948	TRUE	reported	textfile	0.0264428	2.21235e-09	TRUE	reported	textfile	8228	TRUE	0.0043294	35.7685	24.6861
	rs76768009	A	G	A	G	-0.157937	-0.0822137	0.0366166	0.991962	FALSE	FALSE	FALSE	GVY4Ce	218069033	0.517846	0.127134	TRUE	reported	textfile	0.0356743	9.54667e-06	TRUE	reported	textfile	8228	TRUE	0.00237645	19.5953	24.6861
	rs7687817	T	C	T	C	-0.106706	0.0382915	0.0931987	0.949756	FALSE	FALSE	FALSE	GVY4Ce	109052965	0.475351	0.0536446	TRUE	reported	textfile	0.0229306	3.26475e-06	TRUE	reported	textfile	8228	TRUE	0.00262489	21.6492	24.6861
	rs76895520	A	G	A	G	-0.209452	-0.0461625	0.0212325	0.990095	FALSE	FALSE	FALSE	GVY4Ce	211502804	0.688472	0.115138	TRUE	reported	textfile	0.0467287	7.38458e-06	TRUE	reported	textfile	8228	TRUE	0.00243584	20.0861	24.6861
	rs784420	G	A	G	A	0.0838184	0.0204801	0.295093	0.710351	FALSE	FALSE	FALSE	GVY4Ce	78691701	0.431841	0.0260545	TRUE	reported	textfile	0.0147829	1.4283e-08	TRUE	reported	textfile	8228	TRUE	0.00389199	32.1406	24.6861
	rs7855576	A	C	A	C	-0.0714674	0.00937309	0.275256	0.730499	FALSE	FALSE	FALSE	GVY4Ce	134737617	0.725127	0.0266572	TRUE	reported	textfile	0.0153476	3.21491e-06	TRUE	reported	textfile	8228	TRUE	0.00262844	21.6785	24.6861
	rs79317397	A	C	A	C	0.244906	0.0351352	0.0168108	0.995448	FALSE	FALSE	FALSE	GVY4Ce	139657929	0.841798	0.176034	TRUE	reported	textfile	0.0523019	2.83319e-06	TRUE	reported	textfile	8228	TRUE	0.00265775	21.9209	24.6861
	rs9420589	T	G	T	G	-0.0649842	-0.00898405	0.426402	0.552466	FALSE	FALSE	FALSE	GVY4Ce	92690476	0.704807	0.0237147	TRUE	reported	textfile	0.0136215	1.83585e-06	TRUE	reported	textfile	8228	TRUE	0.00275849	22.7541	24.6861
	rs955783	T	A	T	A	0.0868089	0.00345915	0.403268	0.366322	FALSE	TRUE	FALSE	GVY4Ce	21724936	0.887334	0.0244154	TRUE	reported	textfile	0.013953	4.9235e-10	TRUE	reported	textfile	8228	TRUE	0.00468232	38.6979	24.6861
	rs9594288	T	C	T	C	-0.166697	-0.0453083	0.032861	0.97543	FALSE	FALSE	FALSE	GVY4Ce	38664751	0.539088	0.0737688	TRUE	reported	textfile	0.0370828	6.94836e-06	TRUE	reported	textfile	8228	TRUE	0.00244991	20.2025	24.6861
GCST90199674	rs116213385	T	A	T	A	-0.262717	0.0822717	0.0192637	0.0136139	FALSE	TRUE	FALSE	GVY4Ce	170030685	0.427529	0.103692	TRUE	reported	textfile	0.0544687	1.41226e-06	TRUE	reported	textfile	8235	TRUE	0.00281704	23.2582	21.0354
	rs117536244	C	G	C	G	-0.163754	-0.021899	0.0446178	0.0160792	FALSE	TRUE	FALSE	GVY4Ce	37392148	0.817847	0.0950828	TRUE	reported	textfile	0.0366023	7.68215e-06	TRUE	reported	textfile	8235	TRUE	0.00242465	20.0107	21.0354
	rs1202578	C	T	C	T	0.0731406	-0.0168373	0.680472	0.417527	FALSE	FALSE	FALSE	GVY4Ce	230863290	0.481863	0.0239401	TRUE	reported	textfile	0.0159922	4.79593e-06	TRUE	reported	textfile	8235	TRUE	0.00253358	20.912	21.0354
	rs1349890	C	T	C	T	-0.0701093	-0.0145548	0.585445	0.473014	FALSE	FALSE	FALSE	GVY4Ce	156385615	0.537664	0.0236145	TRUE	reported	textfile	0.0152337	4.17938e-06	TRUE	reported	textfile	8235	TRUE	0.00256544	21.1756	21.0354
	rs139938935	G	A	G	A	-0.482894	0.16271	0.00577789	0.995533	FALSE	FALSE	FALSE	GVY4Ce	21664649	0.356551	0.176483	TRUE	reported	textfile	0.0991018	1.10077e-06	TRUE	reported	textfile	8235	TRUE	0.00287493	23.7375	21.0354
	rs141436484	G	A	G	A	0.104455	-0.00704397	0.119489	0.92129	FALSE	FALSE	FALSE	GVY4Ce	78081794	0.871036	0.0433897	TRUE	reported	textfile	0.0231002	6.13085e-06	TRUE	reported	textfile	8235	TRUE	0.00247677	20.4419	21.0354
	rs146643611	T	C	T	C	-0.155008	-0.0390845	0.0528314	0.966693	FALSE	FALSE	FALSE	GVY4Ce	52965053	0.562336	0.0674597	TRUE	reported	textfile	0.0342988	6.203e-06	TRUE	reported	textfile	8235	TRUE	0.00247406	20.4195	21.0354
	rs1532133	T	C	T	C	0.0760915	0.0115917	0.596884	0.353176	FALSE	FALSE	FALSE	GVY4Ce	152024132	0.638921	0.0247049	TRUE	reported	textfile	0.015638	1.13986e-06	TRUE	reported	textfile	8235	TRUE	0.00286681	23.6703	21.0354
	rs2026430	C	T	C	T	0.0671379	-0.029004	0.493468	0.420334	FALSE	FALSE	FALSE	GVY4Ce	6514079	0.224665	0.023887	TRUE	reported	textfile	0.0150019	7.63079e-06	TRUE	reported	textfile	8235	TRUE	0.00242619	20.0234	21.0354
	rs62273444	A	G	A	G	-0.14935	0.0747519	0.0560991	0.964897	FALSE	FALSE	FALSE	GVY4Ce	118292161	0.245045	0.0643044	TRUE	reported	textfile	0.0327843	5.22542e-06	TRUE	reported	textfile	8235	TRUE	0.00251375	20.7479	21.0354
	rs62294541	G	A	G	A	-0.113994	-0.0228209	0.100994	0.940781	FALSE	FALSE	FALSE	GVY4Ce	38989621	0.647184	0.0498624	TRUE	reported	textfile	0.0251764	5.96007e-06	TRUE	reported	textfile	8235	TRUE	0.00248332	20.4961	21.0354
	rs710362	G	A	G	A	0.15381	0.113104	0.0488731	0.941254	FALSE	FALSE	FALSE	GVY4Ce	87845250	0.0235402	0.0499454	TRUE	reported	textfile	0.0344818	8.17257e-06	TRUE	reported	textfile	8235	TRUE	0.00241034	19.8922	21.0354
	rs73240592	A	G	A	G	0.174041	-0.0155446	0.0402165	0.966418	FALSE	FALSE	FALSE	GVY4Ce	56746704	0.812083	0.0653851	TRUE	reported	textfile	0.0381644	5.10829e-06	TRUE	reported	textfile	8235	TRUE	0.00251899	20.7913	21.0354
	rs760201	G	C	G	C	-0.0998802	-0.053588	0.864839	0.863813	FALSE	TRUE	FALSE	GVY4Ce	156166713	0.119898	0.0344573	TRUE	reported	textfile	0.0222488	7.14789e-06	TRUE	reported	textfile	8235	TRUE	0.0024413	20.1484	21.0354
	rs78085499	T	C	T	C	-0.211076	0.230383	0.0268595	0.989389	FALSE	FALSE	FALSE	GVY4Ce	175877423	0.0463031	0.115618	TRUE	reported	textfile	0.04588	4.21265e-06	TRUE	reported	textfile	8235	TRUE	0.00256361	21.1605	21.0354
	rs7897119	C	G	C	G	-0.081237	-0.068558	0.217008	0.223279	FALSE	TRUE	FALSE	GVY4Ce	123558658	0.0154469	0.0283096	TRUE	reported	textfile	0.0183753	9.82546e-06	TRUE	reported	textfile	8235	TRUE	0.0023678	19.5404	21.0354
	rs79142871	A	G	A	G	0.26564	0.0179695	0.0181089	0.984942	FALSE	FALSE	FALSE	GVY4Ce	89875384	0.855622	0.0987609	TRUE	reported	textfile	0.0560876	2.17794e-06	TRUE	reported	textfile	8235	TRUE	0.00271649	22.4258	21.0354
	rs79589895	G	A	G	A	-0.186161	0.0238495	0.0345417	0.964788	FALSE	FALSE	FALSE	GVY4Ce	116967560	0.704919	0.0629791	TRUE	reported	textfile	0.0413001	6.55911e-06	TRUE	reported	textfile	8235	TRUE	0.00246117	20.3128	21.0354
	rs79795772	A	G	A	G	-0.174959	-0.0412657	0.0397582	0.954593	FALSE	FALSE	FALSE	GVY4Ce	96753823	0.467227	0.0567618	TRUE	reported	textfile	0.0384746	5.43169e-06	TRUE	reported	textfile	8235	TRUE	0.00250479	20.6737	21.0354
	rs989915	T	C	T	C	0.0725937	0.043351	0.355787	0.581912	FALSE	FALSE	FALSE	GVY4Ce	98678172	0.07001	0.0239264	TRUE	reported	textfile	0.0158887	4.90291e-06	TRUE	reported	textfile	8235	TRUE	0.00252847	20.8697	21.0354
GCST90199675	rs1047891	A	C	A	C	-0.267116	-0.00755477	0.30892	0.677969	FALSE	FALSE	FALSE	GVY4Ce	210675783	0.765445	0.0253228	TRUE	reported	textfile	0.0153908	1.78869e-67	TRUE	reported	textfile	8265	TRUE	0.0351632	301.143	48.9332
	rs114917035	C	T	C	T	0.256701	0.098153	0.0158173	0.997637	FALSE	FALSE	FALSE	GVY4Ce	132615774	0.693367	0.248936	TRUE	reported	textfile	0.0579099	9.30326e-06	TRUE	reported	textfile	8265	TRUE	0.00237179	19.6447	48.9332
	rs116979298	T	C	T	C	-0.181869	-0.0345636	0.0342134	0.973765	FALSE	FALSE	FALSE	GVY4Ce	65944802	0.637958	0.0734529	TRUE	reported	textfile	0.0396223	4.43094e-06	TRUE	reported	textfile	8265	TRUE	0.00254267	21.0636	48.9332
	rs117313139	G	C	G	C	0.134168	0.0215109	0.0676518	0.0722198	FALSE	TRUE	FALSE	GVY4Ce	2940349	0.64028	0.0460316	TRUE	reported	textfile	0.0291427	4.14837e-06	TRUE	reported	textfile	8265	TRUE	0.0025579	21.1901	48.9332
	rs12306007	T	C	T	C	0.102709	0.0572303	0.142736	0.856256	FALSE	FALSE	FALSE	GVY4Ce	46790259	0.0892237	0.0336747	TRUE	reported	textfile	0.0203538	4.50717e-07	TRUE	reported	textfile	8265	TRUE	0.00307148	25.4578	48.9332
	rs13135092	G	A	G	A	0.152931	0.0910895	0.0821459	0.982264	FALSE	FALSE	FALSE	GVY4Ce	102276925	0.299164	0.0877357	TRUE	reported	textfile	0.0264972	7.85199e-09	TRUE	reported	textfile	8265	TRUE	0.00401422	33.3032	48.9332
	rs144260607	T	C	T	C	-0.22454	0.00563939	0.0232219	0.968104	FALSE	FALSE	FALSE	GVY4Ce	130768274	0.933876	0.0679691	TRUE	reported	textfile	0.0480399	2.95348e-06	TRUE	reported	textfile	8265	TRUE	0.00263629	21.8413	48.9332
	rs145421014	A	C	A	C	-0.365808	-0.19724	0.00976823	0.991349	FALSE	FALSE	FALSE	GVY4Ce	87911551	0.128535	0.129771	TRUE	reported	textfile	0.0735614	6.59824e-07	TRUE	reported	textfile	8265	TRUE	0.00298309	24.723	48.9332
	rs146683630	C	G	C	G	0.221959	0.0303289	0.0313998	0.0179972	FALSE	TRUE	FALSE	GVY4Ce	98743205	0.736595	0.0901665	TRUE	reported	textfile	0.0415351	9.09753e-08	TRUE	reported	textfile	8265	TRUE	0.00344329	28.5502	48.9332
	rs1805120	A	G	A	G	0.080005	0.0405156	0.208831	0.707142	FALSE	FALSE	FALSE	GVY4Ce	150952443	0.118292	0.0259386	TRUE	reported	textfile	0.017912	7.9486e-06	TRUE	reported	textfile	8265	TRUE	0.002408	19.9453	48.9332
	rs182871603	A	T	A	T	-0.318919	-0.0781545	0.0116236	0.0330424	FALSE	TRUE	FALSE	GVY4Ce	223453245	0.235928	0.0659406	TRUE	reported	textfile	0.0667807	1.79152e-06	TRUE	reported	textfile	8265	TRUE	0.00275182	22.801	48.9332
	rs2282841	T	C	T	C	-0.111787	-0.0537209	0.0908258	0.883938	FALSE	FALSE	FALSE	GVY4Ce	16423181	0.139141	0.0363225	TRUE	reported	textfile	0.0248422	6.7991e-06	TRUE	reported	textfile	8265	TRUE	0.00244398	20.244	48.9332
	rs2781666	T	G	T	G	0.0781012	-0.0137268	0.306099	0.660039	FALSE	FALSE	FALSE	GVY4Ce	131572419	0.580414	0.0248322	TRUE	reported	textfile	0.0156659	6.18211e-07	TRUE	reported	textfile	8265	TRUE	0.00299818	24.8485	48.9332
	rs3095953	C	G	C	G	0.193999	0.0830366	0.0296862	0.0509506	FALSE	TRUE	FALSE	GVY4Ce	165167810	0.12164	0.0536437	TRUE	reported	textfile	0.0422424	4.37914e-06	TRUE	reported	textfile	8265	TRUE	0.00254538	21.0861	48.9332
	rs34544263	G	A	G	A	0.0949334	0.0589417	0.156	0.887015	FALSE	FALSE	FALSE	GVY4Ce	32569015	0.113384	0.0372303	TRUE	reported	textfile	0.0196998	1.44274e-06	TRUE	reported	textfile	8265	TRUE	0.0028019	23.2172	48.9332
	rs35770448	C	T	C	T	0.107377	-0.0609833	0.0983936	0.890354	FALSE	FALSE	FALSE	GVY4Ce	90246328	0.103426	0.0374483	TRUE	reported	textfile	0.0239115	7.1021e-06	TRUE	reported	textfile	8265	TRUE	0.00243393	20.1606	48.9332
	rs37370	T	C	T	C	-0.148341	0.00270145	0.901746	0.10322	FALSE	FALSE	FALSE	GVY4Ce	35039381	0.944171	0.0385766	TRUE	reported	textfile	0.0241157	7.68912e-10	TRUE	reported	textfile	8265	TRUE	0.00455718	37.8284	48.9332
	rs4978869	T	G	T	G	0.103357	-0.0129346	0.114664	0.876347	FALSE	FALSE	FALSE	GVY4Ce	110101283	0.723093	0.0365044	TRUE	reported	textfile	0.0233778	9.81663e-06	TRUE	reported	textfile	8265	TRUE	0.00235941	19.5419	48.9332
	rs56162443	T	C	T	C	0.224743	0.131237	0.0207348	0.994372	FALSE	FALSE	FALSE	GVY4Ce	197019188	0.402634	0.156809	TRUE	reported	textfile	0.0501508	7.41753e-06	TRUE	reported	textfile	8265	TRUE	0.00242393	20.0776	48.9332
	rs62356073	A	G	A	G	-0.0640151	-0.0138284	0.572483	0.461943	FALSE	FALSE	FALSE	GVY4Ce	36241820	0.55804	0.0236078	TRUE	reported	textfile	0.0144212	9.03957e-06	TRUE	reported	textfile	8265	TRUE	0.0023784	19.6996	48.9332
	rs6465696	T	A	T	A	-0.0725476	0.0373466	0.715181	0.736709	FALSE	TRUE	FALSE	GVY4Ce	98675533	0.161724	0.0266896	TRUE	reported	textfile	0.0159349	5.29458e-06	TRUE	reported	textfile	8265	TRUE	0.00250159	20.7225	48.9332
	rs6473159	G	A	G	A	-0.0704143	0.0455497	0.309664	0.822548	FALSE	FALSE	FALSE	GVY4Ce	79462003	0.141372	0.0309714	TRUE	reported	textfile	0.0159401	9.98805e-06	TRUE	reported	textfile	8265	TRUE	0.00235544	19.509	48.9332
	rs72623915	T	C	T	C	0.355872	0.0130952	0.256124	0.687767	FALSE	FALSE	FALSE	GVY4Ce	45355235	0.606214	0.0254035	TRUE	reported	textfile	0.0159872	9.06726e-110	TRUE	reported	textfile	8265	TRUE	0.0565606	495.379	48.9332
	rs72629024	G	C	G	C	0.117324	-0.0798176	0.144402	0.178322	FALSE	TRUE	FALSE	GVY4Ce	63521166	0.0102285	0.0310816	TRUE	reported	textfile	0.0206359	1.30499e-08	TRUE	reported	textfile	8265	TRUE	0.00389573	32.3163	48.9332
	rs72682642	A	G	A	G	0.270338	-0.0149892	0.0141767	0.989957	FALSE	FALSE	FALSE	GVY4Ce	121989928	0.895522	0.114142	TRUE	reported	textfile	0.0607798	8.67438e-06	TRUE	reported	textfile	8265	TRUE	0.00238789	19.7784	48.9332
	rs75686987	A	G	A	G	0.222727	-0.0324826	0.0231924	0.989514	FALSE	FALSE	FALSE	GVY4Ce	77819845	0.777419	0.114908	TRUE	reported	textfile	0.0475935	2.87192e-06	TRUE	reported	textfile	8265	TRUE	0.00264276	21.895	48.9332
	rs76205147	A	G	A	G	0.157438	-0.00473405	0.0473369	0.964898	FALSE	FALSE	FALSE	GVY4Ce	54065347	0.94036	0.0632743	TRUE	reported	textfile	0.0338988	3.4115e-06	TRUE	reported	textfile	8265	TRUE	0.00260301	21.5648	48.9332
	rs77433867	A	G	A	G	-0.161837	-0.0493819	0.041419	0.979533	FALSE	FALSE	FALSE	GVY4Ce	21504329	0.549917	0.0825943	TRUE	reported	textfile	0.0362499	8.0266e-06	TRUE	reported	textfile	8265	TRUE	0.00240576	19.9268	48.9332
	rs7818335	T	C	T	C	0.070804	0.025886	0.374752	0.705662	FALSE	FALSE	FALSE	GVY4Ce	41146640	0.318113	0.025929	TRUE	reported	textfile	0.0152316	3.34365e-06	TRUE	reported	textfile	8265	TRUE	0.00260764	21.6033	48.9332
GCST90199676	rs1002762	G	A	G	A	-0.0958491	-0.0323036	0.199319	0.851005	FALSE	FALSE	FALSE	GVY4Ce	60005830	0.325856	0.0328792	TRUE	reported	textfile	0.0195747	9.75154e-07	TRUE	reported	textfile	8225	TRUE	0.0029066	23.9707	23.3948
	rs10484587	T	A	T	A	0.0879266	-0.00788356	0.225289	0.155191	FALSE	TRUE	FALSE	GVY4Ce	142820440	0.80945	0.0326935	TRUE	reported	textfile	0.0185495	2.13594e-06	TRUE	reported	textfile	8225	TRUE	0.0027243	22.4631	23.3948
	rs10840108	C	T	C	T	-0.0836033	0.0382083	0.247676	0.758491	FALSE	FALSE	FALSE	GVY4Ce	8682394	0.165664	0.0275619	TRUE	reported	textfile	0.0178556	2.83835e-06	TRUE	reported	textfile	8225	TRUE	0.00265831	21.9176	23.3948
	rs111879519	T	C	T	C	0.145409	0.0196471	0.0645021	0.953271	FALSE	FALSE	FALSE	GVY4Ce	233028533	0.728687	0.0566409	TRUE	reported	textfile	0.0319907	5.48463e-06	TRUE	reported	textfile	8225	TRUE	0.00250559	20.6552	23.3948
	rs112871012	A	G	A	G	0.158987	0.000690256	0.090405	0.951199	FALSE	FALSE	FALSE	GVY4Ce	44928640	0.98986	0.0543133	TRUE	reported	textfile	0.0280316	1.41377e-08	TRUE	reported	textfile	8225	TRUE	0.0038958	32.1604	23.3948
	rs114881696	G	C	G	C	-0.236439	0.175002	0.0340631	0.0406348	FALSE	TRUE	FALSE	GVY4Ce	92980470	0.00185836	0.0562348	TRUE	reported	textfile	0.0431018	4.12084e-08	TRUE	reported	textfile	8225	TRUE	0.00364523	30.0844	23.3948
	rs114951684	G	A	G	A	-0.210068	0.142973	0.0284632	0.994536	FALSE	FALSE	FALSE	GVY4Ce	177280337	0.356093	0.154928	TRUE	reported	textfile	0.0464803	6.19855e-06	TRUE	reported	textfile	8225	TRUE	0.00247724	20.421	23.3948
	rs117245363	A	G	A	G	0.292341	-0.00418469	0.015133	0.96161	FALSE	FALSE	FALSE	GVY4Ce	34772147	0.945382	0.0610836	TRUE	reported	textfile	0.063964	4.86807e-06	TRUE	reported	textfile	8225	TRUE	0.00253321	20.8835	23.3948
	rs11754776	T	C	T	C	-0.166115	0.0543768	0.0511945	0.971879	FALSE	FALSE	FALSE	GVY4Ce	166982299	0.44697	0.0715036	TRUE	reported	textfile	0.0349798	2.04541e-06	TRUE	reported	textfile	8225	TRUE	0.00273437	22.5464	23.3948
	rs13238458	A	G	A	G	0.132235	0.029899	0.0702811	0.927022	FALSE	FALSE	FALSE	GVY4Ce	87881104	0.5109	0.0454782	TRUE	reported	textfile	0.0299019	9.76565e-06	TRUE	reported	textfile	8225	TRUE	0.00237207	19.5519	23.3948
	rs139236053	A	G	A	G	-0.153174	-0.119735	0.0546626	0.95643	FALSE	FALSE	FALSE	GVY4Ce	124540052	0.0363597	0.0572105	TRUE	reported	textfile	0.0343176	8.06581e-06	TRUE	reported	textfile	8225	TRUE	0.00241629	19.9173	23.3948
	rs145557517	A	G	A	G	0.307537	-0.099307	0.0140078	0.992574	FALSE	FALSE	FALSE	GVY4Ce	33489150	0.463634	0.135503	TRUE	reported	textfile	0.0656048	2.76271e-06	TRUE	reported	textfile	8225	TRUE	0.00266458	21.9694	23.3948
	rs146172549	C	T	C	T	0.336766	0.136388	0.0112401	0.996821	FALSE	FALSE	FALSE	GVY4Ce	99971059	0.508628	0.206343	TRUE	reported	textfile	0.073153	4.15278e-06	TRUE	reported	textfile	8225	TRUE	0.00257003	21.1878	23.3948
	rs148125219	A	G	A	G	-0.355434	-0.249742	0.0102128	0.997749	FALSE	FALSE	FALSE	GVY4Ce	77128744	0.326907	0.254745	TRUE	reported	textfile	0.0766211	3.50346e-06	TRUE	reported	textfile	8225	TRUE	0.00260946	21.5137	23.3948
	rs158835	G	C	G	C	-0.0823376	-0.0128495	0.711772	0.624548	FALSE	TRUE	FALSE	GVY4Ce	163642228	0.599111	0.0244436	TRUE	reported	textfile	0.0177145	3.351e-06	TRUE	reported	textfile	8225	TRUE	0.00261977	21.599	23.3948
	rs17268364	A	G	A	G	0.0723971	-0.0156406	0.48861	0.634286	FALSE	FALSE	FALSE	GVY4Ce	203913095	0.520536	0.0243426	TRUE	reported	textfile	0.0154591	2.82508e-06	TRUE	reported	textfile	8225	TRUE	0.00265939	21.9264	23.3948
	rs186740048	A	G	A	G	-0.302981	0.0201633	0.0131675	0.977944	FALSE	FALSE	FALSE	GVY4Ce	49868661	0.801151	0.0800581	TRUE	reported	textfile	0.0677624	7.77696e-06	TRUE	reported	textfile	8225	TRUE	0.00242473	19.987	23.3948
	rs191591925	T	C	T	C	-0.439326	0.0331104	0.00658296	0.967105	FALSE	FALSE	FALSE	GVY4Ce	75925202	0.612295	0.0653324	TRUE	reported	textfile	0.0960845	4.82431e-06	TRUE	reported	textfile	8225	TRUE	0.0025353	20.9007	23.3948
	rs2514155	A	C	A	C	-0.156688	0.00998931	0.0501707	0.821128	FALSE	FALSE	FALSE	GVY4Ce	84000834	0.748397	0.0311433	TRUE	reported	textfile	0.0353748	9.45092e-06	TRUE	reported	textfile	8225	TRUE	0.00237965	19.6145	23.3948
	rs4962425	C	T	C	T	0.09298	-0.0132751	0.816855	0.19072	FALSE	FALSE	FALSE	GVY4Ce	125131154	0.658311	0.0300173	TRUE	reported	textfile	0.0206509	6.71679e-06	TRUE	reported	textfile	8225	TRUE	0.00245865	20.2673	23.3948
	rs57601959	A	G	A	G	-0.1601	-0.0230021	0.0479494	0.952902	FALSE	FALSE	FALSE	GVY4Ce	157170888	0.673578	0.0546055	TRUE	reported	textfile	0.0361169	9.30054e-06	TRUE	reported	textfile	8225	TRUE	0.00238336	19.6452	23.3948
	rs57994859	T	C	T	C	-0.132592	-0.0151136	0.0712719	0.920082	FALSE	FALSE	FALSE	GVY4Ce	107881849	0.727041	0.0432975	TRUE	reported	textfile	0.0299211	9.36269e-06	TRUE	reported	textfile	8225	TRUE	0.00238181	19.6324	23.3948
	rs6936055	T	C	T	C	0.0987167	0.0338423	0.198453	0.768464	FALSE	FALSE	FALSE	GVY4Ce	89974636	0.233975	0.0284346	TRUE	reported	textfile	0.0197112	5.49579e-07	TRUE	reported	textfile	8225	TRUE	0.00304016	25.0755	23.3948
	rs72676439	T	C	T	C	-0.132926	-0.0180703	0.0720927	0.904275	FALSE	FALSE	FALSE	GVY4Ce	20604272	0.656509	0.0406315	TRUE	reported	textfile	0.0300848	9.9444e-06	TRUE	reported	textfile	8225	TRUE	0.00236788	19.5173	23.3948
	rs72691394	A	G	A	G	-0.179559	-0.123179	0.0434942	0.962462	FALSE	FALSE	FALSE	GVY4Ce	160206480	0.0526126	0.0635572	TRUE	reported	textfile	0.0377023	1.91162e-06	TRUE	reported	textfile	8225	TRUE	0.00275009	22.6763	23.3948
	rs72785421	C	T	C	T	-0.119237	-0.00636805	0.151933	0.81042	FALSE	FALSE	FALSE	GVY4Ce	14193978	0.831956	0.0300105	TRUE	reported	textfile	0.0216956	3.88734e-08	TRUE	reported	textfile	8225	TRUE	0.0036589	30.1976	23.3948
	rs73808455	T	C	T	C	-0.284414	0.00715467	0.0155412	0.996524	FALSE	FALSE	FALSE	GVY4Ce	39517767	0.970378	0.192671	TRUE	reported	textfile	0.0626028	5.54179e-06	TRUE	reported	textfile	8225	TRUE	0.00250317	20.6352	23.3948
	rs74732810	G	T	G	T	0.158428	0.0468786	0.0560059	0.944094	FALSE	FALSE	FALSE	GVY4Ce	87945357	0.361802	0.0514055	TRUE	reported	textfile	0.0340249	3.22032e-06	TRUE	reported	textfile	8225	TRUE	0.002629	21.6753	23.3948
	rs76911913	G	C	G	C	-0.487266	0.118893	0.00531006	0.0181395	FALSE	TRUE	FALSE	GVY4Ce	71142820	0.190976	0.090918	TRUE	reported	textfile	0.105694	4.02335e-06	TRUE	reported	textfile	8225	TRUE	0.00257736	21.2484	23.3948
	rs7860081	C	G	C	G	0.0735683	0.0244922	0.600899	0.572114	FALSE	TRUE	TRUE	GVY4Ce	113154387	0.306646	0.0239583	TRUE	reported	textfile	0.0159584	4.0268e-06	TRUE	reported	textfile	8225	FALSE	0.00257719	21.247	23.3948
	rs964184	C	G	C	G	-0.177523	-0.132108	0.868688	0.855516	FALSE	TRUE	FALSE	GVY4Ce	116778201	4.59547e-05	0.0324169	TRUE	reported	textfile	0.0228868	8.72352e-15	TRUE	reported	textfile	8225	TRUE	0.00726169	60.1497	23.3948
GCST90199677	rs111838413	C	A	C	A	0.177437	0.110501	0.0397048	0.973168	FALSE	FALSE	FALSE	GVY4Ce	18040522	0.132281	0.0734146	TRUE	reported	textfile	0.0395399	7.20534e-06	TRUE	reported	textfile	8254	TRUE	0.00243385	20.1332	23.7029
	rs1129043	C	T	C	T	-0.131118	-0.00693323	0.576689	0.417482	FALSE	FALSE	FALSE	GVY4Ce	88261979	0.773749	0.0241178	TRUE	reported	textfile	0.0157904	1.0096e-16	TRUE	reported	textfile	8254	TRUE	0.0082844	68.9339	23.7029
	rs117675121	C	A	C	A	-0.227121	0.0155065	0.0253311	0.970306	FALSE	FALSE	FALSE	GVY4Ce	65921438	0.820312	0.0682675	TRUE	reported	textfile	0.0489585	3.5002e-06	TRUE	reported	textfile	8254	TRUE	0.00260054	21.5156	23.7029
	rs12894999	A	G	A	G	-0.0982367	0.0256209	0.813368	0.207566	FALSE	FALSE	FALSE	GVY4Ce	102071272	0.381307	0.0292646	TRUE	reported	textfile	0.0197435	6.50281e-07	TRUE	reported	textfile	8254	TRUE	0.00299043	24.7511	23.7029
	rs13270448	G	A	G	A	0.0763145	0.0032743	0.544031	0.372274	FALSE	FALSE	FALSE	GVY4Ce	49088657	0.89294	0.0243288	TRUE	reported	textfile	0.0154491	7.82209e-07	TRUE	reported	textfile	8254	TRUE	0.00294755	24.3951	23.7029
	rs138447973	C	T	C	T	0.225893	-0.011856	0.0249754	0.951882	FALSE	FALSE	FALSE	GVY4Ce	6288440	0.830714	0.0554574	TRUE	reported	textfile	0.0498426	5.83912e-06	TRUE	reported	textfile	8254	TRUE	0.00248233	20.5352	23.7029
	rs139282082	G	T	G	T	-0.212207	0.030572	0.026625	0.980807	FALSE	FALSE	FALSE	GVY4Ce	109383655	0.727614	0.0877745	TRUE	reported	textfile	0.0476843	8.57655e-06	TRUE	reported	textfile	8254	TRUE	0.00239366	19.7999	23.7029
	rs141436484	G	A	G	A	0.119976	-0.00704397	0.119625	0.92129	FALSE	FALSE	FALSE	GVY4Ce	78081794	0.871036	0.0433897	TRUE	reported	textfile	0.0236236	3.8016e-07	TRUE	reported	textfile	8254	TRUE	0.00311514	25.7864	23.7029
	rs143866653	C	A	C	A	-0.233425	0.090907	0.0236865	0.953453	FALSE	FALSE	FALSE	GVY4Ce	39517901	0.104332	0.0559702	TRUE	reported	textfile	0.0502906	3.45833e-06	TRUE	reported	textfile	8254	TRUE	0.0026033	21.5385	23.7029
	rs146964322	G	C	G	C	0.148688	-0.0701797	0.064898	0.0828722	FALSE	TRUE	FALSE	GVY4Ce	131051546	0.0975911	0.0423625	TRUE	reported	textfile	0.0310762	1.7131e-06	TRUE	reported	textfile	8254	TRUE	0.00276585	22.8871	23.7029
	rs16922127	T	G	T	G	-0.1432	-0.0361142	0.0645772	0.923694	FALSE	FALSE	FALSE	GVY4Ce	4823425	0.416187	0.0444179	TRUE	reported	textfile	0.0311068	4.15425e-06	TRUE	reported	textfile	8254	TRUE	0.00256093	21.187	23.7029
	rs201357853	T	A	T	A	0.121602	-0.035025	0.0884499	0.0957441	FALSE	TRUE	FALSE	GVY4Ce	163888112	0.376363	0.0395934	TRUE	reported	textfile	0.0269646	6.49219e-06	TRUE	reported	textfile	8254	TRUE	0.00245788	20.3324	23.7029
	rs34402912	C	T	C	T	0.124264	-0.017901	0.0826055	0.952315	FALSE	FALSE	FALSE	GVY4Ce	59107201	0.748142	0.0557506	TRUE	reported	textfile	0.0280235	9.23719e-06	TRUE	reported	textfile	8254	TRUE	0.00237656	19.6581	23.7029
	rs45591543	T	C	T	C	0.270085	-0.180158	0.0164948	0.993768	FALSE	FALSE	FALSE	GVY4Ce	89576997	0.217668	0.146143	TRUE	reported	textfile	0.0595489	5.74603e-06	TRUE	reported	textfile	8254	TRUE	0.00248604	20.5659	23.7029
	rs6437111	T	C	T	C	-0.0730313	-0.0326684	0.623194	0.419385	FALSE	FALSE	FALSE	GVY4Ce	149856643	0.175727	0.0241268	TRUE	reported	textfile	0.0157383	3.47833e-06	TRUE	reported	textfile	8254	TRUE	0.00260199	21.5277	23.7029
	rs71434672	T	A	T	A	-0.151261	0.030148	0.059628	0.10171	FALSE	TRUE	FALSE	GVY4Ce	189947754	0.439413	0.038992	TRUE	reported	textfile	0.0321585	2.55614e-06	TRUE	reported	textfile	8254	TRUE	0.00267322	22.1186	23.7029
	rs76701293	A	G	A	G	-0.155826	0.0192552	0.0504492	0.91749	FALSE	FALSE	FALSE	GVY4Ce	56470746	0.653719	0.0429229	TRUE	reported	textfile	0.0352527	9.85775e-06	TRUE	reported	textfile	8254	TRUE	0.00236159	19.5339	23.7029
	rs77095091	C	T	C	T	-0.127049	-0.0136779	0.0767112	0.949697	FALSE	FALSE	FALSE	GVY4Ce	22393127	0.798659	0.0536212	TRUE	reported	textfile	0.0286851	9.4633e-06	TRUE	reported	textfile	8254	TRUE	0.00237102	19.6121	23.7029
	rs77182631	A	G	A	G	-0.175305	0.045012	0.0446725	0.972182	FALSE	FALSE	FALSE	GVY4Ce	36290919	0.527288	0.0712044	TRUE	reported	textfile	0.0370791	2.26898e-06	TRUE	reported	textfile	8254	TRUE	0.00270079	22.3473	23.7029
	rs77723081	C	G	C	G	-0.423631	0.16632	0.00654995	0.0258659	FALSE	TRUE	FALSE	GVY4Ce	17644260	0.0293069	0.076317	TRUE	reported	textfile	0.0948615	7.97744e-06	TRUE	reported	textfile	8254	TRUE	0.00241037	19.9384	23.7029
	rs80195374	A	G	A	G	0.250371	0.142638	0.0222903	0.975672	FALSE	FALSE	FALSE	GVY4Ce	10954589	0.0685946	0.0783263	TRUE	reported	textfile	0.0520121	1.48156e-06	TRUE	reported	textfile	8254	TRUE	0.00279948	23.1662	23.7029
	rs9963006	A	G	A	G	-0.0758529	-0.0233877	0.626775	0.32411	FALSE	FALSE	FALSE	GVY4Ce	59936651	0.353553	0.0252098	TRUE	reported	textfile	0.016472	4.1253e-06	TRUE	reported	textfile	8254	TRUE	0.00256255	21.2005	23.7029
GCST90199678	rs114537403	T	C	T	C	0.252179	0.0880825	0.0185901	0.97889	FALSE	FALSE	FALSE	GVY4Ce	36795468	0.27911	0.0813829	TRUE	reported	textfile	0.0567582	8.86976e-06	TRUE	reported	textfile	8125	TRUE	0.00242373	19.7358	22.6912
	rs11691183	T	C	T	C	-0.0838852	-0.00430405	0.253095	0.673199	FALSE	FALSE	FALSE	GVY4Ce	231569787	0.864059	0.025139	TRUE	reported	textfile	0.0178203	2.51039e-06	TRUE	reported	textfile	8125	TRUE	0.00271978	22.1531	22.6912
	rs117550283	C	G	C	G	-0.120043	0.0763228	0.0880211	0.0292043	FALSE	TRUE	FALSE	GVY4Ce	6878320	0.261753	0.0680083	TRUE	reported	textfile	0.0270924	9.38467e-06	TRUE	reported	textfile	8125	TRUE	0.0024105	19.6278	22.6912
	rs11766962	C	T	C	T	-0.0905032	-0.010963	0.225766	0.847348	FALSE	FALSE	FALSE	GVY4Ce	126853325	0.73861	0.0328532	TRUE	reported	textfile	0.0185917	1.1277e-06	TRUE	reported	textfile	8125	TRUE	0.00290805	23.691	22.6912
	rs140591764	T	C	T	C	-0.477597	-0.0827489	0.00599357	0.981924	FALSE	FALSE	FALSE	GVY4Ce	58043724	0.354507	0.089373	TRUE	reported	textfile	0.0988554	1.35664e-06	TRUE	reported	textfile	8125	TRUE	0.00286453	23.3354	22.6912
	rs145469088	G	A	G	A	-1.63094	0.142897	0.000563557	0.987857	FALSE	FALSE	FALSE	GVY4Ce	34025958	0.188604	0.10869	TRUE	reported	textfile	0.326085	5.68616e-07	TRUE	reported	textfile	8125	TRUE	0.00306942	25.0096	22.6912
	rs151096450	T	G	T	G	-0.106532	-0.0445865	0.116202	0.93193	FALSE	FALSE	FALSE	GVY4Ce	196882123	0.340884	0.0468139	TRUE	reported	textfile	0.0237717	7.41373e-06	TRUE	reported	textfile	8125	TRUE	0.00246572	20.0786	22.6912
	rs17688758	C	T	C	T	-0.128898	-0.000739541	0.0813925	0.939727	FALSE	FALSE	FALSE	GVY4Ce	71131542	0.98797	0.049049	TRUE	reported	textfile	0.0278843	3.78961e-06	TRUE	reported	textfile	8125	TRUE	0.00262306	21.3632	22.6912
	rs191302291	T	G	T	G	-0.303875	-0.0153799	0.015546	0.988752	FALSE	FALSE	FALSE	GVY4Ce	54795883	0.890393	0.111605	TRUE	reported	textfile	0.061572	8.00349e-07	TRUE	reported	textfile	8125	TRUE	0.00298882	24.351	22.6912
	rs191390190	A	T	A	T	-0.27604	0.0626025	0.0157699	0.0592347	FALSE	TRUE	FALSE	GVY4Ce	16909507	0.22258	0.0513262	TRUE	reported	textfile	0.0614913	7.15281e-06	TRUE	reported	textfile	8125	TRUE	0.0024741	20.147	22.6912
	rs276286	A	G	A	G	-0.0849521	-0.0110565	0.740886	0.216655	FALSE	FALSE	FALSE	GVY4Ce	42051492	0.69856	0.0285501	TRUE	reported	textfile	0.0176539	1.49367e-06	TRUE	reported	textfile	8125	TRUE	0.00284189	23.1505	22.6912
	rs55703838	T	C	T	C	-0.339008	-0.16775	0.0104977	0.97938	FALSE	FALSE	FALSE	GVY4Ce	1236954	0.0436425	0.083147	TRUE	reported	textfile	0.0749126	6.02846e-06	TRUE	reported	textfile	8125	TRUE	0.00251416	20.474	22.6912
	rs5996848	G	A	G	A	-0.0818347	0.0532463	0.73054	0.368336	FALSE	FALSE	FALSE	GVY4Ce	25181963	0.0290784	0.0243977	TRUE	reported	textfile	0.0175977	3.31436e-06	TRUE	reported	textfile	8125	TRUE	0.00265452	21.62	22.6912
	rs62381620	G	T	G	T	-0.288241	-0.0419955	0.0302787	0.969901	FALSE	FALSE	FALSE	GVY4Ce	139350290	0.543966	0.0692051	TRUE	reported	textfile	0.044521	9.52738e-11	TRUE	reported	textfile	8125	TRUE	0.00513244	41.9059	22.6912
	rs72801867	G	A	G	A	0.100144	0.0518662	0.149025	0.835969	FALSE	FALSE	FALSE	GVY4Ce	114478030	0.102589	0.0317724	TRUE	reported	textfile	0.021758	4.17167e-06	TRUE	reported	textfile	8125	TRUE	0.00260051	21.179	22.6912
	rs73396929	A	G	A	G	-0.125973	-0.00333556	0.0935328	0.91715	FALSE	FALSE	FALSE	GVY4Ce	98588077	0.937309	0.0424091	TRUE	reported	textfile	0.0262548	1.6017e-06	TRUE	reported	textfile	8125	TRUE	0.00282544	23.016	22.6912
	rs7478	A	T	A	T	0.0697161	-0.0215447	0.42224	0.374812	FALSE	TRUE	TRUE	GVY4Ce	55487144	0.37864	0.0244714	TRUE	reported	textfile	0.0156795	8.73578e-06	TRUE	reported	textfile	8125	FALSE	0.0024273	19.7649	22.6912
	rs756874	G	A	G	A	0.0744947	0.0251774	0.366768	0.700312	FALSE	FALSE	FALSE	GVY4Ce	91174007	0.326783	0.0256751	TRUE	reported	textfile	0.0159556	3.02866e-06	TRUE	reported	textfile	8125	TRUE	0.0026757	21.793	22.6912
	rs77181656	T	C	T	C	-0.299894	0.0703221	0.0132503	0.980536	FALSE	FALSE	FALSE	GVY4Ce	11560832	0.393227	0.0823656	TRUE	reported	textfile	0.0676025	9.15901e-06	TRUE	reported	textfile	8125	TRUE	0.00241622	19.6745	22.6912
	rs9599028	A	T	A	T	0.0756554	-0.000727089	0.341971	0.334852	FALSE	TRUE	FALSE	GVY4Ce	65857995	0.976731	0.0249283	TRUE	reported	textfile	0.0162189	3.0913e-06	TRUE	reported	textfile	8125	TRUE	0.00267087	21.7536	22.6912
GCST90199679	rs10250619	C	T	C	T	-0.0931159	0.0239119	0.782659	0.216349	FALSE	FALSE	FALSE	GVY4Ce	17673607	0.402122	0.02854	TRUE	reported	textfile	0.0209692	8.97073e-06	TRUE	reported	textfile	6496	TRUE	0.00302637	19.7129	21.1467
	rs10823297	C	T	C	T	-0.224729	-0.0332373	0.0308071	0.97003	FALSE	FALSE	FALSE	GVY4Ce	69085335	0.631677	0.0693358	TRUE	reported	textfile	0.0497919	6.38084e-06	TRUE	reported	textfile	6496	TRUE	0.00312604	20.3642	21.1467
	rs11129828	T	C	T	C	-0.089998	0.0155365	0.282532	0.741996	FALSE	FALSE	FALSE	GVY4Ce	39406103	0.564153	0.026941	TRUE	reported	textfile	0.0193473	3.29205e-06	TRUE	reported	textfile	6496	TRUE	0.00331997	21.6317	21.1467
	rs11167700	T	A	T	A	-0.109661	-0.0336235	0.169783	0.152297	FALSE	TRUE	FALSE	GVY4Ce	154783191	0.302638	0.032619	TRUE	reported	textfile	0.0234168	2.8268e-06	TRUE	reported	textfile	6496	TRUE	0.00336465	21.9238	21.1467
	rs11608247	G	A	G	A	0.187711	0.00440491	0.0459105	0.981493	FALSE	FALSE	FALSE	GVY4Ce	64299099	0.959291	0.0862981	TRUE	reported	textfile	0.0413816	5.73078e-06	TRUE	reported	textfile	6496	TRUE	0.00315751	20.5699	21.1467
	rs117746629	T	A	T	A	0.173162	0.0154321	0.0571139	0.0584133	FALSE	TRUE	FALSE	GVY4Ce	25018686	0.759048	0.0503114	TRUE	reported	textfile	0.0376532	4.24806e-06	TRUE	reported	textfile	6496	TRUE	0.00324522	21.1431	21.1467
	rs12216347	G	A	G	A	-0.0823444	0.0137517	0.376398	0.696431	FALSE	FALSE	FALSE	GVY4Ce	168808954	0.592476	0.0256922	TRUE	reported	textfile	0.0183532	7.23523e-06	TRUE	reported	textfile	6496	TRUE	0.00308926	20.1238	21.1467
	rs13114094	C	T	C	T	0.107882	-0.00358241	0.16303	0.837348	FALSE	FALSE	FALSE	GVY4Ce	67837087	0.910892	0.0320107	TRUE	reported	textfile	0.0238873	6.29391e-06	TRUE	reported	textfile	6496	TRUE	0.00313009	20.3906	21.1467
	rs141568347	A	G	A	G	-0.751799	-2.13615	0.00302889	0.999902	FALSE	FALSE	FALSE	GVY4Ce	3516381	0.0983785	1.29247	TRUE	reported	textfile	0.158991	2.26109e-06	TRUE	reported	textfile	6496	TRUE	0.00343021	22.3524	21.1467
	rs143968247	A	G	A	G	-0.216775	0.145004	0.0343422	0.988542	FALSE	FALSE	FALSE	GVY4Ce	68697341	0.199685	0.113068	TRUE	reported	textfile	0.0480854	6.54011e-06	TRUE	reported	textfile	6496	TRUE	0.00311881	20.3169	21.1467
	rs148948230	T	C	T	C	-0.282226	-0.0727783	0.0189311	0.983527	FALSE	FALSE	FALSE	GVY4Ce	54205730	0.424672	0.0911619	TRUE	reported	textfile	0.0636719	9.31424e-06	TRUE	reported	textfile	6496	TRUE	0.00301537	19.641	21.1467
	rs149272613	T	C	T	C	-0.29112	-0.096532	0.0216199	0.986784	FALSE	FALSE	FALSE	GVY4Ce	180249379	0.358465	0.105121	TRUE	reported	textfile	0.0606833	1.60757e-06	TRUE	reported	textfile	6496	TRUE	0.0035304	23.0076	21.1467
	rs2090997	G	A	G	A	0.114676	-0.0716468	0.866667	0.108704	FALSE	FALSE	FALSE	GVY4Ce	158883384	0.0597517	0.038057	TRUE	reported	textfile	0.025701	8.12207e-06	TRUE	reported	textfile	6496	TRUE	0.00305541	19.9027	21.1467
	rs2313588	A	C	A	C	-0.121021	0.00732448	0.14737	0.814412	FALSE	FALSE	FALSE	GVY4Ce	62833658	0.812029	0.0307999	TRUE	reported	textfile	0.0257748	2.66179e-06	TRUE	reported	textfile	6496	TRUE	0.00338231	22.0393	21.1467
	rs2472297	T	C	T	C	0.0925819	-0.0226654	0.255244	0.751785	FALSE	FALSE	FALSE	GVY4Ce	74735539	0.404697	0.0272008	TRUE	reported	textfile	0.0198372	3.05496e-06	TRUE	reported	textfile	6496	TRUE	0.00334189	21.775	21.1467
	rs2749675	G	A	G	A	0.123184	-0.0201028	0.867047	0.128121	FALSE	FALSE	FALSE	GVY4Ce	157374474	0.565391	0.0349704	TRUE	reported	textfile	0.0258144	1.82477e-06	TRUE	reported	textfile	6496	TRUE	0.00349316	22.7641	21.1467
	rs324498	A	G	A	G	0.115581	-0.0155688	0.854157	0.16496	FALSE	FALSE	FALSE	GVY4Ce	9059545	0.626284	0.0319712	TRUE	reported	textfile	0.0253192	4.99551e-06	TRUE	reported	textfile	6496	TRUE	0.00319769	20.8324	21.1467
	rs4898864	A	T	A	T	-0.0828954	-0.0282121	0.576235	0.556639	FALSE	TRUE	TRUE	GVY4Ce	55443567	0.235094	0.0237608	TRUE	reported	textfile	0.0181741	5.08649e-06	TRUE	reported	textfile	6496	FALSE	0.00319242	20.798	21.1467
	rs62063470	C	G	C	G	-0.0855681	0.00689675	0.300507	0.307041	FALSE	TRUE	FALSE	GVY4Ce	6366068	0.787285	0.0255588	TRUE	reported	textfile	0.0193057	9.3244e-06	TRUE	reported	textfile	6496	TRUE	0.00301506	19.639	21.1467
	rs62095761	A	G	A	G	0.0959574	0.0345573	0.266528	0.784669	FALSE	FALSE	FALSE	GVY4Ce	12894289	0.231396	0.0288754	TRUE	reported	textfile	0.0199786	1.56307e-06	TRUE	reported	textfile	6496	TRUE	0.00353868	23.0618	21.1467
	rs62337911	G	A	G	A	-0.210473	0.0553968	0.038912	0.973333	FALSE	FALSE	FALSE	GVY4Ce	182887202	0.448996	0.0731705	TRUE	reported	textfile	0.0448249	2.66018e-06	TRUE	reported	textfile	6496	TRUE	0.00338249	22.0404	21.1467
	rs7593862	C	T	C	T	0.0884833	0.00480723	0.287106	0.800517	FALSE	FALSE	FALSE	GVY4Ce	23047125	0.870048	0.0293844	TRUE	reported	textfile	0.0192158	4.13035e-06	TRUE	reported	textfile	6496	TRUE	0.00325345	21.1969	21.1467
GCST90199680	rs10844993	G	T	G	T	0.0848311	0.0603381	0.230317	0.810657	FALSE	FALSE	FALSE	GVY4Ce	9871408	0.0450837	0.0301108	TRUE	reported	textfile	0.0180197	2.5055e-06	TRUE	reported	textfile	8182	TRUE	0.00270135	22.1569	23.7594
	rs11141654	A	G	A	G	-0.0960652	-0.0175164	0.177262	0.782849	FALSE	FALSE	FALSE	GVY4Ce	87030986	0.540362	0.0286092	TRUE	reported	textfile	0.0199883	1.53924e-06	TRUE	reported	textfile	8182	TRUE	0.00281512	23.0927	23.7594
	rs11879271	T	C	T	C	0.144537	0.00462756	0.0601982	0.956019	FALSE	FALSE	FALSE	GVY4Ce	39941114	0.934711	0.0564895	TRUE	reported	textfile	0.0321382	6.88067e-06	TRUE	reported	textfile	8182	TRUE	0.00246594	20.2213	23.7594
	rs12554019	G	C	G	C	-0.0882323	-0.0725472	0.186494	0.199406	FALSE	TRUE	FALSE	GVY4Ce	29241348	0.0136669	0.0294202	TRUE	reported	textfile	0.0197399	7.83132e-06	TRUE	reported	textfile	8182	TRUE	0.00243583	19.9737	23.7594
	rs12878802	C	T	C	T	-0.0800192	-0.00831104	0.426697	0.586327	FALSE	FALSE	FALSE	GVY4Ce	29432672	0.730579	0.0241351	TRUE	reported	textfile	0.0160357	6.03619e-07	TRUE	reported	textfile	8182	TRUE	0.00303412	24.8947	23.7594
	rs139897381	C	T	C	T	-0.327175	0.00842122	0.0129846	0.995617	FALSE	FALSE	FALSE	GVY4Ce	190042188	0.962608	0.179631	TRUE	reported	textfile	0.0666494	9.15899e-07	TRUE	reported	textfile	8182	TRUE	0.00293651	24.0914	23.7594
	rs1481852	G	A	G	A	-0.0810423	-0.0349927	0.671158	0.345846	FALSE	FALSE	FALSE	GVY4Ce	71839992	0.163159	0.025093	TRUE	reported	textfile	0.016792	1.39142e-06	TRUE	reported	textfile	8182	TRUE	0.00283873	23.2869	23.7594
	rs150955925	C	G	C	G	-0.310408	0.00636777	0.0129156	0.0174613	FALSE	TRUE	FALSE	GVY4Ce	11555380	0.942589	0.0884213	TRUE	reported	textfile	0.0669674	3.56585e-06	TRUE	reported	textfile	8182	TRUE	0.00261903	21.4799	23.7594
	rs186490153	C	T	C	T	-0.249031	-0.135927	0.0191531	0.986419	FALSE	FALSE	FALSE	GVY4Ce	142248590	0.188546	0.103375	TRUE	reported	textfile	0.0552526	6.57067e-06	TRUE	reported	textfile	8182	TRUE	0.00247665	20.3093	23.7594
	rs188729852	A	G	A	G	0.674078	0.0245404	0.00269773	0.980436	FALSE	FALSE	FALSE	GVY4Ce	66077437	0.778639	0.0873032	TRUE	reported	textfile	0.145858	3.81031e-06	TRUE	reported	textfile	8182	TRUE	0.00260356	21.3527	23.7594
	rs28415528	A	G	A	G	-0.119396	0.00792266	0.317791	0.729784	FALSE	FALSE	FALSE	GVY4Ce	151907285	0.764476	0.0264434	TRUE	reported	textfile	0.0162643	2.12024e-13	TRUE	reported	textfile	8182	TRUE	0.00654332	53.8769	23.7594
	rs34097396	A	G	A	G	-0.140136	-0.0551872	0.0644806	0.955312	FALSE	FALSE	FALSE	GVY4Ce	4572181	0.334813	0.0572205	TRUE	reported	textfile	0.0309815	6.0905e-06	TRUE	reported	textfile	8182	TRUE	0.00249431	20.4545	23.7594
	rs3752651	C	T	C	T	-0.0899675	0.0739495	0.207803	0.864086	FALSE	FALSE	FALSE	GVY4Ce	55161850	0.030058	0.0340887	TRUE	reported	textfile	0.0187912	1.68672e-06	TRUE	reported	textfile	8182	TRUE	0.00279375	22.9169	23.7594
	rs380155	T	C	T	C	-0.0732844	0.0113535	0.373797	0.609535	FALSE	FALSE	FALSE	GVY4Ce	119656566	0.637608	0.0241027	TRUE	reported	textfile	0.016032	4.85125e-06	TRUE	reported	textfile	8182	TRUE	0.0025473	20.8901	23.7594
	rs72668359	C	T	C	T	0.276546	0.285525	0.0166993	0.996479	FALSE	FALSE	FALSE	GVY4Ce	108907496	0.147739	0.197245	TRUE	reported	textfile	0.0589512	2.71731e-06	TRUE	reported	textfile	8182	TRUE	0.0026824	22.001	23.7594
	rs7741311	G	T	G	T	0.100181	-0.0154486	0.133583	0.899836	FALSE	FALSE	FALSE	GVY4Ce	158160562	0.692398	0.0390509	TRUE	reported	textfile	0.0220167	5.35886e-06	TRUE	reported	textfile	8182	TRUE	0.00252412	20.6995	23.7594
	rs79795772	A	G	A	G	-0.173164	-0.0412657	0.0397664	0.954593	FALSE	FALSE	FALSE	GVY4Ce	96753823	0.467227	0.0567618	TRUE	reported	textfile	0.0387063	7.68433e-06	TRUE	reported	textfile	8182	TRUE	0.00244023	20.0099	23.7594
	rs9302385	C	A	C	A	-0.0890214	-0.0258527	0.280432	0.706033	FALSE	FALSE	FALSE	GVY4Ce	20462998	0.318667	0.0259252	TRUE	reported	textfile	0.0167413	1.05216e-07	TRUE	reported	textfile	8182	TRUE	0.00344392	28.2686	23.7594
	rs9314051	A	C	A	C	0.0804413	0.0316837	0.697227	0.266672	FALSE	FALSE	FALSE	GVY4Ce	165050300	0.23454	0.026653	TRUE	reported	textfile	0.0164625	1.02727e-06	TRUE	reported	textfile	8182	TRUE	0.00290966	23.8704	23.7594
	rs9913532	T	C	T	C	-0.105503	0.0600958	0.126959	0.858798	FALSE	FALSE	FALSE	GVY4Ce	74267491	0.0753026	0.033788	TRUE	reported	textfile	0.0228355	3.8346e-06	TRUE	reported	textfile	8182	TRUE	0.00260206	21.3404	23.7594
GCST90199681	rs112809733	C	T	C	T	0.124361	-0.00540407	0.0976011	0.92982	FALSE	FALSE	FALSE	GVY4Ce	216040672	0.905951	0.0457402	TRUE	reported	textfile	0.0261853	2.04159e-06	TRUE	reported	textfile	8224	TRUE	0.00273515	22.5501	28.1801
	rs11574581	G	A	G	A	0.13927	-0.0680744	0.0848802	0.93863	FALSE	FALSE	FALSE	GVY4Ce	54667225	0.170323	0.049647	TRUE	reported	textfile	0.0278489	5.70626e-07	TRUE	reported	textfile	8224	TRUE	0.00303178	25.0031	28.1801
	rs118085936	C	T	C	T	0.159419	-0.0220406	0.0532585	0.937134	FALSE	FALSE	FALSE	GVY4Ce	83280712	0.654184	0.0492025	TRUE	reported	textfile	0.0348335	4.72581e-06	TRUE	reported	textfile	8224	TRUE	0.00254038	20.9402	28.1801
	rs12250365	A	G	A	G	0.0926098	0.000513083	0.231692	0.739782	FALSE	FALSE	FALSE	GVY4Ce	89772422	0.984738	0.0268211	TRUE	reported	textfile	0.0184154	4.93203e-07	TRUE	reported	textfile	8224	TRUE	0.00306574	25.284	28.1801
	rs12562486	T	G	T	G	0.751021	0.0500046	0.00231538	0.946477	FALSE	FALSE	FALSE	GVY4Ce	109896185	0.337516	0.0521378	TRUE	reported	textfile	0.161694	3.40587e-06	TRUE	reported	textfile	8224	TRUE	0.00261635	21.568	28.1801
	rs13384756	T	C	T	C	-0.222042	0.0263719	0.22539	0.822585	FALSE	FALSE	FALSE	GVY4Ce	73644538	0.391489	0.0307753	TRUE	reported	textfile	0.0183336	9.21015e-34	TRUE	reported	textfile	8224	TRUE	0.0175232	146.646	28.1801
	rs143584067	A	G	A	G	0.396114	-0.0262134	0.00760177	0.99283	FALSE	FALSE	FALSE	GVY4Ce	12161570	0.863533	0.152512	TRUE	reported	textfile	0.08856	7.71895e-06	TRUE	reported	textfile	8224	TRUE	0.00242676	20.0014	28.1801
	rs145729777	A	G	A	G	-0.463127	-0.307193	0.00554067	0.99867	FALSE	FALSE	FALSE	GVY4Ce	73243416	0.406489	0.370073	TRUE	reported	textfile	0.104841	9.98927e-06	TRUE	reported	textfile	8224	TRUE	0.00236715	19.5089	28.1801
	rs1479581	C	T	C	T	-0.0889207	0.0349013	0.20195	0.740048	FALSE	FALSE	FALSE	GVY4Ce	25646458	0.19468	0.0269122	TRUE	reported	textfile	0.0192855	4.01232e-06	TRUE	reported	textfile	8224	TRUE	0.00257834	21.2539	28.1801
	rs17470667	G	A	G	A	0.162122	-0.0558792	0.0512056	0.914711	FALSE	FALSE	FALSE	GVY4Ce	39371973	0.184961	0.0421528	TRUE	reported	textfile	0.0351403	3.95805e-06	TRUE	reported	textfile	8224	TRUE	0.00258147	21.2798	28.1801
	rs183489175	A	G	A	G	0.410446	-0.0870782	0.00721536	0.955806	FALSE	FALSE	FALSE	GVY4Ce	66418124	0.143733	0.0595597	TRUE	reported	textfile	0.0914386	7.16389e-06	TRUE	reported	textfile	8224	TRUE	0.00244403	20.1441	28.1801
	rs188077378	A	G	A	G	-0.188731	-0.124398	0.0449171	0.926065	FALSE	FALSE	FALSE	GVY4Ce	104217807	0.00443609	0.0437195	TRUE	reported	textfile	0.0376106	5.22012e-07	TRUE	reported	textfile	8224	TRUE	0.0030525	25.1745	28.1801
	rs35254234	A	G	A	G	0.321188	-0.190763	0.0127548	0.991032	FALSE	FALSE	FALSE	GVY4Ce	18702604	0.123035	0.123698	TRUE	reported	textfile	0.0693423	3.62288e-06	TRUE	reported	textfile	8224	TRUE	0.002602	21.4495	28.1801
	rs35538886	T	C	T	C	-0.128883	-0.0228773	0.0777478	0.88043	FALSE	FALSE	FALSE	GVY4Ce	117466443	0.530653	0.0364864	TRUE	reported	textfile	0.0289318	8.4008e-06	TRUE	reported	textfile	8224	TRUE	0.00240719	19.8397	28.1801
	rs5748916	A	G	A	G	-0.0747733	-0.0208885	0.324124	0.560014	FALSE	FALSE	FALSE	GVY4Ce	17156988	0.378966	0.0237422	TRUE	reported	textfile	0.0168719	9.34423e-06	TRUE	reported	textfile	8224	TRUE	0.00238257	19.6363	28.1801
	rs6503343	A	G	A	G	-0.112122	-0.0440671	0.112013	0.827166	FALSE	FALSE	FALSE	GVY4Ce	11018282	0.155797	0.0310474	TRUE	reported	textfile	0.0249261	6.85456e-06	TRUE	reported	textfile	8224	TRUE	0.00245427	20.2287	28.1801
	rs7029211	T	C	T	C	-0.27916	-0.0617237	0.983056	0.004457	FALSE	FALSE	FALSE	GVY4Ce	73862954	0.72185	0.173387	TRUE	reported	textfile	0.0605491	4.01752e-06	TRUE	reported	textfile	8224	TRUE	0.00257802	21.2513	28.1801
	rs72622236	C	A	C	A	-0.0740584	-0.0324404	0.385805	0.590124	FALSE	FALSE	FALSE	GVY4Ce	49627427	0.175703	0.023957	TRUE	reported	textfile	0.0160837	4.13367e-06	TRUE	reported	textfile	8224	TRUE	0.00257143	21.1968	28.1801
	rs74637339	A	T	A	T	0.218791	-0.0193392	0.0521596	0.0855671	FALSE	TRUE	FALSE	GVY4Ce	15586533	0.649995	0.0426191	TRUE	reported	textfile	0.0348214	3.31624e-10	TRUE	reported	textfile	8224	TRUE	0.00477753	39.4694	28.1801
	rs76619244	C	G	C	G	0.297392	-0.105706	0.0156997	0.00659609	FALSE	TRUE	FALSE	GVY4Ce	99815568	0.472317	0.147077	TRUE	reported	textfile	0.0628958	2.26377e-06	TRUE	reported	textfile	8224	TRUE	0.00271115	22.3517	28.1801
	rs76963882	C	T	C	T	0.0744623	0.00259965	0.304345	0.747114	FALSE	FALSE	FALSE	GVY4Ce	75702239	0.924056	0.0272711	TRUE	reported	textfile	0.0167632	8.91236e-06	TRUE	reported	textfile	8224	TRUE	0.00239351	19.7267	28.1801
	rs77585588	A	G	A	G	0.452071	0.0826348	0.00748539	0.993195	FALSE	FALSE	FALSE	GVY4Ce	45063972	0.549827	0.138181	TRUE	reported	textfile	0.0895868	4.50745e-07	TRUE	reported	textfile	8224	TRUE	0.00308674	25.4577	28.1801
GCST90199682	rs117283049	G	T	G	T	-0.187452	0.00390807	0.0356159	0.943943	FALSE	FALSE	FALSE	GVY4Ce	7669396	0.939759	0.0517124	TRUE	reported	textfile	0.0408701	4.50664e-06	TRUE	reported	textfile	7998	TRUE	0.00262329	21.031	31.6981
	rs11741406	A	G	A	G	0.0865002	-0.0241004	0.193256	0.792066	FALSE	FALSE	FALSE	GVY4Ce	6518191	0.410074	0.0292565	TRUE	reported	textfile	0.0193084	7.4667e-06	TRUE	reported	textfile	7998	TRUE	0.00250306	20.0647	31.6981
	rs12490555	T	C	T	C	0.0844343	-0.016306	0.233488	0.747605	FALSE	FALSE	FALSE	GVY4Ce	53194820	0.546661	0.0270518	TRUE	reported	textfile	0.0180873	3.03917e-06	TRUE	reported	textfile	7998	TRUE	0.00271724	21.7862	31.6981
	rs12726652	A	G	A	G	-0.0844405	-0.0158158	0.201091	0.713114	FALSE	FALSE	FALSE	GVY4Ce	106889954	0.547018	0.0262619	TRUE	reported	textfile	0.0186944	6.27565e-06	TRUE	reported	textfile	7998	TRUE	0.00254443	20.3972	31.6981
	rs12989742	C	T	C	T	0.0759281	0.0131232	0.292502	0.628101	FALSE	FALSE	FALSE	GVY4Ce	240789660	0.590829	0.0244092	TRUE	reported	textfile	0.0168742	6.80606e-06	TRUE	reported	textfile	7998	TRUE	0.0025251	20.2418	31.6981
	rs138767120	G	C	G	C	-0.208734	0.0856085	0.0298171	0.0263587	FALSE	TRUE	FALSE	GVY4Ce	87449270	0.238965	0.0726988	TRUE	reported	textfile	0.0445316	2.76799e-06	TRUE	reported	textfile	7998	TRUE	0.00273954	21.9655	31.6981
	rs140994086	T	C	T	C	0.211726	0.0525581	0.0261017	0.98845	FALSE	FALSE	FALSE	GVY4Ce	51773494	0.635644	0.110929	TRUE	reported	textfile	0.0469464	6.48399e-06	TRUE	reported	textfile	7998	TRUE	0.00253664	20.3346	31.6981
	rs145449041	C	T	C	T	0.390038	-0.125927	0.00789672	0.994224	FALSE	FALSE	FALSE	GVY4Ce	59983063	0.409807	0.152781	TRUE	reported	textfile	0.0861107	5.91258e-06	TRUE	reported	textfile	7998	TRUE	0.00255862	20.5112	31.6981
	rs147045808	T	C	T	C	0.347563	-0.0817132	0.00949925	0.98529	FALSE	FALSE	FALSE	GVY4Ce	92545337	0.418873	0.101083	TRUE	reported	textfile	0.077241	6.80406e-06	TRUE	reported	textfile	7998	TRUE	0.00252518	20.2424	31.6981
	rs148170430	C	T	C	T	0.482554	-0.115649	0.00661459	0.983244	FALSE	FALSE	FALSE	GVY4Ce	159148535	0.213062	0.0928764	TRUE	reported	textfile	0.0941732	2.98948e-07	TRUE	reported	textfile	7998	TRUE	0.00327214	26.25	31.6981
	rs148874160	A	G	A	G	0.253526	0.042949	0.0209967	0.986984	FALSE	FALSE	FALSE	GVY4Ce	23183054	0.673974	0.102089	TRUE	reported	textfile	0.0529352	1.67306e-06	TRUE	reported	textfile	7998	TRUE	0.00285977	22.9323	31.6981
	rs149152049	A	C	A	C	-0.281055	-0.0474324	0.0157189	0.988536	FALSE	FALSE	FALSE	GVY4Ce	211797411	0.659198	0.107551	TRUE	reported	textfile	0.0612479	4.45782e-06	TRUE	reported	textfile	7998	TRUE	0.00262589	21.0519	31.6981
	rs149381367	G	C	G	C	0.283943	-0.226408	0.014361	0.00454263	FALSE	TRUE	FALSE	GVY4Ce	159109365	0.198701	0.176157	TRUE	reported	textfile	0.064014	9.18008e-06	TRUE	reported	textfile	7998	TRUE	0.00245394	19.67	31.6981
	rs17011873	C	T	C	T	-0.0849946	-0.0217347	0.21935	0.852185	FALSE	FALSE	FALSE	GVY4Ce	124688613	0.517202	0.0335586	TRUE	reported	textfile	0.0183847	3.78013e-06	TRUE	reported	textfile	7998	TRUE	0.0026652	21.3679	31.6981
	rs17544266	C	T	C	T	-0.19071	-0.015508	0.0326658	0.969318	FALSE	FALSE	FALSE	GVY4Ce	42728817	0.821417	0.0687037	TRUE	reported	textfile	0.042891	8.73215e-06	TRUE	reported	textfile	7998	TRUE	0.00246582	19.7654	31.6981
	rs200399858	T	C	T	C	-0.120814	0.0179133	0.507921	0.472352	FALSE	FALSE	FALSE	GVY4Ce	32851497	0.44643	0.0235274	TRUE	reported	textfile	0.0151785	1.72668e-15	TRUE	reported	textfile	7998	TRUE	0.00785903	63.3386	31.6981
	rs2285761	T	G	T	G	0.0877735	-0.0284988	0.179857	0.776513	FALSE	FALSE	FALSE	GVY4Ce	7768996	0.314707	0.0283459	TRUE	reported	textfile	0.019671	8.11683e-06	TRUE	reported	textfile	7998	TRUE	0.00248321	19.9051	31.6981
	rs2727548	A	G	A	G	-0.0708743	0.00408584	0.506254	0.572204	FALSE	FALSE	FALSE	GVY4Ce	151726259	0.863767	0.0238129	TRUE	reported	textfile	0.0154929	4.77032e-06	TRUE	reported	textfile	7998	TRUE	0.00260973	20.922	31.6981
	rs3211568	A	G	A	G	0.08928	-0.022984	0.192497	0.904072	FALSE	FALSE	FALSE	GVY4Ce	89563372	0.562347	0.0396715	TRUE	reported	textfile	0.0193344	3.88059e-06	TRUE	reported	textfile	7998	TRUE	0.00265894	21.3176	31.6981
	rs34463406	T	C	T	C	-0.0690213	0.0264626	0.380988	0.554024	FALSE	FALSE	FALSE	GVY4Ce	115969714	0.261924	0.0235882	TRUE	reported	textfile	0.0155186	8.68172e-06	TRUE	reported	textfile	7998	TRUE	0.00246721	19.7766	31.6981
	rs4390625	G	A	G	A	-0.0943027	0.00525585	0.740662	0.177332	FALSE	FALSE	FALSE	GVY4Ce	39464094	0.864244	0.0307407	TRUE	reported	textfile	0.0172638	4.69609e-08	TRUE	reported	textfile	7998	TRUE	0.00371687	29.8309	31.6981
	rs61197953	C	T	C	T	0.0706504	-0.016789	0.420836	0.585138	FALSE	FALSE	FALSE	GVY4Ce	1613350	0.483767	0.0239755	TRUE	reported	textfile	0.0154811	5.02737e-06	TRUE	reported	textfile	7998	TRUE	0.00259726	20.8217	31.6981
	rs6736866	G	C	G	C	-0.0830696	-0.0295846	0.230629	0.207497	FALSE	TRUE	FALSE	GVY4Ce	73434858	0.30791	0.0290154	TRUE	reported	textfile	0.017955	3.71801e-06	TRUE	reported	textfile	7998	TRUE	0.00266914	21.3996	31.6981
	rs74251908	T	C	T	C	0.197529	-0.0202745	0.034294	0.97395	FALSE	FALSE	FALSE	GVY4Ce	430928	0.78008	0.0726126	TRUE	reported	textfile	0.0418217	2.32261e-06	TRUE	reported	textfile	7998	TRUE	0.00278142	22.3023	31.6981
	rs75459253	A	G	A	G	0.224504	0.0668367	0.028192	0.964145	FALSE	FALSE	FALSE	GVY4Ce	11989017	0.290474	0.0632276	TRUE	reported	textfile	0.0458815	9.92442e-07	TRUE	reported	textfile	7998	TRUE	0.00298465	23.9367	31.6981
	rs78978101	A	C	A	C	-0.348657	0.0837434	0.00969841	0.96501	FALSE	FALSE	FALSE	GVY4Ce	130026756	0.199233	0.0652339	TRUE	reported	textfile	0.077783	7.37996e-06	TRUE	reported	textfile	7998	TRUE	0.00250586	20.0872	31.6981
	rs8025295	G	C	G	C	0.0862129	-0.0584064	0.775299	0.77409	FALSE	TRUE	FALSE	GVY4Ce	93464119	0.0392545	0.0283319	TRUE	reported	textfile	0.0184313	2.90351e-06	TRUE	reported	textfile	7998	TRUE	0.00272813	21.8738	31.6981
	rs8101881	T	C	T	C	0.254197	-0.00816381	0.606808	0.32261	FALSE	FALSE	FALSE	GVY4Ce	32873722	0.746927	0.0252989	TRUE	reported	textfile	0.0152966	5.17004e-62	TRUE	reported	textfile	7998	TRUE	0.0333755	276.085	31.6981
	rs929300	T	C	T	C	0.186096	-0.00405305	0.0348954	0.934467	FALSE	FALSE	FALSE	GVY4Ce	74025708	0.931663	0.0472646	TRUE	reported	textfile	0.0415711	7.58545e-06	TRUE	reported	textfile	7998	TRUE	0.00249933	20.0347	31.6981
GCST90199683	rs10999904	A	G	A	G	-0.134401	-0.0580278	0.0982241	0.893087	FALSE	FALSE	FALSE	GVY4Ce	71591392	0.130926	0.0384173	TRUE	reported	textfile	0.0257002	1.69892e-07	TRUE	reported	textfile	8208	TRUE	0.00332086	27.3417	22.9322
	rs11227288	C	G	C	G	0.0899903	0.0858979	0.180316	0.158048	FALSE	TRUE	FALSE	GVY4Ce	65749117	0.00637647	0.0314902	TRUE	reported	textfile	0.019745	5.17353e-06	TRUE	reported	textfile	8208	TRUE	0.00252431	20.7669	22.9322
	rs11518601	T	C	T	C	-0.111869	-0.0210565	0.118732	0.837377	FALSE	FALSE	FALSE	GVY4Ce	55238964	0.513187	0.0322023	TRUE	reported	textfile	0.0240488	3.29131e-06	TRUE	reported	textfile	8208	TRUE	0.00262937	21.6335	22.9322
	rs115634566	C	G	C	G	0.241854	-0.0767215	0.0194495	0.00579747	FALSE	TRUE	FALSE	GVY4Ce	1675590	0.644963	0.166507	TRUE	reported	textfile	0.0544403	8.88975e-06	TRUE	reported	textfile	8208	TRUE	0.00239875	19.7315	22.9322
	rs11575549	T	C	T	C	-0.37948	-0.0493444	0.0179246	0.990303	FALSE	FALSE	FALSE	GVY4Ce	50462479	0.680641	0.119887	TRUE	reported	textfile	0.056925	2.62308e-11	TRUE	reported	textfile	8208	TRUE	0.00538505	44.4289	22.9322
	rs118052117	T	C	T	C	0.234493	0.000939856	0.0218319	0.990817	FALSE	FALSE	FALSE	GVY4Ce	42517608	0.993879	0.122503	TRUE	reported	textfile	0.0518474	6.10424e-06	TRUE	reported	textfile	8208	TRUE	0.00248592	20.4503	22.9322
	rs11889711	T	C	T	C	-0.0719998	0.0150127	0.620089	0.364609	FALSE	FALSE	FALSE	GVY4Ce	17935969	0.537136	0.0243259	TRUE	reported	textfile	0.0157071	4.56382e-06	TRUE	reported	textfile	8208	TRUE	0.00255342	21.007	22.9322
	rs13353672	A	G	A	G	0.0847569	-0.0167193	0.206417	0.728348	FALSE	FALSE	FALSE	GVY4Ce	181238448	0.532485	0.0267845	TRUE	reported	textfile	0.0190801	8.90564e-06	TRUE	reported	textfile	8208	TRUE	0.00239833	19.728	22.9322
	rs138960177	T	C	T	C	0.204895	0.0149938	0.0350566	0.962557	FALSE	FALSE	FALSE	GVY4Ce	189747117	0.822552	0.0668576	TRUE	reported	textfile	0.0426063	1.51653e-06	TRUE	reported	textfile	8208	TRUE	0.00280967	23.1211	22.9322
	rs146089696	C	A	C	A	-0.227745	0.0246558	0.0258431	0.99045	FALSE	FALSE	FALSE	GVY4Ce	240648988	0.840525	0.12253	TRUE	reported	textfile	0.048348	2.47072e-06	TRUE	reported	textfile	8208	TRUE	0.00269607	22.1837	22.9322
	rs1479	G	T	G	T	0.0905519	-0.0292536	0.197771	0.750165	FALSE	FALSE	FALSE	GVY4Ce	113217527	0.282712	0.0272317	TRUE	reported	textfile	0.0192077	2.42479e-06	TRUE	reported	textfile	8208	TRUE	0.00270043	22.2197	22.9322
	rs184875464	T	C	T	C	0.525364	0.470052	0.00561386	0.99892	FALSE	FALSE	FALSE	GVY4Ce	70288328	0.195257	0.362923	TRUE	reported	textfile	0.102005	2.59993e-07	TRUE	reported	textfile	8208	TRUE	0.00322136	26.5199	22.9322
	rs1929252	C	A	C	A	-0.0790401	0.0169185	0.251463	0.718026	FALSE	FALSE	FALSE	GVY4Ce	29902027	0.518577	0.0262083	TRUE	reported	textfile	0.0175887	6.99663e-06	TRUE	reported	textfile	8208	TRUE	0.00245427	20.1893	22.9322
	rs2187200	G	T	G	T	-0.0712121	-0.022119	0.361312	0.618805	FALSE	FALSE	FALSE	GVY4Ce	162035178	0.366673	0.0245025	TRUE	reported	textfile	0.0160922	9.63256e-06	TRUE	reported	textfile	8208	TRUE	0.00238015	19.5781	22.9322
	rs240759	A	G	A	G	-0.170792	0.0173097	0.955495	0.024449	FALSE	FALSE	FALSE	GVY4Ce	17872813	0.822556	0.0771866	TRUE	reported	textfile	0.0381475	7.56436e-06	TRUE	reported	textfile	8208	TRUE	0.00243616	20.04	22.9322
	rs2999546	T	G	T	G	0.0721966	0.021031	0.637541	0.332639	FALSE	FALSE	FALSE	GVY4Ce	151935363	0.399596	0.0249673	TRUE	reported	textfile	0.0158469	5.2164e-06	TRUE	reported	textfile	8208	TRUE	0.00252238	20.751	22.9322
	rs35291122	A	G	A	G	-0.220159	0.0259998	0.0289393	0.96666	FALSE	FALSE	FALSE	GVY4Ce	44601011	0.682601	0.0635822	TRUE	reported	textfile	0.0457359	1.48155e-06	TRUE	reported	textfile	8208	TRUE	0.00281512	23.1661	22.9322
	rs41280729	G	A	G	A	-0.148381	0.0203505	0.0591969	0.947502	FALSE	FALSE	FALSE	GVY4Ce	5571105	0.699496	0.0527215	TRUE	reported	textfile	0.0323839	4.6066e-06	TRUE	reported	textfile	8208	TRUE	0.00255124	20.989	22.9322
	rs4584428	T	G	T	G	0.109808	0.00566861	0.11603	0.84407	FALSE	FALSE	FALSE	GVY4Ce	234491997	0.86226	0.0326726	TRUE	reported	textfile	0.0239353	4.48109e-06	TRUE	reported	textfile	8208	TRUE	0.00255765	21.0419	22.9322
	rs5751124	A	G	A	G	0.19056	0.0101505	0.0332277	0.961451	FALSE	FALSE	FALSE	GVY4Ce	41550972	0.868097	0.0611195	TRUE	reported	textfile	0.042405	6.99601e-06	TRUE	reported	textfile	8208	TRUE	0.00245428	20.1894	22.9322
	rs72551330	C	T	C	T	0.303539	-0.205351	0.0147633	0.984252	FALSE	FALSE	FALSE	GVY4Ce	233672032	0.0275956	0.0932149	TRUE	reported	textfile	0.0629629	1.42903e-06	TRUE	reported	textfile	8208	TRUE	0.00282354	23.2356	22.9322
	rs72663013	T	G	T	G	-0.282142	0.0974036	0.0196341	0.99075	FALSE	FALSE	FALSE	GVY4Ce	56843191	0.433814	0.124449	TRUE	reported	textfile	0.0546119	2.38756e-07	TRUE	reported	textfile	8208	TRUE	0.00324126	26.6843	22.9322
	rs73152633	T	C	T	C	0.179659	-0.0335587	0.0404457	0.924061	FALSE	FALSE	FALSE	GVY4Ce	149475443	0.451738	0.0445951	TRUE	reported	textfile	0.0383524	2.80725e-06	TRUE	reported	textfile	8208	TRUE	0.00266634	21.9385	22.9322
	rs76522692	G	A	G	A	-0.220452	-0.0649116	0.0266439	0.925744	FALSE	FALSE	FALSE	GVY4Ce	117400423	0.157876	0.0459632	TRUE	reported	textfile	0.0473306	3.19771e-06	TRUE	reported	textfile	8208	TRUE	0.00263609	21.6889	22.9322
	rs77535679	A	G	A	G	0.272146	-0.130805	0.021052	0.994202	FALSE	FALSE	FALSE	GVY4Ce	46593678	0.396169	0.154163	TRUE	reported	textfile	0.0527254	2.4488e-07	TRUE	reported	textfile	8208	TRUE	0.00323534	26.6353	22.9322
	rs78906653	T	C	T	C	-0.144801	-0.0247963	0.0749114	0.93677	FALSE	FALSE	FALSE	GVY4Ce	50427357	0.602994	0.0476761	TRUE	reported	textfile	0.0290437	6.17592e-07	TRUE	reported	textfile	8208	TRUE	0.00301918	24.8504	22.9322
	rs79441299	T	C	T	C	0.29338	-0.031139	0.014453	0.947101	FALSE	FALSE	FALSE	GVY4Ce	12355766	0.560744	0.0535277	TRUE	reported	textfile	0.0638741	4.36696e-06	TRUE	reported	textfile	8208	TRUE	0.00256365	21.0914	22.9322
	rs8061485	C	T	C	T	-0.0845625	-0.0251847	0.279379	0.706695	FALSE	FALSE	FALSE	GVY4Ce	20463360	0.331802	0.0259505	TRUE	reported	textfile	0.0169225	5.82136e-07	TRUE	reported	textfile	8208	TRUE	0.00303298	24.9644	22.9322
	rs867704	G	C	G	C	-0.0700153	-0.00108852	0.561746	0.53938	FALSE	TRUE	TRUE	GVY4Ce	130051469	0.963538	0.0238114	TRUE	reported	textfile	0.0154721	6.03244e-06	TRUE	reported	textfile	8208	FALSE	0.00248867	20.473	22.9322
	rs9866361	A	G	A	G	0.0952028	-0.0509905	0.164093	0.842646	FALSE	FALSE	FALSE	GVY4Ce	179190061	0.113165	0.0321884	TRUE	reported	textfile	0.0206127	3.86264e-06	TRUE	reported	textfile	8208	TRUE	0.00259218	21.3267	22.9322
GCST90199684	rs10006032	G	A	G	A	-0.15194	-0.0593479	0.0573319	0.964521	FALSE	FALSE	FALSE	GVY4Ce	159919833	0.355811	0.0642727	TRUE	reported	textfile	0.0334117	5.42817e-06	TRUE	reported	textfile	8212	TRUE	0.00251192	20.6748	21.2408
	rs10072491	T	C	T	C	-0.17568	0.00016016	0.0420795	0.958972	FALSE	FALSE	FALSE	GVY4Ce	4715384	0.997821	0.0586366	TRUE	reported	textfile	0.038446	4.88843e-06	TRUE	reported	textfile	8212	TRUE	0.00253624	20.8755	21.2408
	rs10735636	G	C	G	C	0.266346	-0.125594	0.981772	0.97109	FALSE	TRUE	FALSE	GVY4Ce	74877161	0.0842908	0.0727525	TRUE	reported	textfile	0.0602083	9.7007e-06	TRUE	reported	textfile	8212	TRUE	0.00237737	19.5647	21.2408
	rs11033752	T	C	T	C	-0.0907355	0.020892	0.17797	0.837042	FALSE	FALSE	FALSE	GVY4Ce	36708159	0.510507	0.0317485	TRUE	reported	textfile	0.0204967	9.56226e-06	TRUE	reported	textfile	8212	TRUE	0.00238069	19.5921	21.2408
	rs11160050	G	A	G	A	0.125943	0.00147556	0.0875843	0.879904	FALSE	FALSE	FALSE	GVY4Ce	92187131	0.968266	0.0370895	TRUE	reported	textfile	0.028029	7.01221e-06	TRUE	reported	textfile	8212	TRUE	0.00245255	20.1849	21.2408
	rs113627835	C	G	C	G	0.382342	-0.11942	0.00861964	0.0095778	FALSE	TRUE	FALSE	GVY4Ce	225063702	0.329519	0.122472	TRUE	reported	textfile	0.0840396	5.37605e-06	TRUE	reported	textfile	8212	TRUE	0.00251417	20.6933	21.2408
	rs114473062	T	C	T	C	0.226158	-0.0649323	0.025608	0.99215	FALSE	FALSE	FALSE	GVY4Ce	32419463	0.624839	0.132785	TRUE	reported	textfile	0.049117	4.135e-06	TRUE	reported	textfile	8212	TRUE	0.00257508	21.196	21.2408
	rs117168942	C	T	C	T	0.191261	-0.152075	0.0332722	0.994054	FALSE	FALSE	FALSE	GVY4Ce	21701387	0.3107	0.150011	TRUE	reported	textfile	0.0431454	9.29617e-06	TRUE	reported	textfile	8212	TRUE	0.00238724	19.6462	21.2408
	rs12447287	C	T	C	T	0.081903	-0.00572512	0.245284	0.692367	FALSE	FALSE	FALSE	GVY4Ce	56904086	0.822365	0.0255012	TRUE	reported	textfile	0.0180828	5.91739e-06	TRUE	reported	textfile	8212	TRUE	0.00249193	20.5098	21.2408
	rs12858688	T	C	T	C	-0.22125	0.0301749	0.0249358	0.991454	FALSE	FALSE	FALSE	GVY4Ce	69782332	0.818603	0.131572	TRUE	reported	textfile	0.0491192	6.65784e-06	TRUE	reported	textfile	8212	TRUE	0.00246458	20.2842	21.2408
	rs17410962	A	G	A	G	-0.11411	0.115565	0.120383	0.905451	FALSE	FALSE	FALSE	GVY4Ce	19990569	0.00475729	0.0409366	TRUE	reported	textfile	0.0235805	1.30378e-06	TRUE	reported	textfile	8212	TRUE	0.00284352	23.4118	21.2408
	rs2943179	T	C	T	C	-0.0822174	-0.0552362	0.221974	0.856048	FALSE	FALSE	FALSE	GVY4Ce	87113088	0.099307	0.0335125	TRUE	reported	textfile	0.0185161	8.98228e-06	TRUE	reported	textfile	8212	TRUE	0.00239518	19.7116	21.2408
	rs56354314	A	G	A	G	0.235446	0.0443926	0.022346	0.973067	FALSE	FALSE	FALSE	GVY4Ce	106280157	0.546127	0.0735497	TRUE	reported	textfile	0.0519464	5.82959e-06	TRUE	reported	textfile	8212	TRUE	0.00249539	20.5384	21.2408
	rs62385039	G	A	G	A	-0.258001	0.00116704	0.0201079	0.986762	FALSE	FALSE	FALSE	GVY4Ce	895419	0.991307	0.107115	TRUE	reported	textfile	0.0552286	2.98985e-06	TRUE	reported	textfile	8212	TRUE	0.00265041	21.8177	21.2408
	rs6475038	G	C	G	C	-0.0721413	-0.00400289	0.49482	0.492471	FALSE	TRUE	TRUE	GVY4Ce	16346456	0.864779	0.0235057	TRUE	reported	textfile	0.0159373	5.99468e-06	TRUE	reported	textfile	8212	FALSE	0.0024889	20.4848	21.2408
	rs75445316	T	C	T	C	0.241198	-0.120469	0.024875	0.984368	FALSE	FALSE	FALSE	GVY4Ce	114276169	0.203257	0.0946842	TRUE	reported	textfile	0.049473	1.0862e-06	TRUE	reported	textfile	8212	TRUE	0.00288607	23.7632	21.2408
	rs77982886	G	A	G	A	0.316857	0.101747	0.0152346	0.994945	FALSE	FALSE	FALSE	GVY4Ce	64106675	0.519843	0.158093	TRUE	reported	textfile	0.0635267	6.10775e-07	TRUE	reported	textfile	8212	TRUE	0.00302031	24.8719	21.2408
	rs964184	C	G	C	G	-0.116525	-0.132108	0.868723	0.855516	FALSE	TRUE	FALSE	GVY4Ce	116778201	4.59547e-05	0.0324169	TRUE	reported	textfile	0.0229017	3.6178e-07	TRUE	reported	textfile	8212	TRUE	0.00314258	25.882	21.2408
	rs9894638	C	T	C	T	0.0857298	0.0222505	0.211593	0.721735	FALSE	FALSE	FALSE	GVY4Ce	46835535	0.39836	0.0263458	TRUE	reported	textfile	0.0192292	8.2607e-06	TRUE	reported	textfile	8212	TRUE	0.00241458	19.8717	21.2408
GCST90199685	rs111764634	A	C	A	C	0.160187	0.120346	0.0711024	0.962505	FALSE	FALSE	FALSE	GVY4Ce	26030131	0.053454	0.0623154	TRUE	reported	textfile	0.03428	2.96979e-06	TRUE	reported	textfile	6378	TRUE	0.00341196	21.8291	20.8705
	rs113718400	A	C	A	C	-0.278095	0.0392862	0.0198899	0.979263	FALSE	FALSE	FALSE	GVY4Ce	241640505	0.632657	0.0821901	TRUE	reported	textfile	0.0628536	9.66753e-06	TRUE	reported	textfile	6378	TRUE	0.00305992	19.57	20.8705
	rs11552067	A	G	A	G	0.0845951	0.0147933	0.587463	0.465292	FALSE	FALSE	FALSE	GVY4Ce	44330365	0.532811	0.0237178	TRUE	reported	textfile	0.0181892	3.30593e-06	TRUE	reported	textfile	6378	TRUE	0.00337993	21.6236	20.8705
	rs117372736	T	G	T	G	0.346995	0.0145072	0.0135114	0.981448	FALSE	FALSE	FALSE	GVY4Ce	69477429	0.871145	0.089438	TRUE	reported	textfile	0.0766527	5.98694e-06	TRUE	reported	textfile	6378	TRUE	0.00320268	20.4859	20.8705
	rs11924632	G	A	G	A	-0.0837752	-0.0239881	0.319162	0.685843	FALSE	FALSE	FALSE	GVY4Ce	8342446	0.34654	0.0254834	TRUE	reported	textfile	0.0189266	9.58506e-06	TRUE	reported	textfile	6378	TRUE	0.00306245	19.5862	20.8705
	rs12498693	A	C	A	C	-0.140175	-0.0583468	0.0908947	0.907359	FALSE	FALSE	FALSE	GVY4Ce	21558733	0.148463	0.0403789	TRUE	reported	textfile	0.0306696	4.86572e-06	TRUE	reported	textfile	6378	TRUE	0.00326453	20.8828	20.8705
	rs141172381	A	G	A	G	0.286907	0.0154415	0.0189245	0.996405	FALSE	FALSE	FALSE	GVY4Ce	155364642	0.938892	0.201423	TRUE	reported	textfile	0.0647015	9.23638e-06	TRUE	reported	textfile	6378	TRUE	0.00307349	19.657	20.8705
	rs17035713	G	A	G	A	-0.176168	0.0340213	0.0555824	0.894157	FALSE	FALSE	FALSE	GVY4Ce	10780848	0.372973	0.0381867	TRUE	reported	textfile	0.0391241	6.70697e-06	TRUE	reported	textfile	6378	TRUE	0.00316886	20.2689	20.8705
	rs190199861	G	A	G	A	0.297064	0.0254971	0.018813	0.964928	FALSE	FALSE	FALSE	GVY4Ce	127836164	0.685496	0.0629597	TRUE	reported	textfile	0.0645441	4.17461e-06	TRUE	reported	textfile	6378	TRUE	0.00331026	21.1763	20.8705
	rs34291068	A	C	A	C	0.159431	-0.0441085	0.0631083	0.943959	FALSE	FALSE	FALSE	GVY4Ce	33157079	0.384457	0.0507161	TRUE	reported	textfile	0.0358652	8.77744e-06	TRUE	reported	textfile	6378	TRUE	0.00308867	19.7544	20.8705
	rs4946146	T	C	T	C	0.311867	-0.152068	0.0182161	0.987119	FALSE	FALSE	FALSE	GVY4Ce	116234813	0.156527	0.107329	TRUE	reported	textfile	0.0660179	2.31267e-06	TRUE	reported	textfile	6378	TRUE	0.0034867	22.309	20.8705
	rs4972489	C	A	C	A	0.109484	-0.0635978	0.219483	0.75608	FALSE	FALSE	FALSE	GVY4Ce	175869870	0.0202558	0.0273943	TRUE	reported	textfile	0.0215719	3.86888e-07	TRUE	reported	textfile	6378	TRUE	0.00402244	25.7507	20.8705
	rs55920120	A	C	A	C	0.211234	0.0468725	0.0354543	0.976993	FALSE	FALSE	FALSE	GVY4Ce	71527599	0.542653	0.076991	TRUE	reported	textfile	0.0475892	9.05017e-06	TRUE	reported	textfile	6378	TRUE	0.00307955	19.6958	20.8705
	rs56327721	T	C	T	C	-0.132143	0.0920787	0.106214	0.943874	FALSE	FALSE	FALSE	GVY4Ce	78409221	0.0686136	0.0505662	TRUE	reported	textfile	0.0284005	3.27423e-06	TRUE	reported	textfile	6378	TRUE	0.00338283	21.6421	20.8705
	rs59927118	T	C	T	C	0.0964238	0.0857744	0.233493	0.809173	FALSE	FALSE	FALSE	GVY4Ce	10927516	0.0047277	0.0303624	TRUE	reported	textfile	0.0209287	4.0802e-06	TRUE	reported	textfile	6378	TRUE	0.00331708	21.2201	20.8705
	rs6081988	C	T	C	T	0.130879	-0.0289389	0.101462	0.881541	FALSE	FALSE	FALSE	GVY4Ce	20401286	0.427092	0.0364387	TRUE	reported	textfile	0.0293982	8.5098e-06	TRUE	reported	textfile	6378	TRUE	0.00309789	19.8135	20.8705
	rs72679893	T	C	T	C	-0.141425	0.0371862	0.0830319	0.87728	FALSE	FALSE	FALSE	GVY4Ce	99294430	0.300085	0.0358853	TRUE	reported	textfile	0.031732	8.31717e-06	TRUE	reported	textfile	6378	TRUE	0.00310472	19.8573	20.8705
	rs73121585	A	C	A	C	-0.286922	0.292174	0.0186813	0.997669	FALSE	FALSE	FALSE	GVY4Ce	78579458	0.234677	0.245855	TRUE	reported	textfile	0.0649528	9.98952e-06	TRUE	reported	textfile	6378	TRUE	0.00305015	19.5072	20.8705
	rs7643986	C	T	C	T	0.237339	0.0296313	0.0314905	0.971267	FALSE	FALSE	FALSE	GVY4Ce	194026260	0.673788	0.0703906	TRUE	reported	textfile	0.0507469	2.91221e-06	TRUE	reported	textfile	6378	TRUE	0.00341781	21.8667	20.8705
	rs77599553	A	T	A	T	-0.26624	0.212558	0.024663	0.00625416	FALSE	TRUE	FALSE	GVY4Ce	114230144	0.167513	0.154001	TRUE	reported	textfile	0.0570875	3.10541e-06	TRUE	reported	textfile	6378	TRUE	0.00339861	21.7434	20.8705
	rs78575779	G	A	G	A	-0.234076	-0.0403651	0.0286499	0.942827	FALSE	FALSE	FALSE	GVY4Ce	132983703	0.42609	0.0507162	TRUE	reported	textfile	0.0525518	8.42088e-06	TRUE	reported	textfile	6378	TRUE	0.00310102	19.8336	20.8705
	rs952263	T	G	T	G	0.0960714	-0.0107288	0.231638	0.83473	FALSE	FALSE	FALSE	GVY4Ce	52595363	0.734509	0.0316357	TRUE	reported	textfile	0.0209226	4.39555e-06	TRUE	reported	textfile	6378	TRUE	0.00329488	21.0776	20.8705
GCST90199686	rs11681248	T	C	T	C	-0.0861776	-0.0083544	0.629022	0.380372	FALSE	FALSE	FALSE	GVY4Ce	136062506	0.732398	0.0244325	TRUE	reported	textfile	0.01577	4.63824e-08	TRUE	reported	textfile	8153	TRUE	0.00364939	29.8551	26.2762
	rs117276795	A	G	A	G	0.356183	-0.0773175	0.0103757	0.982937	FALSE	FALSE	FALSE	GVY4Ce	72312216	0.385002	0.089002	TRUE	reported	textfile	0.0769361	3.66377e-06	TRUE	reported	textfile	8153	TRUE	0.00262197	21.4279	26.2762
	rs11822621	T	G	T	G	-0.117218	-0.0129459	0.100928	0.94466	FALSE	FALSE	FALSE	GVY4Ce	109342489	0.802374	0.0517265	TRUE	reported	textfile	0.025765	5.37678e-06	TRUE	reported	textfile	8153	TRUE	0.00253227	20.6929	26.2762
	rs1878503	A	G	A	G	0.0695737	0.0377497	0.46355	0.602837	FALSE	FALSE	FALSE	GVY4Ce	72024621	0.118239	0.0241643	TRUE	reported	textfile	0.0155972	8.17115e-06	TRUE	reported	textfile	8153	TRUE	0.00243456	19.8925	26.2762
	rs198260	A	G	A	G	0.22816	0.0582772	0.97371	0.019657	FALSE	FALSE	FALSE	GVY4Ce	56714297	0.494618	0.0853275	TRUE	reported	textfile	0.048609	2.68214e-06	TRUE	reported	textfile	8153	TRUE	0.00269498	22.0262	26.2762
	rs4316784	C	T	C	T	0.0920404	0.0152267	0.826904	0.225965	FALSE	FALSE	FALSE	GVY4Ce	74617721	0.589386	0.0282119	TRUE	reported	textfile	0.0207915	9.56335e-06	TRUE	reported	textfile	8153	TRUE	0.00239787	19.592	26.2762
	rs497768	G	C	G	C	-0.0739761	0.0112485	0.561103	0.549781	FALSE	TRUE	TRUE	GVY4Ce	117880025	0.635151	0.0237065	TRUE	reported	textfile	0.0160037	3.79268e-06	TRUE	reported	textfile	8153	FALSE	0.00261389	21.3617	26.2762
	rs61974973	G	A	G	A	0.132651	0.0473487	0.0761626	0.915796	FALSE	FALSE	FALSE	GVY4Ce	33440005	0.259792	0.0420174	TRUE	reported	textfile	0.0296776	7.83162e-06	TRUE	reported	textfile	8153	TRUE	0.00244446	19.9736	26.2762
	rs6664713	A	C	A	C	0.221278	-0.0803682	0.0247598	0.971879	FALSE	FALSE	FALSE	GVY4Ce	204382965	0.271783	0.0731308	TRUE	reported	textfile	0.0497353	8.6224e-06	TRUE	reported	textfile	8153	TRUE	0.00242201	19.7898	26.2762
	rs76157950	A	G	A	G	0.259172	-0.129919	0.0186095	0.988066	FALSE	FALSE	FALSE	GVY4Ce	94928720	0.231175	0.108507	TRUE	reported	textfile	0.0571721	5.80995e-06	TRUE	reported	textfile	8153	TRUE	0.00251418	20.5448	26.2762
	rs76260755	T	C	T	C	-0.113035	0.0438299	0.110017	0.906763	FALSE	FALSE	FALSE	GVY4Ce	2566507	0.288389	0.0412842	TRUE	reported	textfile	0.0255573	9.74343e-06	TRUE	reported	textfile	8153	TRUE	0.00239352	19.5564	26.2762
	rs80346659	C	G	C	G	-0.223208	0.00421084	0.0253623	0.0409915	FALSE	TRUE	FALSE	GVY4Ce	190587579	0.944712	0.0607202	TRUE	reported	textfile	0.0489983	5.22784e-06	TRUE	reported	textfile	8153	TRUE	0.00253884	20.7468	26.2762
	rs8061485	C	T	C	T	-0.175473	-0.0251847	0.278471	0.706695	FALSE	FALSE	FALSE	GVY4Ce	20463360	0.331802	0.0259505	TRUE	reported	textfile	0.0171848	1.7712e-24	TRUE	reported	textfile	8153	TRUE	0.0126269	104.238	26.2762
	rs853154	C	G	C	G	0.102766	0.0144017	0.156615	0.214051	FALSE	TRUE	FALSE	GVY4Ce	143246483	0.616721	0.0287745	TRUE	reported	textfile	0.0214138	1.59433e-06	TRUE	reported	textfile	8153	TRUE	0.00281688	23.0253	26.2762
	rs9432398	G	A	G	A	0.221475	0.0496284	0.0316989	0.980803	FALSE	FALSE	FALSE	GVY4Ce	94868430	0.552969	0.0836458	TRUE	reported	textfile	0.0445422	6.61795e-07	TRUE	reported	textfile	8153	TRUE	0.00302325	24.7172	26.2762
	rs9565718	A	T	A	T	-0.0847838	-0.00858572	0.630251	0.621033	FALSE	TRUE	FALSE	GVY4Ce	82019296	0.723371	0.0242564	TRUE	reported	textfile	0.0167172	3.94378e-07	TRUE	reported	textfile	8153	TRUE	0.00314495	25.7153	26.2762
	rs9857968	T	C	T	C	0.150356	0.0720741	0.0567903	0.9387	FALSE	FALSE	FALSE	GVY4Ce	185638205	0.135723	0.04831	TRUE	reported	textfile	0.0334056	6.76581e-06	TRUE	reported	textfile	8153	TRUE	0.00247861	20.2533	26.2762
	rs9981680	G	T	G	T	0.169465	0.00500844	0.0427167	0.950884	FALSE	FALSE	FALSE	GVY4Ce	32008646	0.926834	0.0545407	TRUE	reported	textfile	0.0383093	9.70738e-06	TRUE	reported	textfile	8153	TRUE	0.00239438	19.5634	26.2762
GCST90199687	rs11126412	T	A	T	A	0.0812665	-0.0263757	0.222311	0.177417	FALSE	TRUE	FALSE	GVY4Ce	73660507	0.391423	0.0307753	TRUE	reported	textfile	0.0182574	8.54089e-06	TRUE	reported	textfile	8151	TRUE	0.00242482	19.8079	22.0313
	rs111498995	T	A	T	A	0.275959	-0.0189648	0.0168734	0.031438	FALSE	TRUE	FALSE	GVY4Ce	69524538	0.774792	0.0662843	TRUE	reported	textfile	0.0591476	3.07719e-06	TRUE	reported	textfile	8151	TRUE	0.00266346	21.7625	22.0313
	rs139591016	C	T	C	T	-0.244512	0.0276619	0.0203237	0.974448	FALSE	FALSE	FALSE	GVY4Ce	98895019	0.71485	0.0757134	TRUE	reported	textfile	0.0539409	5.81637e-06	TRUE	reported	textfile	8151	TRUE	0.00251455	20.5427	22.0313
	rs145376871	T	G	T	G	-0.246684	-0.01642	0.0191146	0.971094	FALSE	FALSE	FALSE	GVY4Ce	78448608	0.816523	0.0707703	TRUE	reported	textfile	0.0554495	8.6348e-06	TRUE	reported	textfile	8151	TRUE	0.00242227	19.787	22.0313
	rs149656965	T	C	T	C	-0.320596	-0.0823404	0.0120586	0.919859	FALSE	FALSE	FALSE	GVY4Ce	169391708	0.0547243	0.0428619	TRUE	reported	textfile	0.0696557	4.17282e-06	TRUE	reported	textfile	8151	TRUE	0.00259218	21.1786	22.0313
	rs184637108	T	A	T	A	-0.381288	0.131741	0.0078808	0.00548556	FALSE	TRUE	FALSE	GVY4Ce	87970891	0.405722	0.158448	TRUE	reported	textfile	0.0860405	9.35832e-06	TRUE	reported	textfile	8151	TRUE	0.0024035	19.6333	22.0313
	rs2394872	C	A	C	A	-0.121016	-0.00453586	0.0928766	0.917614	FALSE	FALSE	FALSE	GVY4Ce	98583433	0.915037	0.0425156	TRUE	reported	textfile	0.0261549	3.71226e-06	TRUE	reported	textfile	8151	TRUE	0.00261957	21.4029	22.0313
	rs4663135	C	T	C	T	0.0837071	0.0112874	0.784904	0.22673	FALSE	FALSE	FALSE	GVY4Ce	234402679	0.689108	0.0282139	TRUE	reported	textfile	0.018929	9.77159e-06	TRUE	reported	textfile	8151	TRUE	0.00239341	19.5507	22.0313
	rs4783107	C	T	C	T	-0.116779	-0.014879	0.886875	0.112465	FALSE	FALSE	FALSE	GVY4Ce	84962841	0.689041	0.037183	TRUE	reported	textfile	0.0239738	1.10964e-06	TRUE	reported	textfile	8151	TRUE	0.00290257	23.7219	22.0313
	rs535146	A	T	A	T	0.0748445	0.00380032	0.384514	0.340824	FALSE	TRUE	FALSE	GVY4Ce	6939905	0.879555	0.0250791	TRUE	reported	textfile	0.0158705	2.40582e-06	TRUE	reported	textfile	8151	TRUE	0.0027211	22.2347	22.0313
	rs567440118	A	G	A	G	-0.484057	-0.275729	0.00560552	0.994655	FALSE	FALSE	FALSE	GVY4Ce	83001622	0.108045	0.171575	TRUE	reported	textfile	0.102614	2.39029e-06	TRUE	reported	textfile	8151	TRUE	0.00272261	22.2471	22.0313
	rs62381620	G	T	G	T	-0.293756	-0.0419955	0.0304893	0.969901	FALSE	FALSE	FALSE	GVY4Ce	139350290	0.543966	0.0692051	TRUE	reported	textfile	0.0441641	2.90219e-11	TRUE	reported	textfile	8151	TRUE	0.0053985	44.2311	22.0313
	rs647667	C	T	C	T	0.144169	0.0792697	0.0591665	0.954053	FALSE	FALSE	FALSE	GVY4Ce	181416933	0.160218	0.0564463	TRUE	reported	textfile	0.0324617	8.94643e-06	TRUE	reported	textfile	8151	TRUE	0.00241402	19.7194	22.0313
	rs72774956	A	G	A	G	-0.239983	-0.121889	0.0203856	0.977882	FALSE	FALSE	FALSE	GVY4Ce	2830418	0.129813	0.0804635	TRUE	reported	textfile	0.0535446	7.39715e-06	TRUE	reported	textfile	8151	TRUE	0.00245838	20.0827	22.0313
	rs74850022	T	C	T	C	-0.30887	-0.308857	0.0122956	0.996095	FALSE	FALSE	FALSE	GVY4Ce	94667490	0.0840059	0.178747	TRUE	reported	textfile	0.0693354	8.40015e-06	TRUE	reported	textfile	8151	TRUE	0.0024287	19.8397	22.0313
	rs75194109	C	T	C	T	-0.397999	0.0713366	0.00818764	0.961131	FALSE	FALSE	FALSE	GVY4Ce	41679986	0.251325	0.0621867	TRUE	reported	textfile	0.0851016	2.9145e-06	TRUE	reported	textfile	8151	TRUE	0.00267617	21.8666	22.0313
	rs76379749	C	T	C	T	-0.229603	0.226659	0.0217525	0.976729	FALSE	FALSE	FALSE	GVY4Ce	16238488	0.00723936	0.084397	TRUE	reported	textfile	0.0518367	9.45159e-06	TRUE	reported	textfile	8151	TRUE	0.00240118	19.6143	22.0313
	rs76954195	G	C	G	C	0.206021	0.154912	0.028169	0.014366	FALSE	TRUE	FALSE	GVY4Ce	87879048	0.125618	0.101143	TRUE	reported	textfile	0.0459715	7.41237e-06	TRUE	reported	textfile	8151	TRUE	0.00245791	20.0789	22.0313
	rs77181656	T	C	T	C	-0.318701	0.0703221	0.0133923	0.980536	FALSE	FALSE	FALSE	GVY4Ce	11560832	0.393227	0.0823656	TRUE	reported	textfile	0.066826	1.85035e-06	TRUE	reported	textfile	8151	TRUE	0.00278263	22.7389	22.0313
	rs78263978	A	G	A	G	-0.22873	-0.0244919	0.02583	0.971969	FALSE	FALSE	FALSE	GVY4Ce	16795578	0.730947	0.0712251	TRUE	reported	textfile	0.0484595	2.35808e-06	TRUE	reported	textfile	8151	TRUE	0.00272579	22.2732	22.0313
	rs7875568	G	T	G	T	-0.255385	0.00503292	0.0196633	0.949172	FALSE	FALSE	FALSE	GVY4Ce	127750741	0.924832	0.053344	TRUE	reported	textfile	0.0546341	2.94733e-06	TRUE	reported	textfile	8151	TRUE	0.00267356	21.8452	22.0313
	rs78921993	G	A	G	A	-0.129378	-0.0187603	0.07346	0.882212	FALSE	FALSE	FALSE	GVY4Ce	7631167	0.606771	0.0364499	TRUE	reported	textfile	0.0291215	8.88449e-06	TRUE	reported	textfile	8151	TRUE	0.00241564	19.7327	22.0313
	rs7960425	C	G	C	G	0.238798	-0.0416595	0.024852	0.0204203	FALSE	TRUE	FALSE	GVY4Ce	118971939	0.609296	0.0815126	TRUE	reported	textfile	0.0488539	1.01868e-06	TRUE	reported	textfile	8151	TRUE	0.00292268	23.8867	22.0313
	rs80179348	T	A	T	A	-0.319612	0.112596	0.0133227	0.0215354	FALSE	TRUE	FALSE	GVY4Ce	92821947	0.170668	0.0821832	TRUE	reported	textfile	0.066975	1.82303e-06	TRUE	reported	textfile	8151	TRUE	0.00278611	22.7674	22.0313
	rs826459	A	G	A	G	0.0767693	0.00671252	0.70797	0.256459	FALSE	FALSE	FALSE	GVY4Ce	70646994	0.801172	0.0266548	TRUE	reported	textfile	0.017064	6.83005e-06	TRUE	reported	textfile	8151	TRUE	0.002477	20.2352	22.0313
GCST90199688	rs1047891	A	C	A	C	0.381478	-0.00755477	0.307889	0.677969	FALSE	FALSE	FALSE	GVY4Ce	210675783	0.765445	0.0253228	TRUE	reported	textfile	0.0157461	1.16081e-129	TRUE	reported	textfile	8250	TRUE	0.0664188	586.797	45.5023
	rs10757444	A	G	A	G	0.080588	-0.0140001	0.69497	0.357645	FALSE	FALSE	FALSE	GVY4Ce	23661372	0.567963	0.0245162	TRUE	reported	textfile	0.0163581	8.37259e-07	TRUE	reported	textfile	8250	TRUE	0.00293322	24.2644	45.5023
	rs11108842	G	T	G	T	-0.347252	0.0418025	0.00985641	0.99615	FALSE	FALSE	FALSE	GVY4Ce	97145788	0.826505	0.190717	TRUE	reported	textfile	0.0751899	3.86845e-06	TRUE	reported	textfile	8250	TRUE	0.00257867	21.3238	45.5023
	rs11136810	G	C	G	C	0.072029	-0.00761581	0.400543	0.426039	FALSE	TRUE	TRUE	GVY4Ce	4954816	0.748892	0.0237918	TRUE	reported	textfile	0.0152368	2.27522e-06	TRUE	reported	textfile	8250	FALSE	0.00270146	22.342	45.5023
	rs112816924	T	C	T	C	0.275875	0.0746833	0.0153734	0.992193	FALSE	FALSE	FALSE	GVY4Ce	212158947	0.573621	0.132717	TRUE	reported	textfile	0.0608934	5.8859e-06	TRUE	reported	textfile	8250	TRUE	0.00248171	20.5201	45.5023
	rs115090460	T	A	T	A	-0.213667	0.00921095	0.0255581	0.0107271	FALSE	TRUE	FALSE	GVY4Ce	38257980	0.936248	0.115155	TRUE	reported	textfile	0.04776	7.68538e-06	TRUE	reported	textfile	8250	TRUE	0.00242014	20.0097	45.5023
	rs117206739	T	C	T	C	0.23915	0.0523309	0.0202867	0.989789	FALSE	FALSE	FALSE	GVY4Ce	45172745	0.664587	0.120692	TRUE	reported	textfile	0.0531026	6.68267e-06	TRUE	reported	textfile	8250	TRUE	0.00245239	20.277	45.5023
	rs12233751	C	A	C	A	-0.107576	-0.0057199	0.140374	0.892699	FALSE	FALSE	FALSE	GVY4Ce	81933213	0.882021	0.0385418	TRUE	reported	textfile	0.021548	5.96375e-07	TRUE	reported	textfile	8250	TRUE	0.00301199	24.9179	45.5023
	rs141342711	T	C	T	C	0.156311	0.0770569	0.0552779	0.9732	FALSE	FALSE	FALSE	GVY4Ce	20725063	0.292106	0.0731427	TRUE	reported	textfile	0.0326222	1.65503e-06	TRUE	reported	textfile	8250	TRUE	0.00277518	22.9534	45.5023
	rs144831076	C	T	C	T	-0.284047	-0.141576	0.0180032	0.990324	FALSE	FALSE	FALSE	GVY4Ce	103329540	0.238364	0.120073	TRUE	reported	textfile	0.056482	4.93093e-07	TRUE	reported	textfile	8250	TRUE	0.00305617	25.2845	45.5023
	rs151202997	T	G	T	G	0.193942	0.0540219	0.0315572	0.953798	FALSE	FALSE	FALSE	GVY4Ce	47595900	0.337659	0.0563432	TRUE	reported	textfile	0.0427714	5.77718e-06	TRUE	reported	textfile	8250	TRUE	0.002486	20.5557	45.5023
	rs16824802	T	C	T	C	0.0978791	0.0196444	0.201151	0.817268	FALSE	FALSE	FALSE	GVY4Ce	145354897	0.519939	0.0305303	TRUE	reported	textfile	0.0188923	2.20805e-07	TRUE	reported	textfile	8250	TRUE	0.00324299	26.8352	45.5023
	rs2329096	T	C	T	C	0.0709468	-4.45534e-05	0.351672	0.66221	FALSE	FALSE	FALSE	GVY4Ce	78475624	0.998582	0.0250611	TRUE	reported	textfile	0.015894	8.05364e-06	TRUE	reported	textfile	8250	TRUE	0.00240934	19.9202	45.5023
	rs243795	C	T	C	T	0.0882873	0.0054244	0.208481	0.856871	FALSE	FALSE	FALSE	GVY4Ce	54528751	0.870901	0.033378	TRUE	reported	textfile	0.0184131	1.62837e-06	TRUE	reported	textfile	8250	TRUE	0.00277895	22.9846	45.5023
	rs358908	C	T	C	T	-0.0883162	0.00821245	0.258424	0.71157	FALSE	FALSE	FALSE	GVY4Ce	155687953	0.751576	0.0259426	TRUE	reported	textfile	0.0172318	2.97225e-07	TRUE	reported	textfile	8250	TRUE	0.00317384	26.2612	45.5023
	rs4947536	G	C	G	C	-0.0672825	0.0202121	0.499694	0.429746	FALSE	TRUE	TRUE	GVY4Ce	56111673	0.396495	0.0238379	TRUE	reported	textfile	0.0150525	7.82701e-06	TRUE	reported	textfile	8250	FALSE	0.00241592	19.9748	45.5023
	rs596603	G	T	G	T	-0.115999	-0.051343	0.572668	0.445455	FALSE	FALSE	FALSE	GVY4Ce	67592132	0.030297	0.023702	TRUE	reported	textfile	0.0149808	9.69793e-15	TRUE	reported	textfile	8250	TRUE	0.00721506	59.9423	45.5023
	rs62182612	A	G	A	G	-0.0838786	-0.00512006	0.194247	0.69169	FALSE	FALSE	FALSE	GVY4Ce	212238489	0.84028	0.0254053	TRUE	reported	textfile	0.0187414	7.62083e-06	TRUE	reported	textfile	8250	TRUE	0.00242209	20.0259	45.5023
	rs7127777	C	G	C	G	-0.0733441	-0.0173895	0.445641	0.491923	FALSE	TRUE	TRUE	GVY4Ce	122218881	0.462938	0.0236909	TRUE	reported	textfile	0.0154452	2.04763e-06	TRUE	reported	textfile	8250	FALSE	0.00272586	22.5444	45.5023
	rs75446748	C	T	C	T	-0.100817	-0.0774665	0.142724	0.768727	FALSE	FALSE	FALSE	GVY4Ce	34909640	0.00509636	0.0276579	TRUE	reported	textfile	0.0215403	2.86322e-06	TRUE	reported	textfile	8250	TRUE	0.00264825	21.9007	45.5023
	rs76513761	C	T	C	T	0.202404	0.0343555	0.0282572	0.945821	FALSE	FALSE	FALSE	GVY4Ce	135742865	0.505194	0.0515585	TRUE	reported	textfile	0.0452943	7.87172e-06	TRUE	reported	textfile	8250	TRUE	0.00241461	19.9639	45.5023
	rs77976040	C	A	C	A	0.25373	-0.0734511	0.0176413	0.993527	FALSE	FALSE	FALSE	GVY4Ce	66829559	0.627769	0.151486	TRUE	reported	textfile	0.0570551	8.70314e-06	TRUE	reported	textfile	8250	TRUE	0.00239145	19.7719	45.5023
	rs78612075	A	G	A	G	0.271706	0.0557944	0.0158633	0.987559	FALSE	FALSE	FALSE	GVY4Ce	12854868	0.619075	0.112226	TRUE	reported	textfile	0.0604624	6.99641e-06	TRUE	reported	textfile	8250	TRUE	0.00244181	20.1894	45.5023
	rs78829102	A	G	A	G	0.188424	0.126184	0.035272	0.963475	FALSE	FALSE	FALSE	GVY4Ce	36687208	0.0414486	0.0618847	TRUE	reported	textfile	0.0402532	2.85524e-06	TRUE	reported	textfile	8250	TRUE	0.0026489	21.9062	45.5023
	rs9614932	T	C	T	C	-0.101483	-0.00948613	0.143251	0.859698	FALSE	FALSE	FALSE	GVY4Ce	44786685	0.780166	0.0339879	TRUE	reported	textfile	0.0214974	2.35019e-06	TRUE	reported	textfile	8250	TRUE	0.00269395	22.2797	45.5023
	rs9821781	A	G	A	G	0.0826592	8.8335e-05	0.560748	0.419749	FALSE	FALSE	FALSE	GVY4Ce	149644618	0.997055	0.0239284	TRUE	reported	textfile	0.0152654	6.13598e-08	TRUE	reported	textfile	8250	TRUE	0.00354137	29.313	45.5023
GCST90199689	rs11101389	A	T	A	T	-0.0917167	-0.0266476	0.268308	0.252506	FALSE	TRUE	FALSE	GVY4Ce	48579492	0.323997	0.0270184	TRUE	reported	textfile	0.0190277	1.43433e-06	TRUE	reported	textfile	7158	TRUE	0.00323538	23.2275	21.2133
	rs113654354	G	A	G	A	-0.239492	0.0544007	0.024409	0.980951	FALSE	FALSE	FALSE	GVY4Ce	198289969	0.526987	0.0859938	TRUE	reported	textfile	0.054054	9.39685e-06	TRUE	reported	textfile	7158	TRUE	0.00273492	19.6248	21.2133
	rs115887046	C	T	C	T	-0.206093	0.0510715	0.0330149	0.975188	FALSE	FALSE	FALSE	GVY4Ce	18065994	0.50188	0.076052	TRUE	reported	textfile	0.046384	8.8635e-06	TRUE	reported	textfile	7158	TRUE	0.00275044	19.7364	21.2133
	rs118171449	T	C	T	C	0.140008	-0.00639345	0.0767077	0.921799	FALSE	FALSE	FALSE	GVY4Ce	39814174	0.884281	0.0439277	TRUE	reported	textfile	0.031363	8.03933e-06	TRUE	reported	textfile	7158	TRUE	0.00277633	19.9227	21.2133
	rs11817632	A	G	A	G	-0.271521	0.185677	0.0194032	0.986936	FALSE	FALSE	FALSE	GVY4Ce	107699656	0.0735394	0.103761	TRUE	reported	textfile	0.0604452	7.05527e-06	TRUE	reported	textfile	7158	TRUE	0.00281105	20.1726	21.2133
	rs12662646	A	G	A	G	-0.165539	-0.0120351	0.0603497	0.940851	FALSE	FALSE	FALSE	GVY4Ce	105989266	0.804953	0.0487366	TRUE	reported	textfile	0.0347192	1.86115e-06	TRUE	reported	textfile	7158	TRUE	0.00316587	22.7269	21.2133
	rs13405102	G	A	G	A	0.0780611	0.0379503	0.467103	0.463268	FALSE	FALSE	FALSE	GVY4Ce	47022693	0.108409	0.0236393	TRUE	reported	textfile	0.0171532	5.34361e-06	TRUE	reported	textfile	7158	TRUE	0.00288491	20.7042	21.2133
	rs138634970	T	C	T	C	-0.326848	-0.0539543	0.01307	0.979293	FALSE	FALSE	FALSE	GVY4Ce	14557386	0.507069	0.0813289	TRUE	reported	textfile	0.0726276	6.78501e-06	TRUE	reported	textfile	7158	TRUE	0.00282143	20.2473	21.2133
	rs146058026	G	C	G	C	-0.350809	0.0540063	0.0120152	0.0239656	FALSE	TRUE	FALSE	GVY4Ce	37710361	0.494148	0.0789882	TRUE	reported	textfile	0.0764568	4.46812e-06	TRUE	reported	textfile	7158	TRUE	0.00293253	21.0469	21.2133
	rs146355728	T	G	T	G	-0.424019	0.043013	0.00830869	0.977784	FALSE	FALSE	FALSE	GVY4Ce	21042448	0.605323	0.0832358	TRUE	reported	textfile	0.0914518	3.54301e-06	TRUE	reported	textfile	7158	TRUE	0.00299428	21.4914	21.2133
	rs16982178	A	G	A	G	-0.111062	0.00444221	0.143877	0.811175	FALSE	FALSE	FALSE	GVY4Ce	26481497	0.882808	0.0301349	TRUE	reported	textfile	0.0236265	2.5924e-06	TRUE	reported	textfile	7158	TRUE	0.00307753	22.0908	21.2133
	rs1818709	C	G	C	G	-0.0762769	0.0343632	0.453585	0.471865	FALSE	TRUE	TRUE	GVY4Ce	54502079	0.145119	0.0235851	TRUE	reported	textfile	0.0168878	6.28155e-06	TRUE	reported	textfile	7158	FALSE	0.00284192	20.3948	21.2133
	rs187970821	G	A	G	A	-0.36255	-0.0672329	0.0104006	0.98546	FALSE	FALSE	FALSE	GVY4Ce	202289989	0.507845	0.10153	TRUE	reported	textfile	0.0819826	9.7666e-06	TRUE	reported	textfile	7158	TRUE	0.00272468	19.5511	21.2133
	rs296366	C	T	C	T	-0.0945409	0.0251796	0.754105	0.221017	FALSE	FALSE	FALSE	GVY4Ce	47871281	0.38014	0.0286902	TRUE	reported	textfile	0.0194924	1.23367e-06	TRUE	reported	textfile	7158	TRUE	0.00327561	23.5173	21.2133
	rs55971662	T	C	T	C	0.0761508	-0.0129568	0.440459	0.552557	FALSE	FALSE	FALSE	GVY4Ce	240645537	0.585147	0.0237356	TRUE	reported	textfile	0.0170398	7.85848e-06	TRUE	reported	textfile	7158	TRUE	0.00278239	19.9663	21.2133
	rs60850040	C	T	C	T	-0.154409	-0.0315891	0.0656601	0.89065	FALSE	FALSE	FALSE	GVY4Ce	51299783	0.409199	0.0382758	TRUE	reported	textfile	0.0332636	3.4508e-06	TRUE	reported	textfile	7158	TRUE	0.0030013	21.542	21.2133
	rs62052803	C	T	C	T	-0.176732	0.0129594	0.0454737	0.99112	FALSE	FALSE	FALSE	GVY4Ce	22189280	0.916782	0.124027	TRUE	reported	textfile	0.0399741	9.81782e-06	TRUE	reported	textfile	7158	TRUE	0.00272331	19.5412	21.2133
	rs6810998	T	C	T	C	-0.151927	-0.0274776	0.0889636	0.9129	FALSE	FALSE	FALSE	GVY4Ce	139772114	0.511264	0.041831	TRUE	reported	textfile	0.0297616	3.31142e-07	TRUE	reported	textfile	7158	TRUE	0.00362733	26.0517	21.2133
	rs6823721	T	C	T	C	-0.0756087	0.0307106	0.520367	0.38353	FALSE	FALSE	FALSE	GVY4Ce	121651899	0.204711	0.0242151	TRUE	reported	textfile	0.0164302	4.18858e-06	TRUE	reported	textfile	7158	TRUE	0.00294974	21.1708	21.2133
	rs73918203	A	G	A	G	-0.179866	-0.0675763	0.0496689	0.95829	FALSE	FALSE	FALSE	GVY4Ce	22872700	0.259085	0.0598785	TRUE	reported	textfile	0.0388237	3.60609e-06	TRUE	reported	textfile	7158	TRUE	0.00298959	21.4577	21.2133
	rs7629795	A	T	A	T	0.108234	-0.014801	0.864328	0.844632	FALSE	TRUE	FALSE	GVY4Ce	180870396	0.64756	0.0323764	TRUE	reported	textfile	0.0242047	7.76315e-06	TRUE	reported	textfile	7158	TRUE	0.00278564	19.9897	21.2133
	rs7646869	A	C	A	C	-0.0761641	0.0287328	0.383482	0.606737	FALSE	FALSE	FALSE	GVY4Ce	18611927	0.232923	0.0240873	TRUE	reported	textfile	0.0170125	7.57115e-06	TRUE	reported	textfile	7158	TRUE	0.00279228	20.0375	21.2133
	rs77376288	C	T	C	T	0.42291	0.00485846	0.00937194	0.938689	FALSE	FALSE	FALSE	GVY4Ce	80717604	0.922219	0.0497597	TRUE	reported	textfile	0.0866346	1.05259e-06	TRUE	reported	textfile	7158	TRUE	0.00331801	23.8227	21.2133
	rs79407744	A	G	A	G	0.360499	-0.011743	0.0115007	0.996653	FALSE	FALSE	FALSE	GVY4Ce	76983307	0.953549	0.201596	TRUE	reported	textfile	0.0784962	4.37829e-06	TRUE	reported	textfile	7158	TRUE	0.00293793	21.0858	21.2133
GCST90199690	rs10459865	C	T	C	T	0.105994	0.0134033	0.112471	0.863988	FALSE	FALSE	FALSE	GVY4Ce	77083529	0.697004	0.0344233	TRUE	reported	textfile	0.0236672	7.51556e-06	TRUE	reported	textfile	8239	TRUE	0.0024285	20.0523	21.1102
	rs10512739	G	A	G	A	-0.113507	0.0475819	0.0936777	0.956441	FALSE	FALSE	FALSE	GVY4Ce	40431779	0.415533	0.0584404	TRUE	reported	textfile	0.0256877	9.92862e-06	TRUE	reported	textfile	8239	TRUE	0.00236424	19.5204	21.1102
	rs116301309	A	C	A	C	-0.315234	-0.0235613	0.0125152	0.96932	FALSE	FALSE	FALSE	GVY4Ce	205899302	0.73212	0.0688307	TRUE	reported	textfile	0.0672785	2.79271e-06	TRUE	reported	textfile	8239	TRUE	0.00265756	21.9487	21.1102
	rs11688483	G	A	G	A	-0.0751194	0.0115122	0.310804	0.708153	FALSE	FALSE	FALSE	GVY4Ce	152948430	0.653385	0.025636	TRUE	reported	textfile	0.0163022	4.06695e-06	TRUE	reported	textfile	8239	TRUE	0.00257051	21.2279	21.1102
	rs117358502	A	G	A	G	0.193608	0.0304662	0.0320248	0.94529	FALSE	FALSE	FALSE	GVY4Ce	35759681	0.56579	0.0530527	TRUE	reported	textfile	0.0424643	5.13223e-06	TRUE	reported	textfile	8239	TRUE	0.00251669	20.7823	21.1102
	rs12831673	A	G	A	G	0.155271	0.0141593	0.055853	0.956412	FALSE	FALSE	FALSE	GVY4Ce	23205863	0.803623	0.0569423	TRUE	reported	textfile	0.0325321	1.8163e-06	TRUE	reported	textfile	8239	TRUE	0.00275729	22.7746	21.1102
	rs149452470	G	C	G	C	0.268339	-0.0651448	0.0166054	0.0147502	FALSE	TRUE	FALSE	GVY4Ce	174912278	0.503516	0.097381	TRUE	reported	textfile	0.0583171	4.19693e-06	TRUE	reported	textfile	8239	TRUE	0.00256322	21.1675	21.1102
	rs183037566	A	G	A	G	0.352731	0.0140311	0.00997203	0.977045	FALSE	FALSE	FALSE	GVY4Ce	35799865	0.864943	0.0824946	TRUE	reported	textfile	0.0751141	2.65388e-06	TRUE	reported	textfile	8239	TRUE	0.00266937	22.0465	21.1102
	rs2435388	G	A	G	A	-0.0823434	0.00801622	0.765692	0.199169	FALSE	FALSE	FALSE	GVY4Ce	136866289	0.783895	0.0292299	TRUE	reported	textfile	0.0178025	3.73883e-06	TRUE	reported	textfile	8239	TRUE	0.00258997	21.389	21.1102
	rs34922061	A	C	A	C	0.0893043	-0.0837871	0.17996	0.788357	FALSE	FALSE	FALSE	GVY4Ce	81905474	0.00320634	0.0284291	TRUE	reported	textfile	0.0197543	6.1618e-06	TRUE	reported	textfile	8239	TRUE	0.00247441	20.4322	21.1102
	rs57900160	G	C	G	C	-0.0804207	0.00951285	0.257555	0.215388	FALSE	TRUE	FALSE	GVY4Ce	94356953	0.738571	0.0285032	TRUE	reported	textfile	0.0172759	3.23875e-06	TRUE	reported	textfile	8239	TRUE	0.00262325	21.6645	21.1102
	rs62577978	A	G	A	G	-0.0981073	0.0102645	0.138669	0.899066	FALSE	FALSE	FALSE	GVY4Ce	120507275	0.793935	0.0392971	TRUE	reported	textfile	0.0218942	7.43023e-06	TRUE	reported	textfile	8239	TRUE	0.00243116	20.0742	21.1102
	rs77657639	C	A	C	A	0.123886	-0.0493305	0.0789602	0.92292	FALSE	FALSE	FALSE	GVY4Ce	80590631	0.258695	0.0436754	TRUE	reported	textfile	0.0277549	8.06068e-06	TRUE	reported	textfile	8239	TRUE	0.00241236	19.9186	21.1102
	rs79242179	A	G	A	G	-0.329439	-0.0898651	0.0120423	0.994474	FALSE	FALSE	FALSE	GVY4Ce	114110083	0.607297	0.174857	TRUE	reported	textfile	0.0689279	1.75756e-06	TRUE	reported	textfile	8239	TRUE	0.00276492	22.8378	21.1102
	rs9784059	T	C	T	C	-0.148526	-0.0877694	0.0557718	0.968456	FALSE	FALSE	FALSE	GVY4Ce	53494172	0.195686	0.0678311	TRUE	reported	textfile	0.0325498	5.04212e-06	TRUE	reported	textfile	8239	TRUE	0.0025208	20.8163	21.1102
GCST90199691	rs10094039	G	A	G	A	-0.069388	0.00316125	0.622218	0.379632	FALSE	FALSE	FALSE	GVY4Ce	129577430	0.896418	0.0242824	TRUE	reported	textfile	0.0154645	7.22541e-06	TRUE	reported	textfile	8226	TRUE	0.00244144	20.1276	26.7184
	rs10886134	C	A	C	A	0.0673851	0.0250072	0.567596	0.410814	FALSE	FALSE	FALSE	GVY4Ce	117779893	0.29766	0.0240116	TRUE	reported	textfile	0.0151425	8.58469e-06	TRUE	reported	textfile	8226	TRUE	0.00240159	19.7983	26.7184
	rs11133665	A	G	A	G	0.156172	0.00375125	0.291059	0.764828	FALSE	FALSE	FALSE	GVY4Ce	1188170	0.892764	0.0278268	TRUE	reported	textfile	0.0164769	2.58604e-21	TRUE	reported	textfile	8226	TRUE	0.0108031	89.8152	26.7184
	rs12901652	T	C	T	C	0.155465	-0.0247186	0.0484837	0.890609	FALSE	FALSE	FALSE	GVY4Ce	38508928	0.515505	0.0380117	TRUE	reported	textfile	0.0348044	7.93886e-06	TRUE	reported	textfile	8226	TRUE	0.00241967	19.9476	26.7184
	rs140416084	A	G	A	G	-0.12314	0.0420219	0.105825	0.907039	FALSE	FALSE	FALSE	GVY4Ce	246956201	0.298362	0.0404075	TRUE	reported	textfile	0.0242476	3.80516e-07	TRUE	reported	textfile	8226	TRUE	0.00312545	25.7843	26.7184
	rs148226190	G	T	G	T	-0.331065	-0.0645807	0.0116579	0.991399	FALSE	FALSE	FALSE	GVY4Ce	73457377	0.610492	0.126785	TRUE	reported	textfile	0.0702443	2.4404e-06	TRUE	reported	textfile	8226	TRUE	0.00269305	22.2075	26.7184
	rs148357196	T	A	T	A	0.34753	-0.286965	0.00913298	0.000508203	FALSE	TRUE	FALSE	GVY4Ce	58290517	0.592359	0.535962	TRUE	reported	textfile	0.0778149	7.96536e-06	TRUE	reported	textfile	8226	TRUE	0.0024189	19.9413	26.7184
	rs149464341	T	G	T	G	-0.367016	-0.130255	0.00870465	0.988929	FALSE	FALSE	FALSE	GVY4Ce	81969769	0.267942	0.117579	TRUE	reported	textfile	0.0807331	5.46633e-06	TRUE	reported	textfile	8226	TRUE	0.00250604	20.6615	26.7184
	rs1535573	G	A	G	A	-0.0822322	-0.0217336	0.780847	0.29337	FALSE	FALSE	FALSE	GVY4Ce	57602334	0.400849	0.02587	TRUE	reported	textfile	0.0180298	5.09362e-06	TRUE	reported	textfile	8226	TRUE	0.00252241	20.7968	26.7184
	rs1554410	G	T	G	T	0.0680514	-0.0279839	0.438307	0.566029	FALSE	FALSE	FALSE	GVY4Ce	56428517	0.240288	0.0238309	TRUE	reported	textfile	0.015105	6.63026e-06	TRUE	reported	textfile	8226	TRUE	0.00246135	20.2921	26.7184
	rs1670276	C	T	C	T	0.109213	-0.0480253	0.129835	0.842649	FALSE	FALSE	FALSE	GVY4Ce	99073027	0.135032	0.0321337	TRUE	reported	textfile	0.0224365	1.12929e-06	TRUE	reported	textfile	8226	TRUE	0.00287211	23.6882	26.7184
	rs1903860	C	T	C	T	-0.0951231	-0.0751053	0.142707	0.889287	FALSE	FALSE	FALSE	GVY4Ce	87860453	0.0435341	0.0372075	TRUE	reported	textfile	0.0213894	8.69979e-06	TRUE	reported	textfile	8226	TRUE	0.00239852	19.7728	26.7184
	rs1990897	G	T	G	T	0.0781977	0.0176936	0.321116	0.699807	FALSE	FALSE	FALSE	GVY4Ce	115192691	0.492632	0.0257876	TRUE	reported	textfile	0.0159956	1.01505e-06	TRUE	reported	textfile	8226	TRUE	0.00289693	23.8936	26.7184
	rs2218687	A	G	A	G	0.0948989	-0.0341012	0.146767	0.864534	FALSE	FALSE	FALSE	GVY4Ce	103158134	0.32203	0.0344353	TRUE	reported	textfile	0.0214092	9.30903e-06	TRUE	reported	textfile	8226	TRUE	0.00238285	19.6434	26.7184
	rs35042303	T	C	T	C	0.169952	-0.0135293	0.0664537	0.956346	FALSE	FALSE	FALSE	GVY4Ce	52070514	0.812914	0.0571657	TRUE	reported	textfile	0.0300921	1.62586e-08	TRUE	reported	textfile	8226	TRUE	0.00386259	31.8891	26.7184
	rs35285898	C	A	C	A	0.159332	-0.00526879	0.262279	0.822147	FALSE	FALSE	FALSE	GVY4Ce	39399619	0.863724	0.0306975	TRUE	reported	textfile	0.0168676	3.51879e-21	TRUE	reported	textfile	8226	TRUE	0.0107306	89.206	26.7184
	rs4043681	G	A	G	A	0.130261	-0.0137259	0.90818	0.075558	FALSE	FALSE	FALSE	GVY4Ce	24087281	0.755223	0.0440268	TRUE	reported	textfile	0.0260698	5.83352e-07	TRUE	reported	textfile	8226	TRUE	0.00302586	24.9602	26.7184
	rs4686501	G	A	G	A	-0.1202	0.0836451	0.91482	0.07639	FALSE	FALSE	FALSE	GVY4Ce	189158048	0.0589074	0.0442828	TRUE	reported	textfile	0.0266383	6.41325e-06	TRUE	reported	textfile	8226	TRUE	0.00246907	20.3559	26.7184
	rs544646419	G	A	G	A	-0.253741	-0.0359555	0.0178637	0.986587	FALSE	FALSE	FALSE	GVY4Ce	86135840	0.724861	0.102155	TRUE	reported	textfile	0.0563403	6.67718e-06	TRUE	reported	textfile	8226	TRUE	0.00245971	20.2786	26.7184
	rs546649	T	C	T	C	-0.0736867	0.037184	0.428694	0.535393	FALSE	FALSE	FALSE	GVY4Ce	16723935	0.117808	0.0237743	TRUE	reported	textfile	0.0152675	1.39027e-06	TRUE	reported	textfile	8226	TRUE	0.00282375	23.2882	26.7184
	rs56407361	T	C	T	C	0.143585	0.0446619	0.0585443	0.902	FALSE	FALSE	FALSE	GVY4Ce	230901445	0.260816	0.0397183	TRUE	reported	textfile	0.0313911	4.78341e-06	TRUE	reported	textfile	8226	TRUE	0.00253696	20.917	26.7184
	rs6118747	G	A	G	A	-0.0916807	-0.0321567	0.210838	0.878178	FALSE	FALSE	FALSE	GVY4Ce	9834021	0.372564	0.036063	TRUE	reported	textfile	0.0182847	5.32895e-07	TRUE	reported	textfile	8226	TRUE	0.00304696	25.1347	26.7184
	rs61910449	T	C	T	C	-0.179716	-0.0149004	0.0361754	0.945222	FALSE	FALSE	FALSE	GVY4Ce	96704082	0.779091	0.0531202	TRUE	reported	textfile	0.0397708	6.21905e-06	TRUE	reported	textfile	8226	TRUE	0.00247616	20.4145	26.7184
	rs7145174	A	G	A	G	0.167413	-0.0499866	0.0434889	0.974668	FALSE	FALSE	FALSE	GVY4Ce	70820051	0.489946	0.072403	TRUE	reported	textfile	0.0364336	4.32686e-06	TRUE	reported	textfile	8226	TRUE	0.00256019	21.109	26.7184
	rs73154072	G	A	G	A	-0.27116	0.00394792	0.0161842	0.989253	FALSE	FALSE	FALSE	GVY4Ce	26966935	0.972143	0.113054	TRUE	reported	textfile	0.0593007	4.81645e-06	TRUE	reported	textfile	8226	TRUE	0.00253536	20.9038	26.7184
	rs7746774	G	A	G	A	-0.106907	0.00449733	0.144242	0.899093	FALSE	FALSE	FALSE	GVY4Ce	139030342	0.91009	0.0398257	TRUE	reported	textfile	0.021178	4.46461e-07	TRUE	reported	textfile	8226	TRUE	0.00308824	25.4763	26.7184
	rs78654791	G	C	G	C	0.212125	-0.0524667	0.0259158	0.0717515	FALSE	TRUE	FALSE	GVY4Ce	75129988	0.259322	0.0465132	TRUE	reported	textfile	0.0474708	7.87603e-06	TRUE	reported	textfile	8226	TRUE	0.00242153	19.963	26.7184
	rs79479138	T	C	T	C	0.278813	-0.0532763	0.0161908	0.981505	FALSE	FALSE	FALSE	GVY4Ce	1238873	0.555546	0.0903798	TRUE	reported	textfile	0.0594002	2.6817e-06	TRUE	reported	textfile	8226	TRUE	0.00267116	22.0265	26.7184
	rs80220760	G	A	G	A	0.287214	-0.243829	0.015379	0.980025	FALSE	FALSE	FALSE	GVY4Ce	15241783	0.00189627	0.0785022	TRUE	reported	textfile	0.0604881	2.05169e-06	TRUE	reported	textfile	8226	TRUE	0.00273334	22.5406	26.7184
GCST90199692	rs11563055	G	A	G	A	-0.331464	-0.0237604	0.0126074	0.9762	FALSE	FALSE	FALSE	GVY4Ce	233996744	0.752037	0.0752017	TRUE	reported	textfile	0.0744809	8.57394e-06	TRUE	reported	textfile	7125	TRUE	0.002772	19.7998	21.2904
	rs1157094	A	C	A	C	-0.104351	0.0339948	0.819934	0.154678	FALSE	FALSE	FALSE	GVY4Ce	97304894	0.293894	0.0323878	TRUE	reported	textfile	0.0214635	1.16325e-06	TRUE	reported	textfile	7125	TRUE	0.0033065	23.6304	21.2904
	rs116991170	T	C	T	C	0.268336	0.152723	0.0207334	0.984003	FALSE	FALSE	FALSE	GVY4Ce	118935307	0.11575	0.0970984	TRUE	reported	textfile	0.0579862	3.69963e-06	TRUE	reported	textfile	7125	TRUE	0.00299654	21.4085	21.2904
	rs117013417	T	C	T	C	-0.337827	0.0834239	0.0121574	0.989314	FALSE	FALSE	FALSE	GVY4Ce	7133489	0.456937	0.112144	TRUE	reported	textfile	0.075726	8.15089e-06	TRUE	reported	textfile	7125	TRUE	0.0027855	19.8965	21.2904
	rs12055187	A	G	A	G	0.268581	0.0199661	0.0192061	0.956223	FALSE	FALSE	FALSE	GVY4Ce	16725923	0.732401	0.0583921	TRUE	reported	textfile	0.0604753	8.94707e-06	TRUE	reported	textfile	7125	TRUE	0.00276064	19.7184	21.2904
	rs12131960	A	T	A	T	0.0839684	0.0456585	0.270845	0.258832	FALSE	TRUE	FALSE	GVY4Ce	221267758	0.0907967	0.0269975	TRUE	reported	textfile	0.0187574	7.58644e-06	TRUE	reported	textfile	7125	TRUE	0.00280467	20.0339	21.2904
	rs12211905	G	T	G	T	0.0758092	-0.00686016	0.477649	0.455229	FALSE	FALSE	FALSE	GVY4Ce	73748110	0.771983	0.0236736	TRUE	reported	textfile	0.0167419	5.95152e-06	TRUE	reported	textfile	7125	TRUE	0.00286947	20.498	21.2904
	rs12900072	A	G	A	G	0.0775075	-0.0735941	0.462872	0.646838	FALSE	FALSE	FALSE	GVY4Ce	75014807	0.00252575	0.024367	TRUE	reported	textfile	0.0166471	3.2256e-06	TRUE	reported	textfile	7125	TRUE	0.00303324	21.6715	21.2904
	rs141073864	C	T	C	T	0.308909	0.144819	0.0150671	0.97722	FALSE	FALSE	FALSE	GVY4Ce	150052701	0.0658855	0.0787404	TRUE	reported	textfile	0.0687729	7.06492e-06	TRUE	reported	textfile	7125	TRUE	0.00282367	20.1699	21.2904
	rs142847889	G	C	G	C	0.528397	-0.193963	0.00562272	0.00320977	FALSE	TRUE	FALSE	GVY4Ce	34976593	0.344574	0.205216	TRUE	reported	textfile	0.110597	1.77337e-06	TRUE	reported	textfile	7125	TRUE	0.00319345	22.8198	21.2904
	rs148830279	T	C	T	C	-0.43597	-0.109316	0.00725556	0.968341	FALSE	FALSE	FALSE	GVY4Ce	48982240	0.10018	0.0664948	TRUE	reported	textfile	0.0967004	6.53012e-06	TRUE	reported	textfile	7125	TRUE	0.00284469	20.3205	21.2904
	rs17665117	A	T	A	T	0.131321	-0.00270932	0.0895377	0.150051	FALSE	TRUE	FALSE	GVY4Ce	148905721	0.93634	0.0339212	TRUE	reported	textfile	0.029673	9.61721e-06	TRUE	reported	textfile	7125	TRUE	0.00274137	19.5805	21.2904
	rs188517032	G	A	G	A	0.27034	-0.0213193	0.019111	0.955896	FALSE	FALSE	FALSE	GVY4Ce	153753929	0.713829	0.0581352	TRUE	reported	textfile	0.0605876	8.12072e-06	TRUE	reported	textfile	7125	TRUE	0.00278648	19.9036	21.2904
	rs188983534	A	G	A	G	-0.155646	0.00991831	0.0642616	0.945134	FALSE	FALSE	FALSE	GVY4Ce	103709194	0.846881	0.0513639	TRUE	reported	textfile	0.0338062	4.14289e-06	TRUE	reported	textfile	7125	TRUE	0.00296625	21.1915	21.2904
	rs1889899	G	A	G	A	0.0900574	-0.016209	0.381116	0.624464	FALSE	FALSE	FALSE	GVY4Ce	26789942	0.507317	0.0244472	TRUE	reported	textfile	0.0170887	1.36415e-07	TRUE	reported	textfile	7125	TRUE	0.00388281	27.7651	21.2904
	rs221084	T	C	T	C	0.108157	-0.0518118	0.143109	0.88737	FALSE	FALSE	FALSE	GVY4Ce	69484339	0.162505	0.037096	TRUE	reported	textfile	0.0235317	4.30193e-06	TRUE	reported	textfile	7125	TRUE	0.00295619	21.1194	21.2904
	rs2502543	G	A	G	A	-0.0847163	0.00201662	0.270452	0.761829	FALSE	FALSE	FALSE	GVY4Ce	69767427	0.941612	0.0275328	TRUE	reported	textfile	0.0188698	7.138e-06	TRUE	reported	textfile	7125	TRUE	0.0028209	20.1501	21.2904
	rs41281112	T	C	T	C	-0.266851	0.0165162	0.0238865	0.967298	FALSE	FALSE	FALSE	GVY4Ce	99866380	0.803597	0.0664118	TRUE	reported	textfile	0.0539977	7.7369e-07	TRUE	reported	textfile	7125	TRUE	0.00341599	24.4155	21.2904
	rs62180249	T	C	T	C	0.0938403	-0.0484967	0.263858	0.770498	FALSE	FALSE	FALSE	GVY4Ce	211596857	0.0855283	0.0282044	TRUE	reported	textfile	0.0192855	1.13968e-06	TRUE	reported	textfile	7125	TRUE	0.00331201	23.6698	21.2904
	rs72713558	G	A	G	A	-0.129284	-0.0591462	0.0872735	0.892049	FALSE	FALSE	FALSE	GVY4Ce	188410042	0.123069	0.0383564	TRUE	reported	textfile	0.0292191	9.65991e-06	TRUE	reported	textfile	7125	TRUE	0.00274018	19.5719	21.2904
	rs76427286	A	G	A	G	-0.247755	-0.0777877	0.023197	0.947495	FALSE	FALSE	FALSE	GVY4Ce	2677448	0.147434	0.0536965	TRUE	reported	textfile	0.0547662	6.07207e-06	TRUE	reported	textfile	7125	TRUE	0.00286411	20.4596	21.2904
	rs76762532	T	G	T	G	-0.21222	0.0276724	0.0329989	0.972505	FALSE	FALSE	FALSE	GVY4Ce	96681142	0.698678	0.0714854	TRUE	reported	textfile	0.046059	4.07416e-06	TRUE	reported	textfile	7125	TRUE	0.00297075	21.2237	21.2904
	rs79981355	C	T	C	T	-0.12161	-0.0329707	0.11165	0.924249	FALSE	FALSE	FALSE	GVY4Ce	78319900	0.4626	0.0448843	TRUE	reported	textfile	0.0260117	2.93676e-06	TRUE	reported	textfile	7125	TRUE	0.00305834	21.8514	21.2904
	rs80028711	G	A	G	A	0.34128	0.103165	0.0117325	0.988621	FALSE	FALSE	FALSE	GVY4Ce	173119322	0.362218	0.113226	TRUE	reported	textfile	0.0761119	7.32821e-06	TRUE	reported	textfile	7125	TRUE	0.0028139	20.0999	21.2904
GCST90199693	rs10445235	T	C	T	C	0.0823205	-0.0692739	0.761006	0.203327	FALSE	FALSE	FALSE	GVY4Ce	74264155	0.0174699	0.0291475	TRUE	reported	textfile	0.017876	4.12281e-06	TRUE	reported	textfile	8239	TRUE	0.00256735	21.2017	30.9922
	rs11052064	C	T	C	T	0.145747	-0.0575865	0.0554543	0.967064	FALSE	FALSE	FALSE	GVY4Ce	32548263	0.379324	0.065503	TRUE	reported	textfile	0.0327583	8.62104e-06	TRUE	reported	textfile	8239	TRUE	0.00239684	19.7902	30.9922
	rs111528473	A	G	A	G	0.403688	0.108225	0.00730105	0.977742	FALSE	FALSE	FALSE	GVY4Ce	37702057	0.179519	0.0806304	TRUE	reported	textfile	0.0884272	4.99021e-06	TRUE	reported	textfile	8239	TRUE	0.00252318	20.836	30.9922
	rs114537113	T	C	T	C	-0.330467	0.0477123	0.0114546	0.959048	FALSE	FALSE	FALSE	GVY4Ce	9706991	0.442212	0.0620879	TRUE	reported	textfile	0.071325	3.59954e-06	TRUE	reported	textfile	8239	TRUE	0.00259877	21.4619	30.9922
	rs12453818	G	A	G	A	0.0764897	-0.00351906	0.703012	0.407953	FALSE	FALSE	FALSE	GVY4Ce	8931278	0.883345	0.0239832	TRUE	reported	textfile	0.0169153	6.1277e-06	TRUE	reported	textfile	8239	TRUE	0.00247569	20.4428	30.9922
	rs144727225	T	C	T	C	-0.225369	0.0821142	0.0236938	0.985049	FALSE	FALSE	FALSE	GVY4Ce	82629961	0.402144	0.098012	TRUE	reported	textfile	0.0493589	4.97295e-06	TRUE	reported	textfile	8239	TRUE	0.00252398	20.8426	30.9922
	rs148758368	T	A	T	A	0.370269	0.156829	0.00863747	0.00127858	FALSE	TRUE	FALSE	GVY4Ce	22738936	0.628698	0.32432	TRUE	reported	textfile	0.0808217	4.62085e-06	TRUE	reported	textfile	8239	TRUE	0.00254097	20.9833	30.9922
	rs28415528	A	G	A	G	-0.209871	0.00792266	0.317899	0.729784	FALSE	FALSE	FALSE	GVY4Ce	151907285	0.764476	0.0264434	TRUE	reported	textfile	0.016024	3.41299e-39	TRUE	reported	textfile	8239	TRUE	0.0203957	171.497	30.9922
	rs299647	C	T	C	T	-0.0858123	-0.0115358	0.20984	0.813887	FALSE	FALSE	FALSE	GVY4Ce	12497739	0.703722	0.0303334	TRUE	reported	textfile	0.0185046	3.52889e-06	TRUE	reported	textfile	8239	TRUE	0.00260335	21.4998	30.9922
	rs488485	C	T	C	T	-0.0943596	-0.00269104	0.841825	0.106437	FALSE	FALSE	FALSE	GVY4Ce	116412455	0.943425	0.0379201	TRUE	reported	textfile	0.0211094	7.82067e-06	TRUE	reported	textfile	8239	TRUE	0.00241932	19.9763	30.9922
	rs59627096	G	A	G	A	-0.0943227	-0.0138867	0.161978	0.805478	FALSE	FALSE	FALSE	GVY4Ce	109665263	0.639365	0.0296353	TRUE	reported	textfile	0.0206078	4.71619e-06	TRUE	reported	textfile	8239	TRUE	0.00253625	20.9442	30.9922
	rs6844622	G	C	G	C	-0.0711572	-0.0126228	0.580469	0.602641	FALSE	TRUE	FALSE	GVY4Ce	56743629	0.598829	0.0239938	TRUE	reported	textfile	0.0154677	4.21745e-06	TRUE	reported	textfile	8239	TRUE	0.00256211	21.1583	30.9922
	rs80144245	C	T	C	T	-0.208918	-0.0479995	0.032466	0.957647	FALSE	FALSE	FALSE	GVY4Ce	96792319	0.412277	0.0585436	TRUE	reported	textfile	0.0425154	8.9268e-07	TRUE	reported	textfile	8239	TRUE	0.00292223	24.1409	30.9922
	rs9530666	C	A	C	A	-0.0689846	-0.00564689	0.533242	0.463773	FALSE	FALSE	FALSE	GVY4Ce	77482029	0.811344	0.0236576	TRUE	reported	textfile	0.015239	5.98731e-06	TRUE	reported	textfile	8239	TRUE	0.00248106	20.4874	30.9922
	rs9603710	G	T	G	T	-0.066296	-0.0389261	0.512044	0.514498	FALSE	FALSE	FALSE	GVY4Ce	40254891	0.0986143	0.0235686	TRUE	reported	textfile	0.0149651	9.42146e-06	TRUE	reported	textfile	8239	TRUE	0.00237633	19.6205	30.9922
GCST90199694	rs10194878	C	T	C	T	0.0873181	0.0480982	0.283293	0.740925	FALSE	FALSE	FALSE	GVY4Ce	138639888	0.0732285	0.0268495	TRUE	reported	textfile	0.0182519	1.71797e-06	TRUE	reported	textfile	7444	TRUE	0.00306516	22.881	22.652
	rs1033930	T	G	T	G	0.0813366	-0.0260564	0.663938	0.442512	FALSE	FALSE	FALSE	GVY4Ce	29875471	0.272114	0.0237263	TRUE	reported	textfile	0.0174666	3.21324e-06	TRUE	reported	textfile	7444	TRUE	0.0029046	21.679	22.652
	rs11101870	T	C	T	C	-0.120114	-0.075913	0.152488	0.830287	FALSE	FALSE	FALSE	GVY4Ce	133589198	0.0156203	0.0313993	TRUE	reported	textfile	0.0228253	1.4226e-07	TRUE	reported	textfile	7444	TRUE	0.00370626	27.6846	22.652
	rs11235978	A	G	A	G	0.127658	0.0617637	0.0926578	0.908249	FALSE	FALSE	FALSE	GVY4Ce	74024780	0.129105	0.0406972	TRUE	reported	textfile	0.0281119	5.59713e-06	TRUE	reported	textfile	7444	TRUE	0.00276254	20.6157	22.652
	rs11599254	T	C	T	C	0.130505	-0.0387175	0.0850791	0.879836	FALSE	FALSE	FALSE	GVY4Ce	28929032	0.285998	0.0362883	TRUE	reported	textfile	0.0293659	8.8256e-06	TRUE	reported	textfile	7444	TRUE	0.00264613	19.7447	22.652
	rs117238703	G	T	G	T	-0.224046	-0.223348	0.0275347	0.99173	FALSE	FALSE	FALSE	GVY4Ce	99642289	0.086808	0.130424	TRUE	reported	textfile	0.0503738	8.68046e-06	TRUE	reported	textfile	7444	TRUE	0.00265037	19.7764	22.652
	rs12855367	G	A	G	A	0.115901	-0.0181185	0.12214	0.848301	FALSE	FALSE	FALSE	GVY4Ce	20173700	0.579382	0.0326879	TRUE	reported	textfile	0.02495	3.39529e-06	TRUE	reported	textfile	7444	TRUE	0.00289048	21.5733	22.652
	rs138045396	A	G	A	G	0.199454	-0.146418	0.0350913	0.960085	FALSE	FALSE	FALSE	GVY4Ce	28561889	0.0165272	0.0610822	TRUE	reported	textfile	0.044885	8.84358e-06	TRUE	reported	textfile	7444	TRUE	0.00264561	19.7409	22.652
	rs1388107	T	G	T	G	-0.105876	0.0159253	0.138735	0.918125	FALSE	FALSE	FALSE	GVY4Ce	119573311	0.709419	0.0427368	TRUE	reported	textfile	0.0236541	7.60496e-06	TRUE	reported	textfile	7444	TRUE	0.00268416	20.0293	22.652
	rs143167061	T	C	T	C	-0.2654	-0.0451249	0.0193422	0.981994	FALSE	FALSE	FALSE	GVY4Ce	13186904	0.607469	0.0878447	TRUE	reported	textfile	0.0595893	8.43536e-06	TRUE	reported	textfile	7444	TRUE	0.00265768	19.8312	22.652
	rs143552547	A	G	A	G	-0.178534	-0.00222831	0.0441276	0.972045	FALSE	FALSE	FALSE	GVY4Ce	34518968	0.974906	0.0708388	TRUE	reported	textfile	0.0396907	6.85529e-06	TRUE	reported	textfile	7444	TRUE	0.00271069	20.2278	22.652
	rs188985963	T	C	T	C	0.511207	-0.0278099	0.00588633	0.988112	FALSE	FALSE	FALSE	GVY4Ce	56704677	0.805219	0.112774	TRUE	reported	textfile	0.107882	2.15233e-06	TRUE	reported	textfile	7444	TRUE	0.00300733	22.4481	22.652
	rs205788	T	C	T	C	-0.0972257	0.00645299	0.792873	0.22953	FALSE	FALSE	FALSE	GVY4Ce	57794868	0.817798	0.0280105	TRUE	reported	textfile	0.0210377	3.8098e-06	TRUE	reported	textfile	7444	TRUE	0.00286098	21.3525	22.652
	rs226220	G	A	G	A	0.130753	0.0045446	0.889334	0.124267	FALSE	FALSE	FALSE	GVY4Ce	38874390	0.898618	0.0356696	TRUE	reported	textfile	0.0261663	5.82303e-07	TRUE	reported	textfile	7444	TRUE	0.00334317	24.9633	22.652
	rs28452143	G	A	G	A	0.0773975	0.0131764	0.63166	0.349564	FALSE	FALSE	FALSE	GVY4Ce	1194472	0.593659	0.0246961	TRUE	reported	textfile	0.0170037	5.31921e-06	TRUE	reported	textfile	7444	TRUE	0.00277558	20.7133	22.652
	rs35094757	G	A	G	A	-0.31092	0.0930963	0.014158	0.983664	FALSE	FALSE	FALSE	GVY4Ce	73963515	0.321916	0.0939866	TRUE	reported	textfile	0.0698636	8.57152e-06	TRUE	reported	textfile	7444	TRUE	0.0026536	19.8006	22.652
	rs57238734	C	A	C	A	-0.319455	-0.0558932	0.0133351	0.987926	FALSE	FALSE	FALSE	GVY4Ce	7568135	0.591711	0.104209	TRUE	reported	textfile	0.0716983	8.36823e-06	TRUE	reported	textfile	7444	TRUE	0.00265974	19.8465	22.652
	rs6859899	G	A	G	A	-0.10352	0.0388155	0.157066	0.810572	FALSE	FALSE	FALSE	GVY4Ce	58612645	0.197337	0.0301088	TRUE	reported	textfile	0.0224663	4.0702e-06	TRUE	reported	textfile	7444	TRUE	0.00284408	21.226	22.652
	rs7038710	G	A	G	A	-0.282261	0.11598	0.0228741	0.981491	FALSE	FALSE	FALSE	GVY4Ce	107718105	0.175948	0.0856992	TRUE	reported	textfile	0.0546831	2.44633e-07	TRUE	reported	textfile	7444	TRUE	0.00356646	26.6366	22.652
	rs7091698	A	G	A	G	0.102016	-0.0200438	0.153689	0.881794	FALSE	FALSE	FALSE	GVY4Ce	14812506	0.584441	0.0366493	TRUE	reported	textfile	0.0230217	9.36743e-06	TRUE	reported	textfile	7444	TRUE	0.00263094	19.6311	22.652
	rs72712651	C	T	C	T	-0.215519	0.0152414	0.030274	0.988241	FALSE	FALSE	FALSE	GVY4Ce	26048982	0.890424	0.110631	TRUE	reported	textfile	0.0480665	7.33386e-06	TRUE	reported	textfile	7444	TRUE	0.00269345	20.0988	22.652
	rs72818634	A	G	A	G	-0.112169	0.0590062	0.129326	0.863278	FALSE	FALSE	FALSE	GVY4Ce	179204735	0.0821032	0.0339386	TRUE	reported	textfile	0.0248028	6.11378e-06	TRUE	reported	textfile	7444	TRUE	0.00273997	20.4469	22.652
	rs72868316	A	G	A	G	0.342008	0.0318611	0.0292732	0.977091	FALSE	FALSE	FALSE	GVY4Ce	133391165	0.695787	0.0814832	TRUE	reported	textfile	0.0487503	2.29104e-12	TRUE	reported	textfile	7444	TRUE	0.00656825	49.2041	22.652
	rs7699259	A	G	A	G	0.0805936	-0.0508472	0.472503	0.539747	FALSE	FALSE	FALSE	GVY4Ce	32221352	0.0319213	0.0237006	TRUE	reported	textfile	0.0166295	1.2571e-06	TRUE	reported	textfile	7444	TRUE	0.00314534	23.4815	22.652
	rs78018441	A	G	A	G	-0.164796	-0.0658815	0.0605772	0.953184	FALSE	FALSE	FALSE	GVY4Ce	6461406	0.232975	0.055236	TRUE	reported	textfile	0.0345099	1.79403e-06	TRUE	reported	textfile	7444	TRUE	0.00305402	22.7976	22.652
	rs78121311	G	T	G	T	-0.203071	0.00706448	0.039261	0.960696	FALSE	FALSE	FALSE	GVY4Ce	103812795	0.90717	0.0605826	TRUE	reported	textfile	0.0427853	2.07207e-06	TRUE	reported	textfile	7444	TRUE	0.00301709	22.5211	22.652
GCST90199695	rs10965244	T	A	T	A	0.0909597	0.0514049	0.21717	0.282466	FALSE	TRUE	FALSE	GVY4Ce	22130390	0.051233	0.026368	TRUE	reported	textfile	0.0197553	4.13827e-06	TRUE	reported	textfile	7518	TRUE	0.00281194	21.1941	24.2123
	rs114843083	A	C	A	C	-0.27591	-0.0991875	0.0184418	0.99434	FALSE	FALSE	FALSE	GVY4Ce	55929641	0.512971	0.151612	TRUE	reported	textfile	0.0596858	3.78756e-06	TRUE	reported	textfile	7518	TRUE	0.00283438	21.3637	24.2123
	rs11668541	A	G	A	G	0.25389	-0.121785	0.0217245	0.975782	FALSE	FALSE	FALSE	GVY4Ce	20010644	0.120544	0.0784448	TRUE	reported	textfile	0.0552438	4.3108e-06	TRUE	reported	textfile	7518	TRUE	0.00280158	21.1158	24.2123
	rs116885105	A	T	A	T	-0.224184	0.00480285	0.0301982	0.0565548	FALSE	TRUE	FALSE	GVY4Ce	4500213	0.926056	0.05175	TRUE	reported	textfile	0.0476035	2.48454e-06	TRUE	reported	textfile	7518	TRUE	0.00294137	22.1726	24.2123
	rs118097128	T	A	T	A	-0.202653	-0.142356	0.0369848	0.0239702	FALSE	TRUE	FALSE	GVY4Ce	71217969	0.0619726	0.076269	TRUE	reported	textfile	0.0427349	2.11518e-06	TRUE	reported	textfile	7518	TRUE	0.00298223	22.4815	24.2123
	rs144166724	T	C	T	C	-0.424108	-0.151151	0.00891421	0.976225	FALSE	FALSE	FALSE	GVY4Ce	82053788	0.0518621	0.0777417	TRUE	reported	textfile	0.085763	7.60954e-07	TRUE	reported	textfile	7518	TRUE	0.0032422	24.4477	24.2123
	rs144275620	T	C	T	C	0.35433	-0.0884151	0.0101946	0.970589	FALSE	FALSE	FALSE	GVY4Ce	178039614	0.220472	0.0721595	TRUE	reported	textfile	0.0790411	7.36518e-06	TRUE	reported	textfile	7518	TRUE	0.00266593	20.0907	24.2123
	rs1446585	G	A	G	A	-0.121817	0.00459048	0.322523	0.655708	FALSE	FALSE	FALSE	GVY4Ce	135649909	0.854654	0.0250594	TRUE	reported	textfile	0.0166585	2.61978e-13	TRUE	reported	textfile	7518	TRUE	0.00706258	53.4599	24.2123
	rs16956661	C	G	C	G	-0.16477	-0.0890802	0.0713328	0.0883737	FALSE	TRUE	FALSE	GVY4Ce	72278241	0.0318456	0.0415032	TRUE	reported	textfile	0.0310171	1.08296e-07	TRUE	reported	textfile	7518	TRUE	0.00373959	28.2123	24.2123
	rs187521737	A	G	A	G	0.441771	0.0214081	0.00691832	0.99815	FALSE	FALSE	FALSE	GVY4Ce	3565143	0.938644	0.278119	TRUE	reported	textfile	0.0972829	5.59642e-06	TRUE	reported	textfile	7518	TRUE	0.00273545	20.6161	24.2123
	rs4668098	G	A	G	A	0.0932	0.0367128	0.811002	0.204101	FALSE	FALSE	FALSE	GVY4Ce	168690200	0.214995	0.0296084	TRUE	reported	textfile	0.0205822	5.94939e-06	TRUE	reported	textfile	7518	TRUE	0.00271996	20.499	24.2123
	rs55947356	A	G	A	G	-0.532189	0.0619834	0.00533903	0.997247	FALSE	FALSE	FALSE	GVY4Ce	156264075	0.773172	0.21505	TRUE	reported	textfile	0.110189	1.36676e-06	TRUE	reported	textfile	7518	TRUE	0.0030932	23.3206	24.2123
	rs6701658	G	A	G	A	-0.155143	0.01248	0.0589528	0.941866	FALSE	FALSE	FALSE	GVY4Ce	99961422	0.805774	0.0507563	TRUE	reported	textfile	0.0337346	4.24655e-06	TRUE	reported	textfile	7518	TRUE	0.00280537	21.1445	24.2123
	rs73136572	C	T	C	T	0.177296	0.00638422	0.0445703	0.907567	FALSE	FALSE	FALSE	GVY4Ce	63923460	0.87679	0.0411779	TRUE	reported	textfile	0.0385336	4.20303e-06	TRUE	reported	textfile	7518	TRUE	0.00280799	21.1643	24.2123
	rs75684329	A	T	A	T	-0.164546	0.051699	0.0630576	0.0748929	FALSE	TRUE	FALSE	GVY4Ce	9404705	0.249451	0.0448899	TRUE	reported	textfile	0.033017	6.239e-07	TRUE	reported	textfile	7518	TRUE	0.0032928	24.8304	24.2123
	rs78414202	A	G	A	G	-0.38065	0.012367	0.00961795	0.998508	FALSE	FALSE	FALSE	GVY4Ce	96102778	0.967037	0.299267	TRUE	reported	textfile	0.0824987	3.94971e-06	TRUE	reported	textfile	7518	TRUE	0.00282376	21.2834	24.2123
GCST90199696	rs10088682	T	C	T	C	0.0694216	-0.0211044	0.458222	0.526012	FALSE	FALSE	FALSE	GVY4Ce	58287443	0.370997	0.0235907	TRUE	reported	textfile	0.015521	7.72241e-06	TRUE	reported	textfile	8272	TRUE	0.00241263	20.0007	21.6216
	rs114830966	A	G	A	G	-0.375581	0.48551	0.0103465	0.994297	FALSE	FALSE	FALSE	GVY4Ce	74384420	0.00722038	0.180722	TRUE	reported	textfile	0.0769197	1.04609e-06	TRUE	reported	textfile	8272	TRUE	0.0028739	23.8357	21.6216
	rs115146351	A	G	A	G	-0.147385	0.145453	0.0596598	0.971805	FALSE	FALSE	FALSE	GVY4Ce	121657784	0.0387356	0.0703697	TRUE	reported	textfile	0.0328319	7.1528e-06	TRUE	reported	textfile	8272	TRUE	0.00243023	20.147	21.6216
	rs115151170	C	T	C	T	-0.338886	-0.105207	0.0115656	0.994426	FALSE	FALSE	FALSE	GVY4Ce	54906289	0.507667	0.158809	TRUE	reported	textfile	0.0722547	2.72995e-06	TRUE	reported	textfile	8272	TRUE	0.00265223	21.9923	21.6216
	rs115520044	A	G	A	G	0.296117	-0.0374773	0.0166484	0.989953	FALSE	FALSE	FALSE	GVY4Ce	49488289	0.759142	0.122232	TRUE	reported	textfile	0.0603473	9.2531e-07	TRUE	reported	textfile	8272	TRUE	0.00290227	24.0717	21.6216
	rs115558877	G	A	G	A	0.283083	0.0419353	0.0162034	0.973276	FALSE	FALSE	FALSE	GVY4Ce	22251216	0.566611	0.0731792	TRUE	reported	textfile	0.0606415	3.03925e-06	TRUE	reported	textfile	8272	TRUE	0.00262745	21.7863	21.6216
	rs116020639	C	T	C	T	-0.277233	-0.113703	0.0157971	0.995027	FALSE	FALSE	FALSE	GVY4Ce	64880349	0.489632	0.164574	TRUE	reported	textfile	0.0620127	7.80092e-06	TRUE	reported	textfile	8272	TRUE	0.00241029	19.9813	21.6216
	rs117187192	A	G	A	G	-0.197012	0.0206939	0.0326366	0.98081	FALSE	FALSE	FALSE	GVY4Ce	155825162	0.813841	0.0878821	TRUE	reported	textfile	0.0437787	6.78949e-06	TRUE	reported	textfile	8272	TRUE	0.00244223	20.2467	21.6216
	rs117728044	G	A	G	A	-0.259555	0.0813783	0.0188714	0.966585	FALSE	FALSE	FALSE	GVY4Ce	39575423	0.214647	0.0655807	TRUE	reported	textfile	0.0570087	5.29086e-06	TRUE	reported	textfile	8272	TRUE	0.00249965	20.7239	21.6216
	rs118074685	C	T	C	T	0.172201	-0.0304784	0.0510204	0.982676	FALSE	FALSE	FALSE	GVY4Ce	35080621	0.732379	0.0891275	TRUE	reported	textfile	0.0346761	6.83523e-07	TRUE	reported	textfile	8272	TRUE	0.0029724	24.655	21.6216
	rs1594297	A	G	A	G	0.243317	-0.00986266	0.974151	0.033525	FALSE	FALSE	FALSE	GVY4Ce	16476976	0.879568	0.0650931	TRUE	reported	textfile	0.0498295	1.04486e-06	TRUE	reported	textfile	8272	TRUE	0.00287416	23.8378	21.6216
	rs1601568	T	A	T	A	0.104566	-0.012755	0.85011	0.882974	FALSE	TRUE	FALSE	GVY4Ce	131433569	0.72718	0.03656	TRUE	reported	textfile	0.0213989	1.02644e-06	TRUE	reported	textfile	8272	TRUE	0.0028783	23.8722	21.6216
	rs345471	A	G	A	G	-0.0730759	-0.00731879	0.661226	0.479873	FALSE	FALSE	FALSE	GVY4Ce	91758624	0.757028	0.0236559	TRUE	reported	textfile	0.016223	6.65398e-06	TRUE	reported	textfile	8272	TRUE	0.00244687	20.2853	21.6216
	rs3849062	G	A	G	A	-0.0770005	-0.00461315	0.301836	0.652663	FALSE	FALSE	FALSE	GVY4Ce	126038191	0.851897	0.0247092	TRUE	reported	textfile	0.0169027	5.22598e-06	TRUE	reported	textfile	8272	TRUE	0.00250251	20.7477	21.6216
	rs45603636	A	G	A	G	-0.392277	0.0624102	0.0102711	0.962498	FALSE	FALSE	FALSE	GVY4Ce	43623319	0.310452	0.0615319	TRUE	reported	textfile	0.0769037	3.38053e-07	TRUE	reported	textfile	8272	TRUE	0.00313557	26.0127	21.6216
	rs4848147	A	G	A	G	-0.0712734	0.036287	0.377018	0.615431	FALSE	FALSE	FALSE	GVY4Ce	121197584	0.137061	0.0244057	TRUE	reported	textfile	0.0158212	6.63993e-06	TRUE	reported	textfile	8272	TRUE	0.00244738	20.2895	21.6216
	rs4856225	T	C	T	C	0.0867398	-0.0686227	0.795048	0.145593	FALSE	FALSE	FALSE	GVY4Ce	79930958	0.0390751	0.0332571	TRUE	reported	textfile	0.0191329	5.8002e-06	TRUE	reported	textfile	8272	TRUE	0.00247849	20.548	21.6216
	rs59603647	G	C	G	C	0.0976318	0.00617739	0.158436	0.186307	FALSE	TRUE	FALSE	GVY4Ce	77623124	0.83775	0.0301671	TRUE	reported	textfile	0.0214455	5.29969e-06	TRUE	reported	textfile	8272	TRUE	0.00249927	20.7207	21.6216
	rs61419985	C	T	C	T	-0.333293	-0.0647396	0.0105881	0.993858	FALSE	FALSE	FALSE	GVY4Ce	232984793	0.674092	0.153945	TRUE	reported	textfile	0.0747585	8.2628e-06	TRUE	reported	textfile	8272	TRUE	0.00239706	19.8713	21.6216
	rs62246138	A	G	A	G	-0.208306	-0.057804	0.0322933	0.968269	FALSE	FALSE	FALSE	GVY4Ce	46412462	0.382282	0.06616	TRUE	reported	textfile	0.0441862	2.42575e-06	TRUE	reported	textfile	8272	TRUE	0.0026795	22.219	21.6216
	rs6909263	A	G	A	G	0.0696963	-0.000160601	0.432108	0.596948	FALSE	FALSE	FALSE	GVY4Ce	1326892	0.994656	0.0239804	TRUE	reported	textfile	0.0156089	8.00082e-06	TRUE	reported	textfile	8272	TRUE	0.00240447	19.9329	21.6216
	rs73328382	A	C	A	C	-0.470821	-0.0996371	0.00587879	0.933321	FALSE	FALSE	FALSE	GVY4Ce	99422751	0.0362126	0.0475701	TRUE	reported	textfile	0.101083	3.19674e-06	TRUE	reported	textfile	8272	TRUE	0.00261582	21.6895	21.6216
	rs75166338	G	A	G	A	-0.333795	0.0978553	0.0109104	0.995324	FALSE	FALSE	FALSE	GVY4Ce	125085932	0.55667	0.166479	TRUE	reported	textfile	0.0733501	5.34651e-06	TRUE	reported	textfile	8272	TRUE	0.00249725	20.704	21.6216
	rs75972606	C	T	C	T	0.208073	0.00831408	0.0285056	0.924759	FALSE	FALSE	FALSE	GVY4Ce	192328051	0.854921	0.0454712	TRUE	reported	textfile	0.0462893	6.9548e-06	TRUE	reported	textfile	8272	TRUE	0.00243669	20.2006	21.6216
	rs77535466	C	A	C	A	-0.285605	0.0299549	0.0162774	0.968925	FALSE	FALSE	FALSE	GVY4Ce	93079228	0.659561	0.0679991	TRUE	reported	textfile	0.060652	2.49049e-06	TRUE	reported	textfile	8272	TRUE	0.00267343	22.1685	21.6216
GCST90199697	rs11070743	T	C	T	C	0.0721838	-0.0253018	0.578776	0.366012	FALSE	FALSE	FALSE	GVY4Ce	50058487	0.302061	0.0245167	TRUE	reported	textfile	0.0153097	2.4181e-06	TRUE	reported	textfile	8240	TRUE	0.0026906	22.2249	23.3352
	rs1126743	A	G	A	G	0.136271	-0.0153909	0.791893	0.228839	FALSE	FALSE	FALSE	GVY4Ce	46930301	0.582349	0.0279857	TRUE	reported	textfile	0.0185101	1.81245e-13	TRUE	reported	textfile	8240	TRUE	0.00653454	54.1856	23.3352
	rs114733295	T	G	T	G	0.278693	0.140064	0.0156079	0.998023	FALSE	FALSE	FALSE	GVY4Ce	56324014	0.591013	0.260648	TRUE	reported	textfile	0.0604881	4.07714e-06	TRUE	reported	textfile	8240	TRUE	0.00256961	21.223	23.3352
	rs12662092	A	G	A	G	0.0970377	-0.0402496	0.153963	0.827514	FALSE	FALSE	FALSE	GVY4Ce	147991761	0.199698	0.0313858	TRUE	reported	textfile	0.020626	2.54331e-06	TRUE	reported	textfile	8240	TRUE	0.00267891	22.1282	23.3352
	rs13070262	T	C	T	C	-0.0810322	-0.00219113	0.231974	0.789412	FALSE	FALSE	FALSE	GVY4Ce	54784197	0.939943	0.0290828	TRUE	reported	textfile	0.0181387	7.91858e-06	TRUE	reported	textfile	8240	TRUE	0.00241616	19.9525	23.3352
	rs146947505	A	G	A	G	0.287105	-0.0456961	0.0162592	0.981065	FALSE	FALSE	FALSE	GVY4Ce	117586522	0.621896	0.0926588	TRUE	reported	textfile	0.0585823	9.5409e-07	TRUE	reported	textfile	8240	TRUE	0.00290641	24.0128	23.3352
	rs148536062	C	G	C	G	-0.291786	-0.00244277	0.0145678	0.0113102	FALSE	TRUE	FALSE	GVY4Ce	56465194	0.982491	0.111308	TRUE	reported	textfile	0.0623865	2.91002e-06	TRUE	reported	textfile	8240	TRUE	0.0026477	21.8697	23.3352
	rs184688493	A	C	A	C	0.181186	0.0672909	0.0451641	0.966477	FALSE	FALSE	FALSE	GVY4Ce	76715970	0.302688	0.0652875	TRUE	reported	textfile	0.0359985	4.82502e-07	TRUE	reported	textfile	8240	TRUE	0.00306493	25.3265	23.3352
	rs192475369	T	A	T	A	0.269888	0.0400988	0.0167687	0.0183625	FALSE	TRUE	FALSE	GVY4Ce	33552509	0.652483	0.089046	TRUE	reported	textfile	0.0575722	2.76128e-06	TRUE	reported	textfile	8240	TRUE	0.00265985	21.9703	23.3352
	rs2351032	A	G	A	G	-0.0714967	0.00654691	0.478607	0.485538	FALSE	FALSE	FALSE	GVY4Ce	77423138	0.78168	0.023624	TRUE	reported	textfile	0.0151331	2.3065e-06	TRUE	reported	textfile	8240	TRUE	0.00270156	22.3157	23.3352
	rs3123536	T	C	T	C	0.126379	0.077734	0.89625	0.090951	FALSE	FALSE	FALSE	GVY4Ce	212636264	0.0555392	0.0405999	TRUE	reported	textfile	0.0245728	2.7033e-07	TRUE	reported	textfile	8240	TRUE	0.00319979	26.4445	23.3352
	rs34744504	G	T	G	T	-0.0814315	-0.000625075	0.505166	0.421808	FALSE	FALSE	FALSE	GVY4Ce	40995214	0.979169	0.0239398	TRUE	reported	textfile	0.0156028	1.79863e-07	TRUE	reported	textfile	8240	TRUE	0.00329473	27.2317	23.3352
	rs35281705	A	G	A	G	0.0716316	-0.0500626	0.6779	0.349361	FALSE	FALSE	FALSE	GVY4Ce	97658406	0.0449852	0.0249714	TRUE	reported	textfile	0.0162007	9.80114e-06	TRUE	reported	textfile	8240	TRUE	0.00236693	19.545	23.3352
	rs4149067	G	C	G	C	0.0832833	-0.0179238	0.191759	0.304672	FALSE	TRUE	FALSE	GVY4Ce	21200977	0.487085	0.0257914	TRUE	reported	textfile	0.0188237	9.67132e-06	TRUE	reported	textfile	8240	TRUE	0.00237	19.5704	23.3352
	rs55674412	T	A	T	A	-0.143218	0.0477144	0.0595855	0.0473649	FALSE	TRUE	FALSE	GVY4Ce	130531579	0.390504	0.0555656	TRUE	reported	textfile	0.0316604	6.08044e-06	TRUE	reported	textfile	8240	TRUE	0.00247718	20.4577	23.3352
	rs6024739	C	T	C	T	-0.082091	-0.0183168	0.756911	0.230671	FALSE	FALSE	FALSE	GVY4Ce	56264559	0.510003	0.027802	TRUE	reported	textfile	0.0179227	4.64338e-06	TRUE	reported	textfile	8240	TRUE	0.00253953	20.9739	23.3352
	rs6719212	A	G	A	G	-0.0668909	-0.0202891	0.536605	0.476174	FALSE	FALSE	FALSE	GVY4Ce	53600047	0.389902	0.0235976	TRUE	reported	textfile	0.0149722	7.90801e-06	TRUE	reported	textfile	8240	TRUE	0.00241649	19.9553	23.3352
	rs6983258	G	T	G	T	0.114187	0.00964689	0.0967329	0.912674	FALSE	FALSE	FALSE	GVY4Ce	121940855	0.817537	0.0418132	TRUE	reported	textfile	0.0252057	5.89203e-06	TRUE	reported	textfile	8240	TRUE	0.00248444	20.5178	23.3352
	rs7116407	T	C	T	C	-0.173285	-0.0204651	0.0368633	0.98159	FALSE	FALSE	FALSE	GVY4Ce	32615368	0.809669	0.0849692	TRUE	reported	textfile	0.0391521	9.60228e-06	TRUE	reported	textfile	8240	TRUE	0.00237167	19.5842	23.3352
	rs73135319	T	C	T	C	0.0978948	-0.0353444	0.145563	0.843433	FALSE	FALSE	FALSE	GVY4Ce	46491749	0.274607	0.0323514	TRUE	reported	textfile	0.0212543	4.10725e-06	TRUE	reported	textfile	8240	TRUE	0.00256792	21.209	23.3352
	rs75648263	A	T	A	T	-0.15344	-0.00303283	0.0564846	0.111794	FALSE	TRUE	FALSE	GVY4Ce	111550690	0.93532	0.0373715	TRUE	reported	textfile	0.0325258	2.38773e-06	TRUE	reported	textfile	8240	TRUE	0.00269354	22.2493	23.3352
	rs79949294	T	G	T	G	-0.3048	-0.0148308	0.014638	0.989085	FALSE	FALSE	FALSE	GVY4Ce	54089161	0.897625	0.115269	TRUE	reported	textfile	0.0618631	8.34987e-07	TRUE	reported	textfile	8240	TRUE	0.00293739	24.2695	23.3352
	rs80102840	A	G	A	G	-0.270487	0.196511	0.0173319	0.994887	FALSE	FALSE	FALSE	GVY4Ce	30613380	0.211907	0.157418	TRUE	reported	textfile	0.0576409	2.69718e-06	TRUE	reported	textfile	8240	TRUE	0.00266529	22.0154	23.3352
	rs8054168	A	C	A	C	-0.0690726	0.000981315	0.45913	0.552705	FALSE	FALSE	FALSE	GVY4Ce	83582178	0.967098	0.0237902	TRUE	reported	textfile	0.0151392	5.05477e-06	TRUE	reported	textfile	8240	TRUE	0.0025199	20.8114	23.3352
GCST90199698	rs10746936	T	C	T	C	0.0696135	-0.0182959	0.469755	0.571695	FALSE	FALSE	FALSE	GVY4Ce	74171381	0.440882	0.0237391	TRUE	reported	textfile	0.0156968	9.21239e-06	TRUE	reported	textfile	8243	TRUE	0.00238037	19.6634	50.2807
	rs10999904	A	G	A	G	-0.119035	-0.0580278	0.0978539	0.893087	FALSE	FALSE	FALSE	GVY4Ce	71591392	0.130926	0.0384173	TRUE	reported	textfile	0.0260573	4.91885e-06	TRUE	reported	textfile	8243	TRUE	0.00252527	20.8634	50.2807
	rs1171616	T	G	T	G	0.143846	-0.00184694	0.769799	0.160376	FALSE	FALSE	FALSE	GVY4Ce	59708831	0.953831	0.0319004	TRUE	reported	textfile	0.0186464	1.21539e-14	TRUE	reported	textfile	8243	TRUE	0.00716797	59.4977	50.2807
	rs117599469	T	C	T	C	0.46237	-0.0940685	0.00565625	0.98067	FALSE	FALSE	FALSE	GVY4Ce	76033684	0.273941	0.0859833	TRUE	reported	textfile	0.102868	6.96425e-06	TRUE	reported	textfile	8243	TRUE	0.00244495	20.1982	50.2807
	rs118057342	A	G	A	G	-0.406794	0.0130248	0.00889593	0.988067	FALSE	FALSE	FALSE	GVY4Ce	31405249	0.901904	0.105672	TRUE	reported	textfile	0.0823501	7.81961e-07	TRUE	reported	textfile	8243	TRUE	0.00295156	24.3958	50.2807
	rs1361218	A	G	A	G	0.070309	0.0300345	0.437217	0.549825	FALSE	FALSE	FALSE	GVY4Ce	154394978	0.208397	0.023875	TRUE	reported	textfile	0.0158874	9.62371e-06	TRUE	reported	textfile	8243	TRUE	0.00237028	19.5799	50.2807
	rs137953078	C	T	C	T	0.356478	-0.115301	0.0103175	0.998011	FALSE	FALSE	FALSE	GVY4Ce	73706473	0.697439	0.296571	TRUE	reported	textfile	0.0762052	2.89864e-06	TRUE	reported	textfile	8243	TRUE	0.00264764	21.8772	50.2807
	rs138449764	G	T	G	T	0.282029	0.0906244	0.0162918	0.991955	FALSE	FALSE	FALSE	GVY4Ce	6491089	0.505712	0.136169	TRUE	reported	textfile	0.061021	3.80354e-06	TRUE	reported	textfile	8243	TRUE	0.00258476	21.3562	50.2807
	rs17419942	T	C	T	C	-0.174599	0.0116443	0.045358	0.967956	FALSE	FALSE	FALSE	GVY4Ce	27866608	0.862269	0.0671193	TRUE	reported	textfile	0.0372747	2.81177e-06	TRUE	reported	textfile	8243	TRUE	0.0026547	21.9356	50.2807
	rs17876025	G	A	G	A	0.462622	-0.0159427	0.00642595	0.979474	FALSE	FALSE	FALSE	GVY4Ce	177406285	0.846077	0.0821255	TRUE	reported	textfile	0.096872	1.79167e-06	TRUE	reported	textfile	8243	TRUE	0.00275912	22.8008	50.2807
[truncated: 30,825 more rows]

## Sheet: S6.2
The single SNP's effect estimated in peripheral blood metabolites phenotypes to AAA of FinnGen database.
[truncated: 34,836 more rows]

[truncated: 2 more sheets: S6.3, S6.4]
