# Supplementary material
Source: Frontiers journal article supplement (https://www.frontiersin.org/articles/1413183)
Supplement: Table_7.xlsx [file Table_7.xlsx]

## Sheet: Content
Content
S7.1. The resluts of forward univariable MR analysis between gut microbiota and the risk of AAA in FinnGen database.
S7.2. The resluts of forward univariable MR analysis between gut microbiota phenotypes and the risk of AAA in UK Bio-Bank database.

## Sheet: S7.1
The resluts of forward univariable MR analysis between gut microbiota and the risk of AAA in FinnGen database.
id	nsnp	MR-Egger			Weighted median			Inverse variance weighted			Simple mode			Weighted mode			MR-Egger intercept		MR-PRESSO global	MR-IVW			MR-Egeer
		p_value	OR	95% OR	p_value	OR	95% OR	p_value	OR	95% OR	p_value	OR	95% OR	p_value	OR	95% OR	egger intercept	p_value	p_value	Q	Q_df	Q_pval	Q	Q_df	Q_pval
ebi-a-GCST90027458.csv	37	0.036	1.63464	1.04979-2.5453	0	0.6587	0.57774-0.75100	0	0.80893	0.72093-0.90768	0	0.60187	0.46658-0.77638	0.01	0.60343	0.41967-0.86765	-0.08041	0.00291	<0.001	75.4717	36	0.00013	58.3812	35	0.00785
ebi-a-GCST90027461.csv	46	0.451	1.23919	0.71290-2.1540	0	0.6873	0.60839-0.77644	0	0.72927	0.66487-0.79990	0.003	0.68332	0.53720-0.86918	0.004	0.68332	0.53523-0.87238	-0.04255	0.06315	1	15.3082	45	0.99999	11.6739	44	1
ebi-a-GCST90027463.csv	62	0.135	1.41872	0.90286-2.2293	0	1.15071	1.09582-1.20834	0	1.08508	1.04687-1.12468	0.011	1.16339	1.03899-1.30268	0.011	1.16115	1.03776-1.29921	-0.06027	0.24807	0.901	47.6079	61	0.89491	46.2474	60	0.90397
ebi-a-GCST90027476.csv	48	0.007	1.53749	1.13944-2.0746	0.052	0.88019	0.77370-1.00135	0	0.84953	0.77665-0.92925	0.013	0.67066	0.49438-0.90978	0.007	0.67589	0.51523-0.88667	-0.06138	0.00018	0.767	41.4075	47	0.7026	24.8654	46	0.99539
ebi-a-GCST90027478.csv	358	0.003	0.61894	0.45023-0.8509	0	1.39899	1.35357-1.44593	0	1.25784	1.22544-1.29110	0	1.40041	1.27765-1.53496	0	1.40041	1.28561-1.52545	0.07885	2e-05	0.011	450.249	357	0.00058	427.212	356	0.00564
ebi-a-GCST90027481.csv	90	0.526	1.11232	0.80165-1.5434	0.022	0.90347	0.82813-0.98566	0	0.88013	0.82688-0.93680	0.401	0.90382	0.71465-1.14306	0.424	0.90382	0.70631-1.15657	-0.02259	0.15705	0.825	76.16	89	0.83207	74.123	88	0.85445
ebi-a-GCST90027487.csv	77	0.792	0.95915	0.70442-1.3060	0	1.16574	1.10880-1.22559	0	1.08683	1.04858-1.12648	0.006	1.17735	1.05115-1.31869	0.004	1.17939	1.05663-1.31641	0.02583	0.42683	0.847	63.7199	76	0.84147	63.0815	75	0.83518
ebi-a-GCST90027489.csv	91	0.104	0.88808	0.77068-1.0234	0	0.88386	0.84311-0.92657	0	0.9208	0.89047-0.95215	0.057	0.8844	0.78071-1.00187	0.063	0.8844	0.77827-1.00502	0.01112	0.6081	0.708	83.7963	90	0.66402	83.5314	89	0.64369
ebi-a-GCST90027490.csv	85	0.608	0.87542	0.52776-1.4521	0	1.31656	1.18889-1.45795	0	1.16872	1.07647-1.26889	0.002	1.58247	1.18736-2.10906	0.005	1.57589	1.15814-2.14434	0.02568	0.25999	<0.001	131.708	84	0.00069	129.698	83	0.0008
ebi-a-GCST90027495.csv	70	0.06	0.59753	0.35237-1.0132	0	1.41509	1.27573-1.56967	0	1.34514	1.24175-1.45713	0	1.73566	1.38178-2.18017	0	1.72859	1.36474-2.18945	0.07462	0.00333	0.057	92.1142	69	0.03302	81.0748	68	0.13291
ebi-a-GCST90027504.csv	57	0.302	1.32827	0.77904-2.2647	0.064	1.11379	0.99360-1.24852	0	1.21802	1.11218-1.33394	0.538	1.10131	0.81142-1.49476	0.544	1.10131	0.80798-1.50113	-0.0093	0.74785	0.032	77.5271	56	0.02998	77.3802	55	0.025
ebi-a-GCST90027508.csv	50	0.299	0.6331	0.26980-1.4856	0.06	0.86604	0.74534-1.00628	0	0.74959	0.66149-0.84942	0.009	0.47563	0.27910-0.81057	0.987	1.00314	0.68101-1.47764	0.01462	0.6965	<0.001	102.647	49	1e-05	102.319	48	1e-05
ebi-a-GCST90027516.csv	29	0.08	2.62112	0.92648-7.4155	0.013	0.82559	0.70966-0.96047	0	0.79296	0.71127-0.88404	0.302	0.84513	0.61749-1.15671	0.282	0.84513	0.62563-1.14166	-0.11517	0.0317	0.559	27.0385	28	0.51615	21.9051	27	0.74218
ebi-a-GCST90027527.csv	82	0.645	1.06895	0.80589-1.4179	0	1.26992	1.15070-1.40148	0	1.15548	1.07963-1.23665	0.008	1.45449	1.11100-1.90419	0.002	1.45449	1.16233-1.82009	0.00844	0.57951	0.928	63.9833	81	0.91784	63.6738	80	0.90939
ebi-a-GCST90027533.csv	77	0.047	1.59155	1.01458-2.4966	0	0.68355	0.61799-0.75607	0	0.80615	0.74756-0.86934	0.001	0.6745	0.54276-0.83822	0.002	0.6745	0.53294-0.85366	-0.05666	0.00367	0.252	85.285	76	0.21827	76.1504	75	0.44123
ebi-a-GCST90027536.csv	76	0.069	1.35152	0.98202-1.8600	0.655	1.0197	0.93613-1.11074	0	0.87677	0.82110-0.93621	0.743	1.03312	0.85094-1.25431	0.735	1.03312	0.85598-1.24693	-0.04689	0.00838	0.029	102.015	75	0.02075	92.811	74	0.0687
ebi-a-GCST90027538.csv	102	0.766	0.98691	0.90491-1.0763	0	1.16205	1.11810-1.20773	0	1.12508	1.09393-1.15711	0.001	1.16322	1.06337-1.27245	0.001	1.16322	1.06752-1.26750	0.03595	0.0023	0.987	74.0633	101	0.97972	64.2709	100	0.9979
ebi-a-GCST90027546.csv	69	0.041	0.66147	0.44851-0.9755	0.001	1.18794	1.06913-1.31996	0	1.19535	1.11059-1.28658	0.277	1.14993	0.89590-1.47599	0.298	1.13096	0.89843-1.42368	0.05801	0.00337	0.744	61.0457	68	0.71235	51.8038	67	0.91448
ebi-a-GCST90027551.csv	37	0.408	0.9291	0.78211-1.1037	0.449	1.02353	0.96369-1.08707	0	1.08801	1.04264-1.13535	0.848	1.01217	0.89534-1.14424	0.851	1.01217	0.89285-1.14743	0.03832	0.07211	0.883	26.1588	36	0.88605	22.7197	35	0.94564
ebi-a-GCST90027553.csv	81	0.025	1.67865	1.07638-2.6179	0	1.52644	1.36465-1.70741	0	1.2585	1.14245-1.38635	0	1.73437	1.35800-2.21505	0	1.74907	1.33938-2.28408	-0.03134	0.19688	<0.001	163.155	80	0	159.731	79	0
ebi-a-GCST90027571.csv	60	0.095	0.67928	0.43491-1.0610	0	1.46915	1.32143-1.63338	0	1.22554	1.13478-1.32356	0.007	1.47221	1.12175-1.93217	0.006	1.47221	1.12735-1.92257	0.05005	0.01082	0.634	54.7151	59	0.63406	47.7802	58	0.8285
ebi-a-GCST90027577.csv	42	0.358	1.11059	0.89027-1.3854	0.03	0.91836	0.85020-0.99199	0	0.90262	0.85518-0.95268	0.379	0.92381	0.77565-1.10027	0.371	0.92806	0.78957-1.09085	-0.03776	0.0653	0.934	28.1728	41	0.93614	24.5806	40	0.97363
ebi-a-GCST90027583.csv	80	0	2.09497	1.62724-2.6971	0	1.6997	1.52727-1.89160	0	1.4311	1.31596-1.55632	0	1.75522	1.40760-2.18868	0	1.74999	1.39526-2.19490	-0.04199	0.00257	0.129	97.3612	79	0.07884	86.5887	78	0.23673
ebi-a-GCST90027585.csv	31	0	3.21078	1.87528-5.4974	0	1.50718	1.28623-1.76608	0	1.32293	1.16599-1.50098	0.012	1.53222	1.11884-2.09834	0.017	1.53222	1.09990-2.13446	-0.10618	0.00256	0.127	40.6283	30	0.09326	29.5325	29	0.4376
ebi-a-GCST90027586.csv	31	0.272	0.76864	0.48511-1.2179	0.006	0.78571	0.66265-0.93161	0	0.79654	0.70559-0.89922	0.113	0.76045	0.54733-1.05654	0.079	0.75001	0.54989-1.02294	0.00437	0.87602	0.751	25.3332	30	0.70868	25.3084	29	0.66215
ebi-a-GCST90027587.csv	93	0.005	0.44139	0.25389-0.7674	0.587	1.02984	0.92628-1.14498	0	0.82518	0.74325-0.91614	0.097	1.15257	0.97635-1.36058	0.084	1.14701	0.98334-1.33792	0.06674	0.02644	<0.001	256.362	92	0	242.779	91	0
ebi-a-GCST90027588.csv	159	0	0.58209	0.49765-0.6809	0	0.78244	0.73624-0.83155	0	0.90363	0.86424-0.94482	0.001	0.72872	0.60701-0.87484	0.001	0.72872	0.61030-0.87013	0.0646	0	0.014	202.546	158	0.00965	167.867	157	0.26204
ebi-a-GCST90027605.csv	35	0.342	0.83639	0.58150-1.2030	0.03	1.15722	1.01409-1.32056	0	1.19644	1.08527-1.31901	0.053	1.50012	1.00921-2.22982	0.033	1.55782	1.05495-2.30038	0.05407	0.05405	0.066	47.9739	34	0.05655	42.7981	33	0.11817
ebi-a-GCST90027609.csv	53	0.521	0.8204	0.45028-1.4947	0	1.56662	1.40204-1.75051	0	1.47485	1.35818-1.60155	0	1.56435	1.24839-1.96027	0.001	1.56435	1.21937-2.00693	0.0485	0.0586	1	21.124	52	0.99996	17.3814	51	1
ebi-a-GCST90027612.csv	82	0.026	1.59432	1.06424-2.3884	0	1.5485	1.44616-1.65809	0	1.20529	1.10983-1.30896	0	1.56724	1.42041-1.72924	0	1.57558	1.43570-1.72908	-0.04	0.16981	<0.001	329.228	81	0	321.515	80	0
ebi-a-GCST90027620.csv	64	0.396	0.75926	0.40394-1.4271	0	0.68961	0.63914-0.74407	0	0.86329	0.79594-0.93634	0	0.68329	0.60220-0.77531	0	0.68329	0.60264-0.77474	0.01871	0.68891	<0.001	168.459	63	0	168.021	62	0
ebi-a-GCST90027633.csv	47	0.448	1.14186	0.81281-1.6041	0	1.24222	1.11925-1.37871	0	1.16152	1.07685-1.25285	0.038	1.25096	1.01889-1.53589	0.038	1.24693	1.01868-1.52632	0.00185	0.92005	0.726	40.9384	46	0.68374	40.9282	45	0.64505
ebi-a-GCST90027637.csv	66	0.921	1.02124	0.67696-1.5406	0.035	1.11103	1.00766-1.22500	0	1.12904	1.05549-1.20772	0.001	1.53822	1.19376-1.98208	0.713	1.04468	0.82844-1.31737	0.01207	0.62934	0.465	65.8229	65	0.44816	65.5818	64	0.42171
ebi-a-GCST90027639.csv	213	0.092	1.25795	0.96462-1.6405	0	0.84604	0.79703-0.89807	0	0.90366	0.86691-0.94198	0.076	0.84165	0.69647-1.01709	0.044	0.84165	0.71256-0.99413	-0.02749	0.01422	1	84.7257	212	1	78.6135	211	1
ebi-a-GCST90027649.csv	51	0.569	1.17869	0.67231-2.0664	0	0.6859	0.60547-0.77701	0	0.82622	0.75663-0.90221	0.005	0.65769	0.49798-0.86863	0.007	0.65769	0.49251-0.87828	-0.03444	0.21517	0.44	51.4622	50	0.41629	49.8578	49	0.43902
ebi-a-GCST90027651.csv	360	0	1.61751	1.39236-1.8791	0	1.14176	1.10212-1.18284	0	1.10152	1.07442-1.12931	0.005	1.16977	1.04814-1.30551	0.006	1.16024	1.04323-1.29037	-0.0458	0	1	201.58	359	1	175.624	358	1
ebi-a-GCST90027662.csv	405	0	1.57022	1.37851-1.7886	0	1.11952	1.08641-1.15365	0	1.09161	1.06844-1.11529	0.012	1.13222	1.02828-1.24667	0.014	1.127	1.02525-1.23885	-0.04846	0	1	163.3	404	1	132.515	403	1
ebi-a-GCST90027667.csv	55	0.062	1.22	0.99442-1.4967	0.118	0.92299	0.83486-1.02044	0	0.83669	0.78181-0.89543	0.003	0.65752	0.50574-0.85486	0.458	0.93142	0.77301-1.12230	-0.04214	0.00034	0.517	54.7214	54	0.447	40.0538	53	0.90511
ebi-a-GCST90027669.csv	77	0.086	1.30972	0.96601-1.7757	0	1.18172	1.12057-1.24621	0	1.15805	1.10206-1.21689	0.032	1.16507	1.01556-1.33658	0.028	1.15932	1.01907-1.31886	-0.02228	0.42439	<0.001	173.109	76	0	171.633	75	0
ebi-a-GCST90027672.csv	67	0.103	1.20016	0.96692-1.4897	0	1.23525	1.12528-1.35597	0	1.1483	1.06880-1.23371	0.059	1.23591	0.99565-1.53414	0.049	1.23591	1.00437-1.52083	-0.00797	0.67239	1	15.9222	66	1	15.7418	65	1
ebi-a-GCST90027673.csv	43	0.003	0.27646	0.12625-0.6054	0	1.43829	1.26141-1.63997	0	1.19654	1.08974-1.31381	0.015	1.48946	1.09629-2.02363	0.011	1.48946	1.10905-2.00035	0.11827	0.00065	0.446	42.5811	42	0.44597	28.9689	41	0.92088
ebi-a-GCST90027674.csv	81	0.008	0.56946	0.38041-0.8525	0	0.77028	0.70697-0.83925	0	0.83371	0.78176-0.88912	0.01	0.76107	0.62078-0.93307	0.006	0.76312	0.63158-0.92205	0.03667	0.06436	0.997	48.8927	80	0.99763	45.3735	79	0.99914
ebi-a-GCST90027675.csv	87	0.001	0.33878	0.18610-0.6167	0	0.71492	0.64780-0.78899	0	0.83071	0.77216-0.89371	0.005	0.71482	0.56750-0.90037	0.011	0.71728	0.55788-0.92222	0.08575	0.00405	0.2	97.85	86	0.17999	88.7355	85	0.36942
ebi-a-GCST90027681.csv	75	0.676	0.95158	0.75463-1.1999	0.002	1.11261	1.03989-1.19041	0	1.1003	1.04898-1.15413	0.168	1.12336	0.95356-1.32341	0.089	1.14995	0.98098-1.34804	0.02263	0.21373	0.763	65.0184	74	0.76271	63.4451	73	0.78004
ebi-a-GCST90027688.csv	397	0	1.44187	1.24756-1.6665	0	1.12114	1.08821-1.15507	0	1.09845	1.07486-1.12256	0.013	1.13421	1.02702-1.25258	0.015	1.13017	1.02471-1.24648	-0.03623	0.00022	1	138.808	396	1	124.928	395	1
ebi-a-GCST90027699.csv	64	0.001	2.02763	1.34278-3.0618	0	0.74143	0.68557-0.80184	0	0.78862	0.74541-0.83432	0.001	0.7405	0.62098-0.88302	0.001	0.7405	0.62932-0.87131	-0.10475	3e-05	0.918	50.6646	63	0.86858	30.1102	62	0.99979
ebi-a-GCST90027702.csv	74	0.088	1.30398	0.96495-1.7621	0	1.17916	1.11712-1.24465	0	1.1477	1.09249-1.20570	0.028	1.16057	1.01884-1.32202	0.041	1.15504	1.00870-1.32262	-0.02309	0.40234	<0.001	158.283	73	0	156.738	72	0
ebi-a-GCST90027706.csv	48	0.984	1.00397	0.68320-1.4753	0	1.25192	1.14599-1.36763	0	1.23944	1.15259-1.33282	0.024	1.24599	1.03586-1.49876	0.017	1.24599	1.04627-1.48385	0.02595	0.28035	0.068	64.8513	47	0.04308	63.2115	46	0.04675
ebi-a-GCST90027707.csv	42	0.002	0.25808	0.11682-0.5701	0	1.44001	1.26901-1.63406	0	1.2037	1.09494-1.32327	0.005	1.48564	1.14075-1.93481	0.01	1.48564	1.11284-1.98332	0.12465	0.00044	0.457	41.8124	41	0.43537	27.1056	40	0.94033
ebi-a-GCST90027709.csv	206	0.025	1.15787	1.01944-1.3151	0	0.90835	0.88721-0.92999	0	0.93647	0.91956-0.95369	0.009	0.90123	0.83459-0.97319	0.007	0.90123	0.83576-0.97184	-0.04064	0.00114	1	51.3775	205	1	40.4834	204	1
ebi-a-GCST90027713.csv	67	0	0.4443	0.31389-0.6289	0.241	0.93133	0.82700-1.04883	0	0.77058	0.70885-0.83768	0.823	0.96411	0.70060-1.32674	0.892	0.97515	0.67965-1.39913	0.05763	0.0022	0.094	83.455	66	0.07218	72.1715	65	0.25295
ebi-a-GCST90027714.csv	88	0.001	0.35467	0.19486-0.6456	0	0.71493	0.64740-0.78949	0	0.83334	0.77467-0.89645	0.006	0.71517	0.56610-0.90349	0.013	0.71763	0.55602-0.92620	0.08173	0.00605	0.192	99.2782	87	0.17353	90.902	86	0.33815
ebi-a-GCST90027726.csv	77	0.728	0.95976	0.76185-1.2091	0.002	1.1127	1.04011-1.19034	0	1.10268	1.05212-1.15566	0.151	1.12296	0.95998-1.31361	0.121	1.14261	0.96727-1.34974	0.02167	0.23265	0.805	65.4154	76	0.80156	63.9675	75	0.81435
ebi-a-GCST90027727.csv	167	0	1.86009	1.37542-2.5155	0	1.25931	1.19563-1.32638	0	1.13544	1.09187-1.18075	0.002	1.26184	1.08892-1.46222	0.003	1.26184	1.08587-1.46633	-0.06966	0.00148	1	112.847	166	0.99945	102.4	165	0.99997
ebi-a-GCST90027735.csv	37	0.032	1.72678	1.06859-2.7904	0	1.18336	1.09883-1.27438	0	1.10747	1.04622-1.17231	0.042	1.19064	1.01231-1.40039	0.055	1.19064	1.00235-1.41431	-0.08024	0.07625	0.994	17.442	36	0.99611	14.1044	35	0.99936
ebi-a-GCST90027736.csv	405	0	1.57048	1.37865-1.7890	0	1.11954	1.08779-1.15222	0	1.09162	1.06844-1.11530	0.011	1.13237	1.02945-1.24558	0.013	1.12715	1.02586-1.23846	-0.04847	0	1	163.308	404	1	132.527	403	1
ebi-a-GCST90027748.csv	360	0	1.6176	1.39241-1.8792	0	1.14177	1.10308-1.18183	0	1.10153	1.07442-1.12931	0.006	1.16976	1.04671-1.30729	0.003	1.16023	1.05199-1.27962	-0.0458	0	1	201.581	359	1	175.625	358	1
ebi-a-GCST90027753.csv	40	0.028	1.41215	1.05097-1.8974	0	1.18237	1.10318-1.26725	0	1.09567	1.04175-1.15238	0.025	1.18413	1.02738-1.36479	0.018	1.18413	1.03598-1.35346	-0.05552	0.09566	0.985	22.8343	39	0.98178	19.9145	38	0.99311
ebi-a-GCST90027754.csv	379	0	1.68639	1.46384-1.9428	0	1.1268	1.09228-1.16240	0	1.07893	1.05474-1.10369	0.008	1.15933	1.04064-1.29155	0.004	1.14605	1.04405-1.25801	-0.05667	0	1	208.75	378	1	169.484	377	1
ebi-a-GCST90027757.csv	175	0	0.47332	0.35809-0.6256	0	1.1415	1.08661-1.19917	0	1.08098	1.04159-1.12185	0.036	1.16994	1.01185-1.35272	0.028	1.16607	1.01828-1.33531	0.09279	0	1	113.51	174	0.99988	79.2455	173	1
ebi-a-GCST90027768.csv	62	0.107	1.15525	0.97167-1.3735	0	0.85549	0.81671-0.89612	0	0.88903	0.85891-0.92020	0.002	0.84795	0.76710-0.93733	0.004	0.84795	0.76117-0.94463	-0.04931	0.00363	0.999	34.933	61	0.99706	25.7688	60	0.99997
ebi-a-GCST90027771.csv	43	0.005	0.59345	0.42051-0.8375	0	0.78221	0.72298-0.84630	0	0.81448	0.76905-0.86259	0.004	0.78655	0.67419-0.91765	0.001	0.7744	0.66839-0.89722	0.05558	0.07523	0.345	48.4306	42	0.22945	44.7904	41	0.31579
ebi-a-GCST90027772.csv	72	0.004	1.89786	1.24945-2.8828	0	0.7381	0.68419-0.79625	0	0.80989	0.76678-0.85542	0.002	0.73666	0.61333-0.88478	0.002	0.73666	0.61195-0.88677	-0.09406	0.00014	0.486	72.6725	71	0.42264	56.4584	70	0.87911
ebi-a-GCST90027777.csv	32	0.636	1.22363	0.53453-2.8011	0	1.51819	1.29953-1.77365	0	1.22479	1.09724-1.36718	0.019	1.59883	1.10255-2.31851	0.018	1.59883	1.10687-2.30945	9e-05	0.99821	0.343	34.4162	31	0.30751	34.4162	30	0.2645
ebi-a-GCST90027783.csv	31	0.026	2.19206	1.13987-4.2155	0	1.2723	1.18205-1.36944	0	1.17049	1.09473-1.25149	0	1.31901	1.16754-1.49014	0	1.31451	1.15126-1.50091	-0.14513	0.06883	0.009	57.1898	30	0.00199	50.9197	29	0.00718
ebi-a-GCST90027784.csv	14	0.757	0.29659	0.00016-543.9138	0.001	1.15539	1.06279-1.25606	0	1.15605	1.08221-1.23492	0.034	1.1701	1.02711-1.33299	0.037	1.16992	1.02448-1.33600	0.36397	0.72885	1	0.1624	13	1	0.03647	12	1
ebi-a-GCST90027789.csv	55	0.431	0.87876	0.63868-1.2091	0	1.24894	1.14693-1.36001	0	1.2051	1.12316-1.29301	0.025	1.24033	1.03342-1.48866	0.023	1.24033	1.03613-1.48477	0.04022	0.0522	0.008	79.6343	54	0.01321	74.1179	53	0.02928
ebi-a-GCST90027796.csv	89	0.001	0.35027	0.19218-0.6384	0	0.71513	0.64845-0.78868	0	0.83289	0.77560-0.89441	0.007	0.71608	0.56610-0.90580	0.008	0.71851	0.56697-0.91054	0.08266	0.00551	0.229	98.3209	88	0.21206	89.9424	87	0.39319
ebi-a-GCST90027808.csv	94	0.079	0.83104	0.67754-1.0193	0	1.10671	1.05757-1.15813	0	1.07524	1.03800-1.11382	0.078	1.10776	0.98986-1.23970	0.092	1.10776	0.98471-1.24618	0.03801	0.01381	0.999	52.0477	93	0.99981	45.7461	92	0.99999
ebi-a-GCST90027810.csv	75	0.663	0.94971	0.75378-1.1966	0.003	1.11242	1.03721-1.19308	0	1.10024	1.04889-1.15410	0.137	1.12356	0.96535-1.30770	0.101	1.14687	0.97545-1.34840	0.02291	0.20615	0.785	65.0566	74	0.76165	63.4295	73	0.78046
ebi-a-GCST90027811.csv	163	0	1.92113	1.42460-2.5907	0	1.25973	1.19273-1.33050	0	1.13071	1.08679-1.17640	0.003	1.26148	1.08351-1.46868	0.006	1.26148	1.07274-1.48342	-0.07449	0.00059	0.996	113.486	162	0.99859	101.199	161	0.99994
ebi-a-GCST90027821.csv	47	0.816	1.04333	0.73140-1.4883	0.003	0.88595	0.81685-0.96089	0	0.89902	0.84755-0.95362	0.163	0.88516	0.74776-1.04780	0.141	0.88516	0.75466-1.03821	-0.01835	0.40925	0.856	35.9407	46	0.85674	35.2469	45	0.85123
ebi-a-GCST90027824.csv	86	0	4.7756	3.12575-7.2963	0	0.7527	0.67547-0.83877	0	0.68007	0.62616-0.73862	0.003	0.46836	0.28624-0.76637	0	0.47032	0.33262-0.66503	-0.17095	0	<0.001	148.226	85	3e-05	65.1806	84	0.93634
ebi-a-GCST90027827.csv	240	0.412	0.96774	0.89500-1.0464	0	0.91427	0.88564-0.94382	0	0.93373	0.91239-0.95557	0.017	0.88327	0.79843-0.97712	0.01	0.88468	0.80621-0.97079	-0.00848	0.34848	1	79.9116	239	1	79.0291	238	1
ebi-a-GCST90027829.csv	21	0.002	0.5806	0.43381-0.7771	0.005	0.83286	0.73386-0.94521	0	0.72269	0.66206-0.78886	0.001	0.5921	0.44816-0.78227	0.11	0.85182	0.70602-1.02773	0.05271	0.14039	0.294	26.5122	20	0.14956	23.5749	19	0.21297
ebi-a-GCST90027840.csv	245	0	1.8113	1.51886-2.1600	0	0.79014	0.75197-0.83025	0	0.91815	0.88663-0.95080	0.007	0.77463	0.64530-0.92987	0.011	0.77625	0.63930-0.94253	-0.07037	0	1	162.512	244	0.99998	102.973	243	1
ebi-a-GCST90027841.csv	125	0	1.42867	1.20663-1.6916	0	1.20179	1.13713-1.27014	0	1.09187	1.04665-1.13904	0.036	1.20207	1.01362-1.42556	0.033	1.20207	1.01651-1.42150	-0.04849	0.00163	1	65.9233	124	1	55.54	123	1
ebi-a-GCST90027842.csv	213	0.024	1.13673	1.01778-1.2696	0	0.90788	0.88634-0.92995	0	0.93815	0.92150-0.95510	0.01	0.90042	0.83187-0.97462	0.007	0.90042	0.83458-0.97146	-0.03711	0.00068	1	56.9126	212	1	45.009	211	1
ebi-a-GCST90027845.csv	45	0.038	0.73052	0.54819-0.9735	0	0.88482	0.83322-0.93962	0	0.86792	0.81657-0.92250	0.044	0.88579	0.78996-0.99323	0.031	0.88579	0.79601-0.98569	0.05364	0.23533	<0.001	117.657	44	0	113.822	43	0
ebi-a-GCST90027847.csv	54	0.086	0.50624	0.23633-1.0844	0	2.37994	2.08281-2.71947	0	1.76738	1.53889-2.02979	0	2.51292	2.08445-3.02946	0	2.51292	2.02063-3.12514	0.11541	0.00195	<0.001	194.16	53	0	161.168	52	0
ebi-a-GCST90027848.csv	89	0.001	0.75397	0.64578-0.8803	0.615	1.01426	0.95983-1.07176	0	1.12338	1.06797-1.18166	0.521	0.96779	0.87594-1.06926	0.509	0.97029	0.88757-1.06072	0.0771	0	<0.001	208.406	88	0	158.04	87	0
ebi-a-GCST90027853.csv	104	0.001	0.63484	0.49426-0.8154	0	0.74289	0.70757-0.77997	0	0.84383	0.80012-0.88993	0	0.68526	0.62474-0.75164	0	0.68526	0.60888-0.77122	0.06124	0.02479	<0.001	428.44	103	0	407.69	102	0
ebi-a-GCST90027498.csv	36	0.013	0.33958	0.15175-0.7599	0.005	0.77469	0.64957-0.92390	0.001	0.75856	0.64400-0.89350	0.008	0.47515	0.28331-0.79691	0.011	0.48344	0.28525-0.81934	0.08285	0.05422	<0.001	104.797	35	0	93.8246	34	0
ebi-a-GCST90027521.csv	86	0.389	0.88438	0.66978-1.1677	0	0.88163	0.83209-0.93412	0.001	0.93092	0.89370-0.96969	0.056	0.8688	0.75341-1.00186	0.048	0.87018	0.75963-0.99682	0.00766	0.71558	1	43.0445	85	0.99996	42.9108	84	0.99994
ebi-a-GCST90027548.csv	38	0.733	0.8947	0.47485-1.6858	0.001	1.29027	1.11682-1.49065	0.001	1.20703	1.08092-1.34785	0.01	1.54676	1.12694-2.12299	0.027	1.45148	1.05764-1.99197	0.02886	0.35304	0.257	43.9386	37	0.20115	42.8841	36	0.19985
ebi-a-GCST90027590.csv	82	0	0.45942	0.37680-0.5601	0.603	1.01328	0.96418-1.06489	0.001	0.93908	0.90529-0.97413	0.607	1.02997	0.92063-1.15229	0.596	1.02767	0.92927-1.13650	0.12534	0	0.208	92.7801	81	0.17466	41.2823	80	0.9999
ebi-a-GCST90027629.csv	74	0.009	0.66463	0.49424-0.8938	0.01	0.88115	0.80068-0.96972	0.001	0.89008	0.83011-0.95439	0.269	0.88903	0.72292-1.09332	0.391	0.89933	0.70667-1.14452	0.03526	0.05054	1	32.9591	73	0.99999	29.0045	72	1
ebi-a-GCST90027690.csv	28	0.462	0.70939	0.28794-1.7477	0.004	0.80861	0.69977-0.93439	0.001	0.82995	0.74510-0.92445	0.095	0.789	0.60348-1.03157	0.1	0.789	0.60070-1.03634	0.01424	0.73388	0.986	13.6833	27	0.98416	13.5652	26	0.9783
ebi-a-GCST90027705.csv	57	0.024	0.46078	0.23929-0.8873	0	1.1583	1.08799-1.23316	0.001	1.08092	1.03365-1.13034	0.032	1.16823	1.01682-1.34220	0.028	1.16823	1.02057-1.33726	0.13092	0.01337	0.999	26.892	56	0.99965	20.3567	55	0.99999
ebi-a-GCST90027719.csv	107	0.671	0.87004	0.45894-1.6494	0.001	1.14486	1.05500-1.24237	0.001	1.1092	1.04313-1.17945	0.161	1.1469	0.94826-1.38715	0.212	1.1469	0.92614-1.42029	0.02286	0.45635	1	17.5949	106	1	17.0359	105	1
ebi-a-GCST90027788.csv	52	0.013	0.42564	0.22159-0.8176	0	1.15733	1.08738-1.23178	0.001	1.08419	1.03410-1.13671	0.039	1.17092	1.01168-1.35521	0.029	1.17092	1.02006-1.34408	0.14422	0.00697	1	22.3958	51	0.99983	14.4732	50	1
ebi-a-GCST90027802.csv	107	0.389	0.73813	0.37085-1.4692	0.001	1.14384	1.05770-1.23700	0.001	1.10891	1.04305-1.17893	0.191	1.14629	0.93522-1.40500	0.16	1.14629	0.94856-1.38524	0.03834	0.24724	1	18.1454	106	1	16.7915	105	1
ebi-a-GCST90027850.csv	8	0.174	1.4985	0.89668-2.5042	0.003	1.2679	1.08678-1.47921	0.001	1.23073	1.08521-1.39577	0.085	1.26875	1.00518-1.60143	0.078	1.26875	1.01162-1.59124	-0.03443	0.46778	0.994	1.20282	7	0.99086	0.60222	6	0.99636
ebi-a-GCST90027462.csv	56	0.971	0.9922	0.65061-1.5131	0	0.85706	0.80774-0.90940	0.002	0.93806	0.90104-0.97659	0.033	0.84813	0.73154-0.98331	0.021	0.8495	0.74286-0.97145	-0.00934	0.79446	0.458	56.4483	55	0.42059	56.3768	54	0.38614
ebi-a-GCST90027467.csv	34	0.06	1.41068	0.99799-1.9940	0.03	0.89732	0.81385-0.98936	0.002	0.89562	0.83551-0.96005	0.236	0.88919	0.73471-1.07615	0.218	0.88919	0.74033-1.06799	-0.061	0.01313	0.969	20.1291	33	0.96165	13.231	32	0.99862
ebi-a-GCST90027507.csv	65	0.607	0.88987	0.57144-1.3858	0.022	0.87888	0.78710-0.98136	0.002	0.88281	0.81623-0.95481	0.007	0.66899	0.50414-0.88776	0.009	0.66899	0.50039-0.89441	-0.00088	0.9715	0.147	76.4341	64	0.13719	76.4325	63	0.11914
ebi-a-GCST90027557.csv	162	0	0.58273	0.44374-0.7653	0	0.80967	0.77608-0.84471	0.002	0.94495	0.91095-0.98022	0	0.76901	0.68951-0.85768	0	0.76625	0.68752-0.85399	0.0887	0.00059	<0.001	361.382	161	0	335.589	160	0
ebi-a-GCST90027578.csv	34	0.844	0.96414	0.67288-1.3815	0.004	1.21472	1.06246-1.38880	0.002	1.17882	1.06238-1.30801	0.118	1.26884	0.94864-1.69714	0.151	1.22314	0.93486-1.60032	0.01936	0.26095	0.996	15.169	33	0.99663	13.8593	32	0.99782
ebi-a-GCST90027648.csv	40	0.036	0.78965	0.63857-0.9765	0.032	0.93822	0.88503-0.99461	0.002	0.92994	0.88782-0.97406	0.026	0.8593	0.75567-0.97713	0.03	0.8593	0.75286-0.98078	0.03938	0.13025	1	13.9903	39	0.99992	11.5984	38	0.99999
ebi-a-GCST90027720.csv	54	0.38	0.83802	0.56678-1.2391	0.671	0.98431	0.91517-1.05868	0.002	1.09792	1.03433-1.16543	0.392	0.93646	0.80680-1.08696	0.301	0.93428	0.82233-1.06148	0.0379	0.1767	0.026	76.2236	53	0.02	73.5698	52	0.02611
ebi-a-GCST90027815.csv	26	0.201	0.82629	0.62186-1.0979	0	1.20585	1.09725-1.32521	0.002	1.11201	1.03885-1.19033	0.036	1.24696	1.02563-1.51605	0.041	1.24501	1.01975-1.52004	0.0549	0.04553	0.805	18.5756	25	0.817	14.1263	24	0.94375
ebi-a-GCST90027833.csv	48	0.039	0.7633	0.59526-0.9788	0.863	1.00613	0.93882-1.07826	0.002	1.09335	1.03447-1.15559	0.006	1.33053	1.09480-1.61702	0.991	1.00113	0.82041-1.22165	0.06775	0.00578	0.007	76.7467	47	0.00398	64.917	46	0.03438
ebi-a-GCST90027455.csv	40	0.323	1.24972	0.80790-1.9332	0	1.32501	1.15791-1.51622	0.003	1.17056	1.05372-1.30036	0.005	1.54662	1.15705-2.06735	0.008	1.54662	1.13967-2.09888	-0.00607	0.76343	0.162	48.3195	39	0.14562	48.203	38	0.12416
ebi-a-GCST90027474.csv	19	0.242	0.73309	0.44351-1.2117	0.007	0.81594	0.70468-0.94477	0.003	0.85295	0.76917-0.94586	0.097	0.79943	0.62217-1.02720	0.075	0.81188	0.65386-1.00809	0.02154	0.55379	0.503	18.0038	18	0.4554	17.6255	17	0.41283
ebi-a-GCST90027592.csv	140	0	0.4745	0.35522-0.6338	0	1.45416	1.33874-1.57953	0.003	1.10413	1.03338-1.17973	0.001	1.46409	1.16572-1.83882	0	1.46409	1.20298-1.78186	0.07827	0	<0.001	203.652	139	0.00029	163.268	138	0.06991
ebi-a-GCST90027618.csv	56	0.273	1.52386	0.72286-3.2125	0.282	0.92172	0.79443-1.06940	0.003	0.8301	0.73341-0.93955	0.87	1.03673	0.67351-1.59584	0.831	1.03673	0.74566-1.44142	-0.05678	0.11143	0.001	99.0635	55	0.00025	94.4815	54	0.00055
ebi-a-GCST90027638.csv	47	0.864	1.03596	0.69320-1.5482	0.023	0.8526	0.74288-0.97853	0.003	0.8625	0.78240-0.95080	0.024	0.70382	0.52428-0.94484	0.012	0.71185	0.55210-0.91783	-0.0232	0.3617	0.902	34.0784	46	0.90302	33.2292	45	0.90272
ebi-a-GCST90027793.csv	58	0.43	1.26126	0.71159-2.2355	0	0.81898	0.73397-0.91383	0.003	0.88366	0.81475-0.95839	0.112	0.8153	0.63623-1.04477	0.11	0.8153	0.63706-1.04341	-0.03096	0.22353	1	22.2711	57	0.99999	20.7562	56	1
ebi-a-GCST90027823.csv	33	0.143	1.25489	0.93343-1.6870	0	1.14483	1.06317-1.23276	0.003	1.08432	1.02724-1.14457	0.082	1.14922	0.98754-1.33738	0.061	1.14922	0.99888-1.32218	-0.04898	0.33265	0.985	17.5702	32	0.98185	16.6016	31	0.98377
ebi-a-GCST90027471.csv	56	0.868	0.96407	0.62787-1.4803	0.102	1.09922	0.98134-1.23126	0.004	1.12483	1.03834-1.21852	0.548	1.08333	0.83568-1.40437	0.495	1.08658	0.85747-1.37689	0.01312	0.47617	0.929	41.2418	55	0.91552	40.727	54	0.90896
ebi-a-GCST90027480.csv	59	0.341	0.86993	0.65470-1.1559	0.024	0.88295	0.79236-0.98388	0.004	0.88708	0.81713-0.96301	0.089	0.79813	0.61796-1.03083	0.08	0.79651	0.62015-1.02303	0.00199	0.88865	1	16.8435	58	1	16.8237	57	1
ebi-a-GCST90027685.csv	10	0.091	2.37769	0.98193-5.7574	0.004	1.27642	1.08176-1.50611	0.004	1.20875	1.06251-1.37513	0.123	1.27665	0.96383-1.69100	0.103	1.27665	0.98042-1.66238	-0.13899	0.16809	0.982	2.3074	9	0.98562	0.01035	8	1
ebi-a-GCST90027746.csv	10	0.091	2.37754	0.98197-5.7565	0.004	1.27641	1.08122-1.50685	0.004	1.20874	1.06250-1.37511	0.091	1.27665	0.99105-1.64455	0.116	1.27665	0.96984-1.68052	-0.13899	0.16807	0.983	2.30727	9	0.98563	0.01005	8	1
ebi-a-GCST90027469.csv	93	0.147	1.33578	0.90637-1.9686	0.001	1.18465	1.07096-1.31040	0.005	1.11062	1.03149-1.19582	0.004	1.46532	1.13709-1.88829	0.002	1.4773	1.16030-1.88091	-0.0163	0.34443	0.062	114.648	92	0.05506	113.521	91	0.05511
ebi-a-GCST90027501.csv	46	0.6	1.15158	0.68165-1.9455	0.02	0.84737	0.73665-0.97473	0.005	0.87595	0.79782-0.96173	0.549	1.11456	0.78388-1.58474	0.497	1.12338	0.80500-1.56767	-0.02515	0.3044	0.33	49.0813	45	0.31289	47.9056	44	0.3173
ebi-a-GCST90027671.csv	57	0	0.4993	0.40452-0.6163	0.228	1.05807	0.96537-1.15967	0.005	0.89764	0.83205-0.96841	0.317	1.12331	0.89623-1.40792	0.261	1.11948	0.92120-1.36042	0.08355	0	<0.001	107.427	56	4e-05	67.5071	55	0.12
ebi-a-GCST90027701.csv	58	0.107	1.29416	0.95074-1.7616	0.003	0.84641	0.75842-0.94462	0.005	0.8923	0.82357-0.96676	0.157	0.83214	0.64738-1.06964	0.145	0.83214	0.65210-1.06190	-0.03899	0.01755	1	31.5793	57	0.99749	25.5899	56	0.99984
ebi-a-GCST90027572.csv	35	0.874	0.96344	0.61007-1.5215	0.018	0.83368	0.71738-0.96884	0.006	0.86084	0.77300-0.95866	0.07	0.74214	0.54276-1.01476	0.158	0.81084	0.60983-1.07810	-0.01119	0.62249	0.636	30.7823	34	0.62614	30.5353	33	0.59041
ebi-a-GCST90027659.csv	13	0.264	1.48543	0.76914-2.8688	0.002	1.39427	1.12645-1.72575	0.006	1.24584	1.06379-1.45906	0.056	1.44736	1.02715-2.03947	0.058	1.44206	1.02362-2.03155	-0.0204	0.60025	0.932	6.07313	12	0.91235	5.78201	11	0.88751
ebi-a-GCST90027668.csv	57	0.109	1.29321	0.94890-1.7625	0.003	0.84755	0.75864-0.94689	0.006	0.89291	0.82343-0.96825	0.138	0.83013	0.65123-1.05819	0.146	0.83013	0.64807-1.06334	-0.03888	0.01841	0.994	31.5251	56	0.99663	25.6219	55	0.99976
ebi-a-GCST90027454.csv	70	0.246	0.782	0.51808-1.1804	0.374	1.04659	0.94664-1.15709	0.007	1.11192	1.02955-1.20089	0.742	1.03774	0.83310-1.29264	0.748	1.03774	0.82845-1.29989	0.04213	0.09262	1	26.0687	69	1	23.1591	68	1
ebi-a-GCST90027595.csv	138	0.344	1.17462	0.84260-1.6375	0	0.87677	0.81801-0.93975	0.007	0.9284	0.87980-0.97968	0.16	0.87505	0.72717-1.05301	0.159	0.87505	0.72759-1.05240	-0.02371	0.16188	1	39.3749	137	1	37.3969	136	1
ebi-a-GCST90027770.csv	48	0.358	1.16541	0.84347-1.6102	0	1.17584	1.07816-1.28236	0.007	1.08786	1.02307-1.15676	0.033	1.25915	1.02566-1.54578	0.015	1.26964	1.05500-1.52796	-0.01005	0.67258	0.376	49.7419	47	0.36468	49.547	46	0.33365
ebi-a-GCST90027593.csv	56	0.969	0.99371	0.72444-1.3631	0.034	1.06096	1.00439-1.12072	0.008	1.05755	1.01446-1.10247	0.306	1.06214	0.94745-1.19071	0.292	1.06214	0.95040-1.18701	0.01287	0.69844	1	10.9724	55	1	10.8207	54	1
ebi-a-GCST90027816.csv	35	0.213	0.81376	0.59212-1.1184	0.277	1.063	0.95203-1.18691	0.008	1.11178	1.02845-1.20187	0.863	0.97902	0.77124-1.24280	0.867	0.97902	0.76597-1.25133	0.03996	0.05562	0.868	25.1963	34	0.86301	21.2599	33	0.94286
ebi-a-GCST90027679.csv	56	0	0.63797	0.50314-0.8089	0.092	0.91863	0.83234-1.01386	0.009	0.91215	0.85125-0.97742	0.977	0.99604	0.76483-1.29714	0.976	0.99604	0.77049-1.28762	0.04977	0.0033	0.312	58.9346	55	0.33367	49.4771	54	0.64926
ebi-a-GCST90027529.csv	17	0.994	0.9966	0.43828-2.2662	0.864	1.01761	0.83280-1.24344	0.01	1.21154	1.04659-1.40250	0.973	1.00633	0.70248-1.44163	0.982	1.0036	0.73934-1.36230	0.01816	0.64238	0.417	17.1284	16	0.37734	16.8757	15	0.32635
ebi-a-GCST90027522.csv	49	0.901	1.04649	0.51269-2.1361	0	1.64075	1.43677-1.87368	0.011	1.17688	1.03742-1.33508	0	1.65435	1.32530-2.06511	0	1.65435	1.27906-2.13977	0.01022	0.7445	<0.001	111.542	48	0	111.288	47	0
ebi-a-GCST90027547.csv	36	0.172	1.38643	0.87650-2.1930	0	1.24056	1.10514-1.39258	0.011	1.11822	1.02567-1.21911	0.038	1.29018	1.02375-1.62595	0.032	1.28651	1.03136-1.60478	-0.02347	0.35599	0.311	38.2409	35	0.32448	37.2807	34	0.32059
ebi-a-GCST90027711.csv	68	0.478	1.34394	0.59649-3.0280	0.003	1.13522	1.04258-1.23610	0.012	1.09244	1.01924-1.17091	0.201	1.14389	0.93286-1.40266	0.182	1.14507	0.94048-1.39417	-0.01873	0.61751	1	7.97624	67	1	7.72448	66	1
ebi-a-GCST90027732.csv	23	0.223	0.71336	0.42093-1.2090	0.001	1.32069	1.11534-1.56384	0.012	1.18382	1.03825-1.34981	0.021	1.52347	1.09260-2.12425	0.036	1.51359	1.05203-2.17764	0.05218	0.06646	0.114	29.8485	22	0.12219	25.3283	21	0.23322
ebi-a-GCST90027539.csv	58	0.001	2.77031	1.58028-4.8565	0	0.74605	0.66312-0.83936	0.013	0.89967	0.82757-0.97807	0.026	0.71217	0.53213-0.95310	0.023	0.70999	0.53317-0.94545	-0.09379	0.00021	0.317	61.5613	57	0.31618	45.818	56	0.83234
ebi-a-GCST90027562.csv	53	0.025	1.85638	1.09986-3.1333	0.808	1.01555	0.89659-1.15029	0.018	1.12	1.01947-1.23045	0.041	1.5955	1.03151-2.46788	0.001	1.5955	1.21555-2.09423	-0.07019	0.06023	0.002	87.8573	52	0.00138	81.9247	51	0.00389
ebi-a-GCST90027622.csv	70	0.009	0.61413	0.43142-0.8742	0.001	0.84395	0.76337-0.93303	0.019	0.91239	0.84501-0.98514	0.013	0.74493	0.59470-0.93312	0.007	0.74797	0.60836-0.91962	0.05285	0.02783	0.064	88.3665	69	0.05808	82.2544	68	0.11462
ebi-a-GCST90027646.csv	103	0.005	0.52188	0.33394-0.8156	0.039	0.91228	0.83609-0.99542	0.019	0.92294	0.86329-0.98671	0.667	0.94077	0.71321-1.24094	0.656	0.94507	0.73770-1.21072	0.05098	0.01295	0.031	130.253	102	0.03102	122.491	101	0.07179
ebi-a-GCST90027479.csv	182	0.491	0.82959	0.48795-1.4104	0.77	0.99069	0.93055-1.05472	0.02	1.05605	1.00855-1.10579	0.883	0.98641	0.82197-1.18375	0.888	0.98641	0.81511-1.19371	0.01853	0.37211	1	96.796	181	1	95.9954	180	1
ebi-a-GCST90027852.csv	57	0.046	0.49453	0.25176-0.9714	0.13	0.91531	0.81619-1.02646	0.02	0.88505	0.79837-0.98115	0.614	0.93966	0.73878-1.19516	0.615	0.94469	0.75795-1.17742	0.05848	0.09306	<0.001	101.187	56	0.00021	96.0836	55	0.00051
ebi-a-GCST90027682.csv	62	0.509	0.86827	0.57214-1.3177	0.072	1.10566	0.99118-1.23336	0.021	1.09432	1.01382-1.18121	0.381	0.87484	0.64993-1.17758	0.387	0.87205	0.64107-1.18625	0.02003	0.27316	0.832	50.673	61	0.82442	49.4498	60	0.83255
ebi-a-GCST90027452.csv	50	0.001	1.60954	1.23950-2.0901	0.304	1.03837	0.96637-1.11574	0.026	1.06001	1.00698-1.11584	0.03	1.19274	1.02232-1.39157	0.842	1.01597	0.87007-1.18632	-0.07943	0.00247	0.987	29.7946	49	0.98625	19.5811	48	0.99991
ebi-a-GCST90027606.csv	47	0.924	0.99045	0.81369-1.2056	0.092	0.95378	0.90267-1.00778	0.026	0.95492	0.91686-0.99456	0.051	0.88594	0.78677-0.99762	0.042	0.88594	0.79075-0.99259	-0.00811	0.71145	1	18.7899	46	0.99988	18.6513	45	0.99982
ebi-a-GCST90027615.csv	77	0.01	1.57178	1.12660-2.1929	0	1.31358	1.19076-1.44906	0.026	1.10351	1.01176-1.20359	0.001	1.39499	1.15888-1.67920	0.002	1.37617	1.13781-1.66446	-0.03331	0.03454	<0.001	124.762	76	0.00036	117.5	75	0.00125
ebi-a-GCST90027790.csv	89	0.032	0.59753	0.37586-0.9499	0.402	1.03111	0.95985-1.10766	0.026	1.06331	1.00733-1.12239	0.844	1.0164	0.86508-1.19418	0.841	1.0164	0.86757-1.19075	0.0639	0.01615	1	35.2689	88	1	29.2497	87	1
ebi-a-GCST90027661.csv	48	0.008	1.47939	1.12209-1.9505	0	1.14872	1.07547-1.22696	0.027	1.05317	1.00586-1.10270	0.034	1.18773	1.01821-1.38548	0.034	1.18773	1.01774-1.38612	-0.07253	0.01844	0.915	35.0698	47	0.90026	29.0993	46	0.9755
ebi-a-GCST90027493.csv	14	0.217	0.84677	0.65935-1.0875	0.266	1.05153	0.96244-1.14885	0.028	1.08203	1.00873-1.16066	0.904	1.00977	0.86487-1.17895	0.964	1.0031	0.87847-1.14540	0.06914	0.07042	0.136	19.8029	13	0.10024	14.9059	12	0.24662
ebi-a-GCST90027604.csv	72	0.028	0.67473	0.47870-0.9510	0.234	0.94134	0.85217-1.03984	0.028	0.91881	0.85188-0.99099	0.839	0.97591	0.77195-1.23376	0.821	0.97591	0.79083-1.20431	0.03085	0.07498	1	29.6109	71	1	26.3438	70	1
ebi-a-GCST90027625.csv	96	0.747	1.10029	0.61691-1.9624	0.015	1.12556	1.02368-1.23759	0.029	0.93022	0.87183-0.99252	0.275	1.15473	0.89304-1.49310	0.268	1.15052	0.89885-1.47266	-0.01374	0.56841	0.281	102.972	95	0.27061	102.614	94	0.25517
ebi-a-GCST90027792.csv	28	0.213	1.43455	0.82439-2.4963	0.008	0.85414	0.76086-0.95884	0.032	0.90412	0.82437-0.99159	0.029	0.80036	0.66262-0.96674	0.055	0.81422	0.66599-0.99544	-0.05661	0.10992	0.16	34.9503	27	0.14013	31.6189	26	0.20602
ebi-a-GCST90027838.csv	33	0.492	0.88428	0.62545-1.2502	0.019	0.87248	0.77872-0.97752	0.032	0.9051	0.82630-0.99140	0.237	0.87037	0.69447-1.09081	0.215	0.87037	0.70178-1.07946	0.00277	0.89232	0.999	11.4307	32	0.9997	11.4121	31	0.99949
ebi-a-GCST90027477.csv	77	0.07	1.26067	0.98446-1.6144	0.955	0.99849	0.94737-1.05237	0.033	0.95914	0.92304-0.99666	0.87	1.01031	0.89398-1.14178	0.862	1.01031	0.90028-1.13379	-0.04582	0.0314	0.999	42.4127	76	0.99936	37.6031	75	0.99991
ebi-a-GCST90027556.csv	26	0.264	1.50896	0.74506-3.0561	0.486	1.06388	0.89360-1.26661	0.034	1.14713	1.01034-1.30244	0.126	1.30266	0.93887-1.80742	0.487	1.1106	0.82962-1.48674	-0.02944	0.44644	0.687	21.7095	25	0.65246	21.1103	24	0.63221
ebi-a-GCST90027678.csv	29	0.477	0.772	0.38222-1.5592	0.001	0.84823	0.76778-0.93712	0.034	0.9243	0.85927-0.99426	0.166	0.85749	0.69362-1.06006	0.196	0.86508	0.69822-1.07180	0.02468	0.6178	0.479	27.6142	28	0.48502	27.3561	27	0.44472
ebi-a-GCST90027800.csv	19	0.001	3.18031	1.84108-5.4937	0.001	1.24875	1.09256-1.42728	0.034	1.12803	1.00942-1.26059	0.032	1.24848	1.03565-1.50504	0.033	1.24848	1.03364-1.50796	-0.20956	0.00154	0.062	28.6741	18	0.05251	14.4939	17	0.63189
ebi-a-GCST90027575.csv	17	0.905	1.02654	0.67360-1.5644	0.373	1.0593	0.93330-1.20231	0.038	1.11236	1.00590-1.23009	0.359	0.88454	0.68571-1.14102	0.481	0.88743	0.64178-1.22712	0.01753	0.70543	0.026	28.6519	16	0.02639	28.3711	15	0.01936
ebi-a-GCST90027628.csv	23	0.749	0.92325	0.56946-1.4969	0.026	1.20379	1.02267-1.41699	0.038	1.13988	1.00719-1.29004	0.096	1.27486	0.96926-1.67682	0.1	1.26815	0.96680-1.66342	0.02439	0.3865	0.999	7.26233	22	0.99864	6.48018	21	0.99896
ebi-a-GCST90027515.csv	34	0.178	1.40725	0.86555-2.2880	0.002	1.17385	1.06087-1.29887	0.039	1.08512	1.00405-1.17274	0.082	1.20702	0.98277-1.48244	0.087	1.2048	0.97982-1.48144	-0.03736	0.29622	0.998	14.2956	33	0.99811	13.1679	32	0.99868
ebi-a-GCST90027581.csv	57	0.206	0.56843	0.23920-1.3508	0.011	1.17777	1.03805-1.33629	0.041	1.10338	1.00413-1.21244	0.189	1.20186	0.91682-1.57552	0.173	1.20186	0.92562-1.56053	0.0525	0.13661	0.08	71.6662	56	0.07739	68.8111	55	0.09979
ebi-a-GCST90027774.csv	64	0.086	1.6459	0.94016-2.8814	0	0.69792	0.62741-0.77636	0.041	0.89232	0.79977-0.99557	0	0.66482	0.54966-0.80412	0	0.66482	0.54702-0.80800	-0.06112	0.03287	<0.001	163.596	63	0	151.923	62	0
ebi-a-GCST90027663.csv	50	0.036	0.57446	0.34767-0.9492	0.543	0.96481	0.85955-1.08297	0.042	0.91502	0.83987-0.99689	0.802	1.03405	0.79658-1.34230	0.786	1.03405	0.81303-1.31514	0.04499	0.07137	0.791	41.3314	49	0.77364	37.9313	48	0.85093
ebi-a-GCST90027737.csv	50	0.036	0.57447	0.34759-0.9494	0.553	0.96488	0.85743-1.08581	0.042	0.91504	0.83990-0.99691	0.818	1.03399	0.77903-1.37240	0.803	1.03399	0.79634-1.34257	0.04499	0.0715	0.764	41.3328	49	0.77359	37.9358	48	0.8508
ebi-a-GCST90027664.csv	74	0.325	1.20992	0.83001-1.7637	0.006	1.15381	1.04208-1.27751	0.044	1.07907	1.00202-1.16205	0.174	1.17253	0.93415-1.47175	0.164	1.16904	0.94007-1.45378	-0.01075	0.54569	1	35.2161	73	0.99995	34.8476	72	0.99994
ebi-a-GCST90027616.csv	30	0.004	1.5829	1.18843-2.1083	0.009	1.20454	1.04796-1.38452	0.047	1.10882	1.00151-1.22762	0.045	1.35986	1.01982-1.81326	0.038	1.35496	1.03092-1.78086	-0.04613	0.01508	0.341	31.3943	29	0.34708	24.6881	28	0.64475
ebi-a-GCST90027687.csv	50	0.009	1.44041	1.10701-1.8742	0.005	1.09589	1.02802-1.16825	0.047	1.04676	1.00059-1.09506	0.026	1.18827	1.02511-1.37740	0.026	1.18827	1.02508-1.37744	-0.06726	0.01972	0.891	37.5959	49	0.8824	31.7768	48	0.96566
ebi-a-GCST90027484.csv	38	0.947	1.01187	0.71785-1.4263	0.232	1.07855	0.95284-1.22083	0.048	1.09235	1.00076-1.19232	0.499	1.08608	0.85702-1.37636	0.397	1.09728	0.88721-1.35710	0.00914	0.65408	0.743	31.779	37	0.7121	31.5748	36	0.67905
ebi-a-GCST90027693.csv	76	0.351	1.19423	0.82403-1.7307	0.004	1.15343	1.04688-1.27082	0.054	1.07472	0.99884-1.15636	0.172	1.17404	0.93448-1.47503	0.166	1.17053	0.93880-1.45946	-0.00994	0.57163	1	35.9704	75	0.99996	35.6476	74	0.99995
ebi-a-GCST90027692.csv	10	0.827	1.0365	0.75915-1.4152	0.129	1.0637	0.98224-1.15191	0.056	1.06405	0.99840-1.13402	0.234	1.08291	0.95820-1.22385	0.327	1.06326	0.94677-1.19409	0.00703	0.87025	1	1.16974	9	0.99894	1.1413	8	0.99719
ebi-a-GCST90027761.csv	10	0.826	1.0362	0.76222-1.4087	0.121	1.06356	0.98379-1.14980	0.056	1.06396	0.99840-1.13383	0.233	1.0822	0.95883-1.22145	0.313	1.063	0.95038-1.18896	0.0071	0.86735	0.999	1.17044	9	0.99893	1.1407	8	0.99719
ebi-a-GCST90027785.csv	186	0.1	1.25521	0.95898-1.6430	0.054	1.02863	0.99956-1.05855	0.056	1.02124	0.99943-1.04354	0.505	1.02768	0.94857-1.11339	0.501	1.02833	0.94814-1.11529	-0.04502	0.13358	1	29.5578	185	1	27.2874	184	1
ebi-a-GCST90027513.csv	60	0.062	0.72569	0.52169-1.0095	0.005	0.84451	0.75034-0.95051	0.057	0.92223	0.84842-1.00246	0.06	0.73685	0.53925-1.00684	0.053	0.7448	0.55609-0.99755	0.02477	0.14668	0.939	42.281	59	0.95069	40.117	58	0.96459
ebi-a-GCST90027807.csv	28	0.865	0.96868	0.67321-1.3938	0.214	0.94102	0.85494-1.03577	0.06	0.93092	0.86398-1.00305	0.514	0.93634	0.77051-1.13786	0.475	0.93753	0.78748-1.11617	-0.0062	0.82849	1	7.12722	27	0.99995	7.07933	26	0.99992
ebi-a-GCST90027550.csv	134	0.637	1.04308	0.87588-1.2422	0.466	0.97865	0.92346-1.03714	0.064	0.95785	0.91510-1.00260	0.859	0.98523	0.83629-1.16070	0.829	0.98326	0.84390-1.14563	-0.01222	0.32362	1	33.7358	133	1	32.7542	132	1
ebi-a-GCST90027580.csv	17	0.5	1.14693	0.77756-1.6918	0.817	0.98885	0.89929-1.08733	0.066	0.93355	0.86753-1.00460	0.025	0.78672	0.65021-0.95190	0.976	1.00218	0.87253-1.15109	-0.04384	0.3073	0.259	19.4667	16	0.2452	18.1177	15	0.25653
ebi-a-GCST90027684.csv	13	0.031	0.54093	0.33231-0.8805	0.018	1.34746	1.05295-1.72436	0.067	1.20145	0.98745-1.46183	0.059	1.54754	1.02636-2.33339	0.052	1.51126	1.03804-2.20022	0.09191	0.00561	0.233	15.616	12	0.20947	3.84455	11	0.97425
ebi-a-GCST90027745.csv	13	0.031	0.54072	0.33212-0.8803	0.022	1.34796	1.04350-1.74127	0.067	1.20148	0.98747-1.46186	0.055	1.54744	1.03555-2.31236	0.059	1.51116	1.02600-2.22575	0.09196	0.00561	0.265	15.615	12	0.20951	3.84134	11	0.97433
ebi-a-GCST90027496.csv	17	0.046	1.41244	1.03469-1.9281	0.039	1.107	1.00517-1.21914	0.068	1.07158	0.99485-1.15422	0.164	1.13292	0.95809-1.33965	0.134	1.13503	0.96989-1.32829	-0.06621	0.09346	0.991	5.67016	16	0.99128	2.46183	15	0.99988
ebi-a-GCST90027532.csv	34	0.372	1.09646	0.89842-1.3382	0.064	0.94156	0.88337-1.00359	0.068	0.95639	0.91165-1.00331	0.281	0.93791	0.83639-1.05175	0.294	0.93843	0.83503-1.05463	-0.03964	0.17548	1	6.50258	33	1	4.58297	32	1
ebi-a-GCST90027819.csv	85	0.726	1.10072	0.64425-1.8806	0.073	1.07227	0.99364-1.15711	0.069	1.0547	0.99589-1.11698	0.509	1.0723	0.87225-1.31824	0.457	1.0723	0.89288-1.28778	-0.00405	0.87547	0.823	71.4343	84	0.83407	71.4096	83	0.81403
ebi-a-GCST90027756.csv	12	0.028	0.63074	0.44353-0.8970	0.764	0.98512	0.89336-1.08629	0.07	1.09296	0.99272-1.20332	0.822	0.98432	0.86049-1.12596	0.746	0.98288	0.88758-1.08841	0.14593	0.01077	0.018	24.0075	11	0.0127	12.1435	10	0.27557
ebi-a-GCST90027767.csv	31	0.02	2.31599	1.18818-4.5143	0	0.81266	0.75338-0.87661	0.071	0.93853	0.87608-1.00543	0.004	0.80416	0.70213-0.92102	0.003	0.80416	0.70474-0.91761	-0.1662	0.01246	0.001	60.8411	30	0.00073	48.8758	29	0.0119
ebi-a-GCST90027453.csv	100	0.059	1.49424	0.98925-2.2570	0.11	0.93537	0.86170-1.01534	0.075	0.94694	0.89179-1.00551	0.198	1.15336	0.92933-1.43140	0.192	1.14893	0.93385-1.41354	-0.03961	0.03082	0.998	63.2653	99	0.99803	58.4646	98	0.99948
ebi-a-GCST90027591.csv	102	0.108	1.33008	0.94268-1.8767	0.002	0.89694	0.83715-0.96098	0.076	0.95411	0.90581-1.00498	0.014	0.74064	0.58580-0.93640	0.023	0.74492	0.57974-0.95715	-0.04338	0.05864	<0.001	158.823	101	0.00021	153.217	100	0.0005
ebi-a-GCST90027803.csv	14	0.649	1.09789	0.74216-1.6241	0.046	0.86889	0.75692-0.99743	0.077	0.89623	0.79390-1.01176	0.063	0.77435	0.60516-0.99083	0.116	0.8256	0.66071-1.03165	-0.05083	0.30665	0.013	26.6834	13	0.01374	24.3682	12	0.01812
ebi-a-GCST90027599.csv	135	0.648	1.02019	0.93643-1.1114	0.283	0.98244	0.95116-1.01475	0.078	0.97726	0.95261-1.00254	0.748	0.98535	0.90065-1.07802	0.747	0.98535	0.90120-1.07737	-0.00941	0.30461	1	15.8796	134	1	14.8175	133	1
ebi-a-GCST90027537.csv	10	0.118	2.31606	0.90565-5.9230	0.05	0.78637	0.61827-1.00018	0.081	0.85419	0.71574-1.01942	0.15	0.71543	0.47156-1.08541	0.127	0.71387	0.48181-1.05770	-0.09335	0.06682	0.76	5.68276	9	0.7712	1.18823	8	0.99676
ebi-a-GCST90027589.csv	47	0.968	1.00989	0.62936-1.6205	0.002	1.14468	1.05119-1.24649	0.083	1.05512	0.99294-1.12119	0.226	0.86523	0.68646-1.09056	0.101	1.21255	0.96779-1.51921	0.00549	0.85553	0.567	44.6186	46	0.53019	44.585	45	0.48942
ebi-a-GCST90027769.csv	62	0.004	0.68004	0.52979-0.8729	0.293	0.9503	0.86419-1.04500	0.092	0.9424	0.87952-1.00976	0.866	0.98078	0.78418-1.22668	0.8	0.9713	0.77584-1.21601	0.03926	0.00987	0.955	43.1878	61	0.95919	36.0842	60	0.99387
ebi-a-GCST90027464.csv	47	0.03	0.5877	0.36938-0.9351	0	1.27321	1.14487-1.41593	0.093	1.06884	0.98895-1.15518	0.068	1.28067	0.98768-1.66059	0.115	1.28067	0.94725-1.73146	0.05941	0.01388	0.96	31.2439	46	0.95266	24.6884	45	0.99406
ebi-a-GCST90027466.csv	14	0.022	0.46343	0.26109-0.8226	0.284	1.13382	0.90090-1.42695	0.095	1.16282	0.97405-1.38817	0.841	1.04227	0.70176-1.54801	0.883	1.02868	0.71188-1.48647	0.08926	0.00671	0.244	16.3069	13	0.23295	5.61912	12	0.93405
ebi-a-GCST90027843.csv	17	0.887	1.04688	0.56309-1.9463	0.193	1.0889	0.95779-1.23795	0.097	1.09243	0.98411-1.21267	0.454	1.08866	0.87631-1.35246	0.43	1.08866	0.88619-1.33738	0.00699	0.89319	1	3.19634	16	0.99974	3.17769	15	0.99943
ebi-a-GCST90027451.csv	21	0.921	0.95746	0.41162-2.2271	0.064	0.84091	0.70012-1.01003	0.108	0.8969	0.78557-1.02401	0.198	0.81192	0.59757-1.10317	0.176	0.79571	0.57802-1.09538	-0.00602	0.87953	0.746	15.4807	20	0.74827	15.4571	19	0.69314
ebi-a-GCST90027483.csv	15	0.822	0.89029	0.32944-2.4059	0.126	0.85577	0.70109-1.04458	0.113	0.885	0.76087-1.02939	0.327	0.8397	0.59935-1.17644	0.312	0.83539	0.59689-1.16918	-0.00052	0.9907	0.843	8.84058	14	0.84113	8.84044	13	0.78488
ebi-a-GCST90027656.csv	17	0.116	1.61725	0.91861-2.8472	0.886	0.98654	0.81944-1.18771	0.114	1.11148	0.97491-1.26718	0.801	0.9555	0.67500-1.35256	0.779	0.94664	0.64941-1.37991	-0.04323	0.20149	0.613	13.8202	16	0.61211	12.0355	15	0.67634
ebi-a-GCST90027742.csv	17	0.116	1.61738	0.91861-2.8477	0.888	0.98654	0.81669-1.19171	0.114	1.11148	0.97491-1.26718	0.803	0.95549	0.67220-1.35816	0.782	0.94664	0.64571-1.38779	-0.04324	0.20145	0.592	13.8203	16	0.6121	12.0353	15	0.67636
ebi-a-GCST90027559.csv	6	0.294	0.63248	0.30039-1.3317	0.586	0.95188	0.79708-1.13675	0.116	0.89653	0.78241-1.02730	0.742	0.95654	0.74445-1.22905	0.705	0.95507	0.76265-1.19603	0.06659	0.40311	0.594	4.15645	5	0.52712	3.28381	4	0.5115
ebi-a-GCST90027647.csv	106	0.028	0.78181	0.62974-0.9706	0.576	1.02401	0.94236-1.11273	0.116	1.04919	0.98822-1.11393	0.039	1.27282	1.01502-1.59609	0.037	1.27282	1.01756-1.59211	0.03259	0.00657	0.993	74.1264	105	0.99029	66.4313	104	0.99846
ebi-a-GCST90027535.csv	51	0.033	0.56574	0.33994-0.9415	0.018	1.17261	1.02731-1.33845	0.117	1.08155	0.98062-1.19288	0.077	1.34458	0.97548-1.85335	0.103	1.32228	0.95052-1.83943	0.0619	0.01445	0.195	58.103	50	0.20154	51.3609	49	0.38136
ebi-a-GCST90027473.csv	37	0.153	0.69592	0.42786-1.1319	0	1.37581	1.18589-1.59614	0.118	1.09704	0.97674-1.23215	0.025	1.44239	1.06107-1.96074	0.037	1.44239	1.03547-2.00922	0.0418	0.0678	0.092	47.9928	36	0.08724	43.5709	35	0.15167
ebi-a-GCST90027723.csv	37	0.583	0.89562	0.60627-1.3231	0.212	0.9437	0.86168-1.03352	0.125	0.94963	0.88898-1.01442	0.491	0.93669	0.77914-1.12609	0.492	0.93669	0.77887-1.12648	0.00894	0.76711	1	11.597	36	0.99996	11.5079	35	0.99994
ebi-a-GCST90027449.csv	71	0.933	0.99037	0.79087-1.2402	0.523	1.01821	0.96337-1.07617	0.128	0.96893	0.93033-1.00913	0.035	0.8651	0.75780-0.98759	0.436	1.053	0.92551-1.19805	-0.00394	0.84682	1	38.8607	70	0.99907	38.8231	69	0.99875
ebi-a-GCST90027696.csv	108	0.01	1.29996	1.06950-1.5801	0.688	0.98976	0.94134-1.04068	0.128	0.97058	0.93396-1.00864	0.856	0.98787	0.86648-1.12628	0.863	0.98922	0.87465-1.11879	-0.04697	0.00343	1	27.3703	107	1	18.4093	106	1
ebi-a-GCST90027716.csv	35	0.234	0.56929	0.22881-1.4164	0.002	1.30178	1.10313-1.53619	0.128	1.11016	0.97049-1.26994	0.043	1.57492	1.03149-2.40466	0.066	1.56892	0.98655-2.49507	0.05527	0.15608	0.019	53.2712	34	0.01882	50.0742	33	0.02876
ebi-a-GCST90027509.csv	45	0.305	1.18152	0.86234-1.6189	0.002	1.18356	1.06556-1.31461	0.129	1.06004	0.98320-1.14290	0.057	1.25139	0.99948-1.56679	0.079	1.25139	0.97997-1.59799	-0.01602	0.49053	0.96	28.8561	44	0.96209	28.3725	43	0.95808
ebi-a-GCST90027518.csv	14	0.27	1.53746	0.74166-3.1872	0.863	1.0206	0.80983-1.28624	0.13	0.87453	0.73516-1.04031	0.781	1.06263	0.69907-1.61526	0.712	1.06976	0.75346-1.51883	-0.05228	0.14538	0.326	15.2735	13	0.29059	12.7059	12	0.39077
ebi-a-GCST90027857.csv	35	0.847	0.9712	0.72363-1.3035	0.038	0.91055	0.83326-0.99502	0.13	0.95321	0.89586-1.01422	0.24	0.89106	0.73766-1.07635	0.237	0.89106	0.73862-1.07496	-0.00306	0.89936	0.809	27.0148	34	0.79696	26.9985	33	0.75974
ebi-a-GCST90027724.csv	37	0.884	1.02124	0.77205-1.3508	0.004	1.13988	1.04230-1.24659	0.133	1.05395	0.98414-1.12870	0.288	0.87046	0.67630-1.12037	0.275	0.8749	0.69081-1.10806	0.00575	0.82092	0.026	55.7308	36	0.01899	55.6481	35	0.01468
ebi-a-GCST90027468.csv	17	0.816	0.91971	0.46018-1.8381	0.379	1.05754	0.93353-1.19803	0.136	1.07505	0.97756-1.18227	0.675	1.05305	0.83069-1.33493	0.173	1.19704	0.93483-1.53280	0.02359	0.66182	0.207	20.3629	16	0.20432	20.0961	15	0.16828
ebi-a-GCST90027613.csv	38	0.573	1.13013	0.74169-1.7220	0.213	0.91792	0.80218-1.05037	0.142	0.92964	0.84346-1.02463	0.04	0.73276	0.55025-0.97580	0.037	0.73529	0.55617-0.97211	-0.01883	0.35647	0.657	32.7673	37	0.66779	31.8947	36	0.66425
ebi-a-GCST90027654.csv	56	0.773	1.07767	0.64997-1.7868	0.11	0.91397	0.81845-1.02065	0.144	0.93995	0.86500-1.02139	0.481	0.91198	0.70695-1.17647	0.481	0.91198	0.70697-1.17645	-0.01272	0.59325	1	16.9273	55	1	16.6385	54	1
ebi-a-GCST90027740.csv	56	0.773	1.07763	0.64990-1.7869	0.106	0.91396	0.81951-1.01931	0.144	0.93994	0.86499-1.02139	0.463	0.91197	0.71420-1.16450	0.468	0.91197	0.71228-1.16763	-0.01272	0.59339	1	16.9272	55	1	16.6386	54	1
ebi-a-GCST90027797.csv	39	0.247	0.58508	0.23958-1.4288	0.002	1.29505	1.10084-1.52353	0.144	1.09651	0.96903-1.24076	0.069	1.54705	0.97951-2.44343	0.068	1.54119	0.98199-2.41884	0.05202	0.17224	0.023	57.0869	38	0.02403	54.2461	37	0.03343
ebi-a-GCST90027851.csv	11	0.883	1.03512	0.66197-1.6186	0.194	1.06284	0.96944-1.16525	0.144	1.05517	0.98186-1.13394	0.368	1.06826	0.93121-1.22547	0.392	1.06576	0.92687-1.22547	0.00439	0.93395	0.997	2.00649	10	0.99629	1.99923	9	0.99148
ebi-a-GCST90027528.csv	16	0.632	1.37537	0.38436-4.9215	0.006	1.43736	1.10939-1.86229	0.145	1.18642	0.94257-1.49337	0.031	1.69231	1.09847-2.60719	0.043	1.62838	1.05621-2.51052	-0.01293	0.82046	0.051	25.6199	15	0.04221	25.5224	14	0.02975
ebi-a-GCST90027728.csv	10	0.164	1.59027	0.87884-2.8776	0.551	0.94937	0.80047-1.12597	0.146	0.91192	0.80536-1.03258	0.703	0.95301	0.74990-1.21114	0.714	0.95301	0.74253-1.22316	-0.08033	0.09704	0.46	9.09914	9	0.42817	5.56805	8	0.69549
ebi-a-GCST90027773.csv	27	0.812	1.07201	0.60842-1.8888	0.591	0.97254	0.87857-1.07656	0.147	0.93924	0.86290-1.02234	0.843	0.97806	0.78664-1.21606	0.826	0.97806	0.80450-1.18906	-0.02266	0.64745	0.058	38.2757	26	0.05708	37.9504	25	0.04678
ebi-a-GCST90027465.csv	42	0.223	0.74308	0.46447-1.1888	0.085	1.08529	0.98877-1.19123	0.148	1.05507	0.98124-1.13446	0.331	1.10181	0.90816-1.33676	0.343	1.09874	0.90630-1.33206	0.04957	0.14672	0.999	20.242	41	0.9973	18.0517	40	0.99891
ebi-a-GCST90027630.csv	41	0.733	0.81225	0.24787-2.6616	0.048	0.88714	0.78788-0.99890	0.15	0.93209	0.84691-1.02584	0.221	0.84623	0.65030-1.10117	0.215	0.84431	0.64883-1.09869	0.01177	0.82083	1	10.8937	40	1	10.8417	39	1
ebi-a-GCST90027854.csv	29	0	6.56275	2.94277-14.6357	0.392	1.0799	0.90572-1.28758	0.151	1.11394	0.96146-1.29061	0.05	1.61553	1.02001-2.55872	0.075	1.61553	0.97179-2.68568	-0.17455	0.00016	0.003	53.397	28	0.00264	31.2231	27	0.26208
ebi-a-GCST90027558.csv	152	0.538	1.0512	0.89696-1.2319	0.82	0.99355	0.93956-1.05064	0.155	0.9704	0.93108-1.01138	0.012	0.7264	0.56785-0.92922	0.004	0.7264	0.58665-0.89944	-0.01199	0.30783	0.003	199.724	151	0.00485	198.339	150	0.00501
ebi-a-GCST90027653.csv	95	0.851	0.9779	0.77551-1.2331	0.647	1.01581	0.94982-1.08640	0.159	0.96632	0.92138-1.01346	0.379	1.08613	0.90437-1.30441	0.412	1.08613	0.89252-1.32174	-0.00168	0.91828	0.976	69.4433	94	0.97297	69.4327	93	0.96786
ebi-a-GCST90027517.csv	22	0.177	1.62392	0.82306-3.2040	0.148	1.15711	0.94959-1.40998	0.163	1.10878	0.95889-1.28210	0.139	1.33305	0.92446-1.92223	0.148	1.30956	0.92065-1.86274	-0.03732	0.27326	0.876	13.9541	21	0.87156	12.6849	20	0.89049
ebi-a-GCST90027640.csv	156	0	2.65924	2.01928-3.5020	0.775	0.98929	0.91896-1.06501	0.168	1.03667	0.98497-1.09108	0.057	1.46883	0.99119-2.17665	0.076	0.76098	0.56403-1.02671	-0.09556	0	0.142	174.614	155	0.134	128.209	154	0.93601
ebi-a-GCST90027710.csv	21	0.617	0.82994	0.40454-1.7027	0.457	1.06701	0.89950-1.26570	0.168	1.09284	0.96315-1.23999	0.316	1.17399	0.86458-1.59413	0.363	1.14415	0.86188-1.51887	0.02575	0.45516	0.958	10.3632	20	0.9611	9.78189	19	0.95812
ebi-a-GCST90027839.csv	48	0.025	0.66213	0.46742-0.9379	0.971	1.00197	0.90103-1.11423	0.168	0.94771	0.87804-1.02292	0.288	1.13224	0.90273-1.42009	0.273	1.12272	0.91518-1.37733	0.04189	0.04423	0.614	44.2054	47	0.58901	39.9261	46	0.72345
ebi-a-GCST90027514.csv	41	0.003	2.08326	1.33206-3.2581	0.19	1.0763	0.96424-1.20138	0.17	1.05717	0.97652-1.14449	0.244	0.84888	0.64714-1.11351	0.229	0.85133	0.65754-1.10223	-0.0995	0.00443	0.768	33.5072	40	0.75607	24.3812	39	0.96753
ebi-a-GCST90027764.csv	106	0.016	1.28516	1.05073-1.5719	0.701	0.98974	0.93897-1.04325	0.171	0.97329	0.93627-1.01178	0.849	0.9875	0.86793-1.12353	0.858	0.98875	0.87389-1.11872	-0.04497	0.0069	1	25.7569	105	1	18.1576	104	1
ebi-a-GCST90027776.csv	35	0.238	1.38477	0.81454-2.3542	0.883	0.99146	0.88471-1.11110	0.171	1.05882	0.97568-1.14905	0.845	0.97489	0.75700-1.25549	0.838	0.97489	0.76514-1.24214	-0.03357	0.32305	0.587	31.6809	34	0.58179	30.6745	33	0.5834
ebi-a-GCST90027482.csv	32	0.749	0.93706	0.63167-1.3901	0.275	1.07968	0.94087-1.23898	0.174	1.07108	0.97010-1.18257	0.47	1.10343	0.84762-1.43644	0.51	1.0938	0.84057-1.42333	0.01518	0.49777	0.962	18.5301	31	0.9623	18.0591	30	0.95757
ebi-a-GCST90027660.csv	88	0.468	1.22032	0.71437-2.0846	0.092	1.07212	0.98874-1.16254	0.188	1.03866	0.98165-1.09897	0.47	1.07144	0.88926-1.29094	0.446	1.07144	0.89804-1.27832	-0.01524	0.55454	0.667	80.5309	87	0.67445	80.1789	86	0.65657
ebi-a-GCST90027686.csv	88	0.468	1.22039	0.71438-2.0848	0.089	1.07212	0.98932-1.16185	0.188	1.03866	0.98166-1.09896	0.43	1.07149	0.90319-1.27116	0.474	1.07149	0.88775-1.29327	-0.01525	0.55442	0.711	80.5309	87	0.67445	80.1787	86	0.65658
ebi-a-GCST90027734.csv	88	0.469	1.22052	0.71315-2.0889	0.097	1.07204	0.98754-1.16377	0.188	1.03861	0.98165-1.09888	0.444	1.07148	0.89855-1.27769	0.478	1.07148	0.88613-1.29561	-0.01527	0.55544	0.703	80.5321	87	0.67442	80.1817	86	0.65649
ebi-a-GCST90027747.csv	88	0.468	1.2203	0.71433-2.0846	0.088	1.07212	0.98968-1.16144	0.188	1.03866	0.98165-1.09897	0.465	1.07149	0.89117-1.28829	0.486	1.07149	0.88299-1.30022	-0.01524	0.55461	0.693	80.5309	87	0.67445	80.1791	86	0.65657
ebi-a-GCST90027752.csv	88	0.467	1.22063	0.71462-2.0849	0.084	1.07212	0.99081-1.16011	0.188	1.03866	0.98166-1.09897	0.485	1.0714	0.88360-1.29912	0.471	1.0714	0.88887-1.29142	-0.01527	0.55385	0.657	80.5306	87	0.67446	80.1773	86	0.65662
ebi-a-GCST90027844.csv	59	0.004	0.47943	0.29492-0.7794	0.338	1.04773	0.95236-1.15266	0.192	1.04518	0.97808-1.11689	0.089	0.81309	0.64312-1.02797	0.538	1.07956	0.84753-1.37511	0.08471	0.00243	0.844	47.6781	58	0.83123	37.6074	57	0.97788
ebi-a-GCST90027555.csv	18	0.292	1.49151	0.72706-3.0597	0.804	0.97668	0.81052-1.17690	0.193	0.90598	0.78075-1.05130	0.926	0.98459	0.71414-1.35747	0.924	0.98459	0.71871-1.34884	-0.04855	0.18357	0.976	7.62957	17	0.97384	5.69753	16	0.99105
ebi-a-GCST90027787.csv	40	0.403	0.82924	0.53706-1.2804	0.395	1.03129	0.96058-1.10721	0.194	1.03802	0.98120-1.09814	0.699	1.0309	0.88458-1.20144	0.67	1.02959	0.90137-1.17606	0.03235	0.31332	1	12.233	39	0.99999	11.1888	38	0.99999
ebi-a-GCST90027760.csv	6	0.935	1.10704	0.11060-11.0805	0.026	1.21516	1.02380-1.44228	0.195	1.10433	0.95042-1.28317	0.15	1.2178	0.97046-1.52816	0.135	1.2178	0.98065-1.51229	-0.00072	0.99843	0.32	6.41184	5	0.26818	6.41183	4	0.17043
ebi-a-GCST90027543.csv	27	0.001	0.4062	0.25603-0.6444	0.945	1.00536	0.86471-1.16889	0.2	0.93566	0.84517-1.03585	0.426	1.16059	0.80867-1.66568	0.432	1.151	0.81478-1.62597	0.09337	0.00126	0.537	25.0174	26	0.51799	11.8188	25	0.98797
ebi-a-GCST90027655.csv	23	0.388	0.80434	0.49545-1.3058	0.472	1.052	0.91619-1.20794	0.203	1.06593	0.96604-1.17614	0.071	1.33953	0.99052-1.81150	0.679	0.94482	0.72480-1.23162	0.03901	0.25794	0.343	24.0586	22	0.34417	22.6031	21	0.3655
ebi-a-GCST90027741.csv	23	0.388	0.80441	0.49556-1.3057	0.479	1.05198	0.91441-1.21026	0.203	1.06592	0.96604-1.17612	0.065	1.33957	0.99702-1.79981	0.697	0.94486	0.71298-1.25215	0.039	0.25796	0.337	24.0586	22	0.34416	22.6033	21	0.36549
ebi-a-GCST90027677.csv	23	0.388	0.80433	0.49587-1.3047	0.473	1.05186	0.91624-1.20755	0.204	1.06589	0.96601-1.17609	0.079	1.33954	0.98190-1.82746	0.685	0.94473	0.72074-1.23835	0.03901	0.25715	0.357	24.0605	22	0.34407	22.6002	21	0.36566
ebi-a-GCST90027697.csv	32	0.4	1.26759	0.73575-2.1839	0.25	1.08141	0.94645-1.23560	0.206	1.0688	0.96415-1.18481	0.521	1.08593	0.84660-1.39291	0.524	1.08593	0.84531-1.39504	-0.01524	0.5361	1	8.49566	31	0.99998	8.10388	30	0.99998
ebi-a-GCST90027512.csv	25	0.004	0.25021	0.10743-0.5827	0.677	1.04443	0.85130-1.28137	0.21	1.13228	0.93243-1.37497	0.026	1.88249	1.11489-3.17857	0.928	1.01957	0.67395-1.54243	0.14655	0.00165	<0.001	73.2338	24	0	47.1799	23	0.00213
ebi-a-GCST90027666.csv	71	0.002	0.5306	0.36058-0.7808	0.003	0.85914	0.77637-0.95074	0.21	0.95448	0.88741-1.02661	0.178	0.84725	0.66732-1.07569	0.158	0.84725	0.67474-1.06386	0.06106	0.0034	0.998	39.2225	70	0.99892	30.0195	69	0.99999
ebi-a-GCST90027791.csv	45	0.822	0.96396	0.70104-1.3255	0.623	0.97808	0.89540-1.06839	0.218	0.9593	0.89793-1.02486	0.698	0.96138	0.78914-1.17121	0.677	0.96367	0.81053-1.14575	-0.00064	0.9758	0.987	25.8483	44	0.98673	25.8474	43	0.98218
ebi-a-GCST90027500.csv	31	0.096	1.39509	0.95489-2.0382	0.316	0.96472	0.89932-1.03488	0.219	0.96615	0.91459-1.02062	0.547	0.96405	0.85685-1.08467	0.462	0.95843	0.85716-1.07166	-0.07655	0.06502	0.194	36.6213	30	0.18843	32.4991	29	0.2984
ebi-a-GCST90027830.csv	33	0.703	1.08058	0.72823-1.6034	0.22	1.06421	0.96344-1.17551	0.219	1.04806	0.97254-1.12944	0.138	1.15048	0.96056-1.37795	0.165	1.14668	0.94959-1.38468	-0.00432	0.87815	0.999	11.0879	32	0.99978	11.064	31	0.99963
ebi-a-GCST90027570.csv	21	0.744	0.90719	0.50936-1.6158	0.602	1.05296	0.86729-1.27837	0.221	1.0903	0.94946-1.25203	0.313	1.22814	0.83205-1.81278	0.575	0.91609	0.67776-1.23823	0.01847	0.52789	0.574	18.4415	20	0.55835	18.028	19	0.52057
ebi-a-GCST90027632.csv	15	0.312	1.44401	0.72833-2.8630	0.893	0.98887	0.83989-1.16428	0.227	1.07952	0.95346-1.22223	0.692	0.94801	0.73163-1.22837	0.716	0.95184	0.73328-1.23554	-0.03435	0.41224	0.855	8.6105	14	0.85516	7.89284	13	0.85051
ebi-a-GCST90027643.csv	5	0.79	2.92732	0.00213-4032.5032	0.301	1.18361	0.86008-1.62883	0.228	1.17751	0.90260-1.53616	0.604	1.13423	0.73118-1.75945	0.55	1.14915	0.75686-1.74478	-0.07406	0.82077	0.969	0.53181	4	0.97033	0.47075	3	0.92527
ebi-a-GCST90027569.csv	14	0.571	0.75777	0.29809-1.9263	0.207	0.86729	0.69528-1.08186	0.229	0.90595	0.77125-1.06417	0.23	0.77769	0.52607-1.14965	0.194	0.7732	0.53520-1.11703	0.01587	0.70991	0.823	8.35131	13	0.81998	8.2062	12	0.76882
ebi-a-GCST90027568.csv	29	0.134	1.91153	0.84108-4.3443	0.719	0.97053	0.82483-1.14197	0.23	0.93066	0.82770-1.04643	0.974	1.0052	0.73374-1.37709	0.993	0.99844	0.72010-1.38437	-0.06715	0.09394	0.781	22.2284	28	0.77061	19.2142	27	0.86207
ebi-a-GCST90027750.csv	64	0.962	0.98747	0.59021-1.6521	0.087	0.91742	0.83123-1.01255	0.23	0.95385	0.88307-1.03030	0.404	0.91072	0.73226-1.13268	0.396	0.91072	0.73479-1.12878	-0.00316	0.89429	1	15.9502	63	1	15.9324	62	1
ebi-a-GCST90027855.csv	70	0.261	0.86708	0.67739-1.1099	0.326	0.95832	0.88034-1.04322	0.234	0.96237	0.90343-1.02515	0.655	0.95569	0.78415-1.16477	0.649	0.95569	0.78716-1.16031	0.01111	0.39482	1	28.7518	69	1	28.0185	68	1
ebi-a-GCST90027446.csv	18	0.959	1.02118	0.46141-2.2601	0.059	1.22558	0.99250-1.51339	0.235	1.10158	0.93907-1.29221	0.202	1.29073	0.88532-1.88179	0.194	1.28333	0.89395-1.84231	0.00673	0.85104	0.837	11.5142	17	0.82862	11.4778	16	0.77908
ebi-a-GCST90027782.csv	27	0.312	1.10022	0.91779-1.3189	0.801	0.99107	0.92421-1.06277	0.236	0.96913	0.92011-1.02076	0.893	1.01005	0.87438-1.16677	0.863	1.01186	0.88640-1.15509	-0.03436	0.16537	0.134	33.6249	26	0.14473	31.0857	25	0.1862
ebi-a-GCST90027447.csv	29	0.418	0.85236	0.58250-1.2473	0.827	1.01871	0.86247-1.20326	0.253	1.07057	0.95254-1.20323	0.996	0.99906	0.70374-1.41831	0.894	0.97555	0.67986-1.39985	0.02256	0.22819	0.546	26.3204	28	0.55544	24.8	27	0.58567
ebi-a-GCST90027579.csv	119	0.453	1.14818	0.80140-1.6450	0.021	1.0848	1.01224-1.16257	0.255	1.03215	0.97740-1.08996	0.421	1.08466	0.89061-1.32099	0.414	1.08466	0.89322-1.31713	-0.01038	0.558	1	32.4549	118	1	32.1098	117	1
ebi-a-GCST90027799.csv	39	0.676	0.87533	0.47127-1.6258	0.278	0.94289	0.84780-1.04863	0.257	0.95575	0.88378-1.03358	0.112	0.80555	0.62102-1.04490	0.094	0.80324	0.62552-1.03145	0.01199	0.78068	0.909	26.9238	38	0.91018	26.8452	37	0.89073
ebi-a-GCST90027627.csv	18	0.814	0.89247	0.35192-2.2633	0.055	1.16286	0.99662-1.35682	0.258	1.07192	0.95044-1.20893	0.236	1.16913	0.91125-1.49999	0.234	1.17169	0.91092-1.50711	0.02253	0.7023	0.947	8.911	17	0.94301	8.75957	16	0.92298
ebi-a-GCST90027488.csv	44	0.119	0.72726	0.49110-1.0770	0.404	0.95329	0.85190-1.06676	0.261	0.95427	0.87952-1.03538	0.494	1.09216	0.85035-1.40273	0.477	1.09216	0.85830-1.38974	0.03695	0.17294	1	14.3701	43	0.99999	12.448	42	1
ebi-a-GCST90027657.csv	77	0.669	0.92685	0.65512-1.3113	0.597	0.97392	0.88305-1.07413	0.261	1.0414	0.97021-1.11782	0.355	0.88408	0.68206-1.14594	0.298	0.88137	0.69597-1.11616	0.0105	0.50339	0.916	59.7849	76	0.91424	59.3328	75	0.90751
ebi-a-GCST90027611.csv	22	0.81	1.07123	0.61508-1.8657	0.105	1.16645	0.96837-1.40506	0.263	1.0864	0.93962-1.25612	0.329	1.18515	0.84919-1.65404	0.318	1.195	0.84935-1.68132	0.00127	0.95946	1	5.02456	21	0.99986	5.02191	20	0.99971
ebi-a-GCST90027486.csv	57	0	0.35409	0.25968-0.4828	0.382	0.97648	0.92569-1.03005	0.267	1.02444	0.98170-1.06903	0.565	0.96919	0.87171-1.07757	0.581	0.97105	0.87536-1.07719	0.21568	0	0.161	66.6503	56	0.15603	20.8426	55	0.99999
ebi-a-GCST90027460.csv	63	0.062	1.62127	0.98596-2.6659	0	0.78848	0.69848-0.89009	0.277	0.95202	0.87127-1.04025	0.056	0.73571	0.54002-1.00232	0.044	0.73844	0.55323-0.98566	-0.05664	0.03719	0.079	77.8698	62	0.08414	72.4777	61	0.14921
ebi-a-GCST90027617.csv	27	0.25	0.74142	0.45054-1.2201	0.442	1.06479	0.90727-1.24965	0.277	1.06329	0.95186-1.18777	0.097	1.30156	0.96403-1.75728	0.754	1.04203	0.80730-1.34503	0.04278	0.15806	0.624	23.4974	26	0.60468	21.3798	25	0.67125
ebi-a-GCST90027755.csv	57	0.707	1.03139	0.87843-1.2110	0.118	1.05143	0.98729-1.11974	0.281	1.02345	0.98125-1.06747	0.268	1.08751	0.93879-1.25980	0.205	1.10066	0.95067-1.27431	-0.0015	0.92249	0.622	51.876	56	0.63165	51.8665	55	0.59511
ebi-a-GCST90027828.csv	65	0.777	1.03264	0.82803-1.2878	0.016	1.09181	1.01623-1.17300	0.281	1.02839	0.97733-1.08211	0.372	1.08286	0.91020-1.28827	0.375	1.08286	0.90945-1.28934	-0.00073	0.97007	0.382	66.7037	64	0.3842	66.7022	63	0.35096
ebi-a-GCST90027832.csv	79	0	0.56443	0.43092-0.7393	0.001	0.83885	0.75871-0.92747	0.282	1.0497	0.96093-1.14667	0.068	0.7945	0.62278-1.01358	0.038	0.79756	0.64643-0.98402	0.06576	1e-05	<0.001	157.636	78	0	122.39	77	0.00077
ebi-a-GCST90027564.csv	20	0.572	0.81983	0.41653-1.6136	0.131	1.14318	0.96080-1.36018	0.284	1.0746	0.94205-1.22580	0.122	1.37087	0.93596-2.00787	0.123	1.33361	0.94030-1.89144	0.02792	0.4348	0.154	25.2	19	0.15406	24.3372	18	0.14429
ebi-a-GCST90027670.csv	124	0.296	1.10718	0.91532-1.3393	0.298	1.02435	0.97899-1.07180	0.284	1.01966	0.98397-1.05664	0.842	1.01215	0.89874-1.13987	0.862	0.98922	0.87543-1.11780	-0.0116	0.38962	1	67.723	123	0.99999	66.9776	122	0.99999
ebi-a-GCST90027795.csv	10	0.612	0.74455	0.24887-2.2275	0.78	0.97784	0.83585-1.14395	0.288	0.93847	0.83468-1.05518	0.997	0.99954	0.78683-1.26976	0.952	0.99259	0.78562-1.25408	0.0591	0.68806	0.502	7.89788	9	0.54447	7.72448	8	0.46084
ebi-a-GCST90027644.csv	34	0.392	0.83747	0.56089-1.2504	0.045	0.85315	0.73048-0.99642	0.292	0.93753	0.83151-1.05707	0.074	0.74994	0.55217-1.01856	0.074	0.74664	0.54745-1.01830	0.01319	0.56666	0.193	40.2405	33	0.18034	39.8233	32	0.16113
ebi-a-GCST90027780.csv	40	0.002	0.3788	0.21289-0.6740	0.041	0.86289	0.74899-0.99410	0.3	0.94927	0.86021-1.04754	0.311	0.84724	0.61755-1.16235	0.31	0.84352	0.60978-1.16687	0.09844	0.003	0.481	39.3396	39	0.45467	29.2841	38	0.84382
ebi-a-GCST90027765.csv	42	0.397	1.16063	0.82536-1.6321	0.79	0.98533	0.88377-1.09855	0.306	0.95924	0.88580-1.03876	0.629	1.0552	0.84986-1.31014	0.599	1.06064	0.85330-1.31836	-0.01918	0.26649	0.983	23.5463	41	0.98686	22.2763	40	0.98949
ebi-a-GCST90027621.csv	29	0.626	1.17484	0.61918-2.2292	0.398	0.9333	0.79522-1.09536	0.31	0.9417	0.83862-1.05746	0.887	1.02227	0.75752-1.37954	0.973	1.00545	0.73872-1.36849	-0.02286	0.49702	0.293	31.5493	28	0.29324	31.0049	27	0.27094
ebi-a-GCST90027805.csv	24	0.077	0.71437	0.50098-1.0187	0.149	0.92736	0.83711-1.02733	0.315	0.96196	0.89190-1.03753	0.436	0.91858	0.74449-1.13337	0.384	0.91368	0.74838-1.11549	0.05219	0.10664	0.974	12.1778	23	0.96764	9.34744	22	0.99132
ebi-a-GCST90027456.csv	5	0.467	0.63242	0.21486-1.8615	0.476	0.90381	0.68432-1.19369	0.321	0.89112	0.70967-1.11895	0.332	0.80999	0.55709-1.17771	0.894	0.97478	0.68425-1.38868	0.04534	0.56947	0.941	0.83964	4	0.93306	0.43402	3	0.93313
ebi-a-GCST90027608.csv	26	0.167	1.81604	0.79861-4.1297	0.909	0.99111	0.84979-1.15592	0.321	0.94228	0.83786-1.05970	1	0.99993	0.74701-1.33848	1	0.99993	0.72280-1.38330	-0.05435	0.12684	0.992	12.1329	25	0.98547	9.63153	24	0.99591
ebi-a-GCST90027650.csv	53	0.083	1.48646	0.95726-2.3082	0.054	1.1436	0.99787-1.31062	0.322	1.04842	0.95476-1.15126	0.434	1.15927	0.80256-1.67453	0.475	1.15481	0.78032-1.70903	-0.03462	0.11798	0.327	56.3524	52	0.31546	53.6904	51	0.3716
ebi-a-GCST90027554.csv	32	0.202	0.70408	0.41571-1.1925	0.158	1.11264	0.95949-1.29023	0.328	1.05859	0.94445-1.18653	0.411	1.13404	0.84362-1.52444	0.419	1.13699	0.83646-1.54551	0.03709	0.13071	0.993	13.9693	31	0.99634	11.5549	30	0.99903
ebi-a-GCST90027485.csv	17	0.917	1.07087	0.30362-3.7769	0.515	0.94201	0.78712-1.12738	0.338	0.93091	0.80410-1.07772	0.738	0.94708	0.69235-1.29552	0.733	0.94541	0.68835-1.29845	-0.01175	0.82938	0.999	3.48556	16	0.99954	3.43747	15	0.99908
ebi-a-GCST90027624.csv	28	0.475	1.08826	0.86583-1.3678	0.886	0.99344	0.90799-1.08693	0.344	0.96948	0.90913-1.03383	0.84	0.98121	0.81807-1.17689	0.809	0.97916	0.82668-1.15977	-0.02298	0.3114	0.504	26.5027	27	0.49086	25.4369	26	0.49437
ebi-a-GCST90027813.csv	20	0.679	1.20933	0.49822-2.9354	0.476	1.06613	0.89406-1.27132	0.344	1.06534	0.93452-1.21448	0.848	1.03524	0.72982-1.46848	0.895	1.02481	0.71621-1.46636	-0.01142	0.78006	0.419	19.3683	19	0.43345	19.2822	18	0.37464
ebi-a-GCST90027511.csv	24	0.215	1.43125	0.82490-2.4833	0.356	1.05673	0.93999-1.18797	0.365	0.95909	0.87613-1.04989	0.461	1.08652	0.87460-1.34978	0.38	1.09227	0.90047-1.32491	-0.05789	0.16322	0.078	32.7941	23	0.08472	29.96	22	0.11944
ebi-a-GCST90027597.csv	53	0.828	1.0286	0.79821-1.3255	0.299	0.97108	0.91872-1.02643	0.365	0.98203	0.94429-1.02129	0.573	0.96568	0.85586-1.08958	0.541	0.96568	0.86412-1.07917	-0.00847	0.71845	0.406	53.7864	52	0.40576	53.6482	51	0.37312
ebi-a-GCST90027619.csv	25	0.074	1.71992	0.97567-3.0319	0.448	1.04525	0.93227-1.17192	0.397	1.03791	0.95233-1.13117	0.705	1.04064	0.84896-1.27559	0.631	1.0507	0.86092-1.28232	-0.06881	0.09055	0.998	10.2023	24	0.99366	7.08108	23	0.9994
ebi-a-GCST90027722.csv	39	0.468	1.09403	0.86030-1.3913	0.492	1.02656	0.95257-1.10630	0.406	0.97812	0.92839-1.03052	0.541	1.04899	0.90113-1.22112	0.512	1.05114	0.90671-1.21856	-0.02146	0.35556	0.878	27.9977	38	0.88271	27.1224	37	0.88309
ebi-a-GCST90027743.csv	80	0.776	0.95236	0.68173-1.3304	0.733	0.98245	0.88758-1.08747	0.411	1.02955	0.96046-1.10361	0.352	0.88755	0.69127-1.13956	0.332	0.88755	0.69851-1.12775	0.00706	0.64175	0.954	58.0749	79	0.96289	57.8567	78	0.95751
ebi-a-GCST90027552.csv	46	0.238	0.67131	0.34965-1.2889	0.489	1.0485	0.91679-1.19913	0.413	0.96027	0.87139-1.05822	0.522	1.09317	0.83388-1.43308	0.525	1.09737	0.82594-1.45798	0.03758	0.2826	0.968	29.7349	45	0.9613	28.5515	44	0.96553
ebi-a-GCST90027602.csv	65	0.212	1.46063	0.81027-2.6330	0.053	1.11843	0.99853-1.25273	0.415	0.95154	0.84439-1.07228	0.279	1.13394	0.90491-1.42094	0.23	1.12781	0.92855-1.36981	-0.04001	0.1506	<0.001	171.167	64	0	165.601	63	0
ebi-a-GCST90027530.csv	25	0.008	4.97006	1.69483-14.5746	0.076	0.85197	0.71399-1.01660	0.416	0.94661	0.82932-1.08048	0.105	0.73024	0.50637-1.05309	0.13	0.73549	0.50070-1.08037	-0.14355	0.00584	0.106	32.1851	24	0.12247	22.9538	23	0.46347
ebi-a-GCST90027573.csv	28	0.185	1.46285	0.84626-2.5287	0.728	1.02872	0.87710-1.20656	0.427	1.04916	0.93209-1.18094	0.883	1.0231	0.75745-1.38191	0.764	0.95715	0.72077-1.27105	-0.03526	0.23372	0.999	10.792	27	0.99766	9.30562	26	0.99892
ebi-a-GCST90027837.csv	10	0.69	1.2471	0.43811-3.5499	0.279	1.16042	0.88616-1.51956	0.428	1.09575	0.87413-1.37355	0.453	1.16606	0.79450-1.71139	0.473	1.1699	0.77562-1.76461	-0.01245	0.80965	0.189	12.0799	9	0.20884	11.987	8	0.15178
ebi-a-GCST90027459.csv	40	0.418	1.24871	0.73375-2.1251	0.305	0.91946	0.78325-1.07935	0.429	0.94047	0.80780-1.09494	0.724	0.91352	0.55454-1.50487	0.815	1.03771	0.76309-1.41115	-0.029	0.28244	<0.001	122.874	39	0	119.147	38	0
ebi-a-GCST90027694.csv	21	0.695	1.14398	0.59017-2.2175	0.675	0.96203	0.80275-1.15293	0.431	0.94946	0.83449-1.08026	0.767	0.95577	0.71125-1.28434	0.765	0.95577	0.71328-1.28068	-0.01645	0.58019	0.552	18.9282	20	0.52649	18.6116	19	0.482
ebi-a-GCST90027563.csv	15	0.174	0.81445	0.61575-1.0773	0.258	0.94397	0.85421-1.04316	0.442	0.96449	0.87950-1.05769	0.593	0.95294	0.80178-1.13259	0.5	0.95065	0.82378-1.09707	0.04107	0.23253	0.073	22.9572	14	0.06097	20.4859	13	0.08374
ebi-a-GCST90027834.csv	53	0.006	0.79736	0.68200-0.9322	0.059	0.95509	0.91064-1.00171	0.453	0.98679	0.95313-1.02165	0.128	0.92154	0.83085-1.02213	0.124	0.9202	0.82903-1.02139	0.04861	0.0084	0.92	37.3944	52	0.93657	29.8756	51	0.99205
ebi-a-GCST90027450.csv	37	0.865	1.03752	0.68000-1.5830	0.299	0.92756	0.80489-1.06892	0.455	0.96242	0.87041-1.06415	0.716	0.94712	0.70822-1.26661	0.625	0.93748	0.72525-1.21182	-0.0069	0.72184	0.819	28.4999	36	0.80891	28.3711	35	0.77863
ebi-a-GCST90027680.csv	37	0.104	1.37628	0.94556-2.0032	0.218	1.05535	0.96858-1.14990	0.46	1.02432	0.96112-1.09166	0.4	1.07505	0.91003-1.27000	0.349	1.09108	0.91120-1.30648	-0.04557	0.12659	0.999	16.0294	36	0.99837	13.5803	35	0.99958
ebi-a-GCST90027835.csv	33	0.435	1.47588	0.56243-3.8729	0.887	1.00811	0.90160-1.12722	0.461	1.03336	0.94707-1.12751	0.944	1.00762	0.81698-1.24276	0.953	1.00609	0.82265-1.23042	-0.03497	0.47261	1	9.19123	32	0.99997	8.66252	31	0.99997
ebi-a-GCST90027775.csv	33	0.839	0.94325	0.53953-1.6491	0.442	1.05818	0.91602-1.22240	0.462	0.9612	0.86494-1.06817	0.399	1.13154	0.85244-1.50203	0.466	1.11368	0.83692-1.48196	0.00187	0.94674	0.891	22.4465	32	0.895	22.442	31	0.86864
ebi-a-GCST90027809.csv	37	0.11	1.36907	0.94089-1.9921	0.232	1.05513	0.96617-1.15229	0.462	1.02422	0.96095-1.09165	0.421	1.07522	0.90290-1.28044	0.313	1.09129	0.92329-1.28986	-0.04471	0.13281	0.999	16.0351	36	0.99837	13.6668	35	0.99955
ebi-a-GCST90027544.csv	57	0.004	1.34517	1.11079-1.6290	0.325	1.03988	0.96196-1.12410	0.475	0.97996	0.92698-1.03596	0.312	1.07907	0.93239-1.24883	0.291	1.08191	0.93616-1.25035	-0.05424	0.0013	0.898	42.5784	56	0.90695	31.0941	55	0.99615
ebi-a-GCST90027806.csv	40	0.558	1.07348	0.84864-1.3579	0.443	1.02749	0.95866-1.10126	0.483	0.98177	0.93264-1.03350	0.501	1.05295	0.90742-1.22182	0.469	1.0551	0.91392-1.21808	-0.01705	0.45011	0.882	28.7095	39	0.8868	28.1272	38	0.87909
ebi-a-GCST90027779.csv	41	0.089	0.71265	0.48717-1.0425	0.136	1.09507	0.97170-1.23411	0.485	1.03224	0.94428-1.12839	0.346	1.11929	0.88779-1.41116	0.349	1.11929	0.88643-1.41333	0.03911	0.05672	0.969	26.529	40	0.9497	22.6729	39	0.98292
ebi-a-GCST90027817.csv	86	0.512	0.88231	0.60795-1.2805	0.467	1.02465	0.95957-1.09414	0.493	1.0175	0.96824-1.06927	0.734	1.02515	0.88862-1.18265	0.747	1.02515	0.88226-1.19117	0.01651	0.45116	1	14.9648	85	1	14.3918	84	1
ebi-a-GCST90027499.csv	19	0.21	1.37903	0.85074-2.2354	0.367	0.93984	0.82126-1.07554	0.494	0.96057	0.85593-1.07800	0.56	0.92625	0.71948-1.19244	0.634	0.94667	0.75820-1.18199	-0.05323	0.14991	0.115	25.0649	18	0.12314	22.1075	17	0.18062
ebi-a-GCST90027457.csv	17	0.628	1.17487	0.62034-2.2251	0.367	0.90905	0.73886-1.11845	0.498	0.94239	0.79375-1.11886	0.531	0.87404	0.57858-1.32038	0.486	0.88606	0.63523-1.23594	-0.02315	0.49255	0.12	23.1121	16	0.11077	22.374	15	0.09837
ebi-a-GCST90027545.csv	43	0.031	0.50091	0.27266-0.9202	0.023	0.83371	0.71256-0.97546	0.5	0.95842	0.84709-1.08439	0.099	0.71579	0.48529-1.05575	0.12	0.73638	0.50466-1.07448	0.05764	0.03905	0.004	70.8705	42	0.00351	63.7982	41	0.01281
ebi-a-GCST90027712.csv	17	0.039	0.45244	0.22774-0.8989	0.107	0.849	0.69591-1.03577	0.5	0.94333	0.79616-1.11770	0.296	0.85633	0.64634-1.13453	0.297	0.85246	0.63775-1.13945	0.07629	0.04808	0.224	20.8146	16	0.18575	15.9039	15	0.38847
ebi-a-GCST90027497.csv	10	0.277	0.47123	0.13292-1.6706	0.433	1.10186	0.86443-1.40450	0.502	1.06962	0.87862-1.30213	0.563	1.12081	0.77218-1.62683	0.525	1.12603	0.79230-1.60033	0.07067	0.23471	0.896	4.36074	9	0.88611	2.70927	8	0.95126
ebi-a-GCST90027542.csv	34	0.391	0.78513	0.45513-1.3544	0.831	0.98532	0.86041-1.12836	0.511	0.96593	0.87100-1.07121	0.983	1.00297	0.77039-1.30578	0.995	1.00086	0.76966-1.30151	0.01975	0.45357	1	9.5626	33	0.99998	8.98694	32	0.99998
ebi-a-GCST90027759.csv	26	0.68	0.89113	0.51881-1.5307	0.487	1.0573	0.90370-1.23699	0.511	1.0379	0.92891-1.15968	0.443	1.14155	0.81834-1.59241	0.496	1.13806	0.78849-1.64261	0.01712	0.57771	0.558	23.1902	25	0.56646	22.8716	24	0.52739
ebi-a-GCST90027574.csv	27	0.174	1.49083	0.85201-2.6086	0.548	1.04916	0.89706-1.22705	0.519	0.96339	0.86015-1.07901	0.779	1.04088	0.78950-1.37230	0.672	1.05138	0.83586-1.32247	-0.04285	0.13088	0.468	26.0855	26	0.45841	23.646	25	0.53989
ebi-a-GCST90027523.csv	7	0.272	1.71571	0.72819-4.0424	0.773	1.03062	0.83941-1.26538	0.521	1.05412	0.89743-1.23817	0.775	1.05303	0.75078-1.47695	0.932	1.01433	0.74096-1.38855	-0.07563	0.30849	0.322	7.02964	6	0.31811	5.59299	5	0.34786
ebi-a-GCST90027766.csv	35	0.099	0.79549	0.61090-1.0359	0.658	1.02675	0.91338-1.15419	0.524	1.02896	0.94246-1.12340	0.174	1.18109	0.93397-1.49360	0.401	0.90711	0.72441-1.13588	0.0289	0.05094	0.998	13.7949	34	0.99918	9.69144	33	0.99997
ebi-a-GCST90027846.csv	40	0.811	1.56302	0.04129-59.1704	0.386	1.04236	0.94912-1.14477	0.524	1.0252	0.94961-1.10680	0.649	1.04319	0.87093-1.24951	0.669	1.04319	0.86037-1.26485	-0.05104	0.82123	1	0.61182	39	1	0.56005	38	1
ebi-a-GCST90027601.csv	13	0.302	1.52918	0.70876-3.2993	0.252	0.88259	0.71273-1.09293	0.531	0.93788	0.76740-1.14624	0.427	0.84666	0.56911-1.25957	0.484	0.90399	0.68741-1.18879	-0.07479	0.22409	0.016	25.6415	12	0.01206	22.2799	11	0.02229
ebi-a-GCST90027505.csv	15	0.024	4.56071	1.41772-14.6716	0.783	0.96268	0.73464-1.26150	0.539	1.09541	0.81890-1.46530	0.231	0.75245	0.48231-1.17389	0.226	0.7477	0.47664-1.17292	-0.13747	0.02925	<0.001	45.6252	14	3e-05	31.2192	13	0.00313
ebi-a-GCST90027721.csv	29	0.001	6.20461	2.46006-15.6489	0.016	0.86508	0.76856-0.97372	0.539	1.02635	0.94453-1.11526	0.15	1.29095	0.92029-1.81090	0.315	0.84216	0.60611-1.17015	-0.24707	0.0007	0.258	32.3707	28	0.25969	17.7365	27	0.91137
ebi-a-GCST90027794.csv	19	0.334	1.32196	0.76273-2.2912	0.942	0.99349	0.83231-1.18588	0.54	1.04003	0.91743-1.17901	0.356	0.8546	0.61758-1.18258	0.424	0.88018	0.64848-1.19465	-0.02426	0.39219	0.495	17.7792	18	0.47028	17.008	17	0.45382
ebi-a-GCST90027725.csv	38	0.07	1.41026	0.98260-2.0241	0.23	1.05322	0.96773-1.14625	0.546	1.01959	0.95735-1.08588	0.425	1.07455	0.90215-1.27991	0.31	1.09244	0.92308-1.29287	-0.0496	0.08238	0.998	16.9364	37	0.99809	13.7434	36	0.99971
ebi-a-GCST90027820.csv	21	0.708	0.88966	0.48646-1.6270	0.544	1.05662	0.88430-1.26252	0.547	1.05253	0.89090-1.24348	0.097	1.60666	0.94213-2.73992	0.221	0.83983	0.64057-1.10108	0.02234	0.57619	<0.001	49.527	20	0.00026	48.6979	19	0.0002
ebi-a-GCST90027634.csv	65	0.578	0.91172	0.65955-1.2603	0.255	0.96342	0.90355-1.02725	0.549	0.98516	0.93816-1.03452	0.286	0.92894	0.81216-1.06250	0.31	0.92677	0.80118-1.07204	0.01187	0.63682	1	23.2031	64	1	22.978	63	1
ebi-a-GCST90027596.csv	52	0.188	1.2658	0.89537-1.7895	0.542	0.97696	0.90635-1.05306	0.561	0.98327	0.92891-1.04082	0.873	0.98662	0.83739-1.16245	0.883	0.98831	0.84534-1.15546	-0.04287	0.15344	1	22.0171	51	0.99987	19.916	50	0.99996
ebi-a-GCST90027475.csv	63	0	2.56286	1.66665-3.9410	0.014	0.8833	0.80040-0.97477	0.574	1.02563	0.93906-1.12018	0.151	0.86385	0.70917-1.05228	0.137	0.86065	0.70817-1.04596	-0.09968	8e-05	<0.001	126.693	62	0	97.8336	61	0.00193
ebi-a-GCST90027582.csv	27	0.154	0.67718	0.40297-1.1380	0.762	0.97445	0.82429-1.15196	0.577	1.03287	0.92194-1.15716	0.741	0.94805	0.69367-1.29570	0.735	0.95463	0.73193-1.24508	0.04021	0.11486	0.633	23.3342	26	0.61398	20.6652	25	0.71112
ebi-a-GCST90027700.csv	9	0.693	0.79735	0.27089-2.3470	0.299	1.15613	0.87936-1.52003	0.579	0.92688	0.70887-1.21195	0.334	1.27025	0.80487-2.00473	0.402	1.23872	0.77118-1.98970	0.01793	0.78511	0.028	17.8331	8	0.02251	17.6309	7	0.01375
ebi-a-GCST90027814.csv	41	0.641	1.06596	0.81643-1.3918	0.824	0.98857	0.89323-1.09409	0.58	0.97901	0.90809-1.05547	0.906	0.98947	0.83081-1.17842	0.905	0.98947	0.83301-1.17532	-0.0149	0.51836	1	6.5726	40	1	6.14777	39	1
ebi-a-GCST90027566.csv	24	0.697	1.09624	0.69489-1.7294	0.744	0.97145	0.81638-1.15597	0.59	0.96616	0.85235-1.09518	0.095	0.71401	0.48851-1.04360	0.099	0.73081	0.51107-1.04504	-0.01272	0.57784	0.487	22.4371	23	0.49401	22.1163	22	0.45297
ebi-a-GCST90027778.csv	51	0.076	1.42466	0.97151-2.0892	0.979	1.00198	0.86757-1.15722	0.599	1.03014	0.92209-1.15086	0.174	1.21563	0.92106-1.60442	0.121	1.21447	0.95396-1.54611	-0.03536	0.08917	1	5.18224	50	1	2.17481	49	1
ebi-a-GCST90027524.csv	28	0.734	0.93545	0.63921-1.3690	0.91	0.99165	0.85730-1.14706	0.609	0.9713	0.86886-1.08582	0.941	0.99025	0.76519-1.28149	0.934	0.99025	0.78668-1.24648	0.00461	0.84116	0.971	14.7105	27	0.9733	14.6695	26	0.96308
ebi-a-GCST90027623.csv	64	0.403	0.82417	0.52547-1.2927	0.578	1.02797	0.93288-1.13275	0.616	1.01767	0.95029-1.08984	0.727	0.95953	0.76161-1.20887	0.824	0.97343	0.76896-1.23228	0.01979	0.35639	0.936	47.1281	63	0.9323	46.2647	62	0.93227
ebi-a-GCST90027631.csv	33	0.014	2.33318	1.23329-4.4140	0.857	1.01467	0.86610-1.18873	0.617	0.96432	0.83621-1.11206	0.602	0.92123	0.67905-1.24978	0.663	1.06655	0.80038-1.42124	-0.08929	0.00929	0.007	55.8956	32	0.00557	44.7781	31	0.05216
ebi-a-GCST90027492.csv	37	0.251	0.67155	0.34403-1.3109	0.782	1.01926	0.89020-1.16702	0.63	1.02462	0.92813-1.13113	0.969	0.99485	0.76682-1.29068	0.917	0.98688	0.77067-1.26375	0.04274	0.21895	0.988	19.7382	36	0.98732	18.1713	35	0.99155
ebi-a-GCST90027836.csv	35	0.062	1.43968	0.99414-2.0849	0.153	1.10466	0.96366-1.26629	0.631	1.02659	0.92244-1.14249	0.51	1.10462	0.82388-1.48104	0.569	1.10462	0.78690-1.55062	-0.04643	0.07124	0.151	42.1545	34	0.15895	38.139	33	0.24711
ebi-a-GCST90027758.csv	66	0.008	0.76051	0.62435-0.9264	0.042	0.90708	0.82569-0.99648	0.64	0.98449	0.92201-1.05121	0.394	0.90257	0.71433-1.14042	0.407	0.90037	0.70385-1.15176	0.04748	0.00842	0.999	33.3114	65	0.99962	25.9177	64	0.99999
ebi-a-GCST90027531.csv	18	0.712	1.10852	0.64718-1.8987	0.586	1.05521	0.86967-1.28033	0.642	1.03532	0.89425-1.19865	0.374	1.16697	0.83747-1.62612	0.29	1.18632	0.87298-1.61212	-0.00724	0.79926	0.979	7.11602	17	0.982	7.04916	16	0.9723
ebi-a-GCST90027607.csv	18	0.13	0.47626	0.19160-1.1838	0.994	0.99898	0.77406-1.28927	0.648	0.95245	0.77288-1.17373	0.144	0.68191	0.41803-1.11235	0.612	1.13806	0.69695-1.85834	0.06951	0.14562	0.049	28.171	17	0.04298	24.5766	16	0.07765
ebi-a-GCST90027698.csv	43	0.907	1.02924	0.63599-1.6656	0.742	0.97986	0.86815-1.10595	0.652	1.0216	0.93102-1.12099	0.475	0.89993	0.67582-1.19836	0.433	0.89993	0.69304-1.16858	-0.00071	0.97551	0.999	16.2771	42	0.99988	16.2761	41	0.99981
ebi-a-GCST90027541.csv	69	0	0.44047	0.30213-0.6421	0.452	1.04129	0.93708-1.15710	0.665	1.01645	0.94400-1.09446	0.307	1.16124	0.87366-1.54348	0.266	1.19064	0.87777-1.61502	0.07387	4e-05	0.985	44.0774	68	0.98924	24.4175	67	1
ebi-a-GCST90027526.csv	26	0.56	0.84694	0.48825-1.4691	0.117	1.13306	0.96936-1.32442	0.669	1.02643	0.91060-1.15698	0.263	1.21184	0.87205-1.68403	0.292	1.20528	0.85772-1.69367	0.01846	0.49022	0.979	12.7736	25	0.97916	12.2826	24	0.97653
ebi-a-GCST90027534.csv	12	0.28	0.42934	0.10070-1.8305	0.847	1.02508	0.79700-1.31843	0.678	1.03931	0.86638-1.24676	0.629	1.1144	0.72723-1.70770	0.581	1.12731	0.74609-1.70331	0.07603	0.25614	0.482	10.418	11	0.49323	8.96727	10	0.53521
ebi-a-GCST90027689.csv	75	0.004	0.75239	0.62300-0.9087	0.027	0.90765	0.83284-0.98918	0.699	0.98776	0.92802-1.05135	0.393	0.90638	0.72447-1.13398	0.404	0.90638	0.72050-1.14022	0.05083	0.00374	1	38.9282	74	0.99974	29.9558	73	1
ebi-a-GCST90027731.csv	20	0.646	0.77344	0.26312-2.2735	0.556	1.04297	0.90667-1.19976	0.704	1.02141	0.91567-1.13935	0.696	1.0506	0.82338-1.34053	0.664	1.05185	0.84052-1.31632	0.04634	0.61755	1	2.68419	19	1	2.42602	18	0.99999
ebi-a-GCST90027801.csv	18	0.522	0.79821	0.40660-1.5670	0.609	0.96649	0.84811-1.10139	0.714	1.01825	0.92430-1.12174	0.731	0.95862	0.75638-1.21494	0.734	0.96059	0.76433-1.20724	0.03401	0.485	0.83	11.6846	17	0.81885	11.1736	16	0.79865
ebi-a-GCST90027567.csv	23	0.304	1.3924	0.75209-2.5779	0.135	0.85281	0.69226-1.05059	0.715	0.97164	0.83255-1.13396	0.245	0.81151	0.57587-1.14356	0.312	0.82525	0.57356-1.18741	-0.04328	0.25012	0.72	17.8864	22	0.7127	16.4875	21	0.74166
ebi-a-GCST90027818.csv	22	0.462	1.60047	0.46853-5.4671	0.001	1.2726	1.10462-1.46614	0.725	1.02388	0.89754-1.16800	0.047	1.31247	1.01910-1.69030	0.153	1.32565	0.91296-1.92490	-0.0901	0.4817	<0.001	55.7317	21	6e-05	54.3353	20	5e-05
ebi-a-GCST90027635.csv	50	0.301	0.7869	0.50202-1.2334	0.347	0.95547	0.86889-1.05068	0.731	0.98813	0.92310-1.05773	0.144	1.16543	0.95238-1.42614	0.15	1.16382	0.94956-1.42642	0.03083	0.32014	0.998	23.6761	49	0.99916	22.667	48	0.9993
ebi-a-GCST90027565.csv	57	0.787	1.11505	0.50767-2.4491	0.026	1.15864	1.01808-1.31860	0.75	1.01771	0.91337-1.13398	0.044	1.47455	1.01837-2.13508	0.024	1.45428	1.06065-1.99400	-0.00869	0.81913	<0.001	106.029	56	6e-05	105.927	55	4e-05
ebi-a-GCST90027665.csv	20	0.967	1.01438	0.51861-1.9841	0.692	0.96383	0.80326-1.15650	0.752	0.97894	0.85796-1.11698	0.785	0.95525	0.69053-1.32144	0.77	0.95525	0.70581-1.29284	-0.00317	0.91679	0.79	14.0869	19	0.7786	14.0757	18	0.72414
ebi-a-GCST90027448.csv	7	0.907	0.1953	0.00000-41885248376.8580	0.836	0.98861	0.88684-1.10206	0.753	0.986	0.90316-1.07644	0.879	0.98879	0.86002-1.13685	0.878	0.98879	0.86119-1.13530	0.65397	0.90793	1	0.02232	6	1	0.00753	5	1
ebi-a-GCST90027733.csv	14	0.21	2.22292	0.68224-7.2428	0.005	1.26912	1.07669-1.49593	0.753	1.0248	0.87981-1.19369	0.112	1.27136	0.96489-1.67516	0.224	1.27136	0.87942-1.83798	-0.15953	0.21962	0.006	28.9592	13	0.00663	25.4075	12	0.01301
ebi-a-GCST90027610.csv	10	0.393	0.63044	0.23176-1.7149	0.988	1.00182	0.78657-1.27597	0.757	1.0289	0.85905-1.23233	0.936	0.985	0.68828-1.40965	0.958	0.9901	0.69210-1.41641	0.04952	0.35794	0.643	7.18789	9	0.61756	6.23651	8	0.62076
ebi-a-GCST90027594.csv	120	0.113	0.6277	0.35431-1.1120	0.005	0.88543	0.81346-0.96378	0.758	0.98819	0.91611-1.06593	0.008	0.7087	0.55149-0.91071	0.001	0.7087	0.58522-0.85822	0.04136	0.11933	<0.001	247.941	119	0	242.874	118	0
ebi-a-GCST90027600.csv	73	0	1.59363	1.24397-2.0416	0.172	0.94969	0.88192-1.02268	0.762	1.0098	0.94803-1.07559	0.333	0.92962	0.80281-1.07645	0.356	0.93852	0.82083-1.07307	-0.06966	0.0004	<0.001	120.224	72	0.00032	100.666	71	0.01182
ebi-a-GCST90027584.csv	23	0.227	0.75517	0.48511-1.1756	0.803	0.98171	0.84892-1.13526	0.769	0.98434	0.88615-1.09342	0.832	1.03117	0.77968-1.36377	0.869	1.02269	0.78588-1.33086	0.03327	0.24037	0.872	14.5597	22	0.88043	13.0997	21	0.90509
ebi-a-GCST90027826.csv	72	0.733	1.01796	0.91926-1.1273	0.684	1.00889	0.96681-1.05280	0.779	0.99565	0.96583-1.02638	0.975	1.00161	0.90570-1.10767	0.861	1.00828	0.91968-1.10541	-0.00546	0.65676	0.914	55.3065	71	0.91493	55.1073	70	0.9038
ebi-a-GCST90027519.csv	55	0.006	0.60168	0.42402-0.8538	0.061	0.88718	0.78286-1.00540	0.78	0.98723	0.90217-1.08030	0.116	0.79244	0.59559-1.05436	0.133	0.79022	0.58398-1.06929	0.05024	0.00588	0.989	33.3132	54	0.98798	25.0753	53	0.99961
ebi-a-GCST90027520.csv	73	0.934	0.99071	0.79608-1.2329	0.613	0.9886	0.94561-1.03355	0.78	0.99492	0.96001-1.03109	0.772	0.98512	0.89059-1.08968	0.783	0.98512	0.88591-1.09544	0.00092	0.96939	1	11.4595	72	1	11.4581	71	1
ebi-a-GCST90027729.csv	21	0.286	0.57727	0.21668-1.5380	0.955	0.99572	0.85888-1.15436	0.782	0.98329	0.87283-1.10772	0.986	0.99764	0.77015-1.29232	0.986	0.99764	0.77360-1.28656	0.05626	0.29661	1	2.55296	20	1	1.40114	19	1
ebi-a-GCST90027470.csv	47	0.731	0.83639	0.30420-2.2996	0.059	1.12783	0.99555-1.27770	0.787	0.98735	0.90024-1.08289	0.255	1.17448	0.89347-1.54387	0.274	1.17769	0.88151-1.57337	0.01299	0.74826	0.998	23.2946	46	0.99787	23.1903	45	0.9971
ebi-a-GCST90027472.csv	8	0.477	1.19893	0.75017-1.9162	0.438	1.0637	0.90997-1.24341	0.792	1.01613	0.90197-1.14474	0.584	1.07053	0.84819-1.35116	0.567	1.06713	0.86341-1.31891	-0.0336	0.50148	0.734	4.56047	7	0.71342	4.04926	6	0.67001
ebi-a-GCST90027715.csv	8	0.302	0.59967	0.24693-1.4563	0.793	1.01619	0.90122-1.14583	0.799	1.01221	0.92197-1.11129	0.803	1.02316	0.86032-1.21682	0.804	1.02428	0.85315-1.22974	0.10407	0.28902	0.711	4.66976	7	0.70019	3.31739	6	0.76809
ebi-a-GCST90027525.csv	37	0.982	0.9957	0.69290-1.4308	0.917	1.00757	0.87499-1.16023	0.8	1.0135	0.91352-1.12442	0.544	1.10187	0.80801-1.50262	0.518	1.09852	0.82846-1.45660	0.002	0.92095	0.988	19.3161	36	0.98959	19.306	35	0.98542
ebi-a-GCST90027642.csv	125	0.078	1.36357	0.96838-1.9200	0.003	1.1277	1.04094-1.22170	0.8	0.99276	0.93858-1.05007	0.098	1.27107	0.95872-1.68519	0.04	1.27504	1.01395-1.60336	-0.02601	0.06787	0.306	131.52	124	0.3049	127.99	123	0.36081
ebi-a-GCST90027708.csv	33	0.265	0.75687	0.46769-1.2249	0.58	1.04416	0.89590-1.21697	0.8	1.0141	0.91005-1.13006	0.867	1.02871	0.74000-1.43006	0.907	1.0201	0.73227-1.42107	0.03028	0.23072	0.824	23.9275	32	0.84703	22.4329	31	0.86895
ebi-a-GCST90027576.csv	29	0.228	1.34317	0.84025-2.1471	0.589	0.96464	0.84646-1.09932	0.805	0.9881	0.89849-1.08664	0.702	0.9546	0.75420-1.20826	0.706	0.95777	0.76686-1.19620	-0.03325	0.20125	0.664	24.8868	28	0.63399	23.1708	27	0.6758
ebi-a-GCST90027730.csv	15	0.553	1.31467	0.54506-3.1709	0.915	1.01075	0.83039-1.23030	0.807	1.01912	0.87524-1.18666	0.768	1.05379	0.74938-1.48186	0.807	1.04311	0.74830-1.45408	-0.0228	0.57476	0.942	6.78256	14	0.94277	6.45132	13	0.92818
ebi-a-GCST90027704.csv	44	0	0.65223	0.52352-0.8126	0.037	1.09903	1.00556-1.20119	0.808	0.9919	0.92904-1.05901	0.26	1.11227	0.92637-1.33547	0.281	1.11227	0.91878-1.34651	0.05613	0.00035	0.256	49.1785	43	0.2395	34.0322	42	0.80437
ebi-a-GCST90027494.csv	50	0.694	0.95301	0.75113-1.2091	0.863	0.99375	0.92533-1.06722	0.814	1.00666	0.95255-1.06383	0.728	0.97457	0.84357-1.12592	0.684	0.97037	0.84004-1.12092	0.01002	0.64505	1	10.4858	49	1	10.2709	48	1
ebi-a-GCST90027540.csv	63	0.124	1.39944	0.91769-2.1341	0.94	0.9961	0.89958-1.10298	0.816	1.00886	0.93644-1.08688	0.27	0.87959	0.70157-1.10278	0.253	0.87959	0.70732-1.09381	-0.03001	0.12769	0.989	39.2661	62	0.98932	36.8813	61	0.99382
ebi-a-GCST90027603.csv	13	0.089	1.67836	0.97423-2.8914	0.959	0.99466	0.81058-1.22056	0.821	0.98215	0.83986-1.14854	0.819	1.04548	0.72090-1.51621	0.801	1.04548	0.74503-1.46710	-0.065	0.06888	0.772	8.32527	12	0.75922	4.26063	11	0.96166
ebi-a-GCST90027763.csv	23	0.44	0.81917	0.49845-1.3463	0.658	1.03969	0.87529-1.23498	0.829	1.01336	0.89861-1.14276	0.211	0.78774	0.54796-1.13244	0.188	0.7934	0.56807-1.10812	0.02585	0.39665	0.337	24.3196	22	0.3307	23.4824	21	0.31881
ebi-a-GCST90027798.csv	39	0	1.91004	1.44598-2.5230	0.558	0.98009	0.91632-1.04830	0.83	1.00582	0.95395-1.06051	0.527	0.9533	0.82319-1.10396	0.415	0.94637	0.83020-1.07880	-0.12101	5e-05	0.06	54.0329	38	0.04418	33.105	37	0.65226
ebi-a-GCST90027502.csv	44	0.955	0.98867	0.66565-1.4684	0.794	1.01878	0.88596-1.17151	0.832	0.98937	0.89645-1.09192	0.791	1.0385	0.78655-1.37114	0.736	1.04303	0.81776-1.33037	7e-05	0.99712	0.321	46.9648	43	0.31331	46.9648	42	0.2763
ebi-a-GCST90027636.csv	20	0.561	1.21937	0.63262-2.3503	0.474	0.95405	0.83889-1.08503	0.842	1.01172	0.90190-1.13492	0.68	0.95903	0.78876-1.16607	0.646	0.95618	0.79219-1.15413	-0.03128	0.57795	0.098	28.0512	19	0.08245	27.5596	18	0.06908
ebi-a-GCST90027739.csv	98	0.171	1.25053	0.91026-1.7180	0.803	0.99185	0.93013-1.05766	0.844	1.00464	0.95931-1.05211	0.424	1.07892	0.89647-1.29850	0.423	1.07322	0.90360-1.27467	-0.03334	0.17527	0.27	104.617	97	0.28069	102.624	96	0.30316
ebi-a-GCST90027762.csv	20	0.713	0.87893	0.44703-1.7281	0.68	0.96476	0.81345-1.14422	0.852	1.0126	0.88772-1.15506	0.785	0.95698	0.70109-1.30627	0.769	0.95698	0.71665-1.27791	0.01265	0.68058	0.979	8.72368	19	0.97779	8.54859	18	0.9693
ebi-a-GCST90027786.csv	29	0.169	1.1925	0.93428-1.5221	0.174	0.9545	0.89254-1.02077	0.852	0.99518	0.94590-1.04703	0.33	0.93592	0.82117-1.06671	0.285	0.937	0.83346-1.05341	-0.03983	0.14904	0.979	14.9106	28	0.97936	12.7043	27	0.99101
ebi-a-GCST90027645.csv	63	0.001	2.03478	1.38573-2.9878	0.063	1.11956	0.99389-1.26112	0.859	1.00857	0.91781-1.10830	0.311	1.16362	0.87006-1.55622	0.106	1.1897	0.96681-1.46399	-0.07071	0.00051	0.014	89.2315	62	0.01334	73.0628	61	0.13854
ebi-a-GCST90027825.csv	18	0.214	1.21266	0.90554-1.6240	0.843	1.01194	0.90007-1.13773	0.863	1.00737	0.92672-1.09505	0.702	1.04073	0.85088-1.27295	0.626	1.04935	0.86773-1.26898	-0.0305	0.21237	0.721	13.7216	17	0.6867	12.0343	16	0.74161
ebi-a-GCST90027691.csv	13	0.769	0.93671	0.61214-1.4334	0.859	1.01099	0.89628-1.14038	0.864	0.99195	0.90426-1.08813	0.602	0.95048	0.78927-1.14461	0.922	1.00929	0.84199-1.20983	0.00999	0.79181	0.991	3.63793	12	0.98912	3.56478	11	0.98097
ebi-a-GCST90027506.csv	89	0.533	1.13331	0.76611-1.6765	0.768	0.98763	0.90916-1.07287	0.865	0.99467	0.93529-1.05781	0.949	0.99334	0.80904-1.21963	0.946	0.99334	0.81871-1.20522	-0.01324	0.51011	1	37.158	88	1	36.7206	87	1
ebi-a-GCST90027749.csv	80	0.32	1.28221	0.78807-2.0862	0.157	1.06951	0.97442-1.17388	0.88	1.00535	0.93827-1.07722	0.364	1.11375	0.88376-1.40360	0.403	1.10956	0.87058-1.41413	-0.02364	0.32548	1	43.0464	79	0.99968	42.0673	78	0.99971
ebi-a-GCST90027751.csv	37	0.8	1.05202	0.71335-1.5515	0.613	1.03158	0.91438-1.16380	0.882	1.00674	0.92112-1.10031	0.583	1.06712	0.84776-1.34323	0.477	1.08186	0.87294-1.34080	-0.00471	0.82095	1	10.9572	36	0.99998	10.9052	35	0.99997
ebi-a-GCST90027718.csv	26	0.839	0.9414	0.52940-1.6741	0.803	1.01765	0.88710-1.16742	0.897	1.00722	0.90294-1.12353	0.924	1.01231	0.79016-1.29692	0.911	1.0138	0.79934-1.28579	0.00679	0.8167	1	4.3361	25	1	4.28118	24	1
ebi-a-GCST90027812.csv	23	0.264	0.56198	0.20988-1.5048	0.965	0.99696	0.86869-1.14418	0.918	1.00577	0.90135-1.12228	0.984	1.00261	0.77383-1.29904	0.983	1.00261	0.79088-1.27104	0.06238	0.25688	1	5.42884	22	0.99987	4.07043	21	0.99998
ebi-a-GCST90027695.csv	26	0.978	0.99313	0.60929-1.6188	0.644	1.03803	0.88601-1.21613	0.92	1.00601	0.89487-1.13095	0.17	0.76075	0.52037-1.11216	0.158	0.77203	0.54477-1.09409	0.00159	0.95792	0.262	29.4938	25	0.2438	29.4903	24	0.20222
ebi-a-GCST90027676.csv	21	0.689	1.16663	0.55510-2.4519	0.963	0.99571	0.83163-1.19215	0.923	0.99325	0.86543-1.13996	0.983	0.99609	0.69711-1.42329	0.999	0.9997	0.70719-1.41320	-0.01495	0.67056	0.956	10.56	20	0.95685	10.3733	19	0.94313
ebi-a-GCST90027856.csv	25	0.206	1.37993	0.84982-2.2407	0.912	0.98982	0.82558-1.18673	0.927	1.00647	0.87713-1.15488	0.472	1.14794	0.79302-1.66171	0.262	0.83095	0.60575-1.13989	-0.0319	0.19635	0.993	9.89535	24	0.99496	8.12472	23	0.99816
ebi-a-GCST90027658.csv	11	0.359	1.85383	0.53022-6.4816	0.812	1.02933	0.81076-1.30683	0.939	0.99294	0.82851-1.19001	0.825	1.04209	0.72961-1.48841	0.898	1.02575	0.70101-1.50093	-0.05581	0.34896	0.944	3.81241	10	0.95541	2.83625	9	0.97043
ebi-a-GCST90027683.csv	11	0.359	1.85239	0.53005-6.4737	0.806	1.02933	0.81759-1.29589	0.939	0.99293	0.82849-1.19001	0.842	1.04214	0.70264-1.54567	0.892	1.02579	0.71573-1.47019	-0.05574	0.34936	0.949	3.8124	10	0.95541	2.83794	9	0.97037
ebi-a-GCST90027744.csv	11	0.359	1.85342	0.53014-6.4798	0.81	1.02932	0.81341-1.30253	0.939	0.99294	0.82851-1.19000	0.824	1.04211	0.73202-1.48354	0.892	1.02576	0.71774-1.46597	-0.0558	0.3491	0.956	3.8124	10	0.95541	2.83682	9	0.97041
ebi-a-GCST90027804.csv	4	0.886	1.13722	0.24070-5.3729	0.523	0.93415	0.75776-1.15159	0.943	1.0062	0.84873-1.19287	0.592	0.91717	0.69075-1.21782	0.581	0.92299	0.71526-1.19104	-0.03177	0.89042	0.438	3.0761	3	0.38004	3.03917	2	0.2188
ebi-a-GCST90027614.csv	21	0.428	1.2913	0.69578-2.3965	0.56	1.06139	0.86860-1.29696	0.948	1.00482	0.86963-1.16101	0.494	1.15323	0.77243-1.72175	0.57	1.13068	0.74497-1.71609	-0.02285	0.42343	0.411	21.0489	20	0.39426	20.3327	19	0.37482
ebi-a-GCST90027822.csv	48	0.607	0.93154	0.71241-1.2181	0.429	1.02094	0.96988-1.07469	0.948	0.99866	0.95930-1.03962	0.658	1.02325	0.92482-1.13215	0.702	1.02325	0.91026-1.15026	0.0126	0.60956	1	9.46813	47	1	9.20371	46	1
ebi-a-GCST90027717.csv	39	0	1.87052	1.41586-2.4712	0.54	0.98022	0.91952-1.04493	0.952	0.99842	0.94890-1.05053	0.54	0.96018	0.84402-1.09232	0.449	0.95159	0.83807-1.08049	-0.11816	7e-05	0.088	49.8592	38	0.09428	29.826	37	0.79275
ebi-a-GCST90027510.csv	19	0.317	1.32319	0.77666-2.2543	0.691	1.03879	0.86129-1.25286	0.953	1.00425	0.87314-1.15505	0.249	0.83015	0.61097-1.12797	0.308	0.83686	0.59997-1.16730	-0.02743	0.30774	0.998	5.92575	18	0.99649	4.82009	17	0.99823
ebi-a-GCST90027560.csv	32	0.545	0.93464	0.75284-1.1603	0.864	1.00578	0.94145-1.07450	0.956	1.00139	0.95309-1.05213	0.473	1.04699	0.92504-1.18502	0.59	0.96768	0.85987-1.08900	0.01437	0.52574	0.987	16.0641	31	0.98759	15.6519	30	0.9855
ebi-a-GCST90027626.csv	104	0.539	0.93518	0.75563-1.1574	0.07	1.04226	0.99658-1.09002	0.958	0.99918	0.96935-1.02992	0.578	1.03294	0.92169-1.15763	0.576	1.02939	0.93043-1.13888	0.01316	0.54002	0.854	88.5362	103	0.84427	88.1581	102	0.83386
ebi-a-GCST90027598.csv	13	0.219	1.51362	0.81152-2.8231	0.561	1.06278	0.86542-1.30514	0.972	1.00282	0.85759-1.17264	0.581	1.09549	0.79970-1.50068	0.505	1.10566	0.83018-1.47256	-0.04779	0.20813	0.994	3.13581	12	0.99451	1.34748	11	0.99978
ebi-a-GCST90027781.csv	36	0.446	0.83672	0.53198-1.3160	0.912	0.99398	0.89347-1.10580	0.98	1.00113	0.91420-1.09633	0.502	0.91947	0.72131-1.17208	0.558	0.93183	0.73726-1.17775	0.03097	0.43345	<0.001	65.1093	35	0.00149	63.9278	34	0.00142
ebi-a-GCST90027549.csv	73	0.067	0.78095	0.60173-1.0135	0.001	1.17213	1.06335-1.29205	0.982	0.99919	0.93171-1.07157	0.194	0.85781	0.68199-1.07896	0.126	1.18743	0.95551-1.47564	0.02706	0.05845	0.999	36.5316	72	0.99984	32.8324	71	0.99997
ebi-a-GCST90027561.csv	21	0.904	1.02874	0.65396-1.6183	0.676	1.02905	0.89955-1.17719	0.982	1.00113	0.90801-1.10380	0.736	1.04126	0.82554-1.31334	0.755	1.03411	0.84021-1.27277	-0.00332	0.90534	0.792	15.0835	20	0.77161	15.069	19	0.7182
ebi-a-GCST90027641.csv	14	0.473	1.41715	0.56368-3.5628	0.757	1.04186	0.80353-1.35087	0.983	0.99747	0.78680-1.26456	0.18	0.67946	0.39824-1.15927	0.418	1.22907	0.75775-1.99356	-0.03737	0.45419	0.012	26.0369	13	0.01681	24.8003	12	0.0158
ebi-a-GCST90027703.csv	61	0.434	0.82151	0.50354-1.3403	0.485	1.02591	0.95484-1.10228	0.986	0.99954	0.94833-1.05351	0.64	1.03598	0.89387-1.20069	0.643	1.03423	0.89759-1.19168	0.02472	0.43271	1	17.5174	60	1	16.8934	59	1
ebi-a-GCST90027652.csv	83	0.299	1.29537	0.79728-2.1046	0.166	1.06646	0.97369-1.16808	0.988	0.9995	0.93389-1.06972	0.356	1.11498	0.88611-1.40297	0.358	1.11075	0.88882-1.38810	-0.02515	0.29341	1	43.8851	82	0.99982	42.7668	81	0.99985
ebi-a-GCST90027738.csv	83	0.298	1.29621	0.79769-2.1063	0.172	1.06647	0.97231-1.16976	0.989	0.99951	0.93391-1.06971	0.369	1.11491	0.88055-1.41164	0.335	1.11068	0.89827-1.37332	-0.02522	0.29237	1	43.8851	82	0.99982	42.7619	81	0.99985
ebi-a-GCST90027503.csv	52	0.017	0.63033	0.43707-0.9090	0.3	1.06836	0.94277-1.21067	0.991	0.99949	0.91912-1.08689	0.133	1.27698	0.93284-1.74809	0.156	1.26248	0.91938-1.73362	0.04629	0.01442	0.749	43.9815	51	0.74627	37.5547	50	0.90282
ebi-a-GCST90027491.csv	39	0.258	1.27092	0.84393-1.9139	0.851	1.01255	0.88932-1.15287	0.995	1.00033	0.90692-1.10336	0.662	0.94303	0.72657-1.22398	0.627	0.94054	0.73600-1.20192	-0.02355	0.24536	0.998	16.7707	38	0.99889	15.3773	37	0.99935

## Sheet: S7.2
The resluts of forward univariable MR analysis between gut microbiota phenotypes and the risk of AAA in UK Bio-Bank database.
id	nsnp	MR-Egger			Weighted median			Inverse variance weighted			Simple mode			Weighted mode			MR-Egger intercept		MR-PRESSO global	MR-IVW			MR-Egeer
		p_value	OR	95% OR	p_value	OR	95% OR	p_value	OR	95% OR	p_value	OR	95% OR	p_value	OR	95% OR	egger intercept	p_value	p_value	Q	Q_df	Q_pval	Q	Q_df	Q_pval
ebi-a-GCST90027446.csv	17	0.872	1.18201	0.16038-8.7114	0	0.2416	0.14283-0.40867	0	0.34578	0.23477-0.50930	0.007	0.23443	0.09419-0.58348	0.006	0.23443	0.09537-0.57625	-0.10692	0.23784	0.771	12.8838	16	0.68123	11.3722	15	0.72579
ebi-a-GCST90027449.csv	73	0.508	0.81651	0.44929-1.4839	0	1.4215	1.21108-1.66849	0	1.58776	1.41285-1.78432	0.062	1.40362	0.98821-1.99364	0.062	1.40362	0.98911-1.99184	0.11932	0.02927	1	37.5756	72	0.99973	32.6254	71	0.99997
ebi-a-GCST90027460.csv	62	0	0.08975	0.02778-0.2900	0.001	0.6421	0.49270-0.83679	0	0.70471	0.57896-0.85778	0.016	0.46645	0.25521-0.85255	0.016	0.46286	0.25155-0.85168	0.22074	0.0009	0.993	37.5814	61	0.99208	25.3782	60	0.99998
ebi-a-GCST90027463.csv	60	0.23	0.50852	0.17040-1.5175	0	0.55537	0.49241-0.62639	0	0.5572	0.50713-0.61221	0	0.54755	0.42421-0.70675	0	0.54755	0.42267-0.70933	0.02051	0.86991	1	1.1333	59	1	1.10624	58	1
ebi-a-GCST90027464.csv	45	0.001	9.07548	2.63076-31.3082	0	0.29626	0.22569-0.38890	0	0.39502	0.32327-0.48269	0	0.29559	0.17178-0.50863	0	0.29559	0.16988-0.51430	-0.30767	1e-05	0.574	45.1795	44	0.42246	19.9218	43	0.99899
ebi-a-GCST90027465.csv	45	0.013	0.19041	0.05434-0.6672	0	0.38085	0.29024-0.49975	0	0.48029	0.39683-0.58130	0	0.3227	0.18431-0.56500	0	0.32508	0.18514-0.57080	0.12975	0.15067	0.801	38.461	44	0.70723	36.3199	43	0.75443
ebi-a-GCST90027467.csv	35	0.751	0.86817	0.36547-2.0623	0	0.55858	0.43928-0.71028	0	0.56618	0.47460-0.67542	0.004	0.46228	0.28171-0.75858	0.006	0.47105	0.28597-0.77593	-0.05719	0.32977	1	14.4711	34	0.99864	13.4927	33	0.99895
ebi-a-GCST90027471.csv	57	0.014	4.52087	1.40956-14.4997	0	0.49753	0.37464-0.66072	0	0.53307	0.43409-0.65461	0.004	0.37109	0.19277-0.71435	0.004	0.3628	0.18778-0.70092	-0.17906	0.00058	0.989	35.3449	56	0.98598	22.004	55	0.99998
ebi-a-GCST90027475.csv	62	0.23	1.71028	0.71819-4.0728	0	0.55667	0.44696-0.69331	0	0.63918	0.54229-0.75338	0.009	0.4974	0.29945-0.82621	0.007	0.49941	0.30536-0.81677	-0.10653	0.02718	1	17.3177	61	1	12.1907	60	1
ebi-a-GCST90027478.csv	361	0	11.2392	5.61332-22.5037	0	0.36519	0.33576-0.39719	0	0.42242	0.39761-0.44878	0	0.34656	0.26482-0.45353	0	0.34656	0.26471-0.45371	-0.36608	0	1	248.637	360	1	162.175	359	1
ebi-a-GCST90027481.csv	89	0	0.18359	0.07743-0.4353	0.003	0.70253	0.55643-0.88698	0	0.74664	0.63678-0.87545	0.21	0.70119	0.40395-1.21717	0.005	0.46922	0.28047-0.78498	0.13487	0.00169	0.602	84.1386	88	0.59676	73.6376	87	0.84586
ebi-a-GCST90027485.csv	19	0.699	1.89415	0.07860-45.6476	0	2.61629	1.58054-4.33078	0	2.4231	1.67297-3.50958	0.018	2.96276	1.31101-6.69553	0.026	2.82963	1.22119-6.55656	0.02029	0.88041	0.844	13.1415	18	0.7831	13.1182	17	0.72824
ebi-a-GCST90027486.csv	57	0.011	0.3394	0.15231-0.7563	0	0.67655	0.59094-0.77457	0	0.69634	0.62830-0.77174	0.01	0.67318	0.50301-0.90093	0.011	0.67506	0.50380-0.90454	0.14541	0.08183	1	13.2538	56	1	10.1117	55	1
ebi-a-GCST90027487.csv	74	0.47	0.69966	0.26699-1.8335	0	0.53031	0.46732-0.60179	0	0.55484	0.50491-0.60972	0	0.52348	0.39449-0.69465	0	0.52511	0.40369-0.68304	-0.0484	0.63686	1	19.8549	73	1	19.6302	72	1
ebi-a-GCST90027488.csv	68	0.604	0.80987	0.36662-1.7890	0	0.38072	0.30408-0.47666	0	0.46334	0.38777-0.55363	0	0.37003	0.24149-0.56699	0	0.39751	0.27255-0.57975	-0.07168	0.16128	0.066	90.4159	67	0.02991	87.7476	66	0.03801
ebi-a-GCST90027494.csv	52	0.156	0.64425	0.35408-1.1722	0	0.50099	0.41777-0.60080	0	0.55746	0.48678-0.63840	0	0.47099	0.31942-0.69450	0	0.47496	0.32739-0.68903	-0.02606	0.62876	1	18.7976	51	0.99999	18.5609	50	0.99999
ebi-a-GCST90027495.csv	70	0.126	2.44941	0.78930-7.6012	0.005	0.71224	0.56118-0.90397	0	0.71136	0.59685-0.84785	0.007	0.36756	0.18178-0.74318	0.008	0.3767	0.18731-0.75754	-0.1149	0.03381	0.96	50.9627	69	0.94909	46.2707	68	0.97985
ebi-a-GCST90027504.csv	58	0.024	0.24533	0.07498-0.8027	0	0.57136	0.43475-0.75088	0	0.55103	0.44988-0.67493	0.003	0.33138	0.16648-0.65962	0.002	0.33138	0.17310-0.63437	0.08604	0.17988	1	22.879	57	0.99998	21.0345	56	0.99999
ebi-a-GCST90027520.csv	73	0.096	0.59393	0.32412-1.0883	0	0.78406	0.69548-0.88392	0	0.77945	0.70756-0.85864	0.103	0.78772	0.59331-1.04583	0.129	0.78993	0.58469-1.06722	0.05934	0.37586	1	16.7287	72	1	15.9345	71	1
ebi-a-GCST90027521.csv	87	0.34	1.38626	0.71100-2.7028	0	0.71367	0.62404-0.81616	0	0.80421	0.72529-0.89172	0.037	0.70159	0.50510-0.97451	0.038	0.70159	0.50430-0.97607	-0.0816	0.1094	1	35.43	86	1	32.8126	85	1
ebi-a-GCST90027526.csv	26	0.013	10.0608	1.85357-54.6077	0	0.34035	0.19939-0.58098	0	0.35905	0.22358-0.57658	0.004	0.13186	0.03832-0.45379	0.005	0.14005	0.04025-0.48728	-0.32243	0.00058	<0.001	57.4554	25	0.00023	34.7429	24	0.0723
ebi-a-GCST90027536.csv	76	0.122	0.5467	0.25681-1.1638	0.185	0.8703	0.70865-1.06881	0	0.70548	0.60987-0.81609	0.659	1.14723	0.62499-2.10583	0.658	1.14723	0.62596-2.10256	0.02743	0.50236	0.91	59.6356	75	0.90263	59.1812	74	0.8952
ebi-a-GCST90027547.csv	37	0.129	0.40449	0.12905-1.2678	0	0.5723	0.42986-0.76195	0	0.65367	0.53110-0.80451	0.051	0.54404	0.30134-0.98222	0.056	0.55356	0.30804-0.99477	0.05179	0.40805	0.676	32.205	36	0.64974	31.5038	35	0.63766
ebi-a-GCST90027549.csv	68	0	15.3295	10.19903-23.0409	0	2.53048	2.00510-3.19352	0	3.77058	3.19713-4.44690	0	6.56046	3.52335-12.21554	0	6.56046	3.29218-13.07329	-0.19169	0	0.434	82.4485	67	0.09672	29.9436	66	0.99996
ebi-a-GCST90027550.csv	137	0.001	2.08153	1.34092-3.2312	0	1.72102	1.48578-1.99351	0	1.87712	1.68456-2.09170	0.013	1.62728	1.11451-2.37597	0.01	1.62728	1.12762-2.34834	-0.01503	0.63533	1	69.1742	136	1	68.9482	135	1
ebi-a-GCST90027551.csv	36	0.95	0.98332	0.58222-1.6607	0	1.59065	1.36016-1.86020	0	1.60617	1.41194-1.82713	0.006	1.60419	1.16739-2.20443	0.003	1.59624	1.19959-2.12404	0.11819	0.06743	0.162	47.8149	35	0.07293	43.2729	34	0.13237
ebi-a-GCST90027553.csv	81	0.249	0.62819	0.28670-1.3764	0.002	0.70896	0.56756-0.88558	0	0.7415	0.62696-0.87696	0.152	0.69499	0.42450-1.13784	0.143	0.69499	0.42929-1.12514	0.01808	0.67259	1	41.6533	80	0.99988	41.4734	79	0.99984
ebi-a-GCST90027571.csv	60	0.045	0.30379	0.09746-0.9470	0	2.64482	2.04816-3.41530	0	1.8238	1.49644-2.22277	0.002	2.79864	1.51599-5.16652	0.002	2.79864	1.48010-5.29180	0.15211	0.00268	0.984	38.9434	59	0.97967	29.0984	58	0.99946
ebi-a-GCST90027577.csv	43	0.57	0.86494	0.52672-1.4204	0.002	0.7497	0.62684-0.89664	0	0.73535	0.64488-0.83852	0.259	0.79841	0.54275-1.17451	0.135	0.75511	0.52623-1.08352	-0.0306	0.50969	0.943	29.7801	42	0.92154	29.3377	41	0.91305
ebi-a-GCST90027579.csv	121	0.242	0.55888	0.21191-1.4740	0	0.39649	0.32191-0.48834	0	0.67547	0.58414-0.78109	0.002	0.3662	0.19560-0.68562	0.003	0.3662	0.19162-0.69986	0.01829	0.69919	0.333	126.542	120	0.32359	126.382	119	0.30433
ebi-a-GCST90027586.csv	31	0.023	0.24394	0.07740-0.7688	0.032	0.62205	0.40257-0.96118	0	0.56433	0.41912-0.75984	0.32	0.62687	0.25354-1.54992	0.269	0.61381	0.26252-1.43516	0.10405	0.14945	0.446	31.4865	30	0.39178	29.2732	29	0.45091
ebi-a-GCST90027587.csv	90	0.043	2.74985	1.04522-7.2345	0.106	1.22295	0.95840-1.56051	0	1.38453	1.15864-1.65448	0.614	0.82147	0.38366-1.75888	0.003	2.87213	1.45656-5.66343	-0.0736	0.16081	0.046	112.311	89	0.04811	109.815	88	0.05768
ebi-a-GCST90027588.csv	159	0	3.52246	2.30433-5.3845	0	1.94374	1.70032-2.22201	0	1.31212	1.16489-1.47797	0	2.04486	1.50379-2.78061	0	2.03163	1.49975-2.75216	-0.15122	1e-05	<0.001	258.206	158	0	226.028	157	0.00026
ebi-a-GCST90027590.csv	85	0	3.35868	2.16314-5.2150	0.069	1.11302	0.99164-1.24926	0	1.17876	1.08538-1.28017	0.711	0.94971	0.72336-1.24688	0.715	0.94971	0.72035-1.25209	-0.18785	1e-05	1	34.227	84	1	11.6765	83	1
ebi-a-GCST90027593.csv	56	0.1	0.5413	0.26366-1.1113	0	0.6682	0.58058-0.76903	0	0.7086	0.63854-0.78633	0.011	0.66408	0.48881-0.90218	0.01	0.66408	0.49221-0.89596	0.05614	0.46151	1	13.1016	55	1	12.5516	54	1
ebi-a-GCST90027596.csv	51	0.76	1.15017	0.47090-2.8093	0.06	1.19944	0.99215-1.45003	0	1.33722	1.16391-1.53633	0.394	1.18287	0.80659-1.73469	0.39	1.18287	0.80898-1.72955	0.02606	0.73922	1	20.0291	50	0.99995	19.917	49	0.99993
ebi-a-GCST90027599.csv	135	0.222	1.14612	0.92157-1.4254	0.001	0.8674	0.79620-0.94496	0	0.75504	0.70700-0.80633	0.265	0.868	0.67752-1.11203	0.28	0.8705	0.67749-1.11850	-0.09202	0.00013	1	47.767	134	1	32.2861	133	1
ebi-a-GCST90027604.csv	72	0.239	0.58211	0.23821-1.4225	0	0.60805	0.47773-0.77393	0	0.71321	0.59415-0.85611	0.064	0.57751	0.32566-1.02412	0.065	0.57751	0.32504-1.02607	0.02017	0.65039	1	31.575	71	0.99999	31.3678	70	0.99998
ebi-a-GCST90027607.csv	19	0.053	0.1632	0.02963-0.8988	0.002	2.33537	1.36406-3.99835	0	2.073	1.42184-3.02236	0.02	3.75626	1.36243-10.35616	0.022	3.53109	1.32148-9.43534	0.26113	0.00825	0.399	19.3552	18	0.37027	10.4221	17	0.88498
ebi-a-GCST90027614.csv	21	0.124	3.16762	0.77672-12.9181	0.006	0.49555	0.30110-0.81556	0	0.49521	0.33669-0.72835	0.02	0.28154	0.10504-0.75463	0.05	0.30393	0.09922-0.93099	-0.17036	0.01517	0.241	25.0816	20	0.19833	17.9579	19	0.52525
ebi-a-GCST90027615.csv	79	0.456	0.7642	0.37813-1.5444	0.002	1.47883	1.15948-1.88613	0	1.3688	1.14717-1.63324	0.17	1.58004	0.82666-3.02001	0.214	1.53443	0.78561-2.99699	0.05414	0.09752	0.631	73.6892	78	0.61717	70.8756	77	0.67477
ebi-a-GCST90027618.csv	57	0.931	1.06444	0.26225-4.3204	0.15	0.7982	0.58734-1.08476	0	0.66017	0.53183-0.81948	0.937	1.02835	0.51313-2.06088	0.842	1.07111	0.54725-2.09642	-0.04495	0.50159	0.852	45.8034	56	0.83274	45.3458	55	0.82018
ebi-a-GCST90027623.csv	67	0	0.03126	0.00950-0.1029	0.107	1.24942	0.95279-1.63840	0	1.48102	1.19911-1.82920	0.474	0.77413	0.38581-1.55331	0.48	0.80528	0.44313-1.46340	0.35976	0	0.023	91.5195	66	0.02056	50.3006	65	0.9102
ebi-a-GCST90027629.csv	75	0	0.14421	0.07250-0.2868	0	0.35936	0.29011-0.44514	0	0.40588	0.34575-0.47646	0	0.36079	0.22401-0.58110	0	0.36437	0.22661-0.58588	0.12705	0.00335	1	34.7246	74	0.99997	25.5237	73	1
ebi-a-GCST90027635.csv	52	0.226	0.50772	0.17178-1.5007	0	0.48884	0.39373-0.60693	0	0.66604	0.56902-0.77961	0.008	0.45588	0.26105-0.79611	0.003	0.45588	0.28010-0.74197	0.03712	0.62196	0.757	43.9474	51	0.74746	43.7012	50	0.72274
ebi-a-GCST90027638.csv	46	0.444	1.51296	0.52913-4.3261	0	2.62503	1.85488-3.71494	0	1.62431	1.29043-2.04459	0.02	2.83637	1.21822-6.60392	0.032	2.83637	1.12787-7.13292	0.00927	0.89261	0.648	41.0101	45	0.64163	40.9917	44	0.60131
ebi-a-GCST90027639.csv	214	0	69.1231	25.92347-184.3116	0	0.16307	0.13984-0.19015	0	0.21521	0.19342-0.23945	0	0.16483	0.10309-0.26355	0	0.16483	0.10515-0.25838	-0.46993	0	0.996	186.359	213	0.90595	51.6987	212	1
ebi-a-GCST90027646.csv	103	0.905	0.94148	0.34930-2.5376	0	0.477	0.38843-0.58577	0	0.53535	0.46035-0.62257	0.001	0.40843	0.24213-0.68894	0.002	0.41164	0.23787-0.71233	-0.051	0.26152	1	50.9029	102	0.99999	49.6279	101	1
ebi-a-GCST90027647.csv	109	0	15.41	8.91174-26.6465	0.825	1.02767	0.80668-1.30921	0	1.42851	1.18721-1.71884	0.419	0.75281	0.37925-1.49434	0.476	0.79209	0.41840-1.49956	-0.26722	0	0.001	158.658	108	0.00109	80.097	107	0.97581
ebi-a-GCST90027648.csv	41	0	6.67771	3.77265-11.8198	0	1.81357	1.51418-2.17216	0	1.70006	1.48910-1.94091	0.002	1.7741	1.25351-2.51088	0.002	1.7741	1.25460-2.50870	-0.32047	2e-05	0.909	30.6354	40	0.85676	7.32653	39	1
ebi-a-GCST90027651.csv	367	0.826	1.04563	0.70258-1.5562	0	0.69595	0.63371-0.76429	0	0.70819	0.65973-0.76021	0.001	0.58815	0.42822-0.80782	0.001	0.59233	0.43862-0.79991	-0.0457	0.05169	1	77.5425	366	1	73.7319	365	1
ebi-a-GCST90027660.csv	89	0.003	12.4564	2.50620-61.9109	0	0.34898	0.28396-0.42888	0	0.52264	0.45080-0.60592	0	0.33501	0.18964-0.59178	0.001	0.33501	0.18121-0.61933	-0.29881	0.00019	0.876	74.751	88	0.84202	59.5972	87	0.98914
ebi-a-GCST90027662.csv	411	0	0.51993	0.36667-0.7372	0	0.74303	0.68567-0.80519	0	0.75294	0.70790-0.80084	0	0.59072	0.44877-0.77757	0.858	0.97626	0.75082-1.26939	0.04887	0.03535	1	100.786	410	1	96.3278	409	1
ebi-a-GCST90027663.csv	69	0.081	2.7591	0.89701-8.4867	0	0.40329	0.30680-0.53012	0	0.51535	0.42701-0.62197	0.002	0.34287	0.17906-0.65653	0.002	0.35103	0.18353-0.67141	-0.15527	0.00415	0.519	68.8011	68	0.45003	59.9912	67	0.7156
ebi-a-GCST90027664.csv	77	0.021	0.30293	0.11199-0.8194	0.005	1.45932	1.12114-1.89951	0	1.69833	1.41459-2.03898	0.002	3.44421	1.64253-7.22214	0.001	3.41726	1.67202-6.98419	0.16016	0.00091	0.931	59.9419	76	0.91187	48.0086	75	0.99355
ebi-a-GCST90027667.csv	53	0.048	0.48663	0.24249-0.9766	0	2.57651	1.89764-3.49824	0	2.9512	2.40037-3.62843	0	5.55672	2.39650-12.88428	0	5.55672	2.50839-12.30954	0.18688	0	0.924	41.8797	52	0.84102	13.6735	51	1
ebi-a-GCST90027668.csv	57	0.033	2.42225	1.09492-5.3586	0	2.07115	1.55393-2.76053	0	1.52702	1.23531-1.88761	0.024	2.16372	1.12472-4.16254	0.021	2.17574	1.14544-4.13277	-0.04874	0.24237	1	26.8394	56	0.99966	25.4428	55	0.99978
ebi-a-GCST90027669.csv	78	0.062	0.60617	0.36089-1.0182	0.048	1.13042	1.00081-1.27680	0	1.21543	1.11471-1.32526	0.001	1.75085	1.26100-2.43099	0.002	1.75085	1.25047-2.45147	0.12578	0.0094	0.391	80.6896	77	0.36458	73.5874	76	0.55707
ebi-a-GCST90027674.csv	81	0.001	6.61682	2.35214-18.6138	0	2.63171	2.09319-3.30877	0	2.23939	1.90084-2.63824	0	2.67413	1.61782-4.42014	0	2.67413	1.64257-4.35353	-0.10431	0.04083	1	41.2468	80	0.9999	36.9231	79	0.99999
ebi-a-GCST90027675.csv	93	0.058	3.15396	0.97748-10.1766	0	1.8121	1.48655-2.20894	0	1.47281	1.26023-1.72123	0.013	1.90826	1.15654-3.14858	0.02	1.90826	1.11558-3.26419	-0.07432	0.20187	1	26.2363	92	1	24.5837	91	1
ebi-a-GCST90027686.csv	89	0.003	12.4503	2.50445-61.8936	0	0.34899	0.28144-0.43275	0	0.52264	0.45081-0.60592	0.001	0.33496	0.18490-0.60682	0	0.33496	0.18518-0.60590	-0.29877	0.00019	0.894	74.7484	88	0.84207	59.6034	87	0.98912
ebi-a-GCST90027688.csv	403	0.018	0.62509	0.42365-0.9223	0	0.74163	0.68210-0.80635	0	0.74421	0.69913-0.79219	0	0.58593	0.43895-0.78213	0.877	0.97957	0.75401-1.27261	0.02304	0.37378	1	82.7872	402	1	81.9944	401	1
ebi-a-GCST90027690.csv	48	0.026	0.14563	0.02805-0.7561	0	0.41797	0.31076-0.56218	0	0.4844	0.39191-0.59871	0.001	0.31561	0.16380-0.60813	0.002	0.34032	0.17996-0.64356	0.11039	0.15605	0.574	46.3039	47	0.50129	44.2243	46	0.54687
ebi-a-GCST90027693.csv	79	0.027	0.32707	0.12390-0.8634	0.004	1.46181	1.12910-1.89258	0	1.69061	1.41185-2.02441	0.002	3.4245	1.61615-7.25627	0.003	3.39787	1.56846-7.36106	0.15346	0.00116	0.951	60.1386	78	0.93346	48.7438	77	0.99507
ebi-a-GCST90027696.csv	109	0.042	0.58511	0.35161-0.9737	0.209	1.09642	0.94978-1.26569	0	1.3761	1.23458-1.53384	0.832	1.04381	0.70375-1.54820	0.802	1.05026	0.71596-1.54064	0.13436	0.00108	0.192	122.204	108	0.16553	110.53	107	0.38813
ebi-a-GCST90027699.csv	63	0.001	7.50128	2.48859-22.6109	0	0.61797	0.51120-0.74703	0	0.73629	0.63822-0.84944	0.022	0.61653	0.41209-0.92238	0.024	0.61653	0.40985-0.92742	-0.25641	0.0001	0.987	39.1949	62	0.98956	21.9024	61	1
ebi-a-GCST90027701.csv	58	0.032	2.42732	1.10057-5.3535	0	2.06766	1.56314-2.73501	0	1.5399	1.24834-1.89956	0.018	2.16902	1.16140-4.05086	0.016	2.181	1.17858-4.03601	-0.04803	0.24711	1	27.0943	57	0.99974	25.7263	56	0.99983
ebi-a-GCST90027702.csv	75	0.056	0.59352	0.35041-1.0053	0.056	1.13131	0.99672-1.28406	0	1.21602	1.11300-1.32858	0.002	1.74437	1.24864-2.43691	0.004	1.74437	1.20847-2.51790	0.12939	0.00852	0.365	78.0614	74	0.35104	70.7491	73	0.55286
ebi-a-GCST90027705.csv	57	0.002	0.06529	0.01245-0.3425	0	2.18075	1.84792-2.57353	0	1.81394	1.60754-2.04683	0	2.25552	1.54622-3.29020	0	2.25552	1.52012-3.34669	0.51417	0.00023	0.998	32.8314	56	0.99429	17.293	55	1
ebi-a-GCST90027709.csv	205	0.903	1.02165	0.72428-1.4411	0	1.1281	1.06154-1.19884	0	1.14717	1.09421-1.20270	0.2	1.13088	0.93741-1.36428	0.184	1.13088	0.94390-1.35490	0.02208	0.50579	1	23.2967	204	1	22.8524	203	1
ebi-a-GCST90027711.csv	69	0.266	3.32509	0.40787-27.1074	0	1.66715	1.31282-2.11711	0	1.41493	1.17608-1.70228	0.067	1.73677	0.97121-3.10580	0.065	1.73677	0.97557-3.09193	-0.07684	0.42584	1	32.3695	68	0.99993	31.7276	67	0.99992
ebi-a-GCST90027713.csv	65	0.001	5.34252	2.13401-13.3751	0	1.94028	1.48330-2.53803	0	1.53862	1.26798-1.86702	0.006	2.43355	1.31000-4.52071	0.004	2.47181	1.36656-4.47095	-0.1276	0.00843	0.961	47.235	64	0.94239	39.8378	63	0.99006
ebi-a-GCST90027714.csv	94	0.045	3.34576	1.04605-10.7013	0	1.81315	1.47876-2.22315	0	1.48532	1.27186-1.73461	0.015	1.91596	1.14289-3.21193	0.011	1.91596	1.17045-3.13632	-0.07934	0.17053	1	27.4197	93	1	25.5117	92	1
ebi-a-GCST90027721.csv	30	0.398	0.31728	0.02308-4.3625	0	1.87156	1.44498-2.42408	0	2.04591	1.67410-2.50031	0.033	1.78913	1.07370-2.98127	0.028	1.78913	1.09106-2.93383	0.25691	0.17313	1	2.08437	29	1	0.13034	28	1
ebi-a-GCST90027729.csv	21	0.073	0.0881	0.00720-1.0786	0	3.47445	2.28366-5.28618	0	2.41077	1.78109-3.26306	0.004	3.62247	1.68581-7.78399	0.004	3.62247	1.68789-7.77437	0.34759	0.01727	0.822	15.3436	20	0.75642	8.53967	19	0.98037
ebi-a-GCST90027731.csv	21	0.007	0.02763	0.00274-0.2785	0	2.38094	1.73691-3.26378	0	1.86063	1.48399-2.33286	0.004	2.40447	1.42645-4.05305	0.008	2.40447	1.34169-4.30907	0.701	0.00196	0.749	16.8646	20	0.66175	3.99031	19	0.9999
ebi-a-GCST90027734.csv	89	0.003	12.3867	2.47568-61.9756	0	0.34935	0.28392-0.42986	0	0.52273	0.45093-0.60597	0	0.33525	0.19325-0.58158	0.001	0.33525	0.18139-0.61961	-0.29846	0.00021	0.881	74.6903	88	0.84325	59.7174	87	0.9888
ebi-a-GCST90027736.csv	411	0	0.51969	0.36644-0.7370	0	0.74301	0.68239-0.80902	0	0.75291	0.70786-0.80082	0	0.59072	0.44855-0.77795	0.862	0.97628	0.74455-1.28013	0.04892	0.03522	1	100.785	410	1	96.3209	409	1
ebi-a-GCST90027737.csv	69	0.081	2.76585	0.89911-8.5083	0	0.40336	0.30606-0.53158	0	0.51539	0.42704-0.62202	0.002	0.34271	0.17763-0.66120	0.002	0.35087	0.18390-0.66944	-0.15549	0.00411	0.517	68.8098	68	0.44974	59.9766	67	0.71606
ebi-a-GCST90027747.csv	89	0.003	12.4361	2.50198-61.8138	0	0.34897	0.28588-0.42600	0	0.52263	0.45079-0.60591	0	0.335	0.18897-0.59385	0.001	0.335	0.18056-0.62152	-0.29866	0.0002	0.884	74.7475	88	0.84209	59.6101	87	0.9891
ebi-a-GCST90027748.csv	367	0.825	1.04579	0.70265-1.5565	0	0.69594	0.63606-0.76145	0	0.70818	0.65972-0.76020	0.001	0.58818	0.42868-0.80702	0	0.59236	0.44257-0.79284	-0.04571	0.05163	1	77.5444	366	1	73.7316	365	1
ebi-a-GCST90027752.csv	89	0.003	12.4632	2.50831-61.9268	0	0.34899	0.28126-0.43303	0	0.52265	0.45081-0.60593	0	0.33501	0.18982-0.59125	0.001	0.33501	0.18375-0.61076	-0.29887	0.00019	0.87	74.754	88	0.84196	59.5896	87	0.98916
ebi-a-GCST90027754.csv	385	0	0.37169	0.25245-0.5472	0	0.76458	0.70076-0.83420	0	0.79327	0.74334-0.84656	0.002	0.61215	0.45185-0.82931	0.846	0.97346	0.74274-1.27585	0.095	0.00012	1	186.006	384	1	170.823	383	1
ebi-a-GCST90027764.csv	106	0.068	0.6028	0.35219-1.0317	0.217	1.09466	0.94825-1.26368	0	1.36457	1.22206-1.52371	0.821	1.04479	0.71514-1.52639	0.808	1.04479	0.73400-1.48717	0.12981	0.003	0.154	119.587	105	0.1565	109.829	104	0.32893
ebi-a-GCST90027769.csv	64	0.003	2.51355	1.40279-4.5038	0	1.55102	1.25291-1.92006	0	1.61843	1.37556-1.90419	0.137	1.52875	0.87961-2.65695	0.113	1.52007	0.91204-2.53348	-0.05433	0.12852	1	28.208	63	0.99995	25.8348	62	0.99999
ebi-a-GCST90027774.csv	61	0.001	0.19712	0.07793-0.4986	0.001	1.65592	1.22243-2.24312	0	2.07029	1.66699-2.57115	0.001	5.34728	2.08287-13.72789	0.954	0.97975	0.49099-1.95505	0.23778	0	0.049	83.2117	60	0.02537	57.5342	59	0.5297
ebi-a-GCST90027776.csv	35	0.86	0.86144	0.16718-4.4388	0	2.11779	1.50456-2.98096	0	1.77977	1.41387-2.24038	0.017	3.16846	1.28743-7.79784	0.013	3.07375	1.33371-7.08392	0.08926	0.38725	0.315	38.8872	34	0.25899	38.0031	33	0.25194
ebi-a-GCST90027778.csv	49	0	0.02318	0.01168-0.0460	0	0.09681	0.06890-0.13602	0	0.15121	0.11827-0.19332	0	0.09246	0.04483-0.19069	0	0.09312	0.04082-0.21241	0.25064	0	0.517	60.1488	48	0.11213	28.0965	47	0.98699
ebi-a-GCST90027783.csv	29	0.036	5.01694	1.19359-21.0874	0	1.43148	1.20889-1.69506	0	1.3025	1.14871-1.47687	0.041	1.43254	1.03071-1.99104	0.032	1.43475	1.04805-1.96412	-0.31118	0.0756	0.998	11.3012	28	0.99785	7.88648	27	0.99987
ebi-a-GCST90027784.csv	14	0.924	2.56126	0.00000-419181775.4818	0	0.5911	0.47901-0.72941	0	0.59428	0.50332-0.70169	0.01	0.58868	0.41662-0.83179	0.012	0.58868	0.41236-0.84038	-0.39085	0.88218	1	0.04256	13	1	0.01963	12	1
ebi-a-GCST90027785.csv	187	0	0.08684	0.04342-0.1737	0	0.55442	0.51313-0.59902	0	0.58684	0.55391-0.62173	0	0.55211	0.43846-0.69522	0	0.55211	0.43701-0.69753	0.41567	0	1	41.3942	186	1	12.0071	185	1
ebi-a-GCST90027787.csv	42	0.222	0.5085	0.17452-1.4816	0	2.04336	1.69746-2.45974	0	1.75728	1.53260-2.01489	0	2.16293	1.45778-3.20916	0.001	2.156	1.43995-3.22813	0.17861	0.02727	0.992	24.1801	41	0.98304	18.9289	40	0.99812
ebi-a-GCST90027788.csv	52	0.003	0.07064	0.01348-0.3701	0	2.16016	1.81761-2.56726	0	1.67572	1.47642-1.90192	0	2.24477	1.56078-3.22851	0	2.24477	1.46908-3.43004	0.49219	0.00045	0.754	46.2442	51	0.66268	32.1198	50	0.97681
ebi-a-GCST90027796.csv	94	0.051	3.29631	1.00976-10.7607	0	1.80911	1.47724-2.21553	0	1.46301	1.25308-1.70811	0.011	1.92138	1.17084-3.15304	0.014	1.90882	1.14802-3.17382	-0.07915	0.17797	1	26.7904	93	1	24.9478	92	1
ebi-a-GCST90027803.csv	13	0.282	1.89467	0.62555-5.7386	0	1.7286	1.29715-2.30355	0	1.49424	1.19724-1.86491	0.044	1.78718	1.07848-2.96161	0.043	1.78718	1.08069-2.95554	-0.06802	0.67649	0.929	5.53904	12	0.93752	5.35535	11	0.91274
ebi-a-GCST90027808.csv	94	0.193	1.44477	0.83330-2.5049	0	0.5071	0.44794-0.57408	0	0.66238	0.60436-0.72596	0	0.49574	0.36106-0.68065	0	0.49574	0.36260-0.67775	-0.11434	0.00595	0.542	94.8222	93	0.42796	86.8914	92	0.63097
ebi-a-GCST90027812.csv	23	0.1	0.10997	0.00890-1.3581	0	2.03496	1.36918-3.02447	0	2.13509	1.60262-2.84447	0.045	2.18015	1.06311-4.47088	0.056	2.13523	1.02235-4.45952	0.31687	0.02999	0.929	13.9676	22	0.90263	8.54825	21	0.99235
ebi-a-GCST90027814.csv	41	0	5.85859	2.63899-13.0061	0	2.01431	1.46517-2.76929	0	1.60953	1.23799-2.09258	0.015	3.23691	1.30720-8.01529	0.001	3.23691	1.66177-6.30508	-0.21688	0.00195	0.024	63.9886	40	0.00937	49.8738	39	0.11384
ebi-a-GCST90027819.csv	86	0.001	18.5738	3.71722-92.8074	0	0.34813	0.27939-0.43378	0	0.50182	0.43176-0.58324	0	0.33426	0.19406-0.57574	0.001	0.33426	0.17435-0.64082	-0.34088	3e-05	0.953	65.8193	85	0.93905	46.2915	84	0.99973
ebi-a-GCST90027820.csv	21	0.393	0.56516	0.15699-2.0345	0.054	0.64648	0.41467-1.00787	0	0.52705	0.38230-0.72659	0.022	0.26414	0.09232-0.75575	0.875	0.92487	0.35317-2.42202	-0.00875	0.91314	0.313	23.7848	20	0.25192	23.7695	19	0.20514
ebi-a-GCST90027821.csv	55	0.353	0.67692	0.29912-1.5319	0	1.97637	1.61569-2.41757	0	1.46681	1.27285-1.69033	0.002	2.09618	1.35081-3.25285	0.003	2.09618	1.30813-3.35899	0.0955	0.06499	0.795	46.965	54	0.74017	43.4138	53	0.82334
ebi-a-GCST90027828.csv	63	0	9.06521	5.30175-15.5002	0.402	1.09238	0.88856-1.34294	0	1.34259	1.14686-1.57172	0.007	2.66194	1.33628-5.30272	0.516	0.83755	0.49230-1.42491	-0.34086	0	0.005	95.2955	62	0.0042	43.6997	61	0.95382
ebi-a-GCST90027833.csv	49	0	0.22181	0.13336-0.3689	0	1.36396	1.14869-1.61956	0	1.57201	1.37816-1.79313	0.017	2.35974	1.19878-4.64503	0.011	2.35974	1.25188-4.44799	0.37172	0	0.034	71.304	48	0.01613	11.7038	47	1
ebi-a-GCST90027834.csv	51	0	0.44784	0.29427-0.6815	0.618	0.96356	0.83281-1.11484	0	0.8018	0.72636-0.88507	0.014	0.55892	0.35682-0.87550	0.013	0.55892	0.35918-0.86974	0.13173	0.00753	0.311	56.3239	50	0.25029	48.5519	49	0.4912
ebi-a-GCST90027838.csv	31	0.002	0.15431	0.05331-0.4466	0.219	1.29887	0.85638-1.96999	0	2.37955	1.65828-3.41455	0.623	1.16513	0.63769-2.12883	0.616	1.16513	0.64567-2.10252	0.31068	1e-05	0.012	49.8433	30	0.01288	22.4887	29	0.7994
ebi-a-GCST90027839.csv	49	0.07	0.42404	0.17106-1.0511	0.002	1.53438	1.17151-2.00966	0	1.74406	1.43772-2.11568	0.205	1.45545	0.82121-2.57953	0.214	1.46725	0.80813-2.66397	0.16589	0.00305	0.824	39.9136	48	0.79037	30.1491	47	0.97338
ebi-a-GCST90027842.csv	212	0.897	1.01999	0.75620-1.3758	0	1.12865	1.06288-1.19848	0	1.14237	1.09042-1.19679	0.191	1.13063	0.94115-1.35826	0.17	1.13063	0.94926-1.34665	0.02176	0.45327	1	22.5734	211	1	22.0088	210	1
ebi-a-GCST90027845.csv	45	0.994	0.99836	0.65883-1.5129	0.003	0.83785	0.74700-0.93974	0	0.80191	0.73554-0.87427	0.008	0.71192	0.56022-0.90469	0.006	0.71309	0.56717-0.89655	-0.0691	0.29672	1	8.55209	44	1	7.43626	43	1
ebi-a-GCST90027846.csv	38	0.516	20.5456	0.00247-170940.3269	0.002	0.69716	0.55469-0.87622	0	0.66755	0.55558-0.80209	0.141	0.70208	0.44262-1.11365	0.142	0.70208	0.44214-1.11485	-0.41541	0.46156	1	0.78961	37	1	0.23571	36	1
ebi-a-GCST90027847.csv	57	0.664	1.31473	0.38535-4.4856	0	0.41161	0.32006-0.52935	0	0.52463	0.43682-0.63009	0.001	0.39887	0.23870-0.66652	0.002	0.40068	0.23373-0.68689	-0.08389	0.14356	1	26.2582	56	0.99976	24.0564	55	0.99991
ebi-a-GCST90027852.csv	59	0.262	0.47431	0.13038-1.7255	0	1.64881	1.27764-2.12781	0	1.69112	1.39324-2.05269	0.149	1.5546	0.86072-2.80787	0.128	1.52697	0.89221-2.61332	0.12822	0.05591	0.999	27.9968	58	0.9997	24.1883	57	0.99996
ebi-a-GCST90027856.csv	25	0	0.09375	0.03613-0.2432	0.008	0.53183	0.33373-0.84750	0	0.34623	0.25484-0.47040	0.193	0.55678	0.23616-1.31266	0.173	0.56228	0.25170-1.25607	0.14482	0.00936	0.604	23.6494	24	0.48179	15.6053	23	0.87164
ebi-a-GCST90027477.csv	78	0.498	0.79907	0.41889-1.5243	0	0.71839	0.61513-0.83898	0.001	0.83717	0.75256-0.93128	0.042	0.68041	0.47199-0.98085	0.049	0.68318	0.47005-0.99294	0.0077	0.88644	0.999	47.727	77	0.99646	47.7064	76	0.99545
ebi-a-GCST90027509.csv	46	0.833	1.09718	0.46481-2.5899	0.071	0.77457	0.58720-1.02174	0.001	0.7068	0.57487-0.86902	0.531	1.28787	0.58732-2.82404	0.539	1.27515	0.59100-2.75132	-0.06442	0.30686	0.125	56.2715	45	0.12094	54.937	44	0.12486
ebi-a-GCST90027515.csv	37	0.23	0.507	0.17039-1.5086	0.001	0.63976	0.49188-0.83210	0.001	0.71706	0.59317-0.86682	0.085	0.61984	0.36497-1.05270	0.103	0.61984	0.35386-1.08575	0.04919	0.53101	0.998	14.3798	36	0.99951	13.9795	35	0.99942
ebi-a-GCST90027605.csv	35	0.893	0.94089	0.38902-2.2756	0.04	1.35437	1.01427-1.80851	0.001	1.51027	1.18975-1.91715	0.435	1.30729	0.67256-2.54104	0.363	1.28474	0.75450-2.18761	0.07574	0.2834	0.016	54.8717	34	0.01315	52.9632	33	0.01521
ebi-a-GCST90027636.csv	22	0.023	0.19609	0.05388-0.7136	0.012	0.65976	0.47762-0.91135	0.001	0.66818	0.53169-0.83971	0.022	0.44283	0.23285-0.84220	0.023	0.45191	0.23954-0.85255	0.20551	0.07348	0.498	21.787	21	0.41187	18.2188	20	0.573
ebi-a-GCST90027755.csv	88	0.384	1.17902	0.81528-1.7051	0	1.50837	1.35091-1.68418	0.001	1.18474	1.07513-1.30553	0.01	1.41	1.09009-1.82379	0	1.51677	1.27870-1.79916	0.00104	0.97881	<0.001	157.939	87	1e-05	157.938	86	0
ebi-a-GCST90027771.csv	43	0.963	1.0214	0.41615-2.5070	0.801	1.02961	0.82075-1.29163	0.001	1.29681	1.10650-1.51985	0.993	0.99754	0.58144-1.71141	0.992	0.99754	0.61746-1.61160	0.04111	0.59934	0.885	31.4316	42	0.88349	31.1513	41	0.86738
ebi-a-GCST90027801.csv	12	0.834	0.76249	0.06442-9.0251	0	2.231	1.42825-3.48492	0.001	1.79928	1.28743-2.51461	0.045	2.29166	1.11471-4.71128	0.047	2.29166	1.10994-4.73152	0.11307	0.50753	0.978	3.89917	11	0.97277	3.4268	10	0.96953
ebi-a-GCST90027830.csv	34	0.117	0.44374	0.16535-1.1908	0.015	1.33449	1.05659-1.68548	0.001	1.35139	1.12909-1.61746	0.019	1.82156	1.13249-2.92989	0.025	1.78889	1.09984-2.90962	0.1578	0.03154	0.995	16.5694	33	0.99234	11.5124	32	0.99967
ebi-a-GCST90027844.csv	60	0.75	0.81997	0.24359-2.7602	0	1.51499	1.20425-1.90592	0.001	1.34753	1.13427-1.60090	0.097	1.56625	0.93046-2.63648	0.116	1.56625	0.90277-2.71737	0.05416	0.42105	1	20.1946	59	1	19.5379	58	1
ebi-a-GCST90027500.csv	32	0.431	1.47664	0.56692-3.8462	0.335	0.917	0.76877-1.09381	0.002	0.82029	0.72234-0.93153	0.749	0.94319	0.66158-1.34467	0.75	0.94671	0.67765-1.32260	-0.12118	0.23408	0.717	26.6193	31	0.69116	25.1446	30	0.71798
ebi-a-GCST90027502.csv	43	0	0.0417	0.01595-0.1090	0.549	1.14235	0.73894-1.76598	0.002	1.82338	1.24447-2.67160	0.075	6.57896	0.87093-49.69698	0.312	0.51434	0.14399-1.83730	0.35695	0	<0.001	107.313	42	0	42.1545	41	0.4208
ebi-a-GCST90027565.csv	58	0.064	0.25993	0.06441-1.0490	0	1.71994	1.33498-2.21590	0.002	1.34075	1.11264-1.61562	0.052	1.74438	1.00590-3.02502	0.038	1.74438	1.04390-2.91490	0.15654	0.02369	1	29.8602	57	0.99886	24.4521	56	0.99992
ebi-a-GCST90027637.csv	66	0.006	7.55254	1.85183-30.8024	0	0.4109	0.31943-0.52855	0.002	0.71928	0.58499-0.88440	0	0.37501	0.22352-0.62916	0.001	0.37501	0.21843-0.64384	-0.27704	0.00154	0.005	103.5	65	0.00169	88.3737	64	0.02349
ebi-a-GCST90027698.csv	44	0.022	4.16433	1.28421-13.5038	0.381	1.16675	0.82633-1.64742	0.002	0.68562	0.54255-0.86642	0.64	1.22155	0.53069-2.81178	0.592	1.22155	0.59047-2.52714	-0.17433	0.00381	0.382	45.4323	43	0.37103	36.0472	42	0.72884
ebi-a-GCST90027707.csv	42	0.697	1.57946	0.16071-15.5230	0.033	1.42584	1.02863-1.97643	0.002	1.45823	1.14353-1.85954	0.808	0.91652	0.45586-1.84270	0.78	0.90615	0.45621-1.79984	-0.00642	0.94542	1	17.1171	41	0.99963	17.1124	40	0.99942
ebi-a-GCST90027454.csv	72	0.386	1.58579	0.56288-4.4676	0.04	0.77762	0.61142-0.98900	0.003	0.75121	0.62331-0.90534	0.29	0.74826	0.43895-1.27553	0.269	0.74012	0.43582-1.25688	-0.08992	0.15506	1	14.5711	71	1	12.505	70	1
ebi-a-GCST90027507.csv	66	0.024	3.59388	1.21434-10.6362	0.004	1.42023	1.11613-1.80719	0.003	1.32436	1.09861-1.59650	0.248	1.38496	0.80072-2.39549	0.212	1.38496	0.83503-2.29705	-0.10955	0.0718	1	21.6958	65	1	18.3443	64	1
ebi-a-GCST90027544.csv	59	0	0.07672	0.04418-0.1332	0	0.56175	0.43380-0.72744	0.003	0.69697	0.54770-0.88693	0	0.3293	0.20337-0.53321	0	0.3293	0.21776-0.49797	0.37785	0	<0.001	168.383	58	0	77.1345	57	0.03908
ebi-a-GCST90027612.csv	82	0.001	2.7469	1.54446-4.8855	0	1.4313	1.19003-1.72147	0.003	1.2271	1.07311-1.40320	0.053	1.51729	1.00146-2.29883	0.043	1.51729	1.01959-2.25796	-0.10912	0.00604	0.996	51.8622	81	0.99516	43.9068	80	0.99966
ebi-a-GCST90027617.csv	29	0.276	2.05357	0.57821-7.2935	0	1.93574	1.35464-2.76612	0.003	1.52948	1.15904-2.01832	0.051	2.24147	1.03122-4.87209	0.048	2.24147	1.04197-4.82183	-0.03406	0.64425	0.999	10.8787	28	0.99848	10.6606	27	0.99789
ebi-a-GCST90027654.csv	56	0.001	8.85101	2.61596-29.9471	0.014	1.43854	1.07642-1.92248	0.003	1.37705	1.11476-1.70106	0.243	1.42914	0.78997-2.58548	0.24	1.42914	0.79250-2.57723	-0.1746	0.00367	1	23.8201	55	0.99992	14.5917	54	1
ebi-a-GCST90027673.csv	43	0.62	1.77591	0.18604-16.9527	0.025	1.42538	1.04564-1.94302	0.003	1.44037	1.13236-1.83214	0.777	0.90596	0.45952-1.78617	0.772	0.90083	0.44623-1.81856	-0.01679	0.85572	1	17.5941	42	0.99967	17.5606	41	0.99949
ebi-a-GCST90027740.csv	56	0.001	8.85378	2.61633-29.9616	0.011	1.4386	1.08751-1.90304	0.003	1.37708	1.11477-1.70112	0.238	1.42907	0.79496-2.56899	0.199	1.42907	0.83375-2.44948	-0.17461	0.00367	1	23.8203	55	0.99992	14.5916	54	1
ebi-a-GCST90027823.csv	33	0.394	1.43858	0.63017-3.2841	0.017	1.21535	1.03622-1.42545	0.003	1.20836	1.06746-1.36785	0.368	1.16791	0.83672-1.63021	0.345	1.16259	0.85432-1.58209	-0.06032	0.67821	1	4.85191	32	1	4.67647	31	1
ebi-a-GCST90027840.csv	246	0.218	0.75055	0.47604-1.1834	0.004	1.17861	1.05230-1.32007	0.003	1.13478	1.04251-1.23522	0.329	1.18296	0.84470-1.65669	0.306	1.18296	0.85815-1.63072	0.04191	0.07133	1	54.4134	245	1	51.1327	244	1
ebi-a-GCST90027479.csv	183	0.098	3.24055	0.81074-12.9525	0	1.44707	1.24015-1.68851	0.004	1.18608	1.05479-1.33371	0.099	1.47989	0.93179-2.35039	0.134	1.47989	0.88843-2.46508	-0.07705	0.15532	1	68.0588	182	1	66.0227	181	1
ebi-a-GCST90027548.csv	37	0.43	0.54161	0.12006-2.4432	0.004	1.6672	1.17585-2.36386	0.004	1.45498	1.12434-1.88287	0.067	2.04113	0.97443-4.27557	0.056	2.02219	1.00382-4.07371	0.09514	0.20044	0.907	25.7101	36	0.89825	24.0073	35	0.91951
ebi-a-GCST90027559.csv	6	0.212	3.66995	0.65768-20.4788	0	0.43709	0.28106-0.67972	0.004	0.53725	0.35160-0.82091	0.034	0.42186	0.23489-0.75764	0.029	0.42186	0.24160-0.73660	-0.37527	0.08914	0.268	7.77761	5	0.16893	2.78366	4	0.59466
ebi-a-GCST90027684.csv	13	0.865	0.90891	0.30914-2.6724	0.002	2.13548	1.30683-3.48958	0.004	1.7665	1.19638-2.60830	0.07	2.33711	1.01296-5.39220	0.054	2.32886	1.07228-5.05799	0.08018	0.22178	0.965	4.4969	12	0.97271	2.81939	11	0.9929
ebi-a-GCST90027745.csv	13	0.866	0.90913	0.30913-2.6737	0.004	2.13535	1.27385-3.57948	0.004	1.76659	1.19645-2.60841	0.073	2.33719	1.00133-5.45519	0.061	2.32893	1.04518-5.18944	0.08016	0.22202	0.967	4.4952	12	0.97276	2.81955	11	0.9929
ebi-a-GCST90027815.csv	25	0.627	1.23689	0.53018-2.8856	0	0.59953	0.46723-0.76930	0.004	0.75662	0.62684-0.91325	0.046	0.58279	0.35218-0.96443	0.036	0.58279	0.36195-0.93839	-0.08898	0.25544	0.954	13.679	24	0.95357	12.3187	23	0.96525
ebi-a-GCST90027498.csv	36	0.214	2.45871	0.61141-9.8874	0.036	0.6904	0.48844-0.97588	0.005	0.69889	0.54354-0.89864	0.274	0.67274	0.33417-1.35435	0.245	0.67274	0.34874-1.29774	-0.12798	0.08053	0.871	25.4976	35	0.88039	22.2529	34	0.9393
ebi-a-GCST90027575.csv	12	0.339	1.61192	0.63538-4.0894	0.008	1.57963	1.12716-2.21372	0.005	1.45698	1.12195-1.89205	0.115	1.56825	0.93692-2.62501	0.132	1.53027	0.91730-2.55284	-0.02092	0.82903	0.844	6.60549	11	0.83007	6.55635	10	0.76656
ebi-a-GCST90027606.csv	47	0.667	0.90178	0.56487-1.4397	0.001	1.28639	1.10213-1.50146	0.005	1.16989	1.04930-1.30434	0.028	1.56086	1.06222-2.29356	0.021	1.56086	1.08190-2.25184	0.05887	0.26808	0.745	39.5348	46	0.73829	38.2773	45	0.75051
ebi-a-GCST90027658.csv	11	0.791	1.46565	0.09361-22.9477	0.025	2.07593	1.09766-3.92604	0.005	1.9292	1.22068-3.04897	0.137	2.26333	0.84015-6.09731	0.126	2.27819	0.86555-5.99641	0.02499	0.84702	0.781	6.63267	10	0.75961	6.59324	9	0.67939
ebi-a-GCST90027683.csv	11	0.791	1.4656	0.09373-22.9164	0.029	2.076	1.07772-3.99896	0.005	1.92925	1.22069-3.04911	0.126	2.26344	0.86792-5.90280	0.135	2.27831	0.84400-6.15015	0.025	0.84691	0.803	6.63266	10	0.75961	6.59318	9	0.67939
ebi-a-GCST90027744.csv	11	0.791	1.46607	0.09365-22.9515	0.02	2.07589	1.12408-3.83363	0.005	1.92918	1.22068-3.04890	0.132	2.26308	0.85268-6.00640	0.149	2.27795	0.81067-6.40091	0.02497	0.84717	0.783	6.63247	10	0.75963	6.59312	9	0.6794
ebi-a-GCST90027772.csv	72	0	22.8162	8.56632-60.7702	0	0.6164	0.50912-0.74630	0.005	0.82333	0.71900-0.94280	0.022	0.61077	0.40375-0.92392	0.022	0.61077	0.40378-0.92386	-0.36902	0	0.935	54.5451	71	0.92614	9.5112	70	1
ebi-a-GCST90027843.csv	18	0.607	1.50151	0.32838-6.8657	0	2.18473	1.42027-3.36067	0.005	1.54988	1.14019-2.10677	0.041	2.25944	1.09688-4.65420	0.04	2.25944	1.10058-4.63855	0.00502	0.96718	0.458	17.353	17	0.43071	17.3511	16	0.36324
ebi-a-GCST90027461.csv	47	0.14	2.96295	0.71781-12.2304	0.006	0.6524	0.48253-0.88207	0.006	0.72243	0.57297-0.91087	0.157	0.64465	0.35446-1.17244	0.175	0.64465	0.34501-1.20455	-0.11292	0.0541	1	14.0687	46	1	10.1573	45	1
ebi-a-GCST90027514.csv	39	0.427	0.6384	0.21332-1.9105	0.019	0.72229	0.55094-0.94693	0.006	0.74845	0.60821-0.92103	0.35	0.7768	0.46057-1.31014	0.389	0.7768	0.44035-1.37031	0.0243	0.77373	1	9.66157	38	1	9.57769	37	1
ebi-a-GCST90027519.csv	57	0.694	1.16988	0.53794-2.5442	0.196	1.21736	0.90382-1.63966	0.006	1.3421	1.09032-1.65203	0.957	0.97965	0.46669-2.05644	0.955	0.97965	0.47861-2.00521	0.0146	0.72055	0.798	47.3714	56	0.78743	47.2422	55	0.76215
ebi-a-GCST90027582.csv	29	0.38	0.55761	0.15474-2.0094	0.016	1.62546	1.09294-2.41744	0.006	1.48545	1.11729-1.97494	0.212	1.75711	0.74011-4.17157	0.204	1.74334	0.75511-4.02491	0.09354	0.13606	0.81	21.6221	28	0.79848	19.2613	27	0.86028
ebi-a-GCST90027480.csv	63	0.158	0.55652	0.24939-1.2419	0	1.7705	1.30671-2.39891	0.007	1.36825	1.08779-1.72103	0.02	2.15541	1.14625-4.05304	0.032	2.21341	1.08748-4.50508	0.09071	0.02576	0.066	79.4661	62	0.06679	73.1968	61	0.13618
ebi-a-GCST90027708.csv	33	0.682	1.28378	0.39241-4.1999	0.026	0.67227	0.47387-0.95373	0.007	0.6891	0.52690-0.90123	0.328	0.69241	0.33502-1.43108	0.266	0.68564	0.35671-1.31786	-0.06559	0.299	1	8.45317	32	0.99999	7.33741	31	1
ebi-a-GCST90027569.csv	17	0.479	2.62266	0.19425-35.4093	0.079	1.62181	0.94501-2.78332	0.009	1.6948	1.14340-2.51211	0.402	1.51258	0.58922-3.88295	0.308	1.58026	0.67458-3.70191	-0.03726	0.74403	0.986	6.39627	16	0.98322	6.28563	15	0.97454
ebi-a-GCST90027829.csv	23	0.959	0.9882	0.63392-1.5405	0.044	1.19562	1.00483-1.42263	0.009	1.19946	1.04639-1.37491	0.63	1.08179	0.78907-1.48311	0.719	1.06564	0.75749-1.49913	0.05276	0.37893	0.992	8.91939	22	0.99374	8.11148	21	0.99465
ebi-a-GCST90027598.csv	13	0.929	0.92136	0.15896-5.3403	0.058	0.57369	0.32295-1.01910	0.01	0.55395	0.35389-0.86711	0.234	0.56658	0.23279-1.37898	0.25	0.57175	0.23080-1.41635	-0.05553	0.56912	0.997	3.22719	12	0.99372	2.88275	11	0.99219
ebi-a-GCST90027781.csv	38	0	0.19037	0.09509-0.3811	0.187	0.85539	0.67814-1.07896	0.01	0.81289	0.69464-0.95128	0.793	0.92973	0.54097-1.59787	0.703	0.90466	0.54314-1.50682	0.26148	0.00016	0.437	37.601	37	0.44157	19.9051	36	0.98632
ebi-a-GCST90027482.csv	31	0.265	1.91712	0.62338-5.8959	0.003	1.83836	1.23057-2.74635	0.011	1.45033	1.09090-1.92819	0.024	2.5157	1.17393-5.39105	0.03	2.49564	1.13345-5.49490	-0.03076	0.61859	0.684	26.0153	30	0.67435	25.7621	29	0.63818
ebi-a-GCST90027583.csv	80	0	0.35887	0.20888-0.6165	0.505	1.08605	0.85208-1.38426	0.011	0.80297	0.67738-0.95185	0.717	1.11717	0.61518-2.02881	0.73	1.11717	0.59653-2.09223	0.09211	0.00292	0.99	53.2358	79	0.98849	43.7952	78	0.99939
ebi-a-GCST90027630.csv	41	0.949	0.90919	0.04923-16.7924	0.066	0.74779	0.54840-1.01968	0.011	0.72962	0.57187-0.93087	0.44	0.77924	0.41649-1.45795	0.468	0.77924	0.39985-1.51860	-0.01884	0.88278	1	5.85544	40	1	5.83341	39	1
ebi-a-GCST90027641.csv	14	0.101	4.95181	0.84590-28.9873	0.074	0.57516	0.31378-1.05426	0.011	0.52984	0.32426-0.86574	0.522	0.69592	0.23652-2.04763	0.553	0.68751	0.20583-2.29641	-0.23359	0.02513	0.219	16.6413	13	0.21623	10.1019	12	0.60702
ebi-a-GCST90027672.csv	69	0.018	0.57077	0.36224-0.8993	0.004	0.76515	0.63854-0.91687	0.011	0.83354	0.72394-0.95972	0.197	0.76554	0.51216-1.14429	0.221	0.76554	0.50081-1.17023	0.07351	0.09059	1	11.5834	68	1	8.63511	67	1
ebi-a-GCST90027562.csv	52	0.401	0.63628	0.22354-1.8111	0.031	0.78204	0.62585-0.97722	0.013	0.81083	0.68756-0.95619	0.303	0.78022	0.48897-1.24495	0.322	0.78022	0.47956-1.26938	0.03448	0.64754	1	21.6061	51	0.9999	21.3945	50	0.99987
ebi-a-GCST90027773.csv	27	0.065	3.12446	0.98032-9.9582	0.066	0.79805	0.62718-1.01546	0.014	0.80015	0.66961-0.95613	0.257	0.75919	0.47639-1.20986	0.251	0.7685	0.49511-1.19284	-0.2331	0.02811	0.547	24.701	26	0.53595	19.2671	25	0.78414
ebi-a-GCST90027532.csv	35	0.543	1.17938	0.69656-1.9969	0.045	1.19029	1.00358-1.41174	0.015	1.18244	1.03251-1.35414	0.312	1.19009	0.85343-1.65956	0.3	1.19009	0.86064-1.64565	0.00074	0.9921	1	0.9426	34	1	0.9425	33	1
ebi-a-GCST90027594.csv	119	0.001	5.72247	2.03076-16.1253	0.382	1.08687	0.90186-1.30982	0.016	1.18886	1.03343-1.36768	0.778	1.07389	0.65556-1.75919	0.761	1.07976	0.65927-1.76846	-0.14258	0.00329	1	49.694	118	1	40.6908	117	1
ebi-a-GCST90027484.csv	37	0.051	0.36912	0.14057-0.9693	0.01	0.64561	0.46199-0.90221	0.017	0.74269	0.58168-0.94826	0.139	0.61955	0.33303-1.15258	0.125	0.62423	0.34654-1.12445	0.08085	0.15126	0.988	19.9295	36	0.98617	17.7769	35	0.99312
ebi-a-GCST90027822.csv	50	0.015	2.51682	1.23200-5.1415	0.345	1.06533	0.93408-1.21503	0.017	1.13317	1.02244-1.25589	0.725	1.05107	0.79734-1.38556	0.732	1.05107	0.79166-1.39548	-0.14315	0.03173	1	13.3825	49	1	8.4875	48	1
ebi-a-GCST90027681.csv	77	0	0.46207	0.31325-0.6816	0	0.77642	0.67501-0.89306	0.019	0.87977	0.79056-0.97904	0.059	0.71185	0.50297-1.00748	0.058	0.71185	0.50390-1.00563	0.11242	0.00116	1	41.4068	76	0.99959	29.9997	75	1
ebi-a-GCST90027726.csv	79	0	0.46794	0.31716-0.6904	0.001	0.77662	0.67262-0.89670	0.019	0.88098	0.79262-0.97919	0.054	0.7079	0.50083-1.00060	0.06	0.71093	0.50104-1.00875	0.11026	0.00141	1	43.1123	78	0.99954	32.1343	77	1
ebi-a-GCST90027810.csv	77	0	0.46385	0.31500-0.6830	0.001	0.77667	0.67162-0.89815	0.019	0.87959	0.79040-0.97885	0.058	0.71171	0.50326-1.00651	0.053	0.71171	0.50673-0.99960	0.11175	0.00118	1	41.3897	76	0.99959	30.0176	75	1
ebi-a-GCST90027539.csv	58	0.87	1.11803	0.29430-4.2473	0.011	0.69606	0.52669-0.91991	0.02	0.78276	0.63697-0.96191	0.243	0.68806	0.36976-1.28035	0.212	0.68806	0.38493-1.22988	-0.02987	0.5983	0.999	25.6713	57	0.99989	25.3905	56	0.99986
ebi-a-GCST90027767.csv	30	0.151	0.30817	0.06466-1.4687	0.031	1.21335	1.01785-1.44640	0.02	1.17342	1.02507-1.34325	0.2	1.22666	0.90371-1.66501	0.227	1.22666	0.88670-1.69696	0.24375	0.10318	1	7.26261	29	0.99999	4.42476	28	1
ebi-a-GCST90027703.csv	64	0.004	5.4657	1.77458-16.8343	0	1.49861	1.23693-1.81565	0.021	1.17545	1.02475-1.34832	0.16	1.51425	0.85422-2.68425	0.155	1.51425	0.86068-2.66411	-0.19526	0.00902	0.204	72.6506	63	0.18994	65.0273	62	0.37174
ebi-a-GCST90027719.csv	104	0.437	0.51084	0.09454-2.7601	0.147	1.17374	0.94517-1.45758	0.021	1.20846	1.02834-1.42012	0.521	1.17476	0.71974-1.91744	0.515	1.17476	0.72432-1.90531	0.08159	0.31727	1	8.73072	103	1	7.72068	102	1
ebi-a-GCST90027450.csv	38	0.77	0.80362	0.18735-3.4471	0.815	1.04981	0.69830-1.57828	0.023	0.69608	0.50912-0.95169	0.577	1.27195	0.54995-2.94182	0.575	1.24502	0.58232-2.66187	-0.01281	0.84406	0.048	51.8242	37	0.05362	51.7678	36	0.04303
ebi-a-GCST90027779.csv	41	0	0.13246	0.05110-0.3434	0.16	1.30523	0.90052-1.89182	0.024	1.39422	1.04510-1.85998	0.32	0.56874	0.18973-1.70485	0.277	0.58003	0.22025-1.52746	0.24974	1e-05	0.014	63.587	40	0.01023	38.6957	39	0.48362
ebi-a-GCST90027584.csv	23	0.3	1.75842	0.62085-4.9804	0.185	1.26575	0.89312-1.79385	0.025	1.34287	1.03742-1.73825	0.599	1.20611	0.60607-2.40022	0.628	1.18857	0.59647-2.36843	-0.03458	0.60581	0.996	9.24814	22	0.99194	8.97364	21	0.98942
ebi-a-GCST90027857.csv	33	0.03	0.43307	0.21032-0.8918	0.373	0.90052	0.71522-1.13383	0.025	0.82564	0.69802-0.97659	0.835	0.95035	0.59007-1.53060	0.801	0.94174	0.59276-1.49618	0.10851	0.08156	0.996	15.7849	32	0.9927	12.544	31	0.99868
ebi-a-GCST90027535.csv	53	0.015	6.5725	1.52109-28.3993	0.256	1.21136	0.86987-1.68690	0.026	1.37492	1.03919-1.81911	0.958	1.02325	0.43964-2.38155	0.999	0.9996	0.41695-2.39645	-0.14978	0.03783	0.006	83.5885	52	0.00357	76.7474	51	0.01136
ebi-a-GCST90027802.csv	104	0.269	0.35232	0.05593-2.2193	0.127	1.17214	0.95609-1.43702	0.027	1.19881	1.02060-1.40815	0.533	1.17122	0.71369-1.92205	0.538	1.17122	0.70961-1.93312	0.11608	0.19343	1	8.95034	103	1	7.2365	102	1
ebi-a-GCST90027735.csv	36	0.004	0.14124	0.04146-0.4812	0.005	0.76754	0.63686-0.92504	0.03	0.85433	0.74108-0.98489	0.185	0.76408	0.51725-1.12868	0.153	0.76408	0.53258-1.09621	0.32826	0.00654	1	9.41377	35	1	1.0189	34	1
ebi-a-GCST90027837.csv	9	0.851	1.3033	0.09013-18.8462	0.281	1.47159	0.72915-2.97001	0.03	1.81168	1.05889-3.09966	0.715	1.24451	0.40019-3.87021	0.693	1.26387	0.41123-3.88434	0.03068	0.81223	0.687	5.87646	8	0.66107	5.81561	7	0.56144
ebi-a-GCST90027510.csv	19	0.012	8.98899	1.95954-41.2352	0.078	0.62126	0.36581-1.05509	0.031	0.6614	0.45457-0.96233	0.441	0.65561	0.22912-1.87595	0.486	0.67461	0.22799-1.99612	-0.24837	0.003	0.418	18.7601	18	0.40673	6.7915	17	0.98609
ebi-a-GCST90027712.csv	17	0.073	4.7518	0.97481-23.1632	0.014	1.85862	1.13648-3.03963	0.031	1.48249	1.03741-2.11853	0.118	2.08769	0.87246-4.99559	0.108	2.0538	0.89739-4.70037	-0.12365	0.15975	0.825	11.1759	16	0.7985	8.98751	15	0.87817
ebi-a-GCST90027841.csv	125	0.462	1.16888	0.77255-1.7685	0.126	1.1074	0.97179-1.26193	0.031	1.11672	1.01033-1.23432	0.566	1.10472	0.78698-1.55077	0.579	1.10472	0.77776-1.56914	-0.00834	0.82417	1	43.7191	124	1	43.6695	123	1
ebi-a-GCST90027469.csv	93	0	23.6649	10.12921-55.2886	0.011	0.74166	0.58854-0.93463	0.035	1.21184	1.01366-1.44876	0.171	0.69628	0.41614-1.16502	0.18	0.69628	0.41170-1.17757	-0.26551	0	0.256	101.92	92	0.22503	52.8396	91	0.99954
ebi-a-GCST90027459.csv	42	0.025	0.40495	0.18901-0.8676	0.079	0.75875	0.55753-1.03260	0.036	0.79621	0.64359-0.98504	0.101	0.59054	0.31928-1.09228	0.119	0.66	0.39560-1.10109	0.06808	0.07761	0.884	31.131	41	0.86796	27.8503	40	0.92651
ebi-a-GCST90027757.csv	175	0	7.59198	3.47255-16.5982	0.125	0.89242	0.77164-1.03210	0.036	0.89314	0.80340-0.99291	0.971	0.99307	0.68226-1.44546	0.972	0.99307	0.67523-1.46050	-0.2395	0	1	102.389	174	1	73.0952	173	1
ebi-a-GCST90027826.csv	71	0.263	0.86331	0.66865-1.1146	0.114	0.91646	0.82256-1.02107	0.037	0.91945	0.84972-0.99491	0.958	1.00682	0.78097-1.29798	0.887	1.0177	0.80005-1.29456	0.0157	0.61295	1	33.443	70	0.99994	33.1848	69	0.99992
ebi-a-GCST90027476.csv	46	0.051	0.45379	0.21000-0.9806	0.02	1.46236	1.06120-2.01519	0.038	1.28546	1.01388-1.62979	0.09	1.87385	0.92042-3.81490	0.08	1.84213	0.94380-3.59552	0.10791	0.00789	0.988	26.4567	45	0.98751	18.7064	44	0.99971
ebi-a-GCST90027793.csv	59	0.003	0.09971	0.02317-0.4291	0.207	1.21044	0.89998-1.62801	0.038	1.252	1.01281-1.54769	0.044	1.9916	1.03516-3.83172	0.051	1.9916	1.01277-3.91646	0.22103	0.00111	1	29.1076	58	0.99945	17.3135	57	1
ebi-a-GCST90027628.csv	24	0.065	0.29194	0.08444-1.0094	0.382	0.81973	0.52504-1.27981	0.039	0.71113	0.51458-0.98277	0.316	0.63115	0.26184-1.52136	0.722	0.86198	0.38367-1.93659	0.10346	0.15989	0.321	25.4766	23	0.32619	23.2413	22	0.38821
ebi-a-GCST90027610.csv	10	0.518	2.54634	0.16957-38.2363	0.722	0.88347	0.44597-1.75018	0.041	0.57665	0.34030-0.97716	0.919	0.93847	0.28670-3.07191	0.911	0.93847	0.31916-2.75952	-0.15429	0.30539	0.239	12.4349	9	0.18989	10.8142	8	0.21245
ebi-a-GCST90027602.csv	64	0.113	2.32279	0.83100-6.4926	0.331	1.15079	0.86698-1.52750	0.042	0.80568	0.65394-0.99264	0.405	1.42618	0.62162-3.27210	0.337	1.45379	0.68088-3.10404	-0.09828	0.04362	0.254	70.8343	63	0.23276	66.2975	62	0.33108
ebi-a-GCST90027753.csv	39	0.027	0.39909	0.18272-0.8716	0.016	0.8324	0.71696-0.96643	0.042	0.8836	0.78442-0.99531	0.231	0.83223	0.61899-1.11893	0.217	0.83223	0.62493-1.10830	0.17801	0.05092	1	6.01441	38	1	1.9432	37	1
ebi-a-GCST90027775.csv	33	0.38	0.52032	0.12367-2.1891	0.443	1.16708	0.78632-1.73220	0.044	1.31895	1.00737-1.72690	0.795	1.12905	0.45516-2.80066	0.762	1.1386	0.49508-2.61862	0.09236	0.20602	0.457	32.1092	32	0.46134	30.4408	31	0.49463
ebi-a-GCST90027581.csv	61	0	35.5946	6.26268-202.3062	0.001	0.63135	0.48123-0.82828	0.048	0.81289	0.66204-0.99811	0.117	0.57889	0.29531-1.13477	0.096	0.57285	0.30060-1.09168	-0.30021	7e-05	0.999	29.459	60	0.99969	11.0276	59	1
ebi-a-GCST90027804.csv	5	0.967	0.94087	0.06728-13.1582	0.162	0.70479	0.43159-1.15092	0.048	0.68469	0.47003-0.99740	0.404	0.75285	0.41452-1.36731	0.403	0.75575	0.42027-1.35906	-0.07965	0.82679	0.747	2.18329	4	0.70209	2.12636	3	0.5466
ebi-a-GCST90027805.csv	24	0	0.04549	0.01875-0.1104	0.116	0.76433	0.54676-1.06846	0.048	0.75408	0.57002-0.99756	0.069	0.38622	0.14555-1.02483	0.086	0.38622	0.13663-1.09177	0.50055	0	0.003	51.5646	23	0.00057	11.2042	22	0.97171
ebi-a-GCST90027689.csv	74	0.946	1.01317	0.69510-1.4768	0.004	1.24758	1.07386-1.44939	0.058	1.11768	0.99607-1.25414	0.176	1.25705	0.90571-1.74468	0.143	1.2608	0.92780-1.71331	0.02041	0.59334	1	35.778	73	0.99993	35.4903	72	0.99991
ebi-a-GCST90027770.csv	48	0.695	0.83989	0.35257-2.0008	0.925	1.01057	0.81137-1.25866	0.06	1.17262	0.99343-1.38413	0.905	0.97026	0.59352-1.58613	0.919	0.97426	0.59247-1.60208	0.04759	0.44659	0.999	22.2145	47	0.99921	21.6251	46	0.99916
ebi-a-GCST90027790.csv	86	0.833	1.15173	0.31228-4.2477	0.035	0.80495	0.65766-0.98524	0.065	0.86255	0.73716-1.00926	0.177	0.72532	0.45664-1.15209	0.189	0.72096	0.44420-1.17014	-0.03222	0.66295	1	17.5897	85	1	17.3984	84	1
ebi-a-GCST90027824.csv	86	0.154	2.15144	0.75760-6.1097	0.028	0.7885	0.63765-0.97503	0.065	0.86034	0.73314-1.00960	0.389	0.78697	0.45768-1.35319	0.395	0.78697	0.45418-1.36360	-0.08072	0.08521	1	31.2524	85	1	28.2187	84	1
ebi-a-GCST90027624.csv	28	0	3.52678	1.96457-6.3313	0.111	1.19932	0.95896-1.49993	0.066	1.16919	0.99000-1.38081	0.065	1.61336	0.99161-2.62496	0.064	1.62009	0.99198-2.64590	-0.22018	0.00068	0.906	17.9719	27	0.90438	3.09066	26	1
ebi-a-GCST90027678.csv	30	0.804	0.78022	0.11243-5.4143	0.004	1.42274	1.11813-1.81032	0.066	1.18316	0.98908-1.41533	0.127	1.43406	0.91452-2.24873	0.136	1.43406	0.90423-2.27433	0.05633	0.67547	0.915	19.7373	29	0.90091	19.5583	28	0.88003
ebi-a-GCST90027574.csv	26	0.52	1.87468	0.28437-12.3586	0.083	1.44152	0.95374-2.17876	0.067	1.33909	0.98000-1.82977	0.321	1.47789	0.69383-3.14796	0.327	1.47789	0.68752-3.17684	-0.03231	0.72602	0.996	10.4031	25	0.99542	10.2774	24	0.9933
ebi-a-GCST90027625.csv	97	0.45	1.6582	0.44840-6.1321	0.012	1.30956	1.06029-1.61744	0.068	1.15785	0.98939-1.35499	0.349	1.30229	0.75132-2.25730	0.33	1.30229	0.76784-2.20875	-0.02957	0.58893	1	21.3402	96	1	21.0462	95	1
ebi-a-GCST90027534.csv	14	0.459	3.6724	0.13083-103.0863	0.038	1.89741	1.03730-3.47072	0.069	1.48639	0.96949-2.27887	0.124	2.19217	0.86071-5.58335	0.108	2.17148	0.90145-5.23081	-0.07929	0.60172	0.531	12.1608	13	0.51451	11.8734	12	0.4559
ebi-a-GCST90027659.csv	13	0.497	1.85615	0.33113-10.4048	0.291	1.34485	0.77622-2.33004	0.072	1.4338	0.96787-2.12404	0.476	1.35074	0.60679-3.00678	0.48	1.35845	0.59559-3.09843	-0.02961	0.76866	0.618	10.1026	12	0.60696	10.0117	11	0.52934
ebi-a-GCST90027474.csv	20	0.749	1.209	0.38388-3.8076	0.304	0.83868	0.59972-1.17285	0.075	0.79581	0.61896-1.02319	0.731	0.90548	0.51880-1.58036	0.777	0.91732	0.50920-1.65256	-0.0611	0.47344	0.839	12.9491	19	0.84117	12.4129	18	0.8252
ebi-a-GCST90027670.csv	128	0.151	1.44833	0.87614-2.3942	0.026	1.15953	1.01795-1.32080	0.075	1.09014	0.99143-1.19867	0.332	1.17847	0.84697-1.63972	0.419	1.16482	0.80557-1.68427	-0.03933	0.2614	1	81.5107	127	0.99942	80.238	126	0.9995
ebi-a-GCST90027720.csv	52	0.628	0.78229	0.29126-2.1012	0.023	1.29079	1.03568-1.60873	0.075	0.86307	0.73408-1.01472	0.321	1.33695	0.75755-2.35952	0.261	1.33695	0.81018-2.20625	0.01385	0.84412	0.01	76.4741	51	0.01199	76.4144	50	0.00949
ebi-a-GCST90027530.csv	26	0.993	1.01407	0.05349-19.2245	0.347	0.83292	0.56914-1.21895	0.078	0.76749	0.57198-1.02981	0.663	0.85302	0.42074-1.72943	0.668	0.85797	0.42954-1.71373	-0.02398	0.85359	0.996	9.82157	25	0.99711	9.78677	24	0.99537
ebi-a-GCST90027671.csv	56	0.517	0.83612	0.48806-1.4324	0.019	1.26356	1.03977-1.53552	0.078	1.14285	0.98512-1.32583	0.298	1.27742	0.80935-2.01620	0.317	1.27742	0.79397-2.05527	0.04335	0.24172	1	21.4788	55	0.99999	20.0777	54	0.99999
ebi-a-GCST90027595.csv	138	0.089	2.01876	0.90367-4.5099	0.078	0.85636	0.72060-1.01769	0.079	0.88499	0.77204-1.01447	0.499	0.85516	0.54412-1.34402	0.528	0.85516	0.52654-1.38889	-0.08383	0.04323	1	13.7661	137	1	9.60218	136	1
ebi-a-GCST90027597.csv	54	0.829	0.91479	0.40951-2.0435	0.06	0.88108	0.77216-1.00536	0.081	0.915	0.82817-1.01093	0.309	0.85868	0.64192-1.14864	0.296	0.86138	0.65284-1.13653	4e-05	0.99956	1	23.8028	53	0.99982	23.8028	52	0.99973
ebi-a-GCST90027679.csv	58	0.939	0.97647	0.53306-1.7887	0.011	0.74418	0.59339-0.93328	0.081	0.86119	0.72795-1.01882	0.247	0.73123	0.43268-1.23580	0.227	0.73123	0.44252-1.20832	-0.01771	0.67361	0.75	49.5202	57	0.74875	49.3409	56	0.72319
ebi-a-GCST90027591.csv	104	0.407	0.7492	0.37958-1.4787	0.414	1.06066	0.92082-1.22172	0.087	1.09407	0.98690-1.21289	0.743	1.05952	0.75055-1.49567	0.76	1.05952	0.73190-1.53379	0.0492	0.27207	1	33.34	103	1	32.1206	102	1
ebi-a-GCST90027704.csv	43	0.11	0.58463	0.30724-1.1125	0.052	1.26185	0.99833-1.59492	0.088	1.15544	0.97884-1.36391	0.325	1.2847	0.78476-2.10312	0.347	1.2847	0.76666-2.15278	0.08862	0.03766	0.791	34.8889	42	0.77358	30.2746	41	0.89095
ebi-a-GCST90027732.csv	25	0.692	1.2462	0.42569-3.6482	0.053	1.45854	0.99479-2.13847	0.089	1.26378	0.96502-1.65504	0.059	2.03918	1.00791-4.12562	0.06	1.99029	1.00409-3.94514	0.00148	0.97914	0.53	23.255	24	0.50479	23.2542	23	0.44601
ebi-a-GCST90027552.csv	47	0.04	4.90128	1.12510-21.3514	0.024	0.69027	0.50084-0.95134	0.09	0.81178	0.63794-1.03298	0.262	0.66438	0.32793-1.34600	0.24	0.66438	0.33880-1.30282	-0.19117	0.01927	1	14.0755	46	1	8.18279	45	1
ebi-a-GCST90027538.csv	109	0	2.32729	1.87676-2.8860	0.221	1.06669	0.96199-1.18278	0.095	1.06564	0.98904-1.14817	0.624	1.06501	0.82831-1.36934	0.61	1.06501	0.83680-1.35545	-0.20753	0	0.222	119.606	108	0.20954	62.806	107	0.99979
ebi-a-GCST90027766.csv	37	0.112	0.56578	0.28530-1.1220	0.049	0.7469	0.55856-0.99874	0.095	0.82621	0.66048-1.03353	0.197	0.65173	0.34401-1.23471	0.207	0.65994	0.35028-1.24334	0.04184	0.25917	0.999	15.3555	36	0.99898	14.04	35	0.99939
ebi-a-GCST90027835.csv	34	0.562	2.06268	0.18350-23.1862	0.245	0.84844	0.64295-1.11959	0.098	0.83011	0.66585-1.03488	0.573	0.86085	0.51383-1.44223	0.59	0.86085	0.50167-1.47717	-0.08935	0.46445	0.992	16.2912	33	0.99343	15.743	32	0.99287
ebi-a-GCST90027758.csv	64	0.782	0.9452	0.63574-1.4053	0.007	1.25792	1.06550-1.48508	0.105	1.10762	0.97869-1.25353	0.211	1.2708	0.87615-1.84322	0.156	1.27461	0.91493-1.77568	0.03276	0.41263	0.997	35.3183	63	0.99814	34.6379	62	0.99809
ebi-a-GCST90027560.csv	32	0.671	1.12636	0.65443-1.9386	0.692	0.96657	0.81694-1.14360	0.106	0.89846	0.78909-1.02299	0.899	0.9785	0.70159-1.36472	0.898	0.9785	0.70343-1.36115	-0.04786	0.40734	0.997	12.0541	31	0.99911	11.3478	30	0.99919
ebi-a-GCST90027458.csv	36	0.851	1.10475	0.39260-3.1087	0.07	1.27743	0.97987-1.66536	0.113	1.18203	0.96109-1.45377	0.398	1.27642	0.72950-2.23339	0.339	1.27642	0.77913-2.09110	0.00746	0.89675	1	11.288	35	0.99995	11.2709	34	0.99992
ebi-a-GCST90027633.csv	49	0.074	2.28536	0.94036-5.5541	0.014	0.7091	0.53840-0.93392	0.113	0.85429	0.70325-1.03776	0.227	0.69673	0.39081-1.24211	0.204	0.69673	0.40193-1.20777	-0.10573	0.03089	0.448	48.4376	48	0.45518	43.485	47	0.61895
ebi-a-GCST90027710.csv	19	0.191	0.23101	0.02800-1.9057	0.004	2.12438	1.28058-3.52418	0.114	1.39168	0.92390-2.09631	0.095	2.36174	0.90746-6.14663	0.073	2.33989	0.97625-5.60826	0.16902	0.10788	0.094	26.7822	18	0.08317	22.9015	17	0.15248
ebi-a-GCST90027616.csv	29	0.321	1.54029	0.66656-3.5593	0.718	1.07167	0.73577-1.56091	0.131	1.24331	0.93720-1.64942	0.877	1.0632	0.49162-2.29935	0.888	1.05645	0.49372-2.26055	-0.02683	0.59878	0.915	18.371	28	0.91642	18.0875	27	0.90082
ebi-a-GCST90027733.csv	15	0.188	0.24245	0.03289-1.7872	0.929	0.9859	0.72130-1.34756	0.132	1.19974	0.94657-1.52062	0.947	0.98157	0.57471-1.67647	0.946	0.98157	0.58051-1.65972	0.33812	0.1381	0.951	6.64653	14	0.94748	4.14979	13	0.98949
ebi-a-GCST90027557.csv	165	0.35	0.79164	0.48554-1.2907	0.114	1.06839	0.98413-1.15986	0.136	1.04836	0.98519-1.11558	0.416	1.08648	0.89028-1.32591	0.481	1.0811	0.87068-1.34236	0.05147	0.2579	1	42.5042	164	1	41.2152	163	1
ebi-a-GCST90027455.csv	39	0.022	3.82396	1.27026-11.5116	0.001	0.57023	0.40758-0.79778	0.14	0.83189	0.65151-1.06222	0.061	0.53141	0.27970-1.00963	0.061	0.53413	0.28267-1.00929	-0.13815	0.00845	0.878	28.2598	38	0.87531	20.5199	37	0.98707
ebi-a-GCST90027497.csv	9	0.137	25.8817	0.58047-1153.9950	0.015	0.38186	0.17516-0.83248	0.141	0.65252	0.36956-1.15211	0.128	0.33647	0.09551-1.18543	0.13	0.33884	0.09639-1.19106	-0.31081	0.09643	0.403	8.8032	8	0.35917	5.11964	7	0.64537
ebi-a-GCST90027832.csv	79	0	11.2603	6.34924-19.9701	0.09	0.80285	0.62264-1.03523	0.142	1.16019	0.95163-1.41446	0.313	0.70552	0.35993-1.38294	0.295	0.70552	0.36878-1.34977	-0.23727	0	0.002	114.675	78	0.00435	48.8753	77	0.99486
ebi-a-GCST90027589.csv	47	0.563	0.71574	0.23207-2.2075	0.292	1.12922	0.90076-1.41561	0.149	1.12482	0.95868-1.31976	0.233	1.35115	0.82962-2.20052	0.196	1.4045	0.84563-2.33272	0.05701	0.43095	0.842	36.7509	46	0.83321	36.1193	45	0.82494
ebi-a-GCST90027619.csv	22	0.144	2.90745	0.73478-11.5044	0.226	1.21659	0.88574-1.67101	0.152	1.1835	0.93976-1.49045	0.352	1.32688	0.74088-2.37638	0.469	0.81013	0.46286-1.41793	-0.12265	0.20867	0.981	10.2818	21	0.97502	8.59392	20	0.98715
ebi-a-GCST90027751.csv	39	0.957	1.03526	0.29992-3.5735	0.124	1.30354	0.92986-1.82740	0.153	1.20502	0.93303-1.55629	0.392	1.40678	0.64943-3.04733	0.346	1.42891	0.68644-2.97444	0.01548	0.80741	0.98	22.6043	38	0.97749	22.544	37	0.9705
ebi-a-GCST90027572.csv	34	0.971	0.97773	0.29592-3.2304	0.223	1.27448	0.86267-1.88286	0.158	1.22298	0.92458-1.61768	0.527	1.28706	0.59397-2.78891	0.542	1.28706	0.57695-2.87119	0.02207	0.70827	0.889	23.7299	33	0.88209	23.5874	32	0.85896
ebi-a-GCST90027564.csv	19	0.378	2.11465	0.41834-10.6894	0.312	1.24508	0.81393-1.90462	0.163	1.2535	0.91279-1.72139	0.773	0.89497	0.42618-1.87941	0.762	0.88467	0.40568-1.92920	-0.05306	0.52751	0.972	8.17128	18	0.97598	7.75519	17	0.9715
ebi-a-GCST90027522.csv	48	0.007	0.17922	0.05416-0.5931	0.988	1.0022	0.76132-1.31929	0.171	0.86083	0.69446-1.06706	0.999	1.00047	0.57124-1.75223	0.999	1.00047	0.55350-1.80841	0.13624	0.0121	1	19.4459	47	0.99987	12.6198	46	1
ebi-a-GCST90027563.csv	15	0.343	0.73399	0.39671-1.3580	0.937	1.01131	0.76618-1.33488	0.172	1.15509	0.93919-1.42063	0.835	0.95116	0.59817-1.51246	0.873	0.96612	0.63781-1.46343	0.10849	0.15112	0.308	16.6367	14	0.27606	14.1111	13	0.36607
ebi-a-GCST90027816.csv	34	0.003	0.2759	0.12722-0.5983	0.509	0.90822	0.68272-1.20821	0.176	1.14364	0.94162-1.38901	0.459	0.7764	0.40026-1.50604	0.382	0.77139	0.43423-1.37033	0.18374	0.00076	0.667	29.2101	33	0.65641	15.3749	32	0.99423
ebi-a-GCST90027730.csv	13	0.081	7.64669	0.96170-60.8004	0.169	0.68195	0.39515-1.17690	0.178	0.75	0.49368-1.13941	0.185	0.49864	0.18899-1.31564	0.219	0.50559	0.18042-1.41688	-0.2117	0.04661	0.838	7.31797	12	0.83591	2.29543	11	0.99716
ebi-a-GCST90027472.csv	8	0.03	0.14185	0.03682-0.5466	0.36	1.25215	0.77383-2.02614	0.179	1.31671	0.88136-1.96708	0.576	1.27189	0.56879-2.84414	0.684	1.18607	0.53895-2.61020	0.43967	0.01581	0.15	11.3447	7	0.12427	0.257	6	0.99968
ebi-a-GCST90027811.csv	167	0.03	2.26577	1.09076-4.7065	0.828	1.01271	0.90371-1.13484	0.181	0.94077	0.86025-1.02883	0.928	1.01504	0.73615-1.39959	0.923	1.01504	0.74928-1.37508	-0.12428	0.01872	1	18.7832	166	1	13.145	165	1
ebi-a-GCST90027760.csv	6	0.602	0.36969	0.01176-11.6166	0.417	0.85289	0.58081-1.25243	0.182	0.8072	0.58923-1.10579	0.565	0.85346	0.51544-1.41316	0.582	0.85529	0.50814-1.43960	0.23976	0.67879	0.997	0.44135	5	0.99411	0.24259	4	0.99321
ebi-a-GCST90027462.csv	53	0.542	1.35987	0.51014-3.6250	0.233	1.08978	0.94616-1.25520	0.189	0.93281	0.84090-1.03476	0.479	1.11524	0.82648-1.50489	0.503	1.1129	0.81569-1.51842	-0.06308	0.45207	1	23.555	52	0.99977	22.9808	51	0.99975
ebi-a-GCST90027603.csv	13	0.906	0.91116	0.20044-4.1420	0.342	0.74548	0.40673-1.36637	0.191	0.74587	0.48072-1.15725	0.57	0.73739	0.26547-2.04825	0.519	0.73111	0.28999-1.84323	-0.02344	0.7916	0.801	7.6582	12	0.81124	7.58489	11	0.74993
ebi-a-GCST90027490.csv	84	0.695	1.30822	0.34390-4.9766	0.136	1.2007	0.94389-1.52738	0.193	0.89123	0.74928-1.06007	0.351	1.34957	0.72088-2.52656	0.35	1.33882	0.72855-2.46028	-0.03334	0.57167	0.996	48.9917	83	0.99892	48.6692	82	0.99873
ebi-a-GCST90027600.csv	82	0.496	1.15891	0.75954-1.7683	0.887	1.01048	0.87518-1.16670	0.193	0.93148	0.83715-1.03645	0.79	1.04661	0.74921-1.46206	0.815	1.04119	0.74311-1.45884	-0.03431	0.29808	0.996	50.3071	81	0.99706	49.2101	80	0.99735
ebi-a-GCST90027453.csv	102	0	1319.29	313.36215-5554.3542	0.02	0.70778	0.52848-0.94791	0.196	1.19797	0.91082-1.57565	0	6.72318	3.16428-14.28480	0.024	0.51353	0.29085-0.90671	-0.59351	0	<0.001	291.418	101	0	151.014	100	0.00075
ebi-a-GCST90027492.csv	38	0.262	6.55099	0.25903-165.6796	0.002	0.48582	0.30747-0.76762	0.197	1.32749	0.86339-2.04107	0.257	5.52164	0.30128-101.19513	0.004	0.41047	0.23437-0.71887	-0.16023	0.33497	<0.001	126.65	37	0	123.377	36	0
ebi-a-GCST90027727.csv	171	0.038	2.19898	1.05198-4.5966	0.825	1.01261	0.90631-1.13139	0.197	0.94352	0.86378-1.03061	0.928	1.01455	0.74073-1.38959	0.93	1.01455	0.73433-1.40170	-0.12007	0.02475	1	17.9902	170	1	12.8574	169	1
ebi-a-GCST90027722.csv	39	0.75	1.10218	0.60824-1.9973	0.156	1.13175	0.95401-1.34261	0.202	1.09279	0.95355-1.25237	0.362	1.16538	0.84191-1.61313	0.425	1.16538	0.80334-1.69058	-0.00165	0.97703	1	3.16409	38	1	3.16325	37	1
ebi-a-GCST90027621.csv	28	0.012	0.0813	0.01312-0.5038	0.34	0.82989	0.56586-1.21714	0.205	0.82967	0.62159-1.10741	0.445	0.71055	0.29973-1.68448	0.415	0.71751	0.32704-1.57422	0.23653	0.01789	0.491	26.3448	27	0.49954	19.9543	26	0.79372
ebi-a-GCST90027795.csv	10	0.158	8.09001	0.58140-112.5703	0.54	0.88304	0.59293-1.31509	0.205	0.8154	0.59453-1.11830	0.559	0.84409	0.48832-1.45907	0.644	0.87753	0.51389-1.49849	-0.58763	0.12404	0.242	12.0006	9	0.21328	8.7652	8	0.36249
ebi-a-GCST90027806.csv	40	0.721	1.11301	0.62102-1.9948	0.163	1.13094	0.95121-1.34463	0.21	1.0896	0.95272-1.24615	0.383	1.16498	0.82958-1.63598	0.376	1.16283	0.83558-1.61825	-0.00408	0.9419	1	3.22489	39	1	3.21951	38	1
ebi-a-GCST90027592.csv	143	0	4.14591	2.12255-8.0981	0.07	0.84537	0.70486-1.01388	0.223	1.08906	0.94937-1.24931	0.391	0.8068	0.49498-1.31505	0.388	0.81029	0.50325-1.30465	-0.12446	0.0001	1	38.1078	142	1	22.1197	141	1
ebi-a-GCST90027656.csv	17	0.084	3.69149	0.92433-14.7426	0.634	0.89591	0.57011-1.40791	0.223	0.80766	0.57288-1.13868	0.133	0.48443	0.19734-1.18920	0.51	1.35883	0.55722-3.31360	-0.18022	0.04222	0.903	9.48817	16	0.89196	4.55811	15	0.99525
ebi-a-GCST90027742.csv	17	0.084	3.692	0.92427-14.7477	0.644	0.89576	0.56121-1.42972	0.223	0.80765	0.57286-1.13866	0.106	0.48443	0.21146-1.10975	0.478	1.35883	0.59413-3.10778	-0.18024	0.04223	0.895	9.48793	16	0.89197	4.55839	15	0.99525
ebi-a-GCST90027555.csv	18	0.197	0.32659	0.06415-1.6626	0.153	0.70128	0.43101-1.14104	0.225	0.79818	0.55472-1.14849	0.365	0.69503	0.32310-1.49513	0.375	0.69916	0.32385-1.50939	0.08765	0.28584	0.963	7.8878	17	0.96889	6.66854	16	0.97913
ebi-a-GCST90027567.csv	25	0.014	5.59107	1.56193-20.0137	0.826	0.95359	0.62482-1.45534	0.232	1.20575	0.88705-1.63895	0.714	0.8563	0.37761-1.94178	0.699	0.8563	0.39331-1.86430	-0.18156	0.02335	0.992	10.2738	24	0.99332	4.37275	23	0.99999
ebi-a-GCST90027517.csv	22	0.566	1.55387	0.35332-6.8337	0.476	1.19634	0.73037-1.95959	0.237	0.7969	0.54708-1.16081	0.308	1.5932	0.66486-3.81775	0.352	1.54551	0.63104-3.78519	-0.06842	0.37167	0.14	28.228	21	0.1338	27.0965	20	0.13257
ebi-a-GCST90027457.csv	17	0.512	1.78089	0.33089-9.5848	0.66	1.11637	0.68411-1.82175	0.238	1.26352	0.85685-1.86319	0.897	0.94324	0.39578-2.24798	0.944	0.96846	0.40314-2.32654	-0.03364	0.68705	0.999	4.25121	16	0.9984	4.08248	15	0.99745
ebi-a-GCST90027496.csv	17	0.387	0.70105	0.32086-1.5317	0.127	1.23223	0.94266-1.61076	0.244	1.12773	0.92121-1.38056	0.176	1.35403	0.88968-2.06074	0.21	1.32065	0.86984-2.00511	0.11394	0.23611	0.645	13.9756	16	0.60053	12.4522	15	0.64453
ebi-a-GCST90027626.csv	105	0.335	0.74818	0.41574-1.3465	0.014	0.87995	0.79433-0.97481	0.248	1.04502	0.96983-1.12604	0.329	0.84413	0.60154-1.18455	0.278	0.84413	0.62242-1.14480	0.06527	0.26376	0.986	75.6591	104	0.98347	74.3965	103	0.98488
ebi-a-GCST90027570.csv	21	0.291	2.24915	0.52035-9.7216	0.222	1.32097	0.84539-2.06409	0.25	1.21608	0.87117-1.69755	0.354	1.52185	0.63915-3.62360	0.26	1.57298	0.73080-3.38572	-0.06381	0.40829	0.943	11.7344	20	0.92491	11.0194	19	0.92319
ebi-a-GCST90027768.csv	61	0.956	1.01233	0.65907-1.5549	0.394	1.05099	0.93753-1.17817	0.254	1.05376	0.96314-1.15291	0.664	1.06142	0.81214-1.38723	0.639	1.06142	0.82819-1.36034	0.00763	0.85201	1	5.89728	60	1	5.86217	59	1
ebi-a-GCST90027546.csv	69	0.001	5.62326	2.09941-15.0619	0.29	0.8569	0.64368-1.14074	0.258	0.88716	0.72091-1.09176	0.028	0.40103	0.18024-0.89227	0.034	0.40859	0.18192-0.91768	-0.18122	0.00038	0.044	86.5106	68	0.06444	71.5432	67	0.32952
ebi-a-GCST90027650.csv	55	0.483	0.69963	0.25960-1.8855	0.344	1.14371	0.86593-1.51061	0.266	1.12657	0.91314-1.38990	0.973	1.0101	0.56394-1.80922	0.973	1.0101	0.56250-1.81384	0.04851	0.33958	1	19.8371	54	0.99999	18.9084	53	1
ebi-a-GCST90027531.csv	18	0.113	0.30363	0.07525-1.2250	0.995	1.00176	0.57639-1.74105	0.27	1.27044	0.83049-1.94346	0.596	0.77715	0.31131-1.94003	0.69	0.84119	0.36499-1.93866	0.15577	0.05255	0.187	21.6142	17	0.20001	16.9654	16	0.38784
ebi-a-GCST90027561.csv	21	0.162	2.58513	0.71972-9.2854	0.878	0.97021	0.65982-1.42662	0.28	0.86282	0.66002-1.12794	0.641	1.18806	0.58181-2.42603	0.611	1.20378	0.59529-2.43427	-0.13044	0.10164	0.568	18.0548	20	0.5838	15.0956	19	0.7165
ebi-a-GCST90027578.csv	36	0.406	1.47723	0.59563-3.6637	0.722	0.93697	0.65471-1.34092	0.28	1.15447	0.88939-1.49856	0.277	0.62082	0.26651-1.44616	0.303	0.63062	0.26569-1.49679	-0.02366	0.58228	0.804	27.9595	35	0.79515	27.6511	34	0.77083
ebi-a-GCST90027763.csv	20	0.039	0.22326	0.05972-0.8347	0.089	0.67422	0.42794-1.06223	0.28	0.82479	0.58163-1.16960	0.223	0.57118	0.23892-1.36548	0.248	0.5825	0.23941-1.41728	0.1638	0.06034	0.299	21.9349	19	0.28751	17.9184	18	0.46104
ebi-a-GCST90027749.csv	80	0.058	0.32558	0.10404-1.0189	0.003	0.70389	0.55929-0.88587	0.282	0.90843	0.76249-1.08230	0.193	0.68986	0.39617-1.20124	0.207	0.68986	0.38936-1.22227	0.10064	0.07831	1	25.469	79	1	22.2862	78	1
ebi-a-GCST90027511.csv	23	0.387	0.59875	0.19200-1.8673	0.917	0.98562	0.75093-1.29367	0.286	0.89993	0.74160-1.09208	0.482	1.23873	0.68876-2.22784	0.42	1.25941	0.72621-2.18411	0.05973	0.48396	0.855	15.2996	22	0.84906	14.7919	21	0.83325
ebi-a-GCST90027493.csv	13	0.06	0.50676	0.26872-0.9556	0.698	1.04696	0.83021-1.32030	0.289	0.91559	0.77777-1.07783	0.532	1.15136	0.74923-1.76931	0.564	1.14543	0.73108-1.79463	0.16963	0.08576	0.382	12.7506	12	0.38743	9.18822	11	0.60452
ebi-a-GCST90027508.csv	49	0.242	0.38868	0.08138-1.8563	0.855	1.02978	0.75143-1.41125	0.296	1.13164	0.89718-1.42739	0.853	1.06627	0.54182-2.09835	0.849	1.06627	0.55184-2.06024	0.09252	0.18201	0.899	36.2524	48	0.89326	34.4174	47	0.91394
ebi-a-GCST90027645.csv	64	0.968	0.98046	0.37928-2.5345	0.275	0.86347	0.66326-1.12412	0.298	0.89793	0.73305-1.09990	0.697	0.89311	0.50725-1.57248	0.72	0.90746	0.53507-1.53903	-0.00867	0.85326	1	20.9819	63	1	20.9474	62	1
ebi-a-GCST90027529.csv	18	0.415	0.39339	0.04417-3.5038	0.501	1.17844	0.73013-1.90203	0.31	1.20479	0.84063-1.72670	0.924	1.04359	0.43849-2.48374	0.929	1.0361	0.47779-2.24681	0.10283	0.32426	0.986	7.49283	17	0.97622	6.45842	16	0.98234
ebi-a-GCST90027542.csv	34	0.278	2.24816	0.53292-9.4839	0.936	1.01536	0.70108-1.47052	0.311	0.86942	0.66314-1.13986	0.797	1.09851	0.53908-2.23848	0.804	1.09851	0.52609-2.29376	-0.09021	0.19716	0.987	18.1231	33	0.98333	16.3884	32	0.98986
ebi-a-GCST90027791.csv	46	0.275	0.62203	0.26811-1.4431	0.107	1.20984	0.95974-1.52511	0.315	1.0913	0.92036-1.29399	0.218	0.69743	0.39610-1.22800	0.222	0.69743	0.39442-1.23322	0.07472	0.1883	0.263	51.5298	45	0.23358	49.5199	44	0.26242
ebi-a-GCST90027827.csv	250	0.022	0.81228	0.68061-0.9694	0.007	0.91191	0.85327-0.97457	0.319	0.97443	0.92599-1.02540	0.359	0.90825	0.73965-1.11527	0.378	0.90825	0.73349-1.12463	0.04533	0.03617	1	80.1045	249	1	75.6672	248	1
ebi-a-GCST90027489.csv	91	0	2.06692	1.47214-2.9020	0.01	1.14458	1.03212-1.26929	0.336	1.03872	0.96133-1.12233	0.282	1.15343	0.89089-1.49335	0.288	1.15343	0.88785-1.49846	-0.21334	0.0001	1	29.3689	90	1	12.7074	89	1
ebi-a-GCST90027448.csv	7	0.799	8736.99	0.00000-598449237693625000000000000000000.0000	0.335	0.87238	0.66110-1.15118	0.343	0.89794	0.71875-1.12182	0.511	0.8718	0.59324-1.28115	0.495	0.8718	0.60220-1.26209	-3.70895	0.79717	1	0.16226	6	0.99992	0.08878	5	0.99988
ebi-a-GCST90027620.csv	62	0.494	1.42761	0.51782-3.9358	0.44	1.06948	0.90168-1.26852	0.346	1.06514	0.93409-1.21459	0.927	1.01607	0.72373-1.42652	0.924	1.01872	0.69837-1.48600	-0.04265	0.57022	1	5.56363	61	1	5.23774	60	1
ebi-a-GCST90027706.csv	50	0.064	2.51192	0.97033-6.5027	0.758	1.03464	0.83331-1.28461	0.346	1.07705	0.92300-1.25682	0.921	1.02453	0.63583-1.65083	0.908	1.02453	0.68091-1.54155	-0.10245	0.08335	0.951	33.5992	49	0.95428	30.4719	48	0.9772
ebi-a-GCST90027750.csv	64	0.001	8.60747	2.47605-29.9221	0.01	1.41949	1.08687-1.85390	0.369	1.09467	0.89871-1.33336	0.291	1.4688	0.72424-2.97881	0.221	1.4688	0.79879-2.70082	-0.18967	0.00168	0.995	36.3342	63	0.99718	25.5404	62	0.99999
ebi-a-GCST90027718.csv	26	0.579	1.56127	0.32997-7.3872	0.845	1.03964	0.70474-1.53368	0.37	1.14494	0.85166-1.53922	0.984	0.99248	0.48242-2.04183	0.994	0.99704	0.44662-2.22579	-0.03037	0.69386	1	8.03917	25	0.99947	7.88045	24	0.99919
ebi-a-GCST90027817.csv	88	0.062	0.3894	0.14631-1.0364	0.268	1.09659	0.93165-1.29073	0.375	0.94522	0.83466-1.07042	0.613	1.10659	0.74849-1.63602	0.606	1.10659	0.75421-1.62361	0.10125	0.07695	1	21.526	87	1	18.3213	86	1
ebi-a-GCST90027634.csv	67	0.602	1.25057	0.54177-2.8867	0.906	0.98929	0.82707-1.18333	0.394	0.94443	0.82804-1.07717	0.806	0.94719	0.61589-1.45669	0.768	0.94719	0.66123-1.35681	-0.04277	0.50767	0.989	43.1929	66	0.98662	42.7491	65	0.9851
ebi-a-GCST90027609.csv	51	0.185	3.00279	0.60337-14.9440	0.175	0.83156	0.63690-1.08573	0.398	0.91204	0.73684-1.12889	0.508	0.81763	0.45258-1.47716	0.503	0.81763	0.45534-1.46821	-0.0979	0.14838	1	7.38636	50	1	5.23011	49	1
ebi-a-GCST90027505.csv	14	0.747	1.40114	0.18901-10.3866	0.094	1.61433	0.92143-2.82828	0.399	1.20725	0.77961-1.86948	0.248	1.82861	0.68762-4.86289	0.223	1.81692	0.72843-4.53193	-0.01416	0.88377	0.898	7.20984	13	0.89102	7.18754	12	0.84498
ebi-a-GCST90027700.csv	10	0.227	0.25729	0.03363-1.9684	0.124	0.6138	0.32968-1.14281	0.401	0.79525	0.46612-1.35679	0.258	0.46664	0.13561-1.60574	0.233	0.47679	0.15301-1.48569	0.13436	0.29309	0.196	12.74	9	0.17473	10.999	8	0.20175
ebi-a-GCST90027652.csv	83	0.049	0.31441	0.10087-0.9801	0.003	0.70542	0.55961-0.88922	0.402	0.92911	0.78229-1.10347	0.226	0.68867	0.37838-1.25344	0.175	0.68867	0.40350-1.17539	0.10602	0.06237	1	27.2669	82	1	23.6959	81	1
ebi-a-GCST90027738.csv	83	0.049	0.31386	0.10066-0.9786	0.003	0.70551	0.56225-0.88527	0.402	0.9291	0.78232-1.10342	0.197	0.68853	0.39249-1.20787	0.17	0.68853	0.40593-1.16788	0.10621	0.06202	1	27.2665	82	1	23.6857	81	1
ebi-a-GCST90027525.csv	37	0.118	0.49076	0.20563-1.1713	0.215	1.23068	0.88673-1.70803	0.403	1.11523	0.86383-1.43979	0.735	1.13662	0.54459-2.37226	0.762	1.11651	0.55088-2.26293	0.09573	0.06113	0.937	24.1589	36	0.93394	20.4154	35	0.97651
ebi-a-GCST90027576.csv	29	0.552	1.61798	0.33860-7.7316	0.513	1.1332	0.77882-1.64884	0.406	1.12107	0.85606-1.46814	0.647	1.19978	0.55541-2.59174	0.677	1.19066	0.52782-2.68588	-0.03856	0.64443	0.803	21.3639	28	0.80985	21.146	27	0.7794
ebi-a-GCST90027724.csv	38	0.006	0.40493	0.22142-0.7406	0.434	0.92259	0.75383-1.12911	0.406	0.93953	0.81095-1.08850	0.347	0.81677	0.53869-1.23839	0.347	0.82875	0.56316-1.21958	0.14747	0.00781	0.89	27.0562	37	0.88494	19.117	36	0.99055
ebi-a-GCST90027580.csv	17	0.027	3.5171	1.29031-9.5869	0.186	1.20614	0.91350-1.59252	0.409	0.90091	0.70321-1.15419	0.319	1.27672	0.80182-2.03288	0.316	1.27672	0.80363-2.02830	-0.30025	0.01574	0.002	34.3823	16	0.00482	23.0135	15	0.08385
ebi-a-GCST90027853.csv	100	0.001	0.53031	0.37229-0.7554	0.092	0.91347	0.82215-1.01494	0.415	0.968	0.89527-1.04665	0.512	0.9182	0.71196-1.18418	0.501	0.9182	0.71670-1.17635	0.12578	0.00092	0.998	62.7019	99	0.99834	51.0171	98	0.99998
ebi-a-GCST90027640.csv	156	0	12.4864	6.29127-24.7819	0.461	1.06137	0.90582-1.24363	0.416	1.05116	0.93199-1.18558	0.061	1.62241	0.98103-2.68309	0.036	1.62241	1.03649-2.53953	-0.25327	0	1	83.9154	155	1	32.2519	154	1
ebi-a-GCST90027715.csv	8	0.915	1.1347	0.12406-10.3787	0.305	0.85543	0.63494-1.15249	0.42	0.90763	0.71700-1.14895	0.52	0.84973	0.53047-1.36112	0.521	0.85267	0.53687-1.35421	-0.04449	0.84894	0.593	5.83699	7	0.55891	5.79744	6	0.44626
ebi-a-GCST90027655.csv	23	0.051	0.2348	0.05972-0.9232	0.047	0.67244	0.45468-0.99447	0.432	0.89404	0.67592-1.18255	0.243	0.60924	0.27100-1.36964	0.276	0.60495	0.25066-1.46001	0.17944	0.06398	0.761	16.7436	22	0.77735	12.9202	21	0.91139
ebi-a-GCST90027677.csv	23	0.05	0.23491	0.05987-0.9217	0.04	0.67224	0.46031-0.98173	0.432	0.89389	0.67581-1.18236	0.288	0.6095	0.25010-1.48536	0.271	0.60521	0.25298-1.44786	0.17936	0.06371	0.783	16.7418	22	0.77745	12.9098	21	0.91175
ebi-a-GCST90027741.csv	23	0.051	0.23501	0.05979-0.9237	0.046	0.67246	0.45522-0.99337	0.433	0.89406	0.67595-1.18255	0.227	0.60929	0.27897-1.33076	0.251	0.605	0.26254-1.39419	0.17934	0.06407	0.76	16.7438	22	0.77734	12.9233	21	0.91129
ebi-a-GCST90027516.csv	28	0.018	37.9813	2.27573-633.8989	0.367	1.2169	0.79454-1.86376	0.438	1.13068	0.82920-1.54177	0.117	2.4937	0.82635-7.52532	0.137	2.47111	0.77809-7.84795	-0.33993	0.02082	0.355	29.3597	27	0.34368	23.304	26	0.6157
ebi-a-GCST90027789.csv	57	0.04	2.1551	1.05315-4.4101	0.817	1.02415	0.83720-1.25285	0.438	1.05825	0.91723-1.22094	0.935	1.0181	0.66141-1.56713	0.938	1.0181	0.64923-1.59655	-0.08957	0.05194	0.847	45.0454	56	0.85254	41.098	55	0.91806
ebi-a-GCST90027491.csv	39	0	18.0557	6.76091-48.2198	0.234	1.272	0.85562-1.89101	0.462	1.13368	0.81127-1.58423	0.272	2.1357	0.56248-8.10917	0.262	2.16088	0.57344-8.14273	-0.27864	0	0.005	68.7568	38	0.00164	36.1631	37	0.50809
ebi-a-GCST90027682.csv	63	0.135	0.42011	0.13681-1.2900	0.84	1.02735	0.79121-1.33395	0.481	1.07309	0.88192-1.30570	0.495	1.22753	0.68352-2.20452	0.506	1.2183	0.68317-2.17261	0.08045	0.10124	1	21.0667	62	1	18.2977	61	1
ebi-a-GCST90027503.csv	51	0.955	0.97244	0.36700-2.5767	0.023	1.43331	1.05157-1.95364	0.484	1.08313	0.86609-1.35458	0.176	1.58572	0.82145-3.06106	0.181	1.57111	0.81840-3.01609	0.01092	0.82453	0.393	51.5207	50	0.41406	51.4685	49	0.37736
ebi-a-GCST90027545.csv	45	0.003	7.81923	2.13549-28.6306	0.978	1.0046	0.72740-1.38744	0.485	0.91809	0.72223-1.16707	0.082	0.5201	0.25303-1.06910	0.089	0.5201	0.24904-1.08621	-0.18811	0.002	0.997	20.3816	44	0.99911	9.54732	43	1
ebi-a-GCST90027513.csv	61	0.027	2.58659	1.13684-5.8851	0.011	1.45139	1.08798-1.93620	0.487	1.07467	0.87723-1.31655	0.093	1.96301	0.90429-4.26121	0.119	1.86243	0.86246-4.02179	-0.09115	0.03477	0.659	53.9919	60	0.69374	49.322	59	0.81128
ebi-a-GCST90027782.csv	30	0.266	0.77137	0.49247-1.2082	0.613	1.04109	0.89070-1.21686	0.495	1.04129	0.92717-1.16945	0.865	1.027	0.75793-1.39160	0.848	1.03006	0.76224-1.39198	0.07595	0.18571	0.988	15.2067	29	0.98334	13.366	28	0.99111
ebi-a-GCST90027524.csv	28	0.058	0.37816	0.14483-0.9874	0.185	0.77584	0.53305-1.12921	0.503	0.90961	0.68927-1.20038	0.369	0.73853	0.38567-1.41422	0.351	0.76325	0.43690-1.33339	0.10429	0.07245	0.726	22.7287	27	0.6995	19.2232	26	0.82687
ebi-a-GCST90027695.csv	23	0.05	0.26847	0.07779-0.9266	0.119	0.6971	0.44290-1.09720	0.504	0.89722	0.65294-1.23289	0.281	0.59259	0.23440-1.49815	0.277	0.59831	0.24263-1.47537	0.15165	0.06227	0.372	24.0983	22	0.3421	20.2208	21	0.50732
ebi-a-GCST90027851.csv	11	0.781	1.18333	0.37317-3.7524	0.595	1.06588	0.84223-1.34892	0.51	1.06323	0.88602-1.27590	0.845	1.03753	0.72470-1.48541	0.808	1.04709	0.72937-1.50319	-0.0245	0.85805	0.926	4.56446	10	0.91831	4.53058	9	0.87316
ebi-a-GCST90027512.csv	24	0.446	1.78251	0.41362-7.6818	0.455	1.16825	0.77684-1.75688	0.512	0.90878	0.68283-1.20948	0.086	0.46023	0.19704-1.07497	0.384	1.46993	0.62819-3.43956	-0.06558	0.36669	0.701	19.1579	23	0.69202	18.3084	22	0.68755
ebi-a-GCST90027653.csv	97	0.705	1.11928	0.62519-2.0038	0.002	0.77801	0.66171-0.91474	0.512	0.96122	0.85396-1.08196	0.135	0.72931	0.48391-1.09916	0.139	0.73323	0.48770-1.10237	-0.02121	0.60201	0.998	59.9755	96	0.99852	59.7017	95	0.99826
ebi-a-GCST90027543.csv	24	0.003	11.5914	2.69581-49.8402	0.418	0.84538	0.56322-1.26890	0.523	0.91064	0.68340-1.21343	0.706	0.86281	0.40450-1.84038	0.759	0.89054	0.42801-1.85290	-0.27397	0.00209	0.613	20.4856	23	0.61247	8.32899	22	0.99618
ebi-a-GCST90027716.csv	36	0.001	19.8926	3.96628-99.7704	0.022	0.64917	0.44826-0.94013	0.524	0.91659	0.70139-1.19783	0.136	0.51182	0.21669-1.20892	0.096	0.51182	0.23736-1.10364	-0.25791	0.00058	0.929	23.749	35	0.92531	9.36072	34	0.99999
ebi-a-GCST90027759.csv	29	0.792	1.22707	0.27203-5.5350	0.109	1.37769	0.93140-2.03781	0.524	1.09144	0.83394-1.42846	0.132	2.0004	0.83326-4.80238	0.139	2.0004	0.81974-4.88159	-0.01276	0.87807	0.701	23.487	28	0.7083	23.463	27	0.65991
ebi-a-GCST90027799.csv	38	0.222	0.35832	0.07089-1.8112	0.073	0.76744	0.57473-1.02478	0.532	1.06827	0.86826-1.31435	0.302	0.71734	0.38492-1.33683	0.332	0.71734	0.36977-1.39160	0.14903	0.19113	0.99	19.2297	37	0.993	17.4547	36	0.99608
ebi-a-GCST90027554.csv	33	0.069	0.2863	0.07779-1.0536	0.009	1.64308	1.13257-2.38368	0.538	1.089	0.82995-1.42891	0.125	1.79542	0.86618-3.72154	0.107	1.79542	0.89842-3.58800	0.12301	0.04841	0.726	26.813	32	0.72659	22.5906	31	0.86359
ebi-a-GCST90027739.csv	100	0.971	0.98503	0.44271-2.1917	0.028	0.84755	0.73160-0.98187	0.538	0.96489	0.86124-1.08102	0.164	0.7455	0.49462-1.12363	0.127	0.7455	0.51279-1.08381	-0.00314	0.95932	1	42.3106	99	1	42.3079	98	1
ebi-a-GCST90027451.csv	20	0.06	0.10926	0.01254-0.9519	0.468	1.19292	0.74072-1.92118	0.542	1.11671	0.78321-1.59221	0.707	1.18273	0.49991-2.79817	0.685	1.18273	0.53172-2.63079	0.21296	0.04701	0.436	19.7655	19	0.40881	15.2188	18	0.64689
ebi-a-GCST90027527.csv	81	0	10.0704	3.84682-26.3629	0.131	1.19966	0.94709-1.51958	0.546	0.94694	0.79346-1.13012	0.389	1.27332	0.73732-2.19897	0.349	1.27332	0.76993-2.10585	-0.24547	1e-05	0.994	52.2897	80	0.993	28.296	79	1
ebi-a-GCST90027499.csv	20	0.416	1.53465	0.56045-4.2023	0.725	0.93958	0.66363-1.33028	0.563	1.07418	0.84310-1.36859	0.442	0.77406	0.40820-1.46784	0.458	0.78332	0.41671-1.47243	-0.0524	0.4837	0.777	14.5533	19	0.75053	14.0419	18	0.72635
ebi-a-GCST90027666.csv	70	0.089	0.39096	0.13461-1.1355	0.578	0.92515	0.70327-1.21704	0.572	0.94468	0.77535-1.15098	0.588	0.83492	0.43568-1.60000	0.697	1.1311	0.61062-2.09523	0.0904	0.10349	0.998	39.2904	69	0.99849	36.5668	68	0.99936
ebi-a-GCST90027676.csv	21	0.942	1.07768	0.14629-7.9390	0.286	0.77967	0.49356-1.23165	0.576	0.9056	0.63968-1.28206	0.499	0.75358	0.33668-1.68668	0.538	0.75358	0.31093-1.82638	-0.01614	0.86418	0.99	7.88434	20	0.99261	7.85428	19	0.98808
ebi-a-GCST90027568.csv	28	0.053	8.01902	1.07525-59.8044	0.371	0.82206	0.53527-1.26249	0.579	1.09034	0.80313-1.48026	0.482	0.73101	0.30908-1.72892	0.457	0.73719	0.33407-1.62678	-0.18746	0.05968	0.439	27.1892	27	0.45362	23.3116	26	0.61527
ebi-a-GCST90027468.csv	17	0.918	0.92399	0.21102-4.0458	0.396	1.13577	0.84671-1.52352	0.604	1.05832	0.85450-1.31077	0.585	1.14672	0.70874-1.85534	0.545	1.14672	0.74304-1.76969	0.02058	0.85796	0.714	12.4878	16	0.70977	12.4547	15	0.64434
ebi-a-GCST90027694.csv	21	0.016	0.09022	0.01513-0.5381	0.771	0.9291	0.56628-1.52438	0.611	0.90493	0.61550-1.33046	0.772	0.87919	0.37231-2.07617	0.736	0.86363	0.37250-2.00228	0.20258	0.01843	0.147	26.4105	20	0.15268	19.5668	19	0.42105
ebi-a-GCST90027807.csv	27	0.29	1.76501	0.63065-4.9397	0.263	0.87168	0.68553-1.10838	0.614	0.95267	0.78896-1.15035	0.564	0.86977	0.54480-1.38859	0.538	0.86977	0.56121-1.34798	-0.09303	0.24345	1	6.90066	26	0.99993	5.47359	25	0.99999
ebi-a-GCST90027850.csv	8	0.978	1.01994	0.26557-3.9171	0.804	0.95109	0.64017-1.41303	0.615	0.91959	0.66331-1.27491	0.862	0.94967	0.54103-1.66697	0.859	0.94837	0.53933-1.66761	-0.01806	0.88152	1	0.36778	7	0.9998	0.3436	6	0.99926
ebi-a-GCST90027452.csv	50	0.013	0.40893	0.20666-0.8092	0.756	0.97347	0.82151-1.15354	0.622	1.03379	0.90574-1.17995	0.5	0.86366	0.56568-1.31862	0.469	0.86366	0.58246-1.28063	0.17581	0.00918	1	18.6527	49	0.99997	11.2818	48	1
ebi-a-GCST90027665.csv	20	0.017	0.08333	0.01314-0.5286	0.769	0.92956	0.57122-1.51269	0.624	0.90369	0.60308-1.35414	0.742	0.85351	0.33661-2.16417	0.725	0.8448	0.33444-2.13397	0.21128	0.019	0.128	26.4091	19	0.11919	19.2919	18	0.37406
ebi-a-GCST90027798.csv	36	0.829	0.92946	0.48188-1.7928	0.305	0.91775	0.77895-1.08127	0.624	0.97104	0.86345-1.09204	0.502	0.88115	0.61109-1.27055	0.491	0.88115	0.61703-1.25833	0.00838	0.8952	0.959	21.9937	35	0.95741	21.9761	34	0.94451
ebi-a-GCST90027556.csv	26	0.817	1.21507	0.23674-6.2364	0.936	1.01695	0.67447-1.53334	0.632	1.07777	0.79299-1.46482	0.748	0.87425	0.38798-1.96995	0.784	0.8936	0.40248-1.98397	-0.01303	0.88492	0.979	12.7934	25	0.97893	12.772	24	0.96973
ebi-a-GCST90027756.csv	12	0.486	0.71886	0.29408-1.7572	0.935	1.00937	0.80566-1.26460	0.633	0.95683	0.79815-1.14706	0.804	1.0508	0.71658-1.54090	0.816	1.04429	0.73084-1.49217	0.07394	0.53633	0.993	2.90544	11	0.99192	2.49536	10	0.99094
ebi-a-GCST90027697.csv	34	0.777	0.82963	0.22981-2.9950	0.955	1.0093	0.72977-1.39590	0.635	1.06322	0.82527-1.36977	0.922	1.03144	0.55887-1.90363	0.927	1.03144	0.53688-1.98157	0.0224	0.70179	1	8.27757	33	1	8.1283	32	0.99999
ebi-a-GCST90027608.csv	26	0.913	0.88604	0.10375-7.5671	0.952	0.98784	0.66554-1.46622	0.636	0.9302	0.68932-1.25524	0.804	1.08608	0.56892-2.07335	0.795	1.09512	0.55547-2.15905	0.00403	0.96457	0.937	15.4237	25	0.93091	15.4217	24	0.90781
ebi-a-GCST90027780.csv	40	0.713	1.39843	0.23784-8.2223	0.845	1.03703	0.72001-1.49361	0.637	1.0758	0.79408-1.45747	0.457	0.71892	0.30375-1.70150	0.471	0.71892	0.29560-1.74844	-0.02778	0.76986	0.026	58.2038	39	0.02458	58.0711	38	0.01957
ebi-a-GCST90027848.csv	90	0.94	1.01174	0.74751-1.3694	0.002	0.81958	0.72310-0.92894	0.64	0.97926	0.89692-1.06916	0.078	0.77503	0.58568-1.02560	0.075	0.7815	0.59763-1.02193	-0.00632	0.82571	0.382	91.8057	89	0.39821	91.7548	88	0.371
ebi-a-GCST90027692.csv	10	0.39	1.52102	0.61532-3.7598	0.477	1.0907	0.85852-1.38568	0.643	0.95649	0.79270-1.15414	0.535	1.13025	0.77912-1.63963	0.536	1.1323	0.77544-1.65340	-0.11896	0.33448	0.879	4.84364	9	0.84772	3.78896	8	0.87564
ebi-a-GCST90027765.csv	44	0.008	0.23842	0.08661-0.6563	0.965	1.00632	0.75751-1.33686	0.644	0.95241	0.77472-1.17086	0.95	1.01885	0.56807-1.82734	0.948	1.01885	0.58219-1.78302	0.13417	0.00902	0.963	27.8198	43	0.96472	20.3219	42	0.99809
ebi-a-GCST90027761.csv	10	0.389	1.51332	0.62012-3.6931	0.458	1.09178	0.86597-1.37649	0.645	0.95683	0.79307-1.15441	0.549	1.1315	0.76726-1.66867	0.57	1.1315	0.74997-1.70714	-0.11772	0.33304	0.866	4.8468	9	0.84745	3.78544	8	0.87594
ebi-a-GCST90027813.csv	17	0.114	6.2257	0.73793-52.5247	0.223	0.73139	0.44215-1.20985	0.649	0.91775	0.63443-1.32760	0.274	0.59236	0.23918-1.46704	0.276	0.59748	0.24424-1.46160	-0.17352	0.09423	0.786	11.3364	16	0.78826	8.14466	15	0.91785
ebi-a-GCST90027717.csv	36	0.802	0.91906	0.47708-1.7705	0.323	0.92468	0.79163-1.08009	0.664	0.97436	0.86659-1.09553	0.513	0.88633	0.61963-1.26782	0.502	0.88633	0.62552-1.25588	0.01115	0.86017	0.956	21.9234	35	0.95845	21.8919	34	0.94603
ebi-a-GCST90027473.csv	36	0.747	1.19454	0.40877-3.4908	0.459	0.88463	0.63944-1.22382	0.665	0.94613	0.73634-1.21568	0.693	0.87987	0.46849-1.65248	0.689	0.87987	0.47255-1.63831	-0.0215	0.66397	1	3.86569	35	1	3.67362	34	1
ebi-a-GCST90027644.csv	33	0.403	1.48967	0.59254-3.7451	0.32	1.20175	0.83688-1.72569	0.671	1.06307	0.80155-1.40991	0.682	1.15219	0.58813-2.25723	0.696	1.15219	0.56958-2.33078	-0.03882	0.45681	1	8.99611	32	0.99998	8.42827	31	0.99998
ebi-a-GCST90027566.csv	23	0.985	1.01109	0.32465-3.1490	0.861	1.04066	0.66712-1.62333	0.686	1.06917	0.77309-1.47864	0.881	1.05975	0.49937-2.24897	0.95	1.02726	0.45112-2.33920	0.00564	0.92087	0.998	8.31579	22	0.99622	8.30569	21	0.99371
ebi-a-GCST90027786.csv	29	0.666	0.85819	0.43162-1.7063	0.065	1.1833	0.98991-1.41447	0.703	1.02719	0.89503-1.17885	0.28	1.2215	0.85544-1.74420	0.283	1.21018	0.86017-1.70263	0.03936	0.60488	0.194	34.095	28	0.19776	33.7524	27	0.17336
ebi-a-GCST90027537.csv	10	0.536	0.4058	0.02632-6.2557	0.595	0.85535	0.48113-1.52064	0.716	0.91713	0.57574-1.46093	0.573	0.77238	0.32507-1.83521	0.562	0.76768	0.32487-1.81404	0.0749	0.56962	1	1.08391	9	0.99922	0.73237	8	0.99944
ebi-a-GCST90027797.csv	40	0.001	18.5242	3.73426-91.8916	0.891	0.97596	0.68798-1.38447	0.718	0.95451	0.74136-1.22895	0.126	0.5253	0.23429-1.17779	0.139	0.5253	0.22790-1.21081	-0.24852	0.00073	0.955	25.1733	39	0.95762	11.6641	38	0.99999
ebi-a-GCST90027540.csv	64	0.033	3.35072	1.12785-9.9547	0.239	0.84626	0.64091-1.11742	0.722	0.96495	0.79290-1.17434	0.503	0.82518	0.47165-1.44371	0.517	0.82518	0.46267-1.47174	-0.11502	0.02618	0.876	50.3843	63	0.87464	45.1944	62	0.94639
ebi-a-GCST90027533.csv	79	0.467	1.53198	0.48856-4.8039	0.656	0.94656	0.74315-1.20564	0.727	0.96847	0.80926-1.15900	0.832	0.93565	0.50769-1.72435	0.826	0.93565	0.51791-1.69033	-0.03816	0.42825	1	40.6654	78	0.99985	40.0311	77	0.99984
ebi-a-GCST90027762.csv	20	0.014	0.07564	0.01177-0.4861	0.784	0.93308	0.56876-1.53078	0.729	0.9305	0.61872-1.39939	0.883	0.92876	0.35183-2.45176	0.836	0.90722	0.36497-2.25515	0.22314	0.01487	0.092	27.0842	19	0.10271	19.3053	18	0.37326
ebi-a-GCST90027800.csv	19	0.549	1.53197	0.39097-6.0029	0.391	1.14168	0.84325-1.54572	0.732	1.04108	0.82668-1.31110	0.571	1.16753	0.68956-1.97680	0.598	1.16753	0.66333-2.05498	-0.07898	0.58113	0.992	6.26012	18	0.99502	5.94374	17	0.99356
ebi-a-GCST90027685.csv	11	0.184	0.19273	0.02044-1.8169	0.938	0.9856	0.68534-1.41740	0.735	1.04988	0.79175-1.39217	0.96	0.98617	0.58094-1.67406	0.961	0.98617	0.57198-1.70029	0.35908	0.16971	0.99	2.7785	10	0.98617	0.55023	9	0.99995
ebi-a-GCST90027746.csv	11	0.184	0.19259	0.02043-1.8155	0.938	0.9856	0.68210-1.42413	0.735	1.04987	0.79175-1.39213	0.959	0.98621	0.59032-1.64759	0.961	0.98621	0.56999-1.70635	0.35924	0.16955	0.988	2.77855	10	0.98617	0.54842	9	0.99995
ebi-a-GCST90027541.csv	71	0.309	0.60038	0.22646-1.5917	0.003	0.65406	0.49584-0.86278	0.738	1.0323	0.85672-1.24385	0.165	0.60649	0.30150-1.22002	0.129	0.60649	0.32069-1.14700	0.04752	0.27088	0.455	70.76	70	0.45211	69.5187	69	0.45985
ebi-a-GCST90027854.csv	29	0.528	0.54675	0.08585-3.4820	0.553	0.90136	0.63943-1.27058	0.745	0.95684	0.73355-1.24811	0.641	0.86691	0.47912-1.56856	0.685	0.87036	0.44800-1.69093	0.05557	0.55437	1	4.44282	28	1	4.0844	27	1
ebi-a-GCST90027611.csv	23	0.772	1.22051	0.32312-4.6101	0.593	1.1417	0.70214-1.85645	0.756	0.94065	0.63986-1.38283	0.137	0.39001	0.11799-1.28914	0.155	0.39001	0.11153-1.36382	-0.02489	0.69168	0.132	29.8618	22	0.12186	29.6336	21	0.0996
ebi-a-GCST90027691.csv	15	0.651	0.83036	0.37775-1.8253	0.214	0.83807	0.63432-1.10728	0.76	0.96754	0.78291-1.19571	0.386	0.82853	0.54852-1.25149	0.432	0.83037	0.52908-1.30324	0.02867	0.69924	0.962	6.18939	14	0.96149	6.03336	13	0.94493
ebi-a-GCST90027528.csv	17	0.858	0.82565	0.10550-6.4618	0.481	1.19059	0.73304-1.93374	0.766	1.0601	0.72213-1.55624	0.689	1.1925	0.51069-2.78455	0.694	1.1925	0.50389-2.82214	0.02246	0.81178	0.997	4.19395	16	0.99853	4.13521	15	0.99726
ebi-a-GCST90027627.csv	15	0.142	44.6605	0.37971-5252.8083	0.015	0.51038	0.29632-0.87909	0.774	0.91961	0.51920-1.62883	0.083	0.48495	0.22699-1.03608	0.079	0.48495	0.22954-1.02457	-0.48544	0.13211	0.009	30.1997	14	0.00716	25.196	13	0.02175
ebi-a-GCST90027601.csv	13	0.918	0.93074	0.24508-3.5347	0.67	0.90906	0.58659-1.40879	0.775	1.05219	0.74215-1.49175	0.73	0.87959	0.43144-1.79325	0.749	0.88753	0.43489-1.81127	0.01887	0.85533	0.982	4.01532	12	0.98316	3.98048	11	0.97048
ebi-a-GCST90027836.csv	34	0.125	1.95181	0.84968-4.4835	0.199	1.22058	0.90046-1.65449	0.779	1.0331	0.82293-1.29695	0.392	1.26969	0.74026-2.17778	0.399	1.26969	0.73439-2.19518	-0.09366	0.12888	0.998	12.7201	33	0.99944	10.2903	32	0.9999
ebi-a-GCST90027649.csv	50	0.109	0.28214	0.06177-1.2887	0.641	1.06852	0.80898-1.41132	0.783	1.03137	0.82772-1.28514	0.799	1.07306	0.62515-1.84188	0.813	1.07306	0.59994-1.91929	0.12546	0.09743	1	6.70409	49	1	3.84655	48	1
ebi-a-GCST90027818.csv	25	0.216	0.33128	0.06047-1.8149	0.652	0.9464	0.74470-1.20273	0.783	1.02519	0.85900-1.22352	0.798	0.94757	0.62963-1.42606	0.633	0.90791	0.61352-1.34357	0.22922	0.20349	0.964	12.9075	24	0.96762	11.1943	23	0.98112
ebi-a-GCST90027794.csv	16	0.52	0.55087	0.09362-3.2413	0.628	1.13331	0.68348-1.87922	0.784	1.06269	0.68755-1.64250	0.687	1.19913	0.50486-2.84813	0.65	1.21166	0.53767-2.73053	0.0669	0.46545	0.09	22.6419	15	0.09205	21.7664	14	0.08354
ebi-a-GCST90027680.csv	36	0.974	1.01685	0.37624-2.7482	0.105	1.20372	0.96186-1.50639	0.788	0.97705	0.82474-1.15748	0.331	1.3084	0.76649-2.23346	0.273	1.314	0.81246-2.12517	-0.00615	0.93681	0.966	21.5331	35	0.96386	21.5267	34	0.95229
ebi-a-GCST90027725.csv	36	0.976	1.01555	0.37521-2.7487	0.113	1.20427	0.95694-1.51551	0.788	0.977	0.82461-1.15754	0.316	1.30876	0.77924-2.19811	0.336	1.31436	0.75854-2.27746	-0.00595	0.93884	0.962	21.5329	35	0.96386	21.5269	34	0.95229
ebi-a-GCST90027809.csv	36	0.936	1.04202	0.38621-2.8115	0.111	1.20534	0.95792-1.51667	0.795	0.97773	0.82514-1.15852	0.314	1.3109	0.77965-2.20415	0.311	1.31651	0.77897-2.22500	-0.00979	0.89918	0.968	21.5375	35	0.9638	21.5212	34	0.95239
ebi-a-GCST90027466.csv	13	0.379	1.99392	0.45574-8.7237	0.5	0.83186	0.48697-1.42100	0.802	0.94743	0.62084-1.44583	0.367	0.63105	0.24079-1.65384	0.401	0.63938	0.23380-1.74851	-0.07411	0.32453	0.85	7.04586	12	0.85457	5.9822	11	0.87455
ebi-a-GCST90027506.csv	89	0.004	5.70106	1.80890-17.9679	0.92	1.01129	0.81277-1.25830	0.803	1.02178	0.86289-1.20993	0.736	1.08989	0.66167-1.79525	0.737	1.08989	0.66098-1.79712	-0.17225	0.00388	1	38.6449	88	1	29.8385	87	1
ebi-a-GCST90027632.csv	14	0.089	5.21011	0.90668-29.9392	0.831	0.95068	0.59697-1.51397	0.819	0.96042	0.67894-1.35860	0.242	0.57111	0.23298-1.39997	0.257	0.58005	0.23593-1.42611	-0.19688	0.07758	0.36	14.404	13	0.34602	10.679	12	0.55661
ebi-a-GCST90027642.csv	124	0.148	1.89346	0.80167-4.4721	0.275	0.89692	0.73782-1.09032	0.831	0.98475	0.85524-1.13386	0.314	0.73769	0.40893-1.33077	0.375	0.7619	0.41856-1.38687	-0.0535	0.13327	1	76.3272	123	0.99969	74.0428	122	0.99981
ebi-a-GCST90027687.csv	47	0.001	0.26225	0.12662-0.5432	0.013	0.82881	0.71444-0.96149	0.831	0.98793	0.88398-1.10411	0.224	0.82727	0.61188-1.11848	0.223	0.82727	0.61245-1.11744	0.27949	0.00076	0.907	34.1022	46	0.9025	21.0506	45	0.99911
ebi-a-GCST90027483.csv	15	0.512	0.37428	0.02144-6.5332	0.122	0.64137	0.36518-1.12646	0.837	1.04645	0.67992-1.61054	0.331	0.60206	0.22440-1.61530	0.296	0.59777	0.23618-1.51295	0.08881	0.48836	0.301	16.4695	14	0.28555	15.8494	13	0.25736
ebi-a-GCST90027456.csv	5	0.932	1.14054	0.07198-18.0709	0.916	0.95981	0.44793-2.05666	0.849	0.94333	0.51720-1.72054	0.931	0.95804	0.38443-2.38755	0.975	0.98261	0.35711-2.70370	-0.02541	0.89899	0.88	1.22281	4	0.87433	1.20377	3	0.7521
ebi-a-GCST90027728.csv	10	0.032	7.65966	1.64621-35.6398	0.23	0.77466	0.51055-1.17541	0.872	0.97218	0.68938-1.37100	0.277	0.67168	0.34250-1.31725	0.272	0.67168	0.34471-1.30881	-0.29699	0.02747	0.307	10.3379	9	0.32383	3.09849	8	0.92803
ebi-a-GCST90027631.csv	33	0.001	0.08663	0.02195-0.3418	0.985	0.99629	0.66816-1.48556	0.877	1.02411	0.75757-1.38442	0.129	2.34943	0.80330-6.87139	0.119	2.34943	0.82570-6.68497	0.2472	0.0011	0.239	38.5127	32	0.19857	25.5563	31	0.7423
ebi-a-GCST90027447.csv	29	0.506	1.37667	0.54302-3.4902	0.79	0.95089	0.65635-1.37762	0.91	0.98361	0.73777-1.31136	0.575	0.81239	0.39642-1.66483	0.622	0.82534	0.38779-1.75655	-0.03423	0.46282	1	6.96036	28	0.99998	6.40563	27	0.99998
ebi-a-GCST90027518.csv	13	0.164	4.02645	0.64445-25.1570	0.919	0.96946	0.53280-1.76400	0.912	1.02626	0.64914-1.62248	0.957	0.97191	0.34949-2.70283	0.997	1.0017	0.38290-2.62057	-0.12783	0.16037	0.306	13.912	12	0.30636	11.5354	11	0.39956
ebi-a-GCST90027825.csv	18	0.953	1.02341	0.47831-2.1897	0.634	0.93198	0.69745-1.24537	0.918	0.98854	0.79464-1.22975	0.553	0.85289	0.50931-1.42824	0.554	0.86664	0.54440-1.37963	-0.00556	0.92686	0.981	7.45079	17	0.97693	7.44209	16	0.96377
ebi-a-GCST90027622.csv	72	0.054	0.44336	0.19682-0.9987	0.48	0.92311	0.73918-1.15280	0.92	1.00872	0.85118-1.19541	0.305	0.77536	0.47846-1.25650	0.358	0.78664	0.47335-1.30727	0.11031	0.04628	1	31.0153	71	0.99999	26.899	70	1
ebi-a-GCST90027643.csv	4	0.312	0	0.00000-365.8175	0.921	1.04546	0.43210-2.52949	0.925	0.96433	0.45396-2.04847	0.599	1.47569	0.40088-5.43218	0.628	1.43572	0.38410-5.36652	1.04094	0.31227	0.629	1.79693	3	0.6156	0.00206	2	0.99897
ebi-a-GCST90027585.csv	30	0.033	0.17146	0.03683-0.7982	0.551	1.11215	0.78450-1.57665	0.926	0.98716	0.75048-1.29849	0.675	1.15575	0.59099-2.26021	0.687	1.1438	0.59887-2.18457	0.21231	0.0313	1	9.24942	29	0.99982	4.11002	28	1
ebi-a-GCST90027523.csv	7	0.369	2.81388	0.36000-21.9939	0.969	0.99015	0.60551-1.61911	0.932	1.02047	0.63964-1.62804	0.942	1.0269	0.51987-2.02844	0.934	1.0269	0.56334-1.87194	-0.16459	0.36636	0.144	10.419	6	0.10808	8.70313	5	0.12151
ebi-a-GCST90027613.csv	39	0.374	0.5869	0.18391-1.8730	0.881	1.02645	0.72863-1.44602	0.934	1.01067	0.78657-1.29863	0.684	1.1936	0.51184-2.78343	0.716	1.16226	0.52050-2.59530	0.05131	0.35321	0.871	28.5143	38	0.86786	27.6303	37	0.86829
ebi-a-GCST90027501.csv	44	0.363	1.8286	0.50489-6.6227	0.573	1.09887	0.79142-1.52576	0.937	1.00958	0.79637-1.27986	0.233	1.65707	0.73079-3.75744	0.162	1.73271	0.81211-3.69691	-0.05533	0.3626	0.822	34.0725	43	0.83284	33.2253	42	0.83133
ebi-a-GCST90027723.csv	37	0.1	2.54821	0.86182-7.5345	0.208	0.8755	0.71185-1.07677	0.944	0.99429	0.84677-1.16751	0.493	0.86722	0.57962-1.29754	0.504	0.86483	0.56755-1.31782	-0.14148	0.09418	1	12.9211	36	0.99986	9.96109	35	0.99999
ebi-a-GCST90027743.csv	82	0.328	0.64866	0.27393-1.5360	0.602	1.06375	0.84348-1.34154	0.945	1.0062	0.84359-1.20016	0.581	1.17002	0.67133-2.03916	0.574	1.1633	0.68755-1.96826	0.03941	0.31093	1	26.1875	81	1	25.1477	80	1
ebi-a-GCST90027855.csv	71	0.333	0.71512	0.36437-1.4035	0.003	1.41736	1.13025-1.77741	0.946	1.00561	0.85641-1.18079	0.177	1.44632	0.85066-2.45906	0.199	1.45158	0.82617-2.55044	0.03567	0.31115	0.999	39.2929	70	0.99889	38.2519	69	0.99902
ebi-a-GCST90027661.csv	45	0	0.17756	0.08190-0.3849	0.019	0.82943	0.70986-0.96913	0.951	1.00357	0.89628-1.12371	0.25	0.82948	0.60579-1.13577	0.199	0.82948	0.62642-1.09837	0.36965	6e-05	0.898	32.0954	44	0.90873	12.426	43	1
ebi-a-GCST90027558.csv	154	0.018	0.64091	0.44511-0.9228	0.002	0.80247	0.69848-0.92195	0.954	1.00288	0.91049-1.10464	0.047	0.57885	0.33893-0.98861	0.042	0.58241	0.34754-0.97601	0.06595	0.01361	0.5	152.275	153	0.50134	146.043	152	0.62091
ebi-a-GCST90027777.csv	32	0.139	4.90025	0.63115-38.0453	0.244	0.81401	0.57579-1.15079	0.956	0.99229	0.75556-1.30320	0.529	0.80829	0.41963-1.55692	0.52	0.80829	0.42607-1.53340	-0.14929	0.13381	1	9.95569	31	0.99988	7.58108	30	0.99999
ebi-a-GCST90027573.csv	27	0.175	0.22863	0.02876-1.8176	0.205	1.36578	0.84337-2.21177	0.959	1.01117	0.65997-1.54926	0.062	2.48566	0.99649-6.20024	0.049	2.42636	1.04717-5.62204	0.15321	0.16365	0.007	46.758	26	0.0075	43.1991	25	0.01331
ebi-a-GCST90027657.csv	79	0.313	0.63073	0.25915-1.5351	0.637	1.05991	0.83261-1.34926	0.976	0.99723	0.83360-1.19298	0.554	1.18246	0.68017-2.05568	0.567	1.18246	0.66769-2.09413	0.041	0.30596	1	25.3579	78	1	24.2958	77	1
ebi-a-GCST90027470.csv	46	0	1155.48	78.06225-17103.5765	0.007	0.62482	0.44303-0.88122	0.999	0.99982	0.78669-1.27070	0.151	0.52229	0.21862-1.24774	0.134	0.52229	0.22697-1.20187	-0.54791	1e-05	0.67	40.163	45	0.67666	13.6413	44	1
ebi-a-GCST90027792.csv	29	0.915	1.0658	0.33407-3.4003	0.692	0.95095	0.74174-1.21916	1	0.99996	0.81775-1.22277	0.775	0.93125	0.57444-1.50967	0.732	0.92513	0.59493-1.43861	-0.00792	0.9137	1	5.42215	28	1	5.41019	27	1
