# Supplementary material
Source: Frontiers journal article supplement (https://www.frontiersin.org/articles/1413183)
Supplement: Table_8.xlsx [file Table_8.xlsx]

## Sheet: Content
Table of Contents
S8.1 The IVs SNPs involved in gut microbiota phenotypes to abdominal aortic aneuryme (AAA) of FinnGen database.
S8.2 The IVs SNPs involved in gut microbiota phenotypes to AAA of UK Biobank database.
S8.3 The single SNP's effect estimated in gut microbiota phenotypes to AAA of FinnGen database.
S8.4 The single SNP's effect estimated in gut microbiota phenotypes to AAA of UK Biobank database.

## Sheet: S8.1
The IVs SNPs involved in gut microbiota phenotypes to abdominal aortic aneuryme (AAA) of FinnGen database.
id	SNP	effect_allele.exposure	other_allele.exposure	effect_allele.outcome	other_allele.outcome	beta.exposure	beta.outcome	eaf.exposure	eaf.outcome	remove	palindromic	ambiguous	pos.outcome	pval.outcome	se.outcome	pval_origin.outcome	data_source.outcome	chr.exposure	pos.exposure	se.exposure	pval.exposure	samplesize.exposure	mr_keep.exposure	pval_origin.exposure	data_source.exposure	R2	f	meanf
GCST90027446	rs11826488	A	G	A	G	0.153784	0.0185243	0.0763678	0.926292	FALSE	FALSE	FALSE	133199427	0.684641	0.0456108	reported	textfile	11	133069322	0.0345929	8.76718e-06	7738	TRUE	reported	textfile	0.00254749	19.7577	20.2592
	rs17194003	G	A	G	A	-0.102927	-0.0535143	0.201727	0.837066	FALSE	FALSE	FALSE	106003734	0.0957966	0.0321294	reported	textfile	3	105722581	0.021032	9.88917e-07	7738	TRUE	reported	textfile	0.00308551	23.9434	20.2592
	rs3744892	A	G	A	G	-0.0794805	-0.0199838	0.302527	0.783491	FALSE	FALSE	FALSE	59268713	0.485325	0.0286398	reported	textfile	18	56935945	0.0177453	7.50119e-06	7738	TRUE	reported	textfile	0.00258584	20.0559	20.2592
	rs45501496	G	A	G	A	-0.0791969	-0.0200528	0.302393	0.783485	FALSE	FALSE	FALSE	59268096	0.48379	0.0286379	reported	textfile	18	56935328	0.017778	8.39808e-06	7738	TRUE	reported	textfile	0.00255805	19.8398	20.2592
	rs58797899	A	G	A	G	-0.0791124	-0.020053	0.302302	0.783484	FALSE	FALSE	FALSE	59268087	0.483787	0.0286379	reported	textfile	18	56935319	0.0177777	8.58322e-06	7738	TRUE	reported	textfile	0.0025527	19.7982	20.2592
	rs62335789	C	G	C	G	-0.0977054	0.00198463	0.168684	0.137938	FALSE	TRUE	FALSE	180950371	0.95348	0.0340201	reported	textfile	4	181871524	0.021882	8.00276e-06	7738	TRUE	reported	textfile	0.0025699	19.932	20.2592
	rs6567073	C	T	C	T	-0.0780941	-0.0237385	0.303598	0.787144	FALSE	FALSE	FALSE	59256705	0.409684	0.0287931	reported	textfile	18	56923937	0.0175669	8.76759e-06	7738	TRUE	reported	textfile	0.00254747	19.7576	20.2592
	rs6567074	A	G	A	G	-0.0780941	-0.0240022	0.303598	0.787121	FALSE	FALSE	FALSE	59256718	0.404474	0.0287914	reported	textfile	18	56923950	0.0175669	8.76759e-06	7738	TRUE	reported	textfile	0.00254747	19.7576	20.2592
	rs7226481	C	T	C	T	-0.0805586	-0.0173369	0.302658	0.784	FALSE	FALSE	FALSE	59269163	0.545395	0.0286714	reported	textfile	18	56936395	0.0177678	5.78882e-06	7738	TRUE	reported	textfile	0.00264957	20.5515	20.2592
	rs7343057	G	A	G	A	-0.0785814	-0.0186762	0.304595	0.783323	FALSE	FALSE	FALSE	59266314	0.514142	0.0286269	reported	textfile	18	56933546	0.0175552	7.59679e-06	7738	TRUE	reported	textfile	0.00258271	20.0316	20.2592
	rs7635747	A	T	A	T	-0.103569	0.0549004	0.188442	0.161451	FALSE	TRUE	FALSE	106038264	0.0887401	0.0322549	reported	textfile	3	105757111	0.0218585	2.1565e-06	7738	TRUE	reported	textfile	0.00289289	22.4443	20.2592
	rs7937470	A	G	A	G	0.153389	0.0171802	0.0766262	0.925286	FALSE	FALSE	FALSE	133203496	0.705433	0.0454506	reported	textfile	11	133073391	0.0347071	9.891e-06	7738	TRUE	reported	textfile	0.00251784	19.5272	20.2592
	rs8090675	A	C	A	C	-0.0779161	-0.0231981	0.303536	0.786995	FALSE	FALSE	FALSE	59259591	0.42024	0.0287815	reported	textfile	18	56926823	0.0175682	9.20471e-06	7738	TRUE	reported	textfile	0.00253553	19.6647	20.2592
	rs8090682	G	C	G	C	-0.0784623	0.0231982	0.303239	0.213005	FALSE	TRUE	FALSE	59259598	0.420238	0.0287815	reported	textfile	18	56926830	0.0175786	8.06288e-06	7738	TRUE	reported	textfile	0.00256808	19.9178	20.2592
	rs8092093	C	G	C	G	-0.0780941	0.0239704	0.303598	0.212878	FALSE	TRUE	FALSE	59256505	0.405101	0.0287917	reported	textfile	18	56923737	0.0175669	8.76759e-06	7738	TRUE	reported	textfile	0.00254747	19.7576	20.2592
	rs8097288	A	T	A	T	-0.0778572	0.0241014	0.303731	0.212836	FALSE	TRUE	FALSE	59256439	0.402622	0.0287969	reported	textfile	18	56923671	0.017565	9.31451e-06	7738	TRUE	reported	textfile	0.00253263	19.6421	20.2592
	rs9947104	G	A	G	A	-0.0795727	-0.0202815	0.303897	0.783504	FALSE	FALSE	FALSE	59267126	0.478804	0.028637	reported	textfile	18	56934358	0.017523	5.5977e-06	7738	TRUE	reported	textfile	0.00265783	20.6157	20.2592
	rs9990334	A	G	A	G	0.0741908	0.00841591	0.424436	0.651662	FALSE	FALSE	FALSE	63512870	0.734275	0.0247932	reported	textfile	3	63498546	0.0167253	9.17128e-06	7738	TRUE	reported	textfile	0.00253642	19.6716	20.2592
GCST90027447	rs10118453	C	T	C	T	-0.169492	-0.0619438	0.0683979	0.936724	FALSE	FALSE	FALSE	27336665	0.209436	0.049353	reported	textfile	9	27336663	0.0376486	6.73364e-06	7738	TRUE	reported	textfile	0.00261238	20.2623	21.4754
	rs12647170	G	A	G	A	0.188783	-0.0301211	0.0765661	0.899656	FALSE	FALSE	FALSE	24503147	0.452271	0.0400743	reported	textfile	4	24504770	0.0373683	4.3728e-07	7738	TRUE	reported	textfile	0.00328746	25.5157	21.4754
	rs12704084	G	C	G	C	-0.0736196	0.0539003	0.599698	0.675316	FALSE	TRUE	FALSE	149217958	0.0324295	0.0251979	reported	textfile	7	148915050	0.0166029	9.24443e-06	7738	TRUE	reported	textfile	0.00253448	19.6565	21.4754
	rs12795612	G	A	G	A	0.126968	0.00514493	0.105994	0.918439	FALSE	FALSE	FALSE	96489563	0.905643	0.0434039	reported	textfile	11	96222727	0.026039	1.08208e-06	7738	TRUE	reported	textfile	0.00306322	23.7699	21.4754
	rs12881947	A	G	A	G	0.116509	0.00214349	0.895215	0.109788	FALSE	FALSE	FALSE	28610668	0.955074	0.0380485	reported	textfile	14	29079874	0.0261528	8.39189e-06	7738	TRUE	reported	textfile	0.00255824	19.8413	21.4754
	rs137982874	C	T	C	T	0.126984	0.00500223	0.105887	0.918438	FALSE	FALSE	FALSE	96489120	0.908218	0.0433897	reported	textfile	11	96222284	0.0260388	1.07875e-06	7738	TRUE	reported	textfile	0.00306404	23.7763	21.4754
	rs149404925	A	T	A	T	0.126938	-0.00569655	0.105884	0.0815601	FALSE	TRUE	FALSE	96490938	0.895667	0.0434397	reported	textfile	11	96224102	0.0260395	1.08921e-06	7738	TRUE	reported	textfile	0.00306166	23.7578	21.4754
	rs1526943	C	T	C	T	-0.073616	-0.0306784	0.426773	0.52708	FALSE	FALSE	FALSE	135315906	0.191895	0.0235085	reported	textfile	3	135034748	0.0162789	6.12068e-06	7738	TRUE	reported	textfile	0.00263584	20.4448	21.4754
	rs1596707	C	T	C	T	-0.0736145	-0.0247771	0.4218	0.529629	FALSE	FALSE	FALSE	135281046	0.292206	0.0235234	reported	textfile	3	134999888	0.0164381	7.52471e-06	7738	TRUE	reported	textfile	0.00258506	20.0499	21.4754
	rs2044363	A	C	A	C	-0.0733918	-0.0301833	0.426552	0.527352	FALSE	FALSE	FALSE	135314128	0.199351	0.0235181	reported	textfile	3	135032970	0.0162805	6.54546e-06	7738	TRUE	reported	textfile	0.00261934	20.3164	21.4754
	rs2650470	G	A	G	A	0.0739823	0.0308056	0.45345	0.527549	FALSE	FALSE	FALSE	84305918	0.190783	0.0235469	reported	textfile	5	83601736	0.0166039	8.36084e-06	7738	TRUE	reported	textfile	0.00255914	19.8483	21.4754
	rs35195925	C	T	C	T	0.129285	0.00221946	0.104754	0.918288	FALSE	FALSE	FALSE	96476671	0.959097	0.0432755	reported	textfile	11	96209835	0.0262543	8.46486e-07	7738	TRUE	reported	textfile	0.00312398	24.2428	21.4754
	rs35678456	G	A	G	A	0.129053	0.00239524	0.104872	0.918292	FALSE	FALSE	FALSE	96479971	0.955861	0.0432759	reported	textfile	11	96213135	0.0262101	8.48887e-07	7738	TRUE	reported	textfile	0.00312328	24.2374	21.4754
	rs35731059	A	C	A	C	0.129356	0.00198721	0.104757	0.91827	FALSE	FALSE	FALSE	96472841	0.963372	0.0432731	reported	textfile	11	96206005	0.0262545	8.35026e-07	7738	TRUE	reported	textfile	0.00312735	24.2691	21.4754
	rs36084825	C	T	C	T	0.129053	0.00238857	0.104872	0.918292	FALSE	FALSE	FALSE	96480137	0.955984	0.0432759	reported	textfile	11	96213301	0.0262101	8.48887e-07	7738	TRUE	reported	textfile	0.00312328	24.2374	21.4754
	rs4271939	C	T	C	T	-0.0725301	-0.0267547	0.426497	0.525043	FALSE	FALSE	FALSE	135322613	0.255691	0.0235385	reported	textfile	3	135041455	0.0163327	8.96334e-06	7738	TRUE	reported	textfile	0.00254206	19.7155	21.4754
	rs4878061	A	G	A	G	0.0715232	-0.0124455	0.49615	0.464396	FALSE	FALSE	FALSE	87344686	0.599387	0.023693	reported	textfile	9	89959601	0.0161566	9.56071e-06	7738	TRUE	reported	textfile	0.00252619	19.5921	21.4754
	rs4878062	G	A	G	A	0.0760825	-0.0248954	0.402286	0.541958	FALSE	FALSE	FALSE	87344749	0.294019	0.0237248	reported	textfile	9	89959664	0.0164219	3.60421e-06	7738	TRUE	reported	textfile	0.00276625	21.459	21.4754
	rs4894251	A	T	A	T	-0.0738069	0.027223	0.423355	0.471585	FALSE	TRUE	TRUE	135304381	0.24705	0.0235179	reported	textfile	3	135023223	0.016298	5.93827e-06	7738	TRUE	reported	textfile	0.0026433	20.5028	21.4754
	rs4894277	A	G	A	G	-0.0737386	-0.0271007	0.423301	0.528402	FALSE	FALSE	FALSE	135306370	0.249171	0.0235175	reported	textfile	3	135025212	0.0162512	5.69456e-06	7738	TRUE	reported	textfile	0.0026536	20.5829	21.4754
	rs58235446	T	C	T	C	-0.153253	0.0957405	0.0638651	0.95947	FALSE	FALSE	FALSE	91088257	0.104846	0.0590335	reported	textfile	9	93850539	0.033084	3.61743e-06	7738	TRUE	reported	textfile	0.00276535	21.4521	21.4754
	rs605262	A	G	A	G	-0.0757354	0.0348439	0.676757	0.402549	FALSE	FALSE	FALSE	87256479	0.149037	0.0241478	reported	textfile	11	86967521	0.0170586	9.00762e-06	7738	TRUE	reported	textfile	0.00254084	19.706	21.4754
	rs62271914	A	G	A	G	-0.0740607	-0.0272198	0.42331	0.528413	FALSE	FALSE	FALSE	135305046	0.247106	0.0235179	reported	textfile	3	135023888	0.0162991	5.52357e-06	7738	TRUE	reported	textfile	0.00266111	20.6413	21.4754
	rs67721361	C	T	C	T	0.128833	0.00221121	0.10467	0.918288	FALSE	FALSE	FALSE	96476302	0.959249	0.0432754	reported	textfile	11	96209466	0.0262638	9.32717e-07	7738	TRUE	reported	textfile	0.0031	24.0562	21.4754
	rs7041639	G	A	G	A	-0.157604	-0.0462386	0.0875309	0.927065	FALSE	FALSE	FALSE	27341340	0.316874	0.0461968	reported	textfile	9	27341338	0.0341699	3.98107e-06	7738	TRUE	reported	textfile	0.00274174	21.2684	21.4754
	rs72666075	C	T	C	T	-0.151693	0.0161859	0.0593823	0.946292	FALSE	FALSE	FALSE	28559936	0.759298	0.0528256	reported	textfile	14	29029142	0.0337842	7.12049e-06	7738	TRUE	reported	textfile	0.00259863	20.1554	21.4754
	rs731213	C	T	C	T	-0.073402	-0.0270754	0.422993	0.528234	FALSE	FALSE	FALSE	135310928	0.249651	0.0235193	reported	textfile	3	135029770	0.0162528	6.29419e-06	7738	TRUE	reported	textfile	0.00262898	20.3914	21.4754
	rs750543	A	G	A	G	-0.0723719	-0.030138	0.426612	0.527402	FALSE	FALSE	FALSE	135307634	0.199988	0.0235162	reported	textfile	3	135026476	0.0162467	8.4064e-06	7738	TRUE	reported	textfile	0.00255781	19.838	21.4754
	rs78351682	G	A	G	A	0.105017	0.0305892	0.135759	0.917681	FALSE	FALSE	FALSE	24505200	0.483909	0.043697	reported	textfile	3	24546691	0.0233773	7.04742e-06	7738	TRUE	reported	textfile	0.00260118	20.1752	21.4754
	rs8101993	C	T	C	T	-0.100985	0.00891197	0.180021	0.832468	FALSE	FALSE	FALSE	30112626	0.778694	0.0317129	reported	textfile	19	30603533	0.0223014	5.94963e-06	7738	TRUE	reported	textfile	0.00264284	20.4992	21.4754
GCST90027448	rs62523849	C	T	C	T	0.406572	-0.012244	0.0675415	0.932126	FALSE	FALSE	FALSE	87469548	0.795694	0.0472882	reported	textfile	8	88481776	0.0900147	6.28029e-06	7738	TRUE	reported	textfile	0.00262952	20.3956	19.7582
	rs62526815	A	G	A	G	0.402698	-0.0044888	0.0665602	0.934436	FALSE	FALSE	FALSE	87364569	0.925407	0.0479441	reported	textfile	8	88376797	0.0910031	9.6394e-06	7738	TRUE	reported	textfile	0.00252418	19.5765	19.7582
	rs62526859	G	A	G	A	0.403037	-0.00461661	0.0664682	0.934345	FALSE	FALSE	FALSE	87381352	0.923295	0.0479479	reported	textfile	8	88393580	0.0911186	9.72434e-06	7738	TRUE	reported	textfile	0.00252203	19.5598	19.7582
	rs62528171	G	A	G	A	0.405221	-0.00448591	0.0664268	0.934433	FALSE	FALSE	FALSE	87396522	0.925455	0.0479441	reported	textfile	8	88408750	0.0907956	8.08202e-06	7738	TRUE	reported	textfile	0.00256749	19.9132	19.7582
	rs62528195	A	G	A	G	0.403454	-0.0048225	0.0657792	0.934261	FALSE	FALSE	FALSE	87426696	0.919871	0.0479389	reported	textfile	8	88438924	0.0910426	9.35837e-06	7738	TRUE	reported	textfile	0.00253145	19.633	19.7582
	rs62528198	G	A	G	A	0.40276	-0.00433511	0.0657305	0.934395	FALSE	FALSE	FALSE	87437557	0.927937	0.0479334	reported	textfile	8	88449785	0.0909708	9.5396e-06	7738	TRUE	reported	textfile	0.00252674	19.5964	19.7582
	rs79261339	G	A	G	A	0.403454	-0.00463078	0.0657792	0.934431	FALSE	FALSE	FALSE	87419692	0.923064	0.0479499	reported	textfile	8	88431920	0.0910426	9.35837e-06	7738	TRUE	reported	textfile	0.00253145	19.633	19.7582
GCST90027449	rs10503728	C	A	C	A	0.11798	-0.0509676	0.416443	0.633549	FALSE	FALSE	FALSE	23563489	0.0375319	0.0245044	reported	textfile	8	23421002	0.0259485	5.44979e-06	7738	TRUE	reported	textfile	0.00266443	20.6671	21.719
	rs10749478	T	C	T	C	0.125759	0.0114534	0.70604	0.274373	FALSE	FALSE	FALSE	84091116	0.665094	0.026458	reported	textfile	10	85850872	0.0284095	9.5715e-06	7738	TRUE	reported	textfile	0.00252594	19.5902	21.719
	rs11787365	C	T	C	T	0.115737	-0.00282771	0.377604	0.606733	FALSE	FALSE	FALSE	143967165	0.906762	0.024143	reported	textfile	8	145041333	0.026173	9.77913e-06	7738	TRUE	reported	textfile	0.00252065	19.549	21.719
	rs12430818	G	C	G	C	-0.209209	-0.0305497	0.0943353	0.117237	FALSE	TRUE	FALSE	67585185	0.403016	0.0365319	reported	textfile	13	68159317	0.044771	2.97016e-06	7738	TRUE	reported	textfile	0.00281394	21.8301	21.719
	rs12527356	C	T	C	T	-0.1653	-0.00440677	0.162803	0.749613	FALSE	FALSE	FALSE	80692159	0.87025	0.0269789	reported	textfile	6	81401876	0.0348325	2.07936e-06	7738	TRUE	reported	textfile	0.00290192	22.5146	21.719
	rs12618097	T	C	T	C	-0.13814	0.0268981	0.769735	0.205003	FALSE	FALSE	FALSE	154277218	0.356242	0.0291562	reported	textfile	2	155133731	0.0301882	4.74045e-06	7738	TRUE	reported	textfile	0.00269875	20.934	21.719
	rs1289633	A	C	A	C	-0.170198	-0.0110929	0.162377	0.755851	FALSE	FALSE	FALSE	80852341	0.683499	0.0272091	reported	textfile	6	81562058	0.0349956	1.15372e-06	7738	TRUE	reported	textfile	0.00304739	23.6467	21.719
	rs1315631	G	T	G	T	-0.167133	-0.0110153	0.147261	0.7558	FALSE	FALSE	FALSE	80851149	0.685545	0.0272045	reported	textfile	6	81560866	0.0372898	7.39469e-06	7738	TRUE	reported	textfile	0.00258934	20.0832	21.719
	rs2475197	C	G	C	G	-0.259291	0.0892063	0.0552122	0.0686243	FALSE	TRUE	FALSE	32954304	0.0547331	0.0464376	reported	textfile	10	33243232	0.0584633	9.20259e-06	7738	TRUE	reported	textfile	0.00253558	19.6651	21.719
	rs2504016	G	A	G	A	-0.23666	-0.0569058	0.0734254	0.916358	FALSE	FALSE	FALSE	32899506	0.178679	0.0423143	reported	textfile	10	33188434	0.0514871	4.29655e-06	7738	TRUE	reported	textfile	0.00272295	21.1223	21.719
	rs28587107	G	A	G	A	0.236873	0.0283826	0.0738782	0.940884	FALSE	FALSE	FALSE	27437586	0.573536	0.0504265	reported	textfile	9	27437584	0.0503059	2.49362e-06	7738	TRUE	reported	textfile	0.00285708	22.1657	21.719
	rs28879466	C	A	C	A	-0.161023	-0.0146509	0.182904	0.729598	FALSE	FALSE	FALSE	80739404	0.577738	0.0263177	reported	textfile	6	81449121	0.0333785	1.40605e-06	7738	TRUE	reported	textfile	0.00299854	23.2664	21.719
	rs2942201	A	C	A	C	0.120592	-0.0497716	0.438055	0.615695	FALSE	FALSE	FALSE	23561663	0.039885	0.0242205	reported	textfile	8	23419176	0.0258595	3.11071e-06	7738	TRUE	reported	textfile	0.00280252	21.7412	21.719
	rs4233668	A	G	A	G	-0.13538	0.0227523	0.778225	0.197109	FALSE	FALSE	FALSE	154294971	0.441261	0.029546	reported	textfile	2	155151484	0.0306183	9.80031e-06	7738	TRUE	reported	textfile	0.00252013	19.545	21.719
	rs4286009	A	C	A	C	-0.210975	0.0163754	0.0899745	0.884804	FALSE	FALSE	FALSE	67568289	0.656665	0.0368381	reported	textfile	13	68142421	0.0458536	4.20349e-06	7738	TRUE	reported	textfile	0.00272835	21.1642	21.719
	rs4369535	A	G	A	G	-0.205494	0.0305489	0.0947317	0.882763	FALSE	FALSE	FALSE	67596284	0.403028	0.0365319	reported	textfile	13	68170416	0.0446098	4.09515e-06	7738	TRUE	reported	textfile	0.00273476	21.2141	21.719
	rs4460952	T	C	T	C	-0.205986	0.0305494	0.0946566	0.882763	FALSE	FALSE	FALSE	67593494	0.403021	0.0365319	reported	textfile	13	68167626	0.0446042	3.87284e-06	7738	TRUE	reported	textfile	0.00274853	21.3212	21.719
	rs4480668	T	C	T	C	-0.205494	0.0305489	0.0947317	0.882763	FALSE	FALSE	FALSE	67596228	0.403028	0.0365319	reported	textfile	13	68170360	0.0446098	4.09515e-06	7738	TRUE	reported	textfile	0.00273476	21.2141	21.719
	rs4878453	G	A	G	A	0.242077	0.0144407	0.0733257	0.940354	FALSE	FALSE	FALSE	27435735	0.773572	0.050193	reported	textfile	9	27435733	0.050584	1.70443e-06	7738	TRUE	reported	textfile	0.002951	22.8965	21.719
	rs56921855	G	A	G	A	-0.160901	-0.0151867	0.182929	0.729681	FALSE	FALSE	FALSE	80750041	0.563843	0.0263136	reported	textfile	6	81459758	0.0333801	1.43357e-06	7738	TRUE	reported	textfile	0.00299372	23.229	21.719
	rs61074222	C	G	C	G	-0.210428	-0.0262643	0.0941941	0.117353	FALSE	TRUE	FALSE	67569291	0.472214	0.036535	reported	textfile	13	68143423	0.0447813	2.61439e-06	7738	TRUE	reported	textfile	0.00284543	22.075	21.719
	rs62423461	T	C	T	C	-0.168293	-0.00949387	0.161051	0.755951	FALSE	FALSE	FALSE	80819873	0.727276	0.0272224	reported	textfile	6	81529590	0.0350723	1.59904e-06	7738	TRUE	reported	textfile	0.00296677	23.0193	21.719
	rs62424468	C	T	C	T	-0.166739	-0.000271674	0.165431	0.76587	FALSE	FALSE	FALSE	80636109	0.992157	0.0276385	reported	textfile	6	81345826	0.034958	1.84519e-06	7738	TRUE	reported	textfile	0.00293142	22.7441	21.719
	rs62424470	C	T	C	T	-0.170775	-0.0024012	0.162276	0.767423	FALSE	FALSE	FALSE	80650414	0.930929	0.0277033	reported	textfile	6	81360131	0.0351982	1.22338e-06	7738	TRUE	reported	textfile	0.00303291	23.534	21.719
	rs62424607	C	T	C	T	-0.169794	-0.00206732	0.160342	0.768358	FALSE	FALSE	FALSE	80687784	0.940537	0.0277141	reported	textfile	6	81397501	0.0352752	1.48375e-06	7738	TRUE	reported	textfile	0.00298524	23.1629	21.719
	rs62424611	C	T	C	T	-0.219937	-0.0232598	0.0767673	0.834597	FALSE	FALSE	FALSE	80712565	0.459434	0.0314415	reported	textfile	6	81422282	0.0488902	6.84053e-06	7738	TRUE	reported	textfile	0.00260849	20.2321	21.719
	rs62424616	A	G	A	G	-0.163597	-0.00363569	0.162702	0.749689	FALSE	FALSE	FALSE	80722423	0.892799	0.0269784	reported	textfile	6	81432140	0.0347815	2.55676e-06	7738	TRUE	reported	textfile	0.00285092	22.1178	21.719
	rs62424617	C	T	C	T	-0.165753	-0.00888671	0.161473	0.75322	FALSE	FALSE	FALSE	80732168	0.743202	0.0271254	reported	textfile	6	81441885	0.0349338	2.08742e-06	7738	TRUE	reported	textfile	0.00290095	22.5071	21.719
	rs62424637	T	G	T	G	-0.168238	-0.00825356	0.161325	0.754962	FALSE	FALSE	FALSE	80797466	0.761335	0.0271742	reported	textfile	6	81507183	0.0350827	1.62297e-06	7738	TRUE	reported	textfile	0.00296309	22.9906	21.719
	rs6562501	T	C	T	C	-0.198879	0.0305489	0.09502	0.882763	FALSE	FALSE	FALSE	67596027	0.403028	0.0365319	reported	textfile	13	68170159	0.0445485	8.0323e-06	7738	TRUE	reported	textfile	0.00256901	19.9251	21.719
	rs6562502	T	G	T	G	-0.205804	0.0305489	0.094665	0.882763	FALSE	FALSE	FALSE	67599077	0.403028	0.0365319	reported	textfile	13	68173209	0.0446051	3.95175e-06	7738	TRUE	reported	textfile	0.00274357	21.2827	21.719
	rs6562503	A	T	A	T	-0.205804	-0.0305489	0.094665	0.117237	FALSE	TRUE	FALSE	67599300	0.403028	0.0365319	reported	textfile	13	68173432	0.0446051	3.95175e-06	7738	TRUE	reported	textfile	0.00274357	21.2827	21.719
	rs6981529	G	C	G	C	0.117476	0.00294036	0.376357	0.394463	FALSE	TRUE	FALSE	143966399	0.903048	0.0241386	reported	textfile	8	145040567	0.0261757	7.19002e-06	7738	TRUE	reported	textfile	0.00259623	20.1368	21.719
	rs6993022	C	T	C	T	0.119426	-0.00182387	0.3798	0.606857	FALSE	FALSE	FALSE	143965940	0.939767	0.0241373	reported	textfile	8	145040108	0.0261095	4.78377e-06	7738	TRUE	reported	textfile	0.00269649	20.9165	21.719
	rs73200176	T	C	T	C	-0.209398	0.0299158	0.0943923	0.882786	FALSE	FALSE	FALSE	67576299	0.412939	0.0365392	reported	textfile	13	68150431	0.0447539	2.88436e-06	7738	TRUE	reported	textfile	0.00282116	21.8862	21.719
	rs73200191	C	G	C	G	-0.210273	-0.0302407	0.0942103	0.117208	FALSE	TRUE	FALSE	67577973	0.407852	0.0365368	reported	textfile	13	68152105	0.0447818	2.65962e-06	7738	TRUE	reported	textfile	0.00284119	22.042	21.719
	rs7325074	T	A	T	A	-0.209731	-0.0262813	0.0943508	0.117381	FALSE	TRUE	FALSE	67570821	0.471826	0.0365266	reported	textfile	13	68144953	0.0447512	2.77786e-06	7738	TRUE	reported	textfile	0.00283045	21.9585	21.719
	rs7327224	A	G	A	G	-0.209731	0.0274759	0.0943508	0.882626	FALSE	FALSE	FALSE	67572825	0.451933	0.0365275	reported	textfile	13	68146957	0.0447512	2.77786e-06	7738	TRUE	reported	textfile	0.00283045	21.9585	21.719
	rs7327645	A	C	A	C	-0.205521	0.0305491	0.0947149	0.882763	FALSE	FALSE	FALSE	67603305	0.403025	0.0365319	reported	textfile	13	68177437	0.0446081	4.08009e-06	7738	TRUE	reported	textfile	0.00273569	21.2213	21.719
	rs7333072	G	A	G	A	-0.210074	0.0302383	0.0942265	0.882793	FALSE	FALSE	FALSE	67580943	0.40789	0.0365368	reported	textfile	13	68155075	0.0447792	2.71413e-06	7738	TRUE	reported	textfile	0.00283615	22.0029	21.719
	rs7333796	G	A	G	A	-0.204519	0.030177	0.0918505	0.882803	FALSE	FALSE	FALSE	67619836	0.409833	0.0366143	reported	textfile	13	68193968	0.0458346	8.11559e-06	7738	TRUE	reported	textfile	0.00256647	19.9053	21.719
	rs7576386	A	G	A	G	-0.138428	0.0258149	0.7686	0.20559	FALSE	FALSE	FALSE	154271862	0.375446	0.029126	reported	textfile	2	155128375	0.0301616	4.44232e-06	7738	TRUE	reported	textfile	0.00271475	21.0585	21.719
	rs76827222	C	T	C	T	-0.170257	-0.00961585	0.160961	0.756088	FALSE	FALSE	FALSE	80806512	0.723984	0.0272296	reported	textfile	6	81516229	0.0351594	1.28254e-06	7738	TRUE	reported	textfile	0.00302123	23.4431	21.719
	rs7754084	C	T	C	T	-0.163597	-0.00347804	0.162702	0.749685	FALSE	FALSE	FALSE	80719356	0.897423	0.0269787	reported	textfile	6	81429073	0.0347815	2.55676e-06	7738	TRUE	reported	textfile	0.00285092	22.1178	21.719
	rs79065349	A	C	A	C	-0.163597	-0.00354575	0.162702	0.749679	FALSE	FALSE	FALSE	80720344	0.895432	0.0269774	reported	textfile	6	81430061	0.0347815	2.55676e-06	7738	TRUE	reported	textfile	0.00285092	22.1178	21.719
	rs7923287	T	A	T	A	0.139505	-0.0203124	0.723875	0.733346	FALSE	TRUE	FALSE	84081676	0.447209	0.0267242	reported	textfile	10	85841432	0.0290043	1.51074e-06	7738	TRUE	reported	textfile	0.00298078	23.1282	21.719
	rs7982195	G	A	G	A	-0.20583	0.0305813	0.0946482	0.882762	FALSE	FALSE	FALSE	67592401	0.40252	0.0365312	reported	textfile	13	68166533	0.0446034	3.93713e-06	7738	TRUE	reported	textfile	0.00274447	21.2897	21.719
	rs7984064	G	A	G	A	-0.205677	0.0317253	0.0947233	0.882662	FALSE	FALSE	FALSE	67609081	0.384761	0.0365012	reported	textfile	13	68183213	0.0446089	4.01356e-06	7738	TRUE	reported	textfile	0.00273973	21.2528	21.719
	rs7996923	A	G	A	G	-0.205521	0.0305487	0.0947149	0.882763	FALSE	FALSE	FALSE	67603841	0.403032	0.0365319	reported	textfile	13	68177973	0.0446081	4.08009e-06	7738	TRUE	reported	textfile	0.00273569	21.2213	21.719
	rs7997281	T	A	T	A	-0.20547	-0.0305356	0.0940866	0.117233	FALSE	TRUE	FALSE	67612683	0.403283	0.0365358	reported	textfile	13	68186815	0.0452171	5.51785e-06	7738	TRUE	reported	textfile	0.00266137	20.6433	21.719
	rs8000439	T	C	T	C	-0.209463	0.0287051	0.0944007	0.882637	FALSE	FALSE	FALSE	67578274	0.431886	0.0365219	reported	textfile	13	68152406	0.0447546	2.86517e-06	7738	TRUE	reported	textfile	0.00282282	21.8991	21.719
	rs9344041	G	T	G	T	-0.166489	-0.00880047	0.161687	0.753323	FALSE	FALSE	FALSE	80743689	0.745568	0.0271211	reported	textfile	6	81453406	0.0349255	1.87017e-06	7738	TRUE	reported	textfile	0.00292808	22.7182	21.719
	rs9344043	A	G	A	G	-0.165441	-0.00922125	0.161753	0.753392	FALSE	FALSE	FALSE	80762645	0.733855	0.0271212	reported	textfile	6	81472362	0.0349405	2.19104e-06	7738	TRUE	reported	textfile	0.00288897	22.4138	21.719
	rs9344056	A	G	A	G	-0.17033	-0.0112189	0.162359	0.755755	FALSE	FALSE	FALSE	80857851	0.680064	0.0272055	reported	textfile	6	81567568	0.0349944	1.13099e-06	7738	TRUE	reported	textfile	0.00305231	23.685	21.719
	rs9350866	T	C	T	C	-0.166	-0.0033194	0.162851	0.749673	FALSE	FALSE	FALSE	80711433	0.902067	0.0269759	reported	textfile	6	81421150	0.0348137	1.85845e-06	7738	TRUE	reported	textfile	0.00292963	22.7302	21.719
	rs9359435	T	C	T	C	-0.168406	-0.0110887	0.162303	0.755789	FALSE	FALSE	FALSE	80837439	0.683505	0.0271993	reported	textfile	6	81547156	0.0349712	1.46788e-06	7738	TRUE	reported	textfile	0.0029879	23.1836	21.719
	rs9361652	T	A	T	A	-0.165158	0.00922125	0.161803	0.246608	FALSE	TRUE	FALSE	80766223	0.733855	0.0271212	reported	textfile	6	81475940	0.034948	2.29176e-06	7738	TRUE	reported	textfile	0.00287789	22.3276	21.719
	rs9361660	G	A	G	A	-0.169242	-0.010087	0.1612	0.756196	FALSE	FALSE	FALSE	80813130	0.711105	0.0272346	reported	textfile	6	81522847	0.0350771	1.40104e-06	7738	TRUE	reported	textfile	0.00299941	23.2732	21.719
	rs9571824	T	C	T	C	-0.209731	0.0281666	0.0943508	0.882632	FALSE	FALSE	FALSE	67573880	0.44062	0.0365256	reported	textfile	13	68148012	0.0447512	2.77786e-06	7738	TRUE	reported	textfile	0.00283045	21.9585	21.719
	rs9571826	C	A	C	A	-0.205521	0.0305487	0.0947149	0.882763	FALSE	FALSE	FALSE	67603266	0.403032	0.0365319	reported	textfile	13	68177398	0.0446081	4.08009e-06	7738	TRUE	reported	textfile	0.00273569	21.2213	21.719
	rs9571828	C	T	C	T	-0.205568	0.0313397	0.094665	0.882676	FALSE	FALSE	FALSE	67611026	0.390895	0.0365266	reported	textfile	13	68185158	0.044648	4.14047e-06	7738	TRUE	reported	textfile	0.00273206	21.1931	21.719
	rs9571832	A	G	A	G	-0.204958	0.0301978	0.0918498	0.882806	FALSE	FALSE	FALSE	67620378	0.409548	0.0366172	reported	textfile	13	68194510	0.0458337	7.75747e-06	7738	TRUE	reported	textfile	0.00257757	19.9916	21.719
	rs9599236	T	C	T	C	-0.209739	0.0263101	0.0943593	0.882619	FALSE	FALSE	FALSE	67571472	0.471342	0.0365268	reported	textfile	13	68145604	0.0447519	2.77645e-06	7738	TRUE	reported	textfile	0.00283058	21.9595	21.719
	rs9599238	A	G	A	G	-0.209395	0.0287063	0.0944253	0.882637	FALSE	FALSE	FALSE	67577347	0.431865	0.0365219	reported	textfile	13	68151479	0.044756	2.88848e-06	7738	TRUE	reported	textfile	0.00282081	21.8836	21.719
	rs9599239	A	T	A	T	-0.209625	-0.0305508	0.0943185	0.117238	FALSE	TRUE	FALSE	67582816	0.403	0.036532	reported	textfile	13	68156948	0.0447738	2.84289e-06	7738	TRUE	reported	textfile	0.00282476	21.9142	21.719
	rs9599240	G	T	G	T	-0.209441	0.0305503	0.0943269	0.882763	FALSE	FALSE	FALSE	67583374	0.403007	0.036532	reported	textfile	13	68157506	0.0447747	2.90175e-06	7738	TRUE	reported	textfile	0.0028197	21.8749	21.719
	rs9599241	A	G	A	G	-0.205926	0.0277108	0.0946572	0.88337	FALSE	FALSE	FALSE	67588056	0.44933	0.0366287	reported	textfile	13	68162188	0.0446247	3.9384e-06	7738	TRUE	reported	textfile	0.00274441	21.2892	21.719
	rs9599243	T	G	T	G	-0.205677	0.0305491	0.0947233	0.882763	FALSE	FALSE	FALSE	67606392	0.403025	0.0365319	reported	textfile	13	68180524	0.0446089	4.01356e-06	7738	TRUE	reported	textfile	0.00273973	21.2528	21.719
	rs9652229	C	T	C	T	-0.204033	0.0300752	0.0919412	0.882825	FALSE	FALSE	FALSE	67617455	0.411346	0.0366089	reported	textfile	13	68191587	0.0458081	8.42539e-06	7738	TRUE	reported	textfile	0.00255726	19.8337	21.719
	rs9767121	C	T	C	T	-0.165648	-0.00424439	0.163323	0.749615	FALSE	FALSE	FALSE	80688721	0.875004	0.0269818	reported	textfile	6	81398438	0.0347727	1.90033e-06	7738	TRUE	reported	textfile	0.00292412	22.6873	21.719
	rs9791244	A	G	A	G	-0.164138	-0.00350498	0.162711	0.749675	FALSE	FALSE	FALSE	80717497	0.896625	0.0269768	reported	textfile	6	81427214	0.0348112	2.41585e-06	7738	TRUE	reported	textfile	0.00286487	22.2263	21.719
GCST90027450	rs10067620	T	A	T	A	0.13461	0.0331802	0.0791242	0.0603832	FALSE	TRUE	FALSE	159896857	0.508853	0.0502254	reported	textfile	5	159323864	0.0302054	8.33221e-06	7738	TRUE	reported	textfile	0.00256002	19.8552	20.5448
	rs10873850	G	A	G	A	0.0858857	0.0195392	0.2783	0.57946	FALSE	FALSE	FALSE	87488859	0.413002	0.0238684	reported	textfile	1	87954542	0.0185528	3.66978e-06	7738	TRUE	reported	textfile	0.0027618	21.4245	20.5448
	rs1093520	G	T	G	T	0.153028	-0.033303	0.915857	0.105267	FALSE	FALSE	FALSE	98530106	0.400246	0.0395907	reported	textfile	7	98159418	0.0333575	4.48528e-06	7738	TRUE	reported	textfile	0.00271235	21.0398	20.5448
	rs11162029	A	G	A	G	0.0845389	0.01837	0.277572	0.579964	FALSE	FALSE	FALSE	87502605	0.441858	0.0238863	reported	textfile	1	87968288	0.0185428	5.13665e-06	7738	TRUE	reported	textfile	0.00267898	20.7802	20.5448
	rs12146529	T	C	T	C	0.0744377	-0.0472929	0.397649	0.651983	FALSE	FALSE	FALSE	130577959	0.0551366	0.02466	reported	textfile	11	130447854	0.0163129	5.03999e-06	7738	TRUE	reported	textfile	0.00268366	20.8167	20.5448
	rs12146531	A	G	A	G	0.0735458	-0.0475537	0.398036	0.651972	FALSE	FALSE	FALSE	130577988	0.0537948	0.0246586	reported	textfile	11	130447883	0.0162619	6.10914e-06	7738	TRUE	reported	textfile	0.00263632	20.4485	20.5448
	rs12633994	C	T	C	T	-0.149949	0.0107359	0.0598346	0.906409	FALSE	FALSE	FALSE	59924626	0.789273	0.040171	reported	textfile	3	59910352	0.0337919	9.10416e-06	7738	TRUE	reported	textfile	0.00253822	19.6856	20.5448
	rs12653875	G	C	G	C	0.132904	0.0336392	0.0797926	0.0603137	FALSE	TRUE	FALSE	159896372	0.503234	0.050252	reported	textfile	5	159323379	0.0300786	9.93551e-06	7738	TRUE	reported	textfile	0.00251674	19.5186	20.5448
	rs12656915	G	T	G	T	0.13461	-0.0433025	0.0791242	0.939175	FALSE	FALSE	FALSE	159896670	0.385232	0.0498707	reported	textfile	5	159323677	0.0302054	8.33221e-06	7738	TRUE	reported	textfile	0.00256002	19.8552	20.5448
	rs12658337	A	G	A	G	0.132904	-0.0334951	0.0797926	0.9396	FALSE	FALSE	FALSE	159896586	0.504744	0.0502141	reported	textfile	5	159323593	0.0300786	9.93551e-06	7738	TRUE	reported	textfile	0.00251674	19.5186	20.5448
	rs12707570	C	A	C	A	-0.0728993	-0.0369383	0.512255	0.467541	FALSE	FALSE	FALSE	83207982	0.117393	0.0235906	reported	textfile	7	82837298	0.0162424	7.18224e-06	7738	TRUE	reported	textfile	0.0025965	20.1388	20.5448
	rs13358454	T	A	T	A	-0.0792003	0.00592686	0.306839	0.313895	FALSE	TRUE	FALSE	54206638	0.814965	0.0253257	reported	textfile	5	53502468	0.0174217	5.46575e-06	7738	TRUE	reported	textfile	0.0026637	20.6614	20.5448
	rs136103	A	G	A	G	0.0896298	-0.00959595	0.205193	0.722005	FALSE	FALSE	FALSE	46969305	0.714909	0.0262708	reported	textfile	22	47365201	0.0202688	9.7762e-06	7738	TRUE	reported	textfile	0.00252072	19.5495	20.5448
	rs136108	T	C	T	C	0.0919535	-0.00930226	0.209911	0.721094	FALSE	FALSE	FALSE	46972342	0.723517	0.0262953	reported	textfile	22	47368238	0.0200849	4.689e-06	7738	TRUE	reported	textfile	0.00270143	20.9549	20.5448
	rs136109	T	G	T	G	0.0930664	-0.0105107	0.209223	0.721327	FALSE	FALSE	FALSE	46972772	0.689568	0.0263136	reported	textfile	22	47368668	0.0201164	3.72083e-06	7738	TRUE	reported	textfile	0.0027584	21.398	20.5448
	rs136110	C	T	C	T	0.0964705	-0.0133399	0.208243	0.728083	FALSE	FALSE	FALSE	46973764	0.614916	0.0265171	reported	textfile	22	47369660	0.0202552	1.90963e-06	7738	TRUE	reported	textfile	0.00292291	22.6779	20.5448
	rs16882437	T	C	T	C	-0.0791824	-0.00592868	0.306848	0.686105	FALSE	FALSE	FALSE	54205489	0.814909	0.0253256	reported	textfile	5	53501319	0.0174221	5.4949e-06	7738	TRUE	reported	textfile	0.00266238	20.6511	20.5448
	rs16882447	A	C	A	C	-0.0784958	-0.00593967	0.306593	0.686106	FALSE	FALSE	FALSE	54207072	0.814575	0.0253261	reported	textfile	5	53502902	0.0174253	6.6463e-06	7738	TRUE	reported	textfile	0.00261557	20.2871	20.5448
	rs1921585	G	A	G	A	0.0741296	-0.0372279	0.40243	0.655911	FALSE	FALSE	FALSE	130630638	0.132297	0.0247344	reported	textfile	11	130500533	0.0162714	5.21819e-06	7738	TRUE	reported	textfile	0.00267511	20.7501	20.5448
	rs2035940	C	T	C	T	0.0733843	-0.0066351	0.48388	0.505595	FALSE	FALSE	FALSE	130536146	0.777913	0.0235255	reported	textfile	11	130406041	0.016502	8.70823e-06	7738	TRUE	reported	textfile	0.00254915	19.7706	20.5448
	rs2824667	C	G	C	G	0.073385	0.0272192	0.584268	0.50488	FALSE	TRUE	TRUE	18161545	0.247958	0.0235598	reported	textfile	21	19533862	0.0164301	7.95097e-06	7738	TRUE	reported	textfile	0.0025715	19.9444	20.5448
	rs3797252	C	T	C	T	-0.0794419	-0.00557322	0.307103	0.686019	FALSE	FALSE	FALSE	54204784	0.825799	0.0253221	reported	textfile	5	53500614	0.0174202	5.10705e-06	7738	TRUE	reported	textfile	0.00268039	20.7913	20.5448
	rs38127	C	T	C	T	0.0760269	-0.00625132	0.645907	0.291718	FALSE	FALSE	FALSE	78640059	0.809617	0.0259478	reported	textfile	7	78269375	0.0168296	6.25922e-06	7738	TRUE	reported	textfile	0.00263036	20.4021	20.5448
	rs4937552	C	G	C	G	0.0733779	0.0377205	0.40244	0.343921	FALSE	TRUE	FALSE	130630880	0.12759	0.0247562	reported	textfile	11	130500775	0.0162931	6.68082e-06	7738	TRUE	reported	textfile	0.00261431	20.2773	20.5448
	rs57562307	A	T	A	T	-0.0784968	0.00592692	0.3066	0.313894	FALSE	TRUE	FALSE	54206791	0.814964	0.0253257	reported	textfile	5	53502621	0.0174251	6.64309e-06	7738	TRUE	reported	textfile	0.0026157	20.2881	20.5448
	rs59430615	A	G	A	G	-0.0791824	-0.00592903	0.306848	0.686105	FALSE	FALSE	FALSE	54205459	0.814898	0.0253256	reported	textfile	5	53501289	0.0174221	5.4949e-06	7738	TRUE	reported	textfile	0.00266238	20.6511	20.5448
	rs61915762	A	G	A	G	0.0827921	-0.0416982	0.275511	0.751325	FALSE	FALSE	FALSE	130572766	0.122986	0.0270354	reported	textfile	11	130442661	0.0180027	4.24766e-06	7738	TRUE	reported	textfile	0.00272576	21.1442	20.5448
	rs61915763	C	G	C	G	0.0824606	0.041547	0.275966	0.248698	FALSE	TRUE	FALSE	130572806	0.124344	0.0270349	reported	textfile	11	130442701	0.0179886	4.56089e-06	7738	TRUE	reported	textfile	0.00270827	21.0081	20.5448
	rs62018962	A	C	A	C	-0.148269	-0.0236677	0.0988924	0.912784	FALSE	FALSE	FALSE	95436288	0.568065	0.0414566	reported	textfile	15	95979517	0.0312705	2.12158e-06	7738	TRUE	reported	textfile	0.00289696	22.476	20.5448
	rs6782393	C	A	C	A	-0.151342	0.0115644	0.0605063	0.906272	FALSE	FALSE	FALSE	59927207	0.773334	0.0401517	reported	textfile	3	59912933	0.033707	7.12459e-06	7738	TRUE	reported	textfile	0.00259848	20.1542	20.5448
	rs6793471	A	G	A	G	-0.151302	0.0116237	0.0604772	0.906278	FALSE	FALSE	FALSE	59927146	0.772213	0.0401535	reported	textfile	3	59912872	0.0337158	7.20361e-06	7738	TRUE	reported	textfile	0.00259576	20.1331	20.5448
	rs6865125	C	T	C	T	-0.0791935	-0.00592685	0.306848	0.686105	FALSE	FALSE	FALSE	54206547	0.814966	0.0253257	reported	textfile	5	53502377	0.0174221	5.47873e-06	7738	TRUE	reported	textfile	0.00266312	20.6569	20.5448
	rs73200771	A	G	A	G	-0.163263	-0.0662305	0.0520806	0.959849	FALSE	FALSE	FALSE	87893163	0.271575	0.0602401	reported	textfile	12	88286940	0.0358564	5.28251e-06	7738	TRUE	reported	textfile	0.00267209	20.7267	20.5448
	rs7705101	T	C	T	C	-0.0788535	-0.00546992	0.30698	0.685948	FALSE	FALSE	FALSE	54204134	0.828999	0.0253254	reported	textfile	5	53499964	0.0174193	5.98839e-06	7738	TRUE	reported	textfile	0.00264121	20.4865	20.5448
	rs7715885	T	C	T	C	-0.0792053	-0.0059277	0.306842	0.686105	FALSE	FALSE	FALSE	54206259	0.814939	0.0253257	reported	textfile	5	53502089	0.0174218	5.45909e-06	7738	TRUE	reported	textfile	0.00266401	20.6638	20.5448
	rs8052034	A	G	A	G	0.0740262	-0.00223849	0.559625	0.374859	FALSE	FALSE	FALSE	51459537	0.927168	0.0244888	reported	textfile	16	51493448	0.0163168	5.7115e-06	7738	TRUE	reported	textfile	0.00265289	20.5773	20.5448
	rs9305847	C	A	C	A	0.0762532	-0.0282432	0.626513	0.432682	FALSE	FALSE	FALSE	18167476	0.235188	0.0237918	reported	textfile	21	19539793	0.0168897	6.33826e-06	7738	TRUE	reported	textfile	0.00262725	20.3779	20.5448
	rs9974959	G	A	G	A	0.0758587	-0.0276578	0.626736	0.432683	FALSE	FALSE	FALSE	18167516	0.245043	0.0237922	reported	textfile	21	19539833	0.0168922	7.09708e-06	7738	TRUE	reported	textfile	0.00259944	20.1617	20.5448
GCST90027451	rs10267604	C	G	C	G	-0.0764351	-0.0433543	0.653998	0.615953	FALSE	TRUE	FALSE	122333549	0.0736021	0.0242327	reported	textfile	7	121973603	0.0169762	6.71599e-06	7738	TRUE	reported	textfile	0.002613	20.2671	21.5551
	rs10507911	T	G	T	G	0.0985549	-0.0313426	0.206578	0.743941	FALSE	FALSE	FALSE	80615166	0.248426	0.0271557	reported	textfile	13	81189301	0.0198544	6.91019e-07	7738	TRUE	reported	textfile	0.00317419	24.6338	21.5551
	rs113902391	A	G	A	G	0.0922389	0.0132257	0.217886	0.806933	FALSE	FALSE	FALSE	86850545	0.65563	0.0296571	reported	textfile	5	86146362	0.01946	2.13801e-06	7738	TRUE	reported	textfile	0.00289504	22.4611	21.5551
	rs12490065	A	G	A	G	0.0959472	0.00524399	0.22917	0.795047	FALSE	FALSE	FALSE	10585877	0.859518	0.029629	reported	textfile	3	10627561	0.0208734	4.29388e-06	7738	TRUE	reported	textfile	0.00272311	21.1235	21.5551
	rs149811032	A	G	A	G	-0.142534	-0.0739402	0.0677355	0.931354	FALSE	FALSE	FALSE	49533859	0.107732	0.0459692	reported	textfile	20	48150396	0.0320579	8.74279e-06	7738	TRUE	reported	textfile	0.00254818	19.7631	21.5551
	rs17072977	A	C	A	C	0.101321	-0.0270477	0.197845	0.746183	FALSE	FALSE	FALSE	80603113	0.321108	0.0272608	reported	textfile	13	81177248	0.0204192	6.97445e-07	7738	TRUE	reported	textfile	0.00317185	24.6155	21.5551
	rs2846765	T	C	T	C	0.0802031	0.0242606	0.515201	0.430124	FALSE	FALSE	FALSE	865458	0.313792	0.0240848	reported	textfile	18	865459	0.0173136	3.6151e-06	7738	TRUE	reported	textfile	0.00276552	21.4534	21.5551
	rs61966099	T	C	T	C	0.101802	-0.0272743	0.197784	0.746162	FALSE	FALSE	FALSE	80607317	0.317062	0.0272602	reported	textfile	13	81181452	0.0204163	6.15531e-07	7738	TRUE	reported	textfile	0.00320285	24.8569	21.5551
	rs61966118	T	G	T	G	0.0947127	-0.0117838	0.198036	0.764587	FALSE	FALSE	FALSE	80651277	0.672269	0.0278552	reported	textfile	13	81225412	0.0204228	3.52476e-06	7738	TRUE	reported	textfile	0.00277174	21.5017	21.5551
	rs66462974	C	G	C	G	0.091601	-0.0130933	0.219091	0.193292	FALSE	TRUE	FALSE	86843440	0.658808	0.0296523	reported	textfile	5	86139257	0.0194432	2.46246e-06	7738	TRUE	reported	textfile	0.00286017	22.1898	21.5551
	rs6858020	A	T	A	T	-0.0727501	-0.00253817	0.565376	0.586323	FALSE	TRUE	TRUE	180387552	0.915057	0.0237963	reported	textfile	4	181308705	0.0161757	6.87607e-06	7738	TRUE	reported	textfile	0.00260723	20.2222	21.5551
	rs7706893	C	T	C	T	-0.0744689	0.0297069	0.366965	0.686372	FALSE	FALSE	FALSE	96592134	0.241711	0.0253749	reported	textfile	5	95927838	0.0165718	6.99971e-06	7738	TRUE	reported	textfile	0.00260285	20.1882	21.5551
	rs7707269	C	T	C	T	-0.0744962	0.02797	0.366956	0.686642	FALSE	FALSE	FALSE	96592332	0.270591	0.025388	reported	textfile	5	95928036	0.0165717	6.944e-06	7738	TRUE	reported	textfile	0.00260479	20.2033	21.5551
	rs7725567	T	C	T	C	-0.0740706	0.0281425	0.366891	0.686638	FALSE	FALSE	FALSE	96592547	0.267636	0.0253873	reported	textfile	5	95928251	0.0165242	7.37548e-06	7738	TRUE	reported	textfile	0.00258998	20.0881	21.5551
	rs77906768	G	A	G	A	0.133484	-0.026088	0.0861075	0.921254	FALSE	FALSE	FALSE	74099026	0.556532	0.0443673	reported	textfile	9	76713942	0.0293512	5.42026e-06	7738	TRUE	reported	textfile	0.00266575	20.6773	21.5551
	rs9318711	T	C	T	C	0.105877	-0.0363569	0.169881	0.884233	FALSE	FALSE	FALSE	80748699	0.325442	0.036973	reported	textfile	13	81322834	0.0220012	1.4918e-06	7738	TRUE	reported	textfile	0.0029839	23.1525	21.5551
	rs9531101	T	C	T	C	0.0927946	-0.016182	0.194267	0.766073	FALSE	FALSE	FALSE	80630383	0.562	0.0279061	reported	textfile	13	81204518	0.0204598	5.74765e-06	7738	TRUE	reported	textfile	0.00265131	20.5651	21.5551
	rs9545502	T	C	T	C	0.102021	-0.0294573	0.197933	0.748222	FALSE	FALSE	FALSE	80593846	0.281187	0.0273346	reported	textfile	13	81167981	0.0204183	5.83674e-07	7738	TRUE	reported	textfile	0.00321597	24.959	21.5551
	rs9545516	G	T	G	T	0.0938351	-0.0161812	0.193905	0.766073	FALSE	FALSE	FALSE	80629964	0.562019	0.0279061	reported	textfile	13	81204099	0.0204827	4.62328e-06	7738	TRUE	reported	textfile	0.0027049	20.9819	21.5551
	rs9545518	T	G	T	G	0.093293	-0.0155424	0.193802	0.766015	FALSE	FALSE	FALSE	80643572	0.577705	0.0279167	reported	textfile	13	81217707	0.0204903	5.28798e-06	7738	TRUE	reported	textfile	0.00267184	20.7247	21.5551
	rs9632442	C	T	C	T	-0.0757915	0.00482786	0.330168	0.752885	FALSE	FALSE	FALSE	96587880	0.859506	0.0272757	reported	textfile	5	95923584	0.0170065	8.32588e-06	7738	TRUE	reported	textfile	0.00256017	19.8563	21.5551
	rs9632443	G	A	G	A	-0.0756545	0.00577809	0.329445	0.753247	FALSE	FALSE	FALSE	96588119	0.832443	0.0273106	reported	textfile	5	95923823	0.0170306	8.90102e-06	7738	TRUE	reported	textfile	0.00254375	19.7287	21.5551
GCST90027452	rs10792430	A	T	A	T	-0.163467	0.00339173	0.205277	0.206088	FALSE	TRUE	FALSE	64379642	0.907262	0.0291153	reported	textfile	11	64147114	0.036177	6.22702e-06	7738	TRUE	reported	textfile	0.00263161	20.4119	20.4222
	rs111373328	C	A	C	A	-0.209827	-0.0473861	0.11129	0.887126	FALSE	FALSE	FALSE	110166738	0.210296	0.0378256	reported	textfile	10	111926496	0.0466309	6.80362e-06	7738	TRUE	reported	textfile	0.00260983	20.2424	20.4222
	rs11231774	G	A	G	A	-0.164973	-0.00332103	0.205246	0.793923	FALSE	FALSE	FALSE	64376537	0.909202	0.0291204	reported	textfile	11	64144009	0.0362076	5.20595e-06	7738	TRUE	reported	textfile	0.00267568	20.7546	20.4222
	rs11258958	T	C	T	C	-0.129722	0.0449822	0.45354	0.545735	FALSE	FALSE	FALSE	14231579	0.0580791	0.0237361	reported	textfile	10	14273578	0.0293652	9.98321e-06	7738	TRUE	reported	textfile	0.00251558	19.5096	20.4222
	rs113440680	A	C	A	C	-0.243606	-0.0420725	0.0756902	0.937917	FALSE	FALSE	FALSE	110201095	0.389745	0.0489169	reported	textfile	10	111960853	0.0542477	7.1015e-06	7738	TRUE	reported	textfile	0.00259929	20.1605	20.4222
	rs11601872	A	G	A	G	-0.165533	-0.00717787	0.205552	0.795733	FALSE	FALSE	FALSE	64380155	0.806683	0.0293324	reported	textfile	11	64147627	0.036189	4.78211e-06	7738	TRUE	reported	textfile	0.00269659	20.9172	20.4222
	rs1198984	A	G	A	G	0.161185	0.00402345	0.794316	0.205878	FALSE	FALSE	FALSE	64380948	0.890143	0.0291294	reported	textfile	11	64148420	0.036119	8.09674e-06	7738	TRUE	reported	textfile	0.00256704	19.9097	20.4222
	rs12417275	C	A	C	A	-0.163694	-0.00333125	0.205477	0.793925	FALSE	FALSE	FALSE	64376302	0.908926	0.0291209	reported	textfile	11	64143774	0.0362019	6.13451e-06	7738	TRUE	reported	textfile	0.00263529	20.4405	20.4222
	rs1325380	C	T	C	T	0.162314	-0.012698	0.242391	0.785011	FALSE	FALSE	FALSE	108101205	0.658807	0.0287572	reported	textfile	13	108753553	0.0352487	4.12791e-06	7738	TRUE	reported	textfile	0.0027328	21.1989	20.4222
	rs2209467	C	T	C	T	0.162831	-0.00361764	0.224051	0.820651	FALSE	FALSE	FALSE	108097808	0.906234	0.0307125	reported	textfile	13	108750156	0.035819	5.46865e-06	7738	TRUE	reported	textfile	0.00266355	20.6602	20.4222
	rs4564441	G	A	G	A	-0.160373	0.00391747	0.776701	0.179255	FALSE	FALSE	FALSE	108087496	0.898534	0.0307221	reported	textfile	13	108739844	0.0360343	8.56485e-06	7738	TRUE	reported	textfile	0.00255324	19.8024	20.4222
	rs471584	T	C	T	C	0.163796	0.00331978	0.794756	0.205979	FALSE	FALSE	FALSE	64381780	0.90922	0.0291153	reported	textfile	11	64149252	0.036177	5.96541e-06	7738	TRUE	reported	textfile	0.00264219	20.4941	20.4222
	rs503456	G	T	G	T	0.26956	0.0236845	0.061569	0.944467	FALSE	FALSE	FALSE	145249902	0.650474	0.0522717	reported	textfile	6	145571038	0.0609123	9.62764e-06	7738	TRUE	reported	textfile	0.00252449	19.5789	20.4222
	rs526957	C	T	C	T	0.26956	0.023851	0.061569	0.944461	FALSE	FALSE	FALSE	145249187	0.648163	0.0522686	reported	textfile	6	145570323	0.0609123	9.62764e-06	7738	TRUE	reported	textfile	0.00252449	19.5789	20.4222
	rs538952	A	C	A	C	0.274151	0.0270125	0.0624269	0.944141	FALSE	FALSE	FALSE	145243959	0.604469	0.0521493	reported	textfile	6	145565095	0.060697	6.28073e-06	7738	TRUE	reported	textfile	0.0026295	20.3954	20.4222
	rs555924	T	C	T	C	0.2724	0.0280746	0.0620846	0.944212	FALSE	FALSE	FALSE	145241655	0.590686	0.0521986	reported	textfile	6	145562791	0.0610832	8.2158e-06	7738	TRUE	reported	textfile	0.00256346	19.8819	20.4222
	rs55751012	T	C	T	C	-0.243596	-0.043205	0.0757454	0.937933	FALSE	FALSE	FALSE	110197096	0.3771	0.0489157	reported	textfile	10	111956854	0.0542179	7.02603e-06	7738	TRUE	reported	textfile	0.00260192	20.181	20.4222
	rs559928	C	T	C	T	0.160564	0.0264941	0.794195	0.197749	FALSE	FALSE	FALSE	64382898	0.369867	0.0295455	reported	textfile	11	64150370	0.0361107	8.73012e-06	7738	TRUE	reported	textfile	0.00254852	19.7657	20.4222
	rs56339474	T	C	T	C	-0.164008	-0.00319879	0.205433	0.793923	FALSE	FALSE	FALSE	64375006	0.912546	0.0291255	reported	textfile	11	64142478	0.0362062	5.90283e-06	7738	TRUE	reported	textfile	0.00264475	20.5141	20.4222
	rs564362	T	C	T	C	0.272969	0.0274962	0.062207	0.944223	FALSE	FALSE	FALSE	145244369	0.598257	0.0521839	reported	textfile	6	145565505	0.0607837	7.09447e-06	7738	TRUE	reported	textfile	0.00259952	20.1623	20.4222
	rs59250950	A	C	A	C	-0.219299	-0.0323759	0.098629	0.923799	FALSE	FALSE	FALSE	110185644	0.467368	0.0445478	reported	textfile	10	111945402	0.0490685	7.84964e-06	7738	TRUE	reported	textfile	0.00257466	19.969	20.4222
	rs61861701	G	A	G	A	0.155103	-0.00628907	0.256849	0.814491	FALSE	FALSE	FALSE	110605246	0.837826	0.030727	reported	textfile	10	112365004	0.0347347	7.99282e-06	7738	TRUE	reported	textfile	0.0025702	19.9343	20.4222
	rs641168	G	C	G	C	0.161277	-0.00344475	0.794093	0.793907	FALSE	TRUE	FALSE	64378817	0.905827	0.0291178	reported	textfile	11	64146289	0.0361438	8.11652e-06	7738	TRUE	reported	textfile	0.00256645	19.9051	20.4222
	rs7068964	G	A	G	A	-0.130976	0.0462862	0.453157	0.546012	FALSE	FALSE	FALSE	14233727	0.0509284	0.0237111	reported	textfile	10	14275726	0.0293547	8.12625e-06	7738	TRUE	reported	textfile	0.00256616	19.9029	20.4222
	rs7076402	T	C	T	C	-0.207823	-0.0485532	0.110862	0.887353	FALSE	FALSE	FALSE	110165472	0.199585	0.0378513	reported	textfile	10	111925230	0.0468039	8.9838e-06	7738	TRUE	reported	textfile	0.00254149	19.7111	20.4222
	rs7076772	A	G	A	G	-0.210149	-0.0485533	0.110906	0.887354	FALSE	FALSE	FALSE	110165492	0.199582	0.0378512	reported	textfile	10	111925250	0.0467478	6.94432e-06	7738	TRUE	reported	textfile	0.00260478	20.2032	20.4222
	rs7080762	A	G	A	G	-0.208781	-0.0489331	0.111037	0.887376	FALSE	FALSE	FALSE	110165901	0.196137	0.0378553	reported	textfile	10	111925659	0.0467054	7.8161e-06	7738	TRUE	reported	textfile	0.00257572	19.9772	20.4222
	rs7104891	A	G	A	G	0.163891	0.0023677	0.794533	0.204394	FALSE	FALSE	FALSE	64377432	0.935575	0.0292914	reported	textfile	11	64144904	0.0362019	5.97888e-06	7738	TRUE	reported	textfile	0.00264162	20.4897	20.4222
	rs7209568	G	A	G	A	0.172899	0.0372763	0.187878	0.788845	FALSE	FALSE	FALSE	1218296	0.201577	0.0291889	reported	textfile	17	1121590	0.0374386	3.87079e-06	7738	TRUE	reported	textfile	0.00274866	21.3223	20.4222
	rs72830406	G	C	G	C	-0.233287	0.039187	0.10827	0.107711	FALSE	TRUE	FALSE	110159462	0.310059	0.0386041	reported	textfile	10	111919220	0.0473559	8.38205e-07	7738	TRUE	reported	textfile	0.0031264	24.2617	20.4222
	rs72830407	C	T	C	T	-0.236234	-0.0564784	0.0930545	0.93969	FALSE	FALSE	FALSE	110159516	0.257816	0.0499116	reported	textfile	10	111919274	0.0505357	2.94544e-06	7738	TRUE	reported	textfile	0.00281601	21.8462	20.4222
	rs72830420	C	A	C	A	-0.208905	-0.0480024	0.111411	0.887154	FALSE	FALSE	FALSE	110167909	0.204474	0.0378297	reported	textfile	10	111927667	0.0466309	7.46535e-06	7738	TRUE	reported	textfile	0.002587	20.0649	20.4222
	rs72830427	A	T	A	T	-0.210946	0.0322015	0.117363	0.111708	FALSE	TRUE	FALSE	110175792	0.391834	0.0376055	reported	textfile	10	111935550	0.0457059	3.92536e-06	7738	TRUE	reported	textfile	0.00274521	21.2954	20.4222
	rs72830430	C	T	C	T	-0.217801	-0.0328931	0.098441	0.923809	FALSE	FALSE	FALSE	110181920	0.460264	0.0445457	reported	textfile	10	111941678	0.0490695	9.0542e-06	7738	TRUE	reported	textfile	0.00253959	19.6963	20.4222
	rs72830431	A	G	A	G	-0.24075	-0.0430068	0.0757359	0.937941	FALSE	FALSE	FALSE	110191289	0.379284	0.0489149	reported	textfile	10	111951047	0.0544182	9.68545e-06	7738	TRUE	reported	textfile	0.00252301	19.5673	20.4222
	rs72830432	T	C	T	C	-0.240948	-0.0430336	0.0758911	0.93794	FALSE	FALSE	FALSE	110192418	0.378984	0.0489146	reported	textfile	10	111952176	0.0544059	9.48004e-06	7738	TRUE	reported	textfile	0.00252829	19.6084	20.4222
	rs72830436	C	A	C	A	-0.243596	-0.0428236	0.0757454	0.937928	FALSE	FALSE	FALSE	110198386	0.381347	0.0489179	reported	textfile	10	111958144	0.0542179	7.02603e-06	7738	TRUE	reported	textfile	0.00260192	20.181	20.4222
	rs72830437	A	G	A	G	-0.243606	-0.0422193	0.0756902	0.93792	FALSE	FALSE	FALSE	110200432	0.388103	0.0489179	reported	textfile	10	111960190	0.0542477	7.1015e-06	7738	TRUE	reported	textfile	0.00259929	20.1605	20.4222
	rs72830445	T	C	T	C	-0.245893	-0.0308447	0.0746952	0.932146	FALSE	FALSE	FALSE	110219441	0.507735	0.0465673	reported	textfile	10	111979199	0.0552124	8.44501e-06	7738	TRUE	reported	textfile	0.00255669	19.8293	20.4222
	rs72830447	T	C	T	C	-0.245893	-0.0321555	0.0746952	0.932176	FALSE	FALSE	FALSE	110220011	0.489893	0.0465699	reported	textfile	10	111979769	0.0552124	8.44501e-06	7738	TRUE	reported	textfile	0.00255669	19.8293	20.4222
	rs72924202	T	C	T	C	-0.167725	-0.00269553	0.206071	0.793922	FALSE	FALSE	FALSE	64365756	0.926275	0.0291308	reported	textfile	11	64133228	0.0361181	3.4209e-06	7738	TRUE	reported	textfile	0.00277913	21.5592	20.4222
	rs72926038	C	G	C	G	-0.164008	0.00318734	0.205433	0.206078	FALSE	TRUE	FALSE	64374919	0.912858	0.0291256	reported	textfile	11	64142391	0.0362062	5.90283e-06	7738	TRUE	reported	textfile	0.00264475	20.5141	20.4222
	rs72926042	T	C	T	C	-0.164008	-0.00325273	0.205433	0.793923	FALSE	FALSE	FALSE	64375533	0.91107	0.029123	reported	textfile	11	64143005	0.0362062	5.90283e-06	7738	TRUE	reported	textfile	0.00264475	20.5141	20.4222
	rs72926046	G	A	G	A	-0.163694	-0.00304754	0.205477	0.793898	FALSE	FALSE	FALSE	64375915	0.916651	0.0291203	reported	textfile	11	64143387	0.0362019	6.13451e-06	7738	TRUE	reported	textfile	0.00263529	20.4405	20.4222
	rs72926050	G	C	G	C	-0.163694	0.00332081	0.205477	0.206077	FALSE	TRUE	FALSE	64376102	0.90921	0.0291209	reported	textfile	11	64143574	0.0362019	6.13451e-06	7738	TRUE	reported	textfile	0.00263529	20.4405	20.4222
	rs76481851	A	G	A	G	-0.164008	-0.00324381	0.205433	0.793922	FALSE	FALSE	FALSE	64375507	0.911313	0.029123	reported	textfile	11	64142979	0.0362062	5.90283e-06	7738	TRUE	reported	textfile	0.00264475	20.5141	20.4222
	rs77521331	G	C	G	C	-0.211466	0.0485589	0.113161	0.112647	FALSE	TRUE	FALSE	110164634	0.199533	0.0378514	reported	textfile	10	111924392	0.0463143	4.97393e-06	7738	TRUE	reported	textfile	0.00268691	20.842	20.4222
	rs79001385	G	A	G	A	-0.236556	-0.0527218	0.0929881	0.939543	FALSE	FALSE	FALSE	110162139	0.290142	0.0498404	reported	textfile	10	111921897	0.0505706	2.90061e-06	7738	TRUE	reported	textfile	0.00281979	21.8756	20.4222
	rs7911181	G	A	G	A	-0.213048	-0.0380215	0.112657	0.890196	FALSE	FALSE	FALSE	110155114	0.320624	0.0382827	reported	textfile	10	111914872	0.0464006	4.40109e-06	7738	TRUE	reported	textfile	0.00271705	21.0764	20.4222
	rs7918659	A	G	A	G	-0.211244	-0.0487327	0.113237	0.887366	FALSE	FALSE	FALSE	110169008	0.197969	0.0378548	reported	textfile	10	111928766	0.0460703	4.53451e-06	7738	TRUE	reported	textfile	0.00270969	21.0191	20.4222
GCST90027453	rs10238229	T	C	T	C	0.0962573	-0.00695336	0.794063	0.269796	FALSE	FALSE	FALSE	97604118	0.794695	0.0267212	reported	textfile	7	97233430	0.0216067	8.39054e-06	7738	TRUE	reported	textfile	0.00255829	19.8417	21.0006
	rs1034938	G	A	G	A	-0.0883204	-0.00259912	0.218123	0.78928	FALSE	FALSE	FALSE	115729688	0.928166	0.0288304	reported	textfile	10	117489198	0.0198362	8.48809e-06	7738	TRUE	reported	textfile	0.00255544	19.8195	21.0006
	rs108533	T	A	T	A	0.0725562	0.0171219	0.469943	0.366777	FALSE	TRUE	TRUE	116730995	0.48466	0.0245009	reported	textfile	11	116601711	0.0163567	9.16959e-06	7738	TRUE	reported	textfile	0.00253645	19.6719	21.0006
	rs11025798	A	G	A	G	0.0813802	0.0323657	0.436503	0.540962	FALSE	FALSE	FALSE	20884396	0.176491	0.0239455	reported	textfile	11	20905942	0.0180881	6.82433e-06	7738	TRUE	reported	textfile	0.00260909	20.2367	21.0006
	rs11071397	C	G	C	G	0.0924233	-0.0179106	0.190099	0.224709	FALSE	TRUE	FALSE	58815298	0.526287	0.0282643	reported	textfile	15	59107497	0.0207399	8.33796e-06	7738	TRUE	reported	textfile	0.00255981	19.8535	21.0006
	rs1145191	C	G	C	G	-0.0743626	0.0127661	0.516588	0.574378	FALSE	TRUE	TRUE	116700002	0.593118	0.0238921	reported	textfile	11	116570718	0.0162468	4.71531e-06	7738	TRUE	reported	textfile	0.00270004	20.9441	21.0006
	rs1145193	A	G	A	G	-0.0745543	-0.0127758	0.516566	0.425629	FALSE	FALSE	FALSE	116700226	0.592835	0.0238919	reported	textfile	11	116570942	0.0162492	4.47116e-06	7738	TRUE	reported	textfile	0.00271314	21.046	21.0006
	rs1145195	G	A	G	A	-0.0745401	-0.0124339	0.517203	0.425233	FALSE	FALSE	FALSE	116700534	0.602786	0.023893	reported	textfile	11	116571250	0.0162383	4.42425e-06	7738	TRUE	reported	textfile	0.00271575	21.0662	21.0006
	rs1145196	C	T	C	T	-0.0745025	-0.0115444	0.517238	0.425502	FALSE	FALSE	FALSE	116701489	0.629031	0.0238969	reported	textfile	11	116572205	0.0162376	4.46941e-06	7738	TRUE	reported	textfile	0.00271325	21.0468	21.0006
	rs1145208	C	A	C	A	0.0751212	-0.0152271	0.465999	0.639663	FALSE	FALSE	FALSE	116767269	0.53545	0.0245714	reported	textfile	11	116637985	0.0163333	4.23985e-06	7738	TRUE	reported	textfile	0.00272623	21.1478	21.0006
	rs1145211	C	A	C	A	-0.0868532	0.0346921	0.638731	0.279429	FALSE	FALSE	FALSE	116686500	0.185107	0.0261788	reported	textfile	11	116557216	0.0170117	3.29913e-07	7738	TRUE	reported	textfile	0.00335728	26.0594	21.0006
	rs1240768	T	C	T	C	-0.0834376	0.00690178	0.60386	0.30223	FALSE	FALSE	FALSE	116645936	0.787809	0.0256423	reported	textfile	11	116516653	0.0168642	7.51242e-07	7738	TRUE	reported	textfile	0.00315349	24.4726	21.0006
	rs1240772	C	G	C	G	-0.0747802	-0.00835233	0.433546	0.406705	FALSE	TRUE	TRUE	116648412	0.727699	0.023988	reported	textfile	11	116519129	0.0165741	6.42555e-06	7738	TRUE	reported	textfile	0.00262388	20.3517	21.0006
	rs1240776	C	T	C	T	-0.07742	0.00942039	0.579651	0.33893	FALSE	FALSE	FALSE	116665564	0.704604	0.0248485	reported	textfile	11	116536281	0.0166032	3.11681e-06	7738	TRUE	reported	textfile	0.00280205	21.7375	21.0006
	rs1240781	C	T	C	T	-0.0724752	0.0140716	0.571815	0.355177	FALSE	FALSE	FALSE	116704101	0.569222	0.0247218	reported	textfile	11	116574817	0.0163854	9.72658e-06	7738	TRUE	reported	textfile	0.00252197	19.5593	21.0006
	rs1240783	T	C	T	C	-0.0744977	-0.012649	0.517162	0.425356	FALSE	FALSE	FALSE	116701809	0.596547	0.0238943	reported	textfile	11	116572525	0.0162426	4.5062e-06	7738	TRUE	reported	textfile	0.00271123	21.0311	21.0006
	rs12437952	A	C	A	C	0.0923421	0.0186612	0.185239	0.780429	FALSE	FALSE	FALSE	58757147	0.513086	0.0285322	reported	textfile	15	59049346	0.0207826	8.86135e-06	7738	TRUE	reported	textfile	0.00254486	19.7373	21.0006
	rs12439231	T	C	T	C	0.0999407	0.00699905	0.156856	0.789849	FALSE	FALSE	FALSE	58733396	0.809092	0.0289699	reported	textfile	15	59025595	0.0221425	6.37602e-06	7738	TRUE	reported	textfile	0.0026258	20.3666	21.0006
	rs12439632	C	G	C	G	0.0916754	-0.017898	0.190616	0.224709	FALSE	TRUE	FALSE	58811764	0.52658	0.0282644	reported	textfile	15	59103963	0.0206203	8.75286e-06	7738	TRUE	reported	textfile	0.00254788	19.7607	21.0006
	rs12440267	A	G	A	G	0.100269	0.0107751	0.156726	0.789856	FALSE	FALSE	FALSE	58707169	0.709702	0.0289453	reported	textfile	15	58999368	0.0221341	5.89671e-06	7738	TRUE	reported	textfile	0.00264503	20.5162	21.0006
	rs12441313	T	G	T	G	0.100025	0.0109332	0.156782	0.792754	FALSE	FALSE	FALSE	58723289	0.707143	0.0291011	reported	textfile	15	59015488	0.0221372	6.23075e-06	7738	TRUE	reported	textfile	0.00263147	20.4108	21.0006
	rs12591310	A	G	A	G	0.0917871	0.0177742	0.190408	0.775304	FALSE	FALSE	FALSE	58792069	0.529472	0.0282663	reported	textfile	15	59084268	0.0206108	8.45415e-06	7738	TRUE	reported	textfile	0.00255643	19.8272	21.0006
	rs12595057	G	A	G	A	0.0924634	0.0272728	0.19004	0.778261	FALSE	FALSE	FALSE	58830627	0.337645	0.0284438	reported	textfile	15	59122826	0.0207443	8.30023e-06	7738	TRUE	reported	textfile	0.00256094	19.8623	21.0006
	rs1263056	G	A	G	A	-0.0764375	-0.00695368	0.470591	0.423808	FALSE	FALSE	FALSE	116705699	0.771488	0.0239428	reported	textfile	11	116576415	0.0162526	2.56265e-06	7738	TRUE	reported	textfile	0.00285035	22.1134	21.0006
	rs1263058	G	A	G	A	-0.0729231	0.011131	0.568222	0.361469	FALSE	FALSE	FALSE	116704839	0.651237	0.0246236	reported	textfile	11	116575555	0.0164057	8.79002e-06	7738	TRUE	reported	textfile	0.00254686	19.7528	21.0006
	rs1263149	G	A	G	A	-0.0818545	0.0410722	0.476159	0.437173	FALSE	FALSE	FALSE	116769225	0.0842015	0.023785	reported	textfile	11	116639941	0.0163435	5.48921e-07	7738	TRUE	reported	textfile	0.00323118	25.0774	21.0006
	rs1263151	T	C	T	C	0.0793387	0.00964704	0.517834	0.585551	FALSE	FALSE	FALSE	116770312	0.686777	0.0239243	reported	textfile	11	116641028	0.0162746	1.08815e-06	7738	TRUE	reported	textfile	0.00306189	23.7595	21.0006
	rs1268832	G	T	A	T	-0.0741877	-0.138438	0.569688	0.000399657	TRUE	FALSE	FALSE	116704513	0.813516	0.586869	reported	textfile	11	116575229	0.0164083	6.14427e-06	7738	TRUE	reported	textfile	0.00263489	20.4373	21.0006
	rs12900343	A	T	A	T	0.0993484	-0.0104905	0.157044	0.209953	FALSE	TRUE	FALSE	58731507	0.717251	0.0289684	reported	textfile	15	59023706	0.022142	7.2272e-06	7738	TRUE	reported	textfile	0.00259496	20.1268	21.0006
	rs12905110	T	C	T	C	0.0983167	0.0108874	0.157125	0.790048	FALSE	FALSE	FALSE	58713614	0.70697	0.0289614	reported	textfile	15	59005813	0.0221233	8.82877e-06	7738	TRUE	reported	textfile	0.00254577	19.7443	21.0006
	rs12913383	G	T	G	T	0.0918056	0.0292603	0.185382	0.740989	FALSE	FALSE	FALSE	58751587	0.278388	0.0269942	reported	textfile	15	59043786	0.0207743	9.90672e-06	7738	TRUE	reported	textfile	0.00251746	19.5242	21.0006
	rs12917083	G	A	G	A	0.0922595	0.0179179	0.185194	0.780474	FALSE	FALSE	FALSE	58752341	0.53006	0.0285355	reported	textfile	15	59044540	0.0207779	8.98463e-06	7738	TRUE	reported	textfile	0.00254147	19.7109	21.0006
	rs1426652	A	G	A	G	0.0927311	0.0173502	0.185394	0.780254	FALSE	FALSE	FALSE	58764513	0.54295	0.0285197	reported	textfile	15	59056712	0.0207883	8.16808e-06	7738	TRUE	reported	textfile	0.00256489	19.893	21.0006
	rs146068392	G	C	G	C	-0.176286	-0.00261327	0.050432	0.085738	FALSE	TRUE	FALSE	39886837	0.950381	0.0419948	reported	textfile	2	40113977	0.0387331	5.33126e-06	7738	TRUE	reported	textfile	0.00266982	20.709	21.0006
	rs1484839	A	G	A	G	-0.108324	0.0260324	0.159734	0.802164	FALSE	FALSE	FALSE	30542027	0.379567	0.0296262	reported	textfile	1	31014874	0.0239553	6.12759e-06	7738	TRUE	reported	textfile	0.00263555	20.4425	21.0006
	rs1551445	G	A	G	A	0.0920212	0.0145689	0.189513	0.775631	FALSE	FALSE	FALSE	58836359	0.607537	0.0283668	reported	textfile	15	59128558	0.0207747	9.44604e-06	7738	TRUE	reported	textfile	0.00252917	19.6153	21.0006
	rs17301954	G	C	G	C	0.1002	-0.0107884	0.15672	0.210148	FALSE	TRUE	FALSE	58708232	0.709359	0.0289452	reported	textfile	15	59000431	0.0221335	5.98067e-06	7738	TRUE	reported	textfile	0.00264154	20.4891	21.0006
	rs1784106	C	A	C	A	-0.0757391	0.0173346	0.57334	0.356504	FALSE	FALSE	FALSE	116696733	0.482702	0.0246945	reported	textfile	11	116567449	0.0163935	3.83592e-06	7738	TRUE	reported	textfile	0.00275088	21.3395	21.0006
	rs1784126	G	T	G	T	-0.0782758	0.00569563	0.577675	0.34035	FALSE	FALSE	FALSE	116667498	0.81849	0.0248189	reported	textfile	11	116538215	0.0166054	2.43036e-06	7738	TRUE	reported	textfile	0.0028634	22.2149	21.0006
	rs1784127	G	A	G	A	-0.0772256	0.00679726	0.579839	0.340368	FALSE	FALSE	FALSE	116667859	0.784157	0.0248161	reported	textfile	11	116538576	0.0165913	3.24653e-06	7738	TRUE	reported	textfile	0.00279202	21.6596	21.0006
	rs1784128	G	A	G	A	-0.0784955	0.00802869	0.584905	0.339608	FALSE	FALSE	FALSE	116667972	0.746383	0.024825	reported	textfile	11	116538689	0.0166577	2.44985e-06	7738	TRUE	reported	textfile	0.00286145	22.1997	21.0006
	rs1787680	A	T	A	T	0.0748623	0.0116638	0.468155	0.359771	FALSE	TRUE	TRUE	116794060	0.635641	0.0246173	reported	textfile	11	116664776	0.0164197	5.13216e-06	7738	TRUE	reported	textfile	0.00267918	20.7818	21.0006
	rs1787686	G	A	G	A	-0.0848892	0.0349698	0.639114	0.280814	FALSE	FALSE	FALSE	116670755	0.180725	0.0261256	reported	textfile	11	116541472	0.0170251	6.16027e-07	7738	TRUE	reported	textfile	0.00320261	24.855	21.0006
	rs1787688	T	C	T	C	-0.0851709	0.0379997	0.63904	0.2795	FALSE	FALSE	FALSE	116675006	0.146425	0.0261657	reported	textfile	11	116545723	0.0170286	5.6846e-07	7738	TRUE	reported	textfile	0.00322251	25.0099	21.0006
	rs1787689	A	G	A	G	-0.0737781	-0.0124337	0.517721	0.4254	FALSE	FALSE	FALSE	116697666	0.602726	0.0238886	reported	textfile	11	116568382	0.0162542	5.65132e-06	7738	TRUE	reported	textfile	0.00265546	20.5974	21.0006
	rs1787691	G	A	G	A	-0.0737587	-0.0124555	0.517705	0.425403	FALSE	FALSE	FALSE	116697997	0.602089	0.0238887	reported	textfile	11	116568713	0.0162541	5.68264e-06	7738	TRUE	reported	textfile	0.0026541	20.5868	21.0006
	rs1787701	G	C	G	C	-0.0725252	0.00634438	0.512254	0.578749	FALSE	TRUE	TRUE	116693276	0.790639	0.0238975	reported	textfile	11	116563992	0.0162984	8.5937e-06	7738	TRUE	reported	textfile	0.0025524	19.7959	21.0006
	rs1787717	C	T	C	T	-0.0783143	0.00837486	0.587853	0.338664	FALSE	FALSE	FALSE	116682049	0.73607	0.0248466	reported	textfile	11	116552766	0.016699	2.73521e-06	7738	TRUE	reported	textfile	0.00283426	21.9882	21.0006
	rs1789403	T	C	T	C	-0.0834396	0.00623051	0.601518	0.302509	FALSE	FALSE	FALSE	116645789	0.807972	0.0256355	reported	textfile	11	116516506	0.0168193	7.01552e-07	7738	TRUE	reported	textfile	0.00317045	24.6046	21.0006
	rs180322	C	T	C	T	-0.0806625	0.0216484	0.41625	0.500542	FALSE	FALSE	FALSE	116756019	0.358575	0.02358	reported	textfile	11	116626735	0.0165485	1.09189e-06	7738	TRUE	reported	textfile	0.00306102	23.7527	21.0006
	rs180329	A	G	A	G	0.0733611	-0.0189244	0.468613	0.63408	FALSE	FALSE	FALSE	116752242	0.439652	0.0244886	reported	textfile	11	116622958	0.0163295	7.03753e-06	7738	TRUE	reported	textfile	0.00260151	20.1778	21.0006
	rs180339	T	C	T	C	-0.0752982	0.0466571	0.469031	0.444254	FALSE	FALSE	FALSE	116747066	0.0493446	0.0237368	reported	textfile	11	116617782	0.0163668	4.21124e-06	7738	TRUE	reported	textfile	0.00272789	21.1607	21.0006
	rs180340	C	T	C	T	0.072973	-0.0193971	0.469583	0.63402	FALSE	FALSE	FALSE	116745686	0.428272	0.0244867	reported	textfile	11	116616402	0.016317	7.74177e-06	7738	TRUE	reported	textfile	0.00257807	19.9955	21.0006
	rs180344	C	T	C	T	0.072473	-0.0191473	0.469653	0.633986	FALSE	FALSE	FALSE	116742468	0.434233	0.0244861	reported	textfile	11	116613184	0.0163093	8.84382e-06	7738	TRUE	reported	textfile	0.00254534	19.741	21.0006
	rs180346	C	A	C	A	0.0722615	-0.0154967	0.46963	0.634584	FALSE	FALSE	FALSE	116741943	0.526987	0.0244964	reported	textfile	11	116612659	0.0163134	9.4417e-06	7738	TRUE	reported	textfile	0.00252928	19.6161	21.0006
	rs180351	T	C	T	C	0.0726463	-0.0191159	0.471948	0.633948	FALSE	FALSE	FALSE	116736925	0.435193	0.0244971	reported	textfile	11	116607641	0.0163262	8.60003e-06	7738	TRUE	reported	textfile	0.00255222	19.7945	21.0006
	rs180361	T	C	T	C	0.0728844	-0.0166622	0.468709	0.633515	FALSE	FALSE	FALSE	116727933	0.496572	0.024507	reported	textfile	11	116598649	0.0163571	8.35699e-06	7738	TRUE	reported	textfile	0.00255926	19.8493	21.0006
	rs180371	A	G	A	G	0.0748192	0.00684941	0.525264	0.577205	FALSE	FALSE	FALSE	116721487	0.774248	0.0238802	reported	textfile	11	116592203	0.0163265	4.59018e-06	7738	TRUE	reported	textfile	0.00270666	20.9956	21.0006
	rs180375	T	C	T	C	0.0724833	-0.0168588	0.469449	0.632953	FALSE	FALSE	FALSE	116720324	0.491356	0.0244985	reported	textfile	11	116591040	0.0163555	9.34717e-06	7738	TRUE	reported	textfile	0.00253174	19.6352	21.0006
	rs2007634	A	G	A	G	0.0725248	-0.00284403	0.571356	0.295223	FALSE	FALSE	FALSE	139959294	0.912365	0.0258417	reported	textfile	3	139678136	0.0163421	9.08343e-06	7738	TRUE	reported	textfile	0.00253878	19.69	21.0006
	rs2013098	C	T	C	T	0.0918569	0.0179488	0.190519	0.775696	FALSE	FALSE	FALSE	58804600	0.525882	0.0282968	reported	textfile	15	59096799	0.020617	8.37394e-06	7738	TRUE	reported	textfile	0.00255877	19.8454	21.0006
	rs2107539	T	C	T	C	-0.0987344	-0.000199973	0.243451	0.746597	FALSE	FALSE	FALSE	35995574	0.994151	0.0272812	reported	textfile	17	34322610	0.0219817	7.06708e-06	7738	TRUE	reported	textfile	0.00260049	20.1698	21.0006
	rs2414608	G	A	G	A	0.0993354	0.0102138	0.157041	0.789882	FALSE	FALSE	FALSE	58731413	0.724226	0.0289493	reported	textfile	15	59023612	0.0221423	7.2497e-06	7738	TRUE	reported	textfile	0.00259421	20.121	21.0006
	rs28394222	T	C	T	C	0.0921148	0.0160095	0.190477	0.775813	FALSE	FALSE	FALSE	58804958	0.571755	0.0283119	reported	textfile	15	59097157	0.0206223	7.94145e-06	7738	TRUE	reported	textfile	0.0025718	19.9468	21.0006
	rs28412567	A	T	A	T	0.0916562	-0.0178892	0.190619	0.224706	FALSE	TRUE	FALSE	58810014	0.526787	0.0282647	reported	textfile	15	59102213	0.02062	8.78861e-06	7738	TRUE	reported	textfile	0.00254689	19.753	21.0006
	rs28470809	C	T	C	T	0.0996912	0.00969247	0.157134	0.789703	FALSE	FALSE	FALSE	58744059	0.737746	0.0289466	reported	textfile	15	59036258	0.0221337	6.66699e-06	7738	TRUE	reported	textfile	0.00261481	20.2812	21.0006
	rs28470867	T	C	T	C	0.0918706	0.0177636	0.190443	0.775305	FALSE	FALSE	FALSE	58792434	0.52972	0.0282664	reported	textfile	15	59084633	0.0206123	8.30845e-06	7738	TRUE	reported	textfile	0.0025607	19.8604	21.0006
	rs28489732	T	A	T	A	0.0999216	-0.0105488	0.15686	0.21008	FALSE	TRUE	FALSE	58721154	0.71554	0.0289464	reported	textfile	15	59013353	0.022132	6.33768e-06	7738	TRUE	reported	textfile	0.00262728	20.3782	21.0006
	rs2849179	T	C	T	C	0.0723685	-0.019393	0.469353	0.634018	FALSE	FALSE	FALSE	116750080	0.42837	0.0244865	reported	textfile	11	116620796	0.016319	9.22423e-06	7738	TRUE	reported	textfile	0.00253502	19.6607	21.0006
	rs28510910	A	G	A	G	0.0920419	0.0177627	0.190346	0.775305	FALSE	FALSE	FALSE	58790188	0.52974	0.0282664	reported	textfile	15	59082387	0.0206172	8.03193e-06	7738	TRUE	reported	textfile	0.00256901	19.9251	21.0006
	rs28536555	G	C	G	C	0.099846	-0.00886687	0.156672	0.209866	FALSE	TRUE	FALSE	58730403	0.759497	0.0289633	reported	textfile	15	59022602	0.0221671	6.66132e-06	7738	TRUE	reported	textfile	0.00261504	20.283	21.0006
	rs28549001	A	G	A	G	0.0995078	0.0105447	0.156918	0.789921	FALSE	FALSE	FALSE	58721969	0.715647	0.0289464	reported	textfile	15	59014168	0.0221249	6.87401e-06	7738	TRUE	reported	textfile	0.00260729	20.2227	21.0006
	rs28733370	G	C	G	C	0.0950438	-0.0156586	0.192839	0.226892	FALSE	TRUE	FALSE	58779385	0.578332	0.0281718	reported	textfile	15	59071584	0.020597	3.9413e-06	7738	TRUE	reported	textfile	0.00274421	21.2876	21.0006
	rs28793354	G	A	G	A	0.0917556	0.0177636	0.190395	0.775305	FALSE	FALSE	FALSE	58792647	0.52972	0.0282664	reported	textfile	15	59084846	0.0206131	8.53395e-06	7738	TRUE	reported	textfile	0.00255411	19.8092	21.0006
	rs28818840	T	A	T	A	0.0997123	-0.00901719	0.156792	0.209601	FALSE	TRUE	FALSE	58727115	0.755729	0.0289853	reported	textfile	15	59019314	0.0221423	6.69237e-06	7738	TRUE	reported	textfile	0.00261389	20.274	21.0006
	rs28876251	T	C	T	C	0.0924209	0.0187136	0.190067	0.775173	FALSE	FALSE	FALSE	58819121	0.507914	0.0282645	reported	textfile	15	59111320	0.0207429	8.36835e-06	7738	TRUE	reported	textfile	0.00255894	19.8467	21.0006
	rs28889637	A	G	A	G	0.0923747	0.0184155	0.190089	0.775375	FALSE	FALSE	FALSE	58817580	0.514734	0.0282671	reported	textfile	15	59109779	0.0207405	8.43529e-06	7738	TRUE	reported	textfile	0.00255698	19.8315	21.0006
	rs3016357	C	T	C	T	-0.0874932	0.0371807	0.637843	0.279802	FALSE	FALSE	FALSE	116684699	0.155384	0.0261694	reported	textfile	11	116555415	0.0170242	2.75689e-07	7738	TRUE	reported	textfile	0.00340178	26.406	21.0006
	rs3741301	C	T	C	T	0.0721296	-0.015632	0.469437	0.634623	FALSE	FALSE	FALSE	116760675	0.523385	0.0244964	reported	textfile	11	116631391	0.0163248	9.94329e-06	7738	TRUE	reported	textfile	0.00251657	19.5173	21.0006
	rs492257	G	A	G	A	-0.0881429	0.0306369	0.642236	0.27558	FALSE	FALSE	FALSE	116657532	0.244477	0.0263233	reported	textfile	11	116528249	0.0172673	3.31482e-07	7738	TRUE	reported	textfile	0.00335612	26.0503	21.0006
	rs523518	G	A	G	A	-0.0825454	0.000939394	0.590463	0.33445	FALSE	FALSE	FALSE	116658807	0.96995	0.0249368	reported	textfile	11	116529524	0.0167181	7.91316e-07	7738	TRUE	reported	textfile	0.00314063	24.3725	21.0006
	rs530053	A	G	A	G	-0.076647	-0.00121673	0.621024	0.427788	FALSE	FALSE	FALSE	116659534	0.959403	0.0239029	reported	textfile	11	116530251	0.0168966	5.72691e-06	7738	TRUE	reported	textfile	0.00265222	20.5721	21.0006
	rs545108	G	C	G	C	-0.0773785	-0.0210867	0.539507	0.649479	FALSE	TRUE	TRUE	116654512	0.393546	0.0247147	reported	textfile	11	116525229	0.0163653	2.26522e-06	7738	TRUE	reported	textfile	0.00288079	22.3501	21.0006
	rs552657	C	T	C	T	-0.0879885	0.032407	0.643199	0.274573	FALSE	FALSE	FALSE	116659492	0.218738	0.0263494	reported	textfile	11	116530209	0.0171377	2.83348e-07	7738	TRUE	reported	textfile	0.00339501	26.3533	21.0006
	rs552787	A	C	A	C	-0.0880492	0.0327436	0.643558	0.274504	FALSE	FALSE	FALSE	116659656	0.214024	0.0263514	reported	textfile	11	116530373	0.0171235	2.71819e-07	7738	TRUE	reported	textfile	0.0034053	26.4334	21.0006
	rs558056	G	T	G	T	-0.0788874	0.00136948	0.620818	0.431399	FALSE	FALSE	FALSE	116660080	0.954261	0.0238763	reported	textfile	11	116530797	0.0168791	2.95849e-06	7738	TRUE	reported	textfile	0.00281491	21.8376	21.0006
	rs603446	T	C	T	C	0.0747009	-0.0119973	0.465508	0.64042	FALSE	FALSE	FALSE	116783719	0.625736	0.024598	reported	textfile	11	116654435	0.0163396	4.83649e-06	7738	TRUE	reported	textfile	0.00269382	20.8957	21.0006
	rs610675	A	T	A	T	-0.0771441	-0.0182105	0.409839	0.463238	FALSE	TRUE	TRUE	116769378	0.441352	0.0236527	reported	textfile	11	116640094	0.0165635	3.20118e-06	7738	TRUE	reported	textfile	0.00279548	21.6865	21.0006
	rs62228654	C	G	C	G	-0.156769	0.032711	0.0668159	0.0977316	FALSE	TRUE	FALSE	44405346	0.418019	0.0403908	reported	textfile	22	44801226	0.0341127	4.3145e-06	7738	TRUE	reported	textfile	0.00272192	21.1143	21.0006
	rs622604	C	T	C	T	-0.0771441	0.018209	0.409839	0.536762	FALSE	FALSE	FALSE	116769346	0.44139	0.0236527	reported	textfile	11	116640062	0.0165635	3.20118e-06	7738	TRUE	reported	textfile	0.00279548	21.6865	21.0006
	rs62350672	T	C	T	C	-0.113597	-0.0708518	0.173836	0.885049	FALSE	FALSE	FALSE	31751155	0.0571992	0.0372554	reported	textfile	5	31751262	0.0253587	7.47756e-06	7738	TRUE	reported	textfile	0.00258658	20.0617	21.0006
	rs623908	G	A	G	A	-0.0766162	0.0184444	0.409535	0.536763	FALSE	FALSE	FALSE	116769652	0.435519	0.0236533	reported	textfile	11	116640368	0.0165599	3.71672e-06	7738	TRUE	reported	textfile	0.00275865	21.4	21.0006
	rs6494034	G	C	G	C	0.0994308	-0.0106305	0.156885	0.210126	FALSE	TRUE	FALSE	58717912	0.713431	0.0289461	reported	textfile	15	59010111	0.0221313	7.03008e-06	7738	TRUE	reported	textfile	0.00260176	20.1797	21.0006
	rs6494038	T	C	T	C	0.098873	0.0205725	0.157215	0.750978	FALSE	FALSE	FALSE	58727925	0.451427	0.0273194	reported	textfile	15	59020124	0.0221177	7.81034e-06	7738	TRUE	reported	textfile	0.00257589	19.9785	21.0006
	rs7023657	A	G	A	G	-0.0812649	0.00170188	0.261857	0.688146	FALSE	FALSE	FALSE	8068400	0.946528	0.0253754	reported	textfile	9	8068400	0.0183784	9.78994e-06	7738	TRUE	reported	textfile	0.00252038	19.5469	21.0006
	rs7163939	A	G	A	G	0.0997004	0.011148	0.156817	0.789971	FALSE	FALSE	FALSE	58707956	0.70024	0.0289561	reported	textfile	15	59000155	0.0221244	6.59508e-06	7738	TRUE	reported	textfile	0.00261748	20.302	21.0006
	rs7165019	C	T	C	T	0.093391	0.0178074	0.190049	0.775286	FALSE	FALSE	FALSE	58780098	0.528704	0.0282664	reported	textfile	15	59072297	0.0206077	5.84723e-06	7738	TRUE	reported	textfile	0.0026471	20.5324	21.0006
	rs7168825	C	G	C	G	0.0932675	-0.0178074	0.190027	0.224714	FALSE	TRUE	FALSE	58780329	0.528704	0.0282664	reported	textfile	15	59072528	0.0206116	6.03949e-06	7738	TRUE	reported	textfile	0.00263913	20.4703	21.0006
	rs7169796	C	T	C	T	0.0933174	0.0178074	0.190039	0.775286	FALSE	FALSE	FALSE	58780292	0.528704	0.0282664	reported	textfile	15	59072491	0.0206073	5.94429e-06	7738	TRUE	reported	textfile	0.00264305	20.5008	21.0006
	rs7171482	T	G	T	G	0.0919289	0.0288483	0.19052	0.73582	FALSE	FALSE	FALSE	58814296	0.281512	0.0267875	reported	textfile	15	59106495	0.0207371	9.29031e-06	7738	TRUE	reported	textfile	0.00253325	19.647	21.0006
	rs7992262	C	T	C	T	0.0771638	-0.0633043	0.503285	0.512291	FALSE	FALSE	FALSE	26998068	0.00720228	0.0235565	reported	textfile	13	27572205	0.0167493	4.08536e-06	7738	TRUE	reported	textfile	0.00273537	21.2188	21.0006
	rs8029805	C	T	C	T	0.0991676	0.0108746	0.156927	0.789813	FALSE	FALSE	FALSE	58713723	0.707147	0.0289456	reported	textfile	15	59005922	0.022135	7.45968e-06	7738	TRUE	reported	textfile	0.00258718	20.0663	21.0006
	rs8033691	G	T	G	T	0.0988963	0.00934614	0.158052	0.78957	FALSE	FALSE	FALSE	58711112	0.746693	0.0289352	reported	textfile	15	59003311	0.0220804	7.50205e-06	7738	TRUE	reported	textfile	0.00258579	20.0555	21.0006
	rs875027	G	C	G	C	0.0723105	0.00297752	0.570976	0.704784	FALSE	TRUE	TRUE	139958197	0.908272	0.0258423	reported	textfile	3	139677039	0.0163567	9.83105e-06	7738	TRUE	reported	textfile	0.00251934	19.5389	21.0006
	rs918143	T	C	T	C	0.071993	-0.0192361	0.471957	0.63399	FALSE	FALSE	FALSE	116759884	0.432116	0.0244865	reported	textfile	11	116630600	0.0162874	9.86302e-06	7738	TRUE	reported	textfile	0.00251856	19.5328	21.0006
	rs918144	T	C	T	C	-0.077047	0.0459928	0.470798	0.444233	FALSE	FALSE	FALSE	116763109	0.0526441	0.0237342	reported	textfile	11	116633825	0.0163661	2.50496e-06	7738	TRUE	reported	textfile	0.00285595	22.1569	21.0006
	rs943781	T	C	T	C	0.083589	-0.0487993	0.449683	0.558305	FALSE	FALSE	FALSE	26993959	0.0411775	0.0239008	reported	textfile	13	27568096	0.0169924	8.6894e-07	7738	TRUE	reported	textfile	0.00311748	24.1923	21.0006
	rs947986	G	A	G	A	-0.0722796	0.0152302	0.573662	0.354727	FALSE	FALSE	FALSE	116698488	0.537644	0.0247092	reported	textfile	11	116569204	0.0163364	9.66919e-06	7738	TRUE	reported	textfile	0.00252344	19.5707	21.0006
	rs981881	G	T	G	T	-0.07446	-0.0111858	0.371793	0.654909	FALSE	FALSE	FALSE	9783822	0.651693	0.0247797	reported	textfile	16	9877679	0.016842	9.82087e-06	7738	TRUE	reported	textfile	0.00251962	19.541	21.0006
GCST90027454	rs1032506	G	A	G	A	-0.119164	-0.0378133	0.0975532	0.929491	FALSE	FALSE	FALSE	84862061	0.405081	0.045417	reported	textfile	3	84911212	0.026965	9.90604e-06	7738	TRUE	reported	textfile	0.00251748	19.5244	20.5792
	rs10831658	A	G	A	G	-0.0951081	-0.0336083	0.207259	0.747295	FALSE	FALSE	FALSE	2258142	0.21685	0.0272143	reported	textfile	11	2279372	0.0199996	1.97952e-06	7738	TRUE	reported	textfile	0.00291405	22.6089	20.5792
	rs111576926	C	T	C	T	-0.130953	-0.0179738	0.0860024	0.922606	FALSE	FALSE	FALSE	968938	0.682436	0.0439304	reported	textfile	16	1018938	0.0289017	5.87111e-06	7738	TRUE	reported	textfile	0.00264609	20.5245	20.5792
	rs111805156	C	T	C	T	-0.138238	-0.00609591	0.0864945	0.916394	FALSE	FALSE	FALSE	982616	0.885312	0.0422628	reported	textfile	16	1032616	0.0289022	1.72747e-06	7738	TRUE	reported	textfile	0.00294769	22.8708	20.5792
	rs111980103	T	C	T	C	-0.126648	-0.0282998	0.0909971	0.915644	FALSE	FALSE	FALSE	970874	0.502744	0.0422273	reported	textfile	16	1020874	0.0283305	7.80746e-06	7738	TRUE	reported	textfile	0.00257596	19.9791	20.5792
	rs112029446	T	C	T	C	-0.129308	-0.00237245	0.0868634	0.914783	FALSE	FALSE	FALSE	940631	0.954827	0.0418818	reported	textfile	16	990631	0.0284903	5.66161e-06	7738	TRUE	reported	textfile	0.00265505	20.5942	20.5792
	rs112090782	C	T	C	T	-0.131998	-0.00254389	0.0865956	0.914796	FALSE	FALSE	FALSE	959709	0.95157	0.041885	reported	textfile	16	1009709	0.0285411	3.74887e-06	7738	TRUE	reported	textfile	0.00275655	21.3836	20.5792
	rs112146294	T	C	T	C	-0.128443	-0.00237432	0.087019	0.914783	FALSE	FALSE	FALSE	939564	0.954791	0.0418817	reported	textfile	16	989564	0.0284925	6.54576e-06	7738	TRUE	reported	textfile	0.00261934	20.3164	20.5792
	rs112258597	A	G	A	G	-0.127053	-0.00829061	0.0938194	0.906456	FALSE	FALSE	FALSE	944716	0.836454	0.0401615	reported	textfile	16	994716	0.0275029	3.84477e-06	7738	TRUE	reported	textfile	0.00275035	21.3354	20.5792
	rs112373040	T	C	T	C	-0.130333	-0.0179736	0.0862317	0.922606	FALSE	FALSE	FALSE	969207	0.682438	0.0439304	reported	textfile	16	1019207	0.0288526	6.26628e-06	7738	TRUE	reported	textfile	0.00263006	20.3998	20.5792
	rs112429167	A	G	A	G	-0.129029	-0.00236776	0.0868505	0.914783	FALSE	FALSE	FALSE	941367	0.954916	0.0418818	reported	textfile	16	991367	0.028491	5.93253e-06	7738	TRUE	reported	textfile	0.00264351	20.5044	20.5792
	rs112866363	C	T	C	T	-0.129029	-0.00235637	0.0868505	0.914783	FALSE	FALSE	FALSE	947174	0.955133	0.0418818	reported	textfile	16	997174	0.028491	5.93253e-06	7738	TRUE	reported	textfile	0.00264351	20.5044	20.5792
	rs113168528	C	T	C	T	-0.13292	-0.00370259	0.0865984	0.91481	FALSE	FALSE	FALSE	963624	0.929568	0.0418901	reported	textfile	16	1013624	0.028529	3.1757e-06	7738	TRUE	reported	textfile	0.00279745	21.7018	20.5792
	rs113289307	C	T	C	T	-0.129029	-0.00235958	0.0868505	0.914783	FALSE	FALSE	FALSE	943871	0.955072	0.0418818	reported	textfile	16	993871	0.028491	5.93253e-06	7738	TRUE	reported	textfile	0.00264351	20.5044	20.5792
	rs113689626	T	C	T	C	-0.130273	-0.0179737	0.0861638	0.922606	FALSE	FALSE	FALSE	968034	0.682436	0.0439304	reported	textfile	16	1018034	0.0288493	6.31204e-06	7738	TRUE	reported	textfile	0.00262825	20.3857	20.5792
	rs113860397	T	C	T	C	-0.129029	-0.00243827	0.0868505	0.914839	FALSE	FALSE	FALSE	944230	0.953598	0.0419028	reported	textfile	16	994230	0.028491	5.93253e-06	7738	TRUE	reported	textfile	0.00264351	20.5044	20.5792
	rs113896668	A	C	A	C	-0.134839	-0.00388549	0.086723	0.914813	FALSE	FALSE	FALSE	964070	0.926101	0.0418912	reported	textfile	16	1014070	0.028742	2.71394e-06	7738	TRUE	reported	textfile	0.00283619	22.0031	20.5792
	rs113961535	T	G	T	G	-0.130118	-0.0179723	0.0861866	0.922606	FALSE	FALSE	FALSE	969455	0.68246	0.0439304	reported	textfile	16	1019455	0.028861	6.53055e-06	7738	TRUE	reported	textfile	0.0026199	20.3208	20.5792
	rs114936182	T	C	T	C	-0.129763	-0.0182015	0.0863743	0.922621	FALSE	FALSE	FALSE	972956	0.678689	0.0439381	reported	textfile	16	1022956	0.0288934	7.08517e-06	7738	TRUE	reported	textfile	0.00259983	20.1647	20.5792
	rs116370314	C	T	C	T	-0.137615	-0.0179716	0.0885513	0.912859	FALSE	FALSE	FALSE	979361	0.665527	0.0415724	reported	textfile	16	1029361	0.0286769	1.59603e-06	7738	TRUE	reported	textfile	0.00296721	23.0226	20.5792
	rs116977600	C	G	C	G	-0.127534	0.0164511	0.0859198	0.0774126	FALSE	TRUE	FALSE	959363	0.708016	0.0439255	reported	textfile	16	1009363	0.028654	8.55382e-06	7738	TRUE	reported	textfile	0.00255354	19.8047	20.5792
	rs116991096	A	G	A	G	-0.138313	-0.00609518	0.0864846	0.916393	FALSE	FALSE	FALSE	983063	0.885327	0.0422633	reported	textfile	16	1033063	0.0289053	1.7097e-06	7738	TRUE	reported	textfile	0.00295025	22.8907	20.5792
	rs117214899	T	G	T	G	-0.128139	-0.00236612	0.0870958	0.914782	FALSE	FALSE	FALSE	938222	0.954948	0.0418821	reported	textfile	16	988222	0.028485	6.84495e-06	7738	TRUE	reported	textfile	0.00260836	20.231	20.5792
	rs117300263	A	G	A	G	-0.169358	-0.00817032	0.0564102	0.956029	FALSE	FALSE	FALSE	71854951	0.887433	0.0577189	reported	textfile	9	74469867	0.0374003	5.94771e-06	7738	TRUE	reported	textfile	0.00264292	20.4998	20.5792
	rs117666374	G	A	G	A	-0.127088	-0.00829565	0.0938227	0.906448	FALSE	FALSE	FALSE	940115	0.836355	0.0401612	reported	textfile	16	990115	0.0275021	3.81865e-06	7738	TRUE	reported	textfile	0.00275202	21.3484	20.5792
	rs117743987	T	C	T	C	-0.138335	-0.00629994	0.0864585	0.916409	FALSE	FALSE	FALSE	982915	0.881522	0.0422701	reported	textfile	16	1032915	0.0289077	1.70648e-06	7738	TRUE	reported	textfile	0.0029507	22.8942	20.5792
	rs117760014	T	C	T	C	-0.131012	-0.0185223	0.0864706	0.922702	FALSE	FALSE	FALSE	970363	0.673676	0.0439847	reported	textfile	16	1020363	0.0288223	5.4805e-06	7738	TRUE	reported	textfile	0.00266304	20.6563	20.5792
	rs117827345	A	G	A	G	-0.12995	-0.0179739	0.0861569	0.922606	FALSE	FALSE	FALSE	967983	0.682433	0.0439304	reported	textfile	16	1017983	0.028848	6.6486e-06	7738	TRUE	reported	textfile	0.0026155	20.2866	20.5792
	rs117870804	T	C	T	C	-0.130287	-0.0182013	0.0863026	0.922621	FALSE	FALSE	FALSE	973691	0.678692	0.0439381	reported	textfile	16	1023691	0.0288927	6.50264e-06	7738	TRUE	reported	textfile	0.00262094	20.3289	20.5792
	rs118137891	T	C	T	C	-0.135003	-0.00238884	0.0834494	0.914786	FALSE	FALSE	FALSE	955605	0.954516	0.0418828	reported	textfile	16	1005605	0.0296153	5.15039e-06	7738	TRUE	reported	textfile	0.00267831	20.7751	20.5792
	rs118173236	T	C	T	C	-0.128794	-0.00466915	0.0969258	0.909602	FALSE	FALSE	FALSE	919918	0.908896	0.040803	reported	textfile	16	969918	0.0280491	4.39542e-06	7738	TRUE	reported	textfile	0.00271733	21.0786	20.5792
	rs12495388	G	A	G	A	-0.121458	-0.0380443	0.097635	0.929512	FALSE	FALSE	FALSE	84877321	0.40248	0.0454422	reported	textfile	3	84926472	0.0269091	6.3725e-06	7738	TRUE	reported	textfile	0.00262593	20.3677	20.5792
	rs12859492	C	T	C	T	0.0778751	0.0310195	0.30745	0.672175	FALSE	FALSE	FALSE	71331420	0.218321	0.0251985	reported	textfile	13	71905552	0.0175564	9.17741e-06	7738	TRUE	reported	textfile	0.00253627	19.6704	20.5792
	rs12949143	C	T	C	T	0.078265	0.00470328	0.33851	0.699824	FALSE	FALSE	FALSE	9465611	0.854866	0.0257132	reported	textfile	17	9368928	0.0176759	9.52072e-06	7738	TRUE	reported	textfile	0.00252723	19.6002	20.5792
	rs141267389	C	G	C	G	-0.132136	0.00756199	0.0866019	0.0847759	FALSE	TRUE	FALSE	962258	0.857127	0.0420035	reported	textfile	16	1012258	0.0285421	3.66547e-06	7738	TRUE	reported	textfile	0.00276211	21.4268	20.5792
	rs141737799	A	G	A	G	-0.12916	-0.00369939	0.0870603	0.913998	FALSE	FALSE	FALSE	942717	0.92962	0.0418849	reported	textfile	16	992717	0.0284599	5.67074e-06	7738	TRUE	reported	textfile	0.00265464	20.591	20.5792
	rs143872627	T	C	T	C	-0.12863	-0.00236833	0.0869377	0.914783	FALSE	FALSE	FALSE	941294	0.954905	0.0418818	reported	textfile	16	991294	0.0284933	6.3498e-06	7738	TRUE	reported	textfile	0.00262681	20.3745	20.5792
	rs146236523	A	G	A	G	-0.127053	-0.00830782	0.0938194	0.906456	FALSE	FALSE	FALSE	943101	0.83612	0.0401617	reported	textfile	16	993101	0.0275029	3.84477e-06	7738	TRUE	reported	textfile	0.00275035	21.3354	20.5792
	rs146615088	T	C	T	C	-0.136749	-0.00349347	0.0768431	0.918495	FALSE	FALSE	FALSE	915517	0.934974	0.0428186	reported	textfile	16	965517	0.0308113	9.06839e-06	7738	TRUE	reported	textfile	0.00253919	19.6932	20.5792
	rs149069845	T	C	T	C	-0.138238	-0.00628217	0.0864945	0.91641	FALSE	FALSE	FALSE	982695	0.881853	0.0422698	reported	textfile	16	1032695	0.0289022	1.72747e-06	7738	TRUE	reported	textfile	0.00294769	22.8708	20.5792
	rs1941024	A	G	A	G	-0.0737051	0.00693599	0.597554	0.409772	FALSE	FALSE	FALSE	60508467	0.772328	0.0239726	reported	textfile	11	60275940	0.0166612	9.69951e-06	7738	TRUE	reported	textfile	0.00252265	19.5646	20.5792
	rs2305924	A	G	A	G	0.0820462	0.0142556	0.299996	0.720376	FALSE	FALSE	FALSE	9469125	0.58723	0.0262604	reported	textfile	17	9372442	0.0184952	9.16073e-06	7738	TRUE	reported	textfile	0.00253669	19.6737	20.5792
	rs2509667	A	C	A	C	-0.116273	-0.111597	0.120838	0.868327	FALSE	FALSE	FALSE	119490512	0.000907382	0.033636	reported	textfile	11	119361224	0.0253157	4.37119e-06	7738	TRUE	reported	textfile	0.00271873	21.0895	20.5792
	rs28652862	A	G	A	G	-0.1116	0.0220871	0.115383	0.850781	FALSE	FALSE	FALSE	958647	0.505565	0.0331758	reported	textfile	16	1008647	0.0252	9.48593e-06	7738	TRUE	reported	textfile	0.00252813	19.6072	20.5792
	rs286908	A	G	A	G	-0.0787738	-0.0413257	0.293164	0.691465	FALSE	FALSE	FALSE	34637310	0.106936	0.0256344	reported	textfile	11	34658857	0.0174903	6.67283e-06	7738	TRUE	reported	textfile	0.00261459	20.2795	20.5792
	rs3925547	C	T	C	T	-0.119164	-0.0380958	0.0975532	0.929496	FALSE	FALSE	FALSE	84861962	0.401694	0.0454278	reported	textfile	3	84911113	0.026965	9.90604e-06	7738	TRUE	reported	textfile	0.00251748	19.5244	20.5792
	rs4410076	G	T	G	T	-0.129864	-0.0179744	0.0861379	0.922606	FALSE	FALSE	FALSE	968189	0.682425	0.0439304	reported	textfile	16	1018189	0.0288473	6.73876e-06	7738	TRUE	reported	textfile	0.00261218	20.2607	20.5792
	rs58563096	C	G	C	G	-0.136396	0.00585064	0.082934	0.0850978	FALSE	TRUE	FALSE	901388	0.88908	0.0419495	reported	textfile	16	951388	0.0296498	4.22007e-06	7738	TRUE	reported	textfile	0.00272738	21.1567	20.5792
	rs59020951	T	C	T	C	-0.139061	-0.004643	0.0766464	0.918311	FALSE	FALSE	FALSE	911924	0.913567	0.0427767	reported	textfile	16	961924	0.0310144	7.33432e-06	7738	TRUE	reported	textfile	0.00259136	20.0989	20.5792
	rs60949950	A	G	A	G	-0.125416	-0.00268674	0.0889187	0.91476	FALSE	FALSE	FALSE	920803	0.948792	0.041834	reported	textfile	16	970803	0.0283607	9.7708e-06	7738	TRUE	reported	textfile	0.00252085	19.5506	20.5792
	rs7189998	A	C	A	C	-0.127627	-0.0179137	0.0864808	0.922617	FALSE	FALSE	FALSE	972502	0.683483	0.0439371	reported	textfile	16	1022502	0.028887	9.95543e-06	7738	TRUE	reported	textfile	0.00251627	19.515	20.5792
	rs7251031	G	T	G	T	-0.0801886	-0.0505915	0.308219	0.730845	FALSE	FALSE	FALSE	11156017	0.0564235	0.026519	reported	textfile	19	11266693	0.0173897	4.00203e-06	7738	TRUE	reported	textfile	0.00274044	21.2583	20.5792
	rs72769435	G	C	G	C	-0.120964	0.025925	0.0991732	0.0862699	FALSE	TRUE	FALSE	966475	0.535184	0.0418069	reported	textfile	16	1016475	0.0271069	8.1014e-06	7738	TRUE	reported	textfile	0.00256689	19.9086	20.5792
	rs72769438	C	T	C	T	-0.121162	-0.0259152	0.0992601	0.913731	FALSE	FALSE	FALSE	967982	0.535338	0.041807	reported	textfile	16	1017982	0.0270985	7.77929e-06	7738	TRUE	reported	textfile	0.00257687	19.9862	20.5792
	rs73497294	A	G	A	G	-0.138062	-0.0136528	0.0770205	0.916749	FALSE	FALSE	FALSE	914417	0.748157	0.0425228	reported	textfile	16	964417	0.0308087	7.41976e-06	7738	TRUE	reported	textfile	0.00258849	20.0766	20.5792
	rs73499209	T	C	T	C	-0.125992	-0.00378102	0.0889215	0.914798	FALSE	FALSE	FALSE	919885	0.928036	0.0418641	reported	textfile	16	969885	0.02838	9.0182e-06	7738	TRUE	reported	textfile	0.00254055	19.7038	20.5792
	rs73499213	C	T	C	T	-0.125416	-0.00389729	0.0889187	0.914866	FALSE	FALSE	FALSE	921343	0.925896	0.0419019	reported	textfile	16	971343	0.0283607	9.7708e-06	7738	TRUE	reported	textfile	0.00252085	19.5506	20.5792
	rs73499215	A	G	A	G	-0.125313	-0.00372619	0.0889283	0.914833	FALSE	FALSE	FALSE	921383	0.929106	0.0418814	reported	textfile	16	971383	0.0283611	9.93917e-06	7738	TRUE	reported	textfile	0.00251665	19.5179	20.5792
	rs74439542	C	G	C	G	-0.119445	0.0380965	0.0975317	0.0705044	FALSE	TRUE	FALSE	84878514	0.401688	0.0454281	reported	textfile	3	84927665	0.0269217	9.13251e-06	7738	TRUE	reported	textfile	0.00253746	19.6797	20.5792
	rs75317969	C	G	C	G	-0.119745	0.0380958	0.0977503	0.0705043	FALSE	TRUE	FALSE	84860491	0.401694	0.0454278	reported	textfile	3	84909642	0.0269457	8.83304e-06	7738	TRUE	reported	textfile	0.00254566	19.7435	20.5792
	rs75870327	G	T	G	T	-0.12715	-0.00829016	0.0938422	0.906456	FALSE	FALSE	FALSE	945783	0.836462	0.0401615	reported	textfile	16	995783	0.027504	3.78329e-06	7738	TRUE	reported	textfile	0.00275432	21.3663	20.5792
	rs76124263	G	T	G	T	-0.119745	-0.0380958	0.0977503	0.929496	FALSE	FALSE	FALSE	84860536	0.401694	0.0454278	reported	textfile	3	84909687	0.0269457	8.83304e-06	7738	TRUE	reported	textfile	0.00254566	19.7435	20.5792
	rs76240106	C	A	C	A	-0.119745	-0.0380958	0.0977503	0.929496	FALSE	FALSE	FALSE	84861768	0.401694	0.0454278	reported	textfile	3	84910919	0.0269457	8.83304e-06	7738	TRUE	reported	textfile	0.00254566	19.7435	20.5792
	rs76338497	T	C	T	C	-0.138431	-0.00463586	0.0762854	0.918314	FALSE	FALSE	FALSE	901682	0.913698	0.0427759	reported	textfile	16	951682	0.0310474	8.24556e-06	7738	TRUE	reported	textfile	0.00256255	19.8749	20.5792
	rs76344849	C	G	C	G	-0.120919	0.0380958	0.097725	0.0705043	FALSE	TRUE	FALSE	84858900	0.401694	0.0454278	reported	textfile	3	84908051	0.0269568	7.26909e-06	7738	TRUE	reported	textfile	0.00259356	20.1159	20.5792
	rs78157212	T	C	T	C	-0.119745	-0.0380699	0.0977503	0.929492	FALSE	FALSE	FALSE	84861577	0.402015	0.0454279	reported	textfile	3	84910728	0.0269457	8.83304e-06	7738	TRUE	reported	textfile	0.00254566	19.7435	20.5792
	rs78355395	T	C	T	C	-0.12081	-0.0380958	0.0977384	0.929496	FALSE	FALSE	FALSE	84857709	0.401694	0.0454278	reported	textfile	3	84906860	0.0269615	7.4355e-06	7738	TRUE	reported	textfile	0.002588	20.0727	20.5792
	rs80206092	C	T	C	T	-0.119619	-0.0380958	0.09776	0.929496	FALSE	FALSE	FALSE	84864073	0.401694	0.0454278	reported	textfile	3	84913224	0.0269461	9.0288e-06	7738	TRUE	reported	textfile	0.00254024	19.7014	20.5792
	rs8067677	A	G	A	G	0.0858815	0.0141256	0.299483	0.719067	FALSE	FALSE	FALSE	9460546	0.590058	0.0262191	reported	textfile	17	9363863	0.0182785	2.6209e-06	7738	TRUE	reported	textfile	0.0028448	22.0702	20.5792
	rs9599845	C	T	C	T	0.0961761	0.0190505	0.237425	0.802329	FALSE	FALSE	FALSE	71403998	0.518997	0.0295407	reported	textfile	13	71978130	0.0202786	2.10839e-06	7738	TRUE	reported	textfile	0.00289847	22.4878	20.5792
GCST90027455	rs10006164	A	G	A	G	-0.0869582	-0.00166953	0.344145	0.618057	FALSE	FALSE	FALSE	1027810	0.945737	0.0245299	reported	textfile	4	1021598	0.0177564	9.71673e-07	7738	TRUE	reported	textfile	0.00308986	23.9772	22.1019
	rs10779615	G	C	G	C	-0.0774468	-0.015589	0.508273	0.53002	FALSE	TRUE	TRUE	214423091	0.509378	0.0236266	reported	textfile	1	214596434	0.0165606	2.91716e-06	7738	TRUE	reported	textfile	0.00281839	21.8647	22.1019
	rs11171842	A	G	A	G	-0.132136	-0.0621362	0.0867359	0.928492	FALSE	FALSE	FALSE	56427186	0.168579	0.0451314	reported	textfile	12	56820970	0.0292129	6.09102e-06	7738	TRUE	reported	textfile	0.00263704	20.4541	22.1019
	rs11171846	T	C	T	C	-0.140647	-0.0669846	0.0821696	0.933812	FALSE	FALSE	FALSE	56434272	0.150667	0.0466084	reported	textfile	12	56828056	0.0292656	1.54074e-06	7738	TRUE	reported	textfile	0.00297593	23.0905	22.1019
	rs113200958	A	G	A	G	-0.0776361	0.0181672	0.505561	0.471632	FALSE	FALSE	FALSE	214424266	0.441809	0.0236201	reported	textfile	1	214597609	0.0165883	2.86636e-06	7738	TRUE	reported	textfile	0.00282272	21.8984	22.1019
	rs113614987	T	C	T	C	-0.0779274	0.0181855	0.504175	0.471614	FALSE	FALSE	FALSE	214424243	0.441354	0.0236203	reported	textfile	1	214597586	0.0165933	2.64887e-06	7738	TRUE	reported	textfile	0.00284217	22.0497	22.1019
	rs11678288	A	T	A	T	0.081833	-0.0359446	0.606703	0.574704	FALSE	TRUE	TRUE	65547553	0.132028	0.0238652	reported	textfile	2	65774687	0.0164711	6.75507e-07	7738	TRUE	reported	textfile	0.0031798	24.6774	22.1019
	rs11683117	T	C	T	C	0.0773112	0.0102391	0.599328	0.366832	FALSE	FALSE	FALSE	1378639	0.675269	0.0244412	reported	textfile	2	1382411	0.0171745	6.74761e-06	7738	TRUE	reported	textfile	0.00261187	20.2584	22.1019
	rs12088748	A	G	A	G	-0.0766856	0.0181039	0.506311	0.471646	FALSE	FALSE	FALSE	214423936	0.44338	0.023619	reported	textfile	1	214597279	0.0165585	3.63572e-06	7738	TRUE	reported	textfile	0.00276411	21.4424	22.1019
	rs12128621	A	T	A	T	-0.0796843	0.0212922	0.504393	0.501729	FALSE	TRUE	TRUE	214411174	0.367832	0.0236437	reported	textfile	1	214584517	0.0163727	1.1336e-06	7738	TRUE	reported	textfile	0.00305175	23.6806	22.1019
	rs12135779	A	G	A	G	-0.0754476	0.0107562	0.55158	0.46074	FALSE	FALSE	FALSE	214410396	0.650558	0.0237451	reported	textfile	1	214583739	0.0163728	4.06378e-06	7738	TRUE	reported	textfile	0.00273669	21.2292	22.1019
	rs12646579	C	T	C	T	0.0997108	0.0267514	0.811815	0.237957	FALSE	FALSE	FALSE	111380347	0.336048	0.0278081	reported	textfile	4	112301503	0.0213861	3.12522e-06	7738	TRUE	reported	textfile	0.00280139	21.7325	22.1019
	rs12772838	T	C	T	C	0.168169	-0.0598874	0.0554534	0.957861	FALSE	FALSE	FALSE	125147706	0.317269	0.0598821	reported	textfile	10	126836275	0.0366832	4.55365e-06	7738	TRUE	reported	textfile	0.00270864	21.0109	22.1019
	rs13003991	G	C	G	C	0.0821386	-0.0352521	0.606858	0.573741	FALSE	TRUE	TRUE	65545822	0.139617	0.0238638	reported	textfile	2	65772956	0.0164612	6.04282e-07	7738	TRUE	reported	textfile	0.00320736	24.892	22.1019
	rs1451459	A	G	A	G	0.0838938	0.0259225	0.252245	0.733673	FALSE	FALSE	FALSE	52861274	0.329287	0.0265722	reported	textfile	2	53088412	0.0187222	7.43053e-06	7738	TRUE	reported	textfile	0.00258816	20.074	22.1019
	rs1514681	C	T	C	T	-0.0787943	-0.00217318	0.401121	0.646356	FALSE	FALSE	FALSE	1393272	0.929642	0.0246127	reported	textfile	2	1397044	0.0171089	4.11557e-06	7738	TRUE	reported	textfile	0.00273356	21.2048	22.1019
	rs1673457	A	G	A	G	-0.0802548	-0.0379878	0.37215	0.620122	FALSE	FALSE	FALSE	65544511	0.117758	0.0242849	reported	textfile	2	65771645	0.0166667	1.47004e-06	7738	TRUE	reported	textfile	0.00298755	23.1809	22.1019
	rs1673458	A	T	A	T	-0.0802548	0.0379878	0.37215	0.379878	FALSE	TRUE	FALSE	65544512	0.117758	0.0242849	reported	textfile	2	65771646	0.0166667	1.47004e-06	7738	TRUE	reported	textfile	0.00298755	23.1809	22.1019
	rs1968451	C	T	C	T	0.0887818	0.00394111	0.680629	0.338654	FALSE	FALSE	FALSE	5391911	0.876737	0.0254088	reported	textfile	19	5391922	0.0199045	8.18144e-06	7738	TRUE	reported	textfile	0.00256449	19.8899	22.1019
	rs198133	T	G	T	G	0.138511	0.0410698	0.0772499	0.950553	FALSE	FALSE	FALSE	24203296	0.449279	0.0542807	reported	textfile	16	24214617	0.0313112	9.70309e-06	7738	TRUE	reported	textfile	0.00252257	19.564	22.1019
	rs2430691	C	T	C	T	0.0727985	-0.0462474	0.42366	0.638039	FALSE	FALSE	FALSE	14912817	0.0588952	0.0244827	reported	textfile	12	15065751	0.0164296	9.38231e-06	7738	TRUE	reported	textfile	0.00253082	19.6281	22.1019
	rs2634527	C	T	A	T	-0.0790784	0.196734	0.498378	0.00109991	TRUE	FALSE	FALSE	58586830	0.678703	0.474935	reported	textfile	8	59499389	0.0167644	2.39304e-06	7738	TRUE	reported	textfile	0.00286724	22.2447	22.1019
	rs2654736	A	G	A	G	0.0985757	0.0285017	0.811446	0.23801	FALSE	FALSE	FALSE	111385356	0.305091	0.0277909	reported	textfile	4	112306512	0.0213797	4.01282e-06	7738	TRUE	reported	textfile	0.00273978	21.2532	22.1019
	rs34566098	G	A	G	A	0.17313	-0.0237759	0.0538513	0.956847	FALSE	FALSE	FALSE	125172088	0.688088	0.059225	reported	textfile	10	126860657	0.0381414	5.64794e-06	7738	TRUE	reported	textfile	0.00265563	20.5987	22.1019
	rs4076290	A	G	A	G	0.0773487	0.0103488	0.599988	0.368262	FALSE	FALSE	FALSE	1375197	0.671789	0.0244251	reported	textfile	2	1378969	0.0172404	7.24052e-06	7738	TRUE	reported	textfile	0.0025945	20.1233	22.1019
	rs437545	A	T	A	T	0.139229	-0.041059	0.0771995	0.049452	FALSE	TRUE	FALSE	24200055	0.449442	0.054286	reported	textfile	16	24211376	0.0313643	9.034e-06	7738	TRUE	reported	textfile	0.00254012	19.7004	22.1019
	rs61798186	G	C	G	C	-0.117001	0.048414	0.115166	0.0671139	FALSE	TRUE	FALSE	36431110	0.306463	0.0473407	reported	textfile	4	36432732	0.0263833	9.22083e-06	7738	TRUE	reported	textfile	0.00253507	19.6611	22.1019
	rs61798216	G	A	G	A	-0.118636	-0.0472778	0.113593	0.932886	FALSE	FALSE	FALSE	36457429	0.317773	0.047323	reported	textfile	4	36459051	0.026406	7.03008e-06	7738	TRUE	reported	textfile	0.00260176	20.1797	22.1019
	rs6705904	G	T	G	T	0.0817101	0.0359957	0.607266	0.425319	FALSE	FALSE	FALSE	65542897	0.131497	0.0238663	reported	textfile	2	65770031	0.0164626	6.92787e-07	7738	TRUE	reported	textfile	0.00317355	24.6287	22.1019
	rs702903	G	C	G	C	-0.0798357	0.037075	0.372562	0.379181	FALSE	TRUE	FALSE	65538558	0.127032	0.0242969	reported	textfile	2	65765692	0.0167	1.74787e-06	7738	TRUE	reported	textfile	0.00294477	22.848	22.1019
	rs702904	T	C	T	C	-0.0800017	-0.0375365	0.371875	0.620581	FALSE	FALSE	FALSE	65538960	0.122286	0.0242916	reported	textfile	2	65766094	0.0166971	1.65672e-06	7738	TRUE	reported	textfile	0.00295802	22.9511	22.1019
	rs702905	G	A	G	A	-0.0799547	-0.0367947	0.371923	0.619616	FALSE	FALSE	FALSE	65539054	0.129781	0.0242875	reported	textfile	2	65766188	0.0166966	1.67873e-06	7738	TRUE	reported	textfile	0.00295473	22.9255	22.1019
	rs702906	T	C	T	C	-0.0799824	-0.0382071	0.372331	0.62016	FALSE	FALSE	FALSE	65539745	0.115666	0.0242857	reported	textfile	2	65766879	0.0166893	1.64774e-06	7738	TRUE	reported	textfile	0.00295935	22.9615	22.1019
	rs702909	T	G	T	G	-0.0800088	-0.0383761	0.371994	0.620253	FALSE	FALSE	FALSE	65540113	0.114103	0.0242884	reported	textfile	2	65767247	0.016656	1.55826e-06	7738	TRUE	reported	textfile	0.00297312	23.0686	22.1019
	rs702912	T	G	T	G	-0.0804251	-0.0381333	0.371559	0.620982	FALSE	FALSE	FALSE	65541337	0.11689	0.0243203	reported	textfile	2	65768471	0.0166695	1.4023e-06	7738	TRUE	reported	textfile	0.0029992	23.2716	22.1019
	rs702915	T	C	T	C	-0.0803519	-0.0349377	0.372305	0.620661	FALSE	FALSE	FALSE	65543462	0.150343	0.0242907	reported	textfile	2	65770596	0.0166588	1.4114e-06	7738	TRUE	reported	textfile	0.00299759	23.2591	22.1019
	rs702916	G	A	G	A	-0.0805241	-0.0371849	0.372327	0.61914	FALSE	FALSE	FALSE	65544090	0.125648	0.0242802	reported	textfile	2	65771224	0.0166566	1.33573e-06	7738	TRUE	reported	textfile	0.00301121	23.3651	22.1019
	rs702919	T	C	T	C	-0.0806612	-0.0378018	0.372166	0.620073	FALSE	FALSE	FALSE	65545157	0.119528	0.0242824	reported	textfile	2	65772291	0.0166663	1.29993e-06	7738	TRUE	reported	textfile	0.00301793	23.4174	22.1019
	rs702920	T	C	T	C	-0.0803378	-0.038085	0.37226	0.620464	FALSE	FALSE	FALSE	65546865	0.116922	0.0242916	reported	textfile	2	65773999	0.0166682	1.43678e-06	7738	TRUE	reported	textfile	0.00299317	23.2247	22.1019
	rs702953	A	G	A	G	-0.0804709	-0.0378863	0.372282	0.620003	FALSE	FALSE	FALSE	65542314	0.118813	0.0242896	reported	textfile	2	65769448	0.0166595	1.36308e-06	7738	TRUE	reported	textfile	0.0030062	23.3261	22.1019
	rs74949229	A	G	A	G	-0.136496	-0.039767	0.0937893	0.935586	FALSE	FALSE	FALSE	9484983	0.403759	0.0476294	reported	textfile	10	9526946	0.0283337	1.45412e-06	7738	TRUE	reported	textfile	0.00299023	23.2018	22.1019
	rs75967282	C	G	C	G	-0.178428	-0.0195806	0.0513485	0.141248	FALSE	TRUE	FALSE	61443077	0.567874	0.0342805	reported	textfile	17	59520438	0.0377704	2.31217e-06	7738	TRUE	reported	textfile	0.0028757	22.3106	22.1019
	rs840785	G	A	G	A	-0.0800437	-0.0373023	0.372004	0.619175	FALSE	FALSE	FALSE	65541842	0.124545	0.0242857	reported	textfile	2	65768976	0.0166562	1.54266e-06	7738	TRUE	reported	textfile	0.00297563	23.0882	22.1019
	rs840787	G	C	G	C	-0.0804381	0.0355032	0.372641	0.380918	FALSE	TRUE	FALSE	65548756	0.143819	0.0242887	reported	textfile	2	65775890	0.0166708	1.39946e-06	7738	TRUE	reported	textfile	0.0029997	23.2755	22.1019
	rs9645801	A	G	A	G	-0.188435	-0.0753959	0.0526909	0.917955	FALSE	FALSE	FALSE	56320060	0.0853277	0.0438201	reported	textfile	12	56713844	0.0413889	5.29371e-06	7738	TRUE	reported	textfile	0.00267156	20.7225	22.1019
GCST90027456	rs11834065	C	T	C	T	-0.18395	0.0426331	0.0538401	0.943171	FALSE	FALSE	FALSE	42718856	0.405685	0.0512717	reported	textfile	12	43112658	0.0366235	5.09401e-07	7738	TRUE	reported	textfile	0.00324966	25.2213	25.0559
	rs1396211	A	G	A	G	-0.102964	0.015473	0.219908	0.78354	FALSE	FALSE	FALSE	55522946	0.590043	0.0287188	reported	textfile	17	53600307	0.0217135	2.11665e-06	7738	TRUE	reported	textfile	0.00289749	22.4801	25.0559
	rs1396212	T	C	T	C	-0.120916	0.000841863	0.186799	0.777653	FALSE	FALSE	FALSE	55522710	0.976353	0.0284015	reported	textfile	17	53600071	0.0234319	2.46559e-07	7738	TRUE	reported	textfile	0.00342951	26.622	25.0559
	rs1396213	A	C	A	C	-0.119358	0.00163902	0.182432	0.778683	FALSE	FALSE	FALSE	55522708	0.954085	0.0284662	reported	textfile	17	53600069	0.023743	4.98047e-07	7738	TRUE	reported	textfile	0.00325527	25.265	25.0559
	rs4551833	G	T	G	T	-0.184975	0.0475678	0.0539418	0.945266	FALSE	FALSE	FALSE	42710551	0.359775	0.0519416	reported	textfile	12	43104353	0.0364893	3.99273e-07	7738	TRUE	reported	textfile	0.00330999	25.6911	25.0559
GCST90027457	rs1093520	G	T	G	T	0.179202	-0.033303	0.915857	0.105267	FALSE	FALSE	FALSE	98530106	0.400246	0.0395907	reported	textfile	7	98159418	0.0334241	8.25544e-08	7738	TRUE	reported	textfile	0.00370107	28.7378	21.6391
	rs11215785	C	T	C	T	0.116001	-0.00289282	0.136228	0.890347	FALSE	FALSE	FALSE	116093430	0.938118	0.0372615	reported	textfile	11	115964147	0.0242663	1.74993e-06	7738	TRUE	reported	textfile	0.00294447	22.8457	21.6391
	rs11222172	A	T	A	T	0.0813449	0.041898	0.273837	0.248783	FALSE	TRUE	FALSE	130563011	0.121354	0.0270464	reported	textfile	11	130432906	0.0180494	6.58143e-06	7738	TRUE	reported	textfile	0.00261799	20.3059	21.6391
	rs12146529	T	C	T	C	0.0770318	-0.0472929	0.397649	0.651983	FALSE	FALSE	FALSE	130577959	0.0551366	0.02466	reported	textfile	11	130447854	0.0163455	2.44427e-06	7738	TRUE	reported	textfile	0.002862	22.204	21.6391
	rs12146531	A	G	A	G	0.076095	-0.0475537	0.398036	0.651972	FALSE	FALSE	FALSE	130577988	0.0537948	0.0246586	reported	textfile	11	130447883	0.0162944	3.0119e-06	7738	TRUE	reported	textfile	0.00281051	21.8034	21.6391
	rs136109	T	G	T	G	0.0894576	-0.0105107	0.209223	0.721327	FALSE	FALSE	FALSE	46972772	0.689568	0.0263136	reported	textfile	22	47368668	0.0201566	9.07423e-06	7738	TRUE	reported	textfile	0.00253903	19.6919	21.6391
	rs136110	C	T	C	T	0.0930184	-0.0133399	0.208243	0.728083	FALSE	FALSE	FALSE	46973764	0.614916	0.0265171	reported	textfile	22	47369660	0.0202956	4.57973e-06	7738	TRUE	reported	textfile	0.00270725	21.0001	21.6391
	rs1483968	T	C	T	C	0.150674	0.0407994	0.0577669	0.917298	FALSE	FALSE	FALSE	22482904	0.347993	0.0434736	reported	textfile	14	22951893	0.034063	9.71673e-06	7738	TRUE	reported	textfile	0.00252223	19.5613	21.6391
	rs1921585	G	A	G	A	0.076675	-0.0372279	0.40243	0.655911	FALSE	FALSE	FALSE	130630638	0.132297	0.0247344	reported	textfile	11	130500533	0.0163039	2.56537e-06	7738	TRUE	reported	textfile	0.00285008	22.1112	21.6391
	rs2844284	G	A	G	A	0.152203	-0.0547589	0.0623802	0.956526	FALSE	FALSE	FALSE	116153350	0.342093	0.0576386	reported	textfile	11	116024067	0.033918	7.21024e-06	7738	TRUE	reported	textfile	0.00259554	20.1314	21.6391
	rs4937552	C	G	C	G	0.0759601	0.0377205	0.40244	0.343921	FALSE	TRUE	FALSE	130630880	0.12759	0.0247562	reported	textfile	11	130500775	0.0163257	3.27454e-06	7738	TRUE	reported	textfile	0.00278988	21.6429	21.6391
	rs61915762	A	G	A	G	0.0875261	-0.0416982	0.275511	0.751325	FALSE	FALSE	FALSE	130572766	0.122986	0.0270354	reported	textfile	11	130442661	0.0180386	1.22129e-06	7738	TRUE	reported	textfile	0.00303334	23.5373	21.6391
	rs61915763	C	G	C	G	0.0871339	0.041547	0.275966	0.248698	FALSE	TRUE	FALSE	130572806	0.124344	0.0270349	reported	textfile	11	130442701	0.0180246	1.337e-06	7738	TRUE	reported	textfile	0.00301096	23.3631	21.6391
	rs62018962	A	C	A	C	-0.143107	-0.0236677	0.0988924	0.912784	FALSE	FALSE	FALSE	95436288	0.568065	0.0414566	reported	textfile	15	95979517	0.031333	4.94026e-06	7738	TRUE	reported	textfile	0.00268856	20.8548	21.6391
	rs62574072	T	C	T	C	0.120775	-0.0108221	0.101739	0.842729	FALSE	FALSE	FALSE	77058242	0.73921	0.0325087	reported	textfile	9	79673158	0.0273283	9.8976e-06	7738	TRUE	reported	textfile	0.00251771	19.5261	21.6391
	rs73200771	A	G	A	G	-0.163792	-0.0662305	0.0520806	0.959849	FALSE	FALSE	FALSE	87893163	0.271575	0.0602401	reported	textfile	12	88286940	0.035928	5.14209e-06	7738	TRUE	reported	textfile	0.00267871	20.7782	21.6391
	rs7848585	G	A	G	A	0.121487	-0.0100618	0.101813	0.842503	FALSE	FALSE	FALSE	77055688	0.756808	0.0324916	reported	textfile	9	79670604	0.0273197	8.71405e-06	7738	TRUE	reported	textfile	0.002549	19.7695	21.6391
GCST90027458	rs112209173	C	G	C	G	0.226024	0.0533957	0.063751	0.0975644	FALSE	TRUE	FALSE	7667185	0.180734	0.0398922	reported	textfile	1	7727245	0.049242	4.43098e-06	7738	TRUE	reported	textfile	0.00271536	21.0633	20.8268
	rs11634589	G	A	G	A	0.0996351	-0.0468889	0.347236	0.721048	FALSE	FALSE	FALSE	85520450	0.0725655	0.0261139	reported	textfile	15	86063681	0.0222792	7.74533e-06	7738	TRUE	reported	textfile	0.00257796	19.9946	20.8268
	rs11636027	A	G	A	G	0.0987079	-0.0507131	0.367752	0.719505	FALSE	FALSE	FALSE	85501027	0.0517011	0.0260653	reported	textfile	15	86044258	0.0220605	7.66196e-06	7738	TRUE	reported	textfile	0.00258061	20.0152	20.8268
	rs11637726	G	A	G	A	0.10064	-0.0441269	0.348117	0.720163	FALSE	FALSE	FALSE	85516040	0.0909034	0.0261005	reported	textfile	15	86059271	0.022258	6.14016e-06	7738	TRUE	reported	textfile	0.00263508	20.4389	20.8268
	rs11639291	A	G	A	G	0.0998248	-0.0469387	0.347295	0.721113	FALSE	FALSE	FALSE	85520899	0.072257	0.0261134	reported	textfile	15	86064130	0.0222792	7.44218e-06	7738	TRUE	reported	textfile	0.00258776	20.0708	20.8268
	rs12902447	G	A	G	A	0.0989743	-0.053074	0.368792	0.720988	FALSE	FALSE	FALSE	85484222	0.041916	0.0260889	reported	textfile	15	86027453	0.0220469	7.14727e-06	7738	TRUE	reported	textfile	0.00259771	20.1483	20.8268
	rs12913754	G	A	G	A	0.097925	-0.0497752	0.36924	0.719086	FALSE	FALSE	FALSE	85480307	0.0559654	0.0260425	reported	textfile	15	86023538	0.0220454	8.91354e-06	7738	TRUE	reported	textfile	0.00254341	19.726	20.8268
	rs12914250	T	C	T	C	0.0985444	-0.0529662	0.368478	0.720933	FALSE	FALSE	FALSE	85484096	0.042297	0.0260842	reported	textfile	15	86027327	0.0220533	7.87825e-06	7738	TRUE	reported	textfile	0.00257376	19.962	20.8268
	rs1483578	G	A	G	A	0.103058	-0.0425831	0.347982	0.720169	FALSE	FALSE	FALSE	85532186	0.102772	0.0260996	reported	textfile	15	86075417	0.0223516	4.0119e-06	7738	TRUE	reported	textfile	0.00273984	21.2537	20.8268
	rs1621183	G	A	G	A	0.204076	-0.016539	0.0696815	0.921879	FALSE	FALSE	FALSE	25478568	0.704528	0.0436137	reported	textfile	10	25767497	0.0446233	4.80098e-06	7738	TRUE	reported	textfile	0.00269563	20.9097	20.8268
	rs16916507	A	G	A	G	0.108315	0.0161473	0.317901	0.759751	FALSE	FALSE	FALSE	98496521	0.560337	0.0277282	reported	textfile	9	101258803	0.0230983	2.74145e-06	7738	TRUE	reported	textfile	0.00283371	21.9839	20.8268
	rs16916531	A	C	A	C	0.107141	0.012249	0.323511	0.756417	FALSE	FALSE	FALSE	98498703	0.656892	0.027575	reported	textfile	9	101260985	0.0231186	3.57981e-06	7738	TRUE	reported	textfile	0.00276793	21.4722	20.8268
	rs16916551	A	G	A	G	0.107941	0.0121409	0.31579	0.756469	FALSE	FALSE	FALSE	98499476	0.659752	0.0275771	reported	textfile	9	101261758	0.0231662	3.17074e-06	7738	TRUE	reported	textfile	0.00279781	21.7046	20.8268
	rs17193211	T	C	T	C	0.190762	-0.0614121	0.0746269	0.930166	FALSE	FALSE	FALSE	37513203	0.183776	0.0462016	reported	textfile	21	38885506	0.0409712	3.22419e-06	7738	TRUE	reported	textfile	0.00279372	21.6728	20.8268
	rs17554929	C	T	C	T	0.0990592	-0.0470256	0.368829	0.718547	FALSE	FALSE	FALSE	85506973	0.0700277	0.0259561	reported	textfile	15	86050204	0.0220423	6.98844e-06	7738	TRUE	reported	textfile	0.00260324	20.1913	20.8268
	rs17625240	T	A	T	A	0.0997145	0.052235	0.368707	0.280707	FALSE	TRUE	FALSE	85504808	0.0449118	0.0260461	reported	textfile	15	86048039	0.0220506	6.12393e-06	7738	TRUE	reported	textfile	0.00263573	20.4439	20.8268
	rs2062234	C	T	C	T	0.101023	-0.0523763	0.382359	0.712906	FALSE	FALSE	FALSE	85511259	0.0430408	0.0258864	reported	textfile	15	86054490	0.0218464	3.75976e-06	7738	TRUE	reported	textfile	0.00275584	21.3781	20.8268
	rs2189903	C	A	C	A	0.212169	-0.0246961	0.057391	0.898445	FALSE	FALSE	FALSE	8506438	0.52824	0.0391569	reported	textfile	7	8546068	0.0475208	8.01567e-06	7738	TRUE	reported	textfile	0.00256951	19.9289	20.8268
	rs2344432	T	C	T	C	0.0979656	-0.0525144	0.367907	0.719659	FALSE	FALSE	FALSE	85499542	0.0438177	0.026051	reported	textfile	15	86042773	0.0220564	8.92915e-06	7738	TRUE	reported	textfile	0.00254298	19.7227	20.8268
	rs34438394	G	A	G	A	0.0981917	-0.0501868	0.368195	0.719061	FALSE	FALSE	FALSE	85490964	0.0539685	0.0260428	reported	textfile	15	86034195	0.0220515	8.47383e-06	7738	TRUE	reported	textfile	0.00255584	19.8226	20.8268
	rs34484845	A	G	A	G	0.0984421	-0.04978	0.367913	0.71917	FALSE	FALSE	FALSE	85503580	0.0559526	0.0260436	reported	textfile	15	86046811	0.0220645	8.13654e-06	7738	TRUE	reported	textfile	0.00256584	19.9004	20.8268
	rs34585751	G	T	G	T	0.0990708	-0.0539408	0.368681	0.716236	FALSE	FALSE	FALSE	85504872	0.037866	0.0259793	reported	textfile	15	86048103	0.0220484	7.01181e-06	7738	TRUE	reported	textfile	0.00260242	20.1848	20.8268
	rs35184622	G	A	G	A	0.102888	-0.0431971	0.348006	0.720281	FALSE	FALSE	FALSE	85529804	0.0978723	0.0260969	reported	textfile	15	86073035	0.022265	3.81777e-06	7738	TRUE	reported	textfile	0.00275206	21.3487	20.8268
	rs35316253	C	T	C	T	0.0991006	-0.0469317	0.347199	0.721113	FALSE	FALSE	FALSE	85522329	0.0723003	0.0261134	reported	textfile	15	86065560	0.0222645	8.54476e-06	7738	TRUE	reported	textfile	0.0025538	19.8068	20.8268
	rs35343117	G	C	G	C	0.102801	0.0427304	0.347886	0.279753	FALSE	TRUE	FALSE	85535884	0.101583	0.0260993	reported	textfile	15	86079115	0.022359	4.27071e-06	7738	TRUE	reported	textfile	0.00272443	21.1338	20.8268
	rs35558728	C	T	C	T	0.0984264	-0.0497752	0.369037	0.719086	FALSE	FALSE	FALSE	85480880	0.0559654	0.0260425	reported	textfile	15	86024111	0.0220576	8.11073e-06	7738	TRUE	reported	textfile	0.00256662	19.9065	20.8268
	rs35813075	T	C	T	C	0.0985444	-0.0529487	0.368478	0.720939	FALSE	FALSE	FALSE	85484003	0.0423643	0.026084	reported	textfile	15	86027234	0.0220533	7.87825e-06	7738	TRUE	reported	textfile	0.00257376	19.962	20.8268
	rs35899940	G	A	G	A	0.101402	-0.0497926	0.382337	0.713023	FALSE	FALSE	FALSE	85510466	0.0544026	0.0258849	reported	textfile	15	86053697	0.0218724	3.55132e-06	7738	TRUE	reported	textfile	0.00276992	21.4876	20.8268
	rs36098649	T	C	T	C	0.100438	-0.0449304	0.347552	0.720757	FALSE	FALSE	FALSE	85513576	0.0852747	0.0261092	reported	textfile	15	86056807	0.0222734	6.50324e-06	7738	TRUE	reported	textfile	0.00262093	20.3288	20.8268
	rs3886250	G	T	G	T	0.100295	-0.0550013	0.371409	0.716511	FALSE	FALSE	FALSE	85509625	0.0342728	0.0259827	reported	textfile	15	86052856	0.0220195	5.2424e-06	7738	TRUE	reported	textfile	0.00267394	20.7411	20.8268
	rs4940531	G	T	G	T	0.105593	0.0373981	0.474197	0.556853	FALSE	FALSE	FALSE	61852256	0.115158	0.0237384	reported	textfile	18	59519489	0.0213323	7.42472e-07	7738	TRUE	reported	textfile	0.00315641	24.4953	20.8268
	rs56301029	C	G	C	G	0.108725	-0.0129498	0.316134	0.243484	FALSE	TRUE	FALSE	98498829	0.63868	0.0275793	reported	textfile	9	101261111	0.023115	2.55558e-06	7738	TRUE	reported	textfile	0.00285103	22.1187	20.8268
	rs7134245	A	C	A	C	0.186896	0.0610716	0.077241	0.896494	FALSE	FALSE	FALSE	32408591	0.113258	0.0385622	reported	textfile	12	32561525	0.0410013	5.15715e-06	7738	TRUE	reported	textfile	0.00267801	20.7727	20.8268
	rs719138	G	T	G	T	0.100981	-0.0497851	0.382515	0.713587	FALSE	FALSE	FALSE	85511831	0.0548239	0.0259261	reported	textfile	15	86055062	0.0218842	3.9433e-06	7738	TRUE	reported	textfile	0.00274407	21.2866	20.8268
	rs7229834	T	C	T	C	0.106916	0.0367181	0.470799	0.557228	FALSE	FALSE	FALSE	61853127	0.121838	0.0237334	reported	textfile	18	59520360	0.0214352	6.10478e-07	7738	TRUE	reported	textfile	0.00320485	24.8724	20.8268
	rs725686	G	T	G	T	0.0991572	-0.0523115	0.36869	0.719253	FALSE	FALSE	FALSE	85496333	0.0445195	0.0260364	reported	textfile	15	86039564	0.0220418	6.84006e-06	7738	TRUE	reported	textfile	0.0026085	20.2322	20.8268
	rs73694568	A	C	A	C	0.17137	0.021265	0.0998582	0.919873	FALSE	FALSE	FALSE	93261175	0.633343	0.0445781	reported	textfile	8	94273403	0.038209	7.28887e-06	7738	TRUE	reported	textfile	0.00259288	20.1106	20.8268
GCST90027459	rs11096861	A	G	A	G	-0.0761351	0.00755109	0.651408	0.321701	FALSE	FALSE	FALSE	37093797	0.765114	0.0252738	reported	textfile	4	37095419	0.0168888	6.54335e-06	7738	TRUE	reported	textfile	0.00261942	20.317	21.1156
	rs11733992	G	A	G	A	-0.0758514	0.0062575	0.651145	0.320597	FALSE	FALSE	FALSE	37096976	0.80459	0.0252919	reported	textfile	4	37098598	0.016864	6.86483e-06	7738	TRUE	reported	textfile	0.00260761	20.2252	21.1156
	rs12121204	C	G	C	G	-0.077328	-0.0733174	0.457525	0.384073	FALSE	TRUE	TRUE	165861079	0.00254179	0.0242908	reported	textfile	1	165830316	0.0164735	2.67793e-06	7738	TRUE	reported	textfile	0.00283948	22.0287	21.1156
	rs12562047	G	T	G	T	-0.0747719	0.0783167	0.461036	0.617937	FALSE	FALSE	FALSE	165859919	0.00128162	0.0243215	reported	textfile	1	165829156	0.0164755	5.66905e-06	7738	TRUE	reported	textfile	0.00265471	20.5915	21.1156
	rs1365342	G	A	G	A	-0.0756194	0.00646341	0.651167	0.320489	FALSE	FALSE	FALSE	37097911	0.798291	0.0252912	reported	textfile	4	37099533	0.0168641	7.32386e-06	7738	TRUE	reported	textfile	0.0025917	20.1015	21.1156
	rs1426419	A	T	A	T	-0.075771	-0.00672846	0.651154	0.679579	FALSE	TRUE	FALSE	37105761	0.79018	0.0252876	reported	textfile	4	37107383	0.0168647	7.02716e-06	7738	TRUE	reported	textfile	0.00260189	20.1807	21.1156
	rs142998520	A	C	A	C	0.173555	-0.0522998	0.0523446	0.952198	FALSE	FALSE	FALSE	6852378	0.345215	0.0554075	reported	textfile	17	6755697	0.0392371	9.72367e-06	7738	TRUE	reported	textfile	0.00252206	19.56	21.1156
	rs1550184	A	T	A	T	0.118379	-0.067612	0.65617	0.676814	FALSE	TRUE	FALSE	22615435	0.00724987	0.02518	reported	textfile	22	22957905	0.0266841	9.15103e-06	7738	TRUE	reported	textfile	0.00253695	19.6758	21.1156
	rs1633829	G	A	G	A	0.11921	0.0339411	0.527267	0.423525	FALSE	FALSE	FALSE	22629925	0.160498	0.024185	reported	textfile	22	22972396	0.0252197	2.28018e-06	7738	TRUE	reported	textfile	0.00287915	22.3374	21.1156
	rs193279083	A	G	A	G	0.178774	-0.104919	0.0521605	0.930369	FALSE	FALSE	FALSE	42806777	0.0269488	0.047426	reported	textfile	12	43200579	0.0371296	1.47302e-06	7738	TRUE	reported	textfile	0.00298703	23.1769	21.1156
	rs2106388	C	T	C	T	0.118274	0.0667028	0.656244	0.322956	FALSE	FALSE	FALSE	22615956	0.00808016	0.0251832	reported	textfile	22	22958426	0.0266982	9.42193e-06	7738	TRUE	reported	textfile	0.0025298	19.6202	21.1156
	rs2114312	T	C	T	C	-0.0761163	0.00677468	0.651367	0.320385	FALSE	FALSE	FALSE	37081603	0.788833	0.025295	reported	textfile	4	37083225	0.0168895	6.58385e-06	7738	TRUE	reported	textfile	0.00261791	20.3053	21.1156
	rs2180	A	G	A	G	-0.0832534	0.00554746	0.261092	0.785508	FALSE	FALSE	FALSE	32971971	0.846643	0.0286834	reported	textfile	21	34344279	0.0185921	7.53841e-06	7738	TRUE	reported	textfile	0.00258461	20.0463	21.1156
	rs2834037	G	A	G	A	-0.0813609	0.00179875	0.262261	0.78763	FALSE	FALSE	FALSE	32976116	0.95007	0.0287253	reported	textfile	21	34348424	0.0183939	9.72232e-06	7738	TRUE	reported	textfile	0.00252208	19.5601	21.1156
	rs28635178	A	G	A	G	-0.157135	-0.0202793	0.0565904	0.935517	FALSE	FALSE	FALSE	66040991	0.678207	0.0488761	reported	textfile	3	66026666	0.0350722	7.45315e-06	7738	TRUE	reported	textfile	0.00258741	20.0682	21.1156
	rs2995916	G	T	G	T	0.079086	-0.0178806	0.501878	0.374496	FALSE	FALSE	FALSE	37909375	0.462743	0.0243492	reported	textfile	4	37910996	0.0166671	2.08468e-06	7738	TRUE	reported	textfile	0.00290127	22.5096	21.1156
	rs4306796	A	G	A	G	0.117181	0.0659137	0.644806	0.314139	FALSE	FALSE	FALSE	22601683	0.010124	0.0256317	reported	textfile	22	22944153	0.026334	8.59528e-06	7738	TRUE	reported	textfile	0.00255236	19.7956	21.1156
	rs447060	T	A	T	A	0.122149	-0.0316354	0.524566	0.575725	FALSE	TRUE	TRUE	22626231	0.190331	0.0241565	reported	textfile	22	22968702	0.0252304	1.28964e-06	7738	TRUE	reported	textfile	0.00301988	23.4325	21.1156
	rs466481	A	T	A	T	0.122845	-0.0337719	0.52645	0.576429	FALSE	TRUE	TRUE	22629471	0.162551	0.0241825	reported	textfile	22	22971942	0.0252436	1.13674e-06	7738	TRUE	reported	textfile	0.0030511	23.6756	21.1156
	rs4820495	C	T	C	T	0.117283	0.0679448	0.651611	0.312996	FALSE	FALSE	FALSE	22610004	0.00742523	0.0253795	reported	textfile	22	22952474	0.0265012	9.61834e-06	7738	TRUE	reported	textfile	0.00252472	19.5806	21.1156
	rs4822245	C	A	C	A	0.120035	0.0326873	0.526877	0.422665	FALSE	FALSE	FALSE	22618476	0.175458	0.0241257	reported	textfile	22	22960946	0.0251659	1.84455e-06	7738	TRUE	reported	textfile	0.00293148	22.7446	21.1156
	rs485338	G	A	G	A	-0.0737522	0.0615727	0.428387	0.669265	FALSE	FALSE	FALSE	165906706	0.013755	0.024993	reported	textfile	1	165875943	0.0164691	7.52679e-06	7738	TRUE	reported	textfile	0.00258498	20.0492	21.1156
	rs5759074	A	G	A	G	0.118342	0.0326827	0.527702	0.422665	FALSE	FALSE	FALSE	22617747	0.175504	0.0241249	reported	textfile	22	22960217	0.0250977	2.4139e-06	7738	TRUE	reported	textfile	0.00286507	22.2279	21.1156
	rs5759076	G	C	G	C	0.118329	-0.0326202	0.527667	0.577313	FALSE	TRUE	TRUE	22617803	0.176342	0.0241255	reported	textfile	22	22960273	0.0250997	2.42488e-06	7738	TRUE	reported	textfile	0.00286399	22.2194	21.1156
	rs5996240	T	C	T	C	0.117569	0.0426938	0.480013	0.465882	FALSE	FALSE	FALSE	22601278	0.0752593	0.0240004	reported	textfile	22	22943748	0.0252733	3.28874e-06	7738	TRUE	reported	textfile	0.00278882	21.6346	21.1156
	rs5996241	A	G	A	G	0.117865	0.0427529	0.480113	0.465877	FALSE	FALSE	FALSE	22601312	0.0748514	0.024	reported	textfile	22	22943782	0.0252762	3.11516e-06	7738	TRUE	reported	textfile	0.0028022	21.7387	21.1156
	rs61802911	C	A	C	A	-0.076951	0.0738245	0.454465	0.614552	FALSE	FALSE	FALSE	165860561	0.00236086	0.0242794	reported	textfile	1	165829798	0.0165063	3.13285e-06	7738	TRUE	reported	textfile	0.0028008	21.7279	21.1156
	rs6828981	T	G	T	G	-0.0761386	0.0107975	0.650799	0.323721	FALSE	FALSE	FALSE	37079058	0.668542	0.0252189	reported	textfile	4	37080680	0.0168914	6.55873e-06	7738	TRUE	reported	textfile	0.00261885	20.3126	21.1156
	rs7033951	T	C	T	C	0.0740912	-0.00994641	0.506403	0.52999	FALSE	FALSE	FALSE	14744707	0.672501	0.0235296	reported	textfile	9	14744705	0.016363	5.95566e-06	7738	TRUE	reported	textfile	0.00264259	20.4972	21.1156
	rs729829	C	T	C	T	0.0753217	-0.0315161	0.436231	0.557494	FALSE	FALSE	FALSE	9098938	0.184394	0.0237436	reported	textfile	1	9158997	0.0163102	3.87293e-06	7738	TRUE	reported	textfile	0.00274851	21.3211	21.1156
	rs73128976	C	T	C	T	0.176865	-0.106503	0.0525181	0.929907	FALSE	FALSE	FALSE	42795295	0.0241552	0.0472371	reported	textfile	12	43189097	0.0369398	1.68519e-06	7738	TRUE	reported	textfile	0.0029538	22.9183	21.1156
	rs73128980	A	T	A	T	0.176702	0.106019	0.052541	0.0701261	FALSE	TRUE	FALSE	42797280	0.0247839	0.0472297	reported	textfile	12	43191082	0.036937	1.71937e-06	7738	TRUE	reported	textfile	0.00294882	22.8795	21.1156
	rs73128987	T	C	T	C	0.176865	-0.106024	0.0525181	0.929874	FALSE	FALSE	FALSE	42799521	0.0247782	0.0472297	reported	textfile	12	43193323	0.0369398	1.68519e-06	7738	TRUE	reported	textfile	0.0029538	22.9183	21.1156
	rs73133322	A	G	A	G	0.176176	-0.114732	0.0523066	0.929706	FALSE	FALSE	FALSE	42710246	0.0150172	0.0471766	reported	textfile	12	43104048	0.0365597	1.44384e-06	7738	TRUE	reported	textfile	0.00299198	23.2154	21.1156
	rs73133343	G	T	G	T	0.178631	-0.114416	0.0524294	0.929694	FALSE	FALSE	FALSE	42725914	0.0152957	0.0471759	reported	textfile	12	43119716	0.0365904	1.05061e-06	7738	TRUE	reported	textfile	0.00307054	23.8269	21.1156
	rs746455	A	G	A	G	-0.0755991	0.00667789	0.651171	0.320444	FALSE	FALSE	FALSE	37100171	0.791737	0.0252898	reported	textfile	4	37101793	0.0168641	7.36597e-06	7738	TRUE	reported	textfile	0.00259031	20.0907	21.1156
	rs7539819	G	T	G	T	-0.0767416	0.0753739	0.494724	0.597332	FALSE	FALSE	FALSE	165881359	0.00173888	0.0240692	reported	textfile	1	165850596	0.0162865	2.45347e-06	7738	TRUE	reported	textfile	0.0028611	22.197	21.1156
	rs7543127	T	C	T	C	0.0714055	-0.059249	0.527776	0.3667	FALSE	FALSE	FALSE	165891630	0.0153186	0.024435	reported	textfile	1	165860867	0.0161577	9.9033e-06	7738	TRUE	reported	textfile	0.00251757	19.525	21.1156
	rs7657188	C	A	C	A	-0.0758021	0.0067067	0.651138	0.320427	FALSE	FALSE	FALSE	37102859	0.790842	0.0252875	reported	textfile	4	37104481	0.016864	6.96017e-06	7738	TRUE	reported	textfile	0.00260423	20.199	21.1156
	rs770027	T	C	T	C	0.0773298	-0.0252206	0.459954	0.5364	FALSE	FALSE	FALSE	9112377	0.285526	0.0236151	reported	textfile	1	9172436	0.0163142	2.13678e-06	7738	TRUE	reported	textfile	0.00289517	22.4621	21.1156
	rs7777432	A	G	A	G	0.0763596	0.0629212	0.349483	0.729582	FALSE	FALSE	FALSE	21373561	0.0181422	0.026631	reported	textfile	7	21413179	0.0170041	7.10019e-06	7738	TRUE	reported	textfile	0.00259933	20.1608	21.1156
	rs7953577	C	G	C	G	-0.0786353	-0.00838109	0.326388	0.448896	FALSE	TRUE	TRUE	104480522	0.724983	0.023823	reported	textfile	12	104874300	0.0175409	7.36156e-06	7738	TRUE	reported	textfile	0.00259046	20.0918	21.1156
	rs7956477	G	C	G	C	-0.0769257	0.00298878	0.327621	0.470164	FALSE	TRUE	TRUE	104486691	0.899951	0.0237728	reported	textfile	12	104880469	0.0173346	9.09306e-06	7738	TRUE	reported	textfile	0.00253853	19.6881	21.1156
	rs919100	A	C	A	C	-0.0761891	0.0067168	0.651308	0.320382	FALSE	FALSE	FALSE	37090833	0.790589	0.0252944	reported	textfile	4	37092455	0.0168886	6.44421e-06	7738	TRUE	reported	textfile	0.00262319	20.3463	21.1156
	rs928778	T	A	T	A	-0.0823241	-0.00422664	0.262575	0.214637	FALSE	TRUE	FALSE	32974651	0.882728	0.0286528	reported	textfile	21	34346959	0.0185496	9.078e-06	7738	TRUE	reported	textfile	0.00253894	19.6912	21.1156
	rs9654134	C	A	C	A	-0.0750837	0.0188722	0.648364	0.32399	FALSE	FALSE	FALSE	37076122	0.454887	0.0252541	reported	textfile	4	37077744	0.016852	8.37047e-06	7738	TRUE	reported	textfile	0.00255886	19.8461	21.1156
GCST90027460	rs11243618	C	T	C	T	-0.0791183	0.0149277	0.367525	0.761304	FALSE	FALSE	FALSE	130522778	0.591722	0.0278324	reported	textfile	9	133398165	0.0177334	8.13729e-06	7738	TRUE	reported	textfile	0.00256582	19.9002	21.8716
	rs113403124	C	T	C	T	0.148864	0.0324257	0.0764148	0.901549	FALSE	FALSE	FALSE	134265403	0.422323	0.040411	reported	textfile	6	134586541	0.0329176	6.1166e-06	7738	TRUE	reported	textfile	0.00263602	20.4461	21.8716
	rs113742390	A	G	A	G	0.114326	-0.0584937	0.121163	0.910155	FALSE	FALSE	FALSE	130515962	0.15745	0.0413763	reported	textfile	9	133391349	0.0254571	7.09137e-06	7738	TRUE	reported	textfile	0.00259964	20.1632	21.8716
	rs1195866	C	T	C	T	-0.0975148	0.0597645	0.168633	0.808435	FALSE	FALSE	FALSE	81212569	0.0458902	0.029936	reported	textfile	1	81678254	0.0219611	8.98214e-06	7738	TRUE	reported	textfile	0.00254155	19.7115	21.8716
	rs13162740	A	G	A	G	0.116234	0.041866	0.126842	0.895634	FALSE	FALSE	FALSE	147689095	0.275195	0.0383677	reported	textfile	5	147068658	0.0244733	2.04e-06	7738	TRUE	reported	textfile	0.00290662	22.5512	21.8716
	rs13172946	A	T	A	T	0.116654	-0.0538947	0.117436	0.0978845	FALSE	TRUE	FALSE	147653474	0.173451	0.0395936	reported	textfile	5	147033037	0.0257327	5.80698e-06	7738	TRUE	reported	textfile	0.00264879	20.5455	21.8716
	rs13337979	G	T	G	T	0.0830381	-0.0158411	0.694032	0.308913	FALSE	FALSE	FALSE	84311818	0.534913	0.0255286	reported	textfile	16	84345424	0.0182973	5.67153e-06	7738	TRUE	reported	textfile	0.00265459	20.5906	21.8716
	rs142048748	G	A	G	A	-0.172479	0.00662161	0.0511089	0.949383	FALSE	FALSE	FALSE	121797142	0.901981	0.0537646	reported	textfile	12	122235048	0.0386304	8.01254e-06	7738	TRUE	reported	textfile	0.00256961	19.9297	21.8716
	rs1447470	A	G	A	G	0.0891093	0.0416616	0.735812	0.262703	FALSE	FALSE	FALSE	112825748	0.120333	0.02682	reported	textfile	11	112696471	0.0196522	5.77896e-06	7738	TRUE	reported	textfile	0.00264998	20.5547	21.8716
	rs1610791	G	A	G	A	0.0770694	-0.0394421	0.669101	0.286614	FALSE	FALSE	FALSE	52416462	0.133718	0.0263018	reported	textfile	12	52810246	0.0171209	6.74808e-06	7738	TRUE	reported	textfile	0.00261184	20.2581	21.8716
	rs17107181	G	T	G	T	0.117279	0.0447549	0.118239	0.910585	FALSE	FALSE	FALSE	147685318	0.276415	0.0411196	reported	textfile	5	147064881	0.0253547	3.73672e-06	7738	TRUE	reported	textfile	0.00275737	21.39	21.8716
	rs17107192	G	C	G	C	0.118967	-0.0452415	0.118337	0.0893777	FALSE	TRUE	FALSE	147687081	0.271311	0.0411269	reported	textfile	5	147066644	0.0253682	2.73728e-06	7738	TRUE	reported	textfile	0.00283408	21.9868	21.8716
	rs17107200	G	T	G	T	0.117777	0.0450892	0.118145	0.91063	FALSE	FALSE	FALSE	147687608	0.273107	0.0411423	reported	textfile	5	147067171	0.0253686	3.43985e-06	7738	TRUE	reported	textfile	0.00277774	21.5484	21.8716
	rs17495305	G	T	G	T	0.116654	0.0537566	0.117449	0.902118	FALSE	FALSE	FALSE	147661954	0.174563	0.0395943	reported	textfile	5	147041517	0.0257325	5.80617e-06	7738	TRUE	reported	textfile	0.00264883	20.5458	21.8716
	rs17495840	G	A	G	A	0.119174	0.0551601	0.117417	0.902098	FALSE	FALSE	FALSE	147675184	0.163635	0.0395994	reported	textfile	5	147054747	0.0254975	2.9542e-06	7738	TRUE	reported	textfile	0.00281524	21.8401	21.8716
	rs17496036	C	T	C	T	0.120894	0.0477263	0.117393	0.910547	FALSE	FALSE	FALSE	147680818	0.245549	0.0410999	reported	textfile	5	147060381	0.0254703	2.0699e-06	7738	TRUE	reported	textfile	0.00290302	22.5231	21.8716
	rs17496399	C	T	C	T	0.121087	0.0453391	0.117622	0.910617	FALSE	FALSE	FALSE	147685145	0.270193	0.0411195	reported	textfile	5	147064708	0.0254294	1.91969e-06	7738	TRUE	reported	textfile	0.00292162	22.6679	21.8716
	rs17496550	T	C	T	C	0.121087	0.0452841	0.117622	0.910621	FALSE	FALSE	FALSE	147686645	0.270826	0.0411239	reported	textfile	5	147066208	0.0254294	1.91969e-06	7738	TRUE	reported	textfile	0.00292162	22.6679	21.8716
	rs1752223	G	C	G	C	-0.0976795	-0.0603391	0.168276	0.192055	FALSE	TRUE	FALSE	81215167	0.0437945	0.0299293	reported	textfile	1	81680852	0.0219673	8.72469e-06	7738	TRUE	reported	textfile	0.00254869	19.767	21.8716
	rs17561036	A	G	A	G	0.116654	0.053873	0.117436	0.902116	FALSE	FALSE	FALSE	147652398	0.173627	0.0395938	reported	textfile	5	147031961	0.0257327	5.80698e-06	7738	TRUE	reported	textfile	0.00264879	20.5455	21.8716
	rs17561784	T	C	T	C	0.122378	0.0453705	0.117215	0.910615	FALSE	FALSE	FALSE	147680282	0.269806	0.0411148	reported	textfile	5	147059845	0.0255005	1.59419e-06	7738	TRUE	reported	textfile	0.00296749	23.0249	21.8716
	rs17562343	G	A	G	A	0.12104	0.0453379	0.117628	0.910619	FALSE	FALSE	FALSE	147685895	0.270225	0.0411211	reported	textfile	5	147065458	0.0254293	1.93736e-06	7738	TRUE	reported	textfile	0.00291938	22.6504	21.8716
	rs1760262	C	T	C	T	-0.114966	0.0424653	0.854015	0.15479	FALSE	FALSE	FALSE	130516366	0.191983	0.032547	reported	textfile	9	133391753	0.0233442	8.44306e-07	7738	TRUE	reported	textfile	0.00312459	24.2476	21.8716
	rs1760263	C	T	C	T	-0.114965	0.0424644	0.854019	0.15479	FALSE	FALSE	FALSE	130516320	0.191991	0.032547	reported	textfile	9	133391707	0.0233434	8.43937e-07	7738	TRUE	reported	textfile	0.00312475	24.2488	21.8716
	rs1760264	C	T	C	T	-0.114323	0.0424559	0.854096	0.154791	FALSE	FALSE	FALSE	130516054	0.192079	0.0325469	reported	textfile	9	133391441	0.023336	9.63274e-07	7738	TRUE	reported	textfile	0.00309201	23.994	21.8716
	rs181740	C	G	C	G	0.0848428	0.0267044	0.705564	0.716746	FALSE	TRUE	FALSE	84314288	0.307232	0.0261539	reported	textfile	16	84347894	0.0185014	4.52387e-06	7738	TRUE	reported	textfile	0.00271028	21.0237	21.8716
	rs2053050	G	T	G	T	0.116654	0.0538926	0.117436	0.902116	FALSE	FALSE	FALSE	147650704	0.173471	0.0395938	reported	textfile	5	147030267	0.0257327	5.80698e-06	7738	TRUE	reported	textfile	0.00264879	20.5455	21.8716
	rs2053052	C	T	C	T	0.116635	0.0538432	0.117445	0.902117	FALSE	FALSE	FALSE	147649942	0.173868	0.0395941	reported	textfile	5	147029505	0.0257331	5.82921e-06	7738	TRUE	reported	textfile	0.00264785	20.5381	21.8716
	rs2915536	T	G	T	G	-0.114134	0.0354528	0.859739	0.118176	FALSE	FALSE	FALSE	130518879	0.331273	0.0364908	reported	textfile	9	133394266	0.023485	1.17471e-06	7738	TRUE	reported	textfile	0.00304296	23.6122	21.8716
	rs35285805	T	C	T	C	0.116484	0.0538924	0.117446	0.902116	FALSE	FALSE	FALSE	147657830	0.173464	0.039593	reported	textfile	5	147037393	0.0257332	5.99418e-06	7738	TRUE	reported	textfile	0.002641	20.4848	21.8716
	rs368649	G	A	G	A	0.0767816	-0.039075	0.669136	0.286639	FALSE	FALSE	FALSE	52414940	0.13724	0.0262928	reported	textfile	12	52808724	0.0171346	7.42609e-06	7738	TRUE	reported	textfile	0.00258829	20.0749	21.8716
	rs381107	T	C	T	C	0.0848	-0.0142305	0.686985	0.310875	FALSE	FALSE	FALSE	84311081	0.576441	0.0254757	reported	textfile	16	84344687	0.0181914	3.13841e-06	7738	TRUE	reported	textfile	0.00280035	21.7244	21.8716
	rs388905	A	G	A	G	0.0844236	-0.0264577	0.705379	0.283489	FALSE	FALSE	FALSE	84313480	0.3105	0.0260879	reported	textfile	16	84347086	0.0185195	5.14861e-06	7738	TRUE	reported	textfile	0.0026784	20.7758	21.8716
	rs393435	C	T	C	T	0.0853315	-0.0140588	0.687467	0.310835	FALSE	FALSE	FALSE	84310927	0.581059	0.0254763	reported	textfile	16	84344533	0.0182062	2.77313e-06	7738	TRUE	reported	textfile	0.00283087	21.9618	21.8716
	rs431596	G	A	G	A	0.0849894	-0.0142409	0.686975	0.31087	FALSE	FALSE	FALSE	84311125	0.576172	0.0254763	reported	textfile	16	84344731	0.0181965	3.00262e-06	7738	TRUE	reported	textfile	0.00281127	21.8093	21.8716
	rs454605	G	C	G	C	0.0849851	0.0142225	0.686966	0.689131	FALSE	TRUE	FALSE	84311117	0.576664	0.0254762	reported	textfile	16	84344723	0.0181961	3.00469e-06	7738	TRUE	reported	textfile	0.00281111	21.808	21.8716
	rs4683140	C	T	C	T	-0.0783129	0.0249811	0.579406	0.455432	FALSE	FALSE	FALSE	45781426	0.293245	0.0237682	reported	textfile	3	45822918	0.0167721	3.02315e-06	7738	TRUE	reported	textfile	0.00280958	21.7961	21.8716
	rs4705189	T	C	T	C	0.116654	0.0539532	0.117449	0.9021	FALSE	FALSE	FALSE	147659746	0.172977	0.0395928	reported	textfile	5	147039309	0.0257325	5.80617e-06	7738	TRUE	reported	textfile	0.00264883	20.5458	21.8716
	rs4705190	C	T	C	T	0.119717	0.0560507	0.117551	0.902065	FALSE	FALSE	FALSE	147675972	0.156773	0.0395836	reported	textfile	5	147055535	0.0254528	2.55723e-06	7738	TRUE	reported	textfile	0.00285083	22.1171	21.8716
	rs473387	A	G	A	G	-0.108211	0.0299881	0.855978	0.135327	FALSE	FALSE	FALSE	130519229	0.38537	0.0345467	reported	textfile	9	133394616	0.02329	3.38034e-06	7738	TRUE	reported	textfile	0.00278205	21.582	21.8716
	rs475212	G	A	G	A	-0.11463	0.0358532	0.86052	0.118035	FALSE	FALSE	FALSE	130519053	0.325991	0.0365022	reported	textfile	9	133394440	0.0235225	1.09802e-06	7738	TRUE	reported	textfile	0.00305964	23.742	21.8716
	rs477218	G	T	G	T	-0.114197	0.0356885	0.859748	0.11799	FALSE	FALSE	FALSE	130518782	0.32821	0.0365016	reported	textfile	9	133394169	0.0234859	1.16001e-06	7738	TRUE	reported	textfile	0.00304608	23.6365	21.8716
	rs505664	G	T	G	T	-0.114079	0.0354861	0.860322	0.118057	FALSE	FALSE	FALSE	130518063	0.330602	0.0364745	reported	textfile	9	133393450	0.0235656	1.29262e-06	7738	TRUE	reported	textfile	0.00301934	23.4284	21.8716
	rs508520	C	A	C	A	-0.114522	0.0363841	0.860215	0.118273	FALSE	FALSE	FALSE	130517722	0.318055	0.0364401	reported	textfile	9	133393109	0.0235681	1.17861e-06	7738	TRUE	reported	textfile	0.00304212	23.6057	21.8716
	rs508609	G	A	G	A	-0.114319	0.0356216	0.860193	0.11834	FALSE	FALSE	FALSE	130517687	0.328144	0.0364281	reported	textfile	9	133393074	0.0235667	1.22922e-06	7738	TRUE	reported	textfile	0.00303174	23.5249	21.8716
	rs510424	C	T	C	T	-0.114153	0.0334392	0.859255	0.118374	FALSE	FALSE	FALSE	130517513	0.358691	0.0364316	reported	textfile	9	133392900	0.0235349	1.23228e-06	7738	TRUE	reported	textfile	0.00303112	23.52	21.8716
	rs511179	C	G	C	G	-0.115706	-0.0338154	0.85471	0.878341	FALSE	TRUE	FALSE	130517454	0.348523	0.0360714	reported	textfile	9	133392841	0.0232243	6.28956e-07	7738	TRUE	reported	textfile	0.00319747	24.815	21.8716
	rs559956	G	C	G	C	-0.107265	-0.0297831	0.855764	0.86473	FALSE	TRUE	FALSE	130519553	0.388973	0.034572	reported	textfile	9	133394940	0.0233054	4.17254e-06	7738	TRUE	reported	textfile	0.00273015	21.1783	21.8716
	rs561089	C	T	C	T	-0.107422	0.0304683	0.855803	0.135155	FALSE	FALSE	FALSE	130519392	0.378117	0.0345692	reported	textfile	9	133394779	0.023307	4.04604e-06	7738	TRUE	reported	textfile	0.00273775	21.2374	21.8716
	rs562018	A	G	A	G	-0.107268	0.0302339	0.855852	0.135205	FALSE	FALSE	FALSE	130519284	0.381664	0.0345596	reported	textfile	9	133394671	0.0233076	4.17869e-06	7738	TRUE	reported	textfile	0.00272979	21.1755	21.8716
	rs584159	A	C	A	C	-0.11419	0.0357226	0.859732	0.11804	FALSE	FALSE	FALSE	130518935	0.32762	0.0364919	reported	textfile	9	133394322	0.0234853	1.16086e-06	7738	TRUE	reported	textfile	0.00304586	23.6348	21.8716
	rs593615	G	A	G	A	0.0765758	-0.0392053	0.669468	0.286629	FALSE	FALSE	FALSE	52415554	0.13601	0.0262979	reported	textfile	12	52809338	0.0171466	7.97132e-06	7738	TRUE	reported	textfile	0.00257087	19.9395	21.8716
	rs595786	G	A	G	A	-0.114505	0.0355721	0.860684	0.118039	FALSE	FALSE	FALSE	130518679	0.329514	0.0364807	reported	textfile	9	133394066	0.0235205	1.12551e-06	7738	TRUE	reported	textfile	0.00305351	23.6943	21.8716
	rs597275	T	C	T	C	-0.114539	0.0316495	0.860681	0.118255	FALSE	FALSE	FALSE	130518330	0.38514	0.0364431	reported	textfile	9	133393717	0.0235194	1.11604e-06	7738	TRUE	reported	textfile	0.0030556	23.7106	21.8716
	rs598208	A	G	A	G	-0.114545	0.0355016	0.860687	0.118052	FALSE	FALSE	FALSE	130518123	0.330392	0.0364746	reported	textfile	9	133393510	0.0235191	1.11424e-06	7738	TRUE	reported	textfile	0.003056	23.7137	21.8716
	rs598243	A	G	A	G	-0.114349	0.0355166	0.860399	0.118045	FALSE	FALSE	FALSE	130518095	0.330193	0.036475	reported	textfile	9	133393482	0.0235708	1.22648e-06	7738	TRUE	reported	textfile	0.00303227	23.529	21.8716
	rs610599	G	A	G	A	-0.114486	0.0356216	0.860206	0.11834	FALSE	FALSE	FALSE	130517655	0.328143	0.0364281	reported	textfile	9	133393042	0.023568	1.18776e-06	7738	TRUE	reported	textfile	0.00304024	23.591	21.8716
	rs611026	C	T	C	T	-0.114442	0.0356173	0.860112	0.118341	FALSE	FALSE	FALSE	130517574	0.328201	0.0364281	reported	textfile	9	133392961	0.0235712	1.20279e-06	7738	TRUE	reported	textfile	0.00303709	23.5665	21.8716
	rs618962	G	T	G	T	-0.108087	0.0314466	0.856075	0.135234	FALSE	FALSE	FALSE	130520222	0.364049	0.0346451	reported	textfile	9	133395609	0.0233434	3.65149e-06	7738	TRUE	reported	textfile	0.00276305	21.4342	21.8716
	rs68173527	T	C	T	C	0.0845804	-0.0147126	0.686891	0.310826	FALSE	FALSE	FALSE	84311882	0.563643	0.025479	reported	textfile	16	84345488	0.0181916	3.32882e-06	7738	TRUE	reported	textfile	0.00278585	21.6115	21.8716
	rs72770359	A	G	A	G	0.119653	-0.0375723	0.104329	0.866253	FALSE	FALSE	FALSE	247198016	0.279683	0.0347559	reported	textfile	1	247361318	0.0268999	8.66323e-06	7738	TRUE	reported	textfile	0.0025504	19.7803	21.8716
	rs75789763	A	G	A	G	-0.166597	-0.0312467	0.0562994	0.957605	FALSE	FALSE	FALSE	129482714	0.593771	0.0585826	reported	textfile	4	130403869	0.0367955	5.96417e-06	7738	TRUE	reported	textfile	0.00264221	20.4943	21.8716
	rs79177454	A	G	A	G	0.116934	0.0538919	0.117426	0.902115	FALSE	FALSE	FALSE	147663324	0.173467	0.039593	reported	textfile	5	147042887	0.0257315	5.50909e-06	7738	TRUE	reported	textfile	0.00266174	20.6462	21.8716
GCST90027461	rs1021015	C	T	C	T	0.0753344	-0.0322451	0.56798	0.400358	FALSE	FALSE	FALSE	60945311	0.179926	0.0240459	reported	textfile	12	61339092	0.0162298	3.45517e-06	7738	TRUE	reported	textfile	0.00277667	21.5401	21.5328
	rs10405432	G	A	G	A	-0.083123	0.0201607	0.346808	0.741356	FALSE	FALSE	FALSE	32508987	0.456836	0.0270953	reported	textfile	19	32999893	0.0177562	2.85003e-06	7738	TRUE	reported	textfile	0.00282413	21.9094	21.5328
	rs10747885	A	T	A	T	0.0748999	0.0278467	0.567763	0.590592	FALSE	TRUE	TRUE	60950662	0.245239	0.0239647	reported	textfile	12	61344443	0.0162314	3.94058e-06	7738	TRUE	reported	textfile	0.00274428	21.2882	21.5328
	rs10779615	G	C	G	C	-0.0798475	-0.015589	0.508391	0.53002	FALSE	TRUE	TRUE	214423091	0.509378	0.0236266	reported	textfile	1	214596434	0.0163543	1.04833e-06	7738	TRUE	reported	textfile	0.0030711	23.8312	21.5328
	rs10784076	T	C	T	C	0.0728435	-0.0241344	0.564117	0.405178	FALSE	FALSE	FALSE	60959905	0.315005	0.0240197	reported	textfile	12	61353686	0.0162471	7.34328e-06	7738	TRUE	reported	textfile	0.00259104	20.0964	21.5328
	rs10877481	G	A	G	A	-0.0752096	0.0359582	0.478202	0.571643	FALSE	FALSE	FALSE	60913480	0.131474	0.02384	reported	textfile	12	61307261	0.016189	3.38899e-06	7738	TRUE	reported	textfile	0.00278143	21.5772	21.5328
	rs10877483	C	A	C	A	-0.0760953	0.0318418	0.43253	0.599417	FALSE	FALSE	FALSE	60921807	0.185474	0.0240481	reported	textfile	12	61315588	0.0162825	2.96203e-06	7738	TRUE	reported	textfile	0.00281463	21.8354	21.5328
	rs10877486	C	A	C	A	0.0751542	-0.0278675	0.567802	0.409416	FALSE	FALSE	FALSE	60946361	0.24489	0.0239648	reported	textfile	12	61340142	0.016236	3.67663e-06	7738	TRUE	reported	textfile	0.00276133	21.4208	21.5328
	rs10877487	G	A	G	A	0.0747093	-0.027914	0.568091	0.409451	FALSE	FALSE	FALSE	60958035	0.244098	0.0239646	reported	textfile	12	61351816	0.0162548	4.30368e-06	7738	TRUE	reported	textfile	0.00272253	21.119	21.5328
	rs10877489	G	A	G	A	0.0730189	-0.0276396	0.564369	0.395822	FALSE	FALSE	FALSE	60960678	0.251721	0.0241145	reported	textfile	12	61354459	0.0162441	6.9536e-06	7738	TRUE	reported	textfile	0.00260446	20.2007	21.5328
	rs11173679	T	C	T	C	0.0740189	-0.0269854	0.564469	0.396018	FALSE	FALSE	FALSE	60962884	0.262982	0.0241076	reported	textfile	12	61356665	0.0162404	5.17202e-06	7738	TRUE	reported	textfile	0.00267731	20.7673	21.5328
	rs113200958	A	G	A	G	-0.0784714	0.0181672	0.505623	0.471632	FALSE	FALSE	FALSE	214424266	0.441809	0.0236201	reported	textfile	1	214597609	0.0163795	1.66096e-06	7738	TRUE	reported	textfile	0.00295738	22.9461	21.5328
	rs113614987	T	C	T	C	-0.0790869	0.0181855	0.504237	0.471614	FALSE	FALSE	FALSE	214424243	0.441354	0.0236203	reported	textfile	1	214597586	0.0163844	1.38634e-06	7738	TRUE	reported	textfile	0.00300202	23.2936	21.5328
	rs11745906	C	T	C	T	-0.0874056	-0.000481463	0.281706	0.672394	FALSE	FALSE	FALSE	84279372	0.984775	0.0252305	reported	textfile	5	83575190	0.0177712	8.7263e-07	7738	TRUE	reported	textfile	0.00311645	24.1843	21.5328
	rs12088748	A	G	A	G	-0.0780278	0.0181039	0.506372	0.471646	FALSE	FALSE	FALSE	214423936	0.44338	0.023619	reported	textfile	1	214597279	0.0163501	1.82129e-06	7738	TRUE	reported	textfile	0.00293463	22.7691	21.5328
	rs12128621	A	T	A	T	-0.0768741	0.0212922	0.50452	0.501729	FALSE	TRUE	TRUE	214411174	0.367832	0.0236437	reported	textfile	1	214584517	0.0161686	1.98907e-06	7738	TRUE	reported	textfile	0.00291286	22.5997	21.5328
	rs12422928	A	T	A	T	-0.0754395	-0.032536	0.432722	0.400653	FALSE	TRUE	TRUE	60936261	0.175998	0.0240441	reported	textfile	12	61330042	0.0162182	3.29458e-06	7738	TRUE	reported	textfile	0.00278837	21.6312	21.5328
	rs12818638	A	G	A	G	-0.0733795	0.027819	0.435373	0.604487	FALSE	FALSE	FALSE	60975950	0.248781	0.0241209	reported	textfile	12	61369731	0.0162477	6.29303e-06	7738	TRUE	reported	textfile	0.00262902	20.3917	21.5328
	rs1383183	G	A	G	A	-0.0746919	0.0323188	0.432357	0.599434	FALSE	FALSE	FALSE	60930947	0.178936	0.024046	reported	textfile	12	61324728	0.016219	4.12041e-06	7738	TRUE	reported	textfile	0.00273326	21.2025	21.5328
	rs1383185	A	C	A	C	-0.0753518	0.031462	0.432618	0.599686	FALSE	FALSE	FALSE	60928399	0.190904	0.0240552	reported	textfile	12	61322180	0.0162231	3.4051e-06	7738	TRUE	reported	textfile	0.00278024	21.5679	21.5328
	rs1383189	T	C	T	C	-0.0761558	0.0317805	0.43244	0.599309	FALSE	FALSE	FALSE	60923232	0.186328	0.0240485	reported	textfile	12	61317013	0.0162838	2.914e-06	7738	TRUE	reported	textfile	0.00281864	21.8666	21.5328
	rs1383190	T	C	T	C	-0.075606	0.0277724	0.432624	0.590749	FALSE	FALSE	FALSE	60920642	0.246678	0.0239736	reported	textfile	12	61314423	0.0162883	3.45486e-06	7738	TRUE	reported	textfile	0.00277667	21.5402	21.5328
	rs145140903	C	T	C	T	-0.115636	0.0139743	0.111675	0.94321	FALSE	FALSE	FALSE	231228880	0.782939	0.0507252	reported	textfile	1	231364626	0.0261618	9.86825e-06	7738	TRUE	reported	textfile	0.00251841	19.5316	21.5328
	rs1542572	T	G	T	G	0.0753841	-0.0286078	0.567627	0.41002	FALSE	FALSE	FALSE	60941634	0.23258	0.0239649	reported	textfile	12	61335415	0.0162306	3.40785e-06	7738	TRUE	reported	textfile	0.00278005	21.5664	21.5328
	rs1542573	G	A	G	A	0.07566	-0.0325885	0.567847	0.400862	FALSE	FALSE	FALSE	60940774	0.175357	0.0240472	reported	textfile	12	61334555	0.0162307	3.1387e-06	7738	TRUE	reported	textfile	0.00280035	21.7243	21.5328
	rs1600544	G	A	G	A	-0.0749167	0.0278239	0.432984	0.590313	FALSE	FALSE	FALSE	60933010	0.24559	0.0239629	reported	textfile	12	61326791	0.0162301	3.91381e-06	7738	TRUE	reported	textfile	0.00274595	21.3011	21.5328
	rs16856918	A	G	A	G	0.171977	0.0890455	0.0552139	0.964477	FALSE	FALSE	FALSE	217095790	0.166171	0.0643107	reported	textfile	2	217960513	0.0365088	2.4703e-06	7738	TRUE	reported	textfile	0.00285939	22.1837	21.5328
	rs2362794	T	A	T	A	-0.075092	-0.0282758	0.433013	0.409624	FALSE	TRUE	TRUE	60934051	0.237999	0.0239625	reported	textfile	12	61327832	0.0162303	3.71638e-06	7738	TRUE	reported	textfile	0.00275871	21.4004	21.5328
	rs2362795	C	G	C	G	-0.0747079	-0.0317627	0.432515	0.400378	FALSE	TRUE	TRUE	60933899	0.18654	0.0240466	reported	textfile	12	61327680	0.016218	4.09506e-06	7738	TRUE	reported	textfile	0.00273477	21.2142	21.5328
	rs2620868	C	T	C	T	-0.0759932	0.0279104	0.438608	0.603071	FALSE	FALSE	FALSE	60976989	0.246804	0.0240992	reported	textfile	12	61370770	0.0162372	2.86622e-06	7738	TRUE	reported	textfile	0.00282274	21.8985	21.5328
	rs35794892	G	A	G	A	-0.0761538	0.0319412	0.432553	0.599453	FALSE	FALSE	FALSE	60916995	0.184228	0.0240548	reported	textfile	12	61310776	0.016283	2.91259e-06	7738	TRUE	reported	textfile	0.00281877	21.8676	21.5328
	rs3819331	C	T	C	T	0.104197	0.0182733	0.159253	0.85558	FALSE	FALSE	FALSE	112228687	0.585053	0.0334665	reported	textfile	11	112099410	0.0227743	4.75773e-06	7738	TRUE	reported	textfile	0.00269785	20.9271	21.5328
	rs4758764	C	T	C	T	-0.0758741	0.027831	0.432744	0.590683	FALSE	FALSE	FALSE	60920495	0.245709	0.023975	reported	textfile	12	61314276	0.0162861	3.18031e-06	7738	TRUE	reported	textfile	0.0027971	21.699	21.5328
	rs55889620	A	G	A	G	0.0746014	-0.0283789	0.567568	0.40951	FALSE	FALSE	FALSE	60955696	0.236301	0.0239629	reported	textfile	12	61349477	0.016251	4.42008e-06	7738	TRUE	reported	textfile	0.00271596	21.0679	21.5328
	rs6581355	T	C	T	C	-0.075298	0.0319771	0.43183	0.599217	FALSE	FALSE	FALSE	60937441	0.183683	0.024052	reported	textfile	12	61331222	0.0162216	3.45335e-06	7738	TRUE	reported	textfile	0.00277679	21.5411	21.5328
	rs7131722	T	A	T	A	0.0740847	0.0317702	0.566547	0.599761	FALSE	TRUE	TRUE	60950853	0.186459	0.0240478	reported	textfile	12	61344634	0.0162709	5.28397e-06	7738	TRUE	reported	textfile	0.00267204	20.7263	21.5328
	rs7131723	C	A	C	A	0.0735139	-0.0317701	0.566647	0.400239	FALSE	FALSE	FALSE	60950855	0.18646	0.0240478	reported	textfile	12	61344636	0.0162657	6.19627e-06	7738	TRUE	reported	textfile	0.00263281	20.4212	21.5328
	rs7136522	C	T	C	T	-0.0757153	0.0262842	0.433232	0.590106	FALSE	FALSE	FALSE	60935858	0.272832	0.0239696	reported	textfile	12	61329639	0.0162308	3.08738e-06	7738	TRUE	reported	textfile	0.00280439	21.7558	21.5328
	rs7139352	A	G	A	G	0.0751379	-0.0284138	0.567739	0.409553	FALSE	FALSE	FALSE	60951968	0.235715	0.0239624	reported	textfile	12	61345749	0.0162547	3.79088e-06	7738	TRUE	reported	textfile	0.00275381	21.3623	21.5328
	rs72987936	A	T	A	T	-0.0755081	-0.00711579	0.364515	0.309639	FALSE	TRUE	FALSE	77408952	0.779579	0.0254256	reported	textfile	18	75120908	0.0170631	9.6343e-06	7738	TRUE	reported	textfile	0.00252432	19.5776	21.5328
	rs7302161	A	G	A	G	0.0730053	-0.0280588	0.564382	0.396009	FALSE	FALSE	FALSE	60959384	0.244516	0.0241102	reported	textfile	12	61353165	0.0162441	6.98088e-06	7738	TRUE	reported	textfile	0.00260349	20.1932	21.5328
	rs7312598	A	G	A	G	0.0751432	-0.0323882	0.567847	0.400653	FALSE	FALSE	FALSE	60949603	0.178068	0.0240496	reported	textfile	12	61343384	0.0162252	3.63421e-06	7738	TRUE	reported	textfile	0.00276419	21.4431	21.5328
	rs73171592	C	G	C	G	0.143446	0.0230854	0.0771743	0.0707021	FALSE	TRUE	FALSE	171329406	0.615287	0.0459374	reported	textfile	3	171047195	0.0311211	4.04064e-06	7738	TRUE	reported	textfile	0.00273809	21.24	21.5328
	rs74537054	G	A	G	A	-0.1567	0.068861	0.0760494	0.921966	FALSE	FALSE	FALSE	109808017	0.118144	0.0440679	reported	textfile	13	110460364	0.0308814	3.88982e-07	7738	TRUE	reported	textfile	0.00331644	25.7414	21.5328
	rs7485487	A	T	A	T	-0.0761628	-0.0317025	0.432531	0.400489	FALSE	TRUE	TRUE	60918343	0.187483	0.0240523	reported	textfile	12	61312124	0.0162828	2.90409e-06	7738	TRUE	reported	textfile	0.0028195	21.8734	21.5328
	rs7488668	A	T	A	T	-0.0749126	-0.0277775	0.432981	0.409645	FALSE	TRUE	TRUE	60933475	0.246386	0.0239632	reported	textfile	12	61327256	0.0162302	3.91877e-06	7738	TRUE	reported	textfile	0.00274561	21.2985	21.5328
	rs795390	G	A	G	A	-0.0733814	0.0273489	0.435718	0.604158	FALSE	FALSE	FALSE	60970734	0.256691	0.024112	reported	textfile	12	61364515	0.0162467	6.28087e-06	7738	TRUE	reported	textfile	0.00262948	20.3953	21.5328
	rs795392	A	T	A	T	-0.0730161	-0.0236536	0.435618	0.40497	FALSE	TRUE	TRUE	60968159	0.324754	0.0240202	reported	textfile	12	61361940	0.0162498	7.011e-06	7738	TRUE	reported	textfile	0.00260244	20.185	21.5328
	rs795393	T	C	T	C	-0.0730632	0.0235548	0.435764	0.595056	FALSE	FALSE	FALSE	60967224	0.326789	0.0240207	reported	textfile	12	61361005	0.0162459	6.88082e-06	7738	TRUE	reported	textfile	0.00260704	20.2208	21.5328
	rs795394	C	T	C	T	-0.0732256	0.0231221	0.435763	0.595775	FALSE	FALSE	FALSE	60966750	0.33607	0.0240365	reported	textfile	12	61360531	0.0162457	6.56357e-06	7738	TRUE	reported	textfile	0.00261867	20.3113	21.5328
	rs795397	T	C	T	C	-0.0733431	0.0275892	0.43557	0.604332	FALSE	FALSE	FALSE	60965863	0.252532	0.0241117	reported	textfile	12	61359644	0.0162432	6.32266e-06	7738	TRUE	reported	textfile	0.00262787	20.3828	21.5328
	rs795398	C	G	C	G	-0.0753132	-0.023936	0.434707	0.404949	FALSE	TRUE	TRUE	60985538	0.319139	0.0240267	reported	textfile	12	61379319	0.0162526	3.58831e-06	7738	TRUE	reported	textfile	0.00276735	21.4676	21.5328
	rs7971423	T	C	T	C	0.0745728	-0.0284114	0.567568	0.409774	FALSE	FALSE	FALSE	60953353	0.235859	0.0239677	reported	textfile	12	61347134	0.0162507	4.45615e-06	7738	TRUE	reported	textfile	0.00271399	21.0525	21.5328
	rs7971428	G	A	G	A	0.0747776	-0.0322661	0.567769	0.400516	FALSE	FALSE	FALSE	60953415	0.179652	0.0240464	reported	textfile	12	61347196	0.016249	4.18485e-06	7738	TRUE	reported	textfile	0.00272944	21.1728	21.5328
	rs7971956	G	T	G	T	0.0752771	-0.0278113	0.56776	0.409567	FALSE	FALSE	FALSE	60944675	0.245829	0.0239641	reported	textfile	12	61338456	0.016233	3.52996e-06	7738	TRUE	reported	textfile	0.00277137	21.4989	21.5328
	rs80343422	G	A	G	A	-0.156491	0.0691227	0.0761024	0.922027	FALSE	FALSE	FALSE	109803975	0.11672	0.044064	reported	textfile	13	110456322	0.030699	3.44025e-07	7738	TRUE	reported	textfile	0.00334692	25.9787	21.5328
	rs977353	A	G	A	G	0.0753908	-0.0286677	0.567633	0.410031	FALSE	FALSE	FALSE	60941130	0.231605	0.0239649	reported	textfile	12	61334911	0.0162309	3.40228e-06	7738	TRUE	reported	textfile	0.00278044	21.5695	21.5328
GCST90027462	rs10134214	C	T	C	T	0.164371	-0.0253616	0.581007	0.408947	FALSE	FALSE	FALSE	85272921	0.289887	0.0239629	reported	textfile	14	85739265	0.0348095	2.33507e-06	7738	TRUE	reported	textfile	0.00287327	22.2917	20.9023
	rs10220585	T	C	T	C	0.164702	-0.025396	0.581202	0.409321	FALSE	FALSE	FALSE	85273504	0.289145	0.0239585	reported	textfile	14	85739848	0.0347972	2.21014e-06	7738	TRUE	reported	textfile	0.00288685	22.3974	20.9023
	rs10433369	A	T	A	T	-0.19189	0.042804	0.213139	0.183257	FALSE	TRUE	FALSE	105461611	0.157826	0.0303054	reported	textfile	3	105180455	0.0428662	7.58787e-06	7738	TRUE	reported	textfile	0.00258299	20.0338	20.9023
	rs10498582	T	G	T	G	0.163988	-0.0252832	0.581008	0.409271	FALSE	FALSE	FALSE	85276277	0.291325	0.0239602	reported	textfile	14	85742621	0.0348531	2.53717e-06	7738	TRUE	reported	textfile	0.0028528	22.1324	20.9023
	rs10808847	A	C	A	C	0.176398	-0.0174582	0.744131	0.238529	FALSE	FALSE	FALSE	81984165	0.528366	0.0276893	reported	textfile	8	82896400	0.0397821	9.24592e-06	7738	TRUE	reported	textfile	0.00253443	19.6562	20.9023
	rs10894222	A	G	A	G	-0.147598	-0.0259482	0.530454	0.492682	FALSE	FALSE	FALSE	130578149	0.268788	0.0234643	reported	textfile	11	130448044	0.0332071	8.79832e-06	7738	TRUE	reported	textfile	0.00254661	19.7509	20.9023
	rs1094970	G	A	G	A	0.164022	0.0271052	0.621253	0.383486	FALSE	FALSE	FALSE	65936279	0.262436	0.0241869	reported	textfile	16	65970182	0.0347501	2.35798e-06	7738	TRUE	reported	textfile	0.00287088	22.2731	20.9023
	rs1094971	G	A	G	A	0.164022	0.0269763	0.621253	0.383561	FALSE	FALSE	FALSE	65936293	0.264624	0.0241825	reported	textfile	16	65970196	0.0347501	2.35798e-06	7738	TRUE	reported	textfile	0.00287088	22.2731	20.9023
	rs1094973	G	T	G	T	0.164693	0.0269822	0.620845	0.383564	FALSE	FALSE	FALSE	65936825	0.264515	0.0241823	reported	textfile	16	65970728	0.0347218	2.10354e-06	7738	TRUE	reported	textfile	0.00289905	22.4923	20.9023
	rs1103775	A	G	A	G	0.15315	0.0203704	0.615082	0.379801	FALSE	FALSE	FALSE	65932526	0.400677	0.0242386	reported	textfile	16	65966429	0.0340882	7.0304e-06	7738	TRUE	reported	textfile	0.00260175	20.1796	20.9023
	rs111457769	C	T	C	T	0.260543	0.0562429	0.112372	0.880031	FALSE	FALSE	FALSE	75066981	0.122567	0.0364246	reported	textfile	7	74482794	0.0564797	3.96835e-06	7738	TRUE	reported	textfile	0.00274254	21.2746	20.9023
	rs113945292	A	G	A	G	0.194091	0.016146	0.181054	0.838364	FALSE	FALSE	FALSE	67215122	0.613484	0.0319656	reported	textfile	18	64882359	0.0438689	9.67386e-06	7738	TRUE	reported	textfile	0.00252331	19.5697	20.9023
	rs11850304	G	A	G	A	0.159862	-0.0273516	0.582818	0.408525	FALSE	FALSE	FALSE	85261545	0.253924	0.0239744	reported	textfile	14	85727889	0.0349529	4.79325e-06	7738	TRUE	reported	textfile	0.00269602	20.9128	20.9023
	rs12431581	A	G	A	G	0.160795	-0.0269233	0.582984	0.408673	FALSE	FALSE	FALSE	85262974	0.26135	0.0239701	reported	textfile	14	85729318	0.0349274	4.1505e-06	7738	TRUE	reported	textfile	0.00273147	21.1885	20.9023
	rs12435232	A	G	A	G	0.16005	-0.0266413	0.582593	0.408253	FALSE	FALSE	FALSE	85260339	0.266523	0.0239773	reported	textfile	14	85726683	0.0349431	4.64312e-06	7738	TRUE	reported	textfile	0.00270386	20.9738	20.9023
	rs12435574	A	C	A	C	0.164337	-0.0253619	0.580991	0.408947	FALSE	FALSE	FALSE	85272904	0.289881	0.0239629	reported	textfile	14	85739248	0.034807	2.34261e-06	7738	TRUE	reported	textfile	0.0028725	22.2856	20.9023
	rs12436074	A	G	A	G	0.159959	-0.0269118	0.582774	0.408652	FALSE	FALSE	FALSE	85261560	0.261562	0.0239705	reported	textfile	14	85727904	0.0349441	4.70446e-06	7738	TRUE	reported	textfile	0.00270064	20.9487	20.9023
	rs12638646	A	G	A	G	-0.180901	-0.0106813	0.287611	0.720233	FALSE	FALSE	FALSE	105403370	0.684413	0.0262796	reported	textfile	3	105122214	0.0391484	3.82085e-06	7738	TRUE	reported	textfile	0.00275187	21.3472	20.9023
	rs12781290	A	G	A	G	0.17085	-0.0413029	0.334687	0.717613	FALSE	FALSE	FALSE	71231338	0.117167	0.0263617	reported	textfile	10	72991095	0.0375839	5.4718e-06	7738	TRUE	reported	textfile	0.00266342	20.6592	20.9023
	rs12781902	A	G	A	G	0.167487	-0.0419335	0.331228	0.717731	FALSE	FALSE	FALSE	71231615	0.111467	0.0263462	reported	textfile	10	72991372	0.0375701	8.27294e-06	7738	TRUE	reported	textfile	0.00256174	19.8685	20.9023
	rs12879855	T	C	T	C	0.161059	-0.0269966	0.583073	0.408693	FALSE	FALSE	FALSE	85264634	0.260029	0.0239688	reported	textfile	14	85730978	0.03493	4.00931e-06	7738	TRUE	reported	textfile	0.00274001	21.255	20.9023
	rs12894284	G	T	G	T	0.159862	-0.0273485	0.582818	0.408526	FALSE	FALSE	FALSE	85261682	0.253977	0.0239743	reported	textfile	14	85728026	0.0349529	4.79325e-06	7738	TRUE	reported	textfile	0.00269602	20.9128	20.9023
	rs1375575	C	T	C	T	0.164023	-0.0258052	0.581023	0.40885	FALSE	FALSE	FALSE	85274151	0.281575	0.023965	reported	textfile	14	85740495	0.0348557	2.52901e-06	7738	TRUE	reported	textfile	0.00285359	22.1386	20.9023
	rs1839312	T	G	T	G	0.161234	-0.0269036	0.583672	0.408653	FALSE	FALSE	FALSE	85261796	0.261706	0.0239704	reported	textfile	14	85728140	0.0349852	4.05322e-06	7738	TRUE	reported	textfile	0.00273732	21.234	20.9023
	rs1839313	G	A	G	A	0.160737	-0.0271062	0.583462	0.408482	FALSE	FALSE	FALSE	85261333	0.258253	0.0239765	reported	textfile	14	85727677	0.0349568	4.26246e-06	7738	TRUE	reported	textfile	0.00272493	21.1376	20.9023
	rs1867082	G	A	G	A	0.164618	-0.0254644	0.581186	0.409331	FALSE	FALSE	FALSE	85270825	0.287852	0.0239587	reported	textfile	14	85737169	0.0347925	2.22956e-06	7738	TRUE	reported	textfile	0.0028847	22.3806	20.9023
	rs1887294	C	A	C	A	0.161614	-0.0270211	0.582729	0.40869	FALSE	FALSE	FALSE	85266456	0.259587	0.0239683	reported	textfile	14	85732800	0.0348852	3.60869e-06	7738	TRUE	reported	textfile	0.00276595	21.4567	20.9023
	rs1900922	T	C	T	C	0.161161	-0.0270284	0.583058	0.40869	FALSE	FALSE	FALSE	85266845	0.259457	0.0239683	reported	textfile	14	85733189	0.034907	3.89601e-06	7738	TRUE	reported	textfile	0.00274708	21.31	20.9023
	rs2010151	C	A	C	A	-0.154264	0.0011659	0.420012	0.550947	FALSE	FALSE	FALSE	31806327	0.960638	0.0236234	reported	textfile	5	31806434	0.0346348	8.42772e-06	7738	TRUE	reported	textfile	0.00255719	19.8331	20.9023
	rs2099860	G	T	G	T	0.160781	-0.027143	0.582969	0.408583	FALSE	FALSE	FALSE	85263288	0.257558	0.0239741	reported	textfile	14	85729632	0.0349271	4.15757e-06	7738	TRUE	reported	textfile	0.00273104	21.1852	20.9023
	rs2372886	C	T	C	T	0.163543	-0.025091	0.580814	0.409231	FALSE	FALSE	FALSE	85275671	0.295061	0.0239627	reported	textfile	14	85742015	0.0348679	2.72703e-06	7738	TRUE	reported	textfile	0.00283498	21.9938	20.9023
	rs254348	G	A	G	A	0.156615	0.0249076	0.620697	0.384485	FALSE	FALSE	FALSE	65946886	0.302627	0.024163	reported	textfile	16	65980789	0.0346509	6.19013e-06	7738	TRUE	reported	textfile	0.00263308	20.4233	20.9023
	rs254350	G	A	G	A	0.157596	0.0250088	0.619708	0.384499	FALSE	FALSE	FALSE	65945747	0.300676	0.0241634	reported	textfile	16	65979650	0.0345733	5.15656e-06	7738	TRUE	reported	textfile	0.00267803	20.7729	20.9023
	rs254351	G	C	G	C	0.158581	-0.0249536	0.619482	0.615473	FALSE	TRUE	FALSE	65944484	0.301858	0.0241691	reported	textfile	16	65978387	0.0345919	4.55428e-06	7738	TRUE	reported	textfile	0.00270861	21.0107	20.9023
	rs254371	T	C	T	C	0.154472	0.017306	0.621572	0.368406	FALSE	FALSE	FALSE	65909747	0.478581	0.0244232	reported	textfile	16	65943650	0.0348088	9.09138e-06	7738	TRUE	reported	textfile	0.00253857	19.6883	20.9023
	rs2592994	T	C	T	C	0.154966	-0.0174303	0.437869	0.435183	FALSE	FALSE	FALSE	85404182	0.467732	0.0240029	reported	textfile	9	88019097	0.0350142	9.60904e-06	7738	TRUE	reported	textfile	0.00252498	19.5827	20.9023
	rs34155469	T	A	T	A	0.159927	0.0269986	0.583462	0.591313	FALSE	TRUE	FALSE	85264070	0.259995	0.0239688	reported	textfile	14	85730414	0.0349586	4.76771e-06	7738	TRUE	reported	textfile	0.00269733	20.923	20.9023
	rs35006616	A	G	A	G	0.155262	0.00210424	0.478529	0.45012	FALSE	FALSE	FALSE	16029003	0.929333	0.0237274	reported	textfile	7	16068628	0.0341787	5.55482e-06	7738	TRUE	reported	textfile	0.00265971	20.6304	20.9023
	rs35048084	C	G	C	G	0.160382	0.0270465	0.583222	0.591304	FALSE	TRUE	FALSE	85264060	0.259154	0.0239691	reported	textfile	14	85730404	0.0349445	4.44069e-06	7738	TRUE	reported	textfile	0.00271484	21.0592	20.9023
	rs35145811	C	T	C	T	0.161819	-0.0619826	0.40116	0.627694	FALSE	FALSE	FALSE	36707475	0.011231	0.0244466	reported	textfile	2	36934618	0.0361109	7.42335e-06	7738	TRUE	reported	textfile	0.00258838	20.0757	20.9023
	rs380112	A	G	A	G	0.151435	0.0182467	0.614807	0.380062	FALSE	FALSE	FALSE	65924683	0.451422	0.0242306	reported	textfile	16	65958586	0.0342107	9.57525e-06	7738	TRUE	reported	textfile	0.00252582	19.5892	20.9023
	rs4383249	G	T	G	T	0.195242	0.0144497	0.182145	0.838521	FALSE	FALSE	FALSE	67213061	0.649422	0.031788	reported	textfile	18	64880298	0.0436496	7.71507e-06	7738	TRUE	reported	textfile	0.00257891	20.002	20.9023
	rs4470990	C	A	C	A	0.181978	-0.012976	0.774211	0.221383	FALSE	FALSE	FALSE	82000608	0.647411	0.0283715	reported	textfile	8	82912843	0.0411097	9.57128e-06	7738	TRUE	reported	textfile	0.00252593	19.5901	20.9023
	rs4581805	C	T	C	T	0.195076	0.0143674	0.181862	0.83849	FALSE	FALSE	FALSE	67212841	0.651049	0.0317649	reported	textfile	18	64880078	0.0437134	8.09636e-06	7738	TRUE	reported	textfile	0.00256705	19.9098	20.9023
	rs59556463	G	A	G	A	0.193988	0.0132057	0.181606	0.838092	FALSE	FALSE	FALSE	67211710	0.676985	0.0317002	reported	textfile	18	64878947	0.043737	9.19306e-06	7738	TRUE	reported	textfile	0.00253583	19.6671	20.9023
	rs62043566	C	T	C	T	0.155445	0.0146153	0.408328	0.599159	FALSE	FALSE	FALSE	93137549	0.542166	0.0239774	reported	textfile	15	93680778	0.0348289	8.07811e-06	7738	TRUE	reported	textfile	0.00256761	19.9141	20.9023
	rs7149974	T	G	T	G	0.161579	-0.0270211	0.582714	0.40869	FALSE	FALSE	FALSE	85266472	0.259587	0.0239683	reported	textfile	14	85732816	0.0348826	3.6201e-06	7738	TRUE	reported	textfile	0.00276516	21.4506	20.9023
	rs7160419	G	A	G	A	0.160939	-0.0276	0.583282	0.408526	FALSE	FALSE	FALSE	85267702	0.249623	0.0239737	reported	textfile	14	85734046	0.0349329	4.08319e-06	7738	TRUE	reported	textfile	0.00273549	21.2198	20.9023
	rs7202786	G	C	G	C	0.159637	-0.0294711	0.618465	0.607134	FALSE	TRUE	FALSE	65960673	0.221166	0.0240888	reported	textfile	16	65994576	0.0345858	3.91832e-06	7738	TRUE	reported	textfile	0.00274567	21.299	20.9023
	rs72727948	A	C	A	C	-0.306134	0.100263	0.0684841	0.95351	FALSE	FALSE	FALSE	133951366	0.0680581	0.0549501	reported	textfile	8	134963609	0.0692836	9.93596e-06	7738	TRUE	reported	textfile	0.00251674	19.5187	20.9023
	rs733979	A	C	A	C	0.159585	-0.0270215	0.582595	0.40869	FALSE	FALSE	FALSE	85266126	0.25958	0.0239684	reported	textfile	14	85732470	0.0349153	4.86239e-06	7738	TRUE	reported	textfile	0.00269248	20.8853	20.9023
	rs8011992	G	A	G	A	0.164256	-0.0258191	0.581112	0.409201	FALSE	FALSE	FALSE	85274819	0.281232	0.0239608	reported	textfile	14	85741163	0.0348635	2.46003e-06	7738	TRUE	reported	textfile	0.00286041	22.1916	20.9023
	rs8022384	G	A	G	A	0.160147	-0.0273059	0.582309	0.408173	FALSE	FALSE	FALSE	85259501	0.25479	0.0239779	reported	textfile	14	85725845	0.0349559	4.6187e-06	7738	TRUE	reported	textfile	0.00270515	20.9838	20.9023
	rs8022603	A	G	A	G	0.160111	-0.0269126	0.582294	0.408284	FALSE	FALSE	FALSE	85259345	0.261656	0.023976	reported	textfile	14	85725689	0.0349578	4.64708e-06	7738	TRUE	reported	textfile	0.00270364	20.9721	20.9023
	rs961166	C	G	C	G	0.164023	0.0253898	0.581023	0.590677	FALSE	TRUE	FALSE	85276014	0.289264	0.0239586	reported	textfile	14	85742358	0.0348557	2.52901e-06	7738	TRUE	reported	textfile	0.00285359	22.1386	20.9023
	rs9947120	T	A	T	A	0.194089	-0.0143728	0.181621	0.161506	FALSE	TRUE	FALSE	67212376	0.650506	0.0317237	reported	textfile	18	64879613	0.0437385	9.10186e-06	7738	TRUE	reported	textfile	0.00253829	19.6862	20.9023
GCST90027463	rs10733468	C	A	C	A	-0.230845	-0.0421929	0.87542	0.143601	FALSE	FALSE	FALSE	33233619	0.209865	0.0336484	reported	textfile	9	33233617	0.0467534	7.91316e-07	7738	TRUE	reported	textfile	0.00314065	24.3726	23.6274
	rs10738912	G	A	G	A	-0.230875	-0.042225	0.875431	0.143601	FALSE	FALSE	FALSE	33233496	0.209516	0.0336482	reported	textfile	9	33233494	0.0467573	7.90369e-07	7738	TRUE	reported	textfile	0.00314094	24.3749	23.6274
	rs1197968	C	T	C	T	-0.228825	-0.0205555	0.879979	0.158336	FALSE	FALSE	FALSE	33279560	0.524509	0.0322991	reported	textfile	9	33279558	0.0460603	6.76675e-07	7738	TRUE	reported	textfile	0.00317937	24.6741	23.6274
	rs1198239	C	T	C	T	0.223289	0.0323101	0.118416	0.834102	FALSE	FALSE	FALSE	33358135	0.308939	0.0317559	reported	textfile	9	33358133	0.0473434	2.40077e-06	7738	TRUE	reported	textfile	0.00286642	22.2384	23.6274
	rs1630171	G	A	G	A	0.221349	0.0420516	0.124648	0.85636	FALSE	FALSE	FALSE	33234041	0.211402	0.0336489	reported	textfile	9	33234039	0.0467976	2.24616e-06	7738	TRUE	reported	textfile	0.00288287	22.3664	23.6274
	rs1702985	C	T	C	T	0.223468	0.0390756	0.125774	0.829853	FALSE	FALSE	FALSE	33235188	0.2147	0.0314937	reported	textfile	9	33235186	0.046237	1.34425e-06	7738	TRUE	reported	textfile	0.00300963	23.3528	23.6274
	rs1810052	A	G	A	G	-0.231195	-0.0340315	0.876312	0.142815	FALSE	FALSE	FALSE	33231533	0.313305	0.033751	reported	textfile	9	33231531	0.0470381	8.87544e-07	7738	TRUE	reported	textfile	0.00311225	24.1516	23.6274
	rs35315823	C	G	C	G	0.224235	-0.0354376	0.114662	0.141313	FALSE	TRUE	FALSE	33326565	0.294547	0.033808	reported	textfile	9	33326563	0.047864	2.80188e-06	7738	TRUE	reported	textfile	0.00282833	21.942	23.6274
	rs3758271	C	T	C	T	0.226365	0.0345194	0.115789	0.858739	FALSE	FALSE	FALSE	33263210	0.307244	0.0338086	reported	textfile	9	33263208	0.0465736	1.17163e-06	7738	TRUE	reported	textfile	0.00304359	23.6171	23.6274
	rs3860973	T	C	T	C	-0.231852	-0.034234	0.876289	0.142824	FALSE	FALSE	FALSE	33231855	0.310406	0.033749	reported	textfile	9	33231853	0.0470401	8.27256e-07	7738	TRUE	reported	textfile	0.00312965	24.2869	23.6274
	rs3860974	C	T	C	T	-0.233313	-0.0341309	0.876679	0.142818	FALSE	FALSE	FALSE	33231887	0.311862	0.0337487	reported	textfile	9	33231885	0.0470989	7.28266e-07	7738	TRUE	reported	textfile	0.0031612	24.5326	23.6274
	rs3866501	T	C	T	C	-0.230773	-0.0379688	0.876438	0.142226	FALSE	FALSE	FALSE	33232376	0.261143	0.0337893	reported	textfile	9	33232374	0.0470472	9.3362e-07	7738	TRUE	reported	textfile	0.00309974	24.0542	23.6274
	rs4008957	C	A	C	A	-0.230773	-0.0389645	0.876438	0.142219	FALSE	FALSE	FALSE	33232182	0.248867	0.0337909	reported	textfile	9	33232180	0.0470472	9.3362e-07	7738	TRUE	reported	textfile	0.00309974	24.0542	23.6274
	rs4075219	G	C	G	C	0.142652	-0.00524844	0.676017	0.738421	FALSE	TRUE	FALSE	204281766	0.84423	0.0267115	reported	textfile	1	204250894	0.0321148	8.916e-06	7738	TRUE	reported	textfile	0.00254338	19.7257	23.6274
	rs474884	C	T	C	T	0.226967	0.0407999	0.126064	0.829342	FALSE	FALSE	FALSE	33253835	0.193653	0.0313882	reported	textfile	9	33253833	0.0453862	5.70953e-07	7738	TRUE	reported	textfile	0.00322142	25.0015	23.6274
	rs477706	C	A	C	A	0.230321	0.0390239	0.122735	0.85793	FALSE	FALSE	FALSE	33229482	0.248696	0.0338302	reported	textfile	9	33229480	0.0471637	1.04251e-06	7738	TRUE	reported	textfile	0.00307246	23.8418	23.6274
	rs480583	A	G	A	G	0.218431	0.0279516	0.124909	0.832866	FALSE	FALSE	FALSE	33245078	0.376683	0.0316186	reported	textfile	9	33245076	0.0455896	1.65749e-06	7738	TRUE	reported	textfile	0.00295789	22.9501	23.6274
	rs4878529	A	G	A	G	-0.230245	-0.0384954	0.876737	0.1422	FALSE	FALSE	FALSE	33229379	0.25483	0.0338065	reported	textfile	9	33229377	0.0471015	1.0173e-06	7738	TRUE	reported	textfile	0.00307853	23.889	23.6274
	rs4879678	G	A	G	A	-0.229042	-0.0419574	0.874905	0.143658	FALSE	FALSE	FALSE	33233824	0.212425	0.0336487	reported	textfile	9	33233822	0.0467015	9.37174e-07	7738	TRUE	reported	textfile	0.00309879	24.0467	23.6274
	rs4879679	T	C	T	C	-0.221882	-0.0385203	0.875338	0.14343	FALSE	FALSE	FALSE	33234021	0.252426	0.0336576	reported	textfile	9	33234019	0.0467881	2.11334e-06	7738	TRUE	reported	textfile	0.00289791	22.4834	23.6274
	rs509120	T	C	T	C	0.222616	0.0389028	0.125785	0.829838	FALSE	FALSE	FALSE	33234950	0.216652	0.031488	reported	textfile	9	33234948	0.0462207	1.46191e-06	7738	TRUE	reported	textfile	0.0029889	23.1914	23.6274
	rs510926	A	C	A	C	0.222765	0.0387103	0.125441	0.829832	FALSE	FALSE	FALSE	33234767	0.218872	0.0314838	reported	textfile	9	33234765	0.0463021	1.50096e-06	7738	TRUE	reported	textfile	0.00298241	23.1409	23.6274
	rs511814	T	C	T	C	0.222078	0.0386052	0.125726	0.829826	FALSE	FALSE	FALSE	33234666	0.220053	0.0314788	reported	textfile	9	33234664	0.0462646	1.58526e-06	7738	TRUE	reported	textfile	0.00296889	23.0357	23.6274
	rs515252	T	A	T	A	0.222078	-0.0386055	0.125726	0.170176	FALSE	TRUE	FALSE	33234652	0.220039	0.0314781	reported	textfile	9	33234650	0.0462646	1.58526e-06	7738	TRUE	reported	textfile	0.00296889	23.0357	23.6274
	rs542912	G	C	G	C	0.225751	-0.0422298	0.125743	0.170932	FALSE	TRUE	FALSE	33252785	0.17816	0.031364	reported	textfile	9	33252783	0.045375	6.51733e-07	7738	TRUE	reported	textfile	0.00318868	24.7465	23.6274
	rs557948	T	C	T	C	0.232086	0.0385249	0.122322	0.857801	FALSE	FALSE	FALSE	33230473	0.254449	0.0338053	reported	textfile	9	33230471	0.0472324	8.93758e-07	7738	TRUE	reported	textfile	0.00311054	24.1382	23.6274
	rs55931969	T	C	T	C	0.226801	0.0325751	0.116414	0.861682	FALSE	FALSE	FALSE	33230248	0.341374	0.0342372	reported	textfile	9	33230246	0.0484833	2.89794e-06	7738	TRUE	reported	textfile	0.00282001	21.8773	23.6274
	rs587608	G	C	G	C	-0.22619	0.0319832	0.879981	0.834204	FALSE	TRUE	FALSE	33296725	0.313817	0.0317531	reported	textfile	9	33296723	0.0461103	9.32331e-07	7738	TRUE	reported	textfile	0.00310009	24.0568	23.6274
	rs589212	G	C	G	C	-0.224608	0.0318623	0.881421	0.834233	FALSE	TRUE	FALSE	33334018	0.315666	0.0317542	reported	textfile	9	33334016	0.047221	1.96956e-06	7738	TRUE	reported	textfile	0.0029153	22.6187	23.6274
	rs599279	G	C	G	C	-0.223416	0.0318516	0.881823	0.834203	FALSE	TRUE	FALSE	33349703	0.315797	0.0317522	reported	textfile	9	33349701	0.0473445	2.37072e-06	7738	TRUE	reported	textfile	0.00286954	22.2627	23.6274
	rs61817056	T	C	T	C	-0.146109	0.00558837	0.285203	0.757717	FALSE	FALSE	FALSE	204272379	0.838161	0.027361	reported	textfile	1	204241507	0.0326057	7.42592e-06	7738	TRUE	reported	textfile	0.00258829	20.075	23.6274
	rs642157	A	T	A	T	-0.22034	0.0222738	0.885388	0.852925	FALSE	TRUE	FALSE	33344254	0.504319	0.0333584	reported	textfile	9	33344252	0.0484375	5.39126e-06	7738	TRUE	reported	textfile	0.00266707	20.6876	23.6274
	rs696286	G	A	G	A	0.229453	0.0305712	0.120756	0.834361	FALSE	FALSE	FALSE	33249061	0.335725	0.0317575	reported	textfile	9	33249059	0.0459944	6.07841e-07	7738	TRUE	reported	textfile	0.00320593	24.8809	23.6274
	rs697530	G	A	G	A	-0.227508	-0.0317547	0.880574	0.165774	FALSE	FALSE	FALSE	33317688	0.31729	0.0317533	reported	textfile	9	33317686	0.0466073	1.05346e-06	7738	TRUE	reported	textfile	0.00306988	23.8217	23.6274
	rs7028796	A	G	A	G	-0.22945	-0.0422359	0.875042	0.1436	FALSE	FALSE	FALSE	33233242	0.209398	0.0336481	reported	textfile	9	33233240	0.0467006	8.95922e-07	7738	TRUE	reported	textfile	0.00310992	24.1334	23.6274
	rs7044562	C	T	C	T	-0.230875	-0.0422358	0.875431	0.1436	FALSE	FALSE	FALSE	33233024	0.209399	0.0336481	reported	textfile	9	33233022	0.0467573	7.90369e-07	7738	TRUE	reported	textfile	0.00314094	24.3749	23.6274
	rs706102	A	G	A	G	0.233361	0.0381902	0.122346	0.854513	FALSE	FALSE	FALSE	33228900	0.254251	0.0334976	reported	textfile	9	33228898	0.0472597	7.89878e-07	7738	TRUE	reported	textfile	0.00314108	24.376	23.6274
	rs706111	A	T	A	T	0.231567	-0.0277416	0.122654	0.166777	FALSE	TRUE	FALSE	33244485	0.380782	0.031652	reported	textfile	9	33244483	0.0457302	4.11065e-07	7738	TRUE	reported	textfile	0.0033028	25.6351	23.6274
	rs706114	G	C	G	C	0.225751	-0.0419272	0.125743	0.170867	FALSE	TRUE	FALSE	33251637	0.181367	0.0313696	reported	textfile	9	33251635	0.045375	6.51733e-07	7738	TRUE	reported	textfile	0.00318868	24.7465	23.6274
	rs706115	G	C	G	C	0.226589	-0.0420586	0.12596	0.170908	FALSE	TRUE	FALSE	33253607	0.179949	0.0313656	reported	textfile	9	33253605	0.0453851	5.95744e-07	7738	TRUE	reported	textfile	0.00321089	24.9195	23.6274
	rs706119	T	G	T	G	-0.227749	-0.0305759	0.878453	0.165639	FALSE	FALSE	FALSE	33259779	0.335643	0.031757	reported	textfile	9	33259777	0.0458403	6.75367e-07	7738	TRUE	reported	textfile	0.00317985	24.6778	23.6274
	rs706120	T	C	T	C	-0.228968	-0.0308906	0.879322	0.165705	FALSE	FALSE	FALSE	33260386	0.330604	0.0317511	reported	textfile	9	33260384	0.0459802	6.36825e-07	7738	TRUE	reported	textfile	0.0031944	24.7911	23.6274
	rs706121	T	C	T	C	-0.228968	-0.030769	0.879322	0.165695	FALSE	FALSE	FALSE	33260634	0.332526	0.0317521	reported	textfile	9	33260632	0.0459802	6.36825e-07	7738	TRUE	reported	textfile	0.0031944	24.7911	23.6274
	rs706129	G	A	G	A	-0.227508	-0.0317553	0.880574	0.165774	FALSE	FALSE	FALSE	33317177	0.317281	0.0317533	reported	textfile	9	33317175	0.0466073	1.05346e-06	7738	TRUE	reported	textfile	0.00306988	23.8217	23.6274
	rs706133	G	A	G	A	-0.225581	-0.0317037	0.881467	0.165787	FALSE	FALSE	FALSE	33343051	0.318077	0.0317539	reported	textfile	9	33343049	0.0472193	1.77656e-06	7738	TRUE	reported	textfile	0.00294075	22.8167	23.6274
	rs830574	T	C	T	C	0.223435	0.0414202	0.121705	0.854977	FALSE	FALSE	FALSE	33228191	0.217174	0.0335637	reported	textfile	9	33228189	0.0473844	2.41263e-06	7738	TRUE	reported	textfile	0.00286521	22.229	23.6274
	rs830575	C	T	C	T	-0.23431	-0.0191419	0.884566	0.156114	FALSE	FALSE	FALSE	33291522	0.556159	0.0325235	reported	textfile	9	33291520	0.0468581	5.72045e-07	7738	TRUE	reported	textfile	0.00322094	24.9977	23.6274
	rs830576	G	A	G	A	-0.235626	-0.0189894	0.884439	0.156105	FALSE	FALSE	FALSE	33290534	0.559326	0.0325248	reported	textfile	9	33290532	0.0468144	4.82381e-07	7738	TRUE	reported	textfile	0.00326317	25.3265	23.6274
	rs830577	T	G	T	G	-0.235787	-0.0294088	0.884014	0.163436	FALSE	FALSE	FALSE	33288612	0.357627	0.0319697	reported	textfile	9	33288610	0.046806	4.71531e-07	7738	TRUE	reported	textfile	0.00326878	25.3702	23.6274
	rs830578	C	T	C	T	-0.224608	-0.0317553	0.881421	0.165795	FALSE	FALSE	FALSE	33337651	0.317242	0.0317508	reported	textfile	9	33337649	0.047221	1.96956e-06	7738	TRUE	reported	textfile	0.0029153	22.6187	23.6274
	rs831265	T	A	T	A	0.222909	-0.0325779	0.118348	0.165761	FALSE	TRUE	FALSE	33362101	0.305231	0.0317747	reported	textfile	9	33362099	0.0473386	2.49138e-06	7738	TRUE	reported	textfile	0.00285728	22.1673	23.6274
	rs831266	T	C	T	C	0.222909	0.0323585	0.118348	0.834236	FALSE	FALSE	FALSE	33359577	0.308334	0.0317637	reported	textfile	9	33359575	0.0473386	2.49138e-06	7738	TRUE	reported	textfile	0.00285728	22.1673	23.6274
	rs831269	G	T	G	T	-0.2274	-0.030702	0.879634	0.165674	FALSE	FALSE	FALSE	33272674	0.333587	0.0317526	reported	textfile	9	33272672	0.0459313	7.38788e-07	7738	TRUE	reported	textfile	0.00315763	24.5048	23.6274
	rs831270	G	A	G	A	-0.2274	-0.0324193	0.879634	0.165654	FALSE	FALSE	FALSE	33272426	0.306896	0.0317289	reported	textfile	9	33272424	0.0459313	7.38788e-07	7738	TRUE	reported	textfile	0.00315763	24.5048	23.6274
	rs831271	T	G	T	G	-0.2274	-0.030517	0.879634	0.165674	FALSE	FALSE	FALSE	33270750	0.336503	0.0317522	reported	textfile	9	33270748	0.0459313	7.38788e-07	7738	TRUE	reported	textfile	0.00315763	24.5048	23.6274
	rs831273	A	C	A	C	-0.223177	-0.0342462	0.883856	0.141209	FALSE	FALSE	FALSE	33269673	0.311123	0.0338111	reported	textfile	9	33269671	0.0465579	1.63874e-06	7738	TRUE	reported	textfile	0.00296071	22.9721	23.6274
	rs831274	C	G	C	G	-0.230885	0.0205994	0.878158	0.841657	FALSE	TRUE	FALSE	33283288	0.523638	0.0323002	reported	textfile	9	33283286	0.0461085	5.51645e-07	7738	TRUE	reported	textfile	0.00322995	25.0679	23.6274
	rs831275	C	T	C	T	-0.223718	-0.0229609	0.884053	0.133875	FALSE	FALSE	FALSE	33282673	0.50621	0.0345406	reported	textfile	9	33282671	0.0467072	1.66955e-06	7738	TRUE	reported	textfile	0.0029561	22.9362	23.6274
	rs831277	T	A	T	A	-0.227508	0.0315836	0.880574	0.834149	FALSE	TRUE	FALSE	33314975	0.319876	0.0317515	reported	textfile	9	33314973	0.0466073	1.05346e-06	7738	TRUE	reported	textfile	0.00306988	23.8217	23.6274
	rs831287	T	C	T	C	-0.226288	-0.0316189	0.879924	0.165763	FALSE	FALSE	FALSE	33294093	0.319407	0.0317562	reported	textfile	9	33294091	0.0460973	9.15756e-07	7738	TRUE	reported	textfile	0.00310451	24.0913	23.6274
	rs844216	G	A	G	A	-0.225616	-0.0318063	0.881467	0.165794	FALSE	FALSE	FALSE	33336717	0.316467	0.031751	reported	textfile	9	33336715	0.0472138	1.7651e-06	7738	TRUE	reported	textfile	0.00294234	22.8291	23.6274
	rs891671	A	C	A	C	-0.231314	-0.0341148	0.876357	0.142817	FALSE	FALSE	FALSE	33232273	0.312088	0.0337486	reported	textfile	9	33232271	0.0470344	8.744e-07	7738	TRUE	reported	textfile	0.00311594	24.1802	23.6274
GCST90027464	rs10789290	A	G	A	G	0.0910665	0.0220673	0.62141	0.285666	FALSE	FALSE	FALSE	69402088	0.394724	0.0259286	reported	textfile	1	69867771	0.0202902	7.18307e-06	7738	TRUE	reported	textfile	0.00259649	20.1387	20.3343
	rs10789291	C	T	C	T	0.0910935	0.0233068	0.621405	0.28568	FALSE	FALSE	FALSE	69403159	0.368781	0.0259322	reported	textfile	1	69868842	0.0202901	7.13756e-06	7738	TRUE	reported	textfile	0.00259805	20.1509	20.3343
	rs10889815	T	G	T	G	0.0911539	0.0226054	0.621285	0.285596	FALSE	FALSE	FALSE	69391101	0.383359	0.0259319	reported	textfile	1	69856784	0.0202908	7.04304e-06	7738	TRUE	reported	textfile	0.00260131	20.1762	20.3343
	rs10889816	C	T	C	T	0.091206	0.0226044	0.621354	0.2856	FALSE	FALSE	FALSE	69393550	0.383385	0.0259321	reported	textfile	1	69859233	0.0202889	6.94496e-06	7738	TRUE	reported	textfile	0.00260476	20.2031	20.3343
	rs10889817	T	C	T	C	0.0912718	0.0226054	0.621384	0.285596	FALSE	FALSE	FALSE	69393620	0.383361	0.0259319	reported	textfile	1	69859303	0.0202906	6.8522e-06	7738	TRUE	reported	textfile	0.00260808	20.2288	20.3343
	rs11209444	T	C	T	C	0.0911738	0.0226053	0.621364	0.285596	FALSE	FALSE	FALSE	69394478	0.383362	0.0259319	reported	textfile	1	69860161	0.0202891	6.99858e-06	7738	TRUE	reported	textfile	0.00260288	20.1884	20.3343
	rs11209445	G	A	G	A	0.0915904	0.0226053	0.621444	0.285596	FALSE	FALSE	FALSE	69395322	0.383362	0.0259319	reported	textfile	1	69861005	0.020289	6.35302e-06	7738	TRUE	reported	textfile	0.00262668	20.3735	20.3343
	rs11209447	T	G	T	G	0.0910935	0.0229959	0.621405	0.285781	FALSE	FALSE	FALSE	69402932	0.375149	0.0259293	reported	textfile	1	69868615	0.0202901	7.13756e-06	7738	TRUE	reported	textfile	0.00259805	20.1509	20.3343
	rs112959517	T	A	T	A	-0.163818	-0.0215534	0.0836625	0.127762	FALSE	TRUE	FALSE	46871017	0.548771	0.0359462	reported	textfile	4	46873034	0.0364331	6.91067e-06	7738	TRUE	reported	textfile	0.00260597	20.2124	20.3343
	rs11761901	A	G	A	G	-0.111105	0.0172847	0.217568	0.735151	FALSE	FALSE	FALSE	116251632	0.514748	0.0265322	reported	textfile	7	115891686	0.0239709	3.5696e-06	7738	TRUE	reported	textfile	0.00276864	21.4776	20.3343
	rs12028904	C	T	C	T	0.0889731	0.0213674	0.544244	0.379523	FALSE	FALSE	FALSE	69408926	0.376629	0.0241679	reported	textfile	1	69874609	0.0198303	7.23286e-06	7738	TRUE	reported	textfile	0.00259479	20.1255	20.3343
	rs12111746	A	G	A	G	-0.123757	0.0149982	0.153754	0.879683	FALSE	FALSE	FALSE	35533345	0.676535	0.0359498	reported	textfile	7	35572955	0.0276225	7.45332e-06	7738	TRUE	reported	textfile	0.00258738	20.0679	20.3343
	rs13087509	T	C	T	C	-0.186384	0.0761312	0.928931	0.075792	FALSE	FALSE	FALSE	22472645	0.094676	0.045554	reported	textfile	3	22514136	0.0410643	5.6564e-06	7738	TRUE	reported	textfile	0.00265525	20.5957	20.3343
	rs1621131	C	A	C	A	0.0912718	0.0226159	0.621384	0.285591	FALSE	FALSE	FALSE	69388928	0.383154	0.0259326	reported	textfile	1	69854611	0.0202906	6.8522e-06	7738	TRUE	reported	textfile	0.00260808	20.2288	20.3343
	rs1675228	A	G	A	G	0.0911738	0.0226053	0.621364	0.285596	FALSE	FALSE	FALSE	69394270	0.383362	0.0259319	reported	textfile	1	69859953	0.0202891	6.99858e-06	7738	TRUE	reported	textfile	0.00260288	20.1884	20.3343
	rs1675230	C	A	C	A	0.0912718	0.0226054	0.621384	0.285596	FALSE	FALSE	FALSE	69392301	0.383361	0.0259319	reported	textfile	1	69857984	0.0202906	6.8522e-06	7738	TRUE	reported	textfile	0.00260808	20.2288	20.3343
	rs1796633	G	T	G	T	0.0912448	0.0226053	0.621389	0.285596	FALSE	FALSE	FALSE	69394350	0.383362	0.0259319	reported	textfile	1	69860033	0.0202907	6.89588e-06	7738	TRUE	reported	textfile	0.00260651	20.2167	20.3343
	rs1926243	A	C	A	C	0.091144	0.0230093	0.621434	0.285763	FALSE	FALSE	FALSE	69404420	0.374887	0.0259302	reported	textfile	1	69870103	0.0202918	7.06724e-06	7738	TRUE	reported	textfile	0.00260049	20.1699	20.3343
	rs1952140	C	T	C	T	0.091144	0.0233655	0.621434	0.285562	FALSE	FALSE	FALSE	69403893	0.367883	0.0259488	reported	textfile	1	69869576	0.0202918	7.06724e-06	7738	TRUE	reported	textfile	0.00260049	20.1699	20.3343
	rs2765866	C	T	C	T	0.0912718	0.0226054	0.621384	0.285596	FALSE	FALSE	FALSE	69392856	0.383361	0.0259319	reported	textfile	1	69858539	0.0202906	6.8522e-06	7738	TRUE	reported	textfile	0.00260808	20.2288	20.3343
	rs4424446	A	C	A	C	0.0910729	0.0220673	0.62141	0.285666	FALSE	FALSE	FALSE	69401807	0.394724	0.0259286	reported	textfile	1	69867490	0.0202902	7.17233e-06	7738	TRUE	reported	textfile	0.00259685	20.1416	20.3343
	rs4509532	T	C	T	C	0.0910665	0.022084	0.62141	0.285656	FALSE	FALSE	FALSE	69402353	0.394381	0.0259293	reported	textfile	1	69868036	0.0202902	7.18307e-06	7738	TRUE	reported	textfile	0.00259649	20.1387	20.3343
	rs4645624	G	A	G	A	0.104313	-0.0213647	0.238138	0.674489	FALSE	FALSE	FALSE	24034182	0.395423	0.0251401	reported	textfile	9	24034180	0.0232806	7.44046e-06	7738	TRUE	reported	textfile	0.00258782	20.0713	20.3343
	rs4649998	G	C	G	C	0.0914835	-0.0224973	0.621474	0.714135	FALSE	TRUE	FALSE	69406002	0.385948	0.0259488	reported	textfile	1	69871685	0.02029	6.51929e-06	7738	TRUE	reported	textfile	0.00262031	20.324	20.3343
	rs4649999	C	T	C	T	0.0914583	0.0224744	0.62148	0.28587	FALSE	FALSE	FALSE	69406102	0.386446	0.0259496	reported	textfile	1	69871785	0.0202898	6.55677e-06	7738	TRUE	reported	textfile	0.00261893	20.3132	20.3343
	rs4650000	C	T	C	T	0.0913147	0.02275	0.62193	0.285966	FALSE	FALSE	FALSE	69406514	0.380693	0.0259519	reported	textfile	1	69872197	0.0203031	6.87353e-06	7738	TRUE	reported	textfile	0.00260732	20.2229	20.3343
	rs4883632	T	C	T	C	-0.0916478	0.0162596	0.51449	0.515747	FALSE	FALSE	FALSE	132621435	0.496711	0.0239227	reported	textfile	12	133198021	0.0206394	8.97842e-06	7738	TRUE	reported	textfile	0.00254165	19.7123	20.3343
	rs498717	T	G	T	G	0.0912718	0.0226054	0.621384	0.285596	FALSE	FALSE	FALSE	69393128	0.383361	0.0259319	reported	textfile	1	69858811	0.0202906	6.8522e-06	7738	TRUE	reported	textfile	0.00260808	20.2288	20.3343
	rs528603	A	T	A	T	0.0915356	-0.0226055	0.621425	0.714404	FALSE	TRUE	FALSE	69390707	0.383358	0.0259319	reported	textfile	1	69856390	0.0202867	6.41874e-06	7738	TRUE	reported	textfile	0.00262414	20.3538	20.3343
	rs559563	C	A	C	A	0.0912008	0.0226056	0.621359	0.285596	FALSE	FALSE	FALSE	69389669	0.383357	0.0259319	reported	textfile	1	69855352	0.020289	6.95425e-06	7738	TRUE	reported	textfile	0.00260444	20.2006	20.3343
	rs560413	C	G	C	G	0.0912718	-0.0226056	0.621384	0.714404	FALSE	TRUE	FALSE	69389603	0.383357	0.0259319	reported	textfile	1	69855286	0.0202906	6.8522e-06	7738	TRUE	reported	textfile	0.00260808	20.2288	20.3343
	rs565076	G	A	G	A	0.0911738	0.0226053	0.621364	0.285596	FALSE	FALSE	FALSE	69397249	0.383362	0.0259319	reported	textfile	1	69862932	0.0202891	6.99858e-06	7738	TRUE	reported	textfile	0.00260288	20.1884	20.3343
	rs565848	T	C	T	C	0.0912008	0.0216852	0.621359	0.285862	FALSE	FALSE	FALSE	69397303	0.402967	0.0259289	reported	textfile	1	69862986	0.020289	6.95425e-06	7738	TRUE	reported	textfile	0.00260444	20.2006	20.3343
	rs58266146	A	G	A	G	-0.110328	0.0176078	0.217718	0.734991	FALSE	FALSE	FALSE	116251587	0.506854	0.026528	reported	textfile	7	115891641	0.0239673	4.1593e-06	7738	TRUE	reported	textfile	0.00273097	21.1846	20.3343
	rs611135	T	A	T	A	0.0903704	-0.0226054	0.619589	0.714404	FALSE	TRUE	FALSE	69393053	0.383361	0.0259319	reported	textfile	1	69858736	0.0202703	8.26228e-06	7738	TRUE	reported	textfile	0.00256206	19.871	20.3343
	rs62305209	G	A	G	A	-0.16418	0.0209066	0.0836224	0.872184	FALSE	FALSE	FALSE	46870111	0.560803	0.0359435	reported	textfile	4	46872128	0.0364364	6.6077e-06	7738	TRUE	reported	textfile	0.00261699	20.2982	20.3343
	rs651799	G	C	G	C	0.0911738	-0.0226025	0.621364	0.714403	FALSE	TRUE	FALSE	69397395	0.383423	0.0259319	reported	textfile	1	69863078	0.0202891	6.99858e-06	7738	TRUE	reported	textfile	0.00260288	20.1884	20.3343
	rs652232	T	C	T	C	0.0912008	0.0227745	0.621359	0.285559	FALSE	FALSE	FALSE	69397315	0.379822	0.0259324	reported	textfile	1	69862998	0.020289	6.95425e-06	7738	TRUE	reported	textfile	0.00260444	20.2006	20.3343
	rs652647	A	T	A	T	0.0912448	-0.0226053	0.621389	0.714404	FALSE	TRUE	FALSE	69397237	0.383362	0.0259319	reported	textfile	1	69862920	0.0202907	6.89588e-06	7738	TRUE	reported	textfile	0.00260651	20.2167	20.3343
	rs6678673	G	T	G	T	0.0910665	0.0220674	0.62141	0.285666	FALSE	FALSE	FALSE	69400588	0.394723	0.0259286	reported	textfile	1	69866271	0.0202902	7.18307e-06	7738	TRUE	reported	textfile	0.00259649	20.1387	20.3343
	rs7034251	A	C	A	C	0.104313	-0.0257121	0.240811	0.674747	FALSE	FALSE	FALSE	24042868	0.306661	0.0251524	reported	textfile	9	24042866	0.0234279	8.48633e-06	7738	TRUE	reported	textfile	0.00255547	19.8197	20.3343
	rs7513164	A	G	A	G	0.0910665	0.0218936	0.62141	0.285618	FALSE	FALSE	FALSE	69399520	0.398535	0.0259329	reported	textfile	1	69865203	0.0202902	7.18307e-06	7738	TRUE	reported	textfile	0.00259649	20.1387	20.3343
	rs7528942	C	T	C	T	0.091217	0.0220726	0.621299	0.285666	FALSE	FALSE	FALSE	69399068	0.394612	0.0259286	reported	textfile	1	69864751	0.0202969	6.98538e-06	7738	TRUE	reported	textfile	0.00260334	20.192	20.3343
	rs7530259	G	A	G	A	0.0944123	0.00128594	0.680928	0.262548	FALSE	FALSE	FALSE	69395092	0.961454	0.0266082	reported	textfile	1	69860775	0.0213721	9.98252e-06	7738	TRUE	reported	textfile	0.00251559	19.5097	20.3343
	rs7530587	G	A	G	A	0.0915797	0.0226053	0.621454	0.285596	FALSE	FALSE	FALSE	69395421	0.383362	0.0259319	reported	textfile	1	69861104	0.0202884	6.36458e-06	7738	TRUE	reported	textfile	0.00262623	20.37	20.3343
	rs77917213	T	C	T	C	0.179322	-0.00445031	0.0890628	0.915111	FALSE	FALSE	FALSE	44168733	0.916334	0.0423627	reported	textfile	2	44395872	0.0357597	5.31337e-07	7738	TRUE	reported	textfile	0.00323923	25.1401	20.3343
	rs7850683	A	G	A	G	0.105932	-0.0225319	0.240353	0.674581	FALSE	FALSE	FALSE	24034819	0.37016	0.0251424	reported	textfile	9	24034817	0.0233388	5.65523e-06	7738	TRUE	reported	textfile	0.0026553	20.5961	20.3343
GCST90027465	rs11253111	C	T	C	T	-0.088334	-0.0221418	0.445402	0.525011	FALSE	FALSE	FALSE	5338701	0.35568	0.0239726	reported	textfile	10	5380664	0.0191906	4.16495e-06	7738	TRUE	reported	textfile	0.00273063	21.182	22.7322
	rs12719960	T	C	T	C	-0.145512	0.00837367	0.105737	0.88413	FALSE	FALSE	FALSE	155359199	0.821387	0.0370908	reported	textfile	7	155151894	0.0309901	2.6603e-06	7738	TRUE	reported	textfile	0.00284111	22.0414	22.7322
	rs13231404	T	C	T	C	0.136056	0.0116606	0.869799	0.164643	FALSE	FALSE	FALSE	155314332	0.716119	0.0320655	reported	textfile	7	155106042	0.0281278	1.3178e-06	7738	TRUE	reported	textfile	0.00301456	23.3912	22.7322
	rs13235115	C	T	C	T	0.155456	-0.0261145	0.877922	0.122585	FALSE	FALSE	FALSE	155339507	0.47328	0.0364141	reported	textfile	7	155131747	0.0290665	8.87789e-08	7738	TRUE	reported	textfile	0.00368297	28.5968	22.7322
	rs13242587	C	T	C	T	0.137341	0.0148289	0.87231	0.162921	FALSE	FALSE	FALSE	155312763	0.645048	0.0321912	reported	textfile	7	155104473	0.028371	1.29271e-06	7738	TRUE	reported	textfile	0.00301932	23.4282	22.7322
	rs139433816	A	G	A	G	-0.134481	-0.000802875	0.130874	0.859155	FALSE	FALSE	FALSE	155325098	0.981231	0.0341285	reported	textfile	7	155116808	0.0280854	1.68225e-06	7738	TRUE	reported	textfile	0.00295425	22.9218	22.7322
	rs139572955	G	C	G	C	0.163737	0.0162782	0.90354	0.887062	FALSE	TRUE	FALSE	155330093	0.666403	0.0377605	reported	textfile	7	155121803	0.0321686	3.58129e-07	7738	TRUE	reported	textfile	0.00333694	25.901	22.7322
	rs140061171	G	T	G	T	0.160899	-0.00740569	0.903292	0.113056	FALSE	FALSE	FALSE	155328212	0.844487	0.0377538	reported	textfile	7	155119922	0.0320952	5.35402e-07	7738	TRUE	reported	textfile	0.00323735	25.1255	22.7322
	rs143144864	A	T	A	T	-0.133566	0.0104155	0.130344	0.1648	FALSE	TRUE	FALSE	155319579	0.745298	0.0320627	reported	textfile	7	155111289	0.0281008	2.00313e-06	7738	TRUE	reported	textfile	0.00291112	22.5861	22.7322
	rs143319686	G	A	G	A	-0.136449	-0.0139873	0.127494	0.836946	FALSE	FALSE	FALSE	155320581	0.663884	0.0321874	reported	textfile	7	155112291	0.0283901	1.53823e-06	7738	TRUE	reported	textfile	0.00297635	23.0938	22.7322
	rs146088149	A	G	A	G	0.163209	-0.0159263	0.903559	0.113404	FALSE	FALSE	FALSE	155327075	0.673339	0.0377784	reported	textfile	7	155118785	0.0321552	3.86109e-07	7738	TRUE	reported	textfile	0.00331828	25.7557	22.7322
	rs146673748	A	G	A	G	-0.133897	-0.0110118	0.130292	0.835256	FALSE	FALSE	FALSE	155319312	0.731269	0.0320633	reported	textfile	7	155111022	0.0280996	1.88773e-06	7738	TRUE	reported	textfile	0.00292577	22.7002	22.7322
	rs150237938	T	C	T	C	-0.116931	-0.00130194	0.17695	0.769346	FALSE	FALSE	FALSE	155319550	0.963147	0.0281775	reported	textfile	7	155111260	0.0250325	2.99482e-06	7738	TRUE	reported	textfile	0.0028119	21.8142	22.7322
	rs150386229	T	C	T	C	0.160939	-0.00670142	0.903259	0.113521	FALSE	FALSE	FALSE	155326242	0.858851	0.0376828	reported	textfile	7	155117952	0.0320817	5.26126e-07	7738	TRUE	reported	textfile	0.00324167	25.1591	22.7322
	rs17175056	G	A	G	A	0.127861	0.0141265	0.122589	0.869374	FALSE	FALSE	FALSE	94127030	0.695	0.0360297	reported	textfile	13	94779284	0.0287119	8.45824e-06	7738	TRUE	reported	textfile	0.0025563	19.8262	22.7322
	rs17720872	A	C	A	C	-0.145712	-0.0371477	0.0940699	0.867903	FALSE	FALSE	FALSE	247200761	0.287337	0.0349139	reported	textfile	1	247364063	0.0328356	9.09515e-06	7738	TRUE	reported	textfile	0.00253845	19.6874	22.7322
	rs2060298	G	C	G	C	0.0872775	0.00194991	0.464683	0.460304	FALSE	TRUE	TRUE	144449396	0.93471	0.0238026	reported	textfile	3	144168238	0.0197138	9.54465e-06	7738	TRUE	reported	textfile	0.0025266	19.5953	22.7322
	rs28635315	C	A	C	A	0.145439	-0.0156278	0.892634	0.115417	FALSE	FALSE	FALSE	155333721	0.676348	0.0374362	reported	textfile	7	155125431	0.0307741	2.28955e-06	7738	TRUE	reported	textfile	0.00287813	22.3295	22.7322
	rs34327601	C	T	C	T	-0.141108	-0.0192278	0.123925	0.834802	FALSE	FALSE	FALSE	155294551	0.549347	0.0321139	reported	textfile	7	155086261	0.0297281	2.06852e-06	7738	TRUE	reported	textfile	0.0029032	22.5246	22.7322
	rs35353544	C	T	C	T	0.138435	0.0148554	0.872503	0.162924	FALSE	FALSE	FALSE	155313564	0.644469	0.0321923	reported	textfile	7	155105274	0.0283943	1.0856e-06	7738	TRUE	reported	textfile	0.00306245	23.7639	22.7322
	rs35421208	T	C	T	C	0.137929	0.0148735	0.872399	0.16291	FALSE	FALSE	FALSE	155312160	0.644039	0.0321897	reported	textfile	7	155103870	0.0283723	1.16552e-06	7738	TRUE	reported	textfile	0.00304487	23.6271	22.7322
	rs36130067	G	C	G	C	-0.136699	0.00400928	0.12866	0.139156	FALSE	TRUE	FALSE	155325479	0.906923	0.0342904	reported	textfile	7	155117189	0.0283347	1.40388e-06	7738	TRUE	reported	textfile	0.00299889	23.2692	22.7322
	rs36132708	T	C	T	C	0.136651	0.0115326	0.869719	0.164664	FALSE	FALSE	FALSE	155315290	0.719114	0.0320668	reported	textfile	7	155107000	0.0281279	1.18462e-06	7738	TRUE	reported	textfile	0.00304088	23.596	22.7322
	rs36174503	T	G	T	G	-0.133832	-0.0108069	0.130307	0.835221	FALSE	FALSE	FALSE	155321738	0.736029	0.0320569	reported	textfile	7	155113448	0.0281011	1.91188e-06	7738	TRUE	reported	textfile	0.00292263	22.6757	22.7322
	rs36175564	T	A	T	A	0.136662	-0.0144191	0.872474	0.837009	FALSE	TRUE	FALSE	155317281	0.654244	0.0321947	reported	textfile	7	155108991	0.0283816	1.47089e-06	7738	TRUE	reported	textfile	0.0029874	23.1798	22.7322
	rs36177465	C	T	C	T	-0.133832	-0.0105948	0.130293	0.835183	FALSE	FALSE	FALSE	155323203	0.740947	0.0320473	reported	textfile	7	155114913	0.0281034	1.91545e-06	7738	TRUE	reported	textfile	0.00292215	22.672	22.7322
	rs36179556	C	A	C	A	0.136617	0.0143712	0.872474	0.163	FALSE	FALSE	FALSE	155317662	0.655313	0.032194	reported	textfile	7	155109372	0.0283816	1.48259e-06	7738	TRUE	reported	textfile	0.00298544	23.1645	22.7322
	rs36182086	C	T	C	T	0.136004	0.0114603	0.869766	0.164676	FALSE	FALSE	FALSE	155315842	0.720804	0.0320673	reported	textfile	7	155107552	0.0281278	1.32993e-06	7738	TRUE	reported	textfile	0.00301226	23.3733	22.7322
	rs36182340	T	G	T	G	0.163245	-0.0149128	0.903563	0.112865	FALSE	FALSE	FALSE	155326760	0.69292	0.0377638	reported	textfile	7	155118470	0.0321549	3.83743e-07	7738	TRUE	reported	textfile	0.0033198	25.7676	22.7322
	rs6085392	A	G	A	G	0.0978381	0.0018499	0.260986	0.808472	FALSE	FALSE	FALSE	6086077	0.951093	0.0301607	reported	textfile	20	6066724	0.021937	8.19728e-06	7738	TRUE	reported	textfile	0.002564	19.8861	22.7322
	rs6123777	A	G	A	G	0.153475	0.0207614	0.101285	0.891391	FALSE	FALSE	FALSE	58210333	0.589286	0.0384563	reported	textfile	20	56785389	0.0343227	7.76623e-06	7738	TRUE	reported	textfile	0.00257729	19.9894	22.7322
	rs61291494	C	T	C	T	0.137341	0.0148289	0.87231	0.162921	FALSE	FALSE	FALSE	155312764	0.645049	0.0321912	reported	textfile	7	155104474	0.028371	1.29271e-06	7738	TRUE	reported	textfile	0.00301932	23.4282	22.7322
	rs61309529	T	C	T	C	-0.197779	-0.00269484	0.0649336	0.877829	FALSE	FALSE	FALSE	155293372	0.941796	0.036909	reported	textfile	7	155085082	0.039039	4.05882e-07	7738	TRUE	reported	textfile	0.00330595	25.6596	22.7322
	rs61861701	G	A	G	A	0.116389	-0.00628907	0.245597	0.814491	FALSE	FALSE	FALSE	110605246	0.837826	0.030727	reported	textfile	10	112365004	0.0229379	3.89377e-07	7738	TRUE	reported	textfile	0.00331623	25.7397	22.7322
	rs71534185	T	G	T	G	0.139012	0.0157299	0.872902	0.162901	FALSE	FALSE	FALSE	155310280	0.625027	0.0321847	reported	textfile	7	155101990	0.0285013	1.0751e-06	7738	TRUE	reported	textfile	0.00306488	23.7828	22.7322
	rs72770366	T	C	T	C	-0.146628	-0.0374207	0.0942106	0.867893	FALSE	FALSE	FALSE	247199759	0.283813	0.0349141	reported	textfile	1	247363061	0.0328266	7.94182e-06	7738	TRUE	reported	textfile	0.00257179	19.9466	22.7322
	rs72770371	G	C	G	C	-0.147139	0.0370309	0.0938459	0.131693	FALSE	TRUE	FALSE	247204834	0.289254	0.0349428	reported	textfile	1	247368136	0.0326224	6.47158e-06	7738	TRUE	reported	textfile	0.00262213	20.3382	22.7322
	rs72770374	A	G	A	G	-0.146261	-0.0371175	0.0941077	0.868388	FALSE	FALSE	FALSE	247209573	0.28802	0.0349349	reported	textfile	1	247372875	0.0325955	7.21789e-06	7738	TRUE	reported	textfile	0.00259528	20.1293	22.7322
	rs743920	G	C	G	C	-0.151934	0.0609391	0.128486	0.113689	FALSE	TRUE	FALSE	29225139	0.100955	0.0371525	reported	textfile	22	29621128	0.0322058	2.3866e-06	7738	TRUE	reported	textfile	0.00286791	22.25	22.7322
	rs7659451	G	A	G	A	0.113654	0.0309825	0.824174	0.112428	FALSE	FALSE	FALSE	10728889	0.405542	0.0372492	reported	textfile	4	10730513	0.0255139	8.40582e-06	7738	TRUE	reported	textfile	0.00255785	19.8383	22.7322
	rs77030896	T	C	T	C	-0.196481	-0.00795773	0.063473	0.877405	FALSE	FALSE	FALSE	155287294	0.830006	0.0370654	reported	textfile	7	155079004	0.0401547	9.92545e-07	7738	TRUE	reported	textfile	0.00308459	23.9362	22.7322
	rs776910	G	A	G	A	0.112024	0.0844426	0.825487	0.196407	FALSE	FALSE	FALSE	10786483	0.00359021	0.0289972	reported	textfile	1	10846540	0.0251821	8.6453e-06	7738	TRUE	reported	textfile	0.00255094	19.7845	22.7322
	rs78667250	C	G	C	G	-0.178249	-0.0257664	0.0622541	0.0770199	FALSE	TRUE	FALSE	155310279	0.565284	0.0448102	reported	textfile	7	155101989	0.039824	7.60782e-06	7738	TRUE	reported	textfile	0.00258234	20.0287	22.7322
GCST90027466	rs116470157	T	C	T	C	-0.157257	0.00633397	0.0655714	0.902411	FALSE	FALSE	FALSE	64868952	0.874813	0.0402035	reported	textfile	2	65096086	0.0345673	5.38257e-06	7738	TRUE	reported	textfile	0.00266747	20.6908	20.3902
	rs11731492	T	C	T	C	0.157379	-0.0222584	0.0717673	0.937476	FALSE	FALSE	FALSE	15151729	0.65216	0.0493794	reported	textfile	4	15153353	0.0350092	6.94576e-06	7738	TRUE	reported	textfile	0.00260476	20.203	20.3902
	rs12621639	A	C	A	C	0.0768744	0.00959637	0.505619	0.413756	FALSE	FALSE	FALSE	229311098	0.689733	0.024038	reported	textfile	2	230175814	0.0171812	7.66479e-06	7738	TRUE	reported	textfile	0.00258051	20.0145	20.3902
	rs13336538	G	A	G	A	0.0912246	0.0278895	0.244732	0.681554	FALSE	FALSE	FALSE	25899444	0.275471	0.0255738	reported	textfile	16	25910765	0.0200654	5.45783e-06	7738	TRUE	reported	textfile	0.00266404	20.6641	20.3902
	rs1480889	T	C	T	C	0.0758833	0.0117481	0.458528	0.529811	FALSE	FALSE	FALSE	92342810	0.618867	0.0236162	reported	textfile	8	93355038	0.016962	7.6867e-06	7738	TRUE	reported	textfile	0.00257981	20.009	20.3902
	rs17503513	T	G	T	G	0.104512	0.00106123	0.207469	0.769542	FALSE	FALSE	FALSE	17435803	0.969855	0.0280821	reported	textfile	8	17293312	0.0212123	8.35103e-07	7738	TRUE	reported	textfile	0.00312729	24.2686	20.3902
	rs1940965	C	A	C	A	-0.138755	0.0211866	0.084563	0.899899	FALSE	FALSE	FALSE	105895135	0.588322	0.0391423	reported	textfile	11	105765861	0.0310613	7.92793e-06	7738	TRUE	reported	textfile	0.00257224	19.9501	20.3902
	rs342221	T	G	T	G	-0.076973	-0.0440382	0.440168	0.552406	FALSE	FALSE	FALSE	106687688	0.0627784	0.0236668	reported	textfile	7	106328134	0.0172478	8.09077e-06	7738	TRUE	reported	textfile	0.00256723	19.9112	20.3902
	rs342239	C	T	C	T	-0.0760891	-0.0447881	0.440574	0.552307	FALSE	FALSE	FALSE	106696456	0.0584507	0.0236686	reported	textfile	7	106336902	0.0172025	9.72747e-06	7738	TRUE	reported	textfile	0.00252195	19.5591	20.3902
	rs342240	A	G	A	G	-0.0760394	-0.0449059	0.440541	0.552244	FALSE	FALSE	FALSE	106696804	0.057799	0.0236693	reported	textfile	7	106337250	0.0172029	9.86279e-06	7738	TRUE	reported	textfile	0.00251855	19.5327	20.3902
	rs342241	T	C	T	C	-0.0759984	-0.0447268	0.440516	0.552298	FALSE	FALSE	FALSE	106696905	0.0588031	0.0236692	reported	textfile	7	106337351	0.0172036	9.98068e-06	7738	TRUE	reported	textfile	0.00251563	19.51	20.3902
	rs395474	A	G	A	G	0.1524	-0.00345265	0.921998	0.03939	FALSE	FALSE	FALSE	107094100	0.953914	0.0597428	reported	textfile	4	108015257	0.0325768	2.89448e-06	7738	TRUE	reported	textfile	0.00282032	21.8797	20.3902
	rs6993812	T	C	T	C	0.0752779	0.0130933	0.46037	0.529255	FALSE	FALSE	FALSE	92347915	0.579525	0.0236308	reported	textfile	8	93360143	0.0169724	9.19454e-06	7738	TRUE	reported	textfile	0.00253581	19.6669	20.3902
	rs76523770	T	G	T	G	0.152249	-0.0846323	0.0689696	0.935039	FALSE	FALSE	FALSE	36059962	0.075504	0.0476159	reported	textfile	4	36061584	0.0343819	9.50298e-06	7738	TRUE	reported	textfile	0.00252768	19.6036	20.3902
GCST90027467	rs10437750	A	G	A	G	-0.117043	0.0260584	0.459928	0.412433	FALSE	FALSE	FALSE	73043000	0.278183	0.02403	reported	textfile	11	72754045	0.0244428	1.68089e-06	7738	TRUE	reported	textfile	0.00295444	22.9233	22.3628
	rs10793054	A	C	A	C	-0.123074	0.00783366	0.350503	0.575307	FALSE	FALSE	FALSE	72951767	0.743949	0.0239834	reported	textfile	11	72662812	0.0252026	1.04273e-06	7738	TRUE	reported	textfile	0.00307239	23.8413	22.3628
	rs10793055	C	T	C	T	-0.116985	0.01677	0.409441	0.517604	FALSE	FALSE	FALSE	72999716	0.479676	0.0237259	reported	textfile	11	72710761	0.0245235	1.83942e-06	7738	TRUE	reported	textfile	0.00293219	22.7501	22.3628
	rs10793056	C	T	C	T	-0.118553	0.0366946	0.499322	0.390697	FALSE	FALSE	FALSE	73049120	0.129688	0.0242155	reported	textfile	11	72760165	0.0242569	1.02183e-06	7738	TRUE	reported	textfile	0.00307742	23.8804	22.3628
	rs10898894	T	C	T	C	-0.11812	0.0249996	0.440851	0.44274	FALSE	FALSE	FALSE	72989734	0.293771	0.0238117	reported	textfile	11	72700779	0.0242949	1.1626e-06	7738	TRUE	reported	textfile	0.00304553	23.6322	22.3628
	rs10898895	A	T	A	T	-0.117716	-0.0145108	0.408493	0.475296	FALSE	TRUE	TRUE	73030353	0.540783	0.0237247	reported	textfile	11	72741398	0.0246231	1.74675e-06	7738	TRUE	reported	textfile	0.00294494	22.8493	22.3628
	rs10898896	C	T	C	T	-0.11976	0.0363016	0.498345	0.391022	FALSE	FALSE	FALSE	73080844	0.133707	0.0242068	reported	textfile	11	72791889	0.0242579	7.93506e-07	7738	TRUE	reported	textfile	0.00313995	24.3672	22.3628
	rs10898900	T	A	T	A	-0.118792	0.0251818	0.462195	0.412561	FALSE	TRUE	TRUE	73133347	0.294605	0.0240268	reported	textfile	11	72844392	0.024709	1.52728e-06	7738	TRUE	reported	textfile	0.00297811	23.1074	22.3628
	rs11235612	G	A	G	A	-0.116707	0.00849229	0.370599	0.538942	FALSE	FALSE	FALSE	72902228	0.721288	0.0238054	reported	textfile	11	72613273	0.0250144	3.07688e-06	7738	TRUE	reported	textfile	0.00280521	21.7621	22.3628
	rs12288580	A	G	A	G	-0.116927	0.035082	0.498737	0.391278	FALSE	FALSE	FALSE	72997843	0.147194	0.0242026	reported	textfile	11	72708888	0.0240964	1.21919e-06	7738	TRUE	reported	textfile	0.00303373	23.5404	22.3628
	rs12294533	C	T	C	T	-0.115855	0.0252138	0.462158	0.412708	FALSE	FALSE	FALSE	72973853	0.293855	0.02402	reported	textfile	11	72684898	0.0243379	1.93317e-06	7738	TRUE	reported	textfile	0.00291988	22.6543	22.3628
	rs17729512	G	A	G	A	0.204838	-0.017087	0.0721954	0.938561	FALSE	FALSE	FALSE	88293773	0.727991	0.0491289	reported	textfile	8	89306002	0.0461462	9.04232e-06	7738	TRUE	reported	textfile	0.0025399	19.6987	22.3628
	rs17766100	A	G	A	G	-0.20134	-0.0153312	0.0916358	0.932913	FALSE	FALSE	FALSE	71315986	0.740014	0.0462011	reported	textfile	17	69312127	0.0434601	3.60828e-06	7738	TRUE	reported	textfile	0.00276597	21.4569	22.3628
	rs1982585	T	C	T	C	-0.118699	0.0258347	0.459862	0.412354	FALSE	FALSE	FALSE	73071429	0.282312	0.0240291	reported	textfile	11	72782474	0.0244752	1.23623e-06	7738	TRUE	reported	textfile	0.00303036	23.5142	22.3628
	rs2276379	T	C	T	C	-0.116958	0.0260349	0.460081	0.412447	FALSE	FALSE	FALSE	73047308	0.278679	0.0240332	reported	textfile	11	72758353	0.0244475	1.71779e-06	7738	TRUE	reported	textfile	0.00294903	22.8812	22.3628
	rs2303969	A	G	A	G	-0.121695	0.00360732	0.348213	0.575904	FALSE	FALSE	FALSE	72825227	0.880464	0.0239878	reported	textfile	11	72536272	0.0254124	1.67803e-06	7738	TRUE	reported	textfile	0.00295488	22.9267	22.3628
	rs2420129	A	C	A	C	-0.193205	-0.00184557	0.919003	0.125685	FALSE	FALSE	FALSE	26331749	0.958457	0.0354305	reported	textfile	13	26905886	0.043613	9.42367e-06	7738	TRUE	reported	textfile	0.00252974	19.6197	22.3628
	rs2514587	A	G	A	G	0.114772	-0.0109747	0.626008	0.277995	FALSE	FALSE	FALSE	118587453	0.676226	0.0262794	reported	textfile	8	119599692	0.02552	6.88034e-06	7738	TRUE	reported	textfile	0.00260704	20.2208	22.3628
	rs28986476	T	C	T	C	0.203966	-0.0165259	0.0722165	0.938518	FALSE	FALSE	FALSE	88301558	0.736658	0.0491429	reported	textfile	8	89313787	0.046104	9.68746e-06	7738	TRUE	reported	textfile	0.00252297	19.5671	22.3628
	rs4711791	A	G	A	G	-0.131441	-0.0453345	0.311064	0.689714	FALSE	FALSE	FALSE	44630818	0.0765121	0.025594	reported	textfile	6	44598555	0.0266352	8.02047e-07	7738	TRUE	reported	textfile	0.0031373	24.3466	22.3628
	rs55671951	G	C	G	C	-0.113999	0.0268031	0.461453	0.412036	FALSE	TRUE	TRUE	72924063	0.264695	0.0240308	reported	textfile	11	72635108	0.0244195	3.03592e-06	7738	TRUE	reported	textfile	0.00280853	21.7879	22.3628
	rs58755914	T	C	T	C	0.203966	-0.0166555	0.0722165	0.938555	FALSE	FALSE	FALSE	88303956	0.734712	0.0491508	reported	textfile	8	89316185	0.046104	9.68746e-06	7738	TRUE	reported	textfile	0.00252297	19.5671	22.3628
	rs60355221	A	G	A	G	-0.114514	0.0236867	0.440949	0.442225	FALSE	FALSE	FALSE	72854880	0.320014	0.0238194	reported	textfile	11	72565925	0.0245395	3.06337e-06	7738	TRUE	reported	textfile	0.00280632	21.7708	22.3628
	rs6592508	G	A	G	A	-0.118448	0.0364488	0.49804	0.390796	FALSE	FALSE	FALSE	73073628	0.132165	0.0242085	reported	textfile	11	72784673	0.0242454	1.03238e-06	7738	TRUE	reported	textfile	0.0030749	23.8608	22.3628
	rs7104158	G	A	G	A	-0.116327	0.0381694	0.503595	0.388954	FALSE	FALSE	FALSE	73055152	0.115609	0.024258	reported	textfile	11	72766197	0.0242604	1.62738e-06	7738	TRUE	reported	textfile	0.00296243	22.9854	22.3628
	rs7129921	G	T	G	T	-0.116593	0.0171143	0.409277	0.517638	FALSE	FALSE	FALSE	72965829	0.470708	0.0237261	reported	textfile	11	72676874	0.0245191	1.98249e-06	7738	TRUE	reported	textfile	0.00291367	22.606	22.3628
	rs7222065	T	C	T	C	-0.208307	-0.0148968	0.0927288	0.932857	FALSE	FALSE	FALSE	71320370	0.746813	0.0461423	reported	textfile	17	69316511	0.0432142	1.43308e-06	7738	TRUE	reported	textfile	0.00299381	23.2296	22.3628
	rs72878051	C	T	C	T	-0.192493	-0.010551	0.0935823	0.931941	FALSE	FALSE	FALSE	71318990	0.81844	0.0459634	reported	textfile	17	69315131	0.0431343	8.09525e-06	7738	TRUE	reported	textfile	0.00256708	19.91	22.3628
	rs73692215	A	G	A	G	0.204579	-0.0170997	0.0721805	0.938561	FALSE	FALSE	FALSE	88288012	0.7278	0.0491295	reported	textfile	8	89300241	0.0461668	9.36699e-06	7738	TRUE	reported	textfile	0.00253124	19.6314	22.3628
	rs75419689	G	A	G	A	-0.18665	-0.0317716	0.099295	0.921423	FALSE	FALSE	FALSE	17961005	0.467624	0.0437415	reported	textfile	6	17961236	0.0411153	5.63404e-06	7738	TRUE	reported	textfile	0.00265623	20.6033	22.3628
	rs77474207	G	A	G	A	-0.198637	-0.0541714	0.0998954	0.914488	FALSE	FALSE	FALSE	18010342	0.199843	0.0422554	reported	textfile	6	18010573	0.0410775	1.327e-06	7738	TRUE	reported	textfile	0.00301282	23.3776	22.3628
	rs7925466	C	A	C	A	-0.118188	0.018192	0.4079	0.517176	FALSE	FALSE	FALSE	73067068	0.443209	0.023725	reported	textfile	11	72778113	0.0246568	1.64044e-06	7738	TRUE	reported	textfile	0.00296045	22.97	22.3628
	rs7925928	G	A	G	A	-0.11798	0.0173416	0.409127	0.517237	FALSE	FALSE	FALSE	73037339	0.464867	0.0237278	reported	textfile	11	72748384	0.0246291	1.66567e-06	7738	TRUE	reported	textfile	0.00295668	22.9407	22.3628
	rs7936751	G	T	G	T	-0.114771	0.0135595	0.420857	0.512842	FALSE	FALSE	FALSE	73009154	0.567406	0.0237106	reported	textfile	11	72720199	0.0246065	3.09742e-06	7738	TRUE	reported	textfile	0.0028036	21.7497	22.3628
	rs7937701	G	A	G	A	-0.120752	0.0362783	0.499312	0.390666	FALSE	FALSE	FALSE	73121632	0.13397	0.0242077	reported	textfile	11	72832677	0.024402	7.48049e-07	7738	TRUE	reported	textfile	0.00315455	24.4808	22.3628
	rs9542995	A	G	A	G	-0.171703	0.0160818	0.286838	0.611039	FALSE	FALSE	FALSE	72536186	0.531689	0.0257132	reported	textfile	13	73110324	0.0355509	1.36672e-06	7738	TRUE	reported	textfile	0.00300551	23.3207	22.3628
	rs9645708	C	T	C	T	-0.121194	0.00860286	0.371151	0.538806	FALSE	FALSE	FALSE	73108273	0.717746	0.0237995	reported	textfile	11	72819318	0.0252173	1.53989e-06	7738	TRUE	reported	textfile	0.00297606	23.0915	22.3628
GCST90027468	rs117047298	A	T	A	T	0.196059	0.0627787	0.159337	0.159939	FALSE	TRUE	FALSE	58355515	0.0510529	0.0321772	reported	textfile	11	58122988	0.0400752	9.9669e-07	7738	TRUE	reported	textfile	0.00308356	23.9282	22.0922
	rs11784069	G	T	G	T	-0.132133	-0.00516635	0.374684	0.621476	FALSE	FALSE	FALSE	2171663	0.832582	0.0244398	reported	textfile	8	2119582	0.0289932	5.17941e-06	7738	TRUE	reported	textfile	0.00267693	20.7643	22.0922
	rs13271597	C	T	C	T	-0.128453	-0.0118277	0.41138	0.593443	FALSE	FALSE	FALSE	2159792	0.624024	0.0241305	reported	textfile	8	2107717	0.0288973	8.78375e-06	7738	TRUE	reported	textfile	0.00254705	19.7543	22.0922
	rs1366424	A	G	A	G	0.185118	0.00427421	0.134736	0.826031	FALSE	FALSE	FALSE	40183162	0.891199	0.031247	reported	textfile	2	40410302	0.0419062	9.98734e-06	7738	TRUE	reported	textfile	0.00251546	19.5087	22.0922
	rs146624623	G	A	G	A	-0.223714	0.015896	0.10064	0.943872	FALSE	FALSE	FALSE	152787777	0.756075	0.0511721	reported	textfile	7	152484862	0.0504934	9.39918e-06	7738	TRUE	reported	textfile	0.00253039	19.6248	22.0922
	rs1866720	C	G	C	G	0.153926	-0.0349003	0.342302	0.33836	FALSE	TRUE	FALSE	2161517	0.161821	0.024947	reported	textfile	8	2109442	0.0301213	3.21825e-07	7738	TRUE	reported	textfile	0.00336345	26.1074	22.0922
	rs1866721	A	T	A	T	0.152867	-0.0349817	0.34263	0.338385	FALSE	TRUE	FALSE	2161727	0.160811	0.0249451	reported	textfile	8	2109652	0.0301088	3.83125e-07	7738	TRUE	reported	textfile	0.00332022	25.7708	22.0922
	rs2581573	C	G	C	G	-0.129593	0.000702859	0.373837	0.366337	FALSE	TRUE	FALSE	2172586	0.977151	0.0245401	reported	textfile	8	2120521	0.0290864	8.37163e-06	7738	TRUE	reported	textfile	0.00255883	19.8459	22.0922
	rs2581574	A	G	A	G	-0.129473	-0.000682126	0.37369	0.63365	FALSE	FALSE	FALSE	2172661	0.977825	0.0245401	reported	textfile	8	2120596	0.0291013	8.62542e-06	7738	TRUE	reported	textfile	0.0025515	19.7889	22.0922
	rs2618816	T	G	T	G	-0.129524	-8.08221e-06	0.373334	0.63356	FALSE	FALSE	FALSE	2171783	0.999737	0.0245467	reported	textfile	8	2119702	0.0291075	8.5937e-06	7738	TRUE	reported	textfile	0.00255242	19.796	22.0922
	rs6916769	G	T	G	T	-0.142408	-0.0448232	0.298281	0.711585	FALSE	FALSE	FALSE	75992801	0.0838089	0.0259244	reported	textfile	6	76702518	0.0314154	5.81407e-06	7738	TRUE	reported	textfile	0.00264852	20.5434	22.0922
	rs7461966	G	C	G	C	0.196781	-0.0612237	0.117127	0.103735	FALSE	TRUE	FALSE	87728836	0.108482	0.0381444	reported	textfile	8	88741064	0.0439708	7.63203e-06	7738	TRUE	reported	textfile	0.00258158	20.0228	22.0922
	rs7754370	T	G	T	G	-0.141843	-0.0448548	0.298724	0.711587	FALSE	FALSE	FALSE	75996159	0.0836334	0.0259278	reported	textfile	6	76705876	0.0314018	6.27105e-06	7738	TRUE	reported	textfile	0.00262987	20.3983	22.0922
	rs7843972	T	C	T	C	0.153233	0.0351462	0.342095	0.661627	FALSE	FALSE	FALSE	2159625	0.158817	0.024943	reported	textfile	8	2107550	0.0301935	3.87436e-07	7738	TRUE	reported	textfile	0.00331746	25.7493	22.0922
	rs9288803	C	T	C	T	-0.138405	-0.0226979	0.404818	0.6091	FALSE	FALSE	FALSE	105413164	0.348348	0.0242034	reported	textfile	3	105132008	0.0294732	2.65369e-06	7738	TRUE	reported	textfile	0.00284174	22.0464	22.0922
	rs9314455	G	A	G	A	0.153242	0.0319658	0.346459	0.659932	FALSE	FALSE	FALSE	2161134	0.199394	0.0249094	reported	textfile	8	2109059	0.0300783	3.49148e-07	7738	TRUE	reported	textfile	0.00334323	25.95	22.0922
	rs9314456	A	G	A	G	0.153494	0.035219	0.342408	0.661564	FALSE	FALSE	FALSE	2161407	0.157948	0.0249425	reported	textfile	8	2109332	0.030117	3.45852e-07	7738	TRUE	reported	textfile	0.00334561	25.9685	22.0922
GCST90027469	rs10162212	C	A	C	A	0.0804145	0.0314609	0.322017	0.665562	FALSE	FALSE	FALSE	71349723	0.208047	0.0249897	reported	textfile	13	71923855	0.0174519	4.06996e-06	7738	TRUE	reported	textfile	0.00273631	21.2261	20.544
	rs11247298	T	C	T	C	-0.0830239	0.0186983	0.731294	0.385909	FALSE	FALSE	FALSE	98361030	0.443805	0.0244171	reported	textfile	15	98904259	0.0183657	6.1668e-06	7738	TRUE	reported	textfile	0.00263401	20.4305	20.544
	rs12385877	C	T	C	T	0.0789914	0.0314107	0.320454	0.666095	FALSE	FALSE	FALSE	71361070	0.209001	0.0250022	reported	textfile	13	71935202	0.0175375	6.66392e-06	7738	TRUE	reported	textfile	0.00261492	20.2821	20.544
	rs12594526	C	T	C	T	-0.0837087	0.018568	0.731372	0.38592	FALSE	FALSE	FALSE	98360315	0.446953	0.0244154	reported	textfile	15	98903544	0.0183232	4.91326e-06	7738	TRUE	reported	textfile	0.00268992	20.8654	20.544
	rs1273560	G	A	G	A	0.0928482	0.022869	0.233308	0.754105	FALSE	FALSE	FALSE	197824169	0.411999	0.027876	reported	textfile	3	197551040	0.0207781	7.87463e-06	7738	TRUE	reported	textfile	0.00257387	19.9629	20.544
	rs12859492	C	T	C	T	0.0832796	0.0310195	0.30745	0.672175	FALSE	FALSE	FALSE	71331420	0.218321	0.0251985	reported	textfile	13	71905552	0.0178178	2.95461e-06	7738	TRUE	reported	textfile	0.00281524	21.8402	20.544
	rs12860213	G	A	G	A	0.0793949	0.0290758	0.321697	0.668871	FALSE	FALSE	FALSE	71340814	0.245703	0.025047	reported	textfile	13	71914946	0.0174686	5.49326e-06	7738	TRUE	reported	textfile	0.00266246	20.6517	20.544
	rs12874825	C	G	C	G	0.0794081	-0.0294912	0.321707	0.330945	FALSE	TRUE	FALSE	71339035	0.239139	0.0250532	reported	textfile	13	71913167	0.0174678	5.46814e-06	7738	TRUE	reported	textfile	0.00266358	20.6605	20.544
	rs139391170	T	C	T	C	-0.135024	-0.00579829	0.0790709	0.968179	FALSE	FALSE	FALSE	95651701	0.931199	0.0671591	reported	textfile	6	96099577	0.0302166	7.87535e-06	7738	TRUE	reported	textfile	0.00257385	19.9627	20.544
	rs1444942	C	G	C	G	0.105486	-0.0565129	0.139608	0.165987	FALSE	TRUE	FALSE	58393614	0.0732706	0.0315514	reported	textfile	15	58685813	0.0235972	7.8125e-06	7738	TRUE	reported	textfile	0.00257585	19.9782	20.544
	rs1537534	T	C	T	C	0.0794081	0.0286447	0.321707	0.668805	FALSE	FALSE	FALSE	71338880	0.252825	0.0250497	reported	textfile	13	71913012	0.0174678	5.46814e-06	7738	TRUE	reported	textfile	0.00266358	20.6605	20.544
	rs1537536	A	C	A	C	0.0796129	0.02988	0.321668	0.668984	FALSE	FALSE	FALSE	71338761	0.232928	0.0250492	reported	textfile	13	71912893	0.0174667	5.16488e-06	7738	TRUE	reported	textfile	0.00267764	20.7698	20.544
	rs166359	T	G	T	G	-0.107353	-0.0510865	0.863969	0.168755	FALSE	FALSE	FALSE	58395410	0.103387	0.0313674	reported	textfile	15	58687609	0.0238372	6.6819e-06	7738	TRUE	reported	textfile	0.00261428	20.2771	20.544
	rs16940174	A	G	A	G	0.107451	0.05601	0.137982	0.834265	FALSE	FALSE	FALSE	58394139	0.0760992	0.0315766	reported	textfile	15	58686338	0.0237757	6.20212e-06	7738	TRUE	reported	textfile	0.00263258	20.4194	20.544
	rs16940181	C	A	C	A	0.109066	0.0550672	0.134852	0.834079	FALSE	FALSE	FALSE	58395325	0.0811727	0.0315767	reported	textfile	15	58687524	0.0239318	5.18024e-06	7738	TRUE	reported	textfile	0.00267692	20.7642	20.544
	rs172720	G	A	G	A	0.0712719	0.0124162	0.506095	0.543137	FALSE	FALSE	FALSE	18197888	0.599311	0.0236323	reported	textfile	5	18197997	0.0161325	9.96575e-06	7738	TRUE	reported	textfile	0.002516	19.5129	20.544
	rs17601584	C	T	C	T	0.0883662	-0.0457557	0.2542	0.761172	FALSE	FALSE	FALSE	61475321	0.0975304	0.0276145	reported	textfile	17	59552682	0.0185187	1.82646e-06	7738	TRUE	reported	textfile	0.00293391	22.7635	20.544
	rs17601633	G	A	G	A	0.0784141	-0.0581103	0.360364	0.665927	FALSE	FALSE	FALSE	61477016	0.0201233	0.025004	reported	textfile	17	59554377	0.0167723	2.93657e-06	7738	TRUE	reported	textfile	0.00281676	21.852	20.544
	rs1827616	C	T	C	T	0.0717428	0.00826065	0.507147	0.545503	FALSE	FALSE	FALSE	18235067	0.726976	0.0236593	reported	textfile	5	18235176	0.0161428	8.81983e-06	7738	TRUE	reported	textfile	0.00254603	19.7463	20.544
	rs1931438	A	G	A	G	0.0791601	0.0302098	0.321694	0.66891	FALSE	FALSE	FALSE	71343104	0.227835	0.0250505	reported	textfile	13	71917236	0.0174684	5.85315e-06	7738	TRUE	reported	textfile	0.00264683	20.5302	20.544
	rs1931439	G	C	G	C	0.0791735	-0.0288081	0.3217	0.331196	FALSE	TRUE	FALSE	71343015	0.25001	0.0250434	reported	textfile	13	71917147	0.0174677	5.8268e-06	7738	TRUE	reported	textfile	0.00264794	20.5388	20.544
	rs1931440	A	T	A	T	0.0791077	-0.0287974	0.32171	0.331198	FALSE	TRUE	FALSE	71341925	0.250196	0.025044	reported	textfile	13	71916057	0.0174677	5.93198e-06	7738	TRUE	reported	textfile	0.00264355	20.5047	20.544
	rs1931443	G	C	G	C	0.0787543	-0.0289544	0.32076	0.330585	FALSE	TRUE	FALSE	71336784	0.247903	0.0250588	reported	textfile	13	71910916	0.0174678	6.5271e-06	7738	TRUE	reported	textfile	0.00262002	20.3217	20.544
	rs1931444	T	A	T	A	0.078804	-0.029795	0.32077	0.330612	FALSE	TRUE	FALSE	71336722	0.23439	0.0250563	reported	textfile	13	71910854	0.0174675	6.43843e-06	7738	TRUE	reported	textfile	0.00262341	20.348	20.544
	rs1931445	C	T	C	T	0.0843042	0.028972	0.271158	0.712437	FALSE	FALSE	FALSE	71336664	0.267287	0.0261166	reported	textfile	13	71910796	0.0186232	5.98756e-06	7738	TRUE	reported	textfile	0.00264127	20.487	20.544
	rs1931447	G	A	G	A	0.0786972	0.0311269	0.320887	0.665707	FALSE	FALSE	FALSE	71336392	0.213316	0.0250116	reported	textfile	13	71910524	0.0174661	6.61485e-06	7738	TRUE	reported	textfile	0.00261674	20.2962	20.544
	rs221841	C	T	C	T	0.0719745	0.0121165	0.506316	0.543363	FALSE	FALSE	FALSE	18186845	0.608296	0.0236416	reported	textfile	5	18186954	0.0161499	8.32473e-06	7738	TRUE	reported	textfile	0.00256021	19.8566	20.544
	rs261301	C	T	C	T	-0.106719	-0.0510747	0.864177	0.168661	FALSE	FALSE	FALSE	58394740	0.103425	0.0313636	reported	textfile	15	58686939	0.0238061	7.36563e-06	7738	TRUE	reported	textfile	0.00259031	20.0907	20.544
	rs2938450	G	A	G	A	0.0723017	0.00888262	0.516406	0.538946	FALSE	FALSE	FALSE	18236397	0.706726	0.0236079	reported	textfile	5	18236506	0.0161629	7.70141e-06	7738	TRUE	reported	textfile	0.00257934	20.0054	20.544
	rs2938451	T	A	T	A	0.0722291	0.0088821	0.516394	0.538946	FALSE	TRUE	TRUE	18235995	0.706744	0.0236079	reported	textfile	5	18236104	0.0161631	7.86756e-06	7738	TRUE	reported	textfile	0.00257411	19.9647	20.544
	rs2938453	C	T	C	T	0.0722782	0.00884943	0.516624	0.538982	FALSE	FALSE	FALSE	18234584	0.707843	0.023614	reported	textfile	5	18234693	0.0161716	7.84242e-06	7738	TRUE	reported	textfile	0.0025749	19.9708	20.544
	rs2938454	G	C	G	C	0.0717179	0.00849232	0.507291	0.545551	FALSE	TRUE	TRUE	18234486	0.719669	0.0236621	reported	textfile	5	18234595	0.0161411	8.86421e-06	7738	TRUE	reported	textfile	0.0025448	19.7368	20.544
	rs2962154	C	T	C	T	0.0716212	0.00884274	0.516585	0.538946	FALSE	FALSE	FALSE	18250138	0.707973	0.0236072	reported	textfile	5	18250247	0.0162054	9.88895e-06	7738	TRUE	reported	textfile	0.00251791	19.5277	20.544
	rs2972884	G	A	G	A	0.0714873	0.00864466	0.505847	0.539602	FALSE	FALSE	FALSE	18230621	0.71444	0.0236258	reported	textfile	5	18230730	0.0161393	9.44931e-06	7738	TRUE	reported	textfile	0.00252906	19.6145	20.544
	rs2972891	G	A	G	A	0.0723683	0.00986959	0.516623	0.539021	FALSE	FALSE	FALSE	18234220	0.675991	0.0236149	reported	textfile	5	18234329	0.0161718	7.64188e-06	7738	TRUE	reported	textfile	0.00258124	20.0202	20.544
	rs2972892	G	T	G	T	0.0717078	0.00951652	0.507249	0.545578	FALSE	FALSE	FALSE	18234243	0.687556	0.0236627	reported	textfile	5	18234352	0.0161408	8.88587e-06	7738	TRUE	reported	textfile	0.00254418	19.732	20.544
	rs2972893	G	T	G	T	0.072252	0.00887171	0.516422	0.53896	FALSE	FALSE	FALSE	18235253	0.7071	0.0236104	reported	textfile	5	18235362	0.0161713	7.89805e-06	7738	TRUE	reported	textfile	0.00257313	19.9571	20.544
	rs2972921	C	T	C	T	0.0718625	0.0117762	0.506294	0.546154	FALSE	FALSE	FALSE	18195442	0.618451	0.0236447	reported	textfile	5	18195551	0.0161397	8.48692e-06	7738	TRUE	reported	textfile	0.00255549	19.8199	20.544
	rs2972927	C	T	C	T	0.0714762	0.0127675	0.506443	0.543493	FALSE	FALSE	FALSE	18178116	0.589327	0.0236518	reported	textfile	5	18178225	0.0161416	9.50846e-06	7738	TRUE	reported	textfile	0.00252756	19.6028	20.544
	rs315822	C	T	C	T	0.0713584	0.0110642	0.507201	0.545424	FALSE	FALSE	FALSE	18201306	0.639738	0.0236382	reported	textfile	5	18201415	0.0161456	9.88417e-06	7738	TRUE	reported	textfile	0.00251801	19.5285	20.544
	rs315824	G	A	G	A	0.0714829	0.0121108	0.50645	0.545946	FALSE	FALSE	FALSE	18199585	0.608421	0.0236387	reported	textfile	5	18199694	0.0161322	9.37627e-06	7738	TRUE	reported	textfile	0.00253097	19.6293	20.544
	rs315825	C	A	C	A	0.0714443	0.0121168	0.506492	0.54595	FALSE	FALSE	FALSE	18198825	0.608253	0.0236394	reported	textfile	5	18198934	0.0161325	9.48528e-06	7738	TRUE	reported	textfile	0.00252816	19.6074	20.544
	rs315846	G	C	G	C	0.07162	0.0120933	0.506297	0.543315	FALSE	TRUE	TRUE	18191151	0.608962	0.0236401	reported	textfile	5	18191260	0.0161394	9.09704e-06	7738	TRUE	reported	textfile	0.00253841	19.6871	20.544
	rs35429685	A	G	A	G	-0.135346	-0.022954	0.0781595	0.967002	FALSE	FALSE	FALSE	95727642	0.728385	0.0660977	reported	textfile	6	96175518	0.0305298	9.28239e-06	7738	TRUE	reported	textfile	0.00253345	19.6486	20.544
	rs3785822	A	G	A	G	0.101068	-0.0485587	0.17816	0.850213	FALSE	FALSE	FALSE	61479562	0.141562	0.0330332	reported	textfile	17	59556923	0.0211622	1.7892e-06	7738	TRUE	reported	textfile	0.00293899	22.8031	20.544
	rs4360820	A	G	A	G	0.0806898	0.0310018	0.321884	0.665727	FALSE	FALSE	FALSE	71355197	0.214889	0.0249968	reported	textfile	13	71929329	0.0174464	3.7455e-06	7738	TRUE	reported	textfile	0.00275675	21.3852	20.544
	rs4472353	C	T	C	T	0.0987951	0.0171116	0.822923	0.102362	FALSE	FALSE	FALSE	95630950	0.662096	0.0391552	reported	textfile	6	96078826	0.0213109	3.55386e-06	7738	TRUE	reported	textfile	0.00276971	21.486	20.544
	rs447794	C	G	C	G	-0.106603	0.0512244	0.861372	0.831309	FALSE	TRUE	FALSE	58394439	0.102405	0.0313624	reported	textfile	15	58686638	0.0236906	6.80143e-06	7738	TRUE	reported	textfile	0.0026099	20.243	20.544
	rs453891	G	T	G	T	0.0714746	0.00893813	0.506039	0.539866	FALSE	FALSE	FALSE	18212384	0.705136	0.0236211	reported	textfile	5	18212493	0.0161265	9.33039e-06	7738	TRUE	reported	textfile	0.00253217	19.6386	20.544
	rs493987	C	T	C	T	-0.106529	-0.0507088	0.86416	0.168492	FALSE	FALSE	FALSE	58395707	0.106491	0.0314148	reported	textfile	15	58687906	0.0238522	7.96141e-06	7738	TRUE	reported	textfile	0.00257118	19.9419	20.544
	rs56210724	C	T	C	T	0.131657	0.0125652	0.093528	0.919776	FALSE	FALSE	FALSE	14898006	0.773035	0.0435676	reported	textfile	21	16270327	0.0293572	7.30298e-06	7738	TRUE	reported	textfile	0.0025924	20.107	20.544
	rs5756419	A	T	A	T	0.0844728	-0.0115165	0.293243	0.323921	FALSE	TRUE	FALSE	36950253	0.649415	0.0253346	reported	textfile	22	37346295	0.0178876	2.33056e-06	7738	TRUE	reported	textfile	0.00287376	22.2955	20.544
	rs6000503	C	T	C	T	0.0836999	0.0116157	0.294197	0.674732	FALSE	FALSE	FALSE	36949270	0.646776	0.0253482	reported	textfile	22	37345312	0.017833	2.68522e-06	7738	TRUE	reported	textfile	0.00283882	22.0236	20.544
	rs6021447	G	A	G	A	-0.170522	-0.0806036	0.0500702	0.944828	FALSE	FALSE	FALSE	51800960	0.122224	0.0521535	reported	textfile	20	50417499	0.0373507	4.98506e-06	7738	TRUE	reported	textfile	0.00268637	20.8378	20.544
	rs6021448	G	A	G	A	-0.170527	-0.0805976	0.0500669	0.944828	FALSE	FALSE	FALSE	51801055	0.12225	0.0521533	reported	textfile	20	50417594	0.037353	4.98804e-06	7738	TRUE	reported	textfile	0.0026862	20.8364	20.544
	rs6065218	G	A	G	A	0.122387	0.00485517	0.148047	0.883439	FALSE	FALSE	FALSE	40234135	0.894769	0.0367058	reported	textfile	20	38862775	0.0260522	2.63039e-06	7738	TRUE	reported	textfile	0.00284391	22.0633	20.544
	rs6504045	G	A	G	A	0.0836504	-0.0703486	0.265145	0.750295	FALSE	FALSE	FALSE	61477751	0.0100254	0.0273203	reported	textfile	17	59555112	0.0183189	4.96295e-06	7738	TRUE	reported	textfile	0.00268745	20.8461	20.544
	rs67763506	G	C	G	C	0.100919	0.0485902	0.178172	0.149555	FALSE	TRUE	FALSE	61480531	0.141534	0.0330522	reported	textfile	17	59557892	0.02116	1.84833e-06	7738	TRUE	reported	textfile	0.00293097	22.7406	20.544
	rs7182175	T	A	T	A	-0.0838417	-0.0185681	0.73131	0.61408	FALSE	TRUE	FALSE	98359504	0.446952	0.0244154	reported	textfile	15	98902733	0.0183223	4.74078e-06	7738	TRUE	reported	textfile	0.00269872	20.9338	20.544
	rs7214133	A	G	A	G	0.095875	-0.0469181	0.179553	0.844951	FALSE	FALSE	FALSE	61482610	0.149694	0.0325682	reported	textfile	17	59559971	0.0209573	4.76716e-06	7738	TRUE	reported	textfile	0.00269736	20.9232	20.544
	rs72495313	G	A	G	A	-0.134414	-0.00579217	0.0790575	0.968179	FALSE	FALSE	FALSE	95670602	0.931271	0.067159	reported	textfile	6	96118478	0.0301315	8.16131e-06	7738	TRUE	reported	textfile	0.00256509	19.8946	20.544
	rs74019425	T	G	T	G	0.107744	0.0509553	0.135986	0.83133	FALSE	FALSE	FALSE	58395266	0.104254	0.0313654	reported	textfile	15	58687465	0.0238236	6.10914e-06	7738	TRUE	reported	textfile	0.00263631	20.4484	20.544
	rs7452311	C	G	C	G	-0.13459	0.00579827	0.0791254	0.0318211	FALSE	TRUE	FALSE	95653218	0.931199	0.0671591	reported	textfile	6	96101094	0.0301333	7.95152e-06	7738	TRUE	reported	textfile	0.00257149	19.9444	20.544
	rs74672559	T	C	T	C	-0.134358	-0.00579217	0.0790542	0.968179	FALSE	FALSE	FALSE	95660913	0.931271	0.067159	reported	textfile	6	96108789	0.0301313	8.23057e-06	7738	TRUE	reported	textfile	0.002563	19.8783	20.544
	rs7489699	A	G	A	G	0.0786776	0.0292725	0.320843	0.669382	FALSE	FALSE	FALSE	71329773	0.242754	0.0250593	reported	textfile	13	71903905	0.0174798	6.76176e-06	7738	TRUE	reported	textfile	0.00261135	20.2543	20.544
	rs7497636	T	C	T	C	0.104797	0.0568151	0.139507	0.833918	FALSE	FALSE	FALSE	58393432	0.0717282	0.0315492	reported	textfile	15	58685631	0.0235994	8.9685e-06	7738	TRUE	reported	textfile	0.00254192	19.7144	20.544
	rs75265045	A	G	A	G	-0.134327	-0.00579217	0.0790641	0.968179	FALSE	FALSE	FALSE	95661429	0.931271	0.067159	reported	textfile	6	96109305	0.0301318	8.2737e-06	7738	TRUE	reported	textfile	0.00256173	19.8685	20.544
	rs76079185	A	T	A	T	-0.134295	0.00579217	0.0790509	0.0318212	FALSE	TRUE	FALSE	95658088	0.931271	0.067159	reported	textfile	6	96105964	0.0301311	8.31094e-06	7738	TRUE	reported	textfile	0.00256063	19.8599	20.544
	rs76094919	T	C	T	C	-0.133324	-0.00355636	0.078573	0.968065	FALSE	FALSE	FALSE	95675854	0.957737	0.0671087	reported	textfile	6	96123730	0.0301698	9.91083e-06	7738	TRUE	reported	textfile	0.00251738	19.5236	20.544
	rs76301071	A	G	A	G	-0.135185	-0.00633108	0.0790932	0.96819	FALSE	FALSE	FALSE	95644518	0.924952	0.0672101	reported	textfile	6	96092394	0.03022	7.69963e-06	7738	TRUE	reported	textfile	0.00257939	20.0058	20.544
	rs76679589	T	C	T	C	0.10838	0.0553958	0.137241	0.83407	FALSE	FALSE	FALSE	58394492	0.0793177	0.0315706	reported	textfile	15	58686691	0.0238439	5.48302e-06	7738	TRUE	reported	textfile	0.00266291	20.6553	20.544
	rs77754601	C	T	C	T	-0.133335	-0.00579217	0.0786341	0.968179	FALSE	FALSE	FALSE	95674805	0.931271	0.067159	reported	textfile	6	96122681	0.0301677	9.87916e-06	7738	TRUE	reported	textfile	0.00251814	19.5295	20.544
	rs78048358	G	A	G	A	0.119819	0.00314848	0.148073	0.8837	FALSE	FALSE	FALSE	40223308	0.931546	0.0366532	reported	textfile	20	38851948	0.0260192	4.12411e-06	7738	TRUE	reported	textfile	0.00273304	21.2008	20.544
	rs78626446	G	A	G	A	-0.135024	-0.00579827	0.0790709	0.968179	FALSE	FALSE	FALSE	95652854	0.931199	0.0671591	reported	textfile	6	96100730	0.0302166	7.87535e-06	7738	TRUE	reported	textfile	0.00257385	19.9627	20.544
	rs79434723	T	C	T	C	-0.133788	-0.00579217	0.0790996	0.968179	FALSE	FALSE	FALSE	95654793	0.931271	0.067159	reported	textfile	6	96102669	0.0301332	9.00098e-06	7738	TRUE	reported	textfile	0.00254103	19.7075	20.544
	rs79676117	C	A	C	A	-0.171166	-0.0814038	0.0501703	0.944868	FALSE	FALSE	FALSE	51799422	0.118669	0.052169	reported	textfile	20	50415961	0.0373321	4.54057e-06	7738	TRUE	reported	textfile	0.00270934	21.0164	20.544
	rs8032310	A	G	A	G	0.107802	0.0502181	0.135881	0.831284	FALSE	FALSE	FALSE	58395663	0.109524	0.0313797	reported	textfile	15	58687862	0.0238453	6.158e-06	7738	TRUE	reported	textfile	0.00263435	20.4332	20.544
	rs8079367	T	C	T	C	0.102189	-0.070228	0.162372	0.824229	FALSE	FALSE	FALSE	61475051	0.0235196	0.0310073	reported	textfile	17	59552412	0.0223431	4.79402e-06	7738	TRUE	reported	textfile	0.002696	20.9127	20.544
	rs8079753	A	G	A	G	0.0964075	-0.0510649	0.24166	0.76179	FALSE	FALSE	FALSE	61475088	0.0648664	0.0276598	reported	textfile	17	59552449	0.0192844	5.75559e-07	7738	TRUE	reported	textfile	0.00321944	24.986	20.544
	rs8080416	C	T	C	T	0.0940916	-0.0488215	0.255869	0.752814	FALSE	FALSE	FALSE	61474977	0.0741669	0.0273421	reported	textfile	17	59552338	0.0188315	5.83795e-07	7738	TRUE	reported	textfile	0.00321591	24.9586	20.544
	rs920917	C	A	C	A	0.110506	0.0538585	0.134139	0.834008	FALSE	FALSE	FALSE	58396279	0.0882226	0.0315913	reported	textfile	15	58688478	0.0239977	4.12781e-06	7738	TRUE	reported	textfile	0.00273285	21.1992	20.544
	rs9318015	A	G	A	G	0.0780213	0.0308497	0.322392	0.668876	FALSE	FALSE	FALSE	71325070	0.21832	0.0250605	reported	textfile	13	71899202	0.0174775	8.04081e-06	7738	TRUE	reported	textfile	0.00256875	19.923	20.544
	rs9592784	T	A	T	A	0.0792218	-0.0291907	0.32051	0.330779	FALSE	TRUE	FALSE	71328110	0.244105	0.0250609	reported	textfile	13	71902242	0.0174858	5.88071e-06	7738	TRUE	reported	textfile	0.00264569	20.5214	20.544
	rs9592787	T	C	T	C	0.0788414	0.0292037	0.320728	0.669389	FALSE	FALSE	FALSE	71333039	0.243854	0.0250588	reported	textfile	13	71907171	0.0174695	6.38881e-06	7738	TRUE	reported	textfile	0.00262529	20.3627	20.544
	rs9592788	A	G	A	G	0.0788359	0.0292026	0.320737	0.66939	FALSE	FALSE	FALSE	71333388	0.24387	0.0250587	reported	textfile	13	71907520	0.0174692	6.39617e-06	7738	TRUE	reported	textfile	0.00262501	20.3606	20.544
	rs9592789	A	G	A	G	0.0787559	0.0286949	0.320747	0.669373	FALSE	FALSE	FALSE	71337989	0.25218	0.0250595	reported	textfile	13	71912121	0.0174689	6.53356e-06	7738	TRUE	reported	textfile	0.00261979	20.32	20.544
	rs9599828	G	A	G	A	0.078926	0.0292303	0.320682	0.669385	FALSE	FALSE	FALSE	71331226	0.243432	0.0250591	reported	textfile	13	71905358	0.0174774	6.30507e-06	7738	TRUE	reported	textfile	0.00262854	20.388	20.544
	rs9599829	T	C	T	C	0.0789816	0.0292311	0.320896	0.669386	FALSE	FALSE	FALSE	71331771	0.243418	0.0250591	reported	textfile	13	71905903	0.0174844	6.26441e-06	7738	TRUE	reported	textfile	0.00263013	20.4004	20.544
	rs9599830	C	G	C	G	0.0788999	-0.0292034	0.320718	0.330611	FALSE	TRUE	FALSE	71333054	0.243858	0.0250588	reported	textfile	13	71907186	0.0174705	6.29622e-06	7738	TRUE	reported	textfile	0.00262888	20.3906	20.544
	rs9599831	A	G	A	G	0.0787862	0.0292078	0.320754	0.669393	FALSE	FALSE	FALSE	71334411	0.243779	0.0250583	reported	textfile	13	71908543	0.0174695	6.48485e-06	7738	TRUE	reported	textfile	0.00262163	20.3342	20.544
	rs9599832	G	A	G	A	0.0788128	0.0292134	0.32077	0.669396	FALSE	FALSE	FALSE	71335226	0.243685	0.0250581	reported	textfile	13	71909358	0.0174682	6.42851e-06	7738	TRUE	reported	textfile	0.00262378	20.351	20.544
	rs9599833	C	T	C	T	0.0791172	0.0290033	0.321713	0.668871	FALSE	FALSE	FALSE	71343526	0.246856	0.0250455	reported	textfile	13	71917658	0.0174676	5.91589e-06	7738	TRUE	reported	textfile	0.00264421	20.5099	20.544
	rs9599834	T	C	T	C	0.0788745	0.0299089	0.32019	0.669192	FALSE	FALSE	FALSE	71344855	0.232443	0.0250475	reported	textfile	13	71918987	0.0174659	6.3042e-06	7738	TRUE	reported	textfile	0.00262857	20.3882	20.544
	rs9599836	A	T	A	T	0.080393	-0.0299151	0.322375	0.330814	FALSE	TRUE	FALSE	71357767	0.232055	0.0250318	reported	textfile	13	71931899	0.0174773	4.22795e-06	7738	TRUE	reported	textfile	0.00272692	21.1532	20.544
	rs9599837	A	G	A	G	0.0796854	0.0295557	0.320538	0.669773	FALSE	FALSE	FALSE	71363828	0.238066	0.0250507	reported	textfile	13	71937960	0.017535	5.50985e-06	7738	TRUE	reported	textfile	0.0026617	20.6459	20.544
	rs9599838	C	G	C	G	0.0811623	-0.0293242	0.322964	0.330462	FALSE	TRUE	FALSE	71367850	0.241972	0.0250619	reported	textfile	13	71941982	0.017518	3.60272e-06	7738	TRUE	reported	textfile	0.00276635	21.4599	20.544
GCST90027470	rs1039558	C	T	C	T	-0.0720119	-0.0117912	0.434159	0.48901	FALSE	FALSE	FALSE	18289330	0.617351	0.0236008	reported	textfile	5	18289439	0.0162084	8.87687e-06	7738	TRUE	reported	textfile	0.00254445	19.734	20.6145
	rs10746847	T	C	T	C	-0.0719064	0.0114676	0.550525	0.359191	FALSE	FALSE	FALSE	70555466	0.638165	0.0243853	reported	textfile	9	73170382	0.0161578	8.5765e-06	7738	TRUE	reported	textfile	0.00255289	19.7997	20.6145
	rs10746848	T	G	T	G	-0.0718085	0.0114446	0.550483	0.359184	FALSE	FALSE	FALSE	70557097	0.638832	0.0243848	reported	textfile	9	73172013	0.0161621	8.87095e-06	7738	TRUE	reported	textfile	0.00254461	19.7353	20.6145
	rs10746849	A	G	A	G	-0.0721055	0.0133996	0.551266	0.358491	FALSE	FALSE	FALSE	70566544	0.582732	0.0243896	reported	textfile	9	73181460	0.0161574	8.09375e-06	7738	TRUE	reported	textfile	0.00256714	19.9105	20.6145
	rs11190920	C	G	C	G	-0.0839281	0.0209207	0.308236	0.301705	FALSE	TRUE	FALSE	101313439	0.415271	0.0256806	reported	textfile	10	103073196	0.0175877	1.82427e-06	7738	TRUE	reported	textfile	0.00293421	22.7659	20.6145
	rs11190924	A	G	A	G	-0.0844876	-0.0210207	0.307075	0.698182	FALSE	FALSE	FALSE	101316203	0.41311	0.025684	reported	textfile	10	103075960	0.0176115	1.60813e-06	7738	TRUE	reported	textfile	0.00296534	23.0081	20.6145
	rs11247298	T	C	T	C	-0.0846356	0.0186983	0.731294	0.385909	FALSE	FALSE	FALSE	98361030	0.443805	0.0244171	reported	textfile	15	98904259	0.0183229	3.85381e-06	7738	TRUE	reported	textfile	0.00274975	21.3307	20.6145
	rs12191883	C	T	C	T	0.0832945	0.0161193	0.476724	0.559453	FALSE	FALSE	FALSE	123832133	0.497722	0.0237721	reported	textfile	6	124153278	0.0180977	4.17484e-06	7738	TRUE	reported	textfile	0.00273005	21.1774	20.6145
	rs12411910	T	C	T	C	-0.0800299	-0.0198959	0.318416	0.698718	FALSE	FALSE	FALSE	101309215	0.438466	0.0256793	reported	textfile	10	103068972	0.017315	3.80076e-06	7738	TRUE	reported	textfile	0.00275317	21.3573	20.6145
	rs12412605	T	C	T	C	-0.0845042	-0.0213111	0.307081	0.698214	FALSE	FALSE	FALSE	101316447	0.406672	0.0256832	reported	textfile	10	103076204	0.0176115	1.6007e-06	7738	TRUE	reported	textfile	0.0029665	23.0172	20.6145
	rs12415307	G	A	G	A	-0.0898982	-0.0217102	0.289443	0.698266	FALSE	FALSE	FALSE	101316495	0.398043	0.0256889	reported	textfile	10	103076252	0.0183857	1.01056e-06	7738	TRUE	reported	textfile	0.00308016	23.9017	20.6145
	rs12594526	C	T	C	T	-0.085367	0.018568	0.731372	0.38592	FALSE	FALSE	FALSE	98360315	0.446953	0.0244154	reported	textfile	15	98903544	0.0182804	3.01419e-06	7738	TRUE	reported	textfile	0.00281033	21.802	20.6145
	rs12769525	A	G	A	G	-0.0777448	-0.0235834	0.316271	0.699273	FALSE	FALSE	FALSE	101305605	0.35835	0.0256757	reported	textfile	10	103065362	0.0173606	7.52627e-06	7738	TRUE	reported	textfile	0.002585	20.0494	20.6145
	rs1716276	T	A	T	A	0.0929155	-0.0127721	0.791532	0.82762	FALSE	TRUE	FALSE	49241738	0.682856	0.0312607	reported	textfile	19	49744995	0.0200474	3.57306e-06	7738	TRUE	reported	textfile	0.00276839	21.4757	20.6145
	rs17601584	C	T	C	T	0.0824993	-0.0457557	0.2542	0.761172	FALSE	FALSE	FALSE	61475321	0.0975304	0.0276145	reported	textfile	17	59552682	0.0184755	7.99429e-06	7738	TRUE	reported	textfile	0.00257017	19.9341	20.6145
	rs17630210	C	T	C	T	-0.0744959	-0.00874221	0.373488	0.542733	FALSE	FALSE	FALSE	18293374	0.712171	0.0236953	reported	textfile	5	18293483	0.0168431	9.73733e-06	7738	TRUE	reported	textfile	0.00252171	19.5573	20.6145
	rs1806788	A	G	A	G	-0.0717963	0.0114989	0.550424	0.359196	FALSE	FALSE	FALSE	70560460	0.637224	0.0243836	reported	textfile	9	73175376	0.0161602	8.88014e-06	7738	TRUE	reported	textfile	0.00254434	19.7332	20.6145
	rs1827616	C	T	C	T	0.07341	0.00826065	0.507147	0.545503	FALSE	FALSE	FALSE	18235067	0.726976	0.0236593	reported	textfile	5	18235176	0.0161052	5.16048e-06	7738	TRUE	reported	textfile	0.00267784	20.7714	20.6145
	rs1934471	A	G	A	G	-0.0724339	0.0136234	0.551399	0.35847	FALSE	FALSE	FALSE	70564295	0.576443	0.0243889	reported	textfile	9	73179211	0.0161571	7.35699e-06	7738	TRUE	reported	textfile	0.00259061	20.093	20.6145
	rs2309741	A	G	A	G	-0.0718615	0.011871	0.551034	0.358751	FALSE	FALSE	FALSE	70558765	0.626387	0.024385	reported	textfile	9	73173681	0.0161555	8.66283e-06	7738	TRUE	reported	textfile	0.00255043	19.7806	20.6145
	rs2309743	T	C	T	C	-0.0718807	0.0118484	0.55104	0.358748	FALSE	FALSE	FALSE	70558293	0.627045	0.0243849	reported	textfile	9	73173209	0.0161548	8.60716e-06	7738	TRUE	reported	textfile	0.00255201	19.7929	20.6145
	rs2634527	C	T	A	T	-0.0750373	0.196734	0.498505	0.00109991	TRUE	FALSE	FALSE	58586830	0.678703	0.474935	reported	textfile	8	59499389	0.0167956	7.90697e-06	7738	TRUE	reported	textfile	0.00257286	19.955	20.6145
	rs2682614	C	G	C	G	0.0906115	-0.0120464	0.799815	0.831552	FALSE	TRUE	FALSE	49238631	0.702891	0.0315829	reported	textfile	19	49741888	0.0202968	8.03249e-06	7738	TRUE	reported	textfile	0.00256901	19.925	20.6145
	rs2682615	T	C	T	C	0.0919538	0.0132999	0.789971	0.172455	FALSE	FALSE	FALSE	49238062	0.670469	0.0312567	reported	textfile	19	49741319	0.019984	4.1974e-06	7738	TRUE	reported	textfile	0.00272872	21.1671	20.6145
	rs2871324	T	C	T	C	-0.0719887	0.0134245	0.551334	0.35849	FALSE	FALSE	FALSE	70565061	0.582013	0.0243885	reported	textfile	9	73179977	0.0161556	8.35218e-06	7738	TRUE	reported	textfile	0.00255942	19.8504	20.6145
	rs2938443	C	T	C	T	-0.0719542	-0.0117989	0.434221	0.489	FALSE	FALSE	FALSE	18288886	0.617126	0.0236012	reported	textfile	5	18288995	0.0162056	8.99228e-06	7738	TRUE	reported	textfile	0.00254126	19.7092	20.6145
	rs2938450	G	A	G	A	0.0729785	0.00888262	0.516406	0.538946	FALSE	FALSE	FALSE	18236397	0.706726	0.0236079	reported	textfile	5	18236506	0.0161252	6.01811e-06	7738	TRUE	reported	textfile	0.00263999	20.477	20.6145
	rs2938451	T	A	T	A	0.0728911	0.0088821	0.516394	0.538946	FALSE	TRUE	TRUE	18235995	0.706744	0.0236079	reported	textfile	5	18236104	0.0161254	6.17647e-06	7738	TRUE	reported	textfile	0.00263363	20.4275	20.6145
	rs2938453	C	T	C	T	0.0729892	0.00884943	0.516624	0.538982	FALSE	FALSE	FALSE	18234584	0.707843	0.023614	reported	textfile	5	18234693	0.0161339	6.06932e-06	7738	TRUE	reported	textfile	0.00263793	20.461	20.6145
	rs2938454	G	C	G	C	0.0733438	0.00849232	0.507291	0.545551	FALSE	TRUE	TRUE	18234486	0.719669	0.0236621	reported	textfile	5	18234595	0.0161035	5.25037e-06	7738	TRUE	reported	textfile	0.00267359	20.7383	20.6145
	rs2962149	C	T	C	T	0.0717762	0.00886141	0.515397	0.538945	FALSE	FALSE	FALSE	18245489	0.70739	0.0236076	reported	textfile	5	18245598	0.0161431	8.73836e-06	7738	TRUE	reported	textfile	0.0025483	19.764	20.6145
	rs2962154	C	T	C	T	0.0723846	0.00884274	0.516585	0.538946	FALSE	FALSE	FALSE	18250138	0.707973	0.0236072	reported	textfile	5	18250247	0.0161676	7.56502e-06	7738	TRUE	reported	textfile	0.00258374	20.0396	20.6145
	rs2962175	G	A	G	A	-0.072529	-0.0117856	0.433426	0.488271	FALSE	FALSE	FALSE	18287281	0.617472	0.0235976	reported	textfile	5	18287390	0.0162824	8.41066e-06	7738	TRUE	reported	textfile	0.00255768	19.8369	20.6145
	rs2972877	T	C	T	C	-0.0721351	-0.0141298	0.434116	0.489295	FALSE	FALSE	FALSE	18275953	0.549499	0.0236083	reported	textfile	5	18276062	0.0163065	9.7022e-06	7738	TRUE	reported	textfile	0.00252259	19.5641	20.6145
	rs2972884	G	A	G	A	0.071341	0.00864466	0.505847	0.539602	FALSE	FALSE	FALSE	18230621	0.71444	0.0236258	reported	textfile	5	18230730	0.0161016	9.39399e-06	7738	TRUE	reported	textfile	0.00253053	19.6258	20.6145
	rs2972891	G	A	G	A	0.0730731	0.00986959	0.516623	0.539021	FALSE	FALSE	FALSE	18234220	0.675991	0.0236149	reported	textfile	5	18234329	0.0161341	5.92284e-06	7738	TRUE	reported	textfile	0.00264391	20.5075	20.6145
	rs2972892	G	T	G	T	0.07332	0.00951652	0.507249	0.545578	FALSE	FALSE	FALSE	18234243	0.687556	0.0236627	reported	textfile	5	18234352	0.0161031	5.28482e-06	7738	TRUE	reported	textfile	0.00267199	20.7259	20.6145
	rs2972893	G	T	G	T	0.072958	0.00887171	0.516422	0.53896	FALSE	FALSE	FALSE	18235253	0.7071	0.0236104	reported	textfile	5	18235362	0.0161335	6.12195e-06	7738	TRUE	reported	textfile	0.00263581	20.4445	20.6145
	rs352812	G	T	G	T	0.0925733	0.0114648	0.798761	0.168504	FALSE	FALSE	FALSE	49245011	0.716559	0.0315782	reported	textfile	19	49748268	0.0203619	5.4572e-06	7738	TRUE	reported	textfile	0.00266408	20.6644	20.6145
	rs352813	G	C	G	C	0.0930551	-0.0117086	0.797411	0.831047	FALSE	TRUE	FALSE	49248539	0.710691	0.0315656	reported	textfile	19	49751796	0.0203054	4.5887e-06	7738	TRUE	reported	textfile	0.00270677	20.9964	20.6145
	rs35450589	T	A	T	A	-0.0823912	0.0201022	0.323876	0.308389	FALSE	TRUE	FALSE	101307136	0.431286	0.025543	reported	textfile	10	103066893	0.0172582	1.8058e-06	7738	TRUE	reported	textfile	0.00293673	22.7855	20.6145
	rs4472353	C	T	C	T	0.0973552	0.0171116	0.822923	0.102362	FALSE	FALSE	FALSE	95630950	0.662096	0.0391552	reported	textfile	6	96078826	0.0212612	4.67175e-06	7738	TRUE	reported	textfile	0.00270233	20.9619	20.6145
	rs4744603	G	A	G	A	-0.0718944	0.0114855	0.551123	0.359175	FALSE	FALSE	FALSE	70554820	0.637635	0.0243849	reported	textfile	9	73169736	0.0161685	8.72549e-06	7738	TRUE	reported	textfile	0.00254867	19.7669	20.6145
	rs4745016	A	G	A	G	-0.0720676	0.0130712	0.550715	0.358927	FALSE	FALSE	FALSE	70563746	0.591951	0.0243861	reported	textfile	9	73178662	0.0161576	8.18465e-06	7738	TRUE	reported	textfile	0.00256438	19.8891	20.6145
	rs6560143	T	C	T	C	-0.0718418	0.0119834	0.551324	0.358694	FALSE	FALSE	FALSE	70553764	0.623153	0.0243869	reported	textfile	9	73168680	0.0161688	8.86196e-06	7738	TRUE	reported	textfile	0.00254486	19.7372	20.6145
	rs7182175	T	A	T	A	-0.0855231	-0.0185681	0.73131	0.61408	FALSE	TRUE	FALSE	98359504	0.446952	0.0244154	reported	textfile	15	98902733	0.0182795	2.88809e-06	7738	TRUE	reported	textfile	0.00282087	21.884	20.6145
	rs7772407	T	C	T	C	-0.0833765	-0.016305	0.522792	0.440628	FALSE	FALSE	FALSE	123835147	0.492779	0.0237718	reported	textfile	6	124156292	0.0181189	4.19218e-06	7738	TRUE	reported	textfile	0.00272903	21.1695	20.6145
	rs7853032	C	G	C	G	-0.0720308	-0.012295	0.55136	0.641558	FALSE	TRUE	TRUE	70565531	0.61421	0.0243913	reported	textfile	9	73180447	0.016155	8.2448e-06	7738	TRUE	reported	textfile	0.00256259	19.8751	20.6145
	rs7863194	A	T	A	T	-0.0724311	-0.0134795	0.551405	0.641516	FALSE	TRUE	TRUE	70563028	0.580434	0.0243863	reported	textfile	9	73177944	0.0161573	7.36444e-06	7738	TRUE	reported	textfile	0.00259034	20.0909	20.6145
	rs7872938	A	G	A	G	-0.0725357	0.0122938	0.551324	0.358856	FALSE	FALSE	FALSE	70562587	0.614056	0.0243782	reported	textfile	9	73177503	0.0161592	7.16242e-06	7738	TRUE	reported	textfile	0.0025972	20.1443	20.6145
	rs8079753	A	G	A	G	0.0866377	-0.0510649	0.24166	0.76179	FALSE	FALSE	FALSE	61475088	0.0648664	0.0276598	reported	textfile	17	59552449	0.0192394	6.69592e-06	7738	TRUE	reported	textfile	0.00261376	20.273	20.6145
	rs8080416	C	T	C	T	0.0876717	-0.0488215	0.255869	0.752814	FALSE	FALSE	FALSE	61474977	0.0741669	0.0273421	reported	textfile	17	59552338	0.0187876	3.06408e-06	7738	TRUE	reported	textfile	0.00280625	21.7703	20.6145
GCST90027471	rs10180405	G	A	G	A	0.0799762	0.00713535	0.508284	0.478655	FALSE	FALSE	FALSE	1401078	0.762757	0.0236378	reported	textfile	2	1404850	0.0162578	8.6882e-07	7738	TRUE	reported	textfile	0.00311755	24.1928	22.0326
	rs10183226	G	T	G	T	0.080534	0.00724662	0.50809	0.478614	FALSE	FALSE	FALSE	1400984	0.759159	0.0236367	reported	textfile	2	1404756	0.0162641	7.35919e-07	7738	TRUE	reported	textfile	0.00315861	24.5124	22.0326
	rs10183390	C	T	C	T	0.0799595	0.00713528	0.508301	0.478655	FALSE	FALSE	FALSE	1401113	0.76276	0.0236378	reported	textfile	2	1404885	0.0162589	8.74863e-07	7738	TRUE	reported	textfile	0.00311583	24.1794	22.0326
	rs11211643	G	A	G	A	0.0831748	0.0113362	0.51565	0.472552	FALSE	FALSE	FALSE	1398816	0.631806	0.0236573	reported	textfile	2	1402588	0.0163098	3.40244e-07	7738	TRUE	reported	textfile	0.00334966	26	22.0326
	rs11211644	T	C	T	C	0.0741053	-0.00851834	0.485784	0.52958	FALSE	FALSE	FALSE	1400723	0.718608	0.0236411	reported	textfile	2	1404495	0.016263	5.19661e-06	7738	TRUE	reported	textfile	0.00267611	20.758	22.0326
	rs11678288	A	T	A	T	0.0754771	-0.0359446	0.606648	0.574704	FALSE	TRUE	TRUE	65547553	0.132028	0.0238652	reported	textfile	2	65774687	0.0165063	4.81637e-06	7738	TRUE	reported	textfile	0.00269482	20.9035	22.0326
	rs11682231	C	T	C	T	0.075787	-0.0141145	0.495748	0.518512	FALSE	FALSE	FALSE	1400313	0.549988	0.0236116	reported	textfile	2	1404085	0.0162759	3.21818e-06	7738	TRUE	reported	textfile	0.00279419	21.6764	22.0326
	rs11682968	T	C	T	C	0.0801282	0.000796861	0.515448	0.468233	FALSE	FALSE	FALSE	1408458	0.973223	0.02374	reported	textfile	2	1412230	0.0163032	8.88444e-07	7738	TRUE	reported	textfile	0.00311202	24.1498	22.0326
	rs11685159	C	A	C	A	0.0795168	0.000881272	0.515665	0.468233	FALSE	FALSE	FALSE	1408510	0.970389	0.0237412	reported	textfile	2	1412282	0.0162984	1.06723e-06	7738	TRUE	reported	textfile	0.00306666	23.7966	22.0326
	rs11686524	G	T	G	T	0.0800682	0.000828614	0.515468	0.468234	FALSE	FALSE	FALSE	1408472	0.972157	0.0237403	reported	textfile	2	1412244	0.0163045	9.07068e-07	7738	TRUE	reported	textfile	0.00310688	24.1098	22.0326
	rs11900674	A	G	A	G	0.0782131	0.00687568	0.514337	0.477038	FALSE	FALSE	FALSE	1402766	0.771408	0.0236657	reported	textfile	2	1406538	0.0162932	1.58398e-06	7738	TRUE	reported	textfile	0.00296911	23.0374	22.0326
	rs12328062	C	T	C	T	0.0806375	0.00780058	0.507326	0.478877	FALSE	FALSE	FALSE	1396795	0.741363	0.0236346	reported	textfile	2	1400567	0.0164231	9.10689e-07	7738	TRUE	reported	textfile	0.00310588	24.1019	22.0326
	rs12329058	C	G	C	G	0.0812536	-0.00773744	0.507165	0.521109	FALSE	TRUE	TRUE	1396836	0.743377	0.023634	reported	textfile	2	1400608	0.0164256	7.54536e-07	7738	TRUE	reported	textfile	0.00315241	24.4642	22.0326
	rs12329063	A	G	A	G	0.0805353	0.00778764	0.507278	0.478877	FALSE	FALSE	FALSE	1396914	0.741775	0.0236345	reported	textfile	2	1400686	0.0164186	9.33663e-07	7738	TRUE	reported	textfile	0.00309973	24.054	22.0326
	rs12471910	G	A	G	A	0.0794545	0.000834688	0.515714	0.468234	FALSE	FALSE	FALSE	1409030	0.971953	0.0237404	reported	textfile	2	1412802	0.0162973	1.08628e-06	7738	TRUE	reported	textfile	0.00306228	23.7626	22.0326
	rs12661464	A	G	A	G	-0.112067	-0.017818	0.121313	0.861472	FALSE	FALSE	FALSE	65383832	0.604488	0.0344005	reported	textfile	6	66093725	0.0250501	7.68794e-06	7738	TRUE	reported	textfile	0.0025798	20.009	22.0326
	rs13003991	G	C	G	C	0.0758458	-0.0352521	0.606803	0.573741	FALSE	TRUE	TRUE	65545822	0.139617	0.0238638	reported	textfile	2	65772956	0.0164963	4.27091e-06	7738	TRUE	reported	textfile	0.00272443	21.1338	22.0326
	rs13193692	T	G	T	G	0.085911	0.000279772	0.230994	0.712661	FALSE	FALSE	FALSE	125758786	0.99145	0.0261085	reported	textfile	6	126079932	0.0193355	8.86441e-06	7738	TRUE	reported	textfile	0.00254479	19.7367	22.0326
	rs13400534	T	C	T	C	0.0796645	0.000800717	0.515293	0.468243	FALSE	FALSE	FALSE	1408111	0.973094	0.0237401	reported	textfile	2	1411883	0.0163026	1.02591e-06	7738	TRUE	reported	textfile	0.00307644	23.8728	22.0326
	rs13403150	G	A	G	A	0.0747834	-0.0139547	0.495951	0.519073	FALSE	FALSE	FALSE	1402287	0.554677	0.0236213	reported	textfile	2	1406059	0.0162832	4.37623e-06	7738	TRUE	reported	textfile	0.00271844	21.0872	22.0326
	rs1365015	C	T	C	T	0.120342	-0.021554	0.890119	0.095533	FALSE	FALSE	FALSE	25687632	0.592094	0.0402274	reported	textfile	8	25545148	0.0257087	2.85476e-06	7738	TRUE	reported	textfile	0.00282369	21.9059	22.0326
	rs1514681	C	T	C	T	-0.0759507	-0.00217318	0.401127	0.646356	FALSE	FALSE	FALSE	1393272	0.929642	0.0246127	reported	textfile	2	1397044	0.0171447	9.4241e-06	7738	TRUE	reported	textfile	0.00252973	19.6197	22.0326
	rs1567920	G	A	G	A	0.0794575	0.000771867	0.5157	0.46811	FALSE	FALSE	FALSE	1409454	0.974072	0.0237486	reported	textfile	2	1413226	0.0162979	1.08625e-06	7738	TRUE	reported	textfile	0.00306229	23.7626	22.0326
	rs1673457	A	G	A	G	-0.0763754	-0.0379878	0.372216	0.620122	FALSE	FALSE	FALSE	65544511	0.117758	0.0242849	reported	textfile	2	65771645	0.0167021	4.8126e-06	7738	TRUE	reported	textfile	0.00269503	20.9051	22.0326
	rs1673458	A	T	A	T	-0.0763754	0.0379878	0.372216	0.379878	FALSE	TRUE	FALSE	65544512	0.117758	0.0242849	reported	textfile	2	65771646	0.0167021	4.8126e-06	7738	TRUE	reported	textfile	0.00269503	20.9051	22.0326
	rs1770803	T	A	T	A	-0.0778079	0.0159076	0.441319	0.445545	FALSE	TRUE	TRUE	42975454	0.503307	0.0237676	reported	textfile	1	43441125	0.0163712	2.00683e-06	7738	TRUE	reported	textfile	0.00291066	22.5826	22.0326
	rs1972113	C	T	C	T	0.0780194	0.013163	0.500097	0.489275	FALSE	FALSE	FALSE	1403274	0.578004	0.0236615	reported	textfile	2	1407046	0.0162573	1.59441e-06	7738	TRUE	reported	textfile	0.00296749	23.0248	22.0326
	rs2071403	G	A	G	A	0.0723236	0.00743401	0.507689	0.454845	FALSE	FALSE	FALSE	1413472	0.755264	0.0238496	reported	textfile	2	1417244	0.0162746	8.83243e-06	7738	TRUE	reported	textfile	0.00254568	19.7436	22.0326
	rs2467703	G	T	G	T	0.119539	-0.0209696	0.890183	0.095568	FALSE	FALSE	FALSE	25688567	0.602363	0.0402483	reported	textfile	8	25546083	0.0257317	3.39078e-06	7738	TRUE	reported	textfile	0.00278128	21.576	22.0326
	rs2467707	C	T	C	T	0.121636	-0.0231052	0.890023	0.095522	FALSE	FALSE	FALSE	25684350	0.566728	0.0403319	reported	textfile	8	25541866	0.0256176	2.05305e-06	7738	TRUE	reported	textfile	0.00290506	22.539	22.0326
	rs2634527	C	T	A	T	-0.0756236	0.196734	0.498505	0.00109991	TRUE	FALSE	FALSE	58586830	0.678703	0.474935	reported	textfile	8	59499389	0.0167962	6.71815e-06	7738	TRUE	reported	textfile	0.00261293	20.2666	22.0326
	rs3785822	A	G	A	G	0.0966643	-0.0485587	0.17816	0.850213	FALSE	FALSE	FALSE	61479562	0.141562	0.0330332	reported	textfile	17	59556923	0.0211136	4.68792e-06	7738	TRUE	reported	textfile	0.00270149	20.9554	22.0326
	rs55781504	A	T	A	T	0.0743773	-0.0031422	0.501057	0.50393	FALSE	TRUE	TRUE	1402571	0.89423	0.0236339	reported	textfile	2	1406343	0.0162928	4.99379e-06	7738	TRUE	reported	textfile	0.00268592	20.8342	22.0326
	rs56217611	C	T	C	T	0.0744622	0.0110471	0.485393	0.503111	FALSE	FALSE	FALSE	1396298	0.6402	0.0236343	reported	textfile	2	1400070	0.0164355	5.88207e-06	7738	TRUE	reported	textfile	0.00264562	20.5208	22.0326
	rs56283137	A	C	A	C	0.0739172	-0.00853597	0.488051	0.529566	FALSE	FALSE	FALSE	1402037	0.718112	0.0236464	reported	textfile	2	1405809	0.0162524	5.41402e-06	7738	TRUE	reported	textfile	0.00266605	20.6797	22.0326
	rs5756419	A	T	A	T	0.0829004	-0.0115165	0.293243	0.323921	FALSE	TRUE	FALSE	36950253	0.649415	0.0253346	reported	textfile	22	37346295	0.0178465	3.3979e-06	7738	TRUE	reported	textfile	0.0027808	21.5722	22.0326
	rs6000503	C	T	C	T	0.0822307	0.0116157	0.294197	0.674732	FALSE	FALSE	FALSE	36949270	0.646776	0.0253482	reported	textfile	22	37345312	0.0177921	3.80487e-06	7738	TRUE	reported	textfile	0.00275288	21.3551	22.0326
	rs6705904	G	T	G	T	0.0757363	0.0359957	0.607211	0.425319	FALSE	FALSE	FALSE	65542897	0.131497	0.0238663	reported	textfile	2	65770031	0.0164978	4.41764e-06	7738	TRUE	reported	textfile	0.0027161	21.069	22.0326
	rs67763506	G	C	G	C	0.0964672	0.0485902	0.178172	0.149555	FALSE	TRUE	FALSE	61480531	0.141534	0.0330522	reported	textfile	17	59557892	0.0211114	4.89046e-06	7738	TRUE	reported	textfile	0.00269108	20.8744	22.0326
	rs702903	G	C	G	C	-0.0766461	0.037075	0.372628	0.379181	FALSE	TRUE	FALSE	65538558	0.127032	0.0242969	reported	textfile	2	65765692	0.0167354	4.65286e-06	7738	TRUE	reported	textfile	0.00270336	20.9699	22.0326
	rs702904	T	C	T	C	-0.0761393	-0.0375365	0.371941	0.620581	FALSE	FALSE	FALSE	65538960	0.122286	0.0242916	reported	textfile	2	65766094	0.0167326	5.3555e-06	7738	TRUE	reported	textfile	0.00266871	20.7004	22.0326
	rs702905	G	A	G	A	-0.0761688	-0.0367947	0.37199	0.619616	FALSE	FALSE	FALSE	65539054	0.129781	0.0242875	reported	textfile	2	65766188	0.016732	5.30689e-06	7738	TRUE	reported	textfile	0.00267097	20.7179	22.0326
	rs702906	T	C	T	C	-0.0765212	-0.0382071	0.372397	0.62016	FALSE	FALSE	FALSE	65539745	0.115666	0.0242857	reported	textfile	2	65766879	0.0167248	4.75499e-06	7738	TRUE	reported	textfile	0.00269799	20.9281	22.0326
	rs702909	T	G	T	G	-0.0763994	-0.0383761	0.37206	0.620253	FALSE	FALSE	FALSE	65540113	0.114103	0.0242884	reported	textfile	2	65767247	0.0166913	4.7127e-06	7738	TRUE	reported	textfile	0.0027002	20.9453	22.0326
	rs702912	T	G	T	G	-0.0766944	-0.0381333	0.371625	0.620982	FALSE	FALSE	FALSE	65541337	0.11689	0.0243203	reported	textfile	2	65768471	0.0167049	4.40869e-06	7738	TRUE	reported	textfile	0.00271662	21.073	22.0326
	rs702915	T	C	T	C	-0.0763893	-0.0349377	0.372371	0.620661	FALSE	FALSE	FALSE	65543462	0.150343	0.0242907	reported	textfile	2	65770596	0.0166942	4.74395e-06	7738	TRUE	reported	textfile	0.00269856	20.9325	22.0326
	rs702916	G	A	G	A	-0.0765388	-0.0371849	0.372393	0.61914	FALSE	FALSE	FALSE	65544090	0.125648	0.0242802	reported	textfile	2	65771224	0.016692	4.532e-06	7738	TRUE	reported	textfile	0.00270981	21.0201	22.0326
	rs702919	T	C	T	C	-0.0767234	-0.0378018	0.372232	0.620073	FALSE	FALSE	FALSE	65545157	0.119528	0.0242824	reported	textfile	2	65772291	0.0167017	4.35372e-06	7738	TRUE	reported	textfile	0.00271971	21.0971	22.0326
	rs702920	T	C	T	C	-0.0767649	-0.038085	0.372326	0.620464	FALSE	FALSE	FALSE	65546865	0.116922	0.0242916	reported	textfile	2	65773999	0.0167036	4.31261e-06	7738	TRUE	reported	textfile	0.00272203	21.1151	22.0326
	rs702953	A	G	A	G	-0.0765566	-0.0378863	0.372348	0.620003	FALSE	FALSE	FALSE	65542314	0.118813	0.0242896	reported	textfile	2	65769448	0.0166949	4.52606e-06	7738	TRUE	reported	textfile	0.00271013	21.0225	22.0326
	rs74949229	A	G	A	G	-0.144988	-0.039767	0.0938701	0.935586	FALSE	FALSE	FALSE	9484983	0.403759	0.0476294	reported	textfile	10	9526946	0.0283792	3.23966e-07	7738	TRUE	reported	textfile	0.00336181	26.0947	22.0326
	rs75967282	C	G	C	G	-0.18223	-0.0195806	0.0513866	0.141248	FALSE	TRUE	FALSE	61443077	0.567874	0.0342805	reported	textfile	17	59520438	0.0378294	1.4562e-06	7738	TRUE	reported	textfile	0.00298987	23.199	22.0326
	rs78813269	T	C	T	C	0.187702	0.00353152	0.0525137	0.957042	FALSE	FALSE	FALSE	65545253	0.951019	0.0574911	reported	textfile	2	65772387	0.0417175	6.81585e-06	7738	TRUE	reported	textfile	0.00260938	20.239	22.0326
	rs840785	G	A	G	A	-0.0764501	-0.0373023	0.37207	0.619175	FALSE	FALSE	FALSE	65541842	0.124545	0.0242857	reported	textfile	2	65768976	0.0166916	4.64644e-06	7738	TRUE	reported	textfile	0.00270368	20.9724	22.0326
	rs840787	G	C	G	C	-0.07672	0.0355032	0.372707	0.380918	FALSE	TRUE	FALSE	65548756	0.143819	0.0242887	reported	textfile	2	65775890	0.0167062	4.38379e-06	7738	TRUE	reported	textfile	0.00271801	21.0838	22.0326
	rs841576	G	T	G	T	-0.0774425	-0.0159028	0.441403	0.554464	FALSE	FALSE	FALSE	42974805	0.503422	0.0237669	reported	textfile	1	43440476	0.0163725	2.24476e-06	7738	TRUE	reported	textfile	0.00288301	22.3674	22.0326
	rs9326166	A	G	A	G	-0.0979289	-0.0275893	0.260416	0.721623	FALSE	FALSE	FALSE	1414209	0.301353	0.0266941	reported	textfile	2	1417981	0.0202029	1.25173e-06	7738	TRUE	reported	textfile	0.00302725	23.4899	22.0326
	rs9326167	A	G	A	G	-0.0946579	-0.0185495	0.257589	0.723554	FALSE	FALSE	FALSE	1414211	0.488596	0.0267847	reported	textfile	2	1417983	0.0202485	2.94232e-06	7738	TRUE	reported	textfile	0.00281627	21.8482	22.0326
	rs938325	C	T	C	T	0.0766645	0.00441928	0.495421	0.497055	FALSE	FALSE	FALSE	1397675	0.851494	0.0236058	reported	textfile	2	1401447	0.0164287	3.06366e-06	7738	TRUE	reported	textfile	0.00280629	21.7706	22.0326
	rs938326	T	C	T	C	0.0802385	0.00600797	0.507689	0.479028	FALSE	FALSE	FALSE	1398009	0.79928	0.0236275	reported	textfile	2	1401781	0.01626	8.02639e-07	7738	TRUE	reported	textfile	0.00313712	24.3451	22.0326
	rs9445542	T	C	T	C	-0.116241	-0.0185091	0.126577	0.885053	FALSE	FALSE	FALSE	65412164	0.621136	0.0374495	reported	textfile	6	66122057	0.0244585	2.00817e-06	7738	TRUE	reported	textfile	0.00291048	22.5812	22.0326
	rs9677074	C	G	C	G	0.0800222	0.00224506	0.51489	0.530654	FALSE	TRUE	TRUE	1405581	0.924689	0.0237501	reported	textfile	2	1409353	0.0162964	9.08866e-07	7738	TRUE	reported	textfile	0.0031064	24.106	22.0326
	rs9711204	T	C	T	C	0.074977	0.00450387	0.496643	0.494117	FALSE	FALSE	FALSE	1402240	0.848859	0.0236331	reported	textfile	2	1406012	0.0162808	4.11993e-06	7738	TRUE	reported	textfile	0.0027333	21.2028	22.0326
GCST90027472	rs112245799	A	G	A	G	0.306567	0.00900404	0.0550295	0.914044	FALSE	FALSE	FALSE	33319255	0.831833	0.0424015	reported	textfile	11	33340801	0.0668041	4.45277e-06	7738	TRUE	reported	textfile	0.00271416	21.0539	20.8417
	rs2236141	T	C	T	C	0.19862	0.0141731	0.125015	0.88988	FALSE	FALSE	FALSE	28741882	0.704443	0.0373636	reported	textfile	22	29137870	0.0422383	2.57164e-06	7738	TRUE	reported	textfile	0.00284948	22.1065	20.8417
	rs2566156	T	A	T	A	-0.153408	0.0328528	0.764796	0.773779	FALSE	TRUE	FALSE	39009351	0.250171	0.0285693	reported	textfile	4	39010971	0.0345524	9.00181e-06	7738	TRUE	reported	textfile	0.00254101	19.7073	20.8417
	rs2712003	T	C	T	C	-0.153555	-0.033081	0.764622	0.226249	FALSE	FALSE	FALSE	39010887	0.246875	0.028568	reported	textfile	4	39012507	0.0345511	8.8184e-06	7738	TRUE	reported	textfile	0.00254606	19.7466	20.8417
	rs35829597	A	G	A	G	0.196374	0.014225	0.125159	0.878436	FALSE	FALSE	FALSE	28746250	0.693017	0.0360341	reported	textfile	22	29142238	0.0422774	3.40259e-06	7738	TRUE	reported	textfile	0.00278044	21.5695	20.8417
	rs4557268	T	A	T	A	-0.153813	0.0327055	0.763887	0.773812	FALSE	TRUE	FALSE	39011644	0.251869	0.0285432	reported	textfile	4	39013264	0.0345757	8.64311e-06	7738	TRUE	reported	textfile	0.00255097	19.7848	20.8417
	rs5762767	T	C	T	C	0.196498	0.0138918	0.12481	0.889769	FALSE	FALSE	FALSE	28745253	0.709823	0.0373342	reported	textfile	22	29141241	0.042268	3.3378e-06	7738	TRUE	reported	textfile	0.00278518	21.6063	20.8417
	rs79950843	G	C	G	C	0.282755	0.0172469	0.0652969	0.0884705	FALSE	TRUE	FALSE	33310910	0.679853	0.0417942	reported	textfile	11	33332456	0.0614621	4.21531e-06	7738	TRUE	reported	textfile	0.00272766	21.1589	20.8417
GCST90027473	rs10001785	A	T	A	T	-0.0815298	0.0304913	0.366779	0.312431	FALSE	TRUE	FALSE	58436729	0.230737	0.025442	reported	textfile	4	59302895	0.0172005	2.13742e-06	7738	TRUE	reported	textfile	0.00289509	22.4615	22.8929
	rs10003709	T	C	T	C	-0.0814755	-0.0304584	0.366346	0.687545	FALSE	FALSE	FALSE	58441744	0.231257	0.0254429	reported	textfile	4	59307910	0.0172303	2.26063e-06	7738	TRUE	reported	textfile	0.00288129	22.354	22.8929
	rs10018154	A	G	A	G	-0.0828158	-0.0268497	0.369004	0.685505	FALSE	FALSE	FALSE	58474694	0.290493	0.0254008	reported	textfile	4	59340860	0.0173092	1.71423e-06	7738	TRUE	reported	textfile	0.00294958	22.8855	22.8929
	rs10029317	A	T	A	T	-0.0828416	0.0252768	0.396736	0.328567	FALSE	TRUE	FALSE	58420648	0.314694	0.0251405	reported	textfile	4	59286814	0.0168256	8.49924e-07	7738	TRUE	reported	textfile	0.00312298	24.235	22.8929
	rs10866460	T	C	T	C	-0.0846938	-0.00959146	0.393209	0.69984	FALSE	FALSE	FALSE	58421938	0.709923	0.0257863	reported	textfile	4	59288104	0.0168551	5.03895e-07	7738	TRUE	reported	textfile	0.00325235	25.2423	22.8929
	rs11133564	T	A	T	A	-0.0821012	0.0253213	0.397235	0.328542	FALSE	TRUE	FALSE	58421688	0.313829	0.0251398	reported	textfile	4	59287854	0.0168253	1.06282e-06	7738	TRUE	reported	textfile	0.00306768	23.8046	22.8929
	rs117665320	A	G	A	G	-0.19331	-0.0545429	0.0631703	0.96479	FALSE	FALSE	FALSE	34684972	0.39108	0.063595	reported	textfile	19	35175877	0.0361138	8.66024e-08	7738	TRUE	reported	textfile	0.00368917	28.6451	22.8929
	rs11933815	G	C	G	C	-0.081472	0.0305041	0.366366	0.31243	FALSE	TRUE	FALSE	58440549	0.230544	0.0254422	reported	textfile	4	59306715	0.0172289	2.2585e-06	7738	TRUE	reported	textfile	0.00288151	22.3558	22.8929
	rs11934862	G	A	G	A	-0.0817444	-0.0305003	0.366114	0.68757	FALSE	FALSE	FALSE	58462163	0.230603	0.0254422	reported	textfile	4	59328329	0.0173139	2.34331e-06	7738	TRUE	reported	textfile	0.00287242	22.2851	22.8929
	rs12647734	C	T	C	T	-0.0826665	-0.0231465	0.369028	0.672138	FALSE	FALSE	FALSE	58472414	0.357217	0.0251406	reported	textfile	4	59338580	0.0173112	1.79416e-06	7738	TRUE	reported	textfile	0.00293831	22.7978	22.8929
	rs13102310	C	T	C	T	-0.0823393	-0.0266016	0.36909	0.685532	FALSE	FALSE	FALSE	58475553	0.294986	0.0254015	reported	textfile	4	59341719	0.0173105	1.96875e-06	7738	TRUE	reported	textfile	0.0029154	22.6195	22.8929
	rs13105985	C	T	C	T	-0.081725	-0.0305003	0.366088	0.68757	FALSE	FALSE	FALSE	58458032	0.230603	0.0254422	reported	textfile	4	59324198	0.0173153	2.36059e-06	7738	TRUE	reported	textfile	0.0028706	22.2709	22.8929
	rs13118727	C	G	C	G	-0.0813511	0.0305003	0.366183	0.31243	FALSE	TRUE	FALSE	58457926	0.230603	0.0254422	reported	textfile	4	59324092	0.0173169	2.62997e-06	7738	TRUE	reported	textfile	0.00284394	22.0635	22.8929
	rs13121620	G	C	G	C	-0.0825829	0.0266016	0.36903	0.314468	FALSE	TRUE	FALSE	58475431	0.294986	0.0254015	reported	textfile	4	59341597	0.0173104	1.83578e-06	7738	TRUE	reported	textfile	0.00293266	22.7538	22.8929
	rs13133017	C	A	C	A	-0.0814262	-0.0310585	0.366785	0.687545	FALSE	FALSE	FALSE	58450240	0.222192	0.0254428	reported	textfile	4	59316406	0.0172706	2.4203e-06	7738	TRUE	reported	textfile	0.00286443	22.2229	22.8929
	rs1551325	G	T	G	T	-0.081571	-0.0305414	0.366802	0.68758	FALSE	FALSE	FALSE	58444531	0.229984	0.0254427	reported	textfile	4	59310697	0.0172694	2.31878e-06	7738	TRUE	reported	textfile	0.002875	22.3051	22.8929
	rs1580072	C	T	C	T	-0.0825375	-0.0305041	0.366918	0.68757	FALSE	FALSE	FALSE	58430427	0.230544	0.0254422	reported	textfile	4	59296593	0.017199	1.59478e-06	7738	TRUE	reported	textfile	0.00296741	23.0242	22.8929
	rs1580077	C	T	C	T	-0.0816575	-0.0313747	0.366105	0.687483	FALSE	FALSE	FALSE	58464977	0.21754	0.0254439	reported	textfile	4	59331143	0.0173144	2.40337e-06	7738	TRUE	reported	textfile	0.00286617	22.2364	22.8929
	rs17290326	A	T	A	T	-0.0827092	0.0131305	0.369548	0.332645	FALSE	TRUE	FALSE	58483913	0.600196	0.0250525	reported	textfile	4	59350079	0.0173225	1.80016e-06	7738	TRUE	reported	textfile	0.00293752	22.7916	22.8929
	rs1869463	G	A	G	A	-0.081509	-0.0303671	0.36637	0.687465	FALSE	FALSE	FALSE	58438966	0.23267	0.0254435	reported	textfile	4	59305132	0.0172286	2.23383e-06	7738	TRUE	reported	textfile	0.00288422	22.3768	22.8929
	rs2007685	C	T	C	T	-0.0813669	-0.0305807	0.366386	0.687611	FALSE	FALSE	FALSE	58443118	0.229403	0.0254437	reported	textfile	4	59309284	0.0172302	2.33152e-06	7738	TRUE	reported	textfile	0.00287367	22.2948	22.8929
	rs2037458	G	A	G	A	-0.0819813	-0.0303495	0.366364	0.686959	FALSE	FALSE	FALSE	58455371	0.232469	0.0254179	reported	textfile	4	59321537	0.0172807	2.0944e-06	7738	TRUE	reported	textfile	0.00290013	22.5006	22.8929
	rs2140073	C	T	C	T	-0.0816657	-0.0310468	0.366101	0.687545	FALSE	FALSE	FALSE	58460781	0.222365	0.0254427	reported	textfile	4	59326947	0.0173142	2.39712e-06	7738	TRUE	reported	textfile	0.00286681	22.2414	22.8929
	rs2177125	T	C	T	C	-0.0817444	-0.0305003	0.366114	0.68757	FALSE	FALSE	FALSE	58460855	0.230603	0.0254422	reported	textfile	4	59327021	0.0173139	2.34331e-06	7738	TRUE	reported	textfile	0.00287242	22.2851	22.8929
	rs28564056	C	G	C	G	-0.0825095	0.0140889	0.369618	0.332671	FALSE	TRUE	FALSE	58486880	0.573838	0.025051	reported	textfile	4	59353046	0.0173237	1.90928e-06	7738	TRUE	reported	textfile	0.00292298	22.6785	22.8929
	rs56114299	G	A	G	A	0.178582	-0.0927232	0.0521839	0.929949	FALSE	FALSE	FALSE	31588320	0.0500012	0.0473089	reported	textfile	14	32057526	0.0371369	1.51869e-06	7738	TRUE	reported	textfile	0.00297947	23.1181	22.8929
	rs62121962	T	C	T	C	-0.165772	-0.0570676	0.0724375	0.958562	FALSE	FALSE	FALSE	34622758	0.331076	0.0587146	reported	textfile	19	35113663	0.0336534	8.39885e-07	7738	TRUE	reported	textfile	0.00312591	24.2578	22.8929
	rs6554532	A	G	A	G	-0.0828039	-0.0263011	0.369007	0.685536	FALSE	FALSE	FALSE	58467845	0.300453	0.0254003	reported	textfile	4	59334011	0.0173094	1.72056e-06	7738	TRUE	reported	textfile	0.00294867	22.8784	22.8929
	rs6554533	G	C	G	C	-0.0827152	0.0263294	0.368981	0.31446	FALSE	TRUE	FALSE	58467941	0.299931	0.0254002	reported	textfile	4	59334107	0.0173099	1.7662e-06	7738	TRUE	reported	textfile	0.00294221	22.8281	22.8929
	rs6846190	T	C	T	C	-0.0816575	-0.0308027	0.366105	0.687495	FALSE	FALSE	FALSE	58465710	0.226039	0.0254436	reported	textfile	4	59331876	0.0173144	2.40337e-06	7738	TRUE	reported	textfile	0.00286617	22.2364	22.8929
	rs74549683	A	C	A	C	-0.153811	-0.107894	0.0668789	0.964024	FALSE	FALSE	FALSE	34802693	0.0857433	0.062791	reported	textfile	19	35293597	0.0338144	5.39796e-06	7738	TRUE	reported	textfile	0.00266675	20.6852	22.8929
	rs74806369	G	A	G	A	-0.175885	-0.0578632	0.06529	0.963035	FALSE	FALSE	FALSE	34632930	0.351773	0.0621414	reported	textfile	19	35123835	0.0357438	8.62343e-07	7738	TRUE	reported	textfile	0.0031194	24.2072	22.8929
	rs75506401	C	T	C	T	-0.150857	-0.0120082	0.0687763	0.96534	FALSE	FALSE	FALSE	70989651	0.853512	0.065036	reported	textfile	3	71038802	0.0326449	3.81601e-06	7738	TRUE	reported	textfile	0.00275217	21.3495	22.8929
	rs7664867	G	A	G	A	-0.0813086	-0.0305041	0.366403	0.68757	FALSE	FALSE	FALSE	58442425	0.230544	0.0254422	reported	textfile	4	59308591	0.0172286	2.36527e-06	7738	TRUE	reported	textfile	0.00287009	22.2669	22.8929
	rs7665651	T	C	T	C	-0.0819782	-0.0259785	0.369258	0.685823	FALSE	FALSE	FALSE	58481658	0.306551	0.0254072	reported	textfile	4	59347824	0.017314	2.1928e-06	7738	TRUE	reported	textfile	0.0028888	22.4125	22.8929
	rs76766370	A	G	A	G	0.174577	-0.0942749	0.0525343	0.943515	FALSE	FALSE	FALSE	31593799	0.0714974	0.0523079	reported	textfile	14	32063005	0.0361602	1.37994e-06	7738	TRUE	reported	textfile	0.00300315	23.3024	22.8929
	rs77004407	A	C	A	C	0.1793	-0.0932008	0.0531697	0.92987	FALSE	FALSE	FALSE	31646022	0.0486206	0.0472644	reported	textfile	14	32115228	0.036777	1.08633e-06	7738	TRUE	reported	textfile	0.0030623	23.7627	22.8929
GCST90027474	rs1104906	C	T	C	T	0.111046	-0.0186997	0.69156	0.285618	FALSE	FALSE	FALSE	79232900	0.470193	0.025894	reported	textfile	10	80992657	0.0246626	6.71259e-06	7738	TRUE	reported	textfile	0.00261314	20.2682	20.8372
	rs12427432	C	T	C	T	-0.200781	0.0577717	0.0683299	0.955418	FALSE	FALSE	FALSE	108591929	0.311144	0.0570402	reported	textfile	13	109244277	0.0453045	9.34458e-06	7738	TRUE	reported	textfile	0.00253182	19.6359	20.8372
	rs12429802	A	G	A	G	-0.201646	0.0561866	0.0685371	0.955401	FALSE	FALSE	FALSE	108589693	0.324504	0.057028	reported	textfile	13	109242041	0.0453102	8.57373e-06	7738	TRUE	reported	textfile	0.00255299	19.8004	20.8372
	rs1250593	A	G	A	G	0.111221	-0.0187349	0.691906	0.285671	FALSE	FALSE	FALSE	79235799	0.469195	0.0258845	reported	textfile	10	80995556	0.0246672	6.51703e-06	7738	TRUE	reported	textfile	0.00262039	20.3246	20.8372
	rs13403023	C	G	C	G	-0.130473	-0.0164201	0.222549	0.262924	FALSE	TRUE	FALSE	105182260	0.537662	0.0266407	reported	textfile	2	105798717	0.0274844	2.06281e-06	7738	TRUE	reported	textfile	0.00290387	22.5298	20.8372
	rs140284139	A	G	A	G	-0.201909	0.0528831	0.0683748	0.95536	FALSE	FALSE	FALSE	108579586	0.353333	0.0569772	reported	textfile	13	109231934	0.0454465	8.88035e-06	7738	TRUE	reported	textfile	0.00254434	19.7332	20.8372
	rs1404416	T	C	T	C	0.115296	-0.0234291	0.631226	0.380285	FALSE	FALSE	FALSE	17774648	0.33326	0.0242144	reported	textfile	7	17814272	0.0239238	1.44056e-06	7738	TRUE	reported	textfile	0.00299253	23.2197	20.8372
	rs142513138	A	G	A	G	0.172287	-0.0388274	0.106751	0.820788	FALSE	FALSE	FALSE	24055199	0.207985	0.0308368	reported	textfile	9	24055197	0.0370802	3.37886e-06	7738	TRUE	reported	textfile	0.00278216	21.5828	20.8372
	rs17097518	G	A	G	A	0.193953	0.065652	0.0766726	0.932928	FALSE	FALSE	FALSE	47040358	0.167591	0.0475744	reported	textfile	12	47434141	0.0436641	8.91579e-06	7738	TRUE	reported	textfile	0.00254337	19.7257	20.8372
	rs2449502	T	G	T	G	0.153883	-0.11187	0.14791	0.922777	FALSE	FALSE	FALSE	97787690	0.00930679	0.0430176	reported	textfile	8	98799918	0.0333731	4.00765e-06	7738	TRUE	reported	textfile	0.00274011	21.2557	20.8372
	rs2449558	A	G	A	G	0.148272	-0.0881131	0.154715	0.907454	FALSE	FALSE	FALSE	97790770	0.0316993	0.0410175	reported	textfile	8	98802998	0.032814	6.2263e-06	7738	TRUE	reported	textfile	0.00263164	20.4121	20.8372
	rs2723521	C	T	C	T	0.115642	-0.023777	0.630932	0.380256	FALSE	FALSE	FALSE	17774027	0.326139	0.0242148	reported	textfile	7	17813651	0.0239472	1.37196e-06	7738	TRUE	reported	textfile	0.0030046	23.3136	20.8372
	rs4747915	A	T	A	T	0.111955	-0.0174564	0.330399	0.283364	FALSE	TRUE	FALSE	11476096	0.505918	0.026242	reported	textfile	10	11518095	0.0247343	6.00219e-06	7738	TRUE	reported	textfile	0.00264065	20.4821	20.8372
	rs6723624	C	G	C	G	-0.130095	-0.034899	0.206431	0.244057	FALSE	TRUE	FALSE	105180843	0.202207	0.0273656	reported	textfile	2	105797300	0.0286511	5.60815e-06	7738	TRUE	reported	textfile	0.00265738	20.6123	20.8372
	rs72700025	A	G	A	G	0.172204	-0.0382861	0.106642	0.82078	FALSE	FALSE	FALSE	24049519	0.213903	0.0308037	reported	textfile	9	24049517	0.0370412	3.3358e-06	7738	TRUE	reported	textfile	0.00278533	21.6075	20.8372
	rs7355418	A	G	A	G	-0.126804	0.0188808	0.220471	0.740498	FALSE	FALSE	FALSE	105181205	0.480525	0.026764	reported	textfile	2	105797662	0.0278695	5.36686e-06	7738	TRUE	reported	textfile	0.0026682	20.6964	20.8372
	rs73602733	A	G	A	G	-0.203971	0.0527527	0.0684687	0.955358	FALSE	FALSE	FALSE	108577295	0.354522	0.0569774	reported	textfile	13	109229643	0.0453763	6.95425e-06	7738	TRUE	reported	textfile	0.00260446	20.2007	20.8372
	rs76562182	A	G	A	G	-0.203736	0.0529025	0.0693061	0.95536	FALSE	FALSE	FALSE	108579837	0.353156	0.0569773	reported	textfile	13	109232185	0.0451874	6.52289e-06	7738	TRUE	reported	textfile	0.00262019	20.323	20.8372
	rs9653475	T	G	T	G	-0.125953	0.0125081	0.208333	0.74479	FALSE	FALSE	FALSE	105183306	0.64212	0.0269144	reported	textfile	2	105799763	0.0280317	7.01471e-06	7738	TRUE	reported	textfile	0.0026023	20.1839	20.8372
GCST90027475	rs10170790	T	C	T	C	-0.0855325	-0.0124005	0.552267	0.360131	FALSE	FALSE	FALSE	5375412	0.614147	0.0245962	reported	textfile	2	5515545	0.019134	7.81538e-06	7738	TRUE	reported	textfile	0.00257574	19.9774	22.6633
	rs10846815	A	G	A	G	0.121074	0.0736955	0.136422	0.725014	FALSE	FALSE	FALSE	125047469	0.00611885	0.026883	reported	textfile	12	125532015	0.026949	7.0325e-06	7738	TRUE	reported	textfile	0.00260169	20.1792	22.6633
	rs10846818	T	C	T	C	0.125563	0.0727283	0.135189	0.722049	FALSE	FALSE	FALSE	125067634	0.00661302	0.0267804	reported	textfile	12	125552180	0.0271905	3.87641e-06	7738	TRUE	reported	textfile	0.00274831	21.3195	22.6633
	rs10846819	T	G	T	G	0.125491	0.0709051	0.135316	0.721449	FALSE	FALSE	FALSE	125067834	0.00802047	0.0267445	reported	textfile	12	125552380	0.0271946	3.93904e-06	7738	TRUE	reported	textfile	0.00274434	21.2886	22.6633
	rs10846823	C	T	C	T	0.123192	0.0466291	0.146339	0.725913	FALSE	FALSE	FALSE	125085249	0.0816507	0.02678	reported	textfile	12	125569795	0.0275189	7.58316e-06	7738	TRUE	reported	textfile	0.00258316	20.0351	22.6633
	rs10948290	A	T	A	T	0.0892033	-0.0253381	0.49693	0.463961	FALSE	TRUE	TRUE	46431202	0.283744	0.0236375	reported	textfile	6	46398939	0.0188022	2.09233e-06	7738	TRUE	reported	textfile	0.00290038	22.5026	22.6633
	rs11058017	C	G	C	G	0.123373	-0.0730308	0.133278	0.27482	FALSE	TRUE	FALSE	125050047	0.00660693	0.0268888	reported	textfile	12	125534593	0.0271041	5.31851e-06	7738	TRUE	reported	textfile	0.00267042	20.7137	22.6633
	rs11058026	G	A	G	A	0.125341	0.0709098	0.135189	0.721451	FALSE	FALSE	FALSE	125069809	0.00800958	0.0267416	reported	textfile	12	125554355	0.0271988	4.05938e-06	7738	TRUE	reported	textfile	0.00273696	21.2312	22.6633
	rs114142596	C	T	C	T	-0.161796	0.0139394	0.0693552	0.935845	FALSE	FALSE	FALSE	82516839	0.771369	0.0479699	reported	textfile	1	82982522	0.0365366	9.49598e-06	7738	TRUE	reported	textfile	0.00252785	19.605	22.6633
	rs114383264	G	C	G	C	-0.160325	-0.0120145	0.0795811	0.0690512	FALSE	TRUE	FALSE	82529687	0.79625	0.0465315	reported	textfile	1	82995370	0.0342755	2.90329e-06	7738	TRUE	reported	textfile	0.00281955	21.8737	22.6633
	rs115001375	C	T	C	T	-0.175844	0.023037	0.0755566	0.934439	FALSE	FALSE	FALSE	82553043	0.628468	0.0476084	reported	textfile	1	83018726	0.0352956	6.29158e-07	7738	TRUE	reported	textfile	0.00319738	24.8143	22.6633
	rs11963073	A	G	A	G	0.0968484	-0.0317412	0.512336	0.45282	FALSE	FALSE	FALSE	46459118	0.180635	0.0237087	reported	textfile	6	46426855	0.0195605	7.37446e-07	7738	TRUE	reported	textfile	0.00315808	24.5083	22.6633
	rs12153949	T	C	T	C	-0.112325	0.0554016	0.329437	0.714905	FALSE	FALSE	FALSE	46466075	0.0350663	0.0262867	reported	textfile	6	46433812	0.0227772	8.16131e-07	7738	TRUE	reported	textfile	0.003133	24.3131	22.6633
	rs12228810	C	A	C	A	0.126308	0.0730419	0.133515	0.725182	FALSE	FALSE	FALSE	125055560	0.00659675	0.0268878	reported	textfile	12	125540106	0.0270802	3.0977e-06	7738	TRUE	reported	textfile	0.00280356	21.7493	22.6633
	rs12307506	T	C	T	C	0.121146	0.0744259	0.136013	0.725024	FALSE	FALSE	FALSE	125040386	0.00561203	0.0268721	reported	textfile	12	125524932	0.0269677	7.04726e-06	7738	TRUE	reported	textfile	0.00260118	20.1752	22.6633
	rs12320696	A	G	A	G	0.121009	0.0744147	0.136044	0.725029	FALSE	FALSE	FALSE	125040534	0.0056194	0.0268723	reported	textfile	12	125525080	0.0269632	7.19234e-06	7738	TRUE	reported	textfile	0.00259618	20.1363	22.6633
	rs1473757	T	G	T	G	-0.159589	0.0111339	0.0790589	0.931063	FALSE	FALSE	FALSE	82535077	0.810928	0.0465409	reported	textfile	1	83000760	0.0344015	3.50074e-06	7738	TRUE	reported	textfile	0.00277342	21.5149	22.6633
	rs1527704	G	A	G	A	0.100578	-0.0126898	0.572357	0.37489	FALSE	FALSE	FALSE	46453596	0.602407	0.0243594	reported	textfile	6	46421333	0.020037	5.1775e-07	7738	TRUE	reported	textfile	0.00324564	25.19	22.6633
	rs1527706	A	G	A	G	0.0848838	-0.0276584	0.523	0.447762	FALSE	FALSE	FALSE	46440628	0.243512	0.0237156	reported	textfile	6	46408365	0.0192131	9.96139e-06	7738	TRUE	reported	textfile	0.00251612	19.5138	22.6633
	rs1534367	G	A	G	A	0.109538	-0.0205536	0.559909	0.388301	FALSE	FALSE	FALSE	46460216	0.395235	0.024176	reported	textfile	6	46427953	0.0200628	4.76738e-08	7738	TRUE	reported	textfile	0.0038375	29.8012	22.6633
	rs1576166	T	C	T	C	0.0903842	-0.0449004	0.560505	0.422739	FALSE	FALSE	FALSE	109535894	0.0596417	0.0238397	reported	textfile	13	110188241	0.0201903	7.58316e-06	7738	TRUE	reported	textfile	0.00258314	20.0349	22.6633
	rs1590026	G	A	G	A	0.0989301	-0.0145305	0.574835	0.372309	FALSE	FALSE	FALSE	46450341	0.551145	0.0243781	reported	textfile	6	46418078	0.020006	7.61377e-07	7738	TRUE	reported	textfile	0.00315019	24.4469	22.6633
	rs1609190	A	T	A	T	0.0968965	0.0325773	0.512138	0.547165	FALSE	TRUE	TRUE	46449478	0.169267	0.0237001	reported	textfile	6	46417215	0.0195201	6.9078e-07	7738	TRUE	reported	textfile	0.00317426	24.6343	22.6633
	rs1918477	A	G	A	G	0.100883	-0.013398	0.573353	0.375332	FALSE	FALSE	FALSE	46456185	0.5822	0.0243522	reported	textfile	6	46423922	0.0200371	4.78311e-07	7738	TRUE	reported	textfile	0.00326526	25.3428	22.6633
	rs1934922	A	T	A	T	0.100239	0.0135741	0.573011	0.624586	FALSE	TRUE	TRUE	46461904	0.577121	0.0243441	reported	textfile	6	46429641	0.020123	6.31611e-07	7738	TRUE	reported	textfile	0.00319646	24.8071	22.6633
	rs2056101	T	C	T	C	0.0909124	-0.00994974	0.535799	0.382164	FALSE	FALSE	FALSE	11069694	0.681565	0.0242482	reported	textfile	2	11209820	0.0188903	1.48953e-06	7738	TRUE	reported	textfile	0.0029843	23.1556	22.6633
	rs2056102	G	A	G	A	0.0908698	-0.0096324	0.536273	0.381515	FALSE	FALSE	FALSE	11069885	0.691328	0.0242598	reported	textfile	2	11210011	0.0188975	1.52016e-06	7738	TRUE	reported	textfile	0.00297924	23.1163	22.6633
	rs2178054	T	C	T	C	0.100642	-0.0145241	0.575943	0.372321	FALSE	FALSE	FALSE	46450597	0.551325	0.0243785	reported	textfile	6	46418334	0.0199969	4.83192e-07	7738	TRUE	reported	textfile	0.00326276	25.3233	22.6633
	rs35098678	G	T	G	T	-0.116245	-0.0298108	0.170274	0.859908	FALSE	FALSE	FALSE	46070318	0.380263	0.0339758	reported	textfile	21	47490232	0.0261238	8.59627e-06	7738	TRUE	reported	textfile	0.00255233	19.7954	22.6633
	rs35296932	G	A	G	A	-0.102628	-0.0480177	0.242946	0.712034	FALSE	FALSE	FALSE	41007610	0.0657204	0.0260919	reported	textfile	3	41049101	0.0223393	4.3468e-06	7738	TRUE	reported	textfile	0.00272008	21.0999	22.6633
	rs35902953	C	T	C	T	-0.110677	-0.0225894	0.176468	0.871011	FALSE	FALSE	FALSE	100132864	0.520204	0.0351296	reported	textfile	15	100673069	0.0246929	7.38924e-06	7738	TRUE	reported	textfile	0.0025895	20.0844	22.6633
	rs41474647	T	C	T	C	0.127405	0.0741086	0.136106	0.721066	FALSE	FALSE	FALSE	125065410	0.00562536	0.026765	reported	textfile	12	125549956	0.0271228	2.63585e-06	7738	TRUE	reported	textfile	0.0028434	22.0593	22.6633
	rs4711850	A	G	A	G	0.0998884	-0.0144404	0.576023	0.372347	FALSE	FALSE	FALSE	46443613	0.553648	0.0243801	reported	textfile	6	46411350	0.0200025	5.92039e-07	7738	TRUE	reported	textfile	0.00321244	24.9316	22.6633
	rs4711851	C	T	C	T	0.0987656	-0.0144903	0.574822	0.372449	FALSE	FALSE	FALSE	46449338	0.552245	0.024378	reported	textfile	6	46417075	0.0200053	7.93414e-07	7738	TRUE	reported	textfile	0.00313998	24.3674	22.6633
	rs4714932	A	C	A	C	0.0920518	-0.0282709	0.508458	0.456288	FALSE	FALSE	FALSE	46436034	0.23192	0.0236492	reported	textfile	6	46403771	0.0189983	1.26442e-06	7738	TRUE	reported	textfile	0.00302476	23.4705	22.6633
	rs4714933	A	G	A	G	0.0852509	-0.0278089	0.522579	0.447699	FALSE	FALSE	FALSE	46440000	0.240998	0.0237177	reported	textfile	6	46407737	0.0192302	9.28581e-06	7738	TRUE	reported	textfile	0.00253338	19.648	22.6633
	rs4714935	A	T	A	T	0.100479	0.0212947	0.595926	0.651375	FALSE	TRUE	FALSE	46443405	0.390014	0.024773	reported	textfile	6	46411142	0.020307	7.49791e-07	7738	TRUE	reported	textfile	0.00315398	24.4764	22.6633
	rs4714936	G	A	G	A	0.100575	-0.0154122	0.576047	0.374546	FALSE	FALSE	FALSE	46462895	0.526934	0.0243596	reported	textfile	6	46430632	0.020151	6.00371e-07	7738	TRUE	reported	textfile	0.00320895	24.9043	22.6633
	rs56362503	G	A	G	A	0.0843849	0.00206656	0.469267	0.470365	FALSE	FALSE	FALSE	11071351	0.93032	0.0236335	reported	textfile	2	11211477	0.0188297	7.41242e-06	7738	TRUE	reported	textfile	0.00258874	20.0785	22.6633
	rs59657730	G	A	G	A	0.110105	-0.016421	0.559955	0.384495	FALSE	FALSE	FALSE	46454988	0.497816	0.0242222	reported	textfile	6	46422725	0.0199672	3.50155e-08	7738	TRUE	reported	textfile	0.00391424	30.3996	22.6633
	rs59718054	A	G	A	G	0.0986473	-0.0144932	0.574936	0.372474	FALSE	FALSE	FALSE	46448235	0.552198	0.0243801	reported	textfile	6	46415972	0.0200021	8.14535e-07	7738	TRUE	reported	textfile	0.00313348	24.3168	22.6633
	rs6432166	G	A	G	A	0.0893532	-0.0066658	0.654279	0.294709	FALSE	FALSE	FALSE	11064899	0.797338	0.0259578	reported	textfile	2	11205025	0.0196858	5.65301e-06	7738	TRUE	reported	textfile	0.0026554	20.5969	22.6633
	rs6458504	T	C	T	C	0.0968358	-0.0197239	0.578405	0.364534	FALSE	FALSE	FALSE	46442423	0.421182	0.0245209	reported	textfile	6	46410160	0.0199887	1.26914e-06	7738	TRUE	reported	textfile	0.00302384	23.4634	22.6633
	rs6458505	C	T	C	T	-0.0961089	0.0318061	0.489575	0.546561	FALSE	FALSE	FALSE	46442452	0.17964	0.0237029	reported	textfile	6	46410189	0.0194636	7.89805e-07	7738	TRUE	reported	textfile	0.00314113	24.3763	22.6633
	rs730990	T	C	T	C	0.0905343	-0.00991288	0.536071	0.382168	FALSE	FALSE	FALSE	11070744	0.682713	0.0242509	reported	textfile	2	11210870	0.0188929	1.65151e-06	7738	TRUE	reported	textfile	0.00295879	22.9571	22.6633
	rs738153	T	A	T	A	0.187256	0.0838295	0.0581388	0.0644637	FALSE	TRUE	FALSE	27129676	0.0821826	0.0482287	reported	textfile	22	27525638	0.0422665	9.40763e-06	7738	TRUE	reported	textfile	0.00253017	19.6231	22.6633
	rs7397149	T	C	T	C	0.12211	0.0736287	0.136167	0.725052	FALSE	FALSE	FALSE	125046275	0.00615815	0.0268792	reported	textfile	12	125530821	0.026976	5.99391e-06	7738	TRUE	reported	textfile	0.00264101	20.485	22.6633
	rs7545707	C	T	C	T	-0.161043	0.0110558	0.0709328	0.935019	FALSE	FALSE	FALSE	82511499	0.817432	0.0478916	reported	textfile	1	82977182	0.0364183	9.7771e-06	7738	TRUE	reported	textfile	0.00252069	19.5493	22.6633
	rs7548012	C	T	C	T	-0.159594	0.0117599	0.0705758	0.93515	FALSE	FALSE	FALSE	82511557	0.806316	0.047964	reported	textfile	1	82977240	0.036086	9.75237e-06	7738	TRUE	reported	textfile	0.00252133	19.5543	22.6633
	rs7577930	C	T	C	T	0.0839242	-0.00769143	0.550211	0.344484	FALSE	FALSE	FALSE	11071913	0.756714	0.0248273	reported	textfile	2	11212039	0.0188735	8.72107e-06	7738	TRUE	reported	textfile	0.00254878	19.7678	22.6633
	rs77250123	C	G	C	G	-0.162275	-0.0224463	0.0790806	0.0667338	FALSE	TRUE	FALSE	82542490	0.634245	0.0471797	reported	textfile	1	83008173	0.0344308	2.44028e-06	7738	TRUE	reported	textfile	0.00286243	22.2074	22.6633
	rs79117831	A	C	A	C	-0.201195	0.0146098	0.0516128	0.967014	FALSE	FALSE	FALSE	82565360	0.826322	0.0665834	reported	textfile	1	83031043	0.0425344	2.24321e-06	7738	TRUE	reported	textfile	0.00288318	22.3687	22.6633
	rs79488312	A	G	A	G	-0.161635	0.0114989	0.0713528	0.935026	FALSE	FALSE	FALSE	82505841	0.810297	0.0479036	reported	textfile	1	82971524	0.0362758	8.36065e-06	7738	TRUE	reported	textfile	0.00255915	19.8484	22.6633
	rs79700197	C	A	C	A	0.123392	0.0730681	0.133273	0.725176	FALSE	FALSE	FALSE	125049740	0.00657567	0.026887	reported	textfile	12	125534286	0.0271039	5.29944e-06	7738	TRUE	reported	textfile	0.00267128	20.7204	22.6633
	rs9349359	T	C	T	C	0.0909062	-0.0288741	0.504552	0.459106	FALSE	FALSE	FALSE	46435331	0.222102	0.0236488	reported	textfile	6	46403068	0.019004	1.72242e-06	7738	TRUE	reported	textfile	0.0029484	22.8762	22.6633
	rs9349360	T	C	T	C	0.0934283	-0.0304791	0.508977	0.456903	FALSE	FALSE	FALSE	46438705	0.197696	0.0236613	reported	textfile	6	46406442	0.0192023	1.14188e-06	7738	TRUE	reported	textfile	0.00304997	23.6667	22.6633
	rs9357507	T	C	T	C	0.0883417	-0.0247161	0.496664	0.463944	FALSE	FALSE	FALSE	46431566	0.295717	0.0236368	reported	textfile	6	46399303	0.0187149	2.35386e-06	7738	TRUE	reported	textfile	0.0028713	22.2764	22.6633
	rs9357508	G	T	G	T	0.097518	-0.0325891	0.511754	0.452891	FALSE	FALSE	FALSE	46443540	0.169119	0.0237004	reported	textfile	6	46411277	0.0195114	5.79282e-07	7738	TRUE	reported	textfile	0.00321784	24.9736	22.6633
	rs9367246	C	T	C	T	0.0909062	-0.0288739	0.504552	0.459106	FALSE	FALSE	FALSE	46435364	0.222105	0.0236488	reported	textfile	6	46403101	0.019004	1.72242e-06	7738	TRUE	reported	textfile	0.0029484	22.8762	22.6633
	rs9367247	C	G	C	G	0.100734	0.0134679	0.573317	0.624615	FALSE	TRUE	TRUE	46455390	0.580183	0.0243491	reported	textfile	6	46423127	0.0200356	4.96227e-07	7738	TRUE	reported	textfile	0.00325613	25.2717	22.6633
	rs9381450	G	A	G	A	0.0890735	-0.0245274	0.498468	0.463702	FALSE	FALSE	FALSE	46433433	0.29945	0.0236382	reported	textfile	6	46401170	0.0187678	2.07391e-06	7738	TRUE	reported	textfile	0.00290255	22.5195	22.6633
	rs9381454	T	C	T	C	0.1087	-0.016641	0.559859	0.384519	FALSE	FALSE	FALSE	46461928	0.491994	0.0242178	reported	textfile	6	46429665	0.0200688	6.08205e-08	7738	TRUE	reported	textfile	0.00377698	29.3295	22.6633
	rs9463203	T	C	T	C	0.0912467	-0.0316086	0.508828	0.456211	FALSE	FALSE	FALSE	46436504	0.181565	0.02366	reported	textfile	6	46404241	0.0190117	1.59067e-06	7738	TRUE	reported	textfile	0.00296806	23.0293	22.6633
	rs947137	C	T	C	T	0.0998884	-0.014445	0.576023	0.372347	FALSE	FALSE	FALSE	46444440	0.553522	0.0243801	reported	textfile	6	46412177	0.0200025	5.92039e-07	7738	TRUE	reported	textfile	0.00321244	24.9316	22.6633
	rs9472751	C	T	C	T	0.10043	-0.0106188	0.572304	0.37566	FALSE	FALSE	FALSE	46452964	0.662721	0.0243462	reported	textfile	6	46420701	0.0200355	5.36933e-07	7738	TRUE	reported	textfile	0.00323661	25.1197	22.6633
	rs9472755	G	A	G	A	0.100586	-0.0149737	0.576056	0.374583	FALSE	FALSE	FALSE	46463087	0.538755	0.0243595	reported	textfile	6	46430824	0.0201511	5.98811e-07	7738	TRUE	reported	textfile	0.00320961	24.9095	22.6633
	rs978052	T	A	T	A	0.14247	0.0205578	0.104279	0.142615	FALSE	TRUE	FALSE	31017240	0.539965	0.0335438	reported	textfile	19	31508146	0.0316872	6.91958e-06	7738	TRUE	reported	textfile	0.00260566	20.21	22.6633
GCST90027476	rs1038311	C	T	C	T	-0.0796573	0.0296048	0.683497	0.317996	FALSE	FALSE	FALSE	22631734	0.241646	0.0252842	reported	textfile	8	22489247	0.0174227	4.82992e-06	7738	TRUE	reported	textfile	0.00269414	20.8982	20.6438
	rs10460443	A	G	A	G	0.10428	-0.00280541	0.789414	0.220934	FALSE	FALSE	FALSE	240149850	0.92313	0.0290742	reported	textfile	2	241089267	0.0224112	3.27069e-06	7738	TRUE	reported	textfile	0.00279016	21.6451	20.6438
	rs10514997	T	C	T	C	-0.15594	0.00515434	0.0567666	0.868431	FALSE	FALSE	FALSE	52221661	0.881396	0.0345467	reported	textfile	17	50299021	0.0350463	8.60518e-06	7738	TRUE	reported	textfile	0.00255207	19.7933	20.6438
	rs114125199	G	A	G	A	-0.163689	-0.0630673	0.0534871	0.967034	FALSE	FALSE	FALSE	155295921	0.33842	0.065881	reported	textfile	3	155013710	0.0364984	7.29794e-06	7738	TRUE	reported	textfile	0.0025926	20.1085	20.6438
	rs114342796	A	C	A	C	-0.163381	-0.0631251	0.0539932	0.966588	FALSE	FALSE	FALSE	155250240	0.335701	0.0655713	reported	textfile	3	154968029	0.0368467	9.24656e-06	7738	TRUE	reported	textfile	0.0025344	19.6559	20.6438
	rs115328377	G	A	G	A	-0.161713	-0.0543745	0.0532568	0.968381	FALSE	FALSE	FALSE	155313851	0.41513	0.0667253	reported	textfile	3	155031640	0.0363386	8.57966e-06	7738	TRUE	reported	textfile	0.00255279	19.7989	20.6438
	rs115668747	G	T	G	T	-0.169625	-0.0976417	0.0571408	0.966551	FALSE	FALSE	FALSE	155189644	0.138753	0.0659541	reported	textfile	3	154907433	0.037591	6.41062e-06	7738	TRUE	reported	textfile	0.00262447	20.3563	20.6438
	rs116288386	A	C	A	C	-0.163921	-0.0538192	0.0532248	0.968388	FALSE	FALSE	FALSE	155311062	0.420466	0.0668053	reported	textfile	3	155028851	0.0366645	7.7913e-06	7738	TRUE	reported	textfile	0.00257649	19.9832	20.6438
	rs11647205	A	G	A	G	0.0776841	-0.0380946	0.336996	0.715649	FALSE	FALSE	FALSE	54698323	0.144771	0.0261234	reported	textfile	16	54732235	0.017485	8.87565e-06	7738	TRUE	reported	textfile	0.00254447	19.7343	20.6438
	rs12676084	T	C	T	C	-0.0826694	0.0292977	0.681805	0.318107	FALSE	FALSE	FALSE	22635837	0.246395	0.0252752	reported	textfile	8	22493350	0.017398	2.01744e-06	7738	TRUE	reported	textfile	0.00290936	22.5724	20.6438
	rs140206413	G	A	G	A	0.154647	-0.00687115	0.0655504	0.954849	FALSE	FALSE	FALSE	89914409	0.902589	0.0561404	reported	textfile	1	90379968	0.0327911	2.40386e-06	7738	TRUE	reported	textfile	0.00286613	22.2361	20.6438
	rs1564595	G	A	G	A	-0.0798016	0.0351598	0.683352	0.327051	FALSE	FALSE	FALSE	22631426	0.16155	0.0251163	reported	textfile	8	22488939	0.0174167	4.60744e-06	7738	TRUE	reported	textfile	0.00270574	20.9884	20.6438
	rs16951132	A	T	A	T	-0.131325	0.000617336	0.0813854	0.149686	FALSE	TRUE	FALSE	52219172	0.984999	0.0328344	reported	textfile	17	50296532	0.0295476	8.80826e-06	7738	TRUE	reported	textfile	0.00254633	19.7487	20.6438
	rs17205999	A	G	A	G	0.0759939	-0.0383624	0.343059	0.707262	FALSE	FALSE	FALSE	54694025	0.138839	0.0259183	reported	textfile	16	54727937	0.0171137	8.97367e-06	7738	TRUE	reported	textfile	0.00254177	19.7132	20.6438
	rs17746902	T	G	T	G	-0.0880821	0.0313246	0.660202	0.351859	FALSE	FALSE	FALSE	22634467	0.203172	0.0246153	reported	textfile	8	22491980	0.0172082	3.07815e-07	7738	TRUE	reported	textfile	0.00337449	26.1934	20.6438
	rs1942183	C	G	C	G	0.161558	0.0936782	0.945946	0.954954	FALSE	TRUE	FALSE	71079450	0.0975079	0.0565328	reported	textfile	18	68746686	0.0362937	8.53061e-06	7738	TRUE	reported	textfile	0.0025542	19.8099	20.6438
	rs2003908	C	T	C	T	-0.0824717	0.029858	0.682616	0.317319	FALSE	FALSE	FALSE	22634005	0.237858	0.0252957	reported	textfile	8	22491518	0.0174257	2.21467e-06	7738	TRUE	reported	textfile	0.00288633	22.3933	20.6438
	rs2009212	A	G	A	G	-0.0825348	0.0294973	0.681653	0.318065	FALSE	FALSE	FALSE	22633983	0.243247	0.0252781	reported	textfile	8	22491496	0.0174007	2.10378e-06	7738	TRUE	reported	textfile	0.00289902	22.492	20.6438
	rs2064592	T	G	T	G	-0.0742577	-0.0106261	0.632553	0.402434	FALSE	FALSE	FALSE	56609721	0.661354	0.0242581	reported	textfile	6	56474519	0.0166735	8.44306e-06	7738	TRUE	reported	textfile	0.00255675	19.8297	20.6438
	rs2452966	T	C	T	C	0.078063	-0.0319664	0.66551	0.440177	FALSE	FALSE	FALSE	92027860	0.179641	0.0238224	reported	textfile	6	92737578	0.0172351	5.9182e-06	7738	TRUE	reported	textfile	0.00264414	20.5093	20.6438
	rs2452967	G	A	G	A	0.0763019	-0.0315062	0.663608	0.44154	FALSE	FALSE	FALSE	92032068	0.186146	0.0238311	reported	textfile	6	92741786	0.0172211	9.39183e-06	7738	TRUE	reported	textfile	0.00253058	19.6262	20.6438
	rs2452968	A	G	A	G	0.080069	-0.0324965	0.680031	0.441471	FALSE	FALSE	FALSE	92033400	0.173296	0.0238649	reported	textfile	6	92743118	0.0179375	8.05323e-06	7738	TRUE	reported	textfile	0.00256838	19.9202	20.6438
	rs2698174	A	G	A	G	0.162424	-0.0936397	0.945871	0.045039	FALSE	FALSE	FALSE	71078874	0.097636	0.0565313	reported	textfile	18	68746110	0.0362775	7.56049e-06	7738	TRUE	reported	textfile	0.00258389	20.0407	20.6438
	rs2698177	G	A	G	A	0.161125	-0.0936951	0.945959	0.045049	FALSE	FALSE	FALSE	71079879	0.0974406	0.0565317	reported	textfile	18	68747115	0.03629	8.99933e-06	7738	TRUE	reported	textfile	0.00254108	19.7079	20.6438
	rs297276	T	G	T	G	0.0740137	-0.00787053	0.364924	0.63903	FALSE	FALSE	FALSE	27645542	0.748874	0.0245858	reported	textfile	4	27647164	0.0167416	9.8272e-06	7738	TRUE	reported	textfile	0.00251945	19.5397	20.6438
	rs3103910	A	G	A	G	0.0762922	-0.0313674	0.663608	0.441535	FALSE	FALSE	FALSE	92031142	0.187904	0.0238209	reported	textfile	6	92740860	0.0172215	9.42085e-06	7738	TRUE	reported	textfile	0.00252982	19.6203	20.6438
	rs4072394	T	C	T	C	-0.0823973	0.0303737	0.681738	0.318122	FALSE	FALSE	FALSE	22633287	0.229449	0.0252739	reported	textfile	8	22490800	0.0174045	2.19862e-06	7738	TRUE	reported	textfile	0.00288814	22.4074	20.6438
	rs4530151	C	T	C	T	-0.0775274	-0.0115371	0.558291	0.419512	FALSE	FALSE	FALSE	77938571	0.631273	0.0240388	reported	textfile	16	77972468	0.0171934	6.50924e-06	7738	TRUE	reported	textfile	0.00262071	20.3271	20.6438
	rs4759294	C	G	C	G	-0.0764665	-0.00688496	0.421776	0.46173	FALSE	TRUE	TRUE	53758843	0.77161	0.0237192	reported	textfile	12	54152627	0.0165573	3.86901e-06	7738	TRUE	reported	textfile	0.00274878	21.3231	20.6438
	rs4872524	C	T	C	T	-0.0797307	0.0312626	0.683601	0.318259	FALSE	FALSE	FALSE	22632024	0.216182	0.0252781	reported	textfile	8	22489537	0.0174272	4.76025e-06	7738	TRUE	reported	textfile	0.0026977	20.9259	20.6438
	rs56963659	T	C	T	C	0.123668	-0.0058324	0.0944416	0.90606	FALSE	FALSE	FALSE	133483072	0.885335	0.0404439	reported	textfile	9	136348194	0.0279319	9.53345e-06	7738	TRUE	reported	textfile	0.00252689	19.5975	20.6438
	rs60985876	T	C	T	C	-0.160949	-0.0544193	0.0533182	0.968379	FALSE	FALSE	FALSE	155314142	0.414672	0.0667149	reported	textfile	3	155031931	0.0363196	9.36009e-06	7738	TRUE	reported	textfile	0.00253142	19.6328	20.6438
	rs61295363	A	T	A	T	0.156802	0.00688009	0.0652665	0.0451509	FALSE	TRUE	FALSE	89917391	0.902464	0.0561412	reported	textfile	1	90382950	0.0329529	1.95173e-06	7738	TRUE	reported	textfile	0.00291755	22.6362	20.6438
	rs6558172	A	G	A	G	-0.0842737	0.0305117	0.683302	0.317644	FALSE	FALSE	FALSE	22634539	0.227617	0.025289	reported	textfile	8	22492052	0.0174467	1.36301e-06	7738	TRUE	reported	textfile	0.00300622	23.3263	20.6438
	rs6558174	G	A	G	A	-0.0828666	0.0266323	0.690953	0.312959	FALSE	FALSE	FALSE	22634616	0.294574	0.0254091	reported	textfile	8	22492129	0.017649	2.66281e-06	7738	TRUE	reported	textfile	0.00284089	22.0397	20.6438
	rs7206354	C	A	C	A	0.0784659	-0.0447373	0.343727	0.687824	FALSE	FALSE	FALSE	54696952	0.0777911	0.0253664	reported	textfile	16	54730864	0.0174082	6.56236e-06	7738	TRUE	reported	textfile	0.00261871	20.3115	20.6438
	rs72716346	A	G	A	G	0.152907	-0.00581702	0.0660499	0.955012	FALSE	FALSE	FALSE	89908524	0.917651	0.0562615	reported	textfile	1	90374083	0.0323631	2.30441e-06	7738	TRUE	reported	textfile	0.00287657	22.3173	20.6438
	rs73007810	C	G	C	G	-0.160597	0.0609562	0.054665	0.034841	FALSE	TRUE	FALSE	155311508	0.339869	0.063867	reported	textfile	3	155029297	0.0362805	9.57569e-06	7738	TRUE	reported	textfile	0.00252581	19.5892	20.6438
	rs73007812	A	G	A	G	-0.159105	-0.0619046	0.0547251	0.96526	FALSE	FALSE	FALSE	155315445	0.333248	0.063978	reported	textfile	3	155033234	0.0359738	9.74361e-06	7738	TRUE	reported	textfile	0.00252156	19.5561	20.6438
	rs7501412	T	C	T	C	0.0793122	-0.0381534	0.337065	0.716467	FALSE	FALSE	FALSE	54705909	0.145077	0.0261837	reported	textfile	16	54739821	0.0177264	7.66796e-06	7738	TRUE	reported	textfile	0.00258041	20.0137	20.6438
	rs75286179	C	G	C	G	-0.160489	0.0529311	0.0539618	0.0316353	FALSE	TRUE	FALSE	155322155	0.426743	0.0665986	reported	textfile	3	155039944	0.0362627	9.6117e-06	7738	TRUE	reported	textfile	0.0025249	19.582	20.6438
	rs75343544	T	C	T	C	-0.154824	0.00503684	0.0568539	0.868449	FALSE	FALSE	FALSE	52230810	0.884061	0.0345406	reported	textfile	17	50308170	0.0350454	9.9708e-06	7738	TRUE	reported	textfile	0.00251589	19.512	20.6438
	rs76094143	T	C	T	C	-0.154824	0.00503762	0.0568539	0.868582	FALSE	FALSE	FALSE	52236384	0.884141	0.0345702	reported	textfile	17	50313744	0.0350454	9.9708e-06	7738	TRUE	reported	textfile	0.00251589	19.512	20.6438
	rs76313121	A	T	A	T	-0.154824	-0.00499871	0.0568539	0.13155	FALSE	TRUE	FALSE	52235792	0.884934	0.0345411	reported	textfile	17	50313152	0.0350454	9.9708e-06	7738	TRUE	reported	textfile	0.00251589	19.512	20.6438
	rs7831119	G	A	G	A	-0.0797772	0.0296726	0.683643	0.317961	FALSE	FALSE	FALSE	22632165	0.24056	0.0252837	reported	textfile	8	22489678	0.0174299	4.71618e-06	7738	TRUE	reported	textfile	0.00270001	20.9438	20.6438
	rs78694885	G	A	G	A	-0.16365	-0.0542719	0.0533966	0.968381	FALSE	FALSE	FALSE	155313337	0.416074	0.0667344	reported	textfile	3	155031126	0.0366034	7.78951e-06	7738	TRUE	reported	textfile	0.00257656	19.9837	20.6438
	rs79135558	A	G	A	G	0.152747	-0.00645488	0.0660791	0.954828	FALSE	FALSE	FALSE	89911426	0.908428	0.0561191	reported	textfile	1	90376985	0.0323593	2.3544e-06	7738	TRUE	reported	textfile	0.00287124	22.2759	20.6438
	rs8044591	A	C	A	C	0.0781903	-0.0379847	0.341662	0.714224	FALSE	FALSE	FALSE	54700595	0.145179	0.0260745	reported	textfile	16	54734507	0.0175769	8.64888e-06	7738	TRUE	reported	textfile	0.00255084	19.7838	20.6438
	rs8050418	C	T	C	T	0.0777493	-0.0285623	0.342833	0.687966	FALSE	FALSE	FALSE	54701033	0.262396	0.0254851	reported	textfile	16	54734945	0.0175955	9.9291e-06	7738	TRUE	reported	textfile	0.0025169	19.5199	20.6438
GCST90027477	rs10051069	C	G	C	G	0.172761	0.0202603	0.176437	0.274379	FALSE	TRUE	FALSE	168289671	0.444499	0.0264972	reported	textfile	5	167716676	0.0373452	3.72675e-06	7738	TRUE	reported	textfile	0.002758	21.3949	20.7452
	rs10166293	A	G	A	G	0.130987	-0.00355151	0.451165	0.505504	FALSE	FALSE	FALSE	51777872	0.880344	0.0235928	reported	textfile	2	52005010	0.02854	4.44109e-06	7738	TRUE	reported	textfile	0.00271481	21.0589	20.7452
	rs10185173	C	T	C	T	0.129921	-0.00564426	0.451876	0.503714	FALSE	FALSE	FALSE	51779698	0.810751	0.023571	reported	textfile	2	52006836	0.0285569	5.3765e-06	7738	TRUE	reported	textfile	0.00266777	20.693	20.7452
	rs10475874	G	T	G	T	0.170866	-0.0198487	0.176317	0.725558	FALSE	FALSE	FALSE	168290729	0.453548	0.0264821	reported	textfile	5	167717734	0.0373673	4.81682e-06	7738	TRUE	reported	textfile	0.0026948	20.9033	20.7452
	rs111593827	G	A	G	A	0.173897	0.0022643	0.157032	0.776138	FALSE	FALSE	FALSE	168326497	0.936271	0.028319	reported	textfile	5	167753502	0.0389371	7.96599e-06	7738	TRUE	reported	textfile	0.00257105	19.9409	20.7452
	rs112166173	T	C	T	C	0.174349	0.00218426	0.157113	0.776267	FALSE	FALSE	FALSE	168326607	0.938528	0.028323	reported	textfile	5	167753612	0.0389432	7.5699e-06	7738	TRUE	reported	textfile	0.00258359	20.0384	20.7452
	rs114567914	G	A	G	A	-0.282964	0.0151524	0.0532257	0.951922	FALSE	FALSE	FALSE	89230941	0.790451	0.0570227	reported	textfile	1	89696624	0.063468	8.25867e-06	7738	TRUE	reported	textfile	0.00256218	19.8719	20.7452
	rs11487918	A	G	A	G	0.143522	-0.038288	0.277723	0.776936	FALSE	FALSE	FALSE	86047682	0.174992	0.028229	reported	textfile	1	86513365	0.0318561	6.6272e-06	7738	TRUE	reported	textfile	0.00261629	20.2927	20.7452
	rs11686436	T	C	T	C	0.130051	-0.00881789	0.451144	0.490834	FALSE	FALSE	FALSE	51790626	0.708996	0.0236275	reported	textfile	2	52017764	0.0285726	5.32415e-06	7738	TRUE	reported	textfile	0.00267016	20.7117	20.7452
	rs11751408	G	A	G	A	-0.147515	0.0328242	0.249669	0.72234	FALSE	FALSE	FALSE	15815963	0.212369	0.0263209	reported	textfile	6	15816194	0.0322084	4.64911e-06	7738	TRUE	reported	textfile	0.00270352	20.9711	20.7452
	rs11954736	C	T	C	T	0.180045	0.0031138	0.158978	0.77598	FALSE	FALSE	FALSE	168333725	0.912512	0.0283406	reported	textfile	5	167760730	0.0386552	3.1975e-06	7738	TRUE	reported	textfile	0.00279577	21.6887	20.7452
	rs12108717	A	G	A	G	0.170337	-0.0198523	0.176196	0.725559	FALSE	FALSE	FALSE	168290158	0.453478	0.0264827	reported	textfile	5	167717163	0.0373645	5.14494e-06	7738	TRUE	reported	textfile	0.00267859	20.7772	20.7452
	rs12514628	G	A	G	A	0.181396	-0.0114728	0.172933	0.737205	FALSE	FALSE	FALSE	168309006	0.669063	0.026841	reported	textfile	5	167736011	0.0370872	1.00284e-06	7738	TRUE	reported	textfile	0.00308204	23.9164	20.7452
	rs12517127	G	C	G	C	0.17066	0.020269	0.176496	0.275417	FALSE	TRUE	FALSE	168299937	0.443496	0.0264504	reported	textfile	5	167726942	0.0373322	4.84518e-06	7738	TRUE	reported	textfile	0.00269337	20.8922	20.7452
	rs12519918	C	G	C	G	0.181433	0.0118753	0.173186	0.263114	FALSE	TRUE	FALSE	168309261	0.657961	0.0268229	reported	textfile	5	167736266	0.0370317	9.61302e-07	7738	TRUE	reported	textfile	0.00309251	23.9979	20.7452
	rs12522231	G	A	G	A	0.170699	-0.0198889	0.176506	0.725	FALSE	FALSE	FALSE	168300068	0.452189	0.0264561	reported	textfile	5	167727073	0.0373331	4.82347e-06	7738	TRUE	reported	textfile	0.00269447	20.9007	20.7452
	rs13216265	T	C	T	C	-0.145702	0.0330973	0.2499	0.722277	FALSE	FALSE	FALSE	15817647	0.208741	0.0263297	reported	textfile	6	15817878	0.0320774	5.56724e-06	7738	TRUE	reported	textfile	0.00265918	20.6263	20.7452
	rs13394332	A	G	A	G	0.128948	-0.00597511	0.451344	0.503886	FALSE	FALSE	FALSE	51780291	0.799913	0.0235742	reported	textfile	2	52007429	0.0285459	6.26628e-06	7738	TRUE	reported	textfile	0.00263008	20.4	20.7452
	rs13404286	C	A	C	A	0.13184	0.00607412	0.625866	0.381776	FALSE	FALSE	FALSE	51755159	0.80255	0.0242918	reported	textfile	2	51982297	0.0290302	5.58637e-06	7738	TRUE	reported	textfile	0.00265833	20.6197	20.7452
	rs1408666	T	C	T	C	0.141365	-0.0386985	0.278146	0.77703	FALSE	FALSE	FALSE	86036723	0.170485	0.0282338	reported	textfile	1	86502406	0.0319069	9.39875e-06	7738	TRUE	reported	textfile	0.00253038	19.6247	20.7452
	rs17051843	G	A	G	A	0.168249	-0.0137939	0.187173	0.729279	FALSE	FALSE	FALSE	168317645	0.604913	0.0266628	reported	textfile	5	167744650	0.03679	4.80275e-06	7738	TRUE	reported	textfile	0.00269553	20.909	20.7452
	rs17070081	G	A	G	A	0.174681	0.00433721	0.158023	0.776065	FALSE	FALSE	FALSE	168331163	0.878198	0.0283007	reported	textfile	5	167758168	0.038665	6.2487e-06	7738	TRUE	reported	textfile	0.00263077	20.4053	20.7452
	rs17477477	T	A	T	A	-0.147359	-0.0325841	0.249519	0.277568	FALSE	TRUE	FALSE	15817216	0.215928	0.0263321	reported	textfile	6	15817447	0.0322112	4.76738e-06	7738	TRUE	reported	textfile	0.00269735	20.9232	20.7452
	rs17632741	G	A	G	A	0.183107	-0.0137537	0.172263	0.739299	FALSE	FALSE	FALSE	168316904	0.609607	0.0269345	reported	textfile	5	167743909	0.0372466	8.82999e-07	7738	TRUE	reported	textfile	0.00311353	24.1615	20.7452
	rs17632785	C	A	C	A	0.174371	0.00318775	0.157583	0.776127	FALSE	FALSE	FALSE	168330561	0.910339	0.0283075	reported	textfile	5	167757566	0.0387834	6.92373e-06	7738	TRUE	reported	textfile	0.00260552	20.209	20.7452
	rs2337213	T	C	T	C	0.174362	0.00430679	0.157524	0.77577	FALSE	FALSE	FALSE	168329025	0.878972	0.0282833	reported	textfile	5	167756030	0.0387902	6.95713e-06	7738	TRUE	reported	textfile	0.00260434	20.1998	20.7452
	rs2337214	A	G	A	G	0.177095	0.00311019	0.158317	0.776133	FALSE	FALSE	FALSE	168328981	0.912514	0.0283083	reported	textfile	5	167755986	0.0386116	4.50547e-06	7738	TRUE	reported	textfile	0.00271125	21.0312	20.7452
	rs2514582	A	G	A	G	0.132297	-0.0153497	0.63262	0.274764	FALSE	FALSE	FALSE	118584138	0.561	0.0264033	reported	textfile	8	119596377	0.0297526	8.7259e-06	7738	TRUE	reported	textfile	0.00254867	19.7669	20.7452
	rs2514587	A	G	A	G	0.133181	-0.0109747	0.629148	0.277995	FALSE	FALSE	FALSE	118587453	0.676226	0.0262794	reported	textfile	8	119599692	0.0298082	7.89787e-06	7738	TRUE	reported	textfile	0.00257315	19.9573	20.7452
	rs28421306	A	T	A	T	-0.193063	0.010738	0.129282	0.123508	FALSE	TRUE	FALSE	29679182	0.765401	0.0359855	reported	textfile	19	30170089	0.0420431	4.38985e-06	7738	TRUE	reported	textfile	0.00271768	21.0813	20.7452
	rs28556747	A	C	A	C	-0.191056	-0.00204321	0.128502	0.881358	FALSE	FALSE	FALSE	29679042	0.95549	0.0366074	reported	textfile	19	30169949	0.0422105	6.00371e-06	7738	TRUE	reported	textfile	0.0026406	20.4818	20.7452
	rs34317346	A	G	A	G	0.285613	0.0228859	0.0582946	0.947605	FALSE	FALSE	FALSE	28477520	0.660534	0.0521111	reported	textfile	12	28630453	0.062907	5.61914e-06	7738	TRUE	reported	textfile	0.00265689	20.6085	20.7452
	rs3781339	T	C	T	C	0.166232	-0.00957443	0.187134	0.757994	FALSE	FALSE	FALSE	103668394	0.728798	0.0276138	reported	textfile	10	105428152	0.0362705	4.5811e-06	7738	TRUE	reported	textfile	0.00270717	20.9995	20.7452
	rs4332610	A	G	A	G	-0.124159	-0.0184155	0.514629	0.478127	FALSE	FALSE	FALSE	70887069	0.433958	0.0235361	reported	textfile	12	71280849	0.027764	7.75104e-06	7738	TRUE	reported	textfile	0.00257776	19.9931	20.7452
	rs4449559	T	G	T	G	0.176674	0.0031021	0.158137	0.776172	FALSE	FALSE	FALSE	168329234	0.912748	0.0283106	reported	textfile	5	167756239	0.0386558	4.86721e-06	7738	TRUE	reported	textfile	0.00269226	20.8835	20.7452
	rs485816	G	A	G	A	0.139809	-0.0432319	0.286888	0.769281	FALSE	FALSE	FALSE	86023343	0.121584	0.0279248	reported	textfile	1	86489026	0.0315054	9.09599e-06	7738	TRUE	reported	textfile	0.00253844	19.6874	20.7452
	rs59073043	T	G	T	G	-0.193129	-0.00674825	0.129322	0.876516	FALSE	FALSE	FALSE	29680186	0.851318	0.0360028	reported	textfile	19	30171093	0.0420448	4.36064e-06	7738	TRUE	reported	textfile	0.00271931	21.094	20.7452
	rs59336768	A	G	A	G	-0.193839	-0.00863548	0.129332	0.876642	FALSE	FALSE	FALSE	29679877	0.810494	0.0360129	reported	textfile	19	30170784	0.0420538	4.04017e-06	7738	TRUE	reported	textfile	0.00273812	21.2402	20.7452
	rs61800725	G	A	G	A	0.142296	-0.040223	0.278247	0.771384	FALSE	FALSE	FALSE	86036998	0.151304	0.0280311	reported	textfile	1	86502681	0.0319185	8.26894e-06	7738	TRUE	reported	textfile	0.00256187	19.8696	20.7452
	rs61800726	C	T	C	T	0.141787	-0.0402196	0.278146	0.771383	FALSE	FALSE	FALSE	86037862	0.151338	0.028031	reported	textfile	1	86503545	0.0319068	8.83914e-06	7738	TRUE	reported	textfile	0.00254549	19.7421	20.7452
	rs61800728	A	T	A	T	0.143466	0.0382913	0.277763	0.223062	FALSE	TRUE	FALSE	86047582	0.17496	0.0282293	reported	textfile	1	86513265	0.0318594	6.6973e-06	7738	TRUE	reported	textfile	0.00261371	20.2727	20.7452
	rs61802172	A	G	A	G	0.18177	-0.00391787	0.149788	0.84613	FALSE	FALSE	FALSE	86082986	0.90425	0.0325689	reported	textfile	1	86548669	0.0400524	5.67061e-06	7738	TRUE	reported	textfile	0.00265463	20.5909	20.7452
	rs61861701	G	A	G	A	0.159157	-0.00628907	0.257808	0.814491	FALSE	FALSE	FALSE	110605246	0.837826	0.030727	reported	textfile	10	112365004	0.0335114	2.04089e-06	7738	TRUE	reported	textfile	0.00290652	22.5504	20.7452
	rs62385620	A	T	A	T	0.218956	0.0228954	0.118359	0.145691	FALSE	TRUE	FALSE	168336946	0.504374	0.0342939	reported	textfile	5	167763951	0.0467115	2.76675e-06	7738	TRUE	reported	textfile	0.00283143	21.9661	20.7452
	rs62394862	C	A	C	A	-0.147977	0.0318627	0.249238	0.72318	FALSE	FALSE	FALSE	15816910	0.226864	0.026366	reported	textfile	6	15817141	0.0322854	4.57436e-06	7738	TRUE	reported	textfile	0.00270751	21.0022	20.7452
	rs641712	A	G	A	G	0.13985	-0.0428341	0.286898	0.769288	FALSE	FALSE	FALSE	86022549	0.125086	0.0279273	reported	textfile	1	86488232	0.0315048	9.03691e-06	7738	TRUE	reported	textfile	0.00254003	19.6997	20.7452
	rs657540	T	G	T	G	0.13948	-0.0416545	0.286728	0.774926	FALSE	FALSE	FALSE	86023810	0.138574	0.0281236	reported	textfile	1	86489493	0.0315068	9.55675e-06	7738	TRUE	reported	textfile	0.00252632	19.5931	20.7452
	rs658313	T	C	T	C	0.139685	-0.0416545	0.286799	0.774926	FALSE	FALSE	FALSE	86023942	0.138574	0.0281236	reported	textfile	1	86489625	0.0315024	9.24464e-06	7738	TRUE	reported	textfile	0.00253444	19.6562	20.7452
	rs6674872	T	C	T	C	0.143817	-0.0384235	0.277854	0.776612	FALSE	FALSE	FALSE	86047611	0.173346	0.0282208	reported	textfile	1	86513294	0.0318602	6.36121e-06	7738	TRUE	reported	textfile	0.00262635	20.3709	20.7452
	rs6691400	T	C	T	C	0.139875	-0.0444324	0.28691	0.7693	FALSE	FALSE	FALSE	86021806	0.111662	0.0279315	reported	textfile	1	86487489	0.0314937	8.93943e-06	7738	TRUE	reported	textfile	0.00254272	19.7206	20.7452
	rs7249461	G	A	G	A	-0.196695	-0.00394822	0.120995	0.891212	FALSE	FALSE	FALSE	29682115	0.917606	0.0381656	reported	textfile	19	30173022	0.0431924	5.26514e-06	7738	TRUE	reported	textfile	0.00267289	20.7329	20.7452
	rs72822615	T	C	T	C	0.183866	-0.0116042	0.172729	0.736705	FALSE	FALSE	FALSE	168315378	0.665264	0.0268207	reported	textfile	5	167742383	0.0372448	7.94548e-07	7738	TRUE	reported	textfile	0.00313962	24.3646	20.7452
	rs72822616	G	C	G	C	0.174795	0.000524301	0.157082	0.221362	FALSE	TRUE	FALSE	168319748	0.985285	0.0284269	reported	textfile	5	167746753	0.0389402	7.16209e-06	7738	TRUE	reported	textfile	0.00259719	20.1442	20.7452
	rs72822619	T	C	T	C	0.174754	-0.000323806	0.157092	0.778655	FALSE	FALSE	FALSE	168321512	0.990912	0.0284284	reported	textfile	5	167748517	0.0389382	7.19018e-06	7738	TRUE	reported	textfile	0.00259624	20.1368	20.7452
	rs72822620	A	G	A	G	0.174744	-0.000190831	0.157253	0.77866	FALSE	FALSE	FALSE	168322438	0.994643	0.0284232	reported	textfile	5	167749443	0.0389085	7.08419e-06	7738	TRUE	reported	textfile	0.0025999	20.1652	20.7452
	rs72822623	A	G	A	G	0.174797	-0.00015474	0.157264	0.778643	FALSE	FALSE	FALSE	168323710	0.995656	0.0284201	reported	textfile	5	167750715	0.0389064	7.03089e-06	7738	TRUE	reported	textfile	0.00260175	20.1796	20.7452
	rs72822626	T	G	T	G	0.174168	0.00314859	0.157532	0.776018	FALSE	FALSE	FALSE	168331032	0.91143	0.0283058	reported	textfile	5	167758037	0.0387899	7.12148e-06	7738	TRUE	reported	textfile	0.00259861	20.1552	20.7452
	rs72822628	T	G	T	G	0.174168	0.00313588	0.157532	0.776158	FALSE	FALSE	FALSE	168331124	0.911788	0.0283063	reported	textfile	5	167758129	0.0387899	7.12148e-06	7738	TRUE	reported	textfile	0.00259861	20.1552	20.7452
	rs72822629	A	G	A	G	0.174331	0.00216217	0.157442	0.776235	FALSE	FALSE	FALSE	168331508	0.939137	0.0283175	reported	textfile	5	167758513	0.0388068	7.04644e-06	7738	TRUE	reported	textfile	0.0026012	20.1754	20.7452
	rs72828862	A	G	A	G	0.174331	0.00242972	0.157442	0.776151	FALSE	FALSE	FALSE	168331513	0.931596	0.0283064	reported	textfile	5	167758518	0.0388068	7.04644e-06	7738	TRUE	reported	textfile	0.0026012	20.1754	20.7452
	rs72828867	T	A	T	A	0.175683	-0.00258609	0.157603	0.22386	FALSE	TRUE	FALSE	168333029	0.927277	0.0283339	reported	textfile	5	167760034	0.0387689	5.85504e-06	7738	TRUE	reported	textfile	0.00264675	20.5296	20.7452
	rs72828869	A	G	A	G	0.182285	0.00336649	0.157543	0.775973	FALSE	FALSE	FALSE	168334321	0.905608	0.02839	reported	textfile	5	167761326	0.0395201	3.97924e-06	7738	TRUE	reported	textfile	0.00274186	21.2693	20.7452
	rs72838320	A	G	A	G	0.170566	-0.0198602	0.176136	0.725551	FALSE	FALSE	FALSE	168292740	0.453226	0.0264787	reported	textfile	5	167719745	0.0373624	4.99045e-06	7738	TRUE	reported	textfile	0.00268608	20.8355	20.7452
	rs72838323	T	C	T	C	0.170566	-0.0198353	0.176136	0.725534	FALSE	FALSE	FALSE	168292765	0.453792	0.0264786	reported	textfile	5	167719770	0.0373624	4.99045e-06	7738	TRUE	reported	textfile	0.00268608	20.8355	20.7452
	rs72838333	A	G	A	G	0.171024	-0.0204123	0.176596	0.725624	FALSE	FALSE	FALSE	168300909	0.440561	0.0264666	reported	textfile	5	167727914	0.0373192	4.58934e-06	7738	TRUE	reported	textfile	0.00270672	20.996	20.7452
	rs72838335	G	A	G	A	0.170286	-0.0201903	0.176354	0.726498	FALSE	FALSE	FALSE	168302377	0.446076	0.0264973	reported	textfile	5	167729382	0.0373225	5.05347e-06	7738	TRUE	reported	textfile	0.002683	20.8115	20.7452
	rs728668	A	G	A	G	0.174806	-0.000205015	0.157113	0.778642	FALSE	FALSE	FALSE	168322873	0.994244	0.0284209	reported	textfile	5	167749878	0.0389367	7.13904e-06	7738	TRUE	reported	textfile	0.00259798	20.1503	20.7452
	rs72943027	G	T	G	T	0.189798	-0.0231554	0.134399	0.855535	FALSE	FALSE	FALSE	105254277	0.495001	0.0339335	reported	textfile	2	105870734	0.0429028	9.69349e-06	7738	TRUE	reported	textfile	0.00252282	19.5659	20.7452
	rs73024197	A	C	A	C	-0.210026	-0.00928643	0.116768	0.892734	FALSE	FALSE	FALSE	29672107	0.80901	0.0384207	reported	textfile	19	30163014	0.0444604	2.31377e-06	7738	TRUE	reported	textfile	0.00287554	22.3094	20.7452
	rs73033913	A	G	A	G	-0.194952	-0.00849945	0.128253	0.876621	FALSE	FALSE	FALSE	29680983	0.813607	0.036049	reported	textfile	19	30171890	0.0422936	4.03673e-06	7738	TRUE	reported	textfile	0.00273833	21.2419	20.7452
	rs73083939	A	C	A	C	0.275533	0.0369254	0.0598326	0.895956	FALSE	FALSE	FALSE	28266140	0.339798	0.038683	reported	textfile	12	28419073	0.0607626	5.77165e-06	7738	TRUE	reported	textfile	0.00265029	20.5571	20.7452
	rs7552025	A	G	A	G	0.142749	-0.0386478	0.277304	0.777027	FALSE	FALSE	FALSE	86042716	0.171076	0.0282358	reported	textfile	1	86508399	0.0319249	7.7707e-06	7738	TRUE	reported	textfile	0.00257714	19.9883	20.7452
	rs7718390	T	C	T	C	0.170898	-0.0205393	0.176137	0.725595	FALSE	FALSE	FALSE	168293116	0.437862	0.0264747	reported	textfile	5	167720121	0.0373601	4.77705e-06	7738	TRUE	reported	textfile	0.00269685	20.9192	20.7452
	rs7721532	G	C	G	C	0.170697	0.0197773	0.176496	0.274976	FALSE	TRUE	FALSE	168298703	0.45476	0.0264577	reported	textfile	5	167725708	0.0373335	4.82592e-06	7738	TRUE	reported	textfile	0.00269435	20.8998	20.7452
	rs7776094	A	C	A	C	-0.242195	0.13159	0.0742795	0.973106	FALSE	FALSE	FALSE	82902197	0.0718224	0.0730958	reported	textfile	6	83611916	0.0536335	6.30957e-06	7738	TRUE	reported	textfile	0.00262837	20.3866	20.7452
	rs7977031	T	C	T	C	-0.124425	-0.0204241	0.519057	0.470798	FALSE	FALSE	FALSE	70876990	0.38628	0.023574	reported	textfile	12	71270770	0.0278744	8.05323e-06	7738	TRUE	reported	textfile	0.00256838	19.9201	20.7452
	rs8099974	C	A	C	A	-0.195806	-0.0133186	0.133044	0.875458	FALSE	FALSE	FALSE	29681377	0.710341	0.0358609	reported	textfile	19	30172284	0.0419379	3.02761e-06	7738	TRUE	reported	textfile	0.00280924	21.7935	20.7452
GCST90027478	rs10445320	G	A	G	A	-0.110181	-0.0367319	0.347125	0.61683	FALSE	FALSE	FALSE	43102157	0.130473	0.0242898	reported	textfile	17	41254174	0.0233944	2.48033e-06	7738	TRUE	reported	textfile	0.00285837	22.1757	21.8279
	rs1060915	G	A	G	A	-0.112047	-0.0370137	0.347046	0.616927	FALSE	FALSE	FALSE	43082453	0.127498	0.0242865	reported	textfile	17	41234470	0.02337	1.63087e-06	7738	TRUE	reported	textfile	0.00296187	22.9811	21.8279
	rs10814610	T	C	T	C	-0.164834	-0.0625049	0.151425	0.843106	FALSE	FALSE	FALSE	3781877	0.0547192	0.032536	reported	textfile	9	3781877	0.033329	7.5891e-07	7738	TRUE	reported	textfile	0.00315101	24.4533	21.8279
	rs10973565	G	A	G	A	-0.137591	-0.0363379	0.212995	0.797422	FALSE	FALSE	FALSE	3790103	0.216204	0.0293833	reported	textfile	9	3790103	0.0291392	2.33717e-06	7738	TRUE	reported	textfile	0.00287307	22.2901	21.8279
	rs11079056	A	C	A	C	-0.110178	-0.037533	0.347388	0.616646	FALSE	FALSE	FALSE	43148782	0.122287	0.0242893	reported	textfile	17	41300799	0.0233911	2.474e-06	7738	TRUE	reported	textfile	0.00285901	22.1807	21.8279
	rs11080034	C	T	C	T	-0.108694	-0.0393873	0.352548	0.611928	FALSE	FALSE	FALSE	43365646	0.105892	0.0243592	reported	textfile	17	41443014	0.0232934	3.06634e-06	7738	TRUE	reported	textfile	0.00280606	21.7687	21.8279
	rs111241581	C	T	C	T	-0.106146	-0.0374527	0.351756	0.616007	FALSE	FALSE	FALSE	43310090	0.124782	0.0243991	reported	textfile	17	41387445	0.0232609	5.03582e-06	7738	TRUE	reported	textfile	0.00268385	20.8181	21.8279
	rs111499627	C	G	C	G	-0.113333	0.0370151	0.346134	0.383203	FALSE	TRUE	FALSE	43072816	0.127546	0.0242905	reported	textfile	17	41224833	0.0233744	1.24345e-06	7738	TRUE	reported	textfile	0.00302891	23.5028	21.8279
	rs111535713	G	T	G	T	-0.10844	-0.0376161	0.350475	0.616029	FALSE	FALSE	FALSE	43324365	0.12315	0.0243993	reported	textfile	17	41401733	0.0233376	3.37497e-06	7738	TRUE	reported	textfile	0.00278245	21.5851	21.8279
	rs11171850	C	T	C	T	0.0981023	0.0432249	0.588529	0.431602	FALSE	FALSE	FALSE	56437321	0.0696322	0.0238247	reported	textfile	12	56831105	0.0220241	8.41608e-06	7738	TRUE	reported	textfile	0.00255753	19.8358	21.8279
	rs111784069	A	G	A	G	-0.108407	-0.0377449	0.350438	0.616272	FALSE	FALSE	FALSE	43324362	0.121879	0.0243998	reported	textfile	17	41401730	0.0233397	3.4051e-06	7738	TRUE	reported	textfile	0.00278027	21.5681	21.8279
	rs1133320	G	A	G	A	-0.107443	-0.0363762	0.35088	0.61649	FALSE	FALSE	FALSE	43223574	0.134379	0.0242985	reported	textfile	17	41375597	0.023332	4.12544e-06	7738	TRUE	reported	textfile	0.00273297	21.2002	21.8279
	rs113379364	A	G	A	G	-0.106022	-0.0375577	0.351714	0.615952	FALSE	FALSE	FALSE	43310516	0.123754	0.0244007	reported	textfile	17	41387871	0.0232628	5.17476e-06	7738	TRUE	reported	textfile	0.00267716	20.7661	21.8279
	rs113429486	A	T	A	T	-0.10641	0.0375856	0.35166	0.383992	FALSE	TRUE	FALSE	43318225	0.123461	0.0243998	reported	textfile	17	41395592	0.0232711	4.81648e-06	7738	TRUE	reported	textfile	0.00269482	20.9035	21.8279
	rs1135214	C	T	C	T	-0.110092	-0.037477	0.347327	0.616649	FALSE	FALSE	FALSE	43140306	0.122843	0.0242892	reported	textfile	17	41292323	0.0233942	2.52662e-06	7738	TRUE	reported	textfile	0.00285381	22.1403	21.8279
	rs113613557	C	T	C	T	-0.106193	-0.0375297	0.351614	0.616016	FALSE	FALSE	FALSE	43316084	0.124014	0.0243994	reported	textfile	17	41393440	0.0232724	5.0415e-06	7738	TRUE	reported	textfile	0.00268357	20.816	21.8279
	rs11649926	G	T	G	T	-0.109471	-0.037636	0.347541	0.616794	FALSE	FALSE	FALSE	43149411	0.12139	0.0242975	reported	textfile	17	41301428	0.0233816	2.84171e-06	7738	TRUE	reported	textfile	0.00282483	21.9148	21.8279
	rs11649954	G	A	G	A	-0.108164	-0.0376192	0.350821	0.61601	FALSE	FALSE	FALSE	43342667	0.123092	0.0243976	reported	textfile	17	41420035	0.0233272	3.53834e-06	7738	TRUE	reported	textfile	0.00277081	21.4945	21.8279
	rs11650013	G	A	G	A	-0.113228	-0.0370642	0.346823	0.616705	FALSE	FALSE	FALSE	43037028	0.127059	0.0242916	reported	textfile	17	41189045	0.0235047	1.45536e-06	7738	TRUE	reported	textfile	0.00298999	23.1999	21.8279
	rs11650132	G	T	G	T	-0.107952	-0.0350941	0.351414	0.615985	FALSE	FALSE	FALSE	43174070	0.148406	0.0242834	reported	textfile	17	41326087	0.0233518	3.78512e-06	7738	TRUE	reported	textfile	0.00275419	21.3653	21.8279
	rs11650848	G	A	G	A	-0.110091	-0.037441	0.347345	0.616652	FALSE	FALSE	FALSE	43132682	0.123204	0.0242892	reported	textfile	17	41284699	0.0233953	2.53029e-06	7738	TRUE	reported	textfile	0.00285349	22.1378	21.8279
	rs11650913	C	T	C	T	-0.107109	-0.0360231	0.350869	0.61609	FALSE	FALSE	FALSE	43179580	0.137892	0.0242795	reported	textfile	17	41331597	0.0233362	4.43598e-06	7738	TRUE	reported	textfile	0.00271508	21.061	21.8279
	rs11651341	C	T	C	T	-0.108231	-0.0377976	0.350833	0.616235	FALSE	FALSE	FALSE	43350693	0.121335	0.0243982	reported	textfile	17	41428061	0.0233262	3.4857e-06	7738	TRUE	reported	textfile	0.00277447	21.523	21.8279
	rs11651623	A	G	A	G	-0.107209	-0.0354857	0.350803	0.616109	FALSE	FALSE	FALSE	43177830	0.143877	0.0242803	reported	textfile	17	41329847	0.0233441	4.37855e-06	7738	TRUE	reported	textfile	0.0027183	21.0861	21.8279
	rs11651905	A	T	A	T	-0.109771	0.0453119	0.347643	0.393662	FALSE	TRUE	FALSE	43132775	0.0610604	0.0241914	reported	textfile	17	41284792	0.0233984	2.71369e-06	7738	TRUE	reported	textfile	0.00283623	22.0034	21.8279
	rs11652332	A	G	A	G	-0.110051	-0.0374931	0.347339	0.616635	FALSE	FALSE	FALSE	43143472	0.122692	0.0242898	reported	textfile	17	41295489	0.0233932	2.54613e-06	7738	TRUE	reported	textfile	0.00285194	22.1257	21.8279
	rs11652377	T	C	T	C	-0.113067	-0.0367452	0.347021	0.616617	FALSE	FALSE	FALSE	43060152	0.130421	0.0242952	reported	textfile	17	41212169	0.0233698	1.31042e-06	7738	TRUE	reported	textfile	0.00301593	23.4018	21.8279
	rs11653069	T	C	T	C	-0.110224	-0.0374362	0.347382	0.616652	FALSE	FALSE	FALSE	43131360	0.123251	0.0242892	reported	textfile	17	41283377	0.0233938	2.45657e-06	7738	TRUE	reported	textfile	0.00286074	22.1942	21.8279
	rs11653231	A	G	A	G	-0.107295	-0.0360304	0.350864	0.616078	FALSE	FALSE	FALSE	43179443	0.137815	0.0242796	reported	textfile	17	41331460	0.023341	4.28914e-06	7738	TRUE	reported	textfile	0.00272337	21.1255	21.8279
	rs11653253	A	G	A	G	-0.115401	-0.0382627	0.345777	0.618043	FALSE	FALSE	FALSE	43030645	0.115662	0.0243209	reported	textfile	17	41182662	0.0234944	9.02256e-07	7738	TRUE	reported	textfile	0.00310821	24.12	21.8279
	rs11653303	T	G	T	G	-0.108161	-0.0376193	0.350724	0.61601	FALSE	FALSE	FALSE	43342775	0.123091	0.0243976	reported	textfile	17	41420143	0.0233336	3.5623e-06	7738	TRUE	reported	textfile	0.00276914	21.4816	21.8279
	rs11653460	T	C	T	C	-0.107213	-0.0360231	0.350803	0.61609	FALSE	FALSE	FALSE	43179289	0.137892	0.0242795	reported	textfile	17	41331306	0.0233447	4.37774e-06	7738	TRUE	reported	textfile	0.00271836	21.0866	21.8279
	rs11654051	T	C	T	C	-0.108142	-0.0376193	0.35073	0.61601	FALSE	FALSE	FALSE	43342288	0.123091	0.0243975	reported	textfile	17	41419656	0.0233323	3.57182e-06	7738	TRUE	reported	textfile	0.00276848	21.4764	21.8279
	rs11654452	T	G	T	G	-0.113591	-0.0370641	0.3469	0.616705	FALSE	FALSE	FALSE	43037366	0.12706	0.0242916	reported	textfile	17	41189383	0.0235043	1.34645e-06	7738	TRUE	reported	textfile	0.00300923	23.3497	21.8279
	rs11654700	A	G	A	G	-0.107244	-0.0360192	0.350786	0.616092	FALSE	FALSE	FALSE	43174881	0.137949	0.0242803	reported	textfile	17	41326898	0.0233434	4.3444e-06	7738	TRUE	reported	textfile	0.00272023	21.1011	21.8279
	rs11654731	A	G	A	G	-0.107244	-0.0360412	0.350786	0.61617	FALSE	FALSE	FALSE	43174923	0.137786	0.0242851	reported	textfile	17	41326940	0.0233434	4.3444e-06	7738	TRUE	reported	textfile	0.00272023	21.1011	21.8279
	rs11654877	G	A	G	A	-0.107206	-0.0355384	0.35102	0.616004	FALSE	FALSE	FALSE	43188672	0.143244	0.0242779	reported	textfile	17	41340689	0.0233381	4.35612e-06	7738	TRUE	reported	textfile	0.00271954	21.0957	21.8279
	rs11655049	C	T	C	T	-0.107308	-0.0360231	0.350936	0.61609	FALSE	FALSE	FALSE	43182908	0.137892	0.0242795	reported	textfile	17	41334925	0.0233353	4.2554e-06	7738	TRUE	reported	textfile	0.00272536	21.141	21.8279
	rs11655505	A	G	A	G	-0.110295	-0.037411	0.347388	0.616655	FALSE	FALSE	FALSE	43126360	0.123504	0.0242892	reported	textfile	17	41278377	0.0233918	2.41579e-06	7738	TRUE	reported	textfile	0.0028649	22.2266	21.8279
	rs11656632	T	C	T	C	-0.117478	-0.0461033	0.22432	0.717442	FALSE	FALSE	FALSE	43405469	0.0795024	0.026291	reported	textfile	17	41482837	0.0264757	9.11402e-06	7738	TRUE	reported	textfile	0.00253797	19.6837	21.8279
	rs11656945	G	A	G	A	-0.107209	-0.0360255	0.350803	0.61609	FALSE	FALSE	FALSE	43178248	0.137868	0.0242796	reported	textfile	17	41330265	0.0233441	4.37855e-06	7738	TRUE	reported	textfile	0.0027183	21.0861	21.8279
	rs11657004	G	A	G	A	-0.107777	-0.0391352	0.351988	0.61203	FALSE	FALSE	FALSE	43365383	0.108166	0.0243606	reported	textfile	17	41442751	0.0233071	3.76045e-06	7738	TRUE	reported	textfile	0.00275581	21.3778	21.8279
	rs11657053	T	G	T	G	-0.112041	-0.0372069	0.346273	0.616722	FALSE	FALSE	FALSE	43039112	0.125599	0.0242914	reported	textfile	17	41191129	0.0233707	1.63429e-06	7738	TRUE	reported	textfile	0.00296138	22.9773	21.8279
	rs11657823	A	G	A	G	-0.109781	-0.0362547	0.346838	0.617402	FALSE	FALSE	FALSE	43112129	0.135666	0.0242973	reported	textfile	17	41264146	0.0233968	2.70358e-06	7738	TRUE	reported	textfile	0.00283713	22.0105	21.8279
	rs11657835	G	C	G	C	-0.110092	0.0374774	0.347327	0.383351	FALSE	TRUE	FALSE	43139936	0.122839	0.0242892	reported	textfile	17	41291953	0.0233942	2.52662e-06	7738	TRUE	reported	textfile	0.00285381	22.1403	21.8279
	rs11657883	C	T	C	T	-0.107209	-0.0359769	0.350803	0.61612	FALSE	FALSE	FALSE	43178007	0.138421	0.0242809	reported	textfile	17	41330024	0.0233441	4.37855e-06	7738	TRUE	reported	textfile	0.0027183	21.0861	21.8279
	rs11658499	T	C	T	C	-0.10715	-0.0360231	0.350857	0.61609	FALSE	FALSE	FALSE	43182732	0.137892	0.0242795	reported	textfile	17	41334749	0.0233372	4.40301e-06	7738	TRUE	reported	textfile	0.00271692	21.0753	21.8279
	rs11658754	A	G	A	G	-0.110178	-0.037481	0.347388	0.616649	FALSE	FALSE	FALSE	43140722	0.122803	0.0242892	reported	textfile	17	41292739	0.0233911	2.474e-06	7738	TRUE	reported	textfile	0.00285901	22.1807	21.8279
	rs11659028	A	T	A	T	-0.111863	0.0369224	0.346748	0.383174	FALSE	TRUE	FALSE	43043008	0.128523	0.0242918	reported	textfile	17	41195025	0.0233734	1.70196e-06	7738	TRUE	reported	textfile	0.00295132	22.899	21.8279
	rs11703119	C	T	C	T	0.160433	0.0454122	0.136401	0.919279	FALSE	FALSE	FALSE	33377881	0.292229	0.0431166	reported	textfile	22	33773867	0.0326022	8.61331e-07	7738	TRUE	reported	textfile	0.00311966	24.2092	21.8279
	rs11703345	T	G	T	G	0.16	0.050869	0.136271	0.917757	FALSE	FALSE	FALSE	33374587	0.234693	0.0428062	reported	textfile	22	33770573	0.0325964	9.17698e-07	7738	TRUE	reported	textfile	0.003104	24.0873	21.8279
	rs11703347	A	G	A	G	0.16	0.0508603	0.136271	0.917759	FALSE	FALSE	FALSE	33374636	0.234773	0.0428062	reported	textfile	22	33770622	0.0325964	9.17698e-07	7738	TRUE	reported	textfile	0.003104	24.0873	21.8279
	rs11703454	A	G	A	G	0.160036	0.0453149	0.136554	0.919243	FALSE	FALSE	FALSE	33383448	0.293123	0.0431039	reported	textfile	22	33779434	0.0324754	8.31075e-07	7738	TRUE	reported	textfile	0.0031285	24.2781	21.8279
	rs11703588	C	T	C	T	0.16	0.0507158	0.136271	0.917788	FALSE	FALSE	FALSE	33375031	0.236264	0.0428206	reported	textfile	22	33771017	0.0325964	9.17698e-07	7738	TRUE	reported	textfile	0.003104	24.0873	21.8279
	rs11703802	C	T	C	T	0.162007	0.0211259	0.12133	0.931743	FALSE	FALSE	FALSE	33408524	0.652073	0.0468542	reported	textfile	22	33804510	0.0344122	2.50363e-06	7738	TRUE	reported	textfile	0.00285609	22.158	21.8279
	rs11705379	T	G	T	G	0.160314	0.0454038	0.136222	0.919278	FALSE	FALSE	FALSE	33380839	0.292316	0.0431163	reported	textfile	22	33776825	0.0326032	8.78193e-07	7738	TRUE	reported	textfile	0.00311486	24.1719	21.8279
	rs117983116	G	A	G	A	0.160433	0.0454027	0.136401	0.919278	FALSE	FALSE	FALSE	33379387	0.292328	0.0431164	reported	textfile	22	33775373	0.0326022	8.61331e-07	7738	TRUE	reported	textfile	0.00311966	24.2092	21.8279
	rs12193423	T	G	T	G	0.131836	-0.0528397	0.824765	0.218156	FALSE	FALSE	FALSE	43734509	0.0631364	0.0284356	reported	textfile	6	43702246	0.0289791	5.38183e-06	7738	TRUE	reported	textfile	0.00266753	20.6912	21.8279
	rs12299614	G	A	G	A	0.0977933	0.0431853	0.588314	0.431772	FALSE	FALSE	FALSE	56437398	0.0698876	0.0238246	reported	textfile	12	56831182	0.0220289	9.02402e-06	7738	TRUE	reported	textfile	0.00254038	19.7025	21.8279
	rs12516	A	G	A	G	-0.112105	-0.0369953	0.346802	0.6169	FALSE	FALSE	FALSE	43044391	0.127794	0.0242933	reported	textfile	17	41196408	0.0233813	1.62952e-06	7738	TRUE	reported	textfile	0.00296207	22.9827	21.8279
	rs12698863	A	T	A	T	-0.136533	-0.0626531	0.154424	0.157213	FALSE	TRUE	FALSE	70169252	0.0513228	0.0321501	reported	textfile	7	69634238	0.0304116	7.13888e-06	7738	TRUE	reported	textfile	0.00259799	20.1504	21.8279
	rs12936316	G	A	G	A	-0.110243	-0.0361303	0.34678	0.61716	FALSE	FALSE	FALSE	43111027	0.137004	0.0242967	reported	textfile	17	41263044	0.0233963	2.45318e-06	7738	TRUE	reported	textfile	0.00286111	22.1971	21.8279
	rs12936816	T	C	T	C	-0.110178	-0.0375351	0.347388	0.616642	FALSE	FALSE	FALSE	43149692	0.122265	0.0242893	reported	textfile	17	41301709	0.0233911	2.474e-06	7738	TRUE	reported	textfile	0.00285901	22.1807	21.8279
	rs12936831	T	C	T	C	-0.10716	-0.0360231	0.350822	0.61609	FALSE	FALSE	FALSE	43179799	0.137892	0.0242795	reported	textfile	17	41331816	0.0233423	4.41499e-06	7738	TRUE	reported	textfile	0.00271624	21.0701	21.8279
	rs12937015	C	A	C	A	-0.109896	-0.0381441	0.347375	0.616611	FALSE	FALSE	FALSE	43155456	0.116326	0.0242897	reported	textfile	17	41307473	0.0233913	2.62482e-06	7738	TRUE	reported	textfile	0.00284439	22.067	21.8279
	rs12937192	A	G	A	G	-0.107254	-0.0359967	0.350829	0.616094	FALSE	FALSE	FALSE	43173473	0.138198	0.0242805	reported	textfile	17	41325490	0.0233392	4.31887e-06	7738	TRUE	reported	textfile	0.00272172	21.1127	21.8279
	rs12940037	G	A	G	A	-0.107167	-0.0360139	0.350768	0.616088	FALSE	FALSE	FALSE	43173325	0.138028	0.0242816	reported	textfile	17	41325342	0.0233423	4.4089e-06	7738	TRUE	reported	textfile	0.00271659	21.0728	21.8279
	rs12940133	T	C	T	C	-0.108267	-0.0376563	0.351417	0.615988	FALSE	FALSE	FALSE	43348371	0.122724	0.0243976	reported	textfile	17	41425739	0.0233297	3.47216e-06	7738	TRUE	reported	textfile	0.00277548	21.5309	21.8279
	rs12940378	C	T	C	T	-0.113678	-0.036987	0.346225	0.616877	FALSE	FALSE	FALSE	43077369	0.127864	0.0242923	reported	textfile	17	41229386	0.0233659	1.14388e-06	7738	TRUE	reported	textfile	0.00304953	23.6633	21.8279
	rs12942277	C	G	C	G	-0.113198	0.0370645	0.34672	0.383295	FALSE	TRUE	FALSE	43035957	0.127055	0.0242916	reported	textfile	17	41187974	0.023512	1.47574e-06	7738	TRUE	reported	textfile	0.00298656	23.1732	21.8279
	rs12944430	G	C	G	C	-0.107209	0.0359569	0.350803	0.383812	FALSE	TRUE	FALSE	43178803	0.138687	0.0242837	reported	textfile	17	41330820	0.0233441	4.37855e-06	7738	TRUE	reported	textfile	0.0027183	21.0861	21.8279
	rs12944458	T	C	G	C	-0.115992	0.0699778	0.345753	0.00171715	TRUE	FALSE	FALSE	43028755	0.812146	0.294447	reported	textfile	17	41180772	0.023499	7.97187e-07	7738	TRUE	reported	textfile	0.0031388	24.3582	21.8279
	rs12944597	C	A	C	A	-0.113278	-0.0370578	0.346858	0.616685	FALSE	FALSE	FALSE	43035667	0.127121	0.0242914	reported	textfile	17	41187684	0.0235056	1.44148e-06	7738	TRUE	reported	textfile	0.00299239	23.2186	21.8279
	rs12950779	T	C	T	C	-0.109894	-0.0375787	0.347298	0.616642	FALSE	FALSE	FALSE	43154506	0.121832	0.0242893	reported	textfile	17	41306523	0.0233881	2.618e-06	7738	TRUE	reported	textfile	0.00284506	22.0722	21.8279
	rs12951008	G	A	G	A	-0.108426	-0.0375106	0.350749	0.616197	FALSE	FALSE	FALSE	43340014	0.124345	0.0244084	reported	textfile	17	41417382	0.0233306	3.36225e-06	7738	TRUE	reported	textfile	0.0027834	21.5925	21.8279
	rs12951574	T	C	T	C	-0.110227	-0.0375288	0.347352	0.616647	FALSE	FALSE	FALSE	43147572	0.122328	0.0242893	reported	textfile	17	41299589	0.023392	2.45064e-06	7738	TRUE	reported	textfile	0.00286133	22.1988	21.8279
	rs12951869	G	T	G	T	-0.113441	-0.0371973	0.346829	0.616812	FALSE	FALSE	FALSE	43035550	0.125793	0.0242976	reported	textfile	17	41187567	0.0235089	1.39675e-06	7738	TRUE	reported	textfile	0.00300014	23.2789	21.8279
	rs12952012	T	C	T	C	-0.110369	-0.0372124	0.34741	0.616649	FALSE	FALSE	FALSE	43169370	0.125517	0.0242897	reported	textfile	17	41321387	0.0233933	2.38194e-06	7738	TRUE	reported	textfile	0.00286837	22.2535	21.8279
	rs12952790	G	A	G	A	-0.110227	-0.0375288	0.347352	0.616647	FALSE	FALSE	FALSE	43147590	0.122328	0.0242893	reported	textfile	17	41299607	0.023392	2.45064e-06	7738	TRUE	reported	textfile	0.00286133	22.1988	21.8279
	rs13061514	A	G	A	G	-0.0995919	-0.0372021	0.562218	0.476252	FALSE	FALSE	FALSE	105683650	0.112969	0.0234715	reported	textfile	3	105402494	0.0222146	7.35428e-06	7738	TRUE	reported	textfile	0.00259069	20.0936	21.8279
	rs13119	T	C	T	C	-0.107156	-0.036023	0.350915	0.61609	FALSE	FALSE	FALSE	43210702	0.137893	0.0242795	reported	textfile	17	41362721	0.0233359	4.39258e-06	7738	TRUE	reported	textfile	0.00271752	21.08	21.8279
	rs13214578	C	T	C	T	0.136276	-0.0537103	0.829373	0.218375	FALSE	FALSE	FALSE	43734136	0.0587422	0.0284163	reported	textfile	6	43701873	0.0292969	3.29473e-06	7738	TRUE	reported	textfile	0.00278839	21.6313	21.8279
	rs13336813	T	C	T	C	-0.179646	0.112349	0.0823226	0.91028	FALSE	FALSE	FALSE	12003212	0.00796599	0.0423397	reported	textfile	16	12097069	0.0405918	9.61457e-06	7738	TRUE	reported	textfile	0.00252483	19.5815	21.8279
	rs13851	G	A	G	A	-0.106838	-0.0355375	0.35085	0.616343	FALSE	FALSE	FALSE	43219824	0.143321	0.0242819	reported	textfile	17	41371844	0.0233428	4.71867e-06	7738	TRUE	reported	textfile	0.00269987	20.9427	21.8279
	rs1399323	C	T	C	T	-0.107308	-0.0360231	0.350936	0.61609	FALSE	FALSE	FALSE	43180313	0.137892	0.0242795	reported	textfile	17	41332330	0.0233353	4.2554e-06	7738	TRUE	reported	textfile	0.00272536	21.141	21.8279
	rs1535507	C	T	C	T	0.137436	-0.0280143	0.846154	0.198322	FALSE	FALSE	FALSE	43744244	0.340625	0.0293981	reported	textfile	6	43711981	0.0304346	6.3087e-06	7738	TRUE	reported	textfile	0.00262842	20.387	21.8279
	rs1545764	A	G	A	G	-0.109246	-0.0376748	0.351255	0.615998	FALSE	FALSE	FALSE	43347197	0.122543	0.0243978	reported	textfile	17	41424565	0.0233443	2.87184e-06	7738	TRUE	reported	textfile	0.00282224	21.8946	21.8279
	rs1546733	T	C	T	C	-0.0992948	-0.0379216	0.562098	0.476436	FALSE	FALSE	FALSE	105690477	0.106162	0.0234709	reported	textfile	3	105409321	0.0221833	7.60151e-06	7738	TRUE	reported	textfile	0.00258255	20.0303	21.8279
	rs1565163	A	G	A	G	-0.107156	-0.0358367	0.350915	0.616034	FALSE	FALSE	FALSE	43209323	0.139927	0.0242785	reported	textfile	17	41361342	0.0233359	4.39258e-06	7738	TRUE	reported	textfile	0.00271752	21.08	21.8279
	rs1574328	T	A	T	A	-0.108225	0.0376175	0.351095	0.383996	FALSE	TRUE	FALSE	43324202	0.123145	0.0243999	reported	textfile	17	41401570	0.0233386	3.53248e-06	7738	TRUE	reported	textfile	0.00277122	21.4978	21.8279
	rs1574329	G	A	G	A	-0.108164	-0.0376221	0.351017	0.616004	FALSE	FALSE	FALSE	43324214	0.123099	0.0243999	reported	textfile	17	41401582	0.0233416	3.58765e-06	7738	TRUE	reported	textfile	0.0027674	21.468	21.8279
	rs16851440	C	T	C	T	-0.0995905	-0.0382895	0.562248	0.476397	FALSE	FALSE	FALSE	105685187	0.102831	0.023472	reported	textfile	3	105404031	0.0222116	7.3355e-06	7738	TRUE	reported	textfile	0.00259132	20.0985	21.8279
	rs16940	G	A	G	A	-0.110634	-0.0360188	0.346651	0.617295	FALSE	FALSE	FALSE	43093220	0.138152	0.0242926	reported	textfile	17	41245237	0.0234017	2.27196e-06	7738	TRUE	reported	textfile	0.00288006	22.3445	21.8279
	rs16941	C	T	C	T	-0.110901	-0.0366736	0.346925	0.616988	FALSE	FALSE	FALSE	43092418	0.131033	0.0242865	reported	textfile	17	41244435	0.0233992	2.1423e-06	7738	TRUE	reported	textfile	0.00289455	22.4573	21.8279
	rs16942	C	T	C	T	-0.109934	-0.0361206	0.346987	0.617153	FALSE	FALSE	FALSE	43091983	0.137077	0.0242948	reported	textfile	17	41244000	0.0233732	2.55829e-06	7738	TRUE	reported	textfile	0.00285075	22.1165	21.8279
	rs17527802	G	A	G	A	-0.107325	-0.0360231	0.350987	0.61609	FALSE	FALSE	FALSE	43197696	0.137892	0.0242795	reported	textfile	17	41349713	0.0233342	4.23575e-06	7738	TRUE	reported	textfile	0.00272648	21.1497	21.8279
	rs17527829	G	A	G	A	-0.107127	-0.0360231	0.350921	0.61609	FALSE	FALSE	FALSE	43199714	0.137892	0.0242795	reported	textfile	17	41351731	0.0233351	4.4155e-06	7738	TRUE	reported	textfile	0.00271624	21.0701	21.8279
	rs17527933	G	A	G	A	-0.107582	-0.0360231	0.351166	0.61609	FALSE	FALSE	FALSE	43202871	0.137892	0.0242795	reported	textfile	17	41354888	0.0233387	4.03506e-06	7738	TRUE	reported	textfile	0.00273846	21.2429	21.8279
	rs17600371	G	T	G	T	-0.106872	-0.0359994	0.350881	0.616707	FALSE	FALSE	FALSE	43223532	0.138628	0.0243088	reported	textfile	17	41375555	0.0233376	4.66326e-06	7738	TRUE	reported	textfile	0.00270278	20.9654	21.8279
	rs17600502	C	T	C	T	-0.10635	-0.036688	0.351618	0.616075	FALSE	FALSE	FALSE	43315939	0.132705	0.0244014	reported	textfile	17	41393295	0.0232751	4.89407e-06	7738	TRUE	reported	textfile	0.00269087	20.8727	21.8279
	rs17600553	T	C	T	C	-0.10642	-0.0382582	0.351666	0.615868	FALSE	FALSE	FALSE	43316816	0.116873	0.0243988	reported	textfile	17	41394177	0.0232709	4.80563e-06	7738	TRUE	reported	textfile	0.00269538	20.9078	21.8279
	rs17802418	C	T	C	T	0.156352	0.0384401	0.135636	0.920233	FALSE	FALSE	FALSE	33400670	0.375547	0.0433797	reported	textfile	22	33796656	0.0323327	1.32657e-06	7738	TRUE	reported	textfile	0.00301289	23.3782	21.8279
	rs1799949	A	G	A	G	-0.110704	-0.0361799	0.346688	0.617152	FALSE	FALSE	FALSE	43093449	0.136431	0.0242946	reported	textfile	17	41245466	0.0234011	2.23712e-06	7738	TRUE	reported	textfile	0.00288384	22.3739	21.8279
	rs1799966	C	T	C	T	-0.112045	-0.0371796	0.347106	0.6168	FALSE	FALSE	FALSE	43071077	0.125825	0.0242881	reported	textfile	17	41223094	0.0233627	1.61942e-06	7738	TRUE	reported	textfile	0.00296361	22.9946	21.8279
	rs1807433	G	C	G	C	-0.10688	0.0360101	0.350832	0.3839	FALSE	TRUE	FALSE	43221879	0.138145	0.0242863	reported	textfile	17	41373899	0.0233389	4.66176e-06	7738	TRUE	reported	textfile	0.00270289	20.9662	21.8279
	rs1824889	G	C	G	C	-0.106206	0.037616	0.351547	0.38399	FALSE	TRUE	FALSE	43344508	0.123123	0.0243975	reported	textfile	17	41421876	0.0233294	5.30237e-06	7738	TRUE	reported	textfile	0.00267116	20.7195	21.8279
	rs1842145	T	G	T	G	-0.10818	-0.0376947	0.350827	0.615998	FALSE	FALSE	FALSE	43357622	0.122334	0.0243971	reported	textfile	17	41434990	0.0233271	3.52606e-06	7738	TRUE	reported	textfile	0.00277165	21.5011	21.8279
	rs1842147	T	C	T	C	-0.108326	-0.0376961	0.350731	0.615993	FALSE	FALSE	FALSE	43357824	0.122311	0.0243965	reported	textfile	17	41435192	0.0233298	3.42989e-06	7738	TRUE	reported	textfile	0.00277847	21.5542	21.8279
	rs1877837	A	G	A	G	-0.110121	-0.0373906	0.347291	0.616638	FALSE	FALSE	FALSE	43129737	0.123709	0.0242892	reported	textfile	17	41281754	0.0233952	2.51391e-06	7738	TRUE	reported	textfile	0.00285507	22.15	21.8279
	rs1960605	T	C	T	C	-0.109849	-0.0374383	0.34731	0.616614	FALSE	FALSE	FALSE	43153380	0.123218	0.0242884	reported	textfile	17	41305397	0.0233864	2.6387e-06	7738	TRUE	reported	textfile	0.00284315	22.0573	21.8279
	rs1973646	C	T	C	T	-0.109725	-0.0376905	0.347333	0.616576	FALSE	FALSE	FALSE	43158478	0.120761	0.0242916	reported	textfile	17	41310495	0.0233954	2.73174e-06	7738	TRUE	reported	textfile	0.00283458	21.9906	21.8279
	rs2011530	C	T	C	T	-0.110207	-0.0374158	0.347352	0.616759	FALSE	FALSE	FALSE	43129663	0.123505	0.0242924	reported	textfile	17	41281680	0.023392	2.46156e-06	7738	TRUE	reported	textfile	0.0028603	22.1907	21.8279
	rs2037075	T	G	T	G	-0.109763	-0.0375789	0.347249	0.616643	FALSE	FALSE	FALSE	43153809	0.12183	0.0242893	reported	textfile	17	41305826	0.0233896	2.6947e-06	7738	TRUE	reported	textfile	0.00283794	22.0168	21.8279
	rs2037076	A	G	A	G	-0.109849	-0.0375793	0.34731	0.616643	FALSE	FALSE	FALSE	43153866	0.121826	0.0242893	reported	textfile	17	41305883	0.0233864	2.6387e-06	7738	TRUE	reported	textfile	0.00284315	22.0573	21.8279
	rs2070834	G	T	G	T	-0.111021	-0.0360206	0.346754	0.617144	FALSE	FALSE	FALSE	43090268	0.138201	0.0242968	reported	textfile	17	41242285	0.0233788	2.04611e-06	7738	TRUE	reported	textfile	0.00290585	22.5452	21.8279
	rs2070835	C	A	C	A	-0.116167	-0.0404329	0.343486	0.620013	FALSE	FALSE	FALSE	43022008	0.0970532	0.0243672	reported	textfile	17	41174025	0.0235497	8.10401e-07	7738	TRUE	reported	textfile	0.00313475	24.3267	21.8279
	rs2086248	C	T	C	T	-0.108442	-0.0375963	0.351346	0.616	FALSE	FALSE	FALSE	43338690	0.123319	0.0243975	reported	textfile	17	41416058	0.0233325	3.35707e-06	7738	TRUE	reported	textfile	0.00278377	21.5953	21.8279
	rs2127223	C	G	C	G	-0.108329	0.0376873	0.350636	0.384	FALSE	TRUE	FALSE	43330633	0.122461	0.0244006	reported	textfile	17	41408001	0.0233379	3.4543e-06	7738	TRUE	reported	textfile	0.0027767	21.5404	21.8279
	rs2171461	T	C	T	C	-0.108076	-0.0375824	0.350857	0.616004	FALSE	FALSE	FALSE	43326343	0.123496	0.0244	reported	textfile	17	41403711	0.0233296	3.61127e-06	7738	TRUE	reported	textfile	0.00276575	21.4552	21.8279
	rs2175957	G	T	G	T	-0.108622	-0.0375392	0.3479	0.616396	FALSE	FALSE	FALSE	43134805	0.122143	0.024284	reported	textfile	17	41286822	0.0233871	3.40887e-06	7738	TRUE	reported	textfile	0.00278	21.566	21.8279
	rs2187603	T	C	T	C	-0.1121	-0.0368887	0.346771	0.616897	FALSE	FALSE	FALSE	43061876	0.128864	0.0242913	reported	textfile	17	41213893	0.0233842	1.63618e-06	7738	TRUE	reported	textfile	0.00296108	22.9749	21.8279
	rs2271573	G	A	G	A	-0.107175	-0.0360911	0.350762	0.616102	FALSE	FALSE	FALSE	43175604	0.137155	0.0242797	reported	textfile	17	41327621	0.0233431	4.40535e-06	7738	TRUE	reported	textfile	0.00271681	21.0745	21.8279
	rs2279665	G	C	G	C	0.0976624	-0.0430772	0.588324	0.568154	FALSE	TRUE	TRUE	56433910	0.0703445	0.0238036	reported	textfile	12	56827694	0.0220067	9.08657e-06	7738	TRUE	reported	textfile	0.00253871	19.6894	21.8279
	rs2292595	C	G	C	G	-0.110178	0.0373314	0.347388	0.383395	FALSE	TRUE	FALSE	43138657	0.124308	0.0242894	reported	textfile	17	41290674	0.0233911	2.474e-06	7738	TRUE	reported	textfile	0.00285901	22.1807	21.8279
	rs2293148	C	T	C	T	-0.0998499	-0.0381855	0.565204	0.474941	FALSE	FALSE	FALSE	105655858	0.103937	0.0234834	reported	textfile	3	105374702	0.0225611	9.61015e-06	7738	TRUE	reported	textfile	0.00252492	19.5822	21.8279
	rs2298861	A	G	A	G	-0.114475	-0.0425258	0.345104	0.614984	FALSE	FALSE	FALSE	43024814	0.0801604	0.0243039	reported	textfile	17	41176831	0.0235143	1.12546e-06	7738	TRUE	reported	textfile	0.00305352	23.6944	21.8279
	rs2298862	C	T	C	T	-0.11496	-0.0382028	0.344819	0.617983	FALSE	FALSE	FALSE	43024671	0.116171	0.0243167	reported	textfile	17	41176688	0.0235164	1.01604e-06	7738	TRUE	reported	textfile	0.00307882	23.8913	21.8279
	rs2306829	T	C	T	C	-0.107127	-0.0360231	0.350921	0.61609	FALSE	FALSE	FALSE	43201789	0.137892	0.0242795	reported	textfile	17	41353806	0.0233351	4.4155e-06	7738	TRUE	reported	textfile	0.00271624	21.0701	21.8279
	rs2343818	A	G	A	G	-0.108435	-0.0376934	0.350713	0.616024	FALSE	FALSE	FALSE	43332406	0.122386	0.0243996	reported	textfile	17	41409774	0.0233303	3.35459e-06	7738	TRUE	reported	textfile	0.00278393	21.5966	21.8279
	rs2343819	G	T	G	T	-0.108444	-0.0376951	0.350773	0.616024	FALSE	FALSE	FALSE	43332285	0.122369	0.0243996	reported	textfile	17	41409653	0.023328	3.34087e-06	7738	TRUE	reported	textfile	0.00278494	21.6045	21.8279
	rs2343820	C	T	C	T	-0.108346	-0.0378373	0.35069	0.616062	FALSE	FALSE	FALSE	43330898	0.121027	0.0244037	reported	textfile	17	41408266	0.0233364	3.43724e-06	7738	TRUE	reported	textfile	0.00277793	21.5499	21.8279
	rs2736686	G	C	G	C	-0.107841	0.0374202	0.351537	0.384107	FALSE	TRUE	FALSE	43326399	0.125167	0.0244028	reported	textfile	17	41403767	0.0233356	3.81347e-06	7738	TRUE	reported	textfile	0.00275235	21.351	21.8279
	rs273900734	C	G	C	G	-0.112595	0.0368026	0.346278	0.383167	FALSE	TRUE	FALSE	43074584	0.129729	0.0242894	reported	textfile	17	41226601	0.0233719	1.45332e-06	7738	TRUE	reported	textfile	0.00299034	23.2027	21.8279
	rs3092987	C	T	C	T	-0.11215	-0.0368027	0.346866	0.616833	FALSE	FALSE	FALSE	43070706	0.129728	0.0242894	reported	textfile	17	41222723	0.0233778	1.60831e-06	7738	TRUE	reported	textfile	0.00296533	23.008	21.8279
	rs3092988	T	C	T	C	-0.112214	-0.0368031	0.346878	0.616834	FALSE	FALSE	FALSE	43049685	0.129725	0.0242895	reported	textfile	17	41201702	0.0233788	1.58811e-06	7738	TRUE	reported	textfile	0.00296845	23.0323	21.8279
	rs3092994	T	C	T	C	-0.113242	-0.0368029	0.347041	0.616833	FALSE	FALSE	FALSE	43063808	0.129726	0.0242894	reported	textfile	17	41215825	0.0233747	1.26829e-06	7738	TRUE	reported	textfile	0.00302398	23.4645	21.8279
	rs33911743	T	A	T	A	-0.107319	0.0371558	0.350981	0.384079	FALSE	TRUE	FALSE	43192295	0.125997	0.0242836	reported	textfile	17	41344312	0.0233344	4.24111e-06	7738	TRUE	reported	textfile	0.00272612	21.1469	21.8279
	rs33918839	C	T	C	T	-0.107216	-0.0360301	0.350835	0.61609	FALSE	FALSE	FALSE	43177155	0.137822	0.0242799	reported	textfile	17	41329172	0.0233384	4.34861e-06	7738	TRUE	reported	textfile	0.00271998	21.0991	21.8279
	rs33920795	G	A	G	A	-0.107191	-0.0360262	0.350835	0.616095	FALSE	FALSE	FALSE	43176993	0.137872	0.0242803	reported	textfile	17	41329010	0.023339	4.37411e-06	7738	TRUE	reported	textfile	0.00271857	21.0882	21.8279
	rs33924658	T	C	T	C	-0.107121	-0.0360231	0.350915	0.61609	FALSE	FALSE	FALSE	43192485	0.137892	0.0242795	reported	textfile	17	41344502	0.0233353	4.4211e-06	7738	TRUE	reported	textfile	0.00271589	21.0674	21.8279
	rs33926631	C	T	C	T	-0.109774	-0.0381298	0.347364	0.616612	FALSE	FALSE	FALSE	43152446	0.116464	0.0242897	reported	textfile	17	41304463	0.0233892	2.68751e-06	7738	TRUE	reported	textfile	0.00283861	22.022	21.8279
	rs33933224	C	T	C	T	-0.110092	-0.0375193	0.347327	0.616647	FALSE	FALSE	FALSE	43146417	0.122423	0.0242893	reported	textfile	17	41298434	0.0233942	2.52662e-06	7738	TRUE	reported	textfile	0.00285381	22.1403	21.8279
	rs33933393	T	C	T	C	-0.110287	-0.0376235	0.347566	0.616638	FALSE	FALSE	FALSE	43165415	0.121385	0.0242891	reported	textfile	17	41317432	0.0233932	2.42315e-06	7738	TRUE	reported	textfile	0.00286414	22.2207	21.8279
	rs33946455	T	C	T	C	-0.110422	-0.0377173	0.347488	0.616644	FALSE	FALSE	FALSE	43169829	0.120466	0.0242895	reported	textfile	17	41321846	0.0233905	2.34925e-06	7738	TRUE	reported	textfile	0.0028718	22.2802	21.8279
	rs33961729	A	C	A	C	-0.109972	-0.037456	0.347345	0.616651	FALSE	FALSE	FALSE	43135907	0.123054	0.0242892	reported	textfile	17	41287924	0.0233954	2.59406e-06	7738	TRUE	reported	textfile	0.00284732	22.0898	21.8279
	rs33988650	G	A	G	A	-0.109226	-0.037456	0.348197	0.616651	FALSE	FALSE	FALSE	43135863	0.123053	0.0242892	reported	textfile	17	41287880	0.0233983	3.03955e-06	7738	TRUE	reported	textfile	0.00280823	21.7857	21.8279
	rs33994002	A	T	A	T	-0.107209	0.036032	0.350841	0.38391	FALSE	TRUE	FALSE	43176801	0.137803	0.0242799	reported	textfile	17	41328818	0.0233376	4.35211e-06	7738	TRUE	reported	textfile	0.00271981	21.0978	21.8279
	rs34039849	A	G	A	G	0.169988	0.0117465	0.0923128	0.924147	FALSE	FALSE	FALSE	130241267	0.790888	0.0443001	reported	textfile	5	129576960	0.0383437	9.28154e-06	7738	TRUE	reported	textfile	0.00253348	19.6488	21.8279
	rs34053645	C	T	C	T	-0.108138	-0.037611	0.350827	0.616004	FALSE	FALSE	FALSE	43325506	0.123212	0.0244	reported	textfile	17	41402874	0.0233303	3.56763e-06	7738	TRUE	reported	textfile	0.00276875	21.4785	21.8279
	rs34059614	T	C	T	C	-0.109763	-0.0375587	0.347249	0.616645	FALSE	FALSE	FALSE	43151054	0.122031	0.0242893	reported	textfile	17	41303071	0.0233896	2.6947e-06	7738	TRUE	reported	textfile	0.00283794	22.0168	21.8279
	rs34086156	T	C	T	C	-0.106145	-0.038045	0.351596	0.616395	FALSE	FALSE	FALSE	43317510	0.119167	0.0244148	reported	textfile	17	41394877	0.0232736	5.09718e-06	7738	TRUE	reported	textfile	0.00268088	20.795	21.8279
	rs34093730	G	A	G	A	-0.106146	-0.0374444	0.351756	0.615997	FALSE	FALSE	FALSE	43309681	0.124862	0.0243988	reported	textfile	17	41387033	0.0232609	5.03582e-06	7738	TRUE	reported	textfile	0.00268385	20.8181	21.8279
	rs34094168	G	A	G	A	-0.107181	-0.0361612	0.351006	0.616093	FALSE	FALSE	FALSE	43227065	0.136683	0.0242976	reported	textfile	17	41379112	0.0233326	4.35682e-06	7738	TRUE	reported	textfile	0.00271956	21.0959	21.8279
	rs34120358	T	G	T	G	-0.109685	-0.0375931	0.347309	0.616641	FALSE	FALSE	FALSE	43157735	0.121688	0.0242892	reported	textfile	17	41309752	0.0233928	2.74751e-06	7738	TRUE	reported	textfile	0.00283315	21.9795	21.8279
	rs34215431	C	T	C	T	-0.134467	0.0615833	0.153179	0.845847	FALSE	FALSE	FALSE	70193359	0.0566018	0.0323039	reported	textfile	7	69658345	0.0304335	9.94466e-06	7738	TRUE	reported	textfile	0.00251654	19.5171	21.8279
	rs34234065	C	T	C	T	-0.107297	-0.0360231	0.350981	0.61609	FALSE	FALSE	FALSE	43195799	0.137892	0.0242795	reported	textfile	17	41347816	0.023335	4.26324e-06	7738	TRUE	reported	textfile	0.00272487	21.1372	21.8279
	rs34239244	G	A	G	A	-0.109937	-0.0374359	0.347285	0.616652	FALSE	FALSE	FALSE	43131848	0.123255	0.0242892	reported	textfile	17	41283865	0.0233948	2.61192e-06	7738	TRUE	reported	textfile	0.00284566	22.0768	21.8279
	rs34365396	C	T	C	T	-0.108642	-0.0406529	0.351191	0.605432	FALSE	FALSE	FALSE	43173003	0.0927107	0.0241799	reported	textfile	17	41325020	0.0233403	3.24437e-06	7738	TRUE	reported	textfile	0.00279216	21.6606	21.8279
	rs34410138	G	A	G	A	-0.104739	-0.0347825	0.370683	0.616369	FALSE	FALSE	FALSE	43127753	0.152808	0.0243289	reported	textfile	17	41279770	0.0231278	5.93485e-06	7738	TRUE	reported	textfile	0.00264344	20.5039	21.8279
	rs34474989	T	A	T	A	-0.107965	0.0387136	0.352197	0.387802	FALSE	TRUE	FALSE	43368042	0.112119	0.0243675	reported	textfile	17	41445410	0.0232977	3.58443e-06	7738	TRUE	reported	textfile	0.00276763	21.4698	21.8279
	rs34534709	G	C	G	C	-0.110092	0.0375513	0.347327	0.383355	FALSE	TRUE	FALSE	43150923	0.122104	0.0242893	reported	textfile	17	41302940	0.0233942	2.52662e-06	7738	TRUE	reported	textfile	0.00285381	22.1403	21.8279
	rs34572725	A	G	A	G	-0.108231	-0.0376837	0.350833	0.615994	FALSE	FALSE	FALSE	43351298	0.122457	0.024398	reported	textfile	17	41428666	0.0233262	3.4857e-06	7738	TRUE	reported	textfile	0.00277447	21.523	21.8279
	rs34576341	T	C	T	C	-0.108444	-0.0375838	0.350773	0.615983	FALSE	FALSE	FALSE	43333550	0.123479	0.0243998	reported	textfile	17	41410918	0.023328	3.34087e-06	7738	TRUE	reported	textfile	0.00278494	21.6045	21.8279
	rs34610160	A	G	A	G	-0.108142	-0.0376635	0.350736	0.615998	FALSE	FALSE	FALSE	43345649	0.122656	0.0243979	reported	textfile	17	41423017	0.0233308	3.56673e-06	7738	TRUE	reported	textfile	0.00276883	21.4792	21.8279
	rs34616041	A	G	A	G	-0.113406	-0.0371088	0.346768	0.61673	FALSE	FALSE	FALSE	43036769	0.126608	0.024292	reported	textfile	17	41188786	0.0235133	1.41384e-06	7738	TRUE	reported	textfile	0.00299718	23.2559	21.8279
	rs34633610	G	A	G	A	-0.108409	-0.0376196	0.350695	0.61601	FALSE	FALSE	FALSE	43342017	0.123088	0.0243975	reported	textfile	17	41419385	0.0233321	3.37886e-06	7738	TRUE	reported	textfile	0.00278217	21.5829	21.8279
	rs34942571	C	G	G	A	-0.110412	-0.0759871	0.347177	0.000851747	TRUE	TRUE	FALSE	43121362	0.857927	0.424475	reported	textfile	17	41273379	0.0234017	2.38046e-06	7738	TRUE	reported	textfile	0.00286854	22.2549	21.8279
	rs34977165	G	C	G	C	-0.108067	0.0375972	0.350779	0.383995	FALSE	TRUE	FALSE	43325961	0.123349	0.0244	reported	textfile	17	41403329	0.0233322	3.62769e-06	7738	TRUE	reported	textfile	0.00276467	21.4468	21.8279
	rs34981932	G	T	G	T	-0.107021	-0.036333	0.350904	0.615749	FALSE	FALSE	FALSE	43218055	0.134698	0.0242895	reported	textfile	17	41370074	0.0233367	4.51918e-06	7738	TRUE	reported	textfile	0.00271051	21.0255	21.8279
	rs35017602	G	A	G	A	-0.107537	-0.0360231	0.351178	0.61609	FALSE	FALSE	FALSE	43201994	0.137892	0.0242795	reported	textfile	17	41354011	0.0233371	4.06621e-06	7738	TRUE	reported	textfile	0.00273655	21.228	21.8279
	rs35170910	G	A	G	A	-0.110178	-0.037542	0.347388	0.616675	FALSE	FALSE	FALSE	43144180	0.122215	0.0242905	reported	textfile	17	41296197	0.0233911	2.474e-06	7738	TRUE	reported	textfile	0.00285901	22.1807	21.8279
	rs35221180	A	G	A	G	-0.107127	-0.0359999	0.350921	0.615976	FALSE	FALSE	FALSE	43206133	0.138185	0.0242819	reported	textfile	17	41358152	0.0233351	4.4155e-06	7738	TRUE	reported	textfile	0.00271624	21.0701	21.8279
	rs35243819	A	G	A	G	-0.107127	-0.0360673	0.350921	0.616071	FALSE	FALSE	FALSE	43201071	0.137421	0.0242801	reported	textfile	17	41353088	0.0233351	4.4155e-06	7738	TRUE	reported	textfile	0.00271624	21.0701	21.8279
	rs35253360	T	C	T	C	-0.106072	-0.0375596	0.351721	0.616264	FALSE	FALSE	FALSE	43308624	0.123695	0.0243981	reported	textfile	17	41385976	0.0232711	5.16155e-06	7738	TRUE	reported	textfile	0.00267778	20.7709	21.8279
	rs35265669	T	C	T	C	-0.10615	-0.0374125	0.35175	0.616024	FALSE	FALSE	FALSE	43307043	0.12516	0.0243973	reported	textfile	17	41384405	0.0232737	5.09178e-06	7738	TRUE	reported	textfile	0.00268111	20.7968	21.8279
	rs35292991	A	C	A	C	-0.106954	-0.0362219	0.350703	0.616345	FALSE	FALSE	FALSE	43181999	0.136097	0.0243021	reported	textfile	17	41334016	0.0233392	4.59272e-06	7738	TRUE	reported	textfile	0.00270655	20.9947	21.8279
	rs35330014	T	C	T	C	-0.113327	-0.037177	0.346927	0.616522	FALSE	FALSE	FALSE	43060530	0.125823	0.0242862	reported	textfile	17	41212547	0.0233746	1.24526e-06	7738	TRUE	reported	textfile	0.00302853	23.4999	21.8279
	rs35332877	T	G	T	G	-0.106022	-0.037466	0.351714	0.616029	FALSE	FALSE	FALSE	43312038	0.124643	0.0243987	reported	textfile	17	41389393	0.0232628	5.17476e-06	7738	TRUE	reported	textfile	0.00267716	20.7661	21.8279
	rs35399157	C	G	C	G	-0.108444	0.0376432	0.350755	0.38398	FALSE	TRUE	FALSE	43334234	0.122875	0.024399	reported	textfile	17	41411602	0.0233284	3.34226e-06	7738	TRUE	reported	textfile	0.00278485	21.6037	21.8279
	rs35406806	A	G	A	G	-0.110045	-0.0374359	0.347352	0.616652	FALSE	FALSE	FALSE	43131837	0.123255	0.0242892	reported	textfile	17	41283854	0.0233921	2.54671e-06	7738	TRUE	reported	textfile	0.00285189	22.1253	21.8279
	rs35521261	G	A	G	A	-0.10944	-0.0381559	0.347512	0.616606	FALSE	FALSE	FALSE	43161595	0.116216	0.0242899	reported	textfile	17	41313612	0.0233993	2.90985e-06	7738	TRUE	reported	textfile	0.00281898	21.8693	21.8279
	rs35593315	T	C	T	C	-0.108113	-0.0377841	0.350873	0.615999	FALSE	FALSE	FALSE	43346576	0.121487	0.0243995	reported	textfile	17	41423944	0.0233303	3.58666e-06	7738	TRUE	reported	textfile	0.00276747	21.4686	21.8279
	rs35612701	A	G	A	G	-0.108339	-0.0377019	0.350696	0.616021	FALSE	FALSE	FALSE	43330929	0.122332	0.0244016	reported	textfile	17	41408297	0.0233356	3.44009e-06	7738	TRUE	reported	textfile	0.00277776	21.5486	21.8279
	rs35635387	G	A	G	A	-0.107537	-0.0360399	0.351178	0.616118	FALSE	FALSE	FALSE	43204542	0.137726	0.0242805	reported	textfile	17	41356559	0.0233371	4.06621e-06	7738	TRUE	reported	textfile	0.00273655	21.228	21.8279
	rs35788301	A	G	A	G	-0.108338	-0.0376917	0.350785	0.615999	FALSE	FALSE	FALSE	43330686	0.122417	0.0244005	reported	textfile	17	41408054	0.0233372	3.44588e-06	7738	TRUE	reported	textfile	0.00277733	21.5453	21.8279
	rs35908185	T	A	T	A	-0.110095	0.0366938	0.347089	0.383182	FALSE	TRUE	FALSE	43103094	0.130868	0.0242895	reported	textfile	17	41255111	0.0233999	2.53922e-06	7738	TRUE	reported	textfile	0.00285258	22.1307	21.8279
	rs35954893	G	A	G	A	-0.107254	-0.0360231	0.350858	0.61609	FALSE	FALSE	FALSE	43181769	0.137892	0.0242795	reported	textfile	17	41333786	0.0233352	4.3017e-06	7738	TRUE	reported	textfile	0.00272265	21.1199	21.8279
	rs35956818	C	T	C	T	-0.108144	-0.037663	0.350802	0.615998	FALSE	FALSE	FALSE	43345617	0.122661	0.0243979	reported	textfile	17	41422985	0.0233277	3.55492e-06	7738	TRUE	reported	textfile	0.00276967	21.4857	21.8279
	rs35960318	T	C	T	C	-0.107113	-0.0360013	0.350993	0.61605	FALSE	FALSE	FALSE	43225162	0.138383	0.024295	reported	textfile	17	41377185	0.023333	4.41967e-06	7738	TRUE	reported	textfile	0.00271602	21.0684	21.8279
	rs35981166	A	C	A	C	-0.110257	-0.0374973	0.347326	0.616715	FALSE	FALSE	FALSE	43127820	0.122691	0.0242925	reported	textfile	17	41279837	0.0233954	2.4436e-06	7738	TRUE	reported	textfile	0.00286205	22.2044	21.8279
	rs35989681	A	C	A	C	-0.106875	-0.0359781	0.350909	0.616099	FALSE	FALSE	FALSE	43218965	0.138418	0.0242815	reported	textfile	17	41370984	0.0233355	4.65093e-06	7738	TRUE	reported	textfile	0.00270342	20.9704	21.8279
	rs35993618	G	A	G	A	-0.108479	-0.0368484	0.351358	0.616065	FALSE	FALSE	FALSE	43331490	0.131067	0.0244045	reported	textfile	17	41408858	0.0233315	3.32782e-06	7738	TRUE	reported	textfile	0.0027859	21.6119	21.8279
	rs35995789	T	C	T	C	-0.107127	-0.0361504	0.350921	0.616333	FALSE	FALSE	FALSE	43200626	0.136514	0.02428	reported	textfile	17	41352643	0.0233351	4.4155e-06	7738	TRUE	reported	textfile	0.00271624	21.0701	21.8279
	rs36035445	G	A	G	A	-0.108281	-0.0376799	0.351281	0.615967	FALSE	FALSE	FALSE	43331213	0.12254	0.024401	reported	textfile	17	41408581	0.0233383	3.49052e-06	7738	TRUE	reported	textfile	0.00277416	21.5206	21.8279
	rs36036395	C	T	C	T	-0.116129	-0.0381266	0.345681	0.618156	FALSE	FALSE	FALSE	43029280	0.116892	0.0243162	reported	textfile	17	41181297	0.0235013	7.75604e-07	7738	TRUE	reported	textfile	0.00314558	24.411	21.8279
	rs36086436	C	A	C	A	-0.110497	-0.0373878	0.347238	0.616656	FALSE	FALSE	FALSE	43121520	0.123737	0.0242892	reported	textfile	17	41273537	0.0233986	2.33077e-06	7738	TRUE	reported	textfile	0.00287371	22.2951	21.8279
	rs36107656	G	A	G	A	-0.107582	-0.0360231	0.351166	0.61609	FALSE	FALSE	FALSE	43201902	0.137892	0.0242795	reported	textfile	17	41353919	0.0233387	4.03506e-06	7738	TRUE	reported	textfile	0.00273846	21.2429	21.8279
	rs36114164	T	C	T	C	-0.108679	-0.0377964	0.350647	0.616261	FALSE	FALSE	FALSE	43333092	0.121372	0.0243999	reported	textfile	17	41410460	0.0233325	3.19544e-06	7738	TRUE	reported	textfile	0.00279592	21.6898	21.8279
	rs36116919	A	G	A	G	-0.107113	-0.0360179	0.350909	0.616099	FALSE	FALSE	FALSE	43195804	0.137958	0.02428	reported	textfile	17	41347821	0.0233354	4.42935e-06	7738	TRUE	reported	textfile	0.00271547	21.064	21.8279
	rs3744242	C	T	C	T	-0.10707	-0.0360231	0.350994	0.61609	FALSE	FALSE	FALSE	43194781	0.137892	0.0242795	reported	textfile	17	41346798	0.0233389	4.48363e-06	7738	TRUE	reported	textfile	0.00271248	21.0408	21.8279
	rs3744244	T	C	T	C	-0.107113	-0.036009	0.350993	0.616091	FALSE	FALSE	FALSE	43224081	0.138253	0.0242922	reported	textfile	17	41376104	0.023333	4.41967e-06	7738	TRUE	reported	textfile	0.00271602	21.0684	21.8279
	rs3765640	G	A	G	A	-0.110497	-0.0374005	0.347238	0.616655	FALSE	FALSE	FALSE	43124230	0.123609	0.0242892	reported	textfile	17	41276247	0.0233986	2.33077e-06	7738	TRUE	reported	textfile	0.00287371	22.2951	21.8279
	rs3772539	A	G	A	G	-0.0995649	-0.0378307	0.562026	0.476364	FALSE	FALSE	FALSE	105684284	0.10699	0.02347	reported	textfile	3	105403128	0.0222166	7.41003e-06	7738	TRUE	reported	textfile	0.00258883	20.0791	21.8279
	rs3785546	C	T	C	T	-0.112886	-0.0396289	0.347075	0.61301	FALSE	FALSE	FALSE	43064916	0.102577	0.0242751	reported	textfile	17	41216933	0.0233785	1.37461e-06	7738	TRUE	reported	textfile	0.00300408	23.3096	21.8279
	rs3803871	G	A	G	A	-0.107158	-0.0362432	0.350999	0.615854	FALSE	FALSE	FALSE	43212891	0.135556	0.0242828	reported	textfile	17	41364910	0.0233336	4.38077e-06	7738	TRUE	reported	textfile	0.00271816	21.085	21.8279
	rs3950989	A	G	A	G	-0.11136	-0.0361294	0.346641	0.617159	FALSE	FALSE	FALSE	43085936	0.137012	0.0242967	reported	textfile	17	41237953	0.0233893	1.92473e-06	7738	TRUE	reported	textfile	0.00292095	22.6627	21.8279
	rs4024642	C	A	C	A	0.111836	0.0147662	0.720903	0.29804	FALSE	FALSE	FALSE	23869771	0.56732	0.0258148	reported	textfile	3	23911262	0.0247258	6.09537e-06	7738	TRUE	reported	textfile	0.00263686	20.4527	21.8279
	rs4239148	A	G	A	G	-0.102518	-0.0354657	0.352996	0.614942	FALSE	FALSE	FALSE	43077840	0.143895	0.0242677	reported	textfile	17	41229857	0.0231857	9.79693e-06	7738	TRUE	reported	textfile	0.0025202	19.5455	21.8279
	rs4302037	T	C	T	C	0.105	0.00696411	0.537511	0.41269	FALSE	FALSE	FALSE	25474904	0.77198	0.0240318	reported	textfile	16	25486225	0.02272	3.81013e-06	7738	TRUE	reported	textfile	0.00275256	21.3525	21.8279
	rs4318274	A	T	A	T	-0.102571	0.0354657	0.352984	0.385058	FALSE	TRUE	FALSE	43077891	0.143895	0.0242677	reported	textfile	17	41229908	0.0231866	9.70287e-06	7738	TRUE	reported	textfile	0.00252261	19.5642	21.8279
	rs4340367	A	G	A	G	-0.109896	-0.0381436	0.347375	0.616611	FALSE	FALSE	FALSE	43155755	0.116331	0.0242897	reported	textfile	17	41307772	0.0233913	2.62482e-06	7738	TRUE	reported	textfile	0.00284439	22.067	21.8279
	rs4346244	A	G	A	G	-0.108502	-0.0376289	0.350731	0.616014	FALSE	FALSE	FALSE	43336925	0.123004	0.0243982	reported	textfile	17	41414293	0.0233298	3.30621e-06	7738	TRUE	reported	textfile	0.00278748	21.6243	21.8279
	rs4352088	G	A	G	A	-0.108709	-0.0376016	0.350641	0.616013	FALSE	FALSE	FALSE	43337311	0.123276	0.0243981	reported	textfile	17	41414679	0.0233327	3.17607e-06	7738	TRUE	reported	textfile	0.00279741	21.7014	21.8279
	rs4356517	C	T	C	T	-0.108444	-0.0373669	0.350773	0.616143	FALSE	FALSE	FALSE	43332048	0.12579	0.0244082	reported	textfile	17	41409416	0.023328	3.34087e-06	7738	TRUE	reported	textfile	0.00278494	21.6045	21.8279
	rs4445938	C	A	C	A	-0.107237	-0.0360231	0.350918	0.61609	FALSE	FALSE	FALSE	43185883	0.137892	0.0242795	reported	textfile	17	41337900	0.0233342	4.3131e-06	7738	TRUE	reported	textfile	0.00272202	21.115	21.8279
	rs4520874	G	A	G	A	-0.108418	-0.037608	0.350755	0.61601	FALSE	FALSE	FALSE	43338154	0.123204	0.0243976	reported	textfile	17	41415522	0.0233298	3.36496e-06	7738	TRUE	reported	textfile	0.00278318	21.5908	21.8279
	rs4534897	G	A	G	A	-0.108127	-0.0377602	0.350988	0.616075	FALSE	FALSE	FALSE	43354440	0.121771	0.0244026	reported	textfile	17	41431808	0.0233342	3.58972e-06	7738	TRUE	reported	textfile	0.00276726	21.4669	21.8279
	rs4584865	G	C	G	C	-0.108231	0.0376718	0.350815	0.384002	FALSE	TRUE	FALSE	43347551	0.122573	0.0243978	reported	textfile	17	41424919	0.0233267	3.48723e-06	7738	TRUE	reported	textfile	0.00277435	21.5221	21.8279
	rs4600503	G	C	G	C	-0.108502	0.0376222	0.350731	0.383987	FALSE	TRUE	FALSE	43336956	0.123072	0.0243982	reported	textfile	17	41414324	0.0233298	3.30621e-06	7738	TRUE	reported	textfile	0.00278748	21.6243	21.8279
	rs4792977	G	A	G	A	-0.110142	-0.036932	0.347166	0.616526	FALSE	FALSE	FALSE	43108791	0.128534	0.0242988	reported	textfile	17	41260808	0.0233938	2.49925e-06	7738	TRUE	reported	textfile	0.00285649	22.1611	21.8279
	rs4792978	T	G	T	G	-0.110646	-0.0374775	0.347507	0.616649	FALSE	FALSE	FALSE	43139762	0.122838	0.0242892	reported	textfile	17	41291779	0.0233937	2.24807e-06	7738	TRUE	reported	textfile	0.00288264	22.3646	21.8279
	rs4792979	T	C	T	C	-0.110176	-0.0375188	0.347399	0.616647	FALSE	FALSE	FALSE	43146498	0.122428	0.0242893	reported	textfile	17	41298515	0.023398	2.49207e-06	7738	TRUE	reported	textfile	0.00285723	22.1669	21.8279
	rs4792981	G	A	G	A	-0.109875	-0.0376226	0.347411	0.615766	FALSE	FALSE	FALSE	43156257	0.121214	0.0242774	reported	textfile	17	41308274	0.0233931	2.64113e-06	7738	TRUE	reported	textfile	0.00284287	22.0551	21.8279
	rs4792982	C	T	C	T	-0.110156	-0.0376281	0.34765	0.616638	FALSE	FALSE	FALSE	43166783	0.12134	0.0242891	reported	textfile	17	41318800	0.023396	2.49793e-06	7738	TRUE	reported	textfile	0.00285668	22.1626	21.8279
	rs4793189	A	G	A	G	-0.113381	-0.0371831	0.346764	0.61672	FALSE	FALSE	FALSE	43038698	0.12584	0.0242913	reported	textfile	17	41190715	0.0234945	1.39409e-06	7738	TRUE	reported	textfile	0.00300064	23.2828	21.8279
	rs4793190	C	T	C	T	-0.11217	-0.0364747	0.346957	0.616953	FALSE	FALSE	FALSE	43048092	0.133263	0.0242945	reported	textfile	17	41200109	0.0233745	1.59603e-06	7738	TRUE	reported	textfile	0.00296722	23.0227	21.8279
	rs4793191	G	A	G	A	-0.112418	-0.036731	0.346815	0.616813	FALSE	FALSE	FALSE	43052360	0.130478	0.0242895	reported	textfile	17	41204377	0.0233853	1.53049e-06	7738	TRUE	reported	textfile	0.00297757	23.1033	21.8279
	rs4793192	C	T	C	T	-0.112189	-0.036731	0.346754	0.616813	FALSE	FALSE	FALSE	43052373	0.130478	0.0242895	reported	textfile	17	41204390	0.0233841	1.60539e-06	7738	TRUE	reported	textfile	0.00296579	23.0116	21.8279
	rs4793193	C	A	C	A	-0.113273	-0.036803	0.346939	0.616833	FALSE	FALSE	FALSE	43060321	0.129725	0.0242894	reported	textfile	17	41212338	0.0233736	1.25866e-06	7738	TRUE	reported	textfile	0.00302592	23.4795	21.8279
	rs4793194	A	G	A	G	-0.112153	-0.0367655	0.346927	0.616783	FALSE	FALSE	FALSE	43066316	0.130127	0.0242901	reported	textfile	17	41218333	0.0233762	1.60461e-06	7738	TRUE	reported	textfile	0.00296589	23.0124	21.8279
	rs4793195	C	T	C	T	-0.111835	-0.0368503	0.346873	0.616863	FALSE	FALSE	FALSE	43066555	0.129259	0.024291	reported	textfile	17	41218572	0.0233762	1.71716e-06	7738	TRUE	reported	textfile	0.00294915	22.8821	21.8279
	rs4793197	A	G	A	G	-0.112075	-0.0367898	0.34636	0.616818	FALSE	FALSE	FALSE	43079885	0.129874	0.0242901	reported	textfile	17	41231902	0.0233839	1.64433e-06	7738	TRUE	reported	textfile	0.00295984	22.9653	21.8279
	rs4793204	G	A	G	A	-0.1103	-0.0374106	0.347382	0.616654	FALSE	FALSE	FALSE	43127281	0.123508	0.0242892	reported	textfile	17	41279298	0.0233914	2.41218e-06	7738	TRUE	reported	textfile	0.00286526	22.2293	21.8279
	rs4793207	G	A	G	A	-0.110178	-0.0374667	0.347388	0.61665	FALSE	FALSE	FALSE	43137747	0.122946	0.0242892	reported	textfile	17	41289764	0.0233911	2.474e-06	7738	TRUE	reported	textfile	0.00285901	22.1807	21.8279
	rs4793209	G	C	G	C	-0.110059	0.037945	0.347333	0.383456	FALSE	TRUE	FALSE	43140410	0.118252	0.0242902	reported	textfile	17	41292427	0.023394	2.54396e-06	7738	TRUE	reported	textfile	0.00285215	22.1274	21.8279
	rs4793210	A	G	A	G	-0.110227	-0.0375193	0.347417	0.616647	FALSE	FALSE	FALSE	43146482	0.122423	0.0242893	reported	textfile	17	41298499	0.0233993	2.46877e-06	7738	TRUE	reported	textfile	0.00285955	22.1849	21.8279
	rs4793212	C	T	C	T	-0.110092	-0.0370983	0.347327	0.616392	FALSE	FALSE	FALSE	43150733	0.126784	0.0242964	reported	textfile	17	41302750	0.0233942	2.52662e-06	7738	TRUE	reported	textfile	0.00285381	22.1403	21.8279
	rs4793215	A	G	A	G	-0.110205	-0.0376282	0.3475	0.616638	FALSE	FALSE	FALSE	43166915	0.121339	0.0242891	reported	textfile	17	41318932	0.0233959	2.47195e-06	7738	TRUE	reported	textfile	0.00285924	22.1825	21.8279
	rs4793216	G	A	G	A	-0.107308	-0.0360231	0.350936	0.61609	FALSE	FALSE	FALSE	43183455	0.137892	0.0242795	reported	textfile	17	41335472	0.0233353	4.2554e-06	7738	TRUE	reported	textfile	0.00272536	21.141	21.8279
	rs4793217	A	G	A	G	-0.106745	-0.0360231	0.351052	0.61609	FALSE	FALSE	FALSE	43194266	0.137892	0.0242795	reported	textfile	17	41346283	0.0233411	4.80253e-06	7738	TRUE	reported	textfile	0.00269558	20.9093	21.8279
	rs4793224	G	C	G	C	-0.105987	0.0374998	0.351661	0.383968	FALSE	TRUE	FALSE	43311213	0.124305	0.0243988	reported	textfile	17	41388568	0.0232666	5.22986e-06	7738	TRUE	reported	textfile	0.00267453	20.7457	21.8279
	rs4793226	G	A	G	A	-0.108356	-0.0376408	0.350809	0.616002	FALSE	FALSE	FALSE	43328049	0.122925	0.0244007	reported	textfile	17	41405417	0.0233303	3.40989e-06	7738	TRUE	reported	textfile	0.00277989	21.5652	21.8279
	rs4793227	C	A	C	A	-0.108459	-0.0377488	0.351388	0.616249	FALSE	FALSE	FALSE	43334882	0.12183	0.0243991	reported	textfile	17	41412250	0.0233329	3.34649e-06	7738	TRUE	reported	textfile	0.00278454	21.6014	21.8279
	rs4793229	G	A	G	A	-0.108444	-0.0374876	0.350773	0.616203	FALSE	FALSE	FALSE	43340966	0.124575	0.0244083	reported	textfile	17	41418334	0.023328	3.34087e-06	7738	TRUE	reported	textfile	0.00278494	21.6045	21.8279
	rs4793230	C	A	C	A	-0.108875	-0.0376828	0.351519	0.615988	FALSE	FALSE	FALSE	43350035	0.122468	0.0243981	reported	textfile	17	41427403	0.0233174	3.02315e-06	7738	TRUE	reported	textfile	0.00280961	21.7964	21.8279
	rs4793231	G	A	G	A	-0.108072	-0.0378252	0.350611	0.615879	FALSE	FALSE	FALSE	43350101	0.121122	0.0244021	reported	textfile	17	41427469	0.0233355	3.6353e-06	7738	TRUE	reported	textfile	0.00276415	21.4427	21.8279
	rs4793233	C	G	C	G	-0.108349	0.0376782	0.350802	0.384002	FALSE	TRUE	FALSE	43358069	0.122499	0.0243972	reported	textfile	17	41435437	0.0233265	3.40267e-06	7738	TRUE	reported	textfile	0.00278043	21.5694	21.8279
	rs4793234	G	A	G	A	-0.108107	-0.0376738	0.350874	0.615997	FALSE	FALSE	FALSE	43358815	0.122536	0.0243967	reported	textfile	17	41436183	0.0233278	3.58187e-06	7738	TRUE	reported	textfile	0.00276776	21.4708	21.8279
	rs4793236	C	T	C	T	-0.108205	-0.0376404	0.350856	0.615999	FALSE	FALSE	FALSE	43359072	0.122869	0.0243968	reported	textfile	17	41436440	0.0233301	3.51803e-06	7738	TRUE	reported	textfile	0.00277222	21.5055	21.8279
	rs4793237	T	A	T	A	-0.109181	0.0376617	0.352096	0.384014	FALSE	TRUE	FALSE	43359227	0.122653	0.0243965	reported	textfile	17	41436595	0.0233079	2.80957e-06	7738	TRUE	reported	textfile	0.00282767	21.9369	21.8279
	rs4894940	A	C	A	C	-0.0995099	-0.0377248	0.562182	0.476323	FALSE	FALSE	FALSE	105687814	0.107996	0.0234714	reported	textfile	3	105406658	0.0222106	7.45401e-06	7738	TRUE	reported	textfile	0.00258737	20.0678	21.8279
	rs5018133	G	C	G	C	-0.109856	0.0381437	0.347303	0.383389	FALSE	TRUE	FALSE	43155670	0.11633	0.0242897	reported	textfile	17	41307687	0.023396	2.6595e-06	7738	TRUE	reported	textfile	0.00284119	22.0421	21.8279
	rs56729776	T	C	T	C	-0.108162	-0.0376174	0.350754	0.61601	FALSE	FALSE	FALSE	43344763	0.123108	0.0243975	reported	textfile	17	41422131	0.0233303	3.55001e-06	7738	TRUE	reported	textfile	0.00276997	21.488	21.8279
	rs57224868	A	G	A	G	0.120247	0.0197305	0.780381	0.222116	FALSE	FALSE	FALSE	11878788	0.489007	0.0285169	reported	textfile	18	11878787	0.0270269	8.62085e-06	7738	TRUE	reported	textfile	0.00255163	19.7899	21.8279
	rs5998901	C	T	C	T	0.160175	0.0454091	0.136341	0.919277	FALSE	FALSE	FALSE	33381273	0.29223	0.0431136	reported	textfile	22	33777259	0.0325027	8.30539e-07	7738	TRUE	reported	textfile	0.00312868	24.2794	21.8279
	rs5998902	G	T	G	T	0.160175	0.045409	0.136341	0.919274	FALSE	FALSE	FALSE	33381283	0.29223	0.0431136	reported	textfile	22	33777269	0.0325027	8.30539e-07	7738	TRUE	reported	textfile	0.00312868	24.2794	21.8279
	rs60309406	T	C	T	C	-0.108169	-0.0376227	0.350844	0.615997	FALSE	FALSE	FALSE	43358297	0.123048	0.024397	reported	textfile	17	41435665	0.023326	3.52988e-06	7738	TRUE	reported	textfile	0.00277135	21.4987	21.8279
	rs61861334	C	T	C	T	-0.147413	0.00167075	0.16831	0.842697	FALSE	FALSE	FALSE	104207417	0.95939	0.0328119	reported	textfile	10	105967175	0.0316697	3.24452e-06	7738	TRUE	reported	textfile	0.00279216	21.6606	21.8279
	rs6581095	G	A	G	A	0.0972034	0.0430614	0.588168	0.431848	FALSE	FALSE	FALSE	56434509	0.0704547	0.0238043	reported	textfile	12	56828293	0.0220056	9.99862e-06	7738	TRUE	reported	textfile	0.00251521	19.5067	21.8279
	rs66499067	C	G	C	G	-0.109816	0.0363607	0.346771	0.382353	FALSE	TRUE	FALSE	43096467	0.134746	0.0243111	reported	textfile	17	41248484	0.0233957	2.6812e-06	7738	TRUE	reported	textfile	0.0028392	22.0266	21.8279
	rs67060599	G	A	G	A	-0.109792	-0.0366938	0.346981	0.616818	FALSE	FALSE	FALSE	43103085	0.130868	0.0242895	reported	textfile	17	41255102	0.0234017	2.7105e-06	7738	TRUE	reported	textfile	0.00283651	22.0057	21.8279
	rs6767808	A	G	A	G	-0.0995099	-0.0380693	0.562182	0.476327	FALSE	FALSE	FALSE	105686697	0.1048	0.0234704	reported	textfile	3	105405541	0.0222106	7.45401e-06	7738	TRUE	reported	textfile	0.00258737	20.0678	21.8279
	rs6787175	G	C	G	C	0.0983044	-0.0377478	0.43811	0.476228	FALSE	TRUE	TRUE	105697577	0.107805	0.023473	reported	textfile	3	105416421	0.02216	9.15904e-06	7738	TRUE	reported	textfile	0.00253673	19.6741	21.8279
	rs6800344	A	T	A	T	0.0983095	-0.0372309	0.43811	0.476358	FALSE	TRUE	TRUE	105697772	0.112792	0.0234782	reported	textfile	3	105416616	0.0221575	9.12893e-06	7738	TRUE	reported	textfile	0.00253757	19.6805	21.8279
	rs6920449	C	T	C	T	0.13898	-0.0275973	0.846308	0.197992	FALSE	FALSE	FALSE	43742611	0.348224	0.0294202	reported	textfile	6	43710348	0.0305421	5.35316e-06	7738	TRUE	reported	textfile	0.00266881	20.7012	21.8279
	rs71190320	G	A	G	A	-0.108689	-0.0376305	0.350731	0.616017	FALSE	FALSE	FALSE	43336657	0.122991	0.0243983	reported	textfile	17	41414025	0.023329	3.17768e-06	7738	TRUE	reported	textfile	0.00279727	21.7003	21.8279
	rs71367986	G	A	G	A	-0.106977	-0.0374271	0.352966	0.615983	FALSE	FALSE	FALSE	43309699	0.125032	0.0243985	reported	textfile	17	41387051	0.0232421	4.16956e-06	7738	TRUE	reported	textfile	0.00273032	21.1796	21.8279
	rs71379211	G	A	G	A	-0.107817	-0.036046	0.351284	0.616095	FALSE	FALSE	FALSE	43204928	0.137646	0.0242798	reported	textfile	17	41356947	0.0233337	3.82525e-06	7738	TRUE	reported	textfile	0.00275158	21.3449	21.8279
	rs71379212	G	A	G	A	-0.107537	-0.0359705	0.351178	0.616081	FALSE	FALSE	FALSE	43205628	0.138465	0.0242792	reported	textfile	17	41357647	0.0233371	4.06621e-06	7738	TRUE	reported	textfile	0.00273655	21.228	21.8279
	rs71379217	G	A	G	A	-0.106146	-0.0372571	0.351756	0.6159	FALSE	FALSE	FALSE	43310023	0.12676	0.0243988	reported	textfile	17	41387375	0.0232609	5.03582e-06	7738	TRUE	reported	textfile	0.00268385	20.8181	21.8279
	rs71379220	T	A	T	A	-0.108418	0.0374875	0.350755	0.383797	FALSE	TRUE	FALSE	43339745	0.124575	0.0244083	reported	textfile	17	41417113	0.0233298	3.36496e-06	7738	TRUE	reported	textfile	0.00278318	21.5908	21.8279
	rs7223460	A	T	A	T	-0.109144	0.0386814	0.352605	0.388078	FALSE	TRUE	FALSE	43371926	0.112418	0.0243675	reported	textfile	17	41449294	0.023534	3.52314e-06	7738	TRUE	reported	textfile	0.00277188	21.5028	21.8279
	rs72829113	T	C	T	C	-0.116136	-0.0393358	0.345764	0.618069	FALSE	FALSE	FALSE	43029818	0.105729	0.024316	reported	textfile	17	41181835	0.0234953	7.69538e-07	7738	TRUE	reported	textfile	0.00314756	24.4264	21.8279
	rs7302060	C	T	C	T	-0.0995836	-0.039536	0.387103	0.6257	FALSE	FALSE	FALSE	56435308	0.104382	0.0243452	reported	textfile	12	56829092	0.0223424	8.3052e-06	7738	TRUE	reported	textfile	0.00256079	19.8611	21.8279
	rs7312888	C	G	C	G	0.0973826	-0.0429254	0.588007	0.568103	FALSE	TRUE	TRUE	56434764	0.0713773	0.0238068	reported	textfile	12	56828548	0.0220097	9.66563e-06	7738	TRUE	reported	textfile	0.00252353	19.5714	21.8279
	rs73311417	G	A	G	A	-0.115721	-0.0381217	0.345735	0.618156	FALSE	FALSE	FALSE	43029729	0.116939	0.0243162	reported	textfile	17	41181746	0.0234956	8.42733e-07	7738	TRUE	reported	textfile	0.00312509	24.2515	21.8279
	rs7406399	T	C	T	C	-0.107031	-0.0364636	0.350951	0.616454	FALSE	FALSE	FALSE	43225824	0.133799	0.0243206	reported	textfile	17	41377871	0.0233349	4.50267e-06	7738	TRUE	reported	textfile	0.00271144	21.0327	21.8279
	rs748620	G	C	G	C	-0.107354	0.036023	0.350981	0.38391	FALSE	TRUE	FALSE	43210253	0.137893	0.0242795	reported	textfile	17	41362272	0.023335	4.21376e-06	7738	TRUE	reported	textfile	0.00272776	21.1597	21.8279
	rs7503154	C	A	C	A	-0.110963	-0.0377406	0.346796	0.616592	FALSE	FALSE	FALSE	43095587	0.120267	0.0242916	reported	textfile	17	41247604	0.0234173	2.15303e-06	7738	TRUE	reported	textfile	0.00289331	22.4476	21.8279
	rs76275858	C	T	C	T	-0.105864	-0.0375064	0.351643	0.616017	FALSE	FALSE	FALSE	43314799	0.124244	0.0243991	reported	textfile	17	41392153	0.0232654	5.35784e-06	7738	TRUE	reported	textfile	0.00266862	20.6997	21.8279
	rs7651185	C	T	C	T	0.111688	0.0137715	0.720849	0.298336	FALSE	FALSE	FALSE	23868167	0.593331	0.0257887	reported	textfile	3	23909658	0.0247281	6.28203e-06	7738	TRUE	reported	textfile	0.00262942	20.3948	21.8279
	rs774034	C	T	C	T	-0.0972081	-0.0430622	0.411372	0.568153	FALSE	FALSE	FALSE	56431953	0.0704385	0.0238034	reported	textfile	12	56825737	0.0220048	9.98068e-06	7738	TRUE	reported	textfile	0.00251563	19.51	21.8279
	rs77584072	C	T	C	T	-0.106146	-0.0374698	0.351756	0.616019	FALSE	FALSE	FALSE	43310255	0.124596	0.0243981	reported	textfile	17	41387610	0.0232609	5.03582e-06	7738	TRUE	reported	textfile	0.00268385	20.8181	21.8279
	rs7764284	T	A	T	A	0.142213	0.0273787	0.850719	0.802704	FALSE	TRUE	FALSE	43740785	0.353012	0.0294786	reported	textfile	6	43708522	0.0309414	4.30239e-06	7738	TRUE	reported	textfile	0.00272261	21.1196	21.8279
	rs77716933	G	T	G	T	0.159966	0.0453653	0.136566	0.919235	FALSE	FALSE	FALSE	33387767	0.292571	0.0431025	reported	textfile	22	33783753	0.0324729	8.38726e-07	7738	TRUE	reported	textfile	0.00312626	24.2606	21.8279
	rs77940339	T	C	T	C	-0.106215	-0.0375168	0.352244	0.616008	FALSE	FALSE	FALSE	43316714	0.124146	0.0243996	reported	textfile	17	41394075	0.0232715	5.01499e-06	7738	TRUE	reported	textfile	0.00268489	20.8262	21.8279
	rs7807263	C	A	C	A	-0.122248	0.0466661	0.197567	0.772105	FALSE	FALSE	FALSE	70145740	0.0940979	0.0278742	reported	textfile	7	69610726	0.0275919	9.39767e-06	7738	TRUE	reported	textfile	0.00253041	19.6249	21.8279
	rs78665288	C	T	C	T	0.160433	0.0454122	0.136401	0.919279	FALSE	FALSE	FALSE	33377770	0.29223	0.0431166	reported	textfile	22	33773756	0.0326022	8.61331e-07	7738	TRUE	reported	textfile	0.00311966	24.2092	21.8279
	rs78845268	A	G	A	G	-0.10615	-0.0374074	0.35175	0.616023	FALSE	FALSE	FALSE	43306410	0.125208	0.0243971	reported	textfile	17	41383772	0.0232737	5.09178e-06	7738	TRUE	reported	textfile	0.00268111	20.7968	21.8279
	rs79860307	C	T	C	T	-0.106072	-0.0375706	0.351721	0.616082	FALSE	FALSE	FALSE	43308133	0.123631	0.0244011	reported	textfile	17	41385485	0.0232711	5.16155e-06	7738	TRUE	reported	textfile	0.00267778	20.7709	21.8279
	rs80228534	T	G	T	G	-0.106306	-0.0375805	0.352315	0.616009	FALSE	FALSE	FALSE	43318124	0.123511	0.0243998	reported	textfile	17	41395491	0.0232863	4.99057e-06	7738	TRUE	reported	textfile	0.00268607	20.8354	21.8279
	rs8051278	C	T	C	T	-0.180359	0.110249	0.0824954	0.910096	FALSE	FALSE	FALSE	12004405	0.00906108	0.0422453	reported	textfile	16	12098262	0.0405778	8.79873e-06	7738	TRUE	reported	textfile	0.00254661	19.7509	21.8279
	rs8070085	G	A	G	A	-0.107266	-0.0355384	0.351005	0.616004	FALSE	FALSE	FALSE	43189967	0.143244	0.0242779	reported	textfile	17	41341984	0.0233334	4.2843e-06	7738	TRUE	reported	textfile	0.00272367	21.1279	21.8279
	rs8070179	A	G	A	G	-0.102658	-0.0353029	0.353603	0.615043	FALSE	FALSE	FALSE	43050671	0.145922	0.0242784	reported	textfile	17	41202688	0.0231866	9.53367e-06	7738	TRUE	reported	textfile	0.00252688	19.5974	21.8279
	rs8074136	C	A	C	A	-0.107257	-0.0355384	0.351011	0.616004	FALSE	FALSE	FALSE	43190296	0.143244	0.0242779	reported	textfile	17	41342313	0.0233332	4.29101e-06	7738	TRUE	reported	textfile	0.00272326	21.1247	21.8279
	rs8176077	C	T	C	T	-0.110543	-0.037312	0.347226	0.616614	FALSE	FALSE	FALSE	43124331	0.124518	0.0242903	reported	textfile	17	41276348	0.0234002	2.31238e-06	7738	TRUE	reported	textfile	0.0028757	22.3106	21.8279
	rs8176082	G	A	G	A	-0.110497	-0.0373603	0.347238	0.616699	FALSE	FALSE	FALSE	43123628	0.124054	0.0242918	reported	textfile	17	41275645	0.0233986	2.33077e-06	7738	TRUE	reported	textfile	0.00287371	22.2951	21.8279
	rs8176083	C	G	C	G	-0.110131	0.0373895	0.347254	0.383344	FALSE	TRUE	FALSE	43123134	0.12372	0.0242892	reported	textfile	17	41275151	0.0234003	2.5211e-06	7738	TRUE	reported	textfile	0.00285434	22.1444	21.8279
	rs8176086	A	G	A	G	-0.110497	-0.0373502	0.347238	0.616635	FALSE	FALSE	FALSE	43122761	0.124125	0.0242899	reported	textfile	17	41274778	0.0233986	2.33077e-06	7738	TRUE	reported	textfile	0.00287371	22.2951	21.8279
	rs8176087	A	C	A	C	-0.110141	-0.0369628	0.347135	0.616821	FALSE	FALSE	FALSE	43118649	0.128078	0.0242901	reported	textfile	17	41270666	0.0233993	2.51345e-06	7738	TRUE	reported	textfile	0.0028551	22.1503	21.8279
	rs8176088	A	G	A	G	-0.110154	-0.0372008	0.347196	0.616765	FALSE	FALSE	FALSE	43118446	0.125637	0.0242899	reported	textfile	17	41270463	0.0233969	2.50063e-06	7738	TRUE	reported	textfile	0.00285636	22.1601	21.8279
	rs8176091	T	C	T	C	-0.110114	-0.0369622	0.347141	0.616821	FALSE	FALSE	FALSE	43118260	0.128085	0.0242901	reported	textfile	17	41270277	0.0233998	2.52912e-06	7738	TRUE	reported	textfile	0.00285359	22.1385	21.8279
	rs8176092	G	T	G	T	-0.110274	-0.0369621	0.347249	0.616821	FALSE	FALSE	FALSE	43118212	0.128085	0.0242901	reported	textfile	17	41270229	0.0233936	2.43086e-06	7738	TRUE	reported	textfile	0.00286337	22.2147	21.8279
	rs8176103	A	G	A	G	-0.110303	-0.0365411	0.348399	0.616846	FALSE	FALSE	FALSE	43115033	0.132574	0.0242955	reported	textfile	17	41267050	0.0234158	2.46945e-06	7738	TRUE	reported	textfile	0.00285946	22.1842	21.8279
	rs8176109	G	A	G	A	-0.110104	-0.0373144	0.347178	0.616688	FALSE	FALSE	FALSE	43113759	0.124591	0.0242967	reported	textfile	17	41265776	0.0233965	2.52616e-06	7738	TRUE	reported	textfile	0.00285387	22.1407	21.8279
	rs8176114	G	A	G	A	-0.109737	-0.0361305	0.346826	0.617159	FALSE	FALSE	FALSE	43112347	0.137001	0.0242967	reported	textfile	17	41264364	0.0233965	2.72804e-06	7738	TRUE	reported	textfile	0.00283493	21.9934	21.8279
	rs8176117	C	T	C	T	-0.10992	-0.0356212	0.346916	0.617023	FALSE	FALSE	FALSE	43111549	0.142606	0.0242957	reported	textfile	17	41263566	0.0233956	2.62313e-06	7738	TRUE	reported	textfile	0.00284459	22.0685	21.8279
	rs8176120	T	C	T	C	-0.10993	-0.0368028	0.347125	0.616834	FALSE	FALSE	FALSE	43109216	0.129727	0.0242894	reported	textfile	17	41261233	0.0233943	2.61421e-06	7738	TRUE	reported	textfile	0.00284542	22.075	21.8279
	rs8176126	T	C	T	C	-0.110181	-0.0367674	0.347125	0.617026	FALSE	FALSE	FALSE	43107032	0.130237	0.0242983	reported	textfile	17	41259049	0.0233944	2.48033e-06	7738	TRUE	reported	textfile	0.00285837	22.1757	21.8279
	rs8176130	T	C	T	C	-0.110181	-0.0368281	0.347125	0.616715	FALSE	FALSE	FALSE	43106026	0.129502	0.0242918	reported	textfile	17	41258043	0.0233944	2.48033e-06	7738	TRUE	reported	textfile	0.00285837	22.1757	21.8279
	rs8176133	C	A	C	A	-0.110054	-0.0366798	0.347076	0.616813	FALSE	FALSE	FALSE	43105441	0.131016	0.0242895	reported	textfile	17	41257458	0.0233965	2.55264e-06	7738	TRUE	reported	textfile	0.00285129	22.1206	21.8279
	rs8176140	A	T	A	T	-0.109837	0.0360206	0.34688	0.382856	FALSE	TRUE	FALSE	43099629	0.138201	0.0242968	reported	textfile	17	41251646	0.023391	2.65675e-06	7738	TRUE	reported	textfile	0.00284142	22.0439	21.8279
	rs8176141	G	C	G	C	-0.110012	0.0366937	0.347105	0.383182	FALSE	TRUE	FALSE	43099478	0.130869	0.0242895	reported	textfile	17	41251495	0.0233923	2.56454e-06	7738	TRUE	reported	textfile	0.00285014	22.1117	21.8279
	rs8176145	G	A	G	A	-0.11068	-0.036009	0.346582	0.61714	FALSE	FALSE	FALSE	43097077	0.13833	0.0242969	reported	textfile	17	41249094	0.0234059	2.25933e-06	7738	TRUE	reported	textfile	0.00288141	22.355	21.8279
	rs8176147	T	C	T	C	-0.109816	-0.0361971	0.346771	0.617383	FALSE	FALSE	FALSE	43096147	0.136489	0.0243098	reported	textfile	17	41248164	0.0233957	2.6812e-06	7738	TRUE	reported	textfile	0.0028392	22.0266	21.8279
	rs8176160	C	T	C	T	-0.111115	-0.0366822	0.347064	0.616662	FALSE	FALSE	FALSE	43089486	0.131091	0.0242958	reported	textfile	17	41241503	0.0233742	1.99673e-06	7738	TRUE	reported	textfile	0.0029119	22.5923	21.8279
	rs8176161	A	C	A	C	-0.111053	-0.036702	0.347094	0.616795	FALSE	FALSE	FALSE	43089373	0.130795	0.0242903	reported	textfile	17	41241390	0.0233715	2.01758e-06	7738	TRUE	reported	textfile	0.00290933	22.5723	21.8279
	rs8176168	G	A	G	A	-0.111272	-0.0368025	0.346975	0.616833	FALSE	FALSE	FALSE	43087611	0.12973	0.0242894	reported	textfile	17	41239628	0.0233839	1.95052e-06	7738	TRUE	reported	textfile	0.0029177	22.6374	21.8279
	rs8176170	C	T	C	T	-0.111133	-0.0368025	0.347112	0.616833	FALSE	FALSE	FALSE	43087474	0.12973	0.0242894	reported	textfile	17	41239491	0.0233774	1.99577e-06	7738	TRUE	reported	textfile	0.00291205	22.5934	21.8279
	rs8176171	A	G	A	G	-0.1111	-0.0368025	0.347039	0.616833	FALSE	FALSE	FALSE	43087455	0.12973	0.0242894	reported	textfile	17	41239472	0.0233798	2.01451e-06	7738	TRUE	reported	textfile	0.00290973	22.5753	21.8279
	rs8176193	T	C	T	C	-0.112957	-0.0368025	0.346361	0.616833	FALSE	FALSE	FALSE	43079499	0.12973	0.0242894	reported	textfile	17	41231516	0.0233765	1.35114e-06	7738	TRUE	reported	textfile	0.00300836	23.3429	21.8279
	rs8176194	C	A	C	A	-0.110995	-0.036842	0.347051	0.6169	FALSE	FALSE	FALSE	43079204	0.129379	0.0242932	reported	textfile	17	41231221	0.023374	2.04786e-06	7738	TRUE	reported	textfile	0.00290568	22.5439	21.8279
	rs8176200	G	A	G	A	-0.112305	-0.0368026	0.346134	0.616833	FALSE	FALSE	FALSE	43078359	0.129729	0.0242894	reported	textfile	17	41230376	0.0233747	1.55114e-06	7738	TRUE	reported	textfile	0.00297429	23.0778	21.8279
	rs8176201	G	A	G	A	-0.112653	-0.0368026	0.346187	0.616833	FALSE	FALSE	FALSE	43078319	0.129729	0.0242894	reported	textfile	17	41230336	0.0233759	1.44129e-06	7738	TRUE	reported	textfile	0.00299239	23.2186	21.8279
	rs8176202	A	G	A	G	-0.112524	-0.0368026	0.346176	0.616833	FALSE	FALSE	FALSE	43078211	0.129729	0.0242894	reported	textfile	17	41230228	0.0233791	1.48655e-06	7738	TRUE	reported	textfile	0.00298475	23.1591	21.8279
	rs8176214	C	T	C	T	-0.112694	-0.0368178	0.346266	0.61684	FALSE	FALSE	FALSE	43073822	0.129575	0.0242896	reported	textfile	17	41225839	0.0233735	1.42521e-06	7738	TRUE	reported	textfile	0.00299518	23.2403	21.8279
	rs8176216	T	A	T	A	-0.1072	0.0427024	0.3506	0.379051	FALSE	TRUE	FALSE	43073764	0.0802805	0.0244145	reported	textfile	17	41225781	0.0233899	4.58015e-06	7738	TRUE	reported	textfile	0.00270724	21.0001	21.8279
	rs8176220	G	A	G	A	-0.112101	-0.0368027	0.347082	0.616833	FALSE	FALSE	FALSE	43070445	0.129728	0.0242894	reported	textfile	17	41222462	0.0233671	1.6075e-06	7738	TRUE	reported	textfile	0.00296545	23.009	21.8279
	rs8176231	G	A	G	A	-0.112938	-0.0368742	0.347011	0.617126	FALSE	FALSE	FALSE	43068206	0.129076	0.0242952	reported	textfile	17	41220223	0.0233668	1.34314e-06	7738	TRUE	reported	textfile	0.00300984	23.3544	21.8279
	rs8176233	C	T	C	T	-0.112815	-0.0371032	0.347034	0.617025	FALSE	FALSE	FALSE	43067787	0.126837	0.0243029	reported	textfile	17	41219804	0.0233635	1.37423e-06	7738	TRUE	reported	textfile	0.00300416	23.3102	21.8279
	rs8176234	C	T	C	T	-0.112848	-0.0366825	0.347046	0.616919	FALSE	FALSE	FALSE	43067763	0.131056	0.0242938	reported	textfile	17	41219780	0.0233644	1.366e-06	7738	TRUE	reported	textfile	0.00300568	23.322	21.8279
	rs8176242	T	C	T	C	-0.112142	-0.036793	0.346855	0.61683	FALSE	FALSE	FALSE	43065857	0.129831	0.0242895	reported	textfile	17	41217874	0.0233855	1.6236e-06	7738	TRUE	reported	textfile	0.00296296	22.9896	21.8279
	rs8176265	T	C	T	C	-0.112376	-0.0368049	0.346902	0.616835	FALSE	FALSE	FALSE	43061979	0.129705	0.0242894	reported	textfile	17	41213996	0.0233798	1.53554e-06	7738	TRUE	reported	textfile	0.00297675	23.0969	21.8279
	rs8176268	C	T	C	T	-0.112971	-0.0369369	0.346908	0.616802	FALSE	FALSE	FALSE	43061643	0.128334	0.0242893	reported	textfile	17	41213660	0.0233716	1.34032e-06	7738	TRUE	reported	textfile	0.00301036	23.3585	21.8279
	rs8176269	T	G	T	G	-0.112189	-0.036784	0.346729	0.61713	FALSE	FALSE	FALSE	43061609	0.129977	0.0242928	reported	textfile	17	41213626	0.0233849	1.60676e-06	7738	TRUE	reported	textfile	0.00296559	23.01	21.8279
	rs8176273	G	A	G	A	-0.112742	-0.0368549	0.346925	0.616906	FALSE	FALSE	FALSE	43059636	0.129244	0.0242931	reported	textfile	17	41211653	0.0233749	1.4127e-06	7738	TRUE	reported	textfile	0.00299736	23.2573	21.8279
	rs8176282	C	T	C	T	-0.113277	-0.0371236	0.347248	0.616858	FALSE	FALSE	FALSE	43057561	0.126498	0.0242946	reported	textfile	17	41209578	0.0233699	1.25254e-06	7738	TRUE	reported	textfile	0.00302708	23.4886	21.8279
	rs8176289	C	T	C	T	-0.112193	-0.036731	0.346927	0.616813	FALSE	FALSE	FALSE	43054039	0.130478	0.0242895	reported	textfile	17	41206056	0.0233759	1.59052e-06	7738	TRUE	reported	textfile	0.00296808	23.0294	21.8279
	rs8176290	A	G	A	G	-0.112197	-0.036731	0.346969	0.616813	FALSE	FALSE	FALSE	43053755	0.130478	0.0242895	reported	textfile	17	41205772	0.0233747	1.58741e-06	7738	TRUE	reported	textfile	0.00296859	23.0334	21.8279
	rs8176296	C	T	C	T	-0.112367	-0.0368031	0.346862	0.616834	FALSE	FALSE	FALSE	43051574	0.129725	0.0242895	reported	textfile	17	41203591	0.0233834	1.54419e-06	7738	TRUE	reported	textfile	0.00297536	23.0861	21.8279
	rs8176297	A	T	A	T	-0.11234	0.0368031	0.346844	0.383166	FALSE	TRUE	FALSE	43051308	0.129725	0.0242895	reported	textfile	17	41203325	0.0233797	1.54736e-06	7738	TRUE	reported	textfile	0.00297487	23.0823	21.8279
	rs8176314	G	A	G	A	-0.112158	-0.0365396	0.346963	0.616937	FALSE	FALSE	FALSE	43046604	0.132577	0.0242947	reported	textfile	17	41198621	0.0233784	1.60661e-06	7738	TRUE	reported	textfile	0.0029656	23.0101	21.8279
	rs8176318	A	C	A	C	-0.112309	-0.0365317	0.346795	0.616944	FALSE	FALSE	FALSE	43045257	0.132531	0.0242865	reported	textfile	17	41197274	0.0233878	1.57069e-06	7738	TRUE	reported	textfile	0.00297118	23.0536	21.8279
	rs8176322	G	A	G	A	-0.111956	-0.0368026	0.346826	0.616833	FALSE	FALSE	FALSE	43043756	0.12973	0.0242895	reported	textfile	17	41195773	0.0233775	1.67591e-06	7738	TRUE	reported	textfile	0.00295518	22.9291	21.8279
	rs8176323	C	G	C	G	-0.112169	0.0369403	0.34688	0.383404	FALSE	TRUE	FALSE	43043694	0.12838	0.0242945	reported	textfile	17	41195711	0.0233809	1.60687e-06	7738	TRUE	reported	textfile	0.00296555	23.0097	21.8279
	rs8482	G	A	G	A	-0.107354	-0.0355846	0.350981	0.616135	FALSE	FALSE	FALSE	43209941	0.142757	0.0242799	reported	textfile	17	41361960	0.023335	4.21376e-06	7738	TRUE	reported	textfile	0.00272776	21.1597	21.8279
	rs915945	T	C	T	C	-0.115999	-0.037555	0.345698	0.618154	FALSE	FALSE	FALSE	43027847	0.122481	0.0243162	reported	textfile	17	41179864	0.0235032	7.99595e-07	7738	TRUE	reported	textfile	0.00313806	24.3524	21.8279
	rs9472115	A	G	A	G	0.135366	-0.0498431	0.82865	0.207663	FALSE	FALSE	FALSE	43729450	0.0845065	0.0288926	reported	textfile	6	43697187	0.0291289	3.36558e-06	7738	TRUE	reported	textfile	0.00278312	21.5903	21.8279
	rs9646412	T	A	T	A	-0.108222	0.0377369	0.350773	0.383978	FALSE	TRUE	FALSE	43348525	0.121984	0.0244015	reported	textfile	17	41425893	0.0233285	3.5001e-06	7738	TRUE	reported	textfile	0.00277346	21.5152	21.8279
	rs9646413	G	A	G	A	-0.108267	-0.0376562	0.351417	0.615988	FALSE	FALSE	FALSE	43348789	0.122725	0.0243976	reported	textfile	17	41426157	0.0233297	3.47216e-06	7738	TRUE	reported	textfile	0.00277548	21.5309	21.8279
	rs9646414	C	A	C	A	-0.108198	-0.0377867	0.350844	0.616059	FALSE	FALSE	FALSE	43346665	0.121503	0.0244022	reported	textfile	17	41424033	0.0233296	3.52111e-06	7738	TRUE	reported	textfile	0.00277198	21.5036	21.8279
	rs9646415	A	G	A	G	-0.10823	-0.0376764	0.350767	0.615998	FALSE	FALSE	FALSE	43346684	0.122528	0.0243979	reported	textfile	17	41424052	0.0233293	3.4972e-06	7738	TRUE	reported	textfile	0.00277368	21.5169	21.8279
	rs9646416	A	C	A	C	-0.108338	-0.0376207	0.350785	0.615979	FALSE	FALSE	FALSE	43346733	0.123095	0.0243987	reported	textfile	17	41424101	0.0233311	3.42531e-06	7738	TRUE	reported	textfile	0.00277878	21.5565	21.8279
	rs9646417	A	G	A	G	-0.108299	-0.037756	0.350754	0.616034	FALSE	FALSE	FALSE	43346885	0.121739	0.0243979	reported	textfile	17	41424253	0.0233303	3.45104e-06	7738	TRUE	reported	textfile	0.00277697	21.5425	21.8279
	rs9646418	G	A	G	A	-0.109468	-0.0379429	0.351793	0.61604	FALSE	FALSE	FALSE	43348533	0.119939	0.0244001	reported	textfile	17	41425901	0.0233133	2.65926e-06	7738	TRUE	reported	textfile	0.0028412	22.0422	21.8279
	rs9675026	C	T	C	T	-0.108718	-0.0376077	0.350702	0.61601	FALSE	FALSE	FALSE	43337655	0.123213	0.024398	reported	textfile	17	41415023	0.0233304	3.16308e-06	7738	TRUE	reported	textfile	0.00279842	21.7093	21.8279
	rs9675035	T	A	T	A	-0.108718	0.0376077	0.350702	0.38399	FALSE	TRUE	FALSE	43337648	0.123213	0.024398	reported	textfile	17	41415016	0.0233304	3.16308e-06	7738	TRUE	reported	textfile	0.00279842	21.7093	21.8279
	rs9832882	A	G	A	G	-0.0994659	-0.0378307	0.562188	0.476364	FALSE	FALSE	FALSE	105680632	0.10699	0.02347	reported	textfile	3	105399476	0.0222114	7.52922e-06	7738	TRUE	reported	textfile	0.0025849	20.0486	21.8279
	rs9897425	G	C	G	C	-0.1082	0.0377346	0.351435	0.383987	FALSE	TRUE	FALSE	43352811	0.121964	0.0243988	reported	textfile	17	41430179	0.0233309	3.5246e-06	7738	TRUE	reported	textfile	0.00277177	21.502	21.8279
	rs9912203	A	G	A	G	-0.107712	-0.0391849	0.352108	0.612042	FALSE	FALSE	FALSE	43367777	0.107718	0.0243606	reported	textfile	17	41445145	0.023292	3.7563e-06	7738	TRUE	reported	textfile	0.00275605	21.3797	21.8279
	rs9915489	T	A	T	A	-0.106924	0.0344223	0.355353	0.389667	FALSE	TRUE	FALSE	43021209	0.155871	0.0242565	reported	textfile	17	41173226	0.0233557	4.69299e-06	7738	TRUE	reported	textfile	0.00270123	20.9533	21.8279
	rs9939420	G	A	G	A	-0.181884	0.112135	0.0825379	0.910313	FALSE	FALSE	FALSE	12006110	0.00808332	0.042338	reported	textfile	16	12099967	0.0405889	7.42523e-06	7738	TRUE	reported	textfile	0.00258833	20.0753	21.8279
	rs9952350	C	A	C	A	0.102189	0.00164423	0.444576	0.595614	FALSE	FALSE	FALSE	5292984	0.94514	0.0238947	reported	textfile	18	5292983	0.0221477	3.95075e-06	7738	TRUE	reported	textfile	0.00274365	21.2833	21.8279
	rs9957998	G	A	G	A	0.102662	0.00150666	0.444744	0.595654	FALSE	FALSE	FALSE	5294187	0.949729	0.0238973	reported	textfile	18	5294186	0.0221672	3.63421e-06	7738	TRUE	reported	textfile	0.00276418	21.443	21.8279
GCST90027479	rs10057878	G	C	G	C	0.0766984	0.0381455	0.563331	0.582978	FALSE	TRUE	TRUE	74100063	0.109549	0.0238377	reported	textfile	5	73395888	0.0166866	4.29823e-06	7738	TRUE	reported	textfile	0.00272285	21.1215	20.8592
	rs10063644	G	A	G	A	0.0761584	-0.0376104	0.562487	0.417227	FALSE	FALSE	FALSE	74099294	0.114509	0.0238305	reported	textfile	5	73395119	0.0166775	4.95872e-06	7738	TRUE	reported	textfile	0.00268767	20.8479	20.8592
	rs10065712	A	T	A	T	0.0760897	0.0381482	0.562451	0.582978	FALSE	TRUE	TRUE	74099964	0.109524	0.0238376	reported	textfile	5	73395789	0.0166784	5.06267e-06	7738	TRUE	reported	textfile	0.00268255	20.808	20.8592
	rs10082638	C	T	C	T	-0.0730021	-0.0179046	0.511152	0.418485	FALSE	FALSE	FALSE	24896400	0.455727	0.024004	reported	textfile	11	24917946	0.0163104	7.61255e-06	7738	TRUE	reported	textfile	0.0025822	20.0276	20.8592
	rs10082639	C	T	C	T	-0.0756845	-0.0177303	0.518305	0.41732	FALSE	FALSE	FALSE	24896432	0.460394	0.0240184	reported	textfile	11	24917978	0.0163787	3.82059e-06	7738	TRUE	reported	textfile	0.00275188	21.3473	20.8592
	rs10160304	A	C	A	C	0.0769204	-0.000743869	0.544743	0.494635	FALSE	FALSE	FALSE	25029620	0.974796	0.0235445	reported	textfile	11	25051166	0.0163197	2.43686e-06	7738	TRUE	reported	textfile	0.00286276	22.2099	20.8592
	rs1031208	T	C	T	C	-0.0744561	0.00102362	0.451436	0.506483	FALSE	FALSE	FALSE	25020405	0.965323	0.0235451	reported	textfile	11	25041951	0.0163253	5.09612e-06	7738	TRUE	reported	textfile	0.00268092	20.7953	20.8592
	rs10423929	T	C	T	C	-0.0942771	0.0109688	0.241406	0.776237	FALSE	FALSE	FALSE	48833306	0.703105	0.0287796	reported	textfile	19	49336563	0.0208513	6.14342e-06	7738	TRUE	reported	textfile	0.00263495	20.4378	20.8592
	rs10520466	C	T	C	T	0.135971	-0.000417507	0.077256	0.885548	FALSE	FALSE	FALSE	181150932	0.991124	0.03753	reported	textfile	4	182072085	0.0307593	9.84782e-06	7738	TRUE	reported	textfile	0.00251893	19.5356	20.8592
	rs10741469	T	C	T	C	0.0768959	0.0295308	0.410553	0.642145	FALSE	FALSE	FALSE	93649021	0.228218	0.0245077	reported	textfile	11	93382187	0.0165514	3.38618e-06	7738	TRUE	reported	textfile	0.00278162	21.5787	20.8592
	rs10742053	T	C	T	C	-0.0725113	-0.0202766	0.501119	0.443545	FALSE	FALSE	FALSE	24900144	0.395038	0.0238403	reported	textfile	11	24921690	0.0163633	9.36548e-06	7738	TRUE	reported	textfile	0.00253128	19.6317	20.8592
	rs10742054	T	C	T	C	-0.0731824	-0.0156269	0.503336	0.42082	FALSE	FALSE	FALSE	24901759	0.514758	0.0239881	reported	textfile	11	24923305	0.0163694	7.7974e-06	7738	TRUE	reported	textfile	0.00257631	19.9818	20.8592
	rs10742055	A	C	A	C	-0.0748531	-0.0175247	0.519937	0.418255	FALSE	FALSE	FALSE	24905679	0.465581	0.0240167	reported	textfile	11	24927225	0.0164567	5.40294e-06	7738	TRUE	reported	textfile	0.00266653	20.6834	20.8592
	rs10742059	T	C	T	C	-0.0747534	-0.00377121	0.45178	0.51118	FALSE	FALSE	FALSE	24970263	0.872928	0.0235787	reported	textfile	11	24991809	0.0164642	5.61565e-06	7738	TRUE	reported	textfile	0.00265703	20.6095	20.8592
	rs10765619	G	A	G	A	0.0775765	0.0294461	0.410443	0.642215	FALSE	FALSE	FALSE	93648851	0.229526	0.0245061	reported	textfile	11	93382017	0.0165905	2.9259e-06	7738	TRUE	reported	textfile	0.00281765	21.8589	20.8592
	rs10765623	A	G	A	G	0.0747792	0.0285596	0.425853	0.635344	FALSE	FALSE	FALSE	93671758	0.242362	0.0244287	reported	textfile	11	93404924	0.0165126	5.93718e-06	7738	TRUE	reported	textfile	0.00264334	20.503	20.8592
	rs10767272	T	C	T	C	-0.0723576	-0.0200436	0.501076	0.443774	FALSE	FALSE	FALSE	24898545	0.400448	0.0238382	reported	textfile	11	24920091	0.0163623	9.769e-06	7738	TRUE	reported	textfile	0.00252089	19.5509	20.8592
	rs10767273	T	C	T	C	-0.0732541	-0.0168358	0.511274	0.418896	FALSE	FALSE	FALSE	24901197	0.483055	0.0240032	reported	textfile	11	24922743	0.0163081	7.06009e-06	7738	TRUE	reported	textfile	0.00260074	20.1718	20.8592
	rs10767274	A	G	A	G	-0.0732983	-0.0172077	0.511326	0.419527	FALSE	FALSE	FALSE	24901769	0.473743	0.0240196	reported	textfile	11	24923315	0.01631	6.98731e-06	7738	TRUE	reported	textfile	0.00260327	20.1915	20.8592
	rs10767275	T	C	T	C	-0.0752181	-0.0160479	0.519874	0.417594	FALSE	FALSE	FALSE	24904439	0.504052	0.0240192	reported	textfile	11	24925985	0.0164595	4.88011e-06	7738	TRUE	reported	textfile	0.00269161	20.8785	20.8592
	rs10767282	G	A	G	A	-0.0748813	-0.00304034	0.45146	0.510803	FALSE	FALSE	FALSE	24954310	0.897401	0.0235786	reported	textfile	11	24975856	0.0164711	5.46198e-06	7738	TRUE	reported	textfile	0.00266388	20.6628	20.8592
	rs10767288	G	C	G	C	-0.0746599	0.00434402	0.451599	0.488409	FALSE	TRUE	TRUE	24970123	0.853841	0.0235806	reported	textfile	11	24991669	0.0164699	5.81246e-06	7738	TRUE	reported	textfile	0.00264858	20.5438	20.8592
	rs10767289	C	T	C	T	-0.0746599	-0.00392304	0.451599	0.511224	FALSE	FALSE	FALSE	24970176	0.867852	0.0235777	reported	textfile	11	24991722	0.0164699	5.81246e-06	7738	TRUE	reported	textfile	0.00264858	20.5438	20.8592
	rs10767297	C	G	C	G	-0.075401	-0.00129588	0.451157	0.493651	FALSE	TRUE	TRUE	25011234	0.95613	0.023557	reported	textfile	11	25032780	0.0164172	4.37321e-06	7738	TRUE	reported	textfile	0.0027186	21.0884	20.8592
	rs10767299	A	G	A	G	-0.075405	0.0010335	0.451163	0.506386	FALSE	FALSE	FALSE	25016070	0.965006	0.0235569	reported	textfile	11	25037616	0.0164176	4.37039e-06	7738	TRUE	reported	textfile	0.00271875	21.0896	20.8592
	rs10767301	T	A	T	A	-0.0743811	-0.00109492	0.45138	0.493549	FALSE	TRUE	TRUE	25032384	0.962906	0.0235428	reported	textfile	11	25053930	0.0163262	5.21495e-06	7738	TRUE	reported	textfile	0.00267524	20.7512	20.8592
	rs10767302	T	G	T	G	0.0743182	-0.00109632	0.548488	0.49355	FALSE	FALSE	FALSE	25032688	0.962859	0.0235435	reported	textfile	11	25054234	0.0163192	5.26235e-06	7738	TRUE	reported	textfile	0.00267302	20.7339	20.8592
	rs1080367	A	C	A	C	0.0750652	0.028956	0.426104	0.634991	FALSE	FALSE	FALSE	93714161	0.235958	0.0244324	reported	textfile	11	93447327	0.0165728	5.91466e-06	7738	TRUE	reported	textfile	0.00264428	20.5104	20.8592
	rs10831082	C	A	C	A	0.0755935	0.026422	0.422786	0.636437	FALSE	FALSE	FALSE	93647882	0.279175	0.0244156	reported	textfile	11	93381048	0.0164847	4.52522e-06	7738	TRUE	reported	textfile	0.00271019	21.023	20.8592
	rs10831083	G	A	G	A	0.074548	0.027116	0.42318	0.636409	FALSE	FALSE	FALSE	93657901	0.266947	0.0244262	reported	textfile	11	93391067	0.0164515	5.85976e-06	7738	TRUE	reported	textfile	0.00264656	20.5281	20.8592
	rs10831090	C	A	C	A	0.0750751	0.0287124	0.425817	0.635346	FALSE	FALSE	FALSE	93681920	0.239858	0.024429	reported	textfile	11	93415086	0.0165388	5.64365e-06	7738	TRUE	reported	textfile	0.00265583	20.6002	20.8592
	rs10834531	G	A	G	A	-0.0720911	-0.0233522	0.512878	0.432188	FALSE	FALSE	FALSE	24891134	0.328194	0.0238834	reported	textfile	11	24912680	0.016274	9.4304e-06	7738	TRUE	reported	textfile	0.00252957	19.6183	20.8592
	rs10834534	T	C	T	C	-0.0741663	-0.0220362	0.530538	0.40707	FALSE	FALSE	FALSE	24894153	0.360305	0.0240889	reported	textfile	11	24915699	0.0162817	5.23396e-06	7738	TRUE	reported	textfile	0.00267437	20.7444	20.8592
	rs10834535	A	C	A	C	-0.0760183	-0.0176732	0.518048	0.417319	FALSE	FALSE	FALSE	24896915	0.461853	0.024019	reported	textfile	11	24918461	0.0163644	3.39508e-06	7738	TRUE	reported	textfile	0.00278098	21.5737	20.8592
	rs10834537	G	A	G	A	-0.0761138	-0.0169713	0.518124	0.417743	FALSE	FALSE	FALSE	24898562	0.479746	0.0240145	reported	textfile	11	24920108	0.0163644	3.30058e-06	7738	TRUE	reported	textfile	0.00278795	21.6279	20.8592
	rs10834538	G	A	G	A	-0.0725918	-0.0209684	0.500889	0.443656	FALSE	FALSE	FALSE	24899597	0.379096	0.0238395	reported	textfile	11	24921143	0.016363	9.1504e-06	7738	TRUE	reported	textfile	0.00253698	19.676	20.8592
	rs10834540	T	C	T	C	-0.0733123	-0.0163509	0.503089	0.420936	FALSE	FALSE	FALSE	24901071	0.495468	0.0239877	reported	textfile	11	24922617	0.0163694	7.51294e-06	7738	TRUE	reported	textfile	0.00258544	20.0528	20.8592
	rs10834541	T	C	T	C	-0.0733123	-0.0163496	0.503089	0.420936	FALSE	FALSE	FALSE	24901076	0.495504	0.0239877	reported	textfile	11	24922622	0.0163694	7.51294e-06	7738	TRUE	reported	textfile	0.00258544	20.0528	20.8592
	rs10834542	T	C	T	C	-0.0732136	-0.0165346	0.503015	0.420829	FALSE	FALSE	FALSE	24902745	0.490754	0.0239942	reported	textfile	11	24924291	0.0164418	8.47208e-06	7738	TRUE	reported	textfile	0.0025559	19.8231	20.8592
	rs10834543	G	A	G	A	-0.0753018	-0.0157187	0.520035	0.417675	FALSE	FALSE	FALSE	24904535	0.512955	0.0240257	reported	textfile	11	24926081	0.0164576	4.75094e-06	7738	TRUE	reported	textfile	0.00269821	20.9298	20.8592
	rs10834558	T	C	T	C	-0.0745188	-0.00320705	0.451396	0.510893	FALSE	FALSE	FALSE	24964661	0.891819	0.0235806	reported	textfile	11	24986207	0.0164725	6.07337e-06	7738	TRUE	reported	textfile	0.00263777	20.4598	20.8592
	rs10834562	G	A	G	A	-0.0752686	-0.00371696	0.449189	0.511403	FALSE	FALSE	FALSE	24979408	0.874739	0.0235786	reported	textfile	11	25000954	0.0164858	4.97909e-06	7738	TRUE	reported	textfile	0.00268665	20.8399	20.8592
	rs10834582	T	C	T	C	0.0743646	-0.00101945	0.548366	0.493508	FALSE	FALSE	FALSE	25028112	0.965464	0.0235447	reported	textfile	11	25049658	0.0163186	5.18812e-06	7738	TRUE	reported	textfile	0.00267654	20.7613	20.8592
	rs10834584	A	G	A	G	-0.0745133	0.00115092	0.451338	0.50644	FALSE	FALSE	FALSE	25030545	0.96101	0.023543	reported	textfile	11	25052091	0.0163258	5.01534e-06	7738	TRUE	reported	textfile	0.00268486	20.826	20.8592
	rs10834587	C	G	C	G	-0.0757429	-0.00128966	0.452123	0.493612	FALSE	TRUE	TRUE	25038897	0.956322	0.0235469	reported	textfile	11	25060443	0.01634	3.56189e-06	7738	TRUE	reported	textfile	0.00276915	21.4816	20.8592
	rs10834588	G	A	G	A	-0.0756522	0.00126253	0.452093	0.506318	FALSE	FALSE	FALSE	25042026	0.957259	0.0235575	reported	textfile	11	25063572	0.0163404	3.66067e-06	7738	TRUE	reported	textfile	0.00276241	21.4292	20.8592
	rs11020479	G	A	G	A	0.0750264	0.0287106	0.425815	0.635353	FALSE	FALSE	FALSE	93676396	0.23988	0.0244286	reported	textfile	11	93409562	0.0165163	5.55738e-06	7738	TRUE	reported	textfile	0.00265961	20.6296	20.8592
	rs11028255	C	T	C	T	-0.073658	-0.0209271	0.530765	0.406824	FALSE	FALSE	FALSE	24894606	0.385182	0.0240988	reported	textfile	11	24916152	0.0162994	6.21141e-06	7738	TRUE	reported	textfile	0.00263223	20.4166	20.8592
	rs11028257	C	A	C	A	-0.074369	-0.0210591	0.530124	0.406887	FALSE	FALSE	FALSE	24894660	0.382001	0.0240891	reported	textfile	11	24916206	0.0162946	5.01822e-06	7738	TRUE	reported	textfile	0.00268473	20.825	20.8592
	rs11028260	A	T	A	T	-0.0756438	0.0189039	0.531144	0.593702	FALSE	TRUE	TRUE	24895043	0.432603	0.0240893	reported	textfile	11	24916589	0.0163193	3.56525e-06	7738	TRUE	reported	textfile	0.00276892	21.4799	20.8592
	rs11028291	T	C	T	C	0.0732723	-0.00325297	0.530869	0.507542	FALSE	FALSE	FALSE	24947547	0.890258	0.0235761	reported	textfile	11	24969093	0.016376	7.66355e-06	7738	TRUE	reported	textfile	0.00258055	20.0148	20.8592
	rs11028307	C	A	C	A	-0.0747132	-0.00347479	0.451524	0.510911	FALSE	FALSE	FALSE	24966999	0.88284	0.0235786	reported	textfile	11	24988545	0.0164716	5.73601e-06	7738	TRUE	reported	textfile	0.0026518	20.5689	20.8592
	rs11028314	G	A	G	A	-0.0749233	-0.00356229	0.449246	0.511418	FALSE	FALSE	FALSE	24976789	0.879941	0.0235844	reported	textfile	11	24998335	0.0164958	5.57353e-06	7738	TRUE	reported	textfile	0.0026589	20.6241	20.8592
	rs11028315	A	G	A	G	-0.0748833	-0.00370372	0.449315	0.511387	FALSE	FALSE	FALSE	24977467	0.87518	0.0235781	reported	textfile	11	24999013	0.0164954	5.63482e-06	7738	TRUE	reported	textfile	0.0026562	20.6031	20.8592
	rs11028325	C	T	C	T	-0.0757928	-0.00269007	0.450896	0.510581	FALSE	FALSE	FALSE	24993548	0.909111	0.023564	reported	textfile	11	25015094	0.0164586	4.12354e-06	7738	TRUE	reported	textfile	0.00273308	21.2011	20.8592
	rs11028335	G	A	G	A	-0.0752691	0.00162218	0.451394	0.506698	FALSE	FALSE	FALSE	25006590	0.945097	0.0235562	reported	textfile	11	25028136	0.016441	4.69116e-06	7738	TRUE	reported	textfile	0.0027013	20.9539	20.8592
	rs11028336	T	C	T	C	-0.0752476	0.00163735	0.451403	0.506716	FALSE	FALSE	FALSE	25007147	0.944587	0.023557	reported	textfile	11	25028693	0.0164409	4.72041e-06	7738	TRUE	reported	textfile	0.0026998	20.9422	20.8592
	rs11028338	A	T	A	T	-0.0755527	-0.00162956	0.451374	0.493301	FALSE	TRUE	TRUE	25008159	0.944848	0.023556	reported	textfile	11	25029705	0.0164264	4.23584e-06	7738	TRUE	reported	textfile	0.00272647	21.1496	20.8592
	rs11028345	A	G	A	G	-0.0755086	0.00165166	0.451183	0.506699	FALSE	FALSE	FALSE	25009551	0.944101	0.0235557	reported	textfile	11	25031097	0.0164187	4.2462e-06	7738	TRUE	reported	textfile	0.00272584	21.1448	20.8592
	rs11028347	T	A	T	A	-0.075436	-0.00164269	0.451216	0.493296	FALSE	TRUE	TRUE	25009957	0.944403	0.0235556	reported	textfile	11	25031503	0.0164183	4.33541e-06	7738	TRUE	reported	textfile	0.00272075	21.1052	20.8592
	rs11028348	A	G	A	G	-0.075535	0.00106849	0.451197	0.506432	FALSE	FALSE	FALSE	25015167	0.963819	0.0235553	reported	textfile	11	25036713	0.0164197	4.21978e-06	7738	TRUE	reported	textfile	0.00272741	21.157	20.8592
	rs11028350	G	A	G	A	0.0754401	-0.00033343	0.548558	0.493563	FALSE	FALSE	FALSE	25018743	0.988703	0.0235495	reported	textfile	11	25040289	0.0164122	4.29467e-06	7738	TRUE	reported	textfile	0.00272306	21.1231	20.8592
	rs11028351	C	T	C	T	0.0758067	-0.00105956	0.547763	0.493552	FALSE	FALSE	FALSE	25019010	0.96411	0.0235479	reported	textfile	11	25040556	0.0164322	3.96333e-06	7738	TRUE	reported	textfile	0.00274285	21.2771	20.8592
	rs11028352	G	A	G	A	0.077622	-0.00104768	0.534748	0.493552	FALSE	FALSE	FALSE	25019067	0.964513	0.0235478	reported	textfile	11	25040613	0.0165308	2.65846e-06	7738	TRUE	reported	textfile	0.0028413	22.0429	20.8592
	rs11028353	A	C	A	C	0.0752264	-0.00105221	0.547546	0.493552	FALSE	FALSE	FALSE	25019109	0.964359	0.0235478	reported	textfile	11	25040655	0.0164287	4.67315e-06	7738	TRUE	reported	textfile	0.00270228	20.9615	20.8592
	rs11028354	C	T	C	T	0.0752485	-0.00104732	0.547549	0.493552	FALSE	FALSE	FALSE	25019117	0.964525	0.0235478	reported	textfile	11	25040663	0.016429	4.64505e-06	7738	TRUE	reported	textfile	0.00270376	20.973	20.8592
	rs11028355	T	A	T	A	0.0753466	0.00104991	0.548266	0.506449	FALSE	TRUE	TRUE	25019154	0.964437	0.0235477	reported	textfile	11	25040700	0.0164132	4.41947e-06	7738	TRUE	reported	textfile	0.00271601	21.0683	20.8592
	rs11028356	G	A	G	A	-0.0743605	0.00109008	0.451496	0.506452	FALSE	FALSE	FALSE	25023895	0.96307	0.0235429	reported	textfile	11	25045441	0.0163213	5.21291e-06	7738	TRUE	reported	textfile	0.00267536	20.7521	20.8592
	rs11028360	T	C	T	C	0.0767525	-0.000733879	0.54475	0.494635	FALSE	FALSE	FALSE	25025735	0.975134	0.0235446	reported	textfile	11	25047281	0.0163202	2.56472e-06	7738	TRUE	reported	textfile	0.00285014	22.1117	20.8592
	rs11028361	A	G	A	G	0.076928	-0.000631646	0.54473	0.494604	FALSE	FALSE	FALSE	25028202	0.978597	0.0235448	reported	textfile	11	25049748	0.0163194	2.43019e-06	7738	TRUE	reported	textfile	0.00286343	22.2151	20.8592
	rs11028362	A	G	A	G	0.0767586	-0.0015295	0.544759	0.494939	FALSE	FALSE	FALSE	25028307	0.948216	0.0235501	reported	textfile	11	25049853	0.0163198	2.55882e-06	7738	TRUE	reported	textfile	0.00285073	22.1163	20.8592
	rs11512141	A	G	A	G	-0.0746194	-0.00348839	0.4513	0.510908	FALSE	FALSE	FALSE	24960679	0.882385	0.0235787	reported	textfile	11	24982225	0.0164717	5.894e-06	7738	TRUE	reported	textfile	0.00264513	20.517	20.8592
	rs11529070	A	C	A	C	0.0751881	0.028936	0.425995	0.635064	FALSE	FALSE	FALSE	93710462	0.236197	0.024428	reported	textfile	11	93443628	0.0165736	5.71637e-06	7738	TRUE	reported	textfile	0.00265266	20.5756	20.8592
	rs115664824	T	C	T	C	0.172619	-0.0178028	0.0546127	0.944865	FALSE	FALSE	FALSE	62733405	0.733714	0.0523321	reported	textfile	1	63199076	0.0376323	4.49645e-06	7738	TRUE	reported	textfile	0.00271174	21.035	20.8592
	rs11823079	A	G	A	G	0.0743142	-0.00111505	0.548485	0.493556	FALSE	FALSE	FALSE	25032768	0.962227	0.0235443	reported	textfile	11	25054314	0.0163193	5.26975e-06	7738	TRUE	reported	textfile	0.0026727	20.7314	20.8592
	rs1218619	T	C	T	C	-0.0781319	-0.0456957	0.696486	0.282079	FALSE	FALSE	FALSE	117258424	0.0794859	0.026057	reported	textfile	3	116977271	0.017677	9.87097e-06	7738	TRUE	reported	textfile	0.00251835	19.5311	20.8592
	rs1218620	T	A	T	A	-0.0781875	0.0459507	0.696068	0.717956	FALSE	TRUE	FALSE	117258248	0.0777983	0.026055	reported	textfile	3	116977095	0.0176821	9.78611e-06	7738	TRUE	reported	textfile	0.00252047	19.5477	20.8592
	rs1218621	A	G	A	G	-0.0782032	-0.045951	0.696443	0.282044	FALSE	FALSE	FALSE	117258099	0.0777965	0.026055	reported	textfile	3	116976946	0.0176783	9.70354e-06	7738	TRUE	reported	textfile	0.00252257	19.5639	20.8592
	rs12274531	G	A	G	A	0.0781207	-0.000659304	0.54495	0.494673	FALSE	FALSE	FALSE	25018437	0.977668	0.0235526	reported	textfile	11	25039983	0.0164131	1.93932e-06	7738	TRUE	reported	textfile	0.00291912	22.6485	20.8592
	rs12287623	A	C	A	C	0.0754798	-0.0010856	0.54861	0.493552	FALSE	FALSE	FALSE	25018187	0.963231	0.0235492	reported	textfile	11	25039733	0.0164129	4.24913e-06	7738	TRUE	reported	textfile	0.00272569	21.1436	20.8592
	rs12294585	A	T	A	T	0.074064	-0.000128948	0.539101	0.50282	FALSE	TRUE	TRUE	25018169	0.995631	0.0235501	reported	textfile	11	25039715	0.0164806	6.98924e-06	7738	TRUE	reported	textfile	0.0026032	20.1909	20.8592
	rs12360600	C	T	C	T	0.0751601	0.00344246	0.537736	0.508109	FALSE	FALSE	FALSE	25019040	0.88382	0.0235577	reported	textfile	11	25040586	0.016546	5.55904e-06	7738	TRUE	reported	textfile	0.00265952	20.6289	20.8592
	rs12364820	T	C	T	C	0.0752322	0.00344289	0.53769	0.508109	FALSE	FALSE	FALSE	25019044	0.883805	0.0235577	reported	textfile	11	25040590	0.0165478	5.45808e-06	7738	TRUE	reported	textfile	0.00266403	20.664	20.8592
	rs12366232	T	A	T	A	-0.0746599	0.00393397	0.451599	0.488777	FALSE	TRUE	TRUE	24969737	0.867488	0.0235778	reported	textfile	11	24991283	0.0164699	5.81246e-06	7738	TRUE	reported	textfile	0.00264858	20.5438	20.8592
	rs12573880	A	T	A	T	0.0752459	0.00105303	0.54847	0.506448	FALSE	TRUE	TRUE	25018869	0.964332	0.023548	reported	textfile	11	25040415	0.0164142	4.55722e-06	7738	TRUE	reported	textfile	0.00270844	21.0094	20.8592
	rs12577009	T	C	T	C	0.075364	-0.00105507	0.548535	0.493552	FALSE	FALSE	FALSE	25018824	0.964263	0.023548	reported	textfile	11	25040370	0.016413	4.39612e-06	7738	TRUE	reported	textfile	0.00271732	21.0785	20.8592
	rs12796003	T	C	T	C	-0.0747452	-0.0034649	0.45157	0.510911	FALSE	FALSE	FALSE	24968104	0.883171	0.0235786	reported	textfile	11	24989650	0.0164693	5.66709e-06	7738	TRUE	reported	textfile	0.00265481	20.5923	20.8592
[truncated: 21,958 more rows]

## Sheet: S8.2
The IVs SNPs involved in gut microbiota phenotypes to AAA of UK Biobank database.
[truncated: 23,987 more rows]

## Sheet: S8.3
The single SNP's effect estimated in gut microbiota phenotypes to AAA of FinnGen database.
[truncated: 24,066 more rows]

## Sheet: S8.4
The single SNP's effect estimated in gut microbiota phenotypes to AAA of UK Biobank database.
[truncated: 24,331 more rows]
