# Supplementary material
Source: Frontiers journal article supplement (https://www.frontiersin.org/articles/1413183)
Supplement: Table_9.xlsx [file Table_9.xlsx]

## Sheet: Content
Content
S9.1. The main meta-results for peripheral blood immune cells phenotypes.
S9.2. The main meta-results for peripheral blood immune factors phenotypes.
S9.3. The main meta-results for peripheral blood metabolites phenotypes.
S9.4. The main meta-results for gut microbiota phenotypes.

## Sheet: S9.1.
The main meta-results for peripheral blood immune cells phenotypes.
id	Random_p-value	Random_OR	Random_95lci	Random_95uci	Q	df.Q	p-value.Q	I2
GCST90001997	0.00118593	0.915387	0.864238	0.966536	0.00322103	1	0.954741	0
GCST90001614	0.00246623	1.15794	1.05569	1.26019	0.353214	1	0.552299	0
GCST90001675	0.00467455	1.05914	1.01816	1.10011	0.814111	1	0.366907	0
GCST90001575	0.00789944	1.06259	1.01641	1.10878	0.981712	1	0.321776	0
GCST90001523	0.00929565	1.04026	1.00992	1.0706	0.0202579	1	0.886819	0
GCST90001547	0.0098836	1.04636	1.01114	1.08158	0.0562726	1	0.812487	0
GCST90001995	0.012327	0.924803	0.865912	0.983694	0.113369	1	0.736341	0
GCST90002091	0.0123531	1.04403	1.00954	1.07853	0.377937	1	0.538709	0
GCST90001678	0.0129117	1.05246	1.0111	1.09381	0.0664347	1	0.7966	0
GCST90001921	0.0133979	1.05606	1.01163	1.10049	0.0401093	1	0.841267	0
GCST90001814	0.0177692	0.974862	0.954076	0.995647	0.977513	1	0.322814	0
GCST90002029	0.0178526	1.07241	1.01249	1.13232	0.00786621	1	0.929327	0
GCST90002025	0.0188876	1.06735	1.01112	1.12357	0.184046	1	0.667919	0
GCST90001763	0.0201987	0.967053	0.93925	0.994855	1.02051	1	0.312398	0.0200972
GCST90001447	0.0226945	1.05506	1.0077	1.10243	0.00979312	1	0.92117	0
GCST90002003	0.0228491	0.929481	0.868753	0.990209	0.00135704	1	0.970614	0
GCST90001875	0.023602	0.942294	0.892327	0.992261	0.101777	1	0.749707	0
GCST90001835	0.0258653	0.895886	0.804308	0.987465	0.0613356	1	0.804397	0
GCST90002120	0.0269985	0.896069	0.803961	0.988177	0.462338	1	0.496533	0
GCST90002117	0.0284636	1.087	1.00917	1.16483	2.41151	1	0.120446	0.585323
GCST90001897	0.0296722	0.964812	0.933094	0.996529	0.24288	1	0.622134	0
GCST90001893	0.0324232	0.912046	0.83146	0.992632	0.00497439	1	0.943772	0
GCST90002033	0.0351556	0.946979	0.897648	0.99631	0.315919	1	0.574071	0
GCST90001429	0.0374176	1.06383	1.00372	1.12394	1.03144	1	0.309821	0.0304812
GCST90001650	0.0408137	1.05548	1.00232	1.10865	0.00192954	1	0.964963	0
GCST90001873	0.0427349	0.955963	0.913368	0.998559	0.626519	1	0.428635	0
GCST90001766	0.043882	1.04137	1.00113	1.0816	0.172352	1	0.67803	0
GCST90001424	0.0456238	1.04067	1.00079	1.08056	0.00404087	1	0.949314	0
GCST90001497	0.0469495	1.03441	1.00046	1.06835	0.220913	1	0.638345	0
GCST90001940	0.0499835	0.925213	0.850432	0.999995	0.57763	1	0.447243	0
GCST90001980	0.0507158	1.04681	0.999854	1.09377	0.413563	1	0.520167	0
GCST90001587	0.0510276	1.08358	0.999627	1.16754	0.508259	1	0.475893	0
GCST90001967	0.0529582	0.944442	0.888174	1.00071	0.0464649	1	0.829333	0
GCST90002080	0.0588411	1.05598	0.997909	1.11405	0.272623	1	0.601578	0
GCST90001788	0.0591709	0.922336	0.841666	1.00301	0.226831	1	0.633884	0
GCST90001532	0.0593157	1.02084	0.999181	1.04249	0.0780438	1	0.779966	0
GCST90002093	0.0629733	1.05767	0.996881	1.11845	0.892638	1	0.344763	0
GCST90001412	0.0632877	1.07148	0.996043	1.14692	0.399265	1	0.527469	0
GCST90001491	0.0651128	0.972601	0.943487	1.00172	0.433974	1	0.510045	0
GCST90001615	0.0659165	1.06104	0.995985	1.12609	0.356659	1	0.550367	0
GCST90001525	0.0661118	1.03904	0.997402	1.08067	0.681962	1	0.408912	0
GCST90002069	0.0693381	0.968339	0.934173	1.00251	0.0258441	1	0.872282	0
GCST90001459	0.0728191	0.94623	0.887484	1.00498	0.431749	1	0.511132	0
GCST90001811	0.0788469	1.08083	0.990684	1.17099	1.19717	1	0.273888	0.164697
GCST90001418	0.0791225	1.02953	0.996566	1.0625	0.00162437	1	0.967851	0
GCST90002086	0.0834642	0.953229	0.90027	1.00619	0.130817	1	0.717587	0
GCST90001699	0.0834721	1.00104	0.999862	1.00222	0.434576	1	0.509752	0
GCST90001915	0.0839548	1.06516	0.99126	1.13907	0.301658	1	0.582845	0
GCST90001911	0.0842645	0.954188	0.90218	1.0062	0.0089725	1	0.924535	0
GCST90001988	0.0847947	1.04455	0.993888	1.09521	0.00115073	1	0.972939	0
GCST90001443	0.0848692	0.95934	0.913092	1.00559	0.31681	1	0.573531	0
GCST90001645	0.0906052	1.05736	0.990925	1.12379	0.410434	1	0.521749	0
GCST90001543	0.0933156	0.962577	0.918869	1.00628	0.0172237	1	0.895586	0
GCST90001756	0.0936069	1.02922	0.995063	1.06338	0.802432	1	0.370367	0
GCST90002036	0.0941333	0.970105	0.935104	1.00511	0.144511	1	0.703837	0
GCST90001907	0.0942468	0.96491	0.923811	1.00601	0.841876	1	0.358861	0
GCST90001579	0.0946888	1.03881	0.993294	1.08432	0.201446	1	0.653556	0
GCST90001772	0.0956164	1.02789	0.995088	1.0607	0.631686	1	0.426738	0
GCST90001531	0.0959351	1.02086	0.996303	1.04541	0.306342	1	0.579934	0
GCST90002075	0.0960762	1.06119	0.989124	1.13327	0.0187493	1	0.891088	0
GCST90001728	0.0972897	1.02365	0.995695	1.05161	0.353213	1	0.5523	0
GCST90001902	0.0991544	0.950008	0.890587	1.00943	0.677835	1	0.410333	0
GCST90001918	0.10426	1.04774	0.990144	1.10533	0.000698198	1	0.97892	0
GCST90001673	0.104325	1.04407	0.99089	1.09726	0.526774	1	0.467966	0
GCST90001898	0.104653	0.963524	0.919466	1.00758	0.0485636	1	0.825582	0
GCST90001891	0.107466	0.927012	0.838142	1.01588	0.000168312	1	0.989649	0
GCST90001595	0.107517	0.830912	0.625	1.03682	0.0757719	1	0.783111	0
GCST90001944	0.108121	1.02431	0.994655	1.05396	0.446673	1	0.503919	0
GCST90001991	0.108391	1.04349	0.990397	1.09659	0.00229608	1	0.961782	0
GCST90001945	0.108566	1.02428	0.994625	1.05393	0.444046	1	0.505176	0
GCST90001938	0.110106	1.071	0.983903	1.15809	0.890974	1	0.345214	0
GCST90001950	0.114495	0.965198	0.921981	1.00842	0.125435	1	0.723213	0
GCST90001707	0.11625	0.965442	0.922321	1.00856	1.72483e-07	1	0.999669	0
GCST90002040	0.117063	1.03438	0.991384	1.07738	0.0334572	1	0.854866	0
GCST90001572	0.120121	1.05229	0.986351	1.11823	0.865807	1	0.352119	0
GCST90001539	0.120291	1.05431	0.985792	1.12283	0.0312568	1	0.859669	0
GCST90001482	0.121615	1.01952	0.994805	1.04424	0.447547	1	0.503502	0
GCST90002116	0.124291	0.964684	0.919649	1.00972	0.446527	1	0.503989	0
GCST90001851	0.12895	0.969042	0.929078	1.00901	1.0766	1	0.299459	0.0711509
GCST90001439	0.130855	1.07484	0.977746	1.17193	0.000100343	1	0.992008	0
GCST90001795	0.131615	0.949178	0.883113	1.01524	0.516594	1	0.472298	0
GCST90001648	0.132002	1.07632	0.977011	1.17563	1.41314	1	0.234536	0.292354
GCST90001884	0.132855	1.03456	0.989491	1.07962	0.24051	1	0.623838	0
GCST90001477	0.135767	0.961885	0.911807	1.01196	0.823838	1	0.36406	0
GCST90001739	0.147535	1.0536	0.981062	1.12615	0.598579	1	0.439121	0
GCST90001892	0.15004	0.962203	0.910735	1.01367	0.091253	1	0.76259	0
GCST90002067	0.151101	0.906272	0.778313	1.03423	3.47308	1	0.062375	0.712071
GCST90001529	0.152904	0.955885	0.895393	1.01638	0.10004	1	0.751782	0
GCST90002014	0.155272	0.951058	0.883559	1.01856	0.0657719	1	0.797595	0
GCST90001984	0.15591	1.03758	0.985673	1.08948	0.00762841	1	0.930401	0
GCST90001822	0.159522	0.960246	0.904855	1.01564	0.00101011	1	0.974646	0
GCST90001671	0.159929	0.966528	0.919844	1.01321	0.0134304	1	0.90774	0
GCST90001549	0.160221	0.955014	0.892229	1.0178	0.0208663	1	0.885144	0
GCST90001961	0.160437	1.02711	0.989256	1.06495	0.196187	1	0.657816	0
GCST90001970	0.163553	1.07298	0.970315	1.17564	3.70656	1	0.0541989	0.730208
GCST90001800	0.163658	0.968171	0.923384	1.01296	0.132083	1	0.716282	0
GCST90001574	0.16602	0.957229	0.896707	1.01775	0.558777	1	0.454754	0
GCST90001735	0.168683	0.962945	0.910181	1.01571	0.0721873	1	0.788178	0
GCST90001849	0.169402	0.964667	0.91427	1.01506	0.47936	1	0.488712	0
GCST90001939	0.171049	0.933848	0.83913	1.02857	0.650996	1	0.419757	0
GCST90001496	0.171967	1.02226	0.990321	1.05419	0.067042	1	0.795693	0
GCST90001974	0.172897	1.04245	0.981404	1.1035	0.466332	1	0.494679	0
GCST90002043	0.174962	0.959967	0.902121	1.01781	0.000423234	1	0.983587	0
GCST90001680	0.175806	1.04592	0.979438	1.1124	0.555382	1	0.456127	0
GCST90001738	0.176909	1.03037	0.986291	1.07444	0.738453	1	0.390157	0
GCST90001674	0.178284	1.0532	0.975739	1.13065	1.29428	1	0.25526	0.227372
GCST90001882	0.17959	1.02009	0.990748	1.04944	0.432399	1	0.510814	0
GCST90001710	0.179888	0.97077	0.928051	1.01349	0.0399743	1	0.841531	0
GCST90002097	0.179999	1.0743	0.965685	1.18292	2.69454	1	0.100693	0.628879
GCST90001887	0.181021	1.03968	0.981539	1.09782	1.44693	1	0.229021	0.308882
GCST90001760	0.184184	0.968779	0.9227	1.01486	0.131046	1	0.71735	0
GCST90002089	0.186199	1.03333	0.983915	1.08274	0.235828	1	0.627236	0
GCST90001426	0.186243	0.971001	0.928001	1.014	0.0172242	1	0.895585	0
GCST90001934	0.190269	0.954526	0.886478	1.02257	1.35892	1	0.243725	0.26412
GCST90002108	0.192027	0.981771	0.954384	1.00916	0.471401	1	0.492343	0
GCST90001836	0.193517	1.02778	0.985907	1.06965	0.479142	1	0.488811	0
GCST90001601	0.194535	1.05404	0.972397	1.13568	0.0246652	1	0.875204	0
GCST90001773	0.194604	0.978361	0.945662	1.01106	0.195837	1	0.658102	0
GCST90001469	0.19616	0.974563	0.935993	1.01313	0.0139866	1	0.905858	0
GCST90001801	0.199477	0.974684	0.936012	1.01336	0.344865	1	0.557034	0
GCST90001435	0.199859	0.949585	0.872505	1.02666	2.04143	1	0.153066	0.510147
GCST90001667	0.201875	1.01174	0.993712	1.02976	0.0375445	1	0.846361	0
GCST90002079	0.20327	0.933693	0.831547	1.03584	0.0204186	1	0.886374	0
GCST90002026	0.205837	0.965199	0.911283	1.01911	0.0531961	1	0.817592	0
GCST90001726	0.205899	0.979709	0.948269	1.01115	0.0363314	1	0.848833	0
GCST90001660	0.206107	0.977731	0.943211	1.01225	0.379939	1	0.537636	0
GCST90001589	0.207602	0.94837	0.868069	1.02867	0.0206795	1	0.885656	0
GCST90001886	0.209611	0.971265	0.926375	1.01615	0.444898	1	0.504768	0
GCST90001542	0.210232	0.964877	0.909934	1.01982	1.48517	1	0.222968	0.326676
GCST90001561	0.215225	1.06826	0.960309	1.17621	7.38513	1	0.00657652	0.864593
GCST90001929	0.215745	1.04365	0.974543	1.11275	0.309414	1	0.57804	0
GCST90001425	0.216219	0.94286	0.852298	1.03342	2.66884	1	0.102331	0.625305
GCST90001566	0.218269	1.1167	0.930917	1.30248	2.98069	1	0.0842632	0.664507
GCST90001771	0.219121	1.02212	0.986839	1.05741	0.859799	1	0.353795	0
GCST90001428	0.219146	0.96518	0.909641	1.02072	1.27103	1	0.259574	0.213236
GCST90001657	0.225459	1.08555	0.947222	1.22387	1.26022	1	0.26161	0.206485
GCST90001826	0.226896	0.958706	0.891728	1.02568	1.14962	1	0.283628	0.130149
GCST90001683	0.226927	0.962932	0.902805	1.02306	0.106106	1	0.744622	0
GCST90001395	0.230012	0.975205	0.934717	1.01569	0.433308	1	0.51037	0
GCST90001972	0.233396	1.02355	0.984817	1.06228	0.0774312	1	0.780809	0
GCST90002028	0.233698	0.971051	0.923406	1.0187	0.0051803	1	0.942622	0
GCST90001608	0.234472	0.954894	0.880536	1.02925	0.125184	1	0.723478	0
GCST90001421	0.234733	0.978223	0.942304	1.01414	0.304796	1	0.580891	0
GCST90001398	0.23676	1.04774	0.968655	1.12682	0.000226111	1	0.988003	0
GCST90001461	0.238165	0.960044	0.893654	1.02643	0.00187406	1	0.96547	0
GCST90001462	0.239073	0.981526	0.950771	1.01228	0.0212163	1	0.884191	0
GCST90001749	0.239716	1.034	0.977318	1.09069	0.15313	1	0.695562	0
GCST90001583	0.243969	1.04655	0.968246	1.12485	2.13806	1	0.143684	0.532286
GCST90001913	0.24729	0.962484	0.898929	1.02604	0.0286649	1	0.865555	0
GCST90001602	0.249429	0.966976	0.910779	1.02317	0.325058	1	0.568584	0
GCST90001651	0.250286	0.953708	0.874787	1.03263	0.122944	1	0.725864	0
GCST90001797	0.250776	1.03571	0.974768	1.09665	0.883637	1	0.347207	0
GCST90001828	0.25746	0.96886	0.914964	1.02276	0.765828	1	0.381511	0
GCST90001932	0.25753	1.08652	0.936749	1.23629	2.7629	1	0.0964729	0.638062
GCST90001832	0.25853	1.04672	0.965679	1.12775	0.171597	1	0.678696	0
GCST90001816	0.259726	1.06162	0.954462	1.16878	1.89263	1	0.168906	0.471633
GCST90001431	0.261731	0.970722	0.919591	1.02185	0.713316	1	0.398345	0
GCST90001644	0.26423	0.97192	0.922625	1.02122	0.109879	1	0.740282	0
GCST90001559	0.265266	1.03371	0.974405	1.09301	0.143742	1	0.704589	0
GCST90001518	0.268772	1.01069	0.991741	1.02965	0.692474	1	0.405324	0
GCST90001555	0.273634	0.950888	0.862959	1.03882	3.11109	1	0.077761	0.678569
GCST90001752	0.27477	0.972639	0.923536	1.02174	0.460379	1	0.497447	0
GCST90001606	0.275668	0.924375	0.788404	1.06035	1.25587	1	0.262435	0.203737
GCST90001990	0.275919	0.958764	0.884584	1.03294	0.193045	1	0.660394	0
GCST90001440	0.27861	0.965537	0.903194	1.02788	0.0217823	1	0.882668	0
GCST90001682	0.280211	1.05099	0.958444	1.14353	0.22701	1	0.63375	0
GCST90001776	0.281078	0.94941	0.857422	1.0414	1.43053	1	0.231678	0.30096
GCST90001594	0.281675	0.959323	0.885268	1.03338	0.312014	1	0.576447	0
GCST90001400	0.282516	1.02037	0.983221	1.05752	0.485006	1	0.486164	0
GCST90001588	0.284574	0.968383	0.910474	1.02629	0.533373	1	0.465192	0
GCST90001809	0.285142	1.0898	0.925132	1.25447	1.63892	1	0.200473	0.389843
GCST90002057	0.285306	0.87187	0.636834	1.10691	4.85506	1	0.0275652	0.794029
GCST90001762	0.286781	0.973292	0.924149	1.02243	0.568008	1	0.451052	0
GCST90001630	0.286874	1.03872	0.967466	1.10996	0.110602	1	0.73946	0
GCST90001581	0.288762	1.01695	0.985636	1.04826	0.0334785	1	0.854821	0
GCST90001554	0.292282	0.935459	0.815342	1.05558	3.87913	1	0.04889	0.74221
GCST90001474	0.292303	1.02615	0.977477	1.07483	0.095056	1	0.757845	0
GCST90001437	0.29321	0.957202	0.877399	1.03701	0.0015773	1	0.96832	0
GCST90001517	0.295835	1.01248	0.989085	1.03587	0.0413456	1	0.838872	0
GCST90001711	0.297539	0.976514	0.932325	1.0207	0.193111	1	0.66034	0
GCST90001985	0.298079	1.01461	0.987092	1.04213	0.100146	1	0.751654	0
GCST90001979	0.303587	1.02114	0.980865	1.06141	0.787774	1	0.374774	0
GCST90001780	0.305493	1.01371	0.987483	1.03995	0.419153	1	0.51736	0
GCST90001949	0.306812	0.9779	0.935515	1.02029	0.149292	1	0.699212	0
GCST90001530	0.308615	0.957101	0.874518	1.03968	1.37342	1	0.241226	0.271888
GCST90001538	0.309808	1.01022	0.990494	1.02995	0.278384	1	0.597762	0
GCST90001560	0.313676	1.02973	0.971901	1.08755	3.70468	1	0.0542602	0.730071
GCST90001861	0.316705	1.03259	0.968796	1.09638	0.0327245	1	0.856447	0
GCST90001534	0.317329	0.960106	0.881911	1.0383	2.06507	1	0.150708	0.515754
GCST90001681	0.31951	1.02857	0.972323	1.08481	0.0409177	1	0.839697	0
GCST90001417	0.31962	0.974501	0.924285	1.02472	0.306269	1	0.579979	0
GCST90001786	0.328416	1.04362	0.95614	1.1311	0.0805106	1	0.776607	0
GCST90002007	0.329511	1.01674	0.98309	1.05039	0.821006	1	0.364886	0
GCST90001879	0.331319	0.979328	0.937621	1.02103	0.269787	1	0.603475	0
GCST90002111	0.332338	1.02689	0.972519	1.08127	0.223219	1	0.636598	0
GCST90001652	0.333709	1.06239	0.935888	1.1889	2.44727	1	0.11773	0.591381
GCST90001753	0.335306	1.0366	0.962147	1.11105	1.39458	1	0.237633	0.282939
GCST90001405	0.336879	0.964668	0.892559	1.03678	1.6927	1	0.193246	0.409228
GCST90001883	0.337643	0.974396	0.92206	1.02673	0.941316	1	0.33194	0
GCST90001731	0.339109	0.883302	0.644032	1.12257	4.42632	1	0.0353886	0.774079
GCST90001442	0.340961	1.03907	0.958658	1.11948	2.27393	1	0.131566	0.560233
GCST90001966	0.341193	1.03089	0.967279	1.09451	0.0188613	1	0.890765	0
GCST90001742	0.343047	1.02264	0.975835	1.06945	0.0105972	1	0.918009	0
GCST90001919	0.345094	1.05017	0.946025	1.15431	2.85617	1	0.0910238	0.649881
GCST90001640	0.346372	0.920749	0.755795	1.0857	0.142493	1	0.705815	0
GCST90002078	0.351766	0.973889	0.918929	1.02885	0.0637948	1	0.800596	0
GCST90001903	0.351928	0.934454	0.796442	1.07246	2.38732	1	0.122323	0.58112
GCST90001647	0.35346	1.05299	0.941061	1.16492	4.19531	1	0.0405359	0.761639
GCST90001981	0.357965	1.01647	0.981358	1.05157	0.511339	1	0.47456	0
GCST90001992	0.360316	0.986955	0.959005	1.01491	0.3945	1	0.529943	0
GCST90001580	0.361924	1.03248	0.962661	1.10229	0.878802	1	0.34853	0
GCST90001551	0.364244	1.03566	0.958626	1.1127	1.49978	1	0.220705	0.333235
GCST90001896	0.365703	0.976682	0.926159	1.02721	0.000855612	1	0.976665	0
GCST90001546	0.366733	1.03549	0.95842	1.11257	0.00286867	1	0.957286	0
GCST90002010	0.367518	1.02265	0.973385	1.07192	1.1236	1	0.289145	0.110003
GCST90001812	0.367593	0.974073	0.917673	1.03047	0.011039	1	0.916323	0
GCST90001632	0.367726	1.03507	0.958765	1.11137	0.00566673	1	0.939994	0
GCST90002054	0.369936	1.03669	0.956488	1.11689	0.0835237	1	0.772578	0
GCST90001481	0.370994	1.02472	0.970565	1.07887	1.85806	1	0.172849	0.461804
GCST90001912	0.373395	1.038	0.95433	1.12167	1.03201	1	0.309688	0.0310131
GCST90001741	0.376437	1.01274	0.984512	1.04096	0.0595279	1	0.807244	0
GCST90001996	0.377883	0.969761	0.902549	1.03697	1.79766	1	0.179996	0.443721
GCST90002095	0.382067	0.919996	0.740606	1.09939	5.83735	1	0.0156894	0.828689
GCST90001413	0.383638	1.02271	0.971618	1.0738	0.201169	1	0.653779	0
GCST90001617	0.383983	1.01454	0.981803	1.04728	0.569036	1	0.450642	0
GCST90001411	0.385138	1.05015	0.936972	1.16333	1.18047	1	0.277261	0.152876
GCST90002005	0.388012	1.06431	0.918295	1.21032	3.26562	1	0.0707463	0.693779
GCST90001552	0.389818	1.02939	0.962409	1.09636	3.05185	1	0.0806452	0.67233
GCST90001888	0.390676	0.975135	0.91836	1.03191	0.544693	1	0.460494	0
GCST90002094	0.391214	1.04903	0.936948	1.16112	3.56624	1	0.0589658	0.719592
GCST90001568	0.391224	1.02935	0.962262	1.09643	0.389992	1	0.532303	0
GCST90001631	0.392922	1.02759	0.964293	1.09089	0.000967456	1	0.975187	0
GCST90001834	0.395215	1.04987	0.934902	1.16484	2.66429	1	0.102624	0.624666
GCST90001541	0.398456	1.0246	0.967497	1.08171	0.291209	1	0.589447	0
GCST90001584	0.400144	1.03067	0.959218	1.10213	0.153698	1	0.695026	0
GCST90001649	0.401689	1.02259	0.9698	1.07537	1.00025	1	0.317249	0.000254643
GCST90001637	0.402331	0.973559	0.911677	1.03544	0.0140948	1	0.905496	0
GCST90001818	0.407744	1.09646	0.868093	1.32483	2.20958	1	0.137156	0.547426
GCST90001607	0.40849	1.04897	0.932854	1.16508	0.155419	1	0.69341	0
GCST90001928	0.413175	1.03333	0.953504	1.11315	1.5194	1	0.21771	0.341845
GCST90001628	0.413745	0.986035	0.952545	1.01952	0.0307892	1	0.860712	0
GCST90001817	0.416686	0.883996	0.604055	1.16394	3.98713	1	0.0458491	0.749193
GCST90001930	0.416841	0.976933	0.92125	1.03262	0.318263	1	0.572654	0
GCST90002115	0.417216	1.07814	0.889358	1.26692	3.28236	1	0.0700284	0.695341
GCST90001407	0.417906	1.0141	0.979988	1.04821	0.736276	1	0.390856	0
GCST90002037	0.421454	1.04238	0.939056	1.1457	2.93197	1	0.0868416	0.658932
GCST90002060	0.4246	0.926221	0.745118	1.10732	8.82515	1	0.00297106	0.886688
GCST90001926	0.426946	0.971147	0.899961	1.04233	0.0169311	1	0.896472	0
GCST90001844	0.427402	1.02396	0.964791	1.08313	1.15408	1	0.282698	0.133505
GCST90001983	0.430564	0.964086	0.874782	1.05339	0.196446	1	0.657605	0
GCST90001704	0.43066	0.960873	0.863562	1.05818	2.82935	1	0.0925557	0.646562
GCST90001646	0.431845	1.0317	0.95266	1.11074	3.6584	1	0.055787	0.726657
GCST90001619	0.435523	1.05818	0.911939	1.20443	6.42669	1	0.0112418	0.844399
GCST90001563	0.436529	1.02386	0.96375	1.08398	0.0399276	1	0.841622	0
GCST90001553	0.437459	1.03251	0.950445	1.11458	1.92524	1	0.16528	0.480585
GCST90001775	0.438449	0.985009	0.947087	1.02293	0.0620457	1	0.803291	0
GCST90001982	0.438973	0.986641	0.952809	1.02047	0.596676	1	0.439849	0
GCST90001968	0.439273	1.02822	0.956709	1.09973	0.188158	1	0.664454	0
GCST90001585	0.439406	1.09391	0.855852	1.33198	6.18766	1	0.0128644	0.838388
GCST90001768	0.441691	1.01952	0.969788	1.06926	0.00514244	1	0.942832	0
GCST90002103	0.448109	0.970892	0.895685	1.0461	0.496198	1	0.481176	0
GCST90002068	0.448804	1.04186	0.933546	1.15016	2.60607	1	0.106456	0.61628
GCST90002031	0.451371	1.01168	0.981282	1.04208	0.317523	1	0.5731	0
GCST90001960	0.454972	1.05164	0.916174	1.18711	4.32239	1	0.0376141	0.768646
GCST90002085	0.45665	1.02096	0.96577	1.07615	0.673804	1	0.411729	0
GCST90001634	0.459303	0.974365	0.906468	1.04226	0.367331	1	0.544462	0
GCST90001784	0.4619	1.03678	0.938793	1.13477	2.84916	1	0.0914218	0.649019
GCST90001821	0.461982	0.978069	0.919636	1.0365	0.114908	1	0.734624	0
GCST90001396	0.466016	0.93609	0.764258	1.10792	1.54233	1	0.214271	0.351631
GCST90001597	0.466577	1.02562	0.956651	1.09459	0.00192502	1	0.965004	0
GCST90001653	0.468421	0.980084	0.926246	1.03392	0.54723	1	0.459452	0
GCST90001656	0.468421	1.01992	0.966079	1.07375	0.54723	1	0.459452	0
GCST90001757	0.468642	0.993621	0.976367	1.01087	0.0188248	1	0.89087	0
GCST90001465	0.471593	0.989868	0.962282	1.01745	0.770213	1	0.380151	0
GCST90002030	0.472626	1.02207	0.961851	1.08228	0.00362385	1	0.951998	0
GCST90001754	0.473696	0.969965	0.887804	1.05213	0.728772	1	0.393281	0
GCST90001951	0.473701	0.9854	0.945462	1.02534	0.0412755	1	0.839007	0
GCST90001464	0.474291	0.985709	0.946562	1.02486	0.498788	1	0.480033	0
GCST90001962	0.474907	1.05249	0.908514	1.19646	0.0125125	1	0.910935	0
GCST90001616	0.475599	1.05046	0.91183	1.18909	1.81801	1	0.17755	0.449948
GCST90002048	0.476627	0.982125	0.9329	1.03135	0.226471	1	0.634153	0
GCST90001829	0.478932	0.957472	0.839746	1.0752	3.81466	1	0.050806	0.737853
GCST90001923	0.479853	0.980225	0.925367	1.03508	0.0316871	1	0.858716	0
GCST90002000	0.48009	0.982796	0.935045	1.03055	0.0521926	1	0.819291	0
GCST90001994	0.483759	0.953343	0.822757	1.08393	4.56972	1	0.0325419	0.781168
GCST90001460	0.485249	0.987458	0.952235	1.02268	0.0940158	1	0.759133	0
GCST90001846	0.487612	1.03868	0.929451	1.14792	1.62706	1	0.20211	0.385395
GCST90001716	0.48861	0.967363	0.874994	1.05973	2.26415	1	0.132398	0.558334
GCST90001544	0.490496	1.02065	0.961946	1.07936	0.00240939	1	0.960851	0
GCST90001723	0.492319	1.02197	0.959265	1.08467	1.23686	1	0.266078	0.191498
GCST90001576	0.494818	1.05377	0.899386	1.20816	1.35683	1	0.244087	0.262989
GCST90001679	0.496438	1.02799	0.947331	1.10865	0.0628969	1	0.801974	0
GCST90001533	0.496587	0.980951	0.926036	1.03587	0.209669	1	0.647027	0
GCST90001457	0.496992	1.01837	0.965366	1.07137	1.05446	1	0.304482	0.051649
GCST90001987	0.497336	1.00729	0.98624	1.02834	0.983677	1	0.321293	0
GCST90001536	0.498384	0.99306	0.972971	1.01315	0.0436767	1	0.834456	0
GCST90002035	0.499911	1.01594	0.969631	1.06225	0.231213	1	0.630626	0
GCST90002045	0.500153	0.967121	0.871545	1.0627	1.29278	1	0.255536	0.226474
GCST90001599	0.500649	0.969492	0.880704	1.05828	0.0350227	1	0.851548	0
GCST90001916	0.502878	1.04916	0.905349	1.19297	1.55872	1	0.211852	0.358449
GCST90001878	0.503882	0.985719	0.943843	1.0276	1.25597	1	0.262416	0.203802
GCST90001986	0.50535	0.970849	0.885075	1.05662	0.486133	1	0.485657	0
GCST90001965	0.50584	0.96551	0.863906	1.06711	2.76672	1	0.0962435	0.638561
GCST90002041	0.509151	1.02693	0.946974	1.10689	0.259564	1	0.61042	0
GCST90001777	0.512433	0.986068	0.944383	1.02775	1.39272	1	0.237946	0.281982
GCST90001815	0.513255	1.01118	0.977666	1.04469	0.0064018	1	0.936228	0
GCST90001761	0.514306	1.06384	0.87197	1.25571	5.64413	1	0.0175139	0.822825
GCST90002016	0.516399	1.01659	0.966491	1.06668	0.965925	1	0.325699	0
GCST90001510	0.520797	0.967539	0.868456	1.06662	3.50239	1	0.0612803	0.714481
GCST90001715	0.521323	0.97959	0.917215	1.04197	1.45258	1	0.228114	0.311571
GCST90001740	0.524192	1.02334	0.951504	1.09519	0.167518	1	0.682327	0
GCST90001473	0.526175	0.984723	0.937484	1.03196	0.0366928	1	0.848092	0
GCST90001781	0.526945	1.04796	0.899387	1.19653	4.91602	1	0.0266087	0.796584
GCST90001638	0.528206	0.979773	0.916921	1.04263	0.432022	1	0.510998	0
GCST90001506	0.529124	1.0197	0.958354	1.08104	0.027364	1	0.868613	0
GCST90001989	0.529949	0.987774	0.949621	1.02593	0.152731	1	0.695939	0
GCST90001470	0.530741	1.01855	0.960543	1.07657	0.339218	1	0.560281	0
GCST90001591	0.531382	0.979887	0.916903	1.04287	0.758766	1	0.383715	0
GCST90002113	0.532883	1.03369	0.927806	1.13957	2.28288	1	0.130809	0.561957
GCST90001498	0.534488	0.936161	0.73473	1.13759	3.4477	1	0.0633399	0.709951
GCST90001971	0.535926	1.01916	0.958483	1.07984	0.000169734	1	0.989605	0
GCST90002100	0.536864	1.04228	0.908102	1.17645	2.5274	1	0.111884	0.604337
GCST90001503	0.53919	1.00579	0.987305	1.02428	0.905257	1	0.341376	0
GCST90001953	0.539734	1.01089	0.976089	1.04569	0.710098	1	0.399411	0
GCST90001957	0.539837	0.987916	0.949283	1.02655	0.203098	1	0.652231	0
GCST90001687	0.539946	0.965567	0.855454	1.07568	0.0158771	1	0.899729	0
GCST90001901	0.54028	0.990875	0.961669	1.02008	0.464956	1	0.495317	0
GCST90001819	0.541166	1.01493	0.96704	1.06282	0.149218	1	0.699283	0
GCST90002049	0.542121	1.01566	0.965307	1.06602	0.0728999	1	0.78716	0
GCST90002018	0.543123	0.981739	0.922884	1.0406	0.265395	1	0.606438	0
GCST90001703	0.543569	0.979089	0.911618	1.04656	1.65095	1	0.19883	0.394287
GCST90001845	0.545053	0.979269	0.912128	1.04641	1.38905	1	0.238566	0.280083
GCST90001623	0.547653	1.03236	0.926869	1.13786	2.03801	1	0.15341	0.509326
GCST90002082	0.548475	0.985886	0.939785	1.03199	0.452607	1	0.5011	0
GCST90002072	0.548717	1.0174	0.960525	1.07428	0.515116	1	0.472933	0
GCST90001774	0.55206	1.04128	0.905238	1.17731	2.26292	1	0.132504	0.558092
GCST90002013	0.552283	0.987486	0.94622	1.02875	0.0516563	1	0.820206	0
GCST90001495	0.553975	1.01135	0.973753	1.04895	0.000823842	1	0.977102	0
GCST90001451	0.554015	1.01759	0.959336	1.07584	0.723584	1	0.394971	0
GCST90001556	0.556551	0.964162	0.844698	1.08363	3.71113	1	0.0540508	0.73054
GCST90001485	0.557585	1.00748	0.982476	1.03249	0.838705	1	0.359767	0
GCST90001789	0.557871	0.975395	0.8931	1.05769	1.17151	1	0.27909	0.146404
GCST90002064	0.559366	0.975131	0.891636	1.05863	0.0898543	1	0.764363	0
GCST90002053	0.559719	0.988886	0.951541	1.02623	0.0158776	1	0.899727	0
GCST90001613	0.560294	1.03225	0.92372	1.14078	2.84387	1	0.0917228	0.648367
GCST90001958	0.565049	0.978927	0.907141	1.05071	0.159854	1	0.689291	0
GCST90001643	0.565903	0.985086	0.934171	1.036	1.75987	1	0.184641	0.431775
GCST90001558	0.566049	1.02621	0.936695	1.11572	1.68475	1	0.194294	0.406441
GCST90001993	0.56734	1.02759	0.933039	1.12215	0.806564	1	0.369138	0
GCST90001570	0.568207	1.01381	0.966389	1.06122	0.0506291	1	0.821972	0
GCST90001406	0.569204	1.01808	0.955835	1.08032	0.202793	1	0.652476	0
GCST90002004	0.56946	1.02417	0.940902	1.10743	1.63529	1	0.200973	0.388488
GCST90001705	0.571067	0.979054	0.906583	1.05152	1.66518	1	0.196905	0.399464
GCST90001755	0.57281	1.03062	0.924195	1.13705	1.43551	1	0.230867	0.303385
GCST90001833	0.575179	1.01801	0.955035	1.08098	0.492876	1	0.482647	0
GCST90001948	0.576129	0.989329	0.951918	1.02674	0.169855	1	0.680241	0
GCST90002009	0.576547	0.989334	0.951899	1.02677	0.281334	1	0.595828	0
GCST90001719	0.579516	0.971686	0.871534	1.07184	2.75394	1	0.0970153	0.636883
GCST90001573	0.579641	0.986047	0.936673	1.03542	0.0296314	1	0.863329	0
GCST90001751	0.581643	0.954639	0.793282	1.116	4.52134	1	0.0334746	0.778827
GCST90001598	0.582228	0.975629	0.888802	1.06246	0.00260683	1	0.95928	0
GCST90001978	0.583687	0.99023	0.955285	1.02517	0.364082	1	0.546248	0
GCST90001505	0.583783	0.980352	0.910063	1.05064	0.390083	1	0.532256	0
GCST90001391	0.58492	1.02298	0.940514	1.10545	1.04744	1	0.306097	0.0452924
GCST90001419	0.586898	1.02298	0.940072	1.1059	0.0947988	1	0.758163	0
GCST90001420	0.589798	0.985687	0.933651	1.03772	0.0688303	1	0.793048	0
GCST90002065	0.590345	1.01719	0.9546	1.07978	0.571072	1	0.449833	0
GCST90001611	0.591005	0.975567	0.886455	1.06468	0.0817098	1	0.774994	0
GCST90002034	0.591781	0.986945	0.939232	1.03466	1.744	1	0.186633	0.426605
GCST90001910	0.591945	1.0355	0.905695	1.1653	3.35872	1	0.0668501	0.702267
GCST90001488	0.592369	0.954031	0.785751	1.12231	3.92267	1	0.0476392	0.745071
GCST90001625	0.592828	0.977723	0.896073	1.05937	0.0621796	1	0.803084	0
GCST90001963	0.594319	0.986068	0.934797	1.03734	1.48212	1	0.223444	0.325289
GCST90001724	0.595221	0.981005	0.91093	1.05108	1.61033	1	0.204446	0.379008
GCST90001438	0.597124	0.975096	0.882745	1.06745	0.705482	1	0.400948	0
GCST90001487	0.597485	0.986283	0.935368	1.0372	0.150195	1	0.698349	0
GCST90001782	0.598106	1.02236	0.939232	1.10548	4.21568	1	0.0400521	0.76279
GCST90001550	0.598639	0.977485	0.893649	1.06132	1.0945	1	0.295476	0.0863423
GCST90002047	0.598981	0.98395	0.924129	1.04377	0.0481337	1	0.826343	0
GCST90002090	0.600205	0.981465	0.912149	1.05078	0.768899	1	0.380558	0
GCST90001858	0.600218	0.990172	0.953419	1.02693	0.0199329	1	0.887725	0
GCST90001808	0.601725	0.976479	0.888151	1.06481	1.72065	1	0.18961	0.418823
GCST90001500	0.602181	0.984737	0.927346	1.04213	1.07227	1	0.300433	0.0674004
GCST90001714	0.602638	0.90718	0.557735	1.25662	4.98349	1	0.0255902	0.799338
GCST90001609	0.602673	1.01876	0.948129	1.08939	0.0616662	1	0.803882	0
GCST90001727	0.603368	1.00754	0.979108	1.03596	0.124925	1	0.723753	0
GCST90001696	0.604136	1.00025	0.999316	1.00118	0.130098	1	0.71833	0
GCST90001863	0.605578	1.01748	0.951139	1.08382	0.0016691	1	0.967412	0
GCST90001432	0.610118	1.02123	0.939617	1.10285	0.0201335	1	0.887165	0
GCST90002106	0.610636	0.970927	0.859016	1.08284	5.01833	1	0.0250804	0.80073
GCST90001508	0.611323	0.993373	0.967816	1.01893	0.286956	1	0.592178	0
GCST90001712	0.611593	0.989678	0.949839	1.02952	0.987604	1	0.320329	0
GCST90002073	0.612774	1.02834	0.918589	1.13809	2.41212	1	0.120399	0.585426
GCST90001492	0.612802	1.00602	0.982694	1.02935	1.08331	1	0.297958	0.0769025
GCST90001528	0.612879	0.992877	0.965284	1.02047	0.241556	1	0.623085	0
GCST90001931	0.613778	1.12179	0.648808	1.59478	11.3791	1	0.000742757	0.912119
GCST90001857	0.61412	0.989139	0.94692	1.03136	0.0953803	1	0.757446	0
GCST90001486	0.616203	0.9888	0.945004	1.0326	0.690256	1	0.406077	0
GCST90001422	0.617744	0.984923	0.925709	1.04414	0.879211	1	0.348418	0
GCST90001494	0.61967	1.00764	0.977461	1.03783	0.489403	1	0.484194	0
GCST90001874	0.620255	0.988073	0.940896	1.03525	0.00702847	1	0.933187	0
GCST90002071	0.621567	1.01139	0.966161	1.05662	1.09863	1	0.294567	0.0897755
GCST90002104	0.621621	0.98733	0.937015	1.03764	1.33491	1	0.247934	0.250884
GCST90001799	0.622933	0.977389	0.88726	1.06752	2.3187	1	0.127827	0.568724
GCST90001803	0.623669	0.944963	0.725112	1.16481	1.85145	1	0.173615	0.459881
GCST90001467	0.628176	1.03062	0.906708	1.15453	2.25017	1	0.133599	0.55559
GCST90001954	0.629818	1.00588	0.981967	1.02979	0.1895	1	0.663333	0
GCST90001975	0.632698	1.02501	0.92244	1.12758	1.57632	1	0.209292	0.36561
GCST90001468	0.634089	0.984883	0.922633	1.04713	0.268811	1	0.60413	0
GCST90001813	0.636068	1.01242	0.960963	1.06389	0.262553	1	0.608371	0
GCST90001802	0.636772	0.974208	0.867157	1.08126	2.32157	1	0.127591	0.569257
GCST90001856	0.638205	1.01538	0.951284	1.07947	1.19895	1	0.273531	0.165939
GCST90001627	0.639213	0.991943	0.95826	1.02563	0.00972294	1	0.921452	0
GCST90001504	0.639391	0.970416	0.846663	1.09417	3.86732	1	0.049235	0.741423
GCST90002042	0.641598	0.985976	0.926924	1.04503	0.71181	1	0.398844	0
GCST90001956	0.642428	0.991692	0.95662	1.02676	0.459216	1	0.49799	0
GCST90001920	0.644484	0.986899	0.931254	1.04254	0.0343292	1	0.853008	0
GCST90001718	0.645107	0.98538	0.923162	1.0476	1.51602	1	0.218222	0.34038
GCST90001610	0.645327	0.983137	0.911329	1.05495	0.117554	1	0.731703	0
GCST90002039	0.645698	1.01412	0.953929	1.07431	0.0833721	1	0.772779	0
GCST90001870	0.646213	0.986424	0.928457	1.04439	1.61347	1	0.204005	0.380217
GCST90002023	0.646295	1.01796	0.941261	1.09466	0.082563	1	0.773854	0
GCST90001621	0.647574	0.962272	0.800513	1.12403	4.15837	1	0.0414292	0.759521
GCST90001872	0.647855	1.00654	0.978471	1.03461	0.847659	1	0.357216	0
GCST90001522	0.648068	1.01239	0.959204	1.06557	0.103665	1	0.747475	0
GCST90001778	0.648699	0.969048	0.835883	1.10221	5.1636	1	0.0230651	0.806337
GCST90001622	0.64896	1.02527	0.916451	1.1341	2.07218	1	0.150007	0.517416
GCST90002002	0.649046	1.03215	0.893681	1.17062	1.59455	1	0.206677	0.372865
GCST90001787	0.649212	0.986779	0.929808	1.04375	1.21489	1	0.270366	0.17688
GCST90001659	0.649751	1.00952	0.968445	1.05059	0.317035	1	0.573395	0
GCST90001793	0.650521	0.980678	0.897085	1.06427	1.02287	1	0.311839	0.0223586
GCST90001399	0.650547	1.04372	0.854552	1.23289	3.25276	1	0.0713032	0.692569
GCST90001403	0.654764	0.985501	0.92195	1.04905	0.243295	1	0.621836	0
GCST90001441	0.656806	1.02118	0.927743	1.11462	0.212154	1	0.645085	0
GCST90002062	0.657336	0.985948	0.923862	1.04803	0.021769	1	0.882703	0
GCST90001701	0.657411	0.978068	0.881142	1.07499	1.86207	1	0.172386	0.462963
GCST90002102	0.65818	0.993815	0.966416	1.02121	1.24303e-05	1	0.997187	0
GCST90001720	0.660274	0.978878	0.884691	1.07307	2.37747	1	0.123096	0.579386
GCST90001511	0.664528	0.990272	0.946305	1.03424	0.0069236	1	0.933686	0
GCST90001507	0.664538	0.991262	0.951768	1.03076	0.475901	1	0.490285	0
GCST90002001	0.664698	0.956752	0.761189	1.15232	4.50448	1	0.0338062	0.777999
GCST90001737	0.664917	1.00665	0.976563	1.03673	0.000345798	1	0.985164	0
GCST90001672	0.665139	1.0099	0.965054	1.05476	0.639571	1	0.423866	0
GCST90001917	0.665337	0.996876	0.982722	1.01103	1.43009e-05	1	0.996983	0
GCST90002119	0.665763	1.01036	0.963357	1.05736	0.411788	1	0.521063	0
GCST90002074	0.665831	0.986939	0.927667	1.04621	0.706412	1	0.400638	0
GCST90001397	0.66835	1.02527	0.909673	1.14086	2.97494	1	0.0845632	0.663859
GCST90001839	0.668558	1.01205	0.956893	1.0672	0.460955	1	0.497178	0
GCST90001540	0.668925	1.02109	0.924409	1.11778	1.25971	1	0.261707	0.206163
GCST90001592	0.670676	0.978978	0.882084	1.07587	3.03281	1	0.0815967	0.670272
GCST90001713	0.67112	0.978068	0.87683	1.07931	0.660058	1	0.416539	0
GCST90001859	0.672875	0.990989	0.949156	1.03282	0.699455	1	0.402967	0
GCST90001658	0.673777	0.993143	0.961216	1.02507	0.0990509	1	0.752972	0
GCST90001394	0.674072	0.993586	0.963694	1.02348	0.352242	1	0.552847	0
GCST90002012	0.675075	0.988908	0.937044	1.04077	0.0743338	1	0.785128	0
GCST90001423	0.676788	1.02103	0.922153	1.11991	0.0268838	1	0.86976	0
GCST90001964	0.677601	0.99354	0.963083	1.024	0.839328	1	0.359589	0
GCST90001409	0.677677	0.991069	0.948957	1.03318	0.0462185	1	0.829779	0
GCST90002015	0.679681	1.01048	0.960724	1.06024	0.734708	1	0.391361	0
GCST90001582	0.680029	1.00843	0.968368	1.04849	0.119029	1	0.73009	0
GCST90001636	0.680294	1.02656	0.90024	1.15287	1.07747	1	0.299264	0.071902
GCST90001663	0.683379	1.0297	0.886969	1.17243	3.93319	1	0.0473421	0.745753
GCST90002076	0.688216	0.978681	0.874552	1.08281	1.75725	1	0.184968	0.430928
GCST90001479	0.688506	1.01368	0.946814	1.08054	0.581703	1	0.445646	0
GCST90002021	0.689157	0.988922	0.934642	1.0432	0.00298243	1	0.956448	0
GCST90001480	0.689336	1.01037	0.959508	1.06124	0.117112	1	0.732188	0
GCST90001807	0.690011	1.01603	0.93726	1.0948	0.387657	1	0.533533	0
GCST90001593	0.691966	1.02497	0.901452	1.14848	1.9233	1	0.165494	0.48006
GCST90002052	0.694652	0.992086	0.952574	1.0316	0.116392	1	0.732981	0
GCST90001693	0.698663	0.995846	0.974817	1.01688	0.721882	1	0.395527	0
GCST90001402	0.699509	1.03709	0.848741	1.22545	3.24605	1	0.071596	0.691933
GCST90001866	0.700557	1.01388	0.943138	1.08462	0.264124	1	0.607301	0
GCST90001626	0.704447	1.01736	0.927678	1.10703	0.00195924	1	0.964695	0
GCST90002046	0.70488	0.99459	0.966592	1.02259	0.901422	1	0.342401	0
GCST90001408	0.707673	0.989756	0.936211	1.0433	0.048873	1	0.825036	0
GCST90001448	0.708114	0.982676	0.891986	1.07337	1.22111	1	0.269143	0.181074
GCST90001820	0.708523	0.99145	0.946624	1.03628	0.154275	1	0.694483	0
GCST90001436	0.710663	1.00692	0.97036	1.04348	0.0786753	1	0.779101	0
GCST90001770	0.713504	0.979644	0.87098	1.08831	0.0292195	1	0.864273	0
GCST90001393	0.714981	0.98479	0.903152	1.06643	7.41492e-06	1	0.997827	0
GCST90001843	0.718069	1.00923	0.959105	1.05936	0.106427	1	0.74425	0
GCST90001733	0.718149	1.01835	0.918723	1.11797	1.20822	1	0.271685	0.172337
GCST90001516	0.718501	1.01002	0.955546	1.06449	0.163238	1	0.686193	0
GCST90001565	0.719402	0.961982	0.754574	1.16939	6.58329	1	0.010294	0.8481
GCST90001527	0.719455	0.994213	0.962637	1.02579	0.0565154	1	0.812091	0
GCST90001922	0.719666	1.02036	0.90919	1.13152	1.24466	1	0.264574	0.19657
GCST90001618	0.71977	0.993524	0.958144	1.0289	0.30379	1	0.581516	0
GCST90002107	0.72194	1.01174	0.947071	1.07641	0.452293	1	0.501248	0
GCST90001535	0.725936	1.00903	0.958562	1.05949	0.142906	1	0.705409	0
GCST90001548	0.726861	1.05051	0.767107	1.33391	9.46676	1	0.00209228	0.894367
GCST90001894	0.729425	1.00924	0.956859	1.06163	0.333919	1	0.56336	0
GCST90001914	0.729478	1.0097	0.954744	1.06465	0.419943	1	0.516966	0
GCST90001414	0.72983	0.987614	0.917318	1.05791	0.176845	1	0.674098	0
GCST90001512	0.730673	0.994656	0.964231	1.02508	0.0992892	1	0.752684	0
GCST90001472	0.736939	0.992201	0.946696	1.03771	0.0193692	1	0.889313	0
GCST90001520	0.740209	1.007	0.965642	1.04835	0.00167134	1	0.96739	0
GCST90001831	0.74222	1.03994	0.801957	1.27792	4.22405	1	0.039855	0.76326
GCST90001998	0.743911	0.986847	0.907931	1.06576	1.45851	1	0.227167	0.31437
GCST90001466	0.744637	0.985883	0.900938	1.07083	0.0275803	1	0.868099	0
GCST90001676	0.744758	1.02108	0.894188	1.14797	0.59797	1	0.439354	0
GCST90001691	0.746207	0.990411	0.932343	1.04848	2.6842	1	0.101348	0.627449
GCST90001484	0.74938	0.986811	0.905889	1.06773	2.44696	1	0.117753	0.59133
GCST90001502	0.750756	1.00261	0.986524	1.01869	0.267804	1	0.604809	0
GCST90001475	0.751881	0.988509	0.917272	1.05975	9.71949e-05	1	0.992134	0
GCST90001906	0.754483	1.01041	0.945172	1.07565	0.0288416	1	0.865145	0
GCST90001767	0.756292	0.989273	0.921532	1.05701	1.51855	1	0.217839	0.341478
GCST90001840	0.75632	0.984964	0.889999	1.07993	1.44708	1	0.228997	0.308952
GCST90002081	0.756487	1.01092	0.9419	1.07994	0.0511328	1	0.821104	0
GCST90001453	0.758688	0.981332	0.86223	1.10043	1.35599	1	0.244233	0.262533
GCST90002006	0.759854	1.00662	0.964157	1.04909	0.0947772	1	0.75819	0
GCST90001476	0.760846	1.01809	0.901601	1.13458	0.146522	1	0.701881	0
GCST90001677	0.761349	1.01684	0.908146	1.12554	1.54464	1	0.213928	0.3526
GCST90001427	0.761637	0.990158	0.926568	1.05375	0.319617	1	0.571838	0
GCST90001850	0.762192	0.991826	0.938879	1.04477	0.0187803	1	0.890998	0
GCST90001668	0.762631	1.0076	0.958302	1.05689	1.72572	1	0.188959	0.420531
GCST90001590	0.764328	0.990337	0.927167	1.05351	0.425915	1	0.514	0
GCST90001654	0.766056	1.01138	0.93639	1.08638	1.29173	1	0.25573	0.225842
GCST90001790	0.768396	1.00794	0.9551	1.06078	0.492508	1	0.482811	0
GCST90001871	0.770815	0.992469	0.941798	1.04314	0.0031909	1	0.954953	0
GCST90001514	0.771574	1.00786	0.954768	1.06096	0.509495	1	0.475358	0
GCST90002110	0.773039	1.00504	0.970783	1.0393	0.883186	1	0.34733	0
GCST90001513	0.774308	0.992036	0.937603	1.04647	0.988132	1	0.320199	0
GCST90001885	0.775665	0.995081	0.961249	1.02891	0.31182	1	0.576566	0
GCST90001798	0.776525	1.0166	0.902	1.13119	3.17881	1	0.0745992	0.685417
GCST90001642	0.777287	0.991555	0.933039	1.05007	0.154876	1	0.693919	0
GCST90001661	0.777481	1.00708	0.957951	1.05622	0.00804391	1	0.928535	0
GCST90001794	0.777908	1.00643	0.961743	1.05112	1.21903	1	0.269552	0.179673
GCST90001900	0.779851	0.976405	0.810955	1.14185	0.0809034	1	0.776077	0
GCST90001483	0.780567	1.00601	0.9637	1.04833	0.341911	1	0.558728	0
GCST90001852	0.781716	1.02267	0.862338	1.18299	5.64443	1	0.0175109	0.822834
GCST90001869	0.782056	1.01323	0.91951	1.10695	2.16546	1	0.141143	0.538203
GCST90001841	0.783431	1.00596	0.963448	1.04848	0.9913	1	0.319425	0
GCST90001824	0.784506	0.99299	0.942747	1.04323	0.0926298	1	0.76086	0
GCST90001708	0.784822	0.986473	0.889371	1.08357	3.17629	1	0.0747144	0.685167
GCST90002058	0.785364	1.00623	0.961373	1.05109	0.910169	1	0.34007	0
GCST90001792	0.786095	1.00861	0.946428	1.07079	1.60977	1	0.204524	0.378792
GCST90002066	0.787357	1.00465	0.970857	1.03844	0.196131	1	0.657862	0
GCST90001571	0.787836	0.984843	0.874456	1.09523	2.07941	1	0.149298	0.519094
GCST90001433	0.789388	1.01282	0.918736	1.10691	0.139586	1	0.708693	0
GCST90001392	0.790561	1.00685	0.95628	1.05743	1.55111	1	0.212971	0.355302
GCST90002050	0.79064	1.00691	0.955865	1.05796	0.00224908	1	0.962175	0
GCST90001692	0.791197	0.99384	0.948238	1.03944	2.10037	1	0.147264	0.523893
GCST90002022	0.791997	1.00819	0.947328	1.06905	0.492829	1	0.482668	0
GCST90001446	0.79265	0.991717	0.92996	1.05347	0.139597	1	0.708682	0
GCST90001881	0.794107	0.9922	0.933624	1.05078	0.899077	1	0.343029	0
GCST90001717	0.796886	0.994468	0.952341	1.03659	0.850895	1	0.356299	0
GCST90001827	0.797131	0.991045	0.922764	1.05932	0.28571	1	0.592983	0
GCST90001670	0.797624	0.991612	0.927494	1.05573	0.418716	1	0.517578	0
GCST90001521	0.798107	0.994563	0.952902	1.03622	0.286234	1	0.592644	0
GCST90001941	0.799394	1.00423	0.971603	1.03686	0.138984	1	0.709293	0
GCST90001515	0.799529	0.992774	0.937004	1.04854	0.0942322	1	0.758864	0
GCST90001904	0.799741	1.00863	0.941921	1.07535	1.22944	1	0.267515	0.186624
GCST90001434	0.799803	1.00922	0.937935	1.08051	0.000579138	1	0.980801	0
GCST90001722	0.801581	0.991362	0.923994	1.05873	0.399581	1	0.527306	0
GCST90001736	0.80399	1.01136	0.921676	1.10104	1.32691	1	0.249355	0.24637
GCST90001947	0.80555	0.996339	0.967192	1.02549	0.169321	1	0.680716	0
GCST90001493	0.805687	0.995616	0.960687	1.03055	0.381499	1	0.536802	0
GCST90001545	0.806636	0.989192	0.902646	1.07574	0.00480666	1	0.944727	0
GCST90001744	0.806836	1.00935	0.934407	1.08429	0.609546	1	0.434959	0
GCST90002017	0.80865	1.01212	0.914047	1.11019	1.55072	1	0.213029	0.355138
GCST90001605	0.811549	1.00618	0.955351	1.05702	0.383279	1	0.535854	0
GCST90001748	0.811636	1.01225	0.911495	1.11301	1.84345	1	0.174547	0.45754
GCST90001999	0.812525	0.993489	0.939679	1.0473	0.0574502	1	0.810572	0
GCST90002121	0.814364	0.992276	0.927799	1.05675	0.126757	1	0.721818	0
GCST90001501	0.81842	1.00227	0.982916	1.02162	0.410329	1	0.521803	0
GCST90001935	0.818995	1.00979	0.925943	1.09364	0.274419	1	0.600383	0
GCST90001686	0.820266	1.00874	0.93333	1.08415	0.206742	1	0.649333	0
GCST90002077	0.821509	1.0047	0.963885	1.04551	0.261631	1	0.609002	0
GCST90001471	0.821712	1.01082	0.9167	1.10494	1.89402	1	0.168749	0.472023
GCST90001709	0.821747	0.992808	0.93024	1.05538	1.68728	1	0.19396	0.40733
GCST90001449	0.824439	1.00752	0.941051	1.074	0.406729	1	0.523635	0
GCST90001853	0.82454	0.995027	0.951063	1.03899	0.0380641	1	0.845314	0
GCST90001855	0.825144	0.994628	0.946971	1.04228	0.0547536	1	0.814989	0
GCST90001639	0.825447	1.01696	0.86621	1.16772	1.8936	1	0.168796	0.471907
GCST90001942	0.825455	1.00406	0.967946	1.04018	0.0893535	1	0.765001	0
GCST90002032	0.828011	0.996125	0.961166	1.03108	0.0090416	1	0.924245	0
GCST90001810	0.828192	1.00596	0.952107	1.05982	0.602794	1	0.437514	0
GCST90002056	0.830382	0.992691	0.925817	1.05956	0.178507	1	0.672659	0
GCST90001842	0.830418	1.00406	0.966885	1.04124	0.56916	1	0.450593	0
GCST90001743	0.834303	1.00943	0.921055	1.09781	1.21512	1	0.270321	0.177033
GCST90001620	0.834383	0.995842	0.956863	1.03482	0.170805	1	0.679398	0
GCST90001823	0.834969	1.01885	0.841523	1.19617	3.12368	1	0.0771622	0.679865
GCST90001867	0.837617	0.988052	0.873782	1.10232	2.17255	1	0.140493	0.539712
GCST90001430	0.838148	1.00379	0.967404	1.04018	0.018189	1	0.892717	0
GCST90001865	0.838388	1.01544	0.86703	1.16386	2.2479	1	0.133796	0.555141
GCST90001499	0.8403	1.00358	0.968753	1.03841	0.132076	1	0.716289	0
GCST90001401	0.84057	1.01335	0.88328	1.14342	1.48863	1	0.22243	0.328239
GCST90002059	0.841651	0.990542	0.897749	1.08333	0.891736	1	0.345007	0
GCST90002063	0.842286	0.996064	0.957291	1.03484	0.0120445	1	0.91261	0
GCST90001796	0.844166	0.98767	0.86473	1.11061	1.60029	1	0.205862	0.375113
GCST90001410	0.846169	1.01265	0.884876	1.14042	1.36919	1	0.241951	0.269641
GCST90002099	0.846192	0.996951	0.966139	1.02776	0.0643246	1	0.799787	0
GCST90001785	0.849168	0.993767	0.929529	1.05801	0.241639	1	0.623025	0
GCST90001509	0.849994	0.997532	0.971958	1.02311	0.0330324	1	0.85578	0
GCST90001725	0.850321	1.00323	0.969703	1.03675	0.00481484	1	0.94468	0
GCST90001758	0.853225	0.988349	0.864913	1.11178	2.46762	1	0.116214	0.594751
GCST90001404	0.853955	0.995026	0.942068	1.04798	0.0793167	1	0.778226	0
GCST90001889	0.855362	1.00469	0.954225	1.05516	0.00361462	1	0.952059	0
GCST90001577	0.85626	1.00859	0.915635	1.10155	1.26605	1	0.260509	0.210143
GCST90001537	0.857076	0.994427	0.933774	1.05508	1.02951	1	0.310273	0.0286663
GCST90001684	0.857666	0.993519	0.922688	1.06435	0.721337	1	0.395706	0
GCST90001456	0.858041	0.992505	0.910372	1.07464	0.743969	1	0.388393	0
GCST90002027	0.859349	0.989526	0.873678	1.10537	2.43344	1	0.118772	0.58906
GCST90001868	0.859458	0.994639	0.935292	1.05399	0.00869029	1	0.925727	0
GCST90001769	0.859789	0.996149	0.953425	1.03887	1.08804	1	0.296906	0.0809171
GCST90001848	0.860437	1.0069	0.929996	1.0838	0.167029	1	0.682766	0
GCST90002096	0.861174	0.994054	0.927414	1.06069	0.0963631	1	0.756238	0
GCST90001746	0.861237	1.00687	0.929793	1.08396	0.468793	1	0.493543	0
GCST90001454	0.865359	0.984259	0.802302	1.16622	2.28899	1	0.130295	0.563126
GCST90001596	0.865552	0.99642	0.954979	1.03786	0.000148207	1	0.990287	0
GCST90001452	0.866842	0.996133	0.950932	1.04133	0.817999	1	0.365766	0
GCST90001730	0.869106	1.00242	0.973618	1.03123	0.588193	1	0.443119	0
GCST90001603	0.871185	0.992731	0.90487	1.08059	0.5659	1	0.451893	0
GCST90002088	0.873935	0.996092	0.947812	1.04437	0.00145589	1	0.969563	0
GCST90002084	0.874308	1.00243	0.972269	1.0326	0.240623	1	0.623756	0
GCST90001899	0.874591	1.00277	0.96835	1.03719	0.0421113	1	0.837408	0
GCST90001641	0.877937	1.01541	0.818787	1.21203	4.07608	1	0.0434943	0.754667
GCST90002038	0.878482	1.00458	0.94592	1.06323	1.25416	1	0.26276	0.202652
GCST90002083	0.879014	1.0071	0.915656	1.09855	1.2755	1	0.258737	0.215994
GCST90001655	0.879066	1.00492	0.941557	1.06828	0.447263	1	0.503637	0
GCST90001804	0.879092	0.99718	0.96084	1.03352	0.0216732	1	0.88296	0
GCST90001838	0.880946	1.00337	0.959299	1.04744	0.0107425	1	0.91745	0
GCST90001445	0.881435	0.989095	0.84579	1.1324	0.110299	1	0.739804	0
GCST90002114	0.881883	1.00568	0.930737	1.08063	0.112349	1	0.737485	0
GCST90002061	0.883173	1.00418	0.948446	1.05991	0.242247	1	0.622588	0
GCST90001745	0.886442	1.00742	0.90564	1.10919	1.63424	1	0.201118	0.388095
GCST90001750	0.893028	1.01317	0.821277	1.20505	4.46514	1	0.0345932	0.776043
GCST90002019	0.894767	0.994646	0.915317	1.07398	1.99051	1	0.158288	0.497616
GCST90001806	0.895788	0.994417	0.910875	1.07796	1.39915	1	0.236866	0.285279
GCST90002008	0.895793	1.00203	0.971663	1.0324	0.187351	1	0.665131	0
GCST90001791	0.895835	0.99351	0.896359	1.09066	2.06991	1	0.150231	0.516887
GCST90001877	0.895876	0.997183	0.954999	1.03937	0.0384494	1	0.844544	0
GCST90001729	0.89627	1.00753	0.894274	1.12079	1.36756	1	0.242232	0.26877
GCST90001526	0.896288	1.00209	0.970719	1.03345	0.01523	1	0.901783	0
GCST90001455	0.897448	1.0088	0.874998	1.1426	1.06276	1	0.302587	0.0590501
GCST90002118	0.898933	1.00531	0.923312	1.08732	0.241272	1	0.623289	0
GCST90001586	0.898982	0.997779	0.963485	1.03207	0.477562	1	0.489529	0
GCST90002011	0.899979	0.989973	0.833605	1.14634	0.308861	1	0.57838	0
GCST90001765	0.901316	0.99804	0.96706	1.02902	0.24553	1	0.62024	0
GCST90001936	0.901395	1.00307	0.954449	1.0517	1.30894	1	0.252586	0.236026
GCST90001463	0.901486	0.996994	0.949402	1.04459	0.420107	1	0.516883	0
GCST90001779	0.902791	1.00585	0.911927	1.09978	4.6065	1	0.031851	0.782915
GCST90002044	0.905958	1.00517	0.919367	1.09098	0.960702	1	0.32701	0
GCST90001734	0.906916	1.00463	0.926969	1.0823	1.09838	1	0.294621	0.0895705
GCST90001860	0.907672	1.00221	0.96483	1.03959	0.315027	1	0.574611	0
GCST90001973	0.90907	0.99777	0.959508	1.03603	0.00655875	1	0.935453	0
GCST90002024	0.909806	0.995717	0.921621	1.06981	1.11512	1	0.290971	0.103239
GCST90001665	0.909977	0.996787	0.941093	1.05248	1.94387	1	0.163249	0.485563
GCST90002112	0.910569	0.997651	0.956667	1.03864	0.976211	1	0.323136	0
GCST90002051	0.910636	0.992851	0.868003	1.1177	2.69133	1	0.100895	0.628437
GCST90001519	0.911618	1.00232	0.961363	1.04328	0.869002	1	0.351232	0
GCST90001604	0.912304	1.00576	0.903281	1.10824	1.05393	1	0.304603	0.0511716
GCST90001600	0.912574	1.00261	0.956021	1.0492	0.352631	1	0.552628	0
GCST90002098	0.912981	1.00298	0.949532	1.05643	1.39803	1	0.237054	0.284708
GCST90002087	0.914781	1.00258	0.955312	1.04985	0.314545	1	0.574905	0
GCST90001478	0.915896	0.997031	0.941921	1.05214	0.471664	1	0.492223	0
GCST90001924	0.91788	1.0029	0.947704	1.0581	0.515633	1	0.472711	0
GCST90001747	0.918946	0.99599	0.918761	1.07322	1.82461	1	0.176765	0.451938
GCST90001415	0.92064	0.997238	0.942893	1.05158	0.134062	1	0.714257	0
GCST90002109	0.92069	0.995929	0.915787	1.07607	1.74166	1	0.186929	0.425834
GCST90001937	0.921008	1.0045	0.915594	1.0934	1.54769	1	0.213476	0.353878
GCST90001862	0.923892	1.00236	0.954014	1.0507	0.000331494	1	0.985474	0
GCST90001490	0.92477	1.00445	0.912081	1.09682	0.0576715	1	0.810215	0
GCST90001908	0.926188	1.00331	0.933333	1.07328	0.827761	1	0.362921	0
GCST90001633	0.926988	0.997748	0.949581	1.04592	0.814082	1	0.366916	0
GCST90001830	0.929419	0.995787	0.902558	1.08902	0.000446697	1	0.983138	0
GCST90002020	0.93145	1.0045	0.902015	1.10698	1.70949	1	0.191052	0.41503
GCST90001837	0.934799	1.00184	0.957843	1.04583	0.839503	1	0.359539	0
GCST90001925	0.93832	0.997295	0.928783	1.06581	0.00992222	1	0.920654	0
GCST90001578	0.938545	1.00359	0.912375	1.0948	3.80604e-05	1	0.995078	0
GCST90001612	0.938796	0.994909	0.864963	1.12486	2.54326	1	0.110766	0.606804
GCST90001890	0.943369	1.00314	0.916505	1.08978	0.067129	1	0.795564	0
GCST90001685	0.944816	0.996338	0.89264	1.10004	0.573418	1	0.448904	0
GCST90001416	0.945993	1.00104	0.970977	1.0311	0.133607	1	0.714721	0
GCST90001444	0.947805	1.00208	0.939735	1.06443	0.0594518	1	0.807364	0
GCST90001847	0.948018	1.00151	0.956164	1.04685	0.375183	1	0.540193	0
GCST90001955	0.951988	1.00102	0.967704	1.03434	0.114686	1	0.734871	0
GCST90001662	0.953159	1.00063	0.979493	1.02177	0.0380702	1	0.845302	0
GCST90001927	0.955984	1.00194	0.933145	1.07073	0.448311	1	0.503138	0
GCST90002070	0.956115	1.00089	0.969222	1.03256	0.215858	1	0.642215	0
GCST90001943	0.956724	0.999078	0.965776	1.03238	0.00753922	1	0.930808	0
GCST90001909	0.957091	0.998349	0.938208	1.05849	0.125939	1	0.722681	0
GCST90001959	0.957787	0.997877	0.919266	1.07649	0.211217	1	0.645815	0
GCST90001952	0.958463	1.00097	0.964576	1.03736	3.04497e-05	1	0.995597	0
GCST90001567	0.95947	0.998377	0.935774	1.06098	0.593071	1	0.441234	0
GCST90001905	0.962507	1.00139	0.943275	1.05951	0.00444243	1	0.946859	0
GCST90001864	0.962747	1.0012	0.950664	1.05174	0.559662	1	0.454396	0
GCST90001825	0.964437	0.998887	0.949957	1.04782	0.497434	1	0.48063	0
GCST90001569	0.965947	0.995869	0.806241	1.1855	3.14273	1	0.0762662	0.681805
GCST90001458	0.967552	0.999099	0.95569	1.04251	0.532424	1	0.465589	0
GCST90001876	0.967794	0.999342	0.967406	1.03128	0.0250688	1	0.874196	0
GCST90002105	0.968744	1.00064	0.968826	1.03245	0.452129	1	0.501326	0
GCST90001706	0.969728	1.00224	0.886416	1.11807	3.93284	1	0.0473521	0.745731
GCST90001669	0.970829	1.00022	0.988468	1.01197	0.320638	1	0.571225	0
GCST90001635	0.973472	0.998963	0.93783	1.0601	0.289293	1	0.590674	0
GCST90002055	0.973747	1.00136	0.920474	1.08224	0.0216736	1	0.882959	0
GCST90001624	0.97497	1.00059	0.963764	1.03742	0.820627	1	0.364997	0
GCST90001524	0.975387	1.0008	0.949794	1.05181	0.0388871	1	0.843673	0
GCST90001489	0.97627	0.999569	0.971164	1.02797	0.114644	1	0.734917	0
GCST90001557	0.97687	1.00103	0.931108	1.07096	0.00709361	1	0.932879	0
GCST90001732	0.977593	0.999011	0.929998	1.06802	0.148923	1	0.699567	0
GCST90001721	0.977961	0.999058	0.93224	1.06588	0.108873	1	0.741431	0
GCST90002101	0.978423	1.00117	0.916095	1.08625	0.0282994	1	0.866407	0
GCST90001694	0.981048	0.99886	0.904831	1.09289	1.63778	1	0.20063	0.389419
GCST90001564	0.981367	1.00072	0.939985	1.06146	0.735356	1	0.391152	0
GCST90001976	0.982816	0.99911	0.918153	1.08007	0.0282566	1	0.866507	0
GCST90001977	0.985223	1.00053	0.944493	1.05657	0.45809	1	0.498518	0
GCST90001759	0.986417	0.999173	0.903932	1.09441	2.59422	1	0.107254	0.614528
GCST90001854	0.986424	0.999628	0.956795	1.04246	0.00917605	1	0.923686	0
GCST90001946	0.986972	1.00032	0.962212	1.03842	0.394726	1	0.529825	0
GCST90001783	0.988251	0.999309	0.907328	1.09129	0.296017	1	0.58639	0
GCST90001805	0.988274	1.00029	0.961308	1.03928	0.888951	1	0.345762	0
GCST90001880	0.988568	1.00025	0.966173	1.03433	0.251128	1	0.616282	0
GCST90001450	0.989096	0.999702	0.957008	1.0424	0.00120351	1	0.972326	0
GCST90001702	0.990708	0.999684	0.946537	1.05283	1.17148	1	0.279098	0.146376
GCST90001629	0.992038	1.00023	0.955468	1.04499	0.945118	1	0.330965	0
GCST90001969	0.993973	0.999786	0.94425	1.05532	0.190802	1	0.66225	0
GCST90001933	0.996911	0.999926	0.962309	1.03754	0.00096298	1	0.975244	0

## Sheet: S9.2.
The main meta-results for peripheral blood immune factors phenotypes.
id	Random_p-value	Random_OR	Random_95lci	Random_95uci	Q	df.Q	p-value.Q	I2
GCST90274818	0.00136621	0.808485	0.691247	0.925724	0.157271	1	0.691682	0
GCST90274795	0.0153408	1.13461	1.02578	1.24345	0.396813	1	0.52874	0
GCST90274842	0.0532456	0.890505	0.779479	1.00153	0.24376	1	0.621504	0
GCST90274783	0.0578463	0.958485	0.91559	1.00138	0.622291	1	0.430197	0
GCST90274824	0.0786392	0.906687	0.802692	1.01068	0.00169587	1	0.967152	0
GCST90274825	0.0814488	1.10771	0.986547	1.22886	0.455737	1	0.499623	0
GCST90274809	0.0914923	1.14244	0.97701	1.30787	0.0489798	1	0.824848	0
GCST90274822	0.0927419	1.03102	0.994854	1.06719	0.126613	1	0.721969	0
GCST90274773	0.0929918	0.89276	0.767636	1.01788	0.028954	1	0.864885	0
GCST90274831	0.0975846	1.12466	0.977178	1.27215	0.0333685	1	0.855057	0
GCST90274814	0.121732	0.89369	0.759048	1.02833	0.544792	1	0.460453	0
GCST90274767	0.123378	0.876464	0.719316	1.03361	1.67791	1	0.195202	0.404022
GCST90274834	0.140066	0.873388	0.705209	1.04157	0.348153	1	0.555161	0
GCST90274796	0.141121	1.10414	0.965443	1.24284	0.088734	1	0.765793	0
GCST90274812	0.155668	1.12108	0.953933	1.28824	0.604761	1	0.436767	0
GCST90274810	0.166088	1.12717	0.947193	1.30714	0.225242	1	0.635075	0
GCST90274821	0.179961	0.93417	0.837945	1.03039	0.0164968	1	0.897801	0
GCST90274845	0.180691	1.10832	0.949723	1.26691	0.0251117	1	0.874089	0
GCST90274828	0.182241	0.909899	0.777507	1.04229	0.702348	1	0.401996	0
GCST90274785	0.191111	0.920625	0.801622	1.03963	0.199966	1	0.654748	0
GCST90274793	0.20245	1.09297	0.950009	1.23593	0.00167412	1	0.967363	0
GCST90274761	0.207414	0.676909	0.174614	1.1792	3.12661	1	0.077024	0.680164
GCST90274780	0.207661	0.888675	0.715509	1.06184	1.30747	1	0.252854	0.235161
GCST90274764	0.224479	0.919025	0.788368	1.04968	0.0375413	1	0.846367	0
GCST90274819	0.242668	1.07848	0.946828	1.21012	0.83832	1	0.359878	0
GCST90274800	0.244209	0.948874	0.862827	1.03492	0.241264	1	0.623295	0
GCST90274837	0.269104	0.90638	0.740343	1.07242	0.0361511	1	0.849204	0
GCST90274782	0.270539	0.94693	0.852527	1.04133	0.0114804	1	0.914673	0
GCST90274804	0.270896	1.0228	0.982208	1.0634	0.620804	1	0.430748	0
GCST90274802	0.327143	0.930662	0.791971	1.06935	0.692003	1	0.405484	0
GCST90274775	0.329531	1.19463	0.803402	1.58587	4.13308	1	0.0420527	0.75805
GCST90274784	0.345624	1.05882	0.936578	1.18107	0.0684001	1	0.793681	0
GCST90274762	0.362918	0.93292	0.788413	1.07743	0.000365188	1	0.984753	0
GCST90274758	0.365699	0.926979	0.76876	1.0852	0.84294	1	0.358557	0
GCST90274790	0.369324	0.979446	0.934572	1.02432	1.13526	1	0.286656	0.119144
GCST90274827	0.391601	1.15236	0.803802	1.50091	4.04202	1	0.0443808	0.752599
GCST90274774	0.423823	0.983493	0.943042	1.02394	0.136684	1	0.7116	0
GCST90274807	0.428558	0.939444	0.789524	1.08937	0.0414831	1	0.838608	0
GCST90274792	0.433875	1.04835	0.927251	1.16946	0.418615	1	0.517629	0
GCST90274787	0.474882	0.88354	0.564102	1.20298	2.7733	1	0.0958481	0.639419
GCST90274798	0.476047	1.01431	0.974956	1.05366	0.0288929	1	0.865027	0
GCST90274760	0.505771	0.950459	0.804542	1.09638	1.00492	1	0.316123	0.00489512
GCST90274777	0.511348	1.01311	0.973981	1.05224	0.103274	1	0.747936	0
GCST90274835	0.534377	0.925793	0.691714	1.15987	2.3713	1	0.123584	0.57829
GCST90274778	0.539637	1.04574	0.899583	1.19189	1.01463	1	0.313795	0.014422
GCST90274811	0.540078	1.08235	0.818928	1.34576	1.57684	1	0.209216	0.365821
GCST90274786	0.572183	0.962516	0.83245	1.09258	0.924148	1	0.336388	0
GCST90274806	0.583805	1.04234	0.890875	1.1938	0.0205824	1	0.885923	0
GCST90274817	0.592842	0.96555	0.839278	1.09182	0.158925	1	0.690148	0
GCST90274832	0.594996	0.96009	0.812948	1.10723	0.308102	1	0.578848	0
GCST90274829	0.634911	1.03537	0.889366	1.18138	0.109834	1	0.740334	0
GCST90274759	0.637288	1.01139	0.964054	1.05872	1.08393	1	0.29782	0.0774323
GCST90274763	0.639535	1.03359	0.893022	1.17416	0.560168	1	0.454192	0
GCST90274781	0.650496	0.943014	0.696497	1.18953	2.01888	1	0.155354	0.504675
GCST90274839	0.65494	1.08078	0.726507	1.43506	2.75461	1	0.0969744	0.636972
GCST90274846	0.665662	0.976906	0.872155	1.08166	0.0883521	1	0.766283	0
GCST90274823	0.666176	1.02755	0.902375	1.15273	0.0256415	1	0.872779	0
GCST90274789	0.669867	0.972094	0.843804	1.10038	0.22737	1	0.633481	0
GCST90274816	0.671182	1.0438	0.841575	1.24603	0.000710255	1	0.978738	0
GCST90274770	0.683888	1.01669	0.936346	1.09704	0.0195169	1	0.888895	0
GCST90274813	0.691408	1.03022	0.881006	1.17943	0.00116408	1	0.972783	0
GCST90274769	0.707782	1.02691	0.886205	1.16761	1.02694	1	0.310878	0.0262348
GCST90274833	0.715002	1.04689	0.795215	1.29856	2.82109	1	0.0930333	0.645527
GCST90274844	0.715324	0.983627	0.895642	1.07161	0.134452	1	0.71386	0
GCST90274838	0.71862	0.97367	0.830438	1.1169	0.000880686	1	0.976325	0
GCST90274766	0.735329	1.02276	0.890818	1.15469	0.621417	1	0.430521	0
GCST90274765	0.736041	0.934032	0.550479	1.31758	5.22007	1	0.0223277	0.808432
GCST90274805	0.738899	1.031	0.848702	1.2133	0.322929	1	0.569853	0
GCST90274841	0.759244	1.03907	0.789222	1.28891	2.41957	1	0.119828	0.586703
GCST90274772	0.763894	1.02447	0.864788	1.18416	1.7813	1	0.18199	0.438613
GCST90274843	0.777857	0.980936	0.848491	1.11338	1.36845	1	0.242079	0.269245
GCST90274803	0.785231	0.985094	0.877882	1.09231	0.06872	1	0.79321	0
GCST90274794	0.80679	1.0288	0.798022	1.25957	1.3408	1	0.246893	0.254177
GCST90274776	0.812394	0.964473	0.671088	1.25786	2.11662	1	0.145708	0.527549
GCST90274815	0.822884	0.885394	-0.118116	1.8889	8.5399	1	0.00347444	0.882903
GCST90274779	0.842758	0.987742	0.86663	1.10885	0.110741	1	0.739302	0
GCST90274771	0.848827	0.988939	0.875212	1.10267	0.0181443	1	0.892848	0
GCST90274791	0.885429	0.990359	0.859225	1.12149	1.00673	1	0.315687	0.00668724
GCST90274836	0.892951	0.99249	0.883106	1.10187	0.0546595	1	0.815145	0
GCST90274797	0.893693	1.00551	0.924721	1.0863	0.216064	1	0.642056	0
GCST90274847	0.950558	0.995608	0.856794	1.13442	1.05142	1	0.305179	0.0489084
GCST90274808	0.956166	1.00442	0.846751	1.16209	0.462825	1	0.496307	0
GCST90274820	0.957075	0.990047	0.627598	1.3525	3.86649	1	0.0492593	0.741368
GCST90274788	0.958262	0.996233	0.855141	1.13732	0.622983	1	0.429941	0
GCST90274830	0.961843	0.995933	0.829303	1.16256	0.0675594	1	0.794924	0
GCST90274801	0.976089	1.00293	0.811226	1.19464	0.000306266	1	0.986037	0
GCST90274848	0.980028	0.998883	0.911403	1.08636	0.129854	1	0.718584	0
GCST90274840	0.982489	0.999521	0.956789	1.04225	1.1225	1	0.289381	0.10913
GCST90274768	0.983884	1.00078	0.925083	1.07648	2.19378	1	0.138569	0.544166
GCST90274799	0.987021	0.998844	0.859581	1.13811	0.197355	1	0.656864	0
GCST90274826	0.997077	1.00025	0.866569	1.13393	0.46726	1	0.494251	0

## Sheet: S9.3.
The main meta-results for peripheral blood metabolites phenotypes.
id	Random_p-value	Random_OR	Random_95lci	Random_95uci	Q	df.Q	p-value.Q	I2
GCST90200126	0.000420022	1.199	1.08842	1.30957	0.206822	1	0.64927	0
GCST90200042	0.0021502	1.07766	1.02806	1.12726	0.337481	1	0.561287	0
GCST90200133	0.00356006	0.850792	0.750459	0.951125	0.0874265	1	0.767475	0
GCST90200097	0.00489048	1.17198	1.0522	1.29176	0.0842478	1	0.771621	0
GCST90200190	0.00713324	1.06652	1.01806	1.11497	0.226741	1	0.633951	0
GCST90200480	0.00826361	0.870475	0.774355	0.966596	0.0856172	1	0.769825	0
GCST90199831	0.00870942	1.14943	1.03778	1.26108	0.395958	1	0.529184	0
GCST90199784	0.00888712	1.12287	1.03083	1.21491	0.0282401	1	0.866546	0
GCST90200763	0.00922218	0.857756	0.750681	0.964832	0.45075	1	0.501979	0
GCST90200311	0.0100478	0.867316	0.766291	0.968341	0.0187566	1	0.891067	0
GCST90199622	0.0125002	0.894933	0.812487	0.97738	0.482079	1	0.487482	0
GCST90200045	0.0135993	1.0905	1.01862	1.16238	0.530897	1	0.46623	0
GCST90200711	0.0136393	1.14312	1.0294	1.25684	1.47879	1	0.223964	0.323772
GCST90200721	0.0147429	0.893652	0.808179	0.979125	0.0929436	1	0.760468	0
GCST90200445	0.0150195	1.07348	1.01426	1.13269	0.0200572	1	0.887378	0
GCST90200247	0.0178613	1.14372	1.02479	1.26266	0.812316	1	0.367437	0
GCST90200726	0.0188843	0.917101	0.847897	0.986306	0.133718	1	0.714607	0
GCST90199682	0.019051	0.889622	0.797349	0.981895	0.751645	1	0.385956	0
GCST90200842	0.0200153	0.832865	0.692036	0.973695	0.00377217	1	0.951026	0
GCST90200855	0.0211799	0.881995	0.781645	0.982346	0.0336992	1	0.854348	0
GCST90200370	0.021365	0.82901	0.683392	0.974627	0.00184813	1	0.96571	0
GCST90199984	0.0218976	1.11417	1.01655	1.2118	0.593846	1	0.440936	0
GCST90200092	0.0249804	1.0985	1.01238	1.18462	0.0199562	1	0.887659	0
GCST90200787	0.0252471	0.91881	0.847694	0.989926	0.00152558	1	0.968844	0
GCST90200997	0.0258024	1.11835	1.01429	1.2224	0.0167524	1	0.897017	0
GCST90199632	0.026896	1.13107	1.01499	1.24714	0.0504062	1	0.822358	0
GCST90200374	0.0271893	1.13974	1.01574	1.26373	0.0162616	1	0.898528	0
GCST90199936	0.0278031	0.9051	0.820557	0.989644	0.293855	1	0.587761	0
GCST90200337	0.028392	1.14813	1.01567	1.28059	0.235092	1	0.627774	0
GCST90200531	0.0308669	0.823548	0.663346	0.983749	0.867683	1	0.351597	0
GCST90200063	0.0313046	1.11399	1.01023	1.21775	0.37112	1	0.542395	0
GCST90199636	0.0325034	0.887636	0.784637	0.990635	0.476971	1	0.489798	0
GCST90200351	0.0332708	0.900531	0.808951	0.992111	0.298759	1	0.584662	0
GCST90199644	0.0335201	0.866831	0.74405	0.989611	0.329985	1	0.565668	0
GCST90199947	0.0345583	1.22364	1.01625	1.43104	0.367989	1	0.544102	0
GCST90200615	0.0357235	1.13812	1.00921	1.26703	0.192385	1	0.660939	0
GCST90199760	0.0357637	0.910976	0.827872	0.994079	0.815983	1	0.366357	0
GCST90200936	0.0363032	0.854193	0.717687	0.990699	0.669832	1	0.41311	0
GCST90200990	0.0364747	1.07917	1.00498	1.15337	0.275655	1	0.599564	0
GCST90200684	0.0366641	0.908561	0.822791	0.994332	0.126746	1	0.72183	0
GCST90200206	0.0368246	1.12687	1.00776	1.24598	0.0293525	1	0.863968	0
GCST90200896	0.0377172	1.10758	1.00611	1.20905	0.00645552	1	0.935962	0
GCST90200478	0.0387715	1.13116	1.00677	1.25555	0.0203884	1	0.886458	0
GCST90200984	0.039219	1.22448	1.0111	1.43787	0.320777	1	0.571141	0
GCST90200848	0.0418105	1.15253	1.00565	1.29941	0.087133	1	0.767854	0
GCST90200387	0.0420644	1.09498	1.00341	1.18655	0.0866745	1	0.768448	0
GCST90199717	0.042478	0.906223	0.815629	0.996818	0.148885	1	0.699603	0
GCST90199850	0.0427129	0.933698	0.869573	0.997823	0.623413	1	0.429782	0
GCST90200264	0.0430706	1.07316	1.00228	1.14404	0.474154	1	0.491082	0
GCST90200249	0.0432907	1.06386	1.00193	1.12579	0.000100616	1	0.991997	0
GCST90200393	0.0440962	0.808116	0.621304	0.994928	1.49717	1	0.221107	0.332075
GCST90199830	0.0441115	0.880582	0.764311	0.996852	0.265892	1	0.606101	0
GCST90200623	0.0475638	1.11253	1.00121	1.22384	0.933971	1	0.333833	0
GCST90200797	0.0476989	1.11266	1.00114	1.22418	0.354237	1	0.551725	0
GCST90200989	0.0498397	0.919241	0.838538	0.999943	0.0897781	1	0.764459	0
GCST90200654	0.0498451	1.11055	1.00007	1.22102	0.000963668	1	0.975235	0
GCST90200306	0.0519975	1.13188	0.998859	1.26491	0.0354403	1	0.850676	0
GCST90200866	0.0543727	0.890236	0.778412	1.00206	1.32204	1	0.250226	0.243594
GCST90200175	0.0546576	0.897478	0.792909	1.00205	0.113148	1	0.736588	0
GCST90200071	0.0561341	1.13297	0.996521	1.26942	0.0362926	1	0.848913	0
GCST90200267	0.0567109	0.890708	0.778294	1.00312	0.765508	1	0.38161	0
GCST90199703	0.0570543	0.929167	0.856209	1.00212	0.008464	1	0.926698	0
GCST90200232	0.0574297	0.934422	0.866775	1.00207	0.0377139	1	0.846019	0
GCST90200129	0.0633879	1.13126	0.992682	1.26983	0.0566082	1	0.811939	0
GCST90200196	0.0640907	0.895381	0.784636	1.00613	0.160128	1	0.689039	0
GCST90200079	0.0670098	1.08048	0.99436	1.16661	0.545496	1	0.460164	0
GCST90200513	0.0673738	0.867782	0.726111	1.00945	0.0286717	1	0.865539	0
GCST90200849	0.0686624	1.08788	0.993275	1.18248	0.88872	1	0.345824	0
GCST90199780	0.0689108	1.10293	0.992024	1.21383	0.86155	1	0.353305	0
GCST90199763	0.0694186	1.08668	0.993113	1.18024	0.00250242	1	0.960103	0
GCST90200441	0.0703362	1.1185	0.990164	1.24683	0.83593	1	0.360563	0
GCST90200244	0.0704245	0.909496	0.811448	1.00754	0.0416562	1	0.838277	0
GCST90200550	0.0729446	0.915591	0.823331	1.00785	0.281517	1	0.595709	0
GCST90199702	0.0732604	0.886992	0.763337	1.01065	0.0392257	1	0.843002	0
GCST90200825	0.073414	1.11448	0.989148	1.23981	0.0772249	1	0.781094	0
GCST90200830	0.0758168	0.904208	0.798463	1.00995	0.0222262	1	0.881487	0
GCST90199737	0.0761563	1.11921	0.987462	1.25096	0.0167914	1	0.896897	0
GCST90199645	0.0761579	1.09948	0.989536	1.20942	0.173506	1	0.677014	0
GCST90200852	0.0762834	1.12252	0.987055	1.25798	0.0374433	1	0.846565	0
GCST90199810	0.0764879	1.10758	0.988551	1.22661	0.74882	1	0.38685	0
GCST90199709	0.0773602	1.05589	0.993869	1.1179	0.742843	1	0.388752	0
GCST90199920	0.0793876	1.14323	0.983204	1.30325	0.441419	1	0.506438	0
GCST90200341	0.0794393	1.13145	0.984561	1.27833	0.143422	1	0.704903	0
GCST90200251	0.0804753	1.08122	0.990148	1.17229	0.267699	1	0.60488	0
GCST90199843	0.081502	0.894078	0.774905	1.01325	0.526089	1	0.468256	0
GCST90199729	0.0823514	1.16055	0.979413	1.34168	1.34252	1	0.24659	0.255131
GCST90200376	0.082505	0.936942	0.865763	1.00812	0.648796	1	0.420543	0
GCST90199896	0.0849854	0.906829	0.800812	1.01285	0.901928	1	0.342265	0
GCST90199680	0.0859493	1.12299	0.98261	1.26337	0.284071	1	0.594045	0
GCST90199824	0.0908092	0.908896	0.803309	1.01448	0.46738	1	0.494195	0
GCST90199989	0.0911198	0.877806	0.736053	1.01956	2.59313e-06	1	0.998715	0
GCST90200402	0.0912729	1.06663	0.989298	1.14396	0.0864483	1	0.768742	0
GCST90200728	0.0925383	1.09573	0.98419	1.20727	0.20437	1	0.651216	0
GCST90199777	0.0936481	0.900626	0.784447	1.01681	0.139126	1	0.709152	0
GCST90200269	0.0937717	1.05609	0.990491	1.12168	0.051302	1	0.820813	0
GCST90200800	0.0960556	1.09974	0.982279	1.21721	0.387881	1	0.533415	0
GCST90200631	0.0960714	1.09486	0.983142	1.20657	0.00610242	1	0.937734	0
GCST90200065	0.0969293	1.09082	0.983583	1.19807	0.985045	1	0.320956	0
GCST90199968	0.0970825	1.08712	0.984205	1.19004	0.902425	1	0.342132	0
GCST90199704	0.0976005	1.12055	0.977924	1.26318	1.13639	1	0.286417	0.12002
GCST90200033	0.0983321	1.11843	0.978008	1.25884	0.331399	1	0.564837	0
GCST90199921	0.0990911	1.14049	0.973535	1.30744	0.0370902	1	0.847282	0
GCST90199818	0.0997554	1.0904	0.982759	1.19804	0.852399	1	0.355874	0
GCST90199999	0.0999325	0.892051	0.763448	1.02065	0.0641939	1	0.799986	0
GCST90200876	0.103165	1.05829	0.988187	1.1284	0.156279	1	0.692605	0
GCST90200995	0.103629	1.12319	0.974836	1.27154	1.01682	1	0.313274	0.0165457
GCST90200283	0.104123	1.10791	0.977771	1.23805	0.498469	1	0.480174	0
GCST90200044	0.107938	1.12591	0.972397	1.27941	0.0143145	1	0.904766	0
GCST90200275	0.108171	1.07557	0.983371	1.16777	0.828808	1	0.362617	0
GCST90200939	0.108349	1.10177	0.977543	1.226	0.00289561	1	0.957086	0
GCST90200177	0.110239	0.846659	0.658481	1.03484	0.419864	1	0.517005	0
GCST90200987	0.11242	0.840099	0.642671	1.03753	1.57291	1	0.209785	0.364235
GCST90200179	0.112797	1.05075	0.988022	1.11349	0.0059294	1	0.938621	0
GCST90199805	0.114225	1.09418	0.977312	1.21105	0.290405	1	0.589961	0
GCST90200214	0.114292	0.912139	0.803094	1.02118	0.00154782	1	0.968617	0
GCST90200944	0.116502	1.10753	0.97326	1.24179	0.242178	1	0.622638	0
GCST90199858	0.11899	0.953735	0.895572	1.0119	0.0393154	1	0.842825	0
GCST90200015	0.119667	1.05813	0.984916	1.13135	0.0468244	1	0.828684	0
GCST90200076	0.12041	1.09012	0.976388	1.20385	1.84719e-05	1	0.996571	0
GCST90200792	0.122099	1.07442	0.980074	1.16877	0.138935	1	0.709343	0
GCST90200377	0.12337	1.07244	0.980293	1.16458	0.489909	1	0.483968	0
GCST90200038	0.123882	0.890702	0.751479	1.02993	1.09194	1	0.296043	0.0841954
GCST90200775	0.125349	0.887295	0.743171	1.03142	0.310182	1	0.577568	0
GCST90199667	0.126164	1.03869	0.989109	1.08827	0.0498306	1	0.823358	0
GCST90200322	0.129952	1.07542	0.977802	1.17304	0.000192179	1	0.988939	0
GCST90200538	0.130702	0.903369	0.778053	1.02868	0.0550636	1	0.814476	0
GCST90200036	0.130764	0.932589	0.845153	1.02002	0.291857	1	0.589033	0
GCST90200114	0.132819	1.07773	0.976373	1.17909	0.0528945	1	0.818101	0
GCST90199732	0.132998	1.07451	0.977307	1.17171	0.00453945	1	0.946283	0
GCST90200408	0.133803	0.899038	0.767054	1.03102	0.0418525	1	0.837901	0
GCST90199972	0.135659	0.844039	0.639182	1.0489	0.717722	1	0.396892	0
GCST90199639	0.137874	0.93878	0.857911	1.01965	1.2229	1	0.268792	0.182273
GCST90200999	0.138709	1.11456	0.962913	1.2662	0.00913609	1	0.923852	0
GCST90200604	0.140803	0.924316	0.823598	1.02503	1.05593	1	0.304145	0.0529696
GCST90200469	0.143153	0.897671	0.76069	1.03465	0.256134	1	0.612789	0
GCST90200132	0.145415	1.08889	0.969226	1.20856	0.00492899	1	0.944029	0
GCST90200002	0.14628	0.893351	0.749472	1.03723	0.646711	1	0.421291	0
GCST90200211	0.148024	0.917911	0.806685	1.02914	0.737204	1	0.390558	0
GCST90199859	0.149708	1.06939	0.97498	1.16381	0.186468	1	0.665873	0
GCST90200537	0.149932	1.06825	0.975342	1.16115	0.331184	1	0.564963	0
GCST90201017	0.150452	0.891202	0.742907	1.0395	0.176882	1	0.674066	0
GCST90200667	0.150585	1.11759	0.95726	1.27791	0.184048	1	0.667917	0
GCST90200546	0.151222	0.907957	0.782263	1.03365	0.712539	1	0.398602	0
GCST90200128	0.151676	1.10948	0.959808	1.25914	0.0723335	1	0.787969	0
GCST90199795	0.151916	1.10172	0.962576	1.24086	0.0713336	1	0.789405	0
GCST90199671	0.152732	0.87512	0.703952	1.04629	0.011131	1	0.915976	0
GCST90200730	0.153307	0.94201	0.862414	1.02161	0.430742	1	0.511625	0
GCST90199960	0.154289	0.935489	0.846731	1.02425	0.0345962	1	0.852444	0
GCST90200345	0.155287	0.930307	0.834188	1.02643	0.941233	1	0.331961	0
GCST90200162	0.156109	1.0931	0.964444	1.22175	1.11331	1	0.291363	0.101778
GCST90200891	0.156627	1.07856	0.96986	1.18726	0.0279314	1	0.86727	0
GCST90199987	0.157771	0.927778	0.827572	1.02798	0.96209	1	0.326661	0
GCST90200084	0.158213	1.13663	0.946855	1.32641	1.02172	1	0.312112	0.0212546
GCST90199735	0.15975	1.05446	0.978537	1.13039	0.0423885	1	0.836881	0
GCST90199886	0.159753	1.05347	0.978929	1.128	0.692171	1	0.405427	0
GCST90199769	0.15981	0.909856	0.784169	1.03554	0.42298	1	0.515454	0
GCST90200472	0.162014	0.914357	0.794315	1.0344	0.266996	1	0.605354	0
GCST90200240	0.162688	0.920907	0.809869	1.03195	0.385509	1	0.53467	0
GCST90200965	0.162901	0.910363	0.784458	1.03627	0.647192	1	0.421118	0
GCST90200438	0.163943	1.09314	0.961992	1.22428	0.00934539	1	0.922987	0
GCST90200974	0.167236	0.910964	0.784614	1.03731	0.0293996	1	0.86386	0
GCST90200511	0.167285	1.12563	0.94733	1.30392	0.379522	1	0.537859	0
GCST90200963	0.167302	0.702884	0.281185	1.12458	6.39541	1	0.0114416	0.843638
GCST90200104	0.167591	1.11612	0.951199	1.28103	0.0726354	1	0.787538	0
GCST90200226	0.170552	0.912536	0.787446	1.03763	0.518896	1	0.471313	0
GCST90200412	0.172733	0.858688	0.655554	1.06182	1.41608	1	0.234049	0.293826
GCST90200272	0.173016	1.10434	0.954257	1.25442	0.884599	1	0.346945	0
GCST90200258	0.174351	0.92523	0.817345	1.03312	0.000707683	1	0.978777	0
GCST90199757	0.174947	1.07594	0.966215	1.18567	0.117799	1	0.731434	0
GCST90200957	0.175237	1.061	0.972804	1.14919	0.497329	1	0.480676	0
GCST90200360	0.177326	1.1051	0.952406	1.25778	0.0565309	1	0.812065	0
GCST90199800	0.178378	1.07708	0.964823	1.18933	0.70271	1	0.401874	0
GCST90199866	0.18123	1.04145	0.980684	1.10222	0.514248	1	0.473306	0
GCST90199725	0.181631	0.894152	0.73884	1.04946	1.78917	1	0.181027	0.441082
GCST90199711	0.182489	1.14878	0.930043	1.36752	1.52391	1	0.217029	0.343794
GCST90200220	0.182921	0.919047	0.799914	1.03818	0.643649	1	0.422392	0
GCST90200594	0.183967	0.950336	0.877074	1.0236	0.378094	1	0.538625	0
GCST90200811	0.184293	1.13147	0.937384	1.32557	1.64905	1	0.199088	0.39359
GCST90199976	0.184611	1.08018	0.961728	1.19863	0.573991	1	0.448677	0
GCST90200062	0.18479	1.08332	0.960179	1.20646	0.114219	1	0.735391	0
GCST90200471	0.185221	1.1406	0.932599	1.3486	2.50239	1	0.113674	0.600382
GCST90200054	0.186038	1.0647	0.968805	1.1606	0.668328	1	0.413635	0
GCST90199666	0.18619	0.933439	0.834753	1.03213	0.00105467	1	0.974093	0
GCST90200556	0.187182	1.05739	0.972108	1.14267	0.0635584	1	0.800958	0
GCST90200066	0.188112	0.900654	0.752715	1.04859	0.00502044	1	0.943513	0
GCST90200271	0.191467	1.05561	0.97217	1.13905	0.125687	1	0.722947	0
GCST90200835	0.19176	1.05746	0.971188	1.14373	0.0643597	1	0.799733	0
GCST90199656	0.192693	0.691292	0.226812	1.15577	5.16488	1	0.023048	0.806385
GCST90200450	0.194214	1.0617	0.968551	1.15484	0.010966	1	0.916599	0
GCST90199664	0.196457	1.06864	0.964491	1.17278	0.792621	1	0.373309	0
GCST90200003	0.196741	1.09215	0.952238	1.23206	0.847417	1	0.357284	0
GCST90200474	0.198197	0.929036	0.820942	1.03713	0.151295	1	0.6973	0
GCST90200524	0.198623	1.0664	0.965163	1.16763	8.94817e-08	1	0.999761	0
GCST90200462	0.200146	0.924439	0.80884	1.04004	0.233991	1	0.628581	0
GCST90200978	0.201776	1.06232	0.966635	1.158	0.973133	1	0.3239	0
GCST90200256	0.202664	0.977212	0.942153	1.01227	0.173285	1	0.677208	0
GCST90200465	0.20311	0.939484	0.846292	1.03268	1.05489	1	0.304383	0.0520375
GCST90200336	0.204158	1.08912	0.951561	1.22668	0.671254	1	0.412615	0
GCST90200659	0.204681	0.94333	0.855758	1.0309	0.116344	1	0.733035	0
GCST90200783	0.20489	0.903561	0.754464	1.05266	0.250035	1	0.617051	0
GCST90199663	0.207002	0.927849	0.815781	1.03992	0.719632	1	0.396265	0
GCST90200292	0.207353	1.10331	0.942719	1.2639	0.502722	1	0.478307	0
GCST90200670	0.209603	1.06811	0.961711	1.17451	0.692281	1	0.405389	0
GCST90199771	0.209735	1.09062	0.949017	1.23222	0.0350012	1	0.851593	0
GCST90200039	0.211132	1.06874	0.960998	1.17648	0.112168	1	0.737689	0
GCST90199839	0.211256	0.951973	0.876674	1.02727	0.263557	1	0.607687	0
GCST90200118	0.215077	1.07187	0.958249	1.18548	0.0222917	1	0.881314	0
GCST90200612	0.218148	0.915774	0.781722	1.04983	0.787141	1	0.374966	0
GCST90200577	0.218288	0.940912	0.846841	1.03498	0.0442866	1	0.833321	0
GCST90199752	0.219669	0.963068	0.904094	1.02204	0.570278	1	0.450149	0
GCST90199643	0.21987	0.921538	0.796194	1.04688	0.403676	1	0.525197	0
GCST90200661	0.221992	0.925287	0.80538	1.04519	0.803994	1	0.369902	0
GCST90199917	0.223357	1.0548	0.966591	1.14301	0.0542061	1	0.8159	0
GCST90200777	0.223497	0.923193	0.799525	1.04686	0.254809	1	0.613709	0
GCST90201001	0.224689	1.08446	0.948122	1.22079	0.512805	1	0.473927	0
GCST90200717	0.224869	1.06581	0.959535	1.17208	1.072	1	0.300495	0.0671599
GCST90199814	0.225707	1.06982	0.956864	1.18278	1.00719	1	0.315577	0.00713653
GCST90199924	0.225808	1.07588	0.953092	1.19867	1.29012	1	0.256026	0.224879
GCST90200799	0.227224	0.943981	0.853057	1.03491	0.866973	1	0.351795	0
GCST90200870	0.227319	0.930635	0.818027	1.04324	0.257345	1	0.61195	0
GCST90200009	0.228035	1.06504	0.959291	1.17078	0.549377	1	0.458572	0
GCST90200265	0.229158	1.05803	0.963446	1.15262	0.168262	1	0.681661	0
GCST90200485	0.230078	0.910915	0.765431	1.0564	0.128848	1	0.71963	0
GCST90200533	0.231949	0.910699	0.764276	1.05712	0.116974	1	0.73234	0
GCST90199877	0.231998	0.918987	0.78614	1.05183	0.402609	1	0.525745	0
GCST90199899	0.232093	0.934051	0.825885	1.04222	0.0984312	1	0.75372	0
GCST90199775	0.232553	1.06696	0.95703	1.17688	0.102543	1	0.748799	0
GCST90200588	0.232867	1.06971	0.955186	1.18423	0.000717272	1	0.978634	0
GCST90200814	0.234154	1.08707	0.943633	1.2305	0.429017	1	0.512472	0
GCST90200075	0.234352	1.11223	0.927265	1.29719	1.48124	1	0.223581	0.32489
GCST90200514	0.235082	1.16739	0.891085	1.44369	2.72309	1	0.0989061	0.632771
GCST90200426	0.235269	1.06091	0.960326	1.1615	0.216868	1	0.641437	0
GCST90200248	0.23757	1.06601	0.956467	1.17556	0.117559	1	0.731697	0
GCST90200600	0.237803	0.911037	0.763332	1.05874	0.575171	1	0.448211	0
GCST90200962	0.238331	1.08419	0.944255	1.22412	0.855686	1	0.354949	0
GCST90200423	0.239552	0.928264	0.808717	1.04781	0.0941581	1	0.758956	0
GCST90200784	0.240535	0.928644	0.809482	1.04781	0.0266306	1	0.87037	0
GCST90199879	0.243	1.02562	0.982614	1.06862	0.126371	1	0.722225	0
GCST90200499	0.243819	0.929427	0.810747	1.04811	0.129317	1	0.719141	0
GCST90200764	0.243879	0.845793	0.586435	1.10515	2.66694	1	0.102453	0.625039
GCST90199675	0.243994	1.05073	0.965388	1.13607	0.202846	1	0.652433	0
GCST90200822	0.245734	0.928924	0.808914	1.04894	0.191683	1	0.66152	0
GCST90200933	0.245763	1.08844	0.939102	1.23777	1.2397	1	0.265529	0.193353
GCST90200605	0.246083	0.940691	0.840474	1.04091	0.727042	1	0.393844	0
GCST90200340	0.246145	0.928892	0.808721	1.04906	0.169724	1	0.680357	0
GCST90199945	0.247246	0.856334	0.612976	1.09969	3.7278	1	0.0535138	0.731745
GCST90200640	0.250765	1.06141	0.956613	1.1662	0.0731515	1	0.786802	0
GCST90200413	0.251354	0.938994	0.834755	1.04323	0.0433826	1	0.835006	0
GCST90200112	0.253227	1.1045	0.925238	1.28376	0.0021437	1	0.963071	0
GCST90200596	0.253632	0.93915	0.834677	1.04362	0.682437	1	0.408749	0
GCST90200502	0.256766	1.11564	0.915787	1.31548	2.17926	1	0.139882	0.541128
GCST90200878	0.257263	0.932654	0.816142	1.04917	0.0156903	1	0.900317	0
GCST90199804	0.257691	0.924011	0.792426	1.0556	0.352533	1	0.552682	0
GCST90200085	0.258462	1.06362	0.953279	1.17395	0.256551	1	0.6125	0
GCST90200913	0.261883	0.959489	0.888719	1.03026	0.28499	1	0.593449	0
GCST90199907	0.262514	1.08421	0.93691	1.2315	0.0431426	1	0.835457	0
GCST90200898	0.262714	1.07937	0.940475	1.21826	0.437142	1	0.508505	0
GCST90200293	0.262816	0.923822	0.790483	1.05716	0.00914307	1	0.923823	0
GCST90200172	0.263622	0.939281	0.832823	1.04574	0.6128	1	0.433736	0
GCST90199862	0.265529	1.06386	0.951444	1.17628	0.139732	1	0.708548	0
GCST90201003	0.267074	0.862919	0.620832	1.10501	1.69458	1	0.192998	0.409883
GCST90200052	0.267392	1.05331	0.959101	1.14752	0.0565315	1	0.812065	0
GCST90200565	0.267895	1.18666	0.856453	1.51686	4.07955	1	0.0434051	0.754875
GCST90200434	0.268593	1.06678	0.948471	1.18509	0.0333563	1	0.855083	0
GCST90199754	0.270327	0.921796	0.782746	1.06085	0.0729851	1	0.787039	0
GCST90200827	0.270533	0.915738	0.765852	1.06562	0.210127	1	0.646668	0
GCST90199690	0.270815	0.911654	0.75441	1.0689	0.460786	1	0.497257	0
GCST90199811	0.272219	1.03538	0.972222	1.09854	0.557968	1	0.45508	0
GCST90200089	0.272484	1.04782	0.962411	1.13323	0.92891	1	0.335146	0
GCST90200663	0.273581	0.935017	0.818688	1.05135	0.0011747	1	0.972659	0
GCST90200011	0.276395	1.07282	0.94169	1.20396	0.309988	1	0.577687	0
GCST90199686	0.276563	1.07144	0.942754	1.20012	0.189866	1	0.663028	0
GCST90199931	0.277457	1.06618	0.946747	1.18561	0.0671828	1	0.795484	0
GCST90200915	0.279115	0.902569	0.726131	1.07901	0.239877	1	0.624295	0
GCST90200049	0.279454	0.94793	0.853568	1.04229	0.5169	1	0.472167	0
GCST90200007	0.280141	1.07361	0.94002	1.20721	0.0438617	1	0.834111	0
GCST90200259	0.281465	1.07829	0.935816	1.22077	0.0991896	1	0.752804	0
GCST90200332	0.281677	0.815566	0.47979	1.15134	4.78123	1	0.0287716	0.790849
GCST90200655	0.282425	0.900517	0.71912	1.08192	0.0199392	1	0.887707	0
GCST90199698	0.282701	1.03348	0.972394	1.09457	0.891083	1	0.345184	0
GCST90199753	0.282721	1.07073	0.94168	1.19978	0.527466	1	0.467674	0
GCST90200553	0.284284	1.04895	0.959347	1.13856	0.244197	1	0.621191	0
GCST90200851	0.285274	1.06271	0.947683	1.17774	0.248016	1	0.618475	0
GCST90199869	0.285699	1.15927	0.866877	1.45165	2.10716	1	0.146611	0.525428
GCST90199892	0.286059	1.08509	0.92876	1.24142	1.14912	1	0.283733	0.129771
GCST90200972	0.28636	1.07547	0.936729	1.21421	0.65545	1	0.418171	0
GCST90200892	0.287519	1.07034	0.940716	1.19997	0.0936605	1	0.759574	0
GCST90200931	0.288335	0.830921	0.518815	1.14303	2.89329	1	0.0889491	0.654373
GCST90200278	0.288987	1.08044	0.931755	1.22912	0.591574	1	0.441811	0
GCST90200321	0.289011	1.07801	0.933807	1.22221	0.156034	1	0.692835	0
GCST90200463	0.290242	0.939357	0.82697	1.05174	0.177619	1	0.673428	0
GCST90200282	0.29223	1.06744	0.941945	1.19293	0.973593	1	0.323786	0
GCST90200378	0.293187	1.2166	0.812732	1.62047	3.69876	1	0.0544528	0.729639
GCST90200392	0.293266	0.904674	0.726903	1.08245	3.76331	1	0.0523889	0.734276
GCST90199773	0.293525	0.925275	0.785846	1.0647	0.833786	1	0.36118	0
GCST90200081	0.29369	1.17682	0.846778	1.50687	2.00718	1	0.156556	0.50179
GCST90200714	0.295967	0.929956	0.798599	1.06131	0.543816	1	0.460856	0
GCST90200143	0.296742	1.0503	0.955815	1.14479	0.640756	1	0.423437	0
GCST90200147	0.296927	0.946775	0.84676	1.04679	0.319999	1	0.571608	0
GCST90200780	0.296994	0.911437	0.744996	1.07788	0.190002	1	0.662915	0
GCST90200034	0.297031	1.12981	0.885833	1.37379	1.61925	1	0.203196	0.382431
GCST90199631	0.297695	0.911391	0.744624	1.07816	0.515334	1	0.472839	0
GCST90200853	0.2979	1.07448	0.934246	1.21471	0.276667	1	0.598894	0
GCST90200881	0.298983	1.06077	0.946092	1.17545	0.0348738	1	0.85186	0
GCST90200699	0.299414	1.04127	0.963317	1.11923	0.226883	1	0.633844	0
GCST90200691	0.299448	0.918431	0.764354	1.07251	2.24123	1	0.134374	0.553817
GCST90199852	0.300726	0.949423	0.853635	1.04521	0.255504	1	0.613226	0
GCST90200693	0.301111	1.06705	0.939963	1.19413	1.70253	1	0.191958	0.412639
GCST90200569	0.301235	1.06979	0.937473	1.20211	0.178301	1	0.672837	0
GCST90200174	0.301928	1.04581	0.958833	1.13279	0.537423	1	0.463503	0
GCST90199938	0.30239	1.13416	0.879194	1.38913	2.30337	1	0.129094	0.565854
GCST90200497	0.307149	0.91891	0.76328	1.07454	0.962426	1	0.326576	0
GCST90199748	0.307247	0.926379	0.785054	1.0677	0.0185687	1	0.89161	0
GCST90200188	0.309065	1.06272	0.941865	1.18358	0.285786	1	0.592934	0
GCST90200115	0.309085	1.05672	0.947423	1.16602	0.0720801	1	0.788332	0
GCST90200194	0.309132	0.890311	0.678927	1.10169	0.0396791	1	0.842109	0
GCST90200101	0.309576	1.04905	0.954436	1.14367	0.0159618	1	0.899463	0
GCST90200964	0.311203	0.923682	0.775977	1.07139	0.897942	1	0.343334	0
GCST90200437	0.311843	1.14729	0.86185	1.43273	2.06817	1	0.150402	0.51648
GCST90200885	0.311969	1.08936	0.916143	1.26257	1.51381	1	0.218559	0.339415
GCST90200802	0.3133	0.946106	0.841348	1.05086	0.00204206	1	0.963957	0
GCST90200372	0.313421	0.940138	0.82375	1.05653	0.01971	1	0.88835	0
GCST90200833	0.31419	0.945994	0.840823	1.05116	0.0933991	1	0.7599	0
GCST90200105	0.314433	1.05211	0.950578	1.15365	0.94133	1	0.331936	0
GCST90199726	0.315556	1.08126	0.922565	1.23996	0.0173911	1	0.895083	0
GCST90200367	0.315888	1.08261	0.921176	1.24404	0.60151	1	0.438003	0
GCST90199782	0.317039	0.939026	0.819585	1.05847	0.0634874	1	0.801066	0
GCST90200626	0.317249	0.96031	0.882528	1.03809	0.650344	1	0.41999	0
GCST90200268	0.317252	1.05231	0.949796	1.15482	0.00260163	1	0.959321	0
GCST90199724	0.317439	1.07638	0.926634	1.22613	0.052256	1	0.819183	0
GCST90199815	0.31755	0.890439	0.675596	1.10528	2.59953	1	0.106896	0.615315
GCST90200609	0.317621	0.939417	0.820602	1.05823	0.0139602	1	0.905946	0
GCST90199713	0.31808	0.931958	0.798386	1.06553	0.124901	1	0.723779	0
GCST90200945	0.319763	1.15404	0.850594	1.45748	1.48418	1	0.223122	0.326227
GCST90200417	0.31979	1.13586	0.868213	1.4035	2.3304	1	0.126869	0.570889
GCST90200992	0.322091	0.962327	0.887757	1.0369	0.331693	1	0.564664	0
GCST90199906	0.322891	0.935488	0.807579	1.0634	0.00577362	1	0.939432	0
GCST90200281	0.324512	0.955426	0.866753	1.0441	0.319568	1	0.571868	0
GCST90200050	0.327942	0.923278	0.769565	1.07699	0.401055	1	0.526545	0
GCST90200689	0.328802	0.971186	0.913355	1.02902	0.984318	1	0.321135	0
GCST90200005	0.329704	0.937541	0.811947	1.06313	0.462047	1	0.496669	0
GCST90199719	0.329874	1.03091	0.96873	1.0931	0.790901	1	0.373828	0
GCST90200125	0.330092	1.07383	0.925255	1.2224	0.234092	1	0.628506	0
GCST90200354	0.330379	1.0713	0.927733	1.21486	0.00210164	1	0.963435	0
GCST90200455	0.331001	1.08669	0.911904	1.26148	1.49872	1	0.220869	0.332762
GCST90200414	0.33363	0.930589	0.789878	1.0713	0.898091	1	0.343294	0
GCST90200956	0.335618	1.14887	0.845835	1.45191	2.62688	1	0.105068	0.61932
GCST90199908	0.336915	0.93273	0.795429	1.07003	0.590421	1	0.442257	0
GCST90199827	0.336963	0.939086	0.814746	1.06343	0.335322	1	0.562542	0
GCST90199623	0.337176	0.906549	0.715709	1.09739	2.22287	1	0.13598	0.55013
GCST90200512	0.337947	1.04447	0.953513	1.13542	0.115176	1	0.734327	0
GCST90200801	0.338937	1.05316	0.944204	1.16211	0.45146	1	0.501642	0
GCST90200863	0.339036	1.05722	0.939915	1.17453	0.0788904	1	0.778807	0
GCST90199986	0.339038	0.803315	0.400105	1.20652	5.72331	1	0.0167411	0.825276
GCST90200893	0.339191	1.16623	0.825351	1.5071	3.00816	1	0.0828464	0.667571
GCST90200352	0.340036	1.0468	0.950662	1.14294	0.617793	1	0.431868	0
GCST90200839	0.340131	0.967343	0.900245	1.03444	0.401159	1	0.526491	0
GCST90200216	0.340402	0.937913	0.810274	1.06555	0.205904	1	0.649997	0
GCST90200562	0.341544	0.949607	0.845762	1.05345	0.0815424	1	0.775218	0
GCST90199925	0.342811	0.915295	0.740286	1.0903	1.62843	1	0.20192	0.385912
GCST90200794	0.34312	1.04706	0.949763	1.14436	0.947921	1	0.330249	0
GCST90200791	0.343882	0.949412	0.844659	1.05416	0.0497902	1	0.823429	0
GCST90199985	0.344637	0.939911	0.81529	1.06453	0.542158	1	0.46154	0
GCST90200861	0.345228	1.14343	0.845602	1.44125	3.51061	1	0.0609769	0.715149
GCST90200127	0.346317	0.95989	0.876413	1.04337	0.343433	1	0.557854	0
GCST90200526	0.346782	0.79692	0.373867	1.21997	4.4395	1	0.0351165	0.774749
GCST90200339	0.347185	0.918978	0.750053	1.0879	0.394977	1	0.529695	0
GCST90199701	0.347288	1.20873	0.773445	1.64402	5.64709	1	0.0174844	0.822918
GCST90199864	0.347363	0.952124	0.852268	1.05198	0.670834	1	0.412761	0
GCST90200530	0.348734	1.07881	0.913963	1.24367	0.0148618	1	0.902971	0
GCST90200205	0.349583	0.902053	0.696821	1.10728	2.48402	1	0.115008	0.597426
GCST90200228	0.350431	0.938191	0.808454	1.06793	0.90124	1	0.34245	0
GCST90199948	0.351218	0.931062	0.786123	1.076	0.111114	1	0.73888	0
GCST90200638	0.351729	1.04374	0.951679	1.13581	0.64327	1	0.422529	0
GCST90200320	0.352187	1.07146	0.920921	1.22199	0.00227448	1	0.961962	0
GCST90200227	0.352465	1.06217	0.931117	1.19323	0.288483	1	0.591194	0
GCST90200384	0.353227	0.876229	0.61492	1.13754	2.85033	1	0.0913553	0.649163
GCST90199867	0.353354	1.17653	0.80374	1.54931	3.84963	1	0.0497568	0.740235
GCST90199739	0.353478	0.938233	0.807762	1.06871	0.0298799	1	0.862763	0
GCST90199846	0.353495	0.953632	0.855683	1.05158	0.0970147	1	0.755442	0
GCST90200734	0.353621	1.06663	0.925847	1.2074	0.0159651	1	0.899452	0
GCST90199965	0.354613	1.05319	0.940568	1.16581	0.418892	1	0.51749	0
GCST90200490	0.35498	0.946855	0.834243	1.05947	0.00037519	1	0.984546	0
GCST90199868	0.356804	1.05508	0.937921	1.17225	0.389145	1	0.532749	0
GCST90199812	0.357007	0.943649	0.82374	1.06356	0.440137	1	0.507056	0
GCST90200273	0.357464	1.04248	0.952001	1.13296	0.438096	1	0.508043	0
GCST90200947	0.358113	1.05367	0.939199	1.16815	0.109669	1	0.740522	0
GCST90200182	0.358207	0.910814	0.72056	1.10107	2.09285	1	0.14799	0.522182
GCST90200910	0.358644	0.838307	0.493069	1.18355	4.78608	1	0.0286906	0.791061
GCST90200517	0.358721	1.05533	0.937175	1.17348	0.309967	1	0.577701	0
GCST90199825	0.359048	1.05267	0.940117	1.16522	0.0159046	1	0.899642	0
GCST90200181	0.35953	0.938159	0.805875	1.07044	0.28825	1	0.591344	0
GCST90200722	0.359558	0.948402	0.838024	1.05878	0.00252411	1	0.959931	0
GCST90200926	0.361611	1.08265	0.905085	1.26022	1.67901	1	0.195056	0.404411
GCST90199905	0.361727	1.05334	0.938722	1.16795	0.285099	1	0.593378	0
GCST90199996	0.363384	1.14979	0.826798	1.47278	4.19781	1	0.0404763	0.76178
GCST90200043	0.363747	1.12196	0.858779	1.38513	1.79258	1	0.180612	0.442145
GCST90200010	0.363782	1.07419	0.914076	1.23431	0.0257578	1	0.872493	0
GCST90200406	0.363787	1.07109	0.917671	1.2245	1.06038	1	0.303127	0.0569463
GCST90200912	0.364045	1.0545	0.936813	1.17219	0.125528	1	0.723114	0
GCST90200187	0.364642	1.12653	0.852969	1.4001	1.59133	1	0.207136	0.371596
GCST90199756	0.365098	1.04835	0.943716	1.15299	0.000289359	1	0.986428	0
GCST90200637	0.365766	1.05189	0.939444	1.16433	0.31962	1	0.571836	0
GCST90199791	0.366022	0.960761	0.875681	1.04584	0.101528	1	0.750004	0
GCST90200288	0.367473	1.03735	0.956116	1.11859	0.119465	1	0.729616	0
GCST90200087	0.369251	1.02022	0.976085	1.06435	0.0288655	1	0.86509	0
GCST90199898	0.370402	0.803282	0.372836	1.23373	5.79006	1	0.0161171	0.82729
GCST90199946	0.371196	1.20463	0.756121	1.65315	4.5184	1	0.0335322	0.778683
GCST90199872	0.371559	0.951412	0.844838	1.05799	0.465882	1	0.494888	0
GCST90199835	0.374956	0.962694	0.880281	1.04511	0.192612	1	0.660752	0
GCST90200809	0.375843	1.0575	0.930236	1.18477	0.347623	1	0.555462	0
GCST90200581	0.376694	1.12036	0.853501	1.38723	6.19314	1	0.0128246	0.838531
GCST90199741	0.376703	0.923109	0.752628	1.09359	2.6495	1	0.103583	0.62257
GCST90199746	0.37681	0.776033	0.279346	1.27272	6.57715	1	0.0103296	0.847958
GCST90199991	0.377089	0.935971	0.793893	1.07805	0.00463846	1	0.945701	0
GCST90199649	0.37812	1.18715	0.770968	1.60333	7.66694	1	0.00562416	0.86957
GCST90200742	0.37957	0.935824	0.792677	1.07897	0.296817	1	0.585885	0
GCST90199897	0.379905	0.949423	0.836528	1.06232	0.996264	1	0.318216	0
GCST90200429	0.380172	0.958311	0.865204	1.05142	0.512614	1	0.47401	0
GCST90200975	0.380934	0.945929	0.824975	1.06688	0.168404	1	0.681534	0
GCST90200072	0.382407	1.04764	0.940735	1.15455	0.000320525	1	0.985716	0
GCST90200606	0.382721	0.969325	0.900448	1.0382	0.00110261	1	0.973511	0
GCST90200060	0.384948	1.09191	0.884574	1.29924	0.624999	1	0.429196	0
GCST90200622	0.385062	1.06269	0.921236	1.20414	0.0257084	1	0.872615	0
GCST90199889	0.387166	0.877767	0.60073	1.1548	4.33454	1	0.0373466	0.769295
GCST90199723	0.388593	0.928252	0.765148	1.09136	0.240879	1	0.623572	0
GCST90199978	0.389101	1.19832	0.747002	1.64963	4.74394	1	0.0294017	0.789205
GCST90201004	0.390212	0.917215	0.728376	1.10605	0.749474	1	0.386643	0
GCST90200405	0.390242	1.06092	0.921954	1.19988	1.14948	1	0.283657	0.130045
GCST90200762	0.392527	0.769543	0.241281	1.29781	5.94514	1	0.0147579	0.831795
GCST90199673	0.39322	0.876938	0.594437	1.15944	4.15179	1	0.0415905	0.75914
GCST90200697	0.394324	1.0466	0.939375	1.15383	2.06261	1	0.150952	0.515177
GCST90199646	0.394347	1.04967	0.935369	1.16398	0.29657	1	0.586041	0
GCST90200428	0.394763	0.937365	0.793109	1.08162	0.123806	1	0.724943	0
GCST90200403	0.395436	0.88253	0.611598	1.15346	2.92124	1	0.0874205	0.65768
GCST90200110	0.396118	0.932764	0.777467	1.08806	0.595996	1	0.44011	0
GCST90199813	0.396205	0.956393	0.855656	1.05713	0.575418	1	0.448114	0
GCST90199942	0.396643	0.949658	0.833252	1.06606	0.950568	1	0.329575	0
GCST90199766	0.397833	0.817216	0.393502	1.24093	2.99487	1	0.0835286	0.666096
GCST90200161	0.39784	0.96666	0.889373	1.04395	0.000120071	1	0.991257	0
GCST90200953	0.398136	0.911882	0.707484	1.11628	2.29835	1	0.129512	0.564905
GCST90200545	0.399452	0.954122	0.847405	1.06084	0.181501	1	0.670087	0
GCST90199845	0.400397	0.93085	0.769676	1.09202	0.276495	1	0.599008	0
GCST90199712	0.400517	1.06845	0.908863	1.22805	0.129079	1	0.719389	0
GCST90200222	0.400543	0.941528	0.805202	1.07785	1.23601	1	0.266241	0.190946
GCST90200937	0.401928	1.0717	0.90404	1.23936	0.065362	1	0.798213	0
GCST90200166	0.40282	0.974891	0.916065	1.03372	0.0211123	1	0.884473	0
GCST90199838	0.402841	1.03762	0.949486	1.12575	0.407383	1	0.523301	0
GCST90200093	0.402881	1.05003	0.932802	1.16726	0.161603	1	0.687685	0
GCST90199980	0.404454	1.09318	0.874121	1.31224	2.03444	1	0.153771	0.508464
GCST90199659	0.404732	1.18699	0.747123	1.62686	4.19546	1	0.0405324	0.761647
GCST90200682	0.406508	0.932666	0.773673	1.09166	2.06816	1	0.150403	0.516477
GCST90200982	0.406743	0.854439	0.510562	1.19832	3.17064	1	0.074973	0.684606
GCST90200819	0.406882	0.939527	0.796623	1.08243	0.00307661	1	0.955766	0
GCST90200938	0.407617	1.05284	0.927783	1.17789	0.66838	1	0.413617	0
GCST90200549	0.408438	1.04868	0.933261	1.1641	1.08669	1	0.297205	0.0797785
GCST90200790	0.411704	1.16318	0.773573	1.55279	4.682	1	0.0304803	0.786416
GCST90200651	0.41211	0.966557	0.88664	1.04647	0.583961	1	0.444764	0
GCST90201016	0.412526	1.04226	0.94118	1.14334	1.19471	1	0.274382	0.162975
GCST90199706	0.412536	0.972011	0.905065	1.03896	0.223271	1	0.636559	0
GCST90200935	0.412576	0.956802	0.853472	1.06013	0.36645	1	0.544946	0
GCST90200379	0.413509	1.04836	0.932447	1.16428	0.177538	1	0.673498	0
GCST90200768	0.414069	1.0354	0.950457	1.12033	0.397684	1	0.528288	0
GCST90200243	0.41433	0.949529	0.828346	1.07071	0.112833	1	0.736941	0
GCST90200872	0.414332	0.853927	0.503197	1.20466	3.34216	1	0.0675259	0.700792
GCST90200527	0.414406	0.904406	0.674844	1.13397	1.9964	1	0.157673	0.499099
GCST90200395	0.415749	1.04294	0.939523	1.14636	0.170891	1	0.679322	0
GCST90200176	0.416052	0.925975	0.74758	1.10437	0.023616	1	0.877866	0
GCST90200304	0.416564	1.04844	0.93158	1.16529	0.0515843	1	0.820329	0
GCST90199865	0.416907	0.956146	0.850266	1.06203	0.00628172	1	0.936828	0
GCST90199998	0.417114	1.07132	0.899058	1.24357	1.25315	1	0.262952	0.202009
GCST90200572	0.41713	0.95713	0.853578	1.06068	0.0668515	1	0.795977	0
GCST90200361	0.417839	0.955584	0.848132	1.06304	0.685264	1	0.40778	0
GCST90199914	0.418204	1.09601	0.863568	1.32844	1.88921	1	0.169291	0.470678
GCST90200356	0.41858	1.06737	0.904123	1.23063	0.104281	1	0.746752	0
GCST90200967	0.419425	1.04115	0.941262	1.14104	0.327767	1	0.566977	0
GCST90200396	0.419433	0.950993	0.832029	1.06996	0.0457913	1	0.830556	0
GCST90200234	0.41995	1.05987	0.914378	1.20536	0.590832	1	0.442097	0
GCST90200193	0.421171	1.09435	0.86446	1.32424	2.97634	1	0.0844899	0.664017
GCST90200966	0.421296	1.05015	0.92792	1.17238	0.323216	1	0.569681	0
GCST90200382	0.42287	0.837999	0.441821	1.23418	3.2621	1	0.0708983	0.693449
GCST90200025	0.423178	1.0351	0.949207	1.12099	0.0137959	1	0.906499	0
GCST90200873	0.423515	0.953633	0.840085	1.06718	0.162059	1	0.687268	0
GCST90200897	0.424254	1.17418	0.746949	1.60141	3.71587	1	0.0538977	0.730884
GCST90199802	0.424391	1.08689	0.873695	1.30009	2.67828	1	0.101726	0.626625
GCST90200385	0.424907	1.10051	0.853633	1.34738	1.79319	1	0.180537	0.442336
GCST90200757	0.425354	0.961399	0.866492	1.05631	0.102803	1	0.748492	0
GCST90200096	0.427705	0.957491	0.852443	1.06254	0.31774	1	0.572969	0
GCST90200916	0.428076	1.06369	0.906176	1.2212	0.515207	1	0.472893	0
GCST90199799	0.428454	1.02964	0.95628	1.10299	0.245795	1	0.620051	0
GCST90199770	0.428725	1.15362	0.773153	1.53409	6.40572	1	0.0113753	0.843889
GCST90199958	0.429195	0.945511	0.810423	1.0806	0.32197	1	0.570426	0
GCST90200857	0.429573	1.06645	0.90158	1.23131	1.24662	1	0.264199	0.19783
GCST90200479	0.431103	0.957858	0.852948	1.06277	0.879277	1	0.3484	0
GCST90200979	0.43158	1.13895	0.792683	1.48522	8.29913	1	0.00396641	0.879505
GCST90200591	0.43171	0.965945	0.881055	1.05084	0.668246	1	0.413664	0
GCST90200399	0.431772	0.965128	0.878188	1.05207	0.676997	1	0.410623	0
GCST90200347	0.432048	0.95044	0.826809	1.07407	0.347778	1	0.555374	0
GCST90199957	0.432561	1.05943	0.911013	1.20785	0.577761	1	0.447191	0
GCST90199762	0.43272	1.03616	0.945828	1.12649	0.853425	1	0.355585	0
GCST90200298	0.432824	1.0517	0.922509	1.1809	0.000841629	1	0.976856	0
GCST90200968	0.433232	0.96616	0.881525	1.05079	0.00565044	1	0.94008	0
GCST90199738	0.433509	1.0528	0.92067	1.18493	0.00530187	1	0.941954	0
GCST90200789	0.435718	0.920879	0.721925	1.11983	0.000482578	1	0.982474	0
GCST90200632	0.436137	1.12262	0.814008	1.43123	2.26422	1	0.132393	0.558347
GCST90200297	0.436264	1.05188	0.921275	1.18248	0.223204	1	0.636609	0
GCST90200749	0.436319	0.953317	0.835776	1.07086	0.00234988	1	0.961337	0
GCST90200000	0.43662	1.03904	0.940674	1.13741	0.20173	1	0.653328	0
GCST90200758	0.4369	0.970385	0.895723	1.04505	0.671897	1	0.412391	0
GCST90200312	0.437362	0.94855	0.818712	1.07839	0.0600806	1	0.806369	0
GCST90200838	0.438195	1.05442	0.916838	1.192	0.191381	1	0.66177	0
GCST90200148	0.438511	0.951079	0.827313	1.07485	0.709333	1	0.399665	0
GCST90200765	0.440894	0.938974	0.783777	1.09417	0.119083	1	0.730031	0
GCST90200932	0.441508	1.05713	0.911646	1.20261	0.0119931	1	0.912796	0
GCST90200242	0.442726	0.960861	0.860924	1.0608	0.678541	1	0.410089	0
GCST90200314	0.443103	1.04539	0.929398	1.16138	0.493423	1	0.482404	0
GCST90200707	0.443947	0.973226	0.904678	1.04177	0.078837	1	0.77888	0
GCST90200383	0.444511	0.958953	0.853734	1.06417	0.94371	1	0.331326	0
GCST90200202	0.444515	0.893945	0.622084	1.16581	2.53504	1	0.111344	0.605529
GCST90199662	0.444553	1.1081	0.830968	1.38524	1.83457	1	0.175588	0.454914
GCST90200106	0.445026	0.95744	0.848219	1.06666	0.172739	1	0.677689	0
GCST90200535	0.44593	0.860228	0.500817	1.21964	4.11186	1	0.0425835	0.756801
GCST90199855	0.446397	0.971242	0.897217	1.04527	0.228026	1	0.632991	0
GCST90200287	0.446924	1.05211	0.917826	1.18639	1.06164	1	0.302842	0.0580591
GCST90199714	0.448327	0.950251	0.821648	1.07885	0.00760095	1	0.930526	0
GCST90199654	0.44843	0.957975	0.849317	1.06663	0.0238483	1	0.877271	0
GCST90200520	0.44854	1.06632	0.894805	1.23783	1.73671	1	0.187556	0.424199
GCST90199635	0.449125	0.964578	0.872852	1.0563	0.470575	1	0.492723	0
GCST90200598	0.449266	1.05181	0.917608	1.18601	0.52952	1	0.466809	0
GCST90200169	0.451052	0.788305	0.237773	1.33884	9.50644	1	0.00204752	0.894808
GCST90200958	0.451483	0.907746	0.667602	1.14789	2.82842	1	0.0926095	0.646445
GCST90199829	0.452651	0.94145	0.788646	1.09425	1.06141	1	0.302894	0.0578556
GCST90200703	0.453066	1.03637	0.94137	1.13136	0.0795631	1	0.77789	0
GCST90200452	0.453945	1.03049	0.950686	1.1103	0.355179	1	0.551196	0
GCST90200141	0.454892	1.07095	0.884859	1.25705	1.65006	1	0.198951	0.39396
GCST90199628	0.455518	1.04346	0.92931	1.15762	0.0714232	1	0.789276	0
GCST90200029	0.455941	0.963534	0.867668	1.0594	0.437063	1	0.508543	0
GCST90200358	0.456364	1.07817	0.872477	1.28386	2.25616	1	0.133083	0.55677
GCST90200847	0.456509	0.89116	0.604671	1.17765	2.16595	1	0.141097	0.53831
GCST90200782	0.456878	1.05298	0.913409	1.19255	0.0809384	1	0.77603	0
GCST90200608	0.457663	1.03043	0.95013	1.11073	0.000868764	1	0.976486	0
GCST90200099	0.460043	0.957447	0.844553	1.07034	0.9125	1	0.339452	0
GCST90199765	0.461825	1.06629	0.889722	1.24286	0.051446	1	0.820566	0
GCST90200401	0.463068	1.04575	0.923548	1.16796	0.308729	1	0.578461	0
GCST90200209	0.464307	1.09967	0.832722	1.36661	2.75367	1	0.0970312	0.636849
GCST90200364	0.46465	1.09696	0.837063	1.35686	2.59763	1	0.107023	0.615034
GCST90200027	0.464663	1.03956	0.933522	1.14559	0.344789	1	0.557078	0
GCST90201009	0.466029	0.96631	0.875729	1.05689	0.0290825	1	0.864589	0
GCST90199679	0.466833	0.952307	0.823841	1.08077	0.0290323	1	0.864705	0
GCST90199822	0.466981	0.961288	0.85698	1.0656	0.0384535	1	0.844535	0
GCST90199974	0.467058	0.846456	0.432663	1.26025	3.33808	1	0.0676934	0.700427
GCST90200245	0.467245	0.932357	0.749985	1.11473	1.89853	1	0.168243	0.473277
GCST90200183	0.467813	1.03104	0.947242	1.11484	0.159376	1	0.689732	0
GCST90200753	0.46855	0.911035	0.670473	1.1516	1.56839	1	0.210441	0.362405
GCST90200574	0.469552	1.04638	0.920693	1.17206	0.0620222	1	0.803328	0
GCST90200593	0.469613	1.13498	0.769115	1.50085	3.7304	1	0.0534305	0.731932
GCST90200095	0.470138	0.846594	0.4303	1.26289	5.19523	1	0.0226489	0.807516
GCST90199833	0.470769	0.942653	0.786812	1.0985	1.98473	1	0.158894	0.496152
GCST90200841	0.471368	1.02604	0.955173	1.09691	0.323245	1	0.569664	0
GCST90200404	0.473245	0.949107	0.810029	1.08819	0.557962	1	0.455082	0
GCST90200139	0.473671	0.974609	0.905154	1.04406	0.635179	1	0.425462	0
GCST90199955	0.475027	0.885079	0.569758	1.2004	7.49588	1	0.00618405	0.866593
GCST90200074	0.475268	0.911934	0.670166	1.1537	3.47966	1	0.0621276	0.712615
GCST90200774	0.47585	0.951785	0.819244	1.08432	0.600808	1	0.43827	0
GCST90200824	0.477306	0.964702	0.86735	1.06205	0.0675411	1	0.794951	0
GCST90200918	0.477537	1.07331	0.871008	1.27562	1.33902	1	0.247207	0.253185
GCST90200970	0.478909	1.09461	0.832723	1.3565	1.88299	1	0.169995	0.468929
GCST90200155	0.479727	1.08434	0.850442	1.31824	1.60642	1	0.204996	0.377498
GCST90199627	0.480212	1.04239	0.924702	1.16008	0.508467	1	0.475803	0
GCST90200744	0.481451	1.04482	0.920033	1.16961	0.14059	1	0.707695	0
GCST90200692	0.481501	1.08542	0.847569	1.32327	4.13392	1	0.042032	0.758099
GCST90200263	0.48208	1.16463	0.705624	1.62363	8.59113	1	0.00337804	0.883601
GCST90199988	0.482106	1.04409	0.921149	1.16704	0.833417	1	0.361286	0
GCST90200595	0.482126	0.92294	0.708062	1.13782	1.10925	1	0.292244	0.0984932
GCST90200430	0.482314	1.04688	0.916102	1.17766	0.0852211	1	0.770343	0
GCST90200296	0.482626	0.960512	0.850275	1.07075	0.284868	1	0.593528	0
GCST90199860	0.482949	1.02367	0.957549	1.08978	0.0121599	1	0.912194	0
GCST90199888	0.486162	1.03112	0.943544	1.11869	0.24513	1	0.620525	0
GCST90200310	0.486463	1.02136	0.961204	1.08152	0.145156	1	0.703208	0
GCST90199793	0.489407	0.915097	0.674364	1.15583	3.64431	1	0.056261	0.7256
GCST90200941	0.490181	0.955139	0.827713	1.08256	0.268669	1	0.604226	0
GCST90200832	0.490426	0.963569	0.860031	1.06711	0.460971	1	0.497171	0
GCST90200156	0.492595	1.13023	0.758246	1.50222	5.32071	1	0.0210734	0.812055
GCST90200442	0.492661	1.05471	0.898426	1.21098	0.0577557	1	0.810079	0
GCST90200917	0.492856	1.16556	0.69238	1.63874	7.00617	1	0.00812293	0.857269
GCST90200981	0.493106	0.954717	0.825223	1.08421	0.854179	1	0.355373	0
GCST90199849	0.493543	1.08396	0.843626	1.32428	2.33602	1	0.126412	0.571921
GCST90200221	0.493802	0.967339	0.873787	1.06089	0.132863	1	0.715481	0
GCST90200922	0.495097	1.04751	0.911013	1.18401	0.14667	1	0.701738	0
GCST90200289	0.495365	1.05333	0.900027	1.20663	0.407157	1	0.523416	0
GCST90199789	0.498967	1.08596	0.836782	1.33513	0.997435	1	0.317932	0
GCST90200326	0.498977	1.05335	0.898688	1.20802	0.231133	1	0.630685	0
GCST90199687	0.499141	1.03879	0.926304	1.15127	0.0460746	1	0.83004	0
GCST90199655	0.499447	1.07308	0.860998	1.28516	1.14058	1	0.285529	0.123254
GCST90200900	0.499607	0.941678	0.772358	1.111	1.29232	1	0.25562	0.2262
GCST90200102	0.500453	0.897338	0.598701	1.19597	3.43985	1	0.0636414	0.70929
GCST90200583	0.500881	0.969839	0.882015	1.05766	0.99114	1	0.319464	0
GCST90200270	0.500904	1.05639	0.892174	1.22061	0.712713	1	0.398544	0
GCST90200625	0.502089	1.04134	0.92063	1.16204	0.00849641	1	0.926558	0
GCST90200674	0.502501	0.979395	0.919168	1.03962	0.189727	1	0.663144	0
GCST90200883	0.503106	0.964813	0.861821	1.06781	0.154961	1	0.693839	0
GCST90199922	0.50392	1.03861	0.925382	1.15184	0.0587734	1	0.808445	0
GCST90200868	0.504294	0.956182	0.827567	1.0848	0.782379	1	0.376415	0
GCST90200617	0.50561	1.09513	0.815034	1.37523	2.24492	1	0.134053	0.554551
GCST90200090	0.507717	0.952068	0.810244	1.09389	0.723188	1	0.3951	0
GCST90200440	0.508597	1.03142	0.938262	1.12457	0.113356	1	0.736356	0
GCST90200976	0.50974	0.938624	0.756149	1.1211	1.50743	1	0.219531	0.336621
GCST90200418	0.511673	1.07253	0.855897	1.28917	2.26553	1	0.132281	0.558603
GCST90200735	0.512002	0.927292	0.709968	1.14462	1.91098	1	0.166854	0.476709
GCST90200994	0.512101	1.0329	0.934539	1.13126	0.432731	1	0.510652	0
GCST90200754	0.512253	1.06756	0.865496	1.26963	1.46566	1	0.226032	0.317714
GCST90200731	0.512685	0.967328	0.869514	1.06514	0.825067	1	0.363703	0
GCST90200254	0.513149	0.829108	0.316918	1.3413	3.54809	1	0.0596141	0.718158
GCST90200821	0.513318	1.02885	0.942358	1.11533	0.247498	1	0.618843	0
GCST90200424	0.513467	0.971808	0.88725	1.05637	0.337769	1	0.56112	0
GCST90199973	0.513707	1.08035	0.839216	1.32148	4.22004	1	0.0399492	0.763035
GCST90199967	0.514142	0.956746	0.826801	1.08669	0.130424	1	0.717993	0
GCST90200295	0.514463	1.0385	0.922754	1.15424	0.096923	1	0.755554	0
GCST90200503	0.516049	0.990123	0.960315	1.01993	0.309741	1	0.577839	0
GCST90200815	0.516142	1.02436	0.950828	1.09789	0.386131	1	0.53434	0
GCST90200013	0.516882	0.86429	0.453918	1.27466	4.27561	1	0.038663	0.766115
GCST90200991	0.517397	1.03659	0.925804	1.14738	0.11703	1	0.732279	0
GCST90199964	0.517515	0.965825	0.862329	1.06932	0.0947843	1	0.758181	0
GCST90199994	0.517767	1.0496	0.899304	1.19989	0.380257	1	0.537466	0
GCST90200117	0.517777	0.962696	0.849651	1.07574	0.0768983	1	0.781546	0
GCST90200348	0.519358	1.077	0.842786	1.31121	1.72211	1	0.189422	0.419316
GCST90200518	0.520386	0.97205	0.88682	1.05728	0.798053	1	0.371676	0
GCST90200048	0.520642	1.03979	0.918376	1.16121	0.015054	1	0.902349	0
GCST90199956	0.521956	1.03571	0.926404	1.14502	0.000995423	1	0.974831	0
GCST90201019	0.52395	1.03062	0.936445	1.1248	0.168244	1	0.681678	0
GCST90200246	0.524561	1.03796	0.92104	1.15488	1.06664	1	0.301706	0.0624758
GCST90199767	0.525255	0.957128	0.824855	1.0894	1.20262	1	0.272799	0.168481
GCST90200213	0.525523	1.07747	0.838305	1.31663	2.09228	1	0.148045	0.522053
GCST90200951	0.525779	1.04567	0.904596	1.18674	0.29352	1	0.587974	0
GCST90200493	0.526525	0.967361	0.866352	1.06837	0.20407	1	0.651455	0
GCST90200812	0.527145	0.960934	0.839853	1.08201	0.0112478	1	0.915538	0
GCST90199674	0.527898	1.05488	0.884467	1.2253	0.952776	1	0.329014	0
GCST90200028	0.528171	0.957344	0.824806	1.08988	0.000141337	1	0.990515	0
GCST90200400	0.529163	0.915534	0.652458	1.17861	2.23183	1	0.135193	0.551938
GCST90200159	0.52925	1.03992	0.915558	1.16428	1.03417	1	0.309182	0.0330381
GCST90200635	0.529753	0.958454	0.828871	1.08804	0.634825	1	0.425591	0
GCST90199696	0.529861	0.964581	0.854076	1.07509	0.425002	1	0.514451	0
GCST90200260	0.530587	0.949363	0.791101	1.10762	0.622178	1	0.430239	0
GCST90200710	0.531404	0.926358	0.695741	1.15698	5.3395	1	0.0208474	0.812717
GCST90200229	0.534797	0.952045	0.800619	1.10347	0.0079316	1	0.929035	0
GCST90199803	0.535338	1.03183	0.931182	1.13248	0.860462	1	0.353609	0
GCST90200398	0.535788	0.950241	0.792737	1.10775	1.44007	1	0.230128	0.30559
GCST90199969	0.53624	1.0242	0.947508	1.1009	0.164331	1	0.6852	0
GCST90200307	0.536903	1.11195	0.756623	1.46727	5.52959	1	0.0186975	0.819155
GCST90200894	0.53759	0.967456	0.863986	1.07093	0.0243558	1	0.875983	0
GCST90200449	0.537814	1.02775	0.939469	1.11604	0.000136747	1	0.99067	0
GCST90200709	0.537889	0.976995	0.903801	1.05019	1.03037	1	0.310072	0.0294725
GCST90199658	0.538413	1.14384	0.685598	1.60208	4.63766	1	0.0312776	0.784374
GCST90200532	0.538454	0.968643	0.868734	1.06855	0.938634	1	0.332629	0
GCST90200487	0.53915	0.955212	0.812265	1.09816	0.86885	1	0.351274	0
GCST90200100	0.53929	0.920661	0.667353	1.17397	1.91574	1	0.166327	0.478008
GCST90200416	0.539526	1.0362	0.920562	1.15183	0.0126969	1	0.910284	0
GCST90199697	0.540028	1.12582	0.723376	1.52827	4.74074	1	0.0294564	0.789062
GCST90200017	0.540395	1.04017	0.911561	1.16879	0.122375	1	0.726473	0
GCST90200344	0.540712	0.959114	0.828118	1.09011	0.719622	1	0.396268	0
GCST90200103	0.540987	1.15245	0.663687	1.64121	6.94147	1	0.00842201	0.855938
GCST90200411	0.542221	1.09056	0.799336	1.38178	4.67662	1	0.0305758	0.78617
GCST90200779	0.542493	0.936187	0.730832	1.14154	1.5111	1	0.218971	0.338231
GCST90199786	0.543246	1.08999	0.799863	1.38011	3.43706	1	0.0637489	0.709054
GCST90199935	0.543326	1.04093	0.908936	1.17293	0.795938	1	0.372311	0
GCST90200904	0.545364	0.876064	0.474374	1.27775	4.59244	1	0.0321132	0.782251
GCST90200860	0.545378	1.09274	0.792155	1.39332	2.18668	1	0.139209	0.542686
GCST90199882	0.546188	1.07755	0.825683	1.32942	2.13709	1	0.143774	0.532075
GCST90200184	0.547786	0.94711	0.774651	1.11957	2.61292	1	0.105997	0.617286
GCST90200350	0.549992	1.23594	0.46234	2.00954	10.3781	1	0.00127522	0.903643
GCST90199692	0.551249	1.03725	0.914728	1.15977	0.00701242	1	0.933263	0
GCST90200619	0.552197	0.957594	0.81778	1.09741	0.00210449	1	0.96341	0
GCST90200224	0.55236	1.03151	0.927578	1.13544	0.239514	1	0.624557	0
GCST90200262	0.552889	1.02512	0.942157	1.10808	0.136861	1	0.711422	0
GCST90199966	0.553159	1.03293	0.924096	1.14177	0.794458	1	0.372756	0
GCST90201015	0.55338	0.953905	0.801478	1.10633	3.04967	1	0.0807534	0.672096
GCST90200410	0.553598	0.885433	0.506372	1.26449	3.3571	1	0.0669158	0.702124
GCST90200658	0.554778	0.915571	0.635394	1.19575	3.32917	1	0.0680611	0.699625
GCST90200515	0.555004	0.963729	0.843294	1.08416	1.0116	1	0.31452	0.0114673
GCST90199963	0.555391	0.976857	0.899936	1.05378	0.152923	1	0.695758	0
GCST90200160	0.556013	0.92564	0.678102	1.17318	3.52496	1	0.0604514	0.716309
GCST90200343	0.556341	1.09148	0.786695	1.39627	1.84538	1	0.174322	0.458106
GCST90200810	0.557617	1.0323	0.924349	1.14024	0.70402	1	0.401436	0
GCST90199733	0.557895	1.03544	0.916896	1.15399	0.126621	1	0.721962	0
GCST90199790	0.55818	1.03303	0.922481	1.14357	0.1441	1	0.704239	0
GCST90200500	0.558602	0.959211	0.822534	1.09589	1.44911	1	0.22867	0.309923
GCST90199641	0.558914	1.04726	0.888771	1.20575	0.00672046	1	0.934664	0
GCST90200301	0.559595	1.0365	0.913888	1.15911	1.16321	1	0.280801	0.14031
GCST90200059	0.561109	1.08239	0.804547	1.36023	3.7869	1	0.0516553	0.735932
GCST90200700	0.561309	1.01893	0.95507	1.08278	0.00549483	1	0.940909	0
GCST90199885	0.562637	0.967581	0.857828	1.07733	0.012309	1	0.911659	0
GCST90200439	0.562895	0.963439	0.839578	1.0873	0.066513	1	0.796483	0
GCST90199689	0.563836	0.969521	0.866016	1.07303	0.821786	1	0.364658	0
GCST90200568	0.564665	1.03261	0.921638	1.14358	0.202382	1	0.652805	0
GCST90200923	0.566958	1.05243	0.872939	1.23193	1.29435	1	0.255248	0.22741
GCST90200858	0.5671	1.03044	0.926195	1.13469	0.0480982	1	0.826406	0
GCST90199834	0.567302	0.922275	0.655963	1.18859	1.97755	1	0.159649	0.494323
GCST90199979	0.567781	1.03144	0.923574	1.13931	0.586071	1	0.443943	0
GCST90200108	0.568914	0.940845	0.737316	1.14437	1.30733	1	0.252879	0.235083
GCST90200394	0.569422	0.965279	0.845661	1.0849	1.10981	1	0.292124	0.0989436
GCST90200806	0.569961	1.02031	0.950245	1.09037	0.363292	1	0.546684	0
GCST90199794	0.570406	0.932118	0.697658	1.16658	2.39743	1	0.121535	0.582887
GCST90199672	0.570743	1.03021	0.925781	1.13463	0.396783	1	0.528755	0
GCST90200047	0.571125	0.953604	0.793055	1.11415	0.0217521	1	0.882748	0
GCST90200475	0.571248	1.02798	0.931117	1.12485	0.706823	1	0.400501	0
GCST90199787	0.571833	1.03835	0.905387	1.17132	0.179415	1	0.671877	0
GCST90200451	0.573374	0.963389	0.835957	1.09082	0.743057	1	0.388683	0
GCST90200599	0.57375	1.03898	0.903167	1.17479	0.00303314	1	0.95608	0
GCST90199700	0.575729	0.909947	0.594561	1.22533	1.54103	1	0.214465	0.351083
GCST90200662	0.576665	0.954116	0.793024	1.11521	0.0837675	1	0.772255	0
GCST90200149	0.576795	1.04325	0.891361	1.19513	2.03859	1	0.153351	0.509466
GCST90200859	0.579079	1.03618	0.908344	1.16402	0.496335	1	0.481115	0
GCST90200225	0.579329	1.05798	0.852999	1.26296	1.38011	1	0.240082	0.275422
GCST90200488	0.579799	0.970738	0.867154	1.07432	0.367738	1	0.54424	0
GCST90199788	0.5799	1.09931	0.747681	1.45093	8.4529	1	0.00364462	0.881697
GCST90200648	0.580412	0.922835	0.649236	1.19643	2.14755	1	0.142798	0.534352
GCST90200846	0.580982	1.07566	0.806988	1.34434	2.26582	1	0.132256	0.558659
GCST90200657	0.581246	0.968974	0.858723	1.07922	0.726761	1	0.393935	0
GCST90200494	0.581872	1.05142	0.868388	1.23446	0.194047	1	0.65957	0
GCST90200998	0.582767	1.03521	0.909583	1.16084	0.0167276	1	0.897092	0
GCST90200738	0.583126	1.02382	0.938746	1.1089	0.839193	1	0.359628	0
GCST90200817	0.583371	1.03675	0.905434	1.16806	0.842479	1	0.358689	0
GCST90200198	0.583833	0.9679	0.85305	1.08275	0.00322649	1	0.954703	0
GCST90199785	0.583964	0.933998	0.697764	1.17023	2.74742	1	0.0974117	0.636022
GCST90200495	0.584172	0.904677	0.563312	1.24604	1.94157	1	0.163498	0.484953
GCST90200481	0.585433	1.05034	0.869447	1.23124	0.100698	1	0.750993	0
GCST90200575	0.586186	1.0144	0.962561	1.06623	0.91985	1	0.337514	0
GCST90200138	0.587536	0.948107	0.760597	1.13562	1.52288	1	0.217184	0.343349
GCST90200557	0.58908	1.03803	0.900037	1.17603	0.183072	1	0.668747	0
GCST90199933	0.590171	0.941286	0.727622	1.15495	1.76606	1	0.18387	0.433769
GCST90200652	0.590284	1.02395	0.93677	1.11113	0.0123477	1	0.911521	0
GCST90200561	0.591058	0.799572	0.0684559	1.53069	10.9534	1	0.000934334	0.908704
GCST90200540	0.592037	0.902856	0.54756	1.25815	3.71753	1	0.0538441	0.731004
GCST90200786	0.592153	1.02953	0.921488	1.13758	0.148399	1	0.70007	0
GCST90200889	0.592951	1.02239	0.940295	1.10449	0.464688	1	0.495441	0
GCST90200737	0.593864	1.02636	0.929466	1.12326	0.858766	1	0.354084	0
GCST90200829	0.594334	1.05521	0.852032	1.25838	1.37556	1	0.24086	0.273021
GCST90200886	0.594472	1.03691	0.901013	1.17281	0.458394	1	0.498376	0
GCST90199993	0.594476	1.03008	0.919323	1.14085	0.0389236	1	0.8436	0
GCST90200210	0.594791	1.0324	0.913	1.15181	0.071378	1	0.789341	0
GCST90200178	0.594849	1.03208	0.913857	1.1503	0.162032	1	0.687292	0
GCST90200443	0.594897	0.911616	0.585844	1.23739	2.90981	1	0.088042	0.656335
GCST90199837	0.595563	1.03407	0.908268	1.15987	0.162884	1	0.686515	0
GCST90200154	0.596015	0.960187	0.812996	1.10738	0.0587734	1	0.808445	0
GCST90199660	0.596907	1.03203	0.913318	1.15075	0.00718137	1	0.932466	0
GCST90199707	0.597882	0.968141	0.849757	1.08653	0.0410772	1	0.839389	0
GCST90200509	0.597992	1.06375	0.826781	1.30072	2.15368	1	0.142229	0.535679
GCST90200602	0.598555	0.964162	0.830747	1.09758	0.905807	1	0.341229	0
GCST90199764	0.599568	1.04082	0.888433	1.19321	0.707047	1	0.400426	0
GCST90199816	0.599597	1.05578	0.847524	1.26404	1.32535	1	0.249633	0.245485
GCST90199650	0.599632	1.03143	0.914087	1.14877	0.25366	1	0.61451	0
GCST90199895	0.599822	0.963317	0.826282	1.10035	0.293237	1	0.588153	0
GCST90200255	0.600084	0.971341	0.864203	1.07848	0.0886981	1	0.765839	0
GCST90200069	0.600414	1.03476	0.904702	1.16481	0.269779	1	0.60348	0
GCST90200522	0.600751	0.959704	0.808786	1.11062	0.520875	1	0.470469	0
GCST90200793	0.600875	1.0425	0.883271	1.20173	1.57614	1	0.209317	0.365539
GCST90199797	0.602471	1.04372	0.879191	1.20826	0.941356	1	0.331929	0
GCST90200035	0.602684	1.07887	0.78191	1.37583	3.03733	1	0.0813697	0.670763
GCST90200837	0.604318	0.980802	0.908191	1.05341	0.0076216	1	0.930432	0
GCST90199870	0.604873	0.973799	0.874547	1.07305	0.280639	1	0.596283	0
GCST90200668	0.605204	1.04317	0.879493	1.20684	0.865237	1	0.352277	0
GCST90199743	0.605757	1.03279	0.908264	1.15732	0.0452717	1	0.831505	0
GCST90200291	0.606058	1.06519	0.817438	1.31294	1.78856	1	0.181102	0.44089
GCST90200165	0.606327	0.951251	0.765839	1.13666	2.53523	1	0.11133	0.605559
GCST90199926	0.606879	1.09308	0.738519	1.44764	5.4575	1	0.0194845	0.816766
GCST90199807	0.607747	0.979746	0.902409	1.05708	0.532977	1	0.465358	0
GCST90200064	0.609378	1.04583	0.870026	1.22164	0.300111	1	0.583813	0
GCST90200037	0.609537	0.903571	0.533522	1.27362	2.74864	1	0.0973372	0.636184
GCST90199661	0.609731	0.966012	0.835512	1.09651	0.0871288	1	0.76786	0
GCST90200409	0.610118	1.03389	0.903625	1.16415	0.0230166	1	0.879414	0
GCST90199863	0.610822	1.01795	0.948821	1.08708	0.514718	1	0.473104	0
GCST90200747	0.610971	1.04026	0.885133	1.19539	0.117511	1	0.73175	0
GCST90200907	0.611186	0.91716	0.597784	1.23654	2.9368	1	0.0865821	0.659493
GCST90200120	0.611829	1.02644	0.924314	1.12857	0.142233	1	0.706071	0
GCST90200843	0.612065	0.964897	0.829229	1.10056	0.0670234	1	0.795721	0
GCST90199861	0.612813	1.02929	0.915855	1.14272	0.519229	1	0.471171	0
GCST90199758	0.613346	0.956888	0.789668	1.12411	2.16394	1	0.141282	0.53788
GCST90200641	0.615728	1.03186	0.907457	1.15626	0.385929	1	0.534447	0
GCST90200712	0.616393	1.04955	0.855693	1.24341	2.12142	1	0.145252	0.528617
GCST90200760	0.616667	1.02997	0.912612	1.14734	0.36136	1	0.547752	0
GCST90199900	0.617789	0.971189	0.858024	1.08435	0.0176243	1	0.894386	0
GCST90200741	0.618227	1.05961	0.825167	1.29406	1.63968	1	0.20037	0.390124
GCST90200058	0.618274	1.02536	0.925607	1.12512	0.576962	1	0.447506	0
GCST90200664	0.620533	0.967071	0.836715	1.09743	1.3168	1	0.251167	0.240582
GCST90199881	0.62064	1.03449	0.897918	1.17106	0.550976	1	0.457919	0
GCST90199928	0.620977	0.972912	0.865543	1.08028	0.0558408	1	0.813195	0
GCST90200241	0.621217	0.952174	0.762468	1.14188	1.95837	1	0.161687	0.489372
GCST90199629	0.621596	1.072	0.78611	1.35788	2.63774	1	0.104352	0.620888
GCST90200919	0.62248	1.02755	0.917877	1.13722	0.666093	1	0.414417	0
GCST90200124	0.622984	0.908819	0.54531	1.27233	2.46108	1	0.116699	0.593674
GCST90200751	0.623724	1.08309	0.751143	1.41503	2.26519	1	0.13231	0.558537
GCST90199642	0.625212	0.984527	0.922443	1.04661	0.174933	1	0.675764	0
GCST90199665	0.626062	1.07636	0.769214	1.38351	2.57425	1	0.108615	0.611538
GCST90200353	0.62631	1.02732	0.917358	1.13728	0.128002	1	0.720513	0
GCST90200250	0.626317	1.01625	0.950843	1.08166	0.704237	1	0.401364	0
GCST90200542	0.626926	1.03014	0.908604	1.15168	0.971295	1	0.324357	0
GCST90200116	0.628861	0.926479	0.628344	1.22461	3.45652	1	0.0630026	0.710692
GCST90199718	0.629409	1.08473	0.740587	1.42887	3.62673	1	0.0568584	0.72427
GCST90200746	0.63029	1.02403	0.926167	1.1219	0.375444	1	0.540052	0
GCST90200618	0.631809	0.939165	0.690334	1.188	1.63115	1	0.201544	0.386937
GCST90200422	0.631862	0.938006	0.684398	1.19161	1.80424	1	0.179201	0.445749
GCST90201005	0.633906	1.08248	0.74303	1.42193	4.02237	1	0.0449007	0.75139
GCST90200431	0.634136	1.03766	0.882562	1.19276	0.132108	1	0.716256	0
GCST90200745	0.635375	0.969775	0.844843	1.09471	0.0807218	1	0.776322	0
GCST90200476	0.636539	1.07592	0.761012	1.39084	2.87926	1	0.0897273	0.652688
GCST90200219	0.63856	0.981795	0.905833	1.05776	0.499349	1	0.479786	0
GCST90200770	0.639406	1.03416	0.891261	1.17706	0.136387	1	0.711899	0
GCST90200152	0.639419	0.975496	0.872987	1.07801	0.54116	1	0.461953	0
GCST90201008	0.639429	0.969685	0.84286	1.09651	0.329987	1	0.565667	0
GCST90200436	0.639856	1.03977	0.873191	1.20634	1.31061	1	0.252284	0.236997
GCST90199744	0.640849	0.960452	0.7943	1.1266	0.402521	1	0.52579	0
GCST90199640	0.640894	0.980721	0.899712	1.06173	0.00242446	1	0.960729	0
GCST90199728	0.640904	1.0399	0.872238	1.20756	0.0331278	1	0.855574	0
GCST90199841	0.641618	0.987892	0.936903	1.03888	0.556679	1	0.455602	0
GCST90200977	0.642491	1.0423	0.863706	1.22089	1.40101	1	0.236554	0.286232
GCST90200203	0.642645	1.01799	0.94201	1.09396	0.0978503	1	0.754425	0
GCST90200665	0.643191	1.01721	0.944407	1.09	0.556366	1	0.455728	0
GCST90200996	0.643477	0.971551	0.851081	1.09202	0.717233	1	0.397053	0
GCST90199871	0.643878	1.05311	0.827948	1.27827	1.87099	1	0.171361	0.465525
GCST90199727	0.643898	1.03531	0.885594	1.18503	0.104318	1	0.746708	0
GCST90199949	0.644073	1.02375	0.923001	1.1245	0.0670711	1	0.79565	0
GCST90199638	0.644418	0.928739	0.626117	1.23136	4.1305	1	0.0421168	0.757899
GCST90200375	0.644478	0.967154	0.827643	1.10667	0.197701	1	0.656583	0
GCST90200467	0.645003	0.975544	0.871506	1.07958	0.295228	1	0.58689	0
GCST90199633	0.645016	1.02008	0.934663	1.10549	0.0322829	1	0.857408	0
GCST90200041	0.645227	1.07977	0.740172	1.41938	4.43567	1	0.0351955	0.774555
GCST90199750	0.646245	0.959599	0.78708	1.13212	1.37829	1	0.240393	0.274462
GCST90199844	0.646441	1.02207	0.927782	1.11635	0.147231	1	0.701196	0
GCST90199716	0.647232	0.943275	0.700323	1.18623	2.81599	1	0.0933292	0.644885
GCST90199669	0.648283	1.03959	0.869473	1.20971	0.242426	1	0.622459	0
GCST90199759	0.648415	0.968154	0.831263	1.10504	1.34593	1	0.24599	0.257021
GCST90200705	0.648983	0.986488	0.928307	1.04467	0.0259014	1	0.872141	0
GCST90200507	0.64938	0.950387	0.736494	1.16428	1.52499	1	0.216866	0.344257
GCST90200111	0.649743	1.07091	0.764868	1.37695	3.21258	1	0.0730742	0.688724
GCST90200755	0.649786	0.975471	0.869589	1.08135	0.00660064	1	0.935248	0
GCST90200257	0.650184	0.98694	0.930495	1.04338	0.0334923	1	0.854791	0
GCST90199670	0.651137	0.913697	0.53962	1.28777	3.23561	1	0.0720536	0.690939
GCST90200208	0.651319	0.957441	0.772867	1.14201	1.74018	1	0.187117	0.425346
GCST90199776	0.651698	1.02745	0.908253	1.14665	0.868842	1	0.351276	0
GCST90199809	0.65218	0.970696	0.843269	1.09812	0.0143565	1	0.904627	0
GCST90200032	0.653067	1.08832	0.703228	1.47341	2.84664	1	0.0915651	0.648709
GCST90200869	0.65326	1.02777	0.906621	1.14891	0.00157114	1	0.968382	0
GCST90200012	0.653391	0.953393	0.74997	1.15682	1.10825	1	0.292463	0.0976741
GCST90200491	0.653408	0.973865	0.859792	1.08794	0.707507	1	0.400273	0
GCST90200327	0.655348	1.03131	0.89383	1.16879	0.522752	1	0.46967	0
GCST90199694	0.65772	0.970701	0.841093	1.10031	0.499327	1	0.479796	0
GCST90200464	0.659824	0.971923	0.846897	1.09695	1.18074	1	0.277205	0.153073
GCST90199778	0.660056	0.978201	0.881059	1.07534	1.01895	1	0.312769	0.0185943
GCST90200834	0.660143	1.02145	0.925855	1.11704	0.170107	1	0.680017	0
GCST90199953	0.660255	0.977405	0.876654	1.07816	0.480973	1	0.487982	0
GCST90200888	0.660872	1.0314	0.89112	1.17168	0.520486	1	0.470635	0
GCST90199808	0.661098	0.975093	0.86374	1.08645	0.177346	1	0.673664	0
GCST90200134	0.661561	0.954666	0.751696	1.15764	3.38075	1	0.0659622	0.704207
GCST90199977	0.661886	0.976641	0.871951	1.08133	0.102875	1	0.748407	0
GCST90200218	0.662584	1.03419	0.880613	1.18777	1.18034	1	0.277287	0.152786
GCST90199798	0.664758	1.02232	0.921369	1.12327	0.417087	1	0.518394	0
GCST90200539	0.665882	0.978947	0.883386	1.07451	0.443382	1	0.505495	0
GCST90200113	0.667359	1.03518	0.87473	1.19564	1.10257	1	0.293703	0.0930271
GCST90199856	0.667864	0.988079	0.933625	1.04253	0.101065	1	0.750556	0
GCST90199678	0.668392	1.04784	0.828956	1.26672	1.65433	1	0.198371	0.395526
GCST90200470	0.669151	0.952338	0.733724	1.17095	2.90443	1	0.0883363	0.655699
GCST90200756	0.671679	1.03195	0.88421	1.17969	1.11081	1	0.291907	0.0997523
GCST90199883	0.671731	0.946961	0.701656	1.19227	2.00964	1	0.156302	0.502399
GCST90200630	0.671812	1.02086	0.924362	1.11735	0.998891	1	0.317579	0
GCST90200884	0.672352	0.984982	0.915385	1.05458	0.280826	1	0.59616	0
GCST90200986	0.672435	0.977884	0.875365	1.0804	0.320711	1	0.571181	0
GCST90200718	0.672446	0.973558	0.850982	1.09613	0.0107807	1	0.917304	0
GCST90200529	0.673447	1.02934	0.892878	1.16581	0.0320147	1	0.857995	0
GCST90199768	0.673719	1.04031	0.852674	1.22794	0.166641	1	0.683115	0
GCST90200725	0.673825	1.02283	0.91651	1.12916	0.466546	1	0.49458	0
GCST90200016	0.67501	1.01992	0.92682	1.11301	0.0680311	1	0.794225	0
GCST90200930	0.67657	1.06163	0.772072	1.35118	1.67928	1	0.19502	0.404508
GCST90199939	0.676696	1.06024	0.777068	1.34342	2.21721	1	0.136479	0.548983
GCST90200536	0.677741	1.02194	0.918467	1.12541	0.782786	1	0.37629	0
GCST90200603	0.678055	0.983665	0.906538	1.06079	0.251633	1	0.615928	0
GCST90201000	0.678111	0.97857	0.877371	1.07977	0.166704	1	0.683058	0
GCST90199796	0.678301	1.03068	0.885714	1.17564	0.0508345	1	0.821617	0
GCST90200024	0.67852	0.985072	0.914484	1.05566	6.87876e-05	1	0.993383	0
GCST90200061	0.678751	1.02567	0.904193	1.14715	0.206661	1	0.649397	0
GCST90200948	0.67889	1.05419	0.797647	1.31072	2.11152	1	0.146194	0.526409
GCST90200280	0.68039	0.982304	0.898105	1.0665	0.072063	1	0.788356	0
GCST90200290	0.681379	1.02255	0.914916	1.13018	0.0528619	1	0.818156	0
GCST90200740	0.682637	1.04663	0.823093	1.27017	3.48167	1	0.0620523	0.712781
GCST90200903	0.683774	1.05856	0.776764	1.34036	1.42414	1	0.232723	0.297822
GCST90200088	0.683904	1.03266	0.875442	1.18987	1.33641	1	0.247668	0.251727
GCST90200319	0.685015	1.04366	0.832682	1.25465	3.26708	1	0.0706835	0.693916
GCST90199890	0.685169	1.02228	0.914552	1.13002	0.0210938	1	0.884524	0
GCST90200920	0.686397	1.09078	0.650098	1.53146	4.50704	1	0.0337556	0.778125
GCST90200389	0.686407	0.964019	0.789346	1.13869	0.00539425	1	0.941452	0
GCST90200381	0.686695	0.966396	0.803107	1.12969	1.02352	1	0.311686	0.0229778
GCST90200158	0.68717	0.967784	0.810986	1.12458	0.450802	1	0.501954	0
GCST90199893	0.68746	0.984173	0.907067	1.06128	0.0845441	1	0.771231	0
GCST90199710	0.687885	1.0205	0.920501	1.12049	0.746174	1	0.38769	0
GCST90200136	0.688604	1.04229	0.835471	1.2491	3.18999	1	0.0740906	0.686519
GCST90200704	0.688647	1.02154	0.916192	1.12688	1.47935	1	0.223877	0.324027
GCST90199751	0.688897	1.02409	0.906137	1.14205	0.333132	1	0.563821	0
GCST90199745	0.68904	1.0243	0.905296	1.14329	0.0409058	1	0.83972	0
GCST90200415	0.689145	0.979883	0.881317	1.07845	0.173389	1	0.677117	0
GCST90200238	0.689413	0.981763	0.892323	1.0712	1.18587	1	0.276165	0.156735
GCST90200212	0.693288	0.977869	0.867887	1.08785	0.268441	1	0.60438	0
GCST90200547	0.693657	1.01813	0.927932	1.10832	1.04561	1	0.306521	0.0436192
GCST90200362	0.693832	0.987965	0.928043	1.04789	0.013108	1	0.908849	0
GCST90199970	0.694313	0.961511	0.769562	1.15346	2.66847	1	0.102355	0.625253
GCST90200610	0.694513	1.02372	0.905346	1.14209	0.964735	1	0.325997	0
GCST90200324	0.695706	0.980096	0.880354	1.07984	1.12321	1	0.289228	0.109694
GCST90200576	0.695877	0.983018	0.897872	1.06817	0.360612	1	0.548167	0
GCST90199630	0.696523	0.923806	0.540905	1.30671	4.50834	1	0.03373	0.778189
GCST90200769	0.697192	0.977339	0.863197	1.09148	0.251799	1	0.615811	0
GCST90200309	0.69739	1.02204	0.910941	1.13314	0.667345	1	0.413979	0
GCST90200681	0.697599	1.00686	0.97224	1.04149	0.172053	1	0.678294	0
GCST90199916	0.698478	1.0148	0.939936	1.08965	0.179559	1	0.671753	0
GCST90199961	0.698609	1.015	0.939072	1.09093	0.220597	1	0.638586	0
GCST90199676	0.699613	1.02386	0.902641	1.14509	0.621842	1	0.430364	0
GCST90200590	0.700052	1.0215	0.91212	1.13088	0.00235585	1	0.961288	0
GCST90200850	0.701875	1.02465	0.898451	1.15084	0.114231	1	0.735377	0
GCST90199913	0.701959	0.973761	0.839375	1.10815	1.15556	1	0.282387	0.134622
GCST90200621	0.703	1.021	0.913055	1.12894	0.132859	1	0.715486	0
GCST90200629	0.70307	0.982735	0.893964	1.07151	0.206214	1	0.649751	0
GCST90200001	0.704183	1.02514	0.895364	1.15492	0.269336	1	0.603777	0
GCST90200505	0.70481	0.965373	0.786226	1.14452	1.5363	1	0.21517	0.349084
GCST90200091	0.707255	1.02313	0.902412	1.14385	0.139309	1	0.708969	0
GCST90200875	0.707409	1.02617	0.889524	1.16281	0.0176121	1	0.894422	0
GCST90200856	0.707771	0.978791	0.867897	1.08969	0.0435566	1	0.834681	0
GCST90200489	0.70902	1.03287	0.860248	1.20548	1.24466	1	0.264575	0.196566
GCST90200330	0.710699	1.01762	0.924494	1.11076	0.904936	1	0.341462	0
GCST90200146	0.711122	0.961827	0.759808	1.16385	2.21868	1	0.13635	0.549282
GCST90199932	0.712549	1.06122	0.735539	1.3869	4.16307	1	0.0413144	0.759793
GCST90199792	0.71261	0.952668	0.700822	1.20451	2.39497	1	0.121726	0.582457
GCST90199915	0.712783	1.02188	0.905381	1.13838	0.0490988	1	0.824639	0
GCST90199962	0.712864	1.01516	0.93441	1.09591	0.458945	1	0.498118	0
GCST90200971	0.713471	1.02749	0.880738	1.17425	1.07649	1	0.299484	0.0710547
GCST90200660	0.717962	1.02548	0.887225	1.16373	0.0523423	1	0.819037	0
GCST90200644	0.718084	1.02605	0.884635	1.16746	0.0498924	1	0.823251	0
GCST90200299	0.718914	0.953438	0.699873	1.207	2.82706	1	0.0926877	0.646276
GCST90199902	0.719168	1.02062	0.908232	1.133	0.233354	1	0.629048	0
GCST90200643	0.719975	1.02114	0.905564	1.13672	0.415295	1	0.519294	0
GCST90200328	0.720205	0.973503	0.828514	1.11849	1.31528	1	0.25144	0.239708
GCST90199657	0.720345	1.04602	0.794062	1.29798	1.64389	1	0.199793	0.391686
GCST90200949	0.720406	1.0205	0.908253	1.13274	0.223223	1	0.636595	0
GCST90200457	0.720595	1.02348	0.89483	1.15212	0.130944	1	0.717456	0
GCST90200690	0.722907	0.988494	0.924891	1.0521	0.131379	1	0.717007	0
GCST90200719	0.723774	0.969784	0.802216	1.13735	0.00250348	1	0.960095	0
GCST90200587	0.724176	0.979964	0.868679	1.09125	0.128326	1	0.720174	0
GCST90200235	0.724248	0.976489	0.845868	1.10711	1.9868	1	0.158676	0.496677
GCST90200748	0.7273	0.975616	0.838564	1.11267	0.0106479	1	0.917813	0
GCST90200236	0.727366	0.983402	0.89009	1.07671	1.08191	1	0.298272	0.0757055
GCST90199761	0.727377	1.02257	0.895692	1.14944	0.43358	1	0.510237	0
GCST90200677	0.727666	0.983468	0.890423	1.07651	0.00342421	1	0.953337	0
GCST90200435	0.728198	1.01957	0.909222	1.12991	0.141947	1	0.706353	0
GCST90200122	0.729156	1.04428	0.793637	1.29492	2.6681	1	0.102378	0.625202
GCST90200525	0.729316	1.02497	0.883543	1.1664	0.717815	1	0.396862	0
GCST90199853	0.730148	0.961979	0.745933	1.17802	3.56494	1	0.0590119	0.71949
GCST90200368	0.730535	1.04207	0.802655	1.28149	1.67041	1	0.196204	0.401344
GCST90199693	0.730801	1.02236	0.894987	1.14973	0.219906	1	0.639111	0
GCST90199781	0.731011	1.01222	0.942529	1.08192	0.191706	1	0.661501	0
GCST90200420	0.731075	0.971721	0.810456	1.13299	0.440898	1	0.506689	0
GCST90200446	0.732098	1.02221	0.895069	1.14934	0.0317071	1	0.858672	0
GCST90200215	0.7321	0.985758	0.904221	1.0673	0.0437178	1	0.83438	0
GCST90200551	0.732253	0.977029	0.845436	1.10862	0.37767	1	0.538853	0
GCST90199684	0.732294	1.03924	0.814431	1.26404	0.346839	1	0.555908	0
GCST90200946	0.733055	0.974301	0.826619	1.12198	0.388611	1	0.53303	0
GCST90199878	0.733057	1.02297	0.89099	1.15494	0.00384752	1	0.95054	0
GCST90200519	0.73472	0.980281	0.866227	1.09434	0.0500678	1	0.822945	0
GCST90200683	0.73497	1.02212	0.894069	1.15016	2.14366	1	0.14316	0.533508
GCST90200285	0.73507	0.979002	0.857383	1.10062	0.00412017	1	0.94882	0
GCST90200373	0.735588	1.01072	0.948494	1.07295	0.00408968	1	0.94901	0
GCST90199873	0.735595	0.951918	0.672849	1.23099	4.07825	1	0.0434386	0.754797
GCST90200750	0.736339	1.02152	0.896238	1.14681	0.517372	1	0.471965	0
GCST90200818	0.739136	0.976346	0.837121	1.11557	0.209902	1	0.646844	0
GCST90201002	0.741898	1.07402	0.633507	1.51454	4.74807	1	0.0293311	0.789388
GCST90200585	0.742298	1.01655	0.917905	1.11519	0.646578	1	0.421339	0
GCST90200940	0.742772	1.01799	0.910551	1.12543	0.0348954	1	0.851815	0
GCST90200433	0.743494	0.975285	0.82725	1.12332	0.130833	1	0.717569	0
GCST90200899	0.744013	1.02361	0.881919	1.16529	0.572356	1	0.449324	0
GCST90200880	0.745739	0.970317	0.790906	1.14973	1.28037	1	0.25783	0.218976
GCST90200466	0.745918	0.975654	0.828389	1.12292	0.174094	1	0.676498	0
GCST90200217	0.747965	0.958338	0.704216	1.21246	2.89327	1	0.0889503	0.65437
GCST90199783	0.748147	0.985963	0.900277	1.07165	0.0445891	1	0.832761	0
GCST90200804	0.748702	0.976683	0.834028	1.11934	0.0324657	1	0.857009	0
GCST90200473	0.748746	0.971328	0.795878	1.14678	0.986754	1	0.320537	0
GCST90200082	0.748953	1.02269	0.883737	1.16164	1.4049	1	0.235905	0.288206
GCST90199930	0.7491	1.02111	0.891736	1.15049	0.604435	1	0.436891	0
GCST90200040	0.749339	1.02187	0.887713	1.15603	0.24455	1	0.620939	0
GCST90199817	0.751123	1.01544	0.920017	1.11087	0.351059	1	0.553514	0
GCST90201006	0.751444	1.02668	0.861579	1.19178	0.286258	1	0.592628	0
GCST90200277	0.752609	1.01626	0.91514	1.11738	1.25649	1	0.262317	0.204131
GCST90200444	0.752675	1.01643	0.914223	1.11864	1.0017	1	0.3169	0.00169383
GCST90200942	0.752678	1.03957	0.793455	1.28568	1.91905	1	0.165962	0.478908
GCST90200688	0.753054	1.01896	0.900865	1.13705	0.755447	1	0.384757	0
GCST90200171	0.753409	1.04443	0.767227	1.32163	2.12519	1	0.144895	0.529454
GCST90200070	0.753459	0.965891	0.753038	1.17874	2.01426	1	0.155827	0.50354
GCST90199734	0.753503	1.01436	0.924736	1.10398	0.667936	1	0.413772	0
GCST90200004	0.754177	1.01845	0.902985	1.13391	0.323738	1	0.56937	0
GCST90200349	0.755439	1.02205	0.88329	1.16081	1.23623	1	0.266198	0.191091
GCST90200484	0.755599	1.01761	0.906705	1.12852	0.70968	1	0.39955	0
GCST90200676	0.756036	0.989011	0.919691	1.05833	0.855507	1	0.354999	0
GCST90200030	0.756524	0.94559	0.601642	1.28954	2.47492	1	0.115675	0.595947
GCST90199749	0.756897	0.985134	0.891012	1.07926	0.552931	1	0.457122	0
GCST90200772	0.7569	1.01541	0.917825	1.113	0.323824	1	0.569318	0
GCST90200836	0.757615	0.972608	0.798649	1.14657	1.20891	1	0.271547	0.172811
GCST90200733	0.758301	0.979225	0.846899	1.11155	1.26187	1	0.261297	0.207528
GCST90200798	0.759236	1.04179	0.77453	1.30905	2.84721	1	0.0915326	0.648779
GCST90200874	0.76003	1.01962	0.893745	1.14549	0.776064	1	0.378348	0
GCST90199950	0.761164	1.01782	0.902929	1.1327	0.992147	1	0.319218	0
GCST90200950	0.762532	0.981401	0.860759	1.10204	0.0146966	1	0.903509	0
GCST90200333	0.763194	0.982227	0.866612	1.09784	0.837679	1	0.360061	0
GCST90200911	0.764033	0.983104	0.872786	1.09342	0.00997296	1	0.920452	0
GCST90201018	0.764159	0.984369	0.882258	1.08648	0.503738	1	0.477862	0
GCST90200521	0.764555	1.04249	0.76446	1.32051	1.93419	1	0.164301	0.482987
GCST90199937	0.764661	1.01265	0.929854	1.09544	0.141357	1	0.706936	0
GCST90199731	0.765757	0.979976	0.848247	1.11171	0.193747	1	0.659816	0
GCST90199982	0.766157	1.01922	0.892545	1.1459	0.480112	1	0.488372	0
GCST90199836	0.766581	0.974315	0.804729	1.1439	0.0123846	1	0.91139	0
GCST90200627	0.76672	1.02017	0.886933	1.1534	0.0131558	1	0.908684	0
GCST90200696	0.767624	1.02246	0.873493	1.17142	2.8602	1	0.0907962	0.650374
GCST90199952	0.767663	0.981639	0.859831	1.10345	0.87273	1	0.350201	0
GCST90200877	0.767695	0.977333	0.826932	1.12773	0.0732754	1	0.786626	0
GCST90199880	0.768382	1.01178	0.933375	1.09019	0.117637	1	0.731612	0
GCST90200679	0.76938	1.02882	0.836159	1.22148	3.25836	1	0.0710601	0.693097
GCST90200582	0.769915	0.979728	0.843882	1.11557	0.244379	1	0.621061	0
GCST90200624	0.771549	1.0379	0.782066	1.29373	2.78178	1	0.0953422	0.640518
GCST90200501	0.773731	1.01594	0.907243	1.12465	0.119166	1	0.729941	0
GCST90199832	0.775215	1.02722	0.84041	1.21402	1.37606	1	0.240774	0.273287
GCST90200767	0.775363	0.953807	0.636541	1.27107	2.53126	1	0.111611	0.60494
GCST90200828	0.775406	0.985013	0.882056	1.08797	0.000247233	1	0.987455	0
GCST90200871	0.775513	0.989712	0.919005	1.06042	0.102191	1	0.749216	0
GCST90200371	0.776569	1.01818	0.89265	1.1437	0.45354	1	0.500659	0
GCST90199637	0.777455	1.01975	0.882784	1.15672	0.277563	1	0.598303	0
GCST90200736	0.777567	1.01478	0.91222	1.11734	0.00609627	1	0.937766	0
GCST90199625	0.778715	0.983181	0.865865	1.1005	0.165431	1	0.684205	0
GCST90200447	0.778918	0.970475	0.76434	1.17661	1.5417	1	0.214364	0.351367
GCST90199848	0.779398	0.980525	0.84425	1.1168	1.77925	1	0.182242	0.437965
GCST90200168	0.780764	1.04564	0.72426	1.36701	2.03684	1	0.153529	0.509043
GCST90200716	0.7809	0.983683	0.868702	1.09866	0.12326	1	0.725525	0
GCST90200191	0.781105	1.01547	0.906356	1.12458	0.80289	1	0.370231	0
GCST90200316	0.781421	0.985489	0.882988	1.08799	0.0311696	1	0.859862	0
GCST90199940	0.784335	1.01791	0.889618	1.14621	0.158498	1	0.690543	0
GCST90200908	0.784793	0.965243	0.715781	1.2147	2.66924	1	0.102305	0.625362
GCST90199944	0.784869	0.985227	0.879158	1.0913	0.0139858	1	0.90586	0
GCST90200983	0.785318	0.941685	0.522094	1.36128	6.26464	1	0.0123171	0.840374
GCST90199708	0.785424	0.986451	0.88891	1.08399	0.00120518	1	0.972306	0
GCST90200163	0.785428	0.940867	0.515167	1.36657	3.59904	1	0.0578129	0.722148
GCST90200805	0.786087	0.979659	0.832757	1.12656	1.43314	1	0.231253	0.30223
GCST90200628	0.786161	0.987941	0.900822	1.07506	0.48631	1	0.485578	0
GCST90200432	0.787646	1.0164	0.897089	1.13571	0.326762	1	0.567572	0
GCST90200456	0.788229	0.987423	0.895653	1.07919	0.0115861	1	0.914282	0
GCST90200342	0.789493	1.01488	0.905665	1.12409	0.033625	1	0.854507	0
GCST90199755	0.789888	1.01225	0.922172	1.10232	0.0990564	1	0.752965	0
GCST90200253	0.791479	1.01206	0.922626	1.1015	0.093482	1	0.759796	0
GCST90199621	0.791718	1.01142	0.926678	1.09616	0.561741	1	0.45356	0
GCST90200929	0.792833	1.01436	0.907164	1.12157	0.0225589	1	0.88061	0
GCST90200673	0.793163	0.991402	0.927131	1.05567	0.120616	1	0.728368	0
GCST90199695	0.794008	1.0286	0.813898	1.24331	1.37109	1	0.241625	0.270651
GCST90199747	0.794226	1.03692	0.759473	1.31437	3.34213	1	0.0675272	0.70079
GCST90200482	0.794978	1.01507	0.901396	1.12875	0.770796	1	0.379971	0
GCST90200844	0.796193	1.03392	0.776538	1.2913	1.86876	1	0.171618	0.464885
GCST90200952	0.796239	1.02238	0.852479	1.19229	1.5913	1	0.207141	0.371582
GCST90199653	0.797174	1.01954	0.870539	1.16854	0.292789	1	0.588439	0
GCST90199626	0.797663	0.967954	0.722962	1.21295	1.99722	1	0.157588	0.499303
GCST90200534	0.797908	1.04631	0.691864	1.40075	2.87377	1	0.090034	0.652024
GCST90199736	0.798734	0.985956	0.878008	1.0939	0.291973	1	0.588959	0
GCST90200365	0.798776	0.98652	0.882885	1.09016	0.261783	1	0.608898	0
GCST90199997	0.799211	1.0211	0.858491	1.18372	1.08616	1	0.297324	0.079322
GCST90200729	0.799405	1.0166	0.888564	1.14464	0.78339	1	0.376106	0
GCST90200646	0.799682	0.962755	0.675086	1.25042	4.86008	1	0.027485	0.794242
GCST90199854	0.799984	0.987173	0.887949	1.0864	0.0208229	1	0.885262	0
GCST90200680	0.800004	0.977443	0.802931	1.15195	3.00131	1	0.0831974	0.666812
GCST90200616	0.800425	0.989216	0.905602	1.07283	0.214791	1	0.643038	0
GCST90200425	0.800816	0.986544	0.882006	1.09108	0.433793	1	0.510134	0
GCST90200252	0.801994	1.02991	0.796131	1.26369	2.0887	1	0.148393	0.521233
GCST90199801	0.80215	1.01711	0.883298	1.15091	4.89682e-05	1	0.994417	0
GCST90200150	0.803808	0.989188	0.903888	1.07449	1.28153	1	0.257614	0.219684
GCST90200204	0.804941	0.956845	0.614352	1.29934	2.45144	1	0.117417	0.592077
GCST90200988	0.805511	0.958022	0.623873	1.29217	4.61655	1	0.0316649	0.783388
GCST90200397	0.806059	1.01902	0.867152	1.1709	0.219222	1	0.639633	0
GCST90200359	0.806329	0.972191	0.749877	1.19451	2.00946	1	0.156321	0.502355
GCST90199722	0.808122	0.982679	0.84289	1.12247	1.4581	1	0.227233	0.314175
GCST90199779	0.80873	0.985302	0.866296	1.10431	0.155556	1	0.693281	0
GCST90200056	0.809076	1.02436	0.826727	1.222	1.49736	1	0.221077	0.332159
GCST90200073	0.809386	0.974883	0.770803	1.17896	1.90692	1	0.167306	0.475593
GCST90200055	0.810454	1.01501	0.892364	1.13765	0.397746	1	0.528255	0
GCST90200427	0.812198	0.987956	0.888601	1.08731	0.110191	1	0.739926	0
GCST90200323	0.812425	1.01139	0.917315	1.10546	0.364857	1	0.545821	0
GCST90199918	0.814079	1.0136	0.900265	1.12693	0.471714	1	0.4922	0
GCST90200338	0.814649	1.01613	0.881281	1.15098	0.896178	1	0.343809	0
GCST90200672	0.814901	0.991747	0.922657	1.06084	0.888699	1	0.34583	0
GCST90200266	0.816317	1.01056	0.921452	1.09967	0.397042	1	0.528621	0
GCST90200031	0.817072	0.985786	0.865349	1.10622	1.19216	1	0.274894	0.161187
GCST90199876	0.817117	1.02077	0.844716	1.19683	1.21242	1	0.270854	0.175201
GCST90201020	0.817164	1.00891	0.933358	1.08447	0.671516	1	0.412524	0
GCST90200207	0.817749	0.974688	0.759401	1.18998	2.65948	1	0.102935	0.623986
GCST90199875	0.818535	0.97893	0.798936	1.15892	1.11834	1	0.290276	0.105817
GCST90200331	0.819743	1.01142	0.913196	1.10964	0.120494	1	0.728499	0
GCST90200702	0.821644	1.01912	0.852892	1.18535	1.87544	1	0.170853	0.466792
GCST90199740	0.8219	1.01616	0.875422	1.15691	0.360007	1	0.548502	0
GCST90199681	0.822142	1.01083	0.916441	1.10521	0.00688002	1	0.933895	0
GCST90200909	0.822591	0.981382	0.818636	1.14413	1.38893	1	0.238586	0.28002
GCST90199840	0.822739	0.99116	0.913815	1.0685	0.00314334	1	0.95529	0
GCST90200083	0.823063	0.978013	0.785292	1.17073	2.68652	1	0.101201	0.627771
GCST90200020	0.82488	1.01845	0.855027	1.18187	0.829369	1	0.362455	0
GCST90200461	0.826156	0.986396	0.864993	1.1078	0.00051036	1	0.981976	0
GCST90199851	0.826699	1.008	0.936409	1.07958	0.0774412	1	0.780795	0
GCST90200329	0.82725	1.01543	0.876839	1.15402	0.606928	1	0.435947	0
GCST90199730	0.830139	0.983272	0.83044	1.1361	1.1395	1	0.285759	0.122419
GCST90199705	0.832327	1.00929	0.92327	1.09531	0.719832	1	0.396199	0
GCST90200759	0.833052	0.988928	0.885981	1.09188	0.521337	1	0.470272	0
GCST90200788	0.83345	1.01177	0.902072	1.12147	0.553744	1	0.456792	0
GCST90200363	0.834255	0.993724	0.934943	1.05251	0.31759	1	0.57306	0
GCST90200879	0.834788	1.01472	0.876397	1.15304	0.107314	1	0.743223	0
GCST90200528	0.835365	1.0136	0.885342	1.14186	0.287971	1	0.591524	0
GCST90199959	0.835969	1.01395	0.881931	1.14596	1.04689	1	0.306225	0.0447879
GCST90200355	0.837539	0.988039	0.873707	1.10237	1.02055	1	0.31239	0.0201316
GCST90200223	0.838178	0.989536	0.889117	1.08996	0.169649	1	0.680424	0
GCST90200906	0.840244	1.00981	0.914385	1.10525	0.165213	1	0.684402	0
GCST90200145	0.840272	1.017	0.851676	1.18233	1.69175	1	0.19337	0.408896
GCST90199685	0.840833	0.985615	0.845223	1.12601	0.01425	1	0.90498	0
GCST90199990	0.840973	1.01317	0.88455	1.14178	0.761889	1	0.382738	0
GCST90199911	0.84136	1.00779	0.931499	1.08408	0.245629	1	0.62017	0
GCST90199934	0.841908	1.0169	0.850856	1.18294	0.531977	1	0.465777	0
GCST90200308	0.8425	0.985963	0.847505	1.12442	0.00140055	1	0.970147	0
GCST90200119	0.843503	0.989175	0.881708	1.09664	0.145318	1	0.70305	0
GCST90200895	0.843507	1.01335	0.880802	1.1459	0.359242	1	0.548927	0
GCST90200386	0.843992	0.988371	0.87255	1.10419	0.00447665	1	0.946655	0
GCST90200573	0.84424	1.01082	0.9029	1.11874	0.680549	1	0.409398	0
GCST90200613	0.84467	0.992829	0.921096	1.06456	0.0959419	1	0.756755	0
GCST90199651	0.845545	1.02032	0.815848	1.2248	1.50762	1	0.219503	0.336702
GCST90199975	0.846042	0.981768	0.797731	1.1658	0.25415	1	0.614168	0
GCST90199941	0.848008	1.00868	0.9199	1.09746	0.0814328	1	0.775365	0
GCST90200724	0.848077	1.01352	0.87518	1.15186	0.470857	1	0.492593	0
GCST90200558	0.848962	0.984302	0.822746	1.14586	1.45357	1	0.227956	0.312038
GCST90200318	0.849596	1.01132	0.894336	1.1283	0.000415748	1	0.983732	0
GCST90200492	0.850182	0.986943	0.851452	1.12243	0.0920399	1	0.7616	0
GCST90200046	0.851448	0.990566	0.891825	1.08931	0.375381	1	0.540086	0
GCST90200743	0.851586	0.989672	0.881479	1.09787	0.000539173	1	0.981475	0
GCST90200167	0.851915	0.987343	0.854458	1.12023	0.730542	1	0.392707	0
GCST90200006	0.852615	1.02609	0.750872	1.3013	2.69856	1	0.100439	0.629431
GCST90199721	0.852766	1.01278	0.877787	1.14778	1.05141	1	0.305182	0.0489001
GCST90199634	0.853672	1.01932	0.814041	1.22459	2.71389	1	0.0994783	0.631525
GCST90200261	0.85404	1.02491	0.759567	1.29024	2.37321	1	0.123433	0.57863
GCST90200094	0.85579	1.00649	0.93652	1.07646	0.180219	1	0.671185	0
GCST90199648	0.856122	1.00772	0.924317	1.09111	0.257847	1	0.611603	0
GCST90200578	0.856445	0.980382	0.767832	1.19293	2.87357	1	0.0900452	0.652
GCST90200771	0.856775	0.987251	0.848805	1.1257	0.0416078	1	0.838369	0
GCST90199901	0.857421	0.98952	0.875195	1.10385	0.0179772	1	0.89334	0
GCST90200453	0.858739	0.989123	0.869342	1.1089	0.0385545	1	0.844334	0
GCST90200666	0.858914	0.987749	0.852664	1.12283	0.255575	1	0.613177	0
GCST90200078	0.860508	0.972651	0.667611	1.27769	4.18724	1	0.0407294	0.761179
GCST90200865	0.860951	1.01164	0.881447	1.14182	0.00211473	1	0.963321	0
GCST90200656	0.860995	1.0112	0.88585	1.13655	0.0347711	1	0.852076	0
GCST90200506	0.86166	1.01653	0.830637	1.20242	1.28939	1	0.256161	0.224438
GCST90199688	0.862033	0.9772	0.720067	1.23433	4.15872	1	0.0414206	0.759542
GCST90200761	0.862303	1.00918	0.905458	1.1129	0.036665	1	0.848149	0
GCST90200419	0.862925	0.990653	0.884548	1.09676	0.163496	1	0.685958	0
GCST90199820	0.863113	1.01137	0.882131	1.14061	0.0261262	1	0.871592	0
GCST90200901	0.863315	1.01637	0.830016	1.20272	0.153109	1	0.695582	0
GCST90200237	0.86372	1.03189	0.667768	1.39601	3.50926	1	0.0610266	0.71504
GCST90200186	0.864187	1.02118	0.778478	1.26388	1.9672	1	0.160746	0.491663
GCST90200153	0.86477	1.0119	0.874985	1.14881	1.55996	1	0.211672	0.358956
GCST90200460	0.866495	1.00927	0.901185	1.11736	0.08454	1	0.771237	0
GCST90200854	0.867686	1.01045	0.887523	1.13337	0.0596628	1	0.80703	0
GCST90200498	0.867799	1.01236	0.866806	1.15792	1.0866	1	0.297225	0.0796995
GCST90200173	0.867944	1.01318	0.85781	1.16855	0.311035	1	0.577046	0
GCST90200496	0.869545	0.989037	0.858204	1.11987	0.000886891	1	0.976242	0
GCST90200715	0.869561	1.00911	0.900389	1.11783	0.00538341	1	0.94151	0
GCST90200107	0.870561	1.00722	0.920401	1.09403	0.00623218	1	0.937077	0
GCST90200366	0.870771	1.01018	0.887525	1.13284	0.375287	1	0.540136	0
GCST90200077	0.871112	1.01174	0.869914	1.15357	1.05794	1	0.303685	0.0547686
GCST90200325	0.87116	1.01761	0.80481	1.23041	1.36523	1	0.242633	0.267525
GCST90200483	0.872502	0.983969	0.788176	1.17976	1.51052	1	0.219059	0.337978
GCST90199995	0.872692	0.970124	0.604696	1.33555	4.51847	1	0.0335307	0.778686
GCST90200620	0.873079	1.01261	0.857868	1.16736	0.470569	1	0.492725	0
GCST90200018	0.873593	1.01741	0.802876	1.23195	2.25626	1	0.133075	0.556789
GCST90200284	0.873776	1.04955	0.438288	1.6608	8.90276	1	0.0028474	0.887675
GCST90200346	0.87566	1.007	0.919263	1.09475	0.0920624	1	0.761571	0
GCST90200706	0.875716	1.00726	0.916228	1.0983	0.377876	1	0.538742	0
GCST90200645	0.875788	1.00632	0.927031	1.08562	4.46199	1	0.0346572	0.775885
GCST90200840	0.877191	1.00662	0.922666	1.09057	0.0593998	1	0.807447	0
GCST90200080	0.87851	1.00791	0.906453	1.10937	0.000115408	1	0.991429	0
GCST90199919	0.878793	0.992621	0.89778	1.08746	0.819388	1	0.365359	0
GCST90199683	0.879762	1.00858	0.89736	1.11981	0.0012472	1	0.971828	0
GCST90199772	0.880502	1.00903	0.891335	1.12672	0.0726472	1	0.787521	0
GCST90200882	0.881899	0.99185	0.88433	1.09937	0.181764	1	0.669862	0
GCST90200200	0.882933	1.01373	0.830977	1.19648	0.228573	1	0.632584	0
GCST90199677	0.883281	1.02069	0.744467	1.29691	2.49296	1	0.114356	0.598871
GCST90200335	0.88421	1.01714	0.786504	1.24777	2.30795	1	0.128714	0.566715
GCST90200752	0.885099	0.989208	0.842831	1.13558	0.812198	1	0.367471	0
GCST90199842	0.885675	1.00688	0.91313	1.10062	0.146043	1	0.702345	0
GCST90199823	0.886898	0.991816	0.879038	1.10459	0.88529	1	0.346757	0
GCST90200993	0.887822	1.01496	0.80715	1.22276	1.28072	1	0.257765	0.219191
GCST90200305	0.888131	0.984508	0.768654	1.20036	1.71699	1	0.190081	0.417585
GCST90200279	0.891384	1.01095	0.853781	1.16812	1.57894	1	0.208914	0.366663
GCST90200131	0.891703	0.992279	0.881133	1.10343	0.0396274	1	0.842211	0
GCST90200580	0.891996	0.991649	0.871107	1.11219	0.1686	1	0.681359	0
GCST90200021	0.892792	0.992771	0.887646	1.0979	0.456234	1	0.49939	0
GCST90200548	0.893176	0.987759	0.809098	1.16642	1.8624	1	0.172348	0.46306
GCST90200813	0.893693	1.02118	0.710472	1.3319	2.23805	1	0.13465	0.553183
GCST90199923	0.894097	0.985153	0.766558	1.20375	2.69132	1	0.100896	0.628435
GCST90199891	0.894204	0.993041	0.890484	1.0956	0.161688	1	0.687607	0
GCST90200778	0.895506	1.00852	0.881407	1.13563	0.589031	1	0.442794	0
GCST90200192	0.895635	1.00673	0.906233	1.10722	0.567821	1	0.451126	0
GCST90199981	0.895967	0.982585	0.721541	1.24363	2.53895	1	0.111069	0.606136
GCST90200140	0.896481	1.01233	0.826601	1.19806	1.37415	1	0.2411	0.272278
GCST90200727	0.896759	1.00887	0.874866	1.14288	0.831831	1	0.361744	0
GCST90200807	0.897035	1.00738	0.895672	1.11908	0.000395657	1	0.98413	0
GCST90200969	0.897177	1.00826	0.883045	1.13347	0.214711	1	0.6431	0
GCST90200845	0.897254	1.00842	0.88062	1.13622	0.0203044	1	0.88669	0
GCST90199720	0.898047	1.01107	0.841665	1.18048	2.24585	1	0.133973	0.554735
GCST90200708	0.898589	0.993806	0.898556	1.08906	1.63173	1	0.201464	0.387153
GCST90200068	0.899583	0.990538	0.843581	1.1375	1.47919	1	0.223902	0.323952
GCST90200315	0.900889	1.01315	0.806163	1.22014	1.65978	1	0.197634	0.397509
GCST90200022	0.901147	0.994653	0.910279	1.07903	0.25381	1	0.614405	0
GCST90200695	0.90139	1.00371	0.944975	1.06245	0.888464	1	0.345894	0
GCST90200803	0.902336	1.01268	0.810142	1.21522	1.47759	1	0.224153	0.323221
GCST90200902	0.904602	1.00626	0.90391	1.10861	0.956644	1	0.328034	0
GCST90200960	0.904656	0.993476	0.886719	1.10023	0.189234	1	0.663555	0
GCST90199910	0.905046	1.00735	0.886649	1.12804	0.657318	1	0.417508	0
GCST90199847	0.905182	0.987441	0.780794	1.19409	1.5233	1	0.217121	0.34353
GCST90200201	0.905385	1.00561	0.913135	1.09808	0.541307	1	0.461892	0
GCST90200959	0.905464	1.00732	0.886543	1.12809	0.0243777	1	0.875928	0
GCST90200584	0.906309	1.00714	0.888288	1.12599	0.389612	1	0.532504	0
GCST90200905	0.907096	1.02117	0.665588	1.37676	1.9315	1	0.164595	0.482267
GCST90199904	0.907598	0.992697	0.869383	1.11601	0.529053	1	0.467005	0
GCST90200954	0.910953	1.00787	0.869953	1.14579	0.375054	1	0.540262	0
GCST90200026	0.912294	1.00782	0.868632	1.14701	2.09427	1	0.147852	0.522507
GCST90200713	0.914439	0.992345	0.852696	1.13199	1.0814	1	0.298385	0.0752719
GCST90199971	0.91523	0.991303	0.831169	1.15144	2.31985	1	0.127732	0.568938
GCST90200142	0.915748	0.993614	0.875302	1.11193	0.00978571	1	0.9212	0
GCST90199929	0.916772	1.0059	0.895178	1.11663	0.573955	1	0.448692	0
GCST90200720	0.917014	1.00593	0.894365	1.1175	0.267411	1	0.605074	0
GCST90200650	0.917391	1.00624	0.888301	1.12418	0.271614	1	0.602251	0
GCST90200773	0.918145	1.00705	0.872587	1.14151	0.827636	1	0.362957	0
GCST90200057	0.918226	1.00994	0.82017	1.19971	1.37044	1	0.241736	0.270308
GCST90200934	0.919486	1.01655	0.695655	1.33744	2.76916	1	0.0960968	0.638879
GCST90200985	0.919773	1.01134	0.790719	1.23196	1.62383	1	0.202559	0.384172
GCST90200014	0.919904	1.00696	0.871354	1.14256	1.23945	1	0.265576	0.193193
GCST90200560	0.920269	0.991554	0.826178	1.15693	0.0128807	1	0.90964	0
GCST90199912	0.920512	1.00555	0.896533	1.11457	1.2293e-06	1	0.999115	0
GCST90200151	0.920717	1.00601	0.88767	1.12435	0.749792	1	0.386542	0
GCST90200887	0.921533	1.00764	0.855601	1.15968	0.847951	1	0.357133	0
GCST90200890	0.921919	1.01294	0.754219	1.27166	1.84695	1	0.174138	0.458567
GCST90200980	0.921963	1.00795	0.848904	1.16699	0.124934	1	0.723744	0
GCST90200239	0.921987	0.989459	0.778498	1.20042	1.66737	1	0.196611	0.400254
GCST90201010	0.922	1.00879	0.832876	1.1847	0.273247	1	0.601162	0
GCST90200313	0.92289	1.00581	0.888256	1.12335	0.103701	1	0.747433	0
GCST90200369	0.923615	0.985086	0.680229	1.28994	2.9928	1	0.0836356	0.665864
GCST90200570	0.923777	1.00422	0.917772	1.09067	0.0533184	1	0.817386	0
GCST90200925	0.923814	0.987205	0.724977	1.24943	2.1629	1	0.141378	0.537657
GCST90199983	0.924894	0.994701	0.884524	1.10488	0.482914	1	0.487106	0
GCST90200197	0.925176	0.992896	0.844631	1.14116	0.0683416	1	0.793767	0
GCST90199943	0.925202	1.00625	0.875704	1.1368	0.796759	1	0.372064	0
GCST90200785	0.9254	1.00451	0.910145	1.09887	0.0168258	1	0.896793	0
GCST90200230	0.925915	0.988746	0.751532	1.22596	1.92907	1	0.16486	0.481616
GCST90200701	0.926281	0.992726	0.838634	1.14682	2.1245	1	0.14496	0.529302
GCST90200407	0.927903	1.01383	0.71435	1.3133	2.82349	1	0.0928942	0.645828
GCST90200170	0.92886	1.00606	0.873107	1.139	1.72748	1	0.188733	0.421123
GCST90200302	0.929377	1.00701	0.852033	1.16198	0.143395	1	0.704929	0
GCST90200601	0.930598	1.00383	0.91755	1.09012	0.0873675	1	0.767551	0
GCST90200961	0.931065	0.996095	0.907611	1.08458	0.418146	1	0.517864	0
GCST90200943	0.931999	0.993625	0.8472	1.14005	0.802719	1	0.370282	0
GCST90200276	0.933631	0.993969	0.852026	1.13591	0.0834558	1	0.772668	0
GCST90200607	0.935512	1.01528	0.645062	1.38551	3.39969	1	0.0652088	0.705855
GCST90200053	0.93566	0.984283	0.602697	1.36587	3.86635	1	0.0492635	0.741358
GCST90200098	0.936912	0.994918	0.869087	1.12075	0.95647	1	0.328078	0
GCST90200669	0.936953	0.991315	0.776119	1.20651	1.46113	1	0.22675	0.3156
GCST90200739	0.937593	1.00616	0.851849	1.16048	0.626328	1	0.428705	0
GCST90200831	0.938423	0.993261	0.822296	1.16423	1.14739	1	0.284096	0.128457
GCST90200766	0.938451	1.00683	0.833524	1.18013	0.185195	1	0.666946	0
GCST90200019	0.938993	1.00357	0.912142	1.095	0.138088	1	0.71019	0
GCST90200597	0.940859	1.00523	0.867137	1.14332	1.12553	1	0.288731	0.11153
GCST90200233	0.942137	0.9938	0.826394	1.16121	1.39574	1	0.237438	0.283534
GCST90199884	0.943263	1.00381	0.898968	1.10865	0.00352421	1	0.952661	0
GCST90199652	0.943598	1.00507	0.864742	1.14539	0.801682	1	0.370591	0
GCST90200135	0.943806	1.00349	0.906495	1.10048	0.414837	1	0.519524	0
GCST90200051	0.944761	1.00614	0.83248	1.1798	1.87229	1	0.171213	0.465895
GCST90200508	0.945332	1.00432	0.880877	1.12776	0.913088	1	0.339297	0
GCST90200796	0.945567	0.991472	0.746652	1.23629	2.42771	1	0.119207	0.58809
GCST90199624	0.946191	0.994842	0.845041	1.14464	0.281431	1	0.595765	0
GCST90200914	0.946646	0.99556	0.865515	1.1256	0.333889	1	0.563378	0
GCST90200448	0.946715	0.995998	0.878626	1.11337	0.177979	1	0.673115	0
GCST90199857	0.948402	0.996845	0.90129	1.0924	0.285465	1	0.593141	0
GCST90200231	0.948794	0.996573	0.89199	1.10116	0.695444	1	0.404319	0
GCST90200687	0.949614	1.00302	0.909248	1.0968	1.19176	1	0.274975	0.160904
GCST90200199	0.949933	1.00276	0.916674	1.08884	0.270103	1	0.603263	0
GCST90200130	0.951729	1.01179	0.630127	1.39345	3.32058	1	0.0684177	0.698848
GCST90200008	0.951932	1.00349	0.890025	1.11695	0.0436126	1	0.834576	0
GCST90199668	0.952077	0.997485	0.915448	1.07952	0.00136979	1	0.970476	0
GCST90200391	0.953023	0.996093	0.866098	1.12609	0.190002	1	0.662915	0
GCST90200781	0.953468	0.992178	0.729435	1.25492	2.11667	1	0.145703	0.527559
GCST90200732	0.954339	1.00296	0.901476	1.10445	0.0890114	1	0.765438	0
GCST90200157	0.954558	0.991827	0.710727	1.27293	3.72558	1	0.0535851	0.731585
GCST90200921	0.955519	0.996131	0.860175	1.13209	0.317629	1	0.573036	0
GCST90200776	0.956482	1.00682	0.761911	1.25173	1.93295	1	0.164436	0.482656
GCST90200421	0.956864	1.00427	0.849583	1.15896	0.230258	1	0.631332	0
GCST90200195	0.959875	0.997652	0.90619	1.08911	0.00162956	1	0.9678	0
GCST90200820	0.960622	1.0028	0.891615	1.11399	0.597552	1	0.439514	0
GCST90200510	0.96277	1.00431	0.823417	1.1852	0.0186557	1	0.891358	0
GCST90199954	0.964652	1.0016	0.930687	1.07252	0.0270583	1	0.869342	0
GCST90200274	0.964837	0.99813	0.914999	1.08126	0.162806	1	0.686586	0
GCST90200357	0.965085	0.996598	0.844256	1.14894	1.41233	1	0.23467	0.291949
GCST90199887	0.965095	0.998029	0.909733	1.08632	0.00927253	1	0.923287	0
GCST90200121	0.966021	1.00525	0.763768	1.24673	1.8332	1	0.17575	0.454506
GCST90200639	0.966242	0.997563	0.884712	1.11041	0.229454	1	0.631929	0
GCST90199909	0.966845	0.997391	0.874369	1.12041	0.397131	1	0.528575	0
GCST90199826	0.967817	1.0021	0.89989	1.10432	0.994609	1	0.318618	0
GCST90199715	0.968505	0.996543	0.824951	1.16814	1.14256	1	0.285113	0.12477
GCST90199806	0.970239	0.998628	0.926566	1.07069	0.00643856	1	0.936046	0
GCST90200137	0.970444	0.997603	0.870793	1.12441	1.30666	1	0.253	0.234692
GCST90199774	0.970961	1.00541	0.714045	1.29678	3.2422	1	0.0717642	0.691567
GCST90200180	0.971098	0.995151	0.732849	1.25745	2.13128	1	0.14432	0.530798
GCST90200390	0.97133	0.997493	0.860786	1.1342	0.424648	1	0.514627	0
GCST90200380	0.971639	0.998219	0.900063	1.09638	0.520655	1	0.470562	0
GCST90199691	0.972347	1.00387	0.785089	1.22265	2.31456	1	0.128168	0.567952
GCST90200458	0.973938	1.00411	0.757601	1.25062	2.90221	1	0.0884582	0.655435
GCST90200459	0.974291	1.00212	0.873049	1.1312	0.176206	1	0.674654	0
GCST90199927	0.974533	0.997836	0.864974	1.1307	0.23021	1	0.631368	0
GCST90200468	0.975184	0.997425	0.835156	1.15969	0.15648	1	0.692418	0
GCST90200294	0.975273	1.00068	0.957473	1.04389	0.812404	1	0.367411	0
GCST90200286	0.97563	1.00141	0.910939	1.09188	0.314666	1	0.574831	0
GCST90200504	0.975798	0.998793	0.920842	1.07674	0.210344	1	0.646498	0
GCST90199819	0.976063	1.00135	0.91295	1.08976	0.130463	1	0.717953	0
GCST90200486	0.977644	0.998046	0.861352	1.13474	0.236525	1	0.626728	0
GCST90200189	0.979552	0.99911	0.931027	1.06719	0.0320667	1	0.857881	0
GCST90200723	0.979663	0.99857	0.888592	1.10855	0.2841	1	0.594026	0
GCST90199992	0.980509	1.00131	0.896511	1.1061	1.17337	1	0.27871	0.147753
GCST90200164	0.980826	0.998712	0.893657	1.10377	1.30043	1	0.254135	0.231021
GCST90199647	0.980986	1.00152	0.876577	1.12646	0.016564	1	0.897594	0
GCST90200023	0.981173	1.00263	0.784485	1.22077	1.35177	1	0.244968	0.260231
GCST90200614	0.981583	0.99876	0.893451	1.10407	0.608809	1	0.435237	0
GCST90199903	0.981926	1.0015	0.871896	1.1311	0.0853296	1	0.770201	0
GCST90199874	0.982625	0.99689	0.717027	1.27675	2.42791	1	0.119191	0.588124
GCST90200516	0.985362	0.998622	0.851432	1.14581	0.0585494	1	0.808804	0
GCST90200185	0.985813	1.00063	0.931345	1.06991	0.692141	1	0.405437	0
GCST90199828	0.986662	0.998966	0.877796	1.12014	0.0791388	1	0.778468	0
GCST90200303	0.98704	0.998742	0.846984	1.1505	0.854556	1	0.355267	0
GCST90199894	0.99062	1.00177	0.70626	1.29728	2.03283	1	0.153933	0.508076
GCST90199821	0.99086	1.0006	0.898042	1.10316	0.0758238	1	0.783039	0
GCST90199699	0.991022	1.00135	0.766015	1.23669	2.21131	1	0.137002	0.54778
GCST90200067	0.991765	1.0013	0.754552	1.24805	2.77088	1	0.0959935	0.639104
GCST90200334	0.992646	0.999368	0.864943	1.13379	0.147275	1	0.701153	0
GCST90200086	0.994648	0.999445	0.837347	1.16154	0.498211	1	0.480287	0
GCST90200300	0.994816	0.99945	0.833525	1.16538	1.34946	1	0.245372	0.258965
GCST90200109	0.994882	0.999718	0.91367	1.08577	0.654097	1	0.418652	0
GCST90200454	0.995135	0.999648	0.886568	1.11273	1.21348	1	0.270643	0.175926
GCST90199742	0.996046	0.999654	0.863007	1.1363	1.13886	1	0.285893	0.121931
GCST90200795	0.996116	0.99977	0.907326	1.09221	0.361929	1	0.547437	0
GCST90200808	0.99618	1.0004	0.837964	1.16283	1.11797	1	0.290356	0.105522
GCST90200123	0.996574	1.00024	0.892423	1.10805	0.00119346	1	0.972441	0
GCST90200317	0.997166	1.00022	0.879375	1.12106	1.04181	1	0.307401	0.0401312
GCST90199951	0.99773	1.00013	0.909712	1.09055	0.0483286	1	0.825998	0
GCST90200144	0.998401	1.00008	0.917451	1.08272	0.563179	1	0.452982	0
GCST90200388	0.999594	0.999969	0.878591	1.12135	0.000281934	1	0.986603	0
GCST90200477	0.999603	0.999975	0.903269	1.09668	0.805198	1	0.369544	0

## Sheet: S9.4.
The main meta-results for gut microbiota phenotypes.
id	Random_p-value	Random_OR	Random_95lci	Random_95uci	Q	df.Q	p-value.Q	I2
GCST90027699	2.83963e-20	0.753293	0.700876	0.80571	0.766824	1	0.381201	0
GCST90027772	7.66508e-16	0.791448	0.74073	0.842165	0.0487817	1	0.825197	0
GCST90027461	4.61244e-13	0.682991	0.597129	0.768854	0.0054791	1	0.940994	0
GCST90027669	4.73035e-13	1.15869	1.11569	1.20169	0.903897	1	0.341739	0
GCST90027702	3.83986e-09	1.1545	1.1031	1.20591	1.25104	1	0.263354	0.200664
GCST90027612	9.0316e-08	1.19165	1.12137	1.26192	0.04985	1	0.823325	0
GCST90027841	4.37208e-06	1.0913	1.05234	1.13026	0.164757	1	0.684814	0
GCST90027845	7.45322e-06	0.824954	0.748378	0.90153	2.14963	1	0.142604	0.534805
GCST90027498	1.73572e-05	0.699267	0.562077	0.836456	0.286491	1	0.592478	0
GCST90027538	3.28596e-05	1.10217	1.05395	1.15039	1.78137	1	0.181981	0.438634
GCST90027719	9.25483e-05	1.11448	1.05708	1.17187	0.94624	1	0.330678	0
GCST90027802	0.000105265	1.11323	1.05601	1.17046	0.787415	1	0.374883	0
GCST90027783	0.000134797	1.19708	1.0959	1.29826	2.16491	1	0.141193	0.538088
GCST90027474	0.00052786	0.83091	0.735298	0.926522	0.25013	1	0.616984	0
GCST90027462	0.000730812	0.935319	0.897788	0.972851	0.0097681	1	0.92127	0
GCST90027469	0.000732395	1.11767	1.04938	1.18597	0.782501	1	0.376377	0
GCST90027578	0.00103901	1.16165	1.06505	1.25825	0.0212126	1	0.884201	0
GCST90027659	0.00137095	1.23936	1.09279	1.38593	0.422827	1	0.51553	0
GCST90027770	0.00150252	1.09326	1.03568	1.15085	0.691488	1	0.405659	0
GCST90027592	0.00152522	1.09646	1.03682	1.15611	0.0312314	1	0.859725	0
GCST90027595	0.00156394	0.919277	0.86925	0.969305	0.408962	1	0.522497	0
GCST90027679	0.00210759	0.899742	0.835831	0.963653	0.384419	1	0.535248	0
GCST90027732	0.00260485	1.18126	1.06327	1.29925	0.182431	1	0.669292	0
GCST90027816	0.00290324	1.10988	1.03756	1.18219	0.0699466	1	0.791414	0
GCST90027548	0.00432137	1.24376	1.07634	1.41118	1.70524	1	0.191604	0.413573
GCST90027529	0.00573342	1.1911	1.05552	1.32668	0.000794325	1	0.977516	0
GCST90027685	0.00575665	1.16524	1.04796	1.28253	0.792432	1	0.373366	0
GCST90027746	0.00575675	1.16523	1.04795	1.28252	0.792552	1	0.373329	0
GCST90027673	0.00575938	1.23768	1.06897	1.40639	1.98325	1	0.159049	0.495777
GCST90027707	0.00582129	1.2473	1.07154	1.42306	2.07658	1	0.149575	0.518439
GCST90027827	0.00860361	0.946462	0.906524	0.9864	2.23019	1	0.135337	0.551608
GCST90027618	0.0123964	0.717105	0.495377	0.938832	3.24728	1	0.0715422	0.69205
GCST90027682	0.0159465	1.08755	1.01635	1.15875	0.0332539	1	0.855303	0
GCST90027481	0.0164904	0.807032	0.649305	0.964759	3.55635	1	0.0593182	0.718813
GCST90027616	0.0171664	1.11644	1.02068	1.2122	0.557935	1	0.455093	0
GCST90027824	0.0174406	0.721609	0.492088	0.95113	6.55194	1	0.010477	0.847373
GCST90027605	0.0175618	1.26934	1.04704	1.49164	3.13848	1	0.076465	0.681375
GCST90027706	0.0175815	1.16163	1.02821	1.29506	2.60308	1	0.106656	0.615839
GCST90027539	0.0201713	0.857861	0.737943	0.977779	1.5053	1	0.219857	0.335682
GCST90027823	0.0209762	1.12015	1.01814	1.22217	2.46337	1	0.116528	0.594052
GCST90027452	0.0242653	1.055	1.00715	1.10285	0.119787	1	0.729265	0
GCST90027586	0.0287341	0.628069	0.294766	0.961372	4.42205	1	0.0354773	0.773861
GCST90027789	0.0297732	1.13711	1.01345	1.26076	2.55298	1	0.110087	0.6083
GCST90027556	0.0323028	1.12814	1.01082	1.24547	0.135503	1	0.712793	0
GCST90027589	0.0330963	1.06173	1.00495	1.11851	0.537798	1	0.463347	0
GCST90027536	0.0334924	0.769936	0.557852	0.982019	7.11328	1	0.00765149	0.859418
GCST90027496	0.0345476	1.0752	1.00547	1.14494	0.215832	1	0.642235	0
GCST90027661	0.0384563	1.04496	1.00239	1.08754	0.600034	1	0.438565	0
GCST90027800	0.0390899	1.10536	1.00527	1.20545	0.377242	1	0.539083	0
GCST90027580	0.0459121	0.928373	0.858047	0.9987	0.072912	1	0.787143	0
GCST90027571	0.0486742	1.39127	1.00228	1.78027	13.4741	1	0.00024188	0.925784
GCST90027792	0.0518639	0.916748	0.832823	1.00067	0.795976	1	0.372299	0
GCST90027807	0.0531581	0.931547	0.862161	1.00093	0.049812	1	0.823391	0
GCST90027577	0.0550259	0.804162	0.60411	1.00421	8.00792	1	0.00465732	0.875124
GCST90027521	0.0600673	0.863271	0.720749	1.00579	6.66798	1	0.00981603	0.85003
GCST90027501	0.0608298	0.894955	0.785134	1.00478	1.1913	1	0.275067	0.160581
GCST90027615	0.0722425	1.19192	0.982664	1.40117	4.60281	1	0.0319196	0.782741
GCST90027745	0.0735634	1.33802	0.967764	1.70828	2.99941	1	0.0832947	0.666601
GCST90027684	0.0735738	1.33798	0.967754	1.70821	2.99886	1	0.0833232	0.66654
GCST90027622	0.0777953	0.928733	0.849532	1.00793	1.11465	1	0.291074	0.102853
GCST90027537	0.0780237	0.851365	0.686056	1.01667	0.078266	1	0.779661	0
GCST90027687	0.0784711	1.03753	0.995728	1.07932	0.892871	1	0.344701	0
GCST90027479	0.0784826	1.09954	0.988663	1.21042	3.26164	1	0.0709184	0.693405
GCST90027555	0.0961841	0.883119	0.74542	1.02082	0.39897	1	0.527622	0
GCST90027690	0.0962703	0.552417	0.024975	1.07986	19.7067	1	9.02846e-06	0.949256
GCST90027575	0.10597	1.21338	0.954675	1.47208	3.56918	1	0.0588613	0.719824
GCST90027851	0.109228	1.05473	0.987758	1.12169	0.00579942	1	0.939297	0
GCST90027533	0.112131	0.857393	0.681459	1.03333	3.40649	1	0.0649404	0.706443
GCST90027640	0.112346	1.03814	0.991059	1.08522	0.0433115	1	0.83514	0
GCST90027773	0.11336	0.8771	0.72496	1.02924	2.53655	1	0.111238	0.605764
GCST90027832	0.113823	1.0651	0.984407	1.1458	0.81729	1	0.365974	0
GCST90027711	0.114169	1.20297	0.951146	1.45479	6.59127	1	0.010248	0.848284
GCST90027468	0.115408	1.06978	0.982908	1.15665	0.0172406	1	0.895535	0
GCST90027570	0.115948	1.10247	0.974711	1.23023	0.351205	1	0.553432	0
GCST90027604	0.117262	0.802867	0.556198	1.04954	6.3082	1	0.0120181	0.841476
GCST90027459	0.117993	0.872695	0.713084	1.03231	1.55699	1	0.212106	0.357737
GCST90027653	0.120588	0.965005	0.92082	1.00919	0.00661929	1	0.935156	0
GCST90027564	0.127366	1.09458	0.97299	1.21617	0.77235	1	0.379491	0
GCST90027853	0.128385	0.895735	0.761336	1.03013	8.10705	1	0.00440934	0.876651
GCST90027477	0.13653	0.899729	0.767728	1.03173	5.54233	1	0.0185619	0.81957
GCST90027833	0.143186	1.26569	0.909997	1.62139	24.846	1	6.2099e-07	0.959752
GCST90027467	0.147342	0.667919	0.218731	1.11711	22.4723	1	2.13197e-06	0.955501
GCST90027723	0.148149	0.954959	0.893912	1.01601	0.26913	1	0.603916	0
GCST90027466	0.149129	1.12025	0.956877	1.28362	0.767503	1	0.380991	0
GCST90027710	0.150793	1.12788	0.95343	1.30232	1.22142	1	0.269082	0.181281
GCST90027795	0.150993	0.919488	0.809602	1.02937	0.668771	1	0.413481	0
GCST90027857	0.152965	0.902292	0.768292	1.03629	2.47469	1	0.115692	0.595909
GCST90027483	0.153597	0.896166	0.753546	1.03879	0.516725	1	0.472242	0
GCST90027728	0.154935	0.915195	0.798332	1.03206	0.117742	1	0.731497	0
GCST90027543	0.155268	0.930477	0.834596	1.02636	0.0304486	1	0.861476	0
GCST90027621	0.157182	0.92235	0.814765	1.02993	0.636579	1	0.424952	0
GCST90027535	0.157806	1.1611	0.937558	1.38464	2.51522	1	0.112752	0.60242
GCST90027551	0.159083	1.27416	0.89257	1.65574	31.629	1	1.86624e-08	0.968383
GCST90027528	0.160862	1.14119	0.943835	1.33855	0.243042	1	0.622018	0
GCST90027630	0.164539	0.833875	0.599625	1.06812	3.3624	1	0.0667009	0.702593
GCST90027777	0.165216	1.13597	0.943934	1.32801	1.97074	1	0.16037	0.492576
GCST90027518	0.168755	0.886023	0.7237	1.04835	0.409851	1	0.522045	0
GCST90027602	0.169141	0.890029	0.733269	1.04679	1.83945	1	0.175016	0.456358
GCST90027666	0.170242	0.952173	0.883821	1.02052	0.00922609	1	0.923479	0
GCST90027650	0.174723	1.05919	0.973712	1.14466	0.375574	1	0.539982	0
GCST90027788	0.176186	1.29441	0.867796	1.72103	39.8625	1	2.72485e-10	0.974914
GCST90027697	0.176683	1.06579	0.970346	1.16124	0.00140829	1	0.970065	0
GCST90027843	0.177157	1.23228	0.89494	1.56962	4.47006	1	0.0344937	0.776289
GCST90027613	0.180173	0.937984	0.84729	1.02868	0.371018	1	0.54245	0
GCST90027500	0.192387	0.894204	0.735134	1.05327	5.36507	1	0.020544	0.813609
GCST90027664	0.19324	1.29486	0.850672	1.73904	20.3107	1	6.58299e-06	0.950765
GCST90027705	0.197585	1.33349	0.826198	1.84078	62.0592	1	3.33289e-15	0.983886
GCST90027629	0.197811	0.494381	-0.275137	1.2639	77.4768	1	1.3429e-18	0.987093
GCST90027663	0.197897	0.630493	0.0680191	1.19297	29.6491	1	5.17765e-08	0.966272
GCST90027737	0.197917	0.630543	0.0681224	1.19296	29.6425	1	5.19525e-08	0.966265
GCST90027558	0.198489	0.975052	0.937026	1.01308	0.376623	1	0.539416	0
GCST90027693	0.198972	1.29079	0.847083	1.73449	20.842	1	4.98761e-06	0.95202
GCST90027761	0.199399	1.04719	0.975115	1.11927	1.10141	1	0.293957	0.0920714
GCST90027559	0.199464	0.675714	0.180351	1.17108	5.08063	1	0.0241946	0.803174
GCST90027646	0.20105	0.651863	0.118189	1.18554	41.829	1	9.96145e-11	0.976093
GCST90027482	0.201455	1.18962	0.898684	1.48055	3.88281	1	0.0487829	0.742454
GCST90027511	0.203314	0.946808	0.864857	1.02876	0.341167	1	0.559156	0
GCST90027830	0.204417	1.16036	0.912697	1.40803	6.55096	1	0.0104828	0.847351
GCST90027670	0.20483	1.03782	0.979359	1.09627	1.66972	1	0.196296	0.401097
GCST90027692	0.20713	1.04694	0.974011	1.11987	1.109	1	0.292299	0.0982887
GCST90027844	0.210408	1.15828	0.910584	1.40598	7.27579	1	0.00698902	0.862558
GCST90027460	0.213773	0.813752	0.520137	1.10737	7.47646	1	0.00625108	0.866247
GCST90027647	0.218031	1.1894	0.888034	1.49077	9.67429	1	0.00186865	0.896633
GCST90027755	0.219023	1.08955	0.946756	1.23234	7.3466	1	0.00671898	0.863883
GCST90027530	0.221882	0.883026	0.695341	1.07071	1.6262	1	0.202229	0.38507
GCST90027617	0.222385	1.22	0.866624	1.57338	5.69409	1	0.0170221	0.824379
GCST90027619	0.225586	1.05745	0.96453	1.15037	1.09262	1	0.295891	0.0847708
GCST90027597	0.23179	0.961991	0.89969	1.02429	1.67327	1	0.195821	0.402369
GCST90027776	0.239353	1.30522	0.796791	1.81365	17.3667	1	3.08183e-05	0.942418
GCST90027599	0.244372	0.849854	0.597063	1.10264	51.4114	1	7.49025e-13	0.980549
GCST90027552	0.247289	0.913147	0.766013	1.06028	1.60608	1	0.205044	0.377365
GCST90027837	0.248365	1.28141	0.803598	1.75922	2.86109	1	0.0907459	0.650483
GCST90027797	0.248536	1.06536	0.954341	1.17639	0.933701	1	0.333903	0
GCST90027554	0.254264	1.06119	0.955996	1.16638	0.0354885	1	0.850576	0
GCST90027639	0.254297	0.182154	-1.22397	1.58828	602.875	1	3.96744e-133	0.998341
GCST90027828	0.257506	1.15044	0.890037	1.41084	9.95769	1	0.00160179	0.899575
GCST90027787	0.259622	1.2967	0.780842	1.81255	48.6534	1	3.05431e-12	0.979446
GCST90027765	0.261813	0.957458	0.883151	1.03176	0.00399445	1	0.949606	0
GCST90027488	0.26392	0.596456	-0.111519	1.30443	52.284	1	4.80279e-13	0.980874
GCST90027585	0.26717	1.15978	0.87755	1.44201	3.61481	1	0.0572671	0.723361
GCST90027643	0.269397	1.14128	0.890561	1.39201	0.240072	1	0.624154	0
GCST90027854	0.271735	1.07221	0.94344	1.20098	0.961913	1	0.326705	0
GCST90027608	0.272839	0.938825	0.829482	1.04817	0.00617334	1	0.937374	0
GCST90027855	0.279222	0.967533	0.908726	1.02634	0.249144	1	0.617679	0
GCST90027834	0.281114	0.888268	0.685088	1.09145	15.0956	1	0.000102203	0.933755
GCST90027632	0.289069	1.06323	0.946332	1.18013	0.386797	1	0.533988	0
GCST90027721	0.290348	1.36464	0.688728	2.04055	38.7879	1	4.72456e-10	0.974219
GCST90027805	0.291499	0.878279	0.652112	1.10445	2.7107	1	0.0996775	0.631091
GCST90027582	0.292286	1.1896	0.836735	1.54247	5.39448	1	0.0202005	0.814625
GCST90027565	0.292977	1.1445	0.875189	1.4138	6.28105	1	0.0122036	0.840791
GCST90027627	0.294512	1.06295	0.945249	1.18066	0.264381	1	0.607126	0
GCST90027450	0.296528	0.834947	0.525057	1.14484	3.73622	1	0.0532449	0.732349
GCST90027731	0.297102	1.31254	0.725043	1.90003	21.8988	1	2.87413e-06	0.954335
GCST90027473	0.300733	1.06202	0.944558	1.17948	1.10226	1	0.293772	0.0927693
GCST90027657	0.301489	1.03472	0.968863	1.10057	0.194327	1	0.65934	0
GCST90027733	0.303384	1.07613	0.931154	1.2211	1.20107	1	0.273109	0.167407
GCST90027635	0.304216	0.797477	0.411139	1.18382	20.3154	1	6.56714e-06	0.950776
GCST90027623	0.306583	1.19129	0.824591	1.55798	10.975	1	0.000923479	0.908884
GCST90027779	0.30829	1.1495	0.861897	1.4371	3.81447	1	0.0508115	0.737841
GCST90027447	0.308835	1.0562	0.947967	1.16442	0.286143	1	0.592703	0
GCST90027520	0.313924	0.877183	0.638146	1.11622	21.5122	1	3.51593e-06	0.953515
GCST90027544	0.315777	0.830382	0.498989	1.16178	7.29161	1	0.00692775	0.862856
GCST90027549	0.319495	1.66102	0.359579	2.96247	211.019	1	8.23315e-48	0.995261
GCST90027456	0.319503	0.891866	0.678966	1.10477	0.0301539	1	0.862142	0
GCST90027801	0.324913	1.27926	0.723254	1.83526	10.2545	1	0.00136349	0.902482
GCST90027812	0.325353	1.36998	0.632679	2.10728	23.0815	1	1.55277e-06	0.956675
GCST90027505	0.327708	1.12096	0.878736	1.36318	0.131596	1	0.716783	0
GCST90027542	0.329651	0.951934	0.855294	1.04857	0.506469	1	0.476671	0
GCST90027856	0.331596	0.482048	-0.563539	1.52764	38.766	1	4.77787e-10	0.974204
GCST90027494	0.333949	0.71451	0.135379	1.29364	62.6012	1	2.53097e-15	0.984026
GCST90027778	0.334219	0.0735653	-1.8068	1.95393	194.73	1	2.95094e-44	0.994865
GCST90027649	0.337563	0.896142	0.683881	1.1084	3.36655	1	0.0665331	0.70296
GCST90027534	0.338648	1.16307	0.829038	1.49711	2.27959	1	0.131086	0.561325
GCST90027729	0.348427	1.42031	0.541736	2.29888	29.1921	1	6.55443e-08	0.965744
GCST90027611	0.348524	1.06497	0.929137	1.2008	0.470241	1	0.492877	0
GCST90027568	0.355952	0.948444	0.838977	1.05791	0.898416	1	0.343207	0
GCST90027614	0.356565	0.674553	-0.0173281	1.36643	11.3324	1	0.000761665	0.911757
GCST90027785	0.356695	0.744684	0.201751	1.28762	310.166	1	2.00899e-69	0.996776
GCST90027545	0.358218	0.948532	0.838737	1.05833	0.0975086	1	0.75484	0
GCST90027826	0.360742	0.96449	0.888339	1.04064	3.40744	1	0.0649031	0.706524
GCST90027694	0.363769	0.94329	0.820907	1.06567	0.0536396	1	0.816847	0
GCST90027526	0.367114	0.526913	-0.501185	1.55501	17.7565	1	2.51065e-05	0.943682
GCST90027781	0.370939	0.907274	0.70415	1.1104	5.05592	1	0.0245419	0.802212
GCST90027641	0.371163	0.719162	0.10367	1.33465	5.17032	1	0.022976	0.806588
GCST90027636	0.375429	0.816468	0.410629	1.22231	10.1068	1	0.0014772	0.901057
GCST90027734	0.379195	0.698137	0.0253451	1.37093	72.3946	1	1.76198e-17	0.986187
GCST90027747	0.379242	0.698058	0.0250253	1.37109	72.3442	1	1.8075e-17	0.986177
GCST90027686	0.379243	0.698074	0.0250729	1.37107	72.3436	1	1.8081e-17	0.986177
GCST90027660	0.379244	0.698069	0.0250567	1.37108	72.3411	1	1.81038e-17	0.986177
GCST90027752	0.37925	0.698082	0.0250902	1.37107	72.3391	1	1.81223e-17	0.986176
GCST90027658	0.379299	1.29038	0.643036	1.93773	6.9953	1	0.00817238	0.857047
GCST90027744	0.379303	1.29038	0.643038	1.93772	6.99556	1	0.00817122	0.857052
GCST90027683	0.379308	1.29039	0.643013	1.93777	6.99541	1	0.00817192	0.857049
GCST90027502	0.382044	1.26601	0.669568	1.86246	9.22622	1	0.00238574	0.891613
GCST90027700	0.382629	0.893247	0.653594	1.1329	0.252246	1	0.615498	0
GCST90027475	0.383877	0.794166	0.330869	1.25746	24.6877	1	6.7412e-07	0.959494
GCST90027598	0.385607	0.744733	0.168078	1.32139	6.00722	1	0.0142475	0.833534
GCST90027550	0.38624	1.29147	0.632147	1.9508	126.013	1	3.05523e-29	0.992064
GCST90027486	0.389932	0.834061	0.455768	1.21235	46.2304	1	1.05132e-11	0.978369
GCST90027449	0.390074	1.21222	0.728267	1.69618	61.3464	1	4.78667e-15	0.983699
GCST90027634	0.390502	0.979924	0.934102	1.02575	0.347954	1	0.555273	0
GCST90027464	0.391276	0.573336	-0.402099	1.54877	82.3648	1	1.13153e-19	0.987859
GCST90027465	0.394918	0.665272	-0.105891	1.43644	57.0577	1	4.23206e-14	0.982474
GCST90027759	0.39502	1.04451	0.941943	1.14708	0.114705	1	0.73485	0
GCST90027814	0.395344	1.21081	0.724692	1.69693	12.7385	1	0.000358201	0.921498
GCST90027819	0.3967	0.685251	-0.0426233	1.41313	81.8235	1	1.48802e-19	0.987779
GCST90027596	0.397025	1.13007	0.829063	1.43108	16.1387	1	5.88683e-05	0.938037
GCST90027703	0.397565	1.0677	0.910851	1.22455	4.67617	1	0.0305839	0.78615
GCST90027846	0.39796	0.81882	0.398709	1.23893	17.8669	1	2.36903e-05	0.944031
GCST90027822	0.399949	1.05261	0.930103	1.17512	5.03264	1	0.0248739	0.801297
GCST90027780	0.401012	0.959851	0.866151	1.05355	0.590246	1	0.442324	0
GCST90027799	0.401193	0.968631	0.895393	1.04187	0.969112	1	0.324902	0
GCST90027607	0.404814	1.32365	0.562185	2.08512	12.5055	1	0.000405758	0.920035
GCST90027708	0.408278	0.841133	0.464591	1.21768	6.84793	1	0.00887441	0.85397
GCST90027579	0.409501	0.825216	0.409864	1.24057	28.685	1	8.51588e-08	0.965139
GCST90027519	0.41028	1.12584	0.826304	1.42537	7.06425	1	0.00786371	0.858442
GCST90027698	0.412434	0.837035	0.447334	1.22674	9.6372	1	0.00190676	0.896235
GCST90027485	0.413456	1.39097	0.453987	2.32796	22.1565	1	2.51305e-06	0.954866
GCST90027764	0.414674	1.13778	0.806724	1.46883	32.087	1	1.47424e-08	0.968835
GCST90027510	0.416567	0.833148	0.430602	1.23569	4.18272	1	0.0408382	0.760921
GCST90027820	0.416981	0.719534	0.0422843	1.39678	14.0415	1	0.000178816	0.928783
GCST90027446	0.418451	0.531383	-0.603778	1.66654	29.4025	1	5.88019e-08	0.965989
GCST90027696	0.419583	1.14086	0.798817	1.4829	35.3198	1	2.7977e-09	0.971687
GCST90027644	0.42167	0.954721	0.844277	1.06517	0.644423	1	0.422114	0
GCST90027839	0.422515	1.24454	0.646974	1.8421	33.1258	1	8.63852e-09	0.969812
GCST90027531	0.424487	1.05643	0.917943	1.19492	0.795847	1	0.372338	0
GCST90027743	0.429734	1.02604	0.961411	1.09066	0.0563197	1	0.81241	0
GCST90027804	0.43203	0.851749	0.481941	1.22156	3.33948	1	0.0676358	0.700553
GCST90027573	0.435564	1.04536	0.931342	1.15937	0.0266592	1	0.870301	0
GCST90027594	0.441338	1.07077	0.89061	1.25094	5.17626	1	0.0228976	0.80681
GCST90027848	0.442556	1.05258	0.918375	1.18678	7.04923	1	0.00792994	0.85814
GCST90027769	0.446399	1.20585	0.675984	1.73571	36.0034	1	1.96972e-09	0.972225
GCST90027838	0.44719	1.36716	0.420431	2.31388	25.8769	1	3.63895e-07	0.961356
GCST90027584	0.449035	1.11623	0.815301	1.41716	4.77284	1	0.0289121	0.790481
GCST90027463	0.45293	0.749889	0.0967477	1.40303	168.102	1	1.92191e-38	0.994051
GCST90027648	0.454316	1.22569	0.634507	1.81688	70.9673	1	3.63202e-17	0.985909
GCST90027487	0.454502	0.748572	0.0897006	1.40744	170.611	1	5.44253e-39	0.994139
GCST90027813	0.459303	1.04662	0.923145	1.17009	0.556639	1	0.455617	0
GCST90027850	0.463965	1.10249	0.828197	1.37678	2.66206	1	0.102768	0.624351
GCST90027756	0.465647	1.0455	0.923271	1.16773	1.61328	1	0.204031	0.380145
GCST90027524	0.468582	0.961757	0.858339	1.06517	0.185122	1	0.667008	0
GCST90027610	0.468967	0.794199	0.237193	1.35121	4.14495	1	0.041759	0.758742
GCST90027774	0.473706	1.30147	0.476763	2.12618	46.172	1	1.08313e-11	0.978342
GCST90027451	0.474329	0.936495	0.762524	1.11047	1.28711	1	0.256581	0.223067
GCST90027667	0.477161	1.44802	0.21277	2.68328	129.094	1	6.46809e-30	0.992254
GCST90027593	0.480295	0.8587	0.466335	1.25107	49.0178	1	2.53645e-12	0.979599
GCST90027808	0.488562	0.832235	0.357481	1.30699	93.4785	1	4.10639e-22	0.989302
GCST90027492	0.488669	1.06571	0.879705	1.25172	1.32235	1	0.25017	0.243773
GCST90027560	0.489094	0.964445	0.863705	1.06518	2.34228	1	0.125905	0.573066
GCST90027751	0.490319	1.05495	0.898827	1.21106	1.69294	1	0.193214	0.409313
GCST90027603	0.49845	0.924061	0.704189	1.14393	1.33794	1	0.247397	0.252583
GCST90027472	0.500363	1.07177	0.863046	1.28049	1.47118	1	0.225159	0.320275
GCST90027471	0.50392	0.7505	0.0188133	1.48219	44.0887	1	3.13826e-11	0.977318
GCST90027794	0.505946	1.0409	0.920379	1.16143	0.00868919	1	0.925732	0
GCST90027609	0.508535	1.15873	0.688165	1.62929	16.9707	1	3.79604e-05	0.941075
GCST90027704	0.511636	1.04837	0.903925	1.19281	2.81398	1	0.0934461	0.644632
GCST90027509	0.512643	0.867545	0.471032	1.26406	13.0515	1	0.000303037	0.923381
GCST90027689	0.516221	1.03959	0.920057	1.15913	3.41792	1	0.0644922	0.707424
GCST90027448	0.521803	0.973317	0.891674	1.05496	0.587259	1	0.443481	0
GCST90027527	0.523966	1.06243	0.870407	1.25446	4.24099	1	0.0394592	0.764206
GCST90027523	0.525687	1.04926	0.897114	1.20141	0.0165643	1	0.897593	0
GCST90027674	0.531431	1.30917	0.340897	2.27745	120.961	1	3.89633e-28	0.991733
GCST90027712	0.534515	1.13928	0.699782	1.57878	5.02547	1	0.0249772	0.801014
GCST90027654	0.542081	1.11614	0.742764	1.48952	10.8664	1	0.00097923	0.907973
GCST90027740	0.542088	1.11615	0.742743	1.48956	10.8663	1	0.000979285	0.907973
GCST90027852	0.544383	1.19623	0.561779	1.83068	33.4375	1	7.35914e-09	0.970093
GCST90027569	0.54769	1.18759	0.576046	1.79914	8.33559	1	0.00388757	0.880033
GCST90027514	0.548678	0.896774	0.559431	1.23412	9.28413	1	0.00231147	0.892289
GCST90027680	0.549979	1.01818	0.958573	1.07779	0.2616	1	0.609023	0
GCST90027775	0.55006	1.09334	0.787253	1.39942	4.59153	1	0.0321304	0.782208
GCST90027809	0.550456	1.01818	0.958497	1.07787	0.252359	1	0.615419	0
GCST90027574	0.560264	1.0939	0.777926	1.40987	3.77614	1	0.0519884	0.73518
GCST90027478	0.562672	0.684179	-0.385128	1.75349	1052.37	1	7.41998e-231	0.99905
GCST90027515	0.574948	0.883958	0.478381	1.28953	15.6968	1	7.43496e-05	0.936293
GCST90027651	0.577974	0.877124	0.444241	1.31001	132.795	1	1.00253e-30	0.99247
GCST90027748	0.577974	0.877119	0.444221	1.31002	132.792	1	1.00386e-30	0.992469
GCST90027836	0.57923	1.02739	0.930589	1.12418	0.00243343	1	0.960656	0
GCST90027547	0.581044	0.851932	0.326059	1.3778	21.8943	1	2.88089e-06	0.954326
GCST90027784	0.581948	0.816851	0.16483	1.46887	53.224	1	2.97604e-13	0.981211
GCST90027701	0.582496	1.14991	0.61545	1.68437	22.6584	1	1.93512e-06	0.955866
GCST90027525	0.582579	1.02698	0.930772	1.12319	0.462248	1	0.496575	0
GCST90027821	0.584298	1.1339	0.654236	1.61355	39.0217	1	4.19116e-10	0.974373
GCST90027668	0.586819	1.14572	0.620189	1.67124	21.4761	1	3.58271e-06	0.953437
GCST90027758	0.589262	1.03113	0.918131	1.14412	2.71995	1	0.0991011	0.632346
GCST90027803	0.590995	1.13727	0.636625	1.63791	15.7317	1	7.29896e-05	0.936434
GCST90027541	0.599421	1.01842	0.949688	1.08715	0.0228563	1	0.879831	0
GCST90027766	0.599894	0.943974	0.734638	1.15331	3.19902	1	0.0736822	0.687405
GCST90027736	0.601859	0.903098	0.539069	1.26713	124.251	1	7.4228e-29	0.991952
GCST90027662	0.601874	0.903113	0.539126	1.2671	124.254	1	7.4133e-29	0.991952
GCST90027688	0.60883	0.900381	0.518842	1.28192	133.071	1	8.72166e-31	0.992485
GCST90027716	0.611068	1.04507	0.871362	1.21878	1.57233	1	0.209869	0.364001
GCST90027638	0.613834	1.15965	0.539558	1.77974	24.6484	1	6.88019e-07	0.959429
GCST90027730	0.615033	0.930031	0.657339	1.20272	1.82373	1	0.17687	0.451674
GCST90027624	0.615641	1.04629	0.865559	1.22703	4.2375	1	0.0395404	0.764012
GCST90027782	0.618843	0.985012	0.925962	1.04406	1.22548	1	0.268287	0.183995
GCST90027754	0.620052	0.923762	0.622367	1.22516	76.6483	1	2.04286e-18	0.986953
GCST90027835	0.624074	0.947678	0.738428	1.15693	3.27792	1	0.070218	0.694928
GCST90027516	0.624424	0.914478	0.572109	1.25685	4.47815	1	0.0343309	0.776693
GCST90027504	0.624744	0.806029	0.0287931	1.58327	48.9303	1	2.65217e-12	0.979563
GCST90027532	0.625036	1.05162	0.844597	1.25865	8.36323	1	0.00382889	0.880429
GCST90027600	0.628469	0.981346	0.905787	1.0569	1.62724	1	0.202086	0.385461
GCST90027606	0.629552	1.04887	0.850307	1.24743	11.7407	1	0.000611494	0.914826
GCST90027513	0.634537	0.966385	0.827782	1.10499	1.8663	1	0.171899	0.464181
GCST90027725	0.636792	1.01423	0.95518	1.07327	0.213743	1	0.643849	0
GCST90027620	0.64341	0.951461	0.74596	1.15696	7.11504	1	0.007644	0.859453
GCST90027508	0.64622	0.905627	0.502665	1.30859	9.37291	1	0.00220216	0.89331
GCST90027489	0.646497	0.972472	0.854833	1.09011	7.83956	1	0.0051115	0.872442
GCST90027484	0.650556	0.912979	0.536462	1.2895	8.48691	1	0.00357711	0.882171
GCST90027665	0.65068	0.971026	0.845617	1.09644	0.135812	1	0.712481	0
GCST90027626	0.651136	1.0081	0.973004	1.04319	1.1906	1	0.275209	0.160085
GCST90027768	0.654965	0.96209	0.79582	1.12836	11.9713	1	0.000540257	0.916467
GCST90027818	0.655337	1.02405	0.91843	1.12968	0.000128769	1	0.990946	0
GCST90027497	0.656035	0.895121	0.433599	1.35664	2.59275	1	0.107354	0.614309
GCST90027588	0.664323	1.08091	0.715487	1.44633	33.0877	1	8.80951e-09	0.969777
GCST90027718	0.666068	1.02257	0.920055	1.12509	0.634109	1	0.425852	0
GCST90027727	0.674455	1.03884	0.857591	1.2201	14.1213	1	0.000171391	0.929185
GCST90027590	0.674785	1.04767	0.824988	1.27036	24.3444	1	8.05594e-07	0.958923
GCST90027637	0.679426	0.906951	0.465632	1.34827	16.5291	1	4.7908e-05	0.939501
GCST90027454	0.68143	0.919603	0.535751	1.30345	14.4963	1	0.000140437	0.931017
GCST90027601	0.688482	0.964422	0.790489	1.13835	0.313414	1	0.575593	0
GCST90027815	0.692756	0.924037	0.547226	1.30085	14.2283	1	0.000161917	0.929718
GCST90027811	0.699494	1.03545	0.855451	1.21545	13.5679	1	0.000230091	0.926296
GCST90027631	0.699947	0.974662	0.8458	1.10352	0.124998	1	0.723676	0
GCST90027480	0.700834	1.08308	0.659256	1.5069	12.153	1	0.000490098	0.917716
GCST90027512	0.705753	1.04033	0.83097	1.24969	1.55549	1	0.212328	0.357114
GCST90027741	0.710442	1.02666	0.885936	1.16738	1.35125	1	0.24506	0.259944
GCST90027655	0.710598	1.02665	0.885891	1.1674	1.35148	1	0.245019	0.260072
GCST90027567	0.711189	1.03675	0.842216	1.23128	1.51606	1	0.218217	0.340394
GCST90027561	0.711381	0.981294	0.882207	1.08038	1.04425	1	0.306834	0.0423773
GCST90027677	0.712394	1.02651	0.885556	1.16747	1.35339	1	0.244687	0.261113
GCST90027499	0.712628	0.98043	0.876296	1.08456	0.666965	1	0.414112	0
GCST90027767	0.71714	1.04036	0.822011	1.25871	8.32927	1	0.00390114	0.879941
GCST90027566	0.721642	0.97875	0.861842	1.09566	0.326255	1	0.567872	0
GCST90027714	0.722943	1.10244	0.536122	1.66875	43.6432	1	3.94038e-11	0.977087
GCST90027628	0.732026	0.91966	0.459823	1.3795	7.12783	1	0.00758966	0.859705
GCST90027709	0.73303	1.03461	0.835744	1.23347	61.6466	1	4.10977e-15	0.983779
GCST90027507	0.733756	1.0689	0.671856	1.46595	15.3853	1	8.76678e-05	0.935003
GCST90027842	0.734385	1.03341	0.840417	1.2264	59.9359	1	9.79999e-15	0.983315
GCST90027563	0.735828	1.02925	0.85932	1.19918	2.43412	1	0.11872	0.589174
GCST90027675	0.735951	1.09654	0.535428	1.65766	42.502	1	7.0611e-11	0.976472
GCST90027796	0.737354	1.09445	0.542443	1.64646	41.9406	1	9.40885e-11	0.976157
GCST90027652	0.748073	0.989651	0.926498	1.0528	0.599235	1	0.43887	0
GCST90027738	0.748179	0.989658	0.926519	1.0528	0.599737	1	0.438678	0
GCST90027749	0.751858	0.987906	0.912942	1.06287	1.11396	1	0.291223	0.102301
GCST90027642	0.752932	0.991626	0.939483	1.04377	0.010955	1	0.916641	0
GCST90027546	0.757287	1.04579	0.755378	1.33621	7.04596	1	0.00794442	0.858075
GCST90027806	0.764782	1.01449	0.919571	1.10941	2.01926	1	0.155315	0.504768
GCST90027676	0.767614	0.980692	0.852625	1.10876	0.234529	1	0.628186	0
GCST90027645	0.767991	0.986582	0.897434	1.07573	1.03626	1	0.308692	0.0349936
GCST90027829	0.769363	0.925728	0.42925	1.42221	37.4739	1	9.26465e-10	0.973315
GCST90027790	0.774577	0.970287	0.766947	1.17363	6.09483	1	0.0135578	0.835927
GCST90027722	0.778394	1.01469	0.912365	1.11702	2.2163	1	0.13656	0.548797
GCST90027763	0.779066	0.978314	0.826807	1.12982	1.19358	1	0.274608	0.162188
GCST90027691	0.78003	0.987917	0.903118	1.07272	0.0446498	1	0.832649	0
GCST90027581	0.791433	0.959774	0.661643	1.25791	7.02909	1	0.0080196	0.857734
GCST90027724	0.791803	1.01429	0.908157	1.12043	1.92497	1	0.16531	0.480512
GCST90027583	0.79667	1.07444	0.508209	1.64066	35.6689	1	2.33865e-09	0.971964
GCST90027562	0.800407	0.959209	0.642977	1.27544	11.1235	1	0.000852395	0.9101
GCST90027470	0.800594	0.988893	0.902705	1.07508	0.00916355	1	0.923738	0
GCST90027678	0.802842	1.03062	0.790247	1.27099	6.25739	1	0.0123676	0.840189
GCST90027457	0.806478	1.03341	0.766139	1.30067	1.83206	1	0.175884	0.454167
GCST90027587	0.812476	1.06137	0.554316	1.56843	24.1172	1	9.06478e-07	0.958536
GCST90027503	0.814553	1.00939	0.930901	1.08789	0.43501	1	0.509541	0
GCST90027490	0.815109	1.03158	0.766856	1.29631	7.65809	1	0.00565182	0.869419
GCST90027713	0.818337	1.0794	0.401839	1.75697	41.3754	1	1.25626e-10	0.975831
GCST90027625	0.818827	1.02491	0.811734	1.23809	6.36416	1	0.0116448	0.84287
GCST90027717	0.819083	0.994555	0.947892	1.04122	0.140096	1	0.708186	0
GCST90027491	0.831378	1.01022	0.916145	1.1043	0.494822	1	0.481784	0
GCST90027453	0.832025	1.02348	0.806492	1.24047	2.69904	1	0.100409	0.629497
GCST90027793	0.834843	1.0362	0.695899	1.3765	9.04856	1	0.00262902	0.889485
GCST90027591	0.837801	1.01393	0.880596	1.14726	5.40148	1	0.0201196	0.814866
GCST90027458	0.86355	0.967456	0.596305	1.33861	9.85349	1	0.0016951	0.898513
GCST90027760	0.867047	0.97431	0.673543	1.27508	3.10358	1	0.0781204	0.677791
GCST90027840	0.873483	1.01686	0.809392	1.22432	20.4881	1	6.00034e-06	0.951191
GCST90027750	0.876319	0.990444	0.870101	1.11079	1.62417	1	0.202512	0.3843
GCST90027557	0.879509	0.992143	0.890565	1.09372	7.95875	1	0.00478556	0.874352
GCST90027493	0.881123	1.01223	0.851932	1.17253	3.39883	1	0.0652426	0.705781
GCST90027735	0.882369	0.980842	0.727072	1.23461	11.0277	1	0.000897607	0.909319
GCST90027476	0.888892	1.02885	0.62405	1.43366	10.2379	1	0.00137582	0.902324
GCST90027695	0.890976	0.992318	0.882471	1.10217	0.438627	1	0.507786	0
GCST90027825	0.901136	1.00494	0.926988	1.08289	0.0250447	1	0.874256	0
GCST90027720	0.90242	0.985322	0.750685	1.21996	7.47673	1	0.00625016	0.866252
GCST90027522	0.902571	1.01908	0.713611	1.32455	6.05648	1	0.0138553	0.834888
GCST90027817	0.903685	1.00349	0.947038	1.05993	1.16306	1	0.280832	0.140197
GCST90027757	0.909131	0.989134	0.802545	1.17572	11.1159	1	0.000855931	0.910038
GCST90027553	0.909817	0.970045	0.451708	1.48838	28.6583	1	8.63419e-08	0.965106
GCST90027672	0.920783	0.984082	0.670355	1.29781	15.7582	1	7.19769e-05	0.936541
GCST90027810	0.921148	0.988934	0.769833	1.20804	14.0319	1	0.000179734	0.928734
GCST90027681	0.922043	0.989067	0.770107	1.20803	14.0172	1	0.00018115	0.928659
GCST90027771	0.927256	1.02122	0.565577	1.47687	29.1801	1	6.59526e-08	0.96573
GCST90027517	0.927262	0.98556	0.675528	1.29559	2.5777	1	0.108379	0.612058
GCST90027540	0.927657	1.00323	0.93358	1.07287	0.172445	1	0.677948	0
GCST90027753	0.931991	0.99084	0.780475	1.20121	10.6327	1	0.00111105	0.905951
GCST90027742	0.933438	0.987114	0.684721	1.28951	2.89805	1	0.0886868	0.65494
GCST90027656	0.933495	0.987126	0.684751	1.2895	2.89776	1	0.0887027	0.654906
GCST90027726	0.933954	0.990709	0.770977	1.21044	14.4735	1	0.000142145	0.930908
GCST90027506	0.940608	0.997801	0.939966	1.05564	0.085875	1	0.769488	0
GCST90027762	0.94317	1.00456	0.879286	1.12983	0.149418	1	0.699092	0
GCST90027633	0.9493	1.00973	0.709846	1.30961	8.31969	1	0.00392175	0.879803
GCST90027715	0.952248	0.997347	0.910528	1.08417	0.710483	1	0.399284	0
GCST90027847	0.952415	0.963761	-0.226479	2.154	107.497	1	3.46366e-25	0.990697
GCST90027495	0.957303	0.982948	0.35871	1.60719	41.9079	1	9.56777e-11	0.976138
GCST90027739	0.960125	0.998909	0.956137	1.04168	0.416039	1	0.51892	0
GCST90027576	0.965523	1.00198	0.912323	1.09163	0.748894	1	0.386826	0
GCST90027786	0.96588	0.99896	0.951309	1.04661	0.178629	1	0.672554	0
GCST90027791	0.973436	0.99802	0.88147	1.11457	1.91223	1	0.166716	0.47705
GCST90027671	0.9736	1.00399	0.767943	1.24003	8.0551	1	0.00453756	0.875855
GCST90027455	0.975247	1.00527	0.672545	1.33799	6.32974	1	0.011873	0.842016
GCST90027572	0.995335	1.00102	0.660327	1.34171	5.2737	1	0.02165	0.81038
GCST90027798	0.995409	0.999858	0.951591	1.04813	0.286655	1	0.592372	0
