# Supplementary material
Source: Frontiers journal article supplement (https://www.frontiersin.org/articles/1413183)
Supplement: Table_10.xlsx [file Table_10.xlsx]

## Sheet: content
Content
S10.1 The resluts of reverse MR analysis between immune cells phenotypes and the risk of AAA in two databases.
S10.2 The resluts of reverse MR analysis between peripheral blood metabolites phenotypes and the risk of AAA in two databases.
S10.3 The resluts of reverse MR analysis between immune factors and the risk of AAA in two databases.
S10.4 The resluts of reverse MR analysis between gut microbiota phenotypes and the risk of AAA in two databases.

## Sheet: S10.1
The resluts of reverse MR analysis between immune cells phenotypes and the risk of AAA in two databases.
exposure.id	outcome.id	nsnp	MR-Egger			Weighted median			Inverse variance weighted			Simple mode			Weighted mode			MR-Egger intercept		MR-PRESSO global	MR-IVW			MR-Egeer
			p_value	OR	95% OR	p_value	OR	95% OR	p_value	OR	95% OR	p_value	OR	95% OR	p_value	OR	95% OR	egger intercept	p_value	p_value	Q	Q_df	Q_pval	Q	Q_df	Q_pval
FinnGen_AAA	GCST90001997	146	0.595	0.98447	0.92941-1.0428	0.678	1.01397	0.94969-1.08261	0.925	1.0017	0.96716-1.03746	0.981	0.99851	0.88479-1.12685	0.808	1.00671	0.95391-1.06243	0.00406	0.45682	0.062	175.213	145	0.04433	174.538	144	0.0423
UKB_AAA	GCST90001997	99	0.117	1.02452	0.99424-1.0557	0.817	1.0033	0.97568-1.03171	0.949	1.00058	0.98296-1.01852	0.428	1.02204	0.96858-1.07845	0.903	1.00211	0.96891-1.03644	-0.0153	0.05989	0.146	112.421	98	0.15138	108.371	97	0.20216
FinnGen_AAA	GCST90001614	147	0.246	1.03196	0.97881-1.0880	0.87	1.00536	0.94290-1.07195	0.212	1.02088	0.98831-1.05453	0.301	1.05852	0.95077-1.17847	0.736	1.01029	0.95197-1.07219	-0.00255	0.61298	0.183	161.541	146	0.17938	161.255	145	0.16857
UKB_AAA	GCST90001614	99	0.188	0.9815	0.95481-1.0089	0.429	0.98951	0.96402-1.01568	0.626	0.99601	0.98009-1.01218	0.849	1.00471	0.95731-1.05446	0.665	0.99262	0.95996-1.02639	0.00949	0.20207	0.709	89.4749	98	0.71889	87.8253	97	0.73645
FinnGen_AAA	GCST90001675	146	0.856	1.00495	0.95291-1.0598	0.822	1.00769	0.94245-1.07746	0.748	1.0053	0.97340-1.03824	0.784	0.98456	0.88095-1.10036	0.835	1.00635	0.94816-1.06811	8e-05	0.98716	0.959	115.931	145	0.96381	115.93	144	0.95869
UKB_AAA	GCST90001675	99	0.097	1.02563	0.99576-1.0564	0.965	0.99939	0.97280-1.02671	0.909	1.00103	0.98366-1.01869	0.353	0.97091	0.91255-1.03300	0.788	0.99489	0.95842-1.03274	-0.01565	0.05031	0.261	107.227	98	0.24612	103.054	97	0.3179
FinnGen_AAA	GCST90001575	147	0.675	1.01078	0.96140-1.0627	0.395	1.0264	0.96655-1.08996	0.702	1.006	0.97568-1.03726	0.456	0.96169	0.86808-1.06539	0.863	1.005	0.94982-1.06338	-0.00111	0.81474	0.845	127.58	146	0.86158	127.525	145	0.84872
UKB_AAA	GCST90001575	99	0.375	1.01323	0.98436-1.0430	0.29	1.01347	0.98866-1.03891	0.634	1.0041	0.98731-1.02117	0.253	1.03246	0.97775-1.09023	0.241	1.02153	0.98600-1.05834	-0.00586	0.45121	0.185	110.166	98	0.18872	109.52	97	0.18133
FinnGen_AAA	GCST90001523	146	0.109	1.06055	0.98743-1.1391	0.028	1.08415	1.00879-1.16514	0.153	1.03234	0.98827-1.07837	0.341	0.9244	0.78670-1.08621	0.063	1.08171	0.99639-1.17435	-0.0063	0.35169	0.295	153.364	145	0.30118	152.44	144	0.29908
UKB_AAA	GCST90001523	99	0.182	1.02751	0.98766-1.0690	0.932	0.99845	0.96340-1.03477	0.838	0.99757	0.97458-1.02110	0.836	0.9928	0.92734-1.06288	0.782	0.9928	0.94346-1.04471	-0.01902	0.07443	0.243	107.913	98	0.23185	104.412	97	0.28543
FinnGen_AAA	GCST90001547	147	0.637	0.98676	0.93376-1.0428	0.85	1.00553	0.94973-1.06462	0.237	1.02055	0.98670-1.05556	0.726	1.02381	0.89762-1.16773	0.163	0.94375	0.87032-1.02337	0.00783	0.13416	0.074	170.174	146	0.0835	167.552	145	0.09681
UKB_AAA	GCST90001547	99	0.548	1.0086	0.98092-1.0371	0.999	0.99998	0.97446-1.02616	0.911	1.00093	0.98480-1.01731	0.748	0.99132	0.94007-1.04535	0.942	1.00146	0.96322-1.04121	-0.00493	0.5091	0.556	94.3914	98	0.58441	93.9522	97	0.56873
FinnGen_AAA	GCST90001995	146	0.477	0.97965	0.92581-1.0366	0.385	1.02573	0.96860-1.08623	0.918	0.99819	0.96439-1.03319	0.746	0.98284	0.88517-1.09128	0.802	1.00725	0.95195-1.06576	0.00438	0.41298	0.066	171.069	145	0.06861	170.272	144	0.06661
UKB_AAA	GCST90001995	99	0.234	1.01847	0.98841-1.0494	0.727	0.99531	0.96933-1.02199	0.912	0.999	0.98154-1.01677	0.542	1.01737	0.96273-1.07512	0.782	0.9952	0.96198-1.02957	-0.01249	0.12292	0.165	112.093	98	0.15645	109.362	97	0.18411
FinnGen_AAA	GCST90002091	146	0.566	1.02209	0.94878-1.1011	0.362	1.03625	0.95985-1.11872	0.296	1.02467	0.97886-1.07262	0.615	0.95554	0.80069-1.14034	0.542	1.02713	0.94268-1.11914	0.00059	0.93301	0.633	137.388	145	0.66119	137.381	144	0.63935
UKB_AAA	GCST90002091	99	0.676	1.00892	0.96790-1.0517	0.865	0.99656	0.95764-1.03706	0.613	1.00623	0.98230-1.03075	0.772	0.98709	0.90411-1.07768	0.952	1.00193	0.94151-1.06623	-0.00172	0.87693	0.487	97.9518	98	0.48237	97.9275	97	0.45453
FinnGen_AAA	GCST90001678	146	0.542	1.01565	0.96633-1.0675	0.573	1.01674	0.95973-1.07714	0.656	1.00689	0.97692-1.03777	0.383	1.04504	0.94678-1.15351	0.574	1.01705	0.95901-1.07860	-0.00201	0.66831	0.902	124.203	145	0.89351	124.019	144	0.88434
UKB_AAA	GCST90001678	99	0.296	1.01534	0.98689-1.0446	0.953	0.99925	0.97428-1.02486	0.74	0.99718	0.98067-1.01397	0.34	0.97345	0.92138-1.02847	0.872	0.997	0.96137-1.03395	-0.01164	0.12862	0.163	111.226	98	0.17044	108.596	97	0.19795
FinnGen_AAA	GCST90001921	146	0.706	1.01041	0.95760-1.0661	0.977	0.99899	0.93120-1.07171	0.802	0.99575	0.96326-1.02935	0.492	0.95564	0.84000-1.08719	0.694	0.98838	0.93249-1.04761	-0.00347	0.49849	0.588	140.204	145	0.59697	139.744	144	0.5847
UKB_AAA	GCST90001921	99	0.509	0.98998	0.96097-1.0199	0.924	1.00133	0.97425-1.02916	0.337	1.00863	0.99111-1.02645	0.67	0.98763	0.93290-1.04557	0.65	0.99209	0.95868-1.02665	0.01211	0.13277	0.461	99.283	98	0.44479	96.9848	97	0.48134
FinnGen_AAA	GCST90001814	146	0.659	1.01238	0.95863-1.0692	0.677	1.01478	0.94711-1.08730	0.886	1.00244	0.96967-1.03632	0.966	0.99731	0.88187-1.12785	0.689	1.01339	0.94964-1.08143	-0.00231	0.65491	0.068	169.354	145	0.0814	169.119	144	0.07484
UKB_AAA	GCST90001814	99	0.813	0.99668	0.96974-1.0244	0.322	0.98712	0.96209-1.01279	0.482	0.99427	0.97848-1.01032	0.152	0.96309	0.91509-1.01360	0.257	0.98168	0.95093-1.01341	-0.00156	0.83165	0.722	89.5631	98	0.71663	89.5177	97	0.69268
FinnGen_AAA	GCST90002029	146	0.877	1.00439	0.95010-1.0618	0.701	0.98745	0.92578-1.05324	0.694	0.99317	0.95988-1.02762	0.858	1.01008	0.90510-1.12723	0.741	1.01008	0.95197-1.07173	-0.00264	0.61657	0.752	133.553	145	0.74258	133.301	144	0.72815
UKB_AAA	GCST90002029	99	0.199	1.02072	0.98945-1.0530	0.335	1.01439	0.98533-1.04432	0.419	1.00753	0.98936-1.02604	0.49	1.0198	0.96485-1.07788	0.493	1.01575	0.97150-1.06202	-0.00843	0.315	0.347	102.483	98	0.35834	101.416	97	0.3594
FinnGen_AAA	GCST90002025	146	0.834	1.00664	0.94621-1.0709	0.392	1.02837	0.96458-1.09638	0.443	1.01495	0.97722-1.05415	0.286	0.94447	0.85072-1.04856	0.337	1.02863	0.97124-1.08942	0.00194	0.74206	0.053	175.518	145	0.04286	175.386	144	0.03848
UKB_AAA	GCST90002025	99	0.948	1.00112	0.96828-1.0351	0.745	1.0048	0.97619-1.03424	0.674	0.99584	0.97668-1.01537	0.796	0.9923	0.93609-1.05189	0.993	0.99983	0.96534-1.03556	-0.00343	0.70213	0.129	114.412	98	0.12311	114.239	97	0.11155
FinnGen_AAA	GCST90001763	146	0.844	0.99454	0.94186-1.0502	0.379	1.02278	0.97276-1.07538	0.713	0.99379	0.96138-1.02729	0.575	1.02948	0.93030-1.13924	0.455	1.02061	0.96752-1.07661	-0.00018	0.97252	0.152	162.262	145	0.1551	162.26	144	0.14175
UKB_AAA	GCST90001763	99	0.926	0.99868	0.97127-1.0269	0.574	1.00731	0.98206-1.03320	0.568	1.00476	0.98853-1.02126	0.918	1.00286	0.94995-1.05873	0.569	1.01034	0.97533-1.04661	0.00393	0.59961	0.801	85.4331	98	0.81353	85.1557	97	0.79935
FinnGen_AAA	GCST90001447	146	0.152	0.9621	0.91279-1.0141	0.819	0.99269	0.93236-1.05693	0.75	0.99475	0.96310-1.02744	0.388	1.0512	0.93891-1.17692	0.72	0.98976	0.93564-1.04701	0.00781	0.11826	0.165	162.664	145	0.14994	159.922	144	0.17242
UKB_AAA	GCST90001447	99	0.343	0.9858	0.95724-1.0152	0.931	0.99884	0.97267-1.02570	0.47	1.00642	0.98910-1.02405	0.703	1.00982	0.96047-1.06171	0.905	0.99794	0.96480-1.03222	0.0134	0.09206	0.079	117.476	98	0.08766	114.072	97	0.11361
FinnGen_AAA	GCST90002003	146	0.257	0.96941	0.91894-1.0226	0.34	0.97378	0.92207-1.02840	0.645	0.99237	0.96053-1.02526	0.287	1.05712	0.95477-1.17044	0.506	0.98265	0.93337-1.03453	0.00546	0.28071	0.212	160.405	145	0.18056	159.109	144	0.18408
UKB_AAA	GCST90002003	99	0.265	1.01591	0.98827-1.0443	0.394	1.01067	0.98631-1.03563	0.641	1.00384	0.98780-1.02014	0.493	1.0177	0.96809-1.06986	0.354	1.01578	0.98285-1.04982	-0.00772	0.29808	0.847	84.022	98	0.84184	82.9275	97	0.84502
FinnGen_AAA	GCST90001875	144	0.67	0.98192	0.90290-1.0679	0.848	0.99049	0.89841-1.09200	0.143	0.96265	0.91487-1.01294	0.784	0.97399	0.80670-1.17597	0.86	0.99201	0.90758-1.08428	-0.00459	0.56131	0.647	135.574	143	0.65813	135.234	142	0.64367
UKB_AAA	GCST90001875	98	0.335	0.9775	0.93356-1.0235	0.566	0.98771	0.94685-1.03033	0.176	0.98171	0.95581-1.00831	0.047	0.92344	0.85449-0.99795	0.966	1.00127	0.94522-1.06064	0.00274	0.82274	0.792	85.3987	97	0.79397	85.3483	96	0.77354
FinnGen_AAA	GCST90001835	146	0.37	1.02536	0.97090-1.0829	0.319	1.03377	0.96843-1.10352	0.105	1.02812	0.99421-1.06318	0.354	0.94672	0.84352-1.06254	0.364	1.02902	0.96752-1.09444	0.00063	0.90287	0.83	130.389	145	0.8021	130.374	144	0.78527
UKB_AAA	GCST90001835	99	0.422	1.01237	0.98254-1.0431	0.412	1.01145	0.98432-1.03932	0.052	1.01753	0.99987-1.03550	0.359	1.02642	0.97106-1.08494	0.645	1.00855	0.97281-1.04561	0.0033	0.68227	0.637	92.5734	98	0.63576	92.4048	97	0.61302
FinnGen_AAA	GCST90002120	146	0.051	1.05803	1.00014-1.1193	0.456	1.02779	0.95638-1.10453	0.212	1.02223	0.98751-1.05816	0.214	0.92776	0.82470-1.04369	0.132	1.04741	0.98654-1.11203	-0.00811	0.13085	0.598	142.012	145	0.55467	139.703	144	0.58564
UKB_AAA	GCST90002120	99	0.882	0.99766	0.96735-1.0289	0.745	1.00469	0.97670-1.03348	0.636	0.99566	0.97785-1.01379	0.57	1.01569	0.96271-1.07157	0.605	1.0098	0.97330-1.04768	-0.0013	0.87534	0.797	87.1909	98	0.77468	87.1662	97	0.75273
FinnGen_AAA	GCST90002117	146	0.482	1.02152	0.96286-1.0838	0.257	1.03784	0.97327-1.10669	0.701	0.99286	0.95718-1.02987	0.933	0.99482	0.88199-1.12210	0.216	1.03508	0.98023-1.09300	-0.00676	0.2323	0.119	165.053	145	0.12181	163.42	144	0.12809
UKB_AAA	GCST90002117	99	0.032	0.96285	0.93062-0.9962	0.019	0.96538	0.93734-0.99425	0.059	0.98094	0.96151-1.00076	0.235	0.96185	0.90243-1.02518	0.078	0.96427	0.92644-1.00364	0.01208	0.18964	0.055	121.247	98	0.05574	119.105	97	0.06333
FinnGen_AAA	GCST90001897	146	0.282	1.03208	0.97461-1.0929	0.125	1.04807	0.98710-1.11281	0.657	1.00799	0.97316-1.04407	0.459	1.05084	0.92191-1.19780	0.349	1.0323	0.96609-1.10305	-0.00556	0.30795	0.267	155.188	145	0.2664	154.068	144	0.26794
UKB_AAA	GCST90001897	99	0.338	1.01522	0.98446-1.0470	0.993	0.99987	0.97246-1.02806	0.252	1.01053	0.99258-1.02880	0.924	0.99697	0.93684-1.06095	0.537	1.01379	0.97077-1.05871	-0.00301	0.71645	0.452	99.941	98	0.4265	99.8045	97	0.40237
FinnGen_AAA	GCST90001893	146	0.095	0.95281	0.90053-1.0081	0.046	0.93955	0.88369-0.99894	0.246	0.97965	0.94620-1.01430	0.866	1.01068	0.89366-1.14302	0.115	0.94729	0.88591-1.01293	0.00656	0.22325	0.387	147.53	145	0.4259	146.013	144	0.43749
UKB_AAA	GCST90001893	99	0.29	0.98346	0.95368-1.0142	0.757	1.00463	0.97563-1.03449	0.332	0.99113	0.97345-1.00913	0.852	0.99438	0.93754-1.05468	0.981	1.00044	0.96460-1.03761	0.00505	0.54269	0.662	92.1314	98	0.64802	91.7582	97	0.63128
FinnGen_AAA	GCST90002033	146	0.935	1.00237	0.94713-1.0608	0.39	1.02636	0.96722-1.08913	0.8	1.00451	0.97014-1.04009	0.744	0.98017	0.86935-1.10511	0.598	1.01605	0.95774-1.07791	0.0005	0.92568	0.936	120.751	145	0.92954	120.742	144	0.92106
UKB_AAA	GCST90002033	99	0.261	0.98164	0.95059-1.0137	0.467	0.98967	0.96239-1.01773	0.471	0.99312	0.97464-1.01195	0.525	0.98025	0.92197-1.04221	0.265	0.98025	0.94663-1.01506	0.00754	0.38424	0.318	104.595	98	0.30563	103.778	97	0.30037
FinnGen_AAA	GCST90001429	146	0.246	0.96854	0.91781-1.0221	0.974	0.99903	0.94208-1.05942	0.441	0.98713	0.95514-1.02019	0.902	0.99339	0.89395-1.10388	0.388	0.97668	0.92586-1.03030	0.00447	0.38221	0.094	167.02	145	0.10177	166.134	144	0.09998
UKB_AAA	GCST90001429	99	0.855	1.00257	0.97550-1.0304	0.351	0.98781	0.96265-1.01362	0.614	1.00412	0.98823-1.02026	0.519	0.98414	0.93762-1.03296	0.43	0.98579	0.95155-1.02128	0.001	0.89189	0.47	98.3469	98	0.47115	98.3281	97	0.44324
FinnGen_AAA	GCST90001650	147	0.448	1.02039	0.96865-1.0749	0.729	1.01044	0.95270-1.07168	0.089	1.02811	0.99580-1.06147	0.083	1.09452	0.98883-1.21150	0.307	1.03247	0.97134-1.09745	0.00178	0.71922	0.34	154.38	146	0.30147	154.242	145	0.28415
UKB_AAA	GCST90001650	99	0.727	0.99507	0.96788-1.0230	0.946	1.00088	0.97565-1.02675	0.544	0.995	0.97900-1.01125	0.191	0.96413	0.91307-1.01804	0.679	0.99256	0.95820-1.02815	-5e-05	0.99481	0.746	88.3166	98	0.74788	88.3165	97	0.72402
FinnGen_AAA	GCST90001873	144	0.389	0.96278	0.88335-1.0494	0.93	0.99553	0.90032-1.10081	0.168	0.96397	0.91495-1.01562	0.739	1.03023	0.86489-1.22716	0.639	0.9785	0.89373-1.07131	0.00029	0.97192	0.66	136.286	143	0.642	136.285	142	0.61947
UKB_AAA	GCST90001873	98	0.947	1.00161	0.95547-1.0500	0.129	0.96929	0.93104-1.00911	0.923	0.99866	0.97166-1.02640	0.249	0.94775	0.86560-1.03769	0.266	0.9643	0.90484-1.02767	-0.00188	0.88064	0.778	85.5578	97	0.79041	85.5351	96	0.76913
FinnGen_AAA	GCST90001766	146	0.975	0.99916	0.94889-1.0521	0.259	0.96824	0.91549-1.02404	0.77	0.99529	0.96433-1.02724	0.339	0.95088	0.85795-1.05389	0.482	0.98136	0.93135-1.03406	-0.00091	0.85226	0.668	138.166	145	0.64373	138.131	144	0.62217
UKB_AAA	GCST90001766	99	0.04	0.96705	0.93696-0.9981	0.553	0.99166	0.96458-1.01950	0.392	0.99184	0.97341-1.01062	0.249	0.96381	0.90557-1.02580	0.124	0.96879	0.93080-1.00833	0.01642	0.05585	0.023	127.81	98	0.02321	123.058	97	0.03817
FinnGen_AAA	GCST90001424	146	0.531	1.01703	0.96477-1.0721	0.776	1.00731	0.95795-1.05920	0.476	0.98829	0.95676-1.02085	0.971	0.99778	0.88531-1.12454	0.562	1.01761	0.95943-1.07932	-0.00674	0.17976	0.159	161.654	145	0.16314	159.639	144	0.17642
UKB_AAA	GCST90001424	99	0.01	1.03757	1.00951-1.0664	0.969	1.00052	0.97481-1.02691	0.263	1.00945	0.99298-1.02619	0.854	0.99478	0.94089-1.05176	0.779	0.99478	0.95925-1.03164	-0.01784	0.01723	0.325	104.527	98	0.30726	98.5591	97	0.43677
FinnGen_AAA	GCST90001497	147	0.869	1.00437	0.95363-1.0578	0.473	1.0203	0.96586-1.07782	0.672	1.0069	0.97535-1.03948	0.793	0.98607	0.88830-1.09461	0.71	1.01129	0.95339-1.07271	0.00059	0.90426	0.862	128.811	146	0.84349	128.797	145	0.82892
UKB_AAA	GCST90001497	99	0.853	1.00268	0.97470-1.0315	0.585	1.00713	0.98174-1.03318	0.605	1.00438	0.98788-1.02116	0.713	1.01042	0.95630-1.06761	0.849	1.00357	0.96749-1.04099	0.0011	0.8849	0.535	96.8854	98	0.51286	96.8643	97	0.48479
FinnGen_AAA	GCST90001940	147	0.832	1.00602	0.95181-1.0633	0.973	1.00108	0.94050-1.06556	0.794	0.99553	0.96266-1.02954	0.257	1.06679	0.95446-1.19235	0.423	1.02457	0.96566-1.08708	-0.00243	0.64121	0.216	159.255	146	0.21414	159.016	145	0.20135
UKB_AAA	GCST90001940	99	0.604	0.99241	0.96437-1.0213	0.354	0.98767	0.96210-1.01392	0.105	0.98625	0.96989-1.00288	0.88	1.00486	0.94384-1.06982	0.928	1.00208	0.95821-1.04796	-0.00402	0.60112	0.734	89.3065	98	0.72319	89.0313	97	0.70552

## Sheet: S10.2
The resluts of reverse MR analysis between peripheral blood metabolites phenotypes and the risk of AAA in two databases.
exposure.id	outcome.id	nsnp	MR-Egger			Weighted median			Inverse variance weighted			Simple mode			Weighted mode			MR-Egger intercept		MR-PRESSO global	MR-IVW			MR-Egeer
			p_value	OR	95% OR	p_value	OR	95% OR	p_value	OR	95% OR	p_value	OR	95% OR	p_value	OR	95% OR	egger intercept	p_value	p_value	Q	Q_df	Q_pval	Q	Q_df	Q_pval
FinnGen_AAA	GCST90199622	146	0.139	1.03085	0.99040-1.0729	0.554	1.01312	0.97032-1.05779	0	1.04029	1.01744-1.06365	0.445	1.03558	0.94704-1.13239	0.629	1.01261	0.96246-1.06539	0.00186	0.59233	0.658	136.841	145	0.6733	136.553	144	0.65804
FinnGen_AAA	GCST90200984	146	0.238	0.97485	0.93465-1.0168	0.568	1.01155	0.97244-1.05223	0.014	0.97121	0.94882-0.99413	0.675	1.02153	0.92481-1.12835	0.488	1.01888	0.96657-1.07403	-0.00077	0.83428	0.124	165.15	145	0.12076	165.1	144	0.11007
UKB_AAA	GCST90200206	103	0.448	1.00818	0.98728-1.0295	0.225	0.99024	0.97468-1.00605	0.024	0.98698	0.97581-0.99828	0.877	0.9964	0.95205-1.04282	0.972	0.99927	0.95889-1.04135	-0.01258	0.01994	0.463	102.668	102	0.46282	97.0746	101	0.59203
UKB_AAA	GCST90200848	103	0.052	0.98047	0.96142-0.9999	0.153	0.98867	0.97335-1.00424	0.025	0.98797	0.97755-0.99851	0.28	0.97577	0.93351-1.01995	0.371	0.98101	0.94085-1.02288	0.0045	0.36755	0.422	103.935	102	0.42807	103.099	101	0.42327
UKB_AAA	GCST90200393	103	0.123	0.98491	0.96623-1.0040	0.291	0.99206	0.97752-1.00683	0.077	0.99069	0.98048-1.00102	0.713	0.99223	0.95197-1.03419	0.69	0.99223	0.95507-1.03083	0.00346	0.47783	0.633	97.5877	102	0.60512	97.0801	101	0.59188
FinnGen_AAA	GCST90200247	146	0.573	1.01182	0.97138-1.0539	0.94	0.99865	0.96426-1.03426	0.078	0.9797	0.95763-1.00228	0.893	0.99395	0.90986-1.08581	0.317	1.02619	0.97564-1.07937	-0.00658	0.0647	0.371	148.569	145	0.40246	145.078	144	0.45913
UKB_AAA	GCST90200370	103	0.455	0.99278	0.97415-1.0118	0.044	0.9851	0.97080-0.99961	0.09	0.99118	0.98109-1.00137	0.19	0.97213	0.93217-1.01380	0.196	0.97451	0.93733-1.01318	-0.00095	0.84309	0.521	101.391	102	0.49841	101.351	101	0.47146
FinnGen_AAA	GCST90200990	146	0.685	1.00927	0.96532-1.0552	0.417	1.02042	0.97177-1.07151	0.097	1.02112	0.99620-1.04665	0.941	1.0036	0.91222-1.10412	0.706	1.00999	0.95917-1.06351	0.00239	0.53757	0.105	167.873	145	0.09391	167.429	144	0.08837
UKB_AAA	GCST90199984	103	0.569	1.00723	0.98261-1.0325	0.051	1.01852	0.99989-1.03750	0.104	1.0112	0.99773-1.02486	0.282	1.03106	0.97550-1.08978	0.282	1.02745	0.97824-1.07913	0.00233	0.71174	0.808	89.6998	102	0.80269	89.5625	101	0.78521
UKB_AAA	GCST90200787	103	0.085	0.98293	0.96406-1.0022	0.108	0.98739	0.97221-1.00280	0.105	0.99135	0.98101-1.00181	0.236	0.97447	0.93387-1.01683	0.252	0.97581	0.93595-1.01736	0.00504	0.30753	0.636	97.2425	102	0.61468	96.1907	101	0.61669
UKB_AAA	GCST90200684	103	0.033	0.97802	0.95847-0.9980	0.996	1.00004	0.98457-1.01576	0.121	0.9914	0.98063-1.00229	0.443	1.01698	0.97433-1.06149	0.422	1.01774	0.97517-1.06217	0.00803	0.12012	0.809	88.8472	102	0.8203	86.3901	101	0.84958
UKB_AAA	GCST90199831	103	0.078	0.98239	0.96335-1.0018	0.357	0.99312	0.97865-1.00781	0.124	0.99172	0.98128-1.00228	0.747	0.99335	0.95405-1.03428	0.695	0.9925	0.95590-1.03050	0.00559	0.26288	0.738	92.4426	102	0.74028	91.175	101	0.74785
FinnGen_AAA	GCST90200092	146	0.239	1.03208	0.97943-1.0876	0.254	1.02924	0.97956-1.08144	0.141	1.022	0.99283-1.05202	0.958	0.99706	0.89294-1.11333	0.327	1.03655	0.96497-1.11344	-0.002	0.65978	0.913	123.263	145	0.90436	123.068	144	0.89599
UKB_AAA	GCST90200997	103	0.674	1.00416	0.98495-1.0237	0.954	1.00045	0.98532-1.01581	0.143	1.00783	0.99736-1.01841	0.685	0.99231	0.95612-1.02986	0.729	0.99385	0.95979-1.02911	0.00215	0.66077	0.689	95.037	102	0.6744	94.8433	101	0.65363
FinnGen_AAA	GCST90200615	146	0.828	1.00471	0.96302-1.0482	0.016	1.04474	1.00828-1.08252	0.162	1.01692	0.99329-1.04112	0.206	1.06136	0.96825-1.16342	0.032	1.0518	1.00474-1.10107	0.00247	0.50259	0.06	172.826	145	0.05724	172.285	144	0.05399
FinnGen_AAA	GCST90200855	146	0.544	1.01155	0.97479-1.0497	0.619	0.98979	0.95062-1.03058	0.164	0.98553	0.96550-1.00598	0.457	1.03193	0.95006-1.12085	0.729	1.00799	0.96363-1.05440	-0.00532	0.09947	0.794	130.677	145	0.79701	127.928	144	0.8277
UKB_AAA	GCST90200531	103	0.444	0.99219	0.97253-1.0122	0.396	0.99325	0.97782-1.00892	0.165	0.99239	0.98173-1.00316	0.743	0.99264	0.94978-1.03743	0.852	0.99626	0.95791-1.03615	0.00012	0.98118	0.511	101.633	102	0.49163	101.632	101	0.46363
UKB_AAA	GCST90200045	103	0.593	0.99467	0.97545-1.0143	0.519	0.99502	0.98004-1.01023	0.168	0.9926	0.98217-1.00314	0.939	1.0016	0.96159-1.04328	0.87	1.0031	0.96668-1.04089	-0.00123	0.80395	0.825	87.3933	102	0.8482	87.3314	101	0.83183
FinnGen_AAA	GCST90199850	146	0.722	1.00798	0.96486-1.0530	0.435	1.01873	0.97237-1.06731	0.168	1.01722	0.99284-1.04220	0.503	1.03138	0.94234-1.12883	0.607	1.0138	0.96229-1.06806	0.00186	0.62381	0.89	124.734	145	0.88702	124.493	144	0.87822
FinnGen_AAA	GCST90200531	146	0.709	1.00736	0.96936-1.0469	0.37	1.01899	0.97792-1.06178	0.174	1.01488	0.99348-1.03674	0.82	0.99031	0.91091-1.07663	0.679	1.01062	0.96141-1.06234	0.00152	0.64946	0.982	111.563	145	0.98208	111.356	144	0.9799
UKB_AAA	GCST90200042	103	0.884	0.99852	0.97887-1.0186	0.638	0.99633	0.98117-1.01173	0.179	0.99268	0.98209-1.00338	0.991	1.00024	0.95785-1.04451	0.958	1.00105	0.96265-1.04099	-0.00347	0.49278	0.289	110.266	102	0.27086	109.751	101	0.25933
UKB_AAA	GCST90200711	103	0.49	1.00711	0.98711-1.0275	0.413	1.00631	0.99126-1.02159	0.18	1.00742	0.99659-1.01836	0.732	1.00741	0.96582-1.05079	0.837	1.00403	0.96650-1.04301	0.00018	0.97196	0.294	108.606	102	0.30877	108.605	101	0.28473
UKB_AAA	GCST90200721	104	0.574	1.00778	0.98100-1.0353	0.562	0.9939	0.97358-1.01465	0.183	0.99012	0.97576-1.00470	0.254	1.03777	0.97402-1.10568	0.236	1.03471	0.97826-1.09442	-0.01033	0.12983	0.333	108.603	103	0.33369	106.175	102	0.36883
UKB_AAA	GCST90200478	103	0.263	1.01235	0.99094-1.0342	0.129	1.01262	0.99637-1.02914	0.188	1.00781	0.99622-1.01953	0.664	0.9904	0.94832-1.03435	0.258	1.02487	0.98242-1.06914	-0.00266	0.62489	0.992	73.3632	102	0.98549	73.1226	101	0.98341
UKB_AAA	GCST90200374	103	0.521	1.00698	0.98589-1.0285	0.107	0.98677	0.97092-1.00287	0.192	0.99235	0.98095-1.00388	0.368	0.97969	0.93706-1.02426	0.345	0.97969	0.93905-1.02210	-0.00866	0.10992	0.324	107.756	102	0.32919	105.051	101	0.37143
FinnGen_AAA	GCST90199936	146	0.595	1.01253	0.96716-1.0600	0.968	1.00081	0.96250-1.04063	0.227	0.98445	0.95972-1.00981	0.781	0.98556	0.88979-1.09163	0.669	1.01245	0.95678-1.07135	-0.00572	0.15125	0.124	164.766	145	0.12496	162.418	144	0.13982
UKB_AAA	GCST90199632	103	0.958	1.00058	0.97957-1.0220	0.824	0.99809	0.98149-1.01498	0.25	1.00677	0.99527-1.01839	0.163	0.96805	0.92517-1.01291	0.206	0.96887	0.92281-1.01724	0.00364	0.4995	0.537	100.467	102	0.52435	100.008	101	0.50919
FinnGen_AAA	GCST90200190	146	0.725	1.00682	0.96946-1.0456	0.88	1.00318	0.96280-1.04525	0.253	1.01227	0.99130-1.03369	0.581	0.97932	0.90940-1.05460	0.907	1.00248	0.96178-1.04489	0.0011	0.73692	0.308	153.392	145	0.30065	153.271	144	0.28296
FinnGen_AAA	GCST90199682	146	0.238	1.02291	0.98527-1.0620	0.046	1.03295	1.00053-1.06642	0.262	1.01196	0.99116-1.03321	0.32	1.04215	0.96097-1.13019	0.068	1.04642	0.99706-1.09822	-0.0022	0.5002	0.409	147.002	145	0.43797	146.537	144	0.42549
FinnGen_AAA	GCST90200393	146	0.141	0.9726	0.93745-1.0091	0.116	0.9753	0.94535-1.00620	0.264	0.98841	0.96840-1.00882	0.836	0.99085	0.90862-1.08052	0.262	0.96905	0.91745-1.02354	0.0033	0.30374	0.575	140.681	145	0.58586	139.616	144	0.58769
UKB_AAA	GCST90200842	103	0.499	0.99315	0.97363-1.0131	0.624	0.99612	0.98077-1.01171	0.292	0.99424	0.98362-1.00498	0.267	0.97631	0.93606-1.01829	0.283	0.97708	0.93676-1.01914	0.00065	0.89712	0.861	87.6227	102	0.84398	87.6059	101	0.82643
FinnGen_AAA	GCST90199784	146	0.702	1.00787	0.96830-1.0491	0.699	1.00882	0.96489-1.05475	0.299	1.01184	0.98963-1.03454	0.703	0.98461	0.90930-1.06617	0.905	1.00298	0.95526-1.05307	0.00081	0.81716	0.302	153.728	145	0.29407	153.67	144	0.27538
UKB_AAA	GCST90200190	103	0.569	0.99414	0.97432-1.0144	0.223	0.99061	0.97570-1.00574	0.302	0.99431	0.98359-1.00514	0.628	0.98901	0.94592-1.03407	0.761	0.99369	0.95415-1.03486	0.0001	0.98456	0.224	112.373	102	0.22684	112.372	101	0.20655
UKB_AAA	GCST90200623	103	0.842	0.99799	0.97846-1.0179	0.357	0.99289	0.97792-1.00808	0.353	0.99494	0.98435-1.00564	0.682	0.99146	0.95170-1.03288	0.584	0.98847	0.94847-1.03017	-0.00181	0.71899	0.685	95.1071	102	0.67255	94.9769	101	0.65001
FinnGen_AAA	GCST90199984	146	0.195	1.03256	0.98393-1.0836	0.107	1.03692	0.99214-1.08371	0.357	1.01267	0.98588-1.04019	0.457	1.04265	0.93416-1.16374	0.14	1.04838	0.98490-1.11596	-0.00398	0.34354	0.42	148.25	145	0.40961	147.326	144	0.4076
FinnGen_AAA	GCST90200387	146	0.757	0.99404	0.95726-1.0322	0.903	1.00257	0.96203-1.04482	0.367	0.9904	0.96988-1.01136	0.931	0.9966	0.92314-1.07591	0.88	1.00369	0.95700-1.05266	-0.00075	0.81896	0.915	121.714	145	0.92052	121.662	144	0.91172
UKB_AAA	GCST90199644	103	0.439	1.00851	0.98716-1.0303	0.53	1.00513	0.98919-1.02133	0.399	1.00498	0.99345-1.01663	0.942	0.99842	0.95707-1.04154	0.977	0.99943	0.96127-1.03911	-0.00208	0.70288	0.131	118.029	102	0.13254	117.858	101	0.12055
UKB_AAA	GCST90200855	103	0.262	0.98898	0.97013-1.0082	0.171	0.98963	0.97496-1.00452	0.404	0.99557	0.98526-1.00600	0.374	0.98182	0.94303-1.02219	0.357	0.98182	0.94442-1.02070	0.00392	0.4231	0.771	90.6661	102	0.78167	90.0192	101	0.77492
FinnGen_AAA	GCST90200842	146	0.759	0.99339	0.95229-1.0363	0.618	0.9887	0.94547-1.03390	0.411	0.99023	0.96731-1.01369	0.798	0.98895	0.90827-1.07678	0.526	0.98635	0.94543-1.02903	-0.00065	0.85892	0.041	177.674	145	0.03367	177.635	144	0.02976
UKB_AAA	GCST90200480	103	0.211	1.01298	0.99283-1.0335	0.353	0.99274	0.97761-1.00812	0.444	0.99576	0.98498-1.00666	0.627	0.99012	0.95134-1.03047	0.674	0.99192	0.95519-1.03006	-0.01015	0.04932	0.512	101.094	102	0.50673	97.1349	101	0.59034
UKB_AAA	GCST90199636	103	0.962	0.99954	0.98093-1.0185	0.637	0.99657	0.98245-1.01090	0.448	1.00395	0.99379-1.01421	0.509	0.98642	0.94728-1.02717	0.495	0.98709	0.95107-1.02448	0.0026	0.58657	0.595	98.0781	102	0.59147	97.7805	101	0.57218
FinnGen_AAA	GCST90200623	146	0.33	0.98091	0.94375-1.0195	0.381	0.9837	0.94818-1.02054	0.46	1.00817	0.98666-1.03016	0.83	0.99089	0.91178-1.07686	0.415	0.98134	0.93797-1.02671	0.00561	0.09645	0.333	151.637	145	0.33615	148.745	144	0.37607
FinnGen_AAA	GCST90200726	146	0.293	1.02255	0.98103-1.0658	0.427	0.98492	0.94866-1.02257	0.461	1.00868	0.98575-1.03214	0.949	0.99724	0.91616-1.08550	0.529	0.98523	0.94075-1.03181	-0.00279	0.43866	0.037	177.41	145	0.0347	176.67	144	0.03327
FinnGen_AAA	GCST90200351	146	0.01	1.05036	1.01255-1.0896	0.041	1.03494	1.00143-1.06956	0.48	1.00752	0.98680-1.02868	0.363	1.03949	0.95654-1.12964	0.079	1.0427	0.99546-1.09218	-0.00852	0.0083	0.345	151.132	145	0.34674	143.968	144	0.48508
FinnGen_AAA	GCST90199830	146	0.745	0.9936	0.95597-1.0327	0.877	1.00266	0.96946-1.03699	0.49	0.99249	0.97149-1.01395	0.119	0.93863	0.86729-1.01584	0.515	1.01576	0.96921-1.06455	-0.00023	0.94603	0.348	151.781	145	0.33317	151.776	144	0.3123
UKB_AAA	GCST90199936	103	0.438	1.00887	0.98669-1.0316	0.398	1.00768	0.98996-1.02572	0.499	1.00416	0.99213-1.01633	0.504	1.01575	0.97043-1.06318	0.559	1.01409	0.96774-1.06266	-0.00277	0.62442	0.862	87.0456	102	0.85446	86.8045	101	0.84191
UKB_AAA	GCST90199760	103	0.544	1.00625	0.98625-1.0267	0.666	0.99669	0.98180-1.01180	0.51	0.99636	0.98559-1.00724	0.985	1.00042	0.95818-1.04452	0.947	1.0013	0.96397-1.04007	-0.00584	0.25404	0.635	97.071	102	0.61941	95.7551	101	0.62873
FinnGen_AAA	GCST90199636	146	0.19	1.02453	0.98823-1.0622	0.498	1.01263	0.97654-1.05004	0.514	1.0067	0.98672-1.02709	0.985	0.99928	0.92708-1.07710	0.794	1.00589	0.96251-1.05123	-0.00359	0.25319	0.859	127.295	145	0.85216	125.978	144	0.8577
UKB_AAA	GCST90199622	103	0.66	0.99532	0.97484-1.0162	0.208	0.98971	0.97390-1.00577	0.518	1.00372	0.99248-1.01508	0.326	0.97701	0.93295-1.02316	0.269	0.97773	0.93970-1.01731	0.00496	0.34881	0.84	87.8712	102	0.83933	86.9852	101	0.83849
FinnGen_AAA	GCST90200711	146	0.219	0.9762	0.93955-1.0143	0.559	1.01106	0.97448-1.04901	0.536	0.99331	0.97242-1.01466	0.897	0.99436	0.91280-1.08320	0.634	1.01183	0.96407-1.06195	0.00356	0.28618	0.294	153.733	145	0.29397	152.519	144	0.29753
FinnGen_AAA	GCST90200370	146	0.969	0.99927	0.96365-1.0362	0.157	1.02651	0.98996-1.06441	0.554	1.0061	0.98602-1.02659	0.202	0.94432	0.86507-1.03083	0.364	1.02337	0.97369-1.07560	0.00139	0.65885	0.968	114.143	145	0.97253	113.947	144	0.96937
UKB_AAA	GCST90199947	103	0.759	0.99718	0.97935-1.0153	0.869	1.0012	0.98702-1.01558	0.561	0.99711	0.98742-1.00689	0.714	1.00717	0.96953-1.04627	0.818	1.00445	0.96734-1.04299	-4e-05	0.99313	0.936	81.4604	102	0.93323	81.4603	101	0.92326
UKB_AAA	GCST90200896	103	0.047	0.97433	0.94995-0.9993	0.52	1.00638	0.98706-1.02607	0.563	0.99596	0.98241-1.00970	0.492	1.01978	0.96451-1.07823	0.514	1.01752	0.96599-1.07180	0.01295	0.04627	0.62	97.2953	102	0.61322	93.2241	101	0.69658
FinnGen_AAA	GCST90200478	146	0.306	1.02216	0.98029-1.0658	0.536	1.01126	0.97601-1.04779	0.575	1.00666	0.98358-1.03029	0.578	0.97384	0.88708-1.06908	0.164	1.03887	0.98484-1.09586	-0.00312	0.39084	0.353	150.17	145	0.36726	149.401	144	0.36183
UKB_AAA	GCST90200797	103	0.46	0.99188	0.97074-1.0135	0.314	0.9918	0.97600-1.00784	0.575	0.99668	0.98517-1.00833	0.557	0.98759	0.94736-1.02953	0.538	0.98665	0.94543-1.02967	0.00285	0.60248	0.266	110.568	102	0.26427	110.27	101	0.2483
FinnGen_AAA	GCST90200721	146	0.659	1.01163	0.96112-1.0648	0.857	1.00498	0.95199-1.06093	0.591	1.00776	0.97972-1.03660	0.582	0.97049	0.87242-1.07959	0.961	0.99837	0.93534-1.06565	-0.00078	0.86051	0.499	145.226	145	0.47909	145.195	144	0.4564
FinnGen_AAA	GCST90200654	146	0.348	1.02584	0.97278-1.0818	0.375	1.02622	0.96920-1.08659	0.595	1.00812	0.97854-1.03859	0.434	1.04452	0.93684-1.16458	0.323	1.03042	0.97115-1.09330	-0.00361	0.43833	0.499	145.74	145	0.46712	145.131	144	0.45789
UKB_AAA	GCST90200133	103	0.378	1.0125	0.98505-1.0407	0.891	1.00136	0.98205-1.02105	0.61	1.00387	0.98907-1.01889	0.596	0.98554	0.93410-1.03982	0.651	0.98777	0.93666-1.04166	-0.00507	0.46955	0.115	119.547	102	0.11305	118.927	101	0.10751
UKB_AAA	GCST90200092	104	0.891	1.00203	0.97337-1.0315	0.458	1.00843	0.98632-1.03105	0.61	0.99595	0.98054-1.01161	0.564	1.01692	0.96076-1.07635	0.551	1.01692	0.96252-1.07438	-0.00357	0.62645	0.16	117.507	103	0.15557	117.233	102	0.14371
FinnGen_AAA	GCST90200063	146	0.362	1.0201	0.97749-1.0646	0.649	1.00911	0.97045-1.04932	0.613	1.00612	0.98260-1.03021	0.24	1.04476	0.97148-1.12357	0.529	1.01443	0.97033-1.06054	-0.00282	0.44736	<0.001	198.521	145	0.00211	197.724	144	0.002
FinnGen_AAA	GCST90199831	146	0.979	0.99936	0.95357-1.0473	0.872	1.00336	0.96321-1.04518	0.614	1.00671	0.98091-1.03320	0.829	0.99133	0.91617-1.07265	0.995	0.99984	0.95274-1.04927	0.0015	0.71308	<0.001	224.403	145	3e-05	224.191	144	2e-05
UKB_AAA	GCST90200989	103	0.995	1.00006	0.98063-1.0199	0.284	1.00849	0.99302-1.02420	0.621	1.00268	0.99209-1.01339	0.24	1.02351	0.98484-1.06370	0.179	1.02671	0.98824-1.06666	0.00155	0.75647	0.604	97.3925	102	0.61053	97.2958	101	0.58582
FinnGen_AAA	GCST90200684	146	0.401	0.98352	0.94623-1.0223	0.963	1.00101	0.95906-1.04479	0.633	0.99478	0.97360-1.01641	0.658	1.01933	0.93676-1.10917	0.769	1.00688	0.96187-1.05399	0.00233	0.48816	0.665	137.392	145	0.6611	136.909	144	0.65004
FinnGen_AAA	GCST90200374	146	0.265	1.02296	0.98308-1.0645	0.369	1.01866	0.97838-1.06059	0.647	1.00519	0.98318-1.02769	0.788	1.01174	0.92932-1.10147	0.464	1.01935	0.96850-1.07287	-0.00359	0.30017	0.852	127.104	145	0.85497	126.022	144	0.85706
UKB_AAA	GCST90200615	103	0.742	1.0036	0.98240-1.0253	0.686	0.99669	0.98077-1.01286	0.648	0.99732	0.98589-1.00888	0.906	1.00259	0.96033-1.04672	0.997	1.00008	0.95834-1.04364	-0.00371	0.49474	0.222	113.404	102	0.20703	112.879	101	0.19721
FinnGen_AAA	GCST90200997	146	0.624	0.99031	0.95261-1.0295	0.038	0.96387	0.93097-0.99794	0.656	0.99513	0.97396-1.01676	0.201	0.94441	0.86542-1.03062	0.09	0.95642	0.90871-1.00665	0.00099	0.76834	0.224	158.331	145	0.21217	158.235	144	0.1972
UKB_AAA	GCST90200063	103	0.9	0.99876	0.97968-1.0182	0.272	1.00845	0.99341-1.02373	0.672	1.00225	0.99189-1.01272	0.187	1.02755	0.98717-1.06959	0.157	1.0267	0.99020-1.06454	0.00206	0.67416	0.408	104.822	102	0.40423	104.638	101	0.38218
FinnGen_AAA	GCST90200797	146	0.832	0.99556	0.95559-1.0372	0.528	1.01323	0.97274-1.05540	0.673	1.0049	0.98237-1.02794	0.37	0.95894	0.87515-1.05075	0.883	1.00371	0.95565-1.05418	0.00191	0.59227	0.312	153.73	145	0.29402	153.423	144	0.28006
UKB_AAA	GCST90199784	103	0.288	0.98891	0.96888-1.0094	0.232	1.0098	0.99377-1.02609	0.679	1.00236	0.99124-1.01360	0.458	1.01757	0.97200-1.06528	0.426	1.01849	0.97378-1.06526	0.00798	0.12716	0.371	106.039	102	0.37234	103.612	101	0.40942
FinnGen_AAA	GCST90200848	146	0.214	1.02517	0.98589-1.0660	0.175	1.02531	0.98895-1.06301	0.692	0.99559	0.97406-1.01760	0.428	1.03692	0.94818-1.13396	0.127	1.03692	0.99000-1.08606	-0.00599	0.0794	0.17	161.548	145	0.16457	158.121	144	0.19896
FinnGen_AAA	GCST90200133	146	0.667	1.01129	0.96096-1.0642	0.403	1.01803	0.97624-1.06160	0.707	1.00547	0.97728-1.03446	0.229	0.93497	0.83835-1.04273	0.144	1.05286	0.98287-1.12784	-0.00119	0.78972	0.169	160.401	145	0.18062	160.321	144	0.16688
UKB_AAA	GCST90200247	103	0.704	1.00412	0.98314-1.0255	0.853	0.99846	0.98235-1.01484	0.71	0.99783	0.98651-1.00929	0.76	1.00712	0.96244-1.05386	0.68	1.00972	0.96450-1.05706	-0.00371	0.4899	0.569	99.3641	102	0.55542	98.8839	101	0.54099
UKB_AAA	GCST90200249	103	0.777	1.00287	0.98320-1.0229	0.524	0.9953	0.98096-1.00985	0.712	0.99799	0.98739-1.00871	0.294	0.97681	0.93516-1.02032	0.297	0.97986	0.94328-1.01787	-0.00288	0.56772	0.247	111.547	102	0.24353	111.185	101	0.22952
FinnGen_AAA	GCST90199760	146	0.477	1.01541	0.97358-1.0590	0.893	1.00297	0.96054-1.04728	0.725	0.99581	0.97283-1.01933	0.704	1.01687	0.93290-1.10840	0.824	1.00557	0.95764-1.05590	-0.00398	0.27694	0.075	171.674	145	0.0645	170.266	144	0.06664
UKB_AAA	GCST90199717	103	0.519	1.00622	0.98752-1.0253	0.812	1.00178	0.98725-1.01652	0.729	1.0018	0.99168-1.01202	0.595	1.01115	0.97076-1.05321	0.471	1.0149	0.97503-1.05640	-0.0026	0.58539	0.526	100.507	102	0.52325	100.207	101	0.50358
FinnGen_AAA	GCST90200763	146	0.37	0.98375	0.94926-1.0195	0.321	0.98258	0.94909-1.01726	0.731	1.00348	0.98381-1.02353	0.588	1.02135	0.94640-1.10224	0.599	0.98697	0.94000-1.03629	0.00406	0.19211	0.628	139.46	145	0.61418	137.743	144	0.63109
UKB_AAA	GCST90200337	103	0.645	1.00513	0.98352-1.0272	0.219	0.98961	0.97324-1.00625	0.746	0.99807	0.98643-1.00984	0.174	0.97076	0.93034-1.01292	0.214	0.97375	0.93401-1.01518	-0.00416	0.45138	0.091	122.067	102	0.08564	121.38	101	0.08171
FinnGen_AAA	GCST90200936	146	0.82	0.99569	0.95939-1.0334	0.52	0.98724	0.94937-1.02662	0.75	0.99665	0.97631-1.01741	0.943	1.00284	0.92806-1.08364	0.934	0.99798	0.95145-1.04679	0.0002	0.95126	0.882	126.941	145	0.85733	126.938	144	0.84337
UKB_AAA	GCST90200936	103	0.834	0.99793	0.97884-1.0174	0.515	0.99508	0.98040-1.00997	0.76	1.00163	0.99121-1.01215	0.755	0.99395	0.95678-1.03255	0.72	0.99326	0.95727-1.03060	0.00219	0.65632	0.965	77.1092	102	0.96864	76.91	101	0.96441
FinnGen_AAA	GCST90200042	146	0.425	0.98519	0.94981-1.0219	0.769	0.994	0.95483-1.03479	0.774	0.99702	0.97698-1.01748	0.175	0.9488	0.87981-1.02320	0.361	0.9793	0.93642-1.02414	0.00244	0.44263	0.544	142.301	145	0.54787	141.708	144	0.53841
UKB_AAA	GCST90199682	103	0.358	1.00996	0.98893-1.0314	0.883	0.99882	0.98324-1.01465	0.774	0.99833	0.98700-1.00980	0.921	1.00224	0.95895-1.04748	0.846	1.004	0.96432-1.04531	-0.00684	0.20255	0.105	121.366	102	0.09267	119.421	101	0.10187
UKB_AAA	GCST90200990	103	0.739	0.99631	0.97495-1.0181	0.901	0.99894	0.98240-1.01575	0.778	1.00169	0.99003-1.01348	0.771	0.99296	0.94684-1.04132	0.914	0.99769	0.95688-1.04023	0.00318	0.56405	0.436	103.469	102	0.44078	103.127	101	0.42252
FinnGen_AAA	GCST90199717	146	0.13	1.02833	0.99202-1.0660	0.188	1.02174	0.98954-1.05499	0.778	1.00288	0.98303-1.02314	0.605	1.01972	0.94707-1.09794	0.153	1.03652	0.98703-1.08850	-0.00513	0.10231	0.528	142.552	145	0.54196	139.848	144	0.58224
FinnGen_AAA	GCST90200249	146	0.896	0.99745	0.96022-1.0361	0.619	0.99021	0.95252-1.02939	0.794	1.00281	0.98191-1.02415	0.985	1.00081	0.91918-1.08968	0.561	0.98726	0.94556-1.03079	0.00109	0.74065	0.217	158.685	145	0.20654	158.563	144	0.19221
UKB_AAA	GCST90200654	104	0.858	1.00271	0.97345-1.0328	0.211	1.01401	0.99216-1.03634	0.795	1.00211	0.98629-1.01818	0.154	1.05048	0.98223-1.12347	0.113	1.0542	0.98822-1.12459	-0.00035	0.96267	0.168	115.788	103	0.18338	115.785	102	0.16578
FinnGen_AAA	GCST90200206	146	0.144	0.97015	0.93174-1.0102	0.63	0.99109	0.95563-1.02787	0.801	0.99711	0.97499-1.01974	0.832	1.01065	0.91636-1.11466	0.512	0.98089	0.92599-1.03904	0.0056	0.11204	0.619	139.169	145	0.62088	136.613	144	0.65671
FinnGen_AAA	GCST90200787	146	0.786	1.00518	0.96839-1.0434	0.611	0.98999	0.95231-1.02915	0.802	1.00265	0.98212-1.02362	0.441	0.9682	0.89194-1.05098	0.558	0.98605	0.94091-1.03336	-0.00051	0.87374	0.757	133.446	145	0.74471	133.421	144	0.72568
UKB_AAA	GCST90200311	103	0.154	1.01428	0.99485-1.0341	0.848	1.00143	0.98685-1.01623	0.835	1.00112	0.99063-1.01172	0.77	0.99349	0.95106-1.03781	0.699	0.99263	0.95618-1.03048	-0.00771	0.11874	0.27	111.424	102	0.24608	108.758	101	0.28126
UKB_AAA	GCST90199850	103	0.454	1.00872	0.98615-1.0318	0.326	0.99117	0.97377-1.00888	0.835	0.9987	0.98654-1.01102	0.4	0.97879	0.93134-1.02865	0.408	0.98034	0.93549-1.02735	-0.00591	0.30618	0.492	101.018	102	0.50888	99.9598	101	0.51056
UKB_AAA	GCST90200264	103	0.781	0.99709	0.97687-1.0177	0.711	0.99709	0.98179-1.01262	0.85	0.99893	0.98797-1.01002	0.846	0.99579	0.95436-1.03902	0.829	0.99579	0.95847-1.03456	0.00109	0.83415	0.201	114.542	102	0.18653	114.492	101	0.16941
UKB_AAA	GCST90200097	103	0.425	1.00969	0.98613-1.0338	0.355	1.00878	0.99026-1.02764	0.852	0.99878	0.98609-1.01164	0.466	1.01889	0.96907-1.07127	0.503	1.018	0.96635-1.07240	-0.00642	0.28599	0.354	105.967	102	0.37419	104.773	101	0.37864
UKB_AAA	GCST90199830	103	0.086	1.01748	0.99773-1.0376	0.956	0.99957	0.98436-1.01502	0.858	1.00097	0.99040-1.01165	0.854	0.99622	0.95688-1.03719	0.835	0.99555	0.95477-1.03807	-0.00967	0.0544	0.842	88.5222	102	0.82677	84.7342	101	0.87795
UKB_AAA	GCST90200763	103	0.706	1.00387	0.98399-1.0242	0.938	0.9994	0.98445-1.01458	0.859	0.99903	0.98831-1.00986	0.521	0.98685	0.94788-1.02742	0.564	0.98911	0.95305-1.02652	-0.00286	0.57431	0.134	117.995	102	0.13301	117.625	101	0.12355
UKB_AAA	GCST90200126	103	0.972	0.99969	0.98282-1.0169	0.423	1.0054	0.99223-1.01874	0.878	0.99928	0.99012-1.00852	0.299	1.0193	0.98339-1.05652	0.326	1.01854	0.98207-1.05636	-0.00025	0.95464	0.807	90.7454	102	0.7799	90.7421	101	0.75816
FinnGen_AAA	GCST90199644	146	0.857	0.99622	0.95621-1.0379	0.981	1.00051	0.95906-1.04375	0.878	0.99822	0.97586-1.02110	0.594	1.02189	0.94379-1.10644	0.817	1.00527	0.96161-1.05092	0.00041	0.90849	0.122	166.35	145	0.10829	166.335	144	0.09811
UKB_AAA	GCST90200726	103	0.005	1.02905	1.00919-1.0493	0.676	1.00323	0.98817-1.01853	0.88	1.00081	0.99031-1.01142	0.444	1.01607	0.97555-1.05828	0.454	1.01607	0.97465-1.05926	-0.01644	0.00122	0.842	86.8929	102	0.85716	75.8179	101	0.97109
FinnGen_AAA	GCST90200896	146	0.122	1.03914	0.99004-1.0907	0.437	1.02009	0.97015-1.07259	0.89	0.9981	0.97150-1.02543	0.761	0.9848	0.89231-1.08687	0.701	1.0117	0.95348-1.07347	-0.00826	0.05136	0.466	145.673	145	0.46868	141.812	144	0.53594
FinnGen_AAA	GCST90200311	146	0.829	1.004	0.96847-1.0408	0.347	1.01747	0.98136-1.05492	0.901	0.99873	0.97901-1.01885	0.86	0.99255	0.91337-1.07859	0.753	1.00698	0.96441-1.05143	-0.00107	0.73156	0.471	146.123	145	0.45822	146.003	144	0.43772
UKB_AAA	GCST90200351	103	0.646	1.0045	0.98550-1.0239	0.477	1.00529	0.99079-1.02000	0.902	1.00065	0.99037-1.01104	0.472	1.01476	0.97521-1.05591	0.413	1.01476	0.97993-1.05082	-0.00227	0.64033	0.938	81.4427	102	0.93341	81.223	101	0.926
FinnGen_AAA	GCST90200337	146	0.908	0.99775	0.96039-1.0366	0.746	1.00649	0.96790-1.04663	0.906	0.99873	0.97783-1.02008	0.867	0.99343	0.91963-1.07316	0.949	0.99846	0.95228-1.04687	0.0002	0.95172	0.935	119.814	145	0.93758	119.81	144	0.92979
FinnGen_AAA	GCST90200126	146	0.524	0.98898	0.95592-1.0232	0.916	1.0019	0.96707-1.03797	0.914	0.99896	0.98031-1.01796	0.558	0.9792	0.91292-1.05030	0.859	0.99634	0.95688-1.03742	0.00205	0.48757	0.272	156.015	145	0.25142	155.492	144	0.24229
FinnGen_AAA	GCST90200445	146	0.023	0.95238	0.91346-0.9930	0.734	1.00779	0.96360-1.05401	0.921	1.0012	0.97773-1.02524	0.395	1.0414	0.94879-1.14304	0.61	1.01353	0.96269-1.06707	0.01023	0.00541	0.011	184.846	145	0.01416	175.142	144	0.03955
UKB_AAA	GCST90200984	103	0.967	0.99956	0.97932-1.0202	0.704	1.00315	0.98700-1.01956	0.921	0.99944	0.98842-1.01057	0.372	1.02114	0.97548-1.06894	0.3	1.02392	0.97940-1.07045	-8e-05	0.9885	0.836	88.0648	102	0.83565	88.0646	101	0.81719
FinnGen_AAA	GCST90200989	146	0.562	0.98888	0.95224-1.0269	0.822	0.99601	0.96187-1.03135	0.929	1.00095	0.98020-1.02215	0.747	1.01301	0.93660-1.09565	0.736	0.99213	0.94772-1.03863	0.00248	0.45009	0.616	139.5	145	0.61328	138.926	144	0.60378
FinnGen_AAA	GCST90200480	146	0.71	0.99261	0.95458-1.0322	0.643	0.99033	0.95049-1.03185	0.947	0.99926	0.97783-1.02116	0.64	0.98077	0.90434-1.06367	0.666	0.98921	0.94172-1.03908	0.00137	0.68734	0.41	148.094	145	0.41314	147.927	144	0.39415
FinnGen_AAA	GCST90199632	146	0.229	1.0256	0.98441-1.0685	0.375	1.01644	0.98048-1.05371	0.951	0.99928	0.97687-1.02221	0.928	0.99544	0.90167-1.09896	0.249	1.03106	0.97903-1.08586	-0.0053	0.13776	0.721	134.617	145	0.7209	132.389	144	0.74662
UKB_AAA	GCST90200445	103	0.9	0.99872	0.97905-1.0188	0.714	1.00276	0.98805-1.01770	0.952	1.00033	0.98967-1.01111	0.472	1.01514	0.97458-1.05738	0.557	1.01234	0.97183-1.05454	0.00095	0.85057	0.466	103.037	102	0.45263	103.001	101	0.42595
FinnGen_AAA	GCST90200045	146	0.626	1.01269	0.96270-1.0653	0.893	0.99712	0.95614-1.03986	0.958	1.00075	0.97307-1.02922	0.277	0.95575	0.88121-1.03660	0.358	0.97783	0.93232-1.02556	-0.00243	0.58181	<0.001	263.351	145	0	262.795	144	0
FinnGen_AAA	GCST90199947	146	0.491	0.98694	0.95084-1.0244	0.724	1.00652	0.97088-1.04347	0.958	1.00055	0.98007-1.02146	0.971	1.00137	0.93017-1.07803	0.681	1.00876	0.96771-1.05155	0.0028	0.3879	0.079	167.38	145	0.09839	166.513	144	0.09647
FinnGen_AAA	GCST90200097	146	0.457	0.98278	0.93896-1.0286	0.542	0.98536	0.93969-1.03325	0.96	1.00064	0.97580-1.02612	0.693	0.9808	0.89096-1.07970	0.487	0.9808	0.92869-1.03583	0.00366	0.35497	0.398	148.618	145	0.40138	147.734	144	0.39845
FinnGen_AAA	GCST90200264	146	0.504	0.98701	0.94999-1.0255	0.876	0.99728	0.96380-1.03192	0.978	0.9997	0.97873-1.02113	0.561	1.02248	0.94873-1.10196	0.698	0.99116	0.94769-1.03662	0.00261	0.43222	0.259	154.481	145	0.27961	153.819	144	0.27259
UKB_AAA	GCST90200387	103	0.965	1.00053	0.97718-1.0244	0.715	1.00291	0.98736-1.01872	0.989	0.99991	0.98728-1.01270	0.577	1.01257	0.96918-1.05790	0.682	1.00924	0.96588-1.05454	-0.00036	0.95158	0.001	146.139	102	0.00275	146.134	101	0.00224

## Sheet: S10.3
The resluts of reverse MR analysis between immune factors and the risk of AAA in two databases.
exposure.id	outcome.id	nsnp	MR-Egger			Weighted median			Inverse variance weighted			Simple mode			Weighted mode			MR-Egger intercept		MR-PRESSO global	MR-IVW			MR-Egeer
			p_value	OR	95% OR	p_value	OR	95% OR	p_value	OR	95% OR	p_value	OR	95% OR	p_value	OR	95% OR	egger intercept	p_value	p_value	Q	Q_df	Q_pval	Q	Q_df	Q_pval
FinnGen_AAA	GCST90274818	154	0.125	0.97455	0.94314-1.0070	0.624	0.99289	0.96499-1.02160	0.602	0.99558	0.97915-1.01229	0.92	0.99675	0.93521-1.06233	0.647	0.98934	0.94510-1.03564	0.00398	0.14087	0.395	156.549	153	0.4054	154.324	152	0.43218
UKB_AAA	GCST90274818	111	0.904	1.00093	0.98599-1.0161	0.52	1.00376	0.99236-1.01529	0.674	1.00173	0.99370-1.00982	0.406	1.01461	0.98059-1.04981	0.335	1.01585	0.98399-1.04874	0.00045	0.90232	0.317	117.06	110	0.3047	117.044	109	0.28202
FinnGen_AAA	GCST90274795	154	0.977	0.99951	0.96735-1.0327	0.444	1.01148	0.98236-1.04145	0.262	1.00954	0.99292-1.02644	0.033	1.07822	1.00679-1.15471	0.978	1.00063	0.95765-1.04553	0.00186	0.48851	0.906	130.104	153	0.91018	129.622	152	0.90553
UKB_AAA	GCST90274795	111	0.435	0.99363	0.97787-1.0097	0.811	1.0014	0.99000-1.01293	0.878	0.99933	0.99078-1.00795	0.762	1.00474	0.97450-1.03591	0.673	1.00637	0.97722-1.03639	0.00327	0.40788	0.085	130.827	110	0.08558	130.003	109	0.08307

## Sheet: S10.4
The resluts of reverse MR analysis between gut microbiota phenotypes and the risk of AAA in two databases.
exposure.id	outcome.id	nsnp	MR-Egger			Weighted median			Inverse variance weighted			Simple mode			Weighted mode			MR-Egger intercept		MR-PRESSO global	MR-IVW			MR-Egeer
			p_value	OR	95% OR	p_value	OR	95% OR	p_value	OR	95% OR	p_value	OR	95% OR	p_value	OR	95% OR	egger intercept	p_value	p_value	Q	Q_df	Q_pval	Q	Q_df	Q_pval
FinnGen_AAA	GCST90027679	99	0.11	0.89245	0.77730-1.0247	0.032	0.94591	0.89908-0.99519	0.013	0.95483	0.92081-0.99011	0.105	0.88667	0.76777-1.02398	0.044	0.8754	0.77013-0.99504	0.00929	0.32295	0.302	105.824	98	0.27694	104.758	97	0.27748
UKB_AAA	GCST90027719	47	0.839	0.99307	0.92911-1.0614	0.263	0.98543	0.96040-1.01111	0.015	0.97847	0.96142-0.99582	0.824	0.99353	0.93867-1.05159	0.821	0.99353	0.93960-1.05055	-0.00531	0.65334	0.518	45.5722	46	0.49007	45.3662	45	0.45668
UKB_AAA	GCST90027783	47	0.066	0.86779	0.74874-1.0058	0.081	0.95151	0.89980-1.00618	0.015	0.95234	0.91554-0.99063	0.473	0.95405	0.83990-1.08373	0.464	0.95405	0.84217-1.08080	0.03342	0.20655	0.662	41.4703	46	0.66223	39.8278	45	0.69025
FinnGen_AAA	GCST90027699	99	0.499	0.9482	0.81309-1.1058	0.103	0.95317	0.89970-1.00982	0.019	0.95286	0.91506-0.99222	0.14	0.90495	0.79327-1.03236	0.229	0.92153	0.80733-1.05189	0.00067	0.94849	0.994	67.8674	98	0.99122	67.8632	97	0.98924
UKB_AAA	GCST90027589	46	0.417	0.9597	0.86978-1.0589	0.322	0.98184	0.94687-1.01810	0.019	0.9705	0.94654-0.99507	0.678	0.9846	0.91554-1.05887	0.873	0.99363	0.91941-1.07385	0.00395	0.81873	0.777	38.0016	45	0.76069	37.9484	44	0.72751
FinnGen_AAA	GCST90027536	85	0.094	1.14068	0.97953-1.3283	0.04	0.93854	0.88348-0.99704	0.02	0.95376	0.91656-0.99248	0.144	0.89688	0.77600-1.03658	0.184	0.91919	0.81248-1.03992	-0.02437	0.01944	0.414	86.5916	84	0.40158	80.9115	83	0.54443
UKB_AAA	GCST90027802	41	0.887	0.99492	0.92790-1.0668	0.286	0.98514	0.95842-1.01260	0.021	0.97756	0.95892-0.99656	0.885	0.99559	0.93794-1.05678	0.847	0.99477	0.94359-1.04872	-0.00645	0.60937	0.424	41.8361	40	0.39106	41.5534	39	0.36009
FinnGen_AAA	GCST90027685	98	0.492	1.07356	0.87742-1.3136	0.059	0.9293	0.86129-1.00267	0.022	0.94036	0.89223-0.99107	0.641	0.948	0.75788-1.18581	0.408	0.93105	0.78680-1.10175	-0.01813	0.18582	0.413	100.509	97	0.38335	98.6834	96	0.4052
FinnGen_AAA	GCST90027746	98	0.492	1.07359	0.87741-1.3136	0.064	0.92916	0.85974-1.00418	0.022	0.94034	0.89221-0.99107	0.578	0.94787	0.78550-1.14380	0.426	0.93092	0.78095-1.10969	-0.01814	0.18575	0.404	100.537	97	0.3826	98.7105	96	0.40446
FinnGen_AAA	GCST90027772	99	0.558	0.9552	0.81995-1.1127	0.17	0.95985	0.90533-1.01766	0.031	0.95677	0.91907-0.99602	0.931	0.99408	0.86900-1.13717	0.73	0.97856	0.86552-1.10636	0.00023	0.98254	0.983	70.4895	98	0.98373	70.489	97	0.9804
FinnGen_AAA	GCST90027605	98	0.452	1.06309	0.90686-1.2462	0.11	1.04963	0.98910-1.11387	0.045	1.04274	1.00092-1.08632	0.594	1.04023	0.90021-1.20203	0.526	1.04023	0.92112-1.17475	-0.00264	0.80566	0.402	99.6144	97	0.40756	99.5513	96	0.38164
FinnGen_AAA	GCST90027529	98	0.499	1.03996	0.92873-1.1645	0.063	1.04223	0.99779-1.08864	0.05	1.02972	1.00003-1.06029	0.356	1.05016	0.94704-1.16451	0.325	1.0454	0.95739-1.14150	-0.00135	0.8595	0.802	85.6842	97	0.78756	85.6527	96	0.76633
FinnGen_AAA	GCST90027474	69	0.171	1.15181	0.94306-1.4068	0.646	1.01703	0.94628-1.09307	0.053	1.05324	0.99924-1.11015	0.801	0.97675	0.81390-1.17219	0.902	0.9894	0.83606-1.17086	-0.01226	0.36657	0.18	78.417	68	0.18198	77.4615	67	0.17944
FinnGen_AAA	GCST90027496	99	0.952	1.00635	0.82103-1.2335	0.259	0.95665	0.88577-1.03320	0.075	0.95266	0.90316-1.00487	0.667	0.95806	0.78861-1.16392	0.827	0.97998	0.81754-1.17469	-0.00753	0.58555	0.746	88.7002	98	0.73843	88.4008	97	0.72186
FinnGen_AAA	GCST90027800	94	0.762	1.03297	0.83765-1.2738	0.44	0.97087	0.90064-1.04659	0.078	0.95557	0.90852-1.00507	0.545	1.06397	0.87114-1.29948	0.427	1.0766	0.89812-1.29055	-0.01049	0.45493	0.812	81.1421	93	0.8051	80.579	92	0.79669
UKB_AAA	GCST90027462	45	0.286	0.92032	0.79173-1.0698	0.191	0.96487	0.91447-1.01804	0.079	0.96661	0.93062-1.00399	0.082	0.89207	0.78656-1.01172	0.158	0.92259	0.82650-1.02985	0.01724	0.51258	0.923	31.7635	44	0.91572	31.3275	43	0.90678
FinnGen_AAA	GCST90027770	98	0.475	0.94177	0.79934-1.1096	0.771	0.99122	0.93405-1.05189	0.079	0.96279	0.92295-1.00435	0.777	0.97607	0.82594-1.15348	0.94	1.00573	0.86685-1.16686	0.00302	0.78537	0.362	101.082	97	0.36814	101.004	96	0.3435
UKB_AAA	GCST90027474	33	0.855	1.01084	0.90136-1.1336	0.102	0.96653	0.92792-1.00675	0.086	0.97426	0.94574-1.00365	0.371	0.96229	0.88565-1.04556	0.418	0.96415	0.88364-1.05199	-0.01338	0.51892	0.881	22.5438	32	0.89217	22.1181	31	0.87927
FinnGen_AAA	GCST90027669	99	0.391	1.11119	0.87402-1.4127	0.757	1.0153	0.92214-1.11787	0.118	1.05135	0.98732-1.11952	0.807	0.96812	0.74704-1.25462	0.909	0.98589	0.77376-1.25618	-0.00761	0.64053	0.4	100.852	98	0.40157	100.624	97	0.38027
FinnGen_AAA	GCST90027548	97	0.08	1.1203	0.98802-1.2703	0.032	1.05064	1.00419-1.09924	0.122	1.02487	0.99342-1.05731	0.156	1.09784	0.96600-1.24767	0.131	1.08148	0.97788-1.19607	-0.01204	0.15511	0.282	104.095	96	0.26883	101.892	95	0.2958
FinnGen_AAA	GCST90027702	99	0.423	1.10386	0.86787-1.4040	0.909	1.00543	0.91651-1.10298	0.124	1.05065	0.98659-1.11886	0.82	0.96808	0.73203-1.28024	0.91	0.98591	0.77046-1.26162	-0.00679	0.67742	0.412	101.185	98	0.3926	101.003	97	0.37022
UKB_AAA	GCST90027661	47	0.445	0.94903	0.83080-1.0841	0.366	0.97717	0.92947-1.02732	0.14	0.97365	0.93972-1.00881	0.73	0.98025	0.87585-1.09710	0.762	0.98347	0.88338-1.09491	0.00919	0.69727	0.582	43.1328	46	0.59306	42.9796	45	0.55789
UKB_AAA	GCST90027770	47	0.088	0.9201	0.83778-1.0105	0.62	0.9913	0.95768-1.02610	0.159	0.98225	0.95810-1.00702	0.691	1.0157	0.94096-1.09636	0.682	1.0157	0.94313-1.09384	0.02347	0.16311	0.985	26.3269	46	0.99126	24.3164	45	0.99499
UKB_AAA	GCST90027816	47	0.437	0.96439	0.88084-1.0559	0.503	0.98876	0.95659-1.02201	0.167	0.98317	0.95979-1.00711	0.961	0.99819	0.92899-1.07255	0.952	1.00218	0.93367-1.07571	0.00691	0.66744	0.836	36.8813	46	0.82924	36.6942	45	0.80636
FinnGen_AAA	GCST90027845	98	0.904	1.0196	0.74515-1.3951	0.305	1.06195	0.94665-1.19130	0.171	1.05865	0.97562-1.14875	0.532	1.09612	0.82309-1.45972	0.609	1.06921	0.82795-1.38078	0.00515	0.80824	0.295	104.716	97	0.27842	104.652	96	0.25644
FinnGen_AAA	GCST90027462	98	0.676	0.95007	0.74799-1.2067	0.527	1.02857	0.94257-1.12243	0.175	1.04354	0.98120-1.10983	0.14	1.17662	0.94967-1.45780	0.818	0.97725	0.80377-1.18818	0.01282	0.42805	0.755	86.7532	97	0.76269	86.1197	96	0.75507
FinnGen_AAA	GCST90027538	98	0.819	0.97036	0.75065-1.2544	0.133	0.9343	0.85509-1.02084	0.186	0.95701	0.89662-1.02147	0.379	0.90532	0.72620-1.12863	0.323	0.90532	0.74409-1.10149	-0.00189	0.91308	0.192	109.947	97	0.17399	109.934	96	0.15667
FinnGen_AAA	GCST90027824	98	0.946	0.99584	0.88327-1.1227	0.381	0.97925	0.93436-1.02630	0.198	0.97982	0.94986-1.01074	0.413	0.94883	0.83710-1.07547	0.476	0.95861	0.85385-1.07621	-0.00222	0.7845	0.679	90.4094	97	0.66865	90.3342	96	0.64388
UKB_AAA	GCST90027481	47	0.147	0.95103	0.88972-1.0166	0.498	0.99142	0.96701-1.01644	0.205	0.98865	0.97134-1.00627	0.671	0.98669	0.92794-1.04916	0.707	0.98944	0.93644-1.04545	0.01391	0.24283	0.522	45.3338	46	0.50006	43.9331	45	0.5171
FinnGen_AAA	GCST90027816	98	0.464	1.06089	0.90625-1.2419	0.926	1.00281	0.94547-1.06363	0.24	1.02454	0.98392-1.06684	0.945	0.99523	0.86867-1.14023	0.935	0.99523	0.88798-1.11543	-0.00476	0.65451	0.451	98.8659	97	0.42821	98.6588	96	0.40588
FinnGen_AAA	GCST90027571	98	0.51	0.96246	0.85938-1.0779	0.276	1.02335	0.98173-1.06674	0.241	1.01767	0.98830-1.04791	0.521	1.03665	0.92921-1.15652	0.498	1.03447	0.93817-1.14067	0.00763	0.32031	0.723	88.7026	97	0.71409	87.7046	96	0.7151
FinnGen_AAA	GCST90027789	97	0.528	0.94287	0.78609-1.1309	0.268	0.96406	0.90360-1.02857	0.246	0.97398	0.93158-1.01832	0.251	0.90246	0.75823-1.07413	0.271	0.91669	0.78573-1.06947	0.00439	0.71896	0.416	98.011	96	0.4238	97.8768	95	0.3994
UKB_AAA	GCST90027699	47	0.678	1.01988	0.93001-1.1184	0.589	0.991	0.95901-1.02406	0.259	1.01419	0.98966-1.03932	0.68	0.98487	0.91651-1.05834	0.635	0.98381	0.92018-1.05183	-0.00201	0.90242	0.886	35.4497	46	0.87001	35.4345	45	0.84578
FinnGen_AAA	GCST90027556	98	0.651	0.9741	0.86958-1.0912	0.589	0.98851	0.94791-1.03085	0.26	0.98327	0.95483-1.01256	0.963	1.00252	0.90045-1.11617	0.935	0.99564	0.89684-1.10533	0.00128	0.86729	0.99	68.683	97	0.98693	68.6549	96	0.98424
UKB_AAA	GCST90027605	47	0.889	1.00679	0.91637-1.1061	0.252	0.97981	0.94619-1.01462	0.29	0.98672	0.96257-1.01148	0.545	0.97547	0.90068-1.05646	0.653	0.98122	0.90379-1.06529	-0.00723	0.66559	0.375	48.101	46	0.38778	47.8995	45	0.35596
FinnGen_AAA	GCST90027706	93	0.919	0.98953	0.80885-1.2106	0.243	0.9606	0.89787-1.02770	0.299	0.97609	0.93254-1.02167	0.257	0.90368	0.75941-1.07536	0.303	0.9239	0.79535-1.07322	-0.00182	0.8917	0.427	93.4074	92	0.43946	93.3883	91	0.41105
UKB_AAA	GCST90027789	46	0.883	1.00788	0.90823-1.1185	0.969	0.99926	0.96247-1.03745	0.315	0.98651	0.96069-1.01302	0.884	1.00584	0.93039-1.08741	0.86	1.0071	0.93128-1.08909	-0.00759	0.67845	0.529	44.051	45	0.51208	43.8768	44	0.47687
UKB_AAA	GCST90027548	47	0.885	0.99451	0.92340-1.0711	0.316	0.98669	0.96121-1.01285	0.316	0.99009	0.97102-1.00954	0.48	1.0225	0.96183-1.08700	0.286	0.96743	0.91098-1.02737	-0.00159	0.90349	0.164	54.6905	46	0.17798	54.6724	45	0.153
UKB_AAA	GCST90027536	42	0.034	0.89467	0.81026-0.9879	0.99	1.00023	0.96490-1.03686	0.323	0.98612	0.95918-1.01382	0.77	1.01275	0.93080-1.10193	0.713	1.01524	0.93712-1.09986	0.03544	0.05242	0.041	57.7236	41	0.04327	52.4801	40	0.08934
UKB_AAA	GCST90027539	47	0.401	0.9718	0.90957-1.0383	0.244	1.0147	0.99011-1.03990	0.324	1.00887	0.99133-1.02673	0.352	1.0277	0.97077-1.08797	0.378	1.02692	0.96856-1.08879	0.01342	0.2563	0.589	42.6042	46	0.61529	41.2821	45	0.63021
UKB_AAA	GCST90027772	47	0.616	1.02391	0.93428-1.1221	0.863	0.997	0.96347-1.03170	0.327	1.01223	0.98792-1.03714	0.694	0.98539	0.91606-1.05998	0.716	0.98645	0.91695-1.06121	-0.00411	0.80022	0.843	36.2819	46	0.84708	36.2171	45	0.82185
UKB_AAA	GCST90027682	47	0.875	1.00542	0.94017-1.0752	0.305	1.01326	0.98807-1.03908	0.335	1.00877	0.99100-1.02687	0.586	1.01556	0.96111-1.07310	0.587	1.01465	0.96317-1.06888	0.00119	0.92008	0.518	44.5225	46	0.53425	44.5124	45	0.49249
UKB_AAA	GCST90027841	48	0.954	0.99742	0.91443-1.0879	0.701	0.99349	0.96095-1.02713	0.351	0.98897	0.96616-1.01231	0.482	1.03189	0.94604-1.12552	0.506	1.02989	0.94500-1.12240	-0.00308	0.84271	0.414	48.2792	47	0.42096	48.2375	46	0.38251
UKB_AAA	GCST90027679	47	0.306	0.95062	0.86367-1.0463	0.456	0.98833	0.95830-1.01929	0.369	0.98863	0.96428-1.01360	0.669	0.98267	0.90734-1.06425	0.617	0.98015	0.90653-1.05974	0.01399	0.41111	0.049	63.7692	46	0.04234	62.8085	45	0.04068
UKB_AAA	GCST90027823	48	0.031	1.1847	1.02006-1.3759	0.564	1.01653	0.96148-1.07473	0.373	1.01842	0.97834-1.06013	0.489	1.04312	0.92637-1.17457	0.514	1.0409	0.92374-1.17292	-0.0545	0.04542	0.505	46.7136	47	0.48434	42.4839	46	0.62032
UKB_AAA	GCST90027845	47	0.417	0.93037	0.78292-1.1056	0.95	1.00216	0.93629-1.07267	0.404	1.02032	0.97322-1.06971	0.604	0.95895	0.81925-1.12248	0.64	0.96097	0.81407-1.13438	0.03344	0.28145	0.623	42.9161	46	0.60219	41.7277	45	0.61137
UKB_AAA	GCST90027529	47	0.409	0.97218	0.90976-1.0389	0.652	0.99386	0.96759-1.02083	0.417	0.99273	0.97542-1.01035	0.735	1.01134	0.94770-1.07926	0.822	1.00678	0.94943-1.06759	0.0075	0.52488	0.546	44.3969	46	0.53957	43.9862	45	0.51484
UKB_AAA	GCST90027461	47	0.414	1.03185	0.95775-1.1117	0.82	0.99706	0.97211-1.02265	0.425	0.99198	0.97254-1.01181	0.959	0.99859	0.94610-1.05400	0.959	0.99859	0.94670-1.05333	-0.01412	0.28819	0.085	59.4842	46	0.08754	57.9954	45	0.09253
FinnGen_AAA	GCST90027618	98	0.511	0.96088	0.85333-1.0820	0.581	0.98815	0.94723-1.03085	0.428	0.9877	0.95797-1.01837	0.985	0.99896	0.89552-1.11433	0.799	0.98865	0.90574-1.07915	0.00377	0.63888	0.187	109.206	97	0.18688	108.954	96	0.17272
UKB_AAA	GCST90027824	47	0.673	1.01542	0.94626-1.0896	0.263	1.01514	0.98877-1.04222	0.437	1.00744	0.98879-1.02643	0.235	1.03684	0.97747-1.09982	0.988	0.99954	0.94260-1.05992	-0.00283	0.82116	0.884	34.0201	46	0.90429	33.9684	45	0.8854
FinnGen_AAA	GCST90027481	98	0.469	0.95311	0.83736-1.0849	0.297	0.97651	0.93387-1.02110	0.439	0.98692	0.95453-1.02040	0.417	0.95271	0.84788-1.07049	0.439	0.96015	0.86656-1.06386	0.00477	0.58621	0.035	125.138	97	0.02876	124.751	96	0.0259
UKB_AAA	GCST90027706	44	0.569	1.03356	0.92348-1.1567	0.987	1.00034	0.96198-1.04022	0.456	0.98972	0.96321-1.01695	0.86	1.00669	0.93537-1.08344	0.849	1.00794	0.92941-1.09309	-0.01505	0.44135	0.531	41.9213	43	0.51802	41.3171	42	0.5008
UKB_AAA	GCST90027659	41	0.76	1.01301	0.93279-1.1001	0.496	1.01068	0.98023-1.04207	0.458	1.00799	0.98702-1.02941	0.457	1.02649	0.95875-1.09901	0.488	1.02467	0.95706-1.09707	-0.0018	0.90351	0.383	42.1891	40	0.37649	42.173	39	0.3354
UKB_AAA	GCST90027685	48	0.168	1.08714	0.96712-1.2220	0.67	1.00998	0.96490-1.05716	0.46	1.01205	0.98036-1.04476	0.887	1.00759	0.90868-1.11726	0.781	1.01484	0.91530-1.12520	-0.02588	0.21926	0.385	50.4215	47	0.33977	48.7766	46	0.36201
UKB_AAA	GCST90027746	48	0.168	1.08716	0.96714-1.2221	0.664	1.00994	0.96581-1.05608	0.46	1.01206	0.98037-1.04477	0.886	1.0076	0.90882-1.11711	0.766	1.01485	0.92156-1.11758	-0.02588	0.21918	0.333	50.42	47	0.33982	48.7746	46	0.36209
FinnGen_AAA	GCST90027586	98	0.606	1.03125	0.91787-1.1586	0.508	0.98589	0.94522-1.02831	0.46	1.01136	0.98148-1.04214	0.27	0.94206	0.84770-1.04693	0.292	0.95066	0.86575-1.04390	-0.00266	0.73504	0.361	102.298	97	0.33675	102.176	96	0.31406
UKB_AAA	GCST90027496	47	0.367	1.06357	0.93157-1.2143	0.552	1.01524	0.96591-1.06709	0.507	0.98814	0.95389-1.02361	0.353	1.05346	0.94494-1.17445	0.339	1.05176	0.94946-1.16508	-0.02637	0.26506	0.165	55.0601	46	0.1692	53.5446	45	0.17916
UKB_AAA	GCST90027595	47	0.325	0.96684	0.90470-1.0332	0.57	0.99294	0.96896-1.01750	0.51	1.00594	0.98838-1.02381	0.515	0.98095	0.92622-1.03892	0.427	0.97793	0.92597-1.03282	0.01421	0.23143	0.498	45.3434	46	0.49965	43.8719	45	0.51971
UKB_AAA	GCST90027452	45	0.864	0.98865	0.86832-1.1257	0.874	1.00352	0.96097-1.04795	0.51	0.98913	0.95746-1.02184	0.446	1.04121	0.93942-1.15402	0.4	1.04006	0.94997-1.13869	0.00017	0.99409	0.995	22.8122	44	0.99657	22.8121	43	0.99511
UKB_AAA	GCST90027612	47	0.894	0.9945	0.91750-1.0780	0.852	0.99723	0.96864-1.02667	0.514	0.99291	0.97192-1.01434	0.922	0.99666	0.93261-1.06511	0.897	0.99566	0.93254-1.06305	-0.00057	0.96794	0.526	44.7188	46	0.52595	44.7171	45	0.48384
FinnGen_AAA	GCST90027616	98	0.776	0.983	0.87359-1.1061	0.145	1.03215	0.98910-1.07708	0.535	1.00966	0.97944-1.04082	0.452	1.04294	0.93507-1.16326	0.332	1.04761	0.95403-1.15037	0.00366	0.64638	0.269	105.097	97	0.26979	104.865	96	0.25179
UKB_AAA	GCST90027800	44	0.843	0.98456	0.84459-1.1477	0.841	0.99527	0.95023-1.04245	0.565	0.98937	0.95403-1.02602	0.988	0.99925	0.90496-1.10337	0.986	1.00096	0.90001-1.11324	0.00169	0.94917	0.038	60.5309	43	0.03996	60.5249	42	0.03191
UKB_AAA	GCST90027586	47	0.517	1.02547	0.95092-1.1059	0.523	0.99132	0.96516-1.01819	0.588	0.99451	0.97487-1.01454	0.757	0.98975	0.92745-1.05623	0.8	0.99243	0.93621-1.05203	-0.01099	0.41328	0.11	59.3464	46	0.08949	58.4605	45	0.08587
UKB_AAA	GCST90027827	47	0.902	0.98996	0.84423-1.1608	0.951	1.00166	0.95021-1.05590	0.629	0.98977	0.94931-1.03196	0.371	1.05918	0.93503-1.19982	0.764	1.01875	0.90282-1.14957	-7e-05	0.99805	0.065	61.6772	46	0.06099	61.6771	45	0.04982
FinnGen_AAA	GCST90027498	98	0.344	1.06121	0.93898-1.1993	0.828	0.99491	0.95018-1.04174	0.637	1.00763	0.97628-1.03998	0.692	0.97428	0.85667-1.10803	0.433	0.95564	0.85364-1.06983	-0.00708	0.39247	0.175	109.446	97	0.18263	108.611	96	0.1786
UKB_AAA	GCST90027580	47	0.178	0.89785	0.76946-1.0477	0.955	1.00166	0.94523-1.06145	0.644	0.99035	0.95045-1.03193	0.574	1.03768	0.91305-1.17932	0.667	1.02563	0.91462-1.15010	0.03518	0.2029	0.985	27.6641	46	0.98523	25.9944	45	0.98961
FinnGen_AAA	GCST90027589	99	0.502	1.05936	0.89572-1.2529	0.857	1.00552	0.94719-1.06744	0.653	1.01012	0.96670-1.05549	0.9	0.98913	0.83448-1.17244	0.953	0.99575	0.86567-1.14538	-0.00654	0.56581	0.136	114.218	98	0.12567	113.829	97	0.11665
UKB_AAA	GCST90027571	47	0.09	1.06214	0.99222-1.1370	0.616	0.9934	0.96803-1.01943	0.66	1.00414	0.98582-1.02279	0.709	0.98779	0.92642-1.05322	0.68	0.98779	0.93213-1.04676	-0.02013	0.10061	0.297	50.2479	46	0.30889	47.2946	45	0.37907
UKB_AAA	GCST90027592	47	0.117	1.05576	0.98779-1.1284	0.401	1.0108	0.98577-1.03647	0.663	1.00399	0.98618-1.02212	0.596	1.0148	0.96156-1.07098	0.571	1.01646	0.96102-1.07510	-0.01802	0.13159	0.419	47.4165	46	0.41465	45.0549	45	0.46966
UKB_AAA	GCST90027538	45	0.204	0.89928	0.76523-1.0568	0.685	0.98831	0.93368-1.04614	0.666	0.99087	0.95045-1.03300	0.883	1.00981	0.88771-1.14869	0.922	1.00597	0.89340-1.13273	0.03425	0.22975	0.137	54.1732	44	0.13996	52.3656	43	0.15495
UKB_AAA	GCST90027702	47	0.633	0.96626	0.84001-1.1115	0.642	0.98765	0.93717-1.04084	0.678	0.99211	0.95576-1.02985	0.882	0.99092	0.87921-1.11682	0.865	0.9893	0.87438-1.11933	0.00949	0.7032	0.785	37.8548	46	0.79802	37.7077	45	0.77134
UKB_AAA	GCST90027669	47	0.623	0.96527	0.83904-1.1105	0.651	0.98802	0.93773-1.04101	0.684	0.99226	0.95588-1.03003	0.873	0.99033	0.87974-1.11483	0.861	0.99033	0.88866-1.10365	0.00991	0.69094	0.805	37.7164	46	0.80262	37.5563	45	0.77675
FinnGen_AAA	GCST90027452	98	0.166	1.15688	0.94263-1.4198	0.481	1.02643	0.95467-1.10359	0.697	1.01056	0.95856-1.06537	0.684	1.03864	0.86591-1.24582	0.519	1.0595	0.88927-1.26231	-0.01848	0.18358	0.992	66.3895	97	0.99254	64.5953	96	0.99422
FinnGen_AAA	GCST90027659	88	0.923	1.00695	0.87477-1.1591	0.128	0.96128	0.91364-1.01139	0.702	0.99336	0.96010-1.02777	0.339	0.94765	0.84934-1.05734	0.273	0.94765	0.86126-1.04271	-0.00184	0.84583	0.567	84.871	87	0.54461	84.8329	86	0.51535
FinnGen_AAA	GCST90027595	98	0.497	1.04017	0.92881-1.1649	0.958	1.0012	0.95785-1.04651	0.702	1.00573	0.97670-1.03561	0.855	0.98927	0.88177-1.10987	0.926	1.00497	0.90577-1.11505	-0.0046	0.54771	0.591	93.4796	97	0.58232	93.1155	96	0.56436
FinnGen_AAA	GCST90027661	99	0.716	0.9592	0.76689-1.1997	0.977	0.99876	0.91949-1.08487	0.707	0.98885	0.93261-1.04847	0.887	1.0165	0.81223-1.27213	0.919	0.99043	0.82284-1.19214	0.00418	0.78294	0.758	88.2633	98	0.74918	88.1869	97	0.72732
UKB_AAA	GCST90027469	47	0.114	1.06692	0.98621-1.1542	0.988	0.9998	0.97413-1.02614	0.716	0.99605	0.97503-1.01753	0.806	0.99233	0.93353-1.05483	0.966	0.99886	0.94812-1.05230	-0.02464	0.08247	0.026	66.8739	46	0.0238	62.4928	45	0.04307
UKB_AAA	GCST90027618	47	0.55	1.02027	0.95571-1.0892	0.137	1.01852	0.99417-1.04347	0.721	1.00316	0.98593-1.02069	0.319	1.02907	0.97332-1.08801	0.293	1.02907	0.97619-1.08481	-0.00606	0.60153	0.904	33.9878	46	0.90499	33.7112	45	0.89162
FinnGen_AAA	GCST90027578	98	0.617	0.96845	0.85451-1.0976	0.984	1.00046	0.95761-1.04522	0.724	0.9942	0.96267-1.02677	0.804	1.01514	0.90202-1.14246	0.754	1.01773	0.91210-1.13560	0.00359	0.67148	0.09	117.652	97	0.0755	117.431	96	0.06787
FinnGen_AAA	GCST90027539	98	0.925	1.00541	0.89816-1.1255	0.639	1.01035	0.96779-1.05479	0.732	0.99491	0.96630-1.02436	0.639	1.0256	0.92299-1.13961	0.778	1.01231	0.92997-1.10194	-0.00144	0.85056	0.755	87.1132	97	0.75402	87.0776	96	0.73122
FinnGen_AAA	GCST90027682	98	0.803	1.01557	0.89980-1.1462	0.477	0.98435	0.94248-1.02809	0.748	0.9949	0.96437-1.02640	0.727	0.98011	0.87600-1.09658	0.76	0.98464	0.89197-1.08693	-0.00281	0.731	0.207	107.993	97	0.20933	107.86	96	0.19197
FinnGen_AAA	GCST90027592	98	0.839	0.98782	0.87776-1.1117	0.584	0.98778	0.94527-1.03221	0.75	0.99507	0.96528-1.02578	0.953	1.0036	0.88977-1.13199	0.774	0.98286	0.87392-1.10539	0.001	0.90034	0.283	104.265	97	0.28885	104.248	96	0.26538
FinnGen_AAA	GCST90027827	98	0.932	1.01021	0.80073-1.2745	0.751	1.0138	0.93153-1.10334	0.766	1.00918	0.95025-1.07176	0.838	1.02217	0.82910-1.26019	0.696	1.0361	0.86794-1.23684	-0.00014	0.99288	0.99	68.3619	97	0.98788	68.3619	96	0.98526
FinnGen_AAA	GCST90027469	98	0.237	0.93184	0.82959-1.0467	0.842	0.99553	0.95278-1.04021	0.777	1.00437	0.97452-1.03513	0.598	0.9687	0.86091-1.08998	0.455	0.96466	0.87809-1.05977	0.01025	0.19379	0.353	101.951	97	0.34558	100.164	96	0.36532
UKB_AAA	GCST90027732	47	0.947	0.99736	0.92276-1.0780	0.725	1.00555	0.97499-1.03706	0.815	0.99754	0.97720-1.01831	0.888	1.00457	0.94342-1.06967	0.957	1.00181	0.93887-1.06896	6e-05	0.99624	0.517	44.8689	46	0.51962	44.8689	45	0.47746
FinnGen_AAA	GCST90027719	98	0.564	1.03392	0.92343-1.1576	0.778	1.00611	0.96433-1.04970	0.864	1.00256	0.97369-1.03230	0.954	1.00334	0.89642-1.12301	0.878	1.00772	0.91371-1.11141	-0.00421	0.58165	0.578	94.1192	97	0.56392	93.8136	96	0.5441
FinnGen_AAA	GCST90027783	98	0.13	1.22506	0.94409-1.5896	0.355	1.04548	0.95148-1.14876	0.878	1.00517	0.94115-1.07354	0.563	1.07276	0.84611-1.36013	0.407	1.09256	0.88704-1.34568	-0.02693	0.12727	0.954	75.448	97	0.94853	73.0817	96	0.96067
UKB_AAA	GCST90027578	47	0.088	1.06168	0.99269-1.1355	0.661	1.00538	0.98156-1.02978	0.892	1.00126	0.98318-1.01967	0.68	1.01146	0.95848-1.06737	0.652	1.01236	0.96014-1.06742	-0.021	0.08305	0.332	49.3065	46	0.34238	46.0881	45	0.42701
FinnGen_AAA	GCST90027732	98	0.758	0.97818	0.85018-1.1254	0.181	0.96519	0.91631-1.01668	0.892	0.99751	0.96216-1.03417	0.131	0.91129	0.80867-1.02694	0.136	0.91881	0.82279-1.02605	0.00268	0.77763	0.229	107.481	97	0.21934	107.391	96	0.20065
FinnGen_AAA	GCST90027823	98	0.869	1.02273	0.78389-1.3344	0.631	0.97652	0.88634-1.07588	0.892	0.99533	0.93042-1.06477	0.944	0.99078	0.76489-1.28338	0.864	0.97854	0.76417-1.25304	-0.0037	0.83651	0.934	76.7254	97	0.93609	76.6826	96	0.92667
UKB_AAA	GCST90027556	47	0.651	0.98464	0.92120-1.0524	0.837	0.99745	0.97352-1.02197	0.892	1.00122	0.98370-1.01906	0.712	0.98957	0.93623-1.04595	0.72	0.98957	0.93482-1.04753	0.00599	0.61256	0.913	33.6093	46	0.91294	33.3492	45	0.90003
FinnGen_AAA	GCST90027580	99	0.721	1.0483	0.80981-1.3570	0.656	0.97773	0.88557-1.07950	0.895	0.99545	0.93023-1.06524	0.618	0.93456	0.71671-1.21862	0.801	0.97192	0.77928-1.21218	-0.00711	0.68483	0.766	87.7692	98	0.76109	87.6035	97	0.74198
FinnGen_AAA	GCST90027673	98	0.156	1.08649	0.96972-1.2173	0.9	0.99732	0.95633-1.04008	0.917	1.00157	0.97255-1.03146	0.684	0.97865	0.88220-1.08564	0.831	0.99008	0.90375-1.08465	-0.01113	0.14971	0.729	87.9775	97	0.73262	85.8686	96	0.76116
FinnGen_AAA	GCST90027707	98	0.157	1.0862	0.96945-1.2170	0.897	0.99719	0.95577-1.04041	0.922	1.00147	0.97245-1.03136	0.684	0.97791	0.87836-1.08874	0.822	0.98931	0.90110-1.08617	-0.01111	0.15055	0.714	87.9755	97	0.73267	85.8754	96	0.76099
FinnGen_AAA	GCST90027841	97	0.127	0.87849	0.74504-1.0358	0.743	0.99031	0.93422-1.04977	0.928	0.99811	0.95806-1.03982	0.794	0.97935	0.83743-1.14532	0.959	0.99591	0.85213-1.16395	0.01726	0.12044	0.226	105.267	96	0.24317	102.614	95	0.27882
FinnGen_AAA	GCST90027612	98	0.261	1.08757	0.94028-1.2579	0.869	1.00452	0.95193-1.06002	0.929	0.99834	0.96243-1.03560	0.675	1.03018	0.89706-1.18307	0.697	1.02737	0.89706-1.17660	-0.01164	0.23652	0.309	102.354	97	0.33533	100.864	96	0.3471
FinnGen_AAA	GCST90027461	98	0.214	0.93108	0.83252-1.0413	0.808	0.99472	0.95317-1.03809	0.963	1.00069	0.97215-1.03007	0.893	0.99207	0.88379-1.11361	0.784	0.98588	0.89087-1.09103	0.00986	0.19421	0.543	94.8917	97	0.54161	93.1825	96	0.56242
UKB_AAA	GCST90027498	47	0.811	0.98959	0.90852-1.0779	0.495	1.00943	0.98258-1.03701	0.968	0.99954	0.97737-1.02222	0.309	1.03293	0.97109-1.09871	0.309	1.03176	0.97205-1.09513	0.00359	0.81286	0.006	72.271	46	0.00798	72.1801	45	0.00621
UKB_AAA	GCST90027707	47	0.805	0.99147	0.92648-1.0610	0.806	1.00322	0.97787-1.02922	0.98	1.00023	0.98259-1.01818	0.864	1.00497	0.94968-1.06348	0.879	1.00409	0.95292-1.05802	0.00315	0.79311	0.451	46.5329	46	0.45032	46.4611	45	0.41195
UKB_AAA	GCST90027673	47	0.803	0.99135	0.92634-1.0609	0.815	1.00303	0.97801-1.02869	0.982	1.0002	0.98256-1.01816	0.868	1.00468	0.95109-1.06129	0.89	1.0038	0.95133-1.05918	0.00318	0.79126	0.448	46.5919	46	0.44791	46.5186	45	0.40965
FinnGen_AAA	GCST90027802	90	0.726	1.02175	0.90634-1.1519	0.496	1.0154	0.97174-1.06102	0.991	0.99982	0.96961-1.03098	0.838	1.0113	0.90803-1.12632	0.808	1.01356	0.90942-1.12962	-0.00294	0.71446	0.701	81.4802	89	0.70194	81.3454	88	0.67876
UKB_AAA	GCST90027616	47	0.383	1.03148	0.96269-1.1052	0.096	0.9791	0.95502-1.00379	0.993	0.99992	0.98182-1.01835	0.337	0.97298	0.92061-1.02832	0.323	0.97209	0.91959-1.02758	-0.01114	0.36493	0.31	49.7622	46	0.32594	48.8528	45	0.32099
